# Supplementary material for: Causality Analysis and Cell Network Modeling of Spatial Calcium Signaling Patterns in Liver Lobules
Source: Front Physiol. 2018 Oct 4;9:1377. doi: 10.3389/fphys.2018.01377 (PMC6180170; doi:10.3389/fphys.2018.01377)
Supplement: Supplementary file 1 [file Data_Sheet_1.ZIP]

Archive with 37 entries (34 files):
- Vadigepalli-Supplementary-Data-Code/
- Vadigepalli-Supplementary-Data-Code/adjacency.txt
- __MACOSX/
- __MACOSX/Vadigepalli-Supplementary-Data-Code/
- __MACOSX/Vadigepalli-Supplementary-Data-Code/._adjacency.txt
- Vadigepalli-Supplementary-Data-Code/Ca_waves_author.m
- __MACOSX/Vadigepalli-Supplementary-Data-Code/._Ca_waves_author.m
- Vadigepalli-Supplementary-Data-Code/Ca_waves_reproduced.m
- __MACOSX/Vadigepalli-Supplementary-Data-Code/._Ca_waves_reproduced.m
- Vadigepalli-Supplementary-Data-Code/Cadata-1300cells-processed.txt
- __MACOSX/Vadigepalli-Supplementary-Data-Code/._Cadata-1300cells-processed.txt
- Vadigepalli-Supplementary-Data-Code/Cell_aliases.pdf
- __MACOSX/Vadigepalli-Supplementary-Data-Code/._Cell_aliases.pdf
- Vadigepalli-Supplementary-Data-Code/Fig5_data.txt
- __MACOSX/Vadigepalli-Supplementary-Data-Code/._Fig5_data.txt
- Vadigepalli-Supplementary-Data-Code/Fig6_params.txt
- __MACOSX/Vadigepalli-Supplementary-Data-Code/._Fig6_params.txt
- Vadigepalli-Supplementary-Data-Code/Fig6C_data.txt
- __MACOSX/Vadigepalli-Supplementary-Data-Code/._Fig6C_data.txt
- Vadigepalli-Supplementary-Data-Code/Fig6D_data.txt
- __MACOSX/Vadigepalli-Supplementary-Data-Code/._Fig6D_data.txt
- Vadigepalli-Supplementary-Data-Code/Fig7_Fig8_params.txt
- __MACOSX/Vadigepalli-Supplementary-Data-Code/._Fig7_Fig8_params.txt
- Vadigepalli-Supplementary-Data-Code/Fig7C_data.txt
- __MACOSX/Vadigepalli-Supplementary-Data-Code/._Fig7C_data.txt
- Vadigepalli-Supplementary-Data-Code/Fig7D_data.txt
- __MACOSX/Vadigepalli-Supplementary-Data-Code/._Fig7D_data.txt
- Vadigepalli-Supplementary-Data-Code/Fig8A_data.txt
- __MACOSX/Vadigepalli-Supplementary-Data-Code/._Fig8A_data.txt
- Vadigepalli-Supplementary-Data-Code/Fig8A_Gij.txt
- __MACOSX/Vadigepalli-Supplementary-Data-Code/._Fig8A_Gij.txt
- Vadigepalli-Supplementary-Data-Code/Fig8B_data.txt
- __MACOSX/Vadigepalli-Supplementary-Data-Code/._Fig8B_data.txt
- Vadigepalli-Supplementary-Data-Code/Fig8B_Gij.txt
- __MACOSX/Vadigepalli-Supplementary-Data-Code/._Fig8B_Gij.txt
- Vadigepalli-Supplementary-Data-Code/Figure_plots.R
- __MACOSX/Vadigepalli-Supplementary-Data-Code/._Figure_plots.R
