# Supplementary material for: Causality Analysis and Cell Network Modeling of Spatial Calcium Signaling Patterns in Liver Lobules
Source: Front Physiol. 2018 Oct 4;9:1377. doi: 10.3389/fphys.2018.01377 (PMC6180170; doi:10.3389/fphys.2018.01377)
Supplement: Supplementary file 1 [file Data_Sheet_1.ZIP › Vadigepalli-Supplementary-Data-Code/Ca_waves_author.m]

function [Yca] = Ca_waves_author(k_r,k_ip3,G)

clc

nvars = 5;
ncells = 141;

%%
t = 1:1200;

x0=zeros(nvars*ncells,1);
for j = 1:ncells
    x0(j*nvars-4) = 0.2;
    x0(j*nvars-3) = 0.1;
    x0(j*nvars-2) = 500;
    x0(j*nvars-1) = 0.25;
    x0(j*nvars) = 0.5;      
end

[~,Y]=ode15s(@(t,x) Ca_waves_sim(t,x,k_r,k_ip3,G,x0),t,x0);

Yca = [];

for i = 1:ncells
    Yca = [Yca,Y(:,(5*i-4))];
end

function xdot = Ca_waves_sim(t,x,k_r,k_ip3,G,x0)

if t <= 200
    H = 0;
else
    H = 1.8;
end

A=0.2;
B=0.082;
D=1.6;
E=1;
F=0.01;
k1=0.5;
k2=0.15;
k3=1;
L=0.00015;
k_d=0.34;
k_Hr=1;
k_cat=0.45;

G = G;

%% Cell1
% Compartment: id = cytosol, constant
cytosol_1=1.0;

% Compartment: id = ER_store, constant
ER_store_1=1.0;

% Reaction: free receptor; added
V1a_free_1 = k_r(1) * (1-x(5));

% Reaction: id = hormone binding
V1a_bind_1 = k_Hr * H * x(5);

% Reaction: id = non-sp binding
V1a_ns_1 = k_d * x(5);

% Reaction: id = IP3 synth; added
Vip3_prod_1= k_ip3(1) * H * x(5)/(k_cat + x(5));

% Reaction: id = JChannel
JChannel_1=(1-x(4))*(A*(x(2)*0.5)^4/(x(2)*0.5+k1)^4+L)*(x(3)-x(1));

% Reaction: id = JPump
JPump_1=B*(x(1))^2/((x(1))^2+k2^2);

% Reaction: id = kPLC activity
kPLC_1= Vip3_prod_1 *(1-k3/(x(1)+k3)); % NEW

% Reaction: id = kPhosphatase: IP3 degradation
kPhosphatase_1=D*x(2)*0.5;

% Reaction: id = IP3R inhibition
IP3R_inh_1=E*(x(1))^4*(1-x(4));

% Reaction: id = IP3R activation
IP3R_act_1=F;

% Reaction: id = IP3 exchange
IP3_ex_1=G*(2*x(2)-(x(17)+x(22)));

%########################

%% Cell2
% Compartment: id = cytosol, constant
cytosol_2=1.0;

% Compartment: id = ER_store, constant
ER_store_2=1.0;

% Reaction: free receptor; added
V1a_free_2 = k_r(2) * (1-x(10));

% Reaction: id = hormone binding
V1a_bind_2 = k_Hr * H * x(10);

% Reaction: id = non-sp binding
V1a_ns_2 = k_d * x(10);

% Reaction: id = IP3 synth; added
Vip3_prod_2= k_ip3(2) * H * x(10)/(k_cat + x(10));

% Reaction: id = JChannel
JChannel_2=(1-x(9))*(A*(x(7)*0.5)^4/(x(7)*0.5+k1)^4+L)*(x(8)-x(6));

% Reaction: id = JPump
JPump_2=B*(x(6))^2/((x(6))^2+k2^2);

% Reaction: id = kPLC activity
kPLC_2= Vip3_prod_2 *(1-k3/(x(6)+k3)); % NEW

% Reaction: id = kPhosphatase: IP3 degradation
kPhosphatase_2=D*x(7)*0.5;

% Reaction: id = IP3R inhibition
IP3R_inh_2=E*(x(6))^4*(1-x(9));

% Reaction: id = IP3R activation
IP3R_act_2=F;

% Reaction: id = IP3 exchange
IP3_ex_2=G*(5*x(7)-(x(12)+x(17)+x(22)+x(27)+x(32)));

%########################

%% Cell3
% Compartment: id = cytosol, constant
cytosol_3=1.0;

% Compartment: id = ER_store, constant
ER_store_3=1.0;

% Reaction: free receptor; added
V1a_free_3 = k_r(3) * (1-x(15));

% Reaction: id = hormone binding
V1a_bind_3 = k_Hr * H * x(15);

% Reaction: id = non-sp binding
V1a_ns_3 = k_d * x(15);

% Reaction: id = IP3 synth; added
Vip3_prod_3= k_ip3(3) * H * x(15)/(k_cat + x(15));

% Reaction: id = JChannel
JChannel_3=(1-x(14))*(A*(x(12)*0.5)^4/(x(12)*0.5+k1)^4+L)*(x(13)-x(11));

% Reaction: id = JPump
JPump_3=B*(x(11))^2/((x(11))^2+k2^2);

% Reaction: id = kPLC activity
kPLC_3= Vip3_prod_3 *(1-k3/(x(11)+k3)); % NEW

% Reaction: id = kPhosphatase: IP3 degradation
kPhosphatase_3=D*x(12)*0.5;

% Reaction: id = IP3R inhibition
IP3R_inh_3=E*(x(11))^4*(1-x(14));

% Reaction: id = IP3R activation
IP3R_act_3=F;

% Reaction: id = IP3 exchange
IP3_ex_3=G*(3*x(12)-(x(7)+x(17)+x(597)));

%########################

%% Cell4
% Compartment: id = cytosol, constant
cytosol_4=1.0;

% Compartment: id = ER_store, constant
ER_store_4=1.0;

% Reaction: free receptor; added
V1a_free_4 = k_r(4) * (1-x(20));

% Reaction: id = hormone binding
V1a_bind_4 = k_Hr * H * x(20);

% Reaction: id = non-sp binding
V1a_ns_4 = k_d * x(20);

% Reaction: id = IP3 synth; added
Vip3_prod_4= k_ip3(4) * H * x(20)/(k_cat + x(20));

% Reaction: id = JChannel
JChannel_4=(1-x(19))*(A*(x(17)*0.5)^4/(x(17)*0.5+k1)^4+L)*(x(18)-x(16));

% Reaction: id = JPump
JPump_4=B*(x(16))^2/((x(16))^2+k2^2);

% Reaction: id = kPLC activity
kPLC_4= Vip3_prod_4 *(1-k3/(x(16)+k3)); % NEW

% Reaction: id = kPhosphatase: IP3 degradation
kPhosphatase_4=D*x(17)*0.5;

% Reaction: id = IP3R inhibition
IP3R_inh_4=E*(x(16))^4*(1-x(19));

% Reaction: id = IP3R activation
IP3R_act_4=F;

% Reaction: id = IP3 exchange
IP3_ex_4=G*(4*x(17)-(x(2)+x(7)+x(12)+x(22)));

%########################

%% Cell5
% Compartment: id = cytosol, constant
cytosol_5=1.0;

% Compartment: id = ER_store, constant
ER_store_5=1.0;

% Reaction: free receptor; added
V1a_free_5 = k_r(5) * (1-x(25));

% Reaction: id = hormone binding
V1a_bind_5 = k_Hr * H * x(25);

% Reaction: id = non-sp binding
V1a_ns_5 = k_d * x(25);

% Reaction: id = IP3 synth; added
Vip3_prod_5= k_ip3(5) * H * x(25)/(k_cat + x(25));

% Reaction: id = JChannel
JChannel_5=(1-x(24))*(A*(x(22)*0.5)^4/(x(22)*0.5+k1)^4+L)*(x(23)-x(21));

% Reaction: id = JPump
JPump_5=B*(x(21))^2/((x(21))^2+k2^2);

% Reaction: id = kPLC activity
kPLC_5= Vip3_prod_5 *(1-k3/(x(21)+k3)); % NEW

% Reaction: id = kPhosphatase: IP3 degradation
kPhosphatase_5=D*x(22)*0.5;

% Reaction: id = IP3R inhibition
IP3R_inh_5=E*(x(21))^4*(1-x(24));

% Reaction: id = IP3R activation
IP3R_act_5=F;

% Reaction: id = IP3 exchange
IP3_ex_5=G*(4*x(22)-(x(2)+x(7)+x(17)+x(27)));

%########################

%% Cell6
% Compartment: id = cytosol, constant
cytosol_6=1.0;

% Compartment: id = ER_store, constant
ER_store_6=1.0;

% Reaction: free receptor; added
V1a_free_6 = k_r(6) * (1-x(30));

% Reaction: id = hormone binding
V1a_bind_6 = k_Hr * H * x(30);

% Reaction: id = non-sp binding
V1a_ns_6 = k_d * x(30);

% Reaction: id = IP3 synth; added
Vip3_prod_6= k_ip3(6) * H * x(30)/(k_cat + x(30));

% Reaction: id = JChannel
JChannel_6=(1-x(29))*(A*(x(27)*0.5)^4/(x(27)*0.5+k1)^4+L)*(x(28)-x(26));

% Reaction: id = JPump
JPump_6=B*(x(26))^2/((x(26))^2+k2^2);

% Reaction: id = kPLC activity
kPLC_6= Vip3_prod_6 *(1-k3/(x(26)+k3)); % NEW

% Reaction: id = kPhosphatase: IP3 degradation
kPhosphatase_6=D*x(27)*0.5;

% Reaction: id = IP3R inhibition
IP3R_inh_6=E*(x(26))^4*(1-x(29));

% Reaction: id = IP3R activation
IP3R_act_6=F;

% Reaction: id = IP3 exchange
IP3_ex_6=G*(4*x(27)-(x(7)+x(22)+x(32)+x(602)));

%########################

%% Cell7
% Compartment: id = cytosol, constant
cytosol_7=1.0;

% Compartment: id = ER_store, constant
ER_store_7=1.0;

% Reaction: free receptor; added
V1a_free_7 = k_r(7) * (1-x(35));

% Reaction: id = hormone binding
V1a_bind_7 = k_Hr * H * x(35);

% Reaction: id = non-sp binding
V1a_ns_7 = k_d * x(35);

% Reaction: id = IP3 synth; added
Vip3_prod_7= k_ip3(7) * H * x(35)/(k_cat + x(35));

% Reaction: id = JChannel
JChannel_7=(1-x(34))*(A*(x(32)*0.5)^4/(x(32)*0.5+k1)^4+L)*(x(33)-x(31));

% Reaction: id = JPump
JPump_7=B*(x(31))^2/((x(31))^2+k2^2);

% Reaction: id = kPLC activity
kPLC_7= Vip3_prod_7 *(1-k3/(x(31)+k3)); % NEW

% Reaction: id = kPhosphatase: IP3 degradation
kPhosphatase_7=D*x(32)*0.5;

% Reaction: id = IP3R inhibition
IP3R_inh_7=E*(x(31))^4*(1-x(34));

% Reaction: id = IP3R activation
IP3R_act_7=F;

% Reaction: id = IP3 exchange
IP3_ex_7=G*(3*x(32)-(x(7)+x(27)+x(47)));

%########################

%% Cell8
% Compartment: id = cytosol, constant
cytosol_8=1.0;

% Compartment: id = ER_store, constant
ER_store_8=1.0;

% Reaction: free receptor; added
V1a_free_8 = k_r(8) * (1-x(40));

% Reaction: id = hormone binding
V1a_bind_8 = k_Hr * H * x(40);

% Reaction: id = non-sp binding
V1a_ns_8 = k_d * x(40);

% Reaction: id = IP3 synth; added
Vip3_prod_8= k_ip3(8) * H * x(40)/(k_cat + x(40));

% Reaction: id = JChannel
JChannel_8=(1-x(39))*(A*(x(37)*0.5)^4/(x(37)*0.5+k1)^4+L)*(x(38)-x(36));

% Reaction: id = JPump
JPump_8=B*(x(36))^2/((x(36))^2+k2^2);

% Reaction: id = kPLC activity
kPLC_8= Vip3_prod_8 *(1-k3/(x(36)+k3)); % NEW

% Reaction: id = kPhosphatase: IP3 degradation
kPhosphatase_8=D*x(37)*0.5;

% Reaction: id = IP3R inhibition
IP3R_inh_8=E*(x(36))^4*(1-x(39));

% Reaction: id = IP3R activation
IP3R_act_8=F;

% Reaction: id = IP3 exchange
IP3_ex_8=G*(2*x(37)-(x(42)+x(602)));

%########################

%% Cell9
% Compartment: id = cytosol, constant
cytosol_9=1.0;

% Compartment: id = ER_store, constant
ER_store_9=1.0;

% Reaction: free receptor; added
V1a_free_9 = k_r(9) * (1-x(45));

% Reaction: id = hormone binding
V1a_bind_9 = k_Hr * H * x(45);

% Reaction: id = non-sp binding
V1a_ns_9 = k_d * x(45);

% Reaction: id = IP3 synth; added
Vip3_prod_9= k_ip3(9) * H * x(45)/(k_cat + x(45));

% Reaction: id = JChannel
JChannel_9=(1-x(44))*(A*(x(42)*0.5)^4/(x(42)*0.5+k1)^4+L)*(x(43)-x(41));

% Reaction: id = JPump
JPump_9=B*(x(41))^2/((x(41))^2+k2^2);

% Reaction: id = kPLC activity
kPLC_9= Vip3_prod_9 *(1-k3/(x(41)+k3)); % NEW

% Reaction: id = kPhosphatase: IP3 degradation
kPhosphatase_9=D*x(42)*0.5;

% Reaction: id = IP3R inhibition
IP3R_inh_9=E*(x(41))^4*(1-x(44));

% Reaction: id = IP3R activation
IP3R_act_9=F;

% Reaction: id = IP3 exchange
IP3_ex_9=G*(2*x(42)-(x(37)+x(607)));

%########################

%% Cell10
% Compartment: id = cytosol, constant
cytosol_10=1.0;

% Compartment: id = ER_store, constant
ER_store_10=1.0;

% Reaction: free receptor; added
V1a_free_10 = k_r(10) * (1-x(50));

% Reaction: id = hormone binding
V1a_bind_10 = k_Hr * H * x(50);

% Reaction: id = non-sp binding
V1a_ns_10 = k_d * x(50);

% Reaction: id = IP3 synth; added
Vip3_prod_10= k_ip3(10) * H * x(50)/(k_cat + x(50));

% Reaction: id = JChannel
JChannel_10=(1-x(49))*(A*(x(47)*0.5)^4/(x(47)*0.5+k1)^4+L)*(x(48)-x(46));

% Reaction: id = JPump
JPump_10=B*(x(46))^2/((x(46))^2+k2^2);

% Reaction: id = kPLC activity
kPLC_10= Vip3_prod_10 *(1-k3/(x(46)+k3)); % NEW

% Reaction: id = kPhosphatase: IP3 degradation
kPhosphatase_10=D*x(47)*0.5;

% Reaction: id = IP3R inhibition
IP3R_inh_10=E*(x(46))^4*(1-x(49));

% Reaction: id = IP3R activation
IP3R_act_10=F;

% Reaction: id = IP3 exchange
IP3_ex_10=G*(3*x(47)-(x(32)+x(52)+x(82)));

%########################

%% Cell11
% Compartment: id = cytosol, constant
cytosol_11=1.0;

% Compartment: id = ER_store, constant
ER_store_11=1.0;

% Reaction: free receptor; added
V1a_free_11 = k_r(11) * (1-x(55));

% Reaction: id = hormone binding
V1a_bind_11 = k_Hr * H * x(55);

% Reaction: id = non-sp binding
V1a_ns_11 = k_d * x(55);

% Reaction: id = IP3 synth; added
Vip3_prod_11= k_ip3(11) * H * x(55)/(k_cat + x(55));

% Reaction: id = JChannel
JChannel_11=(1-x(54))*(A*(x(52)*0.5)^4/(x(52)*0.5+k1)^4+L)*(x(53)-x(51));

% Reaction: id = JPump
JPump_11=B*(x(51))^2/((x(51))^2+k2^2);

% Reaction: id = kPLC activity
kPLC_11= Vip3_prod_11 *(1-k3/(x(51)+k3)); % NEW

% Reaction: id = kPhosphatase: IP3 degradation
kPhosphatase_11=D*x(52)*0.5;

% Reaction: id = IP3R inhibition
IP3R_inh_11=E*(x(51))^4*(1-x(54));

% Reaction: id = IP3R activation
IP3R_act_11=F;

% Reaction: id = IP3 exchange
IP3_ex_11=G*(2*x(52)-(x(47)+x(92)));

%########################

%% Cell12
% Compartment: id = cytosol, constant
cytosol_12=1.0;

% Compartment: id = ER_store, constant
ER_store_12=1.0;

% Reaction: free receptor; added
V1a_free_12 = k_r(12) * (1-x(60));

% Reaction: id = hormone binding
V1a_bind_12 = k_Hr * H * x(60);

% Reaction: id = non-sp binding
V1a_ns_12 = k_d * x(60);

% Reaction: id = IP3 synth; added
Vip3_prod_12= k_ip3(12) * H * x(60)/(k_cat + x(60));

% Reaction: id = JChannel
JChannel_12=(1-x(59))*(A*(x(57)*0.5)^4/(x(57)*0.5+k1)^4+L)*(x(58)-x(56));

% Reaction: id = JPump
JPump_12=B*(x(56))^2/((x(56))^2+k2^2);

% Reaction: id = kPLC activity
kPLC_12= Vip3_prod_12 *(1-k3/(x(56)+k3)); % NEW

% Reaction: id = kPhosphatase: IP3 degradation
kPhosphatase_12=D*x(57)*0.5;

% Reaction: id = IP3R inhibition
IP3R_inh_12=E*(x(56))^4*(1-x(59));

% Reaction: id = IP3R activation
IP3R_act_12=F;

% Reaction: id = IP3 exchange
IP3_ex_12=G*(2*x(57)-(x(62)+x(92)));

%########################

%% Cell13
% Compartment: id = cytosol, constant
cytosol_13=1.0;

% Compartment: id = ER_store, constant
ER_store_13=1.0;

% Reaction: free receptor; added
V1a_free_13 = k_r(13) * (1-x(65));

% Reaction: id = hormone binding
V1a_bind_13 = k_Hr * H * x(65);

% Reaction: id = non-sp binding
V1a_ns_13 = k_d * x(65);

% Reaction: id = IP3 synth; added
Vip3_prod_13= k_ip3(13) * H * x(65)/(k_cat + x(65));

% Reaction: id = JChannel
JChannel_13=(1-x(64))*(A*(x(62)*0.5)^4/(x(62)*0.5+k1)^4+L)*(x(63)-x(61));

% Reaction: id = JPump
JPump_13=B*(x(61))^2/((x(61))^2+k2^2);

% Reaction: id = kPLC activity
kPLC_13= Vip3_prod_13 *(1-k3/(x(61)+k3)); % NEW

% Reaction: id = kPhosphatase: IP3 degradation
kPhosphatase_13=D*x(62)*0.5;

% Reaction: id = IP3R inhibition
IP3R_inh_13=E*(x(61))^4*(1-x(64));

% Reaction: id = IP3R activation
IP3R_act_13=F;

% Reaction: id = IP3 exchange
IP3_ex_13=G*(2*x(62)-(x(57)+x(67)));

%########################

%% Cell14
% Compartment: id = cytosol, constant
cytosol_14=1.0;

% Compartment: id = ER_store, constant
ER_store_14=1.0;

% Reaction: free receptor; added
V1a_free_14 = k_r(14) * (1-x(70));

% Reaction: id = hormone binding
V1a_bind_14 = k_Hr * H * x(70);

% Reaction: id = non-sp binding
V1a_ns_14 = k_d * x(70);

% Reaction: id = IP3 synth; added
Vip3_prod_14= k_ip3(14) * H * x(70)/(k_cat + x(70));

% Reaction: id = JChannel
JChannel_14=(1-x(69))*(A*(x(67)*0.5)^4/(x(67)*0.5+k1)^4+L)*(x(68)-x(66));

% Reaction: id = JPump
JPump_14=B*(x(66))^2/((x(66))^2+k2^2);

% Reaction: id = kPLC activity
kPLC_14= Vip3_prod_14 *(1-k3/(x(66)+k3)); % NEW

% Reaction: id = kPhosphatase: IP3 degradation
kPhosphatase_14=D*x(67)*0.5;

% Reaction: id = IP3R inhibition
IP3R_inh_14=E*(x(66))^4*(1-x(69));

% Reaction: id = IP3R activation
IP3R_act_14=F;

% Reaction: id = IP3 exchange
IP3_ex_14=G*(2*x(67)-(x(62)+x(72)));

%########################

%% Cell15
% Compartment: id = cytosol, constant
cytosol_15=1.0;

% Compartment: id = ER_store, constant
ER_store_15=1.0;

% Reaction: free receptor; added
V1a_free_15 = k_r(15) * (1-x(75));

% Reaction: id = hormone binding
V1a_bind_15 = k_Hr * H * x(75);

% Reaction: id = non-sp binding
V1a_ns_15 = k_d * x(75);

% Reaction: id = IP3 synth; added
Vip3_prod_15= k_ip3(15) * H * x(75)/(k_cat + x(75));

% Reaction: id = JChannel
JChannel_15=(1-x(74))*(A*(x(72)*0.5)^4/(x(72)*0.5+k1)^4+L)*(x(73)-x(71));

% Reaction: id = JPump
JPump_15=B*(x(71))^2/((x(71))^2+k2^2);

% Reaction: id = kPLC activity
kPLC_15= Vip3_prod_15 *(1-k3/(x(71)+k3)); % NEW

% Reaction: id = kPhosphatase: IP3 degradation
kPhosphatase_15=D*x(72)*0.5;

% Reaction: id = IP3R inhibition
IP3R_inh_15=E*(x(71))^4*(1-x(74));

% Reaction: id = IP3R activation
IP3R_act_15=F;

% Reaction: id = IP3 exchange
IP3_ex_15=G*(5*x(72)-(x(67)+x(102)+x(107)+x(112)+x(612)));

%########################

%% Cell16
% Compartment: id = cytosol, constant
cytosol_16=1.0;

% Compartment: id = ER_store, constant
ER_store_16=1.0;

% Reaction: free receptor; added
V1a_free_16 = k_r(16) * (1-x(80));

% Reaction: id = hormone binding
V1a_bind_16 = k_Hr * H * x(80);

% Reaction: id = non-sp binding
V1a_ns_16 = k_d * x(80);

% Reaction: id = IP3 synth; added
Vip3_prod_16= k_ip3(16) * H * x(80)/(k_cat + x(80));

% Reaction: id = JChannel
JChannel_16=(1-x(79))*(A*(x(77)*0.5)^4/(x(77)*0.5+k1)^4+L)*(x(78)-x(76));

% Reaction: id = JPump
JPump_16=B*(x(76))^2/((x(76))^2+k2^2);

% Reaction: id = kPLC activity
kPLC_16= Vip3_prod_16 *(1-k3/(x(76)+k3)); % NEW

% Reaction: id = kPhosphatase: IP3 degradation
kPhosphatase_16=D*x(77)*0.5;

% Reaction: id = IP3R inhibition
IP3R_inh_16=E*(x(76))^4*(1-x(79));

% Reaction: id = IP3R activation
IP3R_act_16=F;

% Reaction: id = IP3 exchange
IP3_ex_16=G*(4*x(77)-(x(82)+x(87)+x(177)+x(597)));

%########################

%% Cell17
% Compartment: id = cytosol, constant
cytosol_17=1.0;

% Compartment: id = ER_store, constant
ER_store_17=1.0;

% Reaction: free receptor; added
V1a_free_17 = k_r(17) * (1-x(85));

% Reaction: id = hormone binding
V1a_bind_17 = k_Hr * H * x(85);

% Reaction: id = non-sp binding
V1a_ns_17 = k_d * x(85);

% Reaction: id = IP3 synth; added
Vip3_prod_17= k_ip3(17) * H * x(85)/(k_cat + x(85));

% Reaction: id = JChannel
JChannel_17=(1-x(84))*(A*(x(82)*0.5)^4/(x(82)*0.5+k1)^4+L)*(x(83)-x(81));

% Reaction: id = JPump
JPump_17=B*(x(81))^2/((x(81))^2+k2^2);

% Reaction: id = kPLC activity
kPLC_17= Vip3_prod_17 *(1-k3/(x(81)+k3)); % NEW

% Reaction: id = kPhosphatase: IP3 degradation
kPhosphatase_17=D*x(82)*0.5;

% Reaction: id = IP3R inhibition
IP3R_inh_17=E*(x(81))^4*(1-x(84));

% Reaction: id = IP3R activation
IP3R_act_17=F;

% Reaction: id = IP3 exchange
IP3_ex_17=G*(4*x(82)-(x(47)+x(77)+x(87)+x(97)));

%########################

%% Cell18
% Compartment: id = cytosol, constant
cytosol_18=1.0;

% Compartment: id = ER_store, constant
ER_store_18=1.0;

% Reaction: free receptor; added
V1a_free_18 = k_r(18) * (1-x(90));

% Reaction: id = hormone binding
V1a_bind_18 = k_Hr * H * x(90);

% Reaction: id = non-sp binding
V1a_ns_18 = k_d * x(90);

% Reaction: id = IP3 synth; added
Vip3_prod_18= k_ip3(18) * H * x(90)/(k_cat + x(90));

% Reaction: id = JChannel
JChannel_18=(1-x(89))*(A*(x(87)*0.5)^4/(x(87)*0.5+k1)^4+L)*(x(88)-x(86));

% Reaction: id = JPump
JPump_18=B*(x(86))^2/((x(86))^2+k2^2);

% Reaction: id = kPLC activity
kPLC_18= Vip3_prod_18 *(1-k3/(x(86)+k3)); % NEW

% Reaction: id = kPhosphatase: IP3 degradation
kPhosphatase_18=D*x(87)*0.5;

% Reaction: id = IP3R inhibition
IP3R_inh_18=E*(x(86))^4*(1-x(89));

% Reaction: id = IP3R activation
IP3R_act_18=F;

% Reaction: id = IP3 exchange
IP3_ex_18=G*(5*x(87)-(x(77)+x(82)+x(162)+x(177)+x(617)));

%########################

%% Cell19
% Compartment: id = cytosol, constant
cytosol_19=1.0;

% Compartment: id = ER_store, constant
ER_store_19=1.0;

% Reaction: free receptor; added
V1a_free_19 = k_r(19) * (1-x(95));

% Reaction: id = hormone binding
V1a_bind_19 = k_Hr * H * x(95);

% Reaction: id = non-sp binding
V1a_ns_19 = k_d * x(95);

% Reaction: id = IP3 synth; added
Vip3_prod_19= k_ip3(19) * H * x(95)/(k_cat + x(95));

% Reaction: id = JChannel
JChannel_19=(1-x(94))*(A*(x(92)*0.5)^4/(x(92)*0.5+k1)^4+L)*(x(93)-x(91));

% Reaction: id = JPump
JPump_19=B*(x(91))^2/((x(91))^2+k2^2);

% Reaction: id = kPLC activity
kPLC_19= Vip3_prod_19 *(1-k3/(x(91)+k3)); % NEW

% Reaction: id = kPhosphatase: IP3 degradation
kPhosphatase_19=D*x(92)*0.5;

% Reaction: id = IP3R inhibition
IP3R_inh_19=E*(x(91))^4*(1-x(94));

% Reaction: id = IP3R activation
IP3R_act_19=F;

% Reaction: id = IP3 exchange
IP3_ex_19=G*(3*x(92)-(x(52)+x(57)+x(117)));

%########################

%% Cell20
% Compartment: id = cytosol, constant
cytosol_20=1.0;

% Compartment: id = ER_store, constant
ER_store_20=1.0;

% Reaction: free receptor; added
V1a_free_20 = k_r(20) * (1-x(100));

% Reaction: id = hormone binding
V1a_bind_20 = k_Hr * H * x(100);

% Reaction: id = non-sp binding
V1a_ns_20 = k_d * x(100);

% Reaction: id = IP3 synth; added
Vip3_prod_20= k_ip3(20) * H * x(100)/(k_cat + x(100));

% Reaction: id = JChannel
JChannel_20=(1-x(99))*(A*(x(97)*0.5)^4/(x(97)*0.5+k1)^4+L)*(x(98)-x(96));

% Reaction: id = JPump
JPump_20=B*(x(96))^2/((x(96))^2+k2^2);

% Reaction: id = kPLC activity
kPLC_20= Vip3_prod_20 *(1-k3/(x(96)+k3)); % NEW

% Reaction: id = kPhosphatase: IP3 degradation
kPhosphatase_20=D*x(97)*0.5;

% Reaction: id = IP3R inhibition
IP3R_inh_20=E*(x(96))^4*(1-x(99));

% Reaction: id = IP3R activation
IP3R_act_20=F;

% Reaction: id = IP3 exchange
IP3_ex_20=G*(4*x(97)-(x(82)+x(117)+x(122)+x(127)));

%########################

%% Cell21
% Compartment: id = cytosol, constant
cytosol_21=1.0;

% Compartment: id = ER_store, constant
ER_store_21=1.0;

% Reaction: free receptor; added
V1a_free_21 = k_r(21) * (1-x(105));

% Reaction: id = hormone binding
V1a_bind_21 = k_Hr * H * x(105);

% Reaction: id = non-sp binding
V1a_ns_21 = k_d * x(105);

% Reaction: id = IP3 synth; added
Vip3_prod_21= k_ip3(21) * H * x(105)/(k_cat + x(105));

% Reaction: id = JChannel
JChannel_21=(1-x(104))*(A*(x(102)*0.5)^4/(x(102)*0.5+k1)^4+L)*(x(103)-x(101));

% Reaction: id = JPump
JPump_21=B*(x(101))^2/((x(101))^2+k2^2);

% Reaction: id = kPLC activity
kPLC_21= Vip3_prod_21 *(1-k3/(x(101)+k3)); % NEW

% Reaction: id = kPhosphatase: IP3 degradation
kPhosphatase_21=D*x(102)*0.5;

% Reaction: id = IP3R inhibition
IP3R_inh_21=E*(x(101))^4*(1-x(104));

% Reaction: id = IP3R activation
IP3R_act_21=F;

% Reaction: id = IP3 exchange
IP3_ex_21=G*(4*x(102)-(x(72)+x(107)+x(622)+x(627)));

%########################

%% Cell22
% Compartment: id = cytosol, constant
cytosol_22=1.0;

% Compartment: id = ER_store, constant
ER_store_22=1.0;

% Reaction: free receptor; added
V1a_free_22 = k_r(22) * (1-x(110));

% Reaction: id = hormone binding
V1a_bind_22 = k_Hr * H * x(110);

% Reaction: id = non-sp binding
V1a_ns_22 = k_d * x(110);

% Reaction: id = IP3 synth; added
Vip3_prod_22= k_ip3(22) * H * x(110)/(k_cat + x(110));

% Reaction: id = JChannel
JChannel_22=(1-x(109))*(A*(x(107)*0.5)^4/(x(107)*0.5+k1)^4+L)*(x(108)-x(106));

% Reaction: id = JPump
JPump_22=B*(x(106))^2/((x(106))^2+k2^2);

% Reaction: id = kPLC activity
kPLC_22= Vip3_prod_22 *(1-k3/(x(106)+k3)); % NEW

% Reaction: id = kPhosphatase: IP3 degradation
kPhosphatase_22=D*x(107)*0.5;

% Reaction: id = IP3R inhibition
IP3R_inh_22=E*(x(106))^4*(1-x(109));

% Reaction: id = IP3R activation
IP3R_act_22=F;

% Reaction: id = IP3 exchange
IP3_ex_22=G*(4*x(107)-(x(72)+x(102)+x(112)+x(217)));

%########################

%% Cell23
% Compartment: id = cytosol, constant
cytosol_23=1.0;

% Compartment: id = ER_store, constant
ER_store_23=1.0;

% Reaction: free receptor; added
V1a_free_23 = k_r(23) * (1-x(115));

% Reaction: id = hormone binding
V1a_bind_23 = k_Hr * H * x(115);

% Reaction: id = non-sp binding
V1a_ns_23 = k_d * x(115);

% Reaction: id = IP3 synth; added
Vip3_prod_23= k_ip3(23) * H * x(115)/(k_cat + x(115));

% Reaction: id = JChannel
JChannel_23=(1-x(114))*(A*(x(112)*0.5)^4/(x(112)*0.5+k1)^4+L)*(x(113)-x(111));

% Reaction: id = JPump
JPump_23=B*(x(111))^2/((x(111))^2+k2^2);

% Reaction: id = kPLC activity
kPLC_23= Vip3_prod_23 *(1-k3/(x(111)+k3)); % NEW

% Reaction: id = kPhosphatase: IP3 degradation
kPhosphatase_23=D*x(112)*0.5;

% Reaction: id = IP3R inhibition
IP3R_inh_23=E*(x(111))^4*(1-x(114));

% Reaction: id = IP3R activation
IP3R_act_23=F;

% Reaction: id = IP3 exchange
IP3_ex_23=G*(5*x(112)-(x(72)+x(107)+x(132)+x(217)+x(612)));

%########################

%% Cell24
% Compartment: id = cytosol, constant
cytosol_24=1.0;

% Compartment: id = ER_store, constant
ER_store_24=1.0;

% Reaction: free receptor; added
V1a_free_24 = k_r(24) * (1-x(120));

% Reaction: id = hormone binding
V1a_bind_24 = k_Hr * H * x(120);

% Reaction: id = non-sp binding
V1a_ns_24 = k_d * x(120);

% Reaction: id = IP3 synth; added
Vip3_prod_24= k_ip3(24) * H * x(120)/(k_cat + x(120));

% Reaction: id = JChannel
JChannel_24=(1-x(119))*(A*(x(117)*0.5)^4/(x(117)*0.5+k1)^4+L)*(x(118)-x(116));

% Reaction: id = JPump
JPump_24=B*(x(116))^2/((x(116))^2+k2^2);

% Reaction: id = kPLC activity
kPLC_24= Vip3_prod_24 *(1-k3/(x(116)+k3)); % NEW

% Reaction: id = kPhosphatase: IP3 degradation
kPhosphatase_24=D*x(117)*0.5;

% Reaction: id = IP3R inhibition
IP3R_inh_24=E*(x(116))^4*(1-x(119));

% Reaction: id = IP3R activation
IP3R_act_24=F;

% Reaction: id = IP3 exchange
IP3_ex_24=G*(5*x(117)-(x(92)+x(97)+x(122)+x(127)+x(622)));

%########################

%% Cell25
% Compartment: id = cytosol, constant
cytosol_25=1.0;

% Compartment: id = ER_store, constant
ER_store_25=1.0;

% Reaction: free receptor; added
V1a_free_25 = k_r(25) * (1-x(125));

% Reaction: id = hormone binding
V1a_bind_25 = k_Hr * H * x(125);

% Reaction: id = non-sp binding
V1a_ns_25 = k_d * x(125);

% Reaction: id = IP3 synth; added
Vip3_prod_25= k_ip3(25) * H * x(125)/(k_cat + x(125));

% Reaction: id = JChannel
JChannel_25=(1-x(124))*(A*(x(122)*0.5)^4/(x(122)*0.5+k1)^4+L)*(x(123)-x(121));

% Reaction: id = JPump
JPump_25=B*(x(121))^2/((x(121))^2+k2^2);

% Reaction: id = kPLC activity
kPLC_25= Vip3_prod_25 *(1-k3/(x(121)+k3)); % NEW

% Reaction: id = kPhosphatase: IP3 degradation
kPhosphatase_25=D*x(122)*0.5;

% Reaction: id = IP3R inhibition
IP3R_inh_25=E*(x(121))^4*(1-x(124));

% Reaction: id = IP3R activation
IP3R_act_25=F;

% Reaction: id = IP3 exchange
IP3_ex_25=G*(4*x(122)-(x(97)+x(117)+x(127)+x(617)));

%########################

%% Cell26
% Compartment: id = cytosol, constant
cytosol_26=1.0;

% Compartment: id = ER_store, constant
ER_store_26=1.0;

% Reaction: free receptor; added
V1a_free_26 = k_r(26) * (1-x(130));

% Reaction: id = hormone binding
V1a_bind_26 = k_Hr * H * x(130);

% Reaction: id = non-sp binding
V1a_ns_26 = k_d * x(130);

% Reaction: id = IP3 synth; added
Vip3_prod_26= k_ip3(26) * H * x(130)/(k_cat + x(130));

% Reaction: id = JChannel
JChannel_26=(1-x(129))*(A*(x(127)*0.5)^4/(x(127)*0.5+k1)^4+L)*(x(128)-x(126));

% Reaction: id = JPump
JPump_26=B*(x(126))^2/((x(126))^2+k2^2);

% Reaction: id = kPLC activity
kPLC_26= Vip3_prod_26 *(1-k3/(x(126)+k3)); % NEW

% Reaction: id = kPhosphatase: IP3 degradation
kPhosphatase_26=D*x(127)*0.5;

% Reaction: id = IP3R inhibition
IP3R_inh_26=E*(x(126))^4*(1-x(129));

% Reaction: id = IP3R activation
IP3R_act_26=F;

% Reaction: id = IP3 exchange
IP3_ex_26=G*(5*x(127)-(x(97)+x(117)+x(122)+x(622)+x(627)));

%########################

%% Cell27
% Compartment: id = cytosol, constant
cytosol_27=1.0;

% Compartment: id = ER_store, constant
ER_store_27=1.0;

% Reaction: free receptor; added
V1a_free_27 = k_r(27) * (1-x(135));

% Reaction: id = hormone binding
V1a_bind_27 = k_Hr * H * x(135);

% Reaction: id = non-sp binding
V1a_ns_27 = k_d * x(135);

% Reaction: id = IP3 synth; added
Vip3_prod_27= k_ip3(27) * H * x(135)/(k_cat + x(135));

% Reaction: id = JChannel
JChannel_27=(1-x(134))*(A*(x(132)*0.5)^4/(x(132)*0.5+k1)^4+L)*(x(133)-x(131));

% Reaction: id = JPump
JPump_27=B*(x(131))^2/((x(131))^2+k2^2);

% Reaction: id = kPLC activity
kPLC_27= Vip3_prod_27 *(1-k3/(x(131)+k3)); % NEW

% Reaction: id = kPhosphatase: IP3 degradation
kPhosphatase_27=D*x(132)*0.5;

% Reaction: id = IP3R inhibition
IP3R_inh_27=E*(x(131))^4*(1-x(134));

% Reaction: id = IP3R activation
IP3R_act_27=F;

% Reaction: id = IP3 exchange
IP3_ex_27=G*(5*x(132)-(x(112)+x(137)+x(142)+x(217)+x(632)));

%########################

%% Cell28
% Compartment: id = cytosol, constant
cytosol_28=1.0;

% Compartment: id = ER_store, constant
ER_store_28=1.0;

% Reaction: free receptor; added
V1a_free_28 = k_r(28) * (1-x(140));

% Reaction: id = hormone binding
V1a_bind_28 = k_Hr * H * x(140);

% Reaction: id = non-sp binding
V1a_ns_28 = k_d * x(140);

% Reaction: id = IP3 synth; added
Vip3_prod_28= k_ip3(28) * H * x(140)/(k_cat + x(140));

% Reaction: id = JChannel
JChannel_28=(1-x(139))*(A*(x(137)*0.5)^4/(x(137)*0.5+k1)^4+L)*(x(138)-x(136));

% Reaction: id = JPump
JPump_28=B*(x(136))^2/((x(136))^2+k2^2);

% Reaction: id = kPLC activity
kPLC_28= Vip3_prod_28 *(1-k3/(x(136)+k3)); % NEW

% Reaction: id = kPhosphatase: IP3 degradation
kPhosphatase_28=D*x(137)*0.5;

% Reaction: id = IP3R inhibition
IP3R_inh_28=E*(x(136))^4*(1-x(139));

% Reaction: id = IP3R activation
IP3R_act_28=F;

% Reaction: id = IP3 exchange
IP3_ex_28=G*(3*x(137)-(x(132)+x(142)+x(147)));

%########################

%% Cell29
% Compartment: id = cytosol, constant
cytosol_29=1.0;

% Compartment: id = ER_store, constant
ER_store_29=1.0;

% Reaction: free receptor; added
V1a_free_29 = k_r(29) * (1-x(145));

% Reaction: id = hormone binding
V1a_bind_29 = k_Hr * H * x(145);

% Reaction: id = non-sp binding
V1a_ns_29 = k_d * x(145);

% Reaction: id = IP3 synth; added
Vip3_prod_29= k_ip3(29) * H * x(145)/(k_cat + x(145));

% Reaction: id = JChannel
JChannel_29=(1-x(144))*(A*(x(142)*0.5)^4/(x(142)*0.5+k1)^4+L)*(x(143)-x(141));

% Reaction: id = JPump
JPump_29=B*(x(141))^2/((x(141))^2+k2^2);

% Reaction: id = kPLC activity
kPLC_29= Vip3_prod_29 *(1-k3/(x(141)+k3)); % NEW

% Reaction: id = kPhosphatase: IP3 degradation
kPhosphatase_29=D*x(142)*0.5;

% Reaction: id = IP3R inhibition
IP3R_inh_29=E*(x(141))^4*(1-x(144));

% Reaction: id = IP3R activation
IP3R_act_29=F;

% Reaction: id = IP3 exchange
IP3_ex_29=G*(4*x(142)-(x(132)+x(137)+x(317)+x(632)));

%########################

%% Cell30
% Compartment: id = cytosol, constant
cytosol_30=1.0;

% Compartment: id = ER_store, constant
ER_store_30=1.0;

% Reaction: free receptor; added
V1a_free_30 = k_r(30) * (1-x(150));

% Reaction: id = hormone binding
V1a_bind_30 = k_Hr * H * x(150);

% Reaction: id = non-sp binding
V1a_ns_30 = k_d * x(150);

% Reaction: id = IP3 synth; added
Vip3_prod_30= k_ip3(30) * H * x(150)/(k_cat + x(150));

% Reaction: id = JChannel
JChannel_30=(1-x(149))*(A*(x(147)*0.5)^4/(x(147)*0.5+k1)^4+L)*(x(148)-x(146));

% Reaction: id = JPump
JPump_30=B*(x(146))^2/((x(146))^2+k2^2);

% Reaction: id = kPLC activity
kPLC_30= Vip3_prod_30 *(1-k3/(x(146)+k3)); % NEW

% Reaction: id = kPhosphatase: IP3 degradation
kPhosphatase_30=D*x(147)*0.5;

% Reaction: id = IP3R inhibition
IP3R_inh_30=E*(x(146))^4*(1-x(149));

% Reaction: id = IP3R activation
IP3R_act_30=F;

% Reaction: id = IP3 exchange
IP3_ex_30=G*(5*x(147)-(x(137)+x(222)+x(292)+x(312)+x(647)));

%########################

%% Cell31
% Compartment: id = cytosol, constant
cytosol_31=1.0;

% Compartment: id = ER_store, constant
ER_store_31=1.0;

% Reaction: free receptor; added
V1a_free_31 = k_r(31) * (1-x(155));

% Reaction: id = hormone binding
V1a_bind_31 = k_Hr * H * x(155);

% Reaction: id = non-sp binding
V1a_ns_31 = k_d * x(155);

% Reaction: id = IP3 synth; added
Vip3_prod_31= k_ip3(31) * H * x(155)/(k_cat + x(155));

% Reaction: id = JChannel
JChannel_31=(1-x(154))*(A*(x(152)*0.5)^4/(x(152)*0.5+k1)^4+L)*(x(153)-x(151));

% Reaction: id = JPump
JPump_31=B*(x(151))^2/((x(151))^2+k2^2);

% Reaction: id = kPLC activity
kPLC_31= Vip3_prod_31 *(1-k3/(x(151)+k3)); % NEW

% Reaction: id = kPhosphatase: IP3 degradation
kPhosphatase_31=D*x(152)*0.5;

% Reaction: id = IP3R inhibition
IP3R_inh_31=E*(x(151))^4*(1-x(154));

% Reaction: id = IP3R activation
IP3R_act_31=F;

% Reaction: id = IP3 exchange
IP3_ex_31=G*(3*x(152)-(x(522)+x(527)+x(637)));

%########################

%% Cell32
% Compartment: id = cytosol, constant
cytosol_32=1.0;

% Compartment: id = ER_store, constant
ER_store_32=1.0;

% Reaction: free receptor; added
V1a_free_32 = k_r(32) * (1-x(160));

% Reaction: id = hormone binding
V1a_bind_32 = k_Hr * H * x(160);

% Reaction: id = non-sp binding
V1a_ns_32 = k_d * x(160);

% Reaction: id = IP3 synth; added
Vip3_prod_32= k_ip3(32) * H * x(160)/(k_cat + x(160));

% Reaction: id = JChannel
JChannel_32=(1-x(159))*(A*(x(157)*0.5)^4/(x(157)*0.5+k1)^4+L)*(x(158)-x(156));

% Reaction: id = JPump
JPump_32=B*(x(156))^2/((x(156))^2+k2^2);

% Reaction: id = kPLC activity
kPLC_32= Vip3_prod_32 *(1-k3/(x(156)+k3)); % NEW

% Reaction: id = kPhosphatase: IP3 degradation
kPhosphatase_32=D*x(157)*0.5;

% Reaction: id = IP3R inhibition
IP3R_inh_32=E*(x(156))^4*(1-x(159));

% Reaction: id = IP3R activation
IP3R_act_32=F;

% Reaction: id = IP3 exchange
IP3_ex_32=G*(5*x(157)-(x(227)+x(232)+x(237)+x(642)+x(647)));

%########################

%% Cell33
% Compartment: id = cytosol, constant
cytosol_33=1.0;

% Compartment: id = ER_store, constant
ER_store_33=1.0;

% Reaction: free receptor; added
V1a_free_33 = k_r(33) * (1-x(165));

% Reaction: id = hormone binding
V1a_bind_33 = k_Hr * H * x(165);

% Reaction: id = non-sp binding
V1a_ns_33 = k_d * x(165);

% Reaction: id = IP3 synth; added
Vip3_prod_33= k_ip3(33) * H * x(165)/(k_cat + x(165));

% Reaction: id = JChannel
JChannel_33=(1-x(164))*(A*(x(162)*0.5)^4/(x(162)*0.5+k1)^4+L)*(x(163)-x(161));

% Reaction: id = JPump
JPump_33=B*(x(161))^2/((x(161))^2+k2^2);

% Reaction: id = kPLC activity
kPLC_33= Vip3_prod_33 *(1-k3/(x(161)+k3)); % NEW

% Reaction: id = kPhosphatase: IP3 degradation
kPhosphatase_33=D*x(162)*0.5;

% Reaction: id = IP3R inhibition
IP3R_inh_33=E*(x(161))^4*(1-x(164));

% Reaction: id = IP3R activation
IP3R_act_33=F;

% Reaction: id = IP3 exchange
IP3_ex_33=G*(6*x(162)-(x(87)+x(172)+x(177)+x(182)+x(187)+x(617)));

%########################

%% Cell34
% Compartment: id = cytosol, constant
cytosol_34=1.0;

% Compartment: id = ER_store, constant
ER_store_34=1.0;

% Reaction: free receptor; added
V1a_free_34 = k_r(34) * (1-x(170));

% Reaction: id = hormone binding
V1a_bind_34 = k_Hr * H * x(170);

% Reaction: id = non-sp binding
V1a_ns_34 = k_d * x(170);

% Reaction: id = IP3 synth; added
Vip3_prod_34= k_ip3(34) * H * x(170)/(k_cat + x(170));

% Reaction: id = JChannel
JChannel_34=(1-x(169))*(A*(x(167)*0.5)^4/(x(167)*0.5+k1)^4+L)*(x(168)-x(166));

% Reaction: id = JPump
JPump_34=B*(x(166))^2/((x(166))^2+k2^2);

% Reaction: id = kPLC activity
kPLC_34= Vip3_prod_34 *(1-k3/(x(166)+k3)); % NEW

% Reaction: id = kPhosphatase: IP3 degradation
kPhosphatase_34=D*x(167)*0.5;

% Reaction: id = IP3R inhibition
IP3R_inh_34=E*(x(166))^4*(1-x(169));

% Reaction: id = IP3R activation
IP3R_act_34=F;

% Reaction: id = IP3 exchange
IP3_ex_34=G*(1*x(167)-(x(182)));

%########################

%% Cell35
% Compartment: id = cytosol, constant
cytosol_35=1.0;

% Compartment: id = ER_store, constant
ER_store_35=1.0;

% Reaction: free receptor; added
V1a_free_35 = k_r(35) * (1-x(175));

% Reaction: id = hormone binding
V1a_bind_35 = k_Hr * H * x(175);

% Reaction: id = non-sp binding
V1a_ns_35 = k_d * x(175);

% Reaction: id = IP3 synth; added
Vip3_prod_35= k_ip3(35) * H * x(175)/(k_cat + x(175));

% Reaction: id = JChannel
JChannel_35=(1-x(174))*(A*(x(172)*0.5)^4/(x(172)*0.5+k1)^4+L)*(x(173)-x(171));

% Reaction: id = JPump
JPump_35=B*(x(171))^2/((x(171))^2+k2^2);

% Reaction: id = kPLC activity
kPLC_35= Vip3_prod_35 *(1-k3/(x(171)+k3)); % NEW

% Reaction: id = kPhosphatase: IP3 degradation
kPhosphatase_35=D*x(172)*0.5;

% Reaction: id = IP3R inhibition
IP3R_inh_35=E*(x(171))^4*(1-x(174));

% Reaction: id = IP3R activation
IP3R_act_35=F;

% Reaction: id = IP3 exchange
IP3_ex_35=G*(3*x(172)-(x(162)+x(182)+x(187)));

%########################

%% Cell36
% Compartment: id = cytosol, constant
cytosol_36=1.0;

% Compartment: id = ER_store, constant
ER_store_36=1.0;

% Reaction: free receptor; added
V1a_free_36 = k_r(36) * (1-x(180));

% Reaction: id = hormone binding
V1a_bind_36 = k_Hr * H * x(180);

% Reaction: id = non-sp binding
V1a_ns_36 = k_d * x(180);

% Reaction: id = IP3 synth; added
Vip3_prod_36= k_ip3(36) * H * x(180)/(k_cat + x(180));

% Reaction: id = JChannel
JChannel_36=(1-x(179))*(A*(x(177)*0.5)^4/(x(177)*0.5+k1)^4+L)*(x(178)-x(176));

% Reaction: id = JPump
JPump_36=B*(x(176))^2/((x(176))^2+k2^2);

% Reaction: id = kPLC activity
kPLC_36= Vip3_prod_36 *(1-k3/(x(176)+k3)); % NEW

% Reaction: id = kPhosphatase: IP3 degradation
kPhosphatase_36=D*x(177)*0.5;

% Reaction: id = IP3R inhibition
IP3R_inh_36=E*(x(176))^4*(1-x(179));

% Reaction: id = IP3R activation
IP3R_act_36=F;

% Reaction: id = IP3 exchange
IP3_ex_36=G*(4*x(177)-(x(77)+x(87)+x(162)+x(182)));

%########################

%% Cell37
% Compartment: id = cytosol, constant
cytosol_37=1.0;

% Compartment: id = ER_store, constant
ER_store_37=1.0;

% Reaction: free receptor; added
V1a_free_37 = k_r(37) * (1-x(185));

% Reaction: id = hormone binding
V1a_bind_37 = k_Hr * H * x(185);

% Reaction: id = non-sp binding
V1a_ns_37 = k_d * x(185);

% Reaction: id = IP3 synth; added
Vip3_prod_37= k_ip3(37) * H * x(185)/(k_cat + x(185));

% Reaction: id = JChannel
JChannel_37=(1-x(184))*(A*(x(182)*0.5)^4/(x(182)*0.5+k1)^4+L)*(x(183)-x(181));

% Reaction: id = JPump
JPump_37=B*(x(181))^2/((x(181))^2+k2^2);

% Reaction: id = kPLC activity
kPLC_37= Vip3_prod_37 *(1-k3/(x(181)+k3)); % NEW

% Reaction: id = kPhosphatase: IP3 degradation
kPhosphatase_37=D*x(182)*0.5;

% Reaction: id = IP3R inhibition
IP3R_inh_37=E*(x(181))^4*(1-x(184));

% Reaction: id = IP3R activation
IP3R_act_37=F;

% Reaction: id = IP3 exchange
IP3_ex_37=G*(4*x(182)-(x(162)+x(167)+x(172)+x(177)));

%########################

%% Cell38
% Compartment: id = cytosol, constant
cytosol_38=1.0;

% Compartment: id = ER_store, constant
ER_store_38=1.0;

% Reaction: free receptor; added
V1a_free_38 = k_r(38) * (1-x(190));

% Reaction: id = hormone binding
V1a_bind_38 = k_Hr * H * x(190);

% Reaction: id = non-sp binding
V1a_ns_38 = k_d * x(190);

% Reaction: id = IP3 synth; added
Vip3_prod_38= k_ip3(38) * H * x(190)/(k_cat + x(190));

% Reaction: id = JChannel
JChannel_38=(1-x(189))*(A*(x(187)*0.5)^4/(x(187)*0.5+k1)^4+L)*(x(188)-x(186));

% Reaction: id = JPump
JPump_38=B*(x(186))^2/((x(186))^2+k2^2);

% Reaction: id = kPLC activity
kPLC_38= Vip3_prod_38 *(1-k3/(x(186)+k3)); % NEW

% Reaction: id = kPhosphatase: IP3 degradation
kPhosphatase_38=D*x(187)*0.5;

% Reaction: id = IP3R inhibition
IP3R_inh_38=E*(x(186))^4*(1-x(189));

% Reaction: id = IP3R activation
IP3R_act_38=F;

% Reaction: id = IP3 exchange
IP3_ex_38=G*(4*x(187)-(x(162)+x(172)+x(617)+x(652)));

%########################

%% Cell39
% Compartment: id = cytosol, constant
cytosol_39=1.0;

% Compartment: id = ER_store, constant
ER_store_39=1.0;

% Reaction: free receptor; added
V1a_free_39 = k_r(39) * (1-x(195));

% Reaction: id = hormone binding
V1a_bind_39 = k_Hr * H * x(195);

% Reaction: id = non-sp binding
V1a_ns_39 = k_d * x(195);

% Reaction: id = IP3 synth; added
Vip3_prod_39= k_ip3(39) * H * x(195)/(k_cat + x(195));

% Reaction: id = JChannel
JChannel_39=(1-x(194))*(A*(x(192)*0.5)^4/(x(192)*0.5+k1)^4+L)*(x(193)-x(191));

% Reaction: id = JPump
JPump_39=B*(x(191))^2/((x(191))^2+k2^2);

% Reaction: id = kPLC activity
kPLC_39= Vip3_prod_39 *(1-k3/(x(191)+k3)); % NEW

% Reaction: id = kPhosphatase: IP3 degradation
kPhosphatase_39=D*x(192)*0.5;

% Reaction: id = IP3R inhibition
IP3R_inh_39=E*(x(191))^4*(1-x(194));

% Reaction: id = IP3R activation
IP3R_act_39=F;

% Reaction: id = IP3 exchange
IP3_ex_39=G*(4*x(192)-(x(202)+x(207)+x(657)+x(662)));

%########################

%% Cell40
% Compartment: id = cytosol, constant
cytosol_40=1.0;

% Compartment: id = ER_store, constant
ER_store_40=1.0;

% Reaction: free receptor; added
V1a_free_40 = k_r(40) * (1-x(200));

% Reaction: id = hormone binding
V1a_bind_40 = k_Hr * H * x(200);

% Reaction: id = non-sp binding
V1a_ns_40 = k_d * x(200);

% Reaction: id = IP3 synth; added
Vip3_prod_40= k_ip3(40) * H * x(200)/(k_cat + x(200));

% Reaction: id = JChannel
JChannel_40=(1-x(199))*(A*(x(197)*0.5)^4/(x(197)*0.5+k1)^4+L)*(x(198)-x(196));

% Reaction: id = JPump
JPump_40=B*(x(196))^2/((x(196))^2+k2^2);

% Reaction: id = kPLC activity
kPLC_40= Vip3_prod_40 *(1-k3/(x(196)+k3)); % NEW

% Reaction: id = kPhosphatase: IP3 degradation
kPhosphatase_40=D*x(197)*0.5;

% Reaction: id = IP3R inhibition
IP3R_inh_40=E*(x(196))^4*(1-x(199));

% Reaction: id = IP3R activation
IP3R_act_40=F;

% Reaction: id = IP3 exchange
IP3_ex_40=G*(3*x(197)-(x(422)+x(652)+x(657)));

%########################

%% Cell41
% Compartment: id = cytosol, constant
cytosol_41=1.0;

% Compartment: id = ER_store, constant
ER_store_41=1.0;

% Reaction: free receptor; added
V1a_free_41 = k_r(41) * (1-x(205));

% Reaction: id = hormone binding
V1a_bind_41 = k_Hr * H * x(205);

% Reaction: id = non-sp binding
V1a_ns_41 = k_d * x(205);

% Reaction: id = IP3 synth; added
Vip3_prod_41= k_ip3(41) * H * x(205)/(k_cat + x(205));

% Reaction: id = JChannel
JChannel_41=(1-x(204))*(A*(x(202)*0.5)^4/(x(202)*0.5+k1)^4+L)*(x(203)-x(201));

% Reaction: id = JPump
JPump_41=B*(x(201))^2/((x(201))^2+k2^2);

% Reaction: id = kPLC activity
kPLC_41= Vip3_prod_41 *(1-k3/(x(201)+k3)); % NEW

% Reaction: id = kPhosphatase: IP3 degradation
kPhosphatase_41=D*x(202)*0.5;

% Reaction: id = IP3R inhibition
IP3R_inh_41=E*(x(201))^4*(1-x(204));

% Reaction: id = IP3R activation
IP3R_act_41=F;

% Reaction: id = IP3 exchange
IP3_ex_41=G*(4*x(202)-(x(192)+x(207)+x(657)+x(662)));

%########################

%% Cell42
% Compartment: id = cytosol, constant
cytosol_42=1.0;

% Compartment: id = ER_store, constant
ER_store_42=1.0;

% Reaction: free receptor; added
V1a_free_42 = k_r(42) * (1-x(210));

% Reaction: id = hormone binding
V1a_bind_42 = k_Hr * H * x(210);

% Reaction: id = non-sp binding
V1a_ns_42 = k_d * x(210);

% Reaction: id = IP3 synth; added
Vip3_prod_42= k_ip3(42) * H * x(210)/(k_cat + x(210));

% Reaction: id = JChannel
JChannel_42=(1-x(209))*(A*(x(207)*0.5)^4/(x(207)*0.5+k1)^4+L)*(x(208)-x(206));

% Reaction: id = JPump
JPump_42=B*(x(206))^2/((x(206))^2+k2^2);

% Reaction: id = kPLC activity
kPLC_42= Vip3_prod_42 *(1-k3/(x(206)+k3)); % NEW

% Reaction: id = kPhosphatase: IP3 degradation
kPhosphatase_42=D*x(207)*0.5;

% Reaction: id = IP3R inhibition
IP3R_inh_42=E*(x(206))^4*(1-x(209));

% Reaction: id = IP3R activation
IP3R_act_42=F;

% Reaction: id = IP3 exchange
IP3_ex_42=G*(6*x(207)-(x(192)+x(202)+x(212)+x(422)+x(657)+x(662)));

%########################

%% Cell43
% Compartment: id = cytosol, constant
cytosol_43=1.0;

% Compartment: id = ER_store, constant
ER_store_43=1.0;

% Reaction: free receptor; added
V1a_free_43 = k_r(43) * (1-x(215));

% Reaction: id = hormone binding
V1a_bind_43 = k_Hr * H * x(215);

% Reaction: id = non-sp binding
V1a_ns_43 = k_d * x(215);

% Reaction: id = IP3 synth; added
Vip3_prod_43= k_ip3(43) * H * x(215)/(k_cat + x(215));

% Reaction: id = JChannel
JChannel_43=(1-x(214))*(A*(x(212)*0.5)^4/(x(212)*0.5+k1)^4+L)*(x(213)-x(211));

% Reaction: id = JPump
JPump_43=B*(x(211))^2/((x(211))^2+k2^2);

% Reaction: id = kPLC activity
kPLC_43= Vip3_prod_43 *(1-k3/(x(211)+k3)); % NEW

% Reaction: id = kPhosphatase: IP3 degradation
kPhosphatase_43=D*x(212)*0.5;

% Reaction: id = IP3R inhibition
IP3R_inh_43=E*(x(211))^4*(1-x(214));

% Reaction: id = IP3R activation
IP3R_act_43=F;

% Reaction: id = IP3 exchange
IP3_ex_43=G*(6*x(212)-(x(207)+x(327)+x(332)+x(337)+x(342)+x(662)));

%########################

%% Cell44
% Compartment: id = cytosol, constant
cytosol_44=1.0;

% Compartment: id = ER_store, constant
ER_store_44=1.0;

% Reaction: free receptor; added
V1a_free_44 = k_r(44) * (1-x(220));

% Reaction: id = hormone binding
V1a_bind_44 = k_Hr * H * x(220);

% Reaction: id = non-sp binding
V1a_ns_44 = k_d * x(220);

% Reaction: id = IP3 synth; added
Vip3_prod_44= k_ip3(44) * H * x(220)/(k_cat + x(220));

% Reaction: id = JChannel
JChannel_44=(1-x(219))*(A*(x(217)*0.5)^4/(x(217)*0.5+k1)^4+L)*(x(218)-x(216));

% Reaction: id = JPump
JPump_44=B*(x(216))^2/((x(216))^2+k2^2);

% Reaction: id = kPLC activity
kPLC_44= Vip3_prod_44 *(1-k3/(x(216)+k3)); % NEW

% Reaction: id = kPhosphatase: IP3 degradation
kPhosphatase_44=D*x(217)*0.5;

% Reaction: id = IP3R inhibition
IP3R_inh_44=E*(x(216))^4*(1-x(219));

% Reaction: id = IP3R activation
IP3R_act_44=F;

% Reaction: id = IP3 exchange
IP3_ex_44=G*(4*x(217)-(x(107)+x(112)+x(132)+x(632)));

%########################

%% Cell45
% Compartment: id = cytosol, constant
cytosol_45=1.0;

% Compartment: id = ER_store, constant
ER_store_45=1.0;

% Reaction: free receptor; added
V1a_free_45 = k_r(45) * (1-x(225));

% Reaction: id = hormone binding
V1a_bind_45 = k_Hr * H * x(225);

% Reaction: id = non-sp binding
V1a_ns_45 = k_d * x(225);

% Reaction: id = IP3 synth; added
Vip3_prod_45= k_ip3(45) * H * x(225)/(k_cat + x(225));

% Reaction: id = JChannel
JChannel_45=(1-x(224))*(A*(x(222)*0.5)^4/(x(222)*0.5+k1)^4+L)*(x(223)-x(221));

% Reaction: id = JPump
JPump_45=B*(x(221))^2/((x(221))^2+k2^2);

% Reaction: id = kPLC activity
kPLC_45= Vip3_prod_45 *(1-k3/(x(221)+k3)); % NEW

% Reaction: id = kPhosphatase: IP3 degradation
kPhosphatase_45=D*x(222)*0.5;

% Reaction: id = IP3R inhibition
IP3R_inh_45=E*(x(221))^4*(1-x(224));

% Reaction: id = IP3R activation
IP3R_act_45=F;

% Reaction: id = IP3 exchange
IP3_ex_45=G*(5*x(222)-(x(147)+x(227)+x(287)+x(292)+x(647)));

%########################

%% Cell46
% Compartment: id = cytosol, constant
cytosol_46=1.0;

% Compartment: id = ER_store, constant
ER_store_46=1.0;

% Reaction: free receptor; added
V1a_free_46 = k_r(46) * (1-x(230));

% Reaction: id = hormone binding
V1a_bind_46 = k_Hr * H * x(230);

% Reaction: id = non-sp binding
V1a_ns_46 = k_d * x(230);

% Reaction: id = IP3 synth; added
Vip3_prod_46= k_ip3(46) * H * x(230)/(k_cat + x(230));

% Reaction: id = JChannel
JChannel_46=(1-x(229))*(A*(x(227)*0.5)^4/(x(227)*0.5+k1)^4+L)*(x(228)-x(226));

% Reaction: id = JPump
JPump_46=B*(x(226))^2/((x(226))^2+k2^2);

% Reaction: id = kPLC activity
kPLC_46= Vip3_prod_46 *(1-k3/(x(226)+k3)); % NEW

% Reaction: id = kPhosphatase: IP3 degradation
kPhosphatase_46=D*x(227)*0.5;

% Reaction: id = IP3R inhibition
IP3R_inh_46=E*(x(226))^4*(1-x(229));

% Reaction: id = IP3R activation
IP3R_act_46=F;

% Reaction: id = IP3 exchange
IP3_ex_46=G*(5*x(227)-(x(157)+x(222)+x(237)+x(287)+x(647)));

%########################

%% Cell47
% Compartment: id = cytosol, constant
cytosol_47=1.0;

% Compartment: id = ER_store, constant
ER_store_47=1.0;

% Reaction: free receptor; added
V1a_free_47 = k_r(47) * (1-x(235));

% Reaction: id = hormone binding
V1a_bind_47 = k_Hr * H * x(235);

% Reaction: id = non-sp binding
V1a_ns_47 = k_d * x(235);

% Reaction: id = IP3 synth; added
Vip3_prod_47= k_ip3(47) * H * x(235)/(k_cat + x(235));

% Reaction: id = JChannel
JChannel_47=(1-x(234))*(A*(x(232)*0.5)^4/(x(232)*0.5+k1)^4+L)*(x(233)-x(231));

% Reaction: id = JPump
JPump_47=B*(x(231))^2/((x(231))^2+k2^2);

% Reaction: id = kPLC activity
kPLC_47= Vip3_prod_47 *(1-k3/(x(231)+k3)); % NEW

% Reaction: id = kPhosphatase: IP3 degradation
kPhosphatase_47=D*x(232)*0.5;

% Reaction: id = IP3R inhibition
IP3R_inh_47=E*(x(231))^4*(1-x(234));

% Reaction: id = IP3R activation
IP3R_act_47=F;

% Reaction: id = IP3 exchange
IP3_ex_47=G*(3*x(232)-(x(157)+x(237)+x(242)));

%########################

%% Cell48
% Compartment: id = cytosol, constant
cytosol_48=1.0;

% Compartment: id = ER_store, constant
ER_store_48=1.0;

% Reaction: free receptor; added
V1a_free_48 = k_r(48) * (1-x(240));

% Reaction: id = hormone binding
V1a_bind_48 = k_Hr * H * x(240);

% Reaction: id = non-sp binding
V1a_ns_48 = k_d * x(240);

% Reaction: id = IP3 synth; added
Vip3_prod_48= k_ip3(48) * H * x(240)/(k_cat + x(240));

% Reaction: id = JChannel
JChannel_48=(1-x(239))*(A*(x(237)*0.5)^4/(x(237)*0.5+k1)^4+L)*(x(238)-x(236));

% Reaction: id = JPump
JPump_48=B*(x(236))^2/((x(236))^2+k2^2);

% Reaction: id = kPLC activity
kPLC_48= Vip3_prod_48 *(1-k3/(x(236)+k3)); % NEW

% Reaction: id = kPhosphatase: IP3 degradation
kPhosphatase_48=D*x(237)*0.5;

% Reaction: id = IP3R inhibition
IP3R_inh_48=E*(x(236))^4*(1-x(239));

% Reaction: id = IP3R activation
IP3R_act_48=F;

% Reaction: id = IP3 exchange
IP3_ex_48=G*(5*x(237)-(x(157)+x(227)+x(232)+x(242)+x(247)));

%########################

%% Cell49
% Compartment: id = cytosol, constant
cytosol_49=1.0;

% Compartment: id = ER_store, constant
ER_store_49=1.0;

% Reaction: free receptor; added
V1a_free_49 = k_r(49) * (1-x(245));

% Reaction: id = hormone binding
V1a_bind_49 = k_Hr * H * x(245);

% Reaction: id = non-sp binding
V1a_ns_49 = k_d * x(245);

% Reaction: id = IP3 synth; added
Vip3_prod_49= k_ip3(49) * H * x(245)/(k_cat + x(245));

% Reaction: id = JChannel
JChannel_49=(1-x(244))*(A*(x(242)*0.5)^4/(x(242)*0.5+k1)^4+L)*(x(243)-x(241));

% Reaction: id = JPump
JPump_49=B*(x(241))^2/((x(241))^2+k2^2);

% Reaction: id = kPLC activity
kPLC_49= Vip3_prod_49 *(1-k3/(x(241)+k3)); % NEW

% Reaction: id = kPhosphatase: IP3 degradation
kPhosphatase_49=D*x(242)*0.5;

% Reaction: id = IP3R inhibition
IP3R_inh_49=E*(x(241))^4*(1-x(244));

% Reaction: id = IP3R activation
IP3R_act_49=F;

% Reaction: id = IP3 exchange
IP3_ex_49=G*(4*x(242)-(x(232)+x(237)+x(247)+x(507)));

%########################

%% Cell50
% Compartment: id = cytosol, constant
cytosol_50=1.0;

% Compartment: id = ER_store, constant
ER_store_50=1.0;

% Reaction: free receptor; added
V1a_free_50 = k_r(50) * (1-x(250));

% Reaction: id = hormone binding
V1a_bind_50 = k_Hr * H * x(250);

% Reaction: id = non-sp binding
V1a_ns_50 = k_d * x(250);

% Reaction: id = IP3 synth; added
Vip3_prod_50= k_ip3(50) * H * x(250)/(k_cat + x(250));

% Reaction: id = JChannel
JChannel_50=(1-x(249))*(A*(x(247)*0.5)^4/(x(247)*0.5+k1)^4+L)*(x(248)-x(246));

% Reaction: id = JPump
JPump_50=B*(x(246))^2/((x(246))^2+k2^2);

% Reaction: id = kPLC activity
kPLC_50= Vip3_prod_50 *(1-k3/(x(246)+k3)); % NEW

% Reaction: id = kPhosphatase: IP3 degradation
kPhosphatase_50=D*x(247)*0.5;

% Reaction: id = IP3R inhibition
IP3R_inh_50=E*(x(246))^4*(1-x(249));

% Reaction: id = IP3R activation
IP3R_act_50=F;

% Reaction: id = IP3 exchange
IP3_ex_50=G*(6*x(247)-(x(237)+x(242)+x(262)+x(277)+x(282)+x(507)));

%########################

%% Cell51
% Compartment: id = cytosol, constant
cytosol_51=1.0;

% Compartment: id = ER_store, constant
ER_store_51=1.0;

% Reaction: free receptor; added
V1a_free_51 = k_r(51) * (1-x(255));

% Reaction: id = hormone binding
V1a_bind_51 = k_Hr * H * x(255);

% Reaction: id = non-sp binding
V1a_ns_51 = k_d * x(255);

% Reaction: id = IP3 synth; added
Vip3_prod_51= k_ip3(51) * H * x(255)/(k_cat + x(255));

% Reaction: id = JChannel
JChannel_51=(1-x(254))*(A*(x(252)*0.5)^4/(x(252)*0.5+k1)^4+L)*(x(253)-x(251));

% Reaction: id = JPump
JPump_51=B*(x(251))^2/((x(251))^2+k2^2);

% Reaction: id = kPLC activity
kPLC_51= Vip3_prod_51 *(1-k3/(x(251)+k3)); % NEW

% Reaction: id = kPhosphatase: IP3 degradation
kPhosphatase_51=D*x(252)*0.5;

% Reaction: id = IP3R inhibition
IP3R_inh_51=E*(x(251))^4*(1-x(254));

% Reaction: id = IP3R activation
IP3R_act_51=F;

% Reaction: id = IP3 exchange
IP3_ex_51=G*(4*x(252)-(x(257)+x(267)+x(507)+x(667)));

%########################

%% Cell52
% Compartment: id = cytosol, constant
cytosol_52=1.0;

% Compartment: id = ER_store, constant
ER_store_52=1.0;

% Reaction: free receptor; added
V1a_free_52 = k_r(52) * (1-x(260));

% Reaction: id = hormone binding
V1a_bind_52 = k_Hr * H * x(260);

% Reaction: id = non-sp binding
V1a_ns_52 = k_d * x(260);

% Reaction: id = IP3 synth; added
Vip3_prod_52= k_ip3(52) * H * x(260)/(k_cat + x(260));

% Reaction: id = JChannel
JChannel_52=(1-x(259))*(A*(x(257)*0.5)^4/(x(257)*0.5+k1)^4+L)*(x(258)-x(256));

% Reaction: id = JPump
JPump_52=B*(x(256))^2/((x(256))^2+k2^2);

% Reaction: id = kPLC activity
kPLC_52= Vip3_prod_52 *(1-k3/(x(256)+k3)); % NEW

% Reaction: id = kPhosphatase: IP3 degradation
kPhosphatase_52=D*x(257)*0.5;

% Reaction: id = IP3R inhibition
IP3R_inh_52=E*(x(256))^4*(1-x(259));

% Reaction: id = IP3R activation
IP3R_act_52=F;

% Reaction: id = IP3 exchange
IP3_ex_52=G*(4*x(257)-(x(252)+x(262)+x(282)+x(507)));

%########################

%% Cell53
% Compartment: id = cytosol, constant
cytosol_53=1.0;

% Compartment: id = ER_store, constant
ER_store_53=1.0;

% Reaction: free receptor; added
V1a_free_53 = k_r(53) * (1-x(265));

% Reaction: id = hormone binding
V1a_bind_53 = k_Hr * H * x(265);

% Reaction: id = non-sp binding
V1a_ns_53 = k_d * x(265);

% Reaction: id = IP3 synth; added
Vip3_prod_53= k_ip3(53) * H * x(265)/(k_cat + x(265));

% Reaction: id = JChannel
JChannel_53=(1-x(264))*(A*(x(262)*0.5)^4/(x(262)*0.5+k1)^4+L)*(x(263)-x(261));

% Reaction: id = JPump
JPump_53=B*(x(261))^2/((x(261))^2+k2^2);

% Reaction: id = kPLC activity
kPLC_53= Vip3_prod_53 *(1-k3/(x(261)+k3)); % NEW

% Reaction: id = kPhosphatase: IP3 degradation
kPhosphatase_53=D*x(262)*0.5;

% Reaction: id = IP3R inhibition
IP3R_inh_53=E*(x(261))^4*(1-x(264));

% Reaction: id = IP3R activation
IP3R_act_53=F;

% Reaction: id = IP3 exchange
IP3_ex_53=G*(5*x(262)-(x(247)+x(257)+x(277)+x(282)+x(507)));

%########################

%% Cell54
% Compartment: id = cytosol, constant
cytosol_54=1.0;

% Compartment: id = ER_store, constant
ER_store_54=1.0;

% Reaction: free receptor; added
V1a_free_54 = k_r(54) * (1-x(270));

% Reaction: id = hormone binding
V1a_bind_54 = k_Hr * H * x(270);

% Reaction: id = non-sp binding
V1a_ns_54 = k_d * x(270);

% Reaction: id = IP3 synth; added
Vip3_prod_54= k_ip3(54) * H * x(270)/(k_cat + x(270));

% Reaction: id = JChannel
JChannel_54=(1-x(269))*(A*(x(267)*0.5)^4/(x(267)*0.5+k1)^4+L)*(x(268)-x(266));

% Reaction: id = JPump
JPump_54=B*(x(266))^2/((x(266))^2+k2^2);

% Reaction: id = kPLC activity
kPLC_54= Vip3_prod_54 *(1-k3/(x(266)+k3)); % NEW

% Reaction: id = kPhosphatase: IP3 degradation
kPhosphatase_54=D*x(267)*0.5;

% Reaction: id = IP3R inhibition
IP3R_inh_54=E*(x(266))^4*(1-x(269));

% Reaction: id = IP3R activation
IP3R_act_54=F;

% Reaction: id = IP3 exchange
IP3_ex_54=G*(5*x(267)-(x(252)+x(492)+x(497)+x(502)+x(507)));

%########################

%% Cell55
% Compartment: id = cytosol, constant
cytosol_55=1.0;

% Compartment: id = ER_store, constant
ER_store_55=1.0;

% Reaction: free receptor; added
V1a_free_55 = k_r(55) * (1-x(275));

% Reaction: id = hormone binding
V1a_bind_55 = k_Hr * H * x(275);

% Reaction: id = non-sp binding
V1a_ns_55 = k_d * x(275);

% Reaction: id = IP3 synth; added
Vip3_prod_55= k_ip3(55) * H * x(275)/(k_cat + x(275));

% Reaction: id = JChannel
JChannel_55=(1-x(274))*(A*(x(272)*0.5)^4/(x(272)*0.5+k1)^4+L)*(x(273)-x(271));

% Reaction: id = JPump
JPump_55=B*(x(271))^2/((x(271))^2+k2^2);

% Reaction: id = kPLC activity
kPLC_55= Vip3_prod_55 *(1-k3/(x(271)+k3)); % NEW

% Reaction: id = kPhosphatase: IP3 degradation
kPhosphatase_55=D*x(272)*0.5;

% Reaction: id = IP3R inhibition
IP3R_inh_55=E*(x(271))^4*(1-x(274));

% Reaction: id = IP3R activation
IP3R_act_55=F;

% Reaction: id = IP3 exchange
IP3_ex_55=G*(3*x(272)-(x(282)+x(667)+x(672)));

%########################

%% Cell56
% Compartment: id = cytosol, constant
cytosol_56=1.0;

% Compartment: id = ER_store, constant
ER_store_56=1.0;

% Reaction: free receptor; added
V1a_free_56 = k_r(56) * (1-x(280));

% Reaction: id = hormone binding
V1a_bind_56 = k_Hr * H * x(280);

% Reaction: id = non-sp binding
V1a_ns_56 = k_d * x(280);

% Reaction: id = IP3 synth; added
Vip3_prod_56= k_ip3(56) * H * x(280)/(k_cat + x(280));

% Reaction: id = JChannel
JChannel_56=(1-x(279))*(A*(x(277)*0.5)^4/(x(277)*0.5+k1)^4+L)*(x(278)-x(276));

% Reaction: id = JPump
JPump_56=B*(x(276))^2/((x(276))^2+k2^2);

% Reaction: id = kPLC activity
kPLC_56= Vip3_prod_56 *(1-k3/(x(276)+k3)); % NEW

% Reaction: id = kPhosphatase: IP3 degradation
kPhosphatase_56=D*x(277)*0.5;

% Reaction: id = IP3R inhibition
IP3R_inh_56=E*(x(276))^4*(1-x(279));

% Reaction: id = IP3R activation
IP3R_act_56=F;

% Reaction: id = IP3 exchange
IP3_ex_56=G*(4*x(277)-(x(247)+x(262)+x(282)+x(397)));

%########################

%% Cell57
% Compartment: id = cytosol, constant
cytosol_57=1.0;

% Compartment: id = ER_store, constant
ER_store_57=1.0;

% Reaction: free receptor; added
V1a_free_57 = k_r(57) * (1-x(285));

% Reaction: id = hormone binding
V1a_bind_57 = k_Hr * H * x(285);

% Reaction: id = non-sp binding
V1a_ns_57 = k_d * x(285);

% Reaction: id = IP3 synth; added
Vip3_prod_57= k_ip3(57) * H * x(285)/(k_cat + x(285));

% Reaction: id = JChannel
JChannel_57=(1-x(284))*(A*(x(282)*0.5)^4/(x(282)*0.5+k1)^4+L)*(x(283)-x(281));

% Reaction: id = JPump
JPump_57=B*(x(281))^2/((x(281))^2+k2^2);

% Reaction: id = kPLC activity
kPLC_57= Vip3_prod_57 *(1-k3/(x(281)+k3)); % NEW

% Reaction: id = kPhosphatase: IP3 degradation
kPhosphatase_57=D*x(282)*0.5;

% Reaction: id = IP3R inhibition
IP3R_inh_57=E*(x(281))^4*(1-x(284));

% Reaction: id = IP3R activation
IP3R_act_57=F;

% Reaction: id = IP3 exchange
IP3_ex_57=G*(6*x(282)-(x(247)+x(257)+x(262)+x(272)+x(277)+x(672)));

%########################

%% Cell58
% Compartment: id = cytosol, constant
cytosol_58=1.0;

% Compartment: id = ER_store, constant
ER_store_58=1.0;

% Reaction: free receptor; added
V1a_free_58 = k_r(58) * (1-x(290));

% Reaction: id = hormone binding
V1a_bind_58 = k_Hr * H * x(290);

% Reaction: id = non-sp binding
V1a_ns_58 = k_d * x(290);

% Reaction: id = IP3 synth; added
Vip3_prod_58= k_ip3(58) * H * x(290)/(k_cat + x(290));

% Reaction: id = JChannel
JChannel_58=(1-x(289))*(A*(x(287)*0.5)^4/(x(287)*0.5+k1)^4+L)*(x(288)-x(286));

% Reaction: id = JPump
JPump_58=B*(x(286))^2/((x(286))^2+k2^2);

% Reaction: id = kPLC activity
kPLC_58= Vip3_prod_58 *(1-k3/(x(286)+k3)); % NEW

% Reaction: id = kPhosphatase: IP3 degradation
kPhosphatase_58=D*x(287)*0.5;

% Reaction: id = IP3R inhibition
IP3R_inh_58=E*(x(286))^4*(1-x(289));

% Reaction: id = IP3R activation
IP3R_act_58=F;

% Reaction: id = IP3 exchange
IP3_ex_58=G*(4*x(287)-(x(222)+x(227)+x(292)+x(307)));

%########################

%% Cell59
% Compartment: id = cytosol, constant
cytosol_59=1.0;

% Compartment: id = ER_store, constant
ER_store_59=1.0;

% Reaction: free receptor; added
V1a_free_59 = k_r(59) * (1-x(295));

% Reaction: id = hormone binding
V1a_bind_59 = k_Hr * H * x(295);

% Reaction: id = non-sp binding
V1a_ns_59 = k_d * x(295);

% Reaction: id = IP3 synth; added
Vip3_prod_59= k_ip3(59) * H * x(295)/(k_cat + x(295));

% Reaction: id = JChannel
JChannel_59=(1-x(294))*(A*(x(292)*0.5)^4/(x(292)*0.5+k1)^4+L)*(x(293)-x(291));

% Reaction: id = JPump
JPump_59=B*(x(291))^2/((x(291))^2+k2^2);

% Reaction: id = kPLC activity
kPLC_59= Vip3_prod_59 *(1-k3/(x(291)+k3)); % NEW

% Reaction: id = kPhosphatase: IP3 degradation
kPhosphatase_59=D*x(292)*0.5;

% Reaction: id = IP3R inhibition
IP3R_inh_59=E*(x(291))^4*(1-x(294));

% Reaction: id = IP3R activation
IP3R_act_59=F;

% Reaction: id = IP3 exchange
IP3_ex_59=G*(5*x(292)-(x(147)+x(222)+x(287)+x(302)+x(312)));

%########################

%% Cell60
% Compartment: id = cytosol, constant
cytosol_60=1.0;

% Compartment: id = ER_store, constant
ER_store_60=1.0;

% Reaction: free receptor; added
V1a_free_60 = k_r(60) * (1-x(300));

% Reaction: id = hormone binding
V1a_bind_60 = k_Hr * H * x(300);

% Reaction: id = non-sp binding
V1a_ns_60 = k_d * x(300);

% Reaction: id = IP3 synth; added
Vip3_prod_60= k_ip3(60) * H * x(300)/(k_cat + x(300));

% Reaction: id = JChannel
JChannel_60=(1-x(299))*(A*(x(297)*0.5)^4/(x(297)*0.5+k1)^4+L)*(x(298)-x(296));

% Reaction: id = JPump
JPump_60=B*(x(296))^2/((x(296))^2+k2^2);

% Reaction: id = kPLC activity
kPLC_60= Vip3_prod_60 *(1-k3/(x(296)+k3)); % NEW

% Reaction: id = kPhosphatase: IP3 degradation
kPhosphatase_60=D*x(297)*0.5;

% Reaction: id = IP3R inhibition
IP3R_inh_60=E*(x(296))^4*(1-x(299));

% Reaction: id = IP3R activation
IP3R_act_60=F;

% Reaction: id = IP3 exchange
IP3_ex_60=G*(5*x(297)-(x(302)+x(312)+x(347)+x(352)+x(362)));

%########################

%% Cell61
% Compartment: id = cytosol, constant
cytosol_61=1.0;

% Compartment: id = ER_store, constant
ER_store_61=1.0;

% Reaction: free receptor; added
V1a_free_61 = k_r(61) * (1-x(305));

% Reaction: id = hormone binding
V1a_bind_61 = k_Hr * H * x(305);

% Reaction: id = non-sp binding
V1a_ns_61 = k_d * x(305);

% Reaction: id = IP3 synth; added
Vip3_prod_61= k_ip3(61) * H * x(305)/(k_cat + x(305));

% Reaction: id = JChannel
JChannel_61=(1-x(304))*(A*(x(302)*0.5)^4/(x(302)*0.5+k1)^4+L)*(x(303)-x(301));

% Reaction: id = JPump
JPump_61=B*(x(301))^2/((x(301))^2+k2^2);

% Reaction: id = kPLC activity
kPLC_61= Vip3_prod_61 *(1-k3/(x(301)+k3)); % NEW

% Reaction: id = kPhosphatase: IP3 degradation
kPhosphatase_61=D*x(302)*0.5;

% Reaction: id = IP3R inhibition
IP3R_inh_61=E*(x(301))^4*(1-x(304));

% Reaction: id = IP3R activation
IP3R_act_61=F;

% Reaction: id = IP3 exchange
IP3_ex_61=G*(4*x(302)-(x(292)+x(297)+x(307)+x(367)));

%########################

%% Cell62
% Compartment: id = cytosol, constant
cytosol_62=1.0;

% Compartment: id = ER_store, constant
ER_store_62=1.0;

% Reaction: free receptor; added
V1a_free_62 = k_r(62) * (1-x(310));

% Reaction: id = hormone binding
V1a_bind_62 = k_Hr * H * x(310);

% Reaction: id = non-sp binding
V1a_ns_62 = k_d * x(310);

% Reaction: id = IP3 synth; added
Vip3_prod_62= k_ip3(62) * H * x(310)/(k_cat + x(310));

% Reaction: id = JChannel
JChannel_62=(1-x(309))*(A*(x(307)*0.5)^4/(x(307)*0.5+k1)^4+L)*(x(308)-x(306));

% Reaction: id = JPump
JPump_62=B*(x(306))^2/((x(306))^2+k2^2);

% Reaction: id = kPLC activity
kPLC_62= Vip3_prod_62 *(1-k3/(x(306)+k3)); % NEW

% Reaction: id = kPhosphatase: IP3 degradation
kPhosphatase_62=D*x(307)*0.5;

% Reaction: id = IP3R inhibition
IP3R_inh_62=E*(x(306))^4*(1-x(309));

% Reaction: id = IP3R activation
IP3R_act_62=F;

% Reaction: id = IP3 exchange
IP3_ex_62=G*(4*x(307)-(x(287)+x(302)+x(367)+x(372)));

%########################

%% Cell63
% Compartment: id = cytosol, constant
cytosol_63=1.0;

% Compartment: id = ER_store, constant
ER_store_63=1.0;

% Reaction: free receptor; added
V1a_free_63 = k_r(63) * (1-x(315));

% Reaction: id = hormone binding
V1a_bind_63 = k_Hr * H * x(315);

% Reaction: id = non-sp binding
V1a_ns_63 = k_d * x(315);

% Reaction: id = IP3 synth; added
Vip3_prod_63= k_ip3(63) * H * x(315)/(k_cat + x(315));

% Reaction: id = JChannel
JChannel_63=(1-x(314))*(A*(x(312)*0.5)^4/(x(312)*0.5+k1)^4+L)*(x(313)-x(311));

% Reaction: id = JPump
JPump_63=B*(x(311))^2/((x(311))^2+k2^2);

% Reaction: id = kPLC activity
kPLC_63= Vip3_prod_63 *(1-k3/(x(311)+k3)); % NEW

% Reaction: id = kPhosphatase: IP3 degradation
kPhosphatase_63=D*x(312)*0.5;

% Reaction: id = IP3R inhibition
IP3R_inh_63=E*(x(311))^4*(1-x(314));

% Reaction: id = IP3R activation
IP3R_act_63=F;

% Reaction: id = IP3 exchange
IP3_ex_63=G*(4*x(312)-(x(147)+x(292)+x(297)+x(317)));

%########################

%% Cell64
% Compartment: id = cytosol, constant
cytosol_64=1.0;

% Compartment: id = ER_store, constant
ER_store_64=1.0;

% Reaction: free receptor; added
V1a_free_64 = k_r(64) * (1-x(320));

% Reaction: id = hormone binding
V1a_bind_64 = k_Hr * H * x(320);

% Reaction: id = non-sp binding
V1a_ns_64 = k_d * x(320);

% Reaction: id = IP3 synth; added
Vip3_prod_64= k_ip3(64) * H * x(320)/(k_cat + x(320));

% Reaction: id = JChannel
JChannel_64=(1-x(319))*(A*(x(317)*0.5)^4/(x(317)*0.5+k1)^4+L)*(x(318)-x(316));

% Reaction: id = JPump
JPump_64=B*(x(316))^2/((x(316))^2+k2^2);

% Reaction: id = kPLC activity
kPLC_64= Vip3_prod_64 *(1-k3/(x(316)+k3)); % NEW

% Reaction: id = kPhosphatase: IP3 degradation
kPhosphatase_64=D*x(317)*0.5;

% Reaction: id = IP3R inhibition
IP3R_inh_64=E*(x(316))^4*(1-x(319));

% Reaction: id = IP3R activation
IP3R_act_64=F;

% Reaction: id = IP3 exchange
IP3_ex_64=G*(4*x(317)-(x(142)+x(312)+x(322)+x(632)));

%########################

%% Cell65
% Compartment: id = cytosol, constant
cytosol_65=1.0;

% Compartment: id = ER_store, constant
ER_store_65=1.0;

% Reaction: free receptor; added
V1a_free_65 = k_r(65) * (1-x(325));

% Reaction: id = hormone binding
V1a_bind_65 = k_Hr * H * x(325);

% Reaction: id = non-sp binding
V1a_ns_65 = k_d * x(325);

% Reaction: id = IP3 synth; added
Vip3_prod_65= k_ip3(65) * H * x(325)/(k_cat + x(325));

% Reaction: id = JChannel
JChannel_65=(1-x(324))*(A*(x(322)*0.5)^4/(x(322)*0.5+k1)^4+L)*(x(323)-x(321));

% Reaction: id = JPump
JPump_65=B*(x(321))^2/((x(321))^2+k2^2);

% Reaction: id = kPLC activity
kPLC_65= Vip3_prod_65 *(1-k3/(x(321)+k3)); % NEW

% Reaction: id = kPhosphatase: IP3 degradation
kPhosphatase_65=D*x(322)*0.5;

% Reaction: id = IP3R inhibition
IP3R_inh_65=E*(x(321))^4*(1-x(324));

% Reaction: id = IP3R activation
IP3R_act_65=F;

% Reaction: id = IP3 exchange
IP3_ex_65=G*(4*x(322)-(x(317)+x(342)+x(347)+x(677)));

%########################

%% Cell66
% Compartment: id = cytosol, constant
cytosol_66=1.0;

% Compartment: id = ER_store, constant
ER_store_66=1.0;

% Reaction: free receptor; added
V1a_free_66 = k_r(66) * (1-x(330));

% Reaction: id = hormone binding
V1a_bind_66 = k_Hr * H * x(330);

% Reaction: id = non-sp binding
V1a_ns_66 = k_d * x(330);

% Reaction: id = IP3 synth; added
Vip3_prod_66= k_ip3(66) * H * x(330)/(k_cat + x(330));

% Reaction: id = JChannel
JChannel_66=(1-x(329))*(A*(x(327)*0.5)^4/(x(327)*0.5+k1)^4+L)*(x(328)-x(326));

% Reaction: id = JPump
JPump_66=B*(x(326))^2/((x(326))^2+k2^2);

% Reaction: id = kPLC activity
kPLC_66= Vip3_prod_66 *(1-k3/(x(326)+k3)); % NEW

% Reaction: id = kPhosphatase: IP3 degradation
kPhosphatase_66=D*x(327)*0.5;

% Reaction: id = IP3R inhibition
IP3R_inh_66=E*(x(326))^4*(1-x(329));

% Reaction: id = IP3R activation
IP3R_act_66=F;

% Reaction: id = IP3 exchange
IP3_ex_66=G*(5*x(327)-(x(212)+x(332)+x(342)+x(347)+x(677)));

%########################

%% Cell67
% Compartment: id = cytosol, constant
cytosol_67=1.0;

% Compartment: id = ER_store, constant
ER_store_67=1.0;

% Reaction: free receptor; added
V1a_free_67 = k_r(67) * (1-x(335));

% Reaction: id = hormone binding
V1a_bind_67 = k_Hr * H * x(335);

% Reaction: id = non-sp binding
V1a_ns_67 = k_d * x(335);

% Reaction: id = IP3 synth; added
Vip3_prod_67= k_ip3(67) * H * x(335)/(k_cat + x(335));

% Reaction: id = JChannel
JChannel_67=(1-x(334))*(A*(x(332)*0.5)^4/(x(332)*0.5+k1)^4+L)*(x(333)-x(331));

% Reaction: id = JPump
JPump_67=B*(x(331))^2/((x(331))^2+k2^2);

% Reaction: id = kPLC activity
kPLC_67= Vip3_prod_67 *(1-k3/(x(331)+k3)); % NEW

% Reaction: id = kPhosphatase: IP3 degradation
kPhosphatase_67=D*x(332)*0.5;

% Reaction: id = IP3R inhibition
IP3R_inh_67=E*(x(331))^4*(1-x(334));

% Reaction: id = IP3R activation
IP3R_act_67=F;

% Reaction: id = IP3 exchange
IP3_ex_67=G*(5*x(332)-(x(212)+x(327)+x(347)+x(357)+x(417)));

%########################

%% Cell68
% Compartment: id = cytosol, constant
cytosol_68=1.0;

% Compartment: id = ER_store, constant
ER_store_68=1.0;

% Reaction: free receptor; added
V1a_free_68 = k_r(68) * (1-x(340));

% Reaction: id = hormone binding
V1a_bind_68 = k_Hr * H * x(340);

% Reaction: id = non-sp binding
V1a_ns_68 = k_d * x(340);

% Reaction: id = IP3 synth; added
Vip3_prod_68= k_ip3(68) * H * x(340)/(k_cat + x(340));

% Reaction: id = JChannel
JChannel_68=(1-x(339))*(A*(x(337)*0.5)^4/(x(337)*0.5+k1)^4+L)*(x(338)-x(336));

% Reaction: id = JPump
JPump_68=B*(x(336))^2/((x(336))^2+k2^2);

% Reaction: id = kPLC activity
kPLC_68= Vip3_prod_68 *(1-k3/(x(336)+k3)); % NEW

% Reaction: id = kPhosphatase: IP3 degradation
kPhosphatase_68=D*x(337)*0.5;

% Reaction: id = IP3R inhibition
IP3R_inh_68=E*(x(336))^4*(1-x(339));

% Reaction: id = IP3R activation
IP3R_act_68=F;

% Reaction: id = IP3 exchange
IP3_ex_68=G*(5*x(337)-(x(212)+x(422)+x(427)+x(432)+x(682)));

%########################

%% Cell69
% Compartment: id = cytosol, constant
cytosol_69=1.0;

% Compartment: id = ER_store, constant
ER_store_69=1.0;

% Reaction: free receptor; added
V1a_free_69 = k_r(69) * (1-x(345));

% Reaction: id = hormone binding
V1a_bind_69 = k_Hr * H * x(345);

% Reaction: id = non-sp binding
V1a_ns_69 = k_d * x(345);

% Reaction: id = IP3 synth; added
Vip3_prod_69= k_ip3(69) * H * x(345)/(k_cat + x(345));

% Reaction: id = JChannel
JChannel_69=(1-x(344))*(A*(x(342)*0.5)^4/(x(342)*0.5+k1)^4+L)*(x(343)-x(341));

% Reaction: id = JPump
JPump_69=B*(x(341))^2/((x(341))^2+k2^2);

% Reaction: id = kPLC activity
kPLC_69= Vip3_prod_69 *(1-k3/(x(341)+k3)); % NEW

% Reaction: id = kPhosphatase: IP3 degradation
kPhosphatase_69=D*x(342)*0.5;

% Reaction: id = IP3R inhibition
IP3R_inh_69=E*(x(341))^4*(1-x(344));

% Reaction: id = IP3R activation
IP3R_act_69=F;

% Reaction: id = IP3 exchange
IP3_ex_69=G*(5*x(342)-(x(212)+x(322)+x(327)+x(662)+x(677)));

%########################

%% Cell70
% Compartment: id = cytosol, constant
cytosol_70=1.0;

% Compartment: id = ER_store, constant
ER_store_70=1.0;

% Reaction: free receptor; added
V1a_free_70 = k_r(70) * (1-x(350));

% Reaction: id = hormone binding
V1a_bind_70 = k_Hr * H * x(350);

% Reaction: id = non-sp binding
V1a_ns_70 = k_d * x(350);

% Reaction: id = IP3 synth; added
Vip3_prod_70= k_ip3(70) * H * x(350)/(k_cat + x(350));

% Reaction: id = JChannel
JChannel_70=(1-x(349))*(A*(x(347)*0.5)^4/(x(347)*0.5+k1)^4+L)*(x(348)-x(346));

% Reaction: id = JPump
JPump_70=B*(x(346))^2/((x(346))^2+k2^2);

% Reaction: id = kPLC activity
kPLC_70= Vip3_prod_70 *(1-k3/(x(346)+k3)); % NEW

% Reaction: id = kPhosphatase: IP3 degradation
kPhosphatase_70=D*x(347)*0.5;

% Reaction: id = IP3R inhibition
IP3R_inh_70=E*(x(346))^4*(1-x(349));

% Reaction: id = IP3R activation
IP3R_act_70=F;

% Reaction: id = IP3 exchange
IP3_ex_70=G*(7*x(347)-(x(297)+x(322)+x(327)+x(332)+x(352)+x(357)+x(677)));

%########################

%% Cell71
% Compartment: id = cytosol, constant
cytosol_71=1.0;

% Compartment: id = ER_store, constant
ER_store_71=1.0;

% Reaction: free receptor; added
V1a_free_71 = k_r(71) * (1-x(355));

% Reaction: id = hormone binding
V1a_bind_71 = k_Hr * H * x(355);

% Reaction: id = non-sp binding
V1a_ns_71 = k_d * x(355);

% Reaction: id = IP3 synth; added
Vip3_prod_71= k_ip3(71) * H * x(355)/(k_cat + x(355));

% Reaction: id = JChannel
JChannel_71=(1-x(354))*(A*(x(352)*0.5)^4/(x(352)*0.5+k1)^4+L)*(x(353)-x(351));

% Reaction: id = JPump
JPump_71=B*(x(351))^2/((x(351))^2+k2^2);

% Reaction: id = kPLC activity
kPLC_71= Vip3_prod_71 *(1-k3/(x(351)+k3)); % NEW

% Reaction: id = kPhosphatase: IP3 degradation
kPhosphatase_71=D*x(352)*0.5;

% Reaction: id = IP3R inhibition
IP3R_inh_71=E*(x(351))^4*(1-x(354));

% Reaction: id = IP3R activation
IP3R_act_71=F;

% Reaction: id = IP3 exchange
IP3_ex_71=G*(4*x(352)-(x(297)+x(347)+x(357)+x(362)));

%########################

%% Cell72
% Compartment: id = cytosol, constant
cytosol_72=1.0;

% Compartment: id = ER_store, constant
ER_store_72=1.0;

% Reaction: free receptor; added
V1a_free_72 = k_r(72) * (1-x(360));

% Reaction: id = hormone binding
V1a_bind_72 = k_Hr * H * x(360);

% Reaction: id = non-sp binding
V1a_ns_72 = k_d * x(360);

% Reaction: id = IP3 synth; added
Vip3_prod_72= k_ip3(72) * H * x(360)/(k_cat + x(360));

% Reaction: id = JChannel
JChannel_72=(1-x(359))*(A*(x(357)*0.5)^4/(x(357)*0.5+k1)^4+L)*(x(358)-x(356));

% Reaction: id = JPump
JPump_72=B*(x(356))^2/((x(356))^2+k2^2);

% Reaction: id = kPLC activity
kPLC_72= Vip3_prod_72 *(1-k3/(x(356)+k3)); % NEW

% Reaction: id = kPhosphatase: IP3 degradation
kPhosphatase_72=D*x(357)*0.5;

% Reaction: id = IP3R inhibition
IP3R_inh_72=E*(x(356))^4*(1-x(359));

% Reaction: id = IP3R activation
IP3R_act_72=F;

% Reaction: id = IP3 exchange
IP3_ex_72=G*(5*x(357)-(x(332)+x(347)+x(352)+x(362)+x(412)));

%########################

%% Cell73
% Compartment: id = cytosol, constant
cytosol_73=1.0;

% Compartment: id = ER_store, constant
ER_store_73=1.0;

% Reaction: free receptor; added
V1a_free_73 = k_r(73) * (1-x(365));

% Reaction: id = hormone binding
V1a_bind_73 = k_Hr * H * x(365);

% Reaction: id = non-sp binding
V1a_ns_73 = k_d * x(365);

% Reaction: id = IP3 synth; added
Vip3_prod_73= k_ip3(73) * H * x(365)/(k_cat + x(365));

% Reaction: id = JChannel
JChannel_73=(1-x(364))*(A*(x(362)*0.5)^4/(x(362)*0.5+k1)^4+L)*(x(363)-x(361));

% Reaction: id = JPump
JPump_73=B*(x(361))^2/((x(361))^2+k2^2);

% Reaction: id = kPLC activity
kPLC_73= Vip3_prod_73 *(1-k3/(x(361)+k3)); % NEW

% Reaction: id = kPhosphatase: IP3 degradation
kPhosphatase_73=D*x(362)*0.5;

% Reaction: id = IP3R inhibition
IP3R_inh_73=E*(x(361))^4*(1-x(364));

% Reaction: id = IP3R activation
IP3R_act_73=F;

% Reaction: id = IP3 exchange
IP3_ex_73=G*(5*x(362)-(x(297)+x(352)+x(357)+x(402)+x(467)));

%########################

%% Cell74
% Compartment: id = cytosol, constant
cytosol_74=1.0;

% Compartment: id = ER_store, constant
ER_store_74=1.0;

% Reaction: free receptor; added
V1a_free_74 = k_r(74) * (1-x(370));

% Reaction: id = hormone binding
V1a_bind_74 = k_Hr * H * x(370);

% Reaction: id = non-sp binding
V1a_ns_74 = k_d * x(370);

% Reaction: id = IP3 synth; added
Vip3_prod_74= k_ip3(74) * H * x(370)/(k_cat + x(370));

% Reaction: id = JChannel
JChannel_74=(1-x(369))*(A*(x(367)*0.5)^4/(x(367)*0.5+k1)^4+L)*(x(368)-x(366));

% Reaction: id = JPump
JPump_74=B*(x(366))^2/((x(366))^2+k2^2);

% Reaction: id = kPLC activity
kPLC_74= Vip3_prod_74 *(1-k3/(x(366)+k3)); % NEW

% Reaction: id = kPhosphatase: IP3 degradation
kPhosphatase_74=D*x(367)*0.5;

% Reaction: id = IP3R inhibition
IP3R_inh_74=E*(x(366))^4*(1-x(369));

% Reaction: id = IP3R activation
IP3R_act_74=F;

% Reaction: id = IP3 exchange
IP3_ex_74=G*(5*x(367)-(x(302)+x(307)+x(372)+x(377)+x(407)));

%########################

%% Cell75
% Compartment: id = cytosol, constant
cytosol_75=1.0;

% Compartment: id = ER_store, constant
ER_store_75=1.0;

% Reaction: free receptor; added
V1a_free_75 = k_r(75) * (1-x(375));

% Reaction: id = hormone binding
V1a_bind_75 = k_Hr * H * x(375);

% Reaction: id = non-sp binding
V1a_ns_75 = k_d * x(375);

% Reaction: id = IP3 synth; added
Vip3_prod_75= k_ip3(75) * H * x(375)/(k_cat + x(375));

% Reaction: id = JChannel
JChannel_75=(1-x(374))*(A*(x(372)*0.5)^4/(x(372)*0.5+k1)^4+L)*(x(373)-x(371));

% Reaction: id = JPump
JPump_75=B*(x(371))^2/((x(371))^2+k2^2);

% Reaction: id = kPLC activity
kPLC_75= Vip3_prod_75 *(1-k3/(x(371)+k3)); % NEW

% Reaction: id = kPhosphatase: IP3 degradation
kPhosphatase_75=D*x(372)*0.5;

% Reaction: id = IP3R inhibition
IP3R_inh_75=E*(x(371))^4*(1-x(374));

% Reaction: id = IP3R activation
IP3R_act_75=F;

% Reaction: id = IP3 exchange
IP3_ex_75=G*(5*x(372)-(x(307)+x(367)+x(377)+x(382)+x(387)));

%########################

%% Cell76
% Compartment: id = cytosol, constant
cytosol_76=1.0;

% Compartment: id = ER_store, constant
ER_store_76=1.0;

% Reaction: free receptor; added
V1a_free_76 = k_r(76) * (1-x(380));

% Reaction: id = hormone binding
V1a_bind_76 = k_Hr * H * x(380);

% Reaction: id = non-sp binding
V1a_ns_76 = k_d * x(380);

% Reaction: id = IP3 synth; added
Vip3_prod_76= k_ip3(76) * H * x(380)/(k_cat + x(380));

% Reaction: id = JChannel
JChannel_76=(1-x(379))*(A*(x(377)*0.5)^4/(x(377)*0.5+k1)^4+L)*(x(378)-x(376));

% Reaction: id = JPump
JPump_76=B*(x(376))^2/((x(376))^2+k2^2);

% Reaction: id = kPLC activity
kPLC_76= Vip3_prod_76 *(1-k3/(x(376)+k3)); % NEW

% Reaction: id = kPhosphatase: IP3 degradation
kPhosphatase_76=D*x(377)*0.5;

% Reaction: id = IP3R inhibition
IP3R_inh_76=E*(x(376))^4*(1-x(379));

% Reaction: id = IP3R activation
IP3R_act_76=F;

% Reaction: id = IP3 exchange
IP3_ex_76=G*(4*x(377)-(x(367)+x(372)+x(387)+x(407)));

%########################

%% Cell77
% Compartment: id = cytosol, constant
cytosol_77=1.0;

% Compartment: id = ER_store, constant
ER_store_77=1.0;

% Reaction: free receptor; added
V1a_free_77 = k_r(77) * (1-x(385));

% Reaction: id = hormone binding
V1a_bind_77 = k_Hr * H * x(385);

% Reaction: id = non-sp binding
V1a_ns_77 = k_d * x(385);

% Reaction: id = IP3 synth; added
Vip3_prod_77= k_ip3(77) * H * x(385)/(k_cat + x(385));

% Reaction: id = JChannel
JChannel_77=(1-x(384))*(A*(x(382)*0.5)^4/(x(382)*0.5+k1)^4+L)*(x(383)-x(381));

% Reaction: id = JPump
JPump_77=B*(x(381))^2/((x(381))^2+k2^2);

% Reaction: id = kPLC activity
kPLC_77= Vip3_prod_77 *(1-k3/(x(381)+k3)); % NEW

% Reaction: id = kPhosphatase: IP3 degradation
kPhosphatase_77=D*x(382)*0.5;

% Reaction: id = IP3R inhibition
IP3R_inh_77=E*(x(381))^4*(1-x(384));

% Reaction: id = IP3R activation
IP3R_act_77=F;

% Reaction: id = IP3 exchange
IP3_ex_77=G*(4*x(382)-(x(372)+x(387)+x(392)+x(397)));

%########################

%% Cell78
% Compartment: id = cytosol, constant
cytosol_78=1.0;

% Compartment: id = ER_store, constant
ER_store_78=1.0;

% Reaction: free receptor; added
V1a_free_78 = k_r(78) * (1-x(390));

% Reaction: id = hormone binding
V1a_bind_78 = k_Hr * H * x(390);

% Reaction: id = non-sp binding
V1a_ns_78 = k_d * x(390);

% Reaction: id = IP3 synth; added
Vip3_prod_78= k_ip3(78) * H * x(390)/(k_cat + x(390));

% Reaction: id = JChannel
JChannel_78=(1-x(389))*(A*(x(387)*0.5)^4/(x(387)*0.5+k1)^4+L)*(x(388)-x(386));

% Reaction: id = JPump
JPump_78=B*(x(386))^2/((x(386))^2+k2^2);

% Reaction: id = kPLC activity
kPLC_78= Vip3_prod_78 *(1-k3/(x(386)+k3)); % NEW

% Reaction: id = kPhosphatase: IP3 degradation
kPhosphatase_78=D*x(387)*0.5;

% Reaction: id = IP3R inhibition
IP3R_inh_78=E*(x(386))^4*(1-x(389));

% Reaction: id = IP3R activation
IP3R_act_78=F;

% Reaction: id = IP3 exchange
IP3_ex_78=G*(4*x(387)-(x(372)+x(377)+x(382)+x(392)));

%########################

%% Cell79
% Compartment: id = cytosol, constant
cytosol_79=1.0;

% Compartment: id = ER_store, constant
ER_store_79=1.0;

% Reaction: free receptor; added
V1a_free_79 = k_r(79) * (1-x(395));

% Reaction: id = hormone binding
V1a_bind_79 = k_Hr * H * x(395);

% Reaction: id = non-sp binding
V1a_ns_79 = k_d * x(395);

% Reaction: id = IP3 synth; added
Vip3_prod_79= k_ip3(79) * H * x(395)/(k_cat + x(395));

% Reaction: id = JChannel
JChannel_79=(1-x(394))*(A*(x(392)*0.5)^4/(x(392)*0.5+k1)^4+L)*(x(393)-x(391));

% Reaction: id = JPump
JPump_79=B*(x(391))^2/((x(391))^2+k2^2);

% Reaction: id = kPLC activity
kPLC_79= Vip3_prod_79 *(1-k3/(x(391)+k3)); % NEW

% Reaction: id = kPhosphatase: IP3 degradation
kPhosphatase_79=D*x(392)*0.5;

% Reaction: id = IP3R inhibition
IP3R_inh_79=E*(x(391))^4*(1-x(394));

% Reaction: id = IP3R activation
IP3R_act_79=F;

% Reaction: id = IP3 exchange
IP3_ex_79=G*(2*x(392)-(x(382)+x(387)));

%########################

%% Cell80
% Compartment: id = cytosol, constant
cytosol_80=1.0;

% Compartment: id = ER_store, constant
ER_store_80=1.0;

% Reaction: free receptor; added
V1a_free_80 = k_r(80) * (1-x(400));

% Reaction: id = hormone binding
V1a_bind_80 = k_Hr * H * x(400);

% Reaction: id = non-sp binding
V1a_ns_80 = k_d * x(400);

% Reaction: id = IP3 synth; added
Vip3_prod_80= k_ip3(80) * H * x(400)/(k_cat + x(400));

% Reaction: id = JChannel
JChannel_80=(1-x(399))*(A*(x(397)*0.5)^4/(x(397)*0.5+k1)^4+L)*(x(398)-x(396));

% Reaction: id = JPump
JPump_80=B*(x(396))^2/((x(396))^2+k2^2);

% Reaction: id = kPLC activity
kPLC_80= Vip3_prod_80 *(1-k3/(x(396)+k3)); % NEW

% Reaction: id = kPhosphatase: IP3 degradation
kPhosphatase_80=D*x(397)*0.5;

% Reaction: id = IP3R inhibition
IP3R_inh_80=E*(x(396))^4*(1-x(399));

% Reaction: id = IP3R activation
IP3R_act_80=F;

% Reaction: id = IP3 exchange
IP3_ex_80=G*(3*x(397)-(x(277)+x(382)+x(672)));

%########################

%% Cell81
% Compartment: id = cytosol, constant
cytosol_81=1.0;

% Compartment: id = ER_store, constant
ER_store_81=1.0;

% Reaction: free receptor; added
V1a_free_81 = k_r(81) * (1-x(405));

% Reaction: id = hormone binding
V1a_bind_81 = k_Hr * H * x(405);

% Reaction: id = non-sp binding
V1a_ns_81 = k_d * x(405);

% Reaction: id = IP3 synth; added
Vip3_prod_81= k_ip3(81) * H * x(405)/(k_cat + x(405));

% Reaction: id = JChannel
JChannel_81=(1-x(404))*(A*(x(402)*0.5)^4/(x(402)*0.5+k1)^4+L)*(x(403)-x(401));

% Reaction: id = JPump
JPump_81=B*(x(401))^2/((x(401))^2+k2^2);

% Reaction: id = kPLC activity
kPLC_81= Vip3_prod_81 *(1-k3/(x(401)+k3)); % NEW

% Reaction: id = kPhosphatase: IP3 degradation
kPhosphatase_81=D*x(402)*0.5;

% Reaction: id = IP3R inhibition
IP3R_inh_81=E*(x(401))^4*(1-x(404));

% Reaction: id = IP3R activation
IP3R_act_81=F;

% Reaction: id = IP3 exchange
IP3_ex_81=G*(3*x(402)-(x(362)+x(407)+x(467)));

%########################

%% Cell82
% Compartment: id = cytosol, constant
cytosol_82=1.0;

% Compartment: id = ER_store, constant
ER_store_82=1.0;

% Reaction: free receptor; added
V1a_free_82 = k_r(82) * (1-x(410));

% Reaction: id = hormone binding
V1a_bind_82 = k_Hr * H * x(410);

% Reaction: id = non-sp binding
V1a_ns_82 = k_d * x(410);

% Reaction: id = IP3 synth; added
Vip3_prod_82= k_ip3(82) * H * x(410)/(k_cat + x(410));

% Reaction: id = JChannel
JChannel_82=(1-x(409))*(A*(x(407)*0.5)^4/(x(407)*0.5+k1)^4+L)*(x(408)-x(406));

% Reaction: id = JPump
JPump_82=B*(x(406))^2/((x(406))^2+k2^2);

% Reaction: id = kPLC activity
kPLC_82= Vip3_prod_82 *(1-k3/(x(406)+k3)); % NEW

% Reaction: id = kPhosphatase: IP3 degradation
kPhosphatase_82=D*x(407)*0.5;

% Reaction: id = IP3R inhibition
IP3R_inh_82=E*(x(406))^4*(1-x(409));

% Reaction: id = IP3R activation
IP3R_act_82=F;

% Reaction: id = IP3 exchange
IP3_ex_82=G*(3*x(407)-(x(367)+x(377)+x(402)));

%########################

%% Cell83
% Compartment: id = cytosol, constant
cytosol_83=1.0;

% Compartment: id = ER_store, constant
ER_store_83=1.0;

% Reaction: free receptor; added
V1a_free_83 = k_r(83) * (1-x(415));

% Reaction: id = hormone binding
V1a_bind_83 = k_Hr * H * x(415);

% Reaction: id = non-sp binding
V1a_ns_83 = k_d * x(415);

% Reaction: id = IP3 synth; added
Vip3_prod_83= k_ip3(83) * H * x(415)/(k_cat + x(415));

% Reaction: id = JChannel
JChannel_83=(1-x(414))*(A*(x(412)*0.5)^4/(x(412)*0.5+k1)^4+L)*(x(413)-x(411));

% Reaction: id = JPump
JPump_83=B*(x(411))^2/((x(411))^2+k2^2);

% Reaction: id = kPLC activity
kPLC_83= Vip3_prod_83 *(1-k3/(x(411)+k3)); % NEW

% Reaction: id = kPhosphatase: IP3 degradation
kPhosphatase_83=D*x(412)*0.5;

% Reaction: id = IP3R inhibition
IP3R_inh_83=E*(x(411))^4*(1-x(414));

% Reaction: id = IP3R activation
IP3R_act_83=F;

% Reaction: id = IP3 exchange
IP3_ex_83=G*(3*x(412)-(x(357)+x(417)+x(452)));

%########################

%% Cell84
% Compartment: id = cytosol, constant
cytosol_84=1.0;

% Compartment: id = ER_store, constant
ER_store_84=1.0;

% Reaction: free receptor; added
V1a_free_84 = k_r(84) * (1-x(420));

% Reaction: id = hormone binding
V1a_bind_84 = k_Hr * H * x(420);

% Reaction: id = non-sp binding
V1a_ns_84 = k_d * x(420);

% Reaction: id = IP3 synth; added
Vip3_prod_84= k_ip3(84) * H * x(420)/(k_cat + x(420));

% Reaction: id = JChannel
JChannel_84=(1-x(419))*(A*(x(417)*0.5)^4/(x(417)*0.5+k1)^4+L)*(x(418)-x(416));

% Reaction: id = JPump
JPump_84=B*(x(416))^2/((x(416))^2+k2^2);

% Reaction: id = kPLC activity
kPLC_84= Vip3_prod_84 *(1-k3/(x(416)+k3)); % NEW

% Reaction: id = kPhosphatase: IP3 degradation
kPhosphatase_84=D*x(417)*0.5;

% Reaction: id = IP3R inhibition
IP3R_inh_84=E*(x(416))^4*(1-x(419));

% Reaction: id = IP3R activation
IP3R_act_84=F;

% Reaction: id = IP3 exchange
IP3_ex_84=G*(5*x(417)-(x(332)+x(412)+x(432)+x(442)+x(447)));

%########################

%% Cell85
% Compartment: id = cytosol, constant
cytosol_85=1.0;

% Compartment: id = ER_store, constant
ER_store_85=1.0;

% Reaction: free receptor; added
V1a_free_85 = k_r(85) * (1-x(425));

% Reaction: id = hormone binding
V1a_bind_85 = k_Hr * H * x(425);

% Reaction: id = non-sp binding
V1a_ns_85 = k_d * x(425);

% Reaction: id = IP3 synth; added
Vip3_prod_85= k_ip3(85) * H * x(425)/(k_cat + x(425));

% Reaction: id = JChannel
JChannel_85=(1-x(424))*(A*(x(422)*0.5)^4/(x(422)*0.5+k1)^4+L)*(x(423)-x(421));

% Reaction: id = JPump
JPump_85=B*(x(421))^2/((x(421))^2+k2^2);

% Reaction: id = kPLC activity
kPLC_85= Vip3_prod_85 *(1-k3/(x(421)+k3)); % NEW

% Reaction: id = kPhosphatase: IP3 degradation
kPhosphatase_85=D*x(422)*0.5;

% Reaction: id = IP3R inhibition
IP3R_inh_85=E*(x(421))^4*(1-x(424));

% Reaction: id = IP3R activation
IP3R_act_85=F;

% Reaction: id = IP3 exchange
IP3_ex_85=G*(5*x(422)-(x(197)+x(207)+x(337)+x(427)+x(657)));

%########################

%% Cell86
% Compartment: id = cytosol, constant
cytosol_86=1.0;

% Compartment: id = ER_store, constant
ER_store_86=1.0;

% Reaction: free receptor; added
V1a_free_86 = k_r(86) * (1-x(430));

% Reaction: id = hormone binding
V1a_bind_86 = k_Hr * H * x(430);

% Reaction: id = non-sp binding
V1a_ns_86 = k_d * x(430);

% Reaction: id = IP3 synth; added
Vip3_prod_86= k_ip3(86) * H * x(430)/(k_cat + x(430));

% Reaction: id = JChannel
JChannel_86=(1-x(429))*(A*(x(427)*0.5)^4/(x(427)*0.5+k1)^4+L)*(x(428)-x(426));

% Reaction: id = JPump
JPump_86=B*(x(426))^2/((x(426))^2+k2^2);

% Reaction: id = kPLC activity
kPLC_86= Vip3_prod_86 *(1-k3/(x(426)+k3)); % NEW

% Reaction: id = kPhosphatase: IP3 degradation
kPhosphatase_86=D*x(427)*0.5;

% Reaction: id = IP3R inhibition
IP3R_inh_86=E*(x(426))^4*(1-x(429));

% Reaction: id = IP3R activation
IP3R_act_86=F;

% Reaction: id = IP3 exchange
IP3_ex_86=G*(3*x(427)-(x(337)+x(422)+x(682)));

%########################

%% Cell87
% Compartment: id = cytosol, constant
cytosol_87=1.0;

% Compartment: id = ER_store, constant
ER_store_87=1.0;

% Reaction: free receptor; added
V1a_free_87 = k_r(87) * (1-x(435));

% Reaction: id = hormone binding
V1a_bind_87 = k_Hr * H * x(435);

% Reaction: id = non-sp binding
V1a_ns_87 = k_d * x(435);

% Reaction: id = IP3 synth; added
Vip3_prod_87= k_ip3(87) * H * x(435)/(k_cat + x(435));

% Reaction: id = JChannel
JChannel_87=(1-x(434))*(A*(x(432)*0.5)^4/(x(432)*0.5+k1)^4+L)*(x(433)-x(431));

% Reaction: id = JPump
JPump_87=B*(x(431))^2/((x(431))^2+k2^2);

% Reaction: id = kPLC activity
kPLC_87= Vip3_prod_87 *(1-k3/(x(431)+k3)); % NEW

% Reaction: id = kPhosphatase: IP3 degradation
kPhosphatase_87=D*x(432)*0.5;

% Reaction: id = IP3R inhibition
IP3R_inh_87=E*(x(431))^4*(1-x(434));

% Reaction: id = IP3R activation
IP3R_act_87=F;

% Reaction: id = IP3 exchange
IP3_ex_87=G*(5*x(432)-(x(337)+x(417)+x(437)+x(442)+x(682)));

%########################

%% Cell88
% Compartment: id = cytosol, constant
cytosol_88=1.0;

% Compartment: id = ER_store, constant
ER_store_88=1.0;

% Reaction: free receptor; added
V1a_free_88 = k_r(88) * (1-x(440));

% Reaction: id = hormone binding
V1a_bind_88 = k_Hr * H * x(440);

% Reaction: id = non-sp binding
V1a_ns_88 = k_d * x(440);

% Reaction: id = IP3 synth; added
Vip3_prod_88= k_ip3(88) * H * x(440)/(k_cat + x(440));

% Reaction: id = JChannel
JChannel_88=(1-x(439))*(A*(x(437)*0.5)^4/(x(437)*0.5+k1)^4+L)*(x(438)-x(436));

% Reaction: id = JPump
JPump_88=B*(x(436))^2/((x(436))^2+k2^2);

% Reaction: id = kPLC activity
kPLC_88= Vip3_prod_88 *(1-k3/(x(436)+k3)); % NEW

% Reaction: id = kPhosphatase: IP3 degradation
kPhosphatase_88=D*x(437)*0.5;

% Reaction: id = IP3R inhibition
IP3R_inh_88=E*(x(436))^4*(1-x(439));

% Reaction: id = IP3R activation
IP3R_act_88=F;

% Reaction: id = IP3 exchange
IP3_ex_88=G*(3*x(437)-(x(432)+x(442)+x(682)));

%########################

%% Cell89
% Compartment: id = cytosol, constant
cytosol_89=1.0;

% Compartment: id = ER_store, constant
ER_store_89=1.0;

% Reaction: free receptor; added
V1a_free_89 = k_r(89) * (1-x(445));

% Reaction: id = hormone binding
V1a_bind_89 = k_Hr * H * x(445);

% Reaction: id = non-sp binding
V1a_ns_89 = k_d * x(445);

% Reaction: id = IP3 synth; added
Vip3_prod_89= k_ip3(89) * H * x(445)/(k_cat + x(445));

% Reaction: id = JChannel
JChannel_89=(1-x(444))*(A*(x(442)*0.5)^4/(x(442)*0.5+k1)^4+L)*(x(443)-x(441));

% Reaction: id = JPump
JPump_89=B*(x(441))^2/((x(441))^2+k2^2);

% Reaction: id = kPLC activity
kPLC_89= Vip3_prod_89 *(1-k3/(x(441)+k3)); % NEW

% Reaction: id = kPhosphatase: IP3 degradation
kPhosphatase_89=D*x(442)*0.5;

% Reaction: id = IP3R inhibition
IP3R_inh_89=E*(x(441))^4*(1-x(444));

% Reaction: id = IP3R activation
IP3R_act_89=F;

% Reaction: id = IP3 exchange
IP3_ex_89=G*(5*x(442)-(x(417)+x(432)+x(437)+x(447)+x(482)));

%########################

%% Cell90
% Compartment: id = cytosol, constant
cytosol_90=1.0;

% Compartment: id = ER_store, constant
ER_store_90=1.0;

% Reaction: free receptor; added
V1a_free_90 = k_r(90) * (1-x(450));

% Reaction: id = hormone binding
V1a_bind_90 = k_Hr * H * x(450);

% Reaction: id = non-sp binding
V1a_ns_90 = k_d * x(450);

% Reaction: id = IP3 synth; added
Vip3_prod_90= k_ip3(90) * H * x(450)/(k_cat + x(450));

% Reaction: id = JChannel
JChannel_90=(1-x(449))*(A*(x(447)*0.5)^4/(x(447)*0.5+k1)^4+L)*(x(448)-x(446));

% Reaction: id = JPump
JPump_90=B*(x(446))^2/((x(446))^2+k2^2);

% Reaction: id = kPLC activity
kPLC_90= Vip3_prod_90 *(1-k3/(x(446)+k3)); % NEW

% Reaction: id = kPhosphatase: IP3 degradation
kPhosphatase_90=D*x(447)*0.5;

% Reaction: id = IP3R inhibition
IP3R_inh_90=E*(x(446))^4*(1-x(449));

% Reaction: id = IP3R activation
IP3R_act_90=F;

% Reaction: id = IP3 exchange
IP3_ex_90=G*(4*x(447)-(x(417)+x(442)+x(457)+x(462)));

%########################

%% Cell91
% Compartment: id = cytosol, constant
cytosol_91=1.0;

% Compartment: id = ER_store, constant
ER_store_91=1.0;

% Reaction: free receptor; added
V1a_free_91 = k_r(91) * (1-x(455));

% Reaction: id = hormone binding
V1a_bind_91 = k_Hr * H * x(455);

% Reaction: id = non-sp binding
V1a_ns_91 = k_d * x(455);

% Reaction: id = IP3 synth; added
Vip3_prod_91= k_ip3(91) * H * x(455)/(k_cat + x(455));

% Reaction: id = JChannel
JChannel_91=(1-x(454))*(A*(x(452)*0.5)^4/(x(452)*0.5+k1)^4+L)*(x(453)-x(451));

% Reaction: id = JPump
JPump_91=B*(x(451))^2/((x(451))^2+k2^2);

% Reaction: id = kPLC activity
kPLC_91= Vip3_prod_91 *(1-k3/(x(451)+k3)); % NEW

% Reaction: id = kPhosphatase: IP3 degradation
kPhosphatase_91=D*x(452)*0.5;

% Reaction: id = IP3R inhibition
IP3R_inh_91=E*(x(451))^4*(1-x(454));

% Reaction: id = IP3R activation
IP3R_act_91=F;

% Reaction: id = IP3 exchange
IP3_ex_91=G*(4*x(452)-(x(412)+x(467)+x(472)+x(477)));

%########################

%% Cell92
% Compartment: id = cytosol, constant
cytosol_92=1.0;

% Compartment: id = ER_store, constant
ER_store_92=1.0;

% Reaction: free receptor; added
V1a_free_92 = k_r(92) * (1-x(460));

% Reaction: id = hormone binding
V1a_bind_92 = k_Hr * H * x(460);

% Reaction: id = non-sp binding
V1a_ns_92 = k_d * x(460);

% Reaction: id = IP3 synth; added
Vip3_prod_92= k_ip3(92) * H * x(460)/(k_cat + x(460));

% Reaction: id = JChannel
JChannel_92=(1-x(459))*(A*(x(457)*0.5)^4/(x(457)*0.5+k1)^4+L)*(x(458)-x(456));

% Reaction: id = JPump
JPump_92=B*(x(456))^2/((x(456))^2+k2^2);

% Reaction: id = kPLC activity
kPLC_92= Vip3_prod_92 *(1-k3/(x(456)+k3)); % NEW

% Reaction: id = kPhosphatase: IP3 degradation
kPhosphatase_92=D*x(457)*0.5;

% Reaction: id = IP3R inhibition
IP3R_inh_92=E*(x(456))^4*(1-x(459));

% Reaction: id = IP3R activation
IP3R_act_92=F;

% Reaction: id = IP3 exchange
IP3_ex_92=G*(4*x(457)-(x(447)+x(462)+x(482)+x(587)));

%########################

%% Cell93
% Compartment: id = cytosol, constant
cytosol_93=1.0;

% Compartment: id = ER_store, constant
ER_store_93=1.0;

% Reaction: free receptor; added
V1a_free_93 = k_r(93) * (1-x(465));

% Reaction: id = hormone binding
V1a_bind_93 = k_Hr * H * x(465);

% Reaction: id = non-sp binding
V1a_ns_93 = k_d * x(465);

% Reaction: id = IP3 synth; added
Vip3_prod_93= k_ip3(93) * H * x(465)/(k_cat + x(465));

% Reaction: id = JChannel
JChannel_93=(1-x(464))*(A*(x(462)*0.5)^4/(x(462)*0.5+k1)^4+L)*(x(463)-x(461));

% Reaction: id = JPump
JPump_93=B*(x(461))^2/((x(461))^2+k2^2);

% Reaction: id = kPLC activity
kPLC_93= Vip3_prod_93 *(1-k3/(x(461)+k3)); % NEW

% Reaction: id = kPhosphatase: IP3 degradation
kPhosphatase_93=D*x(462)*0.5;

% Reaction: id = IP3R inhibition
IP3R_inh_93=E*(x(461))^4*(1-x(464));

% Reaction: id = IP3R activation
IP3R_act_93=F;

% Reaction: id = IP3 exchange
IP3_ex_93=G*(4*x(462)-(x(447)+x(457)+x(472)+x(587)));

%########################

%% Cell94
% Compartment: id = cytosol, constant
cytosol_94=1.0;

% Compartment: id = ER_store, constant
ER_store_94=1.0;

% Reaction: free receptor; added
V1a_free_94 = k_r(94) * (1-x(470));

% Reaction: id = hormone binding
V1a_bind_94 = k_Hr * H * x(470);

% Reaction: id = non-sp binding
V1a_ns_94 = k_d * x(470);

% Reaction: id = IP3 synth; added
Vip3_prod_94= k_ip3(94) * H * x(470)/(k_cat + x(470));

% Reaction: id = JChannel
JChannel_94=(1-x(469))*(A*(x(467)*0.5)^4/(x(467)*0.5+k1)^4+L)*(x(468)-x(466));

% Reaction: id = JPump
JPump_94=B*(x(466))^2/((x(466))^2+k2^2);

% Reaction: id = kPLC activity
kPLC_94= Vip3_prod_94 *(1-k3/(x(466)+k3)); % NEW

% Reaction: id = kPhosphatase: IP3 degradation
kPhosphatase_94=D*x(467)*0.5;

% Reaction: id = IP3R inhibition
IP3R_inh_94=E*(x(466))^4*(1-x(469));

% Reaction: id = IP3R activation
IP3R_act_94=F;

% Reaction: id = IP3 exchange
IP3_ex_94=G*(5*x(467)-(x(362)+x(402)+x(452)+x(477)+x(487)));

%########################

%% Cell95
% Compartment: id = cytosol, constant
cytosol_95=1.0;

% Compartment: id = ER_store, constant
ER_store_95=1.0;

% Reaction: free receptor; added
V1a_free_95 = k_r(95) * (1-x(475));

% Reaction: id = hormone binding
V1a_bind_95 = k_Hr * H * x(475);

% Reaction: id = non-sp binding
V1a_ns_95 = k_d * x(475);

% Reaction: id = IP3 synth; added
Vip3_prod_95= k_ip3(95) * H * x(475)/(k_cat + x(475));

% Reaction: id = JChannel
JChannel_95=(1-x(474))*(A*(x(472)*0.5)^4/(x(472)*0.5+k1)^4+L)*(x(473)-x(471));

% Reaction: id = JPump
JPump_95=B*(x(471))^2/((x(471))^2+k2^2);

% Reaction: id = kPLC activity
kPLC_95= Vip3_prod_95 *(1-k3/(x(471)+k3)); % NEW

% Reaction: id = kPhosphatase: IP3 degradation
kPhosphatase_95=D*x(472)*0.5;

% Reaction: id = IP3R inhibition
IP3R_inh_95=E*(x(471))^4*(1-x(474));

% Reaction: id = IP3R activation
IP3R_act_95=F;

% Reaction: id = IP3 exchange
IP3_ex_95=G*(5*x(472)-(x(452)+x(462)+x(477)+x(687)+x(692)));

%########################

%% Cell96
% Compartment: id = cytosol, constant
cytosol_96=1.0;

% Compartment: id = ER_store, constant
ER_store_96=1.0;

% Reaction: free receptor; added
V1a_free_96 = k_r(96) * (1-x(480));

% Reaction: id = hormone binding
V1a_bind_96 = k_Hr * H * x(480);

% Reaction: id = non-sp binding
V1a_ns_96 = k_d * x(480);

% Reaction: id = IP3 synth; added
Vip3_prod_96= k_ip3(96) * H * x(480)/(k_cat + x(480));

% Reaction: id = JChannel
JChannel_96=(1-x(479))*(A*(x(477)*0.5)^4/(x(477)*0.5+k1)^4+L)*(x(478)-x(476));

% Reaction: id = JPump
JPump_96=B*(x(476))^2/((x(476))^2+k2^2);

% Reaction: id = kPLC activity
kPLC_96= Vip3_prod_96 *(1-k3/(x(476)+k3)); % NEW

% Reaction: id = kPhosphatase: IP3 degradation
kPhosphatase_96=D*x(477)*0.5;

% Reaction: id = IP3R inhibition
IP3R_inh_96=E*(x(476))^4*(1-x(479));

% Reaction: id = IP3R activation
IP3R_act_96=F;

% Reaction: id = IP3 exchange
IP3_ex_96=G*(5*x(477)-(x(452)+x(467)+x(472)+x(487)+x(687)));

%########################

%% Cell97
% Compartment: id = cytosol, constant
cytosol_97=1.0;

% Compartment: id = ER_store, constant
ER_store_97=1.0;

% Reaction: free receptor; added
V1a_free_97 = k_r(97) * (1-x(485));

% Reaction: id = hormone binding
V1a_bind_97 = k_Hr * H * x(485);

% Reaction: id = non-sp binding
V1a_ns_97 = k_d * x(485);

% Reaction: id = IP3 synth; added
Vip3_prod_97= k_ip3(97) * H * x(485)/(k_cat + x(485));

% Reaction: id = JChannel
JChannel_97=(1-x(484))*(A*(x(482)*0.5)^4/(x(482)*0.5+k1)^4+L)*(x(483)-x(481));

% Reaction: id = JPump
JPump_97=B*(x(481))^2/((x(481))^2+k2^2);

% Reaction: id = kPLC activity
kPLC_97= Vip3_prod_97 *(1-k3/(x(481)+k3)); % NEW

% Reaction: id = kPhosphatase: IP3 degradation
kPhosphatase_97=D*x(482)*0.5;

% Reaction: id = IP3R inhibition
IP3R_inh_97=E*(x(481))^4*(1-x(484));

% Reaction: id = IP3R activation
IP3R_act_97=F;

% Reaction: id = IP3 exchange
IP3_ex_97=G*(2*x(482)-(x(442)+x(457)));

%########################

%% Cell98
% Compartment: id = cytosol, constant
cytosol_98=1.0;

% Compartment: id = ER_store, constant
ER_store_98=1.0;

% Reaction: free receptor; added
V1a_free_98 = k_r(98) * (1-x(490));

% Reaction: id = hormone binding
V1a_bind_98 = k_Hr * H * x(490);

% Reaction: id = non-sp binding
V1a_ns_98 = k_d * x(490);

% Reaction: id = IP3 synth; added
Vip3_prod_98= k_ip3(98) * H * x(490)/(k_cat + x(490));

% Reaction: id = JChannel
JChannel_98=(1-x(489))*(A*(x(487)*0.5)^4/(x(487)*0.5+k1)^4+L)*(x(488)-x(486));

% Reaction: id = JPump
JPump_98=B*(x(486))^2/((x(486))^2+k2^2);

% Reaction: id = kPLC activity
kPLC_98= Vip3_prod_98 *(1-k3/(x(486)+k3)); % NEW

% Reaction: id = kPhosphatase: IP3 degradation
kPhosphatase_98=D*x(487)*0.5;

% Reaction: id = IP3R inhibition
IP3R_inh_98=E*(x(486))^4*(1-x(489));

% Reaction: id = IP3R activation
IP3R_act_98=F;

% Reaction: id = IP3 exchange
IP3_ex_98=G*(3*x(487)-(x(467)+x(477)+x(687)));

%########################

%% Cell99
% Compartment: id = cytosol, constant
cytosol_99=1.0;

% Compartment: id = ER_store, constant
ER_store_99=1.0;

% Reaction: free receptor; added
V1a_free_99 = k_r(99) * (1-x(495));

% Reaction: id = hormone binding
V1a_bind_99 = k_Hr * H * x(495);

% Reaction: id = non-sp binding
V1a_ns_99 = k_d * x(495);

% Reaction: id = IP3 synth; added
Vip3_prod_99= k_ip3(99) * H * x(495)/(k_cat + x(495));

% Reaction: id = JChannel
JChannel_99=(1-x(494))*(A*(x(492)*0.5)^4/(x(492)*0.5+k1)^4+L)*(x(493)-x(491));

% Reaction: id = JPump
JPump_99=B*(x(491))^2/((x(491))^2+k2^2);

% Reaction: id = kPLC activity
kPLC_99= Vip3_prod_99 *(1-k3/(x(491)+k3)); % NEW

% Reaction: id = kPhosphatase: IP3 degradation
kPhosphatase_99=D*x(492)*0.5;

% Reaction: id = IP3R inhibition
IP3R_inh_99=E*(x(491))^4*(1-x(494));

% Reaction: id = IP3R activation
IP3R_act_99=F;

% Reaction: id = IP3 exchange
IP3_ex_99=G*(5*x(492)-(x(267)+x(497)+x(507)+x(512)+x(517)));

%########################

%% Cell100
% Compartment: id = cytosol, constant
cytosol_100=1.0;

% Compartment: id = ER_store, constant
ER_store_100=1.0;

% Reaction: free receptor; added
V1a_free_100 = k_r(100) * (1-x(500));

% Reaction: id = hormone binding
V1a_bind_100 = k_Hr * H * x(500);

% Reaction: id = non-sp binding
V1a_ns_100 = k_d * x(500);

% Reaction: id = IP3 synth; added
Vip3_prod_100= k_ip3(100) * H * x(500)/(k_cat + x(500));

% Reaction: id = JChannel
JChannel_100=(1-x(499))*(A*(x(497)*0.5)^4/(x(497)*0.5+k1)^4+L)*(x(498)-x(496));

% Reaction: id = JPump
JPump_100=B*(x(496))^2/((x(496))^2+k2^2);

% Reaction: id = kPLC activity
kPLC_100= Vip3_prod_100 *(1-k3/(x(496)+k3)); % NEW

% Reaction: id = kPhosphatase: IP3 degradation
kPhosphatase_100=D*x(497)*0.5;

% Reaction: id = IP3R inhibition
IP3R_inh_100=E*(x(496))^4*(1-x(499));

% Reaction: id = IP3R activation
IP3R_act_100=F;

% Reaction: id = IP3 exchange
IP3_ex_100=G*(5*x(497)-(x(267)+x(492)+x(502)+x(512)+x(532)));

%########################

%% Cell101
% Compartment: id = cytosol, constant
cytosol_101=1.0;

% Compartment: id = ER_store, constant
ER_store_101=1.0;

% Reaction: free receptor; added
V1a_free_101 = k_r(101) * (1-x(505));

% Reaction: id = hormone binding
V1a_bind_101 = k_Hr * H * x(505);

% Reaction: id = non-sp binding
V1a_ns_101 = k_d * x(505);

% Reaction: id = IP3 synth; added
Vip3_prod_101= k_ip3(101) * H * x(505)/(k_cat + x(505));

% Reaction: id = JChannel
JChannel_101=(1-x(504))*(A*(x(502)*0.5)^4/(x(502)*0.5+k1)^4+L)*(x(503)-x(501));

% Reaction: id = JPump
JPump_101=B*(x(501))^2/((x(501))^2+k2^2);

% Reaction: id = kPLC activity
kPLC_101= Vip3_prod_101 *(1-k3/(x(501)+k3)); % NEW

% Reaction: id = kPhosphatase: IP3 degradation
kPhosphatase_101=D*x(502)*0.5;

% Reaction: id = IP3R inhibition
IP3R_inh_101=E*(x(501))^4*(1-x(504));

% Reaction: id = IP3R activation
IP3R_act_101=F;

% Reaction: id = IP3 exchange
IP3_ex_101=G*(4*x(502)-(x(267)+x(497)+x(537)+x(547)));

%########################

%% Cell102
% Compartment: id = cytosol, constant
cytosol_102=1.0;

% Compartment: id = ER_store, constant
ER_store_102=1.0;

% Reaction: free receptor; added
V1a_free_102 = k_r(102) * (1-x(510));

% Reaction: id = hormone binding
V1a_bind_102 = k_Hr * H * x(510);

% Reaction: id = non-sp binding
V1a_ns_102 = k_d * x(510);

% Reaction: id = IP3 synth; added
Vip3_prod_102= k_ip3(102) * H * x(510)/(k_cat + x(510));

% Reaction: id = JChannel
JChannel_102=(1-x(509))*(A*(x(507)*0.5)^4/(x(507)*0.5+k1)^4+L)*(x(508)-x(506));

% Reaction: id = JPump
JPump_102=B*(x(506))^2/((x(506))^2+k2^2);

% Reaction: id = kPLC activity
kPLC_102= Vip3_prod_102 *(1-k3/(x(506)+k3)); % NEW

% Reaction: id = kPhosphatase: IP3 degradation
kPhosphatase_102=D*x(507)*0.5;

% Reaction: id = IP3R inhibition
IP3R_inh_102=E*(x(506))^4*(1-x(509));

% Reaction: id = IP3R activation
IP3R_act_102=F;

% Reaction: id = IP3 exchange
IP3_ex_102=G*(7*x(507)-(x(242)+x(247)+x(252)+x(257)+x(262)+x(267)+x(492)));

%########################

%% Cell103
% Compartment: id = cytosol, constant
cytosol_103=1.0;

% Compartment: id = ER_store, constant
ER_store_103=1.0;

% Reaction: free receptor; added
V1a_free_103 = k_r(103) * (1-x(515));

% Reaction: id = hormone binding
V1a_bind_103 = k_Hr * H * x(515);

% Reaction: id = non-sp binding
V1a_ns_103 = k_d * x(515);

% Reaction: id = IP3 synth; added
Vip3_prod_103= k_ip3(103) * H * x(515)/(k_cat + x(515));

% Reaction: id = JChannel
JChannel_103=(1-x(514))*(A*(x(512)*0.5)^4/(x(512)*0.5+k1)^4+L)*(x(513)-x(511));

% Reaction: id = JPump
JPump_103=B*(x(511))^2/((x(511))^2+k2^2);

% Reaction: id = kPLC activity
kPLC_103= Vip3_prod_103 *(1-k3/(x(511)+k3)); % NEW

% Reaction: id = kPhosphatase: IP3 degradation
kPhosphatase_103=D*x(512)*0.5;

% Reaction: id = IP3R inhibition
IP3R_inh_103=E*(x(511))^4*(1-x(514));

% Reaction: id = IP3R activation
IP3R_act_103=F;

% Reaction: id = IP3 exchange
IP3_ex_103=G*(4*x(512)-(x(492)+x(497)+x(517)+x(527)));

%########################

%% Cell104
% Compartment: id = cytosol, constant
cytosol_104=1.0;

% Compartment: id = ER_store, constant
ER_store_104=1.0;

% Reaction: free receptor; added
V1a_free_104 = k_r(104) * (1-x(520));

% Reaction: id = hormone binding
V1a_bind_104 = k_Hr * H * x(520);

% Reaction: id = non-sp binding
V1a_ns_104 = k_d * x(520);

% Reaction: id = IP3 synth; added
Vip3_prod_104= k_ip3(104) * H * x(520)/(k_cat + x(520));

% Reaction: id = JChannel
JChannel_104=(1-x(519))*(A*(x(517)*0.5)^4/(x(517)*0.5+k1)^4+L)*(x(518)-x(516));

% Reaction: id = JPump
JPump_104=B*(x(516))^2/((x(516))^2+k2^2);

% Reaction: id = kPLC activity
kPLC_104= Vip3_prod_104 *(1-k3/(x(516)+k3)); % NEW

% Reaction: id = kPhosphatase: IP3 degradation
kPhosphatase_104=D*x(517)*0.5;

% Reaction: id = IP3R inhibition
IP3R_inh_104=E*(x(516))^4*(1-x(519));

% Reaction: id = IP3R activation
IP3R_act_104=F;

% Reaction: id = IP3 exchange
IP3_ex_104=G*(4*x(517)-(x(492)+x(512)+x(522)+x(527)));

%########################

%% Cell105
% Compartment: id = cytosol, constant
cytosol_105=1.0;

% Compartment: id = ER_store, constant
ER_store_105=1.0;

% Reaction: free receptor; added
V1a_free_105 = k_r(105) * (1-x(525));

% Reaction: id = hormone binding
V1a_bind_105 = k_Hr * H * x(525);

% Reaction: id = non-sp binding
V1a_ns_105 = k_d * x(525);

% Reaction: id = IP3 synth; added
Vip3_prod_105= k_ip3(105) * H * x(525)/(k_cat + x(525));

% Reaction: id = JChannel
JChannel_105=(1-x(524))*(A*(x(522)*0.5)^4/(x(522)*0.5+k1)^4+L)*(x(523)-x(521));

% Reaction: id = JPump
JPump_105=B*(x(521))^2/((x(521))^2+k2^2);

% Reaction: id = kPLC activity
kPLC_105= Vip3_prod_105 *(1-k3/(x(521)+k3)); % NEW

% Reaction: id = kPhosphatase: IP3 degradation
kPhosphatase_105=D*x(522)*0.5;

% Reaction: id = IP3R inhibition
IP3R_inh_105=E*(x(521))^4*(1-x(524));

% Reaction: id = IP3R activation
IP3R_act_105=F;

% Reaction: id = IP3 exchange
IP3_ex_105=G*(4*x(522)-(x(152)+x(517)+x(527)+x(642)));

%########################

%% Cell106
% Compartment: id = cytosol, constant
cytosol_106=1.0;

% Compartment: id = ER_store, constant
ER_store_106=1.0;

% Reaction: free receptor; added
V1a_free_106 = k_r(106) * (1-x(530));

% Reaction: id = hormone binding
V1a_bind_106 = k_Hr * H * x(530);

% Reaction: id = non-sp binding
V1a_ns_106 = k_d * x(530);

% Reaction: id = IP3 synth; added
Vip3_prod_106= k_ip3(106) * H * x(530)/(k_cat + x(530));

% Reaction: id = JChannel
JChannel_106=(1-x(529))*(A*(x(527)*0.5)^4/(x(527)*0.5+k1)^4+L)*(x(528)-x(526));

% Reaction: id = JPump
JPump_106=B*(x(526))^2/((x(526))^2+k2^2);

% Reaction: id = kPLC activity
kPLC_106= Vip3_prod_106 *(1-k3/(x(526)+k3)); % NEW

% Reaction: id = kPhosphatase: IP3 degradation
kPhosphatase_106=D*x(527)*0.5;

% Reaction: id = IP3R inhibition
IP3R_inh_106=E*(x(526))^4*(1-x(529));

% Reaction: id = IP3R activation
IP3R_act_106=F;

% Reaction: id = IP3 exchange
IP3_ex_106=G*(4*x(527)-(x(152)+x(512)+x(517)+x(522)));

%########################

%% Cell107
% Compartment: id = cytosol, constant
cytosol_107=1.0;

% Compartment: id = ER_store, constant
ER_store_107=1.0;

% Reaction: free receptor; added
V1a_free_107 = k_r(107) * (1-x(535));

% Reaction: id = hormone binding
V1a_bind_107 = k_Hr * H * x(535);

% Reaction: id = non-sp binding
V1a_ns_107 = k_d * x(535);

% Reaction: id = IP3 synth; added
Vip3_prod_107= k_ip3(107) * H * x(535)/(k_cat + x(535));

% Reaction: id = JChannel
JChannel_107=(1-x(534))*(A*(x(532)*0.5)^4/(x(532)*0.5+k1)^4+L)*(x(533)-x(531));

% Reaction: id = JPump
JPump_107=B*(x(531))^2/((x(531))^2+k2^2);

% Reaction: id = kPLC activity
kPLC_107= Vip3_prod_107 *(1-k3/(x(531)+k3)); % NEW

% Reaction: id = kPhosphatase: IP3 degradation
kPhosphatase_107=D*x(532)*0.5;

% Reaction: id = IP3R inhibition
IP3R_inh_107=E*(x(531))^4*(1-x(534));

% Reaction: id = IP3R activation
IP3R_act_107=F;

% Reaction: id = IP3 exchange
IP3_ex_107=G*(2*x(532)-(x(497)+x(537)));

%########################

%% Cell108
% Compartment: id = cytosol, constant
cytosol_108=1.0;

% Compartment: id = ER_store, constant
ER_store_108=1.0;

% Reaction: free receptor; added
V1a_free_108 = k_r(108) * (1-x(540));

% Reaction: id = hormone binding
V1a_bind_108 = k_Hr * H * x(540);

% Reaction: id = non-sp binding
V1a_ns_108 = k_d * x(540);

% Reaction: id = IP3 synth; added
Vip3_prod_108= k_ip3(108) * H * x(540)/(k_cat + x(540));

% Reaction: id = JChannel
JChannel_108=(1-x(539))*(A*(x(537)*0.5)^4/(x(537)*0.5+k1)^4+L)*(x(538)-x(536));

% Reaction: id = JPump
JPump_108=B*(x(536))^2/((x(536))^2+k2^2);

% Reaction: id = kPLC activity
kPLC_108= Vip3_prod_108 *(1-k3/(x(536)+k3)); % NEW

% Reaction: id = kPhosphatase: IP3 degradation
kPhosphatase_108=D*x(537)*0.5;

% Reaction: id = IP3R inhibition
IP3R_inh_108=E*(x(536))^4*(1-x(539));

% Reaction: id = IP3R activation
IP3R_act_108=F;

% Reaction: id = IP3 exchange
IP3_ex_108=G*(2*x(537)-(x(502)+x(532)));

%########################

%% Cell109
% Compartment: id = cytosol, constant
cytosol_109=1.0;

% Compartment: id = ER_store, constant
ER_store_109=1.0;

% Reaction: free receptor; added
V1a_free_109 = k_r(109) * (1-x(545));

% Reaction: id = hormone binding
V1a_bind_109 = k_Hr * H * x(545);

% Reaction: id = non-sp binding
V1a_ns_109 = k_d * x(545);

% Reaction: id = IP3 synth; added
Vip3_prod_109= k_ip3(109) * H * x(545)/(k_cat + x(545));

% Reaction: id = JChannel
JChannel_109=(1-x(544))*(A*(x(542)*0.5)^4/(x(542)*0.5+k1)^4+L)*(x(543)-x(541));

% Reaction: id = JPump
JPump_109=B*(x(541))^2/((x(541))^2+k2^2);

% Reaction: id = kPLC activity
kPLC_109= Vip3_prod_109 *(1-k3/(x(541)+k3)); % NEW

% Reaction: id = kPhosphatase: IP3 degradation
kPhosphatase_109=D*x(542)*0.5;

% Reaction: id = IP3R inhibition
IP3R_inh_109=E*(x(541))^4*(1-x(544));

% Reaction: id = IP3R activation
IP3R_act_109=F;

% Reaction: id = IP3 exchange
IP3_ex_109=G*(3*x(542)-(x(552)+x(567)+x(572)));

%########################

%% Cell110
% Compartment: id = cytosol, constant
cytosol_110=1.0;

% Compartment: id = ER_store, constant
ER_store_110=1.0;

% Reaction: free receptor; added
V1a_free_110 = k_r(110) * (1-x(550));

% Reaction: id = hormone binding
V1a_bind_110 = k_Hr * H * x(550);

% Reaction: id = non-sp binding
V1a_ns_110 = k_d * x(550);

% Reaction: id = IP3 synth; added
Vip3_prod_110= k_ip3(110) * H * x(550)/(k_cat + x(550));

% Reaction: id = JChannel
JChannel_110=(1-x(549))*(A*(x(547)*0.5)^4/(x(547)*0.5+k1)^4+L)*(x(548)-x(546));

% Reaction: id = JPump
JPump_110=B*(x(546))^2/((x(546))^2+k2^2);

% Reaction: id = kPLC activity
kPLC_110= Vip3_prod_110 *(1-k3/(x(546)+k3)); % NEW

% Reaction: id = kPhosphatase: IP3 degradation
kPhosphatase_110=D*x(547)*0.5;

% Reaction: id = IP3R inhibition
IP3R_inh_110=E*(x(546))^4*(1-x(549));

% Reaction: id = IP3R activation
IP3R_act_110=F;

% Reaction: id = IP3 exchange
IP3_ex_110=G*(2*x(547)-(x(502)+x(552)));

%########################

%% Cell111
% Compartment: id = cytosol, constant
cytosol_111=1.0;

% Compartment: id = ER_store, constant
ER_store_111=1.0;

% Reaction: free receptor; added
V1a_free_111 = k_r(111) * (1-x(555));

% Reaction: id = hormone binding
V1a_bind_111 = k_Hr * H * x(555);

% Reaction: id = non-sp binding
V1a_ns_111 = k_d * x(555);

% Reaction: id = IP3 synth; added
Vip3_prod_111= k_ip3(111) * H * x(555)/(k_cat + x(555));

% Reaction: id = JChannel
JChannel_111=(1-x(554))*(A*(x(552)*0.5)^4/(x(552)*0.5+k1)^4+L)*(x(553)-x(551));

% Reaction: id = JPump
JPump_111=B*(x(551))^2/((x(551))^2+k2^2);

% Reaction: id = kPLC activity
kPLC_111= Vip3_prod_111 *(1-k3/(x(551)+k3)); % NEW

% Reaction: id = kPhosphatase: IP3 degradation
kPhosphatase_111=D*x(552)*0.5;

% Reaction: id = IP3R inhibition
IP3R_inh_111=E*(x(551))^4*(1-x(554));

% Reaction: id = IP3R activation
IP3R_act_111=F;

% Reaction: id = IP3 exchange
IP3_ex_111=G*(3*x(552)-(x(542)+x(547)+x(557)));

%########################

%% Cell112
% Compartment: id = cytosol, constant
cytosol_112=1.0;

% Compartment: id = ER_store, constant
ER_store_112=1.0;

% Reaction: free receptor; added
V1a_free_112 = k_r(112) * (1-x(560));

% Reaction: id = hormone binding
V1a_bind_112 = k_Hr * H * x(560);

% Reaction: id = non-sp binding
V1a_ns_112 = k_d * x(560);

% Reaction: id = IP3 synth; added
Vip3_prod_112= k_ip3(112) * H * x(560)/(k_cat + x(560));

% Reaction: id = JChannel
JChannel_112=(1-x(559))*(A*(x(557)*0.5)^4/(x(557)*0.5+k1)^4+L)*(x(558)-x(556));

% Reaction: id = JPump
JPump_112=B*(x(556))^2/((x(556))^2+k2^2);

% Reaction: id = kPLC activity
kPLC_112= Vip3_prod_112 *(1-k3/(x(556)+k3)); % NEW

% Reaction: id = kPhosphatase: IP3 degradation
kPhosphatase_112=D*x(557)*0.5;

% Reaction: id = IP3R inhibition
IP3R_inh_112=E*(x(556))^4*(1-x(559));

% Reaction: id = IP3R activation
IP3R_act_112=F;

% Reaction: id = IP3 exchange
IP3_ex_112=G*(1*x(557)-(x(552)));

%########################

%% Cell113
% Compartment: id = cytosol, constant
cytosol_113=1.0;

% Compartment: id = ER_store, constant
ER_store_113=1.0;

% Reaction: free receptor; added
V1a_free_113 = k_r(113) * (1-x(565));

% Reaction: id = hormone binding
V1a_bind_113 = k_Hr * H * x(565);

% Reaction: id = non-sp binding
V1a_ns_113 = k_d * x(565);

% Reaction: id = IP3 synth; added
Vip3_prod_113= k_ip3(113) * H * x(565)/(k_cat + x(565));

% Reaction: id = JChannel
JChannel_113=(1-x(564))*(A*(x(562)*0.5)^4/(x(562)*0.5+k1)^4+L)*(x(563)-x(561));

% Reaction: id = JPump
JPump_113=B*(x(561))^2/((x(561))^2+k2^2);

% Reaction: id = kPLC activity
kPLC_113= Vip3_prod_113 *(1-k3/(x(561)+k3)); % NEW

% Reaction: id = kPhosphatase: IP3 degradation
kPhosphatase_113=D*x(562)*0.5;

% Reaction: id = IP3R inhibition
IP3R_inh_113=E*(x(561))^4*(1-x(564));

% Reaction: id = IP3R activation
IP3R_act_113=F;

% Reaction: id = IP3 exchange
IP3_ex_113=G*(2*x(562)-(x(567)+x(697)));

%########################

%% Cell114
% Compartment: id = cytosol, constant
cytosol_114=1.0;

% Compartment: id = ER_store, constant
ER_store_114=1.0;

% Reaction: free receptor; added
V1a_free_114 = k_r(114) * (1-x(570));

% Reaction: id = hormone binding
V1a_bind_114 = k_Hr * H * x(570);

% Reaction: id = non-sp binding
V1a_ns_114 = k_d * x(570);

% Reaction: id = IP3 synth; added
Vip3_prod_114= k_ip3(114) * H * x(570)/(k_cat + x(570));

% Reaction: id = JChannel
JChannel_114=(1-x(569))*(A*(x(567)*0.5)^4/(x(567)*0.5+k1)^4+L)*(x(568)-x(566));

% Reaction: id = JPump
JPump_114=B*(x(566))^2/((x(566))^2+k2^2);

% Reaction: id = kPLC activity
kPLC_114= Vip3_prod_114 *(1-k3/(x(566)+k3)); % NEW

% Reaction: id = kPhosphatase: IP3 degradation
kPhosphatase_114=D*x(567)*0.5;

% Reaction: id = IP3R inhibition
IP3R_inh_114=E*(x(566))^4*(1-x(569));

% Reaction: id = IP3R activation
IP3R_act_114=F;

% Reaction: id = IP3 exchange
IP3_ex_114=G*(3*x(567)-(x(542)+x(562)+x(572)));

%########################

%% Cell115
% Compartment: id = cytosol, constant
cytosol_115=1.0;

% Compartment: id = ER_store, constant
ER_store_115=1.0;

% Reaction: free receptor; added
V1a_free_115 = k_r(115) * (1-x(575));

% Reaction: id = hormone binding
V1a_bind_115 = k_Hr * H * x(575);

% Reaction: id = non-sp binding
V1a_ns_115 = k_d * x(575);

% Reaction: id = IP3 synth; added
Vip3_prod_115= k_ip3(115) * H * x(575)/(k_cat + x(575));

% Reaction: id = JChannel
JChannel_115=(1-x(574))*(A*(x(572)*0.5)^4/(x(572)*0.5+k1)^4+L)*(x(573)-x(571));

% Reaction: id = JPump
JPump_115=B*(x(571))^2/((x(571))^2+k2^2);

% Reaction: id = kPLC activity
kPLC_115= Vip3_prod_115 *(1-k3/(x(571)+k3)); % NEW

% Reaction: id = kPhosphatase: IP3 degradation
kPhosphatase_115=D*x(572)*0.5;

% Reaction: id = IP3R inhibition
IP3R_inh_115=E*(x(571))^4*(1-x(574));

% Reaction: id = IP3R activation
IP3R_act_115=F;

% Reaction: id = IP3 exchange
IP3_ex_115=G*(2*x(572)-(x(542)+x(567)));

%########################

%% Cell116
% Compartment: id = cytosol, constant
cytosol_116=1.0;

% Compartment: id = ER_store, constant
ER_store_116=1.0;

% Reaction: free receptor; added
V1a_free_116 = k_r(116) * (1-x(580));

% Reaction: id = hormone binding
V1a_bind_116 = k_Hr * H * x(580);

% Reaction: id = non-sp binding
V1a_ns_116 = k_d * x(580);

% Reaction: id = IP3 synth; added
Vip3_prod_116= k_ip3(116) * H * x(580)/(k_cat + x(580));

% Reaction: id = JChannel
JChannel_116=(1-x(579))*(A*(x(577)*0.5)^4/(x(577)*0.5+k1)^4+L)*(x(578)-x(576));

% Reaction: id = JPump
JPump_116=B*(x(576))^2/((x(576))^2+k2^2);

% Reaction: id = kPLC activity
kPLC_116= Vip3_prod_116 *(1-k3/(x(576)+k3)); % NEW

% Reaction: id = kPhosphatase: IP3 degradation
kPhosphatase_116=D*x(577)*0.5;

% Reaction: id = IP3R inhibition
IP3R_inh_116=E*(x(576))^4*(1-x(579));

% Reaction: id = IP3R activation
IP3R_act_116=F;

% Reaction: id = IP3 exchange
IP3_ex_116=G*(2*x(577)-(x(582)+x(587)));

%########################

%% Cell117
% Compartment: id = cytosol, constant
cytosol_117=1.0;

% Compartment: id = ER_store, constant
ER_store_117=1.0;

% Reaction: free receptor; added
V1a_free_117 = k_r(117) * (1-x(585));

% Reaction: id = hormone binding
V1a_bind_117 = k_Hr * H * x(585);

% Reaction: id = non-sp binding
V1a_ns_117 = k_d * x(585);

% Reaction: id = IP3 synth; added
Vip3_prod_117= k_ip3(117) * H * x(585)/(k_cat + x(585));

% Reaction: id = JChannel
JChannel_117=(1-x(584))*(A*(x(582)*0.5)^4/(x(582)*0.5+k1)^4+L)*(x(583)-x(581));

% Reaction: id = JPump
JPump_117=B*(x(581))^2/((x(581))^2+k2^2);

% Reaction: id = kPLC activity
kPLC_117= Vip3_prod_117 *(1-k3/(x(581)+k3)); % NEW

% Reaction: id = kPhosphatase: IP3 degradation
kPhosphatase_117=D*x(582)*0.5;

% Reaction: id = IP3R inhibition
IP3R_inh_117=E*(x(581))^4*(1-x(584));

% Reaction: id = IP3R activation
IP3R_act_117=F;

% Reaction: id = IP3 exchange
IP3_ex_117=G*(3*x(582)-(x(577)+x(587)+x(592)));

%########################

%% Cell118
% Compartment: id = cytosol, constant
cytosol_118=1.0;

% Compartment: id = ER_store, constant
ER_store_118=1.0;

% Reaction: free receptor; added
V1a_free_118 = k_r(118) * (1-x(590));

% Reaction: id = hormone binding
V1a_bind_118 = k_Hr * H * x(590);

% Reaction: id = non-sp binding
V1a_ns_118 = k_d * x(590);

% Reaction: id = IP3 synth; added
Vip3_prod_118= k_ip3(118) * H * x(590)/(k_cat + x(590));

% Reaction: id = JChannel
JChannel_118=(1-x(589))*(A*(x(587)*0.5)^4/(x(587)*0.5+k1)^4+L)*(x(588)-x(586));

% Reaction: id = JPump
JPump_118=B*(x(586))^2/((x(586))^2+k2^2);

% Reaction: id = kPLC activity
kPLC_118= Vip3_prod_118 *(1-k3/(x(586)+k3)); % NEW

% Reaction: id = kPhosphatase: IP3 degradation
kPhosphatase_118=D*x(587)*0.5;

% Reaction: id = IP3R inhibition
IP3R_inh_118=E*(x(586))^4*(1-x(589));

% Reaction: id = IP3R activation
IP3R_act_118=F;

% Reaction: id = IP3 exchange
IP3_ex_118=G*(5*x(587)-(x(457)+x(462)+x(577)+x(582)+x(692)));

%########################

%% Cell119
% Compartment: id = cytosol, constant
cytosol_119=1.0;

% Compartment: id = ER_store, constant
ER_store_119=1.0;

% Reaction: free receptor; added
V1a_free_119 = k_r(119) * (1-x(595));

% Reaction: id = hormone binding
V1a_bind_119 = k_Hr * H * x(595);

% Reaction: id = non-sp binding
V1a_ns_119 = k_d * x(595);

% Reaction: id = IP3 synth; added
Vip3_prod_119= k_ip3(119) * H * x(595)/(k_cat + x(595));

% Reaction: id = JChannel
JChannel_119=(1-x(594))*(A*(x(592)*0.5)^4/(x(592)*0.5+k1)^4+L)*(x(593)-x(591));

% Reaction: id = JPump
JPump_119=B*(x(591))^2/((x(591))^2+k2^2);

% Reaction: id = kPLC activity
kPLC_119= Vip3_prod_119 *(1-k3/(x(591)+k3)); % NEW

% Reaction: id = kPhosphatase: IP3 degradation
kPhosphatase_119=D*x(592)*0.5;

% Reaction: id = IP3R inhibition
IP3R_inh_119=E*(x(591))^4*(1-x(594));

% Reaction: id = IP3R activation
IP3R_act_119=F;

% Reaction: id = IP3 exchange
IP3_ex_119=G*(2*x(592)-(x(582)+x(702)));

%########################

%% Cell120
% Compartment: id = cytosol, constant
cytosol_120=1.0;

% Compartment: id = ER_store, constant
ER_store_120=1.0;

% Reaction: free receptor; added
V1a_free_120 = k_r(120) * (1-x(600));

% Reaction: id = hormone binding
V1a_bind_120 = k_Hr * H * x(600);

% Reaction: id = non-sp binding
V1a_ns_120 = k_d * x(600);

% Reaction: id = IP3 synth; added
Vip3_prod_120= k_ip3(120) * H * x(600)/(k_cat + x(600));

% Reaction: id = JChannel
JChannel_120=(1-x(599))*(A*(x(597)*0.5)^4/(x(597)*0.5+k1)^4+L)*(x(598)-x(596));

% Reaction: id = JPump
JPump_120=B*(x(596))^2/((x(596))^2+k2^2);

% Reaction: id = kPLC activity
kPLC_120= Vip3_prod_120 *(1-k3/(x(596)+k3)); % NEW

% Reaction: id = kPhosphatase: IP3 degradation
kPhosphatase_120=D*x(597)*0.5;

% Reaction: id = IP3R inhibition
IP3R_inh_120=E*(x(596))^4*(1-x(599));

% Reaction: id = IP3R activation
IP3R_act_120=F;

% Reaction: id = IP3 exchange
IP3_ex_120=G*(2*x(597)-(x(12)+x(77)));

%########################

%% Cell121
% Compartment: id = cytosol, constant
cytosol_121=1.0;

% Compartment: id = ER_store, constant
ER_store_121=1.0;

% Reaction: free receptor; added
V1a_free_121 = k_r(121) * (1-x(605));

% Reaction: id = hormone binding
V1a_bind_121 = k_Hr * H * x(605);

% Reaction: id = non-sp binding
V1a_ns_121 = k_d * x(605);

% Reaction: id = IP3 synth; added
Vip3_prod_121= k_ip3(121) * H * x(605)/(k_cat + x(605));

% Reaction: id = JChannel
JChannel_121=(1-x(604))*(A*(x(602)*0.5)^4/(x(602)*0.5+k1)^4+L)*(x(603)-x(601));

% Reaction: id = JPump
JPump_121=B*(x(601))^2/((x(601))^2+k2^2);

% Reaction: id = kPLC activity
kPLC_121= Vip3_prod_121 *(1-k3/(x(601)+k3)); % NEW

% Reaction: id = kPhosphatase: IP3 degradation
kPhosphatase_121=D*x(602)*0.5;

% Reaction: id = IP3R inhibition
IP3R_inh_121=E*(x(601))^4*(1-x(604));

% Reaction: id = IP3R activation
IP3R_act_121=F;

% Reaction: id = IP3 exchange
IP3_ex_121=G*(2*x(602)-(x(27)+x(37)));

%########################

%% Cell122
% Compartment: id = cytosol, constant
cytosol_122=1.0;

% Compartment: id = ER_store, constant
ER_store_122=1.0;

% Reaction: free receptor; added
V1a_free_122 = k_r(122) * (1-x(610));

% Reaction: id = hormone binding
V1a_bind_122 = k_Hr * H * x(610);

% Reaction: id = non-sp binding
V1a_ns_122 = k_d * x(610);

% Reaction: id = IP3 synth; added
Vip3_prod_122= k_ip3(122) * H * x(610)/(k_cat + x(610));

% Reaction: id = JChannel
JChannel_122=(1-x(609))*(A*(x(607)*0.5)^4/(x(607)*0.5+k1)^4+L)*(x(608)-x(606));

% Reaction: id = JPump
JPump_122=B*(x(606))^2/((x(606))^2+k2^2);

% Reaction: id = kPLC activity
kPLC_122= Vip3_prod_122 *(1-k3/(x(606)+k3)); % NEW

% Reaction: id = kPhosphatase: IP3 degradation
kPhosphatase_122=D*x(607)*0.5;

% Reaction: id = IP3R inhibition
IP3R_inh_122=E*(x(606))^4*(1-x(609));

% Reaction: id = IP3R activation
IP3R_act_122=F;

% Reaction: id = IP3 exchange
IP3_ex_122=G*(1*x(607)-(x(42)));

%########################

%% Cell123
% Compartment: id = cytosol, constant
cytosol_123=1.0;

% Compartment: id = ER_store, constant
ER_store_123=1.0;

% Reaction: free receptor; added
V1a_free_123 = k_r(123) * (1-x(615));

% Reaction: id = hormone binding
V1a_bind_123 = k_Hr * H * x(615);

% Reaction: id = non-sp binding
V1a_ns_123 = k_d * x(615);

% Reaction: id = IP3 synth; added
Vip3_prod_123= k_ip3(123) * H * x(615)/(k_cat + x(615));

% Reaction: id = JChannel
JChannel_123=(1-x(614))*(A*(x(612)*0.5)^4/(x(612)*0.5+k1)^4+L)*(x(613)-x(611));

% Reaction: id = JPump
JPump_123=B*(x(611))^2/((x(611))^2+k2^2);

% Reaction: id = kPLC activity
kPLC_123= Vip3_prod_123 *(1-k3/(x(611)+k3)); % NEW

% Reaction: id = kPhosphatase: IP3 degradation
kPhosphatase_123=D*x(612)*0.5;

% Reaction: id = IP3R inhibition
IP3R_inh_123=E*(x(611))^4*(1-x(614));

% Reaction: id = IP3R activation
IP3R_act_123=F;

% Reaction: id = IP3 exchange
IP3_ex_123=G*(2*x(612)-(x(72)+x(112)));

%########################

%% Cell124
% Compartment: id = cytosol, constant
cytosol_124=1.0;

% Compartment: id = ER_store, constant
ER_store_124=1.0;

% Reaction: free receptor; added
V1a_free_124 = k_r(124) * (1-x(620));

% Reaction: id = hormone binding
V1a_bind_124 = k_Hr * H * x(620);

% Reaction: id = non-sp binding
V1a_ns_124 = k_d * x(620);

% Reaction: id = IP3 synth; added
Vip3_prod_124= k_ip3(124) * H * x(620)/(k_cat + x(620));

% Reaction: id = JChannel
JChannel_124=(1-x(619))*(A*(x(617)*0.5)^4/(x(617)*0.5+k1)^4+L)*(x(618)-x(616));

% Reaction: id = JPump
JPump_124=B*(x(616))^2/((x(616))^2+k2^2);

% Reaction: id = kPLC activity
kPLC_124= Vip3_prod_124 *(1-k3/(x(616)+k3)); % NEW

% Reaction: id = kPhosphatase: IP3 degradation
kPhosphatase_124=D*x(617)*0.5;

% Reaction: id = IP3R inhibition
IP3R_inh_124=E*(x(616))^4*(1-x(619));

% Reaction: id = IP3R activation
IP3R_act_124=F;

% Reaction: id = IP3 exchange
IP3_ex_124=G*(4*x(617)-(x(87)+x(122)+x(162)+x(187)));

%########################

%% Cell125
% Compartment: id = cytosol, constant
cytosol_125=1.0;

% Compartment: id = ER_store, constant
ER_store_125=1.0;

% Reaction: free receptor; added
V1a_free_125 = k_r(125) * (1-x(625));

% Reaction: id = hormone binding
V1a_bind_125 = k_Hr * H * x(625);

% Reaction: id = non-sp binding
V1a_ns_125 = k_d * x(625);

% Reaction: id = IP3 synth; added
Vip3_prod_125= k_ip3(125) * H * x(625)/(k_cat + x(625));

% Reaction: id = JChannel
JChannel_125=(1-x(624))*(A*(x(622)*0.5)^4/(x(622)*0.5+k1)^4+L)*(x(623)-x(621));

% Reaction: id = JPump
JPump_125=B*(x(621))^2/((x(621))^2+k2^2);

% Reaction: id = kPLC activity
kPLC_125= Vip3_prod_125 *(1-k3/(x(621)+k3)); % NEW

% Reaction: id = kPhosphatase: IP3 degradation
kPhosphatase_125=D*x(622)*0.5;

% Reaction: id = IP3R inhibition
IP3R_inh_125=E*(x(621))^4*(1-x(624));

% Reaction: id = IP3R activation
IP3R_act_125=F;

% Reaction: id = IP3 exchange
IP3_ex_125=G*(4*x(622)-(x(102)+x(117)+x(127)+x(627)));

%########################

%% Cell126
% Compartment: id = cytosol, constant
cytosol_126=1.0;

% Compartment: id = ER_store, constant
ER_store_126=1.0;

% Reaction: free receptor; added
V1a_free_126 = k_r(126) * (1-x(630));

% Reaction: id = hormone binding
V1a_bind_126 = k_Hr * H * x(630);

% Reaction: id = non-sp binding
V1a_ns_126 = k_d * x(630);

% Reaction: id = IP3 synth; added
Vip3_prod_126= k_ip3(126) * H * x(630)/(k_cat + x(630));

% Reaction: id = JChannel
JChannel_126=(1-x(629))*(A*(x(627)*0.5)^4/(x(627)*0.5+k1)^4+L)*(x(628)-x(626));

% Reaction: id = JPump
JPump_126=B*(x(626))^2/((x(626))^2+k2^2);

% Reaction: id = kPLC activity
kPLC_126= Vip3_prod_126 *(1-k3/(x(626)+k3)); % NEW

% Reaction: id = kPhosphatase: IP3 degradation
kPhosphatase_126=D*x(627)*0.5;

% Reaction: id = IP3R inhibition
IP3R_inh_126=E*(x(626))^4*(1-x(629));

% Reaction: id = IP3R activation
IP3R_act_126=F;

% Reaction: id = IP3 exchange
IP3_ex_126=G*(3*x(627)-(x(102)+x(127)+x(622)));

%########################

%% Cell127
% Compartment: id = cytosol, constant
cytosol_127=1.0;

% Compartment: id = ER_store, constant
ER_store_127=1.0;

% Reaction: free receptor; added
V1a_free_127 = k_r(127) * (1-x(635));

% Reaction: id = hormone binding
V1a_bind_127 = k_Hr * H * x(635);

% Reaction: id = non-sp binding
V1a_ns_127 = k_d * x(635);

% Reaction: id = IP3 synth; added
Vip3_prod_127= k_ip3(127) * H * x(635)/(k_cat + x(635));

% Reaction: id = JChannel
JChannel_127=(1-x(634))*(A*(x(632)*0.5)^4/(x(632)*0.5+k1)^4+L)*(x(633)-x(631));

% Reaction: id = JPump
JPump_127=B*(x(631))^2/((x(631))^2+k2^2);

% Reaction: id = kPLC activity
kPLC_127= Vip3_prod_127 *(1-k3/(x(631)+k3)); % NEW

% Reaction: id = kPhosphatase: IP3 degradation
kPhosphatase_127=D*x(632)*0.5;

% Reaction: id = IP3R inhibition
IP3R_inh_127=E*(x(631))^4*(1-x(634));

% Reaction: id = IP3R activation
IP3R_act_127=F;

% Reaction: id = IP3 exchange
IP3_ex_127=G*(4*x(632)-(x(132)+x(142)+x(217)+x(317)));

%########################

%% Cell128
% Compartment: id = cytosol, constant
cytosol_128=1.0;

% Compartment: id = ER_store, constant
ER_store_128=1.0;

% Reaction: free receptor; added
V1a_free_128 = k_r(128) * (1-x(640));

% Reaction: id = hormone binding
V1a_bind_128 = k_Hr * H * x(640);

% Reaction: id = non-sp binding
V1a_ns_128 = k_d * x(640);

% Reaction: id = IP3 synth; added
Vip3_prod_128= k_ip3(128) * H * x(640)/(k_cat + x(640));

% Reaction: id = JChannel
JChannel_128=(1-x(639))*(A*(x(637)*0.5)^4/(x(637)*0.5+k1)^4+L)*(x(638)-x(636));

% Reaction: id = JPump
JPump_128=B*(x(636))^2/((x(636))^2+k2^2);

% Reaction: id = kPLC activity
kPLC_128= Vip3_prod_128 *(1-k3/(x(636)+k3)); % NEW

% Reaction: id = kPhosphatase: IP3 degradation
kPhosphatase_128=D*x(637)*0.5;

% Reaction: id = IP3R inhibition
IP3R_inh_128=E*(x(636))^4*(1-x(639));

% Reaction: id = IP3R activation
IP3R_act_128=F;

% Reaction: id = IP3 exchange
IP3_ex_128=G*(1*x(637)-(x(152)));

%########################

%% Cell129
% Compartment: id = cytosol, constant
cytosol_129=1.0;

% Compartment: id = ER_store, constant
ER_store_129=1.0;

% Reaction: free receptor; added
V1a_free_129 = k_r(129) * (1-x(645));

% Reaction: id = hormone binding
V1a_bind_129 = k_Hr * H * x(645);

% Reaction: id = non-sp binding
V1a_ns_129 = k_d * x(645);

% Reaction: id = IP3 synth; added
Vip3_prod_129= k_ip3(129) * H * x(645)/(k_cat + x(645));

% Reaction: id = JChannel
JChannel_129=(1-x(644))*(A*(x(642)*0.5)^4/(x(642)*0.5+k1)^4+L)*(x(643)-x(641));

% Reaction: id = JPump
JPump_129=B*(x(641))^2/((x(641))^2+k2^2);

% Reaction: id = kPLC activity
kPLC_129= Vip3_prod_129 *(1-k3/(x(641)+k3)); % NEW

% Reaction: id = kPhosphatase: IP3 degradation
kPhosphatase_129=D*x(642)*0.5;

% Reaction: id = IP3R inhibition
IP3R_inh_129=E*(x(641))^4*(1-x(644));

% Reaction: id = IP3R activation
IP3R_act_129=F;

% Reaction: id = IP3 exchange
IP3_ex_129=G*(3*x(642)-(x(157)+x(522)+x(647)));

%########################

%% Cell130
% Compartment: id = cytosol, constant
cytosol_130=1.0;

% Compartment: id = ER_store, constant
ER_store_130=1.0;

% Reaction: free receptor; added
V1a_free_130 = k_r(130) * (1-x(650));

% Reaction: id = hormone binding
V1a_bind_130 = k_Hr * H * x(650);

% Reaction: id = non-sp binding
V1a_ns_130 = k_d * x(650);

% Reaction: id = IP3 synth; added
Vip3_prod_130= k_ip3(130) * H * x(650)/(k_cat + x(650));

% Reaction: id = JChannel
JChannel_130=(1-x(649))*(A*(x(647)*0.5)^4/(x(647)*0.5+k1)^4+L)*(x(648)-x(646));

% Reaction: id = JPump
JPump_130=B*(x(646))^2/((x(646))^2+k2^2);

% Reaction: id = kPLC activity
kPLC_130= Vip3_prod_130 *(1-k3/(x(646)+k3)); % NEW

% Reaction: id = kPhosphatase: IP3 degradation
kPhosphatase_130=D*x(647)*0.5;

% Reaction: id = IP3R inhibition
IP3R_inh_130=E*(x(646))^4*(1-x(649));

% Reaction: id = IP3R activation
IP3R_act_130=F;

% Reaction: id = IP3 exchange
IP3_ex_130=G*(5*x(647)-(x(147)+x(157)+x(222)+x(227)+x(642)));

%########################

%% Cell131
% Compartment: id = cytosol, constant
cytosol_131=1.0;

% Compartment: id = ER_store, constant
ER_store_131=1.0;

% Reaction: free receptor; added
V1a_free_131 = k_r(131) * (1-x(655));

% Reaction: id = hormone binding
V1a_bind_131 = k_Hr * H * x(655);

% Reaction: id = non-sp binding
V1a_ns_131 = k_d * x(655);

% Reaction: id = IP3 synth; added
Vip3_prod_131= k_ip3(131) * H * x(655)/(k_cat + x(655));

% Reaction: id = JChannel
JChannel_131=(1-x(654))*(A*(x(652)*0.5)^4/(x(652)*0.5+k1)^4+L)*(x(653)-x(651));

% Reaction: id = JPump
JPump_131=B*(x(651))^2/((x(651))^2+k2^2);

% Reaction: id = kPLC activity
kPLC_131= Vip3_prod_131 *(1-k3/(x(651)+k3)); % NEW

% Reaction: id = kPhosphatase: IP3 degradation
kPhosphatase_131=D*x(652)*0.5;

% Reaction: id = IP3R inhibition
IP3R_inh_131=E*(x(651))^4*(1-x(654));

% Reaction: id = IP3R activation
IP3R_act_131=F;

% Reaction: id = IP3 exchange
IP3_ex_131=G*(3*x(652)-(x(187)+x(197)+x(657)));

%########################

%% Cell132
% Compartment: id = cytosol, constant
cytosol_132=1.0;

% Compartment: id = ER_store, constant
ER_store_132=1.0;

% Reaction: free receptor; added
V1a_free_132 = k_r(132) * (1-x(660));

% Reaction: id = hormone binding
V1a_bind_132 = k_Hr * H * x(660);

% Reaction: id = non-sp binding
V1a_ns_132 = k_d * x(660);

% Reaction: id = IP3 synth; added
Vip3_prod_132= k_ip3(132) * H * x(660)/(k_cat + x(660));

% Reaction: id = JChannel
JChannel_132=(1-x(659))*(A*(x(657)*0.5)^4/(x(657)*0.5+k1)^4+L)*(x(658)-x(656));

% Reaction: id = JPump
JPump_132=B*(x(656))^2/((x(656))^2+k2^2);

% Reaction: id = kPLC activity
kPLC_132= Vip3_prod_132 *(1-k3/(x(656)+k3)); % NEW

% Reaction: id = kPhosphatase: IP3 degradation
kPhosphatase_132=D*x(657)*0.5;

% Reaction: id = IP3R inhibition
IP3R_inh_132=E*(x(656))^4*(1-x(659));

% Reaction: id = IP3R activation
IP3R_act_132=F;

% Reaction: id = IP3 exchange
IP3_ex_132=G*(6*x(657)-(x(192)+x(197)+x(202)+x(207)+x(422)+x(652)));

%########################

%% Cell133
% Compartment: id = cytosol, constant
cytosol_133=1.0;

% Compartment: id = ER_store, constant
ER_store_133=1.0;

% Reaction: free receptor; added
V1a_free_133 = k_r(133) * (1-x(665));

% Reaction: id = hormone binding
V1a_bind_133 = k_Hr * H * x(665);

% Reaction: id = non-sp binding
V1a_ns_133 = k_d * x(665);

% Reaction: id = IP3 synth; added
Vip3_prod_133= k_ip3(133) * H * x(665)/(k_cat + x(665));

% Reaction: id = JChannel
JChannel_133=(1-x(664))*(A*(x(662)*0.5)^4/(x(662)*0.5+k1)^4+L)*(x(663)-x(661));

% Reaction: id = JPump
JPump_133=B*(x(661))^2/((x(661))^2+k2^2);

% Reaction: id = kPLC activity
kPLC_133= Vip3_prod_133 *(1-k3/(x(661)+k3)); % NEW

% Reaction: id = kPhosphatase: IP3 degradation
kPhosphatase_133=D*x(662)*0.5;

% Reaction: id = IP3R inhibition
IP3R_inh_133=E*(x(661))^4*(1-x(664));

% Reaction: id = IP3R activation
IP3R_act_133=F;

% Reaction: id = IP3 exchange
IP3_ex_133=G*(5*x(662)-(x(192)+x(202)+x(207)+x(212)+x(342)));

%########################

%% Cell134
% Compartment: id = cytosol, constant
cytosol_134=1.0;

% Compartment: id = ER_store, constant
ER_store_134=1.0;

% Reaction: free receptor; added
V1a_free_134 = k_r(134) * (1-x(670));

% Reaction: id = hormone binding
V1a_bind_134 = k_Hr * H * x(670);

% Reaction: id = non-sp binding
V1a_ns_134 = k_d * x(670);

% Reaction: id = IP3 synth; added
Vip3_prod_134= k_ip3(134) * H * x(670)/(k_cat + x(670));

% Reaction: id = JChannel
JChannel_134=(1-x(669))*(A*(x(667)*0.5)^4/(x(667)*0.5+k1)^4+L)*(x(668)-x(666));

% Reaction: id = JPump
JPump_134=B*(x(666))^2/((x(666))^2+k2^2);

% Reaction: id = kPLC activity
kPLC_134= Vip3_prod_134 *(1-k3/(x(666)+k3)); % NEW

% Reaction: id = kPhosphatase: IP3 degradation
kPhosphatase_134=D*x(667)*0.5;

% Reaction: id = IP3R inhibition
IP3R_inh_134=E*(x(666))^4*(1-x(669));

% Reaction: id = IP3R activation
IP3R_act_134=F;

% Reaction: id = IP3 exchange
IP3_ex_134=G*(2*x(667)-(x(252)+x(272)));

%########################

%% Cell135
% Compartment: id = cytosol, constant
cytosol_135=1.0;

% Compartment: id = ER_store, constant
ER_store_135=1.0;

% Reaction: free receptor; added
V1a_free_135 = k_r(135) * (1-x(675));

% Reaction: id = hormone binding
V1a_bind_135 = k_Hr * H * x(675);

% Reaction: id = non-sp binding
V1a_ns_135 = k_d * x(675);

% Reaction: id = IP3 synth; added
Vip3_prod_135= k_ip3(135) * H * x(675)/(k_cat + x(675));

% Reaction: id = JChannel
JChannel_135=(1-x(674))*(A*(x(672)*0.5)^4/(x(672)*0.5+k1)^4+L)*(x(673)-x(671));

% Reaction: id = JPump
JPump_135=B*(x(671))^2/((x(671))^2+k2^2);

% Reaction: id = kPLC activity
kPLC_135= Vip3_prod_135 *(1-k3/(x(671)+k3)); % NEW

% Reaction: id = kPhosphatase: IP3 degradation
kPhosphatase_135=D*x(672)*0.5;

% Reaction: id = IP3R inhibition
IP3R_inh_135=E*(x(671))^4*(1-x(674));

% Reaction: id = IP3R activation
IP3R_act_135=F;

% Reaction: id = IP3 exchange
IP3_ex_135=G*(3*x(672)-(x(272)+x(282)+x(397)));

%########################

%% Cell136
% Compartment: id = cytosol, constant
cytosol_136=1.0;

% Compartment: id = ER_store, constant
ER_store_136=1.0;

% Reaction: free receptor; added
V1a_free_136 = k_r(136) * (1-x(680));

% Reaction: id = hormone binding
V1a_bind_136 = k_Hr * H * x(680);

% Reaction: id = non-sp binding
V1a_ns_136 = k_d * x(680);

% Reaction: id = IP3 synth; added
Vip3_prod_136= k_ip3(136) * H * x(680)/(k_cat + x(680));

% Reaction: id = JChannel
JChannel_136=(1-x(679))*(A*(x(677)*0.5)^4/(x(677)*0.5+k1)^4+L)*(x(678)-x(676));

% Reaction: id = JPump
JPump_136=B*(x(676))^2/((x(676))^2+k2^2);

% Reaction: id = kPLC activity
kPLC_136= Vip3_prod_136 *(1-k3/(x(676)+k3)); % NEW

% Reaction: id = kPhosphatase: IP3 degradation
kPhosphatase_136=D*x(677)*0.5;

% Reaction: id = IP3R inhibition
IP3R_inh_136=E*(x(676))^4*(1-x(679));

% Reaction: id = IP3R activation
IP3R_act_136=F;

% Reaction: id = IP3 exchange
IP3_ex_136=G*(4*x(677)-(x(322)+x(327)+x(342)+x(347)));

%########################

%% Cell137
% Compartment: id = cytosol, constant
cytosol_137=1.0;

% Compartment: id = ER_store, constant
ER_store_137=1.0;

% Reaction: free receptor; added
V1a_free_137 = k_r(137) * (1-x(685));

% Reaction: id = hormone binding
V1a_bind_137 = k_Hr * H * x(685);

% Reaction: id = non-sp binding
V1a_ns_137 = k_d * x(685);

% Reaction: id = IP3 synth; added
Vip3_prod_137= k_ip3(137) * H * x(685)/(k_cat + x(685));

% Reaction: id = JChannel
JChannel_137=(1-x(684))*(A*(x(682)*0.5)^4/(x(682)*0.5+k1)^4+L)*(x(683)-x(681));

% Reaction: id = JPump
JPump_137=B*(x(681))^2/((x(681))^2+k2^2);

% Reaction: id = kPLC activity
kPLC_137= Vip3_prod_137 *(1-k3/(x(681)+k3)); % NEW

% Reaction: id = kPhosphatase: IP3 degradation
kPhosphatase_137=D*x(682)*0.5;

% Reaction: id = IP3R inhibition
IP3R_inh_137=E*(x(681))^4*(1-x(684));

% Reaction: id = IP3R activation
IP3R_act_137=F;

% Reaction: id = IP3 exchange
IP3_ex_137=G*(4*x(682)-(x(337)+x(427)+x(432)+x(437)));

%########################

%% Cell138
% Compartment: id = cytosol, constant
cytosol_138=1.0;

% Compartment: id = ER_store, constant
ER_store_138=1.0;

% Reaction: free receptor; added
V1a_free_138 = k_r(138) * (1-x(690));

% Reaction: id = hormone binding
V1a_bind_138 = k_Hr * H * x(690);

% Reaction: id = non-sp binding
V1a_ns_138 = k_d * x(690);

% Reaction: id = IP3 synth; added
Vip3_prod_138= k_ip3(138) * H * x(690)/(k_cat + x(690));

% Reaction: id = JChannel
JChannel_138=(1-x(689))*(A*(x(687)*0.5)^4/(x(687)*0.5+k1)^4+L)*(x(688)-x(686));

% Reaction: id = JPump
JPump_138=B*(x(686))^2/((x(686))^2+k2^2);

% Reaction: id = kPLC activity
kPLC_138= Vip3_prod_138 *(1-k3/(x(686)+k3)); % NEW

% Reaction: id = kPhosphatase: IP3 degradation
kPhosphatase_138=D*x(687)*0.5;

% Reaction: id = IP3R inhibition
IP3R_inh_138=E*(x(686))^4*(1-x(689));

% Reaction: id = IP3R activation
IP3R_act_138=F;

% Reaction: id = IP3 exchange
IP3_ex_138=G*(3*x(687)-(x(472)+x(477)+x(487)));

%########################

%% Cell139
% Compartment: id = cytosol, constant
cytosol_139=1.0;

% Compartment: id = ER_store, constant
ER_store_139=1.0;

% Reaction: free receptor; added
V1a_free_139 = k_r(139) * (1-x(695));

% Reaction: id = hormone binding
V1a_bind_139 = k_Hr * H * x(695);

% Reaction: id = non-sp binding
V1a_ns_139 = k_d * x(695);

% Reaction: id = IP3 synth; added
Vip3_prod_139= k_ip3(139) * H * x(695)/(k_cat + x(695));

% Reaction: id = JChannel
JChannel_139=(1-x(694))*(A*(x(692)*0.5)^4/(x(692)*0.5+k1)^4+L)*(x(693)-x(691));

% Reaction: id = JPump
JPump_139=B*(x(691))^2/((x(691))^2+k2^2);

% Reaction: id = kPLC activity
kPLC_139= Vip3_prod_139 *(1-k3/(x(691)+k3)); % NEW

% Reaction: id = kPhosphatase: IP3 degradation
kPhosphatase_139=D*x(692)*0.5;

% Reaction: id = IP3R inhibition
IP3R_inh_139=E*(x(691))^4*(1-x(694));

% Reaction: id = IP3R activation
IP3R_act_139=F;

% Reaction: id = IP3 exchange
IP3_ex_139=G*(2*x(692)-(x(472)+x(587)));

%########################

%% Cell140
% Compartment: id = cytosol, constant
cytosol_140=1.0;

% Compartment: id = ER_store, constant
ER_store_140=1.0;

% Reaction: free receptor; added
V1a_free_140 = k_r(140) * (1-x(700));

% Reaction: id = hormone binding
V1a_bind_140 = k_Hr * H * x(700);

% Reaction: id = non-sp binding
V1a_ns_140 = k_d * x(700);

% Reaction: id = IP3 synth; added
Vip3_prod_140= k_ip3(140) * H * x(700)/(k_cat + x(700));

% Reaction: id = JChannel
JChannel_140=(1-x(699))*(A*(x(697)*0.5)^4/(x(697)*0.5+k1)^4+L)*(x(698)-x(696));

% Reaction: id = JPump
JPump_140=B*(x(696))^2/((x(696))^2+k2^2);

% Reaction: id = kPLC activity
kPLC_140= Vip3_prod_140 *(1-k3/(x(696)+k3)); % NEW

% Reaction: id = kPhosphatase: IP3 degradation
kPhosphatase_140=D*x(697)*0.5;

% Reaction: id = IP3R inhibition
IP3R_inh_140=E*(x(696))^4*(1-x(699));

% Reaction: id = IP3R activation
IP3R_act_140=F;

% Reaction: id = IP3 exchange
IP3_ex_140=G*(1*x(697)-(x(562)));

%########################

%% Cell141
% Compartment: id = cytosol, constant
cytosol_141=1.0;

% Compartment: id = ER_store, constant
ER_store_141=1.0;

% Reaction: free receptor; added
V1a_free_141 = k_r(141) * (1-x(705));

% Reaction: id = hormone binding
V1a_bind_141 = k_Hr * H * x(705);

% Reaction: id = non-sp binding
V1a_ns_141 = k_d * x(705);

% Reaction: id = IP3 synth; added
Vip3_prod_141= k_ip3(141) * H * x(705)/(k_cat + x(705));

% Reaction: id = JChannel
JChannel_141=(1-x(704))*(A*(x(702)*0.5)^4/(x(702)*0.5+k1)^4+L)*(x(703)-x(701));

% Reaction: id = JPump
JPump_141=B*(x(701))^2/((x(701))^2+k2^2);

% Reaction: id = kPLC activity
kPLC_141= Vip3_prod_141 *(1-k3/(x(701)+k3)); % NEW

% Reaction: id = kPhosphatase: IP3 degradation
kPhosphatase_141=D*x(702)*0.5;

% Reaction: id = IP3R inhibition
IP3R_inh_141=E*(x(701))^4*(1-x(704));

% Reaction: id = IP3R activation
IP3R_act_141=F;

% Reaction: id = IP3 exchange
IP3_ex_141=G*(1*x(702)-(x(592)));

%########################

xdot = zeros(705,1);

% Cell1
% Species:   id = CaI
xdot(1) = (1/(cytosol_1))*(JChannel_1 - JPump_1);

% Species:   id = IP3
xdot(2) = (1/(cytosol_1))*(kPLC_1 - kPhosphatase_1 - IP3_ex_1);

% Species:   id = CaT
xdot(3) = (1/(ER_store_1))*(-JChannel_1 + JPump_1);

% Species:   id = g, species = IP3R
xdot(4) = (1/(cytosol_1))*(IP3R_inh_1- IP3R_act_1);

% Species:   id = r
xdot(5) = (1/(cytosol_1))*(V1a_free_1 - V1a_bind_1 - V1a_ns_1);


% Cell2
% Species:   id = CaI
xdot(6) = (1/(cytosol_2))*(JChannel_2 - JPump_2);

% Species:   id = IP3
xdot(7) = (1/(cytosol_2))*(kPLC_2 - kPhosphatase_2 - IP3_ex_2);

% Species:   id = CaT
xdot(8) = (1/(ER_store_2))*(-JChannel_2 + JPump_2);

% Species:   id = g, species = IP3R
xdot(9) = (1/(cytosol_2))*(IP3R_inh_2- IP3R_act_2);

% Species:   id = r
xdot(10) = (1/(cytosol_2))*(V1a_free_2 - V1a_bind_2 - V1a_ns_2);


% Cell3
% Species:   id = CaI
xdot(11) = (1/(cytosol_3))*(JChannel_3 - JPump_3);

% Species:   id = IP3
xdot(12) = (1/(cytosol_3))*(kPLC_3 - kPhosphatase_3 - IP3_ex_3);

% Species:   id = CaT
xdot(13) = (1/(ER_store_3))*(-JChannel_3 + JPump_3);

% Species:   id = g, species = IP3R
xdot(14) = (1/(cytosol_3))*(IP3R_inh_3- IP3R_act_3);

% Species:   id = r
xdot(15) = (1/(cytosol_3))*(V1a_free_3 - V1a_bind_3 - V1a_ns_3);


% Cell4
% Species:   id = CaI
xdot(16) = (1/(cytosol_4))*(JChannel_4 - JPump_4);

% Species:   id = IP3
xdot(17) = (1/(cytosol_4))*(kPLC_4 - kPhosphatase_4 - IP3_ex_4);

% Species:   id = CaT
xdot(18) = (1/(ER_store_4))*(-JChannel_4 + JPump_4);

% Species:   id = g, species = IP3R
xdot(19) = (1/(cytosol_4))*(IP3R_inh_4- IP3R_act_4);

% Species:   id = r
xdot(20) = (1/(cytosol_4))*(V1a_free_4 - V1a_bind_4 - V1a_ns_4);


% Cell5
% Species:   id = CaI
xdot(21) = (1/(cytosol_5))*(JChannel_5 - JPump_5);

% Species:   id = IP3
xdot(22) = (1/(cytosol_5))*(kPLC_5 - kPhosphatase_5 - IP3_ex_5);

% Species:   id = CaT
xdot(23) = (1/(ER_store_5))*(-JChannel_5 + JPump_5);

% Species:   id = g, species = IP3R
xdot(24) = (1/(cytosol_5))*(IP3R_inh_5- IP3R_act_5);

% Species:   id = r
xdot(25) = (1/(cytosol_5))*(V1a_free_5 - V1a_bind_5 - V1a_ns_5);


% Cell6
% Species:   id = CaI
xdot(26) = (1/(cytosol_6))*(JChannel_6 - JPump_6);

% Species:   id = IP3
xdot(27) = (1/(cytosol_6))*(kPLC_6 - kPhosphatase_6 - IP3_ex_6);

% Species:   id = CaT
xdot(28) = (1/(ER_store_6))*(-JChannel_6 + JPump_6);

% Species:   id = g, species = IP3R
xdot(29) = (1/(cytosol_6))*(IP3R_inh_6- IP3R_act_6);

% Species:   id = r
xdot(30) = (1/(cytosol_6))*(V1a_free_6 - V1a_bind_6 - V1a_ns_6);


% Cell7
% Species:   id = CaI
xdot(31) = (1/(cytosol_7))*(JChannel_7 - JPump_7);

% Species:   id = IP3
xdot(32) = (1/(cytosol_7))*(kPLC_7 - kPhosphatase_7 - IP3_ex_7);

% Species:   id = CaT
xdot(33) = (1/(ER_store_7))*(-JChannel_7 + JPump_7);

% Species:   id = g, species = IP3R
xdot(34) = (1/(cytosol_7))*(IP3R_inh_7- IP3R_act_7);

% Species:   id = r
xdot(35) = (1/(cytosol_7))*(V1a_free_7 - V1a_bind_7 - V1a_ns_7);


% Cell8
% Species:   id = CaI
xdot(36) = (1/(cytosol_8))*(JChannel_8 - JPump_8);

% Species:   id = IP3
xdot(37) = (1/(cytosol_8))*(kPLC_8 - kPhosphatase_8 - IP3_ex_8);

% Species:   id = CaT
xdot(38) = (1/(ER_store_8))*(-JChannel_8 + JPump_8);

% Species:   id = g, species = IP3R
xdot(39) = (1/(cytosol_8))*(IP3R_inh_8- IP3R_act_8);

% Species:   id = r
xdot(40) = (1/(cytosol_8))*(V1a_free_8 - V1a_bind_8 - V1a_ns_8);


% Cell9
% Species:   id = CaI
xdot(41) = (1/(cytosol_9))*(JChannel_9 - JPump_9);

% Species:   id = IP3
xdot(42) = (1/(cytosol_9))*(kPLC_9 - kPhosphatase_9 - IP3_ex_9);

% Species:   id = CaT
xdot(43) = (1/(ER_store_9))*(-JChannel_9 + JPump_9);

% Species:   id = g, species = IP3R
xdot(44) = (1/(cytosol_9))*(IP3R_inh_9- IP3R_act_9);

% Species:   id = r
xdot(45) = (1/(cytosol_9))*(V1a_free_9 - V1a_bind_9 - V1a_ns_9);


% Cell10
% Species:   id = CaI
xdot(46) = (1/(cytosol_10))*(JChannel_10 - JPump_10);

% Species:   id = IP3
xdot(47) = (1/(cytosol_10))*(kPLC_10 - kPhosphatase_10 - IP3_ex_10);

% Species:   id = CaT
xdot(48) = (1/(ER_store_10))*(-JChannel_10 + JPump_10);

% Species:   id = g, species = IP3R
xdot(49) = (1/(cytosol_10))*(IP3R_inh_10- IP3R_act_10);

% Species:   id = r
xdot(50) = (1/(cytosol_10))*(V1a_free_10 - V1a_bind_10 - V1a_ns_10);


% Cell11
% Species:   id = CaI
xdot(51) = (1/(cytosol_11))*(JChannel_11 - JPump_11);

% Species:   id = IP3
xdot(52) = (1/(cytosol_11))*(kPLC_11 - kPhosphatase_11 - IP3_ex_11);

% Species:   id = CaT
xdot(53) = (1/(ER_store_11))*(-JChannel_11 + JPump_11);

% Species:   id = g, species = IP3R
xdot(54) = (1/(cytosol_11))*(IP3R_inh_11- IP3R_act_11);

% Species:   id = r
xdot(55) = (1/(cytosol_11))*(V1a_free_11 - V1a_bind_11 - V1a_ns_11);


% Cell12
% Species:   id = CaI
xdot(56) = (1/(cytosol_12))*(JChannel_12 - JPump_12);

% Species:   id = IP3
xdot(57) = (1/(cytosol_12))*(kPLC_12 - kPhosphatase_12 - IP3_ex_12);

% Species:   id = CaT
xdot(58) = (1/(ER_store_12))*(-JChannel_12 + JPump_12);

% Species:   id = g, species = IP3R
xdot(59) = (1/(cytosol_12))*(IP3R_inh_12- IP3R_act_12);

% Species:   id = r
xdot(60) = (1/(cytosol_12))*(V1a_free_12 - V1a_bind_12 - V1a_ns_12);


% Cell13
% Species:   id = CaI
xdot(61) = (1/(cytosol_13))*(JChannel_13 - JPump_13);

% Species:   id = IP3
xdot(62) = (1/(cytosol_13))*(kPLC_13 - kPhosphatase_13 - IP3_ex_13);

% Species:   id = CaT
xdot(63) = (1/(ER_store_13))*(-JChannel_13 + JPump_13);

% Species:   id = g, species = IP3R
xdot(64) = (1/(cytosol_13))*(IP3R_inh_13- IP3R_act_13);

% Species:   id = r
xdot(65) = (1/(cytosol_13))*(V1a_free_13 - V1a_bind_13 - V1a_ns_13);


% Cell14
% Species:   id = CaI
xdot(66) = (1/(cytosol_14))*(JChannel_14 - JPump_14);

% Species:   id = IP3
xdot(67) = (1/(cytosol_14))*(kPLC_14 - kPhosphatase_14 - IP3_ex_14);

% Species:   id = CaT
xdot(68) = (1/(ER_store_14))*(-JChannel_14 + JPump_14);

% Species:   id = g, species = IP3R
xdot(69) = (1/(cytosol_14))*(IP3R_inh_14- IP3R_act_14);

% Species:   id = r
xdot(70) = (1/(cytosol_14))*(V1a_free_14 - V1a_bind_14 - V1a_ns_14);


% Cell15
% Species:   id = CaI
xdot(71) = (1/(cytosol_15))*(JChannel_15 - JPump_15);

% Species:   id = IP3
xdot(72) = (1/(cytosol_15))*(kPLC_15 - kPhosphatase_15 - IP3_ex_15);

% Species:   id = CaT
xdot(73) = (1/(ER_store_15))*(-JChannel_15 + JPump_15);

% Species:   id = g, species = IP3R
xdot(74) = (1/(cytosol_15))*(IP3R_inh_15- IP3R_act_15);

% Species:   id = r
xdot(75) = (1/(cytosol_15))*(V1a_free_15 - V1a_bind_15 - V1a_ns_15);


% Cell16
% Species:   id = CaI
xdot(76) = (1/(cytosol_16))*(JChannel_16 - JPump_16);

% Species:   id = IP3
xdot(77) = (1/(cytosol_16))*(kPLC_16 - kPhosphatase_16 - IP3_ex_16);

% Species:   id = CaT
xdot(78) = (1/(ER_store_16))*(-JChannel_16 + JPump_16);

% Species:   id = g, species = IP3R
xdot(79) = (1/(cytosol_16))*(IP3R_inh_16- IP3R_act_16);

% Species:   id = r
xdot(80) = (1/(cytosol_16))*(V1a_free_16 - V1a_bind_16 - V1a_ns_16);


% Cell17
% Species:   id = CaI
xdot(81) = (1/(cytosol_17))*(JChannel_17 - JPump_17);

% Species:   id = IP3
xdot(82) = (1/(cytosol_17))*(kPLC_17 - kPhosphatase_17 - IP3_ex_17);

% Species:   id = CaT
xdot(83) = (1/(ER_store_17))*(-JChannel_17 + JPump_17);

% Species:   id = g, species = IP3R
xdot(84) = (1/(cytosol_17))*(IP3R_inh_17- IP3R_act_17);

% Species:   id = r
xdot(85) = (1/(cytosol_17))*(V1a_free_17 - V1a_bind_17 - V1a_ns_17);


% Cell18
% Species:   id = CaI
xdot(86) = (1/(cytosol_18))*(JChannel_18 - JPump_18);

% Species:   id = IP3
xdot(87) = (1/(cytosol_18))*(kPLC_18 - kPhosphatase_18 - IP3_ex_18);

% Species:   id = CaT
xdot(88) = (1/(ER_store_18))*(-JChannel_18 + JPump_18);

% Species:   id = g, species = IP3R
xdot(89) = (1/(cytosol_18))*(IP3R_inh_18- IP3R_act_18);

% Species:   id = r
xdot(90) = (1/(cytosol_18))*(V1a_free_18 - V1a_bind_18 - V1a_ns_18);


% Cell19
% Species:   id = CaI
xdot(91) = (1/(cytosol_19))*(JChannel_19 - JPump_19);

% Species:   id = IP3
xdot(92) = (1/(cytosol_19))*(kPLC_19 - kPhosphatase_19 - IP3_ex_19);

% Species:   id = CaT
xdot(93) = (1/(ER_store_19))*(-JChannel_19 + JPump_19);

% Species:   id = g, species = IP3R
xdot(94) = (1/(cytosol_19))*(IP3R_inh_19- IP3R_act_19);

% Species:   id = r
xdot(95) = (1/(cytosol_19))*(V1a_free_19 - V1a_bind_19 - V1a_ns_19);


% Cell20
% Species:   id = CaI
xdot(96) = (1/(cytosol_20))*(JChannel_20 - JPump_20);

% Species:   id = IP3
xdot(97) = (1/(cytosol_20))*(kPLC_20 - kPhosphatase_20 - IP3_ex_20);

% Species:   id = CaT
xdot(98) = (1/(ER_store_20))*(-JChannel_20 + JPump_20);

% Species:   id = g, species = IP3R
xdot(99) = (1/(cytosol_20))*(IP3R_inh_20- IP3R_act_20);

% Species:   id = r
xdot(100) = (1/(cytosol_20))*(V1a_free_20 - V1a_bind_20 - V1a_ns_20);


% Cell21
% Species:   id = CaI
xdot(101) = (1/(cytosol_21))*(JChannel_21 - JPump_21);

% Species:   id = IP3
xdot(102) = (1/(cytosol_21))*(kPLC_21 - kPhosphatase_21 - IP3_ex_21);

% Species:   id = CaT
xdot(103) = (1/(ER_store_21))*(-JChannel_21 + JPump_21);

% Species:   id = g, species = IP3R
xdot(104) = (1/(cytosol_21))*(IP3R_inh_21- IP3R_act_21);

% Species:   id = r
xdot(105) = (1/(cytosol_21))*(V1a_free_21 - V1a_bind_21 - V1a_ns_21);


% Cell22
% Species:   id = CaI
xdot(106) = (1/(cytosol_22))*(JChannel_22 - JPump_22);

% Species:   id = IP3
xdot(107) = (1/(cytosol_22))*(kPLC_22 - kPhosphatase_22 - IP3_ex_22);

% Species:   id = CaT
xdot(108) = (1/(ER_store_22))*(-JChannel_22 + JPump_22);

% Species:   id = g, species = IP3R
xdot(109) = (1/(cytosol_22))*(IP3R_inh_22- IP3R_act_22);

% Species:   id = r
xdot(110) = (1/(cytosol_22))*(V1a_free_22 - V1a_bind_22 - V1a_ns_22);


% Cell23
% Species:   id = CaI
xdot(111) = (1/(cytosol_23))*(JChannel_23 - JPump_23);

% Species:   id = IP3
xdot(112) = (1/(cytosol_23))*(kPLC_23 - kPhosphatase_23 - IP3_ex_23);

% Species:   id = CaT
xdot(113) = (1/(ER_store_23))*(-JChannel_23 + JPump_23);

% Species:   id = g, species = IP3R
xdot(114) = (1/(cytosol_23))*(IP3R_inh_23- IP3R_act_23);

% Species:   id = r
xdot(115) = (1/(cytosol_23))*(V1a_free_23 - V1a_bind_23 - V1a_ns_23);


% Cell24
% Species:   id = CaI
xdot(116) = (1/(cytosol_24))*(JChannel_24 - JPump_24);

% Species:   id = IP3
xdot(117) = (1/(cytosol_24))*(kPLC_24 - kPhosphatase_24 - IP3_ex_24);

% Species:   id = CaT
xdot(118) = (1/(ER_store_24))*(-JChannel_24 + JPump_24);

% Species:   id = g, species = IP3R
xdot(119) = (1/(cytosol_24))*(IP3R_inh_24- IP3R_act_24);

% Species:   id = r
xdot(120) = (1/(cytosol_24))*(V1a_free_24 - V1a_bind_24 - V1a_ns_24);


% Cell25
% Species:   id = CaI
xdot(121) = (1/(cytosol_25))*(JChannel_25 - JPump_25);

% Species:   id = IP3
xdot(122) = (1/(cytosol_25))*(kPLC_25 - kPhosphatase_25 - IP3_ex_25);

% Species:   id = CaT
xdot(123) = (1/(ER_store_25))*(-JChannel_25 + JPump_25);

% Species:   id = g, species = IP3R
xdot(124) = (1/(cytosol_25))*(IP3R_inh_25- IP3R_act_25);

% Species:   id = r
xdot(125) = (1/(cytosol_25))*(V1a_free_25 - V1a_bind_25 - V1a_ns_25);


% Cell26
% Species:   id = CaI
xdot(126) = (1/(cytosol_26))*(JChannel_26 - JPump_26);

% Species:   id = IP3
xdot(127) = (1/(cytosol_26))*(kPLC_26 - kPhosphatase_26 - IP3_ex_26);

% Species:   id = CaT
xdot(128) = (1/(ER_store_26))*(-JChannel_26 + JPump_26);

% Species:   id = g, species = IP3R
xdot(129) = (1/(cytosol_26))*(IP3R_inh_26- IP3R_act_26);

% Species:   id = r
xdot(130) = (1/(cytosol_26))*(V1a_free_26 - V1a_bind_26 - V1a_ns_26);


% Cell27
% Species:   id = CaI
xdot(131) = (1/(cytosol_27))*(JChannel_27 - JPump_27);

% Species:   id = IP3
xdot(132) = (1/(cytosol_27))*(kPLC_27 - kPhosphatase_27 - IP3_ex_27);

% Species:   id = CaT
xdot(133) = (1/(ER_store_27))*(-JChannel_27 + JPump_27);

% Species:   id = g, species = IP3R
xdot(134) = (1/(cytosol_27))*(IP3R_inh_27- IP3R_act_27);

% Species:   id = r
xdot(135) = (1/(cytosol_27))*(V1a_free_27 - V1a_bind_27 - V1a_ns_27);


% Cell28
% Species:   id = CaI
xdot(136) = (1/(cytosol_28))*(JChannel_28 - JPump_28);

% Species:   id = IP3
xdot(137) = (1/(cytosol_28))*(kPLC_28 - kPhosphatase_28 - IP3_ex_28);

% Species:   id = CaT
xdot(138) = (1/(ER_store_28))*(-JChannel_28 + JPump_28);

% Species:   id = g, species = IP3R
xdot(139) = (1/(cytosol_28))*(IP3R_inh_28- IP3R_act_28);

% Species:   id = r
xdot(140) = (1/(cytosol_28))*(V1a_free_28 - V1a_bind_28 - V1a_ns_28);


% Cell29
% Species:   id = CaI
xdot(141) = (1/(cytosol_29))*(JChannel_29 - JPump_29);

% Species:   id = IP3
xdot(142) = (1/(cytosol_29))*(kPLC_29 - kPhosphatase_29 - IP3_ex_29);

% Species:   id = CaT
xdot(143) = (1/(ER_store_29))*(-JChannel_29 + JPump_29);

% Species:   id = g, species = IP3R
xdot(144) = (1/(cytosol_29))*(IP3R_inh_29- IP3R_act_29);

% Species:   id = r
xdot(145) = (1/(cytosol_29))*(V1a_free_29 - V1a_bind_29 - V1a_ns_29);


% Cell30
% Species:   id = CaI
xdot(146) = (1/(cytosol_30))*(JChannel_30 - JPump_30);

% Species:   id = IP3
xdot(147) = (1/(cytosol_30))*(kPLC_30 - kPhosphatase_30 - IP3_ex_30);

% Species:   id = CaT
xdot(148) = (1/(ER_store_30))*(-JChannel_30 + JPump_30);

% Species:   id = g, species = IP3R
xdot(149) = (1/(cytosol_30))*(IP3R_inh_30- IP3R_act_30);

% Species:   id = r
xdot(150) = (1/(cytosol_30))*(V1a_free_30 - V1a_bind_30 - V1a_ns_30);


% Cell31
% Species:   id = CaI
xdot(151) = (1/(cytosol_31))*(JChannel_31 - JPump_31);

% Species:   id = IP3
xdot(152) = (1/(cytosol_31))*(kPLC_31 - kPhosphatase_31 - IP3_ex_31);

% Species:   id = CaT
xdot(153) = (1/(ER_store_31))*(-JChannel_31 + JPump_31);

% Species:   id = g, species = IP3R
xdot(154) = (1/(cytosol_31))*(IP3R_inh_31- IP3R_act_31);

% Species:   id = r
xdot(155) = (1/(cytosol_31))*(V1a_free_31 - V1a_bind_31 - V1a_ns_31);


% Cell32
% Species:   id = CaI
xdot(156) = (1/(cytosol_32))*(JChannel_32 - JPump_32);

% Species:   id = IP3
xdot(157) = (1/(cytosol_32))*(kPLC_32 - kPhosphatase_32 - IP3_ex_32);

% Species:   id = CaT
xdot(158) = (1/(ER_store_32))*(-JChannel_32 + JPump_32);

% Species:   id = g, species = IP3R
xdot(159) = (1/(cytosol_32))*(IP3R_inh_32- IP3R_act_32);

% Species:   id = r
xdot(160) = (1/(cytosol_32))*(V1a_free_32 - V1a_bind_32 - V1a_ns_32);


% Cell33
% Species:   id = CaI
xdot(161) = (1/(cytosol_33))*(JChannel_33 - JPump_33);

% Species:   id = IP3
xdot(162) = (1/(cytosol_33))*(kPLC_33 - kPhosphatase_33 - IP3_ex_33);

% Species:   id = CaT
xdot(163) = (1/(ER_store_33))*(-JChannel_33 + JPump_33);

% Species:   id = g, species = IP3R
xdot(164) = (1/(cytosol_33))*(IP3R_inh_33- IP3R_act_33);

% Species:   id = r
xdot(165) = (1/(cytosol_33))*(V1a_free_33 - V1a_bind_33 - V1a_ns_33);


% Cell34
% Species:   id = CaI
xdot(166) = (1/(cytosol_34))*(JChannel_34 - JPump_34);

% Species:   id = IP3
xdot(167) = (1/(cytosol_34))*(kPLC_34 - kPhosphatase_34 - IP3_ex_34);

% Species:   id = CaT
xdot(168) = (1/(ER_store_34))*(-JChannel_34 + JPump_34);

% Species:   id = g, species = IP3R
xdot(169) = (1/(cytosol_34))*(IP3R_inh_34- IP3R_act_34);

% Species:   id = r
xdot(170) = (1/(cytosol_34))*(V1a_free_34 - V1a_bind_34 - V1a_ns_34);


% Cell35
% Species:   id = CaI
xdot(171) = (1/(cytosol_35))*(JChannel_35 - JPump_35);

% Species:   id = IP3
xdot(172) = (1/(cytosol_35))*(kPLC_35 - kPhosphatase_35 - IP3_ex_35);

% Species:   id = CaT
xdot(173) = (1/(ER_store_35))*(-JChannel_35 + JPump_35);

% Species:   id = g, species = IP3R
xdot(174) = (1/(cytosol_35))*(IP3R_inh_35- IP3R_act_35);

% Species:   id = r
xdot(175) = (1/(cytosol_35))*(V1a_free_35 - V1a_bind_35 - V1a_ns_35);


% Cell36
% Species:   id = CaI
xdot(176) = (1/(cytosol_36))*(JChannel_36 - JPump_36);

% Species:   id = IP3
xdot(177) = (1/(cytosol_36))*(kPLC_36 - kPhosphatase_36 - IP3_ex_36);

% Species:   id = CaT
xdot(178) = (1/(ER_store_36))*(-JChannel_36 + JPump_36);

% Species:   id = g, species = IP3R
xdot(179) = (1/(cytosol_36))*(IP3R_inh_36- IP3R_act_36);

% Species:   id = r
xdot(180) = (1/(cytosol_36))*(V1a_free_36 - V1a_bind_36 - V1a_ns_36);


% Cell37
% Species:   id = CaI
xdot(181) = (1/(cytosol_37))*(JChannel_37 - JPump_37);

% Species:   id = IP3
xdot(182) = (1/(cytosol_37))*(kPLC_37 - kPhosphatase_37 - IP3_ex_37);

% Species:   id = CaT
xdot(183) = (1/(ER_store_37))*(-JChannel_37 + JPump_37);

% Species:   id = g, species = IP3R
xdot(184) = (1/(cytosol_37))*(IP3R_inh_37- IP3R_act_37);

% Species:   id = r
xdot(185) = (1/(cytosol_37))*(V1a_free_37 - V1a_bind_37 - V1a_ns_37);


% Cell38
% Species:   id = CaI
xdot(186) = (1/(cytosol_38))*(JChannel_38 - JPump_38);

% Species:   id = IP3
xdot(187) = (1/(cytosol_38))*(kPLC_38 - kPhosphatase_38 - IP3_ex_38);

% Species:   id = CaT
xdot(188) = (1/(ER_store_38))*(-JChannel_38 + JPump_38);

% Species:   id = g, species = IP3R
xdot(189) = (1/(cytosol_38))*(IP3R_inh_38- IP3R_act_38);

% Species:   id = r
xdot(190) = (1/(cytosol_38))*(V1a_free_38 - V1a_bind_38 - V1a_ns_38);


% Cell39
% Species:   id = CaI
xdot(191) = (1/(cytosol_39))*(JChannel_39 - JPump_39);

% Species:   id = IP3
xdot(192) = (1/(cytosol_39))*(kPLC_39 - kPhosphatase_39 - IP3_ex_39);

% Species:   id = CaT
xdot(193) = (1/(ER_store_39))*(-JChannel_39 + JPump_39);

% Species:   id = g, species = IP3R
xdot(194) = (1/(cytosol_39))*(IP3R_inh_39- IP3R_act_39);

% Species:   id = r
xdot(195) = (1/(cytosol_39))*(V1a_free_39 - V1a_bind_39 - V1a_ns_39);


% Cell40
% Species:   id = CaI
xdot(196) = (1/(cytosol_40))*(JChannel_40 - JPump_40);

% Species:   id = IP3
xdot(197) = (1/(cytosol_40))*(kPLC_40 - kPhosphatase_40 - IP3_ex_40);

% Species:   id = CaT
xdot(198) = (1/(ER_store_40))*(-JChannel_40 + JPump_40);

% Species:   id = g, species = IP3R
xdot(199) = (1/(cytosol_40))*(IP3R_inh_40- IP3R_act_40);

% Species:   id = r
xdot(200) = (1/(cytosol_40))*(V1a_free_40 - V1a_bind_40 - V1a_ns_40);


% Cell41
% Species:   id = CaI
xdot(201) = (1/(cytosol_41))*(JChannel_41 - JPump_41);

% Species:   id = IP3
xdot(202) = (1/(cytosol_41))*(kPLC_41 - kPhosphatase_41 - IP3_ex_41);

% Species:   id = CaT
xdot(203) = (1/(ER_store_41))*(-JChannel_41 + JPump_41);

% Species:   id = g, species = IP3R
xdot(204) = (1/(cytosol_41))*(IP3R_inh_41- IP3R_act_41);

% Species:   id = r
xdot(205) = (1/(cytosol_41))*(V1a_free_41 - V1a_bind_41 - V1a_ns_41);


% Cell42
% Species:   id = CaI
xdot(206) = (1/(cytosol_42))*(JChannel_42 - JPump_42);

% Species:   id = IP3
xdot(207) = (1/(cytosol_42))*(kPLC_42 - kPhosphatase_42 - IP3_ex_42);

% Species:   id = CaT
xdot(208) = (1/(ER_store_42))*(-JChannel_42 + JPump_42);

% Species:   id = g, species = IP3R
xdot(209) = (1/(cytosol_42))*(IP3R_inh_42- IP3R_act_42);

% Species:   id = r
xdot(210) = (1/(cytosol_42))*(V1a_free_42 - V1a_bind_42 - V1a_ns_42);


% Cell43
% Species:   id = CaI
xdot(211) = (1/(cytosol_43))*(JChannel_43 - JPump_43);

% Species:   id = IP3
xdot(212) = (1/(cytosol_43))*(kPLC_43 - kPhosphatase_43 - IP3_ex_43);

% Species:   id = CaT
xdot(213) = (1/(ER_store_43))*(-JChannel_43 + JPump_43);

% Species:   id = g, species = IP3R
xdot(214) = (1/(cytosol_43))*(IP3R_inh_43- IP3R_act_43);

% Species:   id = r
xdot(215) = (1/(cytosol_43))*(V1a_free_43 - V1a_bind_43 - V1a_ns_43);


% Cell44
% Species:   id = CaI
xdot(216) = (1/(cytosol_44))*(JChannel_44 - JPump_44);

% Species:   id = IP3
xdot(217) = (1/(cytosol_44))*(kPLC_44 - kPhosphatase_44 - IP3_ex_44);

% Species:   id = CaT
xdot(218) = (1/(ER_store_44))*(-JChannel_44 + JPump_44);

% Species:   id = g, species = IP3R
xdot(219) = (1/(cytosol_44))*(IP3R_inh_44- IP3R_act_44);

% Species:   id = r
xdot(220) = (1/(cytosol_44))*(V1a_free_44 - V1a_bind_44 - V1a_ns_44);


% Cell45
% Species:   id = CaI
xdot(221) = (1/(cytosol_45))*(JChannel_45 - JPump_45);

% Species:   id = IP3
xdot(222) = (1/(cytosol_45))*(kPLC_45 - kPhosphatase_45 - IP3_ex_45);

% Species:   id = CaT
xdot(223) = (1/(ER_store_45))*(-JChannel_45 + JPump_45);

% Species:   id = g, species = IP3R
xdot(224) = (1/(cytosol_45))*(IP3R_inh_45- IP3R_act_45);

% Species:   id = r
xdot(225) = (1/(cytosol_45))*(V1a_free_45 - V1a_bind_45 - V1a_ns_45);


% Cell46
% Species:   id = CaI
xdot(226) = (1/(cytosol_46))*(JChannel_46 - JPump_46);

% Species:   id = IP3
xdot(227) = (1/(cytosol_46))*(kPLC_46 - kPhosphatase_46 - IP3_ex_46);

% Species:   id = CaT
xdot(228) = (1/(ER_store_46))*(-JChannel_46 + JPump_46);

% Species:   id = g, species = IP3R
xdot(229) = (1/(cytosol_46))*(IP3R_inh_46- IP3R_act_46);

% Species:   id = r
xdot(230) = (1/(cytosol_46))*(V1a_free_46 - V1a_bind_46 - V1a_ns_46);


% Cell47
% Species:   id = CaI
xdot(231) = (1/(cytosol_47))*(JChannel_47 - JPump_47);

% Species:   id = IP3
xdot(232) = (1/(cytosol_47))*(kPLC_47 - kPhosphatase_47 - IP3_ex_47);

% Species:   id = CaT
xdot(233) = (1/(ER_store_47))*(-JChannel_47 + JPump_47);

% Species:   id = g, species = IP3R
xdot(234) = (1/(cytosol_47))*(IP3R_inh_47- IP3R_act_47);

% Species:   id = r
xdot(235) = (1/(cytosol_47))*(V1a_free_47 - V1a_bind_47 - V1a_ns_47);


% Cell48
% Species:   id = CaI
xdot(236) = (1/(cytosol_48))*(JChannel_48 - JPump_48);

% Species:   id = IP3
xdot(237) = (1/(cytosol_48))*(kPLC_48 - kPhosphatase_48 - IP3_ex_48);

% Species:   id = CaT
xdot(238) = (1/(ER_store_48))*(-JChannel_48 + JPump_48);

% Species:   id = g, species = IP3R
xdot(239) = (1/(cytosol_48))*(IP3R_inh_48- IP3R_act_48);

% Species:   id = r
xdot(240) = (1/(cytosol_48))*(V1a_free_48 - V1a_bind_48 - V1a_ns_48);


% Cell49
% Species:   id = CaI
xdot(241) = (1/(cytosol_49))*(JChannel_49 - JPump_49);

% Species:   id = IP3
xdot(242) = (1/(cytosol_49))*(kPLC_49 - kPhosphatase_49 - IP3_ex_49);

% Species:   id = CaT
xdot(243) = (1/(ER_store_49))*(-JChannel_49 + JPump_49);

% Species:   id = g, species = IP3R
xdot(244) = (1/(cytosol_49))*(IP3R_inh_49- IP3R_act_49);

% Species:   id = r
xdot(245) = (1/(cytosol_49))*(V1a_free_49 - V1a_bind_49 - V1a_ns_49);


% Cell50
% Species:   id = CaI
xdot(246) = (1/(cytosol_50))*(JChannel_50 - JPump_50);

% Species:   id = IP3
xdot(247) = (1/(cytosol_50))*(kPLC_50 - kPhosphatase_50 - IP3_ex_50);

% Species:   id = CaT
xdot(248) = (1/(ER_store_50))*(-JChannel_50 + JPump_50);

% Species:   id = g, species = IP3R
xdot(249) = (1/(cytosol_50))*(IP3R_inh_50- IP3R_act_50);

% Species:   id = r
xdot(250) = (1/(cytosol_50))*(V1a_free_50 - V1a_bind_50 - V1a_ns_50);


% Cell51
% Species:   id = CaI
xdot(251) = (1/(cytosol_51))*(JChannel_51 - JPump_51);

% Species:   id = IP3
xdot(252) = (1/(cytosol_51))*(kPLC_51 - kPhosphatase_51 - IP3_ex_51);

% Species:   id = CaT
xdot(253) = (1/(ER_store_51))*(-JChannel_51 + JPump_51);

% Species:   id = g, species = IP3R
xdot(254) = (1/(cytosol_51))*(IP3R_inh_51- IP3R_act_51);

% Species:   id = r
xdot(255) = (1/(cytosol_51))*(V1a_free_51 - V1a_bind_51 - V1a_ns_51);


% Cell52
% Species:   id = CaI
xdot(256) = (1/(cytosol_52))*(JChannel_52 - JPump_52);

% Species:   id = IP3
xdot(257) = (1/(cytosol_52))*(kPLC_52 - kPhosphatase_52 - IP3_ex_52);

% Species:   id = CaT
xdot(258) = (1/(ER_store_52))*(-JChannel_52 + JPump_52);

% Species:   id = g, species = IP3R
xdot(259) = (1/(cytosol_52))*(IP3R_inh_52- IP3R_act_52);

% Species:   id = r
xdot(260) = (1/(cytosol_52))*(V1a_free_52 - V1a_bind_52 - V1a_ns_52);


% Cell53
% Species:   id = CaI
xdot(261) = (1/(cytosol_53))*(JChannel_53 - JPump_53);

% Species:   id = IP3
xdot(262) = (1/(cytosol_53))*(kPLC_53 - kPhosphatase_53 - IP3_ex_53);

% Species:   id = CaT
xdot(263) = (1/(ER_store_53))*(-JChannel_53 + JPump_53);

% Species:   id = g, species = IP3R
xdot(264) = (1/(cytosol_53))*(IP3R_inh_53- IP3R_act_53);

% Species:   id = r
xdot(265) = (1/(cytosol_53))*(V1a_free_53 - V1a_bind_53 - V1a_ns_53);


% Cell54
% Species:   id = CaI
xdot(266) = (1/(cytosol_54))*(JChannel_54 - JPump_54);

% Species:   id = IP3
xdot(267) = (1/(cytosol_54))*(kPLC_54 - kPhosphatase_54 - IP3_ex_54);

% Species:   id = CaT
xdot(268) = (1/(ER_store_54))*(-JChannel_54 + JPump_54);

% Species:   id = g, species = IP3R
xdot(269) = (1/(cytosol_54))*(IP3R_inh_54- IP3R_act_54);

% Species:   id = r
xdot(270) = (1/(cytosol_54))*(V1a_free_54 - V1a_bind_54 - V1a_ns_54);


% Cell55
% Species:   id = CaI
xdot(271) = (1/(cytosol_55))*(JChannel_55 - JPump_55);

% Species:   id = IP3
xdot(272) = (1/(cytosol_55))*(kPLC_55 - kPhosphatase_55 - IP3_ex_55);

% Species:   id = CaT
xdot(273) = (1/(ER_store_55))*(-JChannel_55 + JPump_55);

% Species:   id = g, species = IP3R
xdot(274) = (1/(cytosol_55))*(IP3R_inh_55- IP3R_act_55);

% Species:   id = r
xdot(275) = (1/(cytosol_55))*(V1a_free_55 - V1a_bind_55 - V1a_ns_55);


% Cell56
% Species:   id = CaI
xdot(276) = (1/(cytosol_56))*(JChannel_56 - JPump_56);

% Species:   id = IP3
xdot(277) = (1/(cytosol_56))*(kPLC_56 - kPhosphatase_56 - IP3_ex_56);

% Species:   id = CaT
xdot(278) = (1/(ER_store_56))*(-JChannel_56 + JPump_56);

% Species:   id = g, species = IP3R
xdot(279) = (1/(cytosol_56))*(IP3R_inh_56- IP3R_act_56);

% Species:   id = r
xdot(280) = (1/(cytosol_56))*(V1a_free_56 - V1a_bind_56 - V1a_ns_56);


% Cell57
% Species:   id = CaI
xdot(281) = (1/(cytosol_57))*(JChannel_57 - JPump_57);

% Species:   id = IP3
xdot(282) = (1/(cytosol_57))*(kPLC_57 - kPhosphatase_57 - IP3_ex_57);

% Species:   id = CaT
xdot(283) = (1/(ER_store_57))*(-JChannel_57 + JPump_57);

% Species:   id = g, species = IP3R
xdot(284) = (1/(cytosol_57))*(IP3R_inh_57- IP3R_act_57);

% Species:   id = r
xdot(285) = (1/(cytosol_57))*(V1a_free_57 - V1a_bind_57 - V1a_ns_57);


% Cell58
% Species:   id = CaI
xdot(286) = (1/(cytosol_58))*(JChannel_58 - JPump_58);

% Species:   id = IP3
xdot(287) = (1/(cytosol_58))*(kPLC_58 - kPhosphatase_58 - IP3_ex_58);

% Species:   id = CaT
xdot(288) = (1/(ER_store_58))*(-JChannel_58 + JPump_58);

% Species:   id = g, species = IP3R
xdot(289) = (1/(cytosol_58))*(IP3R_inh_58- IP3R_act_58);

% Species:   id = r
xdot(290) = (1/(cytosol_58))*(V1a_free_58 - V1a_bind_58 - V1a_ns_58);


% Cell59
% Species:   id = CaI
xdot(291) = (1/(cytosol_59))*(JChannel_59 - JPump_59);

% Species:   id = IP3
xdot(292) = (1/(cytosol_59))*(kPLC_59 - kPhosphatase_59 - IP3_ex_59);

% Species:   id = CaT
xdot(293) = (1/(ER_store_59))*(-JChannel_59 + JPump_59);

% Species:   id = g, species = IP3R
xdot(294) = (1/(cytosol_59))*(IP3R_inh_59- IP3R_act_59);

% Species:   id = r
xdot(295) = (1/(cytosol_59))*(V1a_free_59 - V1a_bind_59 - V1a_ns_59);


% Cell60
% Species:   id = CaI
xdot(296) = (1/(cytosol_60))*(JChannel_60 - JPump_60);

% Species:   id = IP3
xdot(297) = (1/(cytosol_60))*(kPLC_60 - kPhosphatase_60 - IP3_ex_60);

% Species:   id = CaT
xdot(298) = (1/(ER_store_60))*(-JChannel_60 + JPump_60);

% Species:   id = g, species = IP3R
xdot(299) = (1/(cytosol_60))*(IP3R_inh_60- IP3R_act_60);

% Species:   id = r
xdot(300) = (1/(cytosol_60))*(V1a_free_60 - V1a_bind_60 - V1a_ns_60);


% Cell61
% Species:   id = CaI
xdot(301) = (1/(cytosol_61))*(JChannel_61 - JPump_61);

% Species:   id = IP3
xdot(302) = (1/(cytosol_61))*(kPLC_61 - kPhosphatase_61 - IP3_ex_61);

% Species:   id = CaT
xdot(303) = (1/(ER_store_61))*(-JChannel_61 + JPump_61);

% Species:   id = g, species = IP3R
xdot(304) = (1/(cytosol_61))*(IP3R_inh_61- IP3R_act_61);

% Species:   id = r
xdot(305) = (1/(cytosol_61))*(V1a_free_61 - V1a_bind_61 - V1a_ns_61);


% Cell62
% Species:   id = CaI
xdot(306) = (1/(cytosol_62))*(JChannel_62 - JPump_62);

% Species:   id = IP3
xdot(307) = (1/(cytosol_62))*(kPLC_62 - kPhosphatase_62 - IP3_ex_62);

% Species:   id = CaT
xdot(308) = (1/(ER_store_62))*(-JChannel_62 + JPump_62);

% Species:   id = g, species = IP3R
xdot(309) = (1/(cytosol_62))*(IP3R_inh_62- IP3R_act_62);

% Species:   id = r
xdot(310) = (1/(cytosol_62))*(V1a_free_62 - V1a_bind_62 - V1a_ns_62);


% Cell63
% Species:   id = CaI
xdot(311) = (1/(cytosol_63))*(JChannel_63 - JPump_63);

% Species:   id = IP3
xdot(312) = (1/(cytosol_63))*(kPLC_63 - kPhosphatase_63 - IP3_ex_63);

% Species:   id = CaT
xdot(313) = (1/(ER_store_63))*(-JChannel_63 + JPump_63);

% Species:   id = g, species = IP3R
xdot(314) = (1/(cytosol_63))*(IP3R_inh_63- IP3R_act_63);

% Species:   id = r
xdot(315) = (1/(cytosol_63))*(V1a_free_63 - V1a_bind_63 - V1a_ns_63);


% Cell64
% Species:   id = CaI
xdot(316) = (1/(cytosol_64))*(JChannel_64 - JPump_64);

% Species:   id = IP3
xdot(317) = (1/(cytosol_64))*(kPLC_64 - kPhosphatase_64 - IP3_ex_64);

% Species:   id = CaT
xdot(318) = (1/(ER_store_64))*(-JChannel_64 + JPump_64);

% Species:   id = g, species = IP3R
xdot(319) = (1/(cytosol_64))*(IP3R_inh_64- IP3R_act_64);

% Species:   id = r
xdot(320) = (1/(cytosol_64))*(V1a_free_64 - V1a_bind_64 - V1a_ns_64);


% Cell65
% Species:   id = CaI
xdot(321) = (1/(cytosol_65))*(JChannel_65 - JPump_65);

% Species:   id = IP3
xdot(322) = (1/(cytosol_65))*(kPLC_65 - kPhosphatase_65 - IP3_ex_65);

% Species:   id = CaT
xdot(323) = (1/(ER_store_65))*(-JChannel_65 + JPump_65);

% Species:   id = g, species = IP3R
xdot(324) = (1/(cytosol_65))*(IP3R_inh_65- IP3R_act_65);

% Species:   id = r
xdot(325) = (1/(cytosol_65))*(V1a_free_65 - V1a_bind_65 - V1a_ns_65);


% Cell66
% Species:   id = CaI
xdot(326) = (1/(cytosol_66))*(JChannel_66 - JPump_66);

% Species:   id = IP3
xdot(327) = (1/(cytosol_66))*(kPLC_66 - kPhosphatase_66 - IP3_ex_66);

% Species:   id = CaT
xdot(328) = (1/(ER_store_66))*(-JChannel_66 + JPump_66);

% Species:   id = g, species = IP3R
xdot(329) = (1/(cytosol_66))*(IP3R_inh_66- IP3R_act_66);

% Species:   id = r
xdot(330) = (1/(cytosol_66))*(V1a_free_66 - V1a_bind_66 - V1a_ns_66);


% Cell67
% Species:   id = CaI
xdot(331) = (1/(cytosol_67))*(JChannel_67 - JPump_67);

% Species:   id = IP3
xdot(332) = (1/(cytosol_67))*(kPLC_67 - kPhosphatase_67 - IP3_ex_67);

% Species:   id = CaT
xdot(333) = (1/(ER_store_67))*(-JChannel_67 + JPump_67);

% Species:   id = g, species = IP3R
xdot(334) = (1/(cytosol_67))*(IP3R_inh_67- IP3R_act_67);

% Species:   id = r
xdot(335) = (1/(cytosol_67))*(V1a_free_67 - V1a_bind_67 - V1a_ns_67);


% Cell68
% Species:   id = CaI
xdot(336) = (1/(cytosol_68))*(JChannel_68 - JPump_68);

% Species:   id = IP3
xdot(337) = (1/(cytosol_68))*(kPLC_68 - kPhosphatase_68 - IP3_ex_68);

% Species:   id = CaT
xdot(338) = (1/(ER_store_68))*(-JChannel_68 + JPump_68);

% Species:   id = g, species = IP3R
xdot(339) = (1/(cytosol_68))*(IP3R_inh_68- IP3R_act_68);

% Species:   id = r
xdot(340) = (1/(cytosol_68))*(V1a_free_68 - V1a_bind_68 - V1a_ns_68);


% Cell69
% Species:   id = CaI
xdot(341) = (1/(cytosol_69))*(JChannel_69 - JPump_69);

% Species:   id = IP3
xdot(342) = (1/(cytosol_69))*(kPLC_69 - kPhosphatase_69 - IP3_ex_69);

% Species:   id = CaT
xdot(343) = (1/(ER_store_69))*(-JChannel_69 + JPump_69);

% Species:   id = g, species = IP3R
xdot(344) = (1/(cytosol_69))*(IP3R_inh_69- IP3R_act_69);

% Species:   id = r
xdot(345) = (1/(cytosol_69))*(V1a_free_69 - V1a_bind_69 - V1a_ns_69);


% Cell70
% Species:   id = CaI
xdot(346) = (1/(cytosol_70))*(JChannel_70 - JPump_70);

% Species:   id = IP3
xdot(347) = (1/(cytosol_70))*(kPLC_70 - kPhosphatase_70 - IP3_ex_70);

% Species:   id = CaT
xdot(348) = (1/(ER_store_70))*(-JChannel_70 + JPump_70);

% Species:   id = g, species = IP3R
xdot(349) = (1/(cytosol_70))*(IP3R_inh_70- IP3R_act_70);

% Species:   id = r
xdot(350) = (1/(cytosol_70))*(V1a_free_70 - V1a_bind_70 - V1a_ns_70);


% Cell71
% Species:   id = CaI
xdot(351) = (1/(cytosol_71))*(JChannel_71 - JPump_71);

% Species:   id = IP3
xdot(352) = (1/(cytosol_71))*(kPLC_71 - kPhosphatase_71 - IP3_ex_71);

% Species:   id = CaT
xdot(353) = (1/(ER_store_71))*(-JChannel_71 + JPump_71);

% Species:   id = g, species = IP3R
xdot(354) = (1/(cytosol_71))*(IP3R_inh_71- IP3R_act_71);

% Species:   id = r
xdot(355) = (1/(cytosol_71))*(V1a_free_71 - V1a_bind_71 - V1a_ns_71);


% Cell72
% Species:   id = CaI
xdot(356) = (1/(cytosol_72))*(JChannel_72 - JPump_72);

% Species:   id = IP3
xdot(357) = (1/(cytosol_72))*(kPLC_72 - kPhosphatase_72 - IP3_ex_72);

% Species:   id = CaT
xdot(358) = (1/(ER_store_72))*(-JChannel_72 + JPump_72);

% Species:   id = g, species = IP3R
xdot(359) = (1/(cytosol_72))*(IP3R_inh_72- IP3R_act_72);

% Species:   id = r
xdot(360) = (1/(cytosol_72))*(V1a_free_72 - V1a_bind_72 - V1a_ns_72);


% Cell73
% Species:   id = CaI
xdot(361) = (1/(cytosol_73))*(JChannel_73 - JPump_73);

% Species:   id = IP3
xdot(362) = (1/(cytosol_73))*(kPLC_73 - kPhosphatase_73 - IP3_ex_73);

% Species:   id = CaT
xdot(363) = (1/(ER_store_73))*(-JChannel_73 + JPump_73);

% Species:   id = g, species = IP3R
xdot(364) = (1/(cytosol_73))*(IP3R_inh_73- IP3R_act_73);

% Species:   id = r
xdot(365) = (1/(cytosol_73))*(V1a_free_73 - V1a_bind_73 - V1a_ns_73);


% Cell74
% Species:   id = CaI
xdot(366) = (1/(cytosol_74))*(JChannel_74 - JPump_74);

% Species:   id = IP3
xdot(367) = (1/(cytosol_74))*(kPLC_74 - kPhosphatase_74 - IP3_ex_74);

% Species:   id = CaT
xdot(368) = (1/(ER_store_74))*(-JChannel_74 + JPump_74);

% Species:   id = g, species = IP3R
xdot(369) = (1/(cytosol_74))*(IP3R_inh_74- IP3R_act_74);

% Species:   id = r
xdot(370) = (1/(cytosol_74))*(V1a_free_74 - V1a_bind_74 - V1a_ns_74);


% Cell75
% Species:   id = CaI
xdot(371) = (1/(cytosol_75))*(JChannel_75 - JPump_75);

% Species:   id = IP3
xdot(372) = (1/(cytosol_75))*(kPLC_75 - kPhosphatase_75 - IP3_ex_75);

% Species:   id = CaT
xdot(373) = (1/(ER_store_75))*(-JChannel_75 + JPump_75);

% Species:   id = g, species = IP3R
xdot(374) = (1/(cytosol_75))*(IP3R_inh_75- IP3R_act_75);

% Species:   id = r
xdot(375) = (1/(cytosol_75))*(V1a_free_75 - V1a_bind_75 - V1a_ns_75);


% Cell76
% Species:   id = CaI
xdot(376) = (1/(cytosol_76))*(JChannel_76 - JPump_76);

% Species:   id = IP3
xdot(377) = (1/(cytosol_76))*(kPLC_76 - kPhosphatase_76 - IP3_ex_76);

% Species:   id = CaT
xdot(378) = (1/(ER_store_76))*(-JChannel_76 + JPump_76);

% Species:   id = g, species = IP3R
xdot(379) = (1/(cytosol_76))*(IP3R_inh_76- IP3R_act_76);

% Species:   id = r
xdot(380) = (1/(cytosol_76))*(V1a_free_76 - V1a_bind_76 - V1a_ns_76);


% Cell77
% Species:   id = CaI
xdot(381) = (1/(cytosol_77))*(JChannel_77 - JPump_77);

% Species:   id = IP3
xdot(382) = (1/(cytosol_77))*(kPLC_77 - kPhosphatase_77 - IP3_ex_77);

% Species:   id = CaT
xdot(383) = (1/(ER_store_77))*(-JChannel_77 + JPump_77);

% Species:   id = g, species = IP3R
xdot(384) = (1/(cytosol_77))*(IP3R_inh_77- IP3R_act_77);

% Species:   id = r
xdot(385) = (1/(cytosol_77))*(V1a_free_77 - V1a_bind_77 - V1a_ns_77);


% Cell78
% Species:   id = CaI
xdot(386) = (1/(cytosol_78))*(JChannel_78 - JPump_78);

% Species:   id = IP3
xdot(387) = (1/(cytosol_78))*(kPLC_78 - kPhosphatase_78 - IP3_ex_78);

% Species:   id = CaT
xdot(388) = (1/(ER_store_78))*(-JChannel_78 + JPump_78);

% Species:   id = g, species = IP3R
xdot(389) = (1/(cytosol_78))*(IP3R_inh_78- IP3R_act_78);

% Species:   id = r
xdot(390) = (1/(cytosol_78))*(V1a_free_78 - V1a_bind_78 - V1a_ns_78);


% Cell79
% Species:   id = CaI
xdot(391) = (1/(cytosol_79))*(JChannel_79 - JPump_79);

% Species:   id = IP3
xdot(392) = (1/(cytosol_79))*(kPLC_79 - kPhosphatase_79 - IP3_ex_79);

% Species:   id = CaT
xdot(393) = (1/(ER_store_79))*(-JChannel_79 + JPump_79);

% Species:   id = g, species = IP3R
xdot(394) = (1/(cytosol_79))*(IP3R_inh_79- IP3R_act_79);

% Species:   id = r
xdot(395) = (1/(cytosol_79))*(V1a_free_79 - V1a_bind_79 - V1a_ns_79);


% Cell80
% Species:   id = CaI
xdot(396) = (1/(cytosol_80))*(JChannel_80 - JPump_80);

% Species:   id = IP3
xdot(397) = (1/(cytosol_80))*(kPLC_80 - kPhosphatase_80 - IP3_ex_80);

% Species:   id = CaT
xdot(398) = (1/(ER_store_80))*(-JChannel_80 + JPump_80);

% Species:   id = g, species = IP3R
xdot(399) = (1/(cytosol_80))*(IP3R_inh_80- IP3R_act_80);

% Species:   id = r
xdot(400) = (1/(cytosol_80))*(V1a_free_80 - V1a_bind_80 - V1a_ns_80);


% Cell81
% Species:   id = CaI
xdot(401) = (1/(cytosol_81))*(JChannel_81 - JPump_81);

% Species:   id = IP3
xdot(402) = (1/(cytosol_81))*(kPLC_81 - kPhosphatase_81 - IP3_ex_81);

% Species:   id = CaT
xdot(403) = (1/(ER_store_81))*(-JChannel_81 + JPump_81);

% Species:   id = g, species = IP3R
xdot(404) = (1/(cytosol_81))*(IP3R_inh_81- IP3R_act_81);

% Species:   id = r
xdot(405) = (1/(cytosol_81))*(V1a_free_81 - V1a_bind_81 - V1a_ns_81);


% Cell82
% Species:   id = CaI
xdot(406) = (1/(cytosol_82))*(JChannel_82 - JPump_82);

% Species:   id = IP3
xdot(407) = (1/(cytosol_82))*(kPLC_82 - kPhosphatase_82 - IP3_ex_82);

% Species:   id = CaT
xdot(408) = (1/(ER_store_82))*(-JChannel_82 + JPump_82);

% Species:   id = g, species = IP3R
xdot(409) = (1/(cytosol_82))*(IP3R_inh_82- IP3R_act_82);

% Species:   id = r
xdot(410) = (1/(cytosol_82))*(V1a_free_82 - V1a_bind_82 - V1a_ns_82);


% Cell83
% Species:   id = CaI
xdot(411) = (1/(cytosol_83))*(JChannel_83 - JPump_83);

% Species:   id = IP3
xdot(412) = (1/(cytosol_83))*(kPLC_83 - kPhosphatase_83 - IP3_ex_83);

% Species:   id = CaT
xdot(413) = (1/(ER_store_83))*(-JChannel_83 + JPump_83);

% Species:   id = g, species = IP3R
xdot(414) = (1/(cytosol_83))*(IP3R_inh_83- IP3R_act_83);

% Species:   id = r
xdot(415) = (1/(cytosol_83))*(V1a_free_83 - V1a_bind_83 - V1a_ns_83);


% Cell84
% Species:   id = CaI
xdot(416) = (1/(cytosol_84))*(JChannel_84 - JPump_84);

% Species:   id = IP3
xdot(417) = (1/(cytosol_84))*(kPLC_84 - kPhosphatase_84 - IP3_ex_84);

% Species:   id = CaT
xdot(418) = (1/(ER_store_84))*(-JChannel_84 + JPump_84);

% Species:   id = g, species = IP3R
xdot(419) = (1/(cytosol_84))*(IP3R_inh_84- IP3R_act_84);

% Species:   id = r
xdot(420) = (1/(cytosol_84))*(V1a_free_84 - V1a_bind_84 - V1a_ns_84);


% Cell85
% Species:   id = CaI
xdot(421) = (1/(cytosol_85))*(JChannel_85 - JPump_85);

% Species:   id = IP3
xdot(422) = (1/(cytosol_85))*(kPLC_85 - kPhosphatase_85 - IP3_ex_85);

% Species:   id = CaT
xdot(423) = (1/(ER_store_85))*(-JChannel_85 + JPump_85);

% Species:   id = g, species = IP3R
xdot(424) = (1/(cytosol_85))*(IP3R_inh_85- IP3R_act_85);

% Species:   id = r
xdot(425) = (1/(cytosol_85))*(V1a_free_85 - V1a_bind_85 - V1a_ns_85);


% Cell86
% Species:   id = CaI
xdot(426) = (1/(cytosol_86))*(JChannel_86 - JPump_86);

% Species:   id = IP3
xdot(427) = (1/(cytosol_86))*(kPLC_86 - kPhosphatase_86 - IP3_ex_86);

% Species:   id = CaT
xdot(428) = (1/(ER_store_86))*(-JChannel_86 + JPump_86);

% Species:   id = g, species = IP3R
xdot(429) = (1/(cytosol_86))*(IP3R_inh_86- IP3R_act_86);

% Species:   id = r
xdot(430) = (1/(cytosol_86))*(V1a_free_86 - V1a_bind_86 - V1a_ns_86);


% Cell87
% Species:   id = CaI
xdot(431) = (1/(cytosol_87))*(JChannel_87 - JPump_87);

% Species:   id = IP3
xdot(432) = (1/(cytosol_87))*(kPLC_87 - kPhosphatase_87 - IP3_ex_87);

% Species:   id = CaT
xdot(433) = (1/(ER_store_87))*(-JChannel_87 + JPump_87);

% Species:   id = g, species = IP3R
xdot(434) = (1/(cytosol_87))*(IP3R_inh_87- IP3R_act_87);

% Species:   id = r
xdot(435) = (1/(cytosol_87))*(V1a_free_87 - V1a_bind_87 - V1a_ns_87);


% Cell88
% Species:   id = CaI
xdot(436) = (1/(cytosol_88))*(JChannel_88 - JPump_88);

% Species:   id = IP3
xdot(437) = (1/(cytosol_88))*(kPLC_88 - kPhosphatase_88 - IP3_ex_88);

% Species:   id = CaT
xdot(438) = (1/(ER_store_88))*(-JChannel_88 + JPump_88);

% Species:   id = g, species = IP3R
xdot(439) = (1/(cytosol_88))*(IP3R_inh_88- IP3R_act_88);

% Species:   id = r
xdot(440) = (1/(cytosol_88))*(V1a_free_88 - V1a_bind_88 - V1a_ns_88);


% Cell89
% Species:   id = CaI
xdot(441) = (1/(cytosol_89))*(JChannel_89 - JPump_89);

% Species:   id = IP3
xdot(442) = (1/(cytosol_89))*(kPLC_89 - kPhosphatase_89 - IP3_ex_89);

% Species:   id = CaT
xdot(443) = (1/(ER_store_89))*(-JChannel_89 + JPump_89);

% Species:   id = g, species = IP3R
xdot(444) = (1/(cytosol_89))*(IP3R_inh_89- IP3R_act_89);

% Species:   id = r
xdot(445) = (1/(cytosol_89))*(V1a_free_89 - V1a_bind_89 - V1a_ns_89);


% Cell90
% Species:   id = CaI
xdot(446) = (1/(cytosol_90))*(JChannel_90 - JPump_90);

% Species:   id = IP3
xdot(447) = (1/(cytosol_90))*(kPLC_90 - kPhosphatase_90 - IP3_ex_90);

% Species:   id = CaT
xdot(448) = (1/(ER_store_90))*(-JChannel_90 + JPump_90);

% Species:   id = g, species = IP3R
xdot(449) = (1/(cytosol_90))*(IP3R_inh_90- IP3R_act_90);

% Species:   id = r
xdot(450) = (1/(cytosol_90))*(V1a_free_90 - V1a_bind_90 - V1a_ns_90);


% Cell91
% Species:   id = CaI
xdot(451) = (1/(cytosol_91))*(JChannel_91 - JPump_91);

% Species:   id = IP3
xdot(452) = (1/(cytosol_91))*(kPLC_91 - kPhosphatase_91 - IP3_ex_91);

% Species:   id = CaT
xdot(453) = (1/(ER_store_91))*(-JChannel_91 + JPump_91);

% Species:   id = g, species = IP3R
xdot(454) = (1/(cytosol_91))*(IP3R_inh_91- IP3R_act_91);

% Species:   id = r
xdot(455) = (1/(cytosol_91))*(V1a_free_91 - V1a_bind_91 - V1a_ns_91);


% Cell92
% Species:   id = CaI
xdot(456) = (1/(cytosol_92))*(JChannel_92 - JPump_92);

% Species:   id = IP3
xdot(457) = (1/(cytosol_92))*(kPLC_92 - kPhosphatase_92 - IP3_ex_92);

% Species:   id = CaT
xdot(458) = (1/(ER_store_92))*(-JChannel_92 + JPump_92);

% Species:   id = g, species = IP3R
xdot(459) = (1/(cytosol_92))*(IP3R_inh_92- IP3R_act_92);

% Species:   id = r
xdot(460) = (1/(cytosol_92))*(V1a_free_92 - V1a_bind_92 - V1a_ns_92);


% Cell93
% Species:   id = CaI
xdot(461) = (1/(cytosol_93))*(JChannel_93 - JPump_93);

% Species:   id = IP3
xdot(462) = (1/(cytosol_93))*(kPLC_93 - kPhosphatase_93 - IP3_ex_93);

% Species:   id = CaT
xdot(463) = (1/(ER_store_93))*(-JChannel_93 + JPump_93);

% Species:   id = g, species = IP3R
xdot(464) = (1/(cytosol_93))*(IP3R_inh_93- IP3R_act_93);

% Species:   id = r
xdot(465) = (1/(cytosol_93))*(V1a_free_93 - V1a_bind_93 - V1a_ns_93);


% Cell94
% Species:   id = CaI
xdot(466) = (1/(cytosol_94))*(JChannel_94 - JPump_94);

% Species:   id = IP3
xdot(467) = (1/(cytosol_94))*(kPLC_94 - kPhosphatase_94 - IP3_ex_94);

% Species:   id = CaT
xdot(468) = (1/(ER_store_94))*(-JChannel_94 + JPump_94);

% Species:   id = g, species = IP3R
xdot(469) = (1/(cytosol_94))*(IP3R_inh_94- IP3R_act_94);

% Species:   id = r
xdot(470) = (1/(cytosol_94))*(V1a_free_94 - V1a_bind_94 - V1a_ns_94);


% Cell95
% Species:   id = CaI
xdot(471) = (1/(cytosol_95))*(JChannel_95 - JPump_95);

% Species:   id = IP3
xdot(472) = (1/(cytosol_95))*(kPLC_95 - kPhosphatase_95 - IP3_ex_95);

% Species:   id = CaT
xdot(473) = (1/(ER_store_95))*(-JChannel_95 + JPump_95);

% Species:   id = g, species = IP3R
xdot(474) = (1/(cytosol_95))*(IP3R_inh_95- IP3R_act_95);

% Species:   id = r
xdot(475) = (1/(cytosol_95))*(V1a_free_95 - V1a_bind_95 - V1a_ns_95);


% Cell96
% Species:   id = CaI
xdot(476) = (1/(cytosol_96))*(JChannel_96 - JPump_96);

% Species:   id = IP3
xdot(477) = (1/(cytosol_96))*(kPLC_96 - kPhosphatase_96 - IP3_ex_96);

% Species:   id = CaT
xdot(478) = (1/(ER_store_96))*(-JChannel_96 + JPump_96);

% Species:   id = g, species = IP3R
xdot(479) = (1/(cytosol_96))*(IP3R_inh_96- IP3R_act_96);

% Species:   id = r
xdot(480) = (1/(cytosol_96))*(V1a_free_96 - V1a_bind_96 - V1a_ns_96);


% Cell97
% Species:   id = CaI
xdot(481) = (1/(cytosol_97))*(JChannel_97 - JPump_97);

% Species:   id = IP3
xdot(482) = (1/(cytosol_97))*(kPLC_97 - kPhosphatase_97 - IP3_ex_97);

% Species:   id = CaT
xdot(483) = (1/(ER_store_97))*(-JChannel_97 + JPump_97);

% Species:   id = g, species = IP3R
xdot(484) = (1/(cytosol_97))*(IP3R_inh_97- IP3R_act_97);

% Species:   id = r
xdot(485) = (1/(cytosol_97))*(V1a_free_97 - V1a_bind_97 - V1a_ns_97);


% Cell98
% Species:   id = CaI
xdot(486) = (1/(cytosol_98))*(JChannel_98 - JPump_98);

% Species:   id = IP3
xdot(487) = (1/(cytosol_98))*(kPLC_98 - kPhosphatase_98 - IP3_ex_98);

% Species:   id = CaT
xdot(488) = (1/(ER_store_98))*(-JChannel_98 + JPump_98);

% Species:   id = g, species = IP3R
xdot(489) = (1/(cytosol_98))*(IP3R_inh_98- IP3R_act_98);

% Species:   id = r
xdot(490) = (1/(cytosol_98))*(V1a_free_98 - V1a_bind_98 - V1a_ns_98);


% Cell99
% Species:   id = CaI
xdot(491) = (1/(cytosol_99))*(JChannel_99 - JPump_99);

% Species:   id = IP3
xdot(492) = (1/(cytosol_99))*(kPLC_99 - kPhosphatase_99 - IP3_ex_99);

% Species:   id = CaT
xdot(493) = (1/(ER_store_99))*(-JChannel_99 + JPump_99);

% Species:   id = g, species = IP3R
xdot(494) = (1/(cytosol_99))*(IP3R_inh_99- IP3R_act_99);

% Species:   id = r
xdot(495) = (1/(cytosol_99))*(V1a_free_99 - V1a_bind_99 - V1a_ns_99);


% Cell100
% Species:   id = CaI
xdot(496) = (1/(cytosol_100))*(JChannel_100 - JPump_100);

% Species:   id = IP3
xdot(497) = (1/(cytosol_100))*(kPLC_100 - kPhosphatase_100 - IP3_ex_100);

% Species:   id = CaT
xdot(498) = (1/(ER_store_100))*(-JChannel_100 + JPump_100);

% Species:   id = g, species = IP3R
xdot(499) = (1/(cytosol_100))*(IP3R_inh_100- IP3R_act_100);

% Species:   id = r
xdot(500) = (1/(cytosol_100))*(V1a_free_100 - V1a_bind_100 - V1a_ns_100);


% Cell101
% Species:   id = CaI
xdot(501) = (1/(cytosol_101))*(JChannel_101 - JPump_101);

% Species:   id = IP3
xdot(502) = (1/(cytosol_101))*(kPLC_101 - kPhosphatase_101 - IP3_ex_101);

% Species:   id = CaT
xdot(503) = (1/(ER_store_101))*(-JChannel_101 + JPump_101);

% Species:   id = g, species = IP3R
xdot(504) = (1/(cytosol_101))*(IP3R_inh_101- IP3R_act_101);

% Species:   id = r
xdot(505) = (1/(cytosol_101))*(V1a_free_101 - V1a_bind_101 - V1a_ns_101);


% Cell102
% Species:   id = CaI
xdot(506) = (1/(cytosol_102))*(JChannel_102 - JPump_102);

% Species:   id = IP3
xdot(507) = (1/(cytosol_102))*(kPLC_102 - kPhosphatase_102 - IP3_ex_102);

% Species:   id = CaT
xdot(508) = (1/(ER_store_102))*(-JChannel_102 + JPump_102);

% Species:   id = g, species = IP3R
xdot(509) = (1/(cytosol_102))*(IP3R_inh_102- IP3R_act_102);

% Species:   id = r
xdot(510) = (1/(cytosol_102))*(V1a_free_102 - V1a_bind_102 - V1a_ns_102);


% Cell103
% Species:   id = CaI
xdot(511) = (1/(cytosol_103))*(JChannel_103 - JPump_103);

% Species:   id = IP3
xdot(512) = (1/(cytosol_103))*(kPLC_103 - kPhosphatase_103 - IP3_ex_103);

% Species:   id = CaT
xdot(513) = (1/(ER_store_103))*(-JChannel_103 + JPump_103);

% Species:   id = g, species = IP3R
xdot(514) = (1/(cytosol_103))*(IP3R_inh_103- IP3R_act_103);

% Species:   id = r
xdot(515) = (1/(cytosol_103))*(V1a_free_103 - V1a_bind_103 - V1a_ns_103);


% Cell104
% Species:   id = CaI
xdot(516) = (1/(cytosol_104))*(JChannel_104 - JPump_104);

% Species:   id = IP3
xdot(517) = (1/(cytosol_104))*(kPLC_104 - kPhosphatase_104 - IP3_ex_104);

% Species:   id = CaT
xdot(518) = (1/(ER_store_104))*(-JChannel_104 + JPump_104);

% Species:   id = g, species = IP3R
xdot(519) = (1/(cytosol_104))*(IP3R_inh_104- IP3R_act_104);

% Species:   id = r
xdot(520) = (1/(cytosol_104))*(V1a_free_104 - V1a_bind_104 - V1a_ns_104);


% Cell105
% Species:   id = CaI
xdot(521) = (1/(cytosol_105))*(JChannel_105 - JPump_105);

% Species:   id = IP3
xdot(522) = (1/(cytosol_105))*(kPLC_105 - kPhosphatase_105 - IP3_ex_105);

% Species:   id = CaT
xdot(523) = (1/(ER_store_105))*(-JChannel_105 + JPump_105);

% Species:   id = g, species = IP3R
xdot(524) = (1/(cytosol_105))*(IP3R_inh_105- IP3R_act_105);

% Species:   id = r
xdot(525) = (1/(cytosol_105))*(V1a_free_105 - V1a_bind_105 - V1a_ns_105);


% Cell106
% Species:   id = CaI
xdot(526) = (1/(cytosol_106))*(JChannel_106 - JPump_106);

% Species:   id = IP3
xdot(527) = (1/(cytosol_106))*(kPLC_106 - kPhosphatase_106 - IP3_ex_106);

% Species:   id = CaT
xdot(528) = (1/(ER_store_106))*(-JChannel_106 + JPump_106);

% Species:   id = g, species = IP3R
xdot(529) = (1/(cytosol_106))*(IP3R_inh_106- IP3R_act_106);

% Species:   id = r
xdot(530) = (1/(cytosol_106))*(V1a_free_106 - V1a_bind_106 - V1a_ns_106);


% Cell107
% Species:   id = CaI
xdot(531) = (1/(cytosol_107))*(JChannel_107 - JPump_107);

% Species:   id = IP3
xdot(532) = (1/(cytosol_107))*(kPLC_107 - kPhosphatase_107 - IP3_ex_107);

% Species:   id = CaT
xdot(533) = (1/(ER_store_107))*(-JChannel_107 + JPump_107);

% Species:   id = g, species = IP3R
xdot(534) = (1/(cytosol_107))*(IP3R_inh_107- IP3R_act_107);

% Species:   id = r
xdot(535) = (1/(cytosol_107))*(V1a_free_107 - V1a_bind_107 - V1a_ns_107);


% Cell108
% Species:   id = CaI
xdot(536) = (1/(cytosol_108))*(JChannel_108 - JPump_108);

% Species:   id = IP3
xdot(537) = (1/(cytosol_108))*(kPLC_108 - kPhosphatase_108 - IP3_ex_108);

% Species:   id = CaT
xdot(538) = (1/(ER_store_108))*(-JChannel_108 + JPump_108);

% Species:   id = g, species = IP3R
xdot(539) = (1/(cytosol_108))*(IP3R_inh_108- IP3R_act_108);

% Species:   id = r
xdot(540) = (1/(cytosol_108))*(V1a_free_108 - V1a_bind_108 - V1a_ns_108);


% Cell109
% Species:   id = CaI
xdot(541) = (1/(cytosol_109))*(JChannel_109 - JPump_109);

% Species:   id = IP3
xdot(542) = (1/(cytosol_109))*(kPLC_109 - kPhosphatase_109 - IP3_ex_109);

% Species:   id = CaT
xdot(543) = (1/(ER_store_109))*(-JChannel_109 + JPump_109);

% Species:   id = g, species = IP3R
xdot(544) = (1/(cytosol_109))*(IP3R_inh_109- IP3R_act_109);

% Species:   id = r
xdot(545) = (1/(cytosol_109))*(V1a_free_109 - V1a_bind_109 - V1a_ns_109);


% Cell110
% Species:   id = CaI
xdot(546) = (1/(cytosol_110))*(JChannel_110 - JPump_110);

% Species:   id = IP3
xdot(547) = (1/(cytosol_110))*(kPLC_110 - kPhosphatase_110 - IP3_ex_110);

% Species:   id = CaT
xdot(548) = (1/(ER_store_110))*(-JChannel_110 + JPump_110);

% Species:   id = g, species = IP3R
xdot(549) = (1/(cytosol_110))*(IP3R_inh_110- IP3R_act_110);

% Species:   id = r
xdot(550) = (1/(cytosol_110))*(V1a_free_110 - V1a_bind_110 - V1a_ns_110);


% Cell111
% Species:   id = CaI
xdot(551) = (1/(cytosol_111))*(JChannel_111 - JPump_111);

% Species:   id = IP3
xdot(552) = (1/(cytosol_111))*(kPLC_111 - kPhosphatase_111 - IP3_ex_111);

% Species:   id = CaT
xdot(553) = (1/(ER_store_111))*(-JChannel_111 + JPump_111);

% Species:   id = g, species = IP3R
xdot(554) = (1/(cytosol_111))*(IP3R_inh_111- IP3R_act_111);

% Species:   id = r
xdot(555) = (1/(cytosol_111))*(V1a_free_111 - V1a_bind_111 - V1a_ns_111);


% Cell112
% Species:   id = CaI
xdot(556) = (1/(cytosol_112))*(JChannel_112 - JPump_112);

% Species:   id = IP3
xdot(557) = (1/(cytosol_112))*(kPLC_112 - kPhosphatase_112 - IP3_ex_112);

% Species:   id = CaT
xdot(558) = (1/(ER_store_112))*(-JChannel_112 + JPump_112);

% Species:   id = g, species = IP3R
xdot(559) = (1/(cytosol_112))*(IP3R_inh_112- IP3R_act_112);

% Species:   id = r
xdot(560) = (1/(cytosol_112))*(V1a_free_112 - V1a_bind_112 - V1a_ns_112);


% Cell113
% Species:   id = CaI
xdot(561) = (1/(cytosol_113))*(JChannel_113 - JPump_113);

% Species:   id = IP3
xdot(562) = (1/(cytosol_113))*(kPLC_113 - kPhosphatase_113 - IP3_ex_113);

% Species:   id = CaT
xdot(563) = (1/(ER_store_113))*(-JChannel_113 + JPump_113);

% Species:   id = g, species = IP3R
xdot(564) = (1/(cytosol_113))*(IP3R_inh_113- IP3R_act_113);

% Species:   id = r
xdot(565) = (1/(cytosol_113))*(V1a_free_113 - V1a_bind_113 - V1a_ns_113);


% Cell114
% Species:   id = CaI
xdot(566) = (1/(cytosol_114))*(JChannel_114 - JPump_114);

% Species:   id = IP3
xdot(567) = (1/(cytosol_114))*(kPLC_114 - kPhosphatase_114 - IP3_ex_114);

% Species:   id = CaT
xdot(568) = (1/(ER_store_114))*(-JChannel_114 + JPump_114);

% Species:   id = g, species = IP3R
xdot(569) = (1/(cytosol_114))*(IP3R_inh_114- IP3R_act_114);

% Species:   id = r
xdot(570) = (1/(cytosol_114))*(V1a_free_114 - V1a_bind_114 - V1a_ns_114);


% Cell115
% Species:   id = CaI
xdot(571) = (1/(cytosol_115))*(JChannel_115 - JPump_115);

% Species:   id = IP3
xdot(572) = (1/(cytosol_115))*(kPLC_115 - kPhosphatase_115 - IP3_ex_115);

% Species:   id = CaT
xdot(573) = (1/(ER_store_115))*(-JChannel_115 + JPump_115);

% Species:   id = g, species = IP3R
xdot(574) = (1/(cytosol_115))*(IP3R_inh_115- IP3R_act_115);

% Species:   id = r
xdot(575) = (1/(cytosol_115))*(V1a_free_115 - V1a_bind_115 - V1a_ns_115);


% Cell116
% Species:   id = CaI
xdot(576) = (1/(cytosol_116))*(JChannel_116 - JPump_116);

% Species:   id = IP3
xdot(577) = (1/(cytosol_116))*(kPLC_116 - kPhosphatase_116 - IP3_ex_116);

% Species:   id = CaT
xdot(578) = (1/(ER_store_116))*(-JChannel_116 + JPump_116);

% Species:   id = g, species = IP3R
xdot(579) = (1/(cytosol_116))*(IP3R_inh_116- IP3R_act_116);

% Species:   id = r
xdot(580) = (1/(cytosol_116))*(V1a_free_116 - V1a_bind_116 - V1a_ns_116);


% Cell117
% Species:   id = CaI
xdot(581) = (1/(cytosol_117))*(JChannel_117 - JPump_117);

% Species:   id = IP3
xdot(582) = (1/(cytosol_117))*(kPLC_117 - kPhosphatase_117 - IP3_ex_117);

% Species:   id = CaT
xdot(583) = (1/(ER_store_117))*(-JChannel_117 + JPump_117);

% Species:   id = g, species = IP3R
xdot(584) = (1/(cytosol_117))*(IP3R_inh_117- IP3R_act_117);

% Species:   id = r
xdot(585) = (1/(cytosol_117))*(V1a_free_117 - V1a_bind_117 - V1a_ns_117);


% Cell118
% Species:   id = CaI
xdot(586) = (1/(cytosol_118))*(JChannel_118 - JPump_118);

% Species:   id = IP3
xdot(587) = (1/(cytosol_118))*(kPLC_118 - kPhosphatase_118 - IP3_ex_118);

% Species:   id = CaT
xdot(588) = (1/(ER_store_118))*(-JChannel_118 + JPump_118);

% Species:   id = g, species = IP3R
xdot(589) = (1/(cytosol_118))*(IP3R_inh_118- IP3R_act_118);

% Species:   id = r
xdot(590) = (1/(cytosol_118))*(V1a_free_118 - V1a_bind_118 - V1a_ns_118);


% Cell119
% Species:   id = CaI
xdot(591) = (1/(cytosol_119))*(JChannel_119 - JPump_119);

% Species:   id = IP3
xdot(592) = (1/(cytosol_119))*(kPLC_119 - kPhosphatase_119 - IP3_ex_119);

% Species:   id = CaT
xdot(593) = (1/(ER_store_119))*(-JChannel_119 + JPump_119);

% Species:   id = g, species = IP3R
xdot(594) = (1/(cytosol_119))*(IP3R_inh_119- IP3R_act_119);

% Species:   id = r
xdot(595) = (1/(cytosol_119))*(V1a_free_119 - V1a_bind_119 - V1a_ns_119);


% Cell120
% Species:   id = CaI
xdot(596) = (1/(cytosol_120))*(JChannel_120 - JPump_120);

% Species:   id = IP3
xdot(597) = (1/(cytosol_120))*(kPLC_120 - kPhosphatase_120 - IP3_ex_120);

% Species:   id = CaT
xdot(598) = (1/(ER_store_120))*(-JChannel_120 + JPump_120);

% Species:   id = g, species = IP3R
xdot(599) = (1/(cytosol_120))*(IP3R_inh_120- IP3R_act_120);

% Species:   id = r
xdot(600) = (1/(cytosol_120))*(V1a_free_120 - V1a_bind_120 - V1a_ns_120);


% Cell121
% Species:   id = CaI
xdot(601) = (1/(cytosol_121))*(JChannel_121 - JPump_121);

% Species:   id = IP3
xdot(602) = (1/(cytosol_121))*(kPLC_121 - kPhosphatase_121 - IP3_ex_121);

% Species:   id = CaT
xdot(603) = (1/(ER_store_121))*(-JChannel_121 + JPump_121);

% Species:   id = g, species = IP3R
xdot(604) = (1/(cytosol_121))*(IP3R_inh_121- IP3R_act_121);

% Species:   id = r
xdot(605) = (1/(cytosol_121))*(V1a_free_121 - V1a_bind_121 - V1a_ns_121);


% Cell122
% Species:   id = CaI
xdot(606) = (1/(cytosol_122))*(JChannel_122 - JPump_122);

% Species:   id = IP3
xdot(607) = (1/(cytosol_122))*(kPLC_122 - kPhosphatase_122 - IP3_ex_122);

% Species:   id = CaT
xdot(608) = (1/(ER_store_122))*(-JChannel_122 + JPump_122);

% Species:   id = g, species = IP3R
xdot(609) = (1/(cytosol_122))*(IP3R_inh_122- IP3R_act_122);

% Species:   id = r
xdot(610) = (1/(cytosol_122))*(V1a_free_122 - V1a_bind_122 - V1a_ns_122);


% Cell123
% Species:   id = CaI
xdot(611) = (1/(cytosol_123))*(JChannel_123 - JPump_123);

% Species:   id = IP3
xdot(612) = (1/(cytosol_123))*(kPLC_123 - kPhosphatase_123 - IP3_ex_123);

% Species:   id = CaT
xdot(613) = (1/(ER_store_123))*(-JChannel_123 + JPump_123);

% Species:   id = g, species = IP3R
xdot(614) = (1/(cytosol_123))*(IP3R_inh_123- IP3R_act_123);

% Species:   id = r
xdot(615) = (1/(cytosol_123))*(V1a_free_123 - V1a_bind_123 - V1a_ns_123);


% Cell124
% Species:   id = CaI
xdot(616) = (1/(cytosol_124))*(JChannel_124 - JPump_124);

% Species:   id = IP3
xdot(617) = (1/(cytosol_124))*(kPLC_124 - kPhosphatase_124 - IP3_ex_124);

% Species:   id = CaT
xdot(618) = (1/(ER_store_124))*(-JChannel_124 + JPump_124);

% Species:   id = g, species = IP3R
xdot(619) = (1/(cytosol_124))*(IP3R_inh_124- IP3R_act_124);

% Species:   id = r
xdot(620) = (1/(cytosol_124))*(V1a_free_124 - V1a_bind_124 - V1a_ns_124);


% Cell125
% Species:   id = CaI
xdot(621) = (1/(cytosol_125))*(JChannel_125 - JPump_125);

% Species:   id = IP3
xdot(622) = (1/(cytosol_125))*(kPLC_125 - kPhosphatase_125 - IP3_ex_125);

% Species:   id = CaT
xdot(623) = (1/(ER_store_125))*(-JChannel_125 + JPump_125);

% Species:   id = g, species = IP3R
xdot(624) = (1/(cytosol_125))*(IP3R_inh_125- IP3R_act_125);

% Species:   id = r
xdot(625) = (1/(cytosol_125))*(V1a_free_125 - V1a_bind_125 - V1a_ns_125);


% Cell126
% Species:   id = CaI
xdot(626) = (1/(cytosol_126))*(JChannel_126 - JPump_126);

% Species:   id = IP3
xdot(627) = (1/(cytosol_126))*(kPLC_126 - kPhosphatase_126 - IP3_ex_126);

% Species:   id = CaT
xdot(628) = (1/(ER_store_126))*(-JChannel_126 + JPump_126);

% Species:   id = g, species = IP3R
xdot(629) = (1/(cytosol_126))*(IP3R_inh_126- IP3R_act_126);

% Species:   id = r
xdot(630) = (1/(cytosol_126))*(V1a_free_126 - V1a_bind_126 - V1a_ns_126);


% Cell127
% Species:   id = CaI
xdot(631) = (1/(cytosol_127))*(JChannel_127 - JPump_127);

% Species:   id = IP3
xdot(632) = (1/(cytosol_127))*(kPLC_127 - kPhosphatase_127 - IP3_ex_127);

% Species:   id = CaT
xdot(633) = (1/(ER_store_127))*(-JChannel_127 + JPump_127);

% Species:   id = g, species = IP3R
xdot(634) = (1/(cytosol_127))*(IP3R_inh_127- IP3R_act_127);

% Species:   id = r
xdot(635) = (1/(cytosol_127))*(V1a_free_127 - V1a_bind_127 - V1a_ns_127);


% Cell128
% Species:   id = CaI
xdot(636) = (1/(cytosol_128))*(JChannel_128 - JPump_128);

% Species:   id = IP3
xdot(637) = (1/(cytosol_128))*(kPLC_128 - kPhosphatase_128 - IP3_ex_128);

% Species:   id = CaT
xdot(638) = (1/(ER_store_128))*(-JChannel_128 + JPump_128);

% Species:   id = g, species = IP3R
xdot(639) = (1/(cytosol_128))*(IP3R_inh_128- IP3R_act_128);

% Species:   id = r
xdot(640) = (1/(cytosol_128))*(V1a_free_128 - V1a_bind_128 - V1a_ns_128);


% Cell129
% Species:   id = CaI
xdot(641) = (1/(cytosol_129))*(JChannel_129 - JPump_129);

% Species:   id = IP3
xdot(642) = (1/(cytosol_129))*(kPLC_129 - kPhosphatase_129 - IP3_ex_129);

% Species:   id = CaT
xdot(643) = (1/(ER_store_129))*(-JChannel_129 + JPump_129);

% Species:   id = g, species = IP3R
xdot(644) = (1/(cytosol_129))*(IP3R_inh_129- IP3R_act_129);

% Species:   id = r
xdot(645) = (1/(cytosol_129))*(V1a_free_129 - V1a_bind_129 - V1a_ns_129);


% Cell130
% Species:   id = CaI
xdot(646) = (1/(cytosol_130))*(JChannel_130 - JPump_130);

% Species:   id = IP3
xdot(647) = (1/(cytosol_130))*(kPLC_130 - kPhosphatase_130 - IP3_ex_130);

% Species:   id = CaT
xdot(648) = (1/(ER_store_130))*(-JChannel_130 + JPump_130);

% Species:   id = g, species = IP3R
xdot(649) = (1/(cytosol_130))*(IP3R_inh_130- IP3R_act_130);

% Species:   id = r
xdot(650) = (1/(cytosol_130))*(V1a_free_130 - V1a_bind_130 - V1a_ns_130);


% Cell131
% Species:   id = CaI
xdot(651) = (1/(cytosol_131))*(JChannel_131 - JPump_131);

% Species:   id = IP3
xdot(652) = (1/(cytosol_131))*(kPLC_131 - kPhosphatase_131 - IP3_ex_131);

% Species:   id = CaT
xdot(653) = (1/(ER_store_131))*(-JChannel_131 + JPump_131);

% Species:   id = g, species = IP3R
xdot(654) = (1/(cytosol_131))*(IP3R_inh_131- IP3R_act_131);

% Species:   id = r
xdot(655) = (1/(cytosol_131))*(V1a_free_131 - V1a_bind_131 - V1a_ns_131);


% Cell132
% Species:   id = CaI
xdot(656) = (1/(cytosol_132))*(JChannel_132 - JPump_132);

% Species:   id = IP3
xdot(657) = (1/(cytosol_132))*(kPLC_132 - kPhosphatase_132 - IP3_ex_132);

% Species:   id = CaT
xdot(658) = (1/(ER_store_132))*(-JChannel_132 + JPump_132);

% Species:   id = g, species = IP3R
xdot(659) = (1/(cytosol_132))*(IP3R_inh_132- IP3R_act_132);

% Species:   id = r
xdot(660) = (1/(cytosol_132))*(V1a_free_132 - V1a_bind_132 - V1a_ns_132);


% Cell133
% Species:   id = CaI
xdot(661) = (1/(cytosol_133))*(JChannel_133 - JPump_133);

% Species:   id = IP3
xdot(662) = (1/(cytosol_133))*(kPLC_133 - kPhosphatase_133 - IP3_ex_133);

% Species:   id = CaT
xdot(663) = (1/(ER_store_133))*(-JChannel_133 + JPump_133);

% Species:   id = g, species = IP3R
xdot(664) = (1/(cytosol_133))*(IP3R_inh_133- IP3R_act_133);

% Species:   id = r
xdot(665) = (1/(cytosol_133))*(V1a_free_133 - V1a_bind_133 - V1a_ns_133);


% Cell134
% Species:   id = CaI
xdot(666) = (1/(cytosol_134))*(JChannel_134 - JPump_134);

% Species:   id = IP3
xdot(667) = (1/(cytosol_134))*(kPLC_134 - kPhosphatase_134 - IP3_ex_134);

% Species:   id = CaT
xdot(668) = (1/(ER_store_134))*(-JChannel_134 + JPump_134);

% Species:   id = g, species = IP3R
xdot(669) = (1/(cytosol_134))*(IP3R_inh_134- IP3R_act_134);

% Species:   id = r
xdot(670) = (1/(cytosol_134))*(V1a_free_134 - V1a_bind_134 - V1a_ns_134);


% Cell135
% Species:   id = CaI
xdot(671) = (1/(cytosol_135))*(JChannel_135 - JPump_135);

% Species:   id = IP3
xdot(672) = (1/(cytosol_135))*(kPLC_135 - kPhosphatase_135 - IP3_ex_135);

% Species:   id = CaT
xdot(673) = (1/(ER_store_135))*(-JChannel_135 + JPump_135);

% Species:   id = g, species = IP3R
xdot(674) = (1/(cytosol_135))*(IP3R_inh_135- IP3R_act_135);

% Species:   id = r
xdot(675) = (1/(cytosol_135))*(V1a_free_135 - V1a_bind_135 - V1a_ns_135);


% Cell136
% Species:   id = CaI
xdot(676) = (1/(cytosol_136))*(JChannel_136 - JPump_136);

% Species:   id = IP3
xdot(677) = (1/(cytosol_136))*(kPLC_136 - kPhosphatase_136 - IP3_ex_136);

% Species:   id = CaT
xdot(678) = (1/(ER_store_136))*(-JChannel_136 + JPump_136);

% Species:   id = g, species = IP3R
xdot(679) = (1/(cytosol_136))*(IP3R_inh_136- IP3R_act_136);

% Species:   id = r
xdot(680) = (1/(cytosol_136))*(V1a_free_136 - V1a_bind_136 - V1a_ns_136);


% Cell137
% Species:   id = CaI
xdot(681) = (1/(cytosol_137))*(JChannel_137 - JPump_137);

% Species:   id = IP3
xdot(682) = (1/(cytosol_137))*(kPLC_137 - kPhosphatase_137 - IP3_ex_137);

% Species:   id = CaT
xdot(683) = (1/(ER_store_137))*(-JChannel_137 + JPump_137);

% Species:   id = g, species = IP3R
xdot(684) = (1/(cytosol_137))*(IP3R_inh_137- IP3R_act_137);

% Species:   id = r
xdot(685) = (1/(cytosol_137))*(V1a_free_137 - V1a_bind_137 - V1a_ns_137);


% Cell138
% Species:   id = CaI
xdot(686) = (1/(cytosol_138))*(JChannel_138 - JPump_138);

% Species:   id = IP3
xdot(687) = (1/(cytosol_138))*(kPLC_138 - kPhosphatase_138 - IP3_ex_138);

% Species:   id = CaT
xdot(688) = (1/(ER_store_138))*(-JChannel_138 + JPump_138);

% Species:   id = g, species = IP3R
xdot(689) = (1/(cytosol_138))*(IP3R_inh_138- IP3R_act_138);

% Species:   id = r
xdot(690) = (1/(cytosol_138))*(V1a_free_138 - V1a_bind_138 - V1a_ns_138);


% Cell139
% Species:   id = CaI
xdot(691) = (1/(cytosol_139))*(JChannel_139 - JPump_139);

% Species:   id = IP3
xdot(692) = (1/(cytosol_139))*(kPLC_139 - kPhosphatase_139 - IP3_ex_139);

% Species:   id = CaT
xdot(693) = (1/(ER_store_139))*(-JChannel_139 + JPump_139);

% Species:   id = g, species = IP3R
xdot(694) = (1/(cytosol_139))*(IP3R_inh_139- IP3R_act_139);

% Species:   id = r
xdot(695) = (1/(cytosol_139))*(V1a_free_139 - V1a_bind_139 - V1a_ns_139);


% Cell140
% Species:   id = CaI
xdot(696) = (1/(cytosol_140))*(JChannel_140 - JPump_140);

% Species:   id = IP3
xdot(697) = (1/(cytosol_140))*(kPLC_140 - kPhosphatase_140 - IP3_ex_140);

% Species:   id = CaT
xdot(698) = (1/(ER_store_140))*(-JChannel_140 + JPump_140);

% Species:   id = g, species = IP3R
xdot(699) = (1/(cytosol_140))*(IP3R_inh_140- IP3R_act_140);

% Species:   id = r
xdot(700) = (1/(cytosol_140))*(V1a_free_140 - V1a_bind_140 - V1a_ns_140);


% Cell141
% Species:   id = CaI
xdot(701) = (1/(cytosol_141))*(JChannel_141 - JPump_141);

% Species:   id = IP3
xdot(702) = (1/(cytosol_141))*(kPLC_141 - kPhosphatase_141 - IP3_ex_141);

% Species:   id = CaT
xdot(703) = (1/(ER_store_141))*(-JChannel_141 + JPump_141);

% Species:   id = g, species = IP3R
xdot(704) = (1/(cytosol_141))*(IP3R_inh_141- IP3R_act_141);

% Species:   id = r
xdot(705) = (1/(cytosol_141))*(V1a_free_141 - V1a_bind_141 - V1a_ns_141);
