# Supplementary material for: Causality Analysis and Cell Network Modeling of Spatial Calcium Signaling Patterns in Liver Lobules
Source: Front Physiol. 2018 Oct 4;9:1377. doi: 10.3389/fphys.2018.01377 (PMC6180170; doi:10.3389/fphys.2018.01377)
Supplement: Supplementary file 1 [file Data_Sheet_1.ZIP › Vadigepalli-Supplementary-Data-Code/Ca_waves_reproduced.m]

%Independently reproduced code for Ca2+ wave propagation
% Author: Madhur Parihar

% Requires:
% 1) Parameter vector k_r (argument VarName1)
% 2) Parameter vector k_ip3 (argument VarName2)
% 3) The adjacency matrix (argument adjacency)

% NOTE: G = 0 to switch gap junctions OFF and G = 0.9 to switch gap
%       junctions ON

% To run: my_output = Ca_waves_reproduced(k_r,k_ip3_adjacency);

function [data_out] = Ca_waves_reproduced(VarName1,VarName2,adjacency)

x0    = zeros(141,5);
x0(:,1) = 0.5;  %r
x0(:,2) = 0.1;  %IP3
x0(:,3) = 0.2;  %Cai
x0(:,4) = 0.25; %g
x0(:,5) = 500;  %Cat


tt = 1:1200;

% Call ODE solver
[t,x] = ode15s(@(t,x)odefun(t,x,x0,VarName1,VarName2,adjacency), tt, x0);

data_out = [tt',x(:,283:423)];

end


%% ODE Function to solve
function dxdt = odefun(t,x,x0,VarName1,VarName2,adjacency)
% Set variable names
adj = adjacency;
r    = x(1:141);
IP3  = x(142:282);
Cai  = x(283:423);
g    = x(424:564);
Cat  = x(565:705);


k_r   = VarName1; %1-2 per second 
k_IP3 = VarName2;% 0.7-0.9 *10e4 uM per second
k_d   = 0.34;%per second
k_hr  = 1;%M-second


k_cat = 0.45;%
k1    = 0.5; %uM
k2    = 0.15;%uM
k3    = 1;   %uM

D     = 1.6;%per second
A     = 0.20;%uM per second
L     = 0.00015;%uM per second
B     = 0.082;% uM per second
E     = 1;%(um)^4-second
F     = 0.01;% per second

%G     = 0; %Gap junctions OFF
G     = 0.9; %Gap junctions ON

if t>200
   H = 1.8; % *10e-10 M
else
   H=0;
end

% Calculate reaction rates for each i
r1 = k_r.*(1-r);
r2 = k_d*r;
r3 = k_hr*H*r;
r4 = (k_IP3.*H.*r./(k_cat+r)) .*(1 - k3./(Cai+k3));
r5 = D*IP3/2;
r6 = zeros(141,1);
IP3_all = x(142:282);
for i = 1:141
       r6(i,1)= sum((IP3_all(i)-IP3_all) .*adj(i,:)'*G);
end

r7 = (1-g) .*( ((A*(IP3/2).^4) ./((k1+IP3/2).^4))  +L ) .*(Cat - Cai);
r8 = (B*(Cai).^2)./((k2)^2+(Cai.^2));
r9 = E*(Cai.^4).*(1-g);

dxdt(1  :141) = r1 - r2 - r3    ;% r
dxdt(142:282) = r4 - r5 -r6     ;% IP3
dxdt(283:423) = r7 - r8         ;% Cai
dxdt(424:564) = r9 - F          ;% g
dxdt(565:705) = -(r7 - r8)      ;% Cat

dxdt = dxdt';

end
