# Supplementary material for: Causality Analysis and Cell Network Modeling of Spatial Calcium Signaling Patterns in Liver Lobules
Source: Front Physiol. 2018 Oct 4;9:1377. doi: 10.3389/fphys.2018.01377 (PMC6180170; doi:10.3389/fphys.2018.01377)
Supplement: Supplementary file 1 [file Data_Sheet_1.ZIP › Vadigepalli-Supplementary-Data-Code/Cadata-1300cells-processed.txt]

Cell 1	Cell 2	Cell 3	Cell 4	Cell 5	Cell 6	Cell 7	Cell 8	Cell 9	Cell 10	Cell 11	Cell 12	Cell 13	Cell 14	Cell 15	Cell 16	Cell 17	Cell 18	Cell 19	Cell 20	Cell 21	Cell 22	Cell 23	Cell 24	Cell 25	Cell 26	Cell 27	Cell 28	Cell 29	Cell 30	Cell 31	Cell 32	Cell 33	Cell 34	Cell 35	Cell 36	Cell 37	Cell 38	Cell 39	Cell 40	Cell 41	Cell 42	Cell 43	Cell 44	Cell 45	Cell 46	Cell 47	Cell 48	Cell 49	Cell 50
0.529743891	0.455851008	0.29152375	0.426809124	0.420287822	0.347556835	0.459843957	0.409672593	0.295614408	0.496116444	0.370881501	0.373385838	0.350302371	0.39417201	0.340981384	0.350822146	0.33310741	0.425573153	0.26715681	0.380560342	0.513484613	0.407816516	0.490995752	0.29497852	0.178533794	0.408588612	0.321814035	0.290123787	0.371122383	0.311086219	0.388020965	0.458300549	0.486079811	0.218132844	0.494237827	0.545485972	0.396726883	0.436729211	0.506529886	0.348723143	0.315590672	0.473447823	0.317053735	0.34548705	0.36557328	0.379276568	0.396167863	0.476388262	0.310872665	0.303038679
0.603435066	0.581055692	0.567406314	0.540752315	0.506628892	0.526565738	0.608856333	0.521585554	0.606849997	0.572874022	0.484917025	0.428294688	0.401152945	0.42719713	0.399620237	0.449394183	0.417720934	0.535419916	0.640892334	0.477505294	0.580385705	0.732083872	0.592744003	0.644091301	0.5969367	0.445113395	0.437207855	0.405222624	0.52241518	0.493338277	0.685498694	0.759641168	0.707942353	0.592739967	0.78040068	0.743729811	0.580401475	0.534392676	0.698548916	0.444138501	0.501451745	0.651510915	0.530080802	0.496660408	0.536705295	0.537513958	0.467511105	0.653290878	0.357155162	0.428727697
0.631035037	0.626525668	0.669172295	0.572899094	0.547808211	0.61359911	0.680976413	0.569562511	0.726206084	0.592938801	0.541103672	0.453006682	0.424146962	0.434802864	0.421104159	0.482151217	0.443649186	0.592680018	0.787350733	0.517311264	0.595705706	0.87560644	0.622816469	0.794756701	0.775809324	0.442145266	0.505284149	0.455208667	0.59505292	0.588593061	0.806680221	0.887529442	0.799682322	0.747758484	0.900259298	0.824196111	0.684571359	0.57985695	0.78765909	0.488423805	0.592943868	0.7414234	0.63240337	0.554578453	0.597160753	0.597151808	0.480999993	0.733860899	0.354745312	0.489404456
0.609364607	0.609844228	0.637441079	0.546006564	0.54076388	0.607834562	0.669985835	0.553033359	0.68430678	0.560547875	0.531934707	0.45412689	0.415980234	0.415640011	0.399003956	0.452235375	0.406974276	0.585753813	0.751487939	0.50962093	0.552918039	0.852797104	0.576844206	0.759006438	0.750920654	0.405891596	0.506943541	0.441743467	0.581535296	0.58542229	0.778387024	0.869996932	0.77403194	0.715402788	0.885285533	0.792307298	0.695537305	0.562166932	0.7577437	0.478185275	0.583388223	0.735244768	0.619597068	0.536504232	0.580929798	0.571335981	0.449251901	0.731283228	0.315489198	0.479735304
0.557680272	0.557140017	0.520437403	0.493178363	0.499803996	0.528867046	0.599653552	0.496722868	0.541527671	0.502284854	0.475950599	0.435585706	0.385123023	0.381971919	0.347883761	0.388099527	0.331572618	0.528669688	0.592529923	0.467012327	0.472609304	0.70915768	0.485982099	0.597247411	0.576639007	0.356926884	0.453096556	0.386977709	0.507930711	0.503974716	0.647762098	0.743600873	0.672690663	0.552189987	0.769698314	0.694661439	0.624659689	0.498654903	0.645018403	0.430644857	0.49719582	0.6531582	0.521246076	0.469613606	0.51598762	0.494664548	0.404712713	0.67319737	0.262173556	0.421419259
0.507337878	0.499962787	0.386731321	0.448803791	0.451185512	0.425333458	0.515025932	0.438520677	0.387464469	0.452252111	0.410467749	0.407471371	0.348642986	0.352532734	0.295241186	0.328105355	0.257639924	0.454259758	0.404648521	0.41561553	0.393420582	0.53350043	0.39920364	0.412347651	0.355277315	0.32001141	0.378915469	0.326354817	0.422707277	0.396161118	0.49451588	0.582353695	0.558827235	0.356483491	0.620507295	0.596038876	0.515650153	0.425331192	0.517695614	0.375533961	0.389350804	0.547781589	0.399872685	0.394527867	0.440718841	0.417654087	0.378307653	0.600790729	0.218184992	0.351342011
0.472901518	0.45817789	0.281722567	0.432131635	0.414741676	0.339409178	0.450306332	0.399288659	0.271357175	0.423794398	0.362543067	0.380449859	0.319830461	0.334847401	0.259767921	0.292605182	0.207538332	0.396938434	0.255052941	0.372171334	0.33818091	0.393967426	0.343608381	0.277044897	0.17228354	0.30073888	0.320026377	0.283186125	0.361441775	0.308701102	0.373856858	0.446194886	0.47344999	0.198588968	0.498113605	0.535086425	0.41563871	0.37124513	0.42676527	0.335438872	0.305631956	0.463203316	0.307754222	0.342893484	0.384492953	0.375573193	0.384957256	0.548262889	0.192667963	0.300396968
0.467586388	0.448497659	0.270732783	0.450472787	0.405474659	0.318466935	0.429341889	0.39320405	0.272872367	0.429674289	0.357673301	0.371970532	0.307722309	0.338472273	0.254747107	0.296121801	0.198664974	0.370989578	0.234633154	0.373486894	0.326284616	0.377890194	0.343526625	0.273742255	0.152678835	0.306343089	0.295757888	0.276397727	0.354433093	0.288019388	0.354998657	0.429005049	0.45293534	0.185167954	0.487907579	0.53833683	0.369118965	0.351163824	0.397990035	0.330364238	0.298740356	0.4558623	0.300851101	0.348666936	0.389295056	0.395278722	0.420626284	0.544800411	0.188003069	0.288239301
0.491385571	0.451558779	0.301321264	0.476999831	0.421828314	0.34592035	0.44647522	0.410295346	0.335564691	0.45407859	0.383457837	0.370750893	0.316973393	0.355017453	0.273536858	0.322668643	0.227942556	0.376396095	0.272301248	0.39528125	0.357790259	0.425942012	0.381221225	0.343393811	0.222702914	0.325777756	0.309135468	0.294758164	0.386651963	0.319849681	0.38933316	0.472237624	0.476142519	0.249666799	0.5259164	0.576959551	0.373618598	0.36132338	0.425884891	0.355481093	0.344794892	0.497003934	0.350695012	0.383287419	0.410585636	0.43937681	0.459835736	0.565960461	0.197647635	0.309382071
0.521179872	0.455904031	0.337956672	0.492594337	0.446836728	0.388272318	0.480788581	0.429579403	0.404159615	0.473281862	0.413192276	0.373370347	0.339390297	0.369682397	0.295006909	0.346554298	0.263911024	0.398748724	0.318787673	0.418861076	0.399503566	0.484401294	0.420311609	0.418960588	0.325935523	0.339557033	0.338648568	0.316230617	0.423414282	0.366918853	0.430788244	0.531119761	0.515141944	0.333103844	0.573736273	0.611433347	0.413442246	0.383868281	0.473030503	0.392296122	0.407136152	0.551185744	0.417553268	0.422976405	0.4289432	0.472225442	0.477278963	0.591532475	0.209490363	0.343518716
0.534171646	0.455185188	0.35017124	0.489177308	0.462678359	0.408512394	0.500964183	0.431101399	0.429080977	0.471150302	0.422062479	0.375811918	0.358847092	0.371094837	0.300427427	0.348754092	0.276313466	0.416200705	0.332798198	0.426407422	0.41663201	0.504693709	0.429886578	0.441155778	0.399462075	0.335447309	0.355486358	0.321928477	0.432791252	0.388404216	0.440302686	0.559583552	0.53620244	0.376362297	0.594031854	0.613483449	0.450280235	0.398398647	0.494972423	0.42098954	0.447120853	0.58262058	0.461897079	0.446421447	0.43084772	0.469462843	0.466844574	0.604294566	0.212311922	0.369150959
0.53246556	0.457440452	0.338833923	0.474338911	0.466934831	0.398724734	0.499288135	0.421503891	0.416936086	0.458482194	0.410861171	0.377680516	0.367263618	0.364679945	0.291388486	0.335735623	0.266907126	0.41521603	0.316179588	0.420136792	0.407445607	0.485900002	0.415383214	0.411560887	0.421500539	0.326099553	0.349719593	0.313882582	0.415915783	0.375426581	0.422850957	0.549760368	0.535336882	0.373052268	0.576449249	0.592226431	0.461188326	0.398737841	0.485581628	0.437945075	0.45735069	0.587290785	0.47765399	0.449611686	0.417084088	0.437373789	0.442809064	0.600044274	0.208380224	0.378742012
0.518401467	0.470054453	0.312562942	0.465678678	0.464272831	0.369742964	0.483207785	0.411461086	0.366976145	0.436826508	0.384258472	0.383761083	0.363209223	0.35129298	0.27264195	0.311469958	0.243482597	0.403412768	0.284929388	0.400812202	0.379910112	0.440477029	0.380614571	0.3421876	0.38631787	0.317938542	0.33137871	0.298510108	0.378931733	0.336090786	0.394808128	0.509131815	0.519177233	0.324698602	0.533485335	0.556179796	0.446758011	0.392215276	0.460009312	0.442462361	0.439560105	0.567778015	0.469765142	0.439908637	0.401085097	0.399245324	0.426271274	0.587849935	0.202245974	0.373067284
0.497633615	0.49575524	0.290964996	0.478708976	0.463217323	0.342825464	0.466905608	0.414975849	0.309947529	0.420639895	0.366185248	0.399564124	0.348281676	0.339261765	0.255552187	0.291706292	0.215243321	0.390818498	0.25626007	0.383039993	0.344110788	0.395660749	0.34701153	0.276265482	0.331545798	0.322514327	0.317265969	0.286479871	0.355799835	0.293933709	0.372527424	0.461989442	0.496497941	0.271971231	0.489625299	0.528952205	0.418270039	0.391272992	0.433232541	0.448094323	0.423156219	0.551373974	0.467203211	0.435069422	0.399152255	0.387814327	0.437862435	0.58156062	0.200928044	0.365211685
0.485753302	0.529231659	0.292082505	0.515782301	0.474224389	0.348191937	0.464159003	0.439222975	0.285819996	0.427145591	0.374925331	0.426478541	0.330722463	0.335065181	0.25789617	0.288423157	0.201661358	0.389554893	0.250620967	0.379948955	0.326128089	0.377848301	0.334173091	0.251792668	0.298822581	0.345438586	0.32426854	0.289228323	0.374945191	0.293556549	0.382558825	0.435733879	0.476789585	0.256540887	0.466980573	0.525131948	0.38846896	0.403843116	0.427301824	0.465095249	0.433136589	0.558776265	0.489760518	0.447417971	0.419109342	0.419035562	0.479104549	0.58879362	0.210736082	0.366830597
0.489023979	0.558231833	0.317210257	0.562797868	0.496329376	0.392420207	0.482655682	0.478465293	0.305408821	0.451644879	0.410076338	0.459104368	0.319877293	0.338712368	0.278968649	0.303576782	0.215944588	0.403910715	0.270405301	0.393041456	0.346729305	0.393855626	0.351481452	0.289352642	0.309430378	0.378042467	0.355068652	0.304133752	0.433434371	0.340706809	0.418427298	0.449414772	0.468741659	0.292432332	0.472210504	0.541236397	0.376802485	0.427243498	0.448184198	0.490985692	0.471867294	0.589102966	0.531813337	0.474696045	0.45444371	0.480349728	0.530121112	0.60475189	0.232908016	0.379599232
0.501917546	0.566287285	0.351881859	0.595939938	0.516717001	0.454475178	0.512377453	0.51326772	0.352199962	0.477520293	0.45229471	0.485639467	0.320868357	0.344418914	0.30371285	0.322212271	0.243674898	0.424751064	0.293820555	0.412142458	0.389423706	0.427623888	0.38127798	0.352349441	0.355373722	0.402277487	0.393062914	0.318616404	0.500322587	0.408393196	0.453629596	0.485310107	0.471814693	0.360253395	0.497081162	0.55936927	0.39449299	0.451125998	0.478033843	0.510314414	0.516550297	0.620728305	0.564887282	0.500758494	0.487387849	0.537500321	0.56114464	0.614848735	0.259997853	0.394108429
0.512411703	0.548315982	0.376682102	0.594951251	0.519169286	0.500127959	0.533065097	0.522826155	0.395323011	0.490034694	0.477560013	0.493006392	0.32942641	0.345377816	0.315918981	0.329982306	0.26151176	0.437473001	0.300670962	0.422824585	0.422533045	0.44862764	0.398113896	0.392694044	0.408520301	0.402402762	0.415459752	0.321053501	0.540659083	0.455971998	0.465532221	0.513372577	0.483598719	0.421956601	0.521045713	0.563923106	0.427015161	0.460753328	0.492613212	0.504524332	0.533997677	0.626871399	0.557400764	0.505659035	0.499009245	0.555802178	0.550856172	0.60444752	0.279211255	0.396742975
0.511296166	0.511779213	0.379052383	0.555613194	0.496150877	0.50115934	0.528856549	0.49919458	0.414062655	0.484506682	0.467781086	0.474646092	0.335884765	0.340372898	0.309855799	0.323897045	0.258980747	0.434313123	0.289570539	0.416919713	0.427319216	0.446510307	0.39259961	0.391243693	0.439678686	0.376101888	0.405648915	0.309307741	0.528083374	0.460276318	0.448797269	0.517952181	0.503285943	0.445289568	0.532053242	0.552343293	0.453448792	0.448010675	0.484567586	0.465930318	0.503304264	0.59516855	0.498399574	0.478870353	0.480360546	0.522486333	0.500280119	0.569544778	0.279408601	0.37995346
0.499412587	0.471770395	0.361005079	0.494275103	0.456494336	0.455004491	0.500681414	0.454366629	0.397309781	0.4609106	0.428398097	0.43619902	0.334494692	0.332827543	0.286487042	0.308852169	0.240966561	0.415601886	0.268555701	0.397752532	0.404248178	0.428784045	0.370573392	0.357628478	0.434986202	0.336608739	0.368905041	0.287767085	0.467844162	0.41113672	0.411073182	0.50392286	0.528237308	0.422352207	0.531302766	0.533533787	0.463943213	0.418284494	0.456935202	0.406489705	0.431940896	0.538043732	0.409191778	0.427458101	0.438264866	0.455922309	0.433615655	0.521589215	0.258261016	0.349101538
0.488154205	0.441970073	0.33634893	0.433856859	0.422980207	0.387382219	0.461137171	0.407414898	0.359379265	0.432543533	0.378605842	0.392517887	0.325902686	0.329141856	0.257899801	0.291096709	0.212347738	0.389449711	0.248584299	0.374452073	0.359153501	0.406942081	0.339966267	0.303221129	0.400531523	0.300715984	0.32361854	0.270740522	0.391812307	0.33798992	0.384150576	0.481930168	0.556197159	0.371656945	0.528957837	0.521374351	0.458318245	0.38479693	0.42544309	0.35470177	0.349335351	0.479456104	0.323204124	0.371433488	0.39124376	0.38855416	0.376818776	0.476160008	0.225437703	0.321083679
0.492756016	0.434543929	0.321205337	0.403465418	0.420287822	0.33645944	0.441349025	0.384813076	0.324115506	0.42200088	0.353290018	0.358628702	0.314013226	0.341956191	0.24023761	0.282450386	0.200812431	0.371425001	0.256231399	0.35959446	0.319619882	0.396840523	0.333526436	0.271905202	0.354555137	0.293748199	0.298871535	0.281711206	0.336915127	0.287476607	0.391584989	0.479028965	0.583779131	0.324006002	0.531906596	0.537674437	0.439639133	0.361760978	0.413063277	0.341210554	0.301087072	0.455488736	0.283339983	0.329813403	0.355759978	0.365045124	0.359359909	0.453979677	0.19426356	0.315008354
0.522364184	0.4577957	0.323916961	0.425257767	0.460028479	0.339871758	0.465578612	0.407622212	0.309669239	0.440592494	0.376250088	0.358222658	0.311953425	0.368243886	0.255125624	0.294794407	0.226293023	0.382480596	0.291465742	0.372140933	0.324716124	0.411198107	0.371525149	0.294676986	0.314158988	0.323053617	0.3192771	0.320410318	0.349301598	0.303914746	0.434808835	0.510153606	0.602796771	0.302318214	0.542275178	0.577919065	0.423743551	0.35774854	0.438880962	0.381039166	0.318935613	0.481994443	0.31673676	0.329032299	0.35036561	0.398627274	0.38868817	0.473348991	0.188063161	0.340251395
0.572929107	0.498334699	0.340557527	0.488919978	0.531904885	0.399440767	0.532190786	0.464611338	0.318569365	0.481915813	0.44220846	0.392520528	0.330703766	0.398654807	0.296401684	0.32200206	0.281790452	0.422439593	0.338461276	0.407332547	0.381955416	0.44469977	0.443884832	0.361115438	0.285723809	0.373491186	0.375643502	0.370223911	0.418794951	0.383879108	0.492378537	0.568272608	0.606056121	0.308407217	0.556309923	0.624251614	0.421286261	0.376008633	0.487375342	0.463109706	0.397898412	0.544227842	0.4012585	0.367402883	0.375980524	0.470351021	0.443696599	0.525580922	0.214726085	0.389156359
0.627415396	0.539053122	0.358374696	0.563733624	0.606854267	0.485436696	0.616155239	0.526143294	0.338433631	0.527020832	0.522007445	0.444445471	0.364909462	0.422524386	0.343473197	0.350260968	0.342784132	0.471790479	0.38091257	0.448888337	0.461957367	0.483567219	0.522990425	0.43587557	0.26447713	0.419431878	0.437439524	0.411274941	0.502500909	0.487445505	0.535745361	0.628424743	0.597519337	0.324402654	0.564390525	0.658345003	0.432410916	0.402597102	0.53173445	0.553856883	0.500972746	0.607876305	0.488047777	0.424115639	0.415997286	0.540222227	0.491531739	0.586826451	0.26588136	0.439224299
0.663592833	0.568778841	0.364512726	0.620311027	0.651121343	0.555156812	0.687643345	0.567362402	0.351714969	0.559423559	0.583839217	0.489983437	0.400743436	0.433129169	0.379703553	0.370118252	0.387841013	0.512913172	0.411430298	0.482472179	0.529207046	0.520435616	0.583254714	0.489435342	0.24196283	0.443855511	0.476895883	0.427846655	0.557116864	0.567772075	0.542905032	0.662463372	0.58656703	0.326829508	0.560328935	0.673129428	0.448307695	0.42227754	0.554426625	0.613524171	0.583242511	0.645639993	0.539258116	0.473027941	0.448909988	0.57741896	0.513927236	0.635995179	0.319271827	0.464198223
0.665254119	0.579655927	0.354306651	0.634012335	0.643706791	0.576762999	0.713509577	0.570454385	0.347558816	0.562684133	0.596985609	0.512949751	0.423593114	0.423464048	0.397013693	0.379035426	0.398741356	0.536457841	0.420957311	0.499093407	0.561486176	0.55029367	0.59906023	0.504941554	0.215092936	0.432424138	0.475495704	0.406565696	0.56372863	0.592260691	0.515790837	0.655088358	0.58444633	0.303534052	0.547758979	0.664373424	0.457728398	0.428689878	0.550594189	0.616168454	0.605344305	0.636927282	0.531971133	0.499259199	0.463583937	0.559969196	0.49957435	0.655112674	0.354135498	0.448168031
0.630672888	0.565604269	0.334000859	0.594803352	0.587482328	0.536846125	0.68130054	0.531051822	0.328200712	0.536038188	0.554328528	0.497184291	0.420810117	0.403433972	0.386505319	0.373819571	0.375448924	0.535577394	0.419777732	0.487746188	0.543419067	0.573540341	0.569869744	0.485047018	0.190067875	0.391936997	0.43088575	0.361129447	0.511545553	0.55193974	0.476250921	0.61168522	0.598340534	0.262370764	0.538827322	0.652695522	0.453950198	0.424681113	0.522898382	0.562180861	0.557190227	0.588155015	0.468225084	0.4866185	0.45172949	0.502785835	0.457216469	0.632870911	0.3492901	0.40069408
0.574957887	0.537719894	0.316382959	0.524993827	0.510110681	0.459415751	0.608609222	0.473883919	0.306366834	0.493739212	0.478948016	0.452647863	0.391722421	0.385275278	0.361758742	0.361728044	0.341153015	0.521340047	0.41777546	0.458702726	0.491958253	0.592422447	0.522260564	0.457078605	0.178533794	0.345102071	0.370743765	0.31453496	0.439825805	0.482887976	0.451244638	0.554095911	0.626555919	0.226270386	0.546043314	0.659691293	0.438141353	0.413233862	0.496407964	0.476616847	0.465265392	0.527314291	0.387325824	0.44527133	0.421345284	0.439782724	0.411406936	0.582938666	0.307486552	0.34114571
0.52099127	0.509339344	0.312233507	0.457135275	0.441254235	0.382969533	0.529004932	0.429791646	0.29604047	0.454847324	0.405769825	0.403434656	0.353548525	0.376334725	0.339773459	0.350580476	0.322108103	0.512439287	0.416602146	0.426946802	0.443686895	0.603385553	0.488394162	0.44524482	0.188886244	0.310613016	0.32232473	0.283474036	0.39430534	0.432582907	0.455765042	0.507801919	0.658154807	0.218132844	0.572987087	0.69242016	0.41781677	0.404129251	0.49090401	0.396075431	0.373270278	0.480349306	0.327390294	0.396340697	0.390939104	0.403108563	0.380242017	0.527890757	0.249930219	0.291025836
0.484228959	0.490284928	0.323027788	0.421214387	0.405179866	0.335428818	0.470926704	0.419050803	0.302979498	0.430961231	0.361298305	0.373385838	0.327293873	0.37552607	0.329786222	0.342771541	0.331832288	0.518490209	0.409667492	0.404286705	0.425048353	0.598514589	0.487686843	0.454931092	0.218928986	0.298018897	0.310051154	0.274936794	0.399392295	0.430589677	0.484210003	0.488545174	0.677838892	0.245352161	0.610373135	0.738557458	0.402070391	0.403647624	0.509778841	0.343303335	0.311924978	0.460467299	0.311268635	0.358767396	0.376218888	0.405305216	0.370602389	0.485963164	0.199467886	0.267678461
0.474613058	0.483737876	0.339532279	0.428198309	0.413210137	0.333751631	0.452794734	0.441343403	0.321150425	0.425942974	0.361891277	0.373527145	0.32565441	0.375628068	0.329399646	0.335942763	0.363456559	0.53451289	0.389534339	0.394546443	0.437644455	0.572573273	0.516406186	0.471120346	0.255145691	0.307654077	0.331510219	0.283739418	0.444664337	0.471460524	0.515076493	0.495783439	0.673634397	0.293859248	0.640356103	0.773758263	0.396726883	0.409313283	0.540275808	0.324870889	0.296519084	0.464690421	0.329937905	0.340652107	0.381738037	0.434615248	0.378578029	0.465166954	0.174881211	0.27629635
0.487200546	0.486640593	0.347336138	0.464454686	0.450212865	0.363034183	0.467336443	0.477673267	0.337150813	0.435232486	0.393645093	0.397182409	0.345714141	0.369681635	0.328616091	0.327009664	0.394558233	0.545195495	0.356667883	0.393903649	0.460238022	0.529827319	0.550965536	0.470835781	0.27945163	0.32507061	0.365238864	0.297444193	0.493677595	0.520040347	0.525226109	0.51558986	0.64311523	0.335523746	0.64652276	0.776308113	0.401937947	0.413386251	0.563754924	0.331442706	0.318808736	0.478821507	0.35577457	0.34009681	0.399298977	0.464982455	0.390534828	0.464891417	0.190652741	0.308822103
0.505575738	0.492811915	0.339849929	0.502271131	0.487229465	0.393075366	0.492365918	0.502628383	0.339457494	0.446679022	0.428462652	0.425436649	0.371193321	0.356985141	0.318476602	0.316029265	0.401199925	0.535846045	0.322420318	0.395246396	0.465441205	0.484596987	0.562677498	0.440372699	0.279396384	0.334483847	0.38589678	0.303336398	0.508980631	0.535273252	0.504296013	0.530013763	0.594719996	0.344462173	0.62338023	0.739844646	0.412889215	0.409491698	0.568294456	0.345712025	0.349612004	0.486039858	0.363228409	0.34817436	0.413878717	0.473366749	0.394536754	0.480186003	0.230801642	0.342977989
0.514152587	0.496863009	0.318475482	0.518428537	0.505848526	0.401133934	0.505324248	0.499605718	0.326364927	0.450845596	0.442595193	0.439486362	0.383155342	0.341713243	0.29829914	0.306883564	0.372533272	0.50279586	0.303327698	0.393340872	0.439746793	0.454068374	0.535194342	0.385590212	0.255498678	0.332302721	0.385062388	0.299978296	0.477131449	0.497207371	0.460449612	0.52687197	0.543611379	0.316629454	0.57958525	0.676658357	0.42256691	0.397633977	0.555124994	0.351958864	0.362451292	0.482563988	0.348791771	0.353618595	0.413506724	0.453318163	0.390635846	0.497946988	0.268113488	0.364288176
0.510569927	0.496894237	0.292237807	0.50379988	0.499451284	0.388261026	0.499799128	0.470185915	0.307025341	0.448274523	0.431801409	0.432282123	0.372592389	0.334785307	0.275079798	0.304379939	0.317344612	0.456607573	0.310215675	0.387697524	0.393681758	0.447854757	0.474531448	0.328811772	0.221080832	0.323496476	0.362245203	0.291744048	0.417570178	0.420230679	0.414674601	0.508577049	0.504606818	0.267720479	0.53316797	0.610343955	0.424891751	0.384334313	0.535319986	0.349687498	0.354579624	0.475542135	0.320398765	0.352094695	0.397158772	0.417132038	0.384215239	0.510522738	0.28529866	0.36808259
0.497202137	0.494763236	0.279540157	0.469662598	0.470881079	0.360925824	0.479111342	0.431225862	0.29546425	0.443207989	0.401358426	0.412316671	0.346771043	0.343821627	0.258004538	0.310131778	0.259057289	0.416232253	0.339673885	0.380840191	0.347349988	0.461637417	0.406069687	0.29497852	0.194518044	0.311736176	0.332605711	0.284703647	0.359615834	0.340101999	0.388020965	0.483871856	0.486079811	0.220859209	0.501854827	0.563085758	0.420623942	0.378154546	0.52014935	0.344090506	0.334048506	0.47417408	0.304793387	0.346606196	0.373982153	0.382700346	0.378743337	0.516226498	0.277934098	0.359221563
0.481368001	0.494026056	0.293314065	0.441345898	0.437407084	0.336813523	0.460097795	0.40457241	0.300834346	0.439945713	0.369664957	0.397272813	0.324878358	0.365152434	0.258866156	0.320503569	0.218554916	0.398047484	0.374253215	0.376271572	0.329824778	0.479708521	0.353220529	0.296475157	0.188416136	0.304593381	0.311794268	0.282287975	0.342575945	0.302332489	0.389962225	0.461890984	0.487722659	0.202596386	0.494237827	0.545485972	0.411042545	0.383945187	0.512655346	0.339868526	0.311105786	0.481664628	0.320629003	0.341404648	0.361974939	0.365863507	0.377420693	0.515013238	0.24631622	0.340259735
0.477659444	0.49686998	0.328856464	0.440633806	0.412862049	0.336116503	0.458876409	0.406932214	0.320637262	0.442388574	0.361351541	0.401608258	0.325299979	0.386473021	0.276033533	0.328396689	0.213174221	0.406762938	0.392021687	0.376037059	0.355891936	0.485087984	0.341790536	0.326310838	0.202119398	0.305398109	0.308009628	0.289148641	0.380089809	0.323749328	0.414479518	0.44980641	0.50256426	0.222062493	0.506558788	0.55428537	0.399121957	0.399772229	0.50661395	0.337582408	0.301905337	0.494398365	0.362389243	0.342565825	0.371993855	0.375894885	0.379461592	0.505446346	0.210049246	0.325756159
0.49171722	0.501908476	0.370179599	0.471503339	0.404165077	0.358494731	0.479147969	0.43464591	0.341405369	0.448742521	0.380639093	0.426082281	0.352538094	0.396517325	0.297428232	0.327859789	0.238579707	0.433671878	0.379757381	0.381138628	0.407972319	0.470489368	0.370278429	0.363400619	0.222038872	0.31337123	0.322425557	0.3014179	0.446005542	0.386672282	0.445107835	0.450116379	0.521358849	0.261804571	0.526227382	0.577755876	0.3895551	0.418401619	0.493318547	0.335734467	0.314846385	0.503126218	0.405832814	0.351030064	0.401596249	0.402220202	0.381088344	0.492609166	0.192877333	0.322385978
0.518356511	0.50428594	0.39895807	0.516626081	0.415959635	0.385258279	0.510521568	0.468421682	0.34713066	0.453279014	0.413758427	0.456189044	0.392554062	0.38776123	0.310036578	0.318436438	0.277048103	0.462833348	0.34138311	0.387479111	0.452757884	0.442678257	0.417240661	0.385830474	0.230533655	0.321148102	0.340629058	0.314936757	0.497067631	0.449866786	0.4648135	0.456039228	0.536715074	0.293157272	0.53933702	0.603898188	0.388735585	0.432046462	0.47074888	0.340068114	0.340459958	0.500130024	0.428088258	0.362663951	0.435035788	0.427586953	0.380947936	0.481509899	0.203535643	0.327157349
0.545562737	0.498283243	0.398463896	0.547332522	0.439223338	0.396582284	0.535472402	0.486344365	0.335966135	0.451120072	0.437883825	0.470960659	0.420379761	0.364429074	0.308559421	0.304553409	0.308489378	0.480792088	0.29609595	0.391719919	0.469660475	0.417293277	0.454856553	0.383365921	0.22362096	0.325251663	0.351359944	0.329022961	0.510036165	0.477956122	0.464474684	0.461821403	0.545227675	0.298041348	0.537658296	0.625785802	0.396298784	0.437038224	0.447846912	0.358864905	0.364512177	0.486595386	0.414539239	0.37212584	0.45374595	0.441766832	0.383021483	0.476388262	0.234943981	0.331799183
0.563913388	0.486052342	0.368088661	0.54169735	0.464207031	0.387358659	0.541429761	0.477447452	0.309704436	0.442646822	0.440594211	0.456968142	0.416043843	0.343110141	0.291899725	0.297573219	0.325487445	0.483574851	0.26715681	0.392469816	0.450678118	0.407816516	0.47194202	0.361733392	0.200254033	0.327066916	0.35389765	0.346323472	0.476423825	0.451879975	0.445679684	0.464822086	0.547434882	0.276497411	0.525058437	0.641500515	0.410470061	0.43547328	0.440097219	0.404683678	0.382705199	0.473447823	0.372953794	0.376746176	0.443668328	0.44152671	0.390804934	0.48012317	0.269608228	0.329644601
0.5635434	0.468220071	0.324226407	0.500135153	0.488736684	0.363355408	0.528468075	0.446645852	0.28279559	0.43433007	0.417015304	0.420426052	0.382079348	0.342040911	0.272316811	0.305374015	0.325779289	0.476955902	0.268212199	0.390505751	0.40917523	0.416410333	0.462285135	0.337011343	0.171187675	0.330805348	0.354769153	0.366174489	0.417471971	0.389907492	0.420280729	0.463897586	0.546470551	0.23605989	0.507906297	0.650474258	0.426771015	0.433243831	0.458945699	0.486936049	0.397560186	0.474586517	0.331198557	0.374925058	0.409855208	0.425578898	0.404782437	0.493534626	0.292716621	0.320259186
0.546031036	0.451061955	0.291642035	0.448678886	0.514457871	0.347556835	0.5119178	0.419128493	0.280156667	0.435103856	0.385157446	0.381920258	0.338087879	0.370475012	0.266320189	0.329653907	0.320990186	0.470636252	0.295505081	0.386603267	0.37936029	0.432931657	0.442462822	0.324691062	0.158493403	0.337891496	0.357779894	0.390463154	0.375474785	0.331106519	0.397426591	0.459391248	0.546312705	0.196543853	0.493569515	0.650430525	0.439441549	0.436375027	0.502322766	0.601633929	0.414398826	0.496981352	0.317053735	0.372224531	0.374333892	0.403339419	0.420510267	0.5149766	0.293436877	0.309094868
0.522700987	0.445876473	0.290383157	0.426809124	0.537276138	0.365050554	0.514219869	0.424847244	0.313906961	0.450391951	0.370881501	0.369993921	0.318906868	0.42265101	0.28505524	0.364969083	0.323763716	0.470836426	0.330525392	0.385409237	0.388786441	0.442599295	0.434973176	0.330636156	0.177066638	0.349572299	0.37019366	0.417848824	0.380775595	0.311086219	0.384295453	0.453703987	0.549984798	0.187430459	0.487401172	0.637965906	0.443677831	0.448448056	0.553286935	0.722774387	0.442766224	0.534642493	0.341131739	0.376539317	0.36557328	0.384951936	0.429887561	0.5408466	0.276328011	0.303038679
0.509021885	0.461331306	0.323949772	0.46566464	0.558497004	0.424523129	0.552580958	0.481480081	0.373330031	0.477641033	0.392293775	0.402919133	0.351996453	0.480133322	0.328621474	0.403125565	0.339341646	0.476381316	0.351118888	0.391786577	0.441467362	0.438188681	0.453043727	0.349020458	0.219065713	0.362884243	0.392053889	0.445398222	0.4332429	0.34062881	0.383851161	0.450881125	0.557776313	0.221187787	0.490630301	0.612293778	0.441530146	0.470584714	0.588604773	0.815743568	0.483438564	0.571203744	0.391085248	0.394787963	0.403234611	0.379276568	0.426546592	0.567190876	0.255386909	0.305422651
0.518326329	0.494183355	0.376961379	0.568531066	0.576785341	0.510658532	0.628591963	0.582389917	0.444264529	0.50653679	0.448216849	0.476849213	0.440304917	0.521365467	0.386110268	0.432492588	0.362348392	0.480505009	0.344038525	0.409730817	0.515051709	0.422747816	0.492067812	0.367328372	0.271665791	0.37337507	0.418101004	0.472174921	0.502700231	0.399969078	0.39463494	0.454595186	0.565920843	0.277464636	0.497040121	0.581568404	0.442205715	0.503125809	0.592370412	0.848394763	0.526469596	0.590185072	0.44087345	0.430530151	0.486859003	0.39388133	0.414696948	0.591754938	0.24693246	0.314145126
0.556317593	0.540271038	0.424783349	0.704975753	0.587281143	0.590243258	0.725296362	0.696450859	0.508393629	0.524302299	0.517964045	0.56430255	0.555094547	0.532981778	0.440793476	0.446585162	0.38013383	0.476481691	0.318426766	0.441374044	0.573398891	0.407345352	0.531884287	0.374220059	0.31614531	0.379415944	0.443827423	0.501597695	0.547685526	0.451656006	0.409539958	0.465454924	0.566770791	0.335068367	0.502514343	0.553646699	0.457771315	0.546645536	0.566067421	0.806848088	0.556945536	0.586633366	0.469068441	0.483308523	0.595226884	0.434682046	0.409019581	0.615275215	0.262902212	0.324117379
0.618243909	0.589908023	0.448631561	0.822881648	0.584071896	0.629104422	0.813240463	0.780643531	0.547876785	0.523265475	0.573000458	0.631922346	0.656788249	0.516418518	0.47734854	0.443449084	0.380198051	0.462693737	0.285651183	0.485979576	0.586758561	0.40373661	0.548450712	0.365123471	0.332785855	0.384985185	0.47077457	0.53996798	0.540834374	0.463727885	0.424112015	0.480332102	0.55672885	0.374474083	0.5041546	0.539671005	0.495902258	0.600541604	0.528357906	0.703557896	0.564740742	0.572384398	0.474200818	0.549308909	0.697035521	0.503508614	0.42867988	0.641037943	0.307433964	0.332065978
0.689642998	0.630249278	0.446594661	0.872782399	0.563738355	0.610682238	0.862544383	0.799722112	0.563466182	0.506236938	0.593850233	0.653696571	0.707662791	0.486251002	0.48751895	0.424725315	0.357257394	0.443507145	0.260203651	0.539201286	0.547727032	0.413856983	0.528031644	0.344467707	0.316936218	0.398735358	0.506754726	0.591312553	0.485571122	0.429107329	0.432123984	0.493623093	0.537173598	0.379121515	0.500582671	0.544451988	0.553567466	0.65974745	0.504235445	0.572494172	0.551806639	0.570767414	0.476818631	0.622299815	0.766837065	0.59448424	0.48647451	0.672698213	0.376945935	0.340007789
0.750529024	0.652634161	0.435319054	0.831879848	0.528144065	0.545884645	0.855295993	0.74342994	0.568721321	0.486257962	0.582160003	0.626352217	0.694082676	0.461640175	0.472091787	0.394313726	0.316250951	0.425627164	0.253258062	0.5932258	0.474332271	0.426430712	0.47567266	0.321916397	0.28127011	0.429509588	0.560301425	0.651701784	0.414512343	0.369884477	0.429160095	0.498596853	0.508299522	0.351888745	0.49264656	0.562929636	0.615689269	0.712355091	0.509930825	0.453695087	0.53197761	0.603070637	0.506268323	0.694093887	0.79696121	0.692343029	0.579303121	0.711453732	0.462012732	0.354632887
0.781911226	0.654829289	0.439332745	0.715009085	0.48513996	0.468519424	0.792740408	0.632664388	0.579670728	0.480437623	0.560362092	0.570766508	0.632521355	0.456212813	0.439291827	0.357958875	0.270203765	0.413659332	0.264760694	0.638300352	0.399553526	0.432618097	0.413133336	0.302676068	0.248411833	0.480711317	0.632791657	0.707271753	0.371122383	0.324437702	0.41776387	0.49223583	0.477028665	0.314701617	0.483459239	0.579835565	0.660419949	0.741218636	0.54275969	0.375646892	0.522994188	0.674459249	0.579992482	0.754644111	0.798508624	0.77553527	0.686190886	0.754161729	0.549299106	0.382723071
0.772648085	0.639981628	0.47444145	0.578614311	0.446747472	0.418420709	0.694411895	0.511228819	0.603178054	0.501041074	0.558564818	0.520399646	0.559251874	0.472228063	0.401214716	0.323646127	0.234605883	0.408175669	0.279298425	0.665483132	0.354184378	0.425443991	0.367530354	0.289575387	0.237917743	0.546683666	0.713544851	0.738323109	0.385741229	0.325340127	0.400003471	0.478255839	0.460985	0.291140356	0.48097073	0.585871093	0.668916873	0.730349139	0.582146147	0.344999478	0.535418507	0.767866834	0.688237212	0.792620414	0.791133895	0.823995974	0.776042502	0.793515837	0.623197015	0.42559172
0.724115295	0.613498199	0.535310825	0.465414257	0.42528244	0.421045298	0.590021183	0.426761997	0.631322355	0.548649306	0.595951711	0.50332388	0.510015222	0.50180457	0.370069471	0.301387245	0.22133425	0.404674455	0.290589338	0.669609186	0.352761695	0.406541446	0.357140403	0.286029215	0.254898379	0.613157898	0.781570939	0.728102334	0.459562505	0.380861033	0.382248145	0.464057374	0.472520046	0.292932082	0.490624258	0.577685117	0.634599243	0.673415178	0.601231565	0.348418137	0.565208437	0.850028578	0.794231398	0.797300736	0.788223391	0.827825077	0.821524282	0.820248858	0.668083634	0.476371395
0.650467821	0.580058339	0.595378607	0.407993112	0.428622199	0.474203117	0.50784942	0.409672593	0.645392623	0.611083034	0.667516914	0.527759298	0.50142817	0.533395114	0.355152516	0.300965965	0.234711211	0.398824741	0.297209703	0.651044943	0.389236447	0.393392885	0.382198675	0.292821268	0.286814007	0.661660587	0.813610444	0.671598821	0.564604612	0.470140117	0.37562981	0.457378131	0.510535237	0.314128189	0.512018375	0.561331454	0.566736354	0.579930031	0.58209332	0.364006782	0.594622636	0.88684702	0.850799783	0.761781374	0.786932843	0.791653157	0.811562567	0.826233438	0.671989856	0.522193287
0.573717754	0.542451699	0.620107695	0.41013664	0.456315543	0.54877668	0.464490079	0.459877412	0.627154191	0.668557093	0.744176428	0.578661516	0.524274676	0.558605269	0.360610491	0.32767898	0.27073694	0.392390233	0.300464493	0.615209595	0.442759998	0.403379505	0.425466286	0.308002159	0.310472684	0.675845217	0.794289398	0.579145909	0.658175307	0.55391895	0.385301115	0.460733624	0.566378113	0.335929276	0.537885607	0.546387585	0.49192059	0.484593006	0.537174066	0.374451603	0.601166195	0.859855146	0.824512218	0.686379725	0.769527418	0.731582041	0.755478351	0.806994551	0.630954976	0.550086309
0.515131319	0.508635298	0.586449361	0.447466616	0.498301121	0.602938122	0.459843957	0.547415939	0.570542701	0.702152466	0.786701474	0.626470281	0.551407669	0.574808353	0.383915269	0.378041272	0.318986455	0.392872915	0.304312687	0.569953275	0.488626766	0.43570733	0.461768882	0.330620395	0.305466097	0.647037737	0.722974379	0.472345196	0.702756452	0.594146356	0.404247115	0.469260212	0.621000816	0.338886866	0.556589914	0.541612251	0.431522113	0.407621165	0.481970145	0.374051587	0.569524963	0.774895752	0.713812231	0.580441001	0.715366047	0.666156294	0.676564101	0.762685752	0.55176577	0.552954114
0.486539465	0.480713349	0.499283575	0.472773741	0.537369205	0.602466303	0.478932463	0.626449331	0.48665725	0.701147422	0.765947569	0.642525742	0.554493459	0.582437164	0.415519272	0.43834078	0.365919228	0.406260728	0.310267775	0.522085051	0.508024014	0.476997933	0.470910572	0.355187737	0.271281748	0.576993066	0.61390254	0.382606304	0.680757684	0.571659105	0.423012396	0.476691371	0.648498849	0.315095974	0.557567403	0.548822963	0.396670971	0.364237822	0.436236126	0.3667516	0.499759607	0.661187209	0.561292599	0.477925441	0.619125295	0.606786469	0.599063467	0.697569863	0.45070684	0.531955142
0.485753302	0.460210988	0.396260475	0.476328719	0.555111509	0.546545546	0.49936769	0.655944456	0.399003876	0.665834239	0.678198536	0.61263159	0.519376685	0.579901234	0.440624953	0.487935677	0.398463928	0.433341777	0.314859471	0.475098405	0.492783979	0.50559568	0.448782698	0.370381784	0.221354171	0.48690111	0.498052747	0.323340524	0.602447516	0.498724734	0.431809738	0.477425242	0.631984252	0.273279923	0.54186372	0.560194044	0.38755996	0.357290119	0.416594264	0.358571421	0.42153104	0.559638766	0.4186917	0.39318439	0.51098472	0.553561914	0.536251989	0.622828679	0.349043552	0.494051166
0.498649591	0.448902151	0.308386039	0.456811603	0.539376971	0.462606751	0.508022712	0.61862299	0.331818933	0.605315494	0.559497375	0.543822332	0.456630875	0.560925122	0.443592999	0.50668167	0.40720406	0.466378297	0.311585257	0.438443018	0.455671424	0.50551707	0.410783182	0.366240997	0.17765932	0.400687904	0.402702739	0.294988831	0.508646072	0.411393536	0.427773066	0.468964978	0.584167415	0.234020258	0.5131652	0.564710091	0.39501188	0.375465583	0.426770911	0.354139451	0.351984736	0.490449902	0.320324374	0.337337225	0.410820879	0.501237782	0.486349066	0.556228259	0.271636345	0.446743711
0.509388932	0.447518991	0.268470575	0.425823483	0.503750929	0.377074331	0.500181903	0.544363489	0.298334772	0.540076476	0.447720601	0.467351965	0.390867856	0.51737236	0.414116973	0.483340693	0.388759934	0.490672101	0.301292527	0.409881146	0.409245023	0.477339181	0.370973652	0.346776865	0.165016116	0.331226623	0.337848311	0.28844148	0.421298219	0.335187195	0.410265246	0.455539712	0.523313315	0.218132844	0.483181768	0.557213791	0.401077017	0.388554515	0.444264431	0.350489516	0.305778813	0.459563739	0.285294131	0.315585587	0.342353662	0.453555127	0.451058388	0.503096258	0.223137527	0.400316081
0.50946516	0.448578566	0.284696134	0.402700677	0.456715129	0.317891242	0.478115239	0.457616672	0.295614408	0.484124003	0.370211834	0.401695248	0.339097626	0.46061463	0.36694953	0.430648803	0.34690134	0.492408587	0.284416389	0.387456652	0.363425138	0.43021125	0.342983554	0.317087063	0.1931925	0.288306459	0.304984123	0.291476301	0.357515928	0.289532462	0.387128133	0.446282149	0.471906886	0.234978256	0.471994681	0.539880554	0.398815079	0.388269836	0.45537748	0.342902987	0.288720743	0.458774275	0.303647417	0.326531137	0.325409265	0.408492503	0.419582318	0.467814238	0.199496357	0.361478967
0.49679488	0.449334382	0.336534865	0.401790896	0.412821185	0.301870678	0.452326746	0.388196541	0.308375104	0.442638153	0.341590173	0.360015166	0.311138652	0.396885104	0.311345049	0.367516933	0.296706716	0.46870129	0.266048724	0.371516119	0.328819425	0.385515933	0.338988775	0.289398589	0.246551153	0.276476553	0.299194956	0.287754906	0.326723031	0.284151863	0.371086178	0.447047029	0.448200185	0.277249272	0.488300302	0.521325446	0.39111992	0.374817924	0.457186035	0.334105278	0.297407789	0.47019476	0.335769886	0.342919562	0.354487434	0.371880843	0.388028315	0.453673675	0.191720281	0.328311099
0.479219164	0.448761897	0.382956945	0.422804238	0.386826849	0.318619917	0.436268907	0.35794294	0.31880515	0.417821123	0.355586417	0.346145572	0.30647989	0.338210687	0.26151811	0.310698934	0.250852477	0.432470223	0.253808168	0.364795178	0.315153749	0.366575819	0.358018182	0.280585484	0.299571964	0.28550168	0.304894054	0.278357967	0.326961663	0.307540102	0.372734225	0.456884115	0.461080221	0.32485492	0.52366876	0.511702656	0.387504439	0.356985411	0.449246575	0.335540156	0.310920743	0.473844374	0.350939066	0.35649834	0.38995274	0.353401236	0.361953029	0.459727249	0.190727373	0.30084585
0.47242055	0.449300799	0.406884021	0.449667248	0.395775556	0.346184468	0.433155946	0.371174955	0.319123469	0.410442288	0.378644057	0.355108758	0.312683532	0.301452835	0.232430773	0.275207378	0.218051091	0.399148157	0.253341247	0.361296037	0.319250604	0.386841631	0.386779742	0.299624118	0.328982287	0.307578807	0.31050016	0.270203251	0.347942536	0.335296849	0.386940488	0.469095867	0.496066525	0.355363547	0.566461353	0.51661436	0.395190713	0.35089467	0.437034921	0.356853996	0.326030626	0.472060465	0.346847689	0.361630414	0.413661052	0.356858629	0.353875438	0.474416163	0.186392342	0.28349742
0.484362582	0.457199185	0.400154477	0.468265868	0.42649902	0.368210722	0.441060956	0.405910717	0.309639378	0.412797892	0.390198513	0.371219744	0.316557723	0.30847117	0.23493954	0.268672642	0.203349489	0.389128514	0.259423223	0.363372169	0.348526592	0.430318435	0.419904493	0.336067304	0.319446387	0.334904687	0.317842131	0.269814409	0.390158135	0.358645862	0.406927971	0.476221829	0.533425326	0.355069915	0.602037873	0.543211925	0.414367646	0.373624923	0.42917387	0.401872356	0.343485395	0.472306652	0.328240144	0.35913399	0.416171389	0.369267386	0.364164227	0.493873061	0.187290324	0.280166808
0.510067269	0.474182818	0.375662046	0.473270918	0.470277145	0.374870282	0.460608776	0.444242489	0.296710068	0.427976685	0.388413311	0.390357628	0.319034245	0.347838331	0.259237991	0.285565898	0.211325107	0.407773807	0.26947461	0.374941057	0.392719838	0.478378899	0.45327016	0.378160477	0.277415125	0.358408046	0.328516109	0.284689675	0.443425669	0.371818774	0.423883554	0.475397203	0.56009048	0.324883821	0.614768681	0.577590079	0.43798343	0.419527221	0.431346997	0.461901131	0.366419467	0.481123771	0.308240289	0.349749367	0.399191405	0.38355558	0.391939144	0.511945808	0.20008351	0.291615454
0.540121194	0.498407033	0.356402735	0.470318382	0.514901616	0.367249984	0.482082017	0.471155143	0.288739415	0.452706824	0.377300758	0.408937474	0.327337415	0.401003684	0.292960793	0.31302479	0.230303881	0.444865092	0.277067346	0.392266076	0.435403385	0.51241551	0.478782618	0.412369915	0.224865721	0.371732557	0.340038603	0.307582429	0.492973848	0.370112003	0.432067546	0.465567218	0.573241978	0.280504548	0.601503814	0.604345242	0.455926668	0.470353521	0.440208522	0.51546177	0.395900445	0.499453497	0.305731343	0.341582923	0.373279171	0.390062546	0.427151318	0.522878348	0.224606566	0.316408442
0.56407052	0.524521167	0.359661725	0.465672002	0.550280671	0.35373786	0.497284581	0.481337244	0.290535705	0.478328215	0.365271045	0.423693249	0.342174494	0.444972785	0.321184986	0.341259852	0.250679128	0.478753098	0.278757633	0.408788741	0.462767023	0.521813515	0.491696406	0.427643035	0.182383163	0.372999378	0.349408705	0.327213639	0.525775755	0.355774962	0.429880882	0.453412344	0.576071441	0.239604276	0.571731697	0.614747306	0.458558378	0.50510526	0.448943049	0.539522198	0.426278737	0.522212136	0.324897915	0.343359215	0.353356894	0.386409863	0.457037839	0.522175015	0.253242093	0.34451947
0.574129322	0.544534936	0.386453566	0.472717879	0.563605782	0.344211848	0.503459731	0.479574607	0.298055702	0.495221034	0.36052955	0.430828356	0.360264963	0.461847467	0.332946859	0.362075693	0.266996596	0.496066651	0.275890372	0.41962812	0.470879349	0.499324672	0.490331598	0.424404492	0.167306281	0.36155497	0.354819184	0.334920144	0.526634679	0.335902034	0.422824663	0.449846579	0.574651085	0.215966279	0.541003654	0.610363759	0.4451575	0.507824195	0.451962261	0.524480137	0.450756578	0.540484121	0.353352925	0.35942251	0.352861912	0.378611997	0.471760902	0.511997614	0.274441975	0.362672315
0.573291313	0.551188546	0.422257808	0.494541825	0.554561202	0.350510079	0.503170476	0.467611673	0.307300428	0.497847639	0.364970481	0.425567811	0.375959385	0.440206873	0.324930504	0.371809391	0.27731436	0.48863717	0.273221772	0.42401628	0.459955899	0.459967008	0.476197027	0.41273933	0.182028667	0.348649208	0.355055957	0.329379982	0.5011798	0.319553212	0.41828187	0.458496234	0.581279114	0.214331735	0.521926748	0.591050678	0.424086588	0.473210665	0.448574945	0.481278097	0.461833309	0.547650721	0.375576176	0.385005761	0.371473775	0.37798891	0.46627773	0.499257401	0.277907019	0.360706016
0.572083232	0.547019514	0.447492276	0.521598799	0.530785162	0.373794239	0.497665801	0.459771231	0.317271771	0.481094804	0.372873754	0.411654671	0.384315124	0.392622808	0.299573353	0.365996455	0.278737125	0.465957485	0.273807484	0.421100373	0.454746657	0.424164311	0.455046018	0.405015692	0.21257327	0.344733932	0.351028704	0.311453896	0.470686348	0.314488675	0.419857255	0.472023531	0.598750699	0.22904392	0.518102387	0.572437489	0.40727217	0.422722111	0.441627353	0.436545608	0.455666298	0.543625724	0.38337914	0.412909368	0.39296501	0.391202137	0.448159595	0.491289443	0.263551262	0.341891347
0.579796045	0.540196945	0.450095354	0.538127747	0.501588037	0.404511424	0.494677116	0.462634165	0.328440061	0.455568622	0.377740408	0.396512929	0.381208493	0.342854457	0.272710533	0.351451013	0.276896448	0.445990316	0.28078507	0.416614675	0.477677393	0.407816516	0.436169682	0.407646951	0.239244462	0.353678049	0.346968196	0.292239575	0.457001992	0.323953087	0.425127301	0.482017472	0.619620165	0.246180646	0.524103438	0.565367817	0.402560338	0.383132378	0.436822599	0.417777255	0.434591983	0.534043859	0.37237028	0.431474165	0.405675553	0.417476537	0.428843759	0.491531834	0.241269251	0.314141384
0.596243113	0.539200322	0.431883857	0.53288166	0.474006014	0.42979606	0.49692035	0.472173935	0.340518559	0.435932484	0.377349486	0.388034405	0.372381079	0.320387988	0.262651793	0.339789266	0.278028961	0.443531887	0.292139694	0.416039198	0.533730648	0.416338481	0.428829	0.417039137	0.251696676	0.370603586	0.345195125	0.281378342	0.46973484	0.344548554	0.427962505	0.483981721	0.631784428	0.254495164	0.530578976	0.57112797	0.408844765	0.375135328	0.44102666	0.437041185	0.405930381	0.525401556	0.35067564	0.431716796	0.405444928	0.44517269	0.416026962	0.497712383	0.224130821	0.291197057
0.610102455	0.546540459	0.40515982	0.507043333	0.451536789	0.436862661	0.501001397	0.477825534	0.350303296	0.433462291	0.374019315	0.390229407	0.36484789	0.343024579	0.275958607	0.341033732	0.285143271	0.460738259	0.302140913	0.420010296	0.604555817	0.444281446	0.437020714	0.422029446	0.244168459	0.384666853	0.344870604	0.284976065	0.500051957	0.366605062	0.423314844	0.473588867	0.626188947	0.253685285	0.530542028	0.582932578	0.417077969	0.39838885	0.454736559	0.483103597	0.377891318	0.519950066	0.331091549	0.411838789	0.392758952	0.459746287	0.409959266	0.503592354	0.219511862	0.288429711
0.605715362	0.556040021	0.382849604	0.474149524	0.435141074	0.423324912	0.500614989	0.470540775	0.350987158	0.449112238	0.372012934	0.400450123	0.36172552	0.397740363	0.306326177	0.358989518	0.296251813	0.485725368	0.305081122	0.424034818	0.656489604	0.479215931	0.455811488	0.411098779	0.224255628	0.385425219	0.343052838	0.29809923	0.525539703	0.377801935	0.412231897	0.455159074	0.601826822	0.243920026	0.522737104	0.591708083	0.420021736	0.434177541	0.472476268	0.527076494	0.355463002	0.514336128	0.321397939	0.382341913	0.37512777	0.45205257	0.405534054	0.503170467	0.224367713	0.305273172
0.577219116	0.556323639	0.369584647	0.452059903	0.424754207	0.396783681	0.491778669	0.449712536	0.342007436	0.474080862	0.373293372	0.410533657	0.360209786	0.45496887	0.338708007	0.388899531	0.305540191	0.500134118	0.298886921	0.421832944	0.658902563	0.507321954	0.472442511	0.38123395	0.201337008	0.369329303	0.337419566	0.30935048	0.52397285	0.371030229	0.399277584	0.443129052	0.565634621	0.228729865	0.511771178	0.592028213	0.413161215	0.45737577	0.487298802	0.538616514	0.339098359	0.50466704	0.320913951	0.351968459	0.361359392	0.426301687	0.39800382	0.495375964	0.228188609	0.326465902
0.533633518	0.539002279	0.359909873	0.452076851	0.41953243	0.370406527	0.476575545	0.423524039	0.322441908	0.495567954	0.376084456	0.411858668	0.354659421	0.492215971	0.359752081	0.418731967	0.306767815	0.490989946	0.286484038	0.410367216	0.602552589	0.518545312	0.472820413	0.343513702	0.182518148	0.342619466	0.328640293	0.311665007	0.48799872	0.350417967	0.38912644	0.449904535	0.528394818	0.21405075	0.50231754	0.584730037	0.398127949	0.453560281	0.492643771	0.503321448	0.32687424	0.489747196	0.323358309	0.330572936	0.356124243	0.39680219	0.387054704	0.483318062	0.223146703	0.341048542
0.488265171	0.506291635	0.345254975	0.472051642	0.419160924	0.356093225	0.460289493	0.402142368	0.296425695	0.504919465	0.376922842	0.401429324	0.342670853	0.494533187	0.360426108	0.434195226	0.297011349	0.459513634	0.274305668	0.392863804	0.506854665	0.510097578	0.450295828	0.307216588	0.171849691	0.315593896	0.31879323	0.30532331	0.431558203	0.321699057	0.384562423	0.475495626	0.499885489	0.206231016	0.496029559	0.575385385	0.383109211	0.424419531	0.487322126	0.439952842	0.316552554	0.471696467	0.323075957	0.324814767	0.358444571	0.376324742	0.376050717	0.472029759	0.207734573	0.344199273
0.46346273	0.469788199	0.324985127	0.497721754	0.421606663	0.358657659	0.449547524	0.400414472	0.274649392	0.501099944	0.373719475	0.384130127	0.327724092	0.462416584	0.34469298	0.425714025	0.278677256	0.421373489	0.268985167	0.375066949	0.411058012	0.487541873	0.411329491	0.282731163	0.170376335	0.298369987	0.311656527	0.292140587	0.376815421	0.298141944	0.385207878	0.513982896	0.486079811	0.20445495	0.491953869	0.570405598	0.380512392	0.385767448	0.477082767	0.370867494	0.308289427	0.460331091	0.319055605	0.341829377	0.365739698	0.374134994	0.375695101	0.466850942	0.188574672	0.336605559
0.476569071	0.44784841	0.300738365	0.511379437	0.424367627	0.373788279	0.452608419	0.419241802	0.272677504	0.490914205	0.367279547	0.371575162	0.321870718	0.419031837	0.324365562	0.394052298	0.258609415	0.398047484	0.274096708	0.364839198	0.345170165	0.46279088	0.370852718	0.278411279	0.173601627	0.302165303	0.316972367	0.278611875	0.352272725	0.297244154	0.387360893	0.554459659	0.488955441	0.210154661	0.490562947	0.573482247	0.39559459	0.364204028	0.47103512	0.320484475	0.309645998	0.468672012	0.316008344	0.367105848	0.375105902	0.38479918	0.388670792	0.473910398	0.186809102	0.330146029
0.517212421	0.454926881	0.283455241	0.502561741	0.426239594	0.390580274	0.468861631	0.44655465	0.294184854	0.482657064	0.366666032	0.373908242	0.333675743	0.388886715	0.311498701	0.351210847	0.244649645	0.404315719	0.288499653	0.374942651	0.333439633	0.448898986	0.349995603	0.293208837	0.179265847	0.324148193	0.33483429	0.281845114	0.373170999	0.322470453	0.389530502	0.583358973	0.507405213	0.22188177	0.493599125	0.584105116	0.421268553	0.379498343	0.477049531	0.306311191	0.323512161	0.494549431	0.318099126	0.389056229	0.384941165	0.39643534	0.410155672	0.489307047	0.210133703	0.336454546
0.557617005	0.485973916	0.284055784	0.474456171	0.429295196	0.39734448	0.489443728	0.46550539	0.328929714	0.479675974	0.37659119	0.391778726	0.361491571	0.383789062	0.311056995	0.315237647	0.241405227	0.439220843	0.306821453	0.400279627	0.3659884	0.453091861	0.359921797	0.312354955	0.186923479	0.350151164	0.360775211	0.305775036	0.424444624	0.360428762	0.393894053	0.592523776	0.537461082	0.235336089	0.505158518	0.598174378	0.445407861	0.427146994	0.497541606	0.334992232	0.345871272	0.52461648	0.324865194	0.398848029	0.39468275	0.401283833	0.43103127	0.507858587	0.249308333	0.357113854
0.576605044	0.520099493	0.303688244	0.442556832	0.437032737	0.388071819	0.507213605	0.466643982	0.36105296	0.478135422	0.394951273	0.414695768	0.391201159	0.397366724	0.318192169	0.300965965	0.247520775	0.485804725	0.321599819	0.427040714	0.409675264	0.471371106	0.393073164	0.327805848	0.195769152	0.367244105	0.390458619	0.346455086	0.473708582	0.395559601	0.40270919	0.582509555	0.571586544	0.246028408	0.527643007	0.609645839	0.456480088	0.484551689	0.527551107	0.376714405	0.368886192	0.543293734	0.331166432	0.396158953	0.404413894	0.405856311	0.445584732	0.527603927	0.285456459	0.380567922
0.562013388	0.534950975	0.330675694	0.426809124	0.453879353	0.366747354	0.520776415	0.445747411	0.377774872	0.47085433	0.4130506	0.427451289	0.404829807	0.410991396	0.321793659	0.311576264	0.256118852	0.519854432	0.326097141	0.442854003	0.43024151	0.48859611	0.42747177	0.334419356	0.204777978	0.370134769	0.421409191	0.397309852	0.49576782	0.410442475	0.414655582	0.559549489	0.598646526	0.251586804	0.557064796	0.612296017	0.4477767	0.528522058	0.556052373	0.41145039	0.385602955	0.538212358	0.333206813	0.384490998	0.414001018	0.422542216	0.450049531	0.550471866	0.302598558	0.388843945
0.520174115	0.518999672	0.357638725	0.442057065	0.481413833	0.347556835	0.532095412	0.417955851	0.375318463	0.45480756	0.422953251	0.419445575	0.38948357	0.407189516	0.3123972	0.33625799	0.258510232	0.522804817	0.316831576	0.441881778	0.420888936	0.487998426	0.4420135	0.329656745	0.213465285	0.358298877	0.448566994	0.453343658	0.476708361	0.392971036	0.423529607	0.530677547	0.606512834	0.254541786	0.581070317	0.602390434	0.422220808	0.540918578	0.570198977	0.429276155	0.390801729	0.508412316	0.334320691	0.38609782	0.427877056	0.468282269	0.45423603	0.57819672	0.289704005	0.370718741
0.484543271	0.481436732	0.380772385	0.491995157	0.516737564	0.350531945	0.551878661	0.409672593	0.363899661	0.437039237	0.420580587	0.395115006	0.353327438	0.382404862	0.290021274	0.356353104	0.250595079	0.491996184	0.2998558	0.422201997	0.386492591	0.466809877	0.42476853	0.316055624	0.223421491	0.346643914	0.477793092	0.503093415	0.42538265	0.351817543	0.423080502	0.502126859	0.587489835	0.262750005	0.585372006	0.584915861	0.398108127	0.520967144	0.56106867	0.430587466	0.393305173	0.476022449	0.349626386	0.424254695	0.45757947	0.549912307	0.473975653	0.618393512	0.26518425	0.330540504
0.492433302	0.455851008	0.405278399	0.569123382	0.554004708	0.393880878	0.593785804	0.445365483	0.369816117	0.43433007	0.4188763	0.37613991	0.325026643	0.351601236	0.267390654	0.357442859	0.233837002	0.44474963	0.278647172	0.403795361	0.355457167	0.424601949	0.386203125	0.301839505	0.23701671	0.357693282	0.518255756	0.547614949	0.377244427	0.313343595	0.410084482	0.477449954	0.551222639	0.28400412	0.565792629	0.561409175	0.396726883	0.491630997	0.528717503	0.419711805	0.412189383	0.473447823	0.400145222	0.511203912	0.516104026	0.65757091	0.52284481	0.675701986	0.265080415	0.292508315
0.564374105	0.480028471	0.442398305	0.659429673	0.588530822	0.485672781	0.664595736	0.534991654	0.413946295	0.46575831	0.441801238	0.392090215	0.341333414	0.342040911	0.266320189	0.340698979	0.219173163	0.403399175	0.261379522	0.412592745	0.358546423	0.388372945	0.357140403	0.29497852	0.254473797	0.408891265	0.578000154	0.592372788	0.371122383	0.311086219	0.389225198	0.459024073	0.506635531	0.319146721	0.528937736	0.538587773	0.431778177	0.483095509	0.484256525	0.416341124	0.466420357	0.526366514	0.500306041	0.639589387	0.610519825	0.768114743	0.604330466	0.748103773	0.324347135	0.297742356
0.69086953	0.573029149	0.498853891	0.74816255	0.620677114	0.618192685	0.75911585	0.667296637	0.496616015	0.541916361	0.511535423	0.464749353	0.426890971	0.379653306	0.308522177	0.326221314	0.222207761	0.391969934	0.258812965	0.46762486	0.409173017	0.39539023	0.372020888	0.300143437	0.271224	0.503412261	0.659516779	0.643687296	0.429840805	0.3702742	0.380421721	0.453417969	0.474679841	0.358209581	0.487639536	0.530762299	0.50204455	0.516295381	0.447463166	0.435967152	0.563078538	0.637827184	0.645156994	0.782210359	0.733995338	0.856574976	0.708749774	0.826400593	0.455599382	0.372389806
0.835537142	0.720023183	0.567628549	0.823399183	0.65623991	0.767737793	0.860592474	0.812530269	0.593862733	0.656998407	0.632774938	0.594033629	0.577579791	0.475254366	0.404963431	0.34492295	0.256449049	0.422650937	0.278816119	0.570179019	0.49707582	0.470434564	0.44991512	0.317786296	0.278178865	0.626847769	0.757196531	0.704987788	0.549127342	0.494583188	0.409042577	0.467909756	0.475909502	0.383146966	0.474418434	0.549502847	0.590953341	0.591235117	0.440097219	0.48319305	0.689958988	0.782798098	0.805819579	0.901248554	0.862785658	0.908361881	0.816413018	0.896980413	0.637867862	0.516318469
0.950410791	0.874975324	0.627668828	0.876515994	0.70205908	0.900790702	0.946452276	0.933524439	0.668631827	0.788612781	0.783877949	0.753729087	0.757769549	0.617576213	0.548726612	0.422000084	0.325485072	0.49109812	0.318422206	0.700842963	0.596278169	0.604734187	0.582559381	0.34523849	0.266164069	0.751460627	0.857663053	0.77443445	0.699864401	0.661630261	0.490636757	0.504798241	0.518711337	0.377028255	0.508208646	0.592925372	0.673211899	0.686219388	0.47709505	0.551180706	0.817450705	0.917198143	0.937886758	0.963374938	0.962130024	0.92452483	0.905025475	0.946246387	0.82277645	0.700843265
1	0.981320146	0.654339456	0.901159314	0.758949586	0.984869499	0.996539938	1	0.691130517	0.905793865	0.921796835	0.900251838	0.914267139	0.776190571	0.714793581	0.560463849	0.422797616	0.577303724	0.374717545	0.826376406	0.681317147	0.772949756	0.736504635	0.37878544	0.238554902	0.84619261	0.942828313	0.84460502	0.841461039	0.829753247	0.622146597	0.560062672	0.587182026	0.336267968	0.586451084	0.65609121	0.72524132	0.768052665	0.559235779	0.625850606	0.909621672	0.997385948	1	0.953773458	1	0.917161783	0.957315758	0.964490228	0.955610803	0.876515165
0.975966639	1	0.634737654	0.893071054	0.816595759	1	1	0.999508702	0.656295499	0.981023115	1	0.990524959	1	0.912411737	0.867093921	0.734191723	0.530245557	0.661765515	0.437465854	0.913188425	0.740984247	0.921644517	0.868469062	0.415384183	0.200552653	0.888019943	0.994629772	0.904077565	0.938764132	0.953343861	0.779559341	0.624435013	0.664922724	0.277960852	0.689991825	0.72507876	0.734433398	0.807481307	0.670797323	0.691537253	0.93919855	1	0.973230695	0.882124219	0.962190766	0.898732444	0.965401789	0.947774587	1	0.986265984
0.897785497	0.929282854	0.577692386	0.851759877	0.8547358	0.945942896	0.957980914	0.940275734	0.587370676	1	0.990500217	1	0.994603081	0.992861624	0.970040833	0.895471294	0.625373306	0.725726508	0.492115295	0.94071657	0.781076713	1	0.945366888	0.453056053	0.170287572	0.869773782	1	0.940243638	0.974184869	1	0.919701424	0.683944994	0.728583192	0.225298705	0.79630787	0.780163515	0.703068799	0.791789599	0.783854855	0.735320052	0.898806246	0.931627816	0.870465008	0.777299948	0.860175913	0.87297038	0.930814006	0.897848218	0.952794159	1
0.799746886	0.804976855	0.510820007	0.782768732	0.851547112	0.841770342	0.881653511	0.845339521	0.522701599	0.964599935	0.897840898	0.93180252	0.910865703	1	1	0.9942907	0.689266833	0.759487318	0.526410041	0.908199882	0.815233255	0.985213273	0.95788257	0.489806325	0.169443643	0.80132526	0.954647492	0.942561946	0.950371212	0.961976142	1	0.72788021	0.762164068	0.207466324	0.871561184	0.809608249	0.645535746	0.728584568	0.867902902	0.749154607	0.802874439	0.823414639	0.730065332	0.673232884	0.726433981	0.833631176	0.861622296	0.821172258	0.84155067	0.920541143
0.712766422	0.680788079	0.465167964	0.698071417	0.795498814	0.717732856	0.787252762	0.741572335	0.493198996	0.888662743	0.756858284	0.812929441	0.784411517	0.936146731	0.952367566	1	0.712410315	0.762845048	0.534224861	0.832085275	0.85080243	0.892780023	0.920485081	0.521850302	0.209508794	0.704140345	0.864556254	0.905503667	0.884172746	0.857178382	0.996422112	0.752646306	0.764376484	0.238941785	0.902234279	0.815538378	0.580784631	0.639913482	0.900852563	0.730519781	0.679809017	0.714146296	0.596916829	0.593112665	0.599091084	0.771551552	0.769146569	0.728096376	0.707245387	0.779775958
0.651458945	0.60003572	0.456499041	0.613034935	0.694025405	0.603052541	0.690820318	0.649242979	0.50400465	0.790195293	0.615150359	0.680403199	0.653767501	0.820690263	0.841895631	0.914325579	0.696067553	0.741672263	0.516873126	0.736394567	0.879802217	0.766913588	0.85896778	0.542532993	0.277390367	0.602117413	0.744666077	0.830485415	0.79662922	0.719866248	0.913202692	0.760624598	0.74570229	0.308846243	0.892366533	0.811668162	0.524074082	0.550908461	0.876620761	0.68253598	0.559230043	0.631590857	0.501296159	0.540111813	0.504360754	0.684525291	0.66588383	0.632267075	0.583114892	0.622727425
0.612624704	0.574800077	0.475272282	0.54085927	0.575982089	0.515350703	0.604749892	0.576806271	0.531683322	0.684828877	0.510000463	0.565232116	0.543001906	0.682603714	0.696627424	0.76916986	0.649133572	0.703324573	0.481543349	0.641838437	0.881484756	0.656435013	0.793908222	0.543223519	0.352050117	0.512983594	0.614951014	0.726167957	0.704446576	0.585871182	0.779553654	0.755022971	0.719121111	0.383009901	0.857156258	0.81357114	0.482003668	0.479384161	0.806068969	0.613661946	0.461213829	0.582297815	0.447261973	0.49942685	0.446951065	0.582544738	0.564537687	0.549368716	0.481912791	0.488363489
0.583814978	0.583873337	0.492411281	0.488062042	0.475312696	0.456583309	0.5367312	0.522321323	0.538900694	0.586063767	0.452599874	0.482262836	0.456369619	0.551313628	0.548132608	0.610731268	0.58272446	0.653466531	0.437854157	0.559373314	0.835232234	0.589927951	0.730388576	0.516508251	0.403511217	0.443813688	0.49496587	0.606779598	0.616255466	0.479305836	0.635549468	0.734873267	0.690940387	0.429958882	0.812145782	0.827213352	0.452736561	0.431294195	0.711239042	0.536270275	0.392452174	0.554514396	0.41653679	0.459722774	0.413860401	0.488162916	0.478644245	0.494225788	0.397753156	0.39658365
0.554863194	0.589528006	0.477887595	0.45635416	0.418444358	0.416893211	0.490288389	0.479272836	0.497755865	0.508708796	0.42784383	0.429793225	0.39577844	0.448670186	0.421820185	0.478637887	0.505687631	0.595511855	0.394232536	0.490548939	0.735561551	0.564232449	0.659801878	0.460533142	0.409771548	0.391946325	0.405324309	0.488689	0.533755933	0.406484108	0.514959631	0.694539444	0.657861387	0.42678145	0.765169696	0.843253474	0.431196784	0.402960654	0.615987137	0.463587683	0.349588205	0.531125686	0.391200991	0.414314459	0.390480238	0.419898496	0.418658398	0.476388262	0.322173524	0.346414934
0.524615326	0.569808944	0.427324378	0.437873265	0.4141861	0.38973903	0.465606547	0.44691909	0.426225519	0.454068157	0.417670318	0.40077179	0.349956991	0.383982988	0.335406489	0.390963502	0.423251258	0.532164307	0.355595907	0.439441678	0.599372354	0.552149074	0.571559741	0.396688846	0.369931071	0.357168023	0.349731158	0.393297134	0.467016464	0.363621666	0.437873494	0.631211692	0.613294691	0.375530686	0.715669302	0.841552186	0.414509165	0.38796619	0.537546469	0.405638634	0.32589224	0.505999058	0.359789081	0.362254401	0.369472947	0.382377827	0.384946374	0.495899982	0.254757608	0.323939658
0.499454191	0.525443347	0.358182908	0.425168116	0.448884071	0.36664906	0.459843957	0.423042225	0.342509941	0.42303011	0.402414011	0.383439201	0.315731103	0.354320074	0.287658536	0.345095916	0.34598387	0.475002386	0.322993989	0.402586541	0.471689763	0.526349593	0.481514671	0.335243992	0.303722806	0.331918152	0.323242948	0.328647591	0.415022904	0.338483889	0.399804965	0.56095261	0.564946593	0.306247758	0.660557791	0.803966548	0.40087503	0.380034289	0.484952084	0.369517018	0.315774555	0.479980779	0.322535862	0.315917673	0.361673613	0.369163845	0.373565721	0.541809803	0.197639921	0.313729944
0.486234177	0.470274011	0.295239783	0.417940893	0.491762113	0.346491593	0.467097957	0.408289615	0.276945856	0.414933574	0.376531062	0.371446904	0.298393395	0.347601006	0.267998394	0.324760344	0.281844838	0.428479351	0.300246485	0.378946137	0.377939217	0.483494409	0.397563838	0.288869766	0.241612573	0.312360515	0.316540693	0.293529272	0.376411176	0.319316098	0.386498145	0.491096119	0.51511785	0.248532804	0.601346367	0.727853672	0.392668323	0.37672954	0.455851878	0.351786567	0.315406789	0.466165078	0.297806921	0.302002436	0.385688587	0.367327581	0.376497093	0.595234715	0.161540371	0.306836842
0.485753302	0.431686201	0.267861499	0.42154422	0.515712549	0.335221388	0.478863574	0.403502044	0.258053151	0.422956765	0.34995102	0.3641464	0.30800426	0.349076805	0.263324826	0.311190895	0.233048947	0.395902366	0.284754982	0.369210169	0.334554552	0.429078804	0.33587869	0.268483708	0.205438195	0.298934679	0.31968968	0.281770466	0.352030503	0.302294713	0.383566652	0.436124123	0.474165383	0.221189502	0.546741396	0.640371854	0.392595222	0.377747711	0.442450705	0.345228117	0.320984926	0.474778823	0.304555971	0.335144845	0.45140377	0.36833456	0.384144039	0.636540689	0.174670109	0.302706987
0.491731671	0.432980999	0.282591071	0.437262184	0.50774469	0.339287044	0.485772144	0.406988561	0.286697104	0.431625229	0.347079468	0.363091266	0.331264695	0.347314701	0.263189327	0.295487919	0.203092667	0.379945477	0.274109786	0.372410441	0.336687744	0.38373728	0.311268003	0.277996064	0.19801435	0.294366913	0.318911068	0.284625374	0.344210423	0.291281655	0.383824858	0.419527049	0.458261963	0.224648729	0.508598063	0.563038423	0.398315799	0.381949678	0.437535378	0.342342834	0.3288523	0.503288934	0.339333472	0.406669038	0.544971449	0.380198553	0.392244727	0.65366367	0.2310898	0.304588296
0.495640762	0.466947539	0.313037327	0.464092375	0.478031428	0.352123675	0.48659459	0.409964577	0.31896215	0.436298997	0.370777498	0.369080862	0.354043463	0.338593064	0.258269382	0.280868222	0.194593082	0.380884382	0.266835379	0.377094163	0.361380938	0.377024316	0.326478904	0.294312727	0.205524714	0.293447775	0.313159367	0.286728372	0.343696612	0.288182527	0.384355805	0.451846442	0.475566436	0.242187661	0.494237827	0.517450687	0.404654688	0.384806913	0.436845007	0.338730153	0.331796484	0.533011952	0.384566712	0.499901963	0.634963784	0.418286075	0.408399002	0.647356392	0.307304261	0.314322276
0.493494257	0.509190758	0.335202772	0.492580134	0.440252811	0.367853974	0.478980298	0.408978917	0.340724748	0.43460562	0.415092334	0.381672595	0.361280027	0.326608646	0.250737639	0.273983141	0.199535612	0.387993084	0.262709511	0.378240697	0.372819523	0.412077931	0.35806865	0.307720253	0.207863835	0.300862406	0.305427104	0.284367274	0.361354725	0.295257313	0.390357362	0.510207406	0.507048038	0.246408738	0.500986636	0.518015303	0.406659597	0.382282298	0.436768647	0.333166292	0.324038976	0.548198823	0.421701196	0.592076956	0.681707268	0.492317264	0.442155967	0.63022465	0.383243692	0.329726379
0.48776485	0.542461161	0.333444122	0.507304109	0.412551281	0.380910036	0.464637256	0.40615374	0.338920555	0.432178389	0.46627597	0.400272742	0.349477307	0.319359968	0.245859512	0.289080413	0.209087748	0.397746293	0.257300212	0.377242506	0.366927969	0.460247249	0.38655512	0.312401002	0.190744133	0.320306422	0.304875145	0.283465595	0.394367305	0.316280568	0.402653115	0.577390363	0.538122038	0.227578454	0.517295029	0.55454743	0.400318396	0.37395168	0.437669715	0.33416232	0.30659523	0.538993752	0.43584293	0.656737676	0.660813811	0.597209241	0.499686832	0.619494561	0.444189807	0.34616626
0.485147682	0.556854858	0.303223167	0.497300931	0.408734814	0.390326903	0.449019219	0.408172746	0.310541072	0.437407433	0.512528177	0.426539147	0.328544637	0.3330885	0.248103752	0.324186976	0.219636884	0.406873089	0.252539964	0.381897565	0.346570084	0.497463327	0.396598374	0.305182673	0.157403827	0.349135538	0.324120051	0.292960815	0.432879686	0.340679103	0.416948225	0.635032225	0.554970889	0.193732251	0.530014013	0.588073781	0.38911191	0.369524502	0.440900549	0.35025638	0.296724167	0.513242611	0.430120878	0.676229294	0.577757709	0.706243161	0.577253379	0.626944174	0.468127939	0.359644307
0.489669726	0.554159618	0.262740619	0.466364072	0.431453415	0.402899399	0.444581194	0.423052885	0.272620568	0.455591409	0.543661344	0.464092478	0.324878358	0.36487539	0.269142579	0.366141398	0.229193778	0.411172613	0.250772638	0.403001379	0.326550743	0.507766663	0.386694587	0.289280884	0.125604047	0.384612019	0.366478156	0.322056049	0.463239637	0.357732824	0.426376858	0.664910332	0.54944302	0.163679695	0.532778502	0.600565695	0.38790586	0.383812209	0.447846116	0.387125763	0.313291921	0.493723861	0.426544712	0.657732673	0.476501098	0.781341042	0.658810704	0.651332742	0.462936533	0.369898675
0.498164221	0.548685178	0.240104264	0.434778858	0.468201775	0.431461685	0.45591119	0.455292691	0.249670399	0.484824042	0.565697029	0.510806475	0.364626911	0.401660437	0.301938873	0.399799602	0.236562713	0.40953906	0.259443418	0.448425363	0.339101192	0.483755679	0.367404376	0.275435753	0.123326618	0.42474557	0.431031447	0.376986112	0.474072904	0.362661743	0.425546669	0.663465957	0.525437453	0.16780514	0.529404627	0.589292677	0.409470855	0.430133635	0.461106532	0.445922773	0.370352827	0.505176161	0.451324457	0.618832434	0.391521969	0.796444623	0.72071402	0.677718981	0.44327239	0.379833637
0.502833165	0.554023986	0.258856739	0.430769211	0.513916092	0.485834326	0.488146049	0.502408015	0.24681333	0.515801436	0.591176353	0.563223895	0.452243465	0.426824419	0.335282375	0.415775514	0.240719644	0.404344802	0.279202118	0.516173107	0.387966333	0.44237974	0.34671092	0.277308127	0.169710843	0.463843049	0.513206081	0.457545594	0.452384859	0.358487748	0.414945373	0.644132482	0.498403625	0.220570525	0.529641901	0.563251675	0.460738191	0.512509454	0.484509654	0.520830346	0.467421704	0.558640143	0.515743855	0.575837524	0.349088308	0.748608599	0.741829094	0.684580901	0.419556941	0.392601547
0.497498459	0.572682108	0.314385942	0.475253735	0.564029422	0.563738062	0.541715314	0.55273716	0.272729435	0.533812412	0.627426506	0.611720071	0.562570749	0.429628371	0.358430881	0.404003227	0.242412437	0.397866539	0.305103288	0.588257894	0.457624583	0.405743656	0.346584586	0.298813934	0.249830763	0.495241785	0.600475324	0.553560535	0.41044999	0.350245562	0.400704212	0.623145414	0.484659482	0.304198724	0.540203594	0.545485972	0.537050692	0.619535461	0.521290952	0.599134034	0.586764901	0.642730064	0.605116033	0.535812039	0.34981976	0.660180052	0.713862094	0.65541805	0.392720421	0.408597405
0.485385954	0.595510394	0.380912085	0.568286718	0.613973147	0.647969537	0.612831493	0.591813036	0.321594969	0.531430822	0.669084267	0.64329879	0.651138311	0.402344135	0.365296671	0.373227972	0.242511913	0.392904802	0.330082013	0.637982895	0.52434661	0.395223092	0.370068036	0.331062354	0.33258828	0.517462696	0.674758172	0.648655919	0.373347999	0.354214902	0.390012337	0.608621629	0.489467315	0.386788338	0.557729782	0.558810632	0.619862283	0.722501214	0.571928849	0.665534627	0.691633802	0.727566004	0.683762583	0.496616857	0.374332851	0.566996596	0.646114835	0.599585972	0.357803022	0.42477547
0.482931796	0.610847344	0.430540553	0.685526365	0.659422718	0.712664052	0.689921275	0.610477243	0.377554134	0.516187398	0.700350394	0.648030222	0.678045943	0.360278267	0.346570284	0.339035137	0.239576958	0.392247134	0.348210547	0.643537149	0.565110497	0.41304025	0.402537565	0.360390841	0.388999353	0.529589678	0.725485793	0.724640733	0.370111724	0.381380481	0.387530907	0.597007982	0.505674914	0.440866001	0.569369232	0.60687106	0.680733476	0.78839626	0.63172581	0.705686415	0.747632339	0.779563747	0.713971619	0.453689995	0.385577292	0.499520067	0.561702266	0.531610805	0.312947148	0.436841772
0.511466065	0.615991448	0.451443392	0.787811891	0.694131632	0.735781414	0.761287566	0.610568076	0.43232523	0.508817951	0.705488581	0.625262223	0.63161512	0.32534295	0.313931082	0.313864823	0.233025268	0.395275958	0.351893945	0.600149451	0.55499329	0.442067176	0.424538916	0.377074286	0.399689823	0.531840718	0.745796245	0.76688072	0.418834542	0.432037391	0.393297826	0.578745056	0.520378776	0.44656735	0.562587407	0.671091443	0.697678413	0.794030042	0.690558333	0.710325196	0.738293959	0.778726044	0.677795267	0.407878437	0.374839973	0.468285342	0.486985776	0.471873092	0.26638267	0.442621374
0.582551345	0.621738403	0.440181112	0.839354071	0.710694834	0.710649421	0.817411688	0.604282995	0.487816457	0.532797881	0.680190579	0.585396955	0.537117346	0.329737692	0.282361678	0.301614251	0.224822623	0.401089118	0.343522146	0.52530741	0.503912596	0.460573265	0.426495497	0.377170041	0.366717727	0.526002323	0.733852287	0.768715502	0.517218497	0.49584477	0.404215054	0.548469839	0.526001938	0.410269283	0.538733221	0.72143589	0.664635829	0.736893114	0.735528159	0.679032047	0.672376772	0.728532339	0.58824402	0.368221069	0.348354684	0.462170367	0.439801406	0.448688771	0.235403033	0.443926022
0.688660469	0.645614635	0.424465245	0.824729761	0.7042446	0.649425649	0.851570149	0.606778208	0.540163071	0.599631208	0.635682833	0.545477402	0.444326901	0.377821078	0.26143956	0.299354511	0.217366259	0.407062616	0.331936691	0.452087073	0.439652929	0.461043044	0.404650229	0.36722221	0.32295763	0.515013256	0.693341158	0.733215772	0.64149924	0.556746164	0.41696179	0.511885305	0.524671976	0.365120182	0.503943684	0.734130943	0.59432712	0.637005009	0.75550289	0.621815915	0.578975407	0.652911205	0.482613533	0.347357894	0.340245874	0.459639028	0.422698537	0.476734575	0.237049629	0.445275891
0.801015932	0.697733473	0.433939411	0.75523015	0.676234579	0.575977566	0.85923735	0.625845856	0.585499452	0.698662192	0.592368764	0.52066704	0.400400723	0.452375456	0.258975784	0.301042473	0.217855072	0.413352565	0.325974943	0.413253444	0.393664713	0.443846139	0.372796505	0.363207317	0.300320577	0.501640383	0.632736522	0.671543602	0.755917545	0.599720749	0.430795208	0.483819101	0.528176766	0.340763935	0.480986686	0.705356729	0.512088683	0.528403018	0.745320724	0.556655941	0.493080432	0.582387884	0.401624808	0.352619227	0.371544862	0.44481044	0.424464803	0.539181653	0.276301599	0.450128805
0.879027016	0.769088689	0.476395241	0.661154783	0.634867611	0.512210327	0.837505124	0.654844977	0.618362495	0.798412338	0.567011673	0.516439754	0.42374041	0.526185444	0.2723949	0.301925493	0.22917117	0.422866853	0.329544092	0.424549656	0.385548523	0.420995884	0.351575209	0.374449903	0.309020343	0.487008289	0.563173491	0.598558334	0.826106768	0.615851652	0.446120041	0.478379151	0.547751366	0.344603015	0.489649222	0.652751381	0.443976657	0.4442489	0.707556185	0.502672289	0.439236247	0.537699958	0.366922067	0.379170078	0.439933822	0.417480502	0.42846958	0.613779996	0.339814705	0.457202489
0.889776103	0.831336285	0.530631452	0.574823706	0.590990983	0.466168341	0.785629703	0.673793377	0.624959915	0.860032856	0.562019249	0.526086756	0.49421887	0.576354427	0.292610587	0.301440629	0.249914568	0.439347844	0.33949066	0.476576323	0.414247132	0.407816516	0.356142228	0.395973229	0.332153637	0.470068212	0.495436132	0.527519543	0.834156091	0.603755912	0.462002886	0.498056601	0.583977867	0.358987417	0.531753499	0.604395481	0.405497454	0.402865716	0.651116404	0.471272951	0.421650329	0.520294767	0.370596582	0.410535781	0.521054945	0.390827564	0.422647765	0.676735949	0.400080488	0.459652202
0.824217959	0.849949661	0.559398897	0.514412691	0.551822524	0.434195605	0.706828085	0.659091544	0.592614304	0.856172938	0.564148268	0.535040787	0.565482671	0.579719186	0.310692373	0.302807545	0.274685499	0.461885759	0.347584282	0.540014564	0.460051523	0.410973495	0.383925048	0.410865479	0.339056185	0.44859582	0.437189185	0.466169496	0.783811161	0.567827893	0.473975631	0.529880253	0.623614764	0.355980073	0.584011049	0.582629964	0.396726883	0.401511303	0.587664097	0.459809409	0.425258574	0.516256523	0.382963996	0.427012681	0.581514263	0.379276568	0.407383005	0.701766063	0.428344834	0.448114574
0.710266867	0.80370539	0.534327829	0.480126082	0.516984089	0.409632989	0.616805725	0.603520838	0.521213927	0.784951673	0.553705309	0.529440744	0.591884282	0.543290378	0.324117836	0.309372869	0.296827868	0.487620852	0.345532262	0.581317669	0.495746212	0.425983069	0.41887337	0.402031893	0.308670993	0.421268339	0.391688073	0.415828918	0.696218969	0.515398664	0.474793984	0.552207191	0.646390213	0.319825169	0.621261072	0.592753285	0.405727821	0.420604911	0.527860899	0.452096166	0.426228654	0.513590964	0.382457612	0.41704133	0.585420845	0.38587108	0.388563725	0.678955869	0.409017506	0.416099896
0.592554888	0.698716829	0.456662331	0.462649212	0.486753025	0.37984981	0.534632544	0.526064596	0.428311703	0.671197678	0.518272584	0.503869925	0.554045787	0.488422542	0.32947211	0.322820398	0.307624342	0.508678358	0.330115273	0.579982026	0.50073246	0.442157212	0.442826708	0.36612064	0.247462439	0.389509147	0.358545516	0.373650171	0.598923188	0.454847135	0.459367736	0.548377129	0.637930368	0.260038307	0.617554947	0.622878734	0.417412512	0.435682001	0.481444336	0.437180937	0.409090779	0.500201698	0.357874152	0.389275501	0.531399859	0.398777255	0.374660047	0.618903249	0.348564479	0.375979965
0.501297015	0.57984454	0.360049051	0.446413962	0.457086002	0.343541963	0.470916495	0.443143915	0.343079206	0.55432358	0.462866904	0.463837048	0.470194556	0.437924059	0.328300551	0.34274565	0.306767527	0.515521273	0.305444082	0.537785087	0.470972279	0.45038633	0.443799423	0.315358604	0.177249025	0.357766261	0.336015011	0.338165247	0.514475746	0.395196775	0.434026724	0.518305442	0.600398386	0.197905472	0.580368629	0.653771375	0.422189828	0.431820622	0.450173218	0.40807128	0.376885334	0.476212799	0.316740191	0.355583253	0.449956615	0.405723471	0.371220362	0.55099813	0.27744792	0.333496723
0.454275951	0.479384488	0.279532187	0.425205074	0.425388988	0.312796235	0.434726965	0.379101263	0.285069807	0.468112365	0.406330065	0.4218784	0.380743413	0.404544229	0.323213434	0.366859787	0.300498573	0.502358197	0.280577351	0.475369359	0.420271046	0.44807279	0.420754588	0.282545571	0.12859304	0.331825101	0.320995479	0.309256878	0.45428094	0.346066009	0.403473654	0.479857623	0.553337147	0.171335589	0.522253812	0.67134414	0.419492273	0.411444646	0.435587638	0.363345544	0.33573189	0.452880591	0.282211718	0.335640314	0.379118099	0.394427294	0.377222144	0.493581131	0.21711778	0.297963366
0.451034012	0.423175835	0.2578933	0.405612288	0.3971526	0.300887502	0.429477071	0.354536288	0.263470578	0.424445166	0.365579421	0.390970489	0.318217896	0.387501235	0.314912269	0.392398482	0.298385102	0.471678971	0.262515572	0.419132639	0.369227927	0.438653752	0.38702953	0.298649368	0.152915484	0.315255615	0.311845431	0.286967422	0.41938678	0.316345439	0.379165688	0.458300549	0.523258236	0.216645019	0.476383236	0.673566067	0.414940798	0.384006219	0.437714879	0.315713107	0.298794824	0.443082194	0.281447658	0.340314215	0.345459047	0.366053746	0.384045859	0.458745514	0.182768458	0.278056262
0.46847449	0.425656473	0.305020867	0.398649528	0.383443016	0.309436326	0.443541427	0.369204496	0.286573808	0.421490711	0.351133117	0.375410102	0.298788893	0.378137422	0.302760907	0.416597063	0.307980847	0.435079717	0.260825695	0.384980311	0.33597888	0.427663108	0.355877598	0.370928507	0.24149745	0.307990051	0.30829573	0.273300719	0.405568031	0.311086219	0.374696388	0.470098535	0.527859451	0.316232279	0.474604735	0.668075566	0.414025856	0.368377324	0.454966286	0.28620276	0.278674935	0.448046099	0.31722179	0.365827772	0.355725404	0.353014191	0.385922529	0.448668786	0.176942681	0.277858736
0.481952196	0.469191345	0.390050659	0.412797858	0.400038074	0.347649107	0.460178062	0.401914045	0.333615297	0.443007802	0.360113595	0.372229131	0.318119405	0.369751943	0.287331073	0.436759892	0.330518205	0.40929884	0.274963605	0.374247789	0.34208745	0.419550307	0.343208787	0.478162458	0.352635903	0.30692946	0.309851023	0.269657703	0.408028033	0.328001276	0.394129616	0.511445794	0.564570483	0.424575752	0.525410116	0.663414492	0.417113133	0.377533359	0.481058989	0.288567807	0.280802144	0.472594182	0.36616624	0.393081667	0.38466621	0.386459195	0.381282375	0.455426149	0.189221579	0.283845378
0.489860809	0.508058987	0.466265293	0.442379582	0.445630317	0.393500615	0.470955248	0.437352165	0.381397487	0.469108088	0.377307445	0.373749501	0.345342871	0.364131215	0.272040401	0.450279481	0.36020251	0.408927226	0.299302087	0.376837693	0.384548779	0.41788397	0.359280554	0.583624503	0.44500748	0.307465308	0.314214179	0.27292996	0.422487873	0.356207671	0.423777438	0.559261336	0.610814129	0.502519481	0.596807028	0.660918055	0.419194435	0.410126362	0.511350377	0.338531726	0.311811063	0.505742865	0.401120812	0.414309375	0.397992763	0.472016031	0.372972276	0.462320728	0.197728239	0.292688822
0.497563596	0.525249868	0.510461724	0.469487012	0.505952992	0.423123435	0.469850101	0.455812103	0.423063936	0.490879338	0.38549873	0.372703595	0.352852623	0.369930149	0.264964656	0.455084528	0.387413808	0.439192594	0.327203612	0.382863754	0.447422832	0.427706749	0.401432183	0.644176899	0.493395794	0.305947637	0.328718417	0.281583125	0.443040888	0.379239646	0.450151571	0.584479007	0.636279321	0.520173054	0.659972115	0.653264753	0.417043358	0.450445773	0.536796016	0.422169502	0.368305514	0.537348107	0.407294762	0.429518148	0.384630089	0.595334628	0.37226807	0.480605129	0.198104416	0.309341931
0.508037082	0.518503141	0.507161492	0.478932329	0.561730653	0.426103038	0.457715724	0.451127644	0.459384021	0.513156886	0.382544739	0.365635908	0.34038825	0.394075585	0.273353371	0.450382457	0.403671973	0.492449641	0.356448935	0.387819054	0.512786022	0.456140708	0.460588201	0.637119384	0.468439914	0.310268285	0.350588492	0.304577938	0.460178593	0.382026825	0.457567339	0.570012833	0.620098108	0.465666187	0.683393937	0.632432168	0.408680799	0.484069887	0.548318778	0.515375418	0.444752008	0.565126397	0.389812649	0.453876762	0.363220237	0.72448521	0.388659645	0.512106842	0.19855652	0.330435482
0.520641868	0.491427488	0.468880152	0.470833068	0.600734275	0.413543436	0.453839993	0.434417104	0.479797496	0.536572548	0.378738787	0.356553216	0.319578929	0.432685376	0.299303252	0.437042791	0.405239359	0.550348995	0.380707663	0.399077686	0.566420162	0.508405932	0.529283001	0.574106391	0.398433714	0.325714135	0.378448407	0.340899968	0.462555126	0.365193382	0.445802048	0.52906828	0.575800579	0.377661331	0.652867054	0.602495816	0.396630429	0.495799654	0.539861303	0.597100285	0.535518494	0.594624855	0.374193566	0.509027993	0.365104049	0.809361189	0.422485976	0.558067995	0.208251905	0.35427052
0.530861978	0.463830261	0.426851984	0.458326399	0.613242557	0.401602871	0.476171252	0.424903603	0.488248826	0.558774265	0.39068908	0.357277887	0.314625496	0.468911722	0.336436711	0.417124436	0.393382899	0.590944208	0.39863716	0.426608463	0.587336556	0.580677109	0.592677452	0.490874895	0.325190043	0.356565936	0.413213685	0.391369897	0.443132472	0.332919395	0.415068737	0.478541167	0.517929077	0.304438615	0.591173044	0.566914141	0.389277778	0.480742778	0.514141335	0.653452318	0.632060964	0.629787394	0.404119886	0.607604226	0.42204278	0.821801237	0.467835621	0.615726727	0.235864763	0.380342766
0.533375407	0.455851008	0.403993036	0.473015272	0.617176734	0.428003772	0.537503476	0.445583027	0.484239783	0.574543112	0.430638573	0.381341917	0.343536268	0.480783781	0.371745054	0.392832554	0.371771416	0.597617625	0.408207274	0.473443974	0.573201274	0.655285783	0.633499973	0.426964357	0.279853877	0.403253332	0.457011366	0.45724453	0.40755124	0.303097133	0.378887736	0.444348319	0.471723346	0.277273436	0.522619813	0.536297899	0.393422818	0.44626647	0.480290856	0.67312473	0.711116388	0.681134453	0.505452348	0.740659337	0.539684208	0.767897854	0.515574296	0.676529383	0.285388844	0.408506981
0.529296007	0.477050947	0.403400828	0.542938046	0.642537903	0.512769104	0.638076971	0.512552065	0.464355865	0.577454809	0.499553502	0.4278916	0.405435574	0.455227464	0.3896049	0.365907338	0.343483891	0.565852148	0.406170332	0.528472858	0.530008156	0.703979401	0.641587507	0.404459567	0.268102737	0.461325523	0.501349337	0.533990088	0.373465584	0.299968785	0.364832597	0.443676299	0.461408778	0.295556466	0.478943338	0.525405266	0.406403324	0.407832031	0.44532036	0.676162225	0.764276397	0.747992608	0.666976342	0.87663387	0.686867777	0.682001872	0.551694445	0.716094668	0.3549272	0.430150218
0.53326861	0.525348761	0.411850055	0.670180016	0.709625218	0.643637963	0.762777819	0.618861246	0.428327807	0.567923018	0.584518002	0.489312237	0.479574533	0.403944931	0.382076762	0.338332372	0.310191169	0.509684874	0.389894744	0.573598644	0.4697501	0.700239326	0.613930754	0.4180703	0.272560356	0.51508072	0.544249053	0.6035403	0.368779182	0.34092132	0.396516978	0.473761713	0.493236504	0.331508789	0.480275858	0.538447139	0.422068181	0.379949579	0.425558951	0.681649225	0.784702006	0.815523421	0.841119516	0.973821578	0.808398996	0.607952362	0.567084506	0.724342248	0.431316277	0.446417377
0.564376545	0.591923892	0.413940852	0.823566011	0.814163172	0.778846336	0.875162644	0.736904534	0.384311919	0.557659461	0.66385403	0.55443399	0.542726003	0.350873447	0.35419499	0.314164619	0.274155241	0.450048522	0.360432714	0.591565724	0.408293811	0.634843835	0.557942459	0.441760156	0.269059136	0.554393162	0.580009919	0.653892448	0.417968937	0.421785877	0.473089628	0.50902482	0.542125378	0.35033598	0.526914675	0.56153912	0.434890171	0.374599951	0.436858507	0.695591777	0.768689993	0.860129445	0.965089835	1	0.853443244	0.576485684	0.562411969	0.699350678	0.502068565	0.458697197
0.63411993	0.666736507	0.405744339	0.950085668	0.925416814	0.866443062	0.943735912	0.830847537	0.348467759	0.565706619	0.718630085	0.606609049	0.570159647	0.333208375	0.323800457	0.300965965	0.241165618	0.401911758	0.324401472	0.577207171	0.363518932	0.540780761	0.4909996	0.447017366	0.24505174	0.573846765	0.601863779	0.672087759	0.52818406	0.531778192	0.588852938	0.538432501	0.594151964	0.332728945	0.594304028	0.585135381	0.442577289	0.397214049	0.486677906	0.709168537	0.717831212	0.860625748	0.991133066	0.948142497	0.804499798	0.591254175	0.542776618	0.649524964	0.554798296	0.468157472
0.735131613	0.740457493	0.398026537	1	0.999314085	0.869948683	0.949835457	0.87241933	0.337993334	0.607107922	0.741301869	0.629611464	0.561304287	0.37760824	0.314448049	0.308897453	0.22133425	0.380603291	0.292690785	0.542301962	0.352761695	0.444986615	0.434622239	0.421020936	0.208073153	0.575025436	0.606547742	0.65096321	0.680545336	0.646973914	0.722583997	0.558416258	0.637285667	0.286019487	0.670663677	0.602523054	0.450960192	0.446327297	0.57328393	0.707586619	0.640352277	0.809401319	0.909458587	0.83908842	0.685073458	0.630175794	0.514171349	0.590584644	0.579635947	0.475111989
0.838960106	0.80280635	0.407141919	0.952193854	1	0.78653684	0.894919409	0.852208864	0.36159454	0.680994823	0.736542912	0.622472343	0.532946163	0.484366174	0.344407734	0.346677598	0.225866787	0.391000562	0.275990009	0.510468815	0.388739741	0.38476245	0.405033738	0.373565076	0.179471505	0.565439363	0.597951689	0.595272717	0.837660554	0.739401306	0.838568538	0.576895236	0.664618106	0.23798098	0.742841084	0.61111649	0.471206216	0.515331963	0.691164079	0.682628847	0.550400986	0.717724404	0.751718043	0.709698713	0.545404502	0.659811057	0.481115127	0.538688913	0.571464238	0.47880546
0.906548188	0.840962299	0.440666813	0.825614183	0.918277927	0.64808167	0.79893043	0.781548095	0.413493991	0.76632938	0.714851831	0.590962363	0.507825549	0.620054451	0.417169218	0.415830082	0.260866323	0.422318866	0.279373431	0.504788302	0.474456389	0.38316735	0.404988238	0.329092772	0.178533794	0.554875992	0.587085091	0.52326627	0.954844494	0.788954644	0.905275078	0.607015011	0.679719873	0.218132844	0.802262685	0.616924978	0.511661632	0.59640689	0.818116639	0.639698025	0.464891527	0.612268685	0.573980802	0.593714174	0.434720157	0.653715022	0.446733935	0.503538585	0.53251391	0.478214541
0.907149855	0.84187006	0.488557037	0.670189244	0.776998407	0.504901821	0.691117095	0.685227684	0.475034704	0.829438755	0.684212638	0.544688096	0.501137942	0.743006156	0.518373036	0.506498147	0.321877071	0.459890427	0.299153666	0.535397691	0.59919864	0.4322625	0.422144251	0.309673167	0.208128817	0.551292864	0.587536646	0.461714817	1	0.788691395	0.906285125	0.653422301	0.690040725	0.238695787	0.844068544	0.629353189	0.569783109	0.677355466	0.92638026	0.59429612	0.398654882	0.524279738	0.429346657	0.506835142	0.377197147	0.604884109	0.414601385	0.485510116	0.474402051	0.473705841
0.835399303	0.798776014	0.526652484	0.542099665	0.620668222	0.401370535	0.598261274	0.589752845	0.523142273	0.84022906	0.645833531	0.494078948	0.513093436	0.811152867	0.620888967	0.598087303	0.393205575	0.496482874	0.324156087	0.594245267	0.738390498	0.482578018	0.436023485	0.320213149	0.25144061	0.558285516	0.608325133	0.435725407	0.967048854	0.744582749	0.845477651	0.704066953	0.699827139	0.286849367	0.863342956	0.653551428	0.629865028	0.744139047	0.991270053	0.560580667	0.35959527	0.476411308	0.345286878	0.444685593	0.36557328	0.52714899	0.39032348	0.478482429	0.41730962	0.468389062
0.716244159	0.717983266	0.530644676	0.476944291	0.495119695	0.35652058	0.53592862	0.51334425	0.540666295	0.788190278	0.596537188	0.448254583	0.531160618	0.805075597	0.695585779	0.665701796	0.45351028	0.523274855	0.341050121	0.659680121	0.858951281	0.507172638	0.430358203	0.345306626	0.281694291	0.57485457	0.647910596	0.457712085	0.877337868	0.6711793	0.744422154	0.734310319	0.707515213	0.332446784	0.854972393	0.686412876	0.669001442	0.783296187	1	0.540555546	0.345950776	0.473447823	0.317053735	0.398941239	0.374436186	0.446998231	0.381027624	0.476388262	0.384403606	0.467661882
0.593941633	0.620189779	0.491285498	0.47518232	0.427595826	0.359361526	0.506029866	0.461993934	0.522744959	0.688818567	0.535349665	0.413852735	0.539408807	0.734479112	0.722504232	0.68991604	0.485186769	0.537862703	0.340941696	0.707612901	0.929235029	0.4915182	0.403708993	0.359337436	0.278272085	0.596674653	0.692910269	0.520835849	0.768443221	0.585992124	0.633082888	0.721614617	0.70853125	0.345826498	0.817704386	0.718675813	0.668529478	0.785699473	0.956692671	0.522342531	0.3473112	0.501373549	0.318730392	0.358828313	0.382541564	0.3916531	0.392429321	0.478945778	0.392246036	0.476324598
0.51055868	0.533529682	0.420676052	0.506904687	0.419314657	0.380097265	0.50029544	0.432049685	0.476242241	0.57638552	0.468824447	0.394408653	0.528459604	0.629929195	0.697200564	0.664998156	0.482311505	0.542977241	0.323615476	0.72242871	0.929935231	0.446341061	0.371472123	0.355338466	0.249168269	0.617432687	0.722722429	0.600429273	0.676219014	0.504872096	0.537820806	0.661408356	0.700235228	0.322243961	0.758727161	0.740969308	0.624408353	0.750156772	0.880623127	0.489706692	0.349685503	0.535353203	0.323655255	0.335647226	0.388287465	0.379276568	0.424970106	0.49229215	0.441304096	0.494404799
0.485753302	0.480952871	0.349764864	0.531969439	0.448927279	0.389791162	0.506488506	0.416349216	0.416191832	0.486890357	0.4106783	0.390007057	0.500075421	0.52556777	0.629840481	0.601019636	0.452364896	0.542622563	0.29838531	0.701748624	0.861179116	0.406481738	0.357140403	0.330153859	0.206279684	0.629438851	0.718079181	0.663198592	0.619133319	0.439136655	0.471987643	0.575094355	0.684439026	0.274853718	0.693850433	0.74888119	0.550164276	0.684684526	0.79773744	0.436764136	0.34296668	0.55290576	0.321597115	0.353677727	0.407907448	0.414145411	0.47145004	0.523435008	0.51223957	0.514312133
0.509034917	0.468996694	0.300117062	0.523321669	0.487473277	0.378216541	0.513751195	0.409672593	0.363220452	0.440694319	0.375533647	0.39734595	0.464466103	0.443311729	0.538499553	0.518452068	0.410600789	0.538337602	0.275698147	0.653589408	0.742338803	0.407557615	0.377296698	0.295814233	0.16910797	0.624004625	0.669364057	0.680246738	0.592325659	0.394001673	0.433815129	0.495674663	0.66530938	0.223731052	0.641253513	0.743244697	0.475238122	0.60409064	0.729061527	0.377345577	0.327439714	0.545859989	0.323169074	0.433727597	0.458241689	0.486361147	0.518009212	0.571734751	0.571668768	0.521905146
0.548444551	0.484970496	0.282930439	0.487117167	0.513707804	0.355166309	0.515184781	0.410586798	0.322630335	0.43433007	0.370881501	0.410555763	0.433024186	0.394330473	0.44084579	0.43810631	0.370539242	0.527885593	0.264667825	0.589289647	0.604390898	0.462325931	0.429186907	0.271841919	0.156877635	0.592866756	0.580634147	0.638131085	0.573509948	0.367847557	0.415621581	0.454505575	0.64455117	0.195472544	0.611750457	0.725918488	0.420476295	0.524477758	0.681717901	0.341210554	0.315590672	0.524949978	0.350134463	0.569572517	0.536852702	0.574477402	0.548566869	0.623296825	0.586104299	0.502122685
0.570050856	0.5047173	0.290957133	0.438433889	0.522878615	0.345219298	0.508059231	0.419502362	0.295467464	0.447633304	0.39273255	0.422859967	0.411492819	0.368449389	0.36277416	0.377293124	0.336597718	0.507220632	0.267508608	0.519625027	0.48313507	0.550403208	0.488854298	0.27467044	0.17344732	0.531393727	0.481964181	0.543192124	0.537281245	0.352988328	0.403699834	0.461697097	0.618332506	0.204986836	0.601881668	0.695195108	0.394950195	0.459790887	0.647380448	0.357766708	0.327106814	0.514247223	0.418429896	0.734314361	0.614502469	0.650275978	0.550913686	0.653224578	0.537646768	0.454827094
0.560076011	0.509464685	0.306366411	0.409289162	0.523560492	0.370127758	0.493237229	0.435168504	0.281532574	0.460932716	0.427902931	0.428630887	0.397491807	0.352436477	0.306750755	0.34014844	0.305485798	0.475205158	0.279200004	0.460500415	0.399329204	0.63082366	0.521902572	0.291031565	0.197649583	0.4560669	0.39471106	0.438805871	0.489484797	0.345672025	0.390163963	0.500765178	0.585225827	0.240576328	0.595157399	0.658111294	0.394354185	0.417656343	0.609231298	0.436664497	0.378290094	0.537665331	0.524349103	0.874428941	0.647047173	0.68594634	0.521645329	0.643463408	0.437035015	0.394270701
0.527329725	0.496842027	0.309740721	0.421465004	0.530213028	0.434291572	0.475617975	0.452545909	0.279501283	0.459167819	0.461323894	0.425023798	0.383097708	0.339087506	0.270882383	0.319159157	0.277644887	0.44018417	0.289615085	0.412552204	0.354996254	0.664061457	0.511230346	0.307720842	0.217881888	0.379676402	0.331187671	0.346548728	0.429821721	0.336674532	0.377482011	0.537255562	0.547580429	0.282384371	0.580532622	0.616254562	0.404855356	0.393673801	0.560665142	0.557669637	0.470615829	0.604125651	0.641843041	0.937537906	0.611641231	0.663257564	0.475214013	0.601890315	0.326008199	0.332213442
0.489806331	0.472767956	0.302372358	0.474347983	0.552658555	0.518899664	0.461369407	0.463801731	0.283457571	0.441232714	0.483411539	0.4124845	0.369174896	0.329976574	0.252554572	0.305579532	0.247808306	0.407823787	0.292613674	0.377336281	0.341828914	0.634995251	0.465432686	0.316310796	0.228815554	0.314648278	0.296834351	0.283483826	0.370428102	0.320494009	0.37659018	0.544353699	0.505984166	0.317669976	0.552823831	0.569801701	0.407106548	0.380359386	0.50524525	0.677195326	0.584751243	0.699288695	0.732282767	0.897426217	0.525753994	0.58961482	0.427005403	0.53441024	0.232373384	0.285498192
0.471361045	0.45128106	0.292642938	0.541237955	0.590361169	0.592733109	0.458318508	0.461980911	0.294444433	0.418317261	0.492723842	0.397869216	0.35247187	0.323641957	0.250567692	0.295649407	0.218495077	0.389027444	0.288941194	0.358724327	0.347066494	0.559901401	0.398962251	0.311475695	0.230322068	0.279961171	0.294243944	0.256779399	0.329168657	0.298779665	0.390375306	0.521728666	0.469889021	0.336280678	0.513730716	0.527334121	0.396782951	0.37180224	0.450073043	0.748747925	0.684561563	0.788986295	0.761300893	0.767401759	0.413603815	0.495829133	0.389077205	0.46279377	0.177386841	0.27077196
0.481599697	0.444450647	0.291408764	0.602751857	0.63306087	0.623690234	0.471385441	0.448822697	0.309139296	0.410508131	0.49267166	0.384547159	0.334045476	0.325007544	0.250508616	0.28723339	0.200708651	0.391126879	0.280303856	0.361220901	0.35480595	0.480711746	0.338736645	0.29518367	0.230516148	0.29052421	0.30924238	0.265010647	0.325538015	0.284582132	0.415899021	0.480462346	0.45964497	0.338502493	0.476894614	0.509473268	0.382676309	0.365972532	0.416628226	0.745757162	0.730821198	0.83366838	0.714038726	0.596235847	0.324188191	0.406943446	0.369860709	0.416546573	0.167702621	0.286046869
0.508281932	0.451559784	0.301721879	0.636889919	0.666094785	0.5948168	0.498341266	0.428822852	0.322483983	0.426604434	0.485375085	0.375270135	0.318213022	0.336302188	0.255059069	0.284058788	0.205287642	0.411003426	0.270983378	0.374252432	0.35886101	0.42530096	0.310667063	0.281691486	0.237834819	0.33220004	0.339786193	0.279426218	0.355020156	0.294453219	0.441092771	0.447578404	0.481836546	0.333359556	0.460836236	0.523750561	0.382118135	0.366992914	0.424576207	0.673572533	0.698838654	0.807170999	0.601551683	0.446555998	0.31109395	0.350943947	0.371080897	0.425090024	0.187727763	0.311769646
0.530218379	0.459223564	0.315345209	0.63573008	0.67686738	0.522855506	0.52734339	0.408869264	0.332040499	0.468469017	0.467765894	0.37141399	0.310291145	0.352772053	0.26372786	0.290839088	0.224681648	0.431447402	0.265334186	0.392993402	0.36131298	0.404706744	0.317356314	0.285619691	0.253736481	0.387837696	0.389262003	0.297713992	0.413869369	0.339443896	0.451234737	0.446229209	0.525257177	0.330847534	0.474070114	0.56760294	0.408318772	0.384011131	0.471170775	0.564011834	0.596995975	0.718063053	0.475856573	0.351607593	0.380816301	0.34665378	0.379951698	0.477881221	0.204289555	0.334130166
0.537495578	0.458765778	0.321998585	0.606125568	0.659446657	0.437055212	0.542516105	0.399494228	0.339734759	0.530372037	0.445799997	0.372852861	0.308582696	0.371590904	0.274015131	0.30456426	0.248273688	0.443062656	0.265333191	0.409127348	0.363531495	0.409406443	0.344538088	0.3052592	0.270878865	0.438920935	0.457435201	0.320741921	0.489564601	0.417299896	0.43768709	0.479321258	0.572761273	0.335088877	0.506116427	0.627560026	0.463875723	0.421161366	0.537937647	0.458192016	0.471932548	0.606393041	0.366193575	0.320784963	0.48853702	0.37945851	0.386093606	0.556164848	0.212270826	0.342497319
0.529185678	0.4495591	0.315456157	0.56183403	0.616122628	0.362083414	0.537065017	0.406282233	0.353551659	0.603297307	0.417058049	0.374417233	0.317679599	0.396075669	0.284157374	0.317075364	0.262570848	0.440766254	0.266994992	0.417060756	0.364627061	0.419113209	0.375005215	0.330952392	0.277511272	0.463994759	0.533418324	0.351921897	0.566312526	0.511797692	0.409288438	0.521232433	0.601862515	0.342094223	0.542061381	0.680559781	0.540176436	0.475306597	0.606129788	0.386088446	0.357154922	0.504289745	0.295667446	0.337098614	0.593255114	0.411284984	0.384547289	0.629166788	0.218770823	0.33476501
0.519184483	0.44495841	0.296714808	0.515875453	0.556392899	0.318138223	0.512152614	0.422717911	0.38065858	0.671504577	0.382776487	0.374811696	0.339439273	0.43370685	0.295492438	0.32149348	0.262215085	0.421984424	0.268945159	0.416295432	0.362139142	0.412333097	0.393311087	0.348735693	0.26469539	0.451442382	0.59801609	0.392538558	0.625344868	0.594993275	0.39046625	0.550887713	0.594513774	0.342618201	0.567216981	0.70155427	0.619317686	0.535517669	0.651561361	0.350943885	0.283164786	0.440893282	0.273354981	0.363394641	0.653821699	0.422933472	0.374130307	0.670484486	0.237943123	0.322416658
0.526342177	0.461885053	0.280415852	0.476509215	0.4943436	0.313680697	0.474487376	0.438616272	0.419032367	0.721798625	0.351640734	0.372863651	0.372492364	0.487528856	0.311213767	0.31711299	0.243187906	0.394717128	0.269996308	0.416182623	0.354391383	0.394738066	0.394197505	0.348248847	0.239539356	0.408616363	0.630460576	0.440060592	0.647384533	0.634392481	0.408499456	0.552733966	0.558538396	0.327786263	0.575394349	0.679439859	0.679958627	0.585259196	0.65994727	0.339812565	0.271608251	0.429044544	0.297696056	0.367855798	0.646722445	0.40796177	0.366158517	0.659292948	0.284471418	0.327741877
0.561016874	0.509784612	0.283378891	0.447581551	0.444202089	0.334909544	0.441318401	0.448085887	0.453912108	0.744707025	0.342325175	0.368067258	0.412671364	0.555071527	0.336679017	0.312147115	0.214740523	0.376127808	0.269486085	0.430673798	0.342652763	0.387196282	0.383376718	0.332439229	0.209011794	0.357711293	0.616551435	0.487772018	0.632070254	0.618608333	0.476346524	0.528072793	0.507368906	0.299050668	0.56657489	0.628018819	0.709019046	0.611339937	0.634009687	0.335785426	0.30949178	0.457270117	0.327342066	0.355468653	0.589772966	0.379322723	0.376487576	0.607557333	0.362597944	0.371077593
0.616796985	0.583240119	0.307684084	0.430786249	0.418544351	0.358593989	0.435822395	0.446769447	0.463109103	0.734588716	0.35748528	0.365037231	0.451640995	0.621586735	0.375358658	0.321335968	0.1992946	0.380196067	0.267226484	0.468991727	0.331299181	0.404496168	0.366832268	0.308616176	0.181779615	0.324415694	0.556377897	0.525767524	0.588761888	0.5582422	0.581155619	0.494818818	0.468151068	0.264440677	0.555546977	0.573662816	0.704304756	0.608173574	0.589080877	0.328607474	0.354479846	0.487028746	0.348113031	0.34548705	0.52967525	0.373820963	0.419019484	0.554212304	0.460301325	0.457943728
0.672637082	0.661775632	0.34051872	0.426809124	0.421842253	0.372438363	0.460756476	0.432411609	0.437213849	0.691081593	0.397274933	0.370748982	0.482513175	0.664507195	0.425683926	0.356658026	0.211977158	0.404199982	0.26339952	0.528597967	0.325574563	0.443694294	0.357140403	0.288713983	0.165264594	0.32520899	0.467877731	0.544648268	0.531548363	0.479835256	0.686299814	0.474512972	0.465950482	0.230567404	0.555742859	0.54274223	0.671807153	0.578467174	0.543047041	0.328584936	0.390149032	0.502538179	0.352614132	0.361346863	0.514536245	0.428061975	0.498806653	0.541047347	0.553356941	0.573040326
0.704015957	0.716619992	0.364358244	0.434362919	0.448707216	0.371345161	0.50272986	0.409923212	0.385276705	0.621493374	0.452554489	0.392539173	0.503776159	0.664674613	0.480860765	0.418984551	0.246548068	0.437974961	0.258644353	0.594998942	0.333404841	0.48497894	0.358723108	0.28251877	0.164482273	0.359752746	0.381825405	0.539857695	0.474046515	0.412169552	0.747396177	0.477977859	0.50336856	0.205558829	0.56891789	0.545505494	0.620841155	0.530772985	0.507019131	0.349408479	0.410764028	0.500881124	0.344103277	0.42114276	0.567202696	0.551304936	0.608100833	0.590481696	0.616454193	0.684530931
0.696239721	0.729842128	0.363619239	0.448737128	0.485040607	0.35988447	0.543302691	0.390259863	0.320248672	0.541672977	0.509283763	0.435010027	0.519430641	0.617850335	0.531752602	0.496035969	0.289841984	0.465271485	0.257056432	0.648584249	0.357593687	0.504579493	0.367030636	0.289660178	0.172195742	0.411917305	0.325275929	0.514168134	0.42595968	0.372505984	0.734438915	0.499149812	0.556497001	0.199939599	0.583660739	0.572292151	0.56062368	0.47583906	0.482010813	0.394122751	0.414934104	0.492718764	0.329906118	0.521374009	0.673736561	0.716229468	0.720169922	0.693464646	0.634421534	0.756699415
0.652007368	0.704514985	0.341437407	0.462361237	0.514053865	0.347556835	0.563515029	0.387008817	0.269825576	0.472852383	0.5511344	0.497006569	0.535580769	0.539137377	0.570891655	0.568036735	0.325616126	0.471832007	0.263354363	0.674219073	0.391784149	0.487829535	0.374322641	0.298989641	0.185825699	0.458318201	0.315706236	0.476804657	0.392212426	0.360275953	0.647966547	0.520658943	0.606312655	0.213238991	0.583862262	0.601102131	0.49974696	0.427695081	0.46502872	0.451410431	0.413450296	0.489344203	0.328896045	0.637013703	0.792005265	0.867915897	0.802820913	0.813551115	0.607159898	0.764850019
0.589185157	0.662350512	0.307329107	0.468228054	0.521417299	0.351884241	0.552148784	0.405872131	0.264558787	0.43433007	0.571446287	0.566531584	0.554977776	0.456856046	0.594975233	0.617546044	0.340229671	0.453874181	0.28087615	0.667732256	0.428958787	0.444677936	0.376917125	0.306325401	0.20314302	0.47948276	0.350381879	0.439494175	0.372296135	0.36122684	0.532877214	0.526649675	0.635019168	0.238109736	0.561419026	0.61679346	0.447154993	0.39138573	0.450519826	0.502374172	0.415572495	0.504153659	0.35524188	0.732959489	0.874073719	0.947319989	0.831021732	0.904587663	0.546410953	0.705402934
0.531860359	0.630018499	0.280783515	0.464214903	0.504004197	0.384072266	0.519004064	0.447505331	0.305945408	0.435089043	0.576374703	0.625559035	0.572913711	0.39878455	0.604349141	0.637317367	0.335465886	0.425183047	0.309801765	0.635767491	0.465805971	0.406464718	0.378246384	0.312939784	0.220691329	0.467926409	0.406533706	0.411363764	0.367479603	0.358762678	0.426937968	0.513647855	0.636386494	0.268022311	0.524351774	0.617741917	0.411936403	0.368996161	0.438253695	0.523657258	0.420633882	0.535963054	0.409461756	0.779873693	0.889335825	0.92369147	0.79748672	0.932488497	0.467727988	0.596798476
0.495442224	0.622681151	0.277756641	0.454817085	0.470762705	0.441532024	0.489053823	0.503975821	0.367282483	0.469085138	0.578393924	0.656118431	0.577773689	0.378489614	0.600196807	0.631466582	0.327129989	0.409073565	0.346215462	0.590007459	0.49864462	0.405545489	0.385592811	0.32372457	0.232088041	0.429683911	0.451427547	0.395218604	0.376230594	0.34505788	0.367734636	0.49203824	0.620950658	0.294156434	0.494297434	0.616474684	0.400467523	0.364409276	0.434761464	0.514041822	0.419544186	0.569380089	0.476506818	0.766018279	0.836399986	0.811031247	0.71597839	0.889961605	0.383458252	0.473264393
0.483524984	0.635143832	0.29567503	0.448135034	0.437925569	0.507192977	0.486489815	0.561717061	0.421426492	0.517523613	0.586622952	0.647525447	0.557028667	0.389626199	0.581881458	0.609766908	0.332759791	0.423685176	0.38002013	0.540339763	0.526099864	0.452069874	0.403293313	0.343528211	0.2309628	0.38125187	0.461906214	0.387010383	0.395550008	0.325029029	0.369427683	0.477518981	0.606801998	0.305000993	0.494237827	0.628358068	0.412177059	0.378859409	0.446167681	0.49152592	0.405047408	0.586134121	0.532425826	0.699990702	0.739177591	0.660646712	0.6153407	0.797362995	0.308182356	0.371112829
0.48825819	0.646160576	0.314939252	0.449470232	0.420287822	0.556427408	0.518170266	0.601310688	0.440946981	0.557574525	0.600173708	0.601357636	0.505783277	0.411393659	0.546854735	0.579495613	0.357766645	0.469377381	0.400137183	0.491663643	0.54903716	0.523939998	0.42793172	0.371234382	0.219314274	0.339572174	0.434902493	0.378663703	0.419880868	0.311086219	0.415904854	0.478949727	0.606715092	0.295612284	0.533875225	0.658123436	0.437249653	0.402184837	0.469308741	0.48122184	0.382806529	0.579616796	0.556650226	0.604684673	0.631546851	0.533909732	0.526844318	0.690446811	0.247922113	0.308623426
0.497680112	0.632987379	0.325019101	0.45601262	0.423402215	0.568622958	0.567048324	0.611039601	0.415936781	0.573054577	0.608514806	0.531355664	0.436452795	0.421671243	0.493665875	0.540804711	0.389633429	0.526291714	0.399120004	0.44636355	0.56256595	0.58198845	0.449619889	0.396953153	0.200571915	0.313129984	0.386548795	0.362729651	0.442783665	0.312664113	0.459890483	0.491438899	0.61995697	0.271734334	0.601957865	0.694254912	0.459157955	0.42647496	0.495196248	0.497505824	0.373978418	0.562310359	0.543510299	0.506952706	0.540282075	0.470840281	0.470906043	0.602370075	0.203686398	0.291923961
0.502518089	0.587112583	0.317178725	0.460983132	0.441393822	0.537829014	0.600560502	0.590555686	0.363718859	0.561223071	0.59827352	0.459768568	0.369035247	0.409840162	0.426112151	0.488977519	0.404725208	0.564345837	0.376407139	0.408687498	0.557368029	0.593930586	0.458900574	0.405987039	0.180875651	0.304923764	0.335321747	0.34028453	0.45346839	0.327952642	0.479423082	0.499705936	0.633600786	0.2447251	0.670788681	0.715792994	0.4620084	0.442994563	0.51049733	0.532873405	0.405232487	0.560086059	0.506354989	0.428305489	0.475255045	0.47226409	0.449663103	0.54949061	0.179363334	0.311159483
0.503172805	0.527105005	0.29394584	0.457366627	0.461825485	0.47692666	0.593925111	0.549360072	0.307731859	0.532030676	0.561964949	0.40581504	0.323714021	0.381704576	0.355622401	0.425763843	0.383873501	0.560340818	0.339067017	0.383075071	0.526392251	0.556834854	0.454362026	0.389577037	0.168522827	0.310921542	0.302948635	0.315520342	0.446178038	0.34378349	0.465560127	0.497195808	0.631812311	0.22359543	0.710651099	0.707233422	0.446960851	0.44232949	0.504254059	0.561970282	0.49094025	0.595956528	0.471181452	0.379875441	0.432467913	0.504812866	0.448860309	0.527523477	0.181452299	0.344856094
0.504221011	0.470947988	0.270925015	0.439614292	0.474583429	0.412681736	0.551622581	0.501258451	0.27609197	0.500637414	0.503260638	0.376321915	0.314449638	0.353947014	0.297902429	0.361849922	0.330965633	0.515578172	0.30190156	0.376302175	0.47254062	0.501535795	0.445010081	0.356733028	0.169591325	0.321395621	0.303286126	0.293407867	0.422344209	0.348995611	0.431623218	0.479316295	0.606561679	0.214175895	0.705700737	0.67106439	0.417310267	0.422693259	0.481513817	0.558987238	0.618687645	0.673233835	0.462407424	0.361846879	0.404688556	0.524322287	0.447608012	0.518593569	0.200265574	0.369220976
0.509923021	0.441524483	0.266764327	0.412632022	0.478955578	0.373567645	0.4857963	0.459383229	0.281354262	0.477987529	0.441708588	0.368555602	0.33730312	0.342040911	0.266295997	0.307542049	0.265839927	0.45249929	0.273628907	0.389545395	0.411376334	0.47370213	0.444766233	0.316877829	0.178574683	0.327944638	0.326759084	0.280573096	0.392027268	0.336999875	0.395918182	0.453857914	0.5647755	0.216414669	0.661911509	0.628512184	0.388423898	0.395212445	0.450021178	0.516946669	0.748689877	0.769233721	0.488233102	0.365720553	0.38093989	0.503990466	0.435820019	0.510887132	0.222580211	0.374008354
0.519463169	0.447001023	0.28412956	0.403254829	0.483947154	0.376113371	0.434267791	0.430733489	0.30779005	0.46520795	0.390411566	0.37265972	0.36785727	0.349487752	0.265163917	0.282757322	0.218083714	0.400178805	0.260942561	0.413427423	0.365503935	0.503452057	0.46204991	0.28520973	0.188966421	0.32994614	0.350940124	0.282052188	0.371122383	0.311818231	0.377646177	0.440401726	0.523247628	0.222778366	0.602521713	0.606846165	0.381683935	0.378154546	0.429616097	0.45521105	0.829874124	0.844593305	0.53399863	0.377858989	0.357688868	0.454076089	0.41209494	0.494106474	0.236559486	0.358454957
0.52637113	0.475836306	0.31289381	0.429093108	0.501140244	0.416622659	0.436439272	0.413406555	0.32716912	0.458894653	0.361978407	0.375515547	0.381389001	0.365277973	0.286029207	0.298033133	0.211677449	0.385596134	0.263336235	0.430058947	0.352761695	0.583147777	0.491428854	0.275526711	0.193834442	0.324281806	0.361890889	0.293986366	0.374865011	0.295926399	0.38175362	0.452215077	0.494163953	0.224920665	0.554031442	0.621008791	0.409793395	0.388944499	0.436908867	0.408808633	0.824940583	0.863572515	0.568097455	0.383834968	0.347271287	0.394399127	0.382615613	0.471374846	0.233970782	0.329086223
0.524731161	0.498313795	0.334197642	0.490585258	0.534493039	0.472662461	0.503846818	0.4045307	0.330883151	0.451187243	0.362389825	0.371307007	0.373044448	0.375655385	0.31053637	0.342214962	0.247096071	0.413864614	0.273241401	0.429195422	0.375179878	0.668546486	0.513796478	0.28718669	0.188922546	0.310762692	0.354910742	0.311745517	0.410492613	0.313077781	0.396371955	0.478035007	0.483211351	0.220943911	0.531408728	0.661919738	0.462178615	0.435334083	0.476389239	0.405435341	0.730297896	0.813536268	0.558187849	0.37963353	0.362478318	0.360423225	0.364935105	0.461176757	0.213356545	0.294687643
0.513865424	0.502229416	0.339808245	0.572248656	0.574069702	0.513863057	0.609198762	0.404871881	0.313212522	0.436873516	0.390001866	0.368586954	0.341189629	0.370326607	0.320585625	0.38827377	0.295737921	0.462250447	0.281905564	0.40745464	0.416308863	0.703816657	0.506419687	0.302842557	0.175766902	0.298881002	0.333316192	0.333967547	0.472857176	0.369178209	0.402375266	0.501016891	0.486665376	0.213072218	0.53134511	0.700136084	0.525977887	0.510224863	0.533506833	0.445090776	0.579986644	0.711887825	0.50263004	0.361533213	0.408085439	0.374296989	0.374168491	0.483563873	0.194139682	0.282931132
0.494698944	0.486641647	0.323656162	0.646110591	0.598852714	0.516809791	0.723934751	0.41830171	0.286136955	0.423568685	0.43339504	0.380320757	0.310398075	0.346613068	0.309031192	0.415086152	0.324508535	0.497828837	0.285516161	0.378746789	0.450016543	0.659425598	0.470272886	0.313187337	0.163585094	0.3039716	0.317285355	0.361432966	0.54557918	0.453567355	0.396604507	0.509687927	0.492742808	0.207558369	0.537174716	0.703710889	0.582136037	0.593144547	0.594679366	0.496789626	0.436350301	0.60040511	0.41872887	0.33889431	0.486695976	0.434613023	0.410900301	0.543326414	0.202273294	0.312978856
0.476941098	0.462230695	0.29265027	0.674542582	0.588328219	0.47687388	0.811106852	0.451117558	0.277413557	0.427465042	0.49123409	0.417831781	0.314376989	0.325137511	0.28507326	0.406344133	0.315076756	0.499880076	0.281159329	0.372874205	0.456637458	0.563548567	0.412206977	0.311450588	0.164169612	0.339882163	0.33177952	0.398099988	0.607523111	0.543649716	0.387670958	0.495631632	0.4903385	0.210594238	0.534000378	0.665451075	0.613165704	0.658101549	0.64136059	0.516390577	0.33606487	0.515384972	0.329944052	0.334032244	0.592751617	0.517052085	0.471071691	0.639858307	0.258812239	0.391189905
0.475573717	0.450920066	0.271421643	0.644427574	0.541397564	0.416186097	0.84812766	0.509920117	0.306612845	0.460011846	0.560382361	0.485353351	0.376232776	0.334970783	0.272168975	0.369295834	0.272778037	0.469493592	0.27066541	0.418476973	0.436974959	0.451010681	0.351709003	0.297473003	0.182560923	0.418443762	0.393984298	0.451329389	0.641541147	0.607611784	0.39514794	0.462327361	0.480114777	0.222867643	0.516877497	0.600091785	0.613926584	0.684257656	0.663317899	0.485690896	0.295804107	0.472174716	0.276847887	0.370922212	0.706387541	0.611002774	0.551713534	0.759647053	0.367743512	0.51399303
0.499410446	0.470407533	0.28256726	0.57277971	0.473033435	0.358999346	0.839414017	0.592370248	0.369653078	0.526090582	0.636480095	0.576287948	0.488332386	0.394058601	0.297369958	0.333814205	0.224439981	0.422011351	0.26013754	0.523000141	0.414890832	0.374669661	0.324539895	0.281215589	0.213433431	0.541497457	0.502080298	0.527702908	0.641250981	0.625450853	0.437351422	0.437154495	0.472438215	0.239115849	0.494510939	0.542106607	0.591561708	0.664396151	0.661379939	0.411289387	0.30217413	0.464827195	0.29123263	0.456753384	0.806172858	0.705415497	0.645277633	0.875965769	0.514124218	0.669720474
0.546704728	0.524616464	0.325635658	0.498601508	0.416278292	0.335506729	0.809076609	0.685319752	0.450984214	0.620317356	0.713211317	0.673135526	0.631893441	0.503029816	0.37739839	0.338174822	0.211079105	0.388753922	0.252296331	0.670984052	0.42547621	0.371161811	0.354025351	0.277597599	0.243967243	0.692244553	0.640879704	0.628090028	0.612783748	0.598375233	0.517510088	0.449143808	0.479054055	0.251219773	0.487343748	0.530844152	0.559215997	0.607337621	0.644208447	0.33459899	0.324722958	0.472704621	0.36455648	0.586812314	0.874369947	0.798156206	0.745693219	0.962025642	0.664591464	0.821296275
0.611128805	0.600216904	0.387525048	0.461378162	0.410138033	0.362609373	0.783786372	0.769002325	0.524379325	0.722541384	0.781574789	0.755498444	0.767594664	0.647499805	0.508430838	0.408442745	0.26040182	0.393737675	0.252785058	0.826342023	0.494575782	0.43038875	0.425185106	0.292061043	0.259448231	0.839988685	0.781733858	0.744375891	0.57121091	0.546770505	0.618459553	0.503984159	0.504947135	0.253569721	0.51194654	0.582888936	0.528078356	0.533581099	0.622060021	0.317819597	0.332559551	0.473487397	0.46930887	0.73262043	0.901725055	0.887270265	0.846071941	1	0.786712856	0.935705924
0.677127038	0.680817512	0.449058323	0.478555894	0.477241148	0.436921415	0.777123344	0.823919438	0.562045876	0.806457069	0.831544194	0.807468212	0.857934542	0.790768665	0.664921608	0.542437847	0.368081585	0.440088947	0.26252377	0.945655383	0.62131215	0.493394823	0.513230225	0.318879037	0.251520653	0.950974843	0.895531272	0.859595214	0.5340166	0.498458192	0.708014347	0.585826773	0.545447698	0.247575733	0.567305031	0.67560514	0.502735124	0.46674955	0.601799817	0.401874821	0.33815588	0.469573903	0.580776128	0.84947374	0.889768748	0.961588394	0.934377542	0.987148157	0.859391461	0.988544882
0.724900321	0.748844211	0.485588851	0.535661188	0.605772066	0.531667995	0.784697857	0.838030087	0.551339481	0.850140985	0.855286397	0.822426743	0.883685294	0.894091839	0.808316365	0.707204956	0.501620822	0.504963837	0.276582723	1	0.774292062	0.527912971	0.589799287	0.343639799	0.229001156	1	0.962106664	0.951746003	0.514962974	0.474354858	0.753673839	0.667975893	0.58927884	0.236353221	0.636471958	0.769851815	0.482082697	0.425096444	0.585847093	0.570375633	0.368574073	0.483334489	0.668595879	0.897664423	0.849960694	1	0.992255049	0.936844036	0.878140265	0.972484765
0.739866064	0.793886836	0.483130753	0.595460418	0.761387527	0.623117482	0.791566364	0.810669035	0.497652486	0.843368543	0.849977534	0.803625898	0.849244316	0.931901612	0.901581539	0.851815273	0.622066325	0.565914112	0.287433733	0.986209263	0.904559218	0.520195706	0.62615644	0.351690535	0.201250478	0.978874673	0.974399341	1	0.520618836	0.479513956	0.737773713	0.714920463	0.621365203	0.225558416	0.694874089	0.827897979	0.46408904	0.416613795	0.574577253	0.77200233	0.452573648	0.537282442	0.71692825	0.861470377	0.799734969	0.982139141	1	0.873729036	0.851713245	0.90010004
0.717892272	0.812687724	0.443426212	0.620911541	0.895852641	0.684413307	0.785272045	0.751420869	0.425891743	0.790232091	0.818581075	0.761165647	0.776523562	0.900344663	0.922716833	0.929162892	0.697496895	0.603840707	0.292718899	0.923902029	0.96850806	0.488383314	0.617852282	0.341715311	0.179295332	0.89800003	0.936756054	0.991074342	0.549696018	0.503637289	0.665196003	0.708083658	0.632804909	0.219537115	0.719202503	0.829277654	0.45018726	0.438835715	0.569237982	0.936038138	0.597304274	0.638156143	0.732233888	0.758749997	0.756472395	0.904073196	0.946326896	0.824178986	0.793921663	0.799637431
0.666545156	0.805240982	0.387643755	0.597853254	0.965273769	0.69991706	0.764649159	0.674885149	0.360338854	0.706600635	0.768328644	0.707422648	0.692021216	0.81607594	0.871205292	0.915771269	0.72179205	0.617950782	0.287463306	0.841028611	0.947915091	0.476715846	0.585097187	0.316698233	0.169671882	0.78082413	0.859913893	0.923519727	0.593803409	0.529191515	0.563165088	0.655760525	0.624806359	0.217111915	0.701193812	0.783840719	0.445630187	0.481872926	0.572325678	1	0.774669192	0.76693472	0.734966695	0.635105734	0.731370907	0.787521196	0.837502894	0.805369207	0.71673063	0.705096941
0.601719309	0.771340003	0.334379231	0.543163719	0.950662361	0.667805982	0.738277534	0.594294747	0.312191894	0.613791728	0.707978605	0.653015452	0.614678579	0.706714799	0.76512449	0.819987062	0.712747428	0.62288825	0.27323486	0.757519939	0.855840042	0.524107808	0.558500971	0.289918452	0.169960816	0.65443034	0.756358373	0.80850272	0.638344975	0.5411027	0.469528455	0.586903758	0.604356602	0.212035415	0.65021201	0.721557205	0.45525245	0.532068335	0.584593011	0.945309147	0.928547395	0.880954616	0.744950069	0.544189654	0.725545987	0.674122119	0.69947526	0.817490234	0.628674109	0.644309067
0.545076475	0.710637926	0.294816719	0.492978266	0.863398304	0.597192457	0.714376723	0.524130303	0.285455098	0.533041735	0.645313512	0.604418976	0.550518466	0.597987504	0.631282063	0.675354582	0.695454785	0.634799881	0.258302737	0.677245656	0.725572046	0.634487118	0.558519412	0.278183206	0.168820064	0.540965392	0.638461602	0.666892305	0.663741063	0.532093097	0.403890839	0.533215532	0.579549181	0.203624313	0.590395999	0.670501005	0.477594056	0.574420158	0.600782536	0.802140247	1	0.934935322	0.768878272	0.523110053	0.73003556	0.605736918	0.569889142	0.843069697	0.53796555	0.629519234
0.508815389	0.632743092	0.274319118	0.478150217	0.736501167	0.513071125	0.690413497	0.472657336	0.279078711	0.479919434	0.585706568	0.563264386	0.495357848	0.503818836	0.496425789	0.523694233	0.682178173	0.65582691	0.252402867	0.592554087	0.592433253	0.767866546	0.580795922	0.287754651	0.16483625	0.453323343	0.519149072	0.523624837	0.648477285	0.501621686	0.373945909	0.510369001	0.563329698	0.194985352	0.545381973	0.63918802	0.501839585	0.593778778	0.607697227	0.629156775	0.956459708	0.903838005	0.796345772	0.574925496	0.729810803	0.601505107	0.482695208	0.854563824	0.455882093	0.653981058
0.495277957	0.557809819	0.272936309	0.502535833	0.607323445	0.438005723	0.651190532	0.437352458	0.28264121	0.454419429	0.531649769	0.52687623	0.442207631	0.441097319	0.392436251	0.407237709	0.662033937	0.667788365	0.257075316	0.510562114	0.49642436	0.858239714	0.596306293	0.306828454	0.160898457	0.395503382	0.41900219	0.40637761	0.598760491	0.455242587	0.374850848	0.509534804	0.551035204	0.19174521	0.523204433	0.630994231	0.510488507	0.576291523	0.592785334	0.483321026	0.808240637	0.795494803	0.805577903	0.667011249	0.710118158	0.645706379	0.452897507	0.827357226	0.395835389	0.695664478
0.498166256	0.495568152	0.282820887	0.538361855	0.511693464	0.380442542	0.6047584	0.415039603	0.288211096	0.448425676	0.482720391	0.489734709	0.394388922	0.400854174	0.320567976	0.336462217	0.607415316	0.641780608	0.271086246	0.433046679	0.435435557	0.847986207	0.578377782	0.324795234	0.162017762	0.365409835	0.347200022	0.327990543	0.526338172	0.409971732	0.390871429	0.517911798	0.534536967	0.198182548	0.51948004	0.624165617	0.500034896	0.536896616	0.564476625	0.396455142	0.615737302	0.662695708	0.774849212	0.746206081	0.662439515	0.694774506	0.469733347	0.752097196	0.367147874	0.726409044
0.506021051	0.455732569	0.297416702	0.554882952	0.455037891	0.34459478	0.54338821	0.404157869	0.294761491	0.449723373	0.444222184	0.454949071	0.354345723	0.371062511	0.275452507	0.304191086	0.516012786	0.59067782	0.287062797	0.371409108	0.394665289	0.748245366	0.529833806	0.330350896	0.170886574	0.357230993	0.311918878	0.288374222	0.439600825	0.366007414	0.402137186	0.515327823	0.510077911	0.213612189	0.522104592	0.600050245	0.471520919	0.481883921	0.520499342	0.362354107	0.444634813	0.546813825	0.693235461	0.763260211	0.587638883	0.700390947	0.502429473	0.652445824	0.367317968	0.722811175
0.50425448	0.443074286	0.311263687	0.536739161	0.42801302	0.331627614	0.472852204	0.398325241	0.29937682	0.44592078	0.416063573	0.422858337	0.325732654	0.344222467	0.251018059	0.295036177	0.401757392	0.511256632	0.294979101	0.349376726	0.361159592	0.599868592	0.450761183	0.317124587	0.18856949	0.362084071	0.31285231	0.279895436	0.358414747	0.324211345	0.405291395	0.490659453	0.480762935	0.23489715	0.516018348	0.557720695	0.429981505	0.419223884	0.468211659	0.356122034	0.331681534	0.474041698	0.578160841	0.694658914	0.505067169	0.639635289	0.515861168	0.556096921	0.378923584	0.674607246
0.488962038	0.447683651	0.318421028	0.480254558	0.416536402	0.330329329	0.41422801	0.392275924	0.298290438	0.429253372	0.394572964	0.39294751	0.312039323	0.321962855	0.242330457	0.295378113	0.280564084	0.420382054	0.287826433	0.378622672	0.333372641	0.450392634	0.363097261	0.291302133	0.203314821	0.367946107	0.337519449	0.290265788	0.309658619	0.290418809	0.400506319	0.45100996	0.446662162	0.248519201	0.494152479	0.515451233	0.38914964	0.363814632	0.423692876	0.352924416	0.287260201	0.450003676	0.462594341	0.579362519	0.43159942	0.542460609	0.497784622	0.485362007	0.37526834	0.587472465
0.465058981	0.44911884	0.315783228	0.409555728	0.411406249	0.330776136	0.393878191	0.38771641	0.289808378	0.405783772	0.377340708	0.368400009	0.314545423	0.296912967	0.233725159	0.289688632	0.184412111	0.349374559	0.266314911	0.435284203	0.302643975	0.349338509	0.301229403	0.263791045	0.205942701	0.368980214	0.358156373	0.301416798	0.293868957	0.273422122	0.390417376	0.418131542	0.42121683	0.247870315	0.464648429	0.481816023	0.365890536	0.3344533	0.400635703	0.340737281	0.295588385	0.461495907	0.364199738	0.451937035	0.376351826	0.436478321	0.454688557	0.45426962	0.345617716	0.482640017
0.442696064	0.44235923	0.302666108	0.363862873	0.402288541	0.333073447	0.40655851	0.386053423	0.276893929	0.386726658	0.365119648	0.35531507	0.323155752	0.280816263	0.236580049	0.282554334	0.145446891	0.32767644	0.239589378	0.494235276	0.286201448	0.32553532	0.283860735	0.246857337	0.196824807	0.361406804	0.369801169	0.305473584	0.305637102	0.276808651	0.378786412	0.402281644	0.414860945	0.238168308	0.440776678	0.471916836	0.359892425	0.323096842	0.389890044	0.321110516	0.315532466	0.471237859	0.298037881	0.347810418	0.344824625	0.357040358	0.401567671	0.461606171	0.292457058	0.391027814
0.432558876	0.428352733	0.283864901	0.37017327	0.396644116	0.336857148	0.457600469	0.39700919	0.276144605	0.383159246	0.354004046	0.350838318	0.332062537	0.300507639	0.261220005	0.284967994	0.155976056	0.333069653	0.221002457	0.530181477	0.294044864	0.347770952	0.294386887	0.248090067	0.186933263	0.342019292	0.364031888	0.302264346	0.353936461	0.308620341	0.369431232	0.409455461	0.429791953	0.233610178	0.43402115	0.487876803	0.366497777	0.329694476	0.393608218	0.307571204	0.319054318	0.468619691	0.272439177	0.293242128	0.342091324	0.327792349	0.360319054	0.47969677	0.224611429	0.325639534
0.440489773	0.414663003	0.280764332	0.420353518	0.40516853	0.341162225	0.521654609	0.423279691	0.304344784	0.420147135	0.345736858	0.353872984	0.337990219	0.364626072	0.30540687	0.303265224	0.194680176	0.359627009	0.221763677	0.522618147	0.322462212	0.380250754	0.32452157	0.277645925	0.187390157	0.315007405	0.341393825	0.294337943	0.41614818	0.361938435	0.367932154	0.446699087	0.459002677	0.244804107	0.447980879	0.519012418	0.381241239	0.352668529	0.408125916	0.307738626	0.308063441	0.458419058	0.275199456	0.295589473	0.358238985	0.345219367	0.350219734	0.487383623	0.164441923	0.291127194
0.472688576	0.41144601	0.304710555	0.485196364	0.427692553	0.344644876	0.568850349	0.461990791	0.362366199	0.485805229	0.344315698	0.363225631	0.340402989	0.457773404	0.358776124	0.332558438	0.239674805	0.391952363	0.256919026	0.47920794	0.356945685	0.407347453	0.360834363	0.325425625	0.211079274	0.291825595	0.31313772	0.285404945	0.465320741	0.417513948	0.378761601	0.497863382	0.489979004	0.279862181	0.476385631	0.549255931	0.396844343	0.385632033	0.426275781	0.319524033	0.293627692	0.450822229	0.285287137	0.315527389	0.386066921	0.369801733	0.366862098	0.478048463	0.15127551	0.283248143
0.523640951	0.445523242	0.355893173	0.52802971	0.452339831	0.346012596	0.581563622	0.505556978	0.438180156	0.555577983	0.350417839	0.374478673	0.33955514	0.552464927	0.407009259	0.362761216	0.266319995	0.414749269	0.310637297	0.42402971	0.379147786	0.427562525	0.384970825	0.372707813	0.254798952	0.278824771	0.295665345	0.278349183	0.484197328	0.452586139	0.401095992	0.540322567	0.510931655	0.328671345	0.510999018	0.56659536	0.407836322	0.410766509	0.440975704	0.334409557	0.287314715	0.461834457	0.29890694	0.341769886	0.422955891	0.388604062	0.393444324	0.45575673	0.192664249	0.289763089
0.571858613	0.510901507	0.422400877	0.528373582	0.465323375	0.344496401	0.558216166	0.543107344	0.51156773	0.603831799	0.368352503	0.381166949	0.335467897	0.620354965	0.432166248	0.384169927	0.26492713	0.419287276	0.359489675	0.381245479	0.378443153	0.440945318	0.387766017	0.404706076	0.299346152	0.278435841	0.294473987	0.273977875	0.472355393	0.447685665	0.429896315	0.56024257	0.516191494	0.36772772	0.534437218	0.568607495	0.410017822	0.416553444	0.448167614	0.352905196	0.293465703	0.490198206	0.32104442	0.365280837	0.464389061	0.399095657	0.418728649	0.433409844	0.272774327	0.297703369
0.600630945	0.586011218	0.489776377	0.487626506	0.460166719	0.345744455	0.50997026	0.55575327	0.555295298	0.616621678	0.391952356	0.379904166	0.328774776	0.627268719	0.422382265	0.388012019	0.245142003	0.409084381	0.385334713	0.367367041	0.359983884	0.451800815	0.374729973	0.416621421	0.320898753	0.297758316	0.312463382	0.27552537	0.432822929	0.406266724	0.458167593	0.557581818	0.508061546	0.374783476	0.536758661	0.561292614	0.405514688	0.404208111	0.44781766	0.372300029	0.311654402	0.525422068	0.346900924	0.386200947	0.500727585	0.413647616	0.437465187	0.443759676	0.368978551	0.311105015
0.604532036	0.64619449	0.535120447	0.435717506	0.437230938	0.354758903	0.469765972	0.536746396	0.554936635	0.578297665	0.417335459	0.374385344	0.320999006	0.569181938	0.383103837	0.373127831	0.218967876	0.397677958	0.384438041	0.378525723	0.338165709	0.461790741	0.357893696	0.40284607	0.307091678	0.328081488	0.343834271	0.286587059	0.394987104	0.351667407	0.477538883	0.531833517	0.494490855	0.344440203	0.521914411	0.553030491	0.401220708	0.381566479	0.442905159	0.394640412	0.338050286	0.557836288	0.375202113	0.413002424	0.524238203	0.450153365	0.450962997	0.501090418	0.453955063	0.338177989
0.581561844	0.675748679	0.553379069	0.423594515	0.416511924	0.377897462	0.459843957	0.492935703	0.523073784	0.515803587	0.446572192	0.374486744	0.31501984	0.474944911	0.330795577	0.348541769	0.213323224	0.398481034	0.356618802	0.394458621	0.329823351	0.467410707	0.351629019	0.376182044	0.267211979	0.356908711	0.379310687	0.312645104	0.381162088	0.306871349	0.482619902	0.499328356	0.485506442	0.294299137	0.501989798	0.548417005	0.405453591	0.357347146	0.437353136	0.421521243	0.365151063	0.587308198	0.409978917	0.456834033	0.531947232	0.516331543	0.466857658	0.594423319	0.495298409	0.387090351
0.5409509	0.654735668	0.552638749	0.481644539	0.42406372	0.421051976	0.480658536	0.442758518	0.486953569	0.464374292	0.487278955	0.391406762	0.316387072	0.384243112	0.283892617	0.324875214	0.240560666	0.416270884	0.330450723	0.398031696	0.352168456	0.459852471	0.365779673	0.354369328	0.228902731	0.377012923	0.413224407	0.360667343	0.394143041	0.296208684	0.474661632	0.476066124	0.486993161	0.256593374	0.483728347	0.546199071	0.423398835	0.352436984	0.437043738	0.448940201	0.394108425	0.616175343	0.459465542	0.517953591	0.526936184	0.601785787	0.494748216	0.697660541	0.487040921	0.460066716
0.504464622	0.602225068	0.547245082	0.601652377	0.477250887	0.487261037	0.514866432	0.409672593	0.472886278	0.448812644	0.540176541	0.432828011	0.33154473	0.331468439	0.261666014	0.309024482	0.2927587	0.448454027	0.331809228	0.385077261	0.395717735	0.444479598	0.400390526	0.348404405	0.222209351	0.391731734	0.44329356	0.436104061	0.41772345	0.319135482	0.45851873	0.466777148	0.496277755	0.259380864	0.48313151	0.542160487	0.457905874	0.383531278	0.448554981	0.45932771	0.432240572	0.65932324	0.522146532	0.594715335	0.517649717	0.680615348	0.537213067	0.782027046	0.447996432	0.546230648
0.485753302	0.5500819	0.547031006	0.740009143	0.573980175	0.569114938	0.542603208	0.411805652	0.490547974	0.471088623	0.608617281	0.496890628	0.363747184	0.337016345	0.271143057	0.302040524	0.348360416	0.487089074	0.369342556	0.369308638	0.440018777	0.434675962	0.446654162	0.359324175	0.260377955	0.406265433	0.475690349	0.534264619	0.429406232	0.355060081	0.439045966	0.466091071	0.505769782	0.308559629	0.503283168	0.534155037	0.504456963	0.437322063	0.470851056	0.445442137	0.481100146	0.725409805	0.600522047	0.675072783	0.514930376	0.721976353	0.586627466	0.811287616	0.409905692	0.628227969
0.486544845	0.524502356	0.549939297	0.843056453	0.693133668	0.65527268	0.557089073	0.452703247	0.526842612	0.511178444	0.68527438	0.570381279	0.411419654	0.38873665	0.30775682	0.300965965	0.390522614	0.52383734	0.43043571	0.374843033	0.470289501	0.447289547	0.497527588	0.380648202	0.329713127	0.436609298	0.519809401	0.640922692	0.417100951	0.378694446	0.419068216	0.465615837	0.508438662	0.382277003	0.531874346	0.531411704	0.552675316	0.492497254	0.500866313	0.409834638	0.532820215	0.805584293	0.685204151	0.740988615	0.527563566	0.708008375	0.628853108	0.778717917	0.400213197	0.686078567
0.49923083	0.534350558	0.543324393	0.872024363	0.797885786	0.729641478	0.569769919	0.518333196	0.553524963	0.540378434	0.752652669	0.633484959	0.466888895	0.454719645	0.358460626	0.302903972	0.407549313	0.555965622	0.489586631	0.416996223	0.483861782	0.492635787	0.545692141	0.404047791	0.395698593	0.491958427	0.579075669	0.733494241	0.385295923	0.383679391	0.40055839	0.461619317	0.501563649	0.442093046	0.55569297	0.550335832	0.590116439	0.530454038	0.534461752	0.367716166	0.576656234	0.874160905	0.75522412	0.775987901	0.558018846	0.644993428	0.650953744	0.706449011	0.428371635	0.705561354
0.513218555	0.569542013	0.513446774	0.826125547	0.856404907	0.775860568	0.601454661	0.58273354	0.544392007	0.539015765	0.790119684	0.667727885	0.517914106	0.502725909	0.410213852	0.308328593	0.40788303	0.586250028	0.523655514	0.492740125	0.485086945	0.565689889	0.592333093	0.424430663	0.422422599	0.565939653	0.645362883	0.787617995	0.363410505	0.373069323	0.388020965	0.458300549	0.490019297	0.454811003	0.571347418	0.596204538	0.607052796	0.537437638	0.564424806	0.341210554	0.597081594	0.901317549	0.785661515	0.772126345	0.600295551	0.560618396	0.647773291	0.626870879	0.482197916	0.68453813
0.521003792	0.60921636	0.456912876	0.737898313	0.85354528	0.782788547	0.665423793	0.620117563	0.491755701	0.507980884	0.783840047	0.663292893	0.553925917	0.514535169	0.449220613	0.321279451	0.408563791	0.617074382	0.524514238	0.584553894	0.49804679	0.645236263	0.639570023	0.44154791	0.393620469	0.637508052	0.700625257	0.786924914	0.379347988	0.370633864	0.390805279	0.464908637	0.486079811	0.411846788	0.580864247	0.663887419	0.600520878	0.507208134	0.581692294	0.346822027	0.583828094	0.870549434	0.75981066	0.733353931	0.641126297	0.488995457	0.623429799	0.566159421	0.535175943	0.633711809
0.520969858	0.634060663	0.386057618	0.652220183	0.796353676	0.748820799	0.754021116	0.617420962	0.412069755	0.467380871	0.734079379	0.622514222	0.569166703	0.48735751	0.471412901	0.346166935	0.422836263	0.64519212	0.501620198	0.661000838	0.539199444	0.702835451	0.684581598	0.457716236	0.322179396	0.680793309	0.725183697	0.731204446	0.445641734	0.401884298	0.421067573	0.488995939	0.501694148	0.334094605	0.596245261	0.738610529	0.575885223	0.459947849	0.584676368	0.384191011	0.539385741	0.789945132	0.679803347	0.674068864	0.664475123	0.452596868	0.587446278	0.533531844	0.560102054	0.571327989
0.516387664	0.635548632	0.323945294	0.601164846	0.709250357	0.683095658	0.838211367	0.580567775	0.337066864	0.443493713	0.655740142	0.558465648	0.563541601	0.443262238	0.479638502	0.38317663	0.451198056	0.661421045	0.473632195	0.696379581	0.605198019	0.716905763	0.717659012	0.473743812	0.243389498	0.678425062	0.708008623	0.638100255	0.549658807	0.476152291	0.486846153	0.530400389	0.541304028	0.259060615	0.631111075	0.796585106	0.544873058	0.420493862	0.57508628	0.434456749	0.478699454	0.689749511	0.569366156	0.613620599	0.65780969	0.451823722	0.548734193	0.521389211	0.541868514	0.514671633
0.512253899	0.617622247	0.29152375	0.589802787	0.621996182	0.602844005	0.881329599	0.53083922	0.295614408	0.452240471	0.571838975	0.489810907	0.541319385	0.410555484	0.479965501	0.425351043	0.481408547	0.656122242	0.455130933	0.683446962	0.673117167	0.683587087	0.726343705	0.486175729	0.189909792	0.630718532	0.653003247	0.536378808	0.66171099	0.578089197	0.583652642	0.579874866	0.598097772	0.218132844	0.687077803	0.816578264	0.520471943	0.40635283	0.557788967	0.470685262	0.421229536	0.607065491	0.465843551	0.568939821	0.617645564	0.467851034	0.511643564	0.514750342	0.483405543	0.472914635
0.512249145	0.591328114	0.29495561	0.599999252	0.556978349	0.527753679	0.859102987	0.49309655	0.297201871	0.489282195	0.503545606	0.434324104	0.50882077	0.408015671	0.477094148	0.459665374	0.496882941	0.626748834	0.447363708	0.634688687	0.713009866	0.617901926	0.703364384	0.487979149	0.175707319	0.555485952	0.577534039	0.453368204	0.739619541	0.673510856	0.690351702	0.623223679	0.655898985	0.218137516	0.749601342	0.798380561	0.510752373	0.420207844	0.539525248	0.474592216	0.380719144	0.566561912	0.404220929	0.548063775	0.551839442	0.476157747	0.476318526	0.503101234	0.402741407	0.444936232
0.517225974	0.566871945	0.32146006	0.607455506	0.522055431	0.473474394	0.773848161	0.48222248	0.326961312	0.532535017	0.462026978	0.403393735	0.472294267	0.435246464	0.471457895	0.472176393	0.487553427	0.581803758	0.438930545	0.572847285	0.704956322	0.54480808	0.653055018	0.47243556	0.188684652	0.478703776	0.503944741	0.402800561	0.75914808	0.726503224	0.773791609	0.64836115	0.695933083	0.238681334	0.793673688	0.755562824	0.51465096	0.450239642	0.52662556	0.448864334	0.359340989	0.568558615	0.400623752	0.547064599	0.477208471	0.461997709	0.442245682	0.486087412	0.3235374	0.422766057
0.525250614	0.548235867	0.346710618	0.599370747	0.511574526	0.446703002	0.654160436	0.495284745	0.355040155	0.555201239	0.445866062	0.398931533	0.436522208	0.473916074	0.459484767	0.454841907	0.456038222	0.537697507	0.415511862	0.517373817	0.650150499	0.485940595	0.591421155	0.437783709	0.209275975	0.421505172	0.448850353	0.379687227	0.721140484	0.717929329	0.80184905	0.650995009	0.705184946	0.259367358	0.796681948	0.706669431	0.522221516	0.477415647	0.522490816	0.416455216	0.349583431	0.591283537	0.443846879	0.551836485	0.41445532	0.428603327	0.411623004	0.469832248	0.264208527	0.398119533
0.532439072	0.532990957	0.351579417	0.580964776	0.513460677	0.443592386	0.545849534	0.513816847	0.362603588	0.541387863	0.444417912	0.413211853	0.404053847	0.498627966	0.436644616	0.411069191	0.415379055	0.509836327	0.37163305	0.475284011	0.56959003	0.450078335	0.538857098	0.389478415	0.213242216	0.390871507	0.416235117	0.365404677	0.64885608	0.654673138	0.758966903	0.635633926	0.682235634	0.258622889	0.751258515	0.664782122	0.519777538	0.485550642	0.525991713	0.406343216	0.341764629	0.605416047	0.499959049	0.544501976	0.375647979	0.39059791	0.388479308	0.462715261	0.230847805	0.368016662
0.534031445	0.516284252	0.335672349	0.567623306	0.517253455	0.451931366	0.47491064	0.514959139	0.344509403	0.503766816	0.444379273	0.431650638	0.376305707	0.491183676	0.401357011	0.36047782	0.38025539	0.503467281	0.321517915	0.4445612	0.491802558	0.432357871	0.50932344	0.344311935	0.194600876	0.378939675	0.398075403	0.348332806	0.573909347	0.564571255	0.655563473	0.611617641	0.637727891	0.233425894	0.670625744	0.632354325	0.49765429	0.469044995	0.531750642	0.434230697	0.331355253	0.59176849	0.528539819	0.512254849	0.362646132	0.363530495	0.37586466	0.467932056	0.216939522	0.336482996
0.527404037	0.49564103	0.306950471	0.569598908	0.518278345	0.456239	0.449213657	0.49343755	0.3090781	0.45623595	0.43586753	0.438150715	0.355850894	0.450646026	0.357425203	0.316618966	0.357732006	0.510396781	0.278731044	0.420705086	0.437623701	0.424785597	0.502470965	0.310999909	0.165889205	0.370643594	0.381772829	0.319265373	0.519464629	0.480525762	0.535036859	0.586960688	0.589286829	0.200922743	0.583081375	0.604336176	0.46134266	0.434926053	0.532485461	0.490529191	0.320905986	0.551581243	0.502992308	0.456595825	0.367779782	0.356774823	0.374069931	0.481685791	0.212542407	0.309758343
0.514848572	0.474607677	0.282157924	0.581167827	0.51636181	0.444037358	0.455544947	0.453061085	0.276749646	0.417344225	0.417917998	0.429070497	0.339342924	0.394317637	0.313581149	0.29122846	0.343652053	0.514132884	0.257880502	0.396883055	0.411247394	0.418296633	0.503887131	0.294375275	0.150838173	0.354655348	0.359746475	0.281240111	0.49033856	0.423518774	0.433057275	0.564059717	0.553447272	0.188515994	0.518489281	0.576643268	0.41988927	0.398935621	0.522566967	0.543896305	0.315729651	0.503655568	0.438194201	0.39265793	0.377391622	0.371598871	0.378701618	0.491992411	0.205829428	0.292158657
0.496794978	0.458229908	0.276100107	0.582727136	0.511423465	0.416463409	0.471586492	0.406479401	0.271161629	0.400115371	0.394773016	0.403666971	0.323663521	0.341472604	0.278707339	0.288295081	0.326883441	0.500550063	0.261638815	0.373734645	0.402136458	0.410350141	0.493956498	0.29288435	0.158189826	0.330888439	0.332906287	0.249226593	0.474947844	0.394428944	0.376097092	0.539971439	0.538545047	0.199937904	0.494237827	0.553160901	0.390350391	0.378154546	0.501209432	0.558934255	0.317321196	0.466138111	0.353280624	0.335069017	0.376741372	0.398248074	0.382250648	0.491897756	0.191520668	0.284952706
0.477110637	0.453472109	0.287775835	0.555004983	0.500320921	0.379131315	0.472253333	0.372275003	0.291277892	0.41118849	0.370147247	0.367978038	0.308297135	0.318575222	0.257078891	0.300832556	0.298416161	0.467434036	0.281796071	0.358063055	0.395218619	0.404121727	0.460537605	0.299742202	0.180546759	0.304623186	0.307663594	0.240569922	0.456725859	0.378739198	0.370135405	0.51304554	0.541932432	0.224818845	0.508345187	0.545485972	0.388693501	0.383756015	0.473699623	0.51903423	0.323585168	0.450954165	0.278472733	0.300052457	0.361795154	0.421149539	0.379561058	0.482413008	0.17334806	0.285834295
0.466417105	0.464830239	0.301960413	0.503951292	0.481251683	0.340486875	0.457152587	0.364892866	0.321485578	0.442068001	0.349057276	0.33561656	0.295460967	0.344575868	0.249038548	0.310650628	0.263028408	0.427009259	0.295620756	0.353787382	0.381865272	0.403620084	0.4124573	0.301192711	0.204380531	0.285822553	0.293652276	0.255297227	0.427233545	0.360162053	0.396946407	0.484881151	0.552616747	0.249281147	0.543107055	0.564873959	0.419697663	0.416748911	0.447695203	0.447260355	0.326707405	0.462252883	0.245716376	0.303430409	0.338496959	0.43389799	0.371587765	0.469577996	0.161407072	0.293201766
0.478576332	0.492579376	0.307342224	0.439319628	0.454917501	0.312209771	0.435757569	0.397871371	0.344608583	0.486228361	0.336839298	0.326765974	0.287252443	0.413583534	0.25077898	0.310226691	0.226690533	0.392880417	0.293076716	0.357529746	0.364041502	0.405625502	0.360859226	0.29553356	0.213438139	0.281948101	0.296528456	0.297521148	0.390963029	0.333866687	0.417718914	0.460040823	0.557677661	0.255703252	0.576511136	0.611757159	0.468903835	0.467805899	0.429722958	0.368180974	0.31994524	0.490502963	0.296352865	0.357642417	0.320993697	0.438722972	0.37469566	0.464925921	0.181785739	0.315658603
0.513408073	0.531455933	0.298839151	0.384835622	0.422223825	0.309128259	0.42211399	0.456870436	0.348627232	0.539048446	0.341452167	0.366129189	0.309424446	0.504662149	0.260369809	0.297249505	0.200357787	0.377141063	0.272831518	0.366152744	0.348331655	0.406195932	0.32322353	0.285744668	0.198738943	0.307739122	0.319303944	0.347390631	0.357908957	0.303419814	0.417762642	0.450069078	0.549005573	0.236068188	0.594327154	0.67056957	0.519305603	0.520577475	0.426714712	0.315050603	0.307671779	0.518820436	0.400424942	0.436787285	0.347943317	0.440504094	0.399300722	0.47998164	0.240105819	0.350976201
0.565174627	0.575103969	0.281525898	0.387179183	0.391298894	0.34730213	0.435252078	0.523848637	0.334258	0.597216547	0.38081286	0.447013633	0.367246609	0.598246835	0.281671466	0.276815589	0.192572152	0.38245174	0.246287037	0.381964399	0.341194758	0.40461109	0.313001725	0.27784193	0.166826025	0.353828971	0.354300081	0.378151386	0.343992291	0.289766463	0.399284244	0.463588847	0.529034712	0.200429838	0.595876412	0.714624825	0.550925618	0.556984935	0.443280458	0.314481858	0.306850157	0.543294396	0.526120225	0.515236411	0.424320989	0.446360041	0.446889782	0.511722216	0.323085054	0.393804464
0.619440587	0.613936844	0.274412071	0.458390053	0.385630517	0.417162502	0.482190538	0.581227716	0.308468489	0.650249339	0.450411161	0.548209154	0.448634449	0.668124407	0.314612006	0.262125001	0.214525549	0.401991336	0.227030515	0.407378763	0.349265585	0.406364545	0.348976907	0.277187928	0.140361652	0.408727436	0.386256339	0.37616586	0.368449896	0.313628053	0.384224064	0.497466646	0.505838725	0.173423849	0.59078465	0.719264206	0.550483215	0.562876618	0.470755834	0.359837186	0.332891922	0.567692393	0.637833634	0.569925083	0.535154777	0.46629566	0.508670136	0.547175321	0.4071404	0.435332827
0.655471393	0.638422787	0.290100492	0.566340121	0.426019186	0.501673879	0.548873468	0.618243837	0.287453095	0.679483194	0.535682774	0.639915057	0.531966424	0.693003226	0.359589608	0.287114158	0.251812278	0.418603265	0.225481011	0.442366494	0.367233766	0.421712589	0.408897884	0.289353625	0.148221382	0.462818449	0.405237717	0.348429431	0.423071648	0.372527026	0.39882705	0.538311272	0.487349311	0.184161236	0.58972466	0.682347927	0.518418572	0.532678208	0.497938043	0.411476421	0.393134467	0.593352788	0.705312434	0.583701612	0.649592723	0.50260097	0.56872755	0.573227163	0.468654349	0.463145815
0.653947335	0.642008252	0.327937838	0.677402039	0.506602253	0.578834647	0.616947758	0.613842877	0.285539844	0.674498289	0.616062905	0.692354285	0.595036883	0.672907918	0.415967627	0.35682936	0.293483958	0.423150502	0.253905947	0.488376946	0.390654907	0.459244921	0.471572762	0.307834795	0.192318535	0.512000773	0.411502145	0.308505949	0.489671193	0.445397101	0.456979999	0.569811913	0.479751818	0.234407673	0.59566705	0.6225569	0.47076145	0.481812654	0.51600301	0.448113637	0.480102732	0.620150908	0.691184928	0.544260881	0.731570747	0.549468009	0.60123137	0.577994391	0.475994655	0.460961763
0.615472333	0.624202981	0.373035752	0.760023141	0.61006059	0.625453499	0.672346797	0.577446349	0.304855395	0.631408013	0.667061837	0.674375461	0.606450433	0.621360589	0.47640795	0.460530993	0.333656894	0.417488961	0.298134109	0.544531217	0.425196841	0.518262095	0.519193813	0.322457993	0.254155598	0.542612672	0.408426824	0.290123787	0.553906632	0.509393978	0.548379217	0.575162157	0.482917677	0.303612694	0.601375627	0.56089854	0.42533656	0.424039915	0.517652265	0.459737175	0.569918473	0.645112132	0.612125963	0.477873846	0.733099846	0.595578623	0.596908109	0.559470896	0.432609806	0.434578856
0.55763851	0.5921163	0.404705322	0.777112082	0.709257482	0.616000724	0.698886823	0.525227484	0.331117569	0.559762166	0.662642847	0.602194732	0.567277258	0.560640424	0.52700214	0.575118872	0.375926852	0.413714863	0.339229195	0.597852963	0.48394394	0.582704603	0.545066289	0.325915169	0.305694594	0.559518376	0.407328953	0.320564689	0.60396863	0.538818477	0.642913309	0.550814994	0.490452919	0.362136135	0.594493433	0.520274534	0.393560584	0.373095459	0.499459927	0.449710044	0.631846538	0.658349474	0.503931216	0.417024241	0.656558522	0.627982859	0.564691922	0.529874173	0.367843635	0.401500587
0.50700229	0.558647877	0.404798869	0.732484126	0.768071103	0.560409582	0.691971382	0.47393685	0.354618947	0.483752205	0.612758517	0.513256564	0.502913796	0.514503122	0.560905791	0.672192734	0.420371877	0.425159678	0.365012421	0.633609859	0.573487304	0.626506341	0.536563726	0.318434345	0.32721246	0.570547985	0.423598916	0.400067782	0.626758985	0.520877774	0.700255632	0.511164925	0.494900976	0.389952022	0.572028791	0.516567532	0.379838794	0.34853797	0.471601265	0.441727384	0.64542534	0.649511701	0.404771026	0.385848195	0.536202359	0.635984713	0.525980197	0.504721387	0.318736317	0.384724967
0.485753302	0.53705279	0.374310061	0.656731673	0.760327175	0.483050435	0.663765347	0.436763577	0.367893377	0.43433007	0.54257363	0.448165418	0.446211514	0.500280119	0.572888736	0.709280352	0.479951208	0.463134317	0.376426593	0.643983513	0.694944527	0.626297028	0.509574378	0.30358727	0.306020569	0.579865871	0.460283964	0.501163803	0.631746506	0.469503537	0.69510611	0.470231483	0.493059069	0.373605047	0.538970081	0.541259495	0.386329941	0.366393042	0.447929338	0.458973395	0.610466385	0.615477341	0.340277427	0.390883375	0.420536643	0.614422362	0.502993289	0.494347569	0.311243592	0.401370559
0.500233813	0.53407347	0.332813489	0.584325661	0.69508866	0.411484005	0.626963138	0.421651233	0.370158629	0.434801183	0.480389187	0.431176104	0.421043513	0.522738174	0.561501099	0.682229021	0.562033525	0.528353605	0.373172652	0.62725139	0.830245054	0.576560643	0.482715467	0.29497852	0.264016236	0.586301506	0.505946444	0.582446396	0.632772035	0.411125641	0.628693415	0.44584468	0.484768285	0.336544029	0.50345885	0.56924034	0.40530507	0.41661076	0.440097219	0.508032546	0.54660444	0.564199559	0.317053735	0.421219299	0.358016466	0.565908125	0.50621245	0.499327589	0.346556824	0.451933151
0.537890906	0.545556366	0.305757776	0.535517759	0.602086948	0.364797597	0.589855374	0.431053474	0.367885809	0.48764934	0.444119925	0.459536622	0.430795594	0.572046159	0.529886604	0.608560521	0.659966895	0.607257133	0.373059641	0.589770876	0.944527492	0.502706896	0.466083598	0.303502796	0.234685489	0.584634489	0.540159504	0.609500397	0.641393119	0.371607579	0.528665774	0.448014825	0.475718296	0.313581388	0.477407365	0.587570099	0.431280112	0.487673578	0.452937293	0.574033469	0.483075308	0.512314216	0.32628857	0.457042003	0.36999391	0.501289081	0.52842088	0.512064789	0.400388616	0.51699489
0.574690688	0.557868809	0.30779407	0.50957832	0.51763737	0.347556835	0.555570439	0.462065562	0.368700068	0.570962994	0.433975579	0.507269367	0.458334771	0.627165346	0.484859371	0.518743907	0.753809336	0.678619895	0.386985543	0.543227474	1	0.427185059	0.458881252	0.33048278	0.240993572	0.568737111	0.543951165	0.572051717	0.663235303	0.36552217	0.436251823	0.471565994	0.476451402	0.327663325	0.471289042	0.594011114	0.46550153	0.566265936	0.483229714	0.629649284	0.444819586	0.478043872	0.353796608	0.48124374	0.443089873	0.437479657	0.54916187	0.522862504	0.436302468	0.564892496
0.589019246	0.555347722	0.333152406	0.492027316	0.46850662	0.352132785	0.524411416	0.506807496	0.375105396	0.647882855	0.435581213	0.540963816	0.477455506	0.66392586	0.434790378	0.442650452	0.818516743	0.72346331	0.411833173	0.498869024	0.974733566	0.384909727	0.454287675	0.366880195	0.28065133	0.535039938	0.510012537	0.488626813	0.697925624	0.392888433	0.388020965	0.498532663	0.494204521	0.374791487	0.486211413	0.595346139	0.510449977	0.633339934	0.522223713	0.651760071	0.442428093	0.473447823	0.389828097	0.487584616	0.53868286	0.392534567	0.547229822	0.526222083	0.426258481	0.567643027
0.57420232	0.531351296	0.359639053	0.469672407	0.461857684	0.367154545	0.496786333	0.553751894	0.382133575	0.684748834	0.431444855	0.538447302	0.468999564	0.664755312	0.38734895	0.39792197	0.835219348	0.732758579	0.433332236	0.462621077	0.875905541	0.396251517	0.447390961	0.398741376	0.328135476	0.485032334	0.447546519	0.396754649	0.740886919	0.443379956	0.401552077	0.520785856	0.530663016	0.426656585	0.512550177	0.605327998	0.561420214	0.673955396	0.560294361	0.635032723	0.470335586	0.499843866	0.432884387	0.481381684	0.615924861	0.379276568	0.513902067	0.523417118	0.367101291	0.516943644
0.542414269	0.49366262	0.363937915	0.442855541	0.485605028	0.386147014	0.474715041	0.590516082	0.380254545	0.667962743	0.413394949	0.499780868	0.432015078	0.62578427	0.347983646	0.385467628	0.799633436	0.709387768	0.436467177	0.434294925	0.739215981	0.456233374	0.440444877	0.415483066	0.351838408	0.42598783	0.379190062	0.334257955	0.784849204	0.503663142	0.471042391	0.534095106	0.581270698	0.449125602	0.544650058	0.637458039	0.611582979	0.687959628	0.591039649	0.594050654	0.512436686	0.5479095	0.485908866	0.47328347	0.643608277	0.400072316	0.459053237	0.520160865	0.283573083	0.43093943
0.517648087	0.458743163	0.342105235	0.426809124	0.517621189	0.410483291	0.461428017	0.607545724	0.364353485	0.609821368	0.387913634	0.444782267	0.383364547	0.557877234	0.319424464	0.393204383	0.723404826	0.664499309	0.416296089	0.411044808	0.613570654	0.5315118	0.441911814	0.415927824	0.334974287	0.369555365	0.331258059	0.321456811	0.820329348	0.562625768	0.572928867	0.542502646	0.63576352	0.424638374	0.580079022	0.691608272	0.651198471	0.684107801	0.612607035	0.553132883	0.550467721	0.601437041	0.548152352	0.470630845	0.617911449	0.44540094	0.406465354	0.521465326	0.215826683	0.346929793
0.52172487	0.449272446	0.305430813	0.441486633	0.537790336	0.444761036	0.459843957	0.601046948	0.338546872	0.539884106	0.370881501	0.3993726	0.346349035	0.480951414	0.301911608	0.404869545	0.628120512	0.611346689	0.382112316	0.392059034	0.538454051	0.602505431	0.460109521	0.408476899	0.286667638	0.328360775	0.321814035	0.35306925	0.836128112	0.611992733	0.676761391	0.555384459	0.678728419	0.364205218	0.618603326	0.75200518	0.668774732	0.672536709	0.625842296	0.530701602	0.570274056	0.642561151	0.608834378	0.471949839	0.559299594	0.497312835	0.381027624	0.527452209	0.198206488	0.303038679
0.561305976	0.479182051	0.284027019	0.496737335	0.536355752	0.488156566	0.470998296	0.573508727	0.307260231	0.4870739	0.375306566	0.379586739	0.335750019	0.414404093	0.293673635	0.408609862	0.535552787	0.560294008	0.352420116	0.380560342	0.525797834	0.648352931	0.495909708	0.40547776	0.236244631	0.311476313	0.352216713	0.403106765	0.821476475	0.643907986	0.755402126	0.579291608	0.700233697	0.301405833	0.656526372	0.794947376	0.656083909	0.657526564	0.630906992	0.528177304	0.563972395	0.656720924	0.647719912	0.467805591	0.497567095	0.536451603	0.395230722	0.532969528	0.241105338	0.318534783
0.623209109	0.54408278	0.304894771	0.582568374	0.515250409	0.528594307	0.493028677	0.531452144	0.283553385	0.463306838	0.40049931	0.383120687	0.348859536	0.372021085	0.291414014	0.401048559	0.459326444	0.516986797	0.344073988	0.381287772	0.555939611	0.665659928	0.539542936	0.415357422	0.214645561	0.320401752	0.406242353	0.439286891	0.770248889	0.64943067	0.790984383	0.611960198	0.697816867	0.272145959	0.69195568	0.801404765	0.612818383	0.635142143	0.625025015	0.530182283	0.529434833	0.636628472	0.643421132	0.447126384	0.455592893	0.549428236	0.442587314	0.531153738	0.325930671	0.383770726
0.680499348	0.622797025	0.374208842	0.670935403	0.483697389	0.545238084	0.520851698	0.488303711	0.283135515	0.461916491	0.430470918	0.393240224	0.368134316	0.352181521	0.290922371	0.385751509	0.401906556	0.483232433	0.36236176	0.395248573	0.589663437	0.665999981	0.573872242	0.437274437	0.234941528	0.347535289	0.457321397	0.439024664	0.685540785	0.620874862	0.776611935	0.642694143	0.676626887	0.292698802	0.717820056	0.766998565	0.548337902	0.597417928	0.603290106	0.515588892	0.469834649	0.590361062	0.58515695	0.417443796	0.439596316	0.533171914	0.501334054	0.518422812	0.41559733	0.465512072
0.705766921	0.690844415	0.467220671	0.728364643	0.452278771	0.519358588	0.546653	0.452164168	0.311706468	0.467489059	0.443280371	0.396887668	0.373539891	0.345578057	0.288041177	0.368355446	0.357550164	0.458667394	0.397822492	0.415976295	0.589636006	0.66455645	0.582352634	0.461272731	0.284106182	0.378439668	0.480519243	0.403176407	0.581588025	0.557360268	0.715876324	0.65893933	0.646657807	0.349361697	0.723822832	0.703875288	0.479346386	0.540576119	0.562376466	0.472293562	0.404544434	0.534478771	0.494929687	0.381470444	0.440057054	0.494560599	0.545720766	0.499990657	0.474028101	0.524622758
0.684267945	0.72614522	0.548569291	0.732264358	0.42928719	0.466118476	0.561525008	0.423938538	0.360949389	0.461629953	0.432829131	0.385357795	0.361514327	0.341516444	0.283305874	0.352115654	0.31862011	0.441594572	0.431155543	0.430865231	0.539682512	0.668021074	0.556994273	0.473472779	0.330685839	0.397495086	0.463535364	0.351837751	0.480740397	0.469562066	0.621843683	0.654547707	0.618432913	0.405683913	0.702548124	0.634065576	0.424280948	0.471885532	0.515654658	0.413982223	0.342588052	0.482103925	0.3985752	0.348048855	0.441005146	0.44879898	0.558086528	0.481376313	0.483242185	0.535912353
0.627225137	0.720553785	0.580352597	0.681836185	0.420287822	0.395811712	0.558392065	0.403227561	0.418997542	0.438334956	0.40234233	0.367633003	0.33608319	0.33437013	0.276163579	0.336612252	0.281219118	0.428855856	0.442760606	0.431423213	0.463669304	0.669602777	0.501781347	0.462964653	0.342969821	0.394547258	0.419847108	0.303617085	0.404720394	0.384788114	0.52112683	0.633928988	0.598968573	0.422542001	0.655610594	0.578732795	0.396726883	0.407500988	0.468870101	0.356081944	0.301468934	0.45312897	0.319815482	0.327361112	0.431033006	0.409871518	0.535126195	0.471400211	0.44864486	0.498853306
0.559247999	0.680726008	0.544422839	0.597883571	0.42890697	0.331665403	0.535590073	0.390998281	0.46380859	0.408091437	0.367463166	0.364290297	0.316061813	0.322982213	0.268030233	0.323429652	0.249742892	0.420835698	0.421258076	0.417619547	0.385605105	0.65415391	0.442365523	0.426495558	0.314873298	0.373586866	0.368314935	0.275116027	0.362542811	0.322439803	0.436066822	0.608988839	0.589568182	0.390197741	0.595258961	0.547017115	0.40061709	0.362496614	0.431410421	0.326339165	0.299523367	0.46130533	0.282590463	0.326376854	0.409429132	0.383683817	0.489954707	0.474447693	0.390726939	0.433611253
0.499445863	0.62180563	0.465975129	0.512163251	0.456210902	0.299432317	0.504274981	0.384203072	0.471104514	0.387805049	0.352339997	0.390578985	0.318081799	0.31503158	0.261750738	0.311056511	0.226822187	0.413759838	0.380243504	0.393896032	0.331495187	0.609853123	0.391360228	0.381900903	0.262944262	0.34547039	0.326942097	0.27374397	0.360246703	0.299732636	0.383929398	0.590729745	0.586163789	0.326275115	0.53964591	0.537330249	0.429204232	0.362526055	0.412521205	0.342487764	0.344342431	0.500567825	0.296677652	0.33393344	0.384733789	0.371576236	0.444127007	0.48760948	0.329740567	0.373096396
0.462611963	0.558934974	0.376070802	0.452374508	0.498048348	0.321432443	0.472687144	0.393625431	0.443640692	0.394487638	0.367556675	0.438804687	0.342934536	0.317353507	0.260492824	0.300488033	0.2149875	0.404867472	0.332964442	0.371882155	0.316377332	0.541032793	0.357365251	0.338371685	0.206779057	0.320832392	0.308284204	0.288476115	0.384360842	0.3171874	0.374527585	0.581283709	0.581887076	0.253187472	0.502357149	0.541055176	0.468194055	0.405563123	0.419693766	0.402510057	0.417103771	0.551980231	0.339123262	0.348019689	0.367960235	0.372037585	0.407224232	0.499379555	0.282560088	0.334307002
0.459274688	0.508060623	0.302350066	0.430511051	0.54263805	0.365980415	0.452233163	0.423344216	0.390798544	0.44154665	0.394410113	0.489294965	0.36776634	0.34489227	0.262602751	0.294671964	0.213643246	0.394286657	0.290254164	0.364869077	0.342605476	0.46834807	0.342390472	0.303706815	0.16730726	0.307989829	0.31380279	0.300758468	0.414135175	0.357875436	0.401430856	0.572191605	0.57069313	0.19839322	0.487486351	0.547992203	0.50168213	0.470897597	0.441517168	0.477678396	0.501528926	0.600119548	0.390981872	0.368215328	0.36557328	0.378513114	0.382292702	0.505249407	0.249449787	0.31708329
0.482097009	0.470455403	0.263510439	0.439715848	0.571894013	0.407561155	0.450500974	0.468303836	0.326047509	0.511979655	0.41582626	0.512940809	0.381950319	0.387115441	0.266860249	0.296011796	0.218461493	0.38563626	0.260680622	0.373389624	0.373923396	0.409716296	0.343178868	0.282935995	0.156015698	0.308515223	0.32587277	0.304877714	0.432412117	0.390261206	0.437866427	0.550731549	0.550485395	0.180475969	0.489701596	0.550932577	0.51835679	0.530123187	0.468808945	0.544819631	0.572225819	0.628265694	0.445629303	0.398248611	0.376587026	0.385077632	0.367802362	0.502327461	0.219982888	0.30919683
0.516371349	0.445309704	0.262891785	0.459978092	0.56808599	0.423124174	0.464343117	0.516766547	0.270540879	0.580365462	0.418343493	0.497071037	0.372416695	0.428180701	0.270681903	0.300212481	0.220801055	0.379477293	0.248977937	0.386381966	0.390479469	0.380615322	0.342427922	0.278048304	0.16270242	0.312569956	0.330627842	0.298081816	0.435967429	0.398723041	0.459623422	0.519110845	0.524439256	0.190466364	0.497879069	0.54971398	0.515318272	0.563970838	0.49111483	0.577828322	0.608362927	0.632722379	0.500341306	0.443574891	0.394774753	0.390173976	0.358308204	0.490413953	0.188083866	0.298011138
0.555618438	0.433339412	0.274802162	0.472530006	0.534821832	0.40726329	0.477294088	0.556176427	0.245256131	0.625697811	0.392174484	0.448049383	0.337667616	0.454517893	0.272160328	0.304072468	0.218753517	0.379148364	0.243347299	0.39528804	0.385132801	0.390325762	0.339928849	0.275959036	0.169228739	0.309892247	0.32256116	0.28269287	0.421625942	0.378512078	0.457021217	0.478471423	0.499304332	0.205819689	0.500993002	0.546206432	0.497919098	0.551494012	0.501752623	0.565755093	0.605210069	0.625918438	0.558713862	0.505919699	0.413493571	0.392524457	0.348271838	0.474451555	0.159432803	0.274860356
0.593154047	0.441167712	0.283517523	0.470590506	0.48191996	0.369365595	0.482729197	0.570175562	0.245115599	0.632866905	0.348202428	0.38255212	0.296245404	0.460701069	0.271884887	0.303642046	0.213395567	0.385150111	0.239717848	0.392081451	0.3634849	0.422931125	0.337739866	0.275906141	0.170178404	0.297841677	0.303940675	0.270384618	0.39935898	0.342163731	0.430520412	0.440365583	0.480003103	0.216226221	0.49663156	0.542074625	0.475866319	0.502922431	0.497263322	0.51565177	0.573539435	0.62753973	0.624556634	0.579714581	0.42932052	0.391360352	0.354516605	0.462232355	0.151196869	0.270434096
0.617286455	0.464278356	0.284988438	0.451916738	0.425380534	0.347556835	0.473356543	0.56112257	0.260793054	0.597176075	0.321248408	0.331152698	0.290362899	0.437851728	0.274028862	0.298912984	0.209413787	0.399711009	0.238906025	0.376755459	0.331249749	0.449120616	0.338307388	0.277959976	0.165835659	0.287758086	0.289204298	0.280701853	0.379740208	0.305590041	0.389546439	0.431018909	0.470045231	0.216445385	0.488987015	0.538384173	0.457646075	0.44278112	0.479813313	0.447393289	0.530518614	0.649997602	0.6911975	0.649580865	0.442175867	0.38867519	0.392069142	0.45796982	0.190815787	0.311291689
0.618812712	0.49405967	0.280614784	0.42359878	0.386369695	0.377531594	0.453458717	0.543809277	0.283084972	0.540723694	0.348976894	0.33816437	0.33699453	0.402382902	0.286050301	0.29706354	0.221178165	0.418820045	0.241267082	0.367007904	0.320363781	0.454850687	0.351380696	0.281216201	0.160664288	0.304590208	0.30800022	0.318222138	0.367422843	0.285398778	0.352580304	0.46340723	0.469784083	0.208068273	0.485555754	0.536082035	0.446226866	0.395252182	0.459507068	0.385863601	0.488292683	0.687370142	0.738157012	0.694139141	0.452532582	0.38892276	0.458050475	0.466918166	0.280367395	0.407859701
0.596031967	0.516052436	0.285303186	0.39835168	0.387030002	0.468587865	0.445066007	0.535869438	0.302984214	0.48704883	0.434339802	0.404090548	0.434091398	0.37190933	0.31538026	0.309259926	0.250410046	0.437197429	0.24594212	0.384505286	0.361448701	0.440337851	0.382236343	0.283852759	0.159105875	0.363360076	0.370700628	0.379636726	0.361817051	0.300794026	0.344956104	0.520502242	0.476035659	0.197260048	0.494336927	0.539889613	0.438400268	0.375482244	0.443943518	0.343422554	0.448003406	0.71578982	0.739312673	0.695047146	0.458479296	0.397208528	0.538273328	0.487662811	0.399953685	0.54497559
0.555455012	0.518499283	0.308569402	0.390788452	0.420039974	0.593977564	0.470835516	0.547046725	0.320033027	0.45083398	0.55641365	0.504305574	0.56065755	0.356986578	0.365313037	0.345493515	0.293246284	0.453685023	0.257229824	0.440138065	0.452666369	0.409496322	0.427580635	0.290019893	0.162254944	0.465822033	0.47174183	0.453315367	0.359394369	0.344091054	0.386878223	0.583270487	0.490439971	0.190718014	0.514372265	0.554528162	0.428567498	0.380734558	0.435277081	0.329364048	0.407245506	0.706575121	0.678859074	0.646552668	0.455338015	0.416465845	0.612859484	0.514247307	0.516256812	0.686219429
0.510501325	0.497197392	0.354717188	0.415913032	0.465362604	0.702476492	0.537741651	0.573008762	0.337042688	0.433151216	0.677516129	0.609465921	0.682782587	0.357690401	0.43209218	0.408969391	0.341795442	0.471357637	0.288983899	0.5301333	0.574825076	0.39510034	0.48373683	0.311226435	0.167847721	0.596623743	0.590881961	0.520862143	0.361569314	0.398255173	0.46701141	0.630903579	0.511585316	0.214189139	0.540779429	0.577553524	0.414753438	0.396615155	0.431514814	0.343243892	0.365415956	0.652149973	0.565219853	0.559923963	0.438443184	0.44511545	0.654877292	0.53854334	0.588352921	0.771156483
0.472849252	0.464055379	0.423865611	0.475725943	0.504332844	0.745425153	0.63668344	0.597814543	0.365592196	0.427697917	0.754595431	0.688627887	0.757413382	0.366320788	0.504766348	0.491310574	0.386674929	0.490006671	0.341514432	0.633748945	0.703994043	0.422706761	0.547354449	0.351685279	0.187014022	0.720743028	0.69644419	0.557448614	0.378147457	0.452974501	0.56769868	0.642126859	0.535538913	0.268847818	0.569955056	0.603369768	0.396220041	0.408526194	0.432935261	0.377825139	0.322355679	0.570667856	0.438375281	0.465120301	0.41430059	0.476800802	0.649017886	0.552899956	0.585444327	0.765730341
0.46724901	0.451698676	0.512699274	0.561520828	0.52666488	0.703797743	0.739201663	0.603872434	0.41761033	0.427067243	0.753547698	0.70736056	0.76726631	0.373931724	0.568159042	0.572798233	0.412548188	0.512207878	0.41388646	0.716745866	0.806305145	0.499352001	0.605754794	0.413401668	0.220702116	0.794047817	0.748685566	0.553971583	0.41364039	0.50225961	0.66806504	0.618871779	0.559670816	0.347978287	0.600766517	0.625407228	0.379313233	0.413625727	0.444781429	0.423306278	0.287953972	0.485505195	0.333413229	0.387978954	0.386262667	0.502690722	0.604966039	0.548802177	0.518909452	0.673577612
0.502380578	0.486338495	0.60460999	0.656201359	0.530786048	0.599243251	0.805942806	0.583354592	0.493373846	0.432590711	0.685570467	0.667442569	0.722301262	0.376397432	0.607848303	0.630718993	0.419746958	0.538736373	0.501348487	0.751589464	0.853825286	0.607381694	0.647008677	0.491953597	0.268262607	0.794237248	0.736311679	0.514204339	0.467792894	0.533480331	0.744508262	0.58312595	0.582983361	0.439730165	0.632505604	0.636333536	0.385499695	0.420215776	0.470975539	0.478320717	0.276284532	0.427949333	0.278044814	0.342059376	0.360999615	0.515201885	0.544479136	0.529592792	0.423544671	0.534217617
0.569408186	0.572477599	0.685276722	0.734677784	0.530384555	0.482201396	0.810732525	0.543767051	0.575489097	0.445308783	0.58816453	0.59251763	0.650801649	0.376386083	0.615088811	0.648634093	0.414785438	0.565460451	0.587984528	0.72990438	0.849712521	0.717248631	0.665392962	0.569264468	0.326073367	0.724925688	0.67024082	0.452597308	0.532915027	0.548897545	0.77218196	0.561743431	0.599437767	0.529632986	0.669005786	0.634386316	0.423098968	0.445585523	0.514767736	0.535596129	0.30207327	0.419483188	0.290896259	0.328447906	0.345916405	0.510994058	0.490113179	0.50558776	0.338149975	0.402667161
0.647964385	0.686041843	0.741126557	0.766974474	0.546131898	0.403777019	0.75467901	0.503775173	0.642767338	0.46677231	0.502933271	0.514101612	0.582637334	0.380368281	0.589595305	0.62309748	0.406233475	0.585766955	0.645623267	0.664530671	0.81200508	0.784436771	0.657312118	0.61728711	0.384589346	0.613580198	0.576801713	0.388038177	0.590836081	0.549729328	0.755379216	0.570523935	0.609985476	0.58222712	0.709272634	0.629353058	0.488344053	0.502984865	0.574329228	0.587411343	0.348865744	0.462518614	0.347664327	0.336500274	0.345427668	0.491545908	0.454774805	0.489641249	0.285972805	0.317250568
0.719686055	0.785904689	0.760940851	0.746900776	0.585215164	0.387838648	0.665824303	0.481530234	0.674625782	0.494176617	0.453808244	0.456146972	0.534509847	0.392896577	0.539057544	0.564489669	0.39988848	0.594145285	0.663301726	0.580647401	0.763034607	0.786004099	0.624762574	0.620923372	0.415866154	0.498215533	0.484873771	0.336401293	0.617204556	0.533875848	0.707998526	0.605254911	0.619446744	0.587805132	0.744968426	0.63392232	0.570758023	0.590998729	0.638098599	0.625357631	0.392004161	0.516609881	0.396452215	0.345049089	0.351593301	0.46130034	0.437706672	0.49099858	0.266038402	0.288241473
0.756924507	0.829476848	0.740472798	0.68509501	0.632932395	0.419750774	0.583857329	0.482797999	0.664306764	0.520802878	0.438145767	0.426005655	0.504828924	0.412010309	0.475736353	0.491676716	0.395938768	0.588682151	0.640419642	0.501833112	0.718504672	0.724315634	0.577142844	0.579324585	0.406560833	0.409907034	0.41392057	0.305169789	0.602068824	0.498577654	0.646120722	0.644820801	0.631921317	0.550224025	0.763245898	0.656222798	0.652239142	0.6904374	0.687411207	0.639684647	0.408402112	0.549901606	0.40992342	0.343408341	0.361210369	0.430723561	0.428564833	0.510213953	0.259550449	0.300757286
0.751509531	0.800963818	0.686139533	0.603698245	0.659510862	0.458183862	0.538391864	0.496791603	0.624327377	0.534031988	0.43469293	0.415375124	0.479702135	0.428875291	0.411811951	0.42338444	0.389571559	0.571222848	0.589762337	0.445440773	0.68158546	0.624833345	0.528869686	0.50992074	0.357591201	0.3604103	0.368833638	0.292321819	0.549223232	0.445781387	0.582279236	0.664073913	0.648876608	0.486477732	0.753556396	0.693718171	0.703052982	0.770776079	0.709260101	0.622749203	0.391972199	0.546186478	0.387335934	0.333503583	0.374450836	0.403579509	0.416511563	0.537946381	0.24642907	0.319730871
0.712419941	0.718254457	0.614549501	0.526520284	0.639173905	0.462586429	0.533561947	0.503087592	0.57985292	0.528643789	0.422051875	0.409273493	0.445242982	0.432194982	0.355691675	0.37077975	0.374485539	0.545612823	0.533277976	0.410928962	0.64449846	0.523177986	0.492899171	0.442429172	0.28639431	0.341168932	0.343305572	0.289928909	0.476445182	0.385713529	0.523410847	0.648400495	0.667687489	0.421640378	0.714163814	0.732577804	0.710689121	0.803012703	0.697953666	0.573604179	0.344965208	0.515474021	0.33561553	0.323015979	0.385900631	0.380480271	0.398552073	0.558938598	0.220201756	0.319780427
0.657375166	0.62281667	0.546369954	0.469734367	0.569920513	0.42755226	0.548276076	0.48596602	0.553456213	0.506833023	0.39433869	0.397281061	0.398538778	0.415071265	0.312514562	0.337000484	0.347199448	0.515582215	0.491552698	0.388069669	0.596149643	0.448590573	0.473596015	0.404499252	0.221954723	0.333467682	0.327226115	0.289162753	0.40868632	0.333017374	0.472218792	0.601329886	0.681643595	0.378783028	0.654128565	0.753778132	0.676200899	0.77256653	0.657518151	0.5011914	0.299821929	0.467444378	0.296741936	0.338615888	0.391782158	0.362461954	0.377069011	0.559892623	0.185632624	0.298973726
0.603565475	0.55604687	0.496763814	0.4370512	0.478696453	0.364175313	0.552149	0.448152105	0.550762665	0.476825618	0.357657369	0.376952991	0.34829824	0.384985436	0.281774987	0.31696276	0.309773909	0.483773048	0.472615563	0.368245762	0.531380585	0.410593169	0.46393025	0.406554281	0.191361639	0.322618171	0.312951006	0.284691239	0.361695871	0.298107876	0.430205177	0.541271234	0.682141483	0.368038276	0.589476756	0.743130647	0.612413019	0.686131801	0.599674066	0.42381088	0.304914326	0.453857447	0.31611598	0.383739523	0.390821685	0.352584672	0.359980806	0.53755574	0.158872526	0.274255334
0.560637383	0.53620975	0.467793999	0.421426146	0.397493217	0.3034451	0.528792951	0.400390492	0.556629011	0.448801425	0.329275706	0.35359384	0.305631887	0.348939504	0.259564238	0.302048106	0.269647769	0.452328562	0.467325041	0.350994445	0.456781413	0.403971634	0.450102364	0.435227656	0.205122251	0.302476782	0.300139064	0.276719557	0.353230944	0.286107172	0.400352227	0.490296047	0.662715342	0.380991492	0.536062533	0.699705914	0.537835278	0.569710388	0.538874922	0.359749966	0.375182345	0.499172649	0.401516398	0.450192072	0.384406385	0.364840236	0.354891831	0.502582242	0.173716531	0.286016826
0.529491832	0.550130115	0.448132687	0.413432422	0.386157196	0.298344111	0.481623463	0.37116893	0.545225721	0.432450822	0.350970996	0.350142858	0.282265068	0.321839413	0.243741476	0.287336896	0.235438739	0.424242764	0.455409839	0.337981666	0.388186925	0.412190679	0.422080062	0.460634251	0.25054294	0.28560416	0.301327879	0.28085007	0.38290422	0.302157768	0.388020965	0.460824151	0.623222148	0.39487037	0.503608792	0.637603113	0.469895451	0.459285332	0.48743666	0.32046695	0.489457314	0.593098426	0.524485896	0.521373551	0.372914541	0.403506789	0.37845251	0.476388262	0.236231546	0.349485102
0.506667278	0.564845482	0.421424541	0.413172766	0.457214107	0.372023524	0.429600582	0.400376273	0.498387041	0.434476108	0.423554302	0.38677743	0.303589651	0.328006925	0.239531286	0.274164716	0.211340599	0.401511565	0.419691653	0.361920244	0.337343488	0.422199425	0.381045611	0.454492788	0.298334368	0.304690567	0.33273451	0.306703839	0.435139001	0.336644275	0.399549239	0.455124987	0.571794918	0.385728745	0.494237827	0.579637136	0.420139311	0.377998575	0.451303821	0.325953851	0.602873646	0.695309658	0.641967753	0.579832176	0.36557328	0.466053829	0.421215045	0.481696056	0.323134749	0.451567512
0.48776328	0.551887927	0.378899806	0.432198323	0.581357359	0.491864649	0.429423883	0.48878624	0.420624841	0.457094855	0.524798542	0.462857959	0.36945574	0.374623419	0.266155064	0.28529261	0.198419474	0.385374371	0.360125318	0.428523747	0.313543013	0.432955848	0.33636796	0.408775773	0.319416722	0.371442448	0.39166138	0.356652623	0.490009267	0.375423948	0.438967369	0.463937818	0.522843667	0.343852266	0.505417566	0.54120845	0.39063432	0.348620615	0.429929355	0.369582511	0.670182555	0.767716337	0.710072464	0.596882562	0.372207754	0.541308385	0.471695841	0.531015137	0.406107247	0.562140983
0.471715367	0.508642898	0.328170392	0.476101425	0.703292859	0.619752734	0.500837164	0.608346901	0.340430115	0.498978034	0.628144724	0.56532443	0.46107381	0.450120316	0.326578201	0.330533775	0.21205132	0.388569481	0.298180936	0.527556934	0.340017617	0.45649653	0.333287446	0.343086581	0.30196829	0.478585728	0.467168231	0.425919383	0.538454192	0.413021538	0.504147288	0.476588526	0.487547831	0.281978378	0.534171212	0.535445895	0.388239315	0.382103689	0.421352959	0.432506062	0.65645299	0.771649114	0.704903898	0.573241884	0.3989076	0.614203618	0.519731966	0.61890406	0.461572859	0.648091679
0.465791501	0.452793769	0.29152375	0.544587906	0.782530856	0.7211587	0.627738348	0.726498207	0.295614408	0.555855781	0.710124798	0.673141324	0.55848509	0.541865933	0.417675805	0.411036266	0.252967243	0.414998727	0.26715681	0.637831937	0.406982401	0.502948384	0.394989183	0.29497852	0.257927828	0.606119104	0.543559614	0.504564141	0.568094617	0.449276154	0.584399687	0.488356482	0.472692388	0.230067486	0.578883149	0.555375731	0.411828561	0.462818879	0.43501797	0.495448232	0.573069279	0.712047398	0.64252009	0.523082557	0.443945931	0.65813806	0.560879946	0.722392473	0.463896588	0.669903041
0.486303717	0.435985548	0.293242731	0.626162134	0.773862323	0.758993694	0.770766066	0.806773332	0.310645936	0.618692687	0.733041034	0.75025392	0.641577576	0.630309568	0.527340146	0.516583347	0.322193745	0.465609564	0.292646103	0.736666427	0.49715234	0.575044848	0.52174595	0.297775027	0.214448752	0.721978961	0.599999494	0.570847673	0.580544596	0.477881853	0.661562107	0.503605414	0.48218849	0.218132844	0.637405837	0.584054489	0.456610548	0.562321944	0.467144872	0.546588086	0.460964247	0.622422209	0.558463959	0.466882952	0.496245065	0.670002046	0.582149995	0.80998069	0.421285693	0.632942688
0.532354751	0.486925119	0.342888365	0.696104319	0.690326476	0.728589664	0.889617283	0.815708132	0.379738193	0.674324351	0.700343851	0.767454773	0.67598301	0.688494844	0.633602544	0.628750476	0.423073848	0.541120669	0.374311073	0.784571448	0.600128844	0.660573891	0.688256568	0.358808108	0.195438502	0.785936323	0.619633308	0.613224814	0.587531746	0.498303603	0.715460721	0.526650627	0.504532209	0.256535915	0.703564635	0.604843922	0.513329477	0.658256118	0.510674508	0.565070176	0.367000958	0.543786125	0.485375255	0.422872237	0.538617781	0.661533507	0.592174647	0.855203065	0.366556502	0.567874738
0.595434364	0.600141301	0.42517034	0.725774652	0.578155811	0.657891701	0.928330745	0.764249154	0.466844988	0.709158971	0.631420771	0.720853204	0.652771995	0.707844756	0.701504265	0.709054078	0.55596373	0.641308305	0.480657574	0.779282942	0.708205403	0.736443086	0.858769921	0.451794053	0.205033634	0.788538755	0.609195325	0.630698097	0.602116919	0.511001403	0.73233169	0.560257038	0.524630371	0.325977866	0.76588099	0.615438199	0.571388	0.720896494	0.55630732	0.553754623	0.319217843	0.501452421	0.436250538	0.40151496	0.555592333	0.652466511	0.600283068	0.848245379	0.333547103	0.513066225
0.661731196	0.734471072	0.504064238	0.706862484	0.489084579	0.578711405	0.883017518	0.684191386	0.523879066	0.713285349	0.550299244	0.626894375	0.586486142	0.693297089	0.720597984	0.739485561	0.698267376	0.750803993	0.561684023	0.737467324	0.79521196	0.780240089	0.971336351	0.529210345	0.224031361	0.74246244	0.584952032	0.630330183	0.632691564	0.513963409	0.712384393	0.600739956	0.535624614	0.384702376	0.810901442	0.615575051	0.6096374	0.727430259	0.593089614	0.523338268	0.315590672	0.493997738	0.403390445	0.404930179	0.542357201	0.658738368	0.610712599	0.799955508	0.340445914	0.494472158
0.712801958	0.842989555	0.540473434	0.649953859	0.452955943	0.510483211	0.783282029	0.609852318	0.51725024	0.685111723	0.476293394	0.516706286	0.503585439	0.659341517	0.695593309	0.719467522	0.833553359	0.857214853	0.573788685	0.684478071	0.859430893	0.782111157	1	0.548443019	0.238357244	0.674983743	0.564102824	0.622375334	0.679238055	0.506448395	0.671844952	0.639726774	0.538526842	0.39264013	0.829841672	0.616964055	0.616730057	0.681709093	0.602501788	0.486363471	0.332046482	0.500269696	0.372126855	0.429866512	0.509484332	0.682647477	0.620372409	0.736370197	0.382148046	0.514388752
0.726875514	0.873325826	0.513963011	0.579619884	0.465015593	0.456068099	0.673790708	0.560721192	0.452447664	0.632996968	0.420065828	0.424494271	0.432760836	0.622085486	0.643574848	0.664035569	0.94100685	0.944732543	0.508144026	0.642327289	0.899400755	0.749375757	0.949759556	0.496569175	0.228822905	0.614487255	0.556449701	0.614168931	0.732789787	0.492526867	0.636751506	0.669099954	0.535716193	0.353867181	0.824082281	0.629430985	0.592304938	0.604587796	0.586800118	0.45270486	0.343245286	0.498501717	0.33842977	0.471032089	0.479401365	0.711141737	0.621091375	0.686582773	0.434859702	0.554331697
0.703366962	0.819956611	0.437469854	0.521566868	0.494185392	0.409915348	0.590582711	0.534840665	0.363130103	0.572176582	0.385010858	0.374681605	0.393944657	0.591299406	0.585483824	0.596223515	1	0.996576396	0.402237937	0.620855842	0.910256385	0.700874804	0.850570272	0.405722671	0.193658099	0.578067107	0.56052037	0.60612475	0.777941256	0.480650053	0.63010657	0.685012949	0.538016523	0.277546376	0.804994287	0.653582555	0.548645729	0.526484191	0.559189269	0.428540414	0.341873941	0.484020022	0.317053735	0.522239629	0.474964907	0.723684923	0.604869035	0.669914572	0.469582067	0.588582408
0.652900804	0.71595372	0.347894311	0.489373428	0.505976759	0.370605677	0.545418896	0.515816295	0.294077501	0.518101838	0.370881501	0.373385838	0.390627691	0.566471411	0.536160243	0.53632846	0.996211179	1	0.293440442	0.615743114	0.884461902	0.654756914	0.739605994	0.318510077	0.151363219	0.566065581	0.565782175	0.592006626	0.797583581	0.47850957	0.658498948	0.688021516	0.550766527	0.196743715	0.787084636	0.679832044	0.505877612	0.475763553	0.53760977	0.418071862	0.343690676	0.473447823	0.333583759	0.575247285	0.505603043	0.70518263	0.569224517	0.688363141	0.466855217	0.59913651
0.592358815	0.613231817	0.289240363	0.479001007	0.485391279	0.347556835	0.526250266	0.48801339	0.281419349	0.479826531	0.376369342	0.408088592	0.409407186	0.538966253	0.498303261	0.49352565	0.927031948	0.951998658	0.232608808	0.613263331	0.817013372	0.617848276	0.64267094	0.281001471	0.139042908	0.565315932	0.559366871	0.563296665	0.778674559	0.486490968	0.706002925	0.679833268	0.569222938	0.163817472	0.778302171	0.694293363	0.48244116	0.467511784	0.535193304	0.425283084	0.375183889	0.492599337	0.405107095	0.618455134	0.559049815	0.656031921	0.519861923	0.727358634	0.425257352	0.583185023
0.538288318	0.553529386	0.288211111	0.474614027	0.445979828	0.356587925	0.511727079	0.44977769	0.328005589	0.457406173	0.399348101	0.45553195	0.427661239	0.499246677	0.463759438	0.464051853	0.803968884	0.862749688	0.246409945	0.598629129	0.712085778	0.583842434	0.56568058	0.309892288	0.164601091	0.558330619	0.53354024	0.515246065	0.717557156	0.494970803	0.740254407	0.660110698	0.580924289	0.204918784	0.77403693	0.687810282	0.48582841	0.497852951	0.552897199	0.453232331	0.452187255	0.556239795	0.522659627	0.638035855	0.604563362	0.592829593	0.46927673	0.763684331	0.360129608	0.550051726
0.501660869	0.547399259	0.338807769	0.462017876	0.420287822	0.407437779	0.489339524	0.416182992	0.397659064	0.444910621	0.435763281	0.493753728	0.426023411	0.445291744	0.421468299	0.436615819	0.650696083	0.754147247	0.318514694	0.563711586	0.586656914	0.541643111	0.500300872	0.384094637	0.221340705	0.533088309	0.490023024	0.45125575	0.623095158	0.48875804	0.729034386	0.626744527	0.574035187	0.286685344	0.759603002	0.662447608	0.508955279	0.546815093	0.579040305	0.500657664	0.563776734	0.653420506	0.648331806	0.622298108	0.607371624	0.538920549	0.431833199	0.776222752	0.29433762	0.51156192
0.485753302	0.572953251	0.404625331	0.44082212	0.43835689	0.492377486	0.46525763	0.409672593	0.445697881	0.435023968	0.478981904	0.511996001	0.399247323	0.387355529	0.367420814	0.401711881	0.496967189	0.652927005	0.395390328	0.510931303	0.467831238	0.488052465	0.438478338	0.451505275	0.283197377	0.48851575	0.439105599	0.38307126	0.516006655	0.457095331	0.659043429	0.579941133	0.546580506	0.374523843	0.7205526	0.631309314	0.53451509	0.588569407	0.596429854	0.558395871	0.672529248	0.748668023	0.730908169	0.567378728	0.56191456	0.510351559	0.417408467	0.75445198	0.246661019	0.473507324
0.487180618	0.593641935	0.444335353	0.426809124	0.507781596	0.584684528	0.459843957	0.444669984	0.443974101	0.425960179	0.520541192	0.513383274	0.359266363	0.345771211	0.310495722	0.359320205	0.370172102	0.580806072	0.444641736	0.452224763	0.381992182	0.435446029	0.384342	0.477139253	0.32036783	0.433615799	0.394246654	0.326432509	0.423641158	0.403088787	0.552789015	0.526725556	0.510346461	0.430941594	0.654524271	0.611573256	0.544916143	0.603864675	0.592920388	0.609184487	0.731923559	0.79921418	0.731887372	0.49282969	0.484111284	0.505880211	0.426366462	0.701371617	0.223864668	0.434091427
0.49885263	0.582879923	0.433019018	0.442029681	0.607206206	0.649299539	0.492199497	0.516016332	0.396952278	0.429324948	0.551784388	0.509346993	0.328206693	0.342040911	0.270114431	0.318066305	0.287353128	0.546098373	0.440007117	0.404038136	0.348963904	0.407816516	0.35625332	0.44604118	0.309009787	0.381680023	0.365104269	0.294172709	0.371122383	0.344216848	0.44477924	0.481174664	0.486079811	0.424131438	0.577941724	0.614696687	0.53193526	0.588114194	0.568792212	0.632779932	0.71089578	0.778218328	0.646516908	0.418259998	0.39597036	0.507427326	0.448216719	0.630548897	0.219841138	0.389607432
0.513310015	0.539912547	0.382814125	0.498247634	0.696589543	0.659860731	0.564052859	0.598701435	0.329874028	0.453190134	0.565252085	0.509564032	0.324878358	0.387235146	0.266320189	0.288111152	0.250578862	0.541047583	0.389056411	0.380560342	0.367845959	0.426208539	0.373280012	0.38173853	0.262791544	0.343284836	0.352656852	0.290123787	0.371709206	0.308225301	0.366976819	0.458300549	0.491952587	0.360600032	0.512126115	0.63945356	0.500346228	0.550974375	0.536116203	0.61482084	0.611063104	0.692968703	0.517242639	0.358650975	0.328904361	0.493786764	0.464980126	0.56092852	0.221205744	0.345241919
0.525311175	0.487752742	0.319044593	0.584352858	0.73764292	0.61193469	0.653630925	0.659393637	0.285105511	0.498637596	0.555366385	0.513859722	0.352467474	0.473704109	0.307533224	0.289111403	0.247582797	0.546518892	0.321959575	0.387748334	0.418226239	0.492273993	0.438618018	0.316287622	0.202227374	0.321836558	0.348965505	0.306896825	0.420382428	0.313947137	0.356512601	0.46445787	0.531839661	0.277476218	0.484097837	0.671871715	0.463570877	0.508219149	0.510376661	0.55480063	0.483179019	0.587023303	0.393897348	0.32504495	0.308118398	0.463607888	0.464628645	0.508219159	0.22054562	0.309136485
0.533158518	0.455851008	0.278952745	0.666806406	0.71253462	0.52449099	0.723890041	0.673113355	0.290631684	0.556942976	0.519079702	0.511367861	0.394986477	0.575008298	0.383083851	0.319748058	0.257721852	0.541987995	0.267309715	0.420315661	0.468467674	0.581199684	0.530115116	0.283293854	0.15732547	0.313822961	0.348384048	0.328825272	0.494102435	0.360154824	0.408065769	0.490823082	0.5907757	0.218798446	0.499986356	0.692244299	0.434490775	0.471335201	0.499821938	0.473202606	0.366937406	0.495155462	0.312854272	0.320072853	0.328875093	0.416236901	0.446507917	0.4780799	0.212350617	0.296940873
0.538684079	0.459718189	0.283649728	0.704644976	0.630968412	0.43695772	0.74068571	0.635412007	0.342954039	0.610524342	0.472441137	0.489433897	0.425211228	0.655119804	0.465401514	0.364627708	0.261176459	0.515969567	0.247691301	0.462939301	0.491640891	0.650418116	0.607147707	0.291471254	0.154419316	0.311970931	0.34204646	0.338946092	0.559713578	0.423716817	0.481687682	0.515751419	0.641195867	0.213184899	0.543761166	0.685466878	0.417634654	0.441598581	0.499793651	0.396156618	0.293716315	0.444472836	0.290241444	0.326429212	0.369416535	0.365279291	0.41110479	0.470656638	0.19814459	0.318883452
0.546034298	0.49104913	0.326182081	0.671474829	0.535474405	0.372808533	0.69052595	0.563306405	0.404153141	0.634483949	0.420765204	0.453248997	0.424075779	0.683194586	0.521519785	0.40322419	0.252416455	0.471718726	0.263288413	0.49559346	0.473304121	0.660882799	0.62989005	0.323555594	0.190757301	0.309721414	0.326635173	0.333809763	0.586988506	0.472312519	0.540349468	0.521970208	0.657252661	0.25791979	0.584193941	0.6491852	0.411165984	0.419445586	0.496233764	0.342428618	0.280413109	0.446995655	0.310636402	0.33764389	0.406355401	0.34249948	0.368657342	0.480711472	0.187353927	0.371252926
0.559599802	0.5244785	0.371429455	0.590672481	0.45379702	0.341166578	0.605451013	0.48824695	0.437866718	0.618833051	0.371795086	0.40529207	0.394908252	0.647074768	0.528259192	0.422402884	0.230779419	0.424092951	0.291768011	0.501353908	0.423687349	0.606249782	0.583831423	0.346589685	0.234458461	0.307075175	0.306423506	0.31319148	0.561487653	0.478748828	0.568564942	0.503582771	0.629403655	0.322962891	0.600055671	0.600733987	0.40602326	0.396209417	0.484011312	0.324838515	0.31350062	0.48088846	0.332423691	0.355206332	0.423028104	0.369303269	0.345078063	0.500030125	0.191338665	0.432445528
0.581737837	0.53599565	0.396056528	0.489136262	0.40565949	0.33590302	0.512884914	0.43330744	0.420780202	0.570080003	0.336909073	0.358764349	0.34765558	0.558934891	0.483155936	0.408264537	0.212160343	0.391105779	0.312503266	0.47766244	0.371864307	0.515142663	0.49051541	0.34918755	0.269534358	0.311145219	0.295335479	0.286180126	0.498085037	0.440245804	0.55537975	0.465487833	0.571508555	0.373881105	0.580434716	0.555943371	0.395938537	0.372094894	0.458399355	0.340598363	0.347701798	0.505966669	0.33410268	0.385866028	0.419263134	0.437757765	0.363070183	0.522658665	0.212023734	0.480327325
0.611179328	0.520484395	0.389898293	0.408338429	0.397994059	0.342522375	0.441925612	0.406747644	0.365356019	0.508538299	0.327797325	0.331375923	0.307027016	0.456710752	0.405333841	0.371145734	0.216476034	0.392234661	0.326160634	0.436470438	0.352761695	0.421274493	0.39839577	0.336427632	0.291728109	0.329583059	0.310053282	0.273557012	0.421699268	0.378979823	0.524447538	0.436886594	0.512786866	0.394762516	0.541037099	0.535028572	0.387824679	0.3631295	0.431395318	0.370766949	0.367623265	0.51020514	0.32400132	0.438273367	0.406996964	0.538639103	0.427457119	0.549080534	0.250012081	0.495950997
0.642904206	0.496575299	0.368541076	0.388854272	0.421949766	0.343911115	0.420719554	0.402943975	0.303955611	0.458106316	0.350209521	0.34075749	0.30082496	0.370395121	0.327029755	0.331438277	0.256900274	0.429586035	0.343026149	0.390017915	0.390779365	0.373248972	0.357140403	0.332382772	0.306096088	0.367953059	0.357170859	0.294048915	0.35683297	0.329273588	0.504938735	0.448069308	0.484655405	0.394085469	0.510279181	0.548208579	0.396066354	0.389483259	0.426146033	0.399568314	0.374085599	0.497794806	0.324406757	0.515980658	0.404503349	0.655044438	0.535372908	0.580277986	0.301806637	0.476407008
0.669677083	0.495328103	0.363504267	0.440534121	0.448535655	0.346381469	0.453502152	0.408614544	0.28316012	0.43433007	0.398691981	0.379859147	0.335538466	0.327860471	0.275493837	0.308438343	0.327077709	0.491131223	0.381355746	0.361769833	0.487484249	0.395194672	0.389701518	0.360718178	0.331750124	0.426501322	0.432048086	0.348774852	0.340853885	0.317407334	0.511140036	0.504839331	0.503688828	0.398499622	0.510954553	0.591532676	0.429585162	0.454831019	0.459158828	0.424977507	0.373894586	0.480379868	0.362368282	0.607561961	0.430599174	0.75886138	0.6688362	0.617245507	0.358315581	0.435543689
0.684602964	0.539719854	0.400641464	0.519801202	0.46904907	0.363257955	0.507222311	0.410404035	0.331683927	0.437633349	0.457327048	0.433452937	0.3914194	0.336581574	0.264117889	0.310283903	0.413809665	0.557531471	0.45364858	0.370693482	0.619194836	0.467742668	0.478703089	0.425312634	0.381768839	0.496748386	0.519987348	0.432118379	0.383758709	0.346312453	0.533386393	0.586571744	0.563295548	0.432887745	0.545442924	0.64411033	0.488266387	0.552299852	0.520234354	0.449027575	0.384032132	0.481249865	0.448141148	0.693276013	0.484837405	0.830016083	0.79179392	0.657671687	0.407851266	0.39516326
0.683501327	0.627836837	0.480926158	0.59106801	0.47845369	0.404715916	0.566170064	0.409580559	0.441816851	0.455425824	0.505722689	0.481576605	0.450105054	0.383799698	0.287792054	0.330580954	0.490049225	0.611299996	0.553178427	0.418469222	0.745873782	0.543967437	0.575825027	0.503784141	0.450367044	0.56328932	0.597890629	0.527259828	0.466040471	0.394643657	0.546283727	0.662130201	0.637148296	0.50148259	0.593960197	0.691287461	0.557851568	0.654681113	0.590034794	0.478240374	0.416040534	0.515282046	0.56379932	0.748198587	0.546715281	0.859079336	0.865828788	0.693905017	0.439361313	0.372149399
0.666020134	0.730440005	0.575919389	0.623794433	0.474280031	0.470072625	0.621512148	0.416108409	0.569606525	0.471370179	0.529586852	0.510443783	0.492945293	0.438686459	0.328909418	0.35337487	0.531203101	0.636115774	0.653029877	0.490457937	0.827573844	0.593610506	0.629360984	0.559008732	0.512733058	0.611457427	0.636925306	0.605820084	0.561566262	0.430836906	0.528637523	0.692365753	0.695296266	0.582036941	0.627096009	0.717688539	0.610783559	0.721491507	0.638198848	0.515117201	0.467925693	0.579602968	0.669626283	0.752781544	0.587121807	0.844729644	0.869420525	0.71391678	0.443797274	0.369421392
0.635185016	0.804776268	0.641263938	0.603719795	0.460933686	0.543473591	0.663591989	0.438703237	0.666639129	0.47582789	0.514023727	0.512278337	0.509191787	0.485277539	0.367425959	0.363264002	0.526530729	0.631870703	0.717406522	0.5719262	0.84112428	0.594078131	0.614114232	0.561640025	0.538054308	0.630703828	0.628007079	0.64326099	0.649320977	0.43327427	0.481431651	0.659359171	0.717770452	0.636701497	0.62470425	0.718408732	0.622482574	0.722294272	0.639768985	0.552823457	0.525391041	0.654835112	0.724535382	0.702488147	0.584882489	0.790203155	0.803783459	0.705739412	0.415722248	0.376057208
0.595989182	0.816730598	0.640574904	0.548505069	0.448089481	0.601246094	0.694675198	0.478127683	0.691096056	0.471059856	0.475983047	0.492396316	0.504802949	0.511380304	0.393666634	0.354553933	0.484112159	0.608605929	0.718980502	0.638344469	0.789501358	0.555962478	0.546065095	0.509090764	0.507645714	0.617766398	0.578103423	0.628272169	0.697747625	0.403691028	0.431044495	0.583464729	0.704107993	0.632994257	0.589047375	0.699847356	0.584508978	0.652874431	0.593380581	0.577354038	0.570406337	0.715115486	0.708043843	0.611096721	0.538651972	0.702349188	0.69114795	0.663929267	0.35892041	0.376060098
0.554447617	0.758624658	0.565826294	0.49604281	0.448097351	0.623838962	0.720688924	0.524356448	0.632806198	0.468317028	0.442842305	0.472111964	0.494783021	0.519680489	0.407764971	0.33410187	0.426752529	0.580774429	0.652741359	0.670443756	0.699599176	0.51488233	0.473019537	0.428452392	0.426849593	0.577072241	0.506090178	0.567057493	0.700001914	0.365185305	0.414356712	0.499749006	0.670917341	0.562360842	0.543695839	0.675552534	0.51674599	0.544611176	0.523417321	0.576181111	0.590997281	0.740563956	0.630628515	0.505611214	0.467650799	0.593615403	0.565427477	0.598407259	0.293479461	0.359834989
0.519414079	0.652832433	0.454458765	0.48228682	0.471626483	0.605816908	0.744029399	0.561023377	0.517006086	0.479159709	0.436674803	0.467935598	0.49060602	0.522368119	0.416228873	0.316394369	0.380728266	0.560592291	0.539037546	0.660875757	0.609458029	0.508935516	0.446561472	0.361096433	0.323391513	0.51859818	0.434008108	0.48064396	0.664800907	0.346076981	0.454496073	0.449080018	0.640497127	0.445650565	0.518770148	0.659363722	0.445512803	0.438530646	0.46732763	0.547559245	0.586325112	0.725543334	0.526760666	0.415275957	0.401515888	0.487600352	0.459739639	0.528319077	0.228988828	0.33272826
0.49318054	0.545736452	0.345275405	0.521320217	0.521891405	0.558010661	0.760631861	0.574629708	0.396656087	0.506858005	0.461593152	0.482111055	0.491477874	0.53206684	0.4241181	0.314060594	0.363055146	0.553392793	0.414586343	0.614753219	0.550937099	0.555540684	0.491637057	0.338477709	0.233338869	0.454435733	0.378181166	0.39631442	0.609101917	0.360114326	0.542763304	0.45130831	0.627688311	0.326710609	0.531833101	0.659043058	0.393892598	0.372644304	0.454974121	0.503683637	0.564861035	0.679337896	0.435544422	0.360267172	0.36557328	0.405911579	0.396113976	0.47644766	0.180167046	0.307345719
0.479423594	0.469775665	0.277005276	0.598415325	0.589980509	0.50091635	0.762651358	0.562305807	0.309441475	0.543398726	0.501738693	0.502470898	0.485318227	0.553829859	0.429610486	0.329656188	0.373781717	0.55655846	0.316467166	0.545691536	0.535966273	0.641151315	0.591427641	0.364247926	0.183206408	0.395577413	0.344393165	0.336837958	0.549278431	0.39610898	0.639123796	0.493997796	0.632535036	0.241204818	0.576480105	0.673046299	0.378173341	0.366346855	0.491858032	0.464660266	0.53790824	0.620260417	0.38091989	0.34548705	0.369682882	0.371902855	0.381027624	0.465865372	0.168072589	0.299411415
0.480457062	0.444017859	0.270074195	0.678980354	0.654941452	0.453737078	0.744415505	0.533178904	0.280183607	0.573824841	0.531199368	0.511205474	0.458642684	0.582333816	0.424614013	0.353642236	0.397157202	0.56187463	0.26715681	0.475985909	0.552775036	0.72904008	0.696105625	0.413614217	0.178533794	0.349931263	0.328854837	0.312137639	0.495543954	0.424163903	0.692276291	0.536084424	0.642318874	0.210410264	0.62571776	0.691531489	0.396493733	0.410681333	0.555991507	0.446430388	0.513043947	0.567076522	0.362704888	0.36176884	0.405826586	0.397217241	0.407273073	0.50552347	0.201052133	0.315322306
0.494300107	0.462636321	0.315014003	0.727345307	0.690686186	0.425658658	0.707474675	0.502558859	0.305756785	0.584922976	0.529855452	0.496813692	0.413394857	0.605195432	0.400825976	0.36967185	0.410800792	0.55984089	0.267324456	0.419806272	0.57364228	0.779503188	0.750126568	0.449784853	0.204678183	0.321686671	0.323474288	0.316892552	0.451676116	0.421649107	0.667880235	0.549053048	0.640800455	0.230506564	0.647837129	0.700899743	0.426442051	0.471026484	0.610252251	0.450290046	0.49120469	0.531891283	0.362294253	0.39271656	0.454148726	0.475030003	0.459830757	0.580911475	0.263972152	0.347304053
0.511420141	0.502238974	0.369608643	0.724444821	0.677794036	0.41391983	0.661426152	0.482761869	0.360749203	0.572676566	0.495470196	0.461825275	0.360155446	0.610013057	0.359776324	0.366935971	0.397800411	0.544008353	0.298680343	0.382453271	0.570080463	0.770124855	0.722204287	0.446633772	0.237915423	0.311476313	0.321814035	0.334807903	0.418578538	0.387331422	0.58433899	0.528938345	0.618560053	0.278837083	0.627107181	0.68982924	0.451885215	0.519299392	0.623022306	0.461271348	0.468250602	0.516939091	0.359567469	0.422790071	0.492764582	0.577216924	0.522263581	0.663850808	0.345189298	0.375560195
0.525500981	0.53051196	0.408591552	0.675070328	0.61438198	0.408636139	0.619908689	0.476409476	0.406717718	0.543949655	0.444676776	0.421726253	0.320121134	0.591051382	0.313528915	0.348445811	0.355299197	0.513730683	0.334331434	0.365741445	0.527759443	0.704902072	0.621102115	0.403765807	0.259193486	0.316692111	0.322227431	0.347200417	0.398076956	0.331868441	0.47705286	0.484019376	0.57832999	0.324225808	0.579768585	0.655545085	0.468787434	0.542168516	0.585214912	0.457334557	0.4391157	0.515580742	0.346724783	0.442458368	0.505758852	0.674394788	0.580947775	0.72363087	0.424325856	0.383867385
0.528997596	0.537087279	0.41849307	0.602034782	0.531053435	0.400324865	0.593995235	0.476240602	0.428398729	0.511694486	0.40245343	0.39597552	0.314771165	0.55211449	0.272899311	0.320117859	0.299568897	0.474498943	0.351207344	0.369718405	0.461615652	0.608668338	0.496173731	0.347089553	0.26238657	0.331768553	0.326800333	0.343661142	0.393780163	0.286943308	0.386113617	0.441899631	0.53413435	0.351970528	0.524053793	0.612292517	0.478105035	0.543465644	0.522038394	0.430408568	0.401713422	0.516391964	0.324888673	0.448793252	0.48733005	0.737719582	0.626376963	0.734349306	0.475141779	0.370562306
0.519258875	0.52104997	0.401422479	0.532084359	0.451997609	0.385685777	0.586584564	0.47113982	0.420318172	0.487005847	0.386827942	0.396666789	0.350241035	0.504463638	0.252750673	0.29400617	0.248474719	0.435919499	0.340643807	0.383701833	0.391896656	0.51562217	0.392165767	0.302072809	0.253398658	0.348807139	0.337466266	0.327831922	0.408358843	0.285543219	0.347870697	0.433191264	0.499531015	0.358099037	0.482473398	0.5686274	0.486407293	0.539805064	0.45888947	0.384332317	0.364691499	0.511862277	0.307748196	0.442888058	0.455361482	0.752741377	0.652526375	0.689305821	0.483158117	0.343473187
0.501880994	0.493533553	0.373514123	0.48236147	0.404115612	0.369811397	0.590748391	0.456437219	0.39277512	0.473033048	0.398357078	0.421514492	0.407574708	0.461227366	0.259465722	0.283027157	0.217223614	0.408145503	0.312749764	0.399645788	0.344217335	0.448976786	0.343089827	0.286421948	0.242571496	0.359070356	0.352309067	0.305974959	0.439409597	0.329126974	0.369257832	0.463481088	0.483413821	0.350108788	0.469711356	0.53512228	0.497425798	0.545933192	0.42509531	0.338734966	0.331410221	0.499478069	0.309310495	0.427009692	0.416262999	0.721977228	0.655905222	0.614152751	0.450077278	0.314479534
0.488904879	0.468368155	0.352059159	0.454757973	0.40143296	0.356633838	0.592897017	0.435700874	0.362939536	0.466016033	0.420649697	0.454967935	0.461652976	0.431297441	0.284179433	0.290427497	0.212591354	0.398047484	0.279035274	0.412220779	0.337646118	0.412769809	0.349971727	0.296559574	0.236516374	0.357602702	0.364685896	0.287839836	0.477271297	0.387721407	0.410612892	0.505629	0.484648373	0.338738831	0.482353901	0.524518179	0.506878851	0.562837224	0.431501294	0.325350006	0.308526785	0.479735739	0.332054291	0.403663184	0.376990058	0.659577986	0.635375219	0.535726309	0.390526223	0.295843077
0.492759239	0.455280275	0.344806806	0.442605046	0.435780587	0.348662766	0.579275218	0.415458207	0.344233053	0.462025667	0.431061448	0.476369069	0.488308715	0.415624688	0.308636169	0.305130407	0.228821699	0.406512715	0.2563116	0.416097214	0.371748902	0.400282053	0.384609771	0.314375626	0.234691743	0.347341065	0.367458265	0.280991514	0.506973714	0.429856915	0.438942307	0.5357246	0.493707737	0.330532295	0.49542924	0.539974614	0.504512441	0.576351448	0.46610302	0.365101085	0.304738398	0.463018297	0.366135497	0.378265143	0.344978658	0.58232397	0.592734316	0.475492895	0.32324394	0.293283684
0.518848951	0.456633719	0.347614457	0.43442977	0.471835335	0.34531241	0.549481747	0.403795844	0.339679395	0.454901026	0.425677888	0.470217219	0.47506506	0.407432372	0.32182731	0.318450395	0.248083615	0.427930337	0.256850105	0.408145738	0.419458902	0.401224656	0.408518608	0.321224051	0.231913244	0.330223036	0.36210328	0.284941666	0.513765375	0.432813048	0.44213564	0.536540065	0.501802798	0.325272394	0.501377769	0.566703941	0.482900764	0.566891714	0.495089796	0.448560899	0.325538149	0.464446134	0.403352134	0.355220666	0.327598177	0.5057806	0.533299366	0.449868039	0.267904251	0.297368618
0.561071991	0.46928588	0.350557602	0.425116347	0.493680944	0.343687846	0.509864271	0.404577957	0.342065795	0.443369773	0.403826332	0.446148542	0.429364816	0.397713889	0.316976269	0.323233879	0.259197815	0.4521763	0.27927143	0.392889947	0.457211808	0.404403381	0.410306877	0.312741781	0.223710698	0.311609599	0.348396359	0.289950571	0.491469943	0.398747322	0.422701768	0.510463618	0.503663432	0.318500676	0.498901752	0.595168333	0.449707516	0.523624969	0.503875029	0.548719233	0.364548307	0.491154518	0.434924368	0.34213841	0.318844067	0.443147065	0.472062277	0.462503667	0.230116466	0.297823254
0.603384462	0.48822731	0.347148808	0.420718097	0.494742356	0.341721111	0.468212587	0.412371692	0.339877484	0.431433975	0.376024597	0.410933856	0.376406729	0.385146504	0.299182047	0.318342699	0.258270704	0.468456138	0.306551838	0.380560342	0.466063285	0.405647291	0.3855635	0.294772759	0.209962334	0.298422076	0.330395211	0.290767774	0.455363327	0.341680586	0.397613066	0.473046961	0.497652703	0.306151344	0.492976828	0.614199713	0.412784717	0.463982912	0.491259359	0.630159379	0.417287202	0.539604815	0.456146694	0.345018977	0.34435153	0.394001531	0.419142525	0.494571458	0.205304185	0.295338108
0.627228654	0.510183619	0.339830157	0.431692041	0.483122978	0.344574297	0.436088364	0.417407658	0.330496576	0.423774161	0.356354249	0.376202382	0.334025005	0.366182101	0.275987029	0.306528181	0.248417192	0.469553649	0.324730661	0.382364125	0.442443967	0.407169797	0.348159303	0.281685372	0.196611434	0.297039048	0.314689285	0.28602154	0.413916598	0.290240176	0.386255267	0.450315009	0.487010513	0.287707782	0.491179512	0.612046813	0.386603295	0.403597272	0.462613106	0.660029327	0.471292803	0.598843366	0.466174921	0.364484835	0.408042137	0.364009736	0.379821922	0.536748142	0.187322603	0.299182464
0.621072117	0.532824252	0.338007662	0.461922399	0.477255352	0.358160562	0.430968924	0.414809412	0.31318129	0.419873649	0.353545819	0.352748073	0.315048031	0.34279209	0.258177813	0.298032481	0.239013251	0.454753334	0.327117774	0.404414551	0.400509764	0.410254047	0.325446959	0.283029786	0.187872946	0.306066759	0.305943238	0.283206914	0.377670139	0.276056935	0.393434249	0.456465113	0.477641167	0.266115528	0.497723594	0.594112638	0.383203362	0.364445157	0.432822229	0.628305129	0.508941527	0.648242369	0.464185148	0.392414754	0.502346579	0.364685808	0.363281435	0.58963896	0.181610616	0.322693828
0.586725249	0.553320193	0.350265902	0.50861896	0.491045353	0.385209885	0.457803321	0.404733031	0.2933635	0.422521728	0.3578722	0.351107463	0.31935073	0.32178476	0.255456647	0.303136991	0.239921446	0.431152178	0.31194767	0.44355172	0.357782641	0.416715609	0.336026432	0.293582371	0.184757629	0.325207493	0.303925387	0.294218494	0.354946237	0.301748869	0.408365154	0.484448971	0.472377346	0.24623414	0.507142293	0.565636053	0.400417721	0.360460406	0.419746105	0.550978948	0.516778852	0.66828228	0.447701719	0.419113965	0.610278354	0.40241178	0.375215291	0.652970795	0.194598614	0.375018746
0.540763241	0.56700989	0.376425659	0.559746835	0.522193668	0.422634952	0.508501132	0.397605223	0.282963248	0.432410597	0.36675025	0.364025129	0.337472764	0.319535173	0.268210339	0.326425112	0.256263709	0.408146481	0.283701681	0.487668279	0.338094849	0.431480173	0.380112337	0.303550594	0.184404439	0.351743185	0.313912514	0.329654227	0.34742479	0.340961969	0.415083171	0.507659313	0.476418701	0.231804561	0.510580597	0.53740525	0.41779339	0.38625436	0.430315751	0.460071513	0.492228125	0.652859982	0.415307108	0.433650778	0.709188667	0.470906866	0.410002215	0.724043697	0.237434027	0.45359176
0.500785657	0.568119151	0.405228355	0.597397635	0.551843359	0.459981622	0.572544356	0.405317551	0.290664037	0.44996235	0.382245912	0.394652859	0.35576327	0.341397015	0.288915446	0.362665305	0.286157721	0.39605323	0.254845113	0.520855957	0.355154986	0.462242912	0.451515734	0.303252537	0.182576426	0.382509597	0.34011671	0.39279543	0.347627448	0.37545133	0.401469668	0.5108578	0.492659055	0.222401126	0.50168976	0.525598584	0.425973538	0.411098689	0.452920633	0.387216779	0.446237269	0.613315019	0.373187905	0.431239386	0.762572305	0.561733757	0.463127033	0.793834999	0.314655974	0.538396558
0.481574297	0.552448847	0.419690087	0.60799401	0.556272831	0.484555496	0.636004162	0.434040676	0.311223902	0.476508899	0.413417652	0.444951039	0.375751752	0.391900155	0.313707856	0.402662073	0.321848623	0.400712118	0.243353131	0.530976239	0.404864401	0.515404217	0.538627682	0.291104163	0.17531817	0.412527422	0.385009544	0.475393459	0.363012034	0.398091391	0.373772871	0.490799016	0.520709597	0.216391826	0.482278562	0.540243253	0.419199012	0.420636595	0.479362929	0.348302537	0.399403551	0.572819559	0.333281759	0.41589711	0.76120659	0.651591475	0.529381427	0.84493099	0.416265889	0.599744684
0.48597624	0.524570386	0.407062125	0.588410107	0.527248597	0.48793578	0.680162214	0.480282392	0.337655265	0.513718506	0.471678785	0.514371125	0.400850216	0.467403167	0.33932481	0.433412884	0.352975129	0.420919777	0.254076744	0.515745742	0.471004775	0.588653255	0.624792267	0.281661362	0.167355712	0.438600424	0.447728909	0.556616829	0.401818572	0.413219365	0.366419812	0.460809392	0.556739338	0.213725357	0.471352136	0.571825185	0.398553866	0.410983145	0.503541901	0.340384844	0.372580128	0.553574594	0.314087398	0.398273395	0.711814251	0.712584778	0.593910786	0.856940328	0.513176798	0.612425418
0.504795245	0.492960404	0.372082725	0.546674646	0.47644408	0.470016767	0.692841605	0.532463155	0.361465284	0.559714528	0.559377857	0.593402371	0.434985497	0.55735839	0.362948053	0.445022275	0.370174308	0.447799209	0.28208357	0.484067683	0.539867937	0.665971784	0.693155618	0.292319729	0.168757324	0.459250376	0.518678614	0.613022559	0.469519521	0.441089913	0.406786477	0.448799766	0.592802514	0.215485292	0.488714212	0.612188475	0.383298996	0.394383386	0.522091158	0.347614878	0.376513371	0.563961377	0.329925303	0.389694465	0.6328041	0.72711592	0.641464001	0.817240628	0.573464895	0.568890057
0.521162113	0.464472304	0.328257687	0.497436982	0.425025763	0.438717836	0.678023568	0.57216764	0.37378245	0.61047169	0.663517269	0.666721557	0.476389671	0.638944874	0.384534142	0.434734041	0.3677808	0.470941107	0.317881816	0.451817841	0.593468506	0.720625678	0.733545594	0.330916439	0.186651081	0.473383297	0.582608517	0.628558841	0.564220008	0.50076519	0.498062238	0.475377145	0.619396527	0.222396596	0.543826645	0.651327196	0.395402778	0.396053567	0.537350239	0.353767969	0.406279862	0.593433619	0.381303529	0.395729093	0.546754622	0.695575648	0.661071026	0.730778848	0.577337891	0.484470067
0.525608629	0.446068138	0.291256794	0.456454689	0.403470354	0.405710814	0.648193874	0.58670346	0.372605003	0.65933793	0.756039011	0.717411613	0.515131056	0.694193271	0.40513939	0.408032124	0.345260243	0.48002387	0.349737673	0.43420605	0.620654982	0.72702046	0.741242659	0.388653342	0.220568077	0.479551004	0.6233937	0.601530774	0.668009284	0.592256369	0.621452308	0.537478227	0.631704095	0.234768607	0.6301863	0.678302641	0.44277521	0.43830265	0.555131741	0.350893498	0.44401057	0.618669399	0.450008138	0.412879359	0.473040172	0.635151301	0.649806793	0.622140751	0.527078329	0.391943665
0.516784381	0.443070751	0.277030978	0.431405496	0.42709809	0.38082515	0.617315038	0.575101863	0.363082641	0.698088691	0.804363334	0.732429046	0.536788774	0.714657096	0.425235592	0.376461752	0.307490503	0.469967769	0.366721362	0.438554794	0.618387284	0.67569224	0.7162908	0.443408169	0.261884787	0.476400678	0.629612789	0.544801927	0.754827877	0.690548737	0.73905562	0.611288723	0.632157264	0.249414599	0.728574611	0.690402285	0.518679053	0.524923098	0.579376792	0.342086656	0.468670679	0.617674278	0.509665101	0.430183304	0.423049215	0.570274621	0.61363947	0.527015403	0.445809932	0.324337364
0.501715743	0.450955655	0.288133073	0.424231415	0.482626566	0.368264298	0.594060925	0.546985354	0.352987914	0.71893352	0.787507963	0.708101262	0.530060477	0.702364251	0.443811001	0.352960959	0.267056072	0.447526086	0.365820295	0.460978086	0.59038846	0.581942891	0.664047316	0.46640786	0.295885155	0.463790134	0.599386783	0.47897875	0.799911925	0.756418533	0.802785325	0.66932982	0.62946887	0.259712797	0.808593775	0.69534175	0.60677563	0.635271281	0.608622894	0.338351123	0.467339329	0.583376343	0.534334754	0.434744226	0.398737749	0.520061111	0.564475257	0.476388262	0.36522795	0.301468428
0.48835283	0.46153801	0.307811086	0.431922493	0.539190296	0.366257254	0.578793598	0.5155867	0.346911254	0.716448516	0.70821873	0.652381823	0.493386769	0.666795614	0.458196	0.346375485	0.232639982	0.420451636	0.353871017	0.488332828	0.54470792	0.484134434	0.595677544	0.444059209	0.308318427	0.443400885	0.541464513	0.422080683	0.790217197	0.757910925	0.791215889	0.690364958	0.633798977	0.259037494	0.850267766	0.704563337	0.680918375	0.731878932	0.635937461	0.349947979	0.441341935	0.53282945	0.512686816	0.421070708	0.393994114	0.489790366	0.514558258	0.481583444	0.309029299	0.320641781
0.48220991	0.470127074	0.319195264	0.44997862	0.572322854	0.369475529	0.565567335	0.489557868	0.343118154	0.688796659	0.59312533	0.581984589	0.436631529	0.619269432	0.464214037	0.35728404	0.215042412	0.396541704	0.341812919	0.504208074	0.491388305	0.417279667	0.526418884	0.38794379	0.295151802	0.418048986	0.471321112	0.381172287	0.730733851	0.689171827	0.715542743	0.67443507	0.650179635	0.248260066	0.851920186	0.72511276	0.72180273	0.777635707	0.651735769	0.379456146	0.403644377	0.48594306	0.454568278	0.395970516	0.39794206	0.471024413	0.471131546	0.528573351	0.281588662	0.359734504
0.483167535	0.474060443	0.317808538	0.473406913	0.566640024	0.372087137	0.547549743	0.468788622	0.336061038	0.638296113	0.482487089	0.515357929	0.382352242	0.567917579	0.456610367	0.377057029	0.220248086	0.382420474	0.337707894	0.495996738	0.440457653	0.401724229	0.470856857	0.327233795	0.26480201	0.390037666	0.407775205	0.354475543	0.642457296	0.574718896	0.611014913	0.640362947	0.673974183	0.23054345	0.82701464	0.753835354	0.723688071	0.753207259	0.647614103	0.421123756	0.369357825	0.464247366	0.389843072	0.365028651	0.399445294	0.449853729	0.437263204	0.585293536	0.268532564	0.389155252
0.485472191	0.473227985	0.300912669	0.500439889	0.529882241	0.37135219	0.522356732	0.452373285	0.324867629	0.571673052	0.406466179	0.464986016	0.342087161	0.515939683	0.430219502	0.391031224	0.246947746	0.383092417	0.342924943	0.468471405	0.399968705	0.428953954	0.437066292	0.293557069	0.233905442	0.363789268	0.363035108	0.336762107	0.552345049	0.456317464	0.516503853	0.611609056	0.691613116	0.214911711	0.792979244	0.777590608	0.693062464	0.665470721	0.619449314	0.465063616	0.348263455	0.473133367	0.337829839	0.337042252	0.391948351	0.42324726	0.411927201	0.618548022	0.255855076	0.389631565
0.484926012	0.471950623	0.282420762	0.526815719	0.485812064	0.368436356	0.494049172	0.434957654	0.308245257	0.507322085	0.372945656	0.43307219	0.321126595	0.463730288	0.387692888	0.385648429	0.283846333	0.397200619	0.353311399	0.430579761	0.374131889	0.467348375	0.423130143	0.301711093	0.218860052	0.341238226	0.336030967	0.317253702	0.48050242	0.370523525	0.455143988	0.600351447	0.687054758	0.212589837	0.759914446	0.77987742	0.641664523	0.552238883	0.569861612	0.499247755	0.340954475	0.49899463	0.309526506	0.325364048	0.377159761	0.390717926	0.389437261	0.611560867	0.23146393	0.362882109
0.484892466	0.476781471	0.282987707	0.545592711	0.457367586	0.362714129	0.470774153	0.413997525	0.29101819	0.453343283	0.370899846	0.413089339	0.317110738	0.413002701	0.339956919	0.365552019	0.322844037	0.419919822	0.363578093	0.391707509	0.362269802	0.481509379	0.418739287	0.341174314	0.227503049	0.320550088	0.320186794	0.292085907	0.433130121	0.330653438	0.427136989	0.600461367	0.650880748	0.229625706	0.726516318	0.750487383	0.579508619	0.450204985	0.516893993	0.514284311	0.337661058	0.514008075	0.303637406	0.337218755	0.36557328	0.368879842	0.371658155	0.572604316	0.197082104	0.323268664
0.492236145	0.492069379	0.31338076	0.548003144	0.451376573	0.353714563	0.459843957	0.396029473	0.283803356	0.417202475	0.378931188	0.399735127	0.322540388	0.369708188	0.291856493	0.332957414	0.355045807	0.447506482	0.371079328	0.362536345	0.359523	0.465764409	0.411594594	0.382053777	0.255033041	0.302613246	0.309170057	0.268816051	0.407188277	0.323840694	0.417111481	0.593714707	0.594159455	0.259542573	0.685137496	0.692758213	0.513781331	0.380135241	0.467940509	0.505125019	0.328297133	0.512323523	0.309172724	0.369121331	0.372414384	0.37737056	0.370301214	0.529908259	0.17821976	0.297071958
0.51230687	0.516173772	0.363737274	0.527854217	0.456416914	0.342066907	0.463635756	0.396185178	0.291806227	0.403839204	0.376536467	0.385624871	0.32364129	0.338154909	0.252095188	0.297820279	0.378097277	0.47734961	0.376099341	0.357200965	0.359502638	0.425238275	0.395136259	0.394693641	0.286032499	0.297169983	0.299312459	0.265190532	0.388262053	0.328665972	0.408980496	0.56492386	0.532930792	0.290615572	0.631502553	0.624005779	0.454621857	0.348276261	0.430936046	0.471512504	0.310488073	0.49057077	0.311946446	0.419536917	0.409673002	0.427089721	0.396374634	0.515598983	0.203525254	0.305854398
0.543942306	0.540547958	0.414149937	0.495141456	0.459243698	0.333289193	0.479033785	0.419220343	0.306073784	0.413809028	0.35959359	0.369278059	0.320002108	0.323022755	0.230871783	0.273767738	0.396465529	0.50671297	0.378901368	0.37436291	0.357786084	0.384123739	0.372147593	0.377034843	0.301533326	0.311994114	0.305624507	0.291371334	0.366122053	0.324364053	0.396982773	0.520911101	0.482909398	0.305936625	0.57165431	0.567658855	0.406101312	0.352894047	0.413997929	0.427019988	0.289815543	0.465163507	0.3181463	0.481702047	0.477574189	0.506954497	0.454044972	0.547471835	0.279849036	0.3558539
0.576958876	0.552715165	0.436198101	0.454242881	0.444356859	0.337032377	0.500650503	0.463997341	0.318987721	0.43947836	0.348084725	0.356273907	0.318120147	0.334026586	0.230024243	0.270957448	0.417281437	0.531299943	0.376706264	0.40987671	0.353246404	0.380337179	0.349296657	0.335702772	0.287899635	0.351886699	0.340257737	0.351389224	0.341824116	0.305419838	0.384641965	0.472033697	0.456982146	0.29990487	0.519725558	0.54408864	0.384095675	0.378919442	0.425539735	0.380591247	0.284884785	0.461603754	0.339369759	0.539623064	0.560346848	0.599740249	0.539825697	0.618554642	0.395761395	0.432249692
0.596260932	0.542323441	0.417754542	0.416450215	0.413553953	0.365798985	0.525398355	0.521990127	0.323594205	0.468898577	0.366136335	0.362289529	0.325039739	0.363432365	0.250580846	0.283170997	0.444017292	0.551600842	0.364092042	0.459028964	0.34980348	0.420959194	0.335549082	0.289789374	0.254726719	0.416238893	0.405643401	0.435201632	0.342341679	0.288240997	0.382395663	0.443382285	0.458706303	0.273460257	0.491607958	0.559077289	0.405950365	0.419168462	0.453602872	0.340460155	0.312827015	0.495612701	0.384575929	0.575497038	0.629939484	0.67516095	0.63469646	0.700052335	0.522316811	0.513649281
0.59057	0.516936634	0.367749321	0.402542354	0.396174923	0.427056675	0.554946039	0.578458796	0.312528147	0.489922566	0.422588824	0.389383447	0.345681637	0.394842003	0.289310554	0.308352541	0.471970984	0.566722199	0.337586439	0.514250879	0.352976822	0.479876336	0.33873531	0.260849712	0.209612501	0.493175376	0.490553137	0.521297827	0.38468222	0.301971643	0.392139637	0.451739084	0.480806042	0.232843599	0.494496613	0.601957735	0.480407118	0.481182044	0.494134949	0.315547788	0.374379901	0.555878214	0.452006929	0.576219081	0.657413341	0.707913806	0.70956744	0.755890221	0.615788575	0.573410832
0.561077198	0.481298866	0.303215453	0.427139068	0.424677543	0.518511341	0.593951921	0.617236978	0.289052472	0.49550304	0.508897198	0.436907821	0.381644439	0.415713817	0.333101749	0.33355652	0.488840612	0.573428194	0.303001933	0.562374385	0.364243276	0.530342973	0.364951207	0.26102008	0.166597682	0.558393526	0.572483082	0.579733365	0.472097106	0.35130843	0.404619853	0.494181381	0.509151942	0.19326099	0.521193221	0.651225315	0.597049125	0.573480482	0.54089629	0.31228814	0.456846441	0.62354109	0.524873824	0.538701712	0.627060428	0.688367455	0.739869325	0.760847305	0.643932223	0.592480999
0.522483613	0.446665903	0.251584579	0.48250285	0.507502737	0.622912937	0.64490168	0.632613409	0.266845911	0.485997323	0.603921778	0.498035054	0.431622696	0.419091612	0.369298502	0.347645314	0.480768569	0.567251991	0.272432204	0.595288874	0.379971904	0.554518607	0.401869183	0.285016897	0.148255745	0.588748085	0.615753559	0.591606389	0.587873863	0.424009074	0.407665876	0.542882688	0.535023837	0.177628354	0.554889974	0.685847741	0.738744055	0.692342953	0.587285812	0.330027926	0.541067201	0.67290328	0.578648094	0.474483012	0.548544836	0.62596639	0.716468631	0.712594674	0.600015074	0.564869522
0.490066834	0.426188179	0.2469582	0.56080899	0.633468285	0.712209509	0.702962156	0.62959755	0.258446728	0.462827847	0.677179087	0.561874128	0.48864075	0.398561226	0.392069794	0.347145681	0.440769769	0.545236108	0.263925174	0.612133147	0.394117375	0.545201563	0.439051919	0.320063969	0.171172814	0.572915797	0.604385734	0.556425465	0.701255616	0.495800507	0.399676201	0.577764638	0.555390843	0.201989347	0.580125536	0.693017229	0.872135044	0.820177572	0.62523698	0.360652801	0.601387447	0.686434336	0.59309831	0.407839928	0.456773821	0.543938489	0.649500831	0.631585597	0.504145414	0.497600842
0.477914241	0.436819325	0.2958291	0.644429124	0.767742344	0.759361555	0.754709299	0.618823312	0.275119915	0.441681446	0.707011717	0.610481493	0.544918614	0.366932733	0.395507053	0.334920954	0.374615939	0.508795046	0.289361114	0.618177602	0.400715534	0.527505114	0.469944353	0.353697244	0.221748846	0.51742597	0.543914031	0.490644159	0.76473996	0.539577684	0.390310387	0.580557841	0.572463824	0.260050313	0.589614726	0.674307757	0.965488087	0.931800729	0.654948599	0.391823494	0.623540983	0.666230028	0.562998019	0.3552498	0.379166826	0.46816121	0.562959508	0.550670039	0.392074455	0.421397935
0.487431358	0.467651028	0.369831713	0.706698632	0.858782763	0.748374731	0.782440491	0.608962807	0.315455474	0.43433007	0.695265884	0.636235374	0.592123681	0.33787158	0.389012003	0.31911852	0.301727027	0.464937249	0.344864041	0.620859912	0.398926714	0.53464314	0.491238617	0.379102448	0.285591642	0.444375308	0.458962531	0.418565689	0.752496574	0.537265626	0.401685579	0.551364839	0.582477724	0.335002266	0.587092722	0.641752943	1	0.998564328	0.678404447	0.411599944	0.611998515	0.630622099	0.500843682	0.331496378	0.343719544	0.416250875	0.482965424	0.495145193	0.29814475	0.35204324
0.505778589	0.507228286	0.438733706	0.728699749	0.869964382	0.6803869	0.77228422	0.601564494	0.359442704	0.443297602	0.659924781	0.638290659	0.621499287	0.331781255	0.388256448	0.313838222	0.243291532	0.424826972	0.407547498	0.624953046	0.396161163	0.583379224	0.497961912	0.395973028	0.342338489	0.38143225	0.381106161	0.360683705	0.672250686	0.501055797	0.454057921	0.508219477	0.587308146	0.401829975	0.583172454	0.609964381	0.974812112	1	0.694830192	0.414465493	0.580772062	0.601305139	0.429946625	0.3376246	0.355915742	0.392512731	0.427048559	0.473995385	0.241362897	0.301060658
0.515018206	0.540314983	0.476686765	0.706191515	0.796686433	0.57318463	0.721674491	0.591374086	0.387345131	0.462437468	0.622725583	0.620783822	0.625162784	0.353686202	0.402321519	0.325412111	0.217575493	0.39787546	0.449505384	0.62946217	0.403655576	0.659576116	0.49795052	0.398204713	0.367365997	0.348982007	0.333661135	0.325513602	0.557644571	0.45925508	0.549688303	0.47133733	0.586514149	0.434512026	0.585753884	0.58848722	0.903992299	0.933317729	0.698711014	0.396103931	0.543794833	0.589662653	0.372257948	0.357716757	0.393973042	0.388119646	0.399068033	0.478942595	0.22082298	0.275899301
0.511578528	0.555734698	0.465461605	0.650057458	0.667439777	0.466850343	0.641727058	0.571456848	0.391574148	0.48257551	0.596627086	0.589811525	0.598882004	0.396972932	0.428730503	0.349313105	0.229113853	0.393734631	0.448805241	0.628038535	0.429559776	0.724249973	0.496830134	0.390812603	0.348317186	0.350992498	0.321814035	0.309459953	0.451737885	0.438636893	0.666689589	0.455189798	0.577537416	0.413694933	0.594082524	0.578499924	0.808224384	0.815653954	0.682364509	0.368283094	0.508024239	0.591002631	0.338298106	0.372652776	0.418867265	0.388978164	0.389729416	0.493499592	0.221029946	0.281640734
0.494938592	0.543557177	0.411803853	0.580300956	0.539217795	0.382079808	0.560388381	0.539306597	0.374113767	0.498146369	0.580550844	0.551017121	0.545243981	0.447488499	0.455216501	0.373482386	0.26779114	0.412664628	0.404443243	0.612768309	0.472599185	0.737022317	0.495689157	0.379472086	0.29649619	0.374303308	0.333249927	0.303705656	0.384861537	0.448580132	0.767021533	0.460508553	0.559937704	0.35306022	0.599706201	0.574861018	0.7063274	0.677717772	0.641829578	0.344723342	0.472895882	0.589782963	0.325475015	0.374265845	0.424577646	0.383821678	0.386216445	0.499087047	0.224788141	0.300200421
0.478134717	0.512451701	0.351087629	0.516784447	0.44423611	0.331380342	0.496604152	0.499641233	0.352403801	0.510232815	0.563572163	0.508754044	0.474993684	0.495505228	0.46686327	0.385671945	0.31306934	0.4472899	0.338458412	0.579216905	0.520436942	0.682067172	0.492179195	0.36914155	0.239182193	0.396551069	0.348169221	0.297944267	0.367243549	0.476639378	0.814679794	0.476882177	0.538303025	0.285084224	0.593232462	0.571206059	0.610787722	0.551876457	0.58208759	0.335177004	0.435130311	0.571555263	0.323977911	0.357612849	0.402631965	0.369788371	0.380021429	0.488547557	0.223020797	0.324311861
0.477747658	0.480334135	0.319428883	0.471397261	0.397601919	0.316814988	0.459480189	0.462006575	0.351661175	0.524024941	0.534676054	0.466594703	0.404747969	0.52608903	0.454304409	0.380217467	0.347906574	0.485137415	0.284470398	0.529809519	0.55438478	0.579552426	0.483500008	0.364755956	0.206052157	0.39836945	0.352168367	0.287667447	0.383418045	0.497695083	0.79356021	0.48968635	0.520942263	0.244615704	0.571721779	0.564372804	0.528222644	0.460392182	0.517464256	0.341139239	0.394489665	0.539283988	0.323473825	0.330103183	0.362132875	0.352184459	0.370043587	0.466197931	0.212086215	0.345318407
0.499410815	0.46288981	0.333941431	0.445856094	0.393623253	0.330603773	0.4480562	0.434961953	0.381224955	0.542740543	0.49123259	0.428197476	0.351178885	0.536578787	0.418402247	0.36038099	0.360894951	0.515168245	0.268822614	0.473575259	0.558402287	0.474773263	0.4688661	0.370436102	0.213754751	0.377388501	0.34420363	0.275506094	0.4064809	0.490341976	0.714639853	0.492788171	0.514815851	0.250972728	0.541325232	0.55556747	0.462877163	0.40917031	0.465918225	0.353596747	0.356074188	0.501722766	0.319490763	0.30833677	0.324904237	0.341302416	0.360507089	0.443347705	0.195510812	0.355198736
0.530203207	0.465196972	0.384406177	0.43442696	0.412550197	0.34698788	0.453301564	0.421011915	0.428103581	0.562728305	0.441053511	0.39758559	0.321127203	0.52981394	0.369251935	0.335420604	0.351688625	0.525758926	0.295653674	0.42457868	0.527624015	0.411694083	0.449965	0.386669776	0.257052253	0.342396458	0.335390691	0.274653981	0.414601069	0.450072311	0.608812014	0.48657029	0.520336781	0.298286895	0.513411631	0.548324279	0.417678865	0.389362815	0.440097219	0.361547315	0.326982169	0.471217563	0.314098972	0.307514334	0.331719997	0.364113193	0.357772021	0.429710048	0.180257866	0.348926708
0.553021011	0.480033207	0.440663237	0.428615856	0.422488012	0.358169841	0.456526634	0.415939064	0.464938253	0.573862075	0.397655348	0.376759878	0.315206616	0.510822931	0.320804071	0.314818504	0.327582839	0.51410969	0.345272185	0.39012864	0.471663731	0.407816516	0.429666269	0.407721235	0.311801044	0.306530881	0.340311222	0.294778849	0.404106744	0.391430568	0.510431943	0.47642333	0.530224678	0.35954908	0.497188958	0.545485972	0.394833019	0.385183598	0.440678344	0.360832477	0.310658352	0.457343915	0.311298157	0.344721043	0.384648825	0.420321169	0.369088535	0.452352531	0.17087828	0.333315857
0.552840158	0.493578647	0.47083934	0.423246354	0.420987638	0.359392688	0.452508857	0.412996545	0.467621228	0.5656861	0.368990604	0.365798169	0.326557483	0.484353166	0.284677016	0.303534093	0.297908375	0.484692918	0.387011456	0.371793117	0.410732465	0.446335366	0.41042291	0.422460078	0.348453215	0.286407975	0.366966556	0.337812671	0.382511357	0.338612681	0.441682774	0.467552056	0.533924451	0.402118854	0.494237827	0.5476784	0.395076265	0.383402957	0.45655169	0.353217118	0.308196638	0.460778311	0.311888689	0.409594675	0.47338227	0.494759996	0.396769718	0.514030361	0.17531511	0.325431207
0.529093062	0.494737923	0.459357452	0.418353744	0.413413742	0.351348426	0.45043116	0.406614957	0.431342235	0.535493068	0.356843984	0.363322298	0.341745666	0.454460173	0.266552599	0.300965965	0.26958913	0.447583085	0.398413443	0.36647054	0.363143445	0.490037733	0.393634964	0.419691452	0.3484695	0.300618316	0.411786446	0.39906481	0.367424649	0.311086219	0.406241727	0.462012539	0.52500013	0.405764097	0.498756506	0.554106173	0.413605373	0.379573338	0.472165737	0.342815791	0.317790096	0.467777808	0.313771487	0.480518631	0.576053616	0.565018394	0.431912008	0.603198443	0.206834189	0.345057364
0.489385802	0.482189223	0.414220584	0.416628799	0.413199532	0.338361892	0.462338477	0.400300897	0.374483907	0.492606281	0.356957374	0.366440028	0.35073573	0.425458059	0.266320189	0.303501583	0.246103874	0.415193955	0.378324231	0.372842097	0.342338802	0.507048987	0.380076839	0.395332487	0.314003492	0.342783796	0.462256383	0.469706654	0.371468655	0.313298257	0.393984265	0.459660686	0.506366253	0.372726565	0.502959887	0.5643947	0.441057081	0.378154546	0.477509992	0.33602418	0.334008773	0.470021992	0.313838506	0.534857835	0.669001964	0.611315418	0.466454471	0.70111632	0.264857716	0.403914765
0.452888529	0.464865501	0.359922053	0.424965068	0.430627123	0.334204759	0.495264757	0.407699585	0.327428953	0.45513333	0.370219303	0.37405573	0.354708262	0.402449443	0.280568521	0.30813163	0.229274716	0.398382125	0.34537486	0.388719187	0.352322978	0.490971729	0.370447103	0.356439006	0.265064127	0.399506197	0.504546382	0.53277962	0.392625051	0.334228024	0.391468517	0.46104295	0.489265562	0.324075533	0.503260336	0.579357751	0.467932969	0.387145866	0.474118703	0.338571742	0.354641528	0.466800856	0.31550717	0.553637107	0.717462049	0.606116395	0.496503474	0.787987082	0.341497871	0.496814237
0.45963121	0.455851008	0.321234802	0.440963936	0.462477009	0.353113198	0.548432248	0.436722216	0.313228403	0.440285225	0.391711909	0.385435641	0.358010654	0.390158037	0.304900274	0.31423557	0.22133425	0.402940026	0.323083163	0.41411794	0.381523572	0.46224676	0.365108629	0.31840403	0.226039495	0.458286276	0.5305351	0.573475824	0.417147703	0.355995412	0.390348958	0.468667263	0.486079811	0.285021469	0.502424938	0.599651237	0.487486262	0.410777902	0.472839485	0.347716336	0.381488464	0.469567439	0.323077345	0.524405368	0.713298638	0.556778588	0.516950484	0.827921929	0.421864396	0.599940447
0.515476256	0.463872338	0.308533116	0.459057843	0.49880238	0.3978005	0.613475158	0.485990459	0.332755468	0.453901247	0.420489459	0.398360314	0.365577622	0.390426828	0.334469001	0.322424114	0.224935493	0.427477403	0.322033141	0.449032665	0.412927924	0.450693499	0.363110099	0.296177026	0.210258734	0.50554805	0.539706397	0.58511166	0.430421663	0.365336632	0.389278218	0.484789553	0.501568304	0.268763748	0.506147197	0.623386943	0.496291951	0.444755014	0.484619775	0.357533675	0.412316325	0.486868112	0.34066512	0.465561034	0.666265104	0.488273766	0.523595771	0.811473221	0.479933359	0.678471588
0.600189698	0.487962329	0.313855338	0.475227317	0.528809403	0.459200435	0.673281494	0.544617865	0.364469348	0.48594836	0.454396664	0.411290454	0.381664099	0.400209293	0.36318481	0.331826368	0.24084989	0.463520701	0.331902154	0.489960086	0.435379725	0.472137349	0.363504014	0.29497852	0.212694482	0.523666644	0.535554125	0.566369669	0.425316478	0.360750846	0.38996352	0.507353693	0.528701412	0.269382429	0.516918208	0.645128482	0.495849768	0.477003944	0.510592338	0.364523731	0.438429013	0.516892165	0.367682223	0.403662375	0.595191761	0.429998846	0.518999353	0.747552851	0.489855924	0.701020842
0.687747763	0.518597615	0.319609785	0.49127796	0.541618037	0.520822158	0.714411648	0.592556113	0.379517495	0.515448831	0.487868824	0.423676331	0.403728774	0.411970008	0.383485112	0.33852258	0.265365564	0.498157353	0.334187349	0.525343831	0.442340139	0.515903915	0.363164623	0.307099569	0.215713504	0.511088655	0.520254533	0.520999659	0.408440933	0.351643455	0.39240499	0.528021579	0.552500998	0.268416557	0.530319546	0.657982695	0.489453314	0.493693519	0.538708524	0.369146636	0.449338096	0.548481682	0.397305509	0.360711041	0.519329401	0.402759263	0.503824781	0.657508558	0.448559039	0.654382117
0.752998561	0.54420992	0.313395563	0.509930119	0.533999521	0.557821978	0.734646737	0.607509898	0.362545447	0.522435218	0.505154212	0.433105982	0.423699863	0.41692872	0.388213811	0.33698262	0.290051206	0.518648353	0.316836077	0.541542818	0.432067302	0.55209717	0.359466566	0.317646816	0.20807007	0.473838212	0.492450157	0.457630772	0.399038914	0.35109474	0.393368849	0.535193958	0.55984078	0.255863739	0.537094418	0.658039545	0.480141131	0.487156839	0.550074151	0.37138371	0.435762318	0.567254497	0.415882955	0.34548705	0.452892143	0.410803833	0.478464568	0.568246857	0.370871989	0.551131103
0.763825285	0.558414942	0.298356132	0.542279448	0.515520381	0.552496499	0.741281096	0.583646425	0.324139923	0.50303566	0.499115115	0.438908626	0.432838082	0.409520253	0.374224401	0.328650404	0.305005552	0.517406251	0.277133808	0.532500541	0.412085094	0.553443022	0.353507681	0.315849721	0.186583333	0.422955045	0.450269844	0.389203998	0.417496432	0.367420562	0.389474905	0.522895793	0.548696975	0.228559612	0.531842042	0.64802954	0.470300839	0.46102017	0.53294105	0.374286605	0.39772418	0.5595378	0.416842696	0.352586165	0.403827228	0.44225908	0.446172414	0.503571258	0.285018329	0.433427239
0.72617073	0.562987271	0.29152375	0.594003211	0.498170329	0.508068464	0.744950541	0.531376214	0.295614408	0.467861058	0.47098361	0.442883059	0.426963237	0.390307442	0.345341884	0.314015216	0.304050671	0.495177976	0.244819359	0.500413178	0.391123809	0.515946816	0.351987222	0.303538883	0.170484255	0.371530672	0.398783835	0.330860153	0.473450651	0.399519425	0.382707048	0.497257328	0.530156918	0.207706077	0.51668759	0.636815248	0.462541958	0.429172363	0.495615943	0.378439137	0.349356564	0.530266428	0.405204846	0.368330486	0.375024757	0.476794027	0.414465131	0.476388262	0.218980698	0.334844545
0.665389388	0.564731349	0.310852069	0.658214892	0.490279812	0.444212534	0.75127124	0.471491081	0.308216173	0.434971889	0.430795235	0.445609689	0.408750988	0.368804949	0.311979761	0.298088597	0.288536339	0.460732729	0.256808986	0.456134039	0.375645427	0.46316103	0.360374717	0.294794089	0.185260309	0.328042693	0.341604014	0.295773825	0.558786382	0.437846451	0.381558227	0.46713822	0.521085111	0.220792411	0.498372475	0.633872317	0.460137377	0.408612655	0.450929753	0.381482106	0.315590672	0.502618289	0.397520289	0.379346635	0.36557328	0.495899502	0.392751112	0.484676107	0.193835577	0.285372818
0.611185731	0.568793058	0.359685691	0.71502078	0.493339295	0.388287058	0.755736352	0.42388498	0.369621673	0.42414989	0.391229781	0.445979621	0.385837694	0.351643022	0.286571015	0.290309649	0.26694787	0.426881302	0.326070839	0.413751797	0.36850059	0.430312619	0.380753705	0.305254699	0.243232713	0.304229567	0.304240114	0.290123787	0.649242507	0.469272933	0.392765393	0.448028188	0.531852601	0.281495809	0.487314812	0.641769967	0.465657538	0.409877786	0.424855717	0.380560992	0.320751118	0.503114851	0.41314148	0.37905126	0.371172345	0.490589472	0.387146713	0.513254077	0.20902585	0.293344138
0.581879465	0.573551673	0.419837308	0.739585853	0.502917497	0.36236043	0.745597124	0.400561433	0.453577761	0.441387725	0.362532288	0.441759835	0.366191657	0.34317463	0.276925531	0.296842791	0.25015511	0.404575666	0.428829164	0.384722163	0.369441383	0.439037557	0.408112362	0.338499392	0.325978142	0.301853291	0.301721893	0.309857294	0.713966244	0.482462208	0.414199572	0.450032725	0.557504213	0.370519806	0.489667777	0.652037287	0.47824523	0.430541023	0.433857861	0.375900126	0.374832088	0.54463371	0.461326155	0.369384364	0.384719865	0.46358107	0.396031614	0.541265875	0.245988403	0.340338882
0.576929874	0.571154451	0.459324205	0.715293762	0.512431687	0.372953252	0.708278958	0.399551859	0.511217299	0.472265972	0.352364954	0.431117205	0.353836741	0.342885856	0.281571681	0.311623854	0.245129728	0.398047484	0.523165026	0.374239413	0.376472818	0.480786123	0.431012931	0.379485992	0.399405119	0.315679575	0.335803337	0.341775217	0.728578152	0.471302401	0.433214436	0.467854645	0.579134883	0.454100345	0.500687591	0.648532632	0.491822537	0.455956397	0.4726438	0.372719748	0.465862234	0.615946136	0.532549328	0.358181473	0.398542821	0.426359841	0.410006067	0.552553948	0.278625067	0.385535865
0.581242988	0.553665738	0.451182408	0.644788025	0.517215613	0.409196005	0.628865996	0.407361216	0.504312722	0.495330968	0.355568495	0.409517478	0.347182696	0.345433052	0.290461662	0.32861339	0.251152125	0.403565854	0.55395383	0.373701299	0.387156002	0.521606538	0.436616562	0.401689508	0.421779087	0.335437038	0.389448592	0.369367381	0.68583359	0.43603807	0.440690443	0.482959781	0.576482219	0.48848706	0.503557273	0.62796381	0.496173509	0.464249384	0.513491961	0.379682607	0.564008113	0.685769907	0.600768924	0.354607637	0.408236172	0.393823314	0.41399449	0.544128413	0.287452768	0.402280289
0.577554028	0.52120293	0.402746888	0.551889887	0.516647059	0.450353028	0.534214637	0.411666777	0.441911227	0.496573214	0.361490224	0.384567948	0.340281366	0.330814578	0.293755973	0.34165405	0.260966259	0.412439921	0.501377199	0.370532673	0.399489255	0.526238997	0.421003042	0.391416865	0.375095419	0.353696551	0.444661727	0.380848018	0.599179561	0.390473321	0.426929183	0.485896725	0.550402401	0.451423768	0.486485586	0.589344153	0.477401698	0.435324124	0.536489568	0.404308948	0.636157751	0.720310564	0.636724091	0.365151652	0.415892622	0.379276568	0.404532835	0.528109973	0.264404934	0.374238587
0.558564323	0.484349515	0.332348199	0.471936982	0.513521331	0.478095497	0.451378877	0.410344275	0.340758699	0.473291061	0.364961889	0.363129968	0.324893054	0.295909544	0.268371012	0.346666243	0.265997283	0.416411246	0.395399163	0.354863028	0.412306487	0.487665594	0.39413705	0.351179968	0.286788038	0.35974731	0.467109404	0.374948708	0.497620225	0.344160687	0.393161178	0.473010789	0.506798458	0.362519215	0.457479454	0.542643947	0.424446578	0.359773954	0.527824203	0.44782662	0.662904949	0.704043061	0.624784199	0.391337504	0.429703739	0.390976783	0.385214913	0.525300881	0.222886851	0.311247304
0.531216524	0.457394432	0.277660431	0.434652747	0.511414623	0.485995743	0.408678377	0.409567947	0.255907661	0.438917368	0.369675931	0.351373323	0.308189545	0.263381754	0.232970903	0.346098607	0.261934394	0.412111419	0.283014635	0.336519521	0.425098573	0.430572641	0.376500113	0.298198256	0.196288431	0.353212141	0.449654287	0.36076738	0.413939633	0.306766418	0.364602787	0.455979667	0.471304432	0.264298851	0.434870303	0.517641109	0.365182584	0.28246765	0.496007726	0.502439898	0.647708644	0.650359617	0.572629481	0.428945975	0.458665742	0.429856778	0.368271478	0.552873622	0.185070947	0.248629807
0.510873155	0.452238856	0.272596515	0.448468885	0.511697099	0.480488844	0.420941699	0.41933575	0.243421484	0.414277916	0.380280245	0.352475257	0.293898827	0.243475302	0.201043298	0.346366411	0.250744845	0.405377484	0.231072491	0.321255364	0.437130156	0.40307428	0.387822881	0.269644485	0.156912104	0.339555977	0.402882886	0.351291505	0.371122383	0.292054561	0.373124084	0.455488059	0.470776045	0.209347245	0.438875372	0.538466889	0.317199681	0.227796434	0.466255037	0.552761469	0.61236564	0.594305706	0.506836913	0.468234986	0.504631738	0.487903904	0.366617663	0.612349281	0.1657471	0.211940651
0.509727197	0.468115657	0.321827593	0.49525316	0.511882114	0.473112948	0.492437209	0.445442776	0.314810727	0.413746406	0.403658784	0.369298907	0.286784891	0.242959933	0.186888883	0.351494542	0.239060522	0.399625483	0.271357912	0.32011223	0.446089288	0.44137133	0.433819995	0.289208307	0.193144777	0.326113703	0.350711271	0.354257122	0.372774271	0.306585008	0.424721098	0.484873665	0.511323228	0.224291907	0.482360874	0.596748094	0.296099335	0.214800639	0.462910243	0.581008523	0.581429684	0.570860479	0.456334465	0.495351009	0.55679753	0.547917762	0.38756107	0.684813876	0.168636777	0.216240498
0.527396384	0.494188653	0.385078851	0.539237505	0.50631919	0.469736476	0.579675794	0.480934501	0.417037671	0.435700683	0.438248177	0.390685127	0.290255512	0.270921121	0.193642587	0.358224403	0.237534874	0.403233359	0.372833287	0.337221675	0.447196405	0.540872473	0.499287374	0.341118685	0.28194921	0.317564349	0.315996942	0.366157859	0.402030959	0.337365936	0.50145536	0.535165702	0.563506712	0.292241522	0.556288473	0.667966948	0.310462689	0.249515506	0.491406236	0.573793151	0.565521099	0.592004629	0.434039139	0.503697883	0.593496827	0.586561937	0.418749297	0.737271013	0.185148742	0.256089122
0.550136557	0.511558197	0.429740209	0.559516528	0.495763067	0.464780545	0.642767774	0.508212759	0.501151596	0.463532114	0.471022177	0.40654136	0.306818386	0.319723643	0.230457463	0.362634955	0.241101847	0.410841021	0.460213551	0.368418929	0.445111918	0.65002347	0.553232299	0.398468153	0.357068633	0.313890663	0.309951368	0.373796535	0.435280888	0.36903539	0.567963619	0.579652995	0.606579788	0.357422711	0.622991061	0.718527168	0.358041923	0.324141813	0.532491863	0.536218473	0.554691199	0.637569614	0.430421811	0.489642458	0.592364623	0.592974991	0.442141319	0.741738738	0.199615489	0.306105359
0.559676515	0.502113743	0.420469879	0.53236039	0.473763142	0.453569978	0.651889357	0.509662223	0.515706016	0.477247405	0.483623036	0.409901179	0.324878358	0.357795873	0.266320189	0.351412059	0.241228202	0.414410738	0.491027083	0.391869265	0.433811643	0.70589668	0.567896916	0.421255958	0.376545502	0.31225963	0.321814035	0.366901256	0.448526181	0.385089902	0.584281335	0.591663222	0.608698669	0.376370751	0.645087636	0.72041115	0.398918537	0.383919843	0.554829637	0.47448678	0.53048125	0.67840018	0.428383557	0.445124499	0.544507422	0.55905853	0.442367404	0.693986157	0.201982039	0.33288073
0.545391031	0.472411403	0.358560155	0.472550233	0.443903967	0.419788136	0.603402054	0.480753689	0.448108172	0.46772474	0.464869929	0.400070829	0.341161188	0.373173416	0.285405109	0.324741002	0.233211975	0.407258528	0.429523193	0.397942992	0.405277372	0.666305644	0.528392949	0.381628127	0.316234583	0.311476313	0.334565509	0.338607802	0.426810968	0.372500919	0.53228143	0.553285111	0.560449628	0.32593417	0.608562904	0.662828303	0.415014246	0.40857169	0.535898182	0.403402962	0.474085979	0.66827708	0.398198768	0.385125539	0.464528208	0.484762469	0.418553185	0.600745293	0.198206488	0.328604603
0.513509226	0.44878136	0.291167899	0.421330017	0.419560535	0.372234226	0.524219971	0.437067077	0.345722418	0.444996994	0.421459489	0.383900823	0.356973169	0.366216342	0.283508752	0.298762509	0.222607998	0.397782073	0.319361547	0.388895516	0.370825483	0.549093231	0.452027876	0.311283217	0.218432183	0.315576078	0.337138337	0.302732799	0.386773799	0.338248853	0.44292661	0.488195961	0.497282792	0.244173628	0.538655747	0.581596226	0.406610668	0.398996143	0.483931188	0.34904971	0.394021175	0.603595394	0.345809303	0.341550387	0.389571661	0.405005661	0.38845571	0.506493144	0.20542518	0.308214048
0.485565463	0.461277898	0.28924344	0.42420555	0.418339251	0.339331037	0.461206978	0.409672593	0.295614408	0.43433007	0.378996718	0.373385838	0.378441992	0.349773016	0.271885727	0.299797643	0.219136462	0.396560195	0.255430973	0.380560342	0.350080496	0.430375155	0.379900134	0.284999804	0.172700265	0.333321883	0.334904546	0.286499023	0.364176157	0.311086219	0.385789112	0.453157293	0.479011651	0.21260344	0.494237827	0.538569656	0.396726883	0.378154546	0.439348206	0.335786927	0.325554128	0.519456907	0.307011908	0.342236709	0.365546304	0.367056731	0.381027624	0.465218533	0.242261406	0.303038679
0.487128296	0.532489669	0.404387625	0.494894738	0.448441539	0.358270386	0.459843957	0.430084719	0.379533826	0.461828931	0.370881501	0.380435772	0.413181795	0.342040911	0.271243664	0.34568622	0.245789666	0.426193382	0.335057221	0.395184392	0.352761695	0.407816516	0.357140403	0.371245238	0.27236977	0.37299626	0.348331208	0.317495178	0.392019194	0.330025447	0.435726239	0.512682247	0.550031786	0.31569405	0.540700211	0.590970824	0.421632007	0.379095618	0.455468126	0.36975763	0.315590672	0.473447823	0.329889241	0.406395843	0.426336835	0.400035199	0.420588427	0.513497817	0.317257757	0.344492732
0.532641708	0.669937254	0.655083683	0.638381798	0.518670673	0.446717863	0.542148003	0.512589865	0.62818114	0.537903155	0.420233801	0.411192287	0.46504118	0.356026137	0.298963577	0.447142047	0.31610287	0.501302845	0.591604834	0.448804797	0.391410923	0.545473194	0.405754689	0.61593934	0.557247534	0.43533826	0.3997585	0.404240888	0.488737604	0.423590006	0.629174733	0.698603163	0.731803859	0.587534632	0.714644671	0.752685898	0.511151389	0.426257578	0.566645319	0.452712254	0.393153033	0.502386047	0.440079733	0.545643341	0.576334988	0.515390725	0.51149492	0.650717841	0.422103009	0.446354759
0.616041359	0.846424598	1	0.820504132	0.620031543	0.609412715	0.694755005	0.644054619	1	0.648634857	0.525125158	0.462666046	0.529998416	0.391732933	0.35718711	0.586718857	0.42320496	0.617166778	1	0.540460022	0.468700099	0.838062789	0.51852041	1	1	0.509410991	0.496397136	0.537552659	0.649837075	0.59064665	0.944736803	1	1	1	1	1	0.669257727	0.520445605	0.765741358	0.571545899	0.558163707	0.627857418	0.642223794	0.736346463	0.785914846	0.701052244	0.632772087	0.857665231	0.533555711	0.59520511
[truncated: 1,250 more columns]
