# Supplementary material for: Causality Analysis and Cell Network Modeling of Spatial Calcium Signaling Patterns in Liver Lobules
Source: Front Physiol. 2018 Oct 4;9:1377. doi: 10.3389/fphys.2018.01377 (PMC6180170; doi:10.3389/fphys.2018.01377)
Supplement: Supplementary file 1 [file Data_Sheet_1.ZIP › Vadigepalli-Supplementary-Data-Code/Fig5_data.txt]

Original ID	Time (sec)	Cell 637	Cell 638	Cell 687	Cell 636	Cell 639	Cell 641	Cell 677	Cell 643	Cell 644	Cell 678	Cell 679	Cell 681	Cell 682	Cell 683	Cell 696	Cell 689	Cell 690	Cell 691	Cell 680	Cell 692	Cell 695	Cell 713	Cell 714	Cell 693	Cell 707	Cell 708	Cell 716	Cell 717	Cell 741	Cell 742	Cell 816	Cell 745	Cell 729	Cell 726	Cell 730	Cell 727	Cell 728	Cell 731	Cell 734	Cell 787	Cell 733	Cell 737	Cell 762	Cell 715	Cell 743	Cell 755	Cell 746	Cell 754
Alias	Time (sec)	Cell 1	Cell 2	Cell 3	Cell 4	Cell 5	Cell 6	Cell 7	Cell 8	Cell 9	Cell 10	Cell 11	Cell 12	Cell 13	Cell 14	Cell 15	Cell 16	Cell 17	Cell 18	Cell 19	Cell 20	Cell 21	Cell 22	Cell 23	Cell 24	Cell 25	Cell 26	Cell 27	Cell 28	Cell 29	Cell 30	Cell 31	Cell 32	Cell 33	Cell 34	Cell 35	Cell 36	Cell 37	Cell 38	Cell 39	Cell 40	Cell 41	Cell 42	Cell 43	Cell 44	Cell 45	Cell 46	Cell 47	Cell 48
	4	0.232776674	0.211329293	0.188026381	0.224036073	0.294544894	0.219620955	0.232102716	0.256619456	0.230838954	0.145596929	0.19862846	0.249538658	0.255352208	0.275412878	0.262813868	0.252267111	0.135104576	0.185634872	0.215720464	0.21603738	0.202546443	0.251327678	0.31601442	0.203158538	0.140009307	0.211818816	0.305780614	0.290985277	0.466287554	0.376865744	0.201326594	0.269701089	0.197825659	0.268249797	0.203302912	0.209504	0.180692584	0.196093788	0.408777519	0.255963268	0.308379828	0.309994666	0.325683057	0.268401685	0.306954078	0.238025038	0.247247854	0.319580951
	8	0.585278721	0.521307508	0.608491632	0.59397612	0.607299034	0.596460361	0.674100329	0.618443775	0.598250051	0.390996336	0.52557999	0.622043015	0.603518324	0.674346653	0.668066644	0.618226021	0.569474104	0.641227894	0.546735366	0.604519516	0.570140511	0.629629711	0.518592199	0.621744269	0.581665447	0.618352019	0.549374033	0.576222689	0.727085474	0.616230472	0.438104992	0.476779927	0.61355584	0.700694777	0.573576849	0.635663944	0.597433524	0.572311563	0.58348227	0.618667409	0.683441387	0.728081827	0.653136048	0.624964921	0.504414428	0.437589926	0.475638638	0.494991505
	12	0.732266893	0.666588208	0.781481869	0.740157406	0.742576633	0.767268621	0.864476907	0.767977766	0.774415187	0.489064917	0.668065037	0.789070688	0.763488921	0.850038481	0.833428482	0.77474581	0.741178318	0.827801546	0.713183334	0.772616719	0.72695485	0.784448716	0.609271528	0.814634232	0.765816013	0.799507127	0.633983784	0.709863026	0.837233847	0.72155755	0.548125548	0.56525478	0.803840459	0.908119869	0.732708266	0.825834345	0.772956706	0.745003599	0.694900749	0.776247504	0.866223363	0.920308625	0.779835369	0.757897837	0.589183765	0.516944225	0.568262924	0.564868225
	16	0.722847802	0.683256319	0.772125829	0.724806307	0.737296188	0.768396037	0.857976578	0.751732782	0.758730481	0.48483965	0.674482973	0.782861073	0.77069938	0.855224208	0.816807973	0.783318673	0.727960686	0.818533138	0.736634755	0.778819632	0.730624378	0.774991779	0.597191761	0.834380207	0.759864401	0.809865216	0.609954273	0.708933829	0.834831933	0.726630083	0.561239632	0.562239635	0.830882327	0.937153508	0.737069059	0.843915788	0.768821432	0.770331661	0.736041737	0.783559179	0.892014849	0.926906933	0.759674073	0.738766695	0.586661492	0.507837485	0.556979882	0.555902614
	20	0.595383569	0.586137339	0.622833775	0.589039187	0.623344991	0.638753435	0.693765028	0.613690136	0.603207634	0.40409907	0.566830398	0.644433626	0.652121653	0.731155946	0.666423317	0.677132589	0.579913004	0.671773125	0.652112966	0.659088565	0.619918951	0.637906863	0.513081509	0.712137369	0.612800413	0.688957181	0.513791875	0.60327224	0.746854637	0.648869193	0.499239284	0.49059368	0.735635904	0.819069877	0.623183005	0.732465592	0.633511839	0.677414981	0.704138974	0.669097206	0.776128137	0.785087066	0.634348309	0.608748823	0.517017323	0.436146912	0.472410435	0.490111696
	24	0.420041961	0.425414328	0.416835354	0.406894666	0.464340665	0.45392997	0.463100546	0.432359713	0.404930012	0.290760491	0.401139106	0.453836226	0.472974061	0.555864964	0.467363588	0.519534381	0.382667672	0.480605686	0.523606002	0.484458347	0.461976411	0.447511604	0.407799851	0.52088841	0.413286567	0.510988431	0.397802944	0.454075808	0.621455362	0.530976233	0.40299865	0.394411674	0.588760929	0.634043999	0.458870442	0.56674445	0.453170872	0.526058026	0.6225995	0.495739289	0.582910417	0.583283743	0.474435695	0.438157886	0.418739257	0.342891673	0.36536587	0.404651638
	28	0.25941336	0.263076293	0.235046128	0.247073722	0.32409757	0.28862788	0.261119889	0.2739428	0.245240425	0.184473299	0.236962983	0.284292296	0.301533254	0.402177371	0.297132473	0.370691788	0.212586525	0.323231948	0.410671126	0.324277056	0.319637114	0.272851951	0.322233336	0.338525447	0.242210971	0.345951586	0.298236438	0.318896624	0.503844065	0.418809233	0.311134924	0.314774683	0.451447536	0.465486552	0.308897331	0.413417402	0.303757223	0.376539614	0.52787844	0.328813397	0.390726651	0.412275598	0.34194964	0.289720367	0.328024353	0.264241667	0.279895821	0.333349892
	32	0.211689849	0.211329293	0.211875901	0.224036073	0.294527582	0.243886724	0.235434404	0.240511151	0.187361198	0.160481785	0.192145429	0.235300522	0.245785894	0.381953146	0.271044507	0.344820089	0.200443434	0.319265749	0.380273501	0.2974473	0.296943265	0.24235889	0.301116735	0.297656365	0.227601551	0.307733133	0.290862648	0.265790456	0.468862866	0.392531143	0.286760089	0.311103324	0.430446741	0.446267706	0.282569421	0.38726048	0.298472975	0.341523405	0.475675289	0.287858383	0.33668953	0.399153729	0.331280776	0.27852058	0.299120363	0.253717709	0.275068307	0.325132091
	36	0.21094639	0.218731766	0.250180013	0.24953055	0.317949411	0.260439935	0.288006554	0.261113424	0.216294036	0.162536329	0.200762294	0.251218366	0.252135512	0.408040784	0.299617704	0.356970841	0.236800284	0.359273906	0.386462997	0.318548314	0.318078509	0.26801068	0.327102072	0.318266365	0.264371167	0.315479305	0.318632788	0.272883126	0.466287554	0.399907984	0.286512383	0.333961441	0.433016319	0.480035067	0.301603711	0.39282546	0.332428465	0.344852375	0.457482511	0.296425568	0.349056261	0.452499539	0.360683644	0.307762136	0.296973644	0.269252603	0.298931476	0.342458093
	40	0.237983926	0.266134458	0.310323551	0.289946052	0.363871159	0.305860673	0.369386513	0.29855547	0.279596684	0.177177536	0.242067319	0.296213867	0.293686009	0.442229496	0.343241604	0.382678773	0.280891923	0.397575739	0.398981004	0.355190771	0.352494323	0.314757347	0.374416361	0.368196363	0.308157224	0.340524927	0.357633547	0.317564447	0.480990992	0.420461895	0.296560993	0.358487231	0.430707516	0.521565749	0.336847517	0.400267358	0.357872154	0.362731022	0.468477238	0.330049061	0.39855032	0.517984279	0.394862931	0.344985769	0.310313727	0.291558524	0.325160866	0.367366391
	44	0.260806123	0.316954997	0.348233631	0.31181118	0.396002716	0.340486409	0.421351606	0.316417463	0.318613003	0.190786275	0.283893425	0.329972178	0.33219063	0.447754074	0.363665685	0.396222758	0.294831627	0.396354558	0.389559176	0.371701965	0.366314246	0.343670107	0.413029002	0.404131341	0.317893872	0.353021198	0.383751856	0.362765194	0.497193754	0.430269295	0.302953877	0.362061935	0.403942113	0.52462869	0.356278993	0.387236319	0.338607991	0.366370273	0.491252997	0.356946662	0.440607422	0.539048609	0.403613653	0.360231013	0.321385486	0.301255102	0.331225553	0.382028593
	48	0.26391211	0.339459355	0.340978097	0.301880663	0.394085782	0.340245672	0.411947243	0.306785984	0.314597646	0.196915679	0.304016985	0.33622283	0.343562558	0.412169544	0.346808472	0.386568278	0.266135993	0.347953308	0.350756771	0.350983094	0.342790913	0.339998368	0.43155318	0.397929535	0.281118523	0.339864776	0.392520633	0.385472333	0.508937269	0.41860018	0.300657691	0.338757534	0.356859058	0.473269455	0.344413999	0.355266605	0.276294806	0.340697981	0.507846334	0.357315591	0.444081199	0.493561524	0.380745761	0.343884828	0.321846729	0.290331975	0.31198215	0.379310028
	52	0.252610153	0.323338284	0.29548479	0.27088125	0.363076134	0.30646124	0.350421182	0.279496109	0.283381547	0.196020713	0.294707289	0.318988895	0.326098432	0.351767338	0.306673365	0.360685536	0.210980429	0.275203343	0.298784809	0.30165075	0.290199777	0.307242515	0.424778446	0.350362051	0.217792308	0.307958871	0.380934792	0.383908905	0.521064606	0.393972182	0.294147596	0.301673677	0.313293038	0.39018121	0.308491555	0.326625369	0.209786649	0.291977691	0.509436827	0.331504156	0.407802733	0.405858335	0.343768191	0.308720648	0.315978188	0.265589243	0.280525817	0.364976266
	56	0.239813098	0.282294463	0.238768256	0.241702407	0.326296811	0.260031977	0.275076428	0.251119284	0.236737374	0.190592777	0.26469055	0.295050671	0.292148518	0.297802268	0.268686163	0.335010274	0.159694531	0.213264206	0.260448382	0.248933503	0.234491585	0.270517609	0.405422262	0.286747947	0.16363084	0.274503684	0.361304554	0.357610768	0.541909885	0.376865744	0.290994532	0.273093921	0.29878851	0.319245959	0.270326098	0.326163456	0.18941698	0.241815966	0.498825956	0.295068311	0.357148698	0.318667206	0.32294169	0.277852532	0.310925717	0.243160184	0.257609027	0.351468257
	60	0.232776674	0.242754534	0.198681342	0.232050225	0.308499882	0.22230721	0.229324813	0.242384659	0.205046066	0.181308631	0.231249497	0.283701787	0.262807441	0.275412878	0.257389131	0.32262986	0.136119202	0.186707497	0.254052055	0.217254326	0.202546443	0.253393948	0.389339183	0.239426002	0.145880723	0.253397099	0.347578802	0.323125982	0.573947901	0.384810925	0.294181899	0.269701089	0.321958623	0.295591537	0.250823979	0.361860003	0.243438733	0.212832771	0.485501617	0.266444101	0.324970616	0.270734244	0.337151684	0.268401685	0.310301208	0.238025038	0.257509929	0.34825487
	64	0.23750592	0.226650556	0.188026381	0.243493431	0.320076116	0.211948299	0.23374299	0.258908569	0.203718854	0.167774588	0.207879646	0.289651302	0.252788314	0.288980633	0.27494459	0.324991842	0.144264382	0.196373489	0.277072797	0.21603738	0.206455051	0.263461362	0.383711674	0.228548058	0.167289232	0.247231288	0.346561426	0.296404034	0.609260161	0.419976735	0.298936462	0.29240316	0.367708185	0.323302379	0.257225384	0.41738418	0.357906527	0.215228455	0.477457099	0.255963268	0.329886621	0.291470971	0.383197303	0.281686284	0.315617325	0.25480286	0.279374331	0.355374956
	68	0.250599663	0.238955556	0.200609	0.263065986	0.351795687	0.227293612	0.277130164	0.285212459	0.231121522	0.149959996	0.19862846	0.302466706	0.260179015	0.321969061	0.304868946	0.332639542	0.169213982	0.222587719	0.3082229	0.236643263	0.237673866	0.290405832	0.384156444	0.252116131	0.207054827	0.248725358	0.355799837	0.287014681	0.632895882	0.467200914	0.296096756	0.326661596	0.406171894	0.374578495	0.280118435	0.461156	0.482231403	0.241831636	0.475440805	0.262229175	0.365316272	0.354291791	0.438358123	0.305014136	0.32254743	0.284998443	0.308707791	0.364166587
	72	0.262506398	0.266927785	0.219219994	0.274614994	0.382281001	0.254298104	0.327673188	0.301085468	0.263366467	0.139924556	0.199587011	0.30676155	0.272190781	0.349439769	0.324810538	0.333086015	0.189444785	0.240481751	0.32188861	0.260520359	0.273503819	0.315770949	0.380336949	0.289625179	0.236118423	0.248394278	0.367029747	0.293557089	0.631774856	0.503298742	0.279271541	0.35229429	0.410821819	0.409468863	0.300698495	0.465359609	0.556605424	0.273500988	0.473237408	0.276106768	0.405122055	0.409427971	0.476139424	0.322105051	0.325272012	0.312046639	0.32706757	0.364228275
	76	0.265290842	0.290365859	0.228402431	0.270958815	0.392492806	0.276573048	0.355837787	0.300063072	0.281246586	0.151269302	0.204701471	0.294663721	0.27599638	0.353928389	0.324154174	0.319681609	0.191094292	0.236310982	0.305090628	0.271876543	0.29109694	0.326209511	0.365337356	0.315493458	0.235700641	0.24169429	0.372168147	0.308384137	0.603210342	0.511227175	0.250479835	0.356012273	0.373802368	0.402142601	0.302803792	0.422330861	0.544529309	0.290653413	0.463367903	0.287891874	0.421265849	0.426727493	0.478655614	0.324127542	0.321345944	0.321070426	0.323308548	0.351589612
	80	0.257897724	0.29544619	0.223294286	0.258326498	0.377653036	0.288414573	0.349344659	0.284696048	0.28236933	0.194458032	0.210986503	0.271635334	0.269310207	0.334521838	0.303168378	0.295566258	0.174935256	0.214478216	0.265895423	0.266408858	0.280296374	0.320934335	0.341934649	0.31348238	0.20732794	0.230644331	0.368044825	0.323569069	0.557517622	0.489890959	0.220154776	0.338814071	0.309171177	0.356334937	0.282217415	0.34817743	0.451407693	0.283704838	0.44395505	0.292377771	0.401876506	0.406284307	0.449355018	0.314095094	0.313474783	0.307642456	0.299547474	0.332411556
	84	0.246064188	0.283009493	0.209906236	0.250614548	0.349291535	0.286657285	0.319720786	0.265339541	0.276713867	0.268242889	0.219666428	0.252223699	0.255728844	0.304893721	0.277195487	0.270762347	0.152848444	0.192032988	0.228070711	0.251324305	0.250073883	0.309264971	0.321100146	0.283966608	0.169232276	0.221465869	0.357479586	0.335909163	0.513015014	0.453624072	0.201326594	0.314117635	0.246431619	0.300680212	0.248205597	0.27423434	0.327720675	0.256687907	0.421735218	0.28933349	0.358525541	0.356294588	0.408066363	0.302699339	0.307252818	0.280428176	0.269480804	0.319580951
	88	0.23791302	0.266315601	0.198450852	0.2582218	0.326728746	0.279026609	0.291449164	0.256619456	0.271514056	0.359016842	0.233254537	0.249538658	0.250169194	0.281701933	0.262813868	0.255137809	0.13782105	0.185634872	0.215720464	0.238054559	0.216746426	0.301504698	0.315348817	0.245270366	0.143017521	0.216979583	0.346753273	0.342245973	0.486427944	0.422279267	0.201733963	0.29847177	0.204615801	0.268249797	0.217250907	0.22380925	0.220518147	0.225530907	0.408777519	0.281451516	0.318659586	0.314772165	0.378527469	0.299542979	0.306954078	0.256079519	0.248399945	0.324269095
	92	0.238767014	0.260415501	0.195465912	0.279689564	0.323978233	0.273807498	0.284369336	0.263920202	0.274802928	0.437397939	0.251510042	0.266203858	0.260535222	0.274717422	0.26770717	0.252267111	0.135104576	0.200120835	0.237886478	0.233522352	0.198507881	0.300674071	0.329012587	0.211890462	0.140009307	0.215775301	0.341473417	0.341769858	0.484343203	0.408788852	0.218956881	0.301054971	0.191035516	0.274612067	0.203302912	0.205462452	0.166328322	0.201820796	0.414732187	0.272947298	0.308379828	0.309994666	0.375114923	0.306270606	0.312692569	0.24922931	0.246095762	0.34786567
	96	0.248535389	0.270720456	0.200160403	0.302008918	0.340654486	0.27449483	0.301480688	0.28130184	0.287455735	0.478462223	0.269692203	0.292881053	0.284493208	0.28217537	0.287962281	0.257972774	0.140242082	0.22578599	0.282826954	0.235933797	0.203393543	0.301189783	0.354852095	0.195675688	0.155720139	0.214003822	0.343352971	0.334613797	0.500478197	0.412249375	0.241647409	0.318424562	0.197137575	0.308820996	0.21027562	0.209842349	0.169878504	0.191736564	0.439609315	0.264042453	0.336415019	0.342745217	0.396319546	0.316017772	0.320954629	0.263387298	0.261926679	0.379582821
	100	0.262752113	0.288631901	0.206574677	0.309214418	0.362586797	0.278536166	0.328811918	0.297124902	0.302038555	0.47078812	0.28052877	0.314832606	0.310924313	0.294724791	0.313407431	0.263843415	0.145017004	0.245238564	0.325304098	0.237913211	0.226430875	0.294885931	0.377989288	0.198168039	0.17475671	0.209581562	0.349511992	0.321846633	0.519918652	0.420516236	0.256005175	0.337311287	0.207369204	0.342415719	0.230618619	0.21934941	0.206223671	0.193572405	0.472071657	0.254954238	0.388967989	0.389267913	0.427656639	0.318825946	0.327801433	0.288210845	0.286688795	0.40156259
	104	0.275836096	0.297192355	0.208894659	0.293330651	0.371497893	0.280156669	0.346087323	0.302637911	0.311542682	0.421541296	0.278476964	0.321519134	0.32995074	0.303194172	0.336023881	0.266030056	0.144506953	0.244598264	0.341978725	0.235559506	0.252696428	0.279177773	0.385296516	0.212278964	0.18171082	0.205408195	0.354332318	0.30664391	0.527494366	0.419892679	0.253412473	0.343205042	0.208397505	0.349405447	0.250087487	0.220829268	0.231182262	0.200358035	0.49491658	0.249086005	0.438156052	0.419585592	0.450990909	0.309871871	0.33203064	0.305074957	0.308083488	0.398858635
	108	0.284067029	0.284886615	0.205537851	0.26396572	0.357383664	0.274849846	0.340300887	0.297400846	0.316274914	0.351830117	0.263231861	0.312613329	0.333326765	0.305577741	0.354915751	0.262641038	0.138596768	0.228009276	0.325157422	0.22662055	0.272245275	0.260701025	0.372626294	0.224345668	0.174274439	0.208231071	0.352585149	0.294434471	0.518399969	0.407152873	0.237779674	0.329514977	0.201902096	0.327218124	0.255579812	0.213573812	0.233946649	0.202291851	0.494855797	0.251259584	0.45848986	0.417999956	0.454172426	0.293654246	0.33574622	0.302537757	0.318597231	0.377041083
	112	0.286557851	0.255925907	0.199252981	0.232495991	0.327706367	0.262542055	0.313343067	0.288312094	0.323514713	0.285313404	0.24006225	0.296815526	0.325575234	0.305822855	0.374531714	0.256070022	0.13232784	0.202589845	0.286558548	0.214795247	0.280726722	0.251327678	0.347849446	0.23195126	0.157355007	0.22100089	0.342113916	0.290985277	0.498107909	0.386809514	0.217111545	0.304506818	0.195467258	0.288733516	0.246121874	0.206072559	0.213795796	0.198626085	0.47078318	0.261831699	0.441298812	0.392256474	0.435810645	0.27606771	0.34192397	0.280887042	0.316662392	0.342499021
	116	0.284260708	0.219557188	0.193994915	0.215249952	0.29864023	0.247681606	0.27951963	0.283749288	0.340515871	0.236982736	0.218390874	0.285040324	0.31783706	0.308878736	0.398184327	0.250584087	0.131216891	0.180235992	0.249288375	0.207607926	0.281963536	0.259319637	0.32516389	0.23473608	0.140375879	0.239457943	0.327803345	0.299165279	0.474269501	0.37265872	0.200168188	0.277398052	0.196617638	0.261068373	0.226261797	0.207436608	0.183244866	0.192253226	0.435543636	0.278670014	0.398758159	0.366283105	0.403724307	0.263972943	0.351009236	0.247041212	0.306033085	0.308994011
	120	0.278370417	0.197517231	0.192214325	0.21963438	0.290449558	0.236530595	0.255601832	0.287496378	0.366643525	0.208486216	0.203480972	0.283171961	0.31998321	0.31501872	0.422448746	0.249326094	0.135769349	0.172481019	0.233538446	0.21024711	0.282870549	0.282201525	0.31601442	0.235419996	0.131844188	0.253769141	0.31294352	0.316567541	0.457128546	0.376173303	0.19379407	0.261819634	0.205452682	0.264052308	0.204106039	0.218664894	0.163609961	0.189091982	0.4091166	0.295043398	0.355811463	0.362547244	0.369400081	0.261190699	0.359455026	0.216473531	0.292220478	0.29052797
	124	0.26953409	0.205157994	0.192588751	0.240595015	0.313111057	0.233486428	0.250441521	0.296708892	0.391129614	0.191818069	0.196739686	0.289297897	0.333825303	0.318520922	0.437257206	0.249606191	0.140923142	0.181734549	0.245036524	0.218456907	0.286906146	0.306913421	0.32231556	0.236786488	0.134237833	0.255045054	0.302278727	0.336042135	0.455537372	0.398776653	0.198389643	0.26514807	0.2148918	0.297800408	0.191740833	0.229400713	0.169297344	0.19297965	0.408437038	0.302142965	0.33552606	0.386490479	0.34240599	0.265356622	0.361698213	0.204721933	0.279293318	0.29402204
	128	0.258245138	0.239899569	0.192037418	0.26121387	0.359842128	0.238582062	0.260659939	0.304831409	0.398743295	0.177803237	0.196026891	0.296669347	0.351988471	0.313981753	0.432106773	0.250016453	0.141968874	0.195166911	0.273028629	0.227219958	0.290879512	0.31765138	0.336288234	0.23952828	0.140034577	0.242776931	0.300368652	0.349403073	0.468302722	0.428764532	0.206202698	0.284848944	0.219445454	0.340389088	0.197283116	0.235208259	0.191765536	0.20337676	0.438324519	0.29514551	0.34685542	0.423307996	0.327627641	0.269636515	0.354389236	0.223609788	0.268882837	0.314928692
	132	0.247337733	0.281082102	0.188735634	0.274195019	0.408193807	0.247457232	0.274347735	0.30675555	0.379763125	0.163143545	0.197911902	0.299467514	0.363114738	0.301205376	0.404023167	0.249929995	0.137272818	0.205383205	0.298280551	0.231879871	0.28728851	0.307104877	0.346669366	0.24257651	0.143413769	0.221296702	0.308904975	0.352284856	0.487773996	0.453662525	0.212750831	0.307867266	0.213539062	0.372166367	0.216308166	0.229338326	0.216896699	0.21615592	0.489395944	0.278084402	0.381585161	0.448520815	0.325683057	0.272966211	0.339739907	0.261095287	0.261335351	0.343948583
	136	0.238410291	0.311718242	0.184081721	0.275991243	0.436926666	0.253687393	0.27944477	0.30218648	0.337312162	0.151468849	0.19884657	0.296783915	0.3597931	0.28297897	0.36127145	0.250105016	0.129842362	0.207951777	0.305424212	0.230575559	0.270355952	0.28296262	0.346783168	0.244917935	0.142488613	0.202995508	0.323548213	0.346988491	0.508390763	0.462680795	0.218304145	0.327462305	0.199289018	0.380140931	0.241127669	0.213453911	0.233832405	0.226363629	0.54347059	0.262156593	0.421154368	0.44455439	0.334835886	0.277299318	0.32517081	0.300388749	0.257446306	0.369695868
	140	0.233126142	0.315852717	0.182453502	0.27170067	0.431854495	0.252165103	0.270929128	0.29491172	0.286750338	0.148462355	0.200205564	0.292061096	0.343811589	0.268147718	0.319541679	0.251852953	0.126813579	0.20417736	0.291758676	0.225109741	0.244789009	0.256707636	0.338859204	0.246834221	0.138923721	0.200787504	0.342437233	0.341142144	0.52390117	0.454556441	0.225124249	0.337740649	0.185816792	0.368110495	0.263673262	0.197344851	0.236256091	0.229461467	0.583607409	0.258861427	0.448101329	0.412002064	0.352384047	0.28549262	0.318943032	0.325669635	0.259032214	0.384886954
	144	0.232301427	0.293163695	0.187091317	0.269543725	0.395855425	0.243517905	0.255658522	0.28894436	0.247225691	0.155369874	0.203925456	0.288986758	0.325159536	0.266173549	0.2926086	0.255517481	0.132029315	0.196797787	0.267445481	0.220164201	0.217603257	0.24332227	0.331743455	0.24925776	0.136622724	0.214339256	0.362102753	0.342642991	0.528221343	0.436940603	0.236514611	0.338972026	0.183416226	0.351700402	0.274183294	0.194765083	0.226352897	0.224568458	0.601310173	0.272077823	0.454746011	0.368416157	0.374701446	0.298682678	0.324444131	0.330179115	0.267709799	0.388338276
	148	0.23511024	0.258358178	0.197118915	0.273559233	0.349507481	0.231209462	0.240897299	0.284836251	0.230838954	0.166133194	0.210177897	0.287573719	0.315414485	0.275709551	0.283577895	0.259610483	0.142200507	0.189865763	0.247771957	0.219099569	0.198856675	0.247699582	0.333826476	0.251785744	0.137864056	0.229504837	0.377704745	0.353958125	0.519521554	0.420502495	0.253271977	0.335719605	0.192965544	0.345762995	0.267234971	0.204938937	0.212885766	0.21556844	0.598452603	0.294353101	0.444398659	0.336128959	0.39667195	0.314192424	0.337105968	0.308971655	0.282770093	0.375901229
	152	0.237691316	0.231821325	0.207850499	0.279910771	0.308398627	0.219856292	0.232987785	0.280641197	0.236445479	0.17200354	0.216461401	0.283847151	0.319910626	0.287929986	0.285942647	0.261468238	0.152232419	0.186171563	0.242985643	0.221759125	0.195829158	0.260999362	0.346358151	0.251278442	0.142061858	0.239425018	0.384789899	0.36962018	0.501905584	0.412116487	0.271624246	0.332472051	0.208881697	0.353750673	0.249559643	0.221213638	0.203825029	0.2073425	0.583020818	0.310300858	0.425745102	0.327762096	0.411932224	0.325913296	0.346483446	0.276164001	0.299883611	0.355183963
	156	0.2381995	0.227571487	0.213548449	0.279351508	0.284580815	0.214750531	0.233339519	0.27473644	0.251879193	0.169310376	0.218531213	0.275639642	0.333907197	0.295822384	0.289514883	0.259095589	0.156534539	0.186349465	0.252181659	0.224738494	0.206445679	0.270856832	0.362014261	0.245190565	0.146848676	0.236567768	0.379762428	0.378955364	0.481817838	0.411590042	0.284480646	0.330140749	0.220968429	0.366351337	0.228215231	0.232435973	0.200884603	0.202436309	0.562565091	0.310859051	0.405394536	0.339073591	0.414692991	0.327563265	0.345102335	0.24930889	0.311983472	0.334840928
	160	0.236081525	0.245716729	0.211625846	0.269806594	0.282099655	0.217446609	0.238277576	0.265149673	0.262667728	0.157309985	0.216883931	0.262903565	0.345325634	0.292937305	0.283574064	0.252869748	0.15025874	0.186436156	0.264575898	0.224271831	0.218582556	0.270022133	0.36983769	0.234574494	0.149135256	0.219854172	0.364039447	0.372722112	0.466211783	0.413493271	0.28523943	0.325690302	0.225524945	0.369570819	0.209997729	0.235423411	0.200924482	0.20113737	0.540070916	0.295173521	0.384105637	0.353315881	0.402508527	0.316553767	0.332520284	0.238025038	0.312304538	0.321421666
	164	0.232244232	0.273418142	0.204150506	0.251636551	0.293746733	0.22416978	0.239221072	0.254109248	0.261105298	0.142363399	0.211318873	0.249409422	0.342275659	0.27908209	0.266731964	0.245751373	0.136244733	0.185959224	0.266830861	0.21908902	0.226516214	0.256940604	0.363102217	0.219400345	0.147278613	0.199242111	0.343057626	0.34956392	0.462239901	0.412005793	0.271649877	0.314977914	0.219981179	0.355641166	0.200013709	0.22659151	0.200549516	0.202022543	0.514660905	0.2685916	0.361090326	0.355486759	0.378295059	0.299206477	0.31264812	0.240460507	0.29847369	0.319580951
	168	0.228475808	0.293031109	0.19530258	0.23015854	0.304042743	0.230747219	0.234308043	0.248159883	0.249711016	0.134786949	0.204296173	0.243287386	0.321697555	0.263557411	0.248426988	0.241657109	0.124127824	0.185591888	0.259412965	0.211801311	0.224910128	0.240713592	0.344803291	0.203766879	0.142649002	0.193558315	0.319598879	0.319746604	0.4727468	0.404891601	0.248530841	0.299166737	0.207746	0.328462309	0.199884553	0.211368923	0.195838565	0.202221458	0.485724775	0.244099502	0.337478278	0.343650113	0.351623443	0.281491146	0.297762124	0.247335107	0.277362256	0.332961593
	172	0.22635152	0.292041749	0.190012978	0.214448103	0.309452816	0.233404919	0.225575342	0.251462925	0.237353244	0.139224767	0.199557843	0.248455776	0.293583074	0.258178636	0.243085978	0.243162973	0.120667708	0.186087444	0.243077475	0.206793848	0.213744856	0.236429892	0.325151669	0.194476344	0.138132547	0.206532481	0.298713433	0.295326519	0.492939476	0.395518794	0.22536613	0.280779691	0.196747456	0.300156471	0.202333333	0.200402456	0.187060924	0.20008565	0.456524311	0.237504901	0.314635871	0.322959369	0.330638734	0.268890679	0.299709635	0.250100829	0.254685565	0.363882205
	176	0.226530894	0.27208448	0.190631366	0.211712897	0.310089357	0.229518201	0.219544825	0.260521354	0.231449498	0.148853851	0.199801643	0.259749603	0.267427705	0.266862321	0.254940379	0.249104498	0.126565176	0.187188903	0.224442059	0.20723476	0.199803977	0.245610264	0.315311652	0.19485821	0.135511657	0.23118305	0.29001389	0.287329805	0.513857262	0.388255005	0.208120233	0.266847487	0.193967351	0.283062793	0.203308371	0.201745305	0.178312762	0.196329373	0.43386328	0.249216838	0.299968717	0.305704713	0.322380758	0.264088886	0.318614048	0.247363932	0.24047659	0.411338534
	180	0.228936322	0.244203619	0.193524364	0.21708226	0.307404791	0.220812759	0.223414038	0.270107154	0.233611756	0.158355929	0.201085824	0.271019764	0.252236599	0.283083462	0.277517759	0.256040123	0.137856002	0.18745272	0.211490192	0.212869706	0.190492289	0.261594683	0.318846977	0.201138096	0.135190929	0.251567581	0.298379839	0.296792144	0.525939766	0.384735137	0.199834279	0.265291762	0.196521515	0.27954006	0.201452068	0.210374704	0.173088919	0.192219456	0.423629012	0.267598094	0.300790375	0.302201553	0.327329138	0.266024376	0.343324752	0.245299357	0.2422195	0.46871073
	184	0.232658618	0.218636171	0.193333067	0.224295789	0.304346907	0.211519157	0.239434171	0.276507936	0.238885289	0.160934893	0.200900925	0.273972793	0.250994377	0.298423812	0.296120672	0.259737711	0.146655686	0.185291586	0.208931375	0.220061882	0.186884817	0.276200222	0.328928407	0.209324705	0.136028939	0.260228358	0.320830349	0.313583015	0.521725604	0.383346215	0.199548579	0.27912885	0.199210815	0.282474989	0.197441154	0.219552614	0.170917343	0.188815629	0.4255129	0.281136059	0.314255373	0.311552165	0.33859184	0.267947014	0.361403303	0.25216958	0.260293855	0.523482898
	188	0.236831487	0.203316239	0.187938614	0.228311385	0.302653961	0.206058001	0.263774806	0.2744937	0.240152819	0.153440673	0.197284338	0.263086335	0.258056886	0.303431705	0.304439657	0.258023765	0.146503989	0.18049338	0.20826532	0.224092296	0.189945361	0.278735919	0.337904768	0.213547528	0.136608234	0.24932153	0.352243123	0.322609718	0.504172501	0.380874292	0.202312224	0.301634449	0.197863696	0.281179393	0.194986295	0.221619619	0.172251163	0.186628369	0.431333376	0.285508063	0.327913547	0.321308749	0.347614667	0.267777368	0.362014002	0.271201925	0.285109319	0.560422902
	192	0.240934652	0.201434286	0.178804887	0.227103485	0.301063269	0.208850275	0.28840429	0.263581872	0.234176941	0.139879273	0.190674271	0.242692064	0.261060198	0.291663025	0.293345018	0.251947164	0.136534976	0.17615412	0.206999195	0.222219839	0.197880682	0.263905777	0.336444585	0.209790426	0.136609533	0.22206968	0.382241656	0.319357812	0.480044516	0.374341481	0.202351326	0.32433818	0.191509799	0.270128487	0.198372847	0.213296976	0.176705526	0.187133111	0.435119001	0.275907761	0.335509539	0.322843092	0.349828208	0.266252018	0.347212816	0.297151076	0.310064325	0.567483704
	196	0.244257728	0.207696438	0.173533007	0.222920278	0.297853807	0.219120299	0.3029569	0.249831069	0.224648228	0.131786226	0.186615442	0.227102488	0.256628537	0.268170549	0.2665524	0.245666384	0.123953868	0.178062699	0.205616206	0.215494345	0.208455676	0.239598474	0.322518623	0.198834173	0.137353753	0.194175028	0.396509862	0.302464379	0.462235736	0.366352916	0.199524025	0.337925004	0.186201558	0.252563218	0.209155073	0.198240898	0.18346437	0.191984259	0.429540163	0.257044856	0.331140142	0.312999218	0.341672801	0.265721625	0.322444567	0.319168735	0.327536899	0.541594245
	200	0.245322172	0.215267584	0.180242466	0.220344369	0.293169641	0.231741417	0.299368607	0.241891152	0.219801151	0.136590957	0.191899165	0.230762532	0.247228752	0.253358524	0.241306146	0.244406934	0.121562158	0.189757569	0.208613597	0.208139178	0.220966382	0.226259236	0.304108332	0.188279873	0.139828953	0.189110507	0.385983672	0.282826541	0.462363318	0.366054721	0.196189146	0.337429443	0.190831219	0.245833033	0.225105342	0.19084587	0.191702641	0.202001573	0.414002022	0.241092077	0.314746553	0.296556332	0.326040503	0.267410998	0.299434246	0.328021117	0.334999589	0.490975023
	204	0.245091216	0.223289506	0.201555758	0.222614468	0.288980407	0.240509288	0.282319092	0.244550125	0.22484909	0.154731942	0.209233036	0.260285211	0.243264894	0.262207798	0.240160068	0.249997753	0.136982853	0.210107626	0.220263487	0.206408097	0.235761766	0.236474234	0.298469074	0.189866117	0.14324112	0.210233979	0.358785383	0.278594855	0.483998015	0.380139689	0.196456795	0.326084231	0.210362457	0.261728852	0.241077283	0.203251879	0.200188595	0.216430388	0.397106022	0.240777774	0.297353771	0.289014106	0.311517652	0.271114665	0.29182314	0.322457426	0.336339375	0.432172949
	208	0.242752783	0.232528792	0.232708046	0.228920067	0.28844675	0.241411565	0.258552129	0.25799928	0.23673657	0.17818605	0.234846506	0.308677667	0.252791218	0.296708673	0.263895561	0.259848274	0.167638504	0.233353814	0.241155338	0.212600586	0.250626708	0.270563294	0.310625872	0.209483869	0.147053366	0.249084985	0.324616325	0.298342975	0.517738918	0.408258563	0.202799661	0.313304596	0.242202504	0.297809102	0.249970838	0.23769861	0.206059713	0.232328435	0.394364673	0.254243021	0.295555299	0.302488154	0.307998591	0.274388135	0.302438811	0.309964589	0.338589333	0.382865256
	212	0.238246955	0.242879082	0.263742392	0.234696667	0.292716663	0.235439259	0.235817014	0.276145013	0.24756352	0.195441879	0.259619171	0.358976976	0.275395936	0.344064568	0.303107562	0.268895371	0.201912656	0.250650094	0.266619483	0.223242786	0.260389953	0.313354707	0.336493582	0.243246454	0.149156815	0.289305897	0.298892826	0.332811211	0.551516376	0.442323486	0.215106312	0.30869389	0.276808233	0.33769161	0.246380978	0.284531216	0.206380009	0.24349898	0.408157602	0.274297025	0.31190239	0.338121366	0.319976127	0.274435735	0.318779625	0.301042254	0.346511419	0.353963082
	216	0.232962438	0.253001107	0.281664646	0.234808598	0.299226885	0.226497074	0.221572135	0.290207171	0.251748378	0.196203717	0.27113023	0.390359907	0.301110321	0.382102855	0.337965571	0.272783697	0.224440001	0.253768356	0.287312732	0.231634496	0.258567476	0.342793231	0.361805932	0.279011889	0.147455185	0.312882422	0.295087175	0.365495525	0.571193477	0.469351204	0.231417779	0.315531621	0.299547833	0.360645621	0.234763681	0.326808921	0.20267666	0.243150218	0.432625041	0.289178656	0.336425873	0.385739433	0.344844961	0.270050697	0.330817043	0.300843874	0.358324004	0.345127784
	220	0.229377279	0.260308763	0.278560523	0.227415148	0.305491076	0.219792387	0.2210708	0.292825679	0.244119359	0.182738487	0.261892118	0.387689047	0.315407952	0.386845912	0.348126206	0.270510459	0.221693332	0.240776345	0.293406182	0.235654119	0.248029749	0.342204325	0.372590215	0.300882576	0.1422964	0.305041089	0.315199329	0.375846646	0.568170822	0.476608528	0.249111882	0.327858667	0.298922188	0.352631447	0.21866368	0.343230633	0.19474854	0.234670948	0.453952703	0.293420014	0.353655876	0.430179037	0.372272601	0.263488318	0.3326792	0.304229785	0.365460713	0.346066053
	224	0.227444193	0.262128667	0.256641383	0.215750424	0.307625658	0.218526831	0.22824983	0.285129762	0.227714959	0.161294891	0.239076444	0.352813373	0.311507839	0.36143435	0.333444859	0.264466237	0.198615045	0.220133515	0.281539849	0.231585567	0.227843218	0.314620735	0.364737081	0.296569529	0.136728072	0.27619119	0.342751553	0.362203995	0.543455693	0.461478885	0.265706765	0.333410836	0.274631181	0.319663751	0.203286033	0.323778576	0.184424805	0.218892913	0.459917218	0.284346924	0.356910229	0.454291375	0.389336737	0.260525193	0.323281611	0.301473406	0.357011132	0.347909899
	228	0.227991402	0.257421865	0.226611164	0.209169598	0.30309775	0.221865715	0.236886879	0.269654197	0.216961608	0.142039819	0.210536565	0.30609901	0.289245448	0.314391102	0.297949007	0.258094914	0.165875662	0.199579844	0.25758407	0.220885435	0.202802909	0.270707738	0.339175633	0.268621146	0.132718022	0.237632729	0.363624846	0.32639053	0.51179922	0.43297645	0.280714071	0.325501721	0.240396833	0.276573374	0.194055972	0.282630121	0.175351799	0.200101841	0.447742975	0.265292163	0.338356152	0.452340418	0.385404145	0.265762722	0.308610115	0.289160034	0.331342826	0.3433047
	232	0.230438061	0.24752926	0.201729907	0.21583845	0.29410668	0.224152579	0.242012204	0.253039787	0.224038413	0.135256164	0.190167035	0.265466443	0.257475591	0.266351812	0.258234495	0.254306585	0.136319971	0.185394336	0.232733227	0.209581905	0.184562177	0.234615336	0.308680336	0.231748379	0.132864713	0.204624439	0.36536102	0.283637597	0.483324528	0.406622869	0.294515358	0.304306441	0.207550996	0.250490032	0.195616737	0.235058854	0.171144849	0.18507173	0.421442223	0.245786411	0.30522801	0.431458268	0.364214923	0.279402365	0.301821138	0.26364991	0.295538429	0.330509608
	236	0.233151475	0.235255146	0.190934056	0.236314379	0.286121369	0.222180283	0.24221675	0.245353069	0.247670624	0.143231282	0.189406547	0.243850808	0.236908657	0.246252077	0.237192981	0.253819138	0.121417782	0.180242566	0.2163917	0.204915059	0.187105821	0.230824172	0.294235982	0.203871151	0.137459923	0.192413688	0.350938142	0.262781097	0.465399939	0.395659905	0.30641865	0.275038284	0.188743214	0.258757149	0.203843298	0.200776655	0.172262662	0.182207858	0.398119747	0.2401918	0.282370297	0.405049516	0.333947508	0.296943454	0.313326288	0.232030089	0.258006855	0.315015039
	240	0.234505506	0.225369349	0.194692639	0.263196623	0.283270789	0.216240583	0.237041291	0.252784934	0.277716127	0.155628092	0.20874979	0.242926542	0.244979095	0.267557715	0.24874193	0.253619092	0.125457844	0.182678961	0.212894743	0.20786768	0.207990443	0.262714106	0.306638265	0.198849844	0.144481938	0.205626945	0.325637857	0.282403753	0.46014589	0.403771829	0.313422851	0.25499942	0.19016832	0.293964619	0.216798329	0.195298245	0.179687215	0.189029764	0.396390629	0.251733668	0.292910625	0.383572693	0.313925196	0.31166568	0.343263154	0.213781647	0.232662634	0.305997493
	244	0.233922041	0.218810455	0.205545604	0.285736211	0.288261411	0.212065176	0.230688475	0.270753805	0.298443927	0.165032025	0.233108745	0.253633683	0.27697358	0.308851254	0.276220998	0.251563582	0.137230425	0.185500223	0.218550301	0.217242888	0.242083619	0.310040657	0.334368214	0.217400755	0.151169435	0.228346828	0.301300249	0.327806765	0.46474031	0.42347836	0.310765241	0.260897937	0.207390007	0.331254214	0.231159404	0.220071301	0.191539223	0.203731672	0.418957638	0.275731282	0.333290795	0.368778436	0.319162196	0.316056114	0.381625858	0.224012834	0.231935635	0.307238055
	248	0.232177887	0.21491863	0.212697676	0.293706645	0.299047733	0.215936339	0.229565076	0.295494309	0.298450445	0.167209809	0.250192012	0.261477326	0.317797698	0.349476617	0.305039671	0.248488746	0.147170017	0.186572142	0.225965822	0.228010681	0.276912522	0.354491521	0.363763096	0.245742857	0.155546655	0.250843463	0.29073495	0.379627296	0.468532521	0.440842172	0.294150534	0.293054831	0.225624671	0.352302664	0.242096998	0.255200766	0.203739949	0.220397368	0.447403334	0.304004997	0.388139199	0.355920828	0.348493809	0.307923817	0.4148918	0.257433308	0.25146519	0.316860355
	252	0.230775333	0.212622085	0.213543067	0.284849105	0.310470194	0.22966143	0.23687672	0.32109242	0.279441698	0.163143673	0.252834117	0.263016096	0.349081516	0.37018241	0.320783271	0.2468506	0.15126276	0.186557909	0.22892411	0.235154463	0.297156811	0.377682157	0.380967696	0.264747032	0.155916924	0.264093088	0.298515936	0.414713007	0.469417676	0.443389161	0.268347592	0.337543786	0.236559812	0.343936855	0.24352576	0.285506088	0.211102687	0.231337206	0.464122808	0.326021288	0.432159576	0.342993554	0.381904189	0.294238166	0.428410357	0.301294888	0.275087843	0.328309054
	256	0.230838903	0.211796612	0.206308816	0.266599237	0.317297006	0.24840224	0.247985823	0.338584361	0.248813405	0.155818634	0.240769088	0.258645231	0.352001745	0.360686727	0.316426203	0.248877544	0.150242952	0.187184215	0.225683533	0.238096151	0.290810814	0.369211889	0.37628188	0.264910867	0.15427155	0.263085315	0.310669241	0.410724717	0.467904363	0.430199194	0.239474359	0.375816494	0.237395749	0.316855167	0.238832265	0.296279086	0.211591799	0.233544704	0.462638051	0.329074112	0.439477037	0.326519556	0.399921718	0.280491602	0.414847222	0.335621256	0.288722018	0.33567921
	260	0.23233305	0.211237505	0.194407445	0.250157844	0.317145188	0.262561284	0.257344235	0.341417077	0.221300349	0.149266295	0.217819584	0.252490788	0.330113145	0.329721819	0.297206391	0.254532815	0.145340097	0.189462928	0.218649911	0.234879805	0.266180146	0.33553183	0.355183357	0.248939644	0.152031717	0.250766768	0.32071593	0.376068143	0.46587118	0.40848435	0.212748725	0.385300071	0.229201546	0.285242242	0.22800646	0.285409653	0.20569147	0.227066858	0.438449439	0.317099821	0.408264568	0.30922213	0.398113545	0.271504711	0.383374482	0.340127808	0.289715384	0.335840874
	264	0.234152806	0.212099815	0.184247017	0.24235184	0.311894225	0.264991055	0.260954847	0.327461165	0.211557382	0.146061152	0.194050823	0.249511391	0.293079404	0.291347541	0.27292084	0.26088835	0.139796401	0.192508337	0.213354568	0.226871506	0.234015439	0.29628615	0.329790997	0.223449863	0.14949804	0.230726414	0.323594617	0.325472623	0.464945816	0.386473026	0.194306476	0.364498129	0.215078514	0.264965381	0.213536152	0.259768011	0.194732308	0.214228483	0.403144295	0.294321703	0.355307917	0.298213895	0.371665866	0.268999408	0.346177792	0.316258733	0.274469247	0.326803223
	268	0.234996914	0.214336754	0.181713881	0.242376338	0.304217023	0.254834563	0.254078088	0.305575598	0.220401649	0.146360294	0.180864814	0.249779886	0.256782031	0.263053506	0.25566438	0.263607976	0.136359568	0.193946474	0.212512228	0.217823458	0.206903204	0.264426003	0.313308656	0.200504604	0.146401756	0.210002878	0.317049756	0.28214257	0.465364146	0.37210038	0.188788427	0.322472145	0.200683069	0.263251477	0.200243381	0.228048529	0.182629443	0.200562002	0.382537637	0.26832397	0.307160278	0.299283019	0.330899444	0.271099149	0.313859044	0.275152955	0.250055959	0.313745298
	272	0.234360047	0.216310674	0.183597008	0.245887863	0.297410737	0.234966688	0.238386282	0.281966686	0.234735506	0.146209397	0.181907934	0.250005247	0.236379599	0.256738808	0.252634069	0.25974047	0.135175171	0.191702992	0.214990167	0.211101814	0.194087889	0.24718655	0.311717509	0.190855062	0.142942618	0.196962727	0.305342105	0.26908494	0.466044158	0.369080614	0.191531575	0.275808025	0.191903357	0.275127091	0.19383872	0.201559593	0.174793278	0.19232255	0.39487235	0.248580796	0.290980065	0.306970744	0.296649776	0.271218194	0.294916842	0.235241809	0.23040779	0.309034943
	276	0.232898793	0.215801623	0.188016263	0.244280781	0.293608089	0.214530233	0.222265946	0.262133632	0.244595789	0.144784701	0.192325603	0.247854582	0.239618047	0.266850636	0.260234815	0.249984002	0.133674924	0.185856287	0.21805777	0.205914835	0.197272718	0.244391585	0.320176824	0.194804861	0.13823935	0.195930639	0.29722912	0.291703314	0.465682333	0.372343925	0.197354086	0.246801908	0.18799952	0.28197085	0.191541423	0.189813711	0.172226215	0.18903542	0.429298383	0.242897343	0.3123317	0.317744936	0.29421594	0.268527357	0.293159726	0.217876706	0.230301389	0.320230095
	280	0.231897839	0.211784028	0.191703423	0.233466006	0.291863642	0.204043973	0.214036276	0.250306048	0.245742619	0.143055342	0.20580652	0.243329214	0.251712898	0.278765235	0.267994141	0.238808537	0.131926263	0.179079163	0.2186467	0.20369049	0.203315478	0.24968056	0.327986796	0.20249913	0.133646543	0.204522139	0.296383919	0.326484847	0.463960119	0.375037618	0.20333799	0.251071256	0.186878976	0.277422067	0.194268757	0.19217043	0.174156187	0.188352529	0.466880617	0.244812463	0.345939851	0.325541339	0.317037664	0.264380921	0.30002468	0.230485968	0.243346543	0.347556346
	284	0.232241764	0.205621268	0.191812168	0.217489054	0.289632726	0.206768098	0.217118691	0.248306675	0.238381336	0.1425392	0.21511808	0.240446819	0.261787543	0.28562067	0.270844877	0.236177049	0.130907717	0.175138553	0.215546339	0.205879043	0.205256697	0.252834727	0.329230587	0.207941708	0.131276323	0.218303211	0.301783636	0.355177795	0.461920721	0.375211942	0.206605	0.276527412	0.188075882	0.263496654	0.200511428	0.20322154	0.17943782	0.189185517	0.484896847	0.250731462	0.365923264	0.325947336	0.353991481	0.261266233	0.307383745	0.255308384	0.259607756	0.385827871
	288	0.233679182	0.200623544	0.187481412	0.206724879	0.287907822	0.216483109	0.229306066	0.249197766	0.229320553	0.143841312	0.218409475	0.244026287	0.26553897	0.284420535	0.267427312	0.248013797	0.131505512	0.176346223	0.210187244	0.211985876	0.201190252	0.253149916	0.322919117	0.20710132	0.132112337	0.230107993	0.308904725	0.365021643	0.461241208	0.373802716	0.205606287	0.304471679	0.19143046	0.250092324	0.206837819	0.218626288	0.184869305	0.190243392	0.475550738	0.256639978	0.363498233	0.318015811	0.385838011	0.260978283	0.312075362	0.275036597	0.270140662	0.424867954
	292	0.234958899	0.201496515	0.180399714	0.2095484	0.289408467	0.226407027	0.241654149	0.25100136	0.227979509	0.145947278	0.212841332	0.255081225	0.26257042	0.276888954	0.260266337	0.273229768	0.13335845	0.181736332	0.206559021	0.219082736	0.193753809	0.251399695	0.313657399	0.200185082	0.135308694	0.235746592	0.312081543	0.351190193	0.4629063	0.374109274	0.200814162	0.320164271	0.196234474	0.250563044	0.209535395	0.232713133	0.18670706	0.190679518	0.439968821	0.258670029	0.334399592	0.306385148	0.397492431	0.263347555	0.31192353	0.279900752	0.269251364	0.450948565
	296	0.23476591	0.208950701	0.177096332	0.228610339	0.295573446	0.230597134	0.248646927	0.25374941	0.238197346	0.146906162	0.200581525	0.269616901	0.255663432	0.268918152	0.254058304	0.304740759	0.13470037	0.187399026	0.209093107	0.223560186	0.191056917	0.248349343	0.308513066	0.192521501	0.138574331	0.229424699	0.308299954	0.324009342	0.466191224	0.378831108	0.19506686	0.315413801	0.201818577	0.269054836	0.206590061	0.241252825	0.182818054	0.190644899	0.39530442	0.255233117	0.293736585	0.295613082	0.381866287	0.266408072	0.306981118	0.268347103	0.254667329	0.455289817
	300	0.232769118	0.219257621	0.18374345	0.257394001	0.305115383	0.228346089	0.245493426	0.257811873	0.253539323	0.145399523	0.188576197	0.280879758	0.250625025	0.266497884	0.254307826	0.333796264	0.133573831	0.188976883	0.219154603	0.224033971	0.198848519	0.245604081	0.30946081	0.193020327	0.140165321	0.212066946	0.299772302	0.297878378	0.469129914	0.388317518	0.19409268	0.295214732	0.208117304	0.298930463	0.198920279	0.241525068	0.174240325	0.191973261	0.373688479	0.248689788	0.271915116	0.289684929	0.351413333	0.267875902	0.302155003	0.248746522	0.234918475	0.436935893
	304	0.229979289	0.226851822	0.202683682	0.284603533	0.314267671	0.222144424	0.232293545	0.263323121	0.264049155	0.141950114	0.186818914	0.282407697	0.250579916	0.271253778	0.263247314	0.350860754	0.131187206	0.184770187	0.235095674	0.219125903	0.217036885	0.246905731	0.313699963	0.207213831	0.140688818	0.196305729	0.295993546	0.286868507	0.46958292	0.400394472	0.202100092	0.27313455	0.215895	0.328679021	0.193255076	0.235960946	0.168546568	0.196746468	0.401695084	0.246870351	0.292159308	0.28984816	0.329411526	0.267690054	0.304402502	0.235572125	0.230504335	0.402057228
	308	0.228403635	0.228398192	0.231003321	0.299724861	0.318535786	0.21886977	0.220926221	0.269580235	0.26374417	0.140387059	0.198088319	0.27315365	0.252838657	0.281615142	0.280352491	0.354212003	0.132299741	0.180244176	0.254057789	0.213032637	0.240270782	0.257456827	0.317733657	0.234999981	0.143213298	0.198840981	0.305742609	0.293064113	0.466763694	0.411094198	0.219855955	0.265826301	0.225665886	0.349810345	0.197911572	0.231079459	0.174615283	0.206765695	0.465047493	0.256749276	0.345039757	0.299535343	0.334526758	0.268308766	0.316915093	0.237589338	0.248635168	0.365716125
	312	0.229714525	0.224082457	0.261606225	0.298212903	0.315343498	0.223974885	0.225674686	0.274883025	0.252536839	0.144081395	0.222495889	0.25882706	0.254879703	0.295286846	0.304061153	0.349220046	0.142374279	0.183585473	0.27303657	0.2135066	0.261848956	0.282428332	0.320859347	0.271509837	0.151367718	0.226031839	0.332196681	0.30847376	0.463062571	0.41616548	0.244260131	0.27988726	0.238194236	0.360410262	0.218076933	0.23376069	0.197204803	0.222979227	0.53955659	0.280761633	0.411480843	0.319178891	0.368700857	0.273330824	0.338411977	0.251947467	0.283605301	0.335657896
	316	0.233579095	0.220038513	0.283430087	0.286809347	0.307595524	0.237574065	0.248408245	0.277790644	0.235039155	0.153714031	0.255177501	0.249022914	0.256858632	0.31188102	0.332254974	0.343541498	0.163832721	0.20024915	0.289722764	0.226679454	0.275201498	0.323619951	0.326669163	0.308800075	0.166746495	0.27520887	0.371210196	0.320987855	0.463284895	0.413456522	0.269174412	0.307316026	0.253512104	0.369292417	0.253158825	0.247316521	0.234207745	0.244556951	0.600682722	0.315400375	0.469057998	0.345315848	0.416107269	0.285125508	0.362479988	0.265487271	0.321149856	0.316166581
	320	0.238049353	0.223932841	0.288781709	0.278353204	0.30284167	0.254285091	0.282979055	0.279184061	0.222345346	0.166749732	0.287857655	0.250853454	0.262693148	0.331596135	0.360161122	0.341585396	0.19326623	0.228518395	0.303528713	0.251970763	0.279882004	0.374830419	0.33986421	0.337843221	0.186589239	0.332808897	0.413018918	0.325578718	0.471109932	0.404162559	0.286465572	0.329322839	0.270218728	0.387475429	0.296616146	0.269257689	0.277345258	0.267626032	0.628074961	0.352268481	0.500240985	0.374342112	0.453685127	0.303024699	0.378366588	0.268335911	0.345134826	0.309517018
	324	0.241036253	0.238916326	0.277351018	0.282859889	0.309175092	0.268209196	0.316090122	0.282554628	0.22429156	0.179014381	0.309352837	0.264279584	0.277194182	0.354072267	0.381520971	0.341856505	0.220240145	0.259125114	0.313797118	0.283731336	0.280221549	0.421085455	0.361791015	0.353854391	0.20383779	0.37750612	0.443825881	0.321936052	0.486971329	0.392611678	0.291504194	0.332867137	0.285417548	0.417786648	0.335207542	0.291878108	0.312542219	0.28651198	0.616458151	0.379521902	0.500136355	0.402650656	0.466144509	0.322416816	0.377582054	0.259015253	0.340528586	0.315263541
	328	0.241437846	0.260059229	0.256144636	0.300470221	0.329931099	0.276167071	0.331311378	0.291992521	0.240052908	0.185606879	0.31306115	0.28163779	0.300862378	0.37565833	0.388369638	0.338668855	0.231713885	0.276719301	0.318412999	0.309775102	0.280319674	0.444608067	0.386610982	0.356321561	0.210011208	0.390195618	0.454671127	0.317083599	0.507324595	0.38133596	0.28495076	0.315276578	0.295274405	0.45031813	0.355351741	0.305407313	0.328061454	0.294961967	0.58605747	0.389454227	0.485126269	0.421952858	0.455369944	0.336838674	0.359433796	0.242245963	0.310504988	0.325423382
	332	0.239516882	0.276038006	0.235650046	0.320666165	0.360312964	0.279548915	0.320008016	0.308431618	0.261250812	0.184818996	0.29916553	0.292769407	0.326567242	0.38817961	0.373334264	0.326729379	0.219344317	0.26987533	0.314170254	0.317393005	0.279364008	0.433391106	0.402705043	0.347129043	0.200286961	0.36609811	0.444327016	0.317924826	0.524920528	0.373446449	0.271749496	0.288159946	0.295959367	0.467346726	0.349174659	0.302226111	0.320278554	0.288258449	0.560632524	0.381017131	0.473919882	0.426412756	0.4378988	0.34090912	0.333630885	0.231124476	0.272426773	0.337258267
	336	0.237715078	0.275484444	0.224222915	0.32828353	0.38825716	0.281785662	0.289972456	0.326521545	0.279486813	0.17823185	0.273857775	0.290346619	0.341134289	0.381850929	0.342709637	0.305249872	0.192587345	0.245108249	0.298811591	0.300949419	0.271013287	0.388780101	0.399724399	0.328606722	0.181339214	0.316178426	0.418012769	0.325802981	0.531808817	0.372309156	0.257856792	0.269877821	0.284721128	0.454617087	0.317426146	0.281858185	0.294263223	0.266083508	0.551732643	0.35873814	0.473048572	0.415938596	0.432231574	0.332581138	0.311803301	0.23465428	0.247341001	0.347025257
	340	0.237410569	0.259818628	0.223802153	0.312726398	0.399546157	0.283877968	0.255471385	0.334988963	0.28648807	0.169050456	0.246093121	0.278482953	0.333535689	0.357535932	0.302649022	0.281950089	0.159910384	0.211853036	0.273771104	0.271539463	0.256418532	0.328367999	0.376733922	0.302887307	0.157807321	0.263726712	0.383493877	0.335451485	0.523744513	0.378373205	0.246645485	0.273113473	0.262835413	0.411317194	0.274105365	0.254386172	0.26017167	0.238219302	0.552748198	0.32934961	0.472717807	0.39374278	0.444771749	0.315143138	0.304094028	0.249438509	0.247247854	0.349575724
	344	0.238205238	0.23401672	0.229401861	0.281760259	0.385848832	0.281753875	0.230646819	0.328656506	0.279212756	0.161717588	0.223533309	0.262317838	0.30896152	0.321892138	0.262756628	0.262774183	0.132853536	0.183386634	0.247599175	0.237684937	0.233264867	0.274927227	0.345137321	0.272580927	0.136972286	0.224491849	0.351317788	0.338859018	0.505246893	0.387688415	0.237311187	0.295609987	0.237771069	0.351974285	0.231954459	0.226183456	0.227940572	0.210342834	0.546191833	0.300054426	0.45590116	0.365754707	0.464363437	0.296217866	0.310991716	0.261046308	0.267989413	0.344591633
	348	0.238087572	0.208341933	0.232665141	0.244179812	0.357057575	0.273064026	0.224585993	0.30713171	0.26237673	0.156006096	0.209656078	0.249016486	0.274004358	0.283897095	0.236974015	0.252062499	0.120556955	0.171269708	0.225220382	0.210563956	0.204769109	0.248475849	0.323017607	0.243017657	0.126559582	0.206499146	0.325461188	0.331201658	0.482231112	0.395969331	0.226850672	0.320454648	0.212760741	0.299035391	0.201010559	0.204276464	0.20347761	0.189551087	0.51867793	0.275954841	0.414054453	0.338941524	0.469697758	0.279416593	0.323310957	0.263091914	0.292335713	0.330208386
	352	0.235232954	0.197501967	0.227323419	0.215843726	0.320374015	0.256731576	0.235604881	0.273153335	0.244360815	0.150268554	0.20349052	0.243619873	0.245000918	0.256662173	0.243520387	0.25022512	0.125041593	0.17754332	0.211025535	0.199539616	0.180860064	0.253925251	0.323549936	0.219546233	0.130911975	0.207188889	0.306000937	0.314719144	0.463660062	0.398105423	0.213624797	0.328493942	0.192435254	0.269263004	0.190565498	0.195289255	0.188166353	0.183675463	0.472937981	0.258020631	0.357766716	0.318859856	0.444951339	0.267073927	0.330052043	0.24758404	0.301731101	0.313162236
	356	0.229047038	0.208606985	0.213928549	0.211605767	0.287413058	0.232753724	0.251601126	0.238771334	0.231609801	0.14379201	0.201866061	0.246494661	0.239421878	0.25504637	0.273706104	0.253832426	0.132436582	0.187792866	0.207691454	0.206478236	0.175267356	0.278163419	0.345106186	0.204952326	0.142838855	0.217627268	0.292806398	0.297958585	0.460195973	0.391548487	0.201336964	0.313770691	0.183914808	0.26690961	0.202492863	0.201275741	0.181068871	0.194241583	0.42465704	0.249869105	0.311776872	0.309266411	0.397493397	0.260176085	0.321742754	0.228176041	0.289846536	0.310087081
	360	0.224228717	0.231990203	0.198081457	0.234965698	0.271529229	0.208106402	0.263956834	0.222561672	0.22793915	0.138241565	0.201197383	0.249676026	0.259922306	0.274448308	0.312427234	0.255141681	0.135916596	0.192168536	0.213382	0.217510173	0.19321622	0.296170497	0.370711287	0.200091175	0.158691775	0.226250464	0.290539153	0.290985277	0.479619032	0.378838095	0.200410455	0.279264181	0.190681308	0.283218312	0.226072278	0.214884328	0.181441056	0.211121859	0.392940345	0.254340947	0.304563009	0.310722921	0.345076264	0.259930792	0.3012076	0.232523533	0.26972378	0.339812937
	364	0.227237877	0.256689025	0.187386044	0.269570155	0.281930584	0.198272751	0.271199539	0.239068388	0.232664752	0.13699621	0.199792871	0.250009386	0.285596282	0.299922599	0.341711557	0.252793635	0.134464238	0.186767997	0.220382128	0.225605755	0.227768926	0.29794592	0.378909215	0.202836691	0.173915269	0.232430188	0.303968941	0.299764726	0.521851976	0.373191412	0.223700355	0.254095264	0.206954662	0.304070864	0.251560107	0.232807716	0.189292182	0.228065649	0.39884512	0.269051253	0.343572592	0.321581447	0.316522608	0.26570945	0.292215395	0.288720435	0.269707985	0.412757051
	368	0.24115	0.27317912	0.18646263	0.302002799	0.307715042	0.211497929	0.275891026	0.27994775	0.241262241	0.143908343	0.198239519	0.247271958	0.299352344	0.317786436	0.347318916	0.248706212	0.134411465	0.180173059	0.226719177	0.228422407	0.263813479	0.277377433	0.36036977	0.207276081	0.183990763	0.237670107	0.33479646	0.323263894	0.585116911	0.393279329	0.278833438	0.273912907	0.227321866	0.318900579	0.270803605	0.250040692	0.203577736	0.238386518	0.433432234	0.28539695	0.408453078	0.338739677	0.32801477	0.280555665	0.324870613	0.405446318	0.319584573	0.532888478
	372	0.262961756	0.273814131	0.193116837	0.318141339	0.342294235	0.243161615	0.282537622	0.327706424	0.248599412	0.157999222	0.198030603	0.245543395	0.294489533	0.319441085	0.321727859	0.24638518	0.146259779	0.189367454	0.231748289	0.224530554	0.285060438	0.242798244	0.328219404	0.2082966	0.185552042	0.242779105	0.381312229	0.354822928	0.662111773	0.454199082	0.361953609	0.360661227	0.242520246	0.326233851	0.274870483	0.259969615	0.219802041	0.236118241	0.470263419	0.295499722	0.460239261	0.358326584	0.370741322	0.305773218	0.416119125	0.575392198	0.433842238	0.685641441
	376	0.28431689	0.259933799	0.200867184	0.309453343	0.376734937	0.281990712	0.291971205	0.360118732	0.251930099	0.173384926	0.199420802	0.24903705	0.267185036	0.303604781	0.281164082	0.248089946	0.17813601	0.22895952	0.234707628	0.216077591	0.281572857	0.215812763	0.315546606	0.204952711	0.178707875	0.245207937	0.43654218	0.386493491	0.739427869	0.557918076	0.455768412	0.50766887	0.245441438	0.328682016	0.262370494	0.257060841	0.229648479	0.225742179	0.484953359	0.293880914	0.466445584	0.37471595	0.410082077	0.33976203	0.566330278	0.762426746	0.600754361	0.838691947
	380	0.293849171	0.239624747	0.204218143	0.28330964	0.400996053	0.31235695	0.29905209	0.362037996	0.249426439	0.182476466	0.201444898	0.258583618	0.241232587	0.284904014	0.259365797	0.252417145	0.22944713	0.300867922	0.235114601	0.208557321	0.251699078	0.231395602	0.357243064	0.198901107	0.166532572	0.241946492	0.486709804	0.413279778	0.801733422	0.690525579	0.534063974	0.691379639	0.234926269	0.326889443	0.241996301	0.24434047	0.228765829	0.210865413	0.471152891	0.274939399	0.41890134	0.382354082	0.418395497	0.375492716	0.748257186	0.918158016	0.783147812	0.953772599
	384	0.285250359	0.222406703	0.199380795	0.251465294	0.406430805	0.318979362	0.295723974	0.330275438	0.243316779	0.178845628	0.202111832	0.270125708	0.249117762	0.285876577	0.286661963	0.256424577	0.287070548	0.389630892	0.233077169	0.206806225	0.21561934	0.287672394	0.466726618	0.193528163	0.154213687	0.23145609	0.51498059	0.434633771	0.835478871	0.820482156	0.572613856	0.863448063	0.212605302	0.318979965	0.219738146	0.225560357	0.216559215	0.196728942	0.430882286	0.24326756	0.345927146	0.377397375	0.389626862	0.404056113	0.91011619	1	0.930954834	1
	388	0.264076944	0.212535375	0.187914011	0.224806423	0.393035626	0.297717693	0.280037518	0.293369503	0.235122329	0.16521071	0.199812596	0.27641495	0.311344273	0.32299538	0.375005143	0.256510635	0.330117657	0.46270637	0.229157943	0.212182402	0.200994495	0.370661251	0.62135058	0.194872162	0.144159007	0.214263382	0.51396852	0.45268372	0.832870427	0.910777982	0.56020987	0.976082889	0.187086202	0.302507349	0.201861152	0.206152271	0.194251022	0.187669742	0.400987045	0.2284047	0.303875405	0.360542539	0.337349278	0.417409996	1	0.986397597	1	0.965326048
	392	0.238537253	0.209515291	0.177623911	0.211002245	0.366791324	0.261046383	0.256098074	0.291975401	0.228424756	0.149429466	0.194755162	0.274609176	0.416439711	0.395520002	0.509111574	0.251744118	0.340202294	0.487240764	0.222480676	0.221850913	0.226503589	0.456120979	0.768088789	0.205094191	0.137693798	0.20242812	0.484455885	0.468928221	0.794681548	0.933495205	0.504252063	1	0.170338681	0.272744455	0.192456809	0.198006633	0.169722916	0.187111817	0.415570547	0.2557361	0.341064588	0.339045385	0.309976361	0.410877268	0.988009806	0.883180547	0.968734729	0.86091028
	396	0.223989966	0.210197234	0.177614125	0.211558227	0.33673485	0.229414724	0.232717337	0.356832875	0.227584368	0.143108672	0.191966043	0.26197094	0.537807571	0.483071684	0.652204049	0.247655948	0.311426366	0.447200162	0.21376347	0.231860773	0.292215486	0.518062582	0.846641463	0.221582951	0.135974932	0.209934206	0.435094618	0.481962926	0.730491984	0.881452879	0.427529417	0.93396736	0.179299792	0.247451494	0.192694599	0.20918289	0.160756574	0.192144397	0.488535344	0.331123597	0.47094731	0.325981598	0.352285246	0.384656469	0.879366349	0.719362056	0.84588119	0.716299673
	400	0.230605356	0.211667902	0.191228796	0.218671531	0.311586381	0.219620955	0.223501687	0.489668842	0.234889596	0.15346157	0.197355619	0.245171778	0.630255593	0.553843398	0.756251595	0.252647894	0.254368677	0.360654137	0.208324262	0.240024201	0.378460781	0.528038776	0.820178576	0.239784009	0.138879591	0.242160245	0.379693542	0.487781862	0.655803731	0.771115956	0.357463526	0.802644358	0.212149053	0.26059695	0.198489679	0.237887866	0.176823603	0.204671437	0.604160971	0.443707152	0.660283433	0.335921154	0.479487326	0.346174567	0.711873903	0.535411323	0.666247664	0.567613955
	404	0.256548541	0.213184989	0.217409289	0.227346207	0.297052119	0.235750076	0.235732271	0.657950733	0.247191625	0.179013777	0.214993806	0.240508145	0.660843827	0.579481835	0.786643381	0.271649584	0.192001573	0.26206853	0.211891151	0.247431227	0.455342639	0.489288109	0.695447961	0.256289661	0.144736034	0.292385544	0.333105049	0.4822022	0.586877261	0.635250525	0.313290619	0.644944283	0.262179142	0.338501716	0.212219322	0.279938239	0.217841593	0.226842993	0.727217144	0.563226517	0.844456921	0.378273182	0.657713677	0.307371356	0.538981594	0.381559049	0.48199639	0.445438791
	408	0.287519026	0.217217418	0.251302413	0.235377987	0.294544894	0.267901566	0.262930833	0.807197018	0.260490005	0.209429027	0.24516468	0.265076395	0.627306664	0.548915738	0.734758698	0.304067045	0.14743361	0.186108094	0.227005829	0.255054081	0.494410264	0.422361849	0.530287433	0.268073613	0.154150156	0.346964599	0.306878871	0.463502487	0.535330455	0.511628446	0.297938368	0.498904102	0.317492435	0.485211651	0.237337801	0.328521695	0.278458577	0.259958562	0.810924922	0.638891569	0.952173511	0.451356994	0.832153766	0.274888586	0.406927953	0.276083446	0.33882879	0.366646998
	412	0.311922499	0.22516206	0.286799644	0.243784388	0.301605245	0.299039171	0.291824794	0.884974043	0.268586245	0.234913672	0.284141	0.324231019	0.559323079	0.473886721	0.620545545	0.342890672	0.134142462	0.163191931	0.253822225	0.267296431	0.483101603	0.353175756	0.383465844	0.276957912	0.167455453	0.3848405	0.305780614	0.433439879	0.504820027	0.426137844	0.298837308	0.389565961	0.367114303	0.681533328	0.2769146	0.370484114	0.347144583	0.300952241	0.827745967	0.637063189	0.945090421	0.540512164	0.932813963	0.257739829	0.337155491	0.221570697	0.253305933	0.326158229
	416	0.319064943	0.235830997	0.318246739	0.255765033	0.313775222	0.315352272	0.31090198	0.864296992	0.266394936	0.248962989	0.323208845	0.416776707	0.50118887	0.383373848	0.482811588	0.375781645	0.149901805	0.198220731	0.288536279	0.286292027	0.428393026	0.300690944	0.302525699	0.287579493	0.183257537	0.392967261	0.32619521	0.396225988	0.491224317	0.38201013	0.296936557	0.324011077	0.394548723	0.872291615	0.329106684	0.397061929	0.405352344	0.342686389	0.777944328	0.557139934	0.832272428	0.621887077	0.920598696	0.26172281	0.321974238	0.209053719	0.226493949	0.310436704
	420	0.308952317	0.246584238	0.344551286	0.273455657	0.32711836	0.313647944	0.31267978	0.754616158	0.255864016	0.252650498	0.354121326	0.5274214	0.485751171	0.309980308	0.36251137	0.392912201	0.179560252	0.2627636	0.323097494	0.310092946	0.352045374	0.270728182	0.300263221	0.302753874	0.199045574	0.373263714	0.357232749	0.357531793	0.486078692	0.369428525	0.278611624	0.294052158	0.401066508	0.991906771	0.386106553	0.405541218	0.440143311	0.375868339	0.686108802	0.433289617	0.662605775	0.670751391	0.803509321	0.284064847	0.334248272	0.223172271	0.240343257	0.309909874
	424	0.291773727	0.255556355	0.367218327	0.295678135	0.340201412	0.301567207	0.300682858	0.595533315	0.241255705	0.252466302	0.372031411	0.629017775	0.515113506	0.275412878	0.287121591	0.391935472	0.203759325	0.32210729	0.350012924	0.333456939	0.279926244	0.258007796	0.350760854	0.321006316	0.21151947	0.341126476	0.384704795	0.325041566	0.481695317	0.372736093	0.247949194	0.283988753	0.395887483	1	0.435472182	0.399305457	0.447786335	0.392614118	0.586849283	0.318316459	0.498503352	0.670816226	0.630990973	0.314516393	0.344716883	0.239432191	0.263957705	0.32068707
	428	0.281409278	0.263712257	0.386971137	0.320055195	0.354462783	0.291209881	0.286549797	0.437667776	0.229137806	0.254827857	0.376553569	0.693534315	0.559889862	0.282289822	0.262813868	0.378689634	0.210646835	0.354550658	0.36599438	0.350716776	0.231251735	0.253465273	0.399655893	0.337173243	0.217803208	0.316087205	0.396946252	0.29958677	0.475208235	0.376228425	0.213425251	0.279959748	0.389785626	0.899181035	0.464199418	0.385449165	0.433091813	0.390649544	0.5083282	0.257546957	0.386302	0.620454826	0.467858539	0.345266442	0.340110733	0.252120323	0.273126598	0.343959494
	432	0.287051828	0.274508197	0.401841231	0.342115889	0.372631649	0.290862597	0.282378327	0.321295152	0.225925382	0.261397231	0.370853993	0.701710429	0.577708409	0.315789555	0.276689417	0.363454764	0.20019723	0.350425948	0.372488965	0.358954247	0.212823334	0.251327678	0.418336262	0.345776125	0.217255037	0.31048238	0.390181385	0.28410349	0.467620463	0.374328497	0.192692141	0.274279939	0.389234824	0.734766487	0.46484591	0.371459654	0.405961848	0.375582378	0.46251996	0.266967939	0.339162906	0.53319754	0.362961354	0.365178712	0.321162813	0.261498318	0.268156688	0.388414468
	436	0.308080233	0.290992805	0.408281592	0.358077665	0.395973733	0.300328931	0.293444761	0.263231232	0.233057631	0.268585357	0.359725211	0.650171631	0.539912859	0.353324486	0.306399474	0.355266384	0.183245865	0.322400236	0.373698457	0.359546989	0.219985799	0.251613409	0.40262575	0.344964647	0.212838951	0.323235794	0.370660575	0.283525937	0.464218227	0.374709447	0.197359715	0.26853423	0.394387279	0.573124352	0.440373157	0.362629453	0.377502306	0.359281079	0.445861771	0.327630947	0.339666371	0.437616752	0.329666145	0.367780373	0.302975938	0.271110425	0.256102915	0.455583976
	440	0.335139829	0.312394784	0.404351705	0.367295529	0.422000821	0.312515754	0.31589918	0.256619456	0.244360522	0.271401001	0.34783195	0.553264213	0.450232838	0.376462121	0.331532782	0.357715862	0.174267594	0.295868199	0.373614475	0.357152702	0.242244236	0.257434005	0.372928463	0.338318069	0.210795216	0.342401872	0.351837664	0.300233892	0.469755249	0.38477368	0.225851271	0.269682494	0.401416752	0.470073032	0.404339787	0.361065029	0.357208945	0.354435623	0.447353059	0.398943529	0.357390888	0.358154398	0.347198249	0.355395749	0.302432759	0.285231877	0.252153889	0.532392997
	444	0.356398501	0.332998155	0.392233892	0.372613852	0.444258749	0.319521706	0.340434198	0.280782328	0.254163623	0.268455165	0.338714981	0.438581829	0.344645698	0.378746898	0.341344239	0.368349329	0.182800722	0.293083641	0.373970753	0.356715043	0.269426547	0.270049506	0.359258073	0.333063839	0.218000868	0.354273654	0.347276895	0.329007335	0.48463008	0.407135488	0.259781164	0.284109987	0.406872432	0.446280094	0.375274478	0.366048687	0.351236612	0.36772972	0.457389781	0.442479932	0.368913404	0.308762035	0.379246032	0.338111808	0.326052875	0.302347132	0.269061866	0.597089241
	448	0.364727106	0.344662791	0.377666144	0.378179465	0.454732802	0.31853967	0.358816381	0.313682159	0.258944113	0.263949919	0.334321851	0.337395504	0.268995948	0.365931829	0.336123641	0.381262895	0.208208346	0.320191435	0.374089391	0.360220928	0.294906349	0.285753459	0.378676128	0.335554336	0.23779652	0.352570278	0.3625952	0.364100346	0.503359843	0.438293833	0.284798443	0.311570772	0.41057675	0.482273029	0.367428114	0.374874353	0.360983088	0.395259521	0.471660974	0.442065666	0.368192665	0.296019005	0.396855971	0.328242532	0.363107889	0.321214381	0.308192001	0.627848835
	452	0.361155825	0.341653366	0.366173799	0.385989709	0.447805365	0.313341	0.368418692	0.340073762	0.258120891	0.264681658	0.334524055	0.273307476	0.253860473	0.349572417	0.323007966	0.390575605	0.240156919	0.364131444	0.372147577	0.365072591	0.31498562	0.296873984	0.423030507	0.346695548	0.266409096	0.341403979	0.390913888	0.392738861	0.518189735	0.469188192	0.28792419	0.344869858	0.414939593	0.534202218	0.382664893	0.383471524	0.381781094	0.423010044	0.488975145	0.408733121	0.363053448	0.313819249	0.391892829	0.332869876	0.398010183	0.335943682	0.357085715	0.612365994
	456	0.352588101	0.324493229	0.358608343	0.393478414	0.423550448	0.31049009	0.371661031	0.352896716	0.254696211	0.273956208	0.336526642	0.253575376	0.295679606	0.338419401	0.309508054	0.392396302	0.263873402	0.400448491	0.366517148	0.365025014	0.326255847	0.295988117	0.464446415	0.360243274	0.292433257	0.330254018	0.414957424	0.400670698	0.520449585	0.489877252	0.268595367	0.370815643	0.42136311	0.559899391	0.40826386	0.38684718	0.402725702	0.432652649	0.50647311	0.368876768	0.362935689	0.341464793	0.374902424	0.348690549	0.414331392	0.339058123	0.395064183	0.554412365
	460	0.345642035	0.299936023	0.349457348	0.394044147	0.388279409	0.31328975	0.37121741	0.350299955	0.251753875	0.287014437	0.334827419	0.266946629	0.358787664	0.332769304	0.298481082	0.384541945	0.266886828	0.406918641	0.356129333	0.353228526	0.323884757	0.286716219	0.474165661	0.365279604	0.300610072	0.324913565	0.415482804	0.381216835	0.510447942	0.494720589	0.238244757	0.377202653	0.426696517	0.539937463	0.422533769	0.379907337	0.409174952	0.410034323	0.517186951	0.344382422	0.368061806	0.360308749	0.361654788	0.36266156	0.404235314	0.326267733	0.404002644	0.472962788
	464	0.341059315	0.276757484	0.329781879	0.38069376	0.351734361	0.318074509	0.365109355	0.332651019	0.250591399	0.291975028	0.322635746	0.289357694	0.395579047	0.326910616	0.291713848	0.365237071	0.24382642	0.375056072	0.339945035	0.325795993	0.302728559	0.272194153	0.441826626	0.351705244	0.278780036	0.321320469	0.393265009	0.346156326	0.491313999	0.484309723	0.213452864	0.359625907	0.422849339	0.482811992	0.405832183	0.359038497	0.388325286	0.355376029	0.512565582	0.338064539	0.367904289	0.36507039	0.359157694	0.358864122	0.373892563	0.300043521	0.3783442	0.394110162
	468	0.332683193	0.260114276	0.293437255	0.35087953	0.32303895	0.315762265	0.346005219	0.307892092	0.25116016	0.276596693	0.294934118	0.302160119	0.385418678	0.319078657	0.286222691	0.336787981	0.210534604	0.314677647	0.316567147	0.290072767	0.273452141	0.258349182	0.385031341	0.315739303	0.238528841	0.307220065	0.352759439	0.305987983	0.468643018	0.464000419	0.206952862	0.325951845	0.400537063	0.413755544	0.355297466	0.324025677	0.33593796	0.290515309	0.488364263	0.333629567	0.36012644	0.354147913	0.360762092	0.338154232	0.339358486	0.269496214	0.329952736	0.339869547
	472	0.313375963	0.248437491	0.251112466	0.309479628	0.306943062	0.29833892	0.318341784	0.280813726	0.249015416	0.240305128	0.260767138	0.29671317	0.335591984	0.304045558	0.277867552	0.306100262	0.17402866	0.25247411	0.287168868	0.25428795	0.238649324	0.250551501	0.332206877	0.272715323	0.188340395	0.284721268	0.306634892	0.279418236	0.453956277	0.440458198	0.221549351	0.290682636	0.355156699	0.35632922	0.290397406	0.282672145	0.272513046	0.229019681	0.454703869	0.323611067	0.339018091	0.329985295	0.360999093	0.302748871	0.312528058	0.246172445	0.280446976	0.319580951
	476	0.286971264	0.240355396	0.20951791	0.26758716	0.30134629	0.272067112	0.2816372	0.257205307	0.241055899	0.194811332	0.224565777	0.272858184	0.269029454	0.282844263	0.265753125	0.27478622	0.141674431	0.204267816	0.257961576	0.224726121	0.205465414	0.250792491	0.310915758	0.231089548	0.141798133	0.250301513	0.278955245	0.280916572	0.458378685	0.41845916	0.249800946	0.268668815	0.298360009	0.319007687	0.227351129	0.244980558	0.210991397	0.185052987	0.420254075	0.296654844	0.309766715	0.302348336	0.350719442	0.263642039	0.300356654	0.238025038	0.248262752	0.328101343
	480	0.255170654	0.230726385	0.179282143	0.237129241	0.300748895	0.241406087	0.240214152	0.244581045	0.228857775	0.152614903	0.194336608	0.24238607	0.22532728	0.262977787	0.253617058	0.247554435	0.118991011	0.178354906	0.231049324	0.206863348	0.18359203	0.250995391	0.32893283	0.200426876	0.113837443	0.211279916	0.290115888	0.311497714	0.481552082	0.401517263	0.278738484	0.267112897	0.243159938	0.301034892	0.185141054	0.217024984	0.167880109	0.168895566	0.399631029	0.257601028	0.287828803	0.287189418	0.330395597	0.244037325	0.30153261	0.245286911	0.242044123	0.351231318
	484	0.226188478	0.217745995	0.17084902	0.224037244	0.299805443	0.215558107	0.207497186	0.247714884	0.217346093	0.130854979	0.180901826	0.224370463	0.233006397	0.254237506	0.246084001	0.232394826	0.112413103	0.172764098	0.210731925	0.203214843	0.182361847	0.248288378	0.371180864	0.18700791	0.116715431	0.185389908	0.333184179	0.351784172	0.517877824	0.389820403	0.296244611	0.280316134	0.200566449	0.28929984	0.178322213	0.20276853	0.157374662	0.180063875	0.401874206	0.227985279	0.290517658	0.293463021	0.310519723	0.260479385	0.307872889	0.261130469	0.254850261	0.374966512
	488	0.213418254	0.205345593	0.183945564	0.226995655	0.295824273	0.20380234	0.205432814	0.257400068	0.213723127	0.137273909	0.189833315	0.229520297	0.280560065	0.259373167	0.250883124	0.235436544	0.118542014	0.178451253	0.202287144	0.20709937	0.191966468	0.242413513	0.4086257	0.191272406	0.135317234	0.191314659	0.395534511	0.38706161	0.557810788	0.381453827	0.295482934	0.293365188	0.18031066	0.274441237	0.200637666	0.202060923	0.178302703	0.199647089	0.424382054	0.232831846	0.310718823	0.319255726	0.307756755	0.303316966	0.308949361	0.277109308	0.268497962	0.393312081
	492	0.223647314	0.20056567	0.199052411	0.237467685	0.289426512	0.209635757	0.235046734	0.266455413	0.223942173	0.161592507	0.207471331	0.254559806	0.333819419	0.27972755	0.271782523	0.252789645	0.147290399	0.182619895	0.206792963	0.212860973	0.207421176	0.23892491	0.423531936	0.19796344	0.158691998	0.218838074	0.460377516	0.400812362	0.585932291	0.375069341	0.276924645	0.295992781	0.185523897	0.257390484	0.226534468	0.207209058	0.202743141	0.220993428	0.449061753	0.264291496	0.337198531	0.356461056	0.320705599	0.35798949	0.305638948	0.290155818	0.26853579	0.41048584
	496	0.245788766	0.203081308	0.207656357	0.244048128	0.28498165	0.220601301	0.293881646	0.269041777	0.24688993	0.183966862	0.223110461	0.290348958	0.365511335	0.309577443	0.305325095	0.280932265	0.206645835	0.190765436	0.216157427	0.218310188	0.220143071	0.244949496	0.413641526	0.203156352	0.176384463	0.25611847	0.506327701	0.385813725	0.588795806	0.371370351	0.252599852	0.28093504	0.202958253	0.251655352	0.242144092	0.210298928	0.215910297	0.238767114	0.465175585	0.307029725	0.354095167	0.390738262	0.342273272	0.405412745	0.305350211	0.306464642	0.255686675	0.436645393
	500	0.270268678	0.210570834	0.206680462	0.239103085	0.286974236	0.230661033	0.371629782	0.262043357	0.275459818	0.193842937	0.230301952	0.324157907	0.356696848	0.339633434	0.342139023	0.312082674	0.298614577	0.213597192	0.22490558	0.222503347	0.223953978	0.26384119	0.393354801	0.204651961	0.183133137	0.285237259	0.520046604	0.352758012	0.564062434	0.371938368	0.227113794	0.259653897	0.222041852	0.262129006	0.241948747	0.209690655	0.215099683	0.249575052	0.464634911	0.337771311	0.352546313	0.406643706	0.359869663	0.423378662	0.319023473	0.339078049	0.246283123	0.479901584
	504	0.286515337	0.217268566	0.195296007	0.223874055	0.296286978	0.236256443	0.45113822	0.250554932	0.300863684	0.186226721	0.224713817	0.345338333	0.317258983	0.360415213	0.369043938	0.337882876	0.412810467	0.260667017	0.22824623	0.226130712	0.218254839	0.292586998	0.381080108	0.20295347	0.178937761	0.29103757	0.502671011	0.315587818	0.525885411	0.379516859	0.204294753	0.259099691	0.238973242	0.288355029	0.226844803	0.206649151	0.197957027	0.252261216	0.449876252	0.338141163	0.333525096	0.396067768	0.364492038	0.404212294	0.354923167	0.399730118	0.266172919	0.539333172
	508	0.286170041	0.217582231	0.181845667	0.205815618	0.310557403	0.237717725	0.510098489	0.24811025	0.313960181	0.168057884	0.207384895	0.349109917	0.269000821	0.365635844	0.375286996	0.351279869	0.524706717	0.332095694	0.225466618	0.230093559	0.205795631	0.322768572	0.384860252	0.20107139	0.172935176	0.270944658	0.466270865	0.287975623	0.485244103	0.396981693	0.187621474	0.304648643	0.25232664	0.319579948	0.205446525	0.205327624	0.174944368	0.249359004	0.432367223	0.31056567	0.309710423	0.366314772	0.353768711	0.357961622	0.41458098	0.489297444	0.335971952	0.603012122
	512	0.270827557	0.210638911	0.178686857	0.200037415	0.32618708	0.23753567	0.534508178	0.262267093	0.311948319	0.152959077	0.18856118	0.341064331	0.244307633	0.357746873	0.360348553	0.352555968	0.604848876	0.413955604	0.218023938	0.234726124	0.197221672	0.341990623	0.39662328	0.201845452	0.175674542	0.238277034	0.426007007	0.280406198	0.455166526	0.424883139	0.18359434	0.403254946	0.262540747	0.34150088	0.193836631	0.208237877	0.165326559	0.244245807	0.424753202	0.270650746	0.300869485	0.335603192	0.336334275	0.308391948	0.488622956	0.592638115	0.456661182	0.652194344
	516	0.250382584	0.203710129	0.188453839	0.215624253	0.339586801	0.237729925	0.52029204	0.289268549	0.298307264	0.15080733	0.184142534	0.330572571	0.260600273	0.3449994	0.333829903	0.346519813	0.628070539	0.481292681	0.212518746	0.238342768	0.201604297	0.34138291	0.398953774	0.205508796	0.190451634	0.212189701	0.392814777	0.293805695	0.447951517	0.45999395	0.192247307	0.545050082	0.270383548	0.340530339	0.201897828	0.214147854	0.179792508	0.238928061	0.432455428	0.246723083	0.3171837	0.321667611	0.325056623	0.273525424	0.559486557	0.681606037	0.605896166	0.669470166
	520	0.234455181	0.206177597	0.201692039	0.249594668	0.347234351	0.240940815	0.47107454	0.315617121	0.278981248	0.160344125	0.197424489	0.322752621	0.310213964	0.335479186	0.30964708	0.337312541	0.583150651	0.507535545	0.213855848	0.240288307	0.21927119	0.320735078	0.38229219	0.210163249	0.209353829	0.20702312	0.370196045	0.316562709	0.463861491	0.494877066	0.218568552	0.694762013	0.273298321	0.322552648	0.224762678	0.221007124	0.207068436	0.233217839	0.450010601	0.255216492	0.349369415	0.330016024	0.326492851	0.263067315	0.608623161	0.725613954	0.743493679	0.646626847
	524	0.229105503	0.220602037	0.213104739	0.287959144	0.346808607	0.24385225	0.398920621	0.323615389	0.262965539	0.170112594	0.21980259	0.314725613	0.360071693	0.331505578	0.29748996	0.324789405	0.478638016	0.476418028	0.221592085	0.23946693	0.239639324	0.292871027	0.350542129	0.214243179	0.216843759	0.221055838	0.355598542	0.339638233	0.488030525	0.52164905	0.261343348	0.805498687	0.265187472	0.296088797	0.247859245	0.223996766	0.231703327	0.226018263	0.464361574	0.288527772	0.375849082	0.349294892	0.335785409	0.272248389	0.624237792	0.704818243	0.82769144	0.588267148
	528	0.233477939	0.23853215	0.213863988	0.312948167	0.340258747	0.240478436	0.326577907	0.31121546	0.250438645	0.173001927	0.237262499	0.302226353	0.384782554	0.327654908	0.296557622	0.307806873	0.345533855	0.397346017	0.2302546	0.233448169	0.250969106	0.267366934	0.317792168	0.214737898	0.208885458	0.23839057	0.344107311	0.356657559	0.512204832	0.535570504	0.312320985	0.840244679	0.250306503	0.272537021	0.257743768	0.219103436	0.239445864	0.219302572	0.463509426	0.31464947	0.380560061	0.362974451	0.344178497	0.286323936	0.606187327	0.619335541	0.831942199	0.509567994
	532	0.240038242	0.25231649	0.200102054	0.309433175	0.330233851	0.228106542	0.262552557	0.28000294	0.239231854	0.162876642	0.242209799	0.283455769	0.368988673	0.322433908	0.298782652	0.28781026	0.224274997	0.302912811	0.232957513	0.22225677	0.250714326	0.251086037	0.304945612	0.21048885	0.184133127	0.246634145	0.334065996	0.361999234	0.529740561	0.537953524	0.355174285	0.787252803	0.227339527	0.260058864	0.252119749	0.207797921	0.227719164	0.211890168	0.449607433	0.321954566	0.362697364	0.359895424	0.342965734	0.293333653	0.565636225	0.491362608	0.754732119	0.429735215
	536	0.240793961	0.250932394	0.178861487	0.283091373	0.315717072	0.211249922	0.216095448	0.247277229	0.228340961	0.143797945	0.229317474	0.258724513	0.327234813	0.309979482	0.295967832	0.26489279	0.141752099	0.21624774	0.224802012	0.209620567	0.23506763	0.245388552	0.320357194	0.203413038	0.149133969	0.237067783	0.325947789	0.354269207	0.536054944	0.536331025	0.373722863	0.664221727	0.20057491	0.26002439	0.231232758	0.197336946	0.199934063	0.203292647	0.426599591	0.299379002	0.328429181	0.334367306	0.330172063	0.28950551	0.519569995	0.367818181	0.618507169	0.369130484
	540	0.234405474	0.228888704	0.167360704	0.243517384	0.297738602	0.197347827	0.201751077	0.237879131	0.219921903	0.131244928	0.203073049	0.238382783	0.276592011	0.28776473	0.279408584	0.244412067	0.116824236	0.159675165	0.208855221	0.199808748	0.208644811	0.246528667	0.349509358	0.196821562	0.119581202	0.212568177	0.319129033	0.336218466	0.534005375	0.540854955	0.360267266	0.510034218	0.17969727	0.26071187	0.203584968	0.196317665	0.171052683	0.194399361	0.404324402	0.255801838	0.296087379	0.296740933	0.315985377	0.276272059	0.482774848	0.272164834	0.467352469	0.332062041
	544	0.225134367	0.195523635	0.174195316	0.210823959	0.281378992	0.199508693	0.222669838	0.263278433	0.216276429	0.138868927	0.182453979	0.237229012	0.240950813	0.26083232	0.253720961	0.237538961	0.146896907	0.150564379	0.197887392	0.200457969	0.182763949	0.246495859	0.367390127	0.192994458	0.116438941	0.191208266	0.312714261	0.315069024	0.530379834	0.558045819	0.318880742	0.376575975	0.178937666	0.260776687	0.185158652	0.20912195	0.161650253	0.187087631	0.394441481	0.216973915	0.287613392	0.27620304	0.315996758	0.261142738	0.461184452	0.218472464	0.341118041	0.315391959
	548	0.22269703	0.181096527	0.200010866	0.20587438	0.274160424	0.223575695	0.261551443	0.303499054	0.223735407	0.16199947	0.187416366	0.257980552	0.237810268	0.249750657	0.243365741	0.247815151	0.206516721	0.1804468	0.204247892	0.216992987	0.176968793	0.248759063	0.362732575	0.195282897	0.139106368	0.194136678	0.305927185	0.295320276	0.530571398	0.585132746	0.26779316	0.286844307	0.194450403	0.264440326	0.190671358	0.231818764	0.178775227	0.183461713	0.401888198	0.21908747	0.307413588	0.29567099	0.333002076	0.254490253	0.449884286	0.209883768	0.256510408	0.3116363
	552	0.233707198	0.202402319	0.233910005	0.233598757	0.282594837	0.264174198	0.306129478	0.335966036	0.242677176	0.189779451	0.2181394	0.289088761	0.266800016	0.266841809	0.273064604	0.266864755	0.261780174	0.220838061	0.231682959	0.247852252	0.195167466	0.262316223	0.333928372	0.204011522	0.178763471	0.223748178	0.297168609	0.284940694	0.534900986	0.608770863	0.221773379	0.251932156	0.221709256	0.276878713	0.215233246	0.254213724	0.207907897	0.189415979	0.416957039	0.26133719	0.337454679	0.35110157	0.35736009	0.25886464	0.436770992	0.233029383	0.221371583	0.314864376
	556	0.257470961	0.258146123	0.260237312	0.276971449	0.309233869	0.307688833	0.340598723	0.339082095	0.267131123	0.208482712	0.260726328	0.314695818	0.307441603	0.320581516	0.35224429	0.284291573	0.293166771	0.257038345	0.270930746	0.284212967	0.240683657	0.297239033	0.308163856	0.216452294	0.220619693	0.271557299	0.287267426	0.289897389	0.538870408	0.610070519	0.194921449	0.262634922	0.249647281	0.298756276	0.250864282	0.26526638	0.234778561	0.207017642	0.434553043	0.321389136	0.363143858	0.42269182	0.372442613	0.275482535	0.409978077	0.254798088	0.231228203	0.31845305
	560	0.285868375	0.328310592	0.265146047	0.321788922	0.346660827	0.337974891	0.348202401	0.309742289	0.28846864	0.207699602	0.295301509	0.318179786	0.351823496	0.407902306	0.474398377	0.290506332	0.28770502	0.277359054	0.30416737	0.312040751	0.309436758	0.358581239	0.323489231	0.227835099	0.248146738	0.319229568	0.2896878	0.310300078	0.537002904	0.574284848	0.194962	0.296929458	0.266199571	0.322912253	0.284555802	0.257843787	0.247246482	0.232151505	0.453036404	0.367440951	0.377081961	0.479953827	0.369076924	0.303630788	0.375443579	0.266515521	0.263215976	0.327482814
	564	0.306613781	0.38269296	0.246435828	0.352914444	0.380265371	0.342094692	0.326499869	0.266684126	0.298312404	0.190194868	0.301201583	0.297627515	0.395688115	0.513207901	0.61057723	0.283362972	0.249121624	0.272863348	0.311656231	0.314937673	0.39252908	0.439345374	0.404577716	0.232568965	0.247071408	0.345837234	0.31138215	0.337478243	0.527515008	0.513267181	0.221132491	0.322040128	0.260900389	0.334801397	0.300465862	0.238727109	0.239052548	0.254960407	0.475159108	0.377055918	0.38429998	0.492121842	0.342477318	0.341757255	0.33622166	0.26563382	0.293578021	0.346929039
	568	0.307047285	0.389478753	0.217019911	0.360584555	0.392145336	0.320759781	0.288358578	0.250354405	0.295356664	0.170219649	0.275975296	0.262755698	0.440266907	0.605010836	0.714555154	0.265604268	0.201622416	0.2484616	0.290937504	0.296699745	0.471685156	0.520029269	0.538957811	0.231572496	0.220239726	0.338084607	0.351892678	0.361894751	0.514433794	0.441937071	0.261622958	0.328678504	0.241029145	0.328616581	0.289497814	0.217284492	0.217543892	0.261389834	0.508390298	0.342376934	0.406384179	0.450229216	0.31519442	0.385690107	0.30136399	0.253156152	0.311253688	0.378562164
	572	0.290692762	0.343540924	0.191518448	0.347317317	0.376519565	0.285996177	0.25353307	0.296854455	0.286724047	0.162233459	0.232623612	0.241421724	0.49126844	0.654515321	0.748807176	0.248054005	0.159841102	0.21837975	0.252400708	0.262838465	0.530528186	0.574834321	0.686503031	0.224024019	0.183356569	0.301356532	0.40211027	0.370496955	0.505401735	0.378779701	0.30791773	0.318537685	0.214148118	0.302489505	0.260526498	0.204298907	0.196304223	0.25095252	0.559697494	0.287369377	0.467544313	0.38105709	0.32239291	0.427670491	0.2854347	0.238230467	0.308392011	0.418142811
	576	0.263772788	0.273043437	0.181825051	0.323510478	0.342399384	0.253009095	0.236365694	0.414618644	0.282851926	0.168943341	0.1909217	0.260185666	0.55071665	0.646871968	0.702016904	0.242234982	0.133172251	0.192156628	0.213936125	0.224163138	0.557072618	0.581751796	0.786158407	0.211907988	0.14974611	0.256809164	0.447710176	0.358427881	0.506319589	0.34644951	0.347544935	0.29293465	0.190699025	0.263349901	0.221781866	0.204834623	0.183960287	0.223079618	0.627856487	0.255963268	0.575981119	0.332154384	0.391968986	0.458069815	0.297629489	0.235734969	0.285335819	0.457830273
	580	0.236001907	0.212774697	0.187300838	0.299553388	0.302951426	0.231621599	0.237430076	0.571710523	0.290366323	0.179417935	0.177431847	0.327825258	0.611170992	0.586028715	0.594151707	0.250792482	0.122757339	0.175172151	0.194072043	0.194814478	0.544791723	0.532319593	0.789944938	0.199445088	0.129534391	0.220384746	0.467330277	0.332724931	0.516303972	0.35751004	0.36750831	0.259878167	0.17828782	0.227922354	0.18630217	0.214331139	0.180646616	0.186031459	0.699538512	0.280527772	0.712337511	0.346241588	0.520164172	0.466877355	0.326213549	0.26014048	0.248721972	0.490289797
	584	0.217499969	0.198220369	0.197185174	0.279798122	0.27489064	0.222943226	0.24551104	0.716020866	0.307633679	0.181995403	0.201169473	0.423715013	0.656342388	0.491753314	0.466233766	0.261473905	0.123344601	0.167367573	0.201422505	0.186216304	0.493589594	0.44426662	0.688096489	0.19160327	0.12541911	0.201707271	0.453612962	0.301518369	0.526601126	0.392191142	0.358672857	0.244991753	0.178355569	0.226221532	0.166601995	0.219042942	0.178952192	0.154935913	0.752419682	0.361080003	0.833544328	0.436422534	0.680677851	0.447496103	0.364355178	0.31946905	0.228456171	0.513075228
	588	0.214243368	0.230886573	0.19807805	0.262746103	0.269358301	0.221089083	0.249004998	0.791852418	0.325892602	0.162940568	0.244370532	0.516640193	0.667984759	0.395212512	0.36032636	0.262439718	0.119858155	0.16873542	0.220331708	0.190698602	0.411087434	0.349000595	0.537669426	0.186216201	0.130150144	0.200316074	0.413284305	0.279513921	0.525647713	0.430564839	0.3202489	0.272196094	0.180405455	0.275782123	0.170070339	0.212029854	0.17022346	0.144915827	0.764544051	0.463649774	0.891528248	0.576263427	0.820023438	0.401116086	0.405346452	0.412446821	0.256042288	0.530401218
	592	0.218519836	0.281300591	0.18554074	0.246751787	0.281562952	0.219083477	0.239589982	0.770086737	0.335116672	0.123221888	0.284356908	0.570468228	0.635176657	0.319734482	0.300590595	0.246036515	0.113019208	0.187146189	0.23041422	0.20235519	0.321592516	0.268237365	0.387860727	0.184428167	0.133026034	0.207127417	0.363875367	0.279993116	0.51317963	0.460049786	0.264937995	0.348658748	0.188172155	0.366852696	0.202445309	0.193559026	0.153080491	0.178588338	0.72536142	0.538952034	0.857257268	0.710864517	0.88670564	0.34476922	0.443484208	0.527249686	0.348551279	0.550747239
	596	0.22526132	0.306313192	0.171362495	0.228373146	0.296870115	0.214011391	0.220746956	0.661504978	0.330587492	0.108178602	0.311506692	0.567437068	0.560843892	0.273520921	0.285357639	0.217371819	0.113065027	0.231362938	0.221988657	0.214710721	0.2420592	0.219431759	0.284004712	0.186087469	0.132230417	0.209432066	0.325223039	0.304321229	0.488123121	0.476388657	0.211447104	0.477618261	0.212558662	0.478097125	0.255660927	0.172261796	0.161996237	0.25236169	0.642488981	0.550189494	0.736886303	0.783435058	0.855587698	0.29221188	0.480895694	0.641924197	0.500649002	0.581172549
	600	0.230990053	0.289648969	0.183334314	0.209491004	0.305786005	0.208472284	0.209348857	0.509615663	0.3157258	0.159657696	0.326560841	0.517775723	0.462046414	0.255220559	0.293533169	0.222134236	0.140153555	0.309940366	0.206094778	0.22183468	0.185913998	0.209535387	0.24998221	0.19000807	0.129503315	0.206647174	0.310441527	0.341999643	0.45782894	0.490848831	0.1919886	0.645584226	0.257426702	0.583859465	0.316717605	0.178427205	0.21603895	0.347788122	0.542672676	0.493445098	0.5706783	0.763235367	0.739757769	0.255811024	0.526153938	0.731018971	0.687942501	0.621389455
	604	0.235300686	0.235296542	0.239824357	0.200066078	0.303570989	0.212320652	0.226754891	0.371503327	0.299328011	0.292597525	0.350944349	0.4540637	0.364109712	0.257138309	0.300307368	0.290782162	0.195101102	0.425706322	0.213668814	0.221427424	0.162281214	0.235605225	0.291358879	0.196218522	0.130226459	0.202477854	0.321115073	0.385495406	0.443926787	0.526910171	0.22894396	0.811185823	0.323747369	0.653353787	0.372834175	0.232696317	0.320479866	0.441015619	0.456248506	0.398886839	0.418847944	0.660023229	0.583759861	0.242910741	0.586674889	0.773491572	0.856452817	0.661216479
	608	0.241276199	0.198231409	0.343618998	0.219163827	0.293064045	0.229751084	0.269331003	0.281032947	0.289197419	0.496044145	0.414413081	0.413412077	0.290527156	0.267258074	0.293822764	0.434700609	0.268247068	0.566337096	0.275695469	0.220923464	0.173869939	0.274558675	0.348518907	0.213672403	0.146787483	0.201717307	0.348705136	0.425771667	0.462855876	0.60418533	0.325612772	0.929939162	0.405749791	0.664941229	0.41359275	0.329879798	0.459872112	0.512472398	0.404987235	0.312732792	0.323350877	0.517690536	0.442164352	0.256845593	0.660640745	0.759689481	0.954110074	0.683507046
	612	0.250704897	0.234076157	0.480901576	0.265810063	0.289741012	0.255914628	0.321381421	0.247152919	0.286602341	0.729231344	0.531660927	0.417491863	0.254943666	0.282947776	0.276375976	0.635229728	0.342579006	0.699588733	0.406414773	0.228359375	0.210407574	0.314102484	0.391025715	0.241277377	0.176741383	0.209367269	0.380446154	0.456976711	0.511432104	0.722453995	0.458727546	0.968132141	0.483797907	0.628948433	0.422723706	0.447334347	0.601855884	0.529098818	0.399485617	0.271262061	0.300188088	0.391197059	0.355030955	0.281891291	0.73364201	0.694383955	0.950215568	0.671708633
	616	0.265395904	0.370624057	0.617255982	0.332853412	0.303188311	0.281815031	0.362568641	0.253075737	0.285366295	0.911410111	0.687407912	0.461498584	0.256695935	0.302529096	0.260986382	0.845940285	0.396171218	0.794576113	0.588305515	0.2488329	0.252105414	0.345008264	0.405877197	0.277334907	0.212642907	0.226268531	0.405714815	0.478648489	0.582061034	0.855821427	0.591136347	0.916480096	0.530258456	0.567095633	0.407662063	0.554260556	0.68602969	0.495688732	0.429557123	0.282258502	0.331369965	0.319686125	0.33271257	0.305061449	0.782809292	0.594464111	0.848688675	0.618436604
	620	0.285830603	0.58536176	0.709414025	0.40598753	0.333943764	0.299857913	0.378195824	0.270677867	0.278930355	0.982408649	0.83759127	0.517805978	0.282335291	0.323454991	0.25957534	0.983545225	0.406539694	0.825071489	0.769963261	0.281662622	0.282501549	0.364216775	0.398048837	0.318670117	0.244991378	0.244626847	0.419320357	0.492026792	0.658841649	0.961603157	0.674022656	0.794196834	0.530516695	0.501179611	0.380090282	0.607907198	0.683942204	0.432790751	0.469926301	0.324001482	0.378136802	0.309994666	0.356556806	0.318221675	0.786933039	0.482419817	0.686049782	0.530481324
	624	0.309068087	0.816570394	0.731959642	0.466221228	0.372317974	0.303386714	0.366928143	0.275419179	0.266641526	0.923088868	0.927564853	0.55162323	0.311755389	0.342261953	0.272513495	1	0.379349252	0.780383821	0.884625712	0.319675467	0.292159707	0.36434417	0.371651892	0.358809945	0.264541017	0.257597326	0.420794733	0.49595677	0.715800017	1	0.678413124	0.640942924	0.482726933	0.444860505	0.349943662	0.588325747	0.598800277	0.363755694	0.49776093	0.360958335	0.399109536	0.338257886	0.39315254	0.319445248	0.737376307	0.378717399	0.515022088	0.437882369
	628	0.329050845	0.974241358	0.681999892	0.489705491	0.403848928	0.296261163	0.355845964	0.267518656	0.249052977	0.760807158	0.918214384	0.539453751	0.327238251	0.354319974	0.286630864	0.891280014	0.334213348	0.671028185	0.888886523	0.347253337	0.280091981	0.35391891	0.349406521	0.381942427	0.259065714	0.262571304	0.41156938	0.485839951	0.735995319	0.954006756	0.605817667	0.500215262	0.400735483	0.401774217	0.32177516	0.510637038	0.463921019	0.305252376	0.502489917	0.365636645	0.386507528	0.36701981	0.413035537	0.307913661	0.643695356	0.302708198	0.382038358	0.36072804
	632	0.341515242	1	0.57850079	0.473819271	0.41079486	0.28978996	0.378115846	0.253708051	0.232239344	0.554689861	0.805925052	0.480233417	0.320014785	0.354653287	0.29176988	0.699805032	0.294779131	0.525926597	0.780724578	0.353109014	0.24835825	0.343043892	0.344985186	0.384159801	0.23362555	0.258707156	0.392957217	0.456714243	0.716436128	0.838385544	0.488120155	0.402188352	0.309798582	0.368990244	0.295090228	0.408440317	0.326735106	0.263248443	0.482899531	0.336560073	0.350109753	0.373279214	0.403711412	0.290074542	0.530479788	0.255503496	0.309788657	0.312520673
	636	0.342613633	0.888451342	0.452919042	0.427853017	0.391280859	0.293232299	0.451406423	0.248578576	0.223829904	0.367762373	0.625436554	0.393886764	0.296736082	0.348298407	0.283291535	0.494419144	0.276960415	0.381918898	0.601098177	0.334870787	0.215856614	0.337675177	0.357019289	0.365692017	0.198785017	0.247359537	0.36656571	0.408367339	0.667605025	0.692504552	0.372632662	0.354175691	0.236665075	0.342156962	0.267826048	0.317358978	0.227043159	0.235254765	0.451267988	0.291233437	0.309414022	0.353443787	0.375742058	0.275125179	0.42667463	0.232413092	0.292683749	0.296944391
	640	0.330552739	0.687751412	0.336549955	0.368234865	0.356795949	0.307922247	0.563425996	0.26012078	0.225237455	0.240939146	0.434023138	0.314301513	0.267566108	0.342352056	0.264890897	0.338479098	0.281735639	0.270213715	0.414166814	0.299745327	0.195563566	0.337137042	0.373055927	0.331836905	0.166439174	0.23494053	0.338278672	0.356589087	0.607638236	0.560985153	0.29963228	0.342609276	0.194102663	0.318861313	0.240284797	0.259514954	0.18132301	0.216062714	0.423125416	0.250925006	0.285353062	0.318210467	0.344127055	0.268401685	0.354741494	0.226575053	0.305796757	0.306765866
	644	0.306925126	0.473600196	0.250606168	0.31197625	0.325198587	0.326543323	0.674300691	0.283882323	0.229358708	0.181466218	0.285634046	0.259587939	0.244541997	0.341473267	0.252062992	0.262968332	0.296293502	0.204603704	0.276444436	0.261120487	0.191651335	0.33534612	0.379151633	0.291638891	0.145637979	0.224955121	0.312301766	0.310523904	0.554692476	0.473007636	0.284054215	0.344227758	0.183732991	0.29902348	0.216514901	0.23677346	0.180692584	0.202326738	0.407143658	0.232210635	0.290499429	0.287954222	0.321969911	0.270818427	0.318980497	0.231361825	0.320849904	0.317499112
	648	0.277166444	0.312112509	0.200751971	0.271316164	0.310007695	0.337918808	0.735632196	0.308539925	0.231225646	0.169269349	0.203056733	0.235521139	0.236639666	0.344139987	0.257589464	0.258240246	0.302509066	0.181808575	0.207892994	0.231850165	0.198901782	0.325048718	0.368620568	0.254651901	0.140009307	0.217971384	0.29438297	0.28019806	0.521152504	0.431661809	0.310900914	0.339618903	0.197579481	0.283529578	0.20016575	0.235185317	0.201753686	0.192997366	0.404136949	0.23783532	0.313459882	0.279471502	0.314850537	0.280805593	0.309343493	0.234894923	0.320080974	0.320166899
	652	0.249594174	0.23211586	0.180501297	0.251252768	0.312945162	0.334110428	0.715870416	0.326989354	0.227476026	0.174650797	0.181531103	0.235383214	0.24497941	0.342924899	0.277366821	0.287061118	0.28764156	0.186221772	0.20281576	0.218122466	0.20718558	0.303090926	0.345532926	0.227399722	0.147451995	0.213104792	0.29658033	0.272144667	0.511491541	0.418573416	0.346361445	0.321872573	0.216236743	0.273085323	0.194943927	0.236693206	0.222325111	0.191553484	0.408172546	0.253837165	0.332881478	0.29035696	0.319694706	0.296620762	0.309295579	0.23570409	0.301502001	0.314505432
	656	0.232901518	0.220389229	0.179013488	0.249947236	0.324474833	0.31522478	0.617504942	0.333802555	0.219264443	0.175766718	0.198375751	0.247282174	0.258876353	0.329878616	0.295878071	0.309665507	0.251166205	0.198436695	0.227454863	0.217433089	0.209283077	0.274181791	0.317767494	0.211509096	0.16184331	0.209777177	0.319619668	0.285576955	0.523244995	0.410192509	0.35793051	0.296769765	0.223912104	0.268249797	0.202647597	0.230588568	0.232354234	0.199133002	0.411401883	0.264780765	0.337231938	0.308058499	0.324574042	0.317233754	0.305366899	0.232617954	0.27496732	0.31483731
	660	0.232776674	0.2391208	0.188907311	0.260900849	0.331721367	0.288974957	0.476190474	0.330747189	0.211993095	0.166619951	0.22029351	0.256412558	0.268534797	0.304465001	0.300103466	0.30561862	0.204251178	0.205810149	0.246820246	0.221666208	0.205680859	0.243793512	0.305567079	0.204052825	0.175916111	0.208513635	0.354588561	0.301203889	0.549246069	0.393958169	0.33204305	0.274060782	0.220435783	0.270003631	0.216179786	0.218265188	0.234669374	0.212393713	0.409289008	0.265849005	0.327119319	0.324134851	0.324928752	0.34153078	0.292426928	0.226199414	0.251182691	0.332894612
	664	0.249082535	0.252415869	0.200615139	0.275692601	0.328209301	0.265562183	0.342480552	0.323835711	0.214350216	0.15357947	0.226377787	0.263216771	0.267368691	0.278801169	0.283118575	0.280610991	0.16285281	0.207754811	0.244956789	0.223157384	0.200615349	0.230320705	0.324100979	0.200461394	0.18423112	0.210029188	0.392992406	0.310976205	0.579616294	0.369662478	0.279652616	0.260680503	0.2129699	0.279537965	0.226363596	0.209504	0.237375659	0.226348078	0.404398592	0.259702204	0.307684406	0.330992963	0.321779239	0.367054605	0.278031502	0.232800789	0.235800331	0.375492806
	668	0.275178724	0.245319567	0.209266885	0.286535863	0.318643494	0.251452698	0.252858279	0.316995485	0.233721909	0.145596929	0.220258281	0.271648943	0.257901526	0.275412878	0.260037097	0.256380808	0.137027417	0.209854862	0.233597518	0.219235984	0.201740474	0.254006726	0.381712491	0.197636258	0.185196026	0.213872424	0.427432891	0.311516792	0.603360787	0.349806447	0.225622068	0.258537013	0.210079957	0.296776845	0.229186913	0.213756626	0.244753603	0.2386075	0.401400619	0.25545502	0.29038962	0.331306507	0.318852072	0.389788856	0.282160099	0.262199854	0.238757733	0.440311194
	672	0.300171118	0.225712303	0.213753149	0.288328879	0.315309536	0.246159208	0.220820558	0.310224104	0.262260077	0.145963621	0.213159919	0.284530385	0.253816907	0.31668367	0.262141793	0.252267111	0.129527839	0.2177892	0.22472618	0.214881482	0.209980856	0.31844605	0.477355801	0.199509225	0.181344846	0.21709137	0.447408282	0.304620943	0.610454394	0.361359859	0.190544837	0.270055529	0.222764127	0.318657952	0.224655865	0.232514397	0.25339717	0.247367062	0.403987272	0.260797313	0.293599781	0.335032659	0.320627643	0.405493072	0.320879036	0.321310219	0.261466239	0.516381031
	676	0.313401015	0.211329293	0.21404944	0.279913211	0.328414043	0.243928962	0.233511462	0.301397568	0.286787246	0.150677371	0.211437175	0.299290719	0.271036072	0.410616863	0.31868344	0.271124748	0.135545189	0.232837423	0.230471035	0.217202129	0.221337572	0.412289951	0.602934328	0.209607043	0.17765772	0.217652168	0.453863954	0.294234827	0.595040042	0.405374341	0.191190392	0.290416246	0.252731826	0.338945862	0.214957826	0.257533727	0.255630907	0.254489824	0.413383074	0.274185521	0.321587443	0.35147301	0.330744486	0.411691733	0.384782146	0.408951911	0.304262133	0.581389583
	680	0.309140896	0.213118205	0.208096662	0.26412286	0.356993745	0.23885855	0.259858625	0.28948996	0.296287786	0.153816102	0.218648659	0.309294961	0.319577146	0.541041107	0.434276078	0.298275793	0.144648503	0.248954741	0.24942698	0.230103216	0.230420927	0.517881599	0.729427993	0.228709352	0.178541366	0.216019383	0.45151025	0.286510267	0.558931284	0.460631611	0.217225647	0.319590467	0.29084022	0.350496696	0.207345772	0.275606732	0.246632723	0.262969047	0.42289827	0.288229501	0.359040608	0.380351883	0.344439675	0.40877608	0.451968105	0.51282867	0.369529393	0.622370885
	684	0.289119918	0.226813875	0.199560607	0.246356164	0.386969815	0.229699535	0.27336161	0.276233261	0.286085057	0.152175188	0.228479316	0.309103971	0.395598658	0.669309146	0.582469147	0.312946919	0.148633634	0.256354488	0.267698416	0.250313765	0.235175473	0.60261108	0.823502433	0.253235436	0.184893961	0.215034277	0.44460273	0.284211085	0.51365486	0.502318453	0.245937967	0.361753752	0.321581816	0.348960999	0.2061526	0.276457656	0.229186162	0.272524237	0.42616399	0.29514515	0.388932657	0.415094148	0.355569244	0.399313544	0.498321429	0.599594852	0.457731905	0.637019629
	688	0.263406745	0.237834498	0.192227671	0.232509046	0.398419698	0.218961984	0.26918245	0.265014359	0.259633304	0.146752196	0.231301846	0.296969846	0.478090128	0.748818642	0.710086848	0.304223327	0.146910596	0.248096467	0.270504219	0.268835361	0.23649225	0.634243879	0.855035659	0.275779843	0.192928014	0.217690088	0.434532405	0.285456095	0.472014114	0.513194926	0.258253958	0.419992802	0.331085659	0.335447527	0.210316097	0.259675961	0.212176792	0.278564013	0.421702829	0.290243745	0.400767386	0.440809966	0.360145528	0.386065944	0.501111904	0.644752071	0.553103281	0.633039216
	692	0.240699783	0.237991984	0.187932294	0.225027602	0.382623615	0.215287223	0.255537025	0.258374762	0.231320537	0.141959712	0.222827831	0.277139615	0.53547214	0.746263404	0.763541759	0.278454178	0.14188285	0.22555324	0.254203194	0.27472437	0.243427357	0.602612619	0.809119979	0.28457256	0.19574373	0.225714372	0.420814957	0.290267433	0.452369751	0.480878168	0.251655507	0.487479682	0.31433658	0.316014581	0.214811292	0.234923441	0.203980091	0.274793686	0.412748275	0.275834065	0.388625536	0.443384701	0.35729495	0.37026337	0.454952924	0.635515964	0.639010106	0.621630966
	696	0.227000352	0.224124984	0.186553804	0.223371178	0.345772768	0.222992051	0.245046103	0.256619456	0.222070276	0.14153141	0.207271153	0.257160983	0.543164594	0.658786672	0.71706024	0.249407542	0.136578989	0.196902934	0.228094328	0.263673646	0.265198545	0.518623447	0.695521805	0.274418519	0.187635642	0.236175347	0.404168466	0.300313244	0.467273136	0.425699758	0.227789383	0.557382005	0.277856542	0.297998251	0.214854219	0.211654461	0.205930359	0.258035528	0.405293608	0.260867149	0.359686991	0.418615474	0.347834659	0.351505648	0.387303459	0.577626214	0.698071724	0.6094957
	700	0.223811186	0.204622731	0.187348118	0.224534356	0.300282898	0.239453061	0.247603405	0.258825956	0.238382521	0.144504812	0.192967593	0.243243314	0.496235746	0.517347105	0.588010653	0.233193375	0.135104576	0.177730628	0.20636287	0.241199613	0.304016385	0.41092241	0.548432545	0.24945642	0.171813078	0.242784072	0.388517242	0.319354351	0.510430628	0.381157364	0.200206926	0.61821645	0.236563448	0.285630273	0.209802765	0.197979287	0.211107768	0.232006826	0.408524469	0.254214533	0.331441298	0.375796524	0.338890686	0.32936371	0.335567799	0.493400333	0.718605406	0.594652867
	704	0.228580598	0.193058435	0.189395094	0.225041838	0.272021499	0.256163789	0.260672077	0.265084119	0.2720584	0.146838576	0.188044669	0.238621203	0.413159488	0.378971294	0.431071093	0.238321614	0.140254271	0.184963795	0.20349326	0.216942845	0.351564195	0.314881786	0.414270313	0.221073019	0.151009178	0.240243515	0.379518895	0.350515286	0.560938799	0.374855047	0.181249551	0.657630874	0.204119845	0.278454501	0.202267157	0.196603536	0.209991514	0.204962206	0.422462105	0.257248646	0.31644397	0.333511126	0.33572477	0.305351615	0.328316895	0.411459789	0.699609245	0.568863106
	708	0.235985981	0.198765169	0.192736338	0.222731309	0.283261675	0.265569228	0.272801819	0.277322879	0.305558831	0.145764637	0.197280981	0.242021585	0.327215636	0.280240235	0.302472514	0.259741501	0.154474162	0.224353637	0.221223896	0.20842953	0.391628044	0.252235171	0.325140713	0.199192352	0.133823256	0.22882863	0.380159148	0.391740586	0.597748539	0.41010761	0.190460809	0.666687553	0.187971673	0.272973996	0.197020513	0.203222464	0.199829319	0.185226872	0.438415934	0.263948403	0.31611781	0.309994666	0.339199113	0.284464335	0.370433581	0.353504499	0.65045232	0.525037643
	712	0.243106951	0.214777141	0.198643571	0.219176668	0.330404738	0.261216609	0.273304854	0.297082065	0.326145401	0.141616156	0.21160375	0.248716129	0.267435732	0.239704131	0.235377211	0.277164948	0.180409387	0.290412999	0.243689538	0.222860129	0.407815955	0.229920748	0.295704852	0.190701338	0.130964007	0.213156505	0.386860322	0.429790464	0.601247281	0.465123821	0.226952647	0.642562678	0.187826145	0.265311972	0.197378336	0.209542205	0.182245834	0.178603512	0.445706547	0.266301507	0.322207629	0.313606736	0.345936096	0.269762694	0.440314554	0.325438369	0.585466869	0.464575515
	716	0.250263083	0.228333394	0.207650225	0.217081029	0.390889156	0.245877316	0.260508718	0.321485367	0.322695013	0.137767487	0.219380877	0.256294519	0.250465586	0.257696664	0.239225908	0.280052337	0.219347259	0.370495959	0.253992711	0.255805663	0.392056334	0.242911163	0.316783717	0.19893998	0.147100835	0.200724764	0.389962203	0.448500282	0.566442209	0.506026386	0.283308952	0.588967419	0.196411895	0.255891521	0.202373413	0.212742031	0.166024827	0.184553304	0.438335058	0.261439339	0.324344284	0.338891784	0.350781887	0.263240765	0.501021663	0.317628996	0.517013654	0.399394002
	720	0.259086675	0.229981504	0.217733901	0.218354732	0.442329864	0.228062331	0.242073521	0.341112602	0.299858795	0.141203556	0.216400492	0.262457493	0.267612911	0.301812417	0.284662439	0.269780453	0.267986202	0.44499042	0.247688436	0.29365728	0.348959417	0.269580536	0.353169905	0.215351693	0.174303419	0.200693653	0.379618146	0.437158061	0.512277005	0.508205939	0.354876687	0.514961017	0.203693336	0.249914841	0.207031946	0.212528219	0.161031477	0.195904731	0.418446742	0.250476481	0.31831935	0.370479073	0.349963204	0.265540728	0.519761494	0.313550002	0.45145735	0.346752661
	724	0.269800486	0.220319789	0.225567446	0.222603432	0.461120098	0.217874581	0.227628341	0.343121793	0.270739791	0.153712371	0.206270063	0.265579792	0.294563547	0.328461344	0.322348088	0.254144332	0.316153321	0.492397512	0.229397594	0.324635144	0.293559352	0.284981452	0.37088582	0.227235283	0.204966696	0.217052946	0.35385388	0.397146805	0.460476048	0.469071893	0.436964284	0.433155112	0.204588585	0.2608213	0.207378295	0.211378269	0.1722431	0.204644875	0.396039152	0.240762792	0.309393401	0.392522617	0.343171345	0.272330928	0.48540289	0.300997154	0.390196266	0.319759219
	728	0.278814462	0.205207314	0.228282767	0.227185808	0.437323813	0.220248627	0.223627262	0.32408249	0.248196919	0.170215684	0.192794914	0.265141636	0.307017011	0.328168923	0.326277183	0.241611174	0.34843432	0.50069286	0.208822871	0.33617453	0.243869803	0.282328497	0.363243605	0.229271087	0.229129807	0.24011841	0.320329939	0.344291021	0.443705205	0.410395732	0.507110521	0.357637915	0.199908657	0.289083457	0.202670442	0.214006439	0.193109166	0.207148159	0.396736769	0.243912187	0.308379828	0.398109341	0.333626696	0.277749415	0.414593917	0.27878862	0.334105701	0.319580951
	732	0.28279219	0.194181076	0.225607037	0.228959921	0.384044005	0.232014261	0.228799356	0.286858534	0.237983407	0.184069005	0.185787111	0.261563625	0.29764789	0.310365198	0.303774352	0.243374598	0.350490144	0.467860418	0.200711525	0.329329534	0.212602801	0.268344433	0.34280658	0.222731834	0.239485214	0.258730211	0.291407056	0.297948136	0.476163202	0.358592205	0.550163808	0.301237511	0.19380147	0.322768756	0.196273119	0.221321443	0.21000821	0.204019888	0.42753626	0.265102733	0.323144943	0.392978807	0.326347984	0.281382547	0.343093821	0.255220134	0.287271413	0.334704204
	736	0.278537396	0.200955788	0.220678984	0.226786485	0.327751919	0.244564323	0.236231106	0.251299339	0.237251736	0.191800977	0.195478582	0.254756383	0.273460113	0.288100662	0.273362159	0.258503197	0.317346781	0.402870762	0.214177005	0.31380416	0.202546443	0.253299472	0.331818917	0.210324017	0.236827538	0.266165486	0.292752392	0.281996737	0.543757863	0.355671264	0.551184141	0.27196768	0.190984791	0.345035252	0.197674425	0.232467989	0.213393047	0.199283555	0.478154189	0.293112046	0.351392577	0.391145266	0.325683057	0.285723779	0.306954078	0.240301284	0.256590672	0.348322217
	740	0.26596376	0.224860298	0.218269761	0.225261286	0.294544894	0.250093279	0.239550411	0.248123095	0.238640131	0.192236615	0.215122826	0.249538658	0.255352208	0.28381893	0.262813868	0.272482008	0.258601934	0.323921004	0.237041234	0.30095098	0.207539632	0.251327678	0.353809993	0.199217824	0.228563523	0.260607814	0.326668284	0.299973817	0.614125666	0.405736524	0.503200924	0.269701089	0.193703697	0.344272226	0.211628083	0.245606981	0.203846234	0.198879418	0.526445603	0.313577271	0.380050106	0.404837667	0.333304972	0.292612945	0.323743596	0.238025038	0.247247854	0.349676317
	744	0.249473795	0.250182855	0.221221301	0.22930211	0.297704808	0.245189097	0.24014446	0.301650776	0.236646621	0.189989703	0.232575227	0.252523586	0.260604107	0.306182693	0.288603614	0.274538834	0.19628712	0.253722437	0.252066378	0.296750305	0.217521137	0.268886369	0.409058547	0.198950856	0.223325402	0.246354026	0.376638726	0.336698251	0.661188641	0.485127071	0.415146597	0.285241001	0.200277814	0.315635654	0.233198704	0.258216861	0.188031325	0.202703402	0.552628067	0.316179953	0.392504766	0.434828844	0.347453452	0.303761027	0.383977933	0.244666112	0.257692129	0.342292894
	748	0.236346789	0.264207938	0.22757906	0.241899429	0.33267716	0.23352243	0.244638	0.40987248	0.231911008	0.190785214	0.240848765	0.268338632	0.290285008	0.342679521	0.338961706	0.265228093	0.15508547	0.212313916	0.252789507	0.29884872	0.224040911	0.297440928	0.471569257	0.209203094	0.22510756	0.235636462	0.417233179	0.366587657	0.659231048	0.557070395	0.313396675	0.303671204	0.20637442	0.270010781	0.251819256	0.266467811	0.17352144	0.206528515	0.536718551	0.298010494	0.379839367	0.467479494	0.363592168	0.316710514	0.457241164	0.254467166	0.278739177	0.343542398
	752	0.232776674	0.263586099	0.230955456	0.261122482	0.381126745	0.22352462	0.258988901	0.550442107	0.230838954	0.19399681	0.241312197	0.295935111	0.327510292	0.368513817	0.382013358	0.253724536	0.149525455	0.209294169	0.244777061	0.299222632	0.22340807	0.319037451	0.504004802	0.223600113	0.23065569	0.236059472	0.431584924	0.373386481	0.608205685	0.597420113	0.232566819	0.311715185	0.207066005	0.246855577	0.257549251	0.269479133	0.170002203	0.205647891	0.490252266	0.269329904	0.349266707	0.481270247	0.376196153	0.325868535	0.509333597	0.268257138	0.298778274	0.37507377
	756	0.239997084	0.251234641	0.22477244	0.280080692	0.420970261	0.222605313	0.281741686	0.681209341	0.241279775	0.192504546	0.237273851	0.326694703	0.348218318	0.364112359	0.387939575	0.252267111	0.175467292	0.238754531	0.237569021	0.290367259	0.218521202	0.318716078	0.482165364	0.234957316	0.231768323	0.245878836	0.407425714	0.349790357	0.535473986	0.580055368	0.200422448	0.305915727	0.201147704	0.278362034	0.244149217	0.266410296	0.177128052	0.200104706	0.444766212	0.255963268	0.32407806	0.460026566	0.381169263	0.326831288	0.520739183	0.297736919	0.312453264	0.449362106
	760	0.253186911	0.237938471	0.208262951	0.288054119	0.436802275	0.232517711	0.303229064	0.758592284	0.267444084	0.179402078	0.241824211	0.346839564	0.338190712	0.329966751	0.350967953	0.268948325	0.2115778	0.280275703	0.245846831	0.270753219	0.210826322	0.296217961	0.413971136	0.240982875	0.221012433	0.255711671	0.366330068	0.313572718	0.478368501	0.518878446	0.221158277	0.296821866	0.191402678	0.370103392	0.216755709	0.256594661	0.185214022	0.196093788	0.436944947	0.281701152	0.334062298	0.4060679	0.378284581	0.321124759	0.496205678	0.360625194	0.326889022	0.560286739
	764	0.264240235	0.234768768	0.190333666	0.280006544	0.425835375	0.248352989	0.310323965	0.759990304	0.307374316	0.1576666	0.262989916	0.344498749	0.305724304	0.289148466	0.297115582	0.29664082	0.231063612	0.307283772	0.270321909	0.246013095	0.201092087	0.269337968	0.340371906	0.239785816	0.197137866	0.255562105	0.343526728	0.293044449	0.466287554	0.445761786	0.271644421	0.305643675	0.189747819	0.49863535	0.193224239	0.240723334	0.184085761	0.208699068	0.489832408	0.356130011	0.400833891	0.342982381	0.372891589	0.317578101	0.460514528	0.468218089	0.360177932	0.683547625
	768	0.266946598	0.240909042	0.188026381	0.259239743	0.397403962	0.26171601	0.295289142	0.693799121	0.354201947	0.145596929	0.299091024	0.31854581	0.28141459	0.275412878	0.27235692	0.316728301	0.217733606	0.300324084	0.29507588	0.225364135	0.194082341	0.265863043	0.31601442	0.235384232	0.169021925	0.242449253	0.366723731	0.309989156	0.507088244	0.393578115	0.313078052	0.353807229	0.204657893	0.629400106	0.198581419	0.222513034	0.179618397	0.252227578	0.600319	0.46863961	0.525617498	0.309019635	0.375983438	0.3283691	0.443480299	0.612936669	0.431432227	0.787009818
	772	0.261312955	0.245339426	0.219274062	0.236500599	0.367301087	0.266067381	0.263727044	0.593406745	0.399742561	0.172314204	0.341557979	0.284076635	0.303839363	0.313674226	0.317734493	0.312701768	0.177953442	0.259304339	0.298476418	0.21603738	0.198899583	0.307831969	0.37969617	0.231132866	0.144382523	0.223431841	0.437509035	0.365952791	0.584393856	0.381013936	0.314199565	0.450324142	0.237605959	0.714244263	0.240925879	0.209504	0.187812231	0.330661637	0.739740822	0.591668964	0.685957233	0.339007464	0.40182579	0.361365007	0.463202754	0.764788256	0.547438609	0.845208591
	776	0.253970335	0.237571945	0.293237651	0.224036073	0.350126581	0.26093694	0.234731322	0.498819466	0.437574268	0.263519373	0.383203834	0.269964363	0.398261769	0.404369763	0.445632404	0.284962919	0.132308456	0.198744704	0.271462708	0.219732652	0.224446797	0.396869938	0.531206373	0.227374234	0.130008189	0.211818816	0.527660481	0.440593564	0.666706921	0.407071767	0.271282363	0.58396485	0.282763751	0.727172102	0.310018412	0.211773231	0.225928347	0.431857948	0.867086758	0.691657543	0.843188305	0.445724879	0.463000301	0.413356705	0.517137438	0.880949435	0.693969855	0.849862796
	780	0.253900754	0.219841117	0.403448402	0.228209994	0.352949065	0.252430686	0.232102716	0.436571168	0.463487159	0.424466507	0.425690355	0.307569644	0.559905394	0.521009854	0.630540942	0.256337749	0.122115458	0.160507067	0.23067846	0.233502846	0.281291494	0.509432134	0.727987737	0.222709707	0.127566226	0.218879218	0.594162271	0.50353973	0.723217853	0.456822077	0.214003286	0.725200116	0.331150217	0.676560465	0.38328038	0.23844726	0.30244081	0.529759889	0.947371232	0.742513965	0.95699012	0.609642454	0.563922481	0.468946815	0.585458178	0.924572122	0.837823051	0.810805645
	784	0.265769975	0.211329293	0.527883446	0.245707251	0.372479842	0.249666833	0.271410737	0.409035128	0.47342132	0.630232363	0.479947004	0.41469266	0.751277798	0.622464917	0.819069665	0.262975909	0.172332301	0.189869073	0.215720464	0.254121576	0.372814333	0.605582976	0.903916612	0.218046666	0.135850747	0.246414225	0.604909205	0.532742968	0.738037766	0.513241112	0.19718205	0.837601772	0.369011275	0.595200583	0.434846207	0.293309965	0.409111495	0.594503772	0.965292106	0.735438363	1	0.785315101	0.695210432	0.506751349	0.643649839	0.882599058	0.939593342	0.74763242
	788	0.28502781	0.239801185	0.636457186	0.266372312	0.396493086	0.259146982	0.350623852	0.39804041	0.461078951	0.830373576	0.557889793	0.582401286	0.915614857	0.673006634	0.953165738	0.334461788	0.282673634	0.303788067	0.269189727	0.282272675	0.486180526	0.647276555	1	0.220006286	0.148572305	0.285089254	0.55947238	0.527971984	0.715795118	0.566908569	0.265968463	0.892942185	0.39048678	0.522095295	0.442370242	0.371626835	0.514841251	0.605624702	0.927645532	0.680914588	0.965981655	0.917898572	0.831918215	0.50998808	0.675930966	0.772159771	0.970736698	0.677877428
	792	0.298313695	0.324460875	0.702347875	0.281375624	0.408926053	0.280242741	0.449980347	0.378914884	0.421068798	0.967332389	0.660071963	0.772154905	1	0.658888027	0.993885622	0.474307029	0.424583647	0.485637485	0.409628707	0.322810707	0.594064489	0.616454403	0.990331761	0.240082837	0.166235848	0.319734288	0.491215839	0.510747252	0.676325765	0.617592652	0.430063626	0.882015323	0.398953408	0.48276686	0.407524375	0.459988504	0.582716946	0.561451279	0.85484712	0.602477622	0.868816927	0.966117231	0.937888336	0.47541389	0.681198497	0.631498637	0.925717402	0.60921941
	796	0.299542868	0.460339353	0.71154612	0.291446884	0.397010638	0.304356625	0.541087346	0.350079722	0.372787368	1	0.76764287	0.926335526	0.976813146	0.592670989	0.934104766	0.652710486	0.560515312	0.696886567	0.61344219	0.380093045	0.664733126	0.523092103	0.889929959	0.28856625	0.195713785	0.338331604	0.447970026	0.510220515	0.641939128	0.667664417	0.65269407	0.815726526	0.401652367	0.478825544	0.349265026	0.539645405	0.588772019	0.47960454	0.767987776	0.525593504	0.734269603	0.918296196	0.976200252	0.415137373	0.668528071	0.500546766	0.82279504	0.540086338
	800	0.284645803	0.614594223	0.666212712	0.309142763	0.366826821	0.318324832	0.599695514	0.312742582	0.316794383	0.920548041	0.845386781	0.988881249	0.853419052	0.503887681	0.79585989	0.816847197	0.643737474	0.874249558	0.818207833	0.451184891	0.67481938	0.410782552	0.741882504	0.366118759	0.24782939	0.339060089	0.461967475	0.543277933	0.624448706	0.712991588	0.865842178	0.716768002	0.403920374	0.491538873	0.293309768	0.59218434	0.533102194	0.388315809	0.679517018	0.466993506	0.589457516	0.794496093	0.922666951	0.350435962	0.646352993	0.402425788	0.693600596	0.467195138
	804	0.254613401	0.738413808	0.581053975	0.35241684	0.324604757	0.310401973	0.614802148	0.276192425	0.259026513	0.75611264	0.856244104	0.927477892	0.666422535	0.4223766	0.616649204	0.913898018	0.653615443	0.960620891	0.948048011	0.521934185	0.62051754	0.315448053	0.592908382	0.458403941	0.328104141	0.331055035	0.527326239	0.601054449	0.61897505	0.738800493	0.995312772	0.607591635	0.405467585	0.495787858	0.259088399	0.605341418	0.439913475	0.313281138	0.59222944	0.429295454	0.465908522	0.634734674	0.777031239	0.302829983	0.61365804	0.337478546	0.567969777	0.398002313
	808	0.22022305	0.788852762	0.475676144	0.432345416	0.286445728	0.28892099	0.589675203	0.251475858	0.211678095	0.555138334	0.780361828	0.75277593	0.482762585	0.364193008	0.455380737	0.914652151	0.596361534	0.936969437	0.948787872	0.569775652	0.520348317	0.257235381	0.472059861	0.538329532	0.433177073	0.328566623	0.599826404	0.650574629	0.607693039	0.72476353	1	0.502001227	0.401269205	0.475253503	0.251405961	0.576743623	0.344784553	0.267068989	0.516889633	0.403058418	0.376742714	0.486838982	0.602671661	0.278791115	0.560062014	0.299106524	0.462667683	0.340803609
	812	0.202730482	0.748769384	0.367886077	0.542238138	0.275865213	0.257411432	0.535850638	0.244075718	0.187435561	0.370061998	0.628042524	0.545306663	0.34095285	0.328933922	0.332437728	0.825250744	0.498815006	0.821402772	0.814316608	0.573098433	0.407292825	0.238399973	0.394651972	0.576382549	0.548925621	0.342295473	0.620691424	0.651380704	0.582565047	0.657274021	0.887212893	0.410035621	0.386365634	0.430078496	0.260834967	0.514319819	0.276687943	0.246393218	0.453987564	0.374799915	0.32102202	0.38100087	0.435009379	0.273365229	0.488162893	0.268496053	0.379504926	0.311317172
	816	0.213242453	0.633958653	0.281455952	0.655506741	0.307849293	0.224800786	0.465337597	0.237972095	0.178585752	0.238859773	0.448633154	0.351046918	0.255506584	0.309558457	0.253916036	0.681532264	0.39403394	0.658771324	0.599607245	0.522556641	0.313993608	0.245843475	0.347168963	0.554499463	0.65080525	0.373226061	0.56965483	0.584026024	0.541999309	0.559244426	0.705842098	0.337653074	0.361012783	0.373839976	0.27154407	0.433469316	0.245195582	0.237926975	0.40650383	0.336718676	0.293916235	0.320240722	0.309167353	0.27472651	0.405981827	0.236708034	0.318975089	0.317924451
	820	0.253351141	0.483972531	0.21868248	0.735067021	0.371033788	0.201887536	0.38711623	0.227713864	0.198360617	0.164094356	0.292881906	0.213435323	0.222955895	0.293361128	0.218396694	0.530191927	0.307025946	0.499810955	0.388339554	0.427894873	0.258776659	0.250056497	0.313962259	0.476079387	0.712510593	0.412406663	0.463903181	0.479298391	0.489679439	0.45256545	0.520216161	0.282838724	0.332204675	0.323505161	0.271193339	0.352191293	0.239726439	0.228533106	0.380758723	0.294757342	0.289635867	0.29464846	0.249816648	0.272124527	0.323401528	0.211618181	0.27363728	0.353557446
	824	0.315705108	0.349782763	0.179420009	0.750229424	0.447904616	0.198201679	0.318487834	0.227790269	0.248472693	0.133070587	0.191979675	0.158265873	0.229585091	0.275234939	0.226074242	0.407722907	0.247656509	0.380671011	0.234016637	0.32768114	0.239874331	0.24158682	0.289271571	0.368654521	0.716634044	0.446232808	0.336882093	0.361236733	0.441088468	0.365765293	0.379777871	0.248165181	0.310015033	0.289709898	0.257025999	0.285883246	0.240091955	0.213854401	0.380908661	0.257333653	0.291910799	0.290721772	0.261909288	0.260379676	0.261628523	0.216022219	0.240118275	0.392302312
	828	0.38448042	0.259628333	0.165457688	0.692121899	0.510193611	0.205760882	0.261462269	0.257363121	0.318578459	0.128405486	0.163075877	0.190087936	0.24394439	0.25969309	0.255308627	0.328113261	0.212722255	0.312515722	0.163887452	0.245208746	0.240501066	0.227124759	0.279178276	0.270282243	0.662146626	0.463509081	0.24003516	0.265485462	0.4192712	0.334730303	0.300819613	0.238240118	0.300914852	0.273207668	0.235324963	0.243390183	0.230858256	0.199322494	0.392458679	0.244444292	0.294236591	0.292787064	0.29307421	0.246941788	0.250767883	0.252735468	0.22404905	0.412311234
	832	0.437973555	0.216714693	0.177126943	0.578875247	0.527304889	0.222525639	0.22053521	0.327628364	0.390097872	0.1333594	0.192947176	0.250869185	0.260058729	0.256230605	0.299515878	0.287133201	0.193715599	0.284614116	0.177724422	0.19927455	0.24114791	0.219704764	0.288461544	0.207214297	0.565104956	0.459953382	0.236000401	0.222229206	0.440555968	0.372528239	0.268321059	0.254815296	0.302670143	0.268249797	0.215753252	0.225340912	0.210344911	0.195600766	0.408711315	0.26481567	0.29700539	0.294961118	0.329361754	0.246580587	0.297723462	0.318701504	0.237571945	0.400384574
	836	0.45874519	0.207788623	0.197785666	0.44725859	0.487807538	0.24299475	0.20703837	0.434476426	0.438216573	0.139503196	0.236767081	0.315972476	0.28201892	0.268852565	0.346223812	0.268765982	0.184223075	0.276791118	0.228417801	0.194903254	0.231441512	0.241203921	0.326907143	0.191546941	0.45235073	0.438026066	0.314265105	0.246509592	0.497289474	0.443925282	0.253792707	0.284429011	0.304784226	0.268812227	0.204927445	0.225087868	0.18922086	0.209837093	0.42287395	0.311691656	0.300776704	0.304299057	0.355434745	0.269696189	0.376232296	0.398482168	0.274210596	0.363390598
	840	0.44339404	0.213937117	0.221342005	0.335089408	0.418280337	0.261161896	0.22539774	0.555583435	0.441432564	0.150812049	0.261463195	0.362753794	0.312341691	0.292567399	0.379113953	0.258038905	0.182408187	0.272698547	0.262842259	0.218963056	0.214612149	0.285804871	0.377535893	0.212998372	0.351255952	0.403278661	0.422983915	0.298391236	0.572937752	0.514029752	0.236394059	0.314635339	0.294933026	0.272327841	0.203302912	0.231835402	0.180692584	0.239581405	0.428644626	0.361490951	0.310055057	0.322414248	0.363056431	0.310051438	0.454341976	0.472059379	0.328241487	0.322602076
	844	0.401436466	0.214307985	0.238692977	0.265053399	0.339682323	0.271899789	0.257587299	0.646122092	0.396046664	0.166649282	0.260858564	0.379621844	0.347018958	0.315158513	0.381805795	0.248883515	0.188194422	0.266379203	0.270188899	0.237139483	0.202546443	0.33403118	0.414864465	0.244119357	0.280135725	0.360488364	0.514902091	0.353651912	0.642511725	0.5514606	0.214354514	0.335371957	0.267674656	0.278482008	0.206654523	0.234906906	0.189566273	0.272815882	0.426100159	0.393543203	0.323135151	0.340175023	0.356659556	0.352526626	0.500107799	0.52016707	0.392774671	0.309950038
	848	0.348902712	0.206398013	0.240446463	0.237553557	0.277769009	0.272072983	0.291424806	0.6678855	0.328342083	0.181616065	0.237985476	0.359881403	0.374209005	0.324916667	0.348699916	0.243347868	0.198611026	0.259938576	0.257519582	0.242195594	0.205422057	0.364238838	0.420525128	0.257770802	0.243227882	0.312422638	0.555561711	0.389960177	0.681026819	0.531587104	0.201326594	0.347164179	0.231344428	0.285200152	0.210261643	0.232176609	0.20772762	0.295256351	0.419847793	0.387106612	0.335225282	0.347809584	0.347823165	0.381410613	0.490915516	0.542961683	0.460082407	0.346789796
	852	0.300681112	0.197357617	0.226414754	0.235768474	0.252857853	0.263196527	0.312422175	0.610948995	0.258488364	0.189786667	0.210356924	0.314793327	0.381662897	0.316615898	0.297055795	0.242709584	0.20578927	0.25613686	0.233972782	0.233929324	0.223222777	0.365913206	0.390194352	0.250633704	0.231764076	0.269593914	0.519767887	0.397619304	0.666174194	0.471830439	0.212394436	0.356141505	0.201061629	0.289630327	0.21248698	0.222695402	0.21943377	0.298498257	0.413463739	0.344566822	0.340631108	0.341863117	0.342414207	0.383449316	0.427405138	0.553205734	0.52159683	0.429182814
	856	0.265527411	0.194513129	0.203172797	0.238543706	0.272450518	0.249245634	0.307037293	0.497878619	0.207495898	0.186248535	0.198488346	0.267631269	0.362992751	0.292898423	0.246853757	0.246676249	0.199839308	0.25253652	0.217208588	0.217199173	0.244957239	0.336182684	0.341180327	0.227216014	0.229948937	0.233280469	0.433798535	0.371947881	0.607424893	0.397766346	0.250525156	0.38121125	0.194589688	0.28681251	0.215467961	0.209836858	0.218708095	0.286045928	0.40897176	0.286290483	0.336141539	0.325677036	0.343296812	0.357078251	0.344874308	0.564410603	0.578550277	0.530421331
	860	0.245402007	0.203407279	0.184812058	0.232706665	0.307437926	0.236183824	0.282616057	0.373842554	0.189193203	0.176855641	0.211457237	0.235430966	0.323324716	0.26516608	0.238530861	0.252017258	0.18334773	0.241916872	0.215720464	0.202946248	0.25616108	0.305280888	0.31601442	0.201494145	0.222840552	0.206786604	0.34477248	0.330472295	0.5334474	0.356361	0.302786911	0.437931552	0.219954364	0.272219527	0.223046992	0.200595046	0.201858191	0.272325727	0.408777519	0.24701229	0.32115717	0.310139733	0.346163907	0.31818	0.295635295	0.579935202	0.632095426	0.617523051
	864	0.238021765	0.221615549	0.184548189	0.218192615	0.344478664	0.225923797	0.249870192	0.284892496	0.207293261	0.172768628	0.243269116	0.226155922	0.276995765	0.259194836	0.286610694	0.254610868	0.156779818	0.224312401	0.224967211	0.20443565	0.249667407	0.307760611	0.349454273	0.191684346	0.202763638	0.194272738	0.288325969	0.292998258	0.471679898	0.382853789	0.348234719	0.524125579	0.26950342	0.256812098	0.237953967	0.202438624	0.176087864	0.275157652	0.415419621	0.256918816	0.309211816	0.309994666	0.342871334	0.286247348	0.313677121	0.590613965	0.678190646	0.659783358
	868	0.239969558	0.244550765	0.206537208	0.206237175	0.374392461	0.218585858	0.224873378	0.256619456	0.243097489	0.183004594	0.278463797	0.238366002	0.24881317	0.288137293	0.380208623	0.25302414	0.128606024	0.198077207	0.234450288	0.221226331	0.232310523	0.361373779	0.447604038	0.206234685	0.17595698	0.199217756	0.2813619	0.275049953	0.450401851	0.484041361	0.371301202	0.617318422	0.321117092	0.262327691	0.260333368	0.213612659	0.161434943	0.305671956	0.434759744	0.321262619	0.321398328	0.329918845	0.332104164	0.274253852	0.398894803	0.582165866	0.706843037	0.645848969
	872	0.248172773	0.269028566	0.24096499	0.209516437	0.394574983	0.215111071	0.220031639	0.285187662	0.278026415	0.207580136	0.302273029	0.264375595	0.258805431	0.347790103	0.490327412	0.249582855	0.116678609	0.171185137	0.237781004	0.24388221	0.222690228	0.454356497	0.581631742	0.2358419	0.148458148	0.211212454	0.314151914	0.287067183	0.475068752	0.625294416	0.371203218	0.68451222	0.353339554	0.307184197	0.288186985	0.231332976	0.174125616	0.361164889	0.47523372	0.418256873	0.376490339	0.361812725	0.325683057	0.283331197	0.519781776	0.546624434	0.706631372	0.586182601
	876	0.25942825	0.293056515	0.273979657	0.229246109	0.403885306	0.217617538	0.234966397	0.345050211	0.298137477	0.236284727	0.3082534	0.287339271	0.312538446	0.421384627	0.59108795	0.249667359	0.134539393	0.167897862	0.237866097	0.264038812	0.240798564	0.549312858	0.700264521	0.267521074	0.132259139	0.224046458	0.351321911	0.320085999	0.527597619	0.772911363	0.361184977	0.699061041	0.352350763	0.396541586	0.318600512	0.249729048	0.210437924	0.424860712	0.54204329	0.51169602	0.479384234	0.391249961	0.344757094	0.304540907	0.634947968	0.48928515	0.671561502	0.504552293
	880	0.269420645	0.312555999	0.291129463	0.254850102	0.408700115	0.226493559	0.252285675	0.407363029	0.300910812	0.254476753	0.299855164	0.298719965	0.398326566	0.492184058	0.643055924	0.255943632	0.176094792	0.201983255	0.243825289	0.277812581	0.295570801	0.602249483	0.754738227	0.290991824	0.13543555	0.231153626	0.366133602	0.358579541	0.578289523	0.882550358	0.358710087	0.654808415	0.320097733	0.517367181	0.348183345	0.261349914	0.261726053	0.47289537	0.629707061	0.563648408	0.613411098	0.409084531	0.40684475	0.325596796	0.702076739	0.426082308	0.605579275	0.425705023
	884	0.273048802	0.325649379	0.285681798	0.271276982	0.412534919	0.24356078	0.262821304	0.456871445	0.293258353	0.252438562	0.285735875	0.297318627	0.493986882	0.534709426	0.635451033	0.26492785	0.233943287	0.266570542	0.26265551	0.283058283	0.377917828	0.586226246	0.722899967	0.299815196	0.157351489	0.229891545	0.357622481	0.392614329	0.607118571	0.926591684	0.373796262	0.569154257	0.271933742	0.631820315	0.372290429	0.260294398	0.313685069	0.48507596	0.718932571	0.55518506	0.742338908	0.420069915	0.511395058	0.337827231	0.703664977	0.373382383	0.52167465	0.368605448
	888	0.267022331	0.329762444	0.262449492	0.269668957	0.413720565	0.268257315	0.26382167	0.496814245	0.286395359	0.232130925	0.273356957	0.287102288	0.569837792	0.538384839	0.57962676	0.270974904	0.294266166	0.34830926	0.292373529	0.284197696	0.463589258	0.506104494	0.61966359	0.296582908	0.18408632	0.22177616	0.335673598	0.415820114	0.598194578	0.901825913	0.40345817	0.473425486	0.228943964	0.696086207	0.384254863	0.247114804	0.347491735	0.454077874	0.781987283	0.499771591	0.823419177	0.441654246	0.633720255	0.339353275	0.648987125	0.337793151	0.436229141	0.332774562
	892	0.254437788	0.323518505	0.234603815	0.251056387	0.408789274	0.295608922	0.259983001	0.539853401	0.29909888	0.206603459	0.265323328	0.27345309	0.605545156	0.507949063	0.499980179	0.271024152	0.338074214	0.425404138	0.321978489	0.286536321	0.524347285	0.395900235	0.488595799	0.288641258	0.204631386	0.21306307	0.31329091	0.421220359	0.557370433	0.826077013	0.435431481	0.39656304	0.202575995	0.682236196	0.37647045	0.228821909	0.352873698	0.388621824	0.795332051	0.433336253	0.826442612	0.492415738	0.732917473	0.333539747	0.562839504	0.313632745	0.362379217	0.311478072
	896	0.238658944	0.309554877	0.216123628	0.22634036	0.398104	0.318106212	0.261384956	0.592488561	0.336154771	0.19202205	0.260211679	0.270017656	0.597871923	0.457437683	0.422671507	0.266360697	0.353565062	0.467915744	0.33834991	0.290169634	0.541081479	0.300338682	0.379659145	0.281550593	0.206245055	0.211818816	0.305780614	0.414905218	0.507415732	0.727645788	0.457613973	0.351858039	0.194477482	0.593255463	0.343948393	0.212175498	0.331212258	0.309749795	0.7527461	0.394804043	0.749227643	0.576910169	0.770962048	0.324923865	0.471612646	0.290050255	0.306492649	0.299175764
	900	0.227705642	0.295190313	0.214241858	0.214939197	0.3884136	0.329066141	0.274346146	0.644586992	0.384554163	0.197197522	0.256051123	0.28414674	0.559203183	0.403431327	0.365977899	0.263636483	0.339286279	0.464803169	0.335031541	0.289856579	0.511621592	0.251327678	0.325293304	0.275035153	0.191474807	0.221027233	0.314275263	0.405926767	0.473907647	0.633860264	0.465830184	0.334022	0.197226651	0.46448136	0.297402025	0.204931737	0.29255254	0.243580748	0.670550357	0.404960106	0.620514559	0.677042883	0.732684121	0.315954376	0.393677921	0.26245646	0.269278043	0.301934311
	904	0.2284345	0.28916804	0.226008977	0.228604209	0.38933667	0.325398678	0.294754195	0.671892247	0.420358664	0.217368602	0.252913362	0.313902184	0.509663778	0.35866914	0.335903164	0.271027606	0.302508702	0.422459281	0.316453803	0.279603704	0.449493135	0.252781368	0.327264713	0.264055131	0.165337122	0.236554632	0.328899228	0.402178843	0.472934567	0.563591737	0.464255764	0.32704481	0.201700295	0.346625177	0.247269732	0.210413999	0.24950936	0.202250615	0.580515458	0.455316548	0.487335005	0.756846039	0.634778525	0.30653347	0.337952016	0.232432514	0.246540847	0.324783746
	908	0.240819925	0.295862161	0.240595982	0.261129952	0.405655747	0.308890693	0.308965013	0.650333406	0.422496982	0.236503659	0.252341242	0.349283774	0.466180326	0.328577206	0.327493834	0.289801977	0.254703778	0.359494706	0.294458909	0.258520334	0.375356378	0.281992274	0.360249382	0.247265976	0.138186857	0.249850439	0.338879694	0.406861099	0.504132068	0.525013427	0.458737782	0.316644866	0.2021294	0.273805373	0.205082903	0.225558267	0.215490603	0.188462061	0.513532414	0.513206285	0.39254058	0.779418909	0.517813744	0.295869165	0.306279568	0.21223112	0.235102846	0.369563995
	912	0.254882814	0.310941469	0.245772917	0.293627681	0.431162017	0.285213144	0.305164948	0.572771262	0.385502677	0.237067377	0.254411302	0.376835345	0.434539755	0.311529433	0.329801199	0.311586779	0.206966454	0.296565381	0.27959982	0.233457786	0.306872516	0.305831461	0.388826683	0.225811789	0.124281666	0.253528264	0.341287483	0.41675521	0.551966728	0.516819776	0.448912984	0.298919069	0.202617627	0.257483129	0.183711899	0.242204016	0.194036544	0.19315124	0.48337536	0.540266059	0.35429668	0.726843067	0.425189002	0.284489022	0.303159868	0.227537103	0.241242274	0.426522664
	916	0.262507672	0.322318663	0.235588134	0.308735586	0.44958719	0.261291535	0.284626485	0.457118713	0.323615593	0.215194665	0.255565262	0.385471561	0.408817905	0.301943549	0.331609324	0.322778753	0.169094718	0.24741716	0.273562669	0.212430599	0.255604877	0.305713878	0.389724394	0.203746652	0.131988494	0.246112989	0.342217402	0.423364163	0.594015526	0.530397461	0.42619682	0.279974838	0.207919197	0.279718579	0.189519011	0.254439418	0.183770945	0.203889911	0.480552019	0.513938692	0.358980579	0.611338722	0.381039116	0.274886112	0.329408234	0.274896278	0.262395651	0.47713703
	920	0.26056595	0.316991296	0.215041853	0.295667067	0.443629644	0.24257872	0.251880024	0.344947751	0.2627188	0.178602618	0.250003775	0.371080408	0.378285599	0.294304949	0.325716521	0.313953025	0.144143053	0.215702778	0.268406849	0.203135069	0.222029692	0.28145747	0.365298922	0.191610264	0.15128444	0.232873401	0.350471312	0.417074046	0.611754343	0.551889767	0.380359095	0.267598029	0.219017855	0.305567391	0.207289666	0.257043998	0.180852612	0.206491158	0.480402279	0.4399535	0.371730413	0.476360806	0.380002721	0.269057413	0.379302876	0.330620377	0.290733017	0.496311578
	924	0.24709278	0.290120926	0.190926799	0.263819836	0.407121241	0.231643574	0.22064106	0.263327309	0.22218712	0.140885288	0.234523448	0.338173936	0.33738216	0.286143724	0.31078924	0.28800627	0.132572468	0.197907063	0.25800547	0.21183165	0.201018905	0.247177438	0.327750464	0.198198772	0.171481292	0.222309291	0.369365308	0.392879459	0.598573047	0.564963963	0.316088943	0.265692744	0.230290067	0.310012147	0.221959864	0.249790445	0.181273238	0.20015347	0.468664033	0.34891619	0.3727542	0.363781753	0.394670369	0.267745957	0.436800031	0.368496454	0.31764031	0.470708874
	928	0.227868868	0.250410797	0.176732753	0.226921605	0.352198286	0.228461603	0.210460747	0.227232228	0.21230849	0.118411396	0.212237591	0.298135578	0.292264099	0.278052465	0.290802026	0.260753835	0.132320034	0.188598798	0.238003446	0.230036148	0.189220309	0.232654191	0.297326173	0.220051598	0.182604311	0.220709648	0.393205112	0.354722424	0.561552808	0.555486997	0.245895469	0.270470561	0.232829972	0.29115448	0.226003612	0.237269572	0.178762801	0.188521774	0.438408591	0.274697805	0.347093508	0.297381194	0.395641814	0.269781162	0.480042701	0.370737033	0.336223908	0.412351656
	932	0.214981244	0.211590652	0.184183213	0.208925956	0.29830826	0.231625969	0.226616708	0.238664372	0.231436924	0.127441367	0.193592891	0.26354818	0.253028518	0.272151599	0.272278769	0.252267111	0.138573612	0.184147848	0.211598832	0.243705356	0.186750441	0.253191942	0.289383325	0.24806086	0.178135162	0.228350655	0.410939647	0.315196862	0.516846915	0.517712874	0.187096742	0.27309264	0.225166259	0.261320369	0.216626441	0.226267658	0.173624381	0.179845871	0.399051738	0.243702609	0.302840979	0.280297499	0.373913838	0.273423664	0.485795712	0.328028982	0.33874199	0.346768776
	936	0.222265766	0.195123069	0.212788083	0.223571995	0.265879552	0.239248668	0.25447689	0.275096387	0.258515567	0.160542032	0.195326474	0.246884491	0.234076388	0.272613438	0.25959289	0.273628596	0.143449019	0.18434086	0.196387592	0.245676496	0.198566293	0.297820878	0.303400751	0.272982409	0.162378129	0.23966747	0.413830949	0.285698429	0.481550914	0.460370841	0.17425307	0.266763506	0.207735203	0.251264292	0.197717753	0.2219738	0.168223588	0.183898289	0.371518778	0.25838759	0.265099863	0.300398971	0.33700118	0.27765401	0.44787026	0.270116569	0.334267469	0.311510581
	940	0.245504912	0.213945636	0.249871754	0.264712754	0.279152221	0.248908971	0.279426623	0.301904492	0.273921879	0.195961875	0.223520238	0.252192824	0.250101158	0.279265042	0.258535517	0.317684179	0.144183365	0.18759626	0.211004742	0.236966238	0.219993256	0.343089536	0.322145729	0.284980205	0.143084163	0.247043271	0.401035863	0.279173063	0.466287554	0.399160606	0.215229396	0.260375559	0.191447108	0.277423722	0.181522889	0.224978501	0.17203963	0.2028138	0.378526908	0.294218437	0.259299358	0.327282591	0.313673021	0.283247853	0.382364296	0.238025038	0.33868734	0.32765132
	944	0.275107845	0.257888129	0.28253348	0.308585685	0.327013663	0.257139162	0.288680498	0.310033407	0.274580218	0.215336871	0.269195933	0.274665933	0.289156649	0.28835088	0.268174021	0.36080128	0.138175514	0.190210165	0.252204796	0.222269914	0.242232432	0.370248846	0.332083861	0.280317403	0.130103669	0.245569245	0.378935584	0.296017588	0.471905501	0.366137865	0.285869213	0.2717025	0.190439845	0.327885974	0.184414317	0.230779637	0.188313071	0.229137985	0.417616473	0.318684849	0.294635002	0.344290704	0.326211371	0.289942142	0.323217645	0.260301944	0.365959105	0.393649451
	948	0.297479366	0.301793586	0.294973028	0.337998725	0.377891044	0.259652585	0.276214672	0.302178873	0.266278855	0.209839476	0.310833474	0.30232829	0.325425519	0.295902563	0.284988455	0.376105353	0.130960167	0.188880057	0.303296748	0.21603738	0.254742705	0.365351407	0.327603296	0.263725193	0.129052985	0.235724424	0.355258158	0.321227825	0.491332544	0.384247575	0.351586958	0.314364654	0.210843271	0.376308072	0.21158607	0.232524731	0.215065988	0.251652297	0.464109315	0.315617026	0.350988772	0.354248129	0.373137827	0.294636683	0.306954078	0.335792131	0.419843777	0.486883046
	952	0.301785655	0.324348136	0.278224477	0.33765955	0.405678164	0.253110108	0.248264702	0.282127363	0.255579041	0.179734885	0.325087877	0.322253154	0.339098281	0.301377774	0.306870345	0.351083149	0.134036852	0.185634872	0.341399628	0.229257906	0.252548819	0.338932349	0.317583343	0.243775036	0.139529602	0.223220572	0.336096203	0.335093163	0.515027985	0.460469092	0.386849098	0.392636111	0.241682875	0.396990638	0.247638761	0.228144877	0.244693697	0.261739522	0.491048161	0.287405389	0.397916272	0.365761741	0.426785174	0.295262024	0.354422232	0.434088645	0.491456495	0.579631151
	956	0.283216016	0.310727476	0.239773554	0.308327421	0.401112112	0.240079377	0.22686442	0.26291303	0.25296486	0.146804782	0.297917639	0.323152443	0.322830756	0.307042652	0.33796774	0.298742872	0.159850743	0.18974253	0.343315997	0.262458206	0.234820225	0.317878657	0.321815273	0.227502504	0.150064249	0.213533919	0.319467518	0.330357104	0.5368994	0.580163542	0.370075984	0.498479541	0.269222738	0.372070476	0.273397845	0.216086615	0.266991104	0.253952891	0.48546007	0.256583023	0.41444999	0.379525334	0.460055503	0.288515845	0.459918595	0.513857485	0.564266497	0.642156272
	960	0.253889024	0.266002469	0.200701277	0.26686259	0.361742013	0.224092725	0.233947269	0.256619456	0.258499699	0.145596929	0.2432214	0.305062138	0.282994233	0.321588228	0.382719452	0.254449026	0.214135807	0.218164086	0.303587745	0.305258464	0.220047093	0.329039038	0.36020878	0.217105678	0.154694014	0.210446671	0.304048072	0.311076611	0.55761688	0.719687176	0.320497784	0.608485737	0.278483035	0.316257145	0.276115407	0.204135221	0.268828704	0.236509066	0.453740361	0.255963268	0.403891366	0.391506167	0.454469774	0.272525394	0.594160935	0.547732644	0.623147075	0.664701561
	964	0.232776674	0.220454258	0.188026381	0.234178191	0.312659544	0.215149186	0.282369965	0.269973211	0.2630255	0.203886585	0.19862846	0.280101911	0.255352208	0.354793227	0.449005138	0.258720626	0.295029959	0.2866408	0.246787445	0.34217706	0.230813661	0.382879347	0.443407312	0.210597332	0.153842043	0.213900859	0.299381056	0.300440773	0.583771926	0.842615392	0.280693339	0.696044926	0.264844135	0.268249797	0.25412305	0.205135207	0.251782581	0.228291883	0.422837329	0.305766666	0.379513305	0.392786166	0.422304386	0.257307155	0.719408118	0.537982599	0.661293808	0.653345467
	968	0.234287359	0.211329293	0.222831912	0.224036073	0.288079562	0.222867043	0.369234187	0.306329676	0.257107093	0.32878407	0.209622146	0.269238851	0.278712476	0.410639938	0.538558058	0.33487069	0.387005202	0.398625618	0.215720464	0.3610699	0.281075928	0.466248508	0.562149093	0.205562877	0.153973636	0.221053004	0.325293245	0.33204436	0.62345665	0.9267106	0.2928835	0.746311486	0.240361161	0.270520677	0.22117918	0.230144099	0.231252556	0.248144151	0.435879392	0.400754017	0.386897239	0.376809993	0.402972317	0.260623539	0.807735108	0.512846043	0.680417643	0.621633704
	972	0.259152505	0.26463485	0.309301152	0.237269421	0.301010226	0.250488639	0.481838149	0.367456202	0.241397732	0.501094553	0.306120736	0.29419762	0.373172087	0.482194924	0.64082289	0.47404621	0.467872481	0.53812844	0.251199716	0.359266329	0.366472433	0.548222387	0.687115139	0.203158538	0.16046831	0.22785482	0.40038645	0.428780226	0.68056666	0.966583405	0.374302512	0.757095822	0.228237346	0.345328005	0.208014527	0.279426898	0.231707652	0.305322745	0.516603416	0.511259062	0.459814861	0.350062392	0.439427136	0.293565187	0.851785084	0.505871329	0.684608518	0.580584323
	976	0.293395872	0.381683186	0.430217925	0.264439382	0.33917553	0.288955673	0.595707507	0.45179985	0.230838954	0.680649506	0.48373376	0.367455883	0.526051308	0.551487875	0.732412857	0.636535498	0.517630132	0.671895938	0.370585566	0.344185147	0.463693344	0.595468504	0.780727582	0.209417659	0.17689214	0.232738251	0.532908071	0.586572577	0.750715898	0.971170446	0.506254275	0.735258353	0.249569041	0.480697985	0.238139374	0.34756927	0.275377863	0.394048164	0.652627616	0.597457108	0.597533204	0.334349318	0.550699155	0.355679369	0.862371631	0.531774309	0.673126	0.533955722
	980	0.316509086	0.537111028	0.552021563	0.29472346	0.374501388	0.325358301	0.687571163	0.55018741	0.248909894	0.820607551	0.700529554	0.484748735	0.694037118	0.595642997	0.78437025	0.769167633	0.526665263	0.761444869	0.556297763	0.328688868	0.54005636	0.588477447	0.81342716	0.232744676	0.197757443	0.234623408	0.705783769	0.770186837	0.820899112	0.954266695	0.643514463	0.689498815	0.310122343	0.634629713	0.313865906	0.417825806	0.369572332	0.494947823	0.798851819	0.6289653	0.760934392	0.356670573	0.716312754	0.432738166	0.855823495	0.574877292	0.638459795	0.48131339
	984	0.31436448	0.689160573	0.637948344	0.325105717	0.386928069	0.343612369	0.740174263	0.643615005	0.314566858	0.884863217	0.892384255	0.623965495	0.821487175	0.597005617	0.774909076	0.829570469	0.499090183	0.779546456	0.760519524	0.324369666	0.568615845	0.53007292	0.776355428	0.27892221	0.210945265	0.232733067	0.874376886	0.924998553	0.87332545	0.924667197	0.738547685	0.625381579	0.395206591	0.755453707	0.413714906	0.470103705	0.49959067	0.582706783	0.899695072	0.5992119	0.890366523	0.43163996	0.882885547	0.495226413	0.840377283	0.598234794	0.572232321	0.425519137
	988	0.289240035	0.796938679	0.663378765	0.363822941	0.373166594	0.336227583	0.746589089	0.707533254	0.429416077	0.861287428	1	0.75167259	0.865865607	0.55227844	0.701340135	0.804353058	0.449596787	0.722617165	0.924023185	0.336612844	0.54083472	0.442406036	0.684450481	0.346497436	0.206695987	0.227832188	0.984915743	1	0.891934131	0.8822636	0.766118873	0.546039223	0.475926296	0.807125219	0.502810694	0.489654898	0.631956623	0.636125661	0.917701557	0.527215164	0.935514563	0.54771072	0.989904816	0.515033349	0.811026793	0.568075422	0.475344908	0.37786635
	992	0.260632759	0.83630709	0.625822096	0.425495857	0.360174019	0.310374573	0.712503891	0.722494572	0.572895409	0.765188806	0.994156192	0.834871143	0.817088707	0.475532697	0.584170577	0.712046427	0.395751392	0.612262726	1	0.363544233	0.470077886	0.355070353	0.569001539	0.42519704	0.187212164	0.219621604	1	0.97077686	0.868819908	0.822096524	0.733856687	0.457080228	0.523230073	0.785543499	0.550274769	0.472614324	0.727326803	0.645710441	0.852273541	0.446460873	0.880637791	0.667414853	1	0.48426903	0.756016453	0.477904068	0.370218726	0.355586187
	996	0.255688689	0.80730945	0.54435019	0.520379324	0.387241098	0.286058591	0.65601148	0.685418387	0.708678036	0.631553253	0.886524392	0.852874679	0.700704507	0.392810202	0.459912427	0.590466156	0.350036722	0.485059141	0.971656992	0.3982866	0.384248611	0.291318778	0.463903012	0.498331999	0.169907234	0.210592657	0.919052244	0.850609361	0.80771577	0.742774047	0.67319196	0.370566354	0.52159758	0.717251063	0.543727963	0.426228674	0.756943144	0.615427793	0.738176783	0.387425905	0.751333946	0.743594951	0.916336017	0.423725769	0.669843793	0.362173229	0.27950843	0.371948545
	1000	0.294136749	0.730604057	0.448791382	0.643841294	0.480714584	0.286211028	0.603665912	0.613538787	0.799063941	0.499605359	0.7211002	0.803959684	0.563624613	0.330500305	0.365266795	0.476686408	0.31578647	0.376090787	0.855992205	0.432219546	0.311826264	0.259462671	0.392498167	0.548106649	0.180651562	0.20833842	0.781030459	0.683827669	0.722883288	0.652594192	0.617262391	0.303382773	0.474767276	0.641966737	0.493109565	0.363973047	0.7142793	0.558464757	0.625356917	0.36324311	0.599751374	0.743318057	0.777715343	0.375434103	0.56288142	0.264351412	0.233468306	0.425015293
	1004	0.37602234	0.635705251	0.364639367	0.772477429	0.633257847	0.323498645	0.582098474	0.536682828	0.819792912	0.396804276	0.55162371	0.703999486	0.450559637	0.303257604	0.320549481	0.39107135	0.288628933	0.304951983	0.693310854	0.457159248	0.268946926	0.252854229	0.360845465	0.561493045	0.239542864	0.222861693	0.646169247	0.524873786	0.633769394	0.568283735	0.580189823	0.269701089	0.401096272	0.589483102	0.42265292	0.304305287	0.616096942	0.489920588	0.552271499	0.365670061	0.477371623	0.665599223	0.635504982	0.381298967	0.459855266	0.226299644	0.244318607	0.493214056
	1008	0.479243399	0.547324035	0.302059022	0.870020242	0.800985215	0.391294042	0.60685841	0.481063853	0.76799555	0.329707222	0.417434898	0.578339589	0.383993512	0.307757901	0.321207303	0.333928154	0.261774637	0.271029012	0.528782259	0.466041863	0.254147061	0.256911386	0.359386819	0.534371027	0.346950708	0.260431387	0.565764673	0.413993851	0.557727446	0.506499153	0.550736654	0.272327168	0.322473515	0.56432609	0.356781535	0.25905081	0.493038819	0.420633265	0.5280637	0.372513254	0.410935528	0.542150892	0.527031583	0.458656997	0.3871034	0.257737657	0.299099202	0.542523839
	1012	0.568587209	0.47630925	0.260845529	0.901134225	0.921728577	0.464604304	0.673090523	0.454207163	0.660383753	0.285774611	0.330153934	0.451469341	0.357894237	0.325601274	0.342135605	0.299850817	0.231462725	0.259233585	0.395311196	0.453286196	0.252740814	0.260826735	0.370676996	0.472650965	0.478393941	0.321977066	0.556557032	0.361933972	0.506524743	0.473608045	0.50374967	0.299594231	0.261499918	0.546688997	0.308650869	0.228189487	0.375557431	0.355189158	0.53290483	0.361487052	0.394253906	0.420440641	0.461111113	0.586781261	0.356641676	0.330682132	0.359985581	0.542994841
	1016	0.611681201	0.418868963	0.232092792	0.84694266	0.945263643	0.511403378	0.753742618	0.441103318	0.524256697	0.247823839	0.278489378	0.353035073	0.347140452	0.333764877	0.352459827	0.274793543	0.199263634	0.25151626	0.30511924	0.416193645	0.248391006	0.258427085	0.378392715	0.39034523	0.592364139	0.398285064	0.594189732	0.350721529	0.479587564	0.46104442	0.422362363	0.331340588	0.221362227	0.508447581	0.277480797	0.208308607	0.282958365	0.29437901	0.534683596	0.333950251	0.398654875	0.339069271	0.42262125	0.713305203	0.358001435	0.390932437	0.400483691	0.489671765
	1020	0.593581074	0.363465756	0.204631105	0.714880796	0.858993658	0.50873173	0.808467425	0.41514014	0.396492632	0.20998215	0.247377573	0.285311254	0.331322614	0.327208592	0.339485191	0.252474813	0.170304542	0.236937872	0.254688642	0.357387512	0.236616862	0.250544521	0.373316996	0.308208742	0.647949627	0.470455083	0.629446951	0.348700642	0.468776193	0.450290511	0.326124386	0.351250332	0.197601174	0.439401979	0.254700023	0.196995689	0.222958838	0.244557683	0.510810442	0.294391653	0.393957244	0.309994666	0.390499755	0.7786467	0.364328215	0.405413564	0.404808554	0.40765521
	1024	0.522646921	0.308910603	0.177283441	0.537853377	0.694799638	0.454780988	0.80085559	0.370684364	0.298201786	0.168588999	0.219519786	0.24441356	0.303436459	0.303706535	0.305180686	0.23603854	0.150317557	0.217302434	0.229452853	0.29535467	0.217282632	0.244862754	0.357488398	0.243971069	0.62334358	0.517203789	0.617827561	0.33962154	0.464077331	0.431660439	0.23256281	0.357774588	0.185165475	0.354065422	0.233391765	0.189860809	0.189231387	0.205901386	0.467765442	0.25547289	0.370635357	0.317510514	0.357318483	0.745997287	0.358827895	0.368440231	0.386749962	0.329571889
	1028	0.425231601	0.255943896	0.165008051	0.373674543	0.513248336	0.370065939	0.716166784	0.308147606	0.234427311	0.132209377	0.191414819	0.225881578	0.267084813	0.272341744	0.263310686	0.232080546	0.140356273	0.198992478	0.215346605	0.240267703	0.197732754	0.249060324	0.336568081	0.2049279	0.525546077	0.523063637	0.545384962	0.314442693	0.458598874	0.399312614	0.176111453	0.365823687	0.185846764	0.276394043	0.214094685	0.192703767	0.17589006	0.186286191	0.420823537	0.233220941	0.335637011	0.333154311	0.3292821	0.620649354	0.329510013	0.310834392	0.380269504	0.2983173
	1032	0.332640716	0.21011094	0.178139094	0.254028858	0.373929469	0.287491463	0.570041061	0.247791465	0.204338281	0.116387354	0.176749747	0.231654551	0.236897953	0.253165802	0.241652481	0.241903353	0.137643083	0.187773184	0.208808428	0.205217848	0.189272917	0.264647383	0.316367268	0.193070745	0.386318694	0.484526035	0.438517265	0.28124432	0.457062002	0.368200635	0.179844161	0.396948446	0.195908565	0.244506003	0.203302912	0.211218391	0.179230536	0.192033762	0.3967315	0.239267871	0.306197333	0.335853562	0.322084015	0.461898282	0.294526309	0.280622592	0.417950035	0.336513545
	1036	0.268084926	0.189053589	0.215894491	0.201825045	0.308064321	0.233782057	0.414307318	0.226333389	0.207979806	0.131739472	0.189609175	0.248824409	0.227267904	0.263998027	0.259902409	0.261584251	0.137788478	0.185449014	0.213316082	0.200491931	0.197157881	0.291753655	0.307129749	0.201188217	0.259354067	0.411225945	0.342537366	0.266651533	0.470221909	0.366235055	0.236628133	0.46342281	0.217042156	0.278889382	0.206508022	0.243687514	0.196473375	0.222736212	0.409465005	0.26222101	0.298445124	0.323990689	0.342935248	0.321110956	0.292342362	0.31306568	0.508688802	0.430793019
	1040	0.237301718	0.204538543	0.267089388	0.212851004	0.307613139	0.218270224	0.288959447	0.264673427	0.230475395	0.163036787	0.224583533	0.277094078	0.242560269	0.300568853	0.313558065	0.282335878	0.13769719	0.189197374	0.23027528	0.224774754	0.214771011	0.329227652	0.319453943	0.213829735	0.170025079	0.329900725	0.301175585	0.28925736	0.509050695	0.416612008	0.300320009	0.556336494	0.244114186	0.363329508	0.221489286	0.281047584	0.219207578	0.263807693	0.450648957	0.295876442	0.312772079	0.312225434	0.380721203	0.245482305	0.35648629	0.408276873	0.628459609	0.538921321
	1044	0.231577986	0.245713036	0.311675654	0.260164125	0.335369745	0.229539748	0.219606912	0.338914143	0.258243499	0.194521711	0.26960274	0.308965115	0.268467002	0.358071269	0.388225544	0.296856722	0.136158521	0.192194094	0.257415794	0.256120185	0.238893725	0.373146928	0.359707445	0.221372987	0.127283465	0.260773098	0.330111973	0.340581085	0.578040065	0.516856347	0.343727417	0.646060822	0.266261287	0.454656369	0.237234186	0.311365821	0.238544974	0.303404273	0.488252242	0.336043509	0.330144148	0.3165871	0.40894359	0.249349137	0.485375459	0.52977628	0.730423456	0.62357558
	1048	0.237193364	0.293917045	0.326660659	0.296802462	0.354493783	0.244906344	0.209426978	0.41388464	0.281499405	0.210825853	0.306001583	0.332054142	0.291741928	0.426695533	0.469220015	0.30367373	0.135114707	0.191621162	0.285788708	0.280797374	0.269009371	0.419432463	0.431906701	0.220156154	0.123011926	0.214492872	0.409485965	0.407173486	0.672000811	0.651179785	0.347023427	0.696011306	0.270443767	0.514574795	0.243309868	0.319820033	0.241451252	0.324157006	0.500504253	0.380164239	0.33602207	0.33931634	0.408000346	0.308979149	0.657739372	0.624430188	0.769000746	0.652601313
	1052	0.242189661	0.328796969	0.30385025	0.305882755	0.347847278	0.249968512	0.23623606	0.451656332	0.291043377	0.205216542	0.314977782	0.332130524	0.305029259	0.491118614	0.537696382	0.301477707	0.135980195	0.188371886	0.299815078	0.286381518	0.306424007	0.463417565	0.533515229	0.209518355	0.139412665	0.194455624	0.493903982	0.471144587	0.768976062	0.785370119	0.316843908	0.682130722	0.253656598	0.512410045	0.235614404	0.304334297	0.228813076	0.315812987	0.480997312	0.425870307	0.323553018	0.364859358	0.377154304	0.365460886	0.824794536	0.651453526	0.724004507	0.622215655
	1056	0.240393506	0.328464719	0.256853133	0.287295197	0.315097188	0.23800791	0.256602733	0.426866658	0.279875559	0.181155261	0.291324127	0.307472864	0.31218802	0.538737409	0.583996125	0.29646188	0.137721534	0.184001299	0.290514351	0.270701522	0.354622302	0.498916284	0.64632565	0.195485172	0.147014829	0.197968536	0.543149047	0.510696099	0.844804268	0.883114694	0.28456032	0.606503808	0.225728045	0.451445493	0.214895892	0.273764693	0.201742507	0.280932405	0.436583746	0.47052035	0.303796831	0.373040667	0.341316452	0.389860656	0.933792664	0.603280656	0.610915951	0.555772869
	1060	0.23381324	0.295439221	0.209923894	0.249977732	0.27764315	0.215356463	0.259534468	0.353326936	0.253514388	0.158302824	0.249071963	0.271830725	0.320549435	0.563672694	0.607103565	0.29222762	0.137188938	0.178703145	0.262892566	0.242579709	0.414071929	0.518272437	0.741766539	0.189148623	0.144400847	0.208393796	0.536474943	0.519949838	0.879683403	0.923484962	0.286245447	0.496757971	0.200585494	0.367942426	0.192737005	0.242237483	0.172874204	0.23544508	0.398311178	0.506580862	0.303715802	0.356257424	0.338606447	0.371014491	0.954979442	0.506751074	0.471820723	0.488414881
	1064	0.227596006	0.24414282	0.185781613	0.215663196	0.268410327	0.200549319	0.245484608	0.273872921	0.223150226	0.154571072	0.211825751	0.249538658	0.346235203	0.565702575	0.609838007	0.28749171	0.131409459	0.174281806	0.225276906	0.216391096	0.476600916	0.514183406	0.789587162	0.19514844	0.135979087	0.216692823	0.482228207	0.508171337	0.865535099	0.907326606	0.339810017	0.391476267	0.192328921	0.312229701	0.188101277	0.22096757	0.16325503	0.198988425	0.401802147	0.521044632	0.350812158	0.318862529	0.397166428	0.326073611	0.892602003	0.405284307	0.35303414	0.446954802
	1068	0.225047328	0.203626666	0.191010544	0.207977796	0.300540826	0.21085854	0.226554984	0.248078608	0.202940811	0.1730798	0.19862846	0.263607953	0.398780328	0.547937222	0.594596573	0.279338631	0.125277184	0.177465799	0.200226186	0.208384668	0.524640405	0.482887933	0.770330275	0.213554923	0.129698423	0.221178108	0.409009323	0.491505701	0.808658035	0.852215374	0.433170264	0.320317268	0.204269742	0.321911759	0.210029243	0.212763628	0.185545327	0.191787356	0.468608065	0.500700172	0.453457028	0.293232922	0.51560298	0.277593785	0.778682595	0.333791246	0.282819765	0.436517309
	1072	0.227685628	0.200719847	0.213331256	0.235580998	0.362418356	0.242180703	0.221107485	0.309207843	0.216965684	0.199202917	0.212938653	0.32286875	0.473069188	0.515069025	0.562939131	0.269457843	0.130113399	0.199838043	0.207487766	0.225904596	0.537263021	0.427207145	0.685770763	0.237891762	0.132472162	0.220932527	0.347721596	0.482272803	0.726585214	0.780339649	0.530336884	0.29051068	0.226613932	0.40165253	0.25477259	0.212653817	0.227776979	0.224813935	0.588852179	0.440750282	0.600153355	0.315055867	0.659806734	0.252606671	0.654409495	0.301396663	0.261478151	0.440964398
	1076	0.235282608	0.24109799	0.230321429	0.279401728	0.435356961	0.284348562	0.236497351	0.448213909	0.262725402	0.21066337	0.241345124	0.415583096	0.550130587	0.472632957	0.518411886	0.268010889	0.158838959	0.255792919	0.249296119	0.262008131	0.500601556	0.359847271	0.561194912	0.259095471	0.145942942	0.215796198	0.315689658	0.481916511	0.640841221	0.707239549	0.591348231	0.28754125	0.243960804	0.520378981	0.314203053	0.213940495	0.275290031	0.295017437	0.738271708	0.365702364	0.755930215	0.398191186	0.778849768	0.261448493	0.550548778	0.291885119	0.267645684	0.435809629
	1080	0.247081035	0.29760853	0.22881183	0.319057824	0.495702386	0.323764895	0.259101983	0.616322278	0.322126933	0.194897077	0.26272418	0.513844812	0.60517578	0.426475159	0.46890047	0.290889773	0.219298052	0.355907472	0.306545782	0.303494541	0.417307579	0.298806188	0.436775661	0.268483892	0.167102961	0.208660654	0.311160068	0.481402912	0.569045774	0.637674005	0.593835659	0.293533624	0.250164097	0.627142637	0.37523871	0.215213984	0.310638572	0.385550177	0.873721402	0.29108391	0.876936108	0.522242369	0.830719599	0.292688999	0.477405319	0.289296291	0.276124983	0.409543048
	1084	0.262502962	0.33669445	0.213120587	0.333619557	0.521562858	0.34787096	0.275132448	0.75426402	0.378495846	0.162312089	0.262313514	0.587076931	0.618330381	0.381601701	0.424977703	0.350593336	0.308611791	0.495372215	0.357915918	0.338488154	0.322138689	0.255656141	0.350901372	0.263725653	0.190568455	0.203652401	0.319222956	0.468240154	0.519792662	0.569488762	0.543558918	0.291513481	0.249063683	0.676701839	0.423038684	0.223010787	0.322466677	0.475177716	0.953943509	0.239196899	0.928500128	0.650676832	0.802612763	0.321571193	0.427919992	0.274799058	0.275575503	0.367265205
	1088	0.279998282	0.333405276	0.205347819	0.315002098	0.508224337	0.352433699	0.277252571	0.810071964	0.420301001	0.145596929	0.242309891	0.617498261	0.582798615	0.342137034	0.394123026	0.445792846	0.407202007	0.647950924	0.377969741	0.357434641	0.237414286	0.240172194	0.323096458	0.250550776	0.208999552	0.204589922	0.325202338	0.435490418	0.492096312	0.501047492	0.468433797	0.277450543	0.254189916	0.65086136	0.449035824	0.24761175	0.31751714	0.54018514	0.955095151	0.229279382	0.897516313	0.732940892	0.714239577	0.336409209	0.38928786	0.245245174	0.264387775	0.322003088
	1092	0.296226099	0.288337812	0.232009906	0.274361747	0.467533951	0.346022478	0.272349751	0.771356484	0.430708805	0.183431764	0.222656462	0.608886903	0.507293785	0.312948426	0.374737037	0.556496003	0.486244565	0.771990528	0.358514568	0.358091694	0.184806959	0.251126954	0.345225297	0.237908061	0.214526862	0.212781691	0.323085882	0.387242794	0.478893002	0.442048437	0.400673782	0.259836884	0.277990297	0.564473037	0.450269089	0.294223309	0.31594205	0.562970276	0.878245754	0.260983726	0.794994179	0.736144823	0.603473467	0.329491292	0.354198396	0.213366477	0.250191592	0.29248683
	1096	0.307105878	0.221221527	0.306178442	0.229623963	0.420133367	0.34101378	0.282451522	0.662432859	0.416703022	0.296965891	0.231314129	0.583454985	0.412694323	0.290928689	0.355259889	0.649056875	0.519605421	0.824643166	0.317160193	0.343496596	0.175604082	0.273529324	0.386009866	0.231261318	0.206133657	0.225198534	0.313765467	0.337317083	0.472304976	0.397937355	0.358412743	0.250944823	0.319993412	0.453965649	0.426087812	0.355355371	0.336759229	0.536194326	0.747268542	0.29914711	0.64913723	0.659525463	0.504462972	0.310180143	0.324673185	0.197439264	0.241011486	0.29599807
	1100	0.308883653	0.185609576	0.416318251	0.207978157	0.385490156	0.344748077	0.330318705	0.52748576	0.392421164	0.472891592	0.289182551	0.568320277	0.325102596	0.272995603	0.33381074	0.689585234	0.494965131	0.780399686	0.291309735	0.317933699	0.19903331	0.289039795	0.407195551	0.22856957	0.188934366	0.235493425	0.303508738	0.300665324	0.466908198	0.372909789	0.337677848	0.251319633	0.362471651	0.359922935	0.37599331	0.410111348	0.382633663	0.463603688	0.604670259	0.321370377	0.504615638	0.539270229	0.432038404	0.287720208	0.305117297	0.198168386	0.237619294	0.327069989
	1104	0.299827414	0.229322557	0.529098729	0.224648052	0.374414869	0.354953263	0.421332167	0.407674374	0.369139627	0.664078732	0.397673348	0.579100826	0.26797848	0.262188809	0.301080615	0.659108825	0.419155093	0.64440152	0.319598272	0.287540337	0.221966336	0.293499596	0.399977901	0.227864053	0.164828921	0.239250861	0.298204014	0.288331704	0.461060779	0.36618708	0.31859285	0.257289395	0.377730931	0.303777114	0.320065896	0.432160307	0.434294806	0.373155946	0.488990104	0.324003249	0.391319739	0.425044135	0.387334889	0.269581423	0.298544382	0.213917181	0.23172912	0.361497318
	1108	0.281508921	0.362102864	0.604933006	0.270405358	0.386378274	0.361983481	0.533943205	0.325236662	0.350588103	0.808889185	0.535362366	0.610011648	0.255352208	0.266384532	0.258159248	0.562444123	0.316113674	0.468529532	0.419621764	0.258978148	0.230882883	0.279968216	0.360479509	0.222087916	0.139175048	0.234677817	0.297865386	0.297924752	0.456281755	0.370789218	0.292211521	0.261829234	0.354874626	0.282458561	0.262214854	0.402960925	0.459206995	0.286907464	0.416392016	0.300404754	0.318822925	0.342584845	0.358056064	0.258931184	0.301851316	0.235545864	0.228559235	0.380766412
	1112	0.262289603	0.546747703	0.617290746	0.317841672	0.411365957	0.355828582	0.626284386	0.281227655	0.334395538	0.859306508	0.665300256	0.636329794	0.287414675	0.289595963	0.218990688	0.441570324	0.223146276	0.306261608	0.574016681	0.232885537	0.218332272	0.251913196	0.30464867	0.208381572	0.120601933	0.222604831	0.297927281	0.316194991	0.459236143	0.371268718	0.253112503	0.260752496	0.302326228	0.278757113	0.209601886	0.344269528	0.430035451	0.217381082	0.388358237	0.260556745	0.286185047	0.299895478	0.333357968	0.255538206	0.306577654	0.259854221	0.245978068	0.376791973
	1116	0.245990664	0.727018231	0.564764651	0.342348568	0.434581431	0.332945375	0.656522235	0.264242569	0.31733334	0.80264457	0.749248378	0.6281491	0.349612744	0.33535384	0.214792132	0.330943606	0.157376994	0.192512672	0.733610339	0.211635533	0.187583925	0.222502383	0.259692691	0.192122212	0.11379007	0.208638135	0.29637135	0.326699167	0.474447679	0.364198992	0.206917117	0.269740753	0.233890567	0.274863901	0.173278237	0.269873288	0.358780488	0.173521729	0.393454176	0.225318617	0.285375598	0.28906796	0.313334192	0.253216401	0.304436342	0.27715704	0.298327793	0.351994849
	1120	0.23489659	0.83145594	0.46959081	0.329697198	0.442148023	0.298509861	0.605544243	0.2616138	0.299585023	0.665227826	0.762105334	0.567911855	0.416293189	0.397198434	0.26221513	0.253479023	0.124812734	0.143570479	0.837709932	0.199690228	0.166745916	0.205687959	0.260973611	0.188393278	0.116942138	0.200157943	0.302417512	0.321268372	0.500122485	0.353360978	0.174790604	0.297351684	0.175089989	0.260619123	0.164257877	0.202831964	0.267359149	0.159713179	0.407421908	0.224051943	0.294504902	0.288913293	0.308900807	0.26177736	0.305691032	0.286240894	0.391258737	0.32253243
	1124	0.229008363	0.819635132	0.364620979	0.285315158	0.426309237	0.263069125	0.488481885	0.265412239	0.284592196	0.496886205	0.700348334	0.463965413	0.459011273	0.45680609	0.354585309	0.219096804	0.120039675	0.151996047	0.842131591	0.201773109	0.187790902	0.219677397	0.317977745	0.202957757	0.13471807	0.199413957	0.320939968	0.303163794	0.532279069	0.366823983	0.180654676	0.347211024	0.154749914	0.241588002	0.177909887	0.165165871	0.184280328	0.16284182	0.411774544	0.253097147	0.301578493	0.289999087	0.320097407	0.2838276	0.321513025	0.291859733	0.513900931	0.316310134
	1128	0.226798178	0.700882533	0.277254604	0.228719812	0.388801644	0.23633259	0.359746704	0.271488625	0.275012102	0.345960727	0.58168687	0.353034785	0.457521543	0.491822033	0.465052817	0.223419687	0.129979985	0.177423228	0.740671009	0.214689243	0.263718507	0.272351011	0.417680774	0.235575069	0.157816959	0.2062672	0.355184013	0.290985277	0.566233273	0.413597306	0.223289471	0.412360009	0.175445516	0.242719671	0.211676493	0.175550382	0.141313703	0.183415738	0.406292814	0.305554231	0.305769043	0.306448464	0.339821641	0.316793879	0.362811794	0.29951925	0.633004855	0.348295358
	1132	0.225422429	0.528324307	0.22193953	0.201400502	0.343027788	0.222446271	0.256643732	0.275779879	0.268873129	0.239969507	0.43756973	0.262075727	0.409149582	0.489308972	0.558548154	0.237511514	0.134458611	0.191464295	0.568521892	0.235367036	0.385956592	0.350407242	0.532995803	0.275793738	0.175182919	0.217337909	0.404386095	0.30938463	0.594093835	0.491665122	0.294672026	0.476534284	0.216637992	0.273914388	0.255489278	0.208351659	0.154456592	0.220329907	0.397458171	0.368349764	0.310117671	0.350576339	0.356785161	0.352337943	0.432437018	0.304123983	0.70551814	0.41312779
	1136	0.229539765	0.371292434	0.194146876	0.239643179	0.303292501	0.219620955	0.209539513	0.273650098	0.260281292	0.182870454	0.312597592	0.212815123	0.340132344	0.453790447	0.598151	0.25201411	0.133575924	0.191198367	0.391970335	0.257422745	0.526650893	0.431577296	0.635223722	0.307978737	0.180972801	0.229600668	0.464095849	0.376598654	0.610817524	0.587659614	0.383267183	0.508864636	0.260971702	0.328018325	0.297290306	0.251324548	0.196627676	0.267909499	0.402280374	0.43211249	0.315814379	0.422817739	0.364723868	0.380070407	0.521506864	0.307516416	0.708364027	0.487134299
	1140	0.243870658	0.281625174	0.184212848	0.350734362	0.287912746	0.223666357	0.21913612	0.264305643	0.245553339	0.157016483	0.223666689	0.218297452	0.273015054	0.406228821	0.564339995	0.263974602	0.132577208	0.186765578	0.260824928	0.275496937	0.641556477	0.494429947	0.694437392	0.317298899	0.178476399	0.243148469	0.520273042	0.493433764	0.618271407	0.683164373	0.473262531	0.498922899	0.293936646	0.384931947	0.329877489	0.291037476	0.241576883	0.316999428	0.425795903	0.487729939	0.324056784	0.508989304	0.368909711	0.385232537	0.602524111	0.307872079	0.646320697	0.54167219
	1144	0.269812555	0.272070602	0.184790165	0.51427249	0.305591925	0.232245566	0.260709354	0.256619456	0.230838954	0.143780712	0.180584401	0.263576061	0.238119481	0.373307944	0.482081587	0.273294319	0.137381156	0.193671563	0.202893518	0.285425154	0.689327835	0.513198858	0.689686262	0.3037573	0.172367432	0.260934284	0.567519707	0.639383018	0.620755903	0.743720724	0.55219374	0.45350478	0.307247266	0.424111367	0.344889425	0.319411104	0.273967749	0.355583326	0.462351988	0.539962437	0.335752304	0.579943867	0.390855512	0.370084293	0.652816022	0.303042617	0.549912443	0.553132361
	1148	0.303224747	0.317136651	0.193191524	0.694439321	0.352324677	0.246405728	0.290083925	0.269856192	0.234813464	0.136485145	0.181821301	0.308167907	0.249525147	0.372411184	0.394887263	0.280209575	0.151184667	0.222329484	0.209156415	0.291637931	0.661417674	0.483874266	0.636516171	0.283988862	0.176183006	0.28233783	0.605136176	0.778404729	0.622854803	0.763093336	0.617471981	0.393155856	0.304107634	0.426763522	0.349683688	0.327890365	0.286629644	0.368627657	0.499155675	0.596615025	0.351987075	0.614314575	0.455952374	0.347482068	0.660232112	0.293128777	0.458412185	0.518117517
	1152	0.333243817	0.373328822	0.205442089	0.837582119	0.41085759	0.268237425	0.297694757	0.3254848	0.282170342	0.139330247	0.214745394	0.332899155	0.296986641	0.400980441	0.341581799	0.284049708	0.173687832	0.272296925	0.244884051	0.303442818	0.578938017	0.425872626	0.561320817	0.282944747	0.19569201	0.305207117	0.635557543	0.872289846	0.627429629	0.749618767	0.672068931	0.340394296	0.295890523	0.402346354	0.355462862	0.320077018	0.284472778	0.357228342	0.524396833	0.657294215	0.372592541	0.611898131	0.574129382	0.334017311	0.629088721	0.280841307	0.398101858	0.452520313
	1156	0.348748668	0.40501822	0.217573673	0.901080491	0.465133547	0.296631731	0.283651389	0.43292122	0.389530549	0.153632786	0.250295136	0.331499357	0.341894307	0.437092539	0.3367912	0.281384321	0.202496831	0.332650855	0.266303259	0.329091982	0.480099903	0.364678452	0.488116238	0.319507666	0.224189277	0.321561981	0.660514486	0.89573593	0.634607763	0.718802279	0.717795425	0.307435919	0.291374551	0.378995656	0.369728842	0.303881621	0.28093413	0.334251467	0.528692333	0.708258821	0.402357078	0.595470519	0.727006766	0.340296023	0.577501459	0.270128404	0.369615798	0.383042099
	1160	0.345882305	0.400501925	0.225117427	0.868913522	0.500199122	0.324757719	0.262560805	0.577847404	0.551282982	0.17606864	0.279526889	0.304994648	0.359050703	0.451790651	0.365853325	0.27709308	0.23517316	0.389690099	0.261932884	0.370346485	0.400106203	0.319543743	0.42969221	0.39403005	0.246864255	0.321113081	0.677902443	0.846198994	0.642130473	0.68310391	0.751124657	0.291812915	0.290761629	0.387009704	0.392504503	0.286935139	0.285644651	0.320563093	0.52631144	0.727926247	0.448272527	0.598110236	0.871583502	0.364454722	0.52806471	0.264515459	0.352677652	0.334510805
	1164	0.332339642	0.370638209	0.221283508	0.755898957	0.515449575	0.341855576	0.249883275	0.722088961	0.734596942	0.19354877	0.292182935	0.270067135	0.342142167	0.42657214	0.396335441	0.281640277	0.271935285	0.437548577	0.238187966	0.420737043	0.354600686	0.296191392	0.386777816	0.485178201	0.252080247	0.298987613	0.681886952	0.743964019	0.646790752	0.645950489	0.764129885	0.282769743	0.288502918	0.440523164	0.418106572	0.275265991	0.297648447	0.336723844	0.54349884	0.700222751	0.516911833	0.642849839	0.960082695	0.393256285	0.497516412	0.266169474	0.325076309	0.319580951
	1168	0.325239736	0.334261571	0.201722038	0.599587311	0.523400145	0.338914062	0.249539084	0.817903208	0.888655998	0.192689024	0.283585853	0.249538658	0.294141111	0.3698554	0.398785213	0.308421928	0.314444878	0.482505586	0.215725493	0.468396889	0.335509607	0.28786984	0.354148164	0.558484482	0.242227074	0.262751101	0.666419401	0.622564974	0.646173719	0.603763322	0.749403763	0.273496345	0.28197414	0.528280481	0.440383431	0.274550906	0.308677505	0.393143824	0.603418959	0.627111995	0.60979478	0.726961449	0.964635976	0.410303186	0.490959131	0.275623822	0.282852997	0.335432405
	1172	0.342504908	0.302601932	0.174601418	0.444245251	0.542428869	0.314869702	0.254342332	0.830502876	0.965141242	0.16961422	0.25850868	0.254427505	0.243114583	0.304740529	0.364404315	0.366991388	0.362137647	0.537502682	0.212682918	0.501592617	0.320874371	0.283175474	0.328981803	0.582469432	0.236153731	0.233029379	0.629803154	0.514333585	0.639764628	0.55386919	0.70532359	0.269701089	0.278363102	0.61896011	0.457180193	0.291004728	0.313112083	0.483273796	0.709800323	0.531368988	0.718991607	0.820817411	0.891579869	0.406214079	0.502786836	0.291518671	0.247247854	0.368001695
	1176	0.391881377	0.274138704	0.16558074	0.324395865	0.585925236	0.279179551	0.253260428	0.756609378	0.939946031	0.142971813	0.22987553	0.278966817	0.231462885	0.267434804	0.309736356	0.455594488	0.409041427	0.610432944	0.229266816	0.513655067	0.292208208	0.275257366	0.31601442	0.543882061	0.259957517	0.235278899	0.577079094	0.43804889	0.628819067	0.501748977	0.638155063	0.287236103	0.293189989	0.677795742	0.470742602	0.329466009	0.316034376	0.583767302	0.839551778	0.446485756	0.826130539	0.882529373	0.776272309	0.384227715	0.522229192	0.310121638	0.252400287	0.400472058
	1180	0.46390823	0.244997496	0.192502366	0.25477759	0.653921923	0.248586141	0.23731538	0.62804771	0.82455171	0.146454566	0.214958027	0.306003005	0.288044267	0.28372425	0.266441725	0.558034323	0.444121995	0.694424526	0.246836822	0.504715197	0.248672089	0.266558676	0.32625664	0.454021352	0.330406105	0.285884153	0.518423386	0.39425243	0.615072262	0.46138378	0.559815102	0.339273148	0.340031161	0.684638517	0.484009906	0.389008277	0.332013564	0.662567682	0.950278458	0.398935895	0.90686924	0.879985449	0.661719588	0.357634081	0.539191731	0.325256664	0.320858146	0.421157747
	1184	0.533596784	0.215931029	0.259327028	0.229930395	0.731954865	0.239378106	0.219819699	0.497519042	0.660708585	0.210502342	0.229814603	0.319307069	0.400467315	0.354370611	0.262813868	0.648035094	0.455935157	0.767367987	0.249292402	0.479855874	0.209413951	0.266322414	0.369874963	0.346818494	0.440741871	0.380230797	0.464448339	0.369587069	0.599060838	0.447418891	0.482876129	0.421610489	0.417946381	0.643073107	0.495898048	0.459241955	0.374164967	0.691856868	1	0.393453195	0.939932445	0.807516569	0.574733649	0.340775242	0.547017679	0.32956363	0.442969534	0.427052967
	1188	0.570902832	0.206727558	0.353744334	0.231912179	0.797702739	0.259225681	0.227083251	0.413857456	0.501134567	0.340924967	0.283474323	0.315445189	0.544291113	0.44966648	0.307853152	0.699877068	0.439200107	0.801924095	0.228569799	0.445453617	0.202546443	0.282759938	0.447224256	0.257034026	0.558282259	0.490503214	0.42135778	0.35044094	0.579141333	0.464085605	0.415810918	0.507245268	0.505804291	0.575899529	0.499492195	0.521029041	0.440737126	0.659916567	0.968595975	0.410726932	0.916619548	0.687881216	0.514737834	0.339550721	0.54180498	0.317203934	0.574877553	0.422177521
	1192	0.554915842	0.247048495	0.448235715	0.241221777	0.831451209	0.303001634	0.281349868	0.400026783	0.386504657	0.513640302	0.373746632	0.308054871	0.678605878	0.533809622	0.386406645	0.699912311	0.399058097	0.780208614	0.206481234	0.406225375	0.247259387	0.315174596	0.54328677	0.203839413	0.636848088	0.576050166	0.388911803	0.330774226	0.551983594	0.498861427	0.360899718	0.556096599	0.568960958	0.510557616	0.485000664	0.552900279	0.509394468	0.576014368	0.868614093	0.419461549	0.845438235	0.559203793	0.463148071	0.347613974	0.520553812	0.296131028	0.658486709	0.412684617
	1196	0.484210976	0.357509408	0.507501032	0.245359877	0.824398012	0.354746809	0.386821365	0.445225389	0.330588597	0.679129738	0.486260252	0.321533789	0.761382261	0.57215264	0.467028924	0.652488446	0.349704436	0.704022442	0.223074472	0.364510839	0.33974684	0.351393066	0.629341388	0.190972016	0.638284603	0.601875918	0.362173239	0.308421006	0.525520691	0.52633197	0.315363538	0.535790245	0.575809317	0.463778759	0.445862951	0.540557811	0.545067461	0.465725315	0.738719368	0.395686306	0.74851296	0.455221055	0.413219188	0.350624497	0.480803544	0.271134722	0.652515113	0.402036117
	1200	0.389326883	0.528109774	0.512512794	0.241588865	0.780481664	0.394573305	0.529854422	0.514076068	0.320210732	0.785955158	0.597400856	0.377041568	0.772425616	0.550709029	0.517215421	0.57676111	0.307423126	0.594154449	0.313243414	0.321497293	0.451509111	0.372583684	0.672254261	0.204460756	0.551559142	0.555573694	0.341772859	0.288528512	0.499167502	0.521084785	0.275310866	0.462787065	0.514841697	0.434532067	0.384005366	0.484203752	0.518309188	0.359023714	0.62316072	0.346826938	0.650927916	0.390369382	0.357444534	0.339253504	0.42895122	0.249104225	0.555904692	0.388946977
	1204	0.299922474	0.719135872	0.469284804	0.233961334	0.711625787	0.40685988	0.672427613	0.566309945	0.328081228	0.804531684	0.680521992	0.478185514	0.71823239	0.480176527	0.517493289	0.496186042	0.281754369	0.479205701	0.476581173	0.281201733	0.54143132	0.362962025	0.647937068	0.220017064	0.41145805	0.453280998	0.324739902	0.278382497	0.47470811	0.487517578	0.24305017	0.362225089	0.408712228	0.408609533	0.313326899	0.399094146	0.430225748	0.277309407	0.549072598	0.288358665	0.568607219	0.357314828	0.309923689	0.316013226	0.376828463	0.236605823	0.421263561	0.37355406
	1208	0.237054475	0.867882185	0.40354544	0.228242445	0.630272856	0.385874491	0.773342727	0.575399223	0.329754308	0.739214867	0.713604667	0.604378114	0.62389548	0.394560242	0.467762962	0.426841518	0.270116782	0.380994702	0.679669734	0.249491832	0.575084157	0.332697577	0.564979058	0.225110802	0.269134386	0.34085111	0.311200091	0.278516209	0.456287597	0.43446571	0.216203406	0.269865025	0.299374813	0.373868669	0.25283639	0.314085112	0.317750042	0.230657628	0.514843532	0.245629448	0.501762901	0.34410094	0.298038954	0.286419495	0.330855533	0.236449462	0.299696663	0.356426095
	1212	0.210607061	0.918521456	0.344825511	0.227018285	0.544280864	0.339051213	0.805810559	0.536816938	0.314886025	0.622516525	0.68588623	0.716188431	0.518324274	0.32234938	0.394946159	0.371337403	0.259451737	0.305547383	0.853667664	0.227750408	0.540623441	0.289307352	0.456576557	0.21859277	0.160293607	0.25160398	0.303038626	0.283239711	0.448964295	0.381207432	0.195274215	0.22323163	0.216151555	0.333535436	0.212221308	0.25024018	0.212885586	0.210792056	0.496051926	0.237952615	0.444684643	0.334105254	0.332563738	0.261687602	0.299028113	0.237181461	0.23164913	0.33667753
	1216	0.216538223	0.848829535	0.309817376	0.228966832	0.457023192	0.287217312	0.766976199	0.463910024	0.28773425	0.495885904	0.601157034	0.770891886	0.421680064	0.277563111	0.323562942	0.330684587	0.237197788	0.256694924	0.929319424	0.216196686	0.45281187	0.248233941	0.34998964	0.205112631	0.106334622	0.203646898	0.301657444	0.289534799	0.448780831	0.349233281	0.187503993	0.239055435	0.176184991	0.292415138	0.194823659	0.214801497	0.149919658	0.203808159	0.47821947	0.261936908	0.394850544	0.32000285	0.385968572	0.251826913	0.287217816	0.233460285	0.225576571	0.31711097
	1220	0.229771762	0.681034095	0.294925895	0.230627003	0.383121796	0.241703638	0.675347462	0.384407384	0.261571412	0.3889788	0.476460417	0.741025979	0.34844665	0.261369427	0.269828346	0.297730189	0.205989598	0.221625276	0.870732436	0.213265931	0.348602639	0.225865643	0.278286076	0.194332194	0.107344914	0.195940152	0.300497097	0.295742369	0.459578874	0.35121469	0.200263121	0.279574207	0.177392387	0.262363424	0.196493427	0.204058748	0.146993091	0.198741887	0.44643695	0.284932814	0.344874352	0.304903056	0.430033081	0.256764191	0.289939418	0.223354802	0.255925479	0.303603879
	1224	0.236466536	0.482737824	0.28179371	0.229511937	0.323636106	0.211357847	0.55917902	0.318746772	0.244988628	0.309177772	0.355807654	0.626951735	0.298479107	0.265656146	0.242727576	0.266993292	0.167598964	0.191963811	0.694146231	0.213918503	0.263028501	0.232385184	0.271070315	0.1931112	0.130809788	0.212026911	0.29831321	0.303100867	0.482152892	0.367010172	0.234123612	0.311860961	0.195689264	0.25338431	0.205634653	0.207544542	0.184621699	0.192869208	0.405292742	0.293968076	0.299403831	0.296792498	0.438925107	0.265209204	0.297075965	0.21786995	0.276989396	0.302329485
	1228	0.235019042	0.316058948	0.263309216	0.225636192	0.283165613	0.201244426	0.443372732	0.272500631	0.238411285	0.25115476	0.258693618	0.481540861	0.265631938	0.273193211	0.243236586	0.241549463	0.132522278	0.169130156	0.480924225	0.212654531	0.210904848	0.249022773	0.319331036	0.198363265	0.146850787	0.221928065	0.297709099	0.314322901	0.515210187	0.381382989	0.292621513	0.3175671	0.204432153	0.263096125	0.21025107	0.209718574	0.216771362	0.186264249	0.379660088	0.278689499	0.274728908	0.29545505	0.406341584	0.271593985	0.307002106	0.23195204	0.269090547	0.315303844
	1232	0.229409948	0.21303884	0.233512758	0.221593985	0.271143322	0.20922839	0.350104912	0.245688671	0.2364758	0.207090901	0.196629496	0.34371117	0.246695214	0.277336035	0.254853664	0.230601507	0.113794206	0.163792933	0.296619476	0.210101587	0.191037788	0.265466228	0.386549867	0.205865518	0.14924526	0.218177342	0.303192533	0.329949754	0.556881649	0.386709734	0.3727637	0.296161017	0.200396535	0.273803087	0.20891284	0.206124355	0.229352577	0.185315172	0.392852892	0.248507629	0.282549081	0.302436557	0.359893781	0.27285122	0.321487801	0.276806897	0.239321464	0.342835278
	1236	0.22610643	0.179624295	0.197708738	0.219997921	0.289306818	0.221080777	0.285041172	0.237135326	0.23362085	0.167875307	0.171956604	0.244724635	0.241861678	0.279635681	0.267369277	0.234572377	0.116130639	0.172958205	0.191506566	0.20921527	0.19123429	0.274629773	0.444576767	0.210525817	0.141132471	0.206071555	0.318947717	0.347741358	0.602348435	0.388188316	0.460135508	0.269207947	0.191088183	0.275708897	0.203051346	0.201514255	0.217299136	0.191037797	0.433449635	0.236635305	0.313056173	0.317858683	0.345604817	0.270032439	0.346444643	0.352417449	0.224328053	0.379680335
	1240	0.228631332	0.195360306	0.16986925	0.221561191	0.3165832	0.230836213	0.243504767	0.240992041	0.226594891	0.13587207	0.178660358	0.202349475	0.244140779	0.281423978	0.275449525	0.248972091	0.12630843	0.194195977	0.180357324	0.212716015	0.196210375	0.270869551	0.46645066	0.20948474	0.132245921	0.198641133	0.345929226	0.363551798	0.647132095	0.401078101	0.535819336	0.27091903	0.189371639	0.264261617	0.19543794	0.201868536	0.18618858	0.198593934	0.482947118	0.274668695	0.351985733	0.344744668	0.397833448	0.266469491	0.388367217	0.445175765	0.2609482	0.417082145
	1244	0.234675659	0.217541597	0.164311544	0.22461917	0.340830882	0.23675289	0.221260154	0.252205309	0.219832827	0.122371059	0.186927583	0.217180406	0.249094453	0.281586959	0.2744397	0.263584743	0.136317581	0.216618444	0.234723535	0.220897516	0.202283251	0.253999248	0.439190986	0.203545129	0.133709155	0.205089453	0.380382583	0.375302985	0.686965718	0.443106325	0.582229872	0.324553912	0.201246623	0.251460177	0.192405469	0.207695101	0.161118627	0.202693283	0.517570538	0.363142864	0.378717295	0.389879882	0.513615721	0.266108896	0.448039389	0.525298964	0.354741153	0.44201496
	1248	0.239984036	0.224419883	0.174350233	0.226400968	0.350179546	0.235336585	0.216696745	0.26724113	0.220972045	0.131079317	0.191931618	0.246651791	0.253539826	0.277281425	0.262490983	0.271692688	0.13843094	0.229555187	0.284750831	0.23158317	0.2212655	0.235677898	0.379090539	0.196372536	0.146991295	0.223538044	0.412681236	0.387062935	0.716604931	0.520685882	0.589258888	0.425341892	0.22121813	0.258718401	0.199776523	0.215205714	0.167019041	0.204186271	0.520006073	0.483771613	0.378586502	0.457806045	0.648717775	0.268833219	0.518195984	0.56565737	0.483782058	0.446997903
	1252	0.241183447	0.220775475	0.191874104	0.225156934	0.341306542	0.225931028	0.220937408	0.278182737	0.232424631	0.151228683	0.194668235	0.272129557	0.255487761	0.267861027	0.24829717	0.266932511	0.132914607	0.229926218	0.300611503	0.241825124	0.263427008	0.234184859	0.319686556	0.194006691	0.166621477	0.242620455	0.433948888	0.409322859	0.72978041	0.619883336	0.557687778	0.541594679	0.236387104	0.304083435	0.221909967	0.218798893	0.203734931	0.212000367	0.496439057	0.597700224	0.353502071	0.544590323	0.739414493	0.271636694	0.583985692	0.555299764	0.603144781	0.433089615
	1256	0.237290483	0.214088902	0.208116158	0.221609176	0.318545709	0.213455013	0.228910378	0.27849592	0.250395907	0.171448613	0.198563917	0.286667631	0.257233151	0.262848321	0.250017892	0.250019631	0.130634033	0.228364457	0.281782313	0.249068103	0.328422927	0.258718052	0.304072295	0.19966672	0.184348582	0.250354764	0.441382883	0.453653002	0.720990469	0.710170663	0.497924225	0.630847634	0.236261196	0.391251225	0.260575739	0.21424955	0.255985613	0.240211779	0.476816006	0.660559217	0.329605964	0.634263745	0.737570051	0.271317699	0.628734062	0.504992581	0.66253819	0.40918778
	1260	0.231517256	0.211947009	0.218299717	0.218608708	0.293077533	0.207371534	0.237452143	0.267699162	0.26856802	0.180518605	0.206343639	0.290861133	0.264611071	0.275517369	0.285692225	0.238703206	0.145968513	0.246373097	0.24190209	0.253455117	0.399225658	0.310265573	0.358331923	0.211750633	0.192925682	0.243831245	0.440375772	0.523875357	0.68849492	0.759297593	0.424631154	0.662527294	0.219554899	0.505299305	0.313143407	0.204669957	0.305487923	0.298341669	0.495733531	0.649466403	0.343143294	0.700799026	0.637814493	0.267259114	0.641593835	0.440971015	0.640239962	0.387690212
	1264	0.229310608	0.215854098	0.222151426	0.219113478	0.28099979	0.211517615	0.241959989	0.258330477	0.28286707	0.175340612	0.216934061	0.287917014	0.282421597	0.315708803	0.363803846	0.25393034	0.187782614	0.302452129	0.209547684	0.257633322	0.448331178	0.378747124	0.474487541	0.224627615	0.189746131	0.224750349	0.441690409	0.609084823	0.636765816	0.750216324	0.350256584	0.632098466	0.198498811	0.610447794	0.367358678	0.202958939	0.335162186	0.380654131	0.568238709	0.572376885	0.417664808	0.717697124	0.500162125	0.263679145	0.622110731	0.390000698	0.553145495	0.378307144
	1268	0.232276475	0.219862354	0.221673781	0.223831751	0.289861947	0.225267401	0.23965249	0.271128761	0.294031089	0.159972955	0.224598251	0.283308774	0.309366975	0.382255244	0.47668256	0.302311623	0.252851091	0.39810828	0.206929772	0.263994936	0.450328599	0.444652746	0.61490731	0.231362305	0.177580819	0.20517043	0.45493878	0.683857994	0.576547721	0.689508355	0.288970617	0.559209406	0.194088188	0.667586669	0.405692701	0.221144837	0.341062856	0.463118921	0.676030619	0.460600468	0.545777013	0.670662278	0.373187999	0.265770667	0.578702961	0.364421402	0.444280182	0.382903186
	1272	0.237327891	0.216582726	0.218122304	0.23024153	0.309271959	0.24083167	0.23172205	0.322802416	0.309297619	0.144876165	0.22705178	0.278519685	0.336150547	0.459555483	0.595922461	0.380055342	0.323659862	0.512813516	0.234166951	0.271917976	0.400147193	0.483624471	0.733400508	0.23129551	0.164889046	0.200171647	0.482185154	0.717324967	0.521774014	0.602227428	0.243291691	0.472745439	0.220848952	0.653373892	0.410891715	0.263254692	0.334357604	0.511932666	0.773610256	0.359701337	0.686987242	0.568097869	0.299230591	0.274923791	0.522297427	0.356284829	0.356580523	0.394036924
	1276	0.239401086	0.206167318	0.214213922	0.233875907	0.325885533	0.250007221	0.222742093	0.413395887	0.336362842	0.140368819	0.219649055	0.272869987	0.349954758	0.517645144	0.681573386	0.470983582	0.374799258	0.611690816	0.266290868	0.277204034	0.324609887	0.480760023	0.786900207	0.222714296	0.153941778	0.213891843	0.51568293	0.687417693	0.484330383	0.516842982	0.209871496	0.394296349	0.275088805	0.570757254	0.373882898	0.323480637	0.33101434	0.500324643	0.811693158	0.291015786	0.784356451	0.45351266	0.291233623	0.286707172	0.459870964	0.344398263	0.309704347	0.398267059
	1280	0.234898536	0.195551932	0.205266456	0.231234168	0.330544906	0.248357822	0.219763116	0.52142797	0.376169948	0.148260772	0.202442504	0.262874379	0.343387798	0.529443593	0.702263133	0.548838132	0.387053432	0.661866858	0.281270708	0.274420086	0.244674875	0.436491611	0.758577917	0.208353958	0.144348374	0.232818052	0.54130787	0.592869441	0.469054892	0.453474935	0.18726415	0.34007702	0.336363446	0.455268525	0.314179429	0.385752832	0.339381978	0.424918042	0.764354712	0.256630002	0.791750237	0.353067706	0.325510037	0.294070854	0.404127825	0.31975038	0.293653357	0.389614553
	1284	0.225918181	0.193353731	0.187872819	0.222448297	0.322149653	0.233523622	0.226549218	0.610959429	0.419652845	0.16082781	0.1853208	0.249047591	0.3217886	0.484855604	0.649812618	0.593430107	0.357227984	0.648076244	0.271201957	0.26118596	0.184633218	0.368923403	0.663273789	0.194373355	0.135555944	0.244324801	0.54571761	0.473623468	0.471548756	0.417084767	0.177815079	0.302495251	0.379177203	0.34738038	0.247004736	0.430538158	0.354108476	0.324110528	0.652045065	0.245765239	0.697015164	0.288906671	0.347757264	0.294086744	0.354894392	0.27829406	0.290480793	0.368234096
	1288	0.222659247	0.206524777	0.173281433	0.211997086	0.304198606	0.212354182	0.24165351	0.647658598	0.45100302	0.172832531	0.185794306	0.2422751	0.302826575	0.408730952	0.543262555	0.598453836	0.299088008	0.578646186	0.242452136	0.243193454	0.161199133	0.303688969	0.537950957	0.187776633	0.130687162	0.24477262	0.522978884	0.361355911	0.480248055	0.396346627	0.177752779	0.272059307	0.384780809	0.27261055	0.19248797	0.4457171	0.36000159	0.228466913	0.524348846	0.24578941	0.552077284	0.274045443	0.346467729	0.284543881	0.311042676	0.229597193	0.278751825	0.337224978
	1292	0.234271943	0.225565025	0.181634234	0.210576602	0.28647855	0.202568724	0.261069972	0.615279689	0.455696465	0.188584685	0.210898063	0.256621969	0.30695197	0.328026927	0.421090259	0.571351083	0.234957455	0.479006219	0.214182838	0.225405657	0.171889807	0.256920366	0.424656679	0.189662558	0.132260846	0.231169105	0.476875127	0.28254259	0.488001414	0.379410461	0.188252237	0.247145686	0.352123311	0.244276592	0.173121836	0.430979767	0.342606933	0.173142802	0.421785926	0.241999044	0.404536656	0.299908365	0.326703907	0.26997487	0.282259418	0.203983873	0.251900833	0.306708566
	1296	0.261911032	0.236825796	0.225166496	0.223827585	0.278456384	0.21502239	0.282719167	0.523446236	0.428381535	0.220619364	0.26155814	0.297389092	0.343661294	0.268162149	0.323466809	0.526421281	0.184839963	0.377413492	0.207523349	0.213792625	0.194025484	0.238494937	0.349934932	0.202199639	0.144048478	0.210681799	0.418221354	0.251481786	0.487440242	0.363391436	0.209298575	0.24113949	0.297584771	0.255671888	0.194437664	0.395268476	0.299361976	0.173947196	0.371811636	0.242221444	0.296363039	0.328854498	0.312038295	0.259176969	0.286785381	0.229451054	0.223959567	0.289397516
	1300	0.296088008	0.23453514	0.306646497	0.249794064	0.287170837	0.246422756	0.307453634	0.411620012	0.3758671	0.283815349	0.328488843	0.358698648	0.402350867	0.244670488	0.267990612	0.47617081	0.15749588	0.294640241	0.229076621	0.211601145	0.215729575	0.244796204	0.316390252	0.220927377	0.162918324	0.195665202	0.367066671	0.26805707	0.47722194	0.357529468	0.22888084	0.260597594	0.247497401	0.277860764	0.227696193	0.349771386	0.247755384	0.215658525	0.381300614	0.25567908	0.251422171	0.347734352	0.324822608	0.258545583	0.324617753	0.297398249	0.224840506	0.298020341
	1304	0.320005418	0.229298774	0.411078238	0.280152303	0.303989409	0.286862268	0.340883984	0.314344415	0.315519124	0.38305337	0.393527148	0.422342417	0.454725853	0.256287442	0.253530314	0.426277279	0.147167159	0.240431352	0.263863885	0.216716094	0.227829378	0.259123872	0.311058602	0.238525644	0.179033786	0.194801678	0.329183676	0.294303417	0.462376005	0.369674839	0.235913495	0.307738465	0.214633189	0.288851766	0.251466437	0.302899336	0.20075785	0.248433215	0.416762451	0.278197481	0.274960681	0.350322364	0.362075331	0.264166188	0.390050465	0.384999125	0.260515027	0.329419768
	1308	0.317037592	0.242162964	0.503402201	0.30551556	0.322442834	0.322957455	0.389778357	0.25216459	0.265399946	0.504427779	0.437697447	0.461969724	0.468918775	0.276175315	0.262217577	0.376553444	0.142371102	0.206681324	0.291168005	0.22031049	0.228393421	0.267181279	0.316188476	0.248515485	0.183159345	0.202077952	0.30534845	0.311135594	0.451558762	0.401149904	0.22779515	0.369982947	0.200281341	0.287119665	0.256200178	0.264473686	0.170323424	0.25913968	0.439867613	0.296581673	0.317482629	0.33801923	0.401033948	0.271016609	0.464703887	0.46227043	0.323187304	0.376282323
	1312	0.291571995	0.302542085	0.548547612	0.317793312	0.339876078	0.34154601	0.455719877	0.234122497	0.233101957	0.616916138	0.454289215	0.458897869	0.431203019	0.286436425	0.272350636	0.328267173	0.134726171	0.184010097	0.29718406	0.218742815	0.221672953	0.264650692	0.317593367	0.246403508	0.171780032	0.211137441	0.293441387	0.312439057	0.450245285	0.439882228	0.211725625	0.428098894	0.196495913	0.274038397	0.236954681	0.232253445	0.162447024	0.238965406	0.442990933	0.298194636	0.354064804	0.318148541	0.418269667	0.273185964	0.519182963	0.495745002	0.393981497	0.42638725
	1316	0.251413199	0.422000479	0.530369031	0.320844437	0.35967959	0.342765652	0.530908416	0.252415537	0.221885739	0.685019996	0.452087915	0.412670755	0.362775339	0.283347669	0.270604058	0.285839945	0.123236432	0.168982123	0.282079249	0.211969692	0.210631709	0.251815262	0.312697214	0.234418601	0.147142892	0.216388002	0.291400777	0.303080989	0.462332516	0.468630867	0.201326594	0.46362362	0.193255173	0.261287338	0.202422613	0.205475566	0.173964394	0.196120654	0.435685549	0.27971053	0.377233992	0.30516444	0.404650869	0.268384943	0.528880337	0.471193838	0.453296477	0.468598678
	1320	0.219573957	0.580403879	0.460550664	0.327443525	0.384168873	0.339588005	0.598970543	0.282057549	0.228400423	0.685732404	0.449518885	0.344608702	0.286136009	0.271785655	0.263229871	0.252671229	0.119260173	0.162440635	0.262501759	0.204066845	0.202546443	0.236778412	0.310603196	0.222829204	0.127155837	0.217892926	0.293448425	0.290511468	0.486274469	0.473248568	0.21485779	0.472713738	0.183118647	0.26230987	0.177534999	0.187773341	0.188960728	0.156443378	0.430770371	0.247709392	0.392112746	0.310909251	0.383282429	0.262270232	0.494116682	0.407428186	0.486528604	0.487480666
	1324	0.219084506	0.729370068	0.372143955	0.350678035	0.417917062	0.348592954	0.640683931	0.310499212	0.245298392	0.620028234	0.462696466	0.281650153	0.233109728	0.265762923	0.261110349	0.240062861	0.133281537	0.171390112	0.260323631	0.201894485	0.20269014	0.230126339	0.317293959	0.222698523	0.131959028	0.221357463	0.304873198	0.289111514	0.516834587	0.45902253	0.257133914	0.474728218	0.182086033	0.280987612	0.190287261	0.189183093	0.204935071	0.161129108	0.444243889	0.240865158	0.401267543	0.339747077	0.399084475	0.264120086	0.442851222	0.341599989	0.501177872	0.484144226
	1328	0.256489979	0.813245045	0.301144118	0.393878596	0.458848025	0.377634393	0.641731658	0.335798496	0.266540149	0.512091185	0.494275825	0.242624475	0.227107137	0.276526474	0.272504432	0.252557155	0.165426013	0.197044522	0.28739682	0.213352086	0.213547536	0.240128395	0.329960928	0.239322565	0.166810448	0.23428539	0.324785684	0.30548437	0.548266874	0.45054236	0.314494535	0.495426221	0.201513928	0.309129284	0.23731444	0.208844202	0.222966474	0.211326421	0.476400718	0.285723859	0.413009425	0.385097823	0.4889687	0.279108808	0.41688115	0.308790567	0.515663545	0.467946975
	1332	0.310411475	0.796841094	0.267066657	0.445563563	0.496278723	0.418468984	0.598618385	0.354545162	0.291819572	0.396806411	0.529978703	0.237724648	0.260892668	0.303353638	0.29546691	0.283500047	0.204461943	0.230853374	0.336244737	0.233994476	0.236568862	0.264738109	0.340848558	0.268312012	0.217693399	0.259380511	0.347337767	0.336175437	0.573543184	0.476660746	0.361009305	0.547871363	0.241773485	0.33683087	0.297096581	0.242384666	0.244188783	0.283875715	0.510671582	0.385512966	0.427044129	0.438987298	0.6513242	0.303602425	0.447934336	0.323363117	0.543795538	0.450197193
	1336	0.360476679	0.684269047	0.26423591	0.483326582	0.51570888	0.449677924	0.520087277	0.365201465	0.316176228	0.302972857	0.545464779	0.25564575	0.294854189	0.332795757	0.3198949	0.31911937	0.234084067	0.259418259	0.382869885	0.253590905	0.2730919	0.292945232	0.344258209	0.296898515	0.263755411	0.290039855	0.364895219	0.371355175	0.591074411	0.549782041	0.373142596	0.620390402	0.289721461	0.354663231	0.344415315	0.277155154	0.267348152	0.345828798	0.525967508	0.512951636	0.435550172	0.489017598	0.836139601	0.326469609	0.537060389	0.372222262	0.582958179	0.438047385
	1340	0.384149675	0.5177594	0.268774995	0.485312702	0.507044205	0.448815504	0.423815042	0.366121446	0.333482537	0.241844288	0.520152129	0.273232371	0.310047933	0.351122538	0.336750124	0.34895744	0.236932963	0.272508499	0.400217208	0.262201325	0.323202288	0.31399676	0.341247242	0.310280907	0.279730266	0.312726429	0.370739927	0.402795826	0.604089252	0.652975475	0.344483781	0.680208138	0.325313532	0.362392249	0.358437583	0.299036347	0.289756437	0.371919366	0.513748615	0.627715462	0.432328131	0.525276468	0.965328152	0.333851974	0.650015083	0.423189614	0.613976364	0.431892814
	1344	0.371961948	0.356818961	0.259981565	0.443064206	0.471034908	0.406647837	0.334189352	0.35673366	0.337779786	0.206784135	0.450225289	0.275898776	0.29916536	0.349922495	0.345592906	0.359831791	0.211269737	0.260988503	0.374157728	0.255576002	0.383455441	0.324448812	0.344539775	0.299840345	0.254975239	0.315250919	0.365629219	0.426160204	0.617648798	0.744547	0.291398792	0.691436411	0.325643244	0.37188608	0.333900871	0.295848908	0.307688595	0.346571014	0.487558465	0.677342596	0.422381217	0.543658016	0.973746021	0.319706179	0.732755778	0.443312276	0.61264128	0.427293909
	1348	0.334543746	0.24943246	0.233326985	0.368153175	0.419705135	0.336037986	0.267225908	0.340135478	0.326782359	0.185392315	0.353118427	0.266075405	0.263842332	0.334811278	0.357324188	0.348950666	0.171597777	0.234082706	0.317785556	0.235571814	0.445670535	0.324734935	0.373371558	0.268638242	0.203434368	0.294364046	0.361014607	0.443682475	0.635102739	0.779106526	0.24539695	0.636683993	0.289239313	0.40075533	0.29600399	0.268363836	0.319706594	0.294180025	0.477572837	0.643824882	0.423672701	0.546862796	0.847235891	0.292324614	0.739505589	0.416829813	0.56527371	0.419688279
	1352	0.295285411	0.211329293	0.195613882	0.288205893	0.370331546	0.264151655	0.229821184	0.323680075	0.304504232	0.167456721	0.261403252	0.248387118	0.224462984	0.327036518	0.386882219	0.322325439	0.140367039	0.208230222	0.254057558	0.21741193	0.498433753	0.327271623	0.440337572	0.230792989	0.154150035	0.259145983	0.370582348	0.458703326	0.655859526	0.733432875	0.235880007	0.528885253	0.23617592	0.46064677	0.280687468	0.232916065	0.32868406	0.262584049	0.512598289	0.545377702	0.458131017	0.54250482	0.64048783	0.270739049	0.65805741	0.353317603	0.47841937	0.408581033
	1356	0.275847281	0.224061786	0.171311997	0.233929872	0.336607067	0.219023946	0.222745963	0.315671933	0.280452116	0.14915687	0.204485524	0.241729208	0.217019201	0.347466038	0.440963002	0.291234517	0.135104576	0.198344526	0.210221134	0.21603738	0.530979984	0.346004789	0.540416376	0.204636637	0.137726679	0.226564865	0.400909195	0.470797791	0.675443737	0.62156338	0.272990167	0.405839918	0.197825659	0.546692412	0.312368588	0.209504	0.340024972	0.292659384	0.600430202	0.426301483	0.536634157	0.538806988	0.437404628	0.273235134	0.521304031	0.282318051	0.376924866	0.398402346
	1360	0.283515099	0.251232577	0.179690331	0.224036073	0.322333011	0.215767519	0.239122535	0.319785787	0.265109767	0.137114822	0.19658474	0.255414393	0.259343242	0.402226725	0.509363532	0.267501623	0.158863025	0.21172909	0.204759138	0.236620336	0.537283769	0.384104616	0.648601561	0.203158538	0.167273125	0.211818816	0.445301552	0.474685129	0.687522087	0.492830598	0.340669162	0.31057308	0.199138406	0.634850857	0.387544506	0.210607999	0.356727593	0.393284378	0.719037654	0.333158102	0.647533467	0.539682045	0.317634506	0.304979791	0.38385934	0.238025038	0.292083484	0.395446695
	1364	0.307977731	0.26181476	0.217001223	0.256307745	0.321245917	0.247401747	0.263553201	0.331393952	0.264238404	0.139523986	0.229092216	0.284180087	0.332662582	0.476350675	0.56684972	0.260071951	0.199748545	0.247799968	0.235975106	0.270731893	0.517898025	0.430052347	0.728833895	0.227002998	0.230395656	0.219629386	0.485402846	0.464012704	0.686620756	0.397709945	0.404329952	0.269579136	0.243988043	0.69017031	0.474553784	0.235016378	0.374951182	0.533336181	0.824692923	0.29134795	0.756954162	0.541806381	0.315050917	0.352970929	0.293327297	0.242334204	0.247247854	0.402878917
	1368	0.329007297	0.249107959	0.259704385	0.309633034	0.3226064	0.288022832	0.284943673	0.339334141	0.275697734	0.15462546	0.276016545	0.312064824	0.407552333	0.539983933	0.585745616	0.273758229	0.239412793	0.302229801	0.279418116	0.300933832	0.478580628	0.462877568	0.750295609	0.264041623	0.294931114	0.242054286	0.500519821	0.437228288	0.670108054	0.369865966	0.429044368	0.28116502	0.312569523	0.683030187	0.530180999	0.27022345	0.384083205	0.655717823	0.872963518	0.295480765	0.822318212	0.535760616	0.401229479	0.392237937	0.285851874	0.294633406	0.248862571	0.417133122
	1372	0.329703394	0.223197953	0.287070764	0.355613982	0.318597226	0.310519161	0.296954127	0.332928018	0.291025807	0.173121877	0.307310724	0.326491862	0.455186989	0.563959282	0.552087815	0.309282947	0.264689022	0.371025207	0.313625388	0.311282117	0.426939743	0.463878535	0.702530292	0.295890645	0.330017339	0.264066475	0.479555513	0.400896263	0.638666115	0.40581298	0.397971181	0.320400441	0.3724878	0.605384829	0.523599433	0.301360235	0.372406522	0.705976341	0.840828001	0.318030024	0.81248913	0.511286157	0.499917897	0.400048521	0.348854871	0.372629846	0.286569716	0.428312109
	1376	0.306755799	0.20589371	0.282675551	0.373074881	0.308705555	0.301231703	0.2963597	0.309895043	0.300822917	0.186138538	0.307140038	0.318656793	0.452594357	0.535681416	0.475186799	0.363219823	0.274739461	0.450670991	0.325454696	0.297332715	0.369574767	0.427950253	0.601140829	0.307772328	0.320441283	0.27307198	0.428312649	0.367400313	0.595463527	0.469204573	0.331005772	0.356032979	0.396814715	0.481948527	0.453661132	0.32046909	0.335258151	0.659921849	0.737687242	0.329445791	0.723654967	0.464136753	0.545959217	0.371367017	0.435307849	0.442873207	0.34031451	0.424824696
	1380	0.272074371	0.211061767	0.250339648	0.357503837	0.298562661	0.269633831	0.286253334	0.279472521	0.300324165	0.187452313	0.278591646	0.295663612	0.400352151	0.46600501	0.384037345	0.427405334	0.279296084	0.534280829	0.314691844	0.269308755	0.311549499	0.367575157	0.4808993	0.296174991	0.275158019	0.26613819	0.367361426	0.347969465	0.549599095	0.509703514	0.255638836	0.368253068	0.378310707	0.357018461	0.349525272	0.330008592	0.280161092	0.535393664	0.604114282	0.316399062	0.582185741	0.40482155	0.511910033	0.323800545	0.497611608	0.475380998	0.389129175	0.402671907
	1384	0.242848878	0.235271889	0.211594219	0.320787577	0.294544894	0.232066817	0.273871511	0.257523979	0.291388476	0.179340029	0.241209152	0.272895648	0.329419566	0.383216578	0.312114013	0.488869304	0.289630859	0.607697648	0.294396315	0.246207328	0.260042067	0.306796487	0.379988282	0.270034326	0.220380289	0.250509709	0.321323042	0.345554636	0.509182703	0.50212253	0.198166055	0.356407481	0.331691118	0.271329201	0.254569944	0.338661834	0.224805688	0.382325969	0.48696189	0.287085235	0.441671095	0.348362372	0.42796108	0.276996258	0.513039837	0.455655978	0.417137845	0.369907931
	1388	0.231627005	0.258577559	0.191114593	0.282374195	0.298206795	0.211091908	0.266555815	0.256515314	0.279686192	0.171927588	0.218826799	0.262443264	0.274568897	0.317896627	0.279493932	0.531892614	0.308735638	0.650445792	0.281295044	0.244260342	0.219763895	0.26853504	0.323739487	0.244917354	0.183298791	0.237633165	0.305780614	0.352638565	0.476345578	0.457129157	0.177079794	0.333967818	0.283366201	0.253290202	0.203302912	0.352901733	0.188290737	0.257207176	0.412902433	0.261691832	0.336600053	0.308983444	0.343134716	0.254184994	0.473243065	0.39459249	0.41580199	0.334093239
	1392	0.23835287	0.265378149	0.200532448	0.257689384	0.304608072	0.217483979	0.267728488	0.276379074	0.26935366	0.175875329	0.22595222	0.265074768	0.255352208	0.287581796	0.283098094	0.542716257	0.327614974	0.643296242	0.28538548	0.266754419	0.198426402	0.262667697	0.31601442	0.233722175	0.176740131	0.235147617	0.319621531	0.356002377	0.454187139	0.395603329	0.190699294	0.315608281	0.255585523	0.300476046	0.204649588	0.370626626	0.180692584	0.196093788	0.39155881	0.255963268	0.29082735	0.298097279	0.310779323	0.262918876	0.404408234	0.320707367	0.384343032	0.30782192
	1396	0.251709093	0.253575571	0.231273434	0.250556282	0.30957974	0.244434212	0.274989972	0.30297739	0.261713797	0.194545758	0.260236804	0.270974867	0.267819642	0.289750067	0.30082138	0.515319628	0.330359228	0.579009961	0.304871303	0.301459107	0.201105696	0.281791538	0.34162755	0.239333059	0.193782916	0.242284711	0.347316186	0.345748652	0.450650232	0.356036317	0.210549486	0.30654444	0.25471122	0.378006752	0.24054786	0.381570396	0.197513169	0.200225078	0.410372801	0.269794071	0.301560017	0.31432861	0.349224599	0.290129328	0.341139518	0.254787034	0.334244516	0.303959804
	1400	0.257901906	0.229724412	0.260821594	0.253289723	0.307821206	0.268441367	0.281435483	0.315855135	0.255640775	0.221021931	0.304640237	0.268933124	0.290932039	0.306255472	0.309769628	0.455140844	0.304650573	0.469378393	0.32864851	0.327266223	0.225800597	0.30684597	0.376963251	0.253388555	0.214543279	0.251373723	0.369472409	0.32270795	0.468085777	0.364215128	0.219684602	0.30130143	0.270001218	0.441480819	0.279276423	0.37427687	0.222646393	0.240533728	0.441504265	0.288549877	0.344974811	0.339815151	0.433421668	0.310039654	0.307392687	0.217029217	0.278595047	0.322857051
	1404	0.253265132	0.207679376	0.267806549	0.25493106	0.299011713	0.274955888	0.279494321	0.310059761	0.246281859	0.241954603	0.337255172	0.257471781	0.302458513	0.31552043	0.301036795	0.378600602	0.253878318	0.347877881	0.343799721	0.326032652	0.259449312	0.318765532	0.4019385	0.2616529	0.219660451	0.253769463	0.374886526	0.299025183	0.506508238	0.417782046	0.215136355	0.291749789	0.282345442	0.463384512	0.294421013	0.344671844	0.238022727	0.276771137	0.461873895	0.295517066	0.381417935	0.356686724	0.505811143	0.313028189	0.306954078	0.218672382	0.240327002	0.351056144
	1408	0.239585296	0.200605521	0.249502649	0.250948491	0.288432924	0.263176477	0.269559232	0.285247282	0.232475882	0.245602547	0.342753566	0.249538658	0.293760058	0.311881196	0.276763675	0.311191774	0.197105721	0.248978716	0.342933943	0.300051912	0.287073998	0.308885414	0.406880165	0.256110517	0.204024806	0.245665375	0.366517716	0.290985277	0.565898922	0.484551927	0.201823242	0.277434126	0.276497686	0.435720242	0.278298914	0.300019816	0.233737546	0.281463205	0.467532101	0.285996902	0.396132515	0.356258867	0.530662664	0.298895586	0.327174094	0.250892838	0.242572817	0.377966045
	1412	0.227268996	0.209303621	0.217158662	0.2397714	0.284723087	0.237435777	0.25420883	0.253012359	0.21908884	0.228762068	0.319176936	0.266354548	0.274332632	0.295163172	0.252231603	0.265005994	0.149760707	0.190408313	0.327076237	0.260621584	0.292814857	0.286572784	0.392039063	0.238270772	0.177595263	0.232812639	0.357842992	0.308280314	0.638750065	0.543977858	0.195701999	0.269701089	0.255257805	0.376099756	0.246826589	0.255253863	0.216327651	0.2579015	0.459035915	0.272458651	0.383250154	0.34111398	0.497258553	0.275818947	0.3513523	0.293128355	0.297636883	0.392945463
	1416	0.226763007	0.221180675	0.187704025	0.226001515	0.289142881	0.211989259	0.238055959	0.235696369	0.215878491	0.198641449	0.277074425	0.323340947	0.263989784	0.274457107	0.246242521	0.244090586	0.124222477	0.173878632	0.303188819	0.222418845	0.276351295	0.262487847	0.370015448	0.213617011	0.151843574	0.220786581	0.362292166	0.346522724	0.707999082	0.577395773	0.211382201	0.285794727	0.22713951	0.316281559	0.216476998	0.224807899	0.196082665	0.218490355	0.442716972	0.276506924	0.355191411	0.318412833	0.431857746	0.259626128	0.370657518	0.336859991	0.394097394	0.389614653
	1420	0.239151514	0.226548958	0.176726406	0.2166247	0.298935063	0.204339357	0.226742069	0.248212309	0.226437512	0.169191757	0.236187358	0.416897977	0.278419713	0.26184178	0.260567791	0.243514047	0.122885838	0.185101949	0.278846394	0.199494976	0.245774715	0.24700466	0.346860742	0.193102558	0.136556042	0.214147674	0.382882793	0.388033704	0.755946473	0.583435716	0.250495758	0.336506024	0.202833479	0.278385243	0.200329092	0.213231215	0.18314852	0.184370444	0.427555476	0.312774647	0.324006236	0.302426473	0.380318109	0.260783779	0.388059204	0.375082473	0.506952769	0.372551145
	1424	0.253811444	0.221119025	0.184911712	0.214955613	0.307079895	0.22112386	0.224079903	0.279423897	0.248536977	0.149249698	0.207303193	0.521099543	0.317631706	0.265347162	0.278540196	0.252483786	0.134342807	0.197811157	0.257900821	0.199661161	0.212657559	0.24379556	0.324090707	0.189071035	0.134117584	0.213379877	0.408943323	0.410808625	0.770146491	0.57429906	0.302790214	0.415884845	0.190395345	0.268237922	0.200786948	0.215447772	0.18137308	0.174967504	0.416546413	0.375774266	0.301604857	0.303624156	0.380861241	0.274271335	0.412795247	0.406077327	0.597155258	0.35442861
	1428	0.261225217	0.207726326	0.198716379	0.21700303	0.31110089	0.249088142	0.226154068	0.314091612	0.272427344	0.142102871	0.194547648	0.597639576	0.364445288	0.276219219	0.289057406	0.256214011	0.140634877	0.195130407	0.24283474	0.211619533	0.190243492	0.248829332	0.302762003	0.201712021	0.13742954	0.215411273	0.422126936	0.400356651	0.747636466	0.563283963	0.353225759	0.500520111	0.191445217	0.275234703	0.21009979	0.220596236	0.186576145	0.190815423	0.410283179	0.439143718	0.295000348	0.320898236	0.443432677	0.286810386	0.450188717	0.434675989	0.631614242	0.348793104
	1432	0.258903081	0.199008844	0.204804837	0.22065573	0.307944656	0.276438299	0.229812807	0.336430124	0.286795686	0.144763734	0.195160353	0.614119812	0.393568356	0.287273854	0.284361655	0.25473891	0.137608061	0.18027563	0.232179299	0.223453104	0.186481192	0.250954029	0.295523922	0.220955044	0.136798671	0.214016473	0.407851434	0.368451493	0.695482152	0.553928359	0.387716343	0.559679688	0.196036122	0.281507901	0.213166781	0.219643908	0.186923011	0.20963662	0.408621811	0.468644205	0.302493688	0.339822443	0.546361521	0.291203761	0.494220565	0.46522778	0.599456431	0.362239426
	1436	0.247788011	0.203494588	0.198755952	0.224247766	0.299286352	0.291104004	0.2336111	0.33415851	0.282438561	0.150622792	0.202662415	0.560304114	0.385354195	0.293825607	0.263820836	0.251923373	0.129148137	0.168413677	0.223967094	0.229704977	0.193742457	0.250625771	0.311513672	0.236912007	0.134073822	0.209803753	0.375461981	0.327634088	0.627330644	0.537990254	0.401802099	0.570447478	0.198798295	0.27321565	0.207848887	0.210674365	0.178766092	0.22304679	0.411340803	0.443864084	0.313537738	0.349581001	0.649788986	0.283293426	0.527927337	0.494539246	0.51711102	0.390083612
	1440	0.234990649	0.219061773	0.184331876	0.227491067	0.291084411	0.285528919	0.237014596	0.311140137	0.263271821	0.152884655	0.207275837	0.460018354	0.351885061	0.294798508	0.247614744	0.252168527	0.126331922	0.174619524	0.21833872	0.230054264	0.201230252	0.253832364	0.362827859	0.243004027	0.135956895	0.206413656	0.33433582	0.294060807	0.561625122	0.505382582	0.400144174	0.528739259	0.199165932	0.256629819	0.198413172	0.200415954	0.167924211	0.225332759	0.414636014	0.385850483	0.323004597	0.349462577	0.716059118	0.268032095	0.531370875	0.509692761	0.419006188	0.417849476
	1444	0.229147141	0.234354192	0.175125931	0.230795727	0.289480322	0.267643094	0.240008192	0.282762279	0.240406583	0.151777252	0.208197079	0.356237871	0.30383638	0.289302751	0.258788259	0.256789828	0.136968142	0.201329801	0.216918147	0.226366094	0.204927673	0.266936485	0.451618983	0.238336059	0.14737967	0.207594932	0.300447165	0.279481624	0.512548907	0.463080705	0.38997949	0.44982147	0.198770265	0.252392078	0.191832484	0.196572255	0.167657691	0.214034148	0.415972345	0.313687538	0.325508629	0.338636476	0.725188089	0.257204322	0.492213489	0.493117026	0.338766043	0.42791799
	1448	0.234239873	0.243870877	0.179119864	0.233844107	0.292601911	0.243794533	0.242083851	0.262698159	0.228034825	0.149299289	0.206213635	0.276925503	0.258434542	0.279679105	0.302689409	0.262692423	0.159457767	0.236112427	0.217684384	0.223716131	0.208202361	0.289537944	0.56295956	0.224251188	0.166153792	0.213808427	0.287316416	0.285538243	0.482227536	0.414126698	0.373793211	0.369793241	0.199166055	0.276556063	0.19246238	0.202244675	0.186685943	0.196355716	0.411746697	0.254649098	0.317282392	0.32253958	0.678697953	0.257365417	0.433058148	0.437941382	0.291788136	0.414406245
	1452	0.242891194	0.239288737	0.192750864	0.234923465	0.297614892	0.221920158	0.24174405	0.257682814	0.232574751	0.14712866	0.202464242	0.237353026	0.231399718	0.269848084	0.367200488	0.264415616	0.182863915	0.25931304	0.218537688	0.224603286	0.220955581	0.310228522	0.659224446	0.207086777	0.182637194	0.22112281	0.298330579	0.293477422	0.467589276	0.370356323	0.346713557	0.308375893	0.200005393	0.328709787	0.199018724	0.213557455	0.222495009	0.184056839	0.400156681	0.229474926	0.298514297	0.309004459	0.593068434	0.266310072	0.366527281	0.363811598	0.277426303	0.38428589
	1456	0.247524964	0.220719026	0.20825241	0.231867523	0.30050447	0.20839249	0.237292087	0.263949791	0.248310821	0.145331563	0.19772835	0.235130804	0.231283024	0.263107351	0.42843332	0.258237494	0.192423023	0.25817782	0.21745411	0.22742082	0.252962234	0.322550334	0.699625135	0.194795753	0.187125069	0.223574728	0.314530575	0.294937712	0.463376248	0.345838626	0.311581744	0.273158891	0.199306914	0.389644973	0.205889626	0.222231489	0.261411969	0.179830886	0.392155212	0.239609881	0.283826338	0.303672215	0.495538322	0.276891714	0.309619925	0.28388415	0.276872861	0.345633055
	1460	0.243305831	0.198816516	0.213148526	0.224031951	0.298977626	0.205102825	0.228549283	0.269600916	0.260078881	0.142818845	0.192604368	0.248281796	0.24186356	0.264403748	0.454568327	0.245459992	0.186422577	0.233984975	0.213277948	0.228209265	0.305649638	0.317291886	0.658554946	0.190617386	0.176923543	0.217538676	0.325328297	0.287644716	0.461478446	0.348704282	0.270684433	0.260643454	0.195569496	0.42807098	0.207586102	0.22137717	0.283959697	0.182927624	0.404115823	0.253278907	0.295165844	0.299959309	0.41203858	0.280628812	0.277001603	0.219888552	0.270460826	0.31180664
	1464	0.23107262	0.188305501	0.199549012	0.213679537	0.294028243	0.207477197	0.218122465	0.26490772	0.26301509	0.138970038	0.188058848	0.252026604	0.257505818	0.279131793	0.429507402	0.23238417	0.165210143	0.197735379	0.20711447	0.224407809	0.365746702	0.289868309	0.558862655	0.190931854	0.154290666	0.204938297	0.323231976	0.275986279	0.456514285	0.368844273	0.226718837	0.262204954	0.189809089	0.421674198	0.202913706	0.210465507	0.276086282	0.189695069	0.450440631	0.258112581	0.35069991	0.296592185	0.350190741	0.273785718	0.275657334	0.194382982	0.250981404	0.295415432
	1468	0.217001462	0.190258214	0.173026552	0.205373187	0.289064454	0.216367004	0.210840964	0.251472563	0.252586146	0.1348735	0.186618319	0.244990994	0.273369145	0.308231352	0.374821991	0.226669916	0.13863657	0.170120081	0.202818984	0.215986436	0.407947391	0.249321146	0.435421596	0.195365424	0.130748978	0.195090972	0.307996907	0.267924703	0.450829328	0.398829555	0.189623398	0.260411664	0.188093588	0.378106317	0.197596398	0.196559014	0.246364745	0.195267074	0.534412554	0.249336127	0.454709379	0.296316335	0.313084185	0.260075696	0.283156938	0.214235868	0.227870744	0.29633327
	1472	0.208608372	0.205230189	0.161118339	0.203402958	0.287276528	0.230086531	0.217118612	0.238666575	0.233676386	0.136363305	0.191269952	0.234532803	0.286442419	0.345597566	0.308768233	0.23811191	0.120344941	0.168503286	0.206353418	0.206608231	0.406606225	0.216184402	0.32390369	0.202100786	0.122875673	0.199261768	0.286586505	0.275680886	0.446960182	0.430306331	0.172047588	0.256624825	0.195119019	0.311055655	0.199406012	0.193316019	0.205758602	0.196514859	0.642782947	0.232793325	0.591864302	0.303734539	0.301479587	0.2517882	0.295688432	0.249942651	0.212520183	0.304317285
	1476	0.214382709	0.222742865	0.186535876	0.211049855	0.289203137	0.244278604	0.238054608	0.239596259	0.217356414	0.146616087	0.202614224	0.233844322	0.294099689	0.377411045	0.254497986	0.263706619	0.119479707	0.187449481	0.219214902	0.200597337	0.362314711	0.199371737	0.257639378	0.209027584	0.134213065	0.220969881	0.269209772	0.30012226	0.446367928	0.458365643	0.171304586	0.255919605	0.210611889	0.248305196	0.211645532	0.208175444	0.17129517	0.19512654	0.740554472	0.220650411	0.721452868	0.321350103	0.309322384	0.259700042	0.310248682	0.281002741	0.223670698	0.313421249
	1480	0.234213315	0.232380279	0.260217036	0.22827466	0.292329485	0.253643669	0.266778337	0.258887906	0.215830153	0.164617202	0.218802756	0.249538273	0.29344863	0.385719983	0.229608426	0.291555782	0.125993091	0.206883825	0.238554251	0.20007181	0.291393284	0.208936646	0.254464635	0.214466903	0.152468472	0.253879456	0.270906109	0.332013255	0.462122545	0.479528544	0.180463783	0.263590522	0.22897108	0.217153357	0.23067769	0.238142738	0.158756938	0.196600495	0.789633741	0.236436646	0.795854269	0.346730013	0.323593347	0.285388833	0.321898398	0.290336426	0.258497941	0.319576101
	1484	0.261105745	0.23159827	0.374063941	0.248034942	0.293158972	0.253103729	0.29273145	0.290553266	0.225985905	0.18581262	0.237120211	0.278431984	0.28458681	0.366669878	0.239795078	0.310332411	0.132791298	0.213105525	0.259583019	0.20397618	0.215729892	0.249516342	0.299803843	0.217317541	0.164202651	0.286242557	0.305511224	0.360476702	0.494472047	0.489041473	0.193558497	0.276684033	0.243015149	0.233460224	0.248647241	0.272623816	0.170641772	0.207612275	0.766718908	0.280553023	0.783797777	0.372614709	0.340260006	0.321315213	0.328034923	0.274183764	0.301171193	0.325384809
	1488	0.288445613	0.227580814	0.504203594	0.26536274	0.292155081	0.244104131	0.308235776	0.322939147	0.24300813	0.204924163	0.255186879	0.311201939	0.270969662	0.328045805	0.262041917	0.316518645	0.13541741	0.203528862	0.278551752	0.209365281	0.168965656	0.305203495	0.358653616	0.216452325	0.164710524	0.306669849	0.366893987	0.380283937	0.541711321	0.486647071	0.203557462	0.288577054	0.246896233	0.276655187	0.257537416	0.300598617	0.190674132	0.232644569	0.675915296	0.338322411	0.686379183	0.388369567	0.355545855	0.35692662	0.328996592	0.23778684	0.335088398	0.33671529
	1492	0.314560744	0.229552015	0.612890091	0.280817811	0.294144347	0.234744187	0.307869308	0.34572409	0.260701739	0.215929907	0.272636885	0.338925674	0.257188152	0.282851775	0.289522336	0.310664323	0.1363529	0.187335977	0.293781048	0.214489855	0.176600245	0.357363205	0.405242827	0.21259486	0.150928655	0.311470493	0.441327591	0.388672018	0.60003038	0.47150699	0.206682834	0.296279438	0.243138734	0.329733764	0.255496097	0.314509518	0.211519109	0.271100025	0.559647295	0.390875046	0.540121886	0.388068981	0.369170154	0.382493267	0.327157703	0.204736342	0.355138268	0.36197839
	1496	0.33811475	0.249019041	0.672274254	0.297477952	0.305793048	0.2352257	0.30046462	0.354033044	0.276636403	0.219092228	0.291956478	0.356061209	0.251435	0.255106693	0.317789437	0.304625998	0.143520674	0.184131775	0.308938251	0.221588276	0.226037327	0.394459801	0.423929987	0.207190337	0.134184308	0.308752275	0.513085815	0.393416122	0.662944433	0.444352309	0.205958457	0.304938512	0.24091097	0.377092716	0.248364244	0.318253274	0.23018257	0.314784684	0.454944817	0.426961785	0.402093752	0.375838993	0.383380021	0.396656344	0.327168688	0.22117191	0.364396846	0.406336961
	1500	0.360820978	0.287805893	0.673251208	0.317355679	0.330746734	0.250715196	0.300705336	0.353630162	0.290992181	0.21898432	0.315225785	0.366018674	0.259609157	0.262568059	0.343879373	0.310471284	0.163409538	0.207385952	0.328099758	0.230518153	0.286539435	0.410090085	0.413884048	0.202741815	0.131630358	0.311144097	0.562514637	0.404173105	0.70842755	0.411001301	0.207431599	0.323739488	0.248600969	0.412252716	0.244276157	0.322255755	0.246162645	0.350082933	0.394285943	0.436079406	0.31492514	0.364131002	0.403077841	0.405916674	0.338314308	0.294898579	0.385707937	0.465231945
	1504	0.382280524	0.335316548	0.624144835	0.341472541	0.36569526	0.276155659	0.318311657	0.354255655	0.30727907	0.219963364	0.34045163	0.375742109	0.279851837	0.297547084	0.361685301	0.329494708	0.194192188	0.251711075	0.350556551	0.240290991	0.330549968	0.403991407	0.376762512	0.202681166	0.150498746	0.324970709	0.571253788	0.422001509	0.725828452	0.38353975	0.214969701	0.364768249	0.265685933	0.42745699	0.246061873	0.333891048	0.260236595	0.362630902	0.389667558	0.433625276	0.297406093	0.365996935	0.429301156	0.416793951	0.368154327	0.404296038	0.439840958	0.522182239
	1508	0.395794876	0.374077023	0.542572262	0.36269445	0.398636654	0.297236067	0.350300879	0.3608049	0.326931456	0.222323647	0.360393602	0.388047714	0.301300687	0.336037668	0.365022745	0.350648441	0.222986089	0.292335142	0.368762674	0.24824676	0.333158841	0.388590722	0.337494351	0.211317814	0.176295016	0.343838614	0.541308331	0.437199233	0.709412767	0.376865744	0.228371609	0.431842091	0.280259236	0.427942655	0.247460508	0.350576669	0.270388288	0.343370332	0.425317627	0.442535534	0.332581708	0.385902956	0.454846524	0.428390378	0.419015487	0.51513708	0.529290573	0.557796136
	1512	0.391869669	0.389449278	0.447043511	0.369182156	0.415071196	0.298165219	0.381358662	0.369225621	0.345392802	0.221882061	0.36543369	0.397957962	0.310742186	0.355558712	0.34852996	0.357923789	0.23197066	0.301762994	0.37164299	0.250855516	0.299173776	0.372025213	0.31601442	0.233303616	0.192443709	0.351872122	0.484311436	0.435479782	0.662476552	0.401710977	0.244271414	0.514091142	0.278714427	0.419906432	0.245906374	0.360991106	0.269652498	0.300785116	0.457937958	0.477705124	0.378179224	0.415336903	0.46631907	0.431450584	0.485997344	0.593001716	0.633152944	0.55642858
	1516	0.365983785	0.377501169	0.353039618	0.352785036	0.406385794	0.278979669	0.392861506	0.370271494	0.353618757	0.213530849	0.349266758	0.39607095	0.306864084	0.348553607	0.320828659	0.341929043	0.214288439	0.275675386	0.351745417	0.245551741	0.244375923	0.35481896	0.31779651	0.273251968	0.189852578	0.335050657	0.417508531	0.408650081	0.598755461	0.45814345	0.258217948	0.589170302	0.259694758	0.404538253	0.233783427	0.353814872	0.253748104	0.24913709	0.467256931	0.53739678	0.39369919	0.436825342	0.452457626	0.415133543	0.557704006	0.599189113	0.716669506	0.51512567
	1520	0.324748733	0.346415279	0.2734653	0.316661614	0.375892251	0.244971389	0.37514081	0.358083458	0.344247703	0.19614799	0.313848091	0.376415851	0.28718272	0.314800468	0.286370293	0.307663591	0.17677489	0.223477377	0.311609829	0.238689308	0.194798408	0.333389242	0.333842929	0.332572541	0.162852283	0.294122424	0.358544631	0.362485225	0.538892025	0.533770826	0.270177598	0.633891567	0.224314989	0.380014991	0.210720179	0.327509495	0.225811611	0.202316763	0.452531308	0.604547067	0.375845229	0.434410138	0.413471636	0.376692843	0.61965491	0.542524992	0.749558415	0.447031835
	1524	0.284954559	0.310965633	0.219566877	0.276120247	0.338100489	0.21327612	0.334808457	0.33660077	0.317730062	0.174902406	0.269928772	0.342499572	0.259005732	0.270334421	0.255746313	0.272625588	0.136906825	0.176355372	0.264571875	0.240573305	0.177563109	0.306425343	0.348753251	0.406172291	0.127272716	0.244957033	0.320077388	0.315888785	0.502300083	0.608163006	0.285836207	0.635859844	0.186695203	0.347262023	0.186529271	0.293347336	0.191198854	0.176593367	0.420902268	0.655996782	0.331705635	0.404193474	0.365038245	0.326857934	0.658889929	0.456022039	0.721718424	0.37675493
	1528	0.264688879	0.283795814	0.198665784	0.250807679	0.310851898	0.20539598	0.291644362	0.318157669	0.283295038	0.158662953	0.232053486	0.306302683	0.235390576	0.240018577	0.243950559	0.255795519	0.121551064	0.169472667	0.228459616	0.259496271	0.198732444	0.278508086	0.351321077	0.480264454	0.116395116	0.211021216	0.305780614	0.290985277	0.497922075	0.661232718	0.311261561	0.59892181	0.171068595	0.31343112	0.178012699	0.268485228	0.161439387	0.181357404	0.396196017	0.673381922	0.285546403	0.362823041	0.329400833	0.284847906	0.667672406	0.377979609	0.64686727	0.32839347
	1532	0.271668905	0.26893889	0.209043149	0.252461212	0.304699951	0.229718556	0.266337414	0.314531353	0.254436185	0.153910949	0.210628924	0.280266642	0.232853349	0.251943991	0.256708149	0.264568742	0.145576529	0.215240151	0.215645721	0.294658785	0.230354443	0.258030424	0.341511121	0.533578651	0.150686849	0.208915921	0.309657133	0.299964398	0.519056562	0.681019816	0.346409316	0.539309733	0.187335647	0.28914232	0.190702066	0.263352042	0.158182888	0.204068328	0.399039279	0.649688485	0.275123534	0.325495594	0.324162809	0.2678315	0.644878053	0.332083271	0.552709014	0.317318768
	1536	0.296861623	0.26134391	0.236563071	0.276305423	0.316234512	0.267791997	0.266900596	0.32690072	0.239285928	0.159587569	0.206079016	0.268708506	0.244713272	0.29022604	0.276370738	0.288830055	0.197531464	0.285493663	0.225431747	0.33325055	0.247253139	0.251327678	0.330489564	0.543539294	0.218074268	0.23540425	0.319807662	0.33714469	0.546111208	0.666984276	0.381568347	0.47551093	0.217693942	0.281073485	0.218466106	0.272614589	0.180510211	0.225757402	0.430380626	0.589442843	0.306499919	0.305421446	0.349708313	0.279634573	0.595153829	0.317913609	0.464854099	0.340561928
	1540	0.318866695	0.251717837	0.258219363	0.302743727	0.330094593	0.296863253	0.283223129	0.342874018	0.236515233	0.167222566	0.209289414	0.268662775	0.262054608	0.329423995	0.288882363	0.307220178	0.25027881	0.345023353	0.244490955	0.355349652	0.237669673	0.258140038	0.334546342	0.496273843	0.291904327	0.266848854	0.32566242	0.381859403	0.557021317	0.627900525	0.400583582	0.418872798	0.240958745	0.28602443	0.244963024	0.277477851	0.209548171	0.234281199	0.467684364	0.504870078	0.3510832	0.305152442	0.387637415	0.308236266	0.527124144	0.316589522	0.395194599	0.380526722
	1544	0.314744897	0.235905647	0.25724085	0.309612595	0.329751188	0.298422111	0.294329875	0.344206281	0.237093633	0.16715472	0.204874459	0.260047996	0.261346228	0.335555422	0.285525771	0.302538288	0.280492016	0.364682147	0.25569044	0.34539103	0.20622445	0.272553431	0.366735601	0.405333752	0.336906903	0.276729719	0.325184725	0.410973301	0.540301532	0.576586868	0.390166681	0.365921246	0.242789376	0.292288685	0.25024422	0.266886323	0.227043505	0.214797145	0.48333398	0.404016785	0.367578137	0.305746677	0.411106034	0.334061151	0.451923801	0.306940288	0.328635548	0.414966373
	1548	0.283317124	0.217875495	0.23112191	0.287828098	0.305470774	0.270347157	0.284276659	0.321942938	0.231521222	0.156938985	0.191872994	0.236235978	0.24863008	0.311764658	0.270411849	0.276370604	0.277702905	0.343292787	0.250111719	0.303762386	0.181179359	0.289030044	0.430450598	0.299354221	0.327978626	0.259096319	0.327510251	0.413391677	0.503234085	0.524902622	0.3498307	0.318693853	0.20957985	0.288789922	0.233184318	0.233867707	0.224367038	0.180728667	0.451817346	0.312397989	0.329108591	0.290749441	0.404583986	0.345092754	0.382221339	0.281362999	0.271474796	0.429904541
	1552	0.242110404	0.208961263	0.192016875	0.24986351	0.269272281	0.226624799	0.255930237	0.283649344	0.221827914	0.145596929	0.177537572	0.206486824	0.226455339	0.265780867	0.267409503	0.252267111	0.258040652	0.316753838	0.234036717	0.250402045	0.200151434	0.308512482	0.51730579	0.207990767	0.27405697	0.222492045	0.34822241	0.397104201	0.469512068	0.481185123	0.29543455	0.277407731	0.162164483	0.275784436	0.203166876	0.198745737	0.200836027	0.154251219	0.356254299	0.247754012	0.223991115	0.264390795	0.373865416	0.345777197	0.330705045	0.251146044	0.223723478	0.423203616
	1556	0.221325564	0.220822794	0.1727776	0.224036073	0.242903558	0.202295042	0.232102716	0.254491151	0.223398899	0.149398061	0.177605902	0.193335036	0.210822128	0.235419268	0.3081573	0.263277076	0.254848331	0.337416745	0.225684439	0.21603738	0.28801063	0.338670066	0.609236305	0.171007051	0.21437698	0.200736972	0.398621215	0.38360358	0.466287554	0.449909946	0.252553799	0.24936347	0.140256875	0.268249797	0.187111317	0.197975828	0.181053557	0.160186915	0.257800337	0.224310299	0.115500944	0.243137901	0.344656239	0.354612758	0.306954078	0.238025038	0.195194311	0.406255634
	1560	0.244467131	0.257255413	0.201657367	0.236476991	0.246477227	0.22630621	0.241278212	0.260655905	0.25194509	0.180515236	0.205205636	0.214263843	0.219469197	0.256449577	0.40963157	0.32981597	0.295146865	0.43811242	0.242374934	0.22430521	0.435175541	0.386392137	0.683243509	0.207381861	0.193864426	0.225625515	0.474687553	0.392518044	0.507069696	0.431889657	0.242277701	0.244860602	0.176536291	0.287167269	0.208148684	0.258839949	0.193984312	0.208206607	0.187641722	0.246203695	0.046107986	0.248527984	0.345748495	0.389381421	0.313069023	0.257672429	0.198068741	0.393798545
	1564	0.313037282	0.307255038	0.27770822	0.291481351	0.283294464	0.298633524	0.295942862	0.309461551	0.309309598	0.235554663	0.26262375	0.279722828	0.268270275	0.346149335	0.555180103	0.441306467	0.37649506	0.60293307	0.286139553	0.274866373	0.596419411	0.447101467	0.717223557	0.293851653	0.23233033	0.302623992	0.553061816	0.42604466	0.580375752	0.423898184	0.267579912	0.272764154	0.267642192	0.342675005	0.271349159	0.369253834	0.250766324	0.29265461	0.173561625	0.309144928	0.055934951	0.300695356	0.387634687	0.449786489	0.340431716	0.306137059	0.246914155	0.393318059
	1568	0.393552495	0.34912863	0.36821113	0.363681055	0.338415196	0.384702748	0.378166191	0.377909914	0.376696205	0.29251056	0.325590864	0.365572115	0.329988098	0.462322157	0.69314855	0.554608634	0.460629584	0.765276274	0.337900356	0.338961712	0.708276981	0.499592685	0.696067214	0.383724179	0.307760679	0.395887414	0.598562265	0.463822829	0.651940211	0.424324655	0.309272368	0.317678934	0.383373308	0.420535824	0.345808759	0.491844358	0.331334064	0.372022171	0.221800917	0.376573608	0.146730407	0.384645559	0.451141949	0.510418338	0.370783843	0.358650036	0.311806168	0.399794063
	1572	0.440804627	0.359862506	0.427607193	0.4095596	0.378407294	0.440690453	0.444457708	0.427430623	0.420275742	0.320414092	0.362850095	0.428508278	0.373780517	0.547278118	0.758413326	0.613353963	0.494005989	0.838738017	0.366117686	0.384307597	0.718323858	0.51320591	0.626922804	0.433929437	0.366683554	0.457805235	0.588965613	0.482951712	0.68398409	0.422268335	0.335612486	0.356717464	0.463681148	0.483620218	0.389671681	0.565986146	0.391428184	0.405922444	0.325605957	0.413477917	0.282252821	0.460771522	0.496552624	0.533454381	0.388213629	0.385466586	0.361822234	0.399545368
	1576	0.422434029	0.328652052	0.41916573	0.398838111	0.378214796	0.428462449	0.451699977	0.425229733	0.411526688	0.301284864	0.350624319	0.430722619	0.372793382	0.551335207	0.710463174	0.58307281	0.449928445	0.772199855	0.3469546	0.373161471	0.614084151	0.47159671	0.518973005	0.416776037	0.365394689	0.449975172	0.516061604	0.458288774	0.659137805	0.407346003	0.32654166	0.366449411	0.460552832	0.492090587	0.372224714	0.545950218	0.389274685	0.37271988	0.410697926	0.396751947	0.37518092	0.486366263	0.494216036	0.497989532	0.375594345	0.368035031	0.369408564	0.381281298
	1580	0.343876741	0.267372882	0.335535554	0.327399079	0.338723551	0.349179724	0.385994356	0.36029755	0.340775879	0.237435104	0.291292177	0.367779772	0.325468776	0.467388209	0.55799392	0.468062173	0.322421988	0.573175323	0.284809683	0.303232936	0.436173396	0.377885357	0.4010907	0.330317238	0.286222519	0.364767043	0.404561982	0.38621364	0.579198753	0.384234933	0.27667427	0.339267243	0.371886804	0.430994853	0.29859926	0.432225976	0.317549103	0.287732449	0.450306347	0.332945246	0.393149309	0.443565047	0.431503775	0.401536617	0.338409585	0.309949253	0.330139865	0.347648577
	1584	0.255137922	0.21183927	0.227531123	0.241840159	0.294544894	0.25260548	0.285428965	0.275976287	0.251882298	0.165946776	0.220876988	0.281904982	0.266022851	0.345371332	0.372412513	0.327155879	0.178540135	0.331672523	0.219919943	0.223076891	0.26763377	0.278582159	0.317656498	0.228653148	0.177885467	0.254120053	0.311770509	0.306886824	0.490510062	0.372472466	0.216515818	0.293581616	0.253268895	0.331742003	0.217287429	0.286416735	0.220249656	0.204542388	0.443111021	0.264253591	0.350644347	0.360840925	0.348616899	0.295492673	0.302785542	0.248217098	0.272170435	0.319580951
	1588	0.232776674	0.211329293	0.18268285	0.219312455	0.302972518	0.219620955	0.231023713	0.249217504	0.222751391	0.142290488	0.19862846	0.249538658	0.255352208	0.275412878	0.260636976	0.248904378	0.119746436	0.179918805	0.215720464	0.209874084	0.202546443	0.246224518	0.312328537	0.194817917	0.132697622	0.206396567	0.301294483	0.282420847	0.457293964	0.39717679	0.19626352	0.269701089	0.197825659	0.267837961	0.203302912	0.208100547	0.180692584	0.196093788	0.41543271	0.255963268	0.308379828	0.309994666	0.317743068	0.258775058	0.306689611	0.233694024	0.247247854	0.329464647
	1592	0.344282446	0.309279787	0.285390076	0.331627916	0.417589473	0.324675183	0.311217354	0.351761563	0.327278557	0.214730351	0.281551053	0.346329005	0.354272776	0.345943678	0.317699936	0.311924939	0.232973058	0.231908148	0.329922306	0.323090296	0.307141551	0.348643964	0.402539538	0.30459782	0.242485622	0.305128889	0.407615927	0.359126383	0.529949362	0.48989795	0.262080893	0.311381164	0.292358904	0.324238072	0.323480715	0.289156263	0.283137511	0.322881779	0.408777519	0.368380587	0.345837634	0.3754934	0.407806052	0.360099655	0.378173525	0.304034501	0.306026149	0.405581406
	1596	0.612644251	0.522859256	0.567539952	0.602145552	0.65926009	0.596819013	0.574413386	0.610779715	0.595041422	0.395904992	0.495707656	0.606689024	0.591671857	0.597947743	0.577923152	0.543279133	0.537083546	0.521949972	0.583434455	0.595871094	0.590761136	0.608856923	0.590862418	0.581073098	0.541414676	0.579863777	0.633366947	0.559338336	0.718229113	0.66803133	0.426807485	0.442105718	0.572309544	0.553228013	0.601282095	0.565746725	0.567117793	0.603130624	0.459009264	0.62598471	0.520264134	0.609956912	0.641086561	0.616681772	0.532650035	0.466968	0.47042312	0.555780818
	1600	1	0.830852919	1	1	1	1	1	1	1	0.66183323	0.819172242	1	0.944469185	1	1	0.911467428	1	1	0.944062839	1	1	1	0.844479151	1	1	1	0.93767858	0.862977654	1	0.915584049	0.673427238	0.649403193	1	0.942526859	1	1	1	1	0.57779733	1	0.833780444	1	0.993899952	1	0.750067176	0.698356149	0.718613599	0.759543779
[truncated: 93 more columns]
