# Supplementary material for: Causality Analysis and Cell Network Modeling of Spatial Calcium Signaling Patterns in Liver Lobules
Source: Front Physiol. 2018 Oct 4;9:1377. doi: 10.3389/fphys.2018.01377 (PMC6180170; doi:10.3389/fphys.2018.01377)
Supplement: Supplementary file 1 [file Data_Sheet_1.ZIP › Vadigepalli-Supplementary-Data-Code/Fig6_params.txt]

Original ID	Alias	X (px)	Y (px)	Distance from CV (px)	Distance from CV (um)	k_r	k_ip3
Cell 637	Cell 1	478.6097561	229.504065	221.2280761	353.9649217	1.378089481	0.776719709
Cell 638	Cell 2	478.6234568	211.9135802	203.8750855	326.2001367	1.716804551	0.721078693
Cell 687	Cell 3	491.5073529	202.7647059	197.561765	316.0988241	1.223760286	0.780166413
Cell 636	Cell 4	488.0163043	218.2391304	211.861965	338.979144	1.294779531	0.895116311
Cell 639	Cell 5	473.425	221.675	212.7199714	340.3519543	1.525651627	0.871417614
Cell 641	Cell 6	464.5251799	215.352518	205.3807065	328.6091305	1.474953545	0.840351138
Cell 677	Cell 7	465.9178082	204.4794521	194.7169451	311.5471121	1.051844176	0.772220049
Cell 643	Cell 8	439.1185185	214.7777778	203.8362372	326.1379795	1.577376439	0.716985815
Cell 644	Cell 9	428.69375	208.31875	197.9115216	316.6584346	1.785713559	0.870510378
Cell 678	Cell 10	453.4207317	196.6829268	185.9217564	297.4748102	1.095198111	0.812366595
Cell 679	Cell 11	441.4848485	196.1333333	185.1504175	296.2406679	1.576156134	0.808214376
Cell 681	Cell 12	422.0783133	184.753012	175.1304358	280.2086972	1.057471847	0.78745742
Cell 682	Cell 13	413.3333333	177.7716049	169.5677229	271.3083566	1.6102938	0.867403298
Cell 683	Cell 14	402.9920635	167.1746032	161.468751	258.3500016	1.711031846	0.867868066
Cell 696	Cell 15	407.4586466	159.3157895	152.7509212	244.4014739	1.320796937	0.882547884
Cell 689	Cell 16	474.5428571	187.8285714	179.4469553	287.1151286	1.161922841	0.758581877
Cell 690	Cell 17	463.7065217	187.6141304	177.7101518	284.3362429	1.372906421	0.830408389
Cell 691	Cell 18	469.0422535	179.2323944	170.0860164	272.1376263	1.02290739	0.785132279
Cell 680	Cell 19	435.4039735	187.5562914	176.7654256	282.824681	1.515480376	0.822603244
Cell 692	Cell 20	452.1949153	177.2118644	166.413763	266.2620207	1.57187492	0.822359094
Cell 695	Cell 21	420.1419355	162.7096774	153.5741953	245.7187125	1.668382189	0.75971883
Cell 713	Cell 22	416.1631206	149.929078	141.6904392	226.7047028	1.951814156	0.77383896
Cell 714	Cell 23	405.887931	145.0603448	139.3725434	222.9960694	1.72411237	0.804230081
Cell 693	Cell 24	443.8362069	176.7068966	165.7069776	265.1311641	1.283798289	0.782838204
Cell 707	Cell 25	455.6573427	168.6153846	158.0458892	252.8734228	1.475606702	0.806764144
Cell 708	Cell 26	444.8403361	163.0252101	152.0275326	243.2440522	1.929192313	0.710277359
Cell 716	Cell 27	403.0413793	130.5310345	126.3537764	202.1660423	1.246427458	0.744005669
Cell 717	Cell 28	400.0948905	120.2992701	117.7878987	188.460638	1.626965333	0.819575378
Cell 741	Cell 29	410.0131579	118.1973684	112.4561302	179.9298084	1.302966235	0.782349959
Cell 742	Cell 30	397.8266667	106.4266667	106.0104968	169.6167948	1.701614712	0.837785985
Cell 816	Cell 31	349.5751634	115.751634	141.028205	225.6451279	1.707986446	0.888386752
Cell 745	Cell 32	375.1304348	99.70434783	112.3008385	179.6813416	1.950569447	0.771708961
Cell 729	Cell 33	481.0192308	170.1057692	163.3556526	261.3690442	1.762878212	0.855291707
Cell 726	Cell 34	499.4834437	183.4966887	181.2002211	289.9203538	1.466473604	0.745593762
Cell 730	Cell 35	489.2831325	158.3975904	154.1966658	246.7146653	1.808342745	0.823793994
Cell 727	Cell 36	480.6037736	177.3207547	170.3009973	272.4815957	1.843387428	0.802047987
Cell 728	Cell 37	493	171.1616766	167.4895897	267.9833435	1.10136343	0.888885597
Cell 731	Cell 38	477.3571429	154.7738095	147.5927074	236.1483319	1.047230776	0.735762864
Cell 734	Cell 39	450.7425743	133.049505	122.2356085	195.5769736	1.069956239	0.881885913
Cell 787	Cell 40	477.5939394	133.0424242	126.5816182	202.5305891	1.831921562	0.844837547
Cell 733	Cell 41	453.4697987	137.0268456	126.3821305	202.2114087	1.951637054	0.727918745
Cell 737	Cell 42	458.9815951	122.4723926	112.4746305	179.9594088	1.831356299	0.842145113
Cell 762	Cell 43	453.7615385	113.1076923	102.5732346	164.1171754	1.382360962	0.767980332
Cell 715	Cell 44	411.0661157	135.7768595	129.0500112	206.480018	1.083044575	0.838964419
Cell 743	Cell 45	392.6666667	102.4215686	104.8475766	167.7561225	1.795612947	0.892448501
Cell 755	Cell 46	384.4915254	92.91525424	101.2490367	161.9984587	1.607461559	0.745493717
Cell 746	Cell 47	368.3142857	93.25714286	111.7790897	178.8465436	1.271208901	0.82348304
Cell 754	Cell 48	377.3983051	84.80508475	99.41315958	159.0610553	1.18398586	0.719796241
Cell 747	Cell 49	363.5666667	85.03333333	109.3181392	174.9090227	1.607207802	0.879484546
Cell 753	Cell 50	367.958042	72.98601399	98.10527665	156.9684426	1.483418739	0.784505617
Cell 749	Cell 51	345.2890625	60.9765625	110.6413394	177.026143	1.924373307	0.752204347
Cell 751	Cell 52	354.2428571	62.52142857	103.4930061	165.5888097	1.476110823	0.710816653
Cell 752	Cell 53	362.1238095	66.42857143	98.87384438	158.198151	1.949200927	0.712689217
Cell 812	Cell 54	337.3833333	71.94166667	122.8047245	196.4875592	1.322969458	0.85431877
Cell 775	Cell 55	356.4586466	46.12781955	94.32630737	150.9220918	1.442152644	0.705278643
Cell 773	Cell 56	374.1225806	62.95483871	87.07559364	139.3209498	1.456219361	0.875815057
Cell 774	Cell 57	364.2323232	57.57575758	92.36981897	147.7917103	1.12067546	0.748465427
Cell 758	Cell 58	395.7704918	88.04918033	90.89918399	145.4386944	1.14724663	0.755898282
Cell 757	Cell 59	404.5677419	93.83225806	91.739228	146.7827648	1.916549976	0.85370882
Cell 767	Cell 60	422.5597015	91.23134328	83.04670279	132.8747245	1.574117499	0.835343874
Cell 768	Cell 61	413.6453901	83.37588652	78.48357339	125.5737174	1.717329544	0.832725003
Cell 769	Cell 62	399.9082569	77.44954128	79.74724664	127.5955946	1.418483414	0.810690383
Cell 756	Cell 63	410.7375887	101.5886525	96.50228996	154.4036639	1.91273496	0.786280742
Cell 759	Cell 64	420.2416107	112.9865772	104.7173481	167.5477569	1.767849618	0.844723181
Cell 760	Cell 65	430.2605042	111.6890756	101.6221614	162.5954583	1.485522482	0.743252038
Cell 764	Cell 66	447.368932	105.0485437	94.10886396	150.5741823	1.988521097	0.781141031
Cell 785	Cell 67	450.3364486	97.57009346	86.80168007	138.8826881	1.487607367	0.723461864
Cell 789	Cell 68	469.2039474	109.0394737	101.2273548	161.9637677	1.079742978	0.830946599
Cell 761	Cell 69	439.060241	117.0481928	106.1631782	169.8610852	1.999714849	0.876099516
Cell 765	Cell 70	436.1775701	99.27102804	88.61695549	141.7871288	1.888895077	0.889875888
Cell 766	Cell 71	432.1238938	92.10619469	81.97107243	131.1537159	1.442942298	0.765893834
Cell 784	Cell 72	441.6081081	86.55405405	75.59190585	120.9470494	1.380024877	0.802727606
Cell 783	Cell 73	432.0704225	80.52816901	70.54417839	112.8706854	1.890612939	0.786575258
Cell 770	Cell 74	408.6785714	72.2	70.66146983	113.0583517	1.028269317	0.833743168
Cell 771	Cell 75	399.9913793	64.75	69.46813079	111.1490093	1.614190033	0.87034104
Cell 780	Cell 76	411.7226891	59.33613445	58.12234246	92.99574793	1.312608916	0.802262814
Cell 772	Cell 77	392.0268456	54.29530201	67.64386117	108.2301779	1.782319782	0.829042968
Cell 779	Cell 78	404.5590551	53.90551181	58.27925084	93.24680134	1.255253704	0.795412593
Cell 778	Cell 79	397.9015152	47.85606061	59.02067015	94.43307223	1.383434748	0.766349082
Cell 777	Cell 80	380.9192547	50.03726708	74.18280561	118.692489	1.513306898	0.85411848
Cell 782	Cell 81	428.4566929	73.05511811	63.97211955	102.3553913	1.376206852	0.874484597
Cell 781	Cell 82	418.5611511	65.46043165	60.10884834	96.17415735	1.260890144	0.757382284
Cell 795	Cell 83	451.3658537	78.18902439	67.59157343	108.1465175	1.978679108	0.773303482
Cell 794	Cell 84	461.5729167	87.60416667	78.59392949	125.7502872	1.131094026	0.870014183
Cell 788	Cell 85	474.0846154	122.9307692	115.9033269	185.445323	1.391089526	0.886065785
Cell 791	Cell 86	482.6619718	111.8732394	108.0285078	172.8456124	1.257665206	0.823965462
Cell 793	Cell 87	468.4492754	96.21014493	88.64838333	141.8374133	1.220611963	0.87002759
Cell 797	Cell 88	480.8322581	93.59354839	90.43400617	144.6944099	1.82220082	0.779059841
Cell 798	Cell 89	473.203252	83.51219512	78.17191547	125.0750648	1.051354966	0.721110252
Cell 799	Cell 90	468.1630435	73.70652174	67.20089687	107.521435	1.827236288	0.869370919
Cell 800	Cell 91	453.2719298	67.12280702	56.88354903	91.01367844	1.591837306	0.796146705
Cell 807	Cell 92	478.7606838	64.7008547	63.96942187	102.351075	1.458096097	0.728788788
Cell 808	Cell 93	470.6134454	61.15966387	56.78263252	90.85221203	1.546795722	0.871991645
Cell 796	Cell 94	437.5178571	68.13095238	57.49751209	91.99601934	1.476888909	0.823735264
Cell 809	Cell 95	459.809816	55.62576687	47.34352491	75.74963985	1.412188647	0.745288099
Cell 801	Cell 96	445.129771	60.52671756	49.53960168	79.26336269	1.122483858	0.870398898
Cell 806	Cell 97	486.1465969	74.96335079	76.60056054	122.5608969	1.854451462	0.778383578
Cell 802	Cell 98	435.432	54.496	44.33184679	70.93095487	1.975055484	0.775559603
Cell 813	Cell 99	342.511811	82.38582677	124.0797678	198.5276284	1.206458064	0.809527036
Cell 826	Cell 100	332.5961538	83.78846154	133.0750806	212.920129	1.481196626	0.73145628
Cell 831	Cell 101	323.2806122	72.73979592	135.5911981	216.9459169	1.565785202	0.88697491
Cell 748	Cell 102	353.1928934	74.2893401	110.686364	177.0981824	1.660193601	0.701776712
Cell 825	Cell 103	337.9329609	97.08938547	136.6074635	218.5719415	1.477303566	0.882234819
Cell 814	Cell 104	348.3463687	93.53072626	126.3366058	202.1385692	1.771351306	0.806833695
Cell 815	Cell 105	355.8782051	104.3974359	128.407678	205.4522848	1.293303907	0.812113174
Cell 824	Cell 106	343.4424779	108.6106195	140.1415295	224.2264472	1.413566139	0.768162979
Cell 827	Cell 107	320.6097561	94.09146341	148.7593479	238.0149566	1.779888145	0.829641323
Cell 830	Cell 108	314.9076923	85.00769231	148.8017555	238.0828087	1.684183905	0.726334388
Cell 834	Cell 109	298.9352941	77.99411765	159.7872983	255.6596773	1.425067758	0.710759081
Cell 832	Cell 110	312.350365	64.49635036	142.1037857	227.366057	1.824307213	0.802219075
Cell 833	Cell 111	298.8253012	65.18674699	154.9577256	247.9323609	1.873131288	0.85092536
Cell 835	Cell 112	286.4166667	58.55555556	164.6026664	263.3642663	1.287382495	0.744453742
Cell 838	Cell 113	277.279661	85.28813559	182.5223234	292.0357174	1.839355158	0.743434995
Cell 839	Cell 114	286.4476744	85.56976744	174.3083059	278.8932895	1.547047579	0.786861703
Cell 829	Cell 115	296.7103825	88.94535519	166.642461	266.6279377	1.31849727	0.836718439
Cell 1297	Cell 116	483.1012658	43.10759494	50.59453172	80.95125075	1.657929911	0.720933527
Cell 1298	Cell 117	490.8206897	51.68275862	62.02631565	99.24210504	1.137994621	0.846853706
Cell 1295	Cell 118	475.9064039	52.6453202	52.46285643	83.94057028	1.484973585	0.882459432
Cell 1299	Cell 119	497.12	62.26857143	73.82547539	118.1207606	1.23030575	0.729440932
Cell 688	Cell 120	482.8978102	193.7007299	186.7956004	298.8729607	1.483666513	0.843343789
Cell 642	Cell 121	451.3815789	214.2171053	203.3511239	325.3617982	1.958971367	0.740988421
Cell 649	Cell 122	419.704918	202.9098361	193.4415576	309.5064921	1.067112721	0.868927115
Cell 697	Cell 123	395.2931034	152.6551724	149.7950254	239.6720407	1.309442107	0.761904265
Cell 732	Cell 124	468.3658537	164.3089431	155.2331371	248.3730194	1.179882598	0.826573759
Cell 694	Cell 125	431.4645161	168.0903226	157.5896818	252.1434909	1.195993829	0.703151547
Cell 709	Cell 126	435.0504202	157.1764706	146.4501811	234.3202897	1.450550887	0.860957991
Cell 740	Cell 127	416.9833333	126.0666667	118.1957616	189.1132186	1.89380187	0.885200444
Cell 724	Cell 128	350.9322034	128.1271186	149.6007242	239.3611587	1.347417762	0.889782595
Cell 725	Cell 129	370.1976744	110.3197674	123.7384316	197.9814906	1.812938325	0.728029721
Cell 744	Cell 130	385.1325301	108.5361446	113.9240032	182.2784052	1.79142802	0.716867059
Cell 735	Cell 131	469.5864662	142.3007519	133.77053	214.032848	1.096556772	0.765527035
Cell 736	Cell 132	465.5648855	133.3358779	124.2220242	198.7552388	1.160192115	0.884802258
Cell 738	Cell 133	445.0222222	124.4296296	113.4342356	181.494777	1.479459477	0.87256202
Cell 750	Cell 134	343.7592593	50.25925926	107.6545193	172.2472309	1.422930348	0.791795235
Cell 776	Cell 135	368.0649351	43.49350649	82.59516963	132.1522714	1.30644287	0.810472947
Cell 763	Cell 136	437.84	108.54	97.73431946	156.3749111	1.299368568	0.784953261
Cell 792	Cell 137	476.6068376	106.0940171	100.5289906	160.8463849	1.466901945	0.833965364
Cell 810	Cell 138	449.4493671	47.39240506	36.79813511	58.87701618	1.409797019	0.808020285
Cell 1296	Cell 139	466.308642	43.41975309	39.35372788	62.96596461	1.314017432	0.864415957
Cell 837	Cell 140	267.745098	87.91503268	192.3062992	307.6900788	1.974815654	0.863908301
Cell 1300	Cell 141	502.5231788	71.68874172	84.30946464	134.8951434	1.4565628	0.784490731
