# Supplementary material for: Causality Analysis and Cell Network Modeling of Spatial Calcium Signaling Patterns in Liver Lobules
Source: Front Physiol. 2018 Oct 4;9:1377. doi: 10.3389/fphys.2018.01377 (PMC6180170; doi:10.3389/fphys.2018.01377)
Supplement: Supplementary file 1 [file Data_Sheet_1.ZIP › Vadigepalli-Supplementary-Data-Code/Fig6C_data.txt]

Time (sec)	Cell 1	Cell 2	Cell 3	Cell 4	Cell 5	Cell 6	Cell 7	Cell 8	Cell 9	Cell 10	Cell 11	Cell 12	Cell 13	Cell 14	Cell 15	Cell 16	Cell 17	Cell 18	Cell 19	Cell 20	Cell 21	Cell 22	Cell 23	Cell 24	Cell 25	Cell 26	Cell 27	Cell 28	Cell 29	Cell 30	Cell 31	Cell 32	Cell 33	Cell 34	Cell 35	Cell 36	Cell 37	Cell 38	Cell 39	Cell 40	Cell 41	Cell 42	Cell 43	Cell 44	Cell 45	Cell 46	Cell 47	Cell 48	Cell 49
1	0.2	0.2	0.2	0.2	0.2	0.2	0.2	0.2	0.2	0.2	0.2	0.2	0.2	0.2	0.2	0.2	0.2	0.2	0.2	0.2	0.2	0.2	0.2	0.2	0.2	0.2	0.2	0.2	0.2	0.2	0.2	0.2	0.2	0.2	0.2	0.2	0.2	0.2	0.2	0.2	0.2	0.2	0.2	0.2	0.2	0.2	0.2	0.2	0.2
2	0.20519	0.20519	0.20519	0.20519	0.20519	0.20519	0.20519	0.20519	0.20519	0.20519	0.20519	0.20519	0.20519	0.20519	0.20519	0.20519	0.20519	0.20519	0.20519	0.20519	0.20519	0.20519	0.20519	0.20519	0.20519	0.20519	0.20519	0.20519	0.20519	0.20519	0.20519	0.20519	0.20519	0.20519	0.20519	0.20519	0.20519	0.20519	0.20519	0.20519	0.20519	0.20519	0.20519	0.20519	0.20519	0.20519	0.20519	0.20519	0.20519
3	0.20874	0.20874	0.20874	0.20874	0.20874	0.20874	0.20874	0.20874	0.20874	0.20874	0.20874	0.20874	0.20874	0.20874	0.20874	0.20874	0.20874	0.20874	0.20874	0.20874	0.20874	0.20874	0.20874	0.20874	0.20874	0.20874	0.20874	0.20874	0.20874	0.20874	0.20874	0.20874	0.20874	0.20874	0.20874	0.20874	0.20874	0.20874	0.20874	0.20874	0.20874	0.20874	0.20874	0.20874	0.20874	0.20874	0.20874	0.20874	0.20874
4	0.21224	0.21224	0.21224	0.21224	0.21224	0.21224	0.21224	0.21224	0.21224	0.21224	0.21224	0.21224	0.21224	0.21224	0.21224	0.21224	0.21224	0.21224	0.21224	0.21224	0.21224	0.21224	0.21224	0.21224	0.21224	0.21224	0.21224	0.21224	0.21224	0.21224	0.21224	0.21224	0.21224	0.21224	0.21224	0.21224	0.21224	0.21224	0.21224	0.21224	0.21224	0.21224	0.21224	0.21224	0.21224	0.21224	0.21224	0.21224	0.21224
5	0.21575	0.21575	0.21575	0.21575	0.21575	0.21575	0.21575	0.21575	0.21575	0.21575	0.21575	0.21575	0.21575	0.21575	0.21575	0.21575	0.21575	0.21575	0.21575	0.21575	0.21575	0.21575	0.21575	0.21575	0.21575	0.21575	0.21575	0.21575	0.21575	0.21575	0.21575	0.21575	0.21575	0.21575	0.21575	0.21575	0.21575	0.21575	0.21575	0.21575	0.21575	0.21575	0.21575	0.21575	0.21575	0.21575	0.21575	0.21575	0.21575
6	0.21931	0.21931	0.21931	0.21931	0.21931	0.21931	0.21931	0.21931	0.21931	0.21931	0.21931	0.21931	0.21931	0.21931	0.21931	0.21931	0.21931	0.21931	0.21931	0.21931	0.21931	0.21931	0.21931	0.21931	0.21931	0.21931	0.21931	0.21931	0.21931	0.21931	0.21931	0.21931	0.21931	0.21931	0.21931	0.21931	0.21931	0.21931	0.21931	0.21931	0.21931	0.21931	0.21931	0.21931	0.21931	0.21931	0.21931	0.21931	0.21931
7	0.22289	0.22289	0.22289	0.22289	0.22289	0.22289	0.22289	0.22289	0.22289	0.22289	0.22289	0.22289	0.22289	0.22289	0.22289	0.22289	0.22289	0.22289	0.22289	0.22289	0.22289	0.22289	0.22289	0.22289	0.22289	0.22289	0.22289	0.22289	0.22289	0.22289	0.22289	0.22289	0.22289	0.22289	0.22289	0.22289	0.22289	0.22289	0.22289	0.22289	0.22289	0.22289	0.22289	0.22289	0.22289	0.22289	0.22289	0.22289	0.22289
8	0.22651	0.22651	0.22651	0.22651	0.22651	0.22651	0.22651	0.22651	0.22651	0.22651	0.22651	0.22651	0.22651	0.22651	0.22651	0.22651	0.22651	0.22651	0.22651	0.22651	0.22651	0.22651	0.22651	0.22651	0.22651	0.22651	0.22651	0.22651	0.22651	0.22651	0.22651	0.22651	0.22651	0.22651	0.22651	0.22651	0.22651	0.22651	0.22651	0.22651	0.22651	0.22651	0.22651	0.22651	0.22651	0.22651	0.22651	0.22651	0.22651
9	0.23016	0.23016	0.23016	0.23016	0.23016	0.23016	0.23016	0.23016	0.23016	0.23016	0.23016	0.23016	0.23016	0.23016	0.23016	0.23016	0.23016	0.23016	0.23016	0.23016	0.23016	0.23016	0.23016	0.23016	0.23016	0.23016	0.23016	0.23016	0.23016	0.23016	0.23016	0.23016	0.23016	0.23016	0.23016	0.23016	0.23016	0.23016	0.23016	0.23016	0.23016	0.23016	0.23016	0.23016	0.23016	0.23016	0.23016	0.23016	0.23016
10	0.23384	0.23384	0.23384	0.23384	0.23384	0.23384	0.23384	0.23384	0.23384	0.23384	0.23384	0.23384	0.23384	0.23384	0.23384	0.23384	0.23384	0.23384	0.23384	0.23384	0.23384	0.23384	0.23384	0.23384	0.23384	0.23384	0.23384	0.23384	0.23384	0.23384	0.23384	0.23384	0.23384	0.23384	0.23384	0.23384	0.23384	0.23384	0.23384	0.23384	0.23384	0.23384	0.23384	0.23384	0.23384	0.23384	0.23384	0.23384	0.23384
11	0.23755	0.23755	0.23755	0.23755	0.23755	0.23755	0.23755	0.23755	0.23755	0.23755	0.23755	0.23755	0.23755	0.23755	0.23755	0.23755	0.23755	0.23755	0.23755	0.23755	0.23755	0.23755	0.23755	0.23755	0.23755	0.23755	0.23755	0.23755	0.23755	0.23755	0.23755	0.23755	0.23755	0.23755	0.23755	0.23755	0.23755	0.23755	0.23755	0.23755	0.23755	0.23755	0.23755	0.23755	0.23755	0.23755	0.23755	0.23755	0.23755
12	0.24129	0.24129	0.24129	0.24129	0.24129	0.24129	0.24129	0.24129	0.24129	0.24129	0.24129	0.24129	0.24129	0.24129	0.24129	0.24129	0.24129	0.24129	0.24129	0.24129	0.24129	0.24129	0.24129	0.24129	0.24129	0.24129	0.24129	0.24129	0.24129	0.24129	0.24129	0.24129	0.24129	0.24129	0.24129	0.24129	0.24129	0.24129	0.24129	0.24129	0.24129	0.24129	0.24129	0.24129	0.24129	0.24129	0.24129	0.24129	0.24129
13	0.24506	0.24506	0.24506	0.24506	0.24506	0.24506	0.24506	0.24506	0.24506	0.24506	0.24506	0.24506	0.24506	0.24506	0.24506	0.24506	0.24506	0.24506	0.24506	0.24506	0.24506	0.24506	0.24506	0.24506	0.24506	0.24506	0.24506	0.24506	0.24506	0.24506	0.24506	0.24506	0.24506	0.24506	0.24506	0.24506	0.24506	0.24506	0.24506	0.24506	0.24506	0.24506	0.24506	0.24506	0.24506	0.24506	0.24506	0.24506	0.24506
14	0.24884	0.24884	0.24884	0.24884	0.24884	0.24884	0.24884	0.24884	0.24884	0.24884	0.24884	0.24884	0.24884	0.24884	0.24884	0.24884	0.24884	0.24884	0.24884	0.24884	0.24884	0.24884	0.24884	0.24884	0.24884	0.24884	0.24884	0.24884	0.24884	0.24884	0.24884	0.24884	0.24884	0.24884	0.24884	0.24884	0.24884	0.24884	0.24884	0.24884	0.24884	0.24884	0.24884	0.24884	0.24884	0.24884	0.24884	0.24884	0.24884
15	0.25264	0.25264	0.25264	0.25264	0.25264	0.25264	0.25264	0.25264	0.25264	0.25264	0.25264	0.25264	0.25264	0.25264	0.25264	0.25264	0.25264	0.25264	0.25264	0.25264	0.25264	0.25264	0.25264	0.25264	0.25264	0.25264	0.25264	0.25264	0.25264	0.25264	0.25264	0.25264	0.25264	0.25264	0.25264	0.25264	0.25264	0.25264	0.25264	0.25264	0.25264	0.25264	0.25264	0.25264	0.25264	0.25264	0.25264	0.25264	0.25264
16	0.25645	0.25645	0.25645	0.25645	0.25645	0.25645	0.25645	0.25645	0.25645	0.25645	0.25645	0.25645	0.25645	0.25645	0.25645	0.25645	0.25645	0.25645	0.25645	0.25645	0.25645	0.25645	0.25645	0.25645	0.25645	0.25645	0.25645	0.25645	0.25645	0.25645	0.25645	0.25645	0.25645	0.25645	0.25645	0.25645	0.25645	0.25645	0.25645	0.25645	0.25645	0.25645	0.25645	0.25645	0.25645	0.25645	0.25645	0.25645	0.25645
17	0.26027	0.26027	0.26027	0.26027	0.26027	0.26027	0.26027	0.26027	0.26027	0.26027	0.26027	0.26027	0.26027	0.26027	0.26027	0.26027	0.26027	0.26027	0.26027	0.26027	0.26027	0.26027	0.26027	0.26027	0.26027	0.26027	0.26027	0.26027	0.26027	0.26027	0.26027	0.26027	0.26027	0.26027	0.26027	0.26027	0.26027	0.26027	0.26027	0.26027	0.26027	0.26027	0.26027	0.26027	0.26027	0.26027	0.26027	0.26027	0.26027
18	0.26408	0.26408	0.26408	0.26408	0.26408	0.26408	0.26408	0.26408	0.26408	0.26408	0.26408	0.26408	0.26408	0.26408	0.26408	0.26408	0.26408	0.26408	0.26408	0.26408	0.26408	0.26408	0.26408	0.26408	0.26408	0.26408	0.26408	0.26408	0.26408	0.26408	0.26408	0.26408	0.26408	0.26408	0.26408	0.26408	0.26408	0.26408	0.26408	0.26408	0.26408	0.26408	0.26408	0.26408	0.26408	0.26408	0.26408	0.26408	0.26408
19	0.26789	0.26789	0.26789	0.26789	0.26789	0.26789	0.26789	0.26789	0.26789	0.26789	0.26789	0.26789	0.26789	0.26789	0.26789	0.26789	0.26789	0.26789	0.26789	0.26789	0.26789	0.26789	0.26789	0.26789	0.26789	0.26789	0.26789	0.26789	0.26789	0.26789	0.26789	0.26789	0.26789	0.26789	0.26789	0.26789	0.26789	0.26789	0.26789	0.26789	0.26789	0.26789	0.26789	0.26789	0.26789	0.26789	0.26789	0.26789	0.26789
20	0.27169	0.27169	0.27169	0.27169	0.27169	0.27169	0.27169	0.27169	0.27169	0.27169	0.27169	0.27169	0.27169	0.27169	0.27169	0.27169	0.27169	0.27169	0.27169	0.27169	0.27169	0.27169	0.27169	0.27169	0.27169	0.27169	0.27169	0.27169	0.27169	0.27169	0.27169	0.27169	0.27169	0.27169	0.27169	0.27169	0.27169	0.27169	0.27169	0.27169	0.27169	0.27169	0.27169	0.27169	0.27169	0.27169	0.27169	0.27169	0.27169
21	0.27546	0.27546	0.27546	0.27546	0.27546	0.27546	0.27546	0.27546	0.27546	0.27546	0.27546	0.27546	0.27546	0.27546	0.27546	0.27546	0.27546	0.27546	0.27546	0.27546	0.27546	0.27546	0.27546	0.27546	0.27546	0.27546	0.27546	0.27546	0.27546	0.27546	0.27546	0.27546	0.27546	0.27546	0.27546	0.27546	0.27546	0.27546	0.27546	0.27546	0.27546	0.27546	0.27546	0.27546	0.27546	0.27546	0.27546	0.27546	0.27546
22	0.2792	0.2792	0.2792	0.2792	0.2792	0.2792	0.2792	0.2792	0.2792	0.2792	0.2792	0.2792	0.2792	0.2792	0.2792	0.2792	0.2792	0.2792	0.2792	0.2792	0.2792	0.2792	0.2792	0.2792	0.2792	0.2792	0.2792	0.2792	0.2792	0.2792	0.2792	0.2792	0.2792	0.2792	0.2792	0.2792	0.2792	0.2792	0.2792	0.2792	0.2792	0.2792	0.2792	0.2792	0.2792	0.2792	0.2792	0.2792	0.2792
23	0.2829	0.2829	0.2829	0.2829	0.2829	0.2829	0.2829	0.2829	0.2829	0.2829	0.2829	0.2829	0.2829	0.2829	0.2829	0.2829	0.2829	0.2829	0.2829	0.2829	0.2829	0.2829	0.2829	0.2829	0.2829	0.2829	0.2829	0.2829	0.2829	0.2829	0.2829	0.2829	0.2829	0.2829	0.2829	0.2829	0.2829	0.2829	0.2829	0.2829	0.2829	0.2829	0.2829	0.2829	0.2829	0.2829	0.2829	0.2829	0.2829
24	0.28656	0.28656	0.28656	0.28656	0.28656	0.28656	0.28656	0.28656	0.28656	0.28656	0.28656	0.28656	0.28656	0.28656	0.28656	0.28656	0.28656	0.28656	0.28656	0.28656	0.28656	0.28656	0.28656	0.28656	0.28656	0.28656	0.28656	0.28656	0.28656	0.28656	0.28656	0.28656	0.28656	0.28656	0.28656	0.28656	0.28656	0.28656	0.28656	0.28656	0.28656	0.28656	0.28656	0.28656	0.28656	0.28656	0.28656	0.28656	0.28656
25	0.29015	0.29015	0.29015	0.29015	0.29015	0.29015	0.29015	0.29015	0.29015	0.29015	0.29015	0.29015	0.29015	0.29015	0.29015	0.29015	0.29015	0.29015	0.29015	0.29015	0.29015	0.29015	0.29015	0.29015	0.29015	0.29015	0.29015	0.29015	0.29015	0.29015	0.29015	0.29015	0.29015	0.29015	0.29015	0.29015	0.29015	0.29015	0.29015	0.29015	0.29015	0.29015	0.29015	0.29015	0.29015	0.29015	0.29015	0.29015	0.29015
26	0.29367	0.29367	0.29367	0.29367	0.29367	0.29367	0.29367	0.29367	0.29367	0.29367	0.29367	0.29367	0.29367	0.29367	0.29367	0.29367	0.29367	0.29367	0.29367	0.29367	0.29367	0.29367	0.29367	0.29367	0.29367	0.29367	0.29367	0.29367	0.29367	0.29367	0.29367	0.29367	0.29367	0.29367	0.29367	0.29367	0.29367	0.29367	0.29367	0.29367	0.29367	0.29367	0.29367	0.29367	0.29367	0.29367	0.29367	0.29367	0.29367
27	0.29712	0.29712	0.29712	0.29712	0.29712	0.29712	0.29712	0.29712	0.29712	0.29712	0.29712	0.29712	0.29712	0.29712	0.29712	0.29712	0.29712	0.29712	0.29712	0.29712	0.29712	0.29712	0.29712	0.29712	0.29712	0.29712	0.29712	0.29712	0.29712	0.29712	0.29712	0.29712	0.29712	0.29712	0.29712	0.29712	0.29712	0.29712	0.29712	0.29712	0.29712	0.29712	0.29712	0.29712	0.29712	0.29712	0.29712	0.29712	0.29712
28	0.30047	0.30047	0.30047	0.30047	0.30047	0.30047	0.30047	0.30047	0.30047	0.30047	0.30047	0.30047	0.30047	0.30047	0.30047	0.30047	0.30047	0.30047	0.30047	0.30047	0.30047	0.30047	0.30047	0.30047	0.30047	0.30047	0.30047	0.30047	0.30047	0.30047	0.30047	0.30047	0.30047	0.30047	0.30047	0.30047	0.30047	0.30047	0.30047	0.30047	0.30047	0.30047	0.30047	0.30047	0.30047	0.30047	0.30047	0.30047	0.30047
29	0.30372	0.30372	0.30372	0.30372	0.30372	0.30372	0.30372	0.30372	0.30372	0.30372	0.30372	0.30372	0.30372	0.30372	0.30372	0.30372	0.30372	0.30372	0.30372	0.30372	0.30372	0.30372	0.30372	0.30372	0.30372	0.30372	0.30372	0.30372	0.30372	0.30372	0.30372	0.30372	0.30372	0.30372	0.30372	0.30372	0.30372	0.30372	0.30372	0.30372	0.30372	0.30372	0.30372	0.30372	0.30372	0.30372	0.30372	0.30372	0.30372
30	0.30687	0.30687	0.30687	0.30687	0.30687	0.30687	0.30687	0.30687	0.30687	0.30687	0.30687	0.30687	0.30687	0.30687	0.30687	0.30687	0.30687	0.30687	0.30687	0.30687	0.30687	0.30687	0.30687	0.30687	0.30687	0.30687	0.30687	0.30687	0.30687	0.30687	0.30687	0.30687	0.30687	0.30687	0.30687	0.30687	0.30687	0.30687	0.30687	0.30687	0.30687	0.30687	0.30687	0.30687	0.30687	0.30687	0.30687	0.30687	0.30687
31	0.30989	0.30989	0.30989	0.30989	0.30989	0.30989	0.30989	0.30989	0.30989	0.30989	0.30989	0.30989	0.30989	0.30989	0.30989	0.30989	0.30989	0.30989	0.30989	0.30989	0.30989	0.30989	0.30989	0.30989	0.30989	0.30989	0.30989	0.30989	0.30989	0.30989	0.30989	0.30989	0.30989	0.30989	0.30989	0.30989	0.30989	0.30989	0.30989	0.30989	0.30989	0.30989	0.30989	0.30989	0.30989	0.30989	0.30989	0.30989	0.30989
32	0.31278	0.31278	0.31278	0.31278	0.31278	0.31278	0.31278	0.31278	0.31278	0.31278	0.31278	0.31278	0.31278	0.31278	0.31278	0.31278	0.31278	0.31278	0.31278	0.31278	0.31278	0.31278	0.31278	0.31278	0.31278	0.31278	0.31278	0.31278	0.31278	0.31278	0.31278	0.31278	0.31278	0.31278	0.31278	0.31278	0.31278	0.31278	0.31278	0.31278	0.31278	0.31278	0.31278	0.31278	0.31278	0.31278	0.31278	0.31278	0.31278
33	0.31553	0.31553	0.31553	0.31553	0.31553	0.31553	0.31553	0.31553	0.31553	0.31553	0.31553	0.31553	0.31553	0.31553	0.31553	0.31553	0.31553	0.31553	0.31553	0.31553	0.31553	0.31553	0.31553	0.31553	0.31553	0.31553	0.31553	0.31553	0.31553	0.31553	0.31553	0.31553	0.31553	0.31553	0.31553	0.31553	0.31553	0.31553	0.31553	0.31553	0.31553	0.31553	0.31553	0.31553	0.31553	0.31553	0.31553	0.31553	0.31553
34	0.31813	0.31813	0.31813	0.31813	0.31813	0.31813	0.31813	0.31813	0.31813	0.31813	0.31813	0.31813	0.31813	0.31813	0.31813	0.31813	0.31813	0.31813	0.31813	0.31813	0.31813	0.31813	0.31813	0.31813	0.31813	0.31813	0.31813	0.31813	0.31813	0.31813	0.31813	0.31813	0.31813	0.31813	0.31813	0.31813	0.31813	0.31813	0.31813	0.31813	0.31813	0.31813	0.31813	0.31813	0.31813	0.31813	0.31813	0.31813	0.31813
35	0.32058	0.32058	0.32058	0.32058	0.32058	0.32058	0.32058	0.32058	0.32058	0.32058	0.32058	0.32058	0.32058	0.32058	0.32058	0.32058	0.32058	0.32058	0.32058	0.32058	0.32058	0.32058	0.32058	0.32058	0.32058	0.32058	0.32058	0.32058	0.32058	0.32058	0.32058	0.32058	0.32058	0.32058	0.32058	0.32058	0.32058	0.32058	0.32058	0.32058	0.32058	0.32058	0.32058	0.32058	0.32058	0.32058	0.32058	0.32058	0.32058
36	0.32286	0.32286	0.32286	0.32286	0.32286	0.32286	0.32286	0.32286	0.32286	0.32286	0.32286	0.32286	0.32286	0.32286	0.32286	0.32286	0.32286	0.32286	0.32286	0.32286	0.32286	0.32286	0.32286	0.32286	0.32286	0.32286	0.32286	0.32286	0.32286	0.32286	0.32286	0.32286	0.32286	0.32286	0.32286	0.32286	0.32286	0.32286	0.32286	0.32286	0.32286	0.32286	0.32286	0.32286	0.32286	0.32286	0.32286	0.32286	0.32286
37	0.32497	0.32497	0.32497	0.32497	0.32497	0.32497	0.32497	0.32497	0.32497	0.32497	0.32497	0.32497	0.32497	0.32497	0.32497	0.32497	0.32497	0.32497	0.32497	0.32497	0.32497	0.32497	0.32497	0.32497	0.32497	0.32497	0.32497	0.32497	0.32497	0.32497	0.32497	0.32497	0.32497	0.32497	0.32497	0.32497	0.32497	0.32497	0.32497	0.32497	0.32497	0.32497	0.32497	0.32497	0.32497	0.32497	0.32497	0.32497	0.32497
38	0.3269	0.3269	0.3269	0.3269	0.3269	0.3269	0.3269	0.3269	0.3269	0.3269	0.3269	0.3269	0.3269	0.3269	0.3269	0.3269	0.3269	0.3269	0.3269	0.3269	0.3269	0.3269	0.3269	0.3269	0.3269	0.3269	0.3269	0.3269	0.3269	0.3269	0.3269	0.3269	0.3269	0.3269	0.3269	0.3269	0.3269	0.3269	0.3269	0.3269	0.3269	0.3269	0.3269	0.3269	0.3269	0.3269	0.3269	0.3269	0.3269
39	0.32867	0.32867	0.32867	0.32867	0.32867	0.32867	0.32867	0.32867	0.32867	0.32867	0.32867	0.32867	0.32867	0.32867	0.32867	0.32867	0.32867	0.32867	0.32867	0.32867	0.32867	0.32867	0.32867	0.32867	0.32867	0.32867	0.32867	0.32867	0.32867	0.32867	0.32867	0.32867	0.32867	0.32867	0.32867	0.32867	0.32867	0.32867	0.32867	0.32867	0.32867	0.32867	0.32867	0.32867	0.32867	0.32867	0.32867	0.32867	0.32867
40	0.33025	0.33025	0.33025	0.33025	0.33025	0.33025	0.33025	0.33025	0.33025	0.33025	0.33025	0.33025	0.33025	0.33025	0.33025	0.33025	0.33025	0.33025	0.33025	0.33025	0.33025	0.33025	0.33025	0.33025	0.33025	0.33025	0.33025	0.33025	0.33025	0.33025	0.33025	0.33025	0.33025	0.33025	0.33025	0.33025	0.33025	0.33025	0.33025	0.33025	0.33025	0.33025	0.33025	0.33025	0.33025	0.33025	0.33025	0.33025	0.33025
41	0.33165	0.33165	0.33165	0.33165	0.33165	0.33165	0.33165	0.33165	0.33165	0.33165	0.33165	0.33165	0.33165	0.33165	0.33165	0.33165	0.33165	0.33165	0.33165	0.33165	0.33165	0.33165	0.33165	0.33165	0.33165	0.33165	0.33165	0.33165	0.33165	0.33165	0.33165	0.33165	0.33165	0.33165	0.33165	0.33165	0.33165	0.33165	0.33165	0.33165	0.33165	0.33165	0.33165	0.33165	0.33165	0.33165	0.33165	0.33165	0.33165
42	0.33286	0.33286	0.33286	0.33286	0.33286	0.33286	0.33286	0.33286	0.33286	0.33286	0.33286	0.33286	0.33286	0.33286	0.33286	0.33286	0.33286	0.33286	0.33286	0.33286	0.33286	0.33286	0.33286	0.33286	0.33286	0.33286	0.33286	0.33286	0.33286	0.33286	0.33286	0.33286	0.33286	0.33286	0.33286	0.33286	0.33286	0.33286	0.33286	0.33286	0.33286	0.33286	0.33286	0.33286	0.33286	0.33286	0.33286	0.33286	0.33286
43	0.3339	0.3339	0.3339	0.3339	0.3339	0.3339	0.3339	0.3339	0.3339	0.3339	0.3339	0.3339	0.3339	0.3339	0.3339	0.3339	0.3339	0.3339	0.3339	0.3339	0.3339	0.3339	0.3339	0.3339	0.3339	0.3339	0.3339	0.3339	0.3339	0.3339	0.3339	0.3339	0.3339	0.3339	0.3339	0.3339	0.3339	0.3339	0.3339	0.3339	0.3339	0.3339	0.3339	0.3339	0.3339	0.3339	0.3339	0.3339	0.3339
44	0.33476	0.33476	0.33476	0.33476	0.33476	0.33476	0.33476	0.33476	0.33476	0.33476	0.33476	0.33476	0.33476	0.33476	0.33476	0.33476	0.33476	0.33476	0.33476	0.33476	0.33476	0.33476	0.33476	0.33476	0.33476	0.33476	0.33476	0.33476	0.33476	0.33476	0.33476	0.33476	0.33476	0.33476	0.33476	0.33476	0.33476	0.33476	0.33476	0.33476	0.33476	0.33476	0.33476	0.33476	0.33476	0.33476	0.33476	0.33476	0.33476
45	0.33545	0.33545	0.33545	0.33545	0.33545	0.33545	0.33545	0.33545	0.33545	0.33545	0.33545	0.33545	0.33545	0.33545	0.33545	0.33545	0.33545	0.33545	0.33545	0.33545	0.33545	0.33545	0.33545	0.33545	0.33545	0.33545	0.33545	0.33545	0.33545	0.33545	0.33545	0.33545	0.33545	0.33545	0.33545	0.33545	0.33545	0.33545	0.33545	0.33545	0.33545	0.33545	0.33545	0.33545	0.33545	0.33545	0.33545	0.33545	0.33545
46	0.33597	0.33597	0.33597	0.33597	0.33597	0.33597	0.33597	0.33597	0.33597	0.33597	0.33597	0.33597	0.33597	0.33597	0.33597	0.33597	0.33597	0.33597	0.33597	0.33597	0.33597	0.33597	0.33597	0.33597	0.33597	0.33597	0.33597	0.33597	0.33597	0.33597	0.33597	0.33597	0.33597	0.33597	0.33597	0.33597	0.33597	0.33597	0.33597	0.33597	0.33597	0.33597	0.33597	0.33597	0.33597	0.33597	0.33597	0.33597	0.33597
47	0.33633	0.33633	0.33633	0.33633	0.33633	0.33633	0.33633	0.33633	0.33633	0.33633	0.33633	0.33633	0.33633	0.33633	0.33633	0.33633	0.33633	0.33633	0.33633	0.33633	0.33633	0.33633	0.33633	0.33633	0.33633	0.33633	0.33633	0.33633	0.33633	0.33633	0.33633	0.33633	0.33633	0.33633	0.33633	0.33633	0.33633	0.33633	0.33633	0.33633	0.33633	0.33633	0.33633	0.33633	0.33633	0.33633	0.33633	0.33633	0.33633
48	0.33654	0.33654	0.33654	0.33654	0.33654	0.33654	0.33654	0.33654	0.33654	0.33654	0.33654	0.33654	0.33654	0.33654	0.33654	0.33654	0.33654	0.33654	0.33654	0.33654	0.33654	0.33654	0.33654	0.33654	0.33654	0.33654	0.33654	0.33654	0.33654	0.33654	0.33654	0.33654	0.33654	0.33654	0.33654	0.33654	0.33654	0.33654	0.33654	0.33654	0.33654	0.33654	0.33654	0.33654	0.33654	0.33654	0.33654	0.33654	0.33654
49	0.33661	0.33661	0.33661	0.33661	0.33661	0.33661	0.33661	0.33661	0.33661	0.33661	0.33661	0.33661	0.33661	0.33661	0.33661	0.33661	0.33661	0.33661	0.33661	0.33661	0.33661	0.33661	0.33661	0.33661	0.33661	0.33661	0.33661	0.33661	0.33661	0.33661	0.33661	0.33661	0.33661	0.33661	0.33661	0.33661	0.33661	0.33661	0.33661	0.33661	0.33661	0.33661	0.33661	0.33661	0.33661	0.33661	0.33661	0.33661	0.33661
50	0.33655	0.33655	0.33655	0.33655	0.33655	0.33655	0.33655	0.33655	0.33655	0.33655	0.33655	0.33655	0.33655	0.33655	0.33655	0.33655	0.33655	0.33655	0.33655	0.33655	0.33655	0.33655	0.33655	0.33655	0.33655	0.33655	0.33655	0.33655	0.33655	0.33655	0.33655	0.33655	0.33655	0.33655	0.33655	0.33655	0.33655	0.33655	0.33655	0.33655	0.33655	0.33655	0.33655	0.33655	0.33655	0.33655	0.33655	0.33655	0.33655
51	0.33636	0.33636	0.33636	0.33636	0.33636	0.33636	0.33636	0.33636	0.33636	0.33636	0.33636	0.33636	0.33636	0.33636	0.33636	0.33636	0.33636	0.33636	0.33636	0.33636	0.33636	0.33636	0.33636	0.33636	0.33636	0.33636	0.33636	0.33636	0.33636	0.33636	0.33636	0.33636	0.33636	0.33636	0.33636	0.33636	0.33636	0.33636	0.33636	0.33636	0.33636	0.33636	0.33636	0.33636	0.33636	0.33636	0.33636	0.33636	0.33636
52	0.33607	0.33607	0.33607	0.33607	0.33607	0.33607	0.33607	0.33607	0.33607	0.33607	0.33607	0.33607	0.33607	0.33607	0.33607	0.33607	0.33607	0.33607	0.33607	0.33607	0.33607	0.33607	0.33607	0.33607	0.33607	0.33607	0.33607	0.33607	0.33607	0.33607	0.33607	0.33607	0.33607	0.33607	0.33607	0.33607	0.33607	0.33607	0.33607	0.33607	0.33607	0.33607	0.33607	0.33607	0.33607	0.33607	0.33607	0.33607	0.33607
53	0.33568	0.33568	0.33568	0.33568	0.33568	0.33568	0.33568	0.33568	0.33568	0.33568	0.33568	0.33568	0.33568	0.33568	0.33568	0.33568	0.33568	0.33568	0.33568	0.33568	0.33568	0.33568	0.33568	0.33568	0.33568	0.33568	0.33568	0.33568	0.33568	0.33568	0.33568	0.33568	0.33568	0.33568	0.33568	0.33568	0.33568	0.33568	0.33568	0.33568	0.33568	0.33568	0.33568	0.33568	0.33568	0.33568	0.33568	0.33568	0.33568
54	0.3352	0.3352	0.3352	0.3352	0.3352	0.3352	0.3352	0.3352	0.3352	0.3352	0.3352	0.3352	0.3352	0.3352	0.3352	0.3352	0.3352	0.3352	0.3352	0.3352	0.3352	0.3352	0.3352	0.3352	0.3352	0.3352	0.3352	0.3352	0.3352	0.3352	0.3352	0.3352	0.3352	0.3352	0.3352	0.3352	0.3352	0.3352	0.3352	0.3352	0.3352	0.3352	0.3352	0.3352	0.3352	0.3352	0.3352	0.3352	0.3352
55	0.33465	0.33465	0.33465	0.33465	0.33465	0.33465	0.33465	0.33465	0.33465	0.33465	0.33465	0.33465	0.33465	0.33465	0.33465	0.33465	0.33465	0.33465	0.33465	0.33465	0.33465	0.33465	0.33465	0.33465	0.33465	0.33465	0.33465	0.33465	0.33465	0.33465	0.33465	0.33465	0.33465	0.33465	0.33465	0.33465	0.33465	0.33465	0.33465	0.33465	0.33465	0.33465	0.33465	0.33465	0.33465	0.33465	0.33465	0.33465	0.33465
56	0.33405	0.33405	0.33405	0.33405	0.33405	0.33405	0.33405	0.33405	0.33405	0.33405	0.33405	0.33405	0.33405	0.33405	0.33405	0.33405	0.33405	0.33405	0.33405	0.33405	0.33405	0.33405	0.33405	0.33405	0.33405	0.33405	0.33405	0.33405	0.33405	0.33405	0.33405	0.33405	0.33405	0.33405	0.33405	0.33405	0.33405	0.33405	0.33405	0.33405	0.33405	0.33405	0.33405	0.33405	0.33405	0.33405	0.33405	0.33405	0.33405
57	0.33339	0.33339	0.33339	0.33339	0.33339	0.33339	0.33339	0.33339	0.33339	0.33339	0.33339	0.33339	0.33339	0.33339	0.33339	0.33339	0.33339	0.33339	0.33339	0.33339	0.33339	0.33339	0.33339	0.33339	0.33339	0.33339	0.33339	0.33339	0.33339	0.33339	0.33339	0.33339	0.33339	0.33339	0.33339	0.33339	0.33339	0.33339	0.33339	0.33339	0.33339	0.33339	0.33339	0.33339	0.33339	0.33339	0.33339	0.33339	0.33339
58	0.33269	0.33269	0.33269	0.33269	0.33269	0.33269	0.33269	0.33269	0.33269	0.33269	0.33269	0.33269	0.33269	0.33269	0.33269	0.33269	0.33269	0.33269	0.33269	0.33269	0.33269	0.33269	0.33269	0.33269	0.33269	0.33269	0.33269	0.33269	0.33269	0.33269	0.33269	0.33269	0.33269	0.33269	0.33269	0.33269	0.33269	0.33269	0.33269	0.33269	0.33269	0.33269	0.33269	0.33269	0.33269	0.33269	0.33269	0.33269	0.33269
59	0.33197	0.33197	0.33197	0.33197	0.33197	0.33197	0.33197	0.33197	0.33197	0.33197	0.33197	0.33197	0.33197	0.33197	0.33197	0.33197	0.33197	0.33197	0.33197	0.33197	0.33197	0.33197	0.33197	0.33197	0.33197	0.33197	0.33197	0.33197	0.33197	0.33197	0.33197	0.33197	0.33197	0.33197	0.33197	0.33197	0.33197	0.33197	0.33197	0.33197	0.33197	0.33197	0.33197	0.33197	0.33197	0.33197	0.33197	0.33197	0.33197
60	0.33123	0.33123	0.33123	0.33123	0.33123	0.33123	0.33123	0.33123	0.33123	0.33123	0.33123	0.33123	0.33123	0.33123	0.33123	0.33123	0.33123	0.33123	0.33123	0.33123	0.33123	0.33123	0.33123	0.33123	0.33123	0.33123	0.33123	0.33123	0.33123	0.33123	0.33123	0.33123	0.33123	0.33123	0.33123	0.33123	0.33123	0.33123	0.33123	0.33123	0.33123	0.33123	0.33123	0.33123	0.33123	0.33123	0.33123	0.33123	0.33123
61	0.33049	0.33049	0.33049	0.33049	0.33049	0.33049	0.33049	0.33049	0.33049	0.33049	0.33049	0.33049	0.33049	0.33049	0.33049	0.33049	0.33049	0.33049	0.33049	0.33049	0.33049	0.33049	0.33049	0.33049	0.33049	0.33049	0.33049	0.33049	0.33049	0.33049	0.33049	0.33049	0.33049	0.33049	0.33049	0.33049	0.33049	0.33049	0.33049	0.33049	0.33049	0.33049	0.33049	0.33049	0.33049	0.33049	0.33049	0.33049	0.33049
62	0.32975	0.32975	0.32975	0.32975	0.32975	0.32975	0.32975	0.32975	0.32975	0.32975	0.32975	0.32975	0.32975	0.32975	0.32975	0.32975	0.32975	0.32975	0.32975	0.32975	0.32975	0.32975	0.32975	0.32975	0.32975	0.32975	0.32975	0.32975	0.32975	0.32975	0.32975	0.32975	0.32975	0.32975	0.32975	0.32975	0.32975	0.32975	0.32975	0.32975	0.32975	0.32975	0.32975	0.32975	0.32975	0.32975	0.32975	0.32975	0.32975
63	0.32901	0.32901	0.32901	0.32901	0.32901	0.32901	0.32901	0.32901	0.32901	0.32901	0.32901	0.32901	0.32901	0.32901	0.32901	0.32901	0.32901	0.32901	0.32901	0.32901	0.32901	0.32901	0.32901	0.32901	0.32901	0.32901	0.32901	0.32901	0.32901	0.32901	0.32901	0.32901	0.32901	0.32901	0.32901	0.32901	0.32901	0.32901	0.32901	0.32901	0.32901	0.32901	0.32901	0.32901	0.32901	0.32901	0.32901	0.32901	0.32901
64	0.32829	0.32829	0.32829	0.32829	0.32829	0.32829	0.32829	0.32829	0.32829	0.32829	0.32829	0.32829	0.32829	0.32829	0.32829	0.32829	0.32829	0.32829	0.32829	0.32829	0.32829	0.32829	0.32829	0.32829	0.32829	0.32829	0.32829	0.32829	0.32829	0.32829	0.32829	0.32829	0.32829	0.32829	0.32829	0.32829	0.32829	0.32829	0.32829	0.32829	0.32829	0.32829	0.32829	0.32829	0.32829	0.32829	0.32829	0.32829	0.32829
65	0.3276	0.3276	0.3276	0.3276	0.3276	0.3276	0.3276	0.3276	0.3276	0.3276	0.3276	0.3276	0.3276	0.3276	0.3276	0.3276	0.3276	0.3276	0.3276	0.3276	0.3276	0.3276	0.3276	0.3276	0.3276	0.3276	0.3276	0.3276	0.3276	0.3276	0.3276	0.3276	0.3276	0.3276	0.3276	0.3276	0.3276	0.3276	0.3276	0.3276	0.3276	0.3276	0.3276	0.3276	0.3276	0.3276	0.3276	0.3276	0.3276
66	0.32693	0.32693	0.32693	0.32693	0.32693	0.32693	0.32693	0.32693	0.32693	0.32693	0.32693	0.32693	0.32693	0.32693	0.32693	0.32693	0.32693	0.32693	0.32693	0.32693	0.32693	0.32693	0.32693	0.32693	0.32693	0.32693	0.32693	0.32693	0.32693	0.32693	0.32693	0.32693	0.32693	0.32693	0.32693	0.32693	0.32693	0.32693	0.32693	0.32693	0.32693	0.32693	0.32693	0.32693	0.32693	0.32693	0.32693	0.32693	0.32693
67	0.32629	0.32629	0.32629	0.32629	0.32629	0.32629	0.32629	0.32629	0.32629	0.32629	0.32629	0.32629	0.32629	0.32629	0.32629	0.32629	0.32629	0.32629	0.32629	0.32629	0.32629	0.32629	0.32629	0.32629	0.32629	0.32629	0.32629	0.32629	0.32629	0.32629	0.32629	0.32629	0.32629	0.32629	0.32629	0.32629	0.32629	0.32629	0.32629	0.32629	0.32629	0.32629	0.32629	0.32629	0.32629	0.32629	0.32629	0.32629	0.32629
68	0.32569	0.32569	0.32569	0.32569	0.32569	0.32569	0.32569	0.32569	0.32569	0.32569	0.32569	0.32569	0.32569	0.32569	0.32569	0.32569	0.32569	0.32569	0.32569	0.32569	0.32569	0.32569	0.32569	0.32569	0.32569	0.32569	0.32569	0.32569	0.32569	0.32569	0.32569	0.32569	0.32569	0.32569	0.32569	0.32569	0.32569	0.32569	0.32569	0.32569	0.32569	0.32569	0.32569	0.32569	0.32569	0.32569	0.32569	0.32569	0.32569
69	0.32513	0.32513	0.32513	0.32513	0.32513	0.32513	0.32513	0.32513	0.32513	0.32513	0.32513	0.32513	0.32513	0.32513	0.32513	0.32513	0.32513	0.32513	0.32513	0.32513	0.32513	0.32513	0.32513	0.32513	0.32513	0.32513	0.32513	0.32513	0.32513	0.32513	0.32513	0.32513	0.32513	0.32513	0.32513	0.32513	0.32513	0.32513	0.32513	0.32513	0.32513	0.32513	0.32513	0.32513	0.32513	0.32513	0.32513	0.32513	0.32513
70	0.3246	0.3246	0.3246	0.3246	0.3246	0.3246	0.3246	0.3246	0.3246	0.3246	0.3246	0.3246	0.3246	0.3246	0.3246	0.3246	0.3246	0.3246	0.3246	0.3246	0.3246	0.3246	0.3246	0.3246	0.3246	0.3246	0.3246	0.3246	0.3246	0.3246	0.3246	0.3246	0.3246	0.3246	0.3246	0.3246	0.3246	0.3246	0.3246	0.3246	0.3246	0.3246	0.3246	0.3246	0.3246	0.3246	0.3246	0.3246	0.3246
71	0.32413	0.32413	0.32413	0.32413	0.32413	0.32413	0.32413	0.32413	0.32413	0.32413	0.32413	0.32413	0.32413	0.32413	0.32413	0.32413	0.32413	0.32413	0.32413	0.32413	0.32413	0.32413	0.32413	0.32413	0.32413	0.32413	0.32413	0.32413	0.32413	0.32413	0.32413	0.32413	0.32413	0.32413	0.32413	0.32413	0.32413	0.32413	0.32413	0.32413	0.32413	0.32413	0.32413	0.32413	0.32413	0.32413	0.32413	0.32413	0.32413
72	0.3237	0.3237	0.3237	0.3237	0.3237	0.3237	0.3237	0.3237	0.3237	0.3237	0.3237	0.3237	0.3237	0.3237	0.3237	0.3237	0.3237	0.3237	0.3237	0.3237	0.3237	0.3237	0.3237	0.3237	0.3237	0.3237	0.3237	0.3237	0.3237	0.3237	0.3237	0.3237	0.3237	0.3237	0.3237	0.3237	0.3237	0.3237	0.3237	0.3237	0.3237	0.3237	0.3237	0.3237	0.3237	0.3237	0.3237	0.3237	0.3237
73	0.32331	0.32331	0.32331	0.32331	0.32331	0.32331	0.32331	0.32331	0.32331	0.32331	0.32331	0.32331	0.32331	0.32331	0.32331	0.32331	0.32331	0.32331	0.32331	0.32331	0.32331	0.32331	0.32331	0.32331	0.32331	0.32331	0.32331	0.32331	0.32331	0.32331	0.32331	0.32331	0.32331	0.32331	0.32331	0.32331	0.32331	0.32331	0.32331	0.32331	0.32331	0.32331	0.32331	0.32331	0.32331	0.32331	0.32331	0.32331	0.32331
74	0.32297	0.32297	0.32297	0.32297	0.32297	0.32297	0.32297	0.32297	0.32297	0.32297	0.32297	0.32297	0.32297	0.32297	0.32297	0.32297	0.32297	0.32297	0.32297	0.32297	0.32297	0.32297	0.32297	0.32297	0.32297	0.32297	0.32297	0.32297	0.32297	0.32297	0.32297	0.32297	0.32297	0.32297	0.32297	0.32297	0.32297	0.32297	0.32297	0.32297	0.32297	0.32297	0.32297	0.32297	0.32297	0.32297	0.32297	0.32297	0.32297
75	0.32268	0.32268	0.32268	0.32268	0.32268	0.32268	0.32268	0.32268	0.32268	0.32268	0.32268	0.32268	0.32268	0.32268	0.32268	0.32268	0.32268	0.32268	0.32268	0.32268	0.32268	0.32268	0.32268	0.32268	0.32268	0.32268	0.32268	0.32268	0.32268	0.32268	0.32268	0.32268	0.32268	0.32268	0.32268	0.32268	0.32268	0.32268	0.32268	0.32268	0.32268	0.32268	0.32268	0.32268	0.32268	0.32268	0.32268	0.32268	0.32268
76	0.32242	0.32242	0.32242	0.32242	0.32242	0.32242	0.32242	0.32242	0.32242	0.32242	0.32242	0.32242	0.32242	0.32242	0.32242	0.32242	0.32242	0.32242	0.32242	0.32242	0.32242	0.32242	0.32242	0.32242	0.32242	0.32242	0.32242	0.32242	0.32242	0.32242	0.32242	0.32242	0.32242	0.32242	0.32242	0.32242	0.32242	0.32242	0.32242	0.32242	0.32242	0.32242	0.32242	0.32242	0.32242	0.32242	0.32242	0.32242	0.32242
77	0.32221	0.32221	0.32221	0.32221	0.32221	0.32221	0.32221	0.32221	0.32221	0.32221	0.32221	0.32221	0.32221	0.32221	0.32221	0.32221	0.32221	0.32221	0.32221	0.32221	0.32221	0.32221	0.32221	0.32221	0.32221	0.32221	0.32221	0.32221	0.32221	0.32221	0.32221	0.32221	0.32221	0.32221	0.32221	0.32221	0.32221	0.32221	0.32221	0.32221	0.32221	0.32221	0.32221	0.32221	0.32221	0.32221	0.32221	0.32221	0.32221
78	0.32205	0.32205	0.32205	0.32205	0.32205	0.32205	0.32205	0.32205	0.32205	0.32205	0.32205	0.32205	0.32205	0.32205	0.32205	0.32205	0.32205	0.32205	0.32205	0.32205	0.32205	0.32205	0.32205	0.32205	0.32205	0.32205	0.32205	0.32205	0.32205	0.32205	0.32205	0.32205	0.32205	0.32205	0.32205	0.32205	0.32205	0.32205	0.32205	0.32205	0.32205	0.32205	0.32205	0.32205	0.32205	0.32205	0.32205	0.32205	0.32205
79	0.32192	0.32192	0.32192	0.32192	0.32192	0.32192	0.32192	0.32192	0.32192	0.32192	0.32192	0.32192	0.32192	0.32192	0.32192	0.32192	0.32192	0.32192	0.32192	0.32192	0.32192	0.32192	0.32192	0.32192	0.32192	0.32192	0.32192	0.32192	0.32192	0.32192	0.32192	0.32192	0.32192	0.32192	0.32192	0.32192	0.32192	0.32192	0.32192	0.32192	0.32192	0.32192	0.32192	0.32192	0.32192	0.32192	0.32192	0.32192	0.32192
80	0.32183	0.32183	0.32183	0.32183	0.32183	0.32183	0.32183	0.32183	0.32183	0.32183	0.32183	0.32183	0.32183	0.32183	0.32183	0.32183	0.32183	0.32183	0.32183	0.32183	0.32183	0.32183	0.32183	0.32183	0.32183	0.32183	0.32183	0.32183	0.32183	0.32183	0.32183	0.32183	0.32183	0.32183	0.32183	0.32183	0.32183	0.32183	0.32183	0.32183	0.32183	0.32183	0.32183	0.32183	0.32183	0.32183	0.32183	0.32183	0.32183
81	0.32178	0.32178	0.32178	0.32178	0.32178	0.32178	0.32178	0.32178	0.32178	0.32178	0.32178	0.32178	0.32178	0.32178	0.32178	0.32178	0.32178	0.32178	0.32178	0.32178	0.32178	0.32178	0.32178	0.32178	0.32178	0.32178	0.32178	0.32178	0.32178	0.32178	0.32178	0.32178	0.32178	0.32178	0.32178	0.32178	0.32178	0.32178	0.32178	0.32178	0.32178	0.32178	0.32178	0.32178	0.32178	0.32178	0.32178	0.32178	0.32178
82	0.32175	0.32175	0.32175	0.32175	0.32175	0.32175	0.32175	0.32175	0.32175	0.32175	0.32175	0.32175	0.32175	0.32175	0.32175	0.32175	0.32175	0.32175	0.32175	0.32175	0.32175	0.32175	0.32175	0.32175	0.32175	0.32175	0.32175	0.32175	0.32175	0.32175	0.32175	0.32175	0.32175	0.32175	0.32175	0.32175	0.32175	0.32175	0.32175	0.32175	0.32175	0.32175	0.32175	0.32175	0.32175	0.32175	0.32175	0.32175	0.32175
83	0.32175	0.32175	0.32175	0.32175	0.32175	0.32175	0.32175	0.32175	0.32175	0.32175	0.32175	0.32175	0.32175	0.32175	0.32175	0.32175	0.32175	0.32175	0.32175	0.32175	0.32175	0.32175	0.32175	0.32175	0.32175	0.32175	0.32175	0.32175	0.32175	0.32175	0.32175	0.32175	0.32175	0.32175	0.32175	0.32175	0.32175	0.32175	0.32175	0.32175	0.32175	0.32175	0.32175	0.32175	0.32175	0.32175	0.32175	0.32175	0.32175
84	0.32179	0.32179	0.32179	0.32179	0.32179	0.32179	0.32179	0.32179	0.32179	0.32179	0.32179	0.32179	0.32179	0.32179	0.32179	0.32179	0.32179	0.32179	0.32179	0.32179	0.32179	0.32179	0.32179	0.32179	0.32179	0.32179	0.32179	0.32179	0.32179	0.32179	0.32179	0.32179	0.32179	0.32179	0.32179	0.32179	0.32179	0.32179	0.32179	0.32179	0.32179	0.32179	0.32179	0.32179	0.32179	0.32179	0.32179	0.32179	0.32179
85	0.32185	0.32185	0.32185	0.32185	0.32185	0.32185	0.32185	0.32185	0.32185	0.32185	0.32185	0.32185	0.32185	0.32185	0.32185	0.32185	0.32185	0.32185	0.32185	0.32185	0.32185	0.32185	0.32185	0.32185	0.32185	0.32185	0.32185	0.32185	0.32185	0.32185	0.32185	0.32185	0.32185	0.32185	0.32185	0.32185	0.32185	0.32185	0.32185	0.32185	0.32185	0.32185	0.32185	0.32185	0.32185	0.32185	0.32185	0.32185	0.32185
86	0.32193	0.32193	0.32193	0.32193	0.32193	0.32193	0.32193	0.32193	0.32193	0.32193	0.32193	0.32193	0.32193	0.32193	0.32193	0.32193	0.32193	0.32193	0.32193	0.32193	0.32193	0.32193	0.32193	0.32193	0.32193	0.32193	0.32193	0.32193	0.32193	0.32193	0.32193	0.32193	0.32193	0.32193	0.32193	0.32193	0.32193	0.32193	0.32193	0.32193	0.32193	0.32193	0.32193	0.32193	0.32193	0.32193	0.32193	0.32193	0.32193
87	0.32202	0.32202	0.32202	0.32202	0.32202	0.32202	0.32202	0.32202	0.32202	0.32202	0.32202	0.32202	0.32202	0.32202	0.32202	0.32202	0.32202	0.32202	0.32202	0.32202	0.32202	0.32202	0.32202	0.32202	0.32202	0.32202	0.32202	0.32202	0.32202	0.32202	0.32202	0.32202	0.32202	0.32202	0.32202	0.32202	0.32202	0.32202	0.32202	0.32202	0.32202	0.32202	0.32202	0.32202	0.32202	0.32202	0.32202	0.32202	0.32202
88	0.32213	0.32213	0.32213	0.32213	0.32213	0.32213	0.32213	0.32213	0.32213	0.32213	0.32213	0.32213	0.32213	0.32213	0.32213	0.32213	0.32213	0.32213	0.32213	0.32213	0.32213	0.32213	0.32213	0.32213	0.32213	0.32213	0.32213	0.32213	0.32213	0.32213	0.32213	0.32213	0.32213	0.32213	0.32213	0.32213	0.32213	0.32213	0.32213	0.32213	0.32213	0.32213	0.32213	0.32213	0.32213	0.32213	0.32213	0.32213	0.32213
89	0.32225	0.32225	0.32225	0.32225	0.32225	0.32225	0.32225	0.32225	0.32225	0.32225	0.32225	0.32225	0.32225	0.32225	0.32225	0.32225	0.32225	0.32225	0.32225	0.32225	0.32225	0.32225	0.32225	0.32225	0.32225	0.32225	0.32225	0.32225	0.32225	0.32225	0.32225	0.32225	0.32225	0.32225	0.32225	0.32225	0.32225	0.32225	0.32225	0.32225	0.32225	0.32225	0.32225	0.32225	0.32225	0.32225	0.32225	0.32225	0.32225
90	0.32239	0.32239	0.32239	0.32239	0.32239	0.32239	0.32239	0.32239	0.32239	0.32239	0.32239	0.32239	0.32239	0.32239	0.32239	0.32239	0.32239	0.32239	0.32239	0.32239	0.32239	0.32239	0.32239	0.32239	0.32239	0.32239	0.32239	0.32239	0.32239	0.32239	0.32239	0.32239	0.32239	0.32239	0.32239	0.32239	0.32239	0.32239	0.32239	0.32239	0.32239	0.32239	0.32239	0.32239	0.32239	0.32239	0.32239	0.32239	0.32239
91	0.32253	0.32253	0.32253	0.32253	0.32253	0.32253	0.32253	0.32253	0.32253	0.32253	0.32253	0.32253	0.32253	0.32253	0.32253	0.32253	0.32253	0.32253	0.32253	0.32253	0.32253	0.32253	0.32253	0.32253	0.32253	0.32253	0.32253	0.32253	0.32253	0.32253	0.32253	0.32253	0.32253	0.32253	0.32253	0.32253	0.32253	0.32253	0.32253	0.32253	0.32253	0.32253	0.32253	0.32253	0.32253	0.32253	0.32253	0.32253	0.32253
92	0.32269	0.32269	0.32269	0.32269	0.32269	0.32269	0.32269	0.32269	0.32269	0.32269	0.32269	0.32269	0.32269	0.32269	0.32269	0.32269	0.32269	0.32269	0.32269	0.32269	0.32269	0.32269	0.32269	0.32269	0.32269	0.32269	0.32269	0.32269	0.32269	0.32269	0.32269	0.32269	0.32269	0.32269	0.32269	0.32269	0.32269	0.32269	0.32269	0.32269	0.32269	0.32269	0.32269	0.32269	0.32269	0.32269	0.32269	0.32269	0.32269
93	0.32284	0.32284	0.32284	0.32284	0.32284	0.32284	0.32284	0.32284	0.32284	0.32284	0.32284	0.32284	0.32284	0.32284	0.32284	0.32284	0.32284	0.32284	0.32284	0.32284	0.32284	0.32284	0.32284	0.32284	0.32284	0.32284	0.32284	0.32284	0.32284	0.32284	0.32284	0.32284	0.32284	0.32284	0.32284	0.32284	0.32284	0.32284	0.32284	0.32284	0.32284	0.32284	0.32284	0.32284	0.32284	0.32284	0.32284	0.32284	0.32284
94	0.323	0.323	0.323	0.323	0.323	0.323	0.323	0.323	0.323	0.323	0.323	0.323	0.323	0.323	0.323	0.323	0.323	0.323	0.323	0.323	0.323	0.323	0.323	0.323	0.323	0.323	0.323	0.323	0.323	0.323	0.323	0.323	0.323	0.323	0.323	0.323	0.323	0.323	0.323	0.323	0.323	0.323	0.323	0.323	0.323	0.323	0.323	0.323	0.323
95	0.32316	0.32316	0.32316	0.32316	0.32316	0.32316	0.32316	0.32316	0.32316	0.32316	0.32316	0.32316	0.32316	0.32316	0.32316	0.32316	0.32316	0.32316	0.32316	0.32316	0.32316	0.32316	0.32316	0.32316	0.32316	0.32316	0.32316	0.32316	0.32316	0.32316	0.32316	0.32316	0.32316	0.32316	0.32316	0.32316	0.32316	0.32316	0.32316	0.32316	0.32316	0.32316	0.32316	0.32316	0.32316	0.32316	0.32316	0.32316	0.32316
96	0.32331	0.32331	0.32331	0.32331	0.32331	0.32331	0.32331	0.32331	0.32331	0.32331	0.32331	0.32331	0.32331	0.32331	0.32331	0.32331	0.32331	0.32331	0.32331	0.32331	0.32331	0.32331	0.32331	0.32331	0.32331	0.32331	0.32331	0.32331	0.32331	0.32331	0.32331	0.32331	0.32331	0.32331	0.32331	0.32331	0.32331	0.32331	0.32331	0.32331	0.32331	0.32331	0.32331	0.32331	0.32331	0.32331	0.32331	0.32331	0.32331
97	0.32347	0.32347	0.32347	0.32347	0.32347	0.32347	0.32347	0.32347	0.32347	0.32347	0.32347	0.32347	0.32347	0.32347	0.32347	0.32347	0.32347	0.32347	0.32347	0.32347	0.32347	0.32347	0.32347	0.32347	0.32347	0.32347	0.32347	0.32347	0.32347	0.32347	0.32347	0.32347	0.32347	0.32347	0.32347	0.32347	0.32347	0.32347	0.32347	0.32347	0.32347	0.32347	0.32347	0.32347	0.32347	0.32347	0.32347	0.32347	0.32347
98	0.32363	0.32363	0.32363	0.32363	0.32363	0.32363	0.32363	0.32363	0.32363	0.32363	0.32363	0.32363	0.32363	0.32363	0.32363	0.32363	0.32363	0.32363	0.32363	0.32363	0.32363	0.32363	0.32363	0.32363	0.32363	0.32363	0.32363	0.32363	0.32363	0.32363	0.32363	0.32363	0.32363	0.32363	0.32363	0.32363	0.32363	0.32363	0.32363	0.32363	0.32363	0.32363	0.32363	0.32363	0.32363	0.32363	0.32363	0.32363	0.32363
99	0.32377	0.32377	0.32377	0.32377	0.32377	0.32377	0.32377	0.32377	0.32377	0.32377	0.32377	0.32377	0.32377	0.32377	0.32377	0.32377	0.32377	0.32377	0.32377	0.32377	0.32377	0.32377	0.32377	0.32377	0.32377	0.32377	0.32377	0.32377	0.32377	0.32377	0.32377	0.32377	0.32377	0.32377	0.32377	0.32377	0.32377	0.32377	0.32377	0.32377	0.32377	0.32377	0.32377	0.32377	0.32377	0.32377	0.32377	0.32377	0.32377
100	0.32392	0.32392	0.32392	0.32392	0.32392	0.32392	0.32392	0.32392	0.32392	0.32392	0.32392	0.32392	0.32392	0.32392	0.32392	0.32392	0.32392	0.32392	0.32392	0.32392	0.32392	0.32392	0.32392	0.32392	0.32392	0.32392	0.32392	0.32392	0.32392	0.32392	0.32392	0.32392	0.32392	0.32392	0.32392	0.32392	0.32392	0.32392	0.32392	0.32392	0.32392	0.32392	0.32392	0.32392	0.32392	0.32392	0.32392	0.32392	0.32392
101	0.32405	0.32405	0.32405	0.32405	0.32405	0.32405	0.32405	0.32405	0.32405	0.32405	0.32405	0.32405	0.32405	0.32405	0.32405	0.32405	0.32405	0.32405	0.32405	0.32405	0.32405	0.32405	0.32405	0.32405	0.32405	0.32405	0.32405	0.32405	0.32405	0.32405	0.32405	0.32405	0.32405	0.32405	0.32405	0.32405	0.32405	0.32405	0.32405	0.32405	0.32405	0.32405	0.32405	0.32405	0.32405	0.32405	0.32405	0.32405	0.32405
102	0.32419	0.32419	0.32419	0.32419	0.32419	0.32419	0.32419	0.32419	0.32419	0.32419	0.32419	0.32419	0.32419	0.32419	0.32419	0.32419	0.32419	0.32419	0.32419	0.32419	0.32419	0.32419	0.32419	0.32419	0.32419	0.32419	0.32419	0.32419	0.32419	0.32419	0.32419	0.32419	0.32419	0.32419	0.32419	0.32419	0.32419	0.32419	0.32419	0.32419	0.32419	0.32419	0.32419	0.32419	0.32419	0.32419	0.32419	0.32419	0.32419
103	0.32431	0.32431	0.32431	0.32431	0.32431	0.32431	0.32431	0.32431	0.32431	0.32431	0.32431	0.32431	0.32431	0.32431	0.32431	0.32431	0.32431	0.32431	0.32431	0.32431	0.32431	0.32431	0.32431	0.32431	0.32431	0.32431	0.32431	0.32431	0.32431	0.32431	0.32431	0.32431	0.32431	0.32431	0.32431	0.32431	0.32431	0.32431	0.32431	0.32431	0.32431	0.32431	0.32431	0.32431	0.32431	0.32431	0.32431	0.32431	0.32431
104	0.32442	0.32442	0.32442	0.32442	0.32442	0.32442	0.32442	0.32442	0.32442	0.32442	0.32442	0.32442	0.32442	0.32442	0.32442	0.32442	0.32442	0.32442	0.32442	0.32442	0.32442	0.32442	0.32442	0.32442	0.32442	0.32442	0.32442	0.32442	0.32442	0.32442	0.32442	0.32442	0.32442	0.32442	0.32442	0.32442	0.32442	0.32442	0.32442	0.32442	0.32442	0.32442	0.32442	0.32442	0.32442	0.32442	0.32442	0.32442	0.32442
105	0.32453	0.32453	0.32453	0.32453	0.32453	0.32453	0.32453	0.32453	0.32453	0.32453	0.32453	0.32453	0.32453	0.32453	0.32453	0.32453	0.32453	0.32453	0.32453	0.32453	0.32453	0.32453	0.32453	0.32453	0.32453	0.32453	0.32453	0.32453	0.32453	0.32453	0.32453	0.32453	0.32453	0.32453	0.32453	0.32453	0.32453	0.32453	0.32453	0.32453	0.32453	0.32453	0.32453	0.32453	0.32453	0.32453	0.32453	0.32453	0.32453
106	0.32463	0.32463	0.32463	0.32463	0.32463	0.32463	0.32463	0.32463	0.32463	0.32463	0.32463	0.32463	0.32463	0.32463	0.32463	0.32463	0.32463	0.32463	0.32463	0.32463	0.32463	0.32463	0.32463	0.32463	0.32463	0.32463	0.32463	0.32463	0.32463	0.32463	0.32463	0.32463	0.32463	0.32463	0.32463	0.32463	0.32463	0.32463	0.32463	0.32463	0.32463	0.32463	0.32463	0.32463	0.32463	0.32463	0.32463	0.32463	0.32463
107	0.32472	0.32472	0.32472	0.32472	0.32472	0.32472	0.32472	0.32472	0.32472	0.32472	0.32472	0.32472	0.32472	0.32472	0.32472	0.32472	0.32472	0.32472	0.32472	0.32472	0.32472	0.32472	0.32472	0.32472	0.32472	0.32472	0.32472	0.32472	0.32472	0.32472	0.32472	0.32472	0.32472	0.32472	0.32472	0.32472	0.32472	0.32472	0.32472	0.32472	0.32472	0.32472	0.32472	0.32472	0.32472	0.32472	0.32472	0.32472	0.32472
108	0.3248	0.3248	0.3248	0.3248	0.3248	0.3248	0.3248	0.3248	0.3248	0.3248	0.3248	0.3248	0.3248	0.3248	0.3248	0.3248	0.3248	0.3248	0.3248	0.3248	0.3248	0.3248	0.3248	0.3248	0.3248	0.3248	0.3248	0.3248	0.3248	0.3248	0.3248	0.3248	0.3248	0.3248	0.3248	0.3248	0.3248	0.3248	0.3248	0.3248	0.3248	0.3248	0.3248	0.3248	0.3248	0.3248	0.3248	0.3248	0.3248
109	0.32487	0.32487	0.32487	0.32487	0.32487	0.32487	0.32487	0.32487	0.32487	0.32487	0.32487	0.32487	0.32487	0.32487	0.32487	0.32487	0.32487	0.32487	0.32487	0.32487	0.32487	0.32487	0.32487	0.32487	0.32487	0.32487	0.32487	0.32487	0.32487	0.32487	0.32487	0.32487	0.32487	0.32487	0.32487	0.32487	0.32487	0.32487	0.32487	0.32487	0.32487	0.32487	0.32487	0.32487	0.32487	0.32487	0.32487	0.32487	0.32487
110	0.32493	0.32493	0.32493	0.32493	0.32493	0.32493	0.32493	0.32493	0.32493	0.32493	0.32493	0.32493	0.32493	0.32493	0.32493	0.32493	0.32493	0.32493	0.32493	0.32493	0.32493	0.32493	0.32493	0.32493	0.32493	0.32493	0.32493	0.32493	0.32493	0.32493	0.32493	0.32493	0.32493	0.32493	0.32493	0.32493	0.32493	0.32493	0.32493	0.32493	0.32493	0.32493	0.32493	0.32493	0.32493	0.32493	0.32493	0.32493	0.32493
111	0.32498	0.32498	0.32498	0.32498	0.32498	0.32498	0.32498	0.32498	0.32498	0.32498	0.32498	0.32498	0.32498	0.32498	0.32498	0.32498	0.32498	0.32498	0.32498	0.32498	0.32498	0.32498	0.32498	0.32498	0.32498	0.32498	0.32498	0.32498	0.32498	0.32498	0.32498	0.32498	0.32498	0.32498	0.32498	0.32498	0.32498	0.32498	0.32498	0.32498	0.32498	0.32498	0.32498	0.32498	0.32498	0.32498	0.32498	0.32498	0.32498
112	0.32502	0.32502	0.32502	0.32502	0.32502	0.32502	0.32502	0.32502	0.32502	0.32502	0.32502	0.32502	0.32502	0.32502	0.32502	0.32502	0.32502	0.32502	0.32502	0.32502	0.32502	0.32502	0.32502	0.32502	0.32502	0.32502	0.32502	0.32502	0.32502	0.32502	0.32502	0.32502	0.32502	0.32502	0.32502	0.32502	0.32502	0.32502	0.32502	0.32502	0.32502	0.32502	0.32502	0.32502	0.32502	0.32502	0.32502	0.32502	0.32502
113	0.32506	0.32506	0.32506	0.32506	0.32506	0.32506	0.32506	0.32506	0.32506	0.32506	0.32506	0.32506	0.32506	0.32506	0.32506	0.32506	0.32506	0.32506	0.32506	0.32506	0.32506	0.32506	0.32506	0.32506	0.32506	0.32506	0.32506	0.32506	0.32506	0.32506	0.32506	0.32506	0.32506	0.32506	0.32506	0.32506	0.32506	0.32506	0.32506	0.32506	0.32506	0.32506	0.32506	0.32506	0.32506	0.32506	0.32506	0.32506	0.32506
114	0.32508	0.32508	0.32508	0.32508	0.32508	0.32508	0.32508	0.32508	0.32508	0.32508	0.32508	0.32508	0.32508	0.32508	0.32508	0.32508	0.32508	0.32508	0.32508	0.32508	0.32508	0.32508	0.32508	0.32508	0.32508	0.32508	0.32508	0.32508	0.32508	0.32508	0.32508	0.32508	0.32508	0.32508	0.32508	0.32508	0.32508	0.32508	0.32508	0.32508	0.32508	0.32508	0.32508	0.32508	0.32508	0.32508	0.32508	0.32508	0.32508
115	0.3251	0.3251	0.3251	0.3251	0.3251	0.3251	0.3251	0.3251	0.3251	0.3251	0.3251	0.3251	0.3251	0.3251	0.3251	0.3251	0.3251	0.3251	0.3251	0.3251	0.3251	0.3251	0.3251	0.3251	0.3251	0.3251	0.3251	0.3251	0.3251	0.3251	0.3251	0.3251	0.3251	0.3251	0.3251	0.3251	0.3251	0.3251	0.3251	0.3251	0.3251	0.3251	0.3251	0.3251	0.3251	0.3251	0.3251	0.3251	0.3251
116	0.32512	0.32512	0.32512	0.32512	0.32512	0.32512	0.32512	0.32512	0.32512	0.32512	0.32512	0.32512	0.32512	0.32512	0.32512	0.32512	0.32512	0.32512	0.32512	0.32512	0.32512	0.32512	0.32512	0.32512	0.32512	0.32512	0.32512	0.32512	0.32512	0.32512	0.32512	0.32512	0.32512	0.32512	0.32512	0.32512	0.32512	0.32512	0.32512	0.32512	0.32512	0.32512	0.32512	0.32512	0.32512	0.32512	0.32512	0.32512	0.32512
117	0.32512	0.32512	0.32512	0.32512	0.32512	0.32512	0.32512	0.32512	0.32512	0.32512	0.32512	0.32512	0.32512	0.32512	0.32512	0.32512	0.32512	0.32512	0.32512	0.32512	0.32512	0.32512	0.32512	0.32512	0.32512	0.32512	0.32512	0.32512	0.32512	0.32512	0.32512	0.32512	0.32512	0.32512	0.32512	0.32512	0.32512	0.32512	0.32512	0.32512	0.32512	0.32512	0.32512	0.32512	0.32512	0.32512	0.32512	0.32512	0.32512
118	0.32512	0.32512	0.32512	0.32512	0.32512	0.32512	0.32512	0.32512	0.32512	0.32512	0.32512	0.32512	0.32512	0.32512	0.32512	0.32512	0.32512	0.32512	0.32512	0.32512	0.32512	0.32512	0.32512	0.32512	0.32512	0.32512	0.32512	0.32512	0.32512	0.32512	0.32512	0.32512	0.32512	0.32512	0.32512	0.32512	0.32512	0.32512	0.32512	0.32512	0.32512	0.32512	0.32512	0.32512	0.32512	0.32512	0.32512	0.32512	0.32512
119	0.32511	0.32511	0.32511	0.32511	0.32511	0.32511	0.32511	0.32511	0.32511	0.32511	0.32511	0.32511	0.32511	0.32511	0.32511	0.32511	0.32511	0.32511	0.32511	0.32511	0.32511	0.32511	0.32511	0.32511	0.32511	0.32511	0.32511	0.32511	0.32511	0.32511	0.32511	0.32511	0.32511	0.32511	0.32511	0.32511	0.32511	0.32511	0.32511	0.32511	0.32511	0.32511	0.32511	0.32511	0.32511	0.32511	0.32511	0.32511	0.32511
120	0.3251	0.3251	0.3251	0.3251	0.3251	0.3251	0.3251	0.3251	0.3251	0.3251	0.3251	0.3251	0.3251	0.3251	0.3251	0.3251	0.3251	0.3251	0.3251	0.3251	0.3251	0.3251	0.3251	0.3251	0.3251	0.3251	0.3251	0.3251	0.3251	0.3251	0.3251	0.3251	0.3251	0.3251	0.3251	0.3251	0.3251	0.3251	0.3251	0.3251	0.3251	0.3251	0.3251	0.3251	0.3251	0.3251	0.3251	0.3251	0.3251
121	0.32508	0.32508	0.32508	0.32508	0.32508	0.32508	0.32508	0.32508	0.32508	0.32508	0.32508	0.32508	0.32508	0.32508	0.32508	0.32508	0.32508	0.32508	0.32508	0.32508	0.32508	0.32508	0.32508	0.32508	0.32508	0.32508	0.32508	0.32508	0.32508	0.32508	0.32508	0.32508	0.32508	0.32508	0.32508	0.32508	0.32508	0.32508	0.32508	0.32508	0.32508	0.32508	0.32508	0.32508	0.32508	0.32508	0.32508	0.32508	0.32508
122	0.32506	0.32506	0.32506	0.32506	0.32506	0.32506	0.32506	0.32506	0.32506	0.32506	0.32506	0.32506	0.32506	0.32506	0.32506	0.32506	0.32506	0.32506	0.32506	0.32506	0.32506	0.32506	0.32506	0.32506	0.32506	0.32506	0.32506	0.32506	0.32506	0.32506	0.32506	0.32506	0.32506	0.32506	0.32506	0.32506	0.32506	0.32506	0.32506	0.32506	0.32506	0.32506	0.32506	0.32506	0.32506	0.32506	0.32506	0.32506	0.32506
123	0.32504	0.32504	0.32504	0.32504	0.32504	0.32504	0.32504	0.32504	0.32504	0.32504	0.32504	0.32504	0.32504	0.32504	0.32504	0.32504	0.32504	0.32504	0.32504	0.32504	0.32504	0.32504	0.32504	0.32504	0.32504	0.32504	0.32504	0.32504	0.32504	0.32504	0.32504	0.32504	0.32504	0.32504	0.32504	0.32504	0.32504	0.32504	0.32504	0.32504	0.32504	0.32504	0.32504	0.32504	0.32504	0.32504	0.32504	0.32504	0.32504
124	0.32501	0.32501	0.32501	0.32501	0.32501	0.32501	0.32501	0.32501	0.32501	0.32501	0.32501	0.32501	0.32501	0.32501	0.32501	0.32501	0.32501	0.32501	0.32501	0.32501	0.32501	0.32501	0.32501	0.32501	0.32501	0.32501	0.32501	0.32501	0.32501	0.32501	0.32501	0.32501	0.32501	0.32501	0.32501	0.32501	0.32501	0.32501	0.32501	0.32501	0.32501	0.32501	0.32501	0.32501	0.32501	0.32501	0.32501	0.32501	0.32501
125	0.32498	0.32498	0.32498	0.32498	0.32498	0.32498	0.32498	0.32498	0.32498	0.32498	0.32498	0.32498	0.32498	0.32498	0.32498	0.32498	0.32498	0.32498	0.32498	0.32498	0.32498	0.32498	0.32498	0.32498	0.32498	0.32498	0.32498	0.32498	0.32498	0.32498	0.32498	0.32498	0.32498	0.32498	0.32498	0.32498	0.32498	0.32498	0.32498	0.32498	0.32498	0.32498	0.32498	0.32498	0.32498	0.32498	0.32498	0.32498	0.32498
126	0.32495	0.32495	0.32495	0.32495	0.32495	0.32495	0.32495	0.32495	0.32495	0.32495	0.32495	0.32495	0.32495	0.32495	0.32495	0.32495	0.32495	0.32495	0.32495	0.32495	0.32495	0.32495	0.32495	0.32495	0.32495	0.32495	0.32495	0.32495	0.32495	0.32495	0.32495	0.32495	0.32495	0.32495	0.32495	0.32495	0.32495	0.32495	0.32495	0.32495	0.32495	0.32495	0.32495	0.32495	0.32495	0.32495	0.32495	0.32495	0.32495
127	0.32492	0.32492	0.32492	0.32492	0.32492	0.32492	0.32492	0.32492	0.32492	0.32492	0.32492	0.32492	0.32492	0.32492	0.32492	0.32492	0.32492	0.32492	0.32492	0.32492	0.32492	0.32492	0.32492	0.32492	0.32492	0.32492	0.32492	0.32492	0.32492	0.32492	0.32492	0.32492	0.32492	0.32492	0.32492	0.32492	0.32492	0.32492	0.32492	0.32492	0.32492	0.32492	0.32492	0.32492	0.32492	0.32492	0.32492	0.32492	0.32492
128	0.32488	0.32488	0.32488	0.32488	0.32488	0.32488	0.32488	0.32488	0.32488	0.32488	0.32488	0.32488	0.32488	0.32488	0.32488	0.32488	0.32488	0.32488	0.32488	0.32488	0.32488	0.32488	0.32488	0.32488	0.32488	0.32488	0.32488	0.32488	0.32488	0.32488	0.32488	0.32488	0.32488	0.32488	0.32488	0.32488	0.32488	0.32488	0.32488	0.32488	0.32488	0.32488	0.32488	0.32488	0.32488	0.32488	0.32488	0.32488	0.32488
129	0.32485	0.32485	0.32485	0.32485	0.32485	0.32485	0.32485	0.32485	0.32485	0.32485	0.32485	0.32485	0.32485	0.32485	0.32485	0.32485	0.32485	0.32485	0.32485	0.32485	0.32485	0.32485	0.32485	0.32485	0.32485	0.32485	0.32485	0.32485	0.32485	0.32485	0.32485	0.32485	0.32485	0.32485	0.32485	0.32485	0.32485	0.32485	0.32485	0.32485	0.32485	0.32485	0.32485	0.32485	0.32485	0.32485	0.32485	0.32485	0.32485
130	0.32482	0.32482	0.32482	0.32482	0.32482	0.32482	0.32482	0.32482	0.32482	0.32482	0.32482	0.32482	0.32482	0.32482	0.32482	0.32482	0.32482	0.32482	0.32482	0.32482	0.32482	0.32482	0.32482	0.32482	0.32482	0.32482	0.32482	0.32482	0.32482	0.32482	0.32482	0.32482	0.32482	0.32482	0.32482	0.32482	0.32482	0.32482	0.32482	0.32482	0.32482	0.32482	0.32482	0.32482	0.32482	0.32482	0.32482	0.32482	0.32482
131	0.32479	0.32479	0.32479	0.32479	0.32479	0.32479	0.32479	0.32479	0.32479	0.32479	0.32479	0.32479	0.32479	0.32479	0.32479	0.32479	0.32479	0.32479	0.32479	0.32479	0.32479	0.32479	0.32479	0.32479	0.32479	0.32479	0.32479	0.32479	0.32479	0.32479	0.32479	0.32479	0.32479	0.32479	0.32479	0.32479	0.32479	0.32479	0.32479	0.32479	0.32479	0.32479	0.32479	0.32479	0.32479	0.32479	0.32479	0.32479	0.32479
132	0.32476	0.32476	0.32476	0.32476	0.32476	0.32476	0.32476	0.32476	0.32476	0.32476	0.32476	0.32476	0.32476	0.32476	0.32476	0.32476	0.32476	0.32476	0.32476	0.32476	0.32476	0.32476	0.32476	0.32476	0.32476	0.32476	0.32476	0.32476	0.32476	0.32476	0.32476	0.32476	0.32476	0.32476	0.32476	0.32476	0.32476	0.32476	0.32476	0.32476	0.32476	0.32476	0.32476	0.32476	0.32476	0.32476	0.32476	0.32476	0.32476
133	0.32472	0.32472	0.32472	0.32472	0.32472	0.32472	0.32472	0.32472	0.32472	0.32472	0.32472	0.32472	0.32472	0.32472	0.32472	0.32472	0.32472	0.32472	0.32472	0.32472	0.32472	0.32472	0.32472	0.32472	0.32472	0.32472	0.32472	0.32472	0.32472	0.32472	0.32472	0.32472	0.32472	0.32472	0.32472	0.32472	0.32472	0.32472	0.32472	0.32472	0.32472	0.32472	0.32472	0.32472	0.32472	0.32472	0.32472	0.32472	0.32472
134	0.32469	0.32469	0.32469	0.32469	0.32469	0.32469	0.32469	0.32469	0.32469	0.32469	0.32469	0.32469	0.32469	0.32469	0.32469	0.32469	0.32469	0.32469	0.32469	0.32469	0.32469	0.32469	0.32469	0.32469	0.32469	0.32469	0.32469	0.32469	0.32469	0.32469	0.32469	0.32469	0.32469	0.32469	0.32469	0.32469	0.32469	0.32469	0.32469	0.32469	0.32469	0.32469	0.32469	0.32469	0.32469	0.32469	0.32469	0.32469	0.32469
135	0.32467	0.32467	0.32467	0.32467	0.32467	0.32467	0.32467	0.32467	0.32467	0.32467	0.32467	0.32467	0.32467	0.32467	0.32467	0.32467	0.32467	0.32467	0.32467	0.32467	0.32467	0.32467	0.32467	0.32467	0.32467	0.32467	0.32467	0.32467	0.32467	0.32467	0.32467	0.32467	0.32467	0.32467	0.32467	0.32467	0.32467	0.32467	0.32467	0.32467	0.32467	0.32467	0.32467	0.32467	0.32467	0.32467	0.32467	0.32467	0.32467
136	0.32464	0.32464	0.32464	0.32464	0.32464	0.32464	0.32464	0.32464	0.32464	0.32464	0.32464	0.32464	0.32464	0.32464	0.32464	0.32464	0.32464	0.32464	0.32464	0.32464	0.32464	0.32464	0.32464	0.32464	0.32464	0.32464	0.32464	0.32464	0.32464	0.32464	0.32464	0.32464	0.32464	0.32464	0.32464	0.32464	0.32464	0.32464	0.32464	0.32464	0.32464	0.32464	0.32464	0.32464	0.32464	0.32464	0.32464	0.32464	0.32464
137	0.32462	0.32462	0.32462	0.32462	0.32462	0.32462	0.32462	0.32462	0.32462	0.32462	0.32462	0.32462	0.32462	0.32462	0.32462	0.32462	0.32462	0.32462	0.32462	0.32462	0.32462	0.32462	0.32462	0.32462	0.32462	0.32462	0.32462	0.32462	0.32462	0.32462	0.32462	0.32462	0.32462	0.32462	0.32462	0.32462	0.32462	0.32462	0.32462	0.32462	0.32462	0.32462	0.32462	0.32462	0.32462	0.32462	0.32462	0.32462	0.32462
138	0.3246	0.3246	0.3246	0.3246	0.3246	0.3246	0.3246	0.3246	0.3246	0.3246	0.3246	0.3246	0.3246	0.3246	0.3246	0.3246	0.3246	0.3246	0.3246	0.3246	0.3246	0.3246	0.3246	0.3246	0.3246	0.3246	0.3246	0.3246	0.3246	0.3246	0.3246	0.3246	0.3246	0.3246	0.3246	0.3246	0.3246	0.3246	0.3246	0.3246	0.3246	0.3246	0.3246	0.3246	0.3246	0.3246	0.3246	0.3246	0.3246
139	0.32458	0.32458	0.32458	0.32458	0.32458	0.32458	0.32458	0.32458	0.32458	0.32458	0.32458	0.32458	0.32458	0.32458	0.32458	0.32458	0.32458	0.32458	0.32458	0.32458	0.32458	0.32458	0.32458	0.32458	0.32458	0.32458	0.32458	0.32458	0.32458	0.32458	0.32458	0.32458	0.32458	0.32458	0.32458	0.32458	0.32458	0.32458	0.32458	0.32458	0.32458	0.32458	0.32458	0.32458	0.32458	0.32458	0.32458	0.32458	0.32458
140	0.32456	0.32456	0.32456	0.32456	0.32456	0.32456	0.32456	0.32456	0.32456	0.32456	0.32456	0.32456	0.32456	0.32456	0.32456	0.32456	0.32456	0.32456	0.32456	0.32456	0.32456	0.32456	0.32456	0.32456	0.32456	0.32456	0.32456	0.32456	0.32456	0.32456	0.32456	0.32456	0.32456	0.32456	0.32456	0.32456	0.32456	0.32456	0.32456	0.32456	0.32456	0.32456	0.32456	0.32456	0.32456	0.32456	0.32456	0.32456	0.32456
141	0.32454	0.32454	0.32454	0.32454	0.32454	0.32454	0.32454	0.32454	0.32454	0.32454	0.32454	0.32454	0.32454	0.32454	0.32454	0.32454	0.32454	0.32454	0.32454	0.32454	0.32454	0.32454	0.32454	0.32454	0.32454	0.32454	0.32454	0.32454	0.32454	0.32454	0.32454	0.32454	0.32454	0.32454	0.32454	0.32454	0.32454	0.32454	0.32454	0.32454	0.32454	0.32454	0.32454	0.32454	0.32454	0.32454	0.32454	0.32454	0.32454
142	0.32453	0.32453	0.32453	0.32453	0.32453	0.32453	0.32453	0.32453	0.32453	0.32453	0.32453	0.32453	0.32453	0.32453	0.32453	0.32453	0.32453	0.32453	0.32453	0.32453	0.32453	0.32453	0.32453	0.32453	0.32453	0.32453	0.32453	0.32453	0.32453	0.32453	0.32453	0.32453	0.32453	0.32453	0.32453	0.32453	0.32453	0.32453	0.32453	0.32453	0.32453	0.32453	0.32453	0.32453	0.32453	0.32453	0.32453	0.32453	0.32453
143	0.32451	0.32451	0.32451	0.32451	0.32451	0.32451	0.32451	0.32451	0.32451	0.32451	0.32451	0.32451	0.32451	0.32451	0.32451	0.32451	0.32451	0.32451	0.32451	0.32451	0.32451	0.32451	0.32451	0.32451	0.32451	0.32451	0.32451	0.32451	0.32451	0.32451	0.32451	0.32451	0.32451	0.32451	0.32451	0.32451	0.32451	0.32451	0.32451	0.32451	0.32451	0.32451	0.32451	0.32451	0.32451	0.32451	0.32451	0.32451	0.32451
144	0.3245	0.3245	0.3245	0.3245	0.3245	0.3245	0.3245	0.3245	0.3245	0.3245	0.3245	0.3245	0.3245	0.3245	0.3245	0.3245	0.3245	0.3245	0.3245	0.3245	0.3245	0.3245	0.3245	0.3245	0.3245	0.3245	0.3245	0.3245	0.3245	0.3245	0.3245	0.3245	0.3245	0.3245	0.3245	0.3245	0.3245	0.3245	0.3245	0.3245	0.3245	0.3245	0.3245	0.3245	0.3245	0.3245	0.3245	0.3245	0.3245
145	0.3245	0.3245	0.3245	0.3245	0.3245	0.3245	0.3245	0.3245	0.3245	0.3245	0.3245	0.3245	0.3245	0.3245	0.3245	0.3245	0.3245	0.3245	0.3245	0.3245	0.3245	0.3245	0.3245	0.3245	0.3245	0.3245	0.3245	0.3245	0.3245	0.3245	0.3245	0.3245	0.3245	0.3245	0.3245	0.3245	0.3245	0.3245	0.3245	0.3245	0.3245	0.3245	0.3245	0.3245	0.3245	0.3245	0.3245	0.3245	0.3245
146	0.32449	0.32449	0.32449	0.32449	0.32449	0.32449	0.32449	0.32449	0.32449	0.32449	0.32449	0.32449	0.32449	0.32449	0.32449	0.32449	0.32449	0.32449	0.32449	0.32449	0.32449	0.32449	0.32449	0.32449	0.32449	0.32449	0.32449	0.32449	0.32449	0.32449	0.32449	0.32449	0.32449	0.32449	0.32449	0.32449	0.32449	0.32449	0.32449	0.32449	0.32449	0.32449	0.32449	0.32449	0.32449	0.32449	0.32449	0.32449	0.32449
147	0.32448	0.32448	0.32448	0.32448	0.32448	0.32448	0.32448	0.32448	0.32448	0.32448	0.32448	0.32448	0.32448	0.32448	0.32448	0.32448	0.32448	0.32448	0.32448	0.32448	0.32448	0.32448	0.32448	0.32448	0.32448	0.32448	0.32448	0.32448	0.32448	0.32448	0.32448	0.32448	0.32448	0.32448	0.32448	0.32448	0.32448	0.32448	0.32448	0.32448	0.32448	0.32448	0.32448	0.32448	0.32448	0.32448	0.32448	0.32448	0.32448
148	0.32448	0.32448	0.32448	0.32448	0.32448	0.32448	0.32448	0.32448	0.32448	0.32448	0.32448	0.32448	0.32448	0.32448	0.32448	0.32448	0.32448	0.32448	0.32448	0.32448	0.32448	0.32448	0.32448	0.32448	0.32448	0.32448	0.32448	0.32448	0.32448	0.32448	0.32448	0.32448	0.32448	0.32448	0.32448	0.32448	0.32448	0.32448	0.32448	0.32448	0.32448	0.32448	0.32448	0.32448	0.32448	0.32448	0.32448	0.32448	0.32448
149	0.32448	0.32448	0.32448	0.32448	0.32448	0.32448	0.32448	0.32448	0.32448	0.32448	0.32448	0.32448	0.32448	0.32448	0.32448	0.32448	0.32448	0.32448	0.32448	0.32448	0.32448	0.32448	0.32448	0.32448	0.32448	0.32448	0.32448	0.32448	0.32448	0.32448	0.32448	0.32448	0.32448	0.32448	0.32448	0.32448	0.32448	0.32448	0.32448	0.32448	0.32448	0.32448	0.32448	0.32448	0.32448	0.32448	0.32448	0.32448	0.32448
150	0.32448	0.32448	0.32448	0.32448	0.32448	0.32448	0.32448	0.32448	0.32448	0.32448	0.32448	0.32448	0.32448	0.32448	0.32448	0.32448	0.32448	0.32448	0.32448	0.32448	0.32448	0.32448	0.32448	0.32448	0.32448	0.32448	0.32448	0.32448	0.32448	0.32448	0.32448	0.32448	0.32448	0.32448	0.32448	0.32448	0.32448	0.32448	0.32448	0.32448	0.32448	0.32448	0.32448	0.32448	0.32448	0.32448	0.32448	0.32448	0.32448
151	0.32448	0.32448	0.32448	0.32448	0.32448	0.32448	0.32448	0.32448	0.32448	0.32448	0.32448	0.32448	0.32448	0.32448	0.32448	0.32448	0.32448	0.32448	0.32448	0.32448	0.32448	0.32448	0.32448	0.32448	0.32448	0.32448	0.32448	0.32448	0.32448	0.32448	0.32448	0.32448	0.32448	0.32448	0.32448	0.32448	0.32448	0.32448	0.32448	0.32448	0.32448	0.32448	0.32448	0.32448	0.32448	0.32448	0.32448	0.32448	0.32448
152	0.32449	0.32449	0.32449	0.32449	0.32449	0.32449	0.32449	0.32449	0.32449	0.32449	0.32449	0.32449	0.32449	0.32449	0.32449	0.32449	0.32449	0.32449	0.32449	0.32449	0.32449	0.32449	0.32449	0.32449	0.32449	0.32449	0.32449	0.32449	0.32449	0.32449	0.32449	0.32449	0.32449	0.32449	0.32449	0.32449	0.32449	0.32449	0.32449	0.32449	0.32449	0.32449	0.32449	0.32449	0.32449	0.32449	0.32449	0.32449	0.32449
153	0.32449	0.32449	0.32449	0.32449	0.32449	0.32449	0.32449	0.32449	0.32449	0.32449	0.32449	0.32449	0.32449	0.32449	0.32449	0.32449	0.32449	0.32449	0.32449	0.32449	0.32449	0.32449	0.32449	0.32449	0.32449	0.32449	0.32449	0.32449	0.32449	0.32449	0.32449	0.32449	0.32449	0.32449	0.32449	0.32449	0.32449	0.32449	0.32449	0.32449	0.32449	0.32449	0.32449	0.32449	0.32449	0.32449	0.32449	0.32449	0.32449
154	0.32449	0.32449	0.32449	0.32449	0.32449	0.32449	0.32449	0.32449	0.32449	0.32449	0.32449	0.32449	0.32449	0.32449	0.32449	0.32449	0.32449	0.32449	0.32449	0.32449	0.32449	0.32449	0.32449	0.32449	0.32449	0.32449	0.32449	0.32449	0.32449	0.32449	0.32449	0.32449	0.32449	0.32449	0.32449	0.32449	0.32449	0.32449	0.32449	0.32449	0.32449	0.32449	0.32449	0.32449	0.32449	0.32449	0.32449	0.32449	0.32449
155	0.3245	0.3245	0.3245	0.3245	0.3245	0.3245	0.3245	0.3245	0.3245	0.3245	0.3245	0.3245	0.3245	0.3245	0.3245	0.3245	0.3245	0.3245	0.3245	0.3245	0.3245	0.3245	0.3245	0.3245	0.3245	0.3245	0.3245	0.3245	0.3245	0.3245	0.3245	0.3245	0.3245	0.3245	0.3245	0.3245	0.3245	0.3245	0.3245	0.3245	0.3245	0.3245	0.3245	0.3245	0.3245	0.3245	0.3245	0.3245	0.3245
156	0.3245	0.3245	0.3245	0.3245	0.3245	0.3245	0.3245	0.3245	0.3245	0.3245	0.3245	0.3245	0.3245	0.3245	0.3245	0.3245	0.3245	0.3245	0.3245	0.3245	0.3245	0.3245	0.3245	0.3245	0.3245	0.3245	0.3245	0.3245	0.3245	0.3245	0.3245	0.3245	0.3245	0.3245	0.3245	0.3245	0.3245	0.3245	0.3245	0.3245	0.3245	0.3245	0.3245	0.3245	0.3245	0.3245	0.3245	0.3245	0.3245
157	0.32451	0.32451	0.32451	0.32451	0.32451	0.32451	0.32451	0.32451	0.32451	0.32451	0.32451	0.32451	0.32451	0.32451	0.32451	0.32451	0.32451	0.32451	0.32451	0.32451	0.32451	0.32451	0.32451	0.32451	0.32451	0.32451	0.32451	0.32451	0.32451	0.32451	0.32451	0.32451	0.32451	0.32451	0.32451	0.32451	0.32451	0.32451	0.32451	0.32451	0.32451	0.32451	0.32451	0.32451	0.32451	0.32451	0.32451	0.32451	0.32451
158	0.32452	0.32452	0.32452	0.32452	0.32452	0.32452	0.32452	0.32452	0.32452	0.32452	0.32452	0.32452	0.32452	0.32452	0.32452	0.32452	0.32452	0.32452	0.32452	0.32452	0.32452	0.32452	0.32452	0.32452	0.32452	0.32452	0.32452	0.32452	0.32452	0.32452	0.32452	0.32452	0.32452	0.32452	0.32452	0.32452	0.32452	0.32452	0.32452	0.32452	0.32452	0.32452	0.32452	0.32452	0.32452	0.32452	0.32452	0.32452	0.32452
159	0.32452	0.32452	0.32452	0.32452	0.32452	0.32452	0.32452	0.32452	0.32452	0.32452	0.32452	0.32452	0.32452	0.32452	0.32452	0.32452	0.32452	0.32452	0.32452	0.32452	0.32452	0.32452	0.32452	0.32452	0.32452	0.32452	0.32452	0.32452	0.32452	0.32452	0.32452	0.32452	0.32452	0.32452	0.32452	0.32452	0.32452	0.32452	0.32452	0.32452	0.32452	0.32452	0.32452	0.32452	0.32452	0.32452	0.32452	0.32452	0.32452
160	0.32453	0.32453	0.32453	0.32453	0.32453	0.32453	0.32453	0.32453	0.32453	0.32453	0.32453	0.32453	0.32453	0.32453	0.32453	0.32453	0.32453	0.32453	0.32453	0.32453	0.32453	0.32453	0.32453	0.32453	0.32453	0.32453	0.32453	0.32453	0.32453	0.32453	0.32453	0.32453	0.32453	0.32453	0.32453	0.32453	0.32453	0.32453	0.32453	0.32453	0.32453	0.32453	0.32453	0.32453	0.32453	0.32453	0.32453	0.32453	0.32453
161	0.32454	0.32454	0.32454	0.32454	0.32454	0.32454	0.32454	0.32454	0.32454	0.32454	0.32454	0.32454	0.32454	0.32454	0.32454	0.32454	0.32454	0.32454	0.32454	0.32454	0.32454	0.32454	0.32454	0.32454	0.32454	0.32454	0.32454	0.32454	0.32454	0.32454	0.32454	0.32454	0.32454	0.32454	0.32454	0.32454	0.32454	0.32454	0.32454	0.32454	0.32454	0.32454	0.32454	0.32454	0.32454	0.32454	0.32454	0.32454	0.32454
162	0.32454	0.32454	0.32454	0.32454	0.32454	0.32454	0.32454	0.32454	0.32454	0.32454	0.32454	0.32454	0.32454	0.32454	0.32454	0.32454	0.32454	0.32454	0.32454	0.32454	0.32454	0.32454	0.32454	0.32454	0.32454	0.32454	0.32454	0.32454	0.32454	0.32454	0.32454	0.32454	0.32454	0.32454	0.32454	0.32454	0.32454	0.32454	0.32454	0.32454	0.32454	0.32454	0.32454	0.32454	0.32454	0.32454	0.32454	0.32454	0.32454
163	0.32455	0.32455	0.32455	0.32455	0.32455	0.32455	0.32455	0.32455	0.32455	0.32455	0.32455	0.32455	0.32455	0.32455	0.32455	0.32455	0.32455	0.32455	0.32455	0.32455	0.32455	0.32455	0.32455	0.32455	0.32455	0.32455	0.32455	0.32455	0.32455	0.32455	0.32455	0.32455	0.32455	0.32455	0.32455	0.32455	0.32455	0.32455	0.32455	0.32455	0.32455	0.32455	0.32455	0.32455	0.32455	0.32455	0.32455	0.32455	0.32455
164	0.32455	0.32455	0.32455	0.32455	0.32455	0.32455	0.32455	0.32455	0.32455	0.32455	0.32455	0.32455	0.32455	0.32455	0.32455	0.32455	0.32455	0.32455	0.32455	0.32455	0.32455	0.32455	0.32455	0.32455	0.32455	0.32455	0.32455	0.32455	0.32455	0.32455	0.32455	0.32455	0.32455	0.32455	0.32455	0.32455	0.32455	0.32455	0.32455	0.32455	0.32455	0.32455	0.32455	0.32455	0.32455	0.32455	0.32455	0.32455	0.32455
165	0.32456	0.32456	0.32456	0.32456	0.32456	0.32456	0.32456	0.32456	0.32456	0.32456	0.32456	0.32456	0.32456	0.32456	0.32456	0.32456	0.32456	0.32456	0.32456	0.32456	0.32456	0.32456	0.32456	0.32456	0.32456	0.32456	0.32456	0.32456	0.32456	0.32456	0.32456	0.32456	0.32456	0.32456	0.32456	0.32456	0.32456	0.32456	0.32456	0.32456	0.32456	0.32456	0.32456	0.32456	0.32456	0.32456	0.32456	0.32456	0.32456
166	0.32456	0.32456	0.32456	0.32456	0.32456	0.32456	0.32456	0.32456	0.32456	0.32456	0.32456	0.32456	0.32456	0.32456	0.32456	0.32456	0.32456	0.32456	0.32456	0.32456	0.32456	0.32456	0.32456	0.32456	0.32456	0.32456	0.32456	0.32456	0.32456	0.32456	0.32456	0.32456	0.32456	0.32456	0.32456	0.32456	0.32456	0.32456	0.32456	0.32456	0.32456	0.32456	0.32456	0.32456	0.32456	0.32456	0.32456	0.32456	0.32456
167	0.32457	0.32457	0.32457	0.32457	0.32457	0.32457	0.32457	0.32457	0.32457	0.32457	0.32457	0.32457	0.32457	0.32457	0.32457	0.32457	0.32457	0.32457	0.32457	0.32457	0.32457	0.32457	0.32457	0.32457	0.32457	0.32457	0.32457	0.32457	0.32457	0.32457	0.32457	0.32457	0.32457	0.32457	0.32457	0.32457	0.32457	0.32457	0.32457	0.32457	0.32457	0.32457	0.32457	0.32457	0.32457	0.32457	0.32457	0.32457	0.32457
168	0.32457	0.32457	0.32457	0.32457	0.32457	0.32457	0.32457	0.32457	0.32457	0.32457	0.32457	0.32457	0.32457	0.32457	0.32457	0.32457	0.32457	0.32457	0.32457	0.32457	0.32457	0.32457	0.32457	0.32457	0.32457	0.32457	0.32457	0.32457	0.32457	0.32457	0.32457	0.32457	0.32457	0.32457	0.32457	0.32457	0.32457	0.32457	0.32457	0.32457	0.32457	0.32457	0.32457	0.32457	0.32457	0.32457	0.32457	0.32457	0.32457
169	0.32457	0.32457	0.32457	0.32457	0.32457	0.32457	0.32457	0.32457	0.32457	0.32457	0.32457	0.32457	0.32457	0.32457	0.32457	0.32457	0.32457	0.32457	0.32457	0.32457	0.32457	0.32457	0.32457	0.32457	0.32457	0.32457	0.32457	0.32457	0.32457	0.32457	0.32457	0.32457	0.32457	0.32457	0.32457	0.32457	0.32457	0.32457	0.32457	0.32457	0.32457	0.32457	0.32457	0.32457	0.32457	0.32457	0.32457	0.32457	0.32457
170	0.32458	0.32458	0.32458	0.32458	0.32458	0.32458	0.32458	0.32458	0.32458	0.32458	0.32458	0.32458	0.32458	0.32458	0.32458	0.32458	0.32458	0.32458	0.32458	0.32458	0.32458	0.32458	0.32458	0.32458	0.32458	0.32458	0.32458	0.32458	0.32458	0.32458	0.32458	0.32458	0.32458	0.32458	0.32458	0.32458	0.32458	0.32458	0.32458	0.32458	0.32458	0.32458	0.32458	0.32458	0.32458	0.32458	0.32458	0.32458	0.32458
171	0.32458	0.32458	0.32458	0.32458	0.32458	0.32458	0.32458	0.32458	0.32458	0.32458	0.32458	0.32458	0.32458	0.32458	0.32458	0.32458	0.32458	0.32458	0.32458	0.32458	0.32458	0.32458	0.32458	0.32458	0.32458	0.32458	0.32458	0.32458	0.32458	0.32458	0.32458	0.32458	0.32458	0.32458	0.32458	0.32458	0.32458	0.32458	0.32458	0.32458	0.32458	0.32458	0.32458	0.32458	0.32458	0.32458	0.32458	0.32458	0.32458
172	0.32458	0.32458	0.32458	0.32458	0.32458	0.32458	0.32458	0.32458	0.32458	0.32458	0.32458	0.32458	0.32458	0.32458	0.32458	0.32458	0.32458	0.32458	0.32458	0.32458	0.32458	0.32458	0.32458	0.32458	0.32458	0.32458	0.32458	0.32458	0.32458	0.32458	0.32458	0.32458	0.32458	0.32458	0.32458	0.32458	0.32458	0.32458	0.32458	0.32458	0.32458	0.32458	0.32458	0.32458	0.32458	0.32458	0.32458	0.32458	0.32458
173	0.32458	0.32458	0.32458	0.32458	0.32458	0.32458	0.32458	0.32458	0.32458	0.32458	0.32458	0.32458	0.32458	0.32458	0.32458	0.32458	0.32458	0.32458	0.32458	0.32458	0.32458	0.32458	0.32458	0.32458	0.32458	0.32458	0.32458	0.32458	0.32458	0.32458	0.32458	0.32458	0.32458	0.32458	0.32458	0.32458	0.32458	0.32458	0.32458	0.32458	0.32458	0.32458	0.32458	0.32458	0.32458	0.32458	0.32458	0.32458	0.32458
174	0.32458	0.32458	0.32458	0.32458	0.32458	0.32458	0.32458	0.32458	0.32458	0.32458	0.32458	0.32458	0.32458	0.32458	0.32458	0.32458	0.32458	0.32458	0.32458	0.32458	0.32458	0.32458	0.32458	0.32458	0.32458	0.32458	0.32458	0.32458	0.32458	0.32458	0.32458	0.32458	0.32458	0.32458	0.32458	0.32458	0.32458	0.32458	0.32458	0.32458	0.32458	0.32458	0.32458	0.32458	0.32458	0.32458	0.32458	0.32458	0.32458
175	0.32458	0.32458	0.32458	0.32458	0.32458	0.32458	0.32458	0.32458	0.32458	0.32458	0.32458	0.32458	0.32458	0.32458	0.32458	0.32458	0.32458	0.32458	0.32458	0.32458	0.32458	0.32458	0.32458	0.32458	0.32458	0.32458	0.32458	0.32458	0.32458	0.32458	0.32458	0.32458	0.32458	0.32458	0.32458	0.32458	0.32458	0.32458	0.32458	0.32458	0.32458	0.32458	0.32458	0.32458	0.32458	0.32458	0.32458	0.32458	0.32458
176	0.32458	0.32458	0.32458	0.32458	0.32458	0.32458	0.32458	0.32458	0.32458	0.32458	0.32458	0.32458	0.32458	0.32458	0.32458	0.32458	0.32458	0.32458	0.32458	0.32458	0.32458	0.32458	0.32458	0.32458	0.32458	0.32458	0.32458	0.32458	0.32458	0.32458	0.32458	0.32458	0.32458	0.32458	0.32458	0.32458	0.32458	0.32458	0.32458	0.32458	0.32458	0.32458	0.32458	0.32458	0.32458	0.32458	0.32458	0.32458	0.32458
177	0.32458	0.32458	0.32458	0.32458	0.32458	0.32458	0.32458	0.32458	0.32458	0.32458	0.32458	0.32458	0.32458	0.32458	0.32458	0.32458	0.32458	0.32458	0.32458	0.32458	0.32458	0.32458	0.32458	0.32458	0.32458	0.32458	0.32458	0.32458	0.32458	0.32458	0.32458	0.32458	0.32458	0.32458	0.32458	0.32458	0.32458	0.32458	0.32458	0.32458	0.32458	0.32458	0.32458	0.32458	0.32458	0.32458	0.32458	0.32458	0.32458
178	0.32458	0.32458	0.32458	0.32458	0.32458	0.32458	0.32458	0.32458	0.32458	0.32458	0.32458	0.32458	0.32458	0.32458	0.32458	0.32458	0.32458	0.32458	0.32458	0.32458	0.32458	0.32458	0.32458	0.32458	0.32458	0.32458	0.32458	0.32458	0.32458	0.32458	0.32458	0.32458	0.32458	0.32458	0.32458	0.32458	0.32458	0.32458	0.32458	0.32458	0.32458	0.32458	0.32458	0.32458	0.32458	0.32458	0.32458	0.32458	0.32458
179	0.32457	0.32457	0.32457	0.32457	0.32457	0.32457	0.32457	0.32457	0.32457	0.32457	0.32457	0.32457	0.32457	0.32457	0.32457	0.32457	0.32457	0.32457	0.32457	0.32457	0.32457	0.32457	0.32457	0.32457	0.32457	0.32457	0.32457	0.32457	0.32457	0.32457	0.32457	0.32457	0.32457	0.32457	0.32457	0.32457	0.32457	0.32457	0.32457	0.32457	0.32457	0.32457	0.32457	0.32457	0.32457	0.32457	0.32457	0.32457	0.32457
180	0.32457	0.32457	0.32457	0.32457	0.32457	0.32457	0.32457	0.32457	0.32457	0.32457	0.32457	0.32457	0.32457	0.32457	0.32457	0.32457	0.32457	0.32457	0.32457	0.32457	0.32457	0.32457	0.32457	0.32457	0.32457	0.32457	0.32457	0.32457	0.32457	0.32457	0.32457	0.32457	0.32457	0.32457	0.32457	0.32457	0.32457	0.32457	0.32457	0.32457	0.32457	0.32457	0.32457	0.32457	0.32457	0.32457	0.32457	0.32457	0.32457
181	0.32457	0.32457	0.32457	0.32457	0.32457	0.32457	0.32457	0.32457	0.32457	0.32457	0.32457	0.32457	0.32457	0.32457	0.32457	0.32457	0.32457	0.32457	0.32457	0.32457	0.32457	0.32457	0.32457	0.32457	0.32457	0.32457	0.32457	0.32457	0.32457	0.32457	0.32457	0.32457	0.32457	0.32457	0.32457	0.32457	0.32457	0.32457	0.32457	0.32457	0.32457	0.32457	0.32457	0.32457	0.32457	0.32457	0.32457	0.32457	0.32457
182	0.32457	0.32457	0.32457	0.32457	0.32457	0.32457	0.32457	0.32457	0.32457	0.32457	0.32457	0.32457	0.32457	0.32457	0.32457	0.32457	0.32457	0.32457	0.32457	0.32457	0.32457	0.32457	0.32457	0.32457	0.32457	0.32457	0.32457	0.32457	0.32457	0.32457	0.32457	0.32457	0.32457	0.32457	0.32457	0.32457	0.32457	0.32457	0.32457	0.32457	0.32457	0.32457	0.32457	0.32457	0.32457	0.32457	0.32457	0.32457	0.32457
183	0.32456	0.32456	0.32456	0.32456	0.32456	0.32456	0.32456	0.32456	0.32456	0.32456	0.32456	0.32456	0.32456	0.32456	0.32456	0.32456	0.32456	0.32456	0.32456	0.32456	0.32456	0.32456	0.32456	0.32456	0.32456	0.32456	0.32456	0.32456	0.32456	0.32456	0.32456	0.32456	0.32456	0.32456	0.32456	0.32456	0.32456	0.32456	0.32456	0.32456	0.32456	0.32456	0.32456	0.32456	0.32456	0.32456	0.32456	0.32456	0.32456
184	0.32456	0.32456	0.32456	0.32456	0.32456	0.32456	0.32456	0.32456	0.32456	0.32456	0.32456	0.32456	0.32456	0.32456	0.32456	0.32456	0.32456	0.32456	0.32456	0.32456	0.32456	0.32456	0.32456	0.32456	0.32456	0.32456	0.32456	0.32456	0.32456	0.32456	0.32456	0.32456	0.32456	0.32456	0.32456	0.32456	0.32456	0.32456	0.32456	0.32456	0.32456	0.32456	0.32456	0.32456	0.32456	0.32456	0.32456	0.32456	0.32456
185	0.32456	0.32456	0.32456	0.32456	0.32456	0.32456	0.32456	0.32456	0.32456	0.32456	0.32456	0.32456	0.32456	0.32456	0.32456	0.32456	0.32456	0.32456	0.32456	0.32456	0.32456	0.32456	0.32456	0.32456	0.32456	0.32456	0.32456	0.32456	0.32456	0.32456	0.32456	0.32456	0.32456	0.32456	0.32456	0.32456	0.32456	0.32456	0.32456	0.32456	0.32456	0.32456	0.32456	0.32456	0.32456	0.32456	0.32456	0.32456	0.32456
186	0.32455	0.32455	0.32455	0.32455	0.32455	0.32455	0.32455	0.32455	0.32455	0.32455	0.32455	0.32455	0.32455	0.32455	0.32455	0.32455	0.32455	0.32455	0.32455	0.32455	0.32455	0.32455	0.32455	0.32455	0.32455	0.32455	0.32455	0.32455	0.32455	0.32455	0.32455	0.32455	0.32455	0.32455	0.32455	0.32455	0.32455	0.32455	0.32455	0.32455	0.32455	0.32455	0.32455	0.32455	0.32455	0.32455	0.32455	0.32455	0.32455
187	0.32455	0.32455	0.32455	0.32455	0.32455	0.32455	0.32455	0.32455	0.32455	0.32455	0.32455	0.32455	0.32455	0.32455	0.32455	0.32455	0.32455	0.32455	0.32455	0.32455	0.32455	0.32455	0.32455	0.32455	0.32455	0.32455	0.32455	0.32455	0.32455	0.32455	0.32455	0.32455	0.32455	0.32455	0.32455	0.32455	0.32455	0.32455	0.32455	0.32455	0.32455	0.32455	0.32455	0.32455	0.32455	0.32455	0.32455	0.32455	0.32455
188	0.32455	0.32455	0.32455	0.32455	0.32455	0.32455	0.32455	0.32455	0.32455	0.32455	0.32455	0.32455	0.32455	0.32455	0.32455	0.32455	0.32455	0.32455	0.32455	0.32455	0.32455	0.32455	0.32455	0.32455	0.32455	0.32455	0.32455	0.32455	0.32455	0.32455	0.32455	0.32455	0.32455	0.32455	0.32455	0.32455	0.32455	0.32455	0.32455	0.32455	0.32455	0.32455	0.32455	0.32455	0.32455	0.32455	0.32455	0.32455	0.32455
189	0.32455	0.32455	0.32455	0.32455	0.32455	0.32455	0.32455	0.32455	0.32455	0.32455	0.32455	0.32455	0.32455	0.32455	0.32455	0.32455	0.32455	0.32455	0.32455	0.32455	0.32455	0.32455	0.32455	0.32455	0.32455	0.32455	0.32455	0.32455	0.32455	0.32455	0.32455	0.32455	0.32455	0.32455	0.32455	0.32455	0.32455	0.32455	0.32455	0.32455	0.32455	0.32455	0.32455	0.32455	0.32455	0.32455	0.32455	0.32455	0.32455
190	0.32454	0.32454	0.32454	0.32454	0.32454	0.32454	0.32454	0.32454	0.32454	0.32454	0.32454	0.32454	0.32454	0.32454	0.32454	0.32454	0.32454	0.32454	0.32454	0.32454	0.32454	0.32454	0.32454	0.32454	0.32454	0.32454	0.32454	0.32454	0.32454	0.32454	0.32454	0.32454	0.32454	0.32454	0.32454	0.32454	0.32454	0.32454	0.32454	0.32454	0.32454	0.32454	0.32454	0.32454	0.32454	0.32454	0.32454	0.32454	0.32454
191	0.32454	0.32454	0.32454	0.32454	0.32454	0.32454	0.32454	0.32454	0.32454	0.32454	0.32454	0.32454	0.32454	0.32454	0.32454	0.32454	0.32454	0.32454	0.32454	0.32454	0.32454	0.32454	0.32454	0.32454	0.32454	0.32454	0.32454	0.32454	0.32454	0.32454	0.32454	0.32454	0.32454	0.32454	0.32454	0.32454	0.32454	0.32454	0.32454	0.32454	0.32454	0.32454	0.32454	0.32454	0.32454	0.32454	0.32454	0.32454	0.32454
192	0.32454	0.32454	0.32454	0.32454	0.32454	0.32454	0.32454	0.32454	0.32454	0.32454	0.32454	0.32454	0.32454	0.32454	0.32454	0.32454	0.32454	0.32454	0.32454	0.32454	0.32454	0.32454	0.32454	0.32454	0.32454	0.32454	0.32454	0.32454	0.32454	0.32454	0.32454	0.32454	0.32454	0.32454	0.32454	0.32454	0.32454	0.32454	0.32454	0.32454	0.32454	0.32454	0.32454	0.32454	0.32454	0.32454	0.32454	0.32454	0.32454
193	0.32454	0.32454	0.32454	0.32454	0.32454	0.32454	0.32454	0.32454	0.32454	0.32454	0.32454	0.32454	0.32454	0.32454	0.32454	0.32454	0.32454	0.32454	0.32454	0.32454	0.32454	0.32454	0.32454	0.32454	0.32454	0.32454	0.32454	0.32454	0.32454	0.32454	0.32454	0.32454	0.32454	0.32454	0.32454	0.32454	0.32454	0.32454	0.32454	0.32454	0.32454	0.32454	0.32454	0.32454	0.32454	0.32454	0.32454	0.32454	0.32454
194	0.32454	0.32454	0.32454	0.32454	0.32454	0.32454	0.32454	0.32454	0.32454	0.32454	0.32454	0.32454	0.32454	0.32454	0.32454	0.32454	0.32454	0.32454	0.32454	0.32454	0.32454	0.32454	0.32454	0.32454	0.32454	0.32454	0.32454	0.32454	0.32454	0.32454	0.32454	0.32454	0.32454	0.32454	0.32454	0.32454	0.32454	0.32454	0.32454	0.32454	0.32454	0.32454	0.32454	0.32454	0.32454	0.32454	0.32454	0.32454	0.32454
195	0.32454	0.32454	0.32454	0.32454	0.32454	0.32454	0.32454	0.32454	0.32454	0.32454	0.32454	0.32454	0.32454	0.32454	0.32454	0.32454	0.32454	0.32454	0.32454	0.32454	0.32454	0.32454	0.32454	0.32454	0.32454	0.32454	0.32454	0.32454	0.32454	0.32454	0.32454	0.32454	0.32454	0.32454	0.32454	0.32454	0.32454	0.32454	0.32454	0.32454	0.32454	0.32454	0.32454	0.32454	0.32454	0.32454	0.32454	0.32454	0.32454
196	0.32454	0.32454	0.32454	0.32454	0.32454	0.32454	0.32454	0.32454	0.32454	0.32454	0.32454	0.32454	0.32454	0.32454	0.32454	0.32454	0.32454	0.32454	0.32454	0.32454	0.32454	0.32454	0.32454	0.32454	0.32454	0.32454	0.32454	0.32454	0.32454	0.32454	0.32454	0.32454	0.32454	0.32454	0.32454	0.32454	0.32454	0.32454	0.32454	0.32454	0.32454	0.32454	0.32454	0.32454	0.32454	0.32454	0.32454	0.32454	0.32454
197	0.32454	0.32454	0.32454	0.32454	0.32454	0.32454	0.32454	0.32454	0.32454	0.32454	0.32454	0.32454	0.32454	0.32454	0.32454	0.32454	0.32454	0.32454	0.32454	0.32454	0.32454	0.32454	0.32454	0.32454	0.32454	0.32454	0.32454	0.32454	0.32454	0.32454	0.32454	0.32454	0.32454	0.32454	0.32454	0.32454	0.32454	0.32454	0.32454	0.32454	0.32454	0.32454	0.32454	0.32454	0.32454	0.32454	0.32454	0.32454	0.32454
198	0.32454	0.32454	0.32454	0.32454	0.32454	0.32454	0.32454	0.32454	0.32454	0.32454	0.32454	0.32454	0.32454	0.32454	0.32454	0.32454	0.32454	0.32454	0.32454	0.32454	0.32454	0.32454	0.32454	0.32454	0.32454	0.32454	0.32454	0.32454	0.32454	0.32454	0.32454	0.32454	0.32454	0.32454	0.32454	0.32454	0.32454	0.32454	0.32454	0.32454	0.32454	0.32454	0.32454	0.32454	0.32454	0.32454	0.32454	0.32454	0.32454
199	0.32454	0.32454	0.32454	0.32454	0.32454	0.32454	0.32454	0.32454	0.32454	0.32454	0.32454	0.32454	0.32454	0.32454	0.32454	0.32454	0.32454	0.32454	0.32454	0.32454	0.32454	0.32454	0.32454	0.32454	0.32454	0.32454	0.32454	0.32454	0.32454	0.32454	0.32454	0.32454	0.32454	0.32454	0.32454	0.32454	0.32454	0.32454	0.32454	0.32454	0.32454	0.32454	0.32454	0.32454	0.32454	0.32454	0.32454	0.32454	0.32454
200	0.32455	0.32455	0.32455	0.32455	0.32455	0.32455	0.32455	0.32455	0.32455	0.32455	0.32455	0.32455	0.32455	0.32455	0.32455	0.32455	0.32455	0.32455	0.32455	0.32455	0.32455	0.32455	0.32455	0.32455	0.32455	0.32455	0.32455	0.32455	0.32455	0.32455	0.32455	0.32455	0.32455	0.32455	0.32455	0.32455	0.32455	0.32455	0.32455	0.32455	0.32455	0.32455	0.32455	0.32455	0.32455	0.32455	0.32455	0.32455	0.32455
201	0.33067	0.3299	0.3303	0.33435	0.33442	0.33303	0.32952	0.32953	0.33533	0.33071	0.33223	0.32991	0.33458	0.33496	0.33398	0.32956	0.33232	0.32973	0.33254	0.33271	0.3309	0.33197	0.3325	0.33056	0.33188	0.32996	0.32945	0.33278	0.3306	0.33369	0.33585	0.33189	0.3346	0.33004	0.33346	0.33273	0.33311	0.32871	0.3327	0.33437	0.3305	0.33426	0.33043	0.33141	0.33637	0.33035	0.33172	0.32874	0.33507
202	0.35927	0.35637	0.3562	0.3798	0.38242	0.37374	0.35082	0.35365	0.39008	0.35749	0.36963	0.35292	0.38407	0.3872	0.37796	0.35172	0.36876	0.35168	0.37109	0.37249	0.36219	0.36998	0.37216	0.35806	0.36691	0.35746	0.35162	0.37326	0.35844	0.37931	0.39276	0.3695	0.38533	0.35612	0.37853	0.3742	0.37064	0.34646	0.36804	0.38438	0.36086	0.38367	0.35796	0.36121	0.39672	0.35863	0.36452	0.34739	0.3871
203	0.41298	0.40702	0.40341	0.47004	0.48083	0.45463	0.38789	0.39891	0.50704	0.40557	0.44366	0.39331	0.48675	0.49736	0.46506	0.39116	0.43931	0.38979	0.44735	0.45191	0.42306	0.44713	0.45215	0.40892	0.43504	0.41096	0.39152	0.45463	0.41011	0.47324	0.51464	0.44571	0.49209	0.405	0.47175	0.45899	0.44105	0.37688	0.43342	0.48978	0.42066	0.48758	0.40942	0.41524	0.52811	0.41274	0.4264	0.38019	0.49594
204	0.49445	0.4839	0.47297	0.61984	0.64813	0.58732	0.43989	0.46605	0.71251	0.47607	0.56355	0.45074	0.66298	0.68898	0.60894	0.44741	0.55175	0.44336	0.57129	0.58218	0.51838	0.57414	0.58407	0.48503	0.54333	0.49329	0.44881	0.58891	0.48772	0.63253	0.72935	0.57089	0.67719	0.4782	0.63005	0.60073	0.55163	0.41835	0.5345	0.67247	0.51459	0.66729	0.48693	0.49603	0.76186	0.49558	0.52224	0.42576	0.68435
205	0.60992	0.59268	0.56915	0.83508	0.8856	0.78123	0.50842	0.55909	0.98537	0.57335	0.73944	0.52755	0.91033	0.95103	0.81691	0.52267	0.71563	0.51419	0.75291	0.77316	0.65662	0.76169	0.778	0.59173	0.70133	0.61114	0.52583	0.78576	0.59685	0.86203	1.0071	0.75576	0.93399	0.58069	0.8589	0.80863	0.71115	0.47117	0.67942	0.92747	0.65112	0.91946	0.59611	0.60943	1.0484	0.61375	0.66009	0.48487	0.94294
206	0.75761	0.73349	0.69312	1.0301	1.0729	0.98123	0.59523	0.67988	1.1337	0.69821	0.93593	0.62564	1.0906	1.1157	1.0143	0.61891	0.90491	0.60407	0.9509	0.97372	0.82866	0.96404	0.98014	0.72887	0.88785	0.76292	0.62465	0.9874	0.73694	1.0569	1.143	0.95741	1.1065	0.71327	1.0553	1.0117	0.89517	0.53641	0.85328	1.1031	0.82239	1.0982	0.73653	0.75334	1.16	0.76519	0.82985	0.55897	1.1103
207	0.90081	0.87702	0.82657	1.0874	1.105	1.0682	0.6968	0.81293	1.1246	0.83122	1.0452	0.73839	1.1113	1.1193	1.0814	0.73037	1.0246	0.70869	1.0531	1.0653	0.97016	1.0626	1.0694	0.86882	1.0142	0.90958	0.73886	1.0722	0.87797	1.1009	1.1265	1.0592	1.117	0.85251	1.1009	1.0843	1.0148	0.61356	0.98406	1.1164	0.9662	1.115	0.87822	0.89301	1.1313	0.91033	0.96788	0.64683	1.1171
208	0.9775	0.96398	0.92333	1.0554	1.0613	1.0522	0.79645	0.91454	1.067	0.9257	1.0461	0.84102	1.0632	1.0654	1.0542	0.83376	1.0376	0.80926	1.0482	1.0521	1.0171	1.0534	1.0542	0.95561	1.0345	0.98575	0.84324	1.0544	0.96206	1.0617	1.0669	1.0523	1.0653	0.94523	1.0623	1.0587	1.0309	0.69686	1.0181	1.0656	1.0164	1.0653	0.96287	0.96963	1.0687	0.9848	1.0131	0.73917	1.0643
209	0.97875	0.97518	0.95303	0.99594	0.99832	0.99822	0.86628	0.95065	1.0005	0.95298	0.99873	0.90071	0.999	0.99978	0.99638	0.89643	0.9959	0.87636	0.99841	0.9991	0.99366	1.0016	1.0003	0.96898	0.99634	0.98465	0.90395	0.9996	0.97193	0.99994	1.0001	1.0015	1.0002	0.96556	1.0007	1.0011	0.99143	0.77242	0.98835	1.0006	0.99474	1.0006	0.97287	0.97281	1.0014	0.98294	0.98965	0.81607	0.99891
210	0.93895	0.94073	0.93167	0.93023	0.9317	0.93409	0.88975	0.93339	0.93357	0.93024	0.93678	0.90856	0.93217	0.93282	0.93113	0.9074	0.93611	0.89528	0.93566	0.93526	0.94127	0.93808	0.93617	0.93643	0.93782	0.94308	0.91184	0.93519	0.9372	0.93356	0.93326	0.93833	0.93321	0.93714	0.93434	0.93582	0.93265	0.8227	0.93367	0.93369	0.94301	0.93372	0.9381	0.9346	0.9348	0.94119	0.93751	0.85767	0.93198
211	0.88246	0.88668	0.88477	0.86398	0.86553	0.86805	0.87417	0.88853	0.86811	0.88274	0.8713	0.88047	0.86612	0.86706	0.86491	0.88138	0.87135	0.87591	0.86996	0.86927	0.87921	0.87214	0.8701	0.88354	0.87349	0.88559	0.88339	0.86908	0.88321	0.86731	0.86801	0.87247	0.86732	0.88626	0.86807	0.86955	0.86832	0.83875	0.87089	0.86776	0.88116	0.86774	0.88403	0.87908	0.87004	0.88371	0.87566	0.86033	0.86615
212	0.82011	0.82536	0.82709	0.7988	0.80085	0.80254	0.83517	0.83176	0.8047	0.82481	0.80569	0.83348	0.80172	0.80318	0.7996	0.83554	0.80585	0.83443	0.80436	0.80372	0.8145	0.80654	0.80457	0.82287	0.80807	0.82272	0.836	0.80359	0.82201	0.8024	0.80491	0.80685	0.80323	0.82649	0.80314	0.8042	0.80297	0.82486	0.80603	0.80359	0.8165	0.80347	0.82278	0.81726	0.80757	0.82087	0.81109	0.83443	0.80214
213	0.7561	0.76176	0.76526	0.73535	0.73815	0.73847	0.78391	0.77032	0.74358	0.7629	0.7412	0.77745	0.7394	0.7415	0.73593	0.78012	0.74118	0.78168	0.74	0.73957	0.7497	0.7423	0.74048	0.75962	0.74332	0.75845	0.77965	0.73958	0.75851	0.7394	0.74413	0.74254	0.7413	0.76362	0.74011	0.7405	0.73829	0.79083	0.7413	0.74158	0.75169	0.74133	0.75925	0.75353	0.74752	0.75665	0.74636	0.7916	0.74032
214	0.69219	0.69792	0.70221	0.67382	0.67753	0.67614	0.72671	0.70739	0.68479	0.69982	0.67828	0.71747	0.67923	0.68207	0.67411	0.72045	0.6779	0.72361	0.67726	0.67715	0.68582	0.67976	0.67816	0.69594	0.67988	0.69444	0.71944	0.67736	0.69476	0.67843	0.68572	0.67991	0.68158	0.70008	0.67912	0.67869	0.6749	0.74479	0.67759	0.68175	0.68777	0.68137	0.69547	0.68974	0.68994	0.69267	0.68251	0.73958	0.68071
215	0.62918	0.63483	0.63935	0.61423	0.61898	0.61567	0.66709	0.64455	0.62827	0.63698	0.61709	0.65621	0.62118	0.62484	0.61421	0.65935	0.61624	0.66347	0.61628	0.61655	0.62331	0.61904	0.6177	0.63291	0.61801	0.63143	0.65802	0.61701	0.63172	0.61951	0.62962	0.61908	0.62403	0.63703	0.62016	0.61881	0.61308	0.6923	0.61529	0.6241	0.6252	0.62357	0.63241	0.62677	0.63476	0.62968	0.61999	0.68314	0.62329
216	0.56738	0.57284	0.57725	0.55651	0.56239	0.55698	0.60662	0.58239	0.57387	0.57492	0.55761	0.5948	0.56513	0.56968	0.55615	0.59801	0.55623	0.60271	0.55706	0.55774	0.56227	0.56011	0.55903	0.57091	0.55776	0.56967	0.5965	0.55847	0.56976	0.56251	0.57568	0.56003	0.56853	0.57494	0.56314	0.56079	0.55285	0.63647	0.55448	0.56849	0.56411	0.56779	0.57045	0.56493	0.58181	0.56794	0.55892	0.62466	0.56791
217	0.50688	0.5121	0.51618	0.50049	0.50756	0.49995	0.54611	0.52122	0.52136	0.51389	0.49977	0.53381	0.51087	0.51636	0.49977	0.53702	0.49781	0.54203	0.49946	0.5006	0.50273	0.50284	0.50204	0.51011	0.49909	0.50928	0.53541	0.50161	0.50904	0.50727	0.52365	0.50264	0.51485	0.51401	0.50787	0.50448	0.49419	0.57895	0.49517	0.5147	0.50451	0.51382	0.50973	0.50437	0.53084	0.50756	0.49934	0.56534	0.51436
218	0.44781	0.45275	0.45635	0.446	0.45428	0.44446	0.48613	0.46126	0.47047	0.45411	0.44345	0.47365	0.45817	0.46462	0.44493	0.47684	0.44091	0.48199	0.44341	0.44498	0.44469	0.44711	0.44659	0.45067	0.44193	0.45032	0.4752	0.44628	0.4497	0.45358	0.47324	0.44678	0.46275	0.4544	0.45415	0.44971	0.43705	0.52083	0.43737	0.46248	0.44641	0.46143	0.45039	0.4452	0.48155	0.4486	0.44125	0.50601	0.46239
219	0.39033	0.39496	0.39803	0.39296	0.40239	0.39047	0.42715	0.40278	0.42092	0.39586	0.38867	0.41472	0.40685	0.41424	0.39155	0.41785	0.38559	0.42301	0.38887	0.39087	0.38825	0.39288	0.39262	0.39281	0.38636	0.39296	0.41622	0.39244	0.39194	0.40129	0.42419	0.39243	0.41202	0.39634	0.40184	0.39639	0.3815	0.46286	0.38119	0.41163	0.3899	0.4104	0.39263	0.38765	0.43364	0.39125	0.38477	0.44728	0.41177
220	0.33486	0.33915	0.34167	0.34146	0.3519	0.33814	0.36968	0.34622	0.37257	0.33958	0.33566	0.35752	0.35686	0.36511	0.33976	0.36055	0.33212	0.36561	0.33607	0.33843	0.33375	0.34032	0.34031	0.33694	0.33266	0.33755	0.35896	0.34023	0.33619	0.35044	0.37631	0.33977	0.36256	0.34024	0.35097	0.34463	0.32788	0.40568	0.32701	0.36207	0.33532	0.36068	0.33687	0.33213	0.38687	0.33588	0.33028	0.3897	0.36242
221	0.28214	0.28604	0.28804	0.29195	0.30308	0.28798	0.31444	0.2923	0.32546	0.28608	0.28496	0.30279	0.30842	0.31735	0.29003	0.30566	0.28112	0.31053	0.28556	0.28817	0.28186	0.28992	0.29011	0.28384	0.28146	0.28482	0.30415	0.29012	0.2832	0.30133	0.3296	0.28929	0.31453	0.28687	0.30183	0.29483	0.27686	0.34995	0.27556	0.31395	0.28332	0.31243	0.28386	0.27945	0.34113	0.28322	0.27849	0.33395	0.31449
222	0.23339	0.23682	0.23836	0.24528	0.25664	0.24094	0.26252	0.24222	0.27995	0.23657	0.23763	0.25169	0.26215	0.27144	0.24325	0.25433	0.23371	0.25887	0.23833	0.24105	0.23374	0.24262	0.24297	0.23474	0.23388	0.23595	0.25293	0.24306	0.23421	0.2547	0.28437	0.24196	0.26846	0.23743	0.25516	0.24784	0.22962	0.29658	0.22805	0.26782	0.23506	0.26623	0.23482	0.23085	0.2966	0.23446	0.23059	0.281	0.2685
223	0.19023	0.19311	0.19425	0.20282	0.21377	0.19846	0.21545	0.19758	0.23688	0.19271	0.19514	0.20579	0.21916	0.22835	0.20083	0.20812	0.19142	0.21218	0.19588	0.1985	0.19097	0.19986	0.2003	0.19125	0.19146	0.19252	0.20688	0.20044	0.19082	0.21178	0.24139	0.19921	0.22536	0.19353	0.2122	0.20501	0.18772	0.24689	0.18608	0.22469	0.1921	0.22311	0.19136	0.18797	0.25386	0.19122	0.18818	0.23227	0.22547
224	0.15423	0.15651	0.15733	0.16614	0.17598	0.16212	0.17495	0.16003	0.19752	0.15608	0.15909	0.1668	0.18092	0.18946	0.16433	0.16873	0.15582	0.17218	0.15978	0.16212	0.15512	0.16322	0.16368	0.15497	0.15578	0.15613	0.16768	0.16384	0.15465	0.1741	0.20185	0.16263	0.18664	0.15679	0.17445	0.16791	0.15271	0.20251	0.15118	0.186	0.15603	0.18453	0.15508	0.15237	0.21394	0.15507	0.15282	0.18946	0.18679
225	0.12607	0.12777	0.12835	0.13632	0.14457	0.13291	0.14221	0.1304	0.16332	0.12741	0.13034	0.13572	0.14878	0.1562	0.1348	0.13721	0.12769	0.14	0.13094	0.13287	0.12692	0.13372	0.13414	0.12658	0.12761	0.12754	0.13637	0.1343	0.12635	0.14293	0.16723	0.13322	0.15372	0.12795	0.14321	0.13766	0.12525	0.16504	0.12396	0.15315	0.12761	0.15187	0.12668	0.12465	0.17824	0.12673	0.12516	0.15402	0.15388
226	0.10578	0.10698	0.10741	0.11389	0.1203	0.1112	0.11776	0.10887	0.13544	0.10674	0.1092	0.11287	0.12364	0.12961	0.1127	0.11396	0.10719	0.1161	0.10967	0.11115	0.10649	0.11176	0.11211	0.10614	0.10709	0.10684	0.11331	0.11225	0.10598	0.11898	0.1387	0.11137	0.12759	0.10711	0.11919	0.11484	0.1054	0.13556	0.1044	0.12712	0.10698	0.12608	0.10621	0.10478	0.14803	0.10626	0.10522	0.1268	0.12774
227	0.091777	0.092589	0.092929	0.097876	0.10262	0.095853	0.10049	0.093927	0.11415	0.092478	0.094357	0.096903	0.10513	0.10966	0.096991	0.097669	0.092899	0.099273	0.094717	0.095808	0.092312	0.096216	0.0965	0.092025	0.092808	0.092496	0.097177	0.09661	0.09191	0.10161	0.11671	0.095931	0.10811	0.09269	0.10176	0.09851	0.091638	0.11385	0.090896	0.10774	0.092643	0.10696	0.092068	0.091095	0.1241	0.092103	0.091436	0.10716	0.10824
228	0.082386	0.082927	0.083217	0.086885	0.090308	0.085392	0.088754	0.083884	0.098767	0.082919	0.084292	0.086131	0.092125	0.095443	0.086239	0.086658	0.083253	0.087875	0.084561	0.085348	0.082773	0.085614	0.085837	0.082566	0.08317	0.082859	0.08628	0.085926	0.082484	0.089554	0.10068	0.085407	0.094298	0.083015	0.089652	0.087288	0.082385	0.09868	0.081842	0.094027	0.08299	0.093449	0.082586	0.081943	0.10625	0.082599	0.082186	0.09364	0.094408
229	0.076287	0.076639	0.076901	0.079585	0.082022	0.078489	0.081032	0.077337	0.088115	0.076712	0.077682	0.07908	0.083324	0.085711	0.079117	0.079441	0.076949	0.080388	0.077883	0.078447	0.076557	0.078612	0.078787	0.076424	0.076875	0.076584	0.079142	0.078859	0.076363	0.081466	0.089512	0.078462	0.08488	0.076722	0.081529	0.079826	0.076363	0.08849	0.075969	0.08468	0.076694	0.084263	0.076426	0.076015	0.093588	0.076419	0.076175	0.084645	0.084971
230	0.072549	0.072768	0.073016	0.074956	0.07667	0.074151	0.07616	0.073287	0.081005	0.072904	0.073561	0.074681	0.077592	0.079289	0.074618	0.074924	0.073051	0.075681	0.073712	0.074112	0.072729	0.074205	0.074344	0.072659	0.072984	0.072719	0.074679	0.074403	0.072612	0.07626	0.082011	0.074097	0.078692	0.07285	0.076299	0.07508	0.072671	0.081878	0.072386	0.078546	0.072809	0.078248	0.072647	0.072401	0.084941	0.072623	0.072496	0.078877	0.078767
231	0.070509	0.070633	0.070873	0.072253	0.073437	0.071663	0.073317	0.071025	0.076478	0.070817	0.071233	0.072173	0.07408	0.07527	0.072011	0.072331	0.070888	0.072955	0.071347	0.071627	0.070619	0.071668	0.07178	0.0706	0.070827	0.070586	0.072125	0.071829	0.070563	0.073135	0.077195	0.071591	0.074846	0.070715	0.073156	0.072294	0.070656	0.077801	0.070453	0.074738	0.070658	0.074529	0.070578	0.07045	0.079272	0.070539	0.070493	0.075397	0.074908
232	0.069683	0.069739	0.069975	0.07094	0.071736	0.070507	0.071921	0.070042	0.073827	0.069959	0.070194	0.071016	0.072174	0.072991	0.070768	0.071114	0.069969	0.071643	0.07028	0.070473	0.069741	0.070477	0.070569	0.069761	0.069912	0.069693	0.070935	0.07061	0.069732	0.071513	0.074331	0.070423	0.072695	0.069822	0.071521	0.070921	0.069845	0.075527	0.069703	0.072616	0.06975	0.072471	0.069732	0.06969	0.075779	0.069681	0.069693	0.073548	0.072748
233	0.069726	0.069733	0.069968	0.070629	0.071143	0.070311	0.07156	0.069974	0.07254	0.06998	0.070083	0.070825	0.071432	0.071978	0.070508	0.07088	0.069943	0.071341	0.070149	0.070278	0.069746	0.070255	0.070332	0.069796	0.069891	0.069688	0.07072	0.070368	0.069771	0.070979	0.072887	0.070217	0.071774	0.069818	0.070977	0.070567	0.069898	0.074541	0.069799	0.071717	0.069734	0.071618	0.069761	0.069779	0.073873	0.069701	0.069754	0.072864	0.07182
234	0.070392	0.070365	0.070598	0.07104	0.071351	0.070805	0.071938	0.070561	0.072244	0.070631	0.070638	0.071324	0.071533	0.071881	0.070957	0.071348	0.070561	0.071761	0.07069	0.070773	0.070385	0.070731	0.070798	0.070456	0.070511	0.07032	0.071202	0.07083	0.070435	0.071229	0.072477	0.070705	0.071744	0.07045	0.071221	0.070947	0.070571	0.074475	0.070503	0.071703	0.070358	0.071639	0.070417	0.070479	0.073124	0.070351	0.070433	0.073013	0.071786
235	0.071511	0.07146	0.07169	0.07198	0.072146	0.071804	0.072851	0.071623	0.072676	0.071738	0.07168	0.072323	0.07225	0.072457	0.071923	0.072325	0.071647	0.072704	0.071722	0.071773	0.071485	0.071717	0.071776	0.071571	0.071599	0.071415	0.072189	0.071805	0.071552	0.072054	0.072827	0.071699	0.072369	0.071545	0.072041	0.071865	0.071697	0.075073	0.071651	0.072338	0.071448	0.072299	0.071528	0.071622	0.073229	0.071459	0.071562	0.073763	0.072407
236	0.072945	0.072875	0.073103	0.073289	0.073351	0.073155	0.074131	0.073013	0.073621	0.073161	0.073061	0.073666	0.0734	0.073505	0.07325	0.073653	0.073059	0.074007	0.073096	0.073124	0.072907	0.073058	0.073112	0.073	0.073011	0.072831	0.073524	0.073139	0.072983	0.073281	0.073712	0.073046	0.073451	0.07296	0.073264	0.073158	0.073137	0.076128	0.073105	0.073429	0.072861	0.073407	0.072956	0.073071	0.073936	0.072885	0.073003	0.074926	0.073487
237	0.0746	0.074516	0.074741	0.074862	0.07485	0.074756	0.075672	0.074636	0.074933	0.074807	0.074683	0.075252	0.074859	0.074891	0.074835	0.075228	0.074702	0.075563	0.074713	0.074725	0.074555	0.074651	0.074703	0.074651	0.074655	0.074474	0.075105	0.074728	0.074636	0.074795	0.074981	0.074644	0.074863	0.074601	0.074775	0.074719	0.074799	0.077502	0.074778	0.074846	0.074504	0.074837	0.074606	0.074738	0.075077	0.074534	0.074666	0.076381	0.074897
238	0.076414	0.076321	0.076542	0.076626	0.076563	0.076538	0.077398	0.076425	0.076515	0.076612	0.076479	0.077013	0.076545	0.076526	0.076608	0.07698	0.076512	0.077301	0.076506	0.076508	0.076367	0.076429	0.076478	0.076462	0.076465	0.076281	0.076861	0.076503	0.076449	0.076518	0.076533	0.076424	0.076515	0.076404	0.076497	0.076474	0.076623	0.079107	0.076607	0.076502	0.076312	0.076502	0.076417	0.07656	0.076537	0.076346	0.076487	0.078044	0.076548
239	0.078345	0.078244	0.07846	0.078531	0.078435	0.078455	0.079259	0.078335	0.078298	0.078534	0.078404	0.0789	0.078399	0.078345	0.078519	0.078861	0.078445	0.079171	0.078429	0.078424	0.078299	0.078342	0.07839	0.078389	0.078398	0.078207	0.078746	0.078415	0.078377	0.078396	0.078295	0.078339	0.078346	0.078325	0.078374	0.078373	0.078565	0.080879	0.078551	0.078336	0.078241	0.078341	0.078344	0.078495	0.078235	0.078274	0.078426	0.079859	0.078378
240	0.080358	0.080251	0.080461	0.080539	0.080423	0.080469	0.081215	0.08033	0.080227	0.080538	0.080421	0.080875	0.080374	0.080298	0.08053	0.080833	0.080467	0.081133	0.080446	0.080437	0.080316	0.080351	0.0804	0.080398	0.080418	0.080217	0.08072	0.080425	0.080387	0.080387	0.08021	0.080349	0.080306	0.080329	0.080364	0.080375	0.080592	0.08277	0.080577	0.080298	0.080256	0.080307	0.080353	0.080511	0.080106	0.080286	0.080447	0.081781	0.080338
241	0.082432	0.08232	0.082524	0.082625	0.082498	0.082555	0.083241	0.082388	0.082268	0.082602	0.082507	0.082916	0.082443	0.082353	0.082617	0.08287	0.082554	0.083164	0.082532	0.082523	0.082397	0.082435	0.082484	0.082468	0.082504	0.082289	0.08276	0.08251	0.082458	0.082464	0.082242	0.082433	0.082366	0.082395	0.08244	0.082457	0.082682	0.084746	0.082665	0.082358	0.082335	0.08237	0.082424	0.082586	0.08211	0.082361	0.082531	0.083781	0.082398
242	0.084548	0.084431	0.084628	0.084767	0.084636	0.084694	0.085314	0.084489	0.084389	0.084708	0.084642	0.085002	0.084578	0.084482	0.084758	0.084953	0.084688	0.085241	0.084669	0.084661	0.084522	0.084571	0.084621	0.084579	0.084636	0.084406	0.084845	0.084648	0.084571	0.084601	0.084359	0.084568	0.084497	0.084503	0.084577	0.084594	0.084816	0.086782	0.084795	0.08449	0.084459	0.084502	0.084537	0.084703	0.08421	0.084477	0.084657	0.085834	0.08453
243	0.086698	0.086576	0.086765	0.086954	0.086826	0.086875	0.087423	0.086623	0.086576	0.086846	0.086818	0.087121	0.086768	0.086672	0.086943	0.087071	0.08686	0.087353	0.086847	0.086841	0.086683	0.086749	0.086802	0.086723	0.086805	0.086556	0.086965	0.086829	0.086717	0.086789	0.086544	0.086746	0.086687	0.086644	0.086764	0.086777	0.086988	0.088861	0.086961	0.086679	0.086619	0.086691	0.086682	0.086852	0.086387	0.086628	0.086819	0.087927	0.08672
244	0.08887	0.088744	0.088923	0.089174	0.089052	0.089086	0.089554	0.088779	0.08881	0.089005	0.089021	0.089262	0.088997	0.088904	0.08916	0.08921	0.089058	0.089487	0.089053	0.089051	0.088868	0.088957	0.089012	0.08889	0.089001	0.08873	0.089106	0.089041	0.088885	0.089012	0.088779	0.088953	0.088917	0.088807	0.088987	0.088993	0.089184	0.090968	0.08915	0.088909	0.088803	0.088921	0.08885	0.089022	0.088619	0.088802	0.089004	0.090045	0.088952
245	0.091066	0.090936	0.091105	0.091429	0.091318	0.09133	0.09171	0.090958	0.091093	0.091188	0.091255	0.091427	0.091268	0.091182	0.091412	0.091373	0.091285	0.091646	0.09129	0.091293	0.09108	0.091197	0.091256	0.09108	0.091225	0.090928	0.091271	0.091286	0.091077	0.091274	0.091064	0.091192	0.091193	0.090995	0.091248	0.091244	0.091409	0.093103	0.091365	0.091183	0.091014	0.091193	0.091042	0.091217	0.090909	0.091001	0.091216	0.09219	0.091229
246	0.093283	0.093147	0.093305	0.093714	0.093617	0.093601	0.093884	0.093156	0.093416	0.093389	0.093515	0.093609	0.093574	0.093497	0.093692	0.093554	0.093537	0.093822	0.093553	0.093562	0.093314	0.093464	0.093527	0.093289	0.093472	0.093147	0.093453	0.093559	0.093288	0.093568	0.093392	0.093457	0.093504	0.0932	0.093541	0.093524	0.093656	0.095259	0.093603	0.093493	0.093247	0.093502	0.093254	0.093431	0.093244	0.093219	0.093448	0.094353	0.093542
247	0.095521	0.09538	0.095526	0.096032	0.095953	0.095903	0.096078	0.095374	0.095784	0.095611	0.095803	0.095811	0.095918	0.095855	0.096004	0.095754	0.095815	0.096018	0.095845	0.095862	0.095572	0.095762	0.095829	0.09552	0.095746	0.095388	0.095656	0.095864	0.095521	0.095897	0.095766	0.095753	0.095856	0.095427	0.09587	0.095837	0.09593	0.097437	0.095865	0.095844	0.095504	0.09585	0.095487	0.095667	0.095631	0.095461	0.095706	0.096537	0.095897
248	0.097782	0.097635	0.097768	0.098383	0.098326	0.098235	0.098291	0.097613	0.098196	0.097853	0.098119	0.098032	0.0983	0.098253	0.098348	0.097974	0.09812	0.098233	0.098167	0.098191	0.097855	0.098089	0.098162	0.097771	0.098046	0.097652	0.097877	0.098199	0.097775	0.098262	0.098186	0.098078	0.098249	0.097676	0.098235	0.098182	0.098231	0.099635	0.098152	0.098234	0.097786	0.098237	0.097741	0.097925	0.098067	0.097725	0.097987	0.098741	0.098291
249	0.10007	0.099913	0.10003	0.10077	0.10074	0.1006	0.10052	0.099873	0.10065	0.10012	0.10047	0.10027	0.10072	0.10069	0.10073	0.10021	0.10045	0.10047	0.10052	0.10055	0.10016	0.10045	0.10053	0.10005	0.10037	0.09994	0.10012	0.10057	0.10005	0.10066	0.10065	0.10043	0.10068	0.099946	0.10064	0.10056	0.10056	0.10185	0.10047	0.10067	0.10009	0.10067	0.10002	0.10021	0.10055	0.10001	0.10029	0.10096	0.10073
250	0.10238	0.10222	0.10232	0.10321	0.10321	0.10301	0.10278	0.10216	0.10318	0.10241	0.10286	0.10254	0.10321	0.1032	0.10316	0.10248	0.10283	0.10273	0.10292	0.10296	0.10251	0.10286	0.10294	0.10235	0.10275	0.10226	0.10239	0.10298	0.10236	0.10312	0.10319	0.10284	0.10318	0.10225	0.10309	0.10299	0.10293	0.1041	0.10282	0.10316	0.10244	0.10316	0.10233	0.10252	0.10312	0.10233	0.10264	0.10321	0.10323
251	0.10473	0.10456	0.10464	0.10569	0.10572	0.10546	0.10506	0.10448	0.10576	0.10473	0.10529	0.10483	0.10574	0.10576	0.10563	0.10477	0.10524	0.10501	0.10535	0.10541	0.10489	0.1053	0.10539	0.10469	0.10515	0.10461	0.10468	0.10544	0.1047	0.10562	0.10578	0.10528	0.10573	0.10458	0.10559	0.10546	0.10533	0.10636	0.1052	0.1057	0.10482	0.10569	0.10467	0.10486	0.10574	0.10468	0.10501	0.10548	0.10578
252	0.1071	0.10692	0.10698	0.10821	0.10828	0.10795	0.10736	0.10682	0.10839	0.10707	0.10775	0.10715	0.10831	0.10836	0.10813	0.10708	0.10768	0.10732	0.10782	0.1079	0.1073	0.10778	0.10788	0.10704	0.10758	0.10699	0.10699	0.10793	0.10706	0.10817	0.10843	0.10776	0.10832	0.10693	0.10814	0.10798	0.10777	0.10865	0.10761	0.10829	0.10722	0.10828	0.10703	0.10723	0.10842	0.10706	0.10742	0.10777	0.10838
253	0.1095	0.10931	0.10935	0.11077	0.11088	0.11048	0.10969	0.10918	0.11107	0.10944	0.11025	0.10948	0.11093	0.11102	0.11068	0.10942	0.11016	0.10965	0.11033	0.11042	0.10973	0.1103	0.11041	0.10943	0.11005	0.10939	0.10933	0.11046	0.10945	0.11076	0.11113	0.11027	0.11096	0.10931	0.11073	0.11053	0.11023	0.11096	0.11006	0.11093	0.10966	0.11091	0.10942	0.10962	0.11115	0.10947	0.10985	0.11009	0.11102
254	0.11194	0.11174	0.11175	0.11338	0.11354	0.11306	0.11204	0.11157	0.11383	0.11184	0.11279	0.11185	0.11362	0.11374	0.11329	0.11178	0.11268	0.112	0.11288	0.11299	0.11221	0.11287	0.11299	0.11185	0.11256	0.11184	0.1117	0.11305	0.11187	0.11341	0.11391	0.11283	0.11368	0.11172	0.11337	0.11313	0.11275	0.11329	0.11254	0.11364	0.11213	0.11361	0.11184	0.11205	0.11398	0.11191	0.11233	0.11243	0.11374
255	0.11443	0.11422	0.1142	0.11609	0.11631	0.11572	0.11444	0.11402	0.11671	0.11429	0.11541	0.11426	0.11641	0.11658	0.11598	0.11419	0.11528	0.1144	0.11552	0.11564	0.11475	0.11552	0.11565	0.11432	0.11515	0.11434	0.11411	0.11572	0.11435	0.11615	0.11681	0.11548	0.1165	0.11418	0.11612	0.11583	0.11533	0.11567	0.11509	0.11646	0.11467	0.11642	0.11432	0.11454	0.11693	0.11441	0.11487	0.11481	0.11657
256	0.11696	0.11673	0.11669	0.11886	0.11914	0.11843	0.11686	0.1165	0.11967	0.11678	0.11809	0.1167	0.11928	0.1195	0.11873	0.11663	0.11792	0.11683	0.11821	0.11835	0.11734	0.11822	0.11837	0.11683	0.11778	0.11688	0.11655	0.11844	0.11687	0.11896	0.1198	0.11818	0.11939	0.11669	0.11893	0.11858	0.11796	0.11807	0.11769	0.11934	0.11726	0.1193	0.11684	0.11706	0.11998	0.11695	0.11745	0.11722	0.11947
257	0.11953	0.11929	0.11921	0.12169	0.12204	0.12121	0.11932	0.11902	0.12271	0.1193	0.12081	0.11918	0.12221	0.12249	0.12154	0.1191	0.12062	0.11929	0.12095	0.12112	0.11997	0.12098	0.12115	0.11938	0.12046	0.11946	0.11903	0.12122	0.11942	0.12184	0.12287	0.12093	0.12236	0.11922	0.1218	0.1214	0.12063	0.12051	0.12033	0.12231	0.11989	0.12225	0.11939	0.11962	0.12312	0.11952	0.12008	0.11966	0.12245
258	0.12214	0.12189	0.12176	0.12458	0.12501	0.12403	0.12181	0.12157	0.12584	0.12186	0.12359	0.12168	0.12522	0.12556	0.12441	0.1216	0.12336	0.12179	0.12374	0.12394	0.12265	0.1238	0.12398	0.12196	0.12319	0.12208	0.12153	0.12406	0.12201	0.12478	0.12603	0.12374	0.12541	0.1218	0.12474	0.12427	0.12336	0.12297	0.12302	0.12534	0.12256	0.12528	0.12198	0.12222	0.12635	0.12214	0.12275	0.12213	0.1255
259	0.12481	0.12454	0.12438	0.12758	0.1281	0.12696	0.12434	0.12417	0.1291	0.12448	0.12646	0.12424	0.12835	0.12876	0.12738	0.12415	0.12618	0.12433	0.12662	0.12686	0.12539	0.1267	0.12691	0.12461	0.12599	0.12476	0.12409	0.127	0.12467	0.12783	0.12933	0.12663	0.12858	0.12443	0.1278	0.12725	0.12617	0.12548	0.12578	0.12851	0.1253	0.12843	0.12464	0.12489	0.12975	0.12483	0.12549	0.12464	0.12869
260	0.12756	0.12726	0.12705	0.13069	0.13132	0.12999	0.12693	0.12684	0.13254	0.12716	0.12942	0.12685	0.13162	0.13212	0.13046	0.12676	0.1291	0.12692	0.12961	0.12988	0.12822	0.12972	0.12994	0.12732	0.12889	0.12752	0.1267	0.13004	0.12739	0.13102	0.13281	0.12964	0.1319	0.12713	0.13098	0.13034	0.12906	0.12803	0.12862	0.13182	0.12813	0.13172	0.12736	0.12762	0.13333	0.12758	0.12831	0.1272	0.13202
261	0.13036	0.13005	0.12978	0.1339	0.13465	0.13311	0.12956	0.12956	0.13611	0.12989	0.13247	0.12951	0.13501	0.1356	0.13364	0.12941	0.13209	0.12956	0.13268	0.13299	0.13112	0.13282	0.13306	0.13009	0.13186	0.13034	0.12936	0.13318	0.13017	0.13431	0.13644	0.13272	0.13535	0.12989	0.13426	0.13353	0.13203	0.13063	0.13153	0.13526	0.13102	0.13514	0.13014	0.13041	0.13708	0.1304	0.1312	0.12981	0.13548
262	0.13325	0.1329	0.13258	0.13725	0.13813	0.13635	0.13225	0.13235	0.13988	0.13269	0.13563	0.13223	0.13856	0.13927	0.13695	0.13213	0.13519	0.13226	0.13586	0.13622	0.13411	0.13604	0.13631	0.13294	0.13494	0.13324	0.13209	0.13644	0.13302	0.13775	0.14027	0.13593	0.13898	0.13272	0.1377	0.13685	0.1351	0.13328	0.13453	0.13887	0.134	0.13873	0.133	0.13328	0.14105	0.1333	0.13418	0.13247	0.13912
263	0.13622	0.13585	0.13546	0.14077	0.14181	0.13974	0.13501	0.13522	0.14389	0.13557	0.13892	0.13502	0.14231	0.14316	0.14042	0.13491	0.13841	0.13502	0.13918	0.13959	0.1372	0.1394	0.13971	0.13587	0.13813	0.13623	0.13488	0.13985	0.13596	0.14136	0.14436	0.13928	0.14281	0.13563	0.14132	0.14033	0.13829	0.13598	0.13765	0.14269	0.13709	0.14253	0.13594	0.13624	0.14532	0.13629	0.13726	0.1352	0.14297
264	0.13928	0.13888	0.13841	0.14443	0.14565	0.14326	0.13782	0.13816	0.14812	0.13853	0.14233	0.13787	0.14625	0.14725	0.14403	0.13776	0.14174	0.13785	0.14263	0.1431	0.14039	0.14289	0.14323	0.13888	0.14143	0.13931	0.13773	0.1434	0.13899	0.14514	0.14867	0.14275	0.14684	0.13862	0.14509	0.14395	0.14158	0.13875	0.14086	0.1467	0.14028	0.14651	0.13897	0.13928	0.14984	0.13937	0.14044	0.13798	0.14702
265	0.14246	0.14202	0.14147	0.14833	0.14977	0.14699	0.14073	0.1412	0.15274	0.14159	0.14592	0.14081	0.15048	0.15168	0.14787	0.14069	0.14525	0.14076	0.14626	0.14681	0.14373	0.14658	0.14697	0.142	0.1449	0.14252	0.14068	0.14715	0.14213	0.14919	0.1534	0.14643	0.1512	0.14172	0.14914	0.14781	0.14504	0.14159	0.14422	0.15104	0.14361	0.15081	0.14211	0.14244	0.15483	0.14257	0.14376	0.14083	0.15141
266	0.14575	0.14527	0.14462	0.15243	0.15413	0.1509	0.1437	0.14434	0.15767	0.14474	0.14968	0.14384	0.15497	0.1564	0.1519	0.14371	0.1489	0.14375	0.15006	0.15069	0.14719	0.15045	0.15089	0.14522	0.1485	0.14583	0.14371	0.15109	0.14537	0.15346	0.15846	0.15027	0.15583	0.14492	0.1534	0.15185	0.14864	0.14449	0.1477	0.15564	0.14706	0.15537	0.14535	0.1457	0.1602	0.14589	0.14721	0.14376	0.15607
267	0.14916	0.14864	0.14788	0.15678	0.15879	0.15502	0.14676	0.14758	0.16301	0.148	0.15363	0.14695	0.15978	0.16148	0.15616	0.14681	0.15272	0.14682	0.15406	0.15479	0.1508	0.15452	0.15502	0.14856	0.15228	0.14928	0.14682	0.15525	0.14873	0.15801	0.16396	0.15432	0.16081	0.14823	0.15795	0.15614	0.15241	0.14747	0.15134	0.16058	0.15066	0.16026	0.14871	0.14908	0.16608	0.14933	0.1508	0.14677	0.16108
268	0.15272	0.15214	0.15126	0.16143	0.1638	0.1594	0.14991	0.15094	0.16887	0.15138	0.1578	0.15016	0.16499	0.16702	0.16071	0.15002	0.15675	0.14999	0.1583	0.15914	0.15458	0.15885	0.15942	0.15203	0.15625	0.15287	0.15004	0.15968	0.15222	0.1629	0.17001	0.15861	0.16623	0.15167	0.16283	0.16072	0.15638	0.15054	0.15516	0.16596	0.15444	0.16558	0.15221	0.15261	0.17262	0.15291	0.15456	0.14986	0.16654
269	0.15644	0.1558	0.15477	0.16645	0.16928	0.1641	0.15318	0.15443	0.17541	0.15491	0.16225	0.15349	0.17071	0.17316	0.16562	0.15334	0.16103	0.15327	0.16282	0.1638	0.15857	0.16348	0.16413	0.15566	0.16047	0.15663	0.15338	0.16443	0.15587	0.16822	0.17681	0.1632	0.1722	0.15526	0.16814	0.16566	0.16058	0.1537	0.15918	0.17188	0.15841	0.17142	0.15587	0.15629	0.18005	0.15667	0.15852	0.15306	0.17257
270	0.16033	0.15962	0.15843	0.17187	0.17524	0.16913	0.15655	0.15807	0.18267	0.15857	0.16699	0.15694	0.17695	0.17992	0.17089	0.15677	0.16557	0.15666	0.16765	0.16878	0.16276	0.16843	0.16917	0.15944	0.16492	0.16057	0.15684	0.16952	0.15968	0.17399	0.18439	0.1681	0.17876	0.159	0.1739	0.17097	0.16502	0.15696	0.16342	0.17838	0.16259	0.17782	0.15968	0.16014	0.18843	0.16061	0.16269	0.15635	0.17919
271	0.16443	0.16364	0.16226	0.1778	0.18185	0.17458	0.16005	0.16187	0.19098	0.16241	0.17208	0.16053	0.18393	0.18757	0.17664	0.16035	0.17043	0.16018	0.17285	0.17418	0.16722	0.17378	0.17465	0.16341	0.16969	0.16473	0.16043	0.17505	0.16369	0.18036	0.19312	0.17341	0.18614	0.16292	0.18026	0.17678	0.16977	0.16032	0.16793	0.18568	0.16703	0.18501	0.16369	0.16419	0.19824	0.16476	0.16711	0.15976	0.18666
272	0.16876	0.16788	0.16628	0.18433	0.18925	0.18053	0.16368	0.16586	0.20058	0.16643	0.1776	0.16427	0.19179	0.1963	0.18295	0.16407	0.17566	0.16385	0.1785	0.18007	0.17197	0.17962	0.18063	0.1676	0.17481	0.16913	0.16418	0.1811	0.16791	0.18746	0.2033	0.17917	0.19454	0.16705	0.18734	0.18316	0.17486	0.16381	0.17273	0.19397	0.17177	0.19314	0.16792	0.16846	0.2099	0.16914	0.17182	0.1633	0.19516
273	0.17335	0.17236	0.1705	0.19159	0.19759	0.18705	0.16747	0.17004	0.21183	0.17067	0.18361	0.16818	0.20074	0.20639	0.18994	0.16796	0.18131	0.16767	0.18465	0.18652	0.17705	0.18601	0.18719	0.17201	0.18033	0.17379	0.1681	0.18775	0.17237	0.19542	0.21531	0.18548	0.20418	0.1714	0.19529	0.19023	0.18036	0.16742	0.17788	0.20347	0.17683	0.20243	0.17239	0.17297	0.22395	0.1738	0.17685	0.16698	0.20495
274	0.17824	0.17713	0.17497	0.19978	0.2072	0.19431	0.17143	0.17447	0.22539	0.17514	0.19021	0.17227	0.21115	0.21833	0.19777	0.17203	0.18748	0.17166	0.19145	0.19368	0.18253	0.19309	0.1945	0.1767	0.18634	0.17878	0.1722	0.19516	0.17712	0.20452	0.22995	0.19246	0.21551	0.17602	0.20437	0.19817	0.18633	0.17117	0.18344	0.21462	0.18228	0.2133	0.17714	0.17778	0.24155	0.17877	0.18226	0.17081	0.21648
275	0.18347	0.18222	0.1797	0.20911	0.2184	0.20246	0.17558	0.17916	0.24206	0.17988	0.19753	0.17657	0.22342	0.23272	0.20665	0.17631	0.19427	0.17585	0.19901	0.2017	0.18847	0.20101	0.20271	0.1817	0.19293	0.18413	0.17652	0.2035	0.18218	0.21505	0.24818	0.20025	0.22906	0.18093	0.21487	0.20719	0.19287	0.17509	0.18948	0.22792	0.18819	0.22621	0.18221	0.18292	0.26413	0.18411	0.18813	0.1748	0.23029
276	0.18912	0.18768	0.18475	0.21995	0.23177	0.21174	0.17994	0.18415	0.2633	0.18494	0.20575	0.18111	0.23829	0.25061	0.21689	0.18082	0.20181	0.18026	0.20754	0.21082	0.19496	0.21001	0.21207	0.18705	0.20022	0.18991	0.18108	0.21303	0.18761	0.22751	0.27176	0.20908	0.24573	0.18618	0.22728	0.21762	0.20011	0.17918	0.19609	0.24423	0.19466	0.24198	0.18766	0.18844	0.29449	0.18987	0.19453	0.17899	0.24735
277	0.19524	0.19359	0.19015	0.23274	0.24806	0.22245	0.18454	0.18949	0.29119	0.19036	0.21509	0.18592	0.25672	0.27345	0.22887	0.1856	0.21028	0.18491	0.21727	0.22133	0.20212	0.22035	0.22289	0.19283	0.20838	0.19619	0.18591	0.22408	0.19348	0.24252	0.30329	0.2192	0.26677	0.19183	0.24224	0.22986	0.2082	0.18346	0.2034	0.26474	0.20178	0.2617	0.19354	0.19442	0.33683	0.19613	0.20158	0.18338	0.26895
278	0.20192	0.20002	0.19597	0.24818	0.26848	0.23505	0.18941	0.19523	0.32941	0.1962	0.22586	0.19104	0.28028	0.3037	0.2432	0.19068	0.21993	0.18984	0.22856	0.23364	0.2101	0.23245	0.23563	0.19909	0.21762	0.20308	0.19105	0.23713	0.19985	0.2611	0.34735	0.23101	0.29428	0.19795	0.26074	0.24454	0.21734	0.18795	0.21155	0.29144	0.2097	0.2872	0.19993	0.20092	0.39887	0.20299	0.20941	0.18802	0.29731
279	0.20928	0.20707	0.20228	0.26725	0.29483	0.25015	0.19458	0.20145	0.38386	0.20253	0.23847	0.1965	0.31139	0.34528	0.26069	0.1961	0.23105	0.19509	0.24187	0.24835	0.21907	0.24687	0.25093	0.20594	0.22822	0.21069	0.19655	0.25285	0.20684	0.28472	0.41144	0.24503	0.33151	0.20462	0.28425	0.26255	0.22781	0.19269	0.22075	0.32742	0.21861	0.32131	0.20694	0.20807	0.49287	0.21057	0.2182	0.19291	0.33589
280	0.21746	0.21486	0.20917	0.29146	0.33001	0.26865	0.20011	0.20823	0.46432	0.20944	0.25354	0.20237	0.354	0.40469	0.28261	0.20191	0.2441	0.2007	0.25789	0.26632	0.2293	0.26443	0.26972	0.21349	0.24057	0.21919	0.20246	0.27224	0.21455	0.31573	0.50759	0.26203	0.38389	0.21194	0.3151	0.28522	0.23999	0.19769	0.23126	0.37778	0.22876	0.36868	0.21468	0.21597	0.63499	0.21902	0.22819	0.19811	0.39041
281	0.22665	0.22356	0.21674	0.32317	0.37872	0.29193	0.20603	0.21566	0.5848	0.21703	0.27192	0.20871	0.41455	0.49232	0.31089	0.20819	0.25969	0.20673	0.27761	0.28882	0.24112	0.28635	0.29342	0.22187	0.25522	0.22878	0.20884	0.29679	0.22314	0.3579	0.65054	0.28316	0.4602	0.22005	0.357	0.31462	0.25439	0.20301	0.24344	0.45084	0.24047	0.43692	0.22331	0.22481	0.82518	0.22855	0.2397	0.20364	0.47018
282	0.23709	0.23337	0.22514	0.36606	0.44837	0.32204	0.21242	0.2239	0.75331	0.22547	0.2949	0.21559	0.50294	0.6213	0.34853	0.215	0.27872	0.21324	0.30252	0.31778	0.255	0.31447	0.32416	0.2313	0.27294	0.23973	0.21579	0.32883	0.23283	0.41719	0.83586	0.31011	0.57282	0.22913	0.41589	0.354	0.27177	0.20866	0.25781	0.55858	0.25422	0.5373	0.23304	0.2348	0.99503	0.23943	0.25316	0.20957	0.58787
283	0.2491	0.24459	0.23454	0.426	0.54968	0.36225	0.21935	0.2331	0.93206	0.23492	0.32443	0.22313	0.63104	0.79275	0.40029	0.22245	0.30251	0.22032	0.33491	0.35625	0.27161	0.35167	0.36534	0.242	0.29487	0.25243	0.2234	0.37197	0.24387	0.50274	0.99299	0.34556	0.72994	0.2394	0.50083	0.4085	0.29323	0.21472	0.27507	0.71055	0.27064	0.68078	0.24414	0.24624	1.0535	0.25203	0.2692	0.21595	0.74989
284	0.26315	0.25758	0.2452	0.51151	0.69136	0.41754	0.22692	0.2435	1.0296	0.24562	0.36348	0.23143	0.79691	0.95491	0.47334	0.23065	0.33305	0.22808	0.37825	0.40889	0.2919	0.40237	0.42213	0.25433	0.32271	0.26739	0.23179	0.43178	0.25664	0.62504	1.043	0.39358	0.90262	0.25116	0.62233	0.4858	0.32035	0.22122	0.29625	0.88417	0.29067	0.85364	0.25699	0.25951	1.0291	0.26685	0.28868	0.22285	0.92035
285	0.27983	0.27286	0.25742	0.63163	0.85649	0.49517	0.23525	0.2554	1.0289	0.2579	0.41656	0.24067	0.94924	1.0264	0.57677	0.23975	0.37333	0.23663	0.43784	0.48254	0.31723	0.47315	0.50205	0.26872	0.35899	0.28531	0.24115	0.51618	0.27161	0.78239	1.017	0.4603	1.0094	0.26482	0.7792	0.59523	0.35556	0.22825	0.32283	1.0014	0.31564	0.98578	0.27207	0.27517	0.9769	0.28458	0.31287	0.23035	1.016
286	0.30003	0.29114	0.27162	0.78266	0.97826	0.60335	0.24449	0.26917	0.98512	0.27218	0.49011	0.25104	1.0151	1.0133	0.71464	0.24996	0.4278	0.24614	0.52092	0.58542	0.34963	0.57215	0.61326	0.28581	0.40749	0.30721	0.25167	0.63304	0.28948	0.93018	0.96479	0.55364	1.02	0.28092	0.92784	0.73877	0.40244	0.23589	0.35703	1.021	0.34753	1.021	0.29008	0.29395	0.91656	0.30622	0.34361	0.23858	1.0182
287	0.32496	0.31344	0.28837	0.92171	1.0091	0.74204	0.25482	0.28537	0.92743	0.28904	0.59138	0.26281	1.0018	0.96609	0.86379	0.26151	0.50256	0.25682	0.6342	0.71973	0.39209	0.70297	0.75437	0.30646	0.4736	0.33455	0.26362	0.77777	0.3112	1.0006	0.90462	0.67869	0.9813	0.30023	1.0001	0.88646	0.46611	0.24425	0.40206	0.98581	0.38925	0.99234	0.312	0.31691	0.85508	0.33318	0.38362	0.24765	0.97643
288	0.3564	0.34117	0.30846	0.98819	0.98024	0.88133	0.26649	0.30471	0.86619	0.30927	0.72105	0.27631	0.95523	0.90761	0.96476	0.27474	0.60378	0.26893	0.77228	0.86144	0.44881	0.84581	0.89204	0.33188	0.56362	0.36942	0.27737	0.91059	0.33812	0.99294	0.84315	0.82136	0.9257	0.32381	0.99346	0.97599	0.55275	0.25345	0.46245	0.93143	0.4449	0.94027	0.33919	0.34556	0.79464	0.36751	0.43676	0.25775	0.91976
289	0.39685	0.37637	0.33298	0.98109	0.92871	0.96464	0.27981	0.32823	0.80504	0.33398	0.85538	0.292	0.89731	0.84637	0.98565	0.29009	0.73003	0.28282	0.89854	0.95548	0.52508	0.94762	0.96938	0.3638	0.68014	0.41478	0.29339	0.97597	0.37214	0.94934	0.78258	0.93323	0.86505	0.35317	0.95027	0.9859	0.66566	0.26365	0.54358	0.87108	0.51974	0.88058	0.37361	0.38201	0.73607	0.41209	0.50802	0.26907	0.85887
290	0.44969	0.42183	0.36345	0.9387	0.8694	0.97381	0.2952	0.35731	0.74527	0.3647	0.94422	0.31048	0.83629	0.78536	0.95543	0.30811	0.85604	0.29894	0.9628	0.97454	0.6249	0.97468	0.97345	0.40463	0.80875	0.47458	0.31231	0.97113	0.41592	0.89278	0.72374	0.97273	0.80379	0.39039	0.89386	0.95055	0.7932	0.27507	0.64851	0.80979	0.61796	0.8193	0.41796	0.4292	0.67965	0.47076	0.60187	0.2819	0.79767
291	0.51897	0.48114	0.40193	0.88305	0.8083	0.93943	0.31319	0.3939	0.68736	0.40352	0.96278	0.33256	0.77529	0.72573	0.90457	0.32959	0.93599	0.31789	0.96018	0.94482	0.74311	0.94893	0.93673	0.45751	0.90917	0.55303	0.33498	0.93056	0.47289	0.83225	0.66693	0.9538	0.74354	0.43829	0.83337	0.89763	0.8981	0.28794	0.76857	0.74938	0.73533	0.75863	0.47572	0.4908	0.62542	0.54772	0.71598	0.29659	0.7376
292	0.60754	0.5579	0.45112	0.82295	0.74762	0.88741	0.3345	0.44051	0.63148	0.45316	0.93441	0.35933	0.71548	0.66791	0.84604	0.35556	0.95064	0.34047	0.92163	0.89471	0.85358	0.90042	0.88373	0.526	0.9474	0.65146	0.36256	0.876	0.54664	0.77125	0.61218	0.90814	0.68494	0.50024	0.77236	0.83837	0.94365	0.30259	0.87289	0.69053	0.84724	0.69943	0.55047	0.57023	0.57327	0.6446	0.82958	0.31357	0.67924
293	0.71164	0.65259	0.51401	0.76209	0.68824	0.82876	0.36006	0.5001	0.57755	0.5166	0.88548	0.39221	0.65733	0.612	0.78539	0.38736	0.92169	0.36772	0.8684	0.83678	0.9189	0.8431	0.82473	0.61214	0.93211	0.76053	0.39655	0.81647	0.63826	0.71116	0.55938	0.85195	0.62818	0.57903	0.71225	0.77757	0.93348	0.31942	0.92606	0.63352	0.91609	0.642	0.64313	0.66709	0.52297	0.75303	0.90607	0.33345	0.62275
294	0.81278	0.75573	0.59252	0.70193	0.6305	0.76826	0.39108	0.57494	0.52542	0.59566	0.82832	0.43299	0.60097	0.55793	0.72484	0.42672	0.87319	0.40099	0.80957	0.77643	0.92727	0.78291	0.76415	0.71138	0.88973	0.85383	0.43883	0.75581	0.74019	0.65255	0.50832	0.79209	0.57327	0.67316	0.6536	0.71713	0.89356	0.33896	0.92436	0.57835	0.92771	0.5864	0.74548	0.76985	0.47424	0.8478	0.92599	0.35695	0.5681
295	0.8813	0.84313	0.68371	0.64307	0.57447	0.70788	0.42905	0.6635	0.47483	0.68714	0.76839	0.4837	0.54634	0.50552	0.6653	0.47561	0.81656	0.44191	0.74921	0.71598	0.89777	0.72242	0.70382	0.80602	0.83577	0.90253	0.49149	0.69561	0.83046	0.59558	0.45872	0.73158	0.52006	0.77048	0.5966	0.65784	0.84073	0.36186	0.88966	0.52488	0.89998	0.53253	0.83481	0.85273	0.42678	0.89964	0.90328	0.38503	0.51513
296	0.90115	0.88932	0.77439	0.58572	0.52006	0.64848	0.4756	0.75516	0.42553	0.77739	0.70809	0.54591	0.49328	0.45454	0.60716	0.5357	0.75701	0.49219	0.68904	0.65639	0.85022	0.66269	0.64453	0.86964	0.77719	0.90258	0.55603	0.63654	0.88288	0.54024	0.41033	0.67168	0.46834	0.84685	0.54122	0.6	0.78262	0.38889	0.83973	0.47292	0.85324	0.48018	0.88512	0.89214	0.38037	0.90254	0.85901	0.41882	0.46363
297	0.88186	0.89016	0.84218	0.52989	0.46709	0.59039	0.53201	0.82898	0.37736	0.84394	0.64847	0.61908	0.44158	0.40479	0.5505	0.6069	0.69694	0.55291	0.62982	0.59806	0.79469	0.6042	0.58659	0.88822	0.71727	0.87099	0.63142	0.57886	0.8897	0.48639	0.36301	0.61292	0.41789	0.88189	0.48734	0.54366	0.72284	0.42099	0.78317	0.42225	0.79808	0.42915	0.88986	0.88755	0.33494	0.87264	0.80503	0.45958	0.4134
298	0.84083	0.86026	0.87061	0.47547	0.41542	0.53371	0.598	0.86602	0.33032	0.87085	0.58998	0.69756	0.39112	0.3562	0.49527	0.68457	0.63741	0.62289	0.57185	0.54112	0.73601	0.54707	0.53006	0.86984	0.6575	0.82364	0.7109	0.5226	0.86354	0.43387	0.31684	0.5555	0.36863	0.87589	0.43479	0.48876	0.66305	0.45911	0.72413	0.37278	0.73954	0.37933	0.8624	0.85464	0.29073	0.82615	0.747	0.50836	0.36434
299	0.78932	0.81442	0.86169	0.42236	0.36499	0.47838	0.66954	0.86426	0.28477	0.8608	0.53275	0.76855	0.34191	0.30896	0.44137	0.75714	0.57887	0.69622	0.5152	0.48553	0.67649	0.4913	0.47489	0.83017	0.59854	0.76894	0.78038	0.4677	0.8197	0.38262	0.27227	0.49944	0.32066	0.8432	0.38351	0.43519	0.60397	0.50397	0.66458	0.32458	0.68005	0.33077	0.81786	0.80731	0.24838	0.77189	0.68767	0.56526	0.3166
300	0.73297	0.76089	0.82839	0.37056	0.31602	0.42434	0.73706	0.8353	0.2415	0.82686	0.47681	0.81635	0.2943	0.26364	0.38876	0.80902	0.52151	0.76109	0.45984	0.43124	0.61724	0.43683	0.42101	0.77987	0.54066	0.7111	0.82412	0.41409	0.76722	0.33274	0.23019	0.44467	0.27448	0.79655	0.3336	0.38291	0.54593	0.55547	0.60545	0.27814	0.62077	0.28391	0.76501	0.75307	0.209	0.71425	0.62836	0.62812	0.27069
301	0.67471	0.70387	0.78207	0.32029	0.26909	0.37164	0.78738	0.79133	0.20176	0.78022	0.42215	0.83219	0.24906	0.22132	0.3376	0.8299	0.46537	0.80391	0.40578	0.37827	0.55876	0.38367	0.36848	0.72445	0.48397	0.65227	0.83501	0.36183	0.71073	0.2847	0.19196	0.3912	0.23106	0.74301	0.28552	0.33209	0.48906	0.61178	0.54717	0.23437	0.56223	0.23961	0.70833	0.69575	0.17403	0.6555	0.5697	0.69099	0.22763
302	0.61601	0.64555	0.7291	0.27218	0.22531	0.32056	0.81075	0.73961	0.16706	0.72708	0.36885	0.81929	0.20749	0.18345	0.28838	0.82117	0.41049	0.81752	0.35313	0.32687	0.50128	0.33204	0.31758	0.66683	0.42849	0.5935	0.81805	0.31127	0.65264	0.23945	0.15903	0.33923	0.19181	0.68627	0.2402	0.28327	0.43338	0.66816	0.48992	0.19468	0.50468	0.19922	0.65017	0.63736	0.14474	0.59673	0.51197	0.74412	0.18884
303	0.55762	0.58708	0.67293	0.22737	0.18616	0.27177	0.80668	0.68408	0.13856	0.67085	0.31726	0.78678	0.17111	0.15147	0.24206	0.79143	0.35704	0.80472	0.30236	0.27768	0.44491	0.28254	0.26902	0.60855	0.37437	0.5353	0.78285	0.26316	0.59423	0.19838	0.13238	0.28929	0.15821	0.6283	0.19904	0.23745	0.37905	0.71706	0.43381	0.16055	0.44823	0.16428	0.59174	0.57892	0.1217	0.5385	0.45531	0.77776	0.15579
304	0.49992	0.52906	0.6155	0.18736	0.15312	0.22645	0.78144	0.62692	0.1166	0.61339	0.26813	0.74281	0.14119	0.12615	0.20008	0.74911	0.30549	0.77333	0.25433	0.23179	0.38981	0.23622	0.22399	0.55043	0.32197	0.47797	0.73723	0.21874	0.53617	0.16306	0.11214	0.24236	0.13125	0.5702	0.16361	0.1961	0.32639	0.75043	0.37903	0.13304	0.39304	0.1359	0.53369	0.52098	0.1046	0.4811	0.39986	0.78709	0.1294
305	0.44316	0.47178	0.5578	0.15367	0.12698	0.18617	0.74274	0.56929	0.10059	0.55569	0.22274	0.69244	0.11811	0.10726	0.16401	0.69972	0.25675	0.7307	0.21044	0.19075	0.33633	0.19459	0.18408	0.49289	0.27206	0.42169	0.68585	0.17961	0.47879	0.13455	0.097521	0.19994	0.1109	0.51247	0.13498	0.16078	0.27615	0.76344	0.32596	0.11219	0.33943	0.11426	0.47634	0.46383	0.092486	0.42475	0.34596	0.77433	0.10957
306	0.38758	0.41552	0.5004	0.12711	0.10755	0.15242	0.69614	0.51184	0.089412	0.49831	0.18266	0.63868	0.10131	0.093862	0.13499	0.64652	0.21221	0.68165	0.1723	0.15611	0.28515	0.15924	0.15075	0.4362	0.22589	0.36676	0.63148	0.14719	0.42237	0.113	0.087413	0.16361	0.096336	0.45548	0.11331	0.13253	0.22954	0.7562	0.27538	0.097221	0.28808	0.098645	0.41998	0.40773	0.084242	0.36972	0.2942	0.74519	0.095425
307	0.33365	0.36062	0.44368	0.10742	0.093808	0.12594	0.64501	0.45498	0.081919	0.44162	0.14937	0.58324	0.089608	0.084727	0.11308	0.5914	0.17351	0.629	0.14119	0.12874	0.23745	0.13112	0.1247	0.38071	0.18507	0.31373	0.5757	0.12204	0.36726	0.09754	0.080699	0.13447	0.086331	0.39952	0.097758	0.11132	0.18818	0.73273	0.22857	0.086911	0.24013	0.087847	0.36494	0.35307	0.078881	0.31654	0.2457	0.7054	0.085734
308	0.28215	0.3077	0.38801	0.093544	0.084462	0.10645	0.59143	0.39908	0.077124	0.386	0.12351	0.52718	0.081764	0.078747	0.097432	0.53549	0.14196	0.57451	0.11746	0.10844	0.19481	0.11016	0.10557	0.32691	0.15112	0.26353	0.51944	0.10369	0.31403	0.086917	0.076465	0.11257	0.079721	0.34504	0.087062	0.096226	0.15359	0.69785	0.18714	0.08008	0.19714	0.080661	0.31181	0.3005	0.075622	0.26614	0.20198	0.65915	0.079351
309	0.23435	0.2578	0.33391	0.084134	0.078353	0.092768	0.53665	0.34461	0.07429	0.33197	0.10461	0.47112	0.076736	0.075061	0.086699	0.47947	0.1179	0.5192	0.10036	0.094128	0.15883	0.095306	0.092176	0.27571	0.12469	0.2176	0.46331	0.0909	0.26367	0.079882	0.074035	0.096966	0.075582	0.29281	0.079976	0.085908	0.12654	0.65556	0.15263	0.075782	0.16073	0.076107	0.26161	0.25113	0.073894	0.21993	0.16469	0.60901	0.075376
310	0.1919	0.21242	0.28227	0.078001	0.074587	0.083532	0.48146	0.29239	0.072876	0.28044	0.091435	0.41557	0.073746	0.073034	0.079612	0.42387	0.10058	0.46377	0.088565	0.084426	0.13043	0.085207	0.083148	0.22845	0.10536	0.17762	0.4078	0.082315	0.21764	0.075453	0.072912	0.086306	0.073229	0.24402	0.075509	0.07912	0.10667	0.6086	0.12573	0.073314	0.13188	0.073457	0.21581	0.20652	0.073277	0.17958	0.1349	0.55667	0.073141
311	0.15634	0.17323	0.23439	0.074222	0.072503	0.077539	0.42648	0.24364	0.072485	0.23273	0.082607	0.36109	0.072219	0.072201	0.075152	0.36923	0.088682	0.40878	0.08074	0.0781	0.10942	0.078595	0.077302	0.18679	0.091912	0.14494	0.35346	0.076787	0.17761	0.072892	0.072731	0.079293	0.072161	0.20026	0.072921	0.074872	0.092803	0.5588	0.10607	0.072164	0.11046	0.072175	0.17607	0.16832	0.073462	0.14649	0.11264	0.50322	0.072158
312	0.12852	0.1415	0.19193	0.072133	0.071632	0.073863	0.37229	0.19996	0.072836	0.1905	0.076911	0.30844	0.07175	0.072231	0.072573	0.31628	0.080787	0.35484	0.075758	0.074186	0.094692	0.074477	0.073732	0.15224	0.0829	0.11999	0.30111	0.073444	0.14494	0.071678	0.073234	0.074889	0.072023	0.16316	0.071688	0.072446	0.083487	0.50736	0.092401	0.071966	0.095406	0.071881	0.14373	0.13768	0.07423	0.12114	0.096912	0.44939	0.072081
313	0.10812	0.11751	0.15646	0.07126	0.071637	0.071849	0.31964	0.16299	0.073724	0.1553	0.073448	0.25878	0.072045	0.072888	0.071349	0.2661	0.075758	0.30278	0.072807	0.072001	0.084753	0.072145	0.071794	0.12549	0.077075	0.10207	0.25194	0.071668	0.12005	0.071436	0.074232	0.072352	0.072557	0.13377	0.071432	0.071331	0.077446	0.45514	0.083237	0.072457	0.085229	0.072304	0.11916	0.11473	0.075422	0.10288	0.086238	0.39584	0.072659
314	0.093904	0.10042	0.12878	0.071265	0.072276	0.071033	0.2696	0.13375	0.075002	0.12791	0.071589	0.21365	0.072893	0.073997	0.0711	0.2202	0.072775	0.2538	0.071316	0.071061	0.078274	0.0711	0.071032	0.10605	0.073524	0.089769	0.20756	0.071023	0.1022	0.071896	0.075591	0.071158	0.073577	0.11198	0.071881	0.071161	0.073741	0.40284	0.07731	0.073447	0.078578	0.073243	0.10157	0.098487	0.076923	0.09032	0.079235	0.34327	0.073712
315	0.084357	0.088738	0.10853	0.071903	0.07337	0.071079	0.22368	0.1121	0.076561	0.10792	0.070886	0.17474	0.074139	0.075434	0.071556	0.18027	0.071264	0.20951	0.070877	0.071019	0.074259	0.070982	0.071117	0.09259	0.071604	0.081603	0.16963	0.071193	0.089961	0.072862	0.07721	0.070934	0.074949	0.096679	0.07284	0.071673	0.071712	0.3512	0.073689	0.074796	0.074442	0.074556	0.089528	0.087446	0.078648	0.08197	0.074847	0.29264	0.075107
316	0.078175	0.081033	0.094434	0.072998	0.074795	0.07175	0.18356	0.096897	0.078327	0.094016	0.071018	0.14329	0.075674	0.077108	0.07252	0.14765	0.070817	0.17156	0.071199	0.071626	0.072017	0.071534	0.071816	0.083599	0.070864	0.076402	0.13927	0.071952	0.08185	0.074194	0.07902	0.07141	0.076576	0.086338	0.074166	0.072678	0.070893	0.30118	0.07173	0.076406	0.072113	0.07614	0.081561	0.080198	0.08054	0.076639	0.072339	0.24528	0.076751
317	0.074385	0.076162	0.084995	0.074421	0.076457	0.072866	0.15061	0.086646	0.080242	0.08472	0.071748	0.11952	0.077417	0.078954	0.073848	0.12276	0.071131	0.14109	0.072065	0.072697	0.071043	0.072565	0.072952	0.077816	0.070968	0.073311	0.11654	0.073133	0.076691	0.075788	0.08097	0.072386	0.078387	0.079597	0.075757	0.074035	0.07094	0.25403	0.070958	0.078204	0.071076	0.077919	0.076504	0.075651	0.082555	0.073455	0.071174	0.2028	0.078574
318	0.072302	0.073307	0.078898	0.07608	0.078291	0.074303	0.12532	0.079971	0.082269	0.078725	0.072906	0.10259	0.07931	0.080927	0.075438	0.10488	0.07199	0.11821	0.073321	0.0741	0.070978	0.073941	0.074404	0.074313	0.071676	0.071729	0.10046	0.074616	0.073631	0.077572	0.083025	0.073722	0.080332	0.075412	0.077538	0.075647	0.071608	0.21131	0.07104	0.08014	0.070966	0.07984	0.073517	0.073028	0.084664	0.071806	0.070972	0.16677	0.080529
319	0.071444	0.071896	0.075173	0.077908	0.08025	0.07597	0.10706	0.075836	0.084381	0.075072	0.074372	0.091044	0.081315	0.082994	0.077216	0.09262	0.073241	0.10199	0.074858	0.075744	0.071567	0.075564	0.076081	0.072438	0.072819	0.071229	0.089563	0.076316	0.072073	0.079493	0.08516	0.075316	0.082377	0.07305	0.079457	0.07744	0.072721	0.1746	0.071732	0.082178	0.071522	0.081866	0.072012	0.071784	0.086847	0.071259	0.071462	0.13816	0.082582
320	0.071464	0.071519	0.07314	0.079859	0.082301	0.077802	0.094502	0.07351	0.086559	0.073092	0.076059	0.083448	0.083403	0.085133	0.079129	0.084509	0.074773	0.090966	0.076595	0.077558	0.072622	0.077364	0.077921	0.071729	0.074272	0.071505	0.082427	0.078173	0.071592	0.081515	0.087359	0.077096	0.084498	0.071993	0.081477	0.079366	0.074154	0.14501	0.072862	0.084293	0.072554	0.083971	0.071568	0.071526	0.089092	0.071501	0.072447	0.11688	0.084709
321	0.072112	0.071884	0.072321	0.0819	0.084421	0.079753	0.086162	0.072481	0.088792	0.07231	0.077903	0.078661	0.085554	0.08733	0.081142	0.079356	0.076505	0.083739	0.078477	0.079497	0.074012	0.079291	0.079879	0.071856	0.075948	0.072337	0.077968	0.080143	0.071882	0.083612	0.089613	0.079008	0.086678	0.07187	0.083573	0.081388	0.075814	0.12266	0.074306	0.086468	0.073928	0.086138	0.071884	0.071976	0.091391	0.072308	0.073787	0.10189	0.086895
322	0.073211	0.07278	0.072372	0.084009	0.086597	0.081792	0.080859	0.072382	0.091073	0.072387	0.079862	0.075884	0.087757	0.089575	0.083228	0.076318	0.078381	0.079228	0.080463	0.081526	0.075642	0.081312	0.081922	0.072583	0.077784	0.073567	0.075424	0.082195	0.072725	0.085767	0.091914	0.081018	0.088908	0.072419	0.085727	0.083482	0.077639	0.1067	0.075974	0.088693	0.075546	0.088355	0.072746	0.072934	0.093739	0.073521	0.07538	0.091749	0.089129
323	0.074631	0.074055	0.073043	0.08617	0.088817	0.083896	0.077714	0.072946	0.093397	0.073077	0.081903	0.074537	0.090003	0.091863	0.08537	0.074785	0.080361	0.076645	0.082526	0.083622	0.077442	0.083402	0.084029	0.073736	0.079734	0.075081	0.074243	0.08431	0.073961	0.087969	0.094259	0.083098	0.091181	0.073445	0.087928	0.08563	0.07958	0.095803	0.077802	0.09096	0.077338	0.090615	0.073996	0.074252	0.096135	0.075022	0.077155	0.08516	0.091407
324	0.076279	0.0756	0.074155	0.088373	0.091076	0.086049	0.076105	0.073982	0.095764	0.074203	0.084006	0.07421	0.092289	0.094191	0.087556	0.074325	0.082416	0.075437	0.084645	0.085769	0.079365	0.085544	0.086186	0.075194	0.081766	0.076796	0.074034	0.086473	0.075478	0.09021	0.096649	0.085232	0.093493	0.074811	0.090169	0.087822	0.081606	0.088659	0.079744	0.093268	0.079254	0.092914	0.075523	0.075827	0.09858	0.076728	0.079058	0.081103	0.093724
325	0.07809	0.077336	0.075582	0.090612	0.093372	0.088242	0.075591	0.075354	0.098174	0.07564	0.086156	0.07461	0.094611	0.096559	0.089779	0.07463	0.084526	0.075209	0.086809	0.087956	0.081374	0.087727	0.088382	0.076867	0.083859	0.078656	0.074518	0.088675	0.077194	0.092488	0.099084	0.087409	0.095844	0.07642	0.092446	0.090051	0.083694	0.084202	0.081768	0.095613	0.08126	0.095251	0.077246	0.077586	0.10108	0.078581	0.081053	0.078843	0.09608
326	0.080016	0.079208	0.077233	0.092885	0.095702	0.090469	0.075857	0.076966	0.10063	0.077297	0.088343	0.075526	0.09697	0.098968	0.092035	0.07548	0.08668	0.075678	0.089009	0.090178	0.083448	0.089945	0.090612	0.078695	0.085998	0.080617	0.075495	0.090911	0.079052	0.094799	0.10157	0.089621	0.098234	0.078201	0.094757	0.092314	0.085828	0.081659	0.083852	0.097998	0.08333	0.097627	0.079109	0.079474	0.10363	0.080538	0.083116	0.077865	0.098476
327	0.082025	0.081178	0.079042	0.095189	0.098069	0.092727	0.076678	0.078748	0.10313	0.079111	0.090562	0.076811	0.099368	0.10142	0.094323	0.076716	0.088869	0.076644	0.091241	0.092431	0.085569	0.092194	0.092874	0.080632	0.088174	0.082653	0.076823	0.093177	0.081012	0.097145	0.1041	0.091864	0.10067	0.080104	0.097102	0.094608	0.088	0.08048	0.085982	0.10042	0.085449	0.10004	0.081072	0.081455	0.10624	0.08257	0.085228	0.077801	0.10091
328	0.084095	0.083219	0.080966	0.097526	0.10047	0.095015	0.077897	0.080652	0.10569	0.081039	0.092811	0.078361	0.10181	0.10392	0.096641	0.078232	0.091087	0.077967	0.093501	0.094714	0.087728	0.094473	0.095165	0.082649	0.090381	0.084744	0.078403	0.095474	0.083045	0.099528	0.10669	0.094137	0.10314	0.082096	0.099484	0.096934	0.090203	0.080283	0.088148	0.10289	0.087605	0.1025	0.083108	0.083504	0.10891	0.084658	0.08738	0.078393	0.1034
329	0.086211	0.085312	0.082971	0.099896	0.10292	0.097333	0.079396	0.082642	0.1083	0.083046	0.095088	0.080095	0.10429	0.10647	0.098993	0.079942	0.093333	0.079539	0.09579	0.097026	0.089918	0.096781	0.097486	0.084722	0.092615	0.086875	0.080159	0.097802	0.085131	0.10195	0.10934	0.096438	0.10567	0.084151	0.1019	0.099293	0.092433	0.080773	0.090344	0.10541	0.089793	0.10501	0.085197	0.085603	0.11166	0.086787	0.089562	0.079445	0.10593
330	0.088361	0.087443	0.085034	0.1023	0.10541	0.099683	0.081092	0.084694	0.11098	0.085111	0.097392	0.08196	0.10682	0.10908	0.10138	0.081789	0.095606	0.081287	0.098108	0.099369	0.092134	0.09912	0.099839	0.086839	0.094875	0.089039	0.082041	0.10016	0.087257	0.10441	0.11207	0.09877	0.10825	0.086253	0.10437	0.10169	0.09469	0.081747	0.092565	0.10798	0.092007	0.10756	0.087325	0.087739	0.11449	0.088948	0.091772	0.080821	0.10852
331	0.090539	0.089605	0.087141	0.10475	0.10795	0.10207	0.082928	0.086793	0.11373	0.087219	0.099727	0.083919	0.10941	0.11175	0.1038	0.083736	0.097906	0.083162	0.10046	0.10175	0.094375	0.10149	0.10223	0.088988	0.097162	0.09123	0.084011	0.10256	0.089415	0.10692	0.11487	0.10113	0.11089	0.088391	0.10687	0.10412	0.096972	0.083067	0.094812	0.11061	0.094247	0.11018	0.089484	0.089905	0.11741	0.091137	0.094006	0.082427	0.11117
332	0.092742	0.091794	0.089281	0.10724	0.11054	0.10449	0.084866	0.088926	0.11656	0.089361	0.10209	0.085946	0.11206	0.11449	0.10627	0.085753	0.10023	0.085127	0.10284	0.10416	0.096641	0.1039	0.10465	0.091165	0.099476	0.093445	0.086047	0.10499	0.0916	0.10948	0.11775	0.10353	0.11359	0.090558	0.10943	0.10659	0.099282	0.084633	0.097083	0.1133	0.096511	0.11285	0.09167	0.092098	0.12044	0.093351	0.096265	0.084199	0.11388
333	0.094969	0.094006	0.09145	0.10978	0.11319	0.10695	0.086876	0.091089	0.11948	0.09153	0.10449	0.088024	0.11477	0.11731	0.10877	0.087824	0.10259	0.087158	0.10526	0.10661	0.098932	0.10634	0.10712	0.093367	0.10182	0.095684	0.088131	0.10746	0.093808	0.11209	0.12074	0.10597	0.11637	0.092749	0.11204	0.10912	0.10162	0.086377	0.09938	0.11607	0.0988	0.1156	0.09388	0.094313	0.12358	0.095588	0.098548	0.086089	0.11667
334	0.09722	0.096242	0.093644	0.11237	0.11591	0.10945	0.088945	0.093278	0.12251	0.093725	0.10693	0.090143	0.11756	0.12022	0.11133	0.089937	0.10499	0.089241	0.10772	0.1091	0.10125	0.10883	0.10963	0.095592	0.1042	0.097946	0.090255	0.10998	0.09604	0.11477	0.12383	0.10845	0.11923	0.094965	0.11472	0.11169	0.10399	0.088254	0.10171	0.11892	0.10112	0.11843	0.096113	0.096552	0.12685	0.097848	0.10086	0.088071	0.11955
335	0.099493	0.0985	0.095859	0.11502	0.11871	0.112	0.091051	0.095488	0.12564	0.095941	0.10941	0.09229	0.12042	0.12322	0.11395	0.09208	0.10742	0.09136	0.11022	0.11165	0.1036	0.11137	0.11219	0.097838	0.10661	0.10023	0.092407	0.11255	0.098294	0.11752	0.12705	0.11097	0.12218	0.097202	0.11747	0.11432	0.10639	0.090218	0.10406	0.12185	0.10346	0.12134	0.098368	0.098814	0.13027	0.10013	0.1032	0.090111	0.12252
336	0.10179	0.10078	0.098097	0.11774	0.12158	0.11461	0.09319	0.097721	0.12891	0.09818	0.11194	0.094463	0.12339	0.12634	0.11663	0.094249	0.10989	0.093509	0.11277	0.11424	0.10598	0.11396	0.1148	0.10011	0.10906	0.10255	0.094584	0.11518	0.10057	0.12034	0.1304	0.11355	0.12524	0.099462	0.12029	0.11701	0.10884	0.092248	0.10645	0.12489	0.10584	0.12435	0.10065	0.1011	0.13387	0.10244	0.10557	0.092199	0.12559
337	0.10412	0.10309	0.10036	0.12053	0.12455	0.11728	0.095356	0.099976	0.13232	0.10044	0.11452	0.096659	0.12645	0.12958	0.11937	0.096441	0.1124	0.095683	0.11537	0.1169	0.10839	0.1166	0.11748	0.1024	0.11155	0.10489	0.096783	0.11787	0.10287	0.12325	0.13392	0.11618	0.12841	0.10175	0.1232	0.11977	0.11132	0.094329	0.10887	0.12805	0.10825	0.12747	0.10295	0.10341	0.13766	0.10478	0.10797	0.094323	0.12878
338	0.10647	0.10543	0.10264	0.1234	0.12763	0.12002	0.097545	0.10225	0.13589	0.10272	0.11715	0.098876	0.12964	0.13296	0.12219	0.098655	0.11496	0.09788	0.11804	0.11962	0.11084	0.11932	0.12022	0.10472	0.11409	0.10726	0.099004	0.12063	0.1052	0.12626	0.13762	0.11888	0.13172	0.10406	0.1262	0.12261	0.11385	0.096446	0.11133	0.13133	0.1107	0.13072	0.10528	0.10575	0.14168	0.10715	0.11041	0.096475	0.13211
339	0.10886	0.10779	0.10495	0.12636	0.13082	0.12283	0.099758	0.10456	0.13966	0.10504	0.11985	0.10112	0.13295	0.1365	0.12509	0.10089	0.11758	0.1001	0.12077	0.12241	0.11334	0.1221	0.12304	0.10707	0.11668	0.10967	0.10125	0.12347	0.10756	0.12937	0.14153	0.12164	0.13517	0.10639	0.12931	0.12554	0.11643	0.098598	0.11384	0.13476	0.11319	0.1341	0.10765	0.10812	0.14597	0.10955	0.11289	0.098655	0.13559
340	0.11128	0.11019	0.10729	0.12943	0.13414	0.12572	0.10199	0.10689	0.14365	0.10737	0.12261	0.10338	0.13641	0.14022	0.12809	0.10315	0.12026	0.10234	0.12357	0.12529	0.11588	0.12496	0.12595	0.10946	0.11933	0.11211	0.10351	0.12639	0.10996	0.13261	0.14569	0.12448	0.1388	0.10876	0.13254	0.12857	0.11907	0.10078	0.11639	0.13835	0.11573	0.13765	0.11004	0.11053	0.15058	0.112	0.11542	0.10086	0.13925
341	0.11374	0.11263	0.10966	0.1326	0.13761	0.1287	0.10425	0.10925	0.14789	0.10974	0.12546	0.10567	0.14005	0.14416	0.1312	0.10543	0.12301	0.10461	0.12645	0.12825	0.11848	0.12791	0.12894	0.11187	0.12204	0.1146	0.10581	0.12941	0.11239	0.13598	0.15013	0.12741	0.14261	0.11116	0.13591	0.1317	0.12177	0.10299	0.119	0.14213	0.11832	0.14138	0.11247	0.11297	0.15555	0.11448	0.118	0.10309	0.1431
342	0.11625	0.1151	0.11206	0.13591	0.14126	0.13179	0.10654	0.11164	0.15246	0.11215	0.12839	0.10798	0.14389	0.14836	0.13442	0.10775	0.12583	0.1069	0.12943	0.13132	0.12113	0.13096	0.13205	0.11433	0.12482	0.11713	0.10812	0.13254	0.11486	0.13951	0.15494	0.13043	0.14667	0.1136	0.13944	0.13496	0.12454	0.10522	0.12167	0.14615	0.12097	0.14533	0.11494	0.11545	0.16103	0.117	0.12064	0.10534	0.1472
343	0.1188	0.11763	0.1145	0.13936	0.14511	0.13499	0.10885	0.11407	0.15738	0.11459	0.13141	0.11033	0.14795	0.15284	0.13778	0.11008	0.12873	0.10922	0.13251	0.1345	0.12385	0.13412	0.13527	0.11683	0.12768	0.11971	0.11047	0.13578	0.11737	0.14322	0.16016	0.13357	0.15099	0.11608	0.14315	0.13835	0.12738	0.10749	0.1244	0.15042	0.12368	0.14952	0.11746	0.11798	0.16706	0.11958	0.12333	0.10762	0.15157
344	0.12141	0.12019	0.11698	0.14298	0.14917	0.13832	0.11118	0.11654	0.16271	0.11707	0.13454	0.1127	0.15226	0.15764	0.14128	0.11245	0.13173	0.11157	0.13569	0.1378	0.12663	0.1374	0.13861	0.11937	0.13063	0.12234	0.11285	0.13916	0.11993	0.14713	0.16583	0.13682	0.1556	0.1186	0.14705	0.1419	0.13031	0.10977	0.1272	0.15498	0.12646	0.15399	0.12002	0.12056	0.17372	0.12221	0.12609	0.10993	0.15623
345	0.12407	0.12282	0.1195	0.14678	0.15349	0.1418	0.11355	0.11905	0.16858	0.11959	0.13779	0.11511	0.15689	0.16287	0.14496	0.11486	0.13482	0.11394	0.13901	0.14124	0.12949	0.14082	0.14211	0.12197	0.13367	0.12504	0.11526	0.1427	0.12254	0.15128	0.17214	0.1402	0.16059	0.12118	0.15119	0.14563	0.13333	0.11209	0.13008	0.1599	0.12931	0.1588	0.12264	0.12319	0.18131	0.1249	0.12893	0.11226	0.16129
346	0.12679	0.1255	0.12207	0.15078	0.15811	0.14543	0.11596	0.12161	0.17505	0.12216	0.14117	0.11755	0.16187	0.16855	0.14882	0.11729	0.13803	0.11636	0.14246	0.14484	0.13243	0.1444	0.14577	0.12462	0.13681	0.1278	0.11771	0.1464	0.12521	0.15568	0.17915	0.14373	0.16599	0.1238	0.15559	0.14955	0.13645	0.11443	0.13305	0.16522	0.13225	0.164	0.12531	0.12588	0.18993	0.12766	0.13184	0.11462	0.16678
347	0.12959	0.12824	0.12469	0.15504	0.16309	0.14926	0.11839	0.12422	0.18231	0.12479	0.14469	0.12004	0.16727	0.17482	0.15291	0.11977	0.14136	0.11881	0.14607	0.14862	0.13547	0.14815	0.14962	0.12733	0.14007	0.13064	0.12021	0.1503	0.12794	0.16041	0.18711	0.14744	0.17192	0.12649	0.1603	0.15371	0.13969	0.1168	0.13611	0.17104	0.13528	0.16967	0.12805	0.12863	0.20001	0.13049	0.13485	0.11702	0.1728
348	0.13246	0.13106	0.12737	0.15957	0.16847	0.15329	0.12087	0.12689	0.19053	0.12747	0.14838	0.12257	0.17317	0.1818	0.15725	0.12229	0.14483	0.1213	0.14986	0.1526	0.13861	0.1521	0.15369	0.1301	0.14347	0.13355	0.12274	0.15441	0.13075	0.16549	0.19622	0.15133	0.17847	0.12923	0.16538	0.15812	0.14306	0.11921	0.13927	0.17746	0.13841	0.17589	0.13086	0.13146	0.21192	0.13339	0.13796	0.11945	0.17947
349	0.13541	0.13395	0.13012	0.16443	0.17437	0.15757	0.12339	0.12962	0.20003	0.13022	0.15227	0.12514	0.17971	0.18968	0.16188	0.12486	0.14846	0.12383	0.15386	0.15682	0.14187	0.15628	0.158	0.13296	0.14701	0.13656	0.12533	0.15879	0.13362	0.17102	0.20691	0.15545	0.1858	0.13205	0.1709	0.16285	0.14657	0.12166	0.14256	0.18464	0.14166	0.18283	0.13374	0.13436	0.22651	0.13639	0.14117	0.12192	0.18697
350	0.13845	0.13693	0.13293	0.16969	0.18087	0.16212	0.12596	0.13242	0.21117	0.13304	0.15637	0.12777	0.187	0.1987	0.16686	0.12748	0.15227	0.12641	0.15809	0.16131	0.14525	0.16072	0.1626	0.13589	0.15072	0.13966	0.12796	0.16347	0.13658	0.17708	0.21966	0.15982	0.19411	0.13494	0.17694	0.16794	0.15024	0.12414	0.14598	0.19276	0.14504	0.19064	0.1367	0.13735	0.24473	0.13948	0.14452	0.12444	0.19548
351	0.14159	0.14	0.13582	0.17541	0.18813	0.16701	0.12858	0.13529	0.22456	0.13593	0.16072	0.13046	0.19527	0.20921	0.17225	0.13016	0.15628	0.12905	0.16259	0.16612	0.14878	0.16548	0.16754	0.13891	0.15462	0.14287	0.13066	0.16849	0.13964	0.18378	0.23529	0.16449	0.20369	0.13792	0.18363	0.17347	0.1541	0.12667	0.14954	0.20207	0.14855	0.19956	0.13976	0.14044	0.26836	0.14268	0.14799	0.12699	0.20532
352	0.14485	0.14318	0.13879	0.18168	0.19633	0.17228	0.13125	0.13824	0.24103	0.1389	0.16536	0.1332	0.20476	0.22168	0.17812	0.1329	0.16052	0.13174	0.1674	0.1713	0.15247	0.17059	0.17288	0.14203	0.15873	0.1462	0.13342	0.17393	0.14279	0.19128	0.255	0.1695	0.21492	0.14099	0.1911	0.17951	0.15816	0.12925	0.15328	0.21295	0.15223	0.20991	0.14293	0.14363	0.3002	0.146	0.15163	0.1296	0.2169
353	0.14823	0.14647	0.14186	0.18864	0.20573	0.17801	0.13398	0.14128	0.26192	0.14197	0.17033	0.13602	0.21585	0.23684	0.18459	0.1357	0.16504	0.13449	0.17259	0.17691	0.15634	0.17613	0.17868	0.14525	0.16308	0.14966	0.13624	0.17986	0.14606	0.19977	0.2807	0.17492	0.22835	0.14417	0.19957	0.18617	0.16246	0.13187	0.1572	0.22591	0.15608	0.22215	0.1462	0.14694	0.34498	0.14945	0.15543	0.13226	0.23082
354	0.15175	0.14989	0.14502	0.19643	0.21667	0.18429	0.13678	0.14442	0.2893	0.14514	0.17569	0.13891	0.22907	0.25576	0.19177	0.13858	0.16986	0.13731	0.1782	0.18305	0.16042	0.18218	0.18505	0.1486	0.16773	0.15328	0.13914	0.18639	0.14945	0.20953	0.31548	0.18082	0.24481	0.14746	0.20929	0.1936	0.16704	0.13455	0.16133	0.2417	0.16015	0.23696	0.1496	0.15038	0.41075	0.15304	0.15944	0.13498	0.24797
355	0.15543	0.15345	0.1483	0.20528	0.22967	0.19123	0.13965	0.14767	0.32659	0.14842	0.18153	0.14187	0.2452	0.28011	0.19983	0.14153	0.17504	0.14021	0.18434	0.18983	0.16473	0.18884	0.19211	0.15207	0.17269	0.15706	0.14212	0.19364	0.15298	0.22094	0.36458	0.1873	0.26556	0.15087	0.22065	0.20199	0.17193	0.13729	0.16571	0.26149	0.16444	0.25533	0.15314	0.15396	0.51063	0.15681	0.16367	0.13776	0.26971
356	0.15927	0.15717	0.15169	0.21548	0.24547	0.19899	0.1426	0.15103	0.37962	0.15182	0.18792	0.14493	0.26544	0.31263	0.20902	0.14457	0.18064	0.14318	0.1911	0.19738	0.16932	0.19626	0.20002	0.1557	0.17805	0.16103	0.1452	0.20179	0.15666	0.23455	0.43689	0.19448	0.29259	0.15442	0.2342	0.21159	0.17719	0.14009	0.17036	0.28709	0.169	0.27882	0.15683	0.15771	0.66079	0.16075	0.16815	0.14061	0.29824
357	0.16332	0.16106	0.15523	0.22744	0.26516	0.20778	0.14563	0.15453	0.45788	0.15536	0.19499	0.14808	0.29161	0.35774	0.21964	0.14771	0.18676	0.14624	0.19863	0.20589	0.17421	0.2046	0.20899	0.15949	0.18385	0.16521	0.14836	0.21106	0.16052	0.25116	0.54598	0.20254	0.32911	0.15813	0.25072	0.22275	0.18289	0.14296	0.17534	0.32139	0.17387	0.3099	0.1607	0.16163	0.85539	0.16491	0.17293	0.14354	0.33708
358	0.16758	0.16516	0.15891	0.24173	0.29046	0.21786	0.14875	0.15818	0.57534	0.15905	0.20289	0.15134	0.32669	0.42284	0.23213	0.15095	0.19347	0.1494	0.20711	0.21563	0.17947	0.21411	0.21931	0.16347	0.1902	0.16964	0.15164	0.22179	0.16457	0.27197	0.70497	0.21169	0.38041	0.16201	0.27141	0.23597	0.1891	0.1459	0.1807	0.36917	0.17909	0.35259	0.16477	0.16576	1.0128	0.16931	0.17804	0.14654	0.39209
359	0.1721	0.16949	0.16277	0.25922	0.32409	0.22962	0.15197	0.16199	0.74143	0.16291	0.21183	0.15471	0.37548	0.51937	0.24713	0.1543	0.20093	0.15265	0.21678	0.22694	0.18515	0.22513	0.23139	0.16765	0.1972	0.17434	0.15504	0.2344	0.16884	0.29886	0.89314	0.22223	0.4551	0.16609	0.29812	0.25198	0.19593	0.14893	0.1865	0.43823	0.18473	0.41351	0.16906	0.17012	1.0542	0.17399	0.18356	0.14963	0.4727
360	0.17691	0.17407	0.16681	0.28118	0.37041	0.2436	0.15531	0.16598	0.92249	0.16696	0.22208	0.15821	0.44578	0.66004	0.26557	0.15778	0.20929	0.15603	0.22799	0.24031	0.19133	0.23811	0.2458	0.17207	0.205	0.17937	0.15856	0.24953	0.17336	0.33478	1.0213	0.23458	0.56552	0.1704	0.33376	0.27183	0.20352	0.15204	0.19282	0.54019	0.19087	0.50293	0.1736	0.17475	1.023	0.17897	0.18955	0.15282	0.59175
361	0.18206	0.17895	0.17107	0.30959	0.43645	0.26058	0.15876	0.17018	1.0275	0.17123	0.23403	0.16185	0.54889	0.83695	0.28884	0.16139	0.21879	0.15953	0.2412	0.25645	0.19812	0.25372	0.26338	0.17677	0.21378	0.18477	0.16223	0.26811	0.17817	0.38449	1.0406	0.24933	0.72059	0.17495	0.38304	0.29716	0.21205	0.15524	0.19978	0.68601	0.1976	0.63314	0.17844	0.17968	0.96868	0.18433	0.19609	0.15611	0.75497
362	0.18759	0.18418	0.17557	0.34756	0.5325	0.28171	0.16235	0.17461	1.0313	0.17574	0.24821	0.16565	0.69439	0.98295	0.3191	0.16516	0.22974	0.16317	0.25708	0.27639	0.20563	0.27293	0.28536	0.18178	0.2238	0.1906	0.16606	0.29153	0.18331	0.45549	1.0029	0.26733	0.89445	0.17979	0.45336	0.33049	0.22173	0.15855	0.20751	0.8605	0.20505	0.80204	0.1836	0.18496	0.90784	0.19011	0.20331	0.15952	0.92468
363	0.19358	0.1898	0.18035	0.4	0.66841	0.30873	0.16608	0.17931	0.98892	0.18053	0.26538	0.16963	0.86459	1.0293	0.35973	0.1691	0.24255	0.16696	0.27662	0.30171	0.21404	0.29717	0.31363	0.18714	0.2354	0.19696	0.17007	0.32191	0.18884	0.55817	0.94699	0.28987	1.0069	0.18497	0.55508	0.37581	0.2329	0.16198	0.21618	0.99118	0.21337	0.95596	0.18916	0.19065	0.84638	0.1964	0.21135	0.16305	1.0177
364	0.20011	0.1959	0.18544	0.47439	0.83334	0.34437	0.16998	0.18432	0.93166	0.18563	0.28667	0.1738	0.98823	1.0039	0.41601	0.17324	0.25784	0.17092	0.30128	0.33479	0.22355	0.32869	0.35113	0.19293	0.24905	0.20393	0.17428	0.36258	0.19481	0.70003	0.88596	0.31887	1.0215	0.19053	0.69595	0.43933	0.24599	0.16552	0.22602	1.0233	0.22278	1.0202	0.19517	0.19681	0.78615	0.20329	0.2204	0.16671	1.0178
365	0.20729	0.20254	0.1909	0.58027	0.96636	0.3928	0.17406	0.18968	0.87046	0.19111	0.31379	0.17818	1.0167	0.95264	0.49576	0.17758	0.27646	0.17507	0.33329	0.37938	0.23446	0.37091	0.40241	0.1992	0.26545	0.21164	0.17872	0.41869	0.20131	0.86168	0.82459	0.35732	0.98425	0.19654	0.85771	0.52982	0.2616	0.16921	0.23736	0.99287	0.23356	1.0049	0.20172	0.20355	0.72786	0.21091	0.23071	0.17053	0.97525
366	0.21525	0.20985	0.19678	0.72165	1.0099	0.46038	0.17834	0.19544	0.80922	0.19701	0.34931	0.18282	0.98562	0.89295	0.60794	0.18217	0.29968	0.17944	0.37609	0.44115	0.24716	0.42913	0.47427	0.20607	0.28556	0.22025	0.18341	0.49773	0.20844	0.97724	0.76447	0.40983	0.92911	0.20308	0.97529	0.65533	0.28063	0.17304	0.25062	0.9401	0.24609	0.95734	0.20891	0.21097	0.67174	0.2194	0.24264	0.17452	0.91831
367	0.22416	0.21796	0.20317	0.87342	0.98661	0.55536	0.18286	0.20168	0.74932	0.20341	0.39718	0.18774	0.93295	0.83157	0.75247	0.18703	0.32939	0.18405	0.43488	0.52793	0.2622	0.51079	0.57516	0.21363	0.31082	0.23	0.18839	0.6081	0.21634	1.0041	0.70622	0.48311	0.86853	0.21025	1.0042	0.80726	0.30435	0.17703	0.2664	0.88014	0.2609	0.89897	0.21688	0.21921	0.61781	0.22899	0.25665	0.17869	0.85734
368	0.23425	0.22705	0.21014	0.97285	0.93707	0.68306	0.18763	0.20848	0.69127	0.2104	0.4632	0.19297	0.87315	0.77082	0.89583	0.19221	0.36847	0.18893	0.51684	0.6467	0.28036	0.62351	0.70867	0.22204	0.34339	0.24114	0.1937	0.74931	0.22516	0.97407	0.65003	0.58515	0.80724	0.21818	0.97513	0.93656	0.3347	0.18121	0.28556	0.81882	0.27876	0.83782	0.22578	0.22847	0.56594	0.23995	0.27341	0.18308	0.79614
369	0.24582	0.23736	0.21782	0.99026	0.87837	0.82836	0.19269	0.21594	0.63523	0.21811	0.55471	0.19858	0.8119	0.71159	0.97721	0.19774	0.4212	0.19412	0.62881	0.79003	0.30276	0.76397	0.85342	0.23149	0.38653	0.25409	0.19939	0.8892	0.23512	0.92236	0.59589	0.7179	0.7469	0.22703	0.92376	0.98891	0.37455	0.1856	0.30935	0.75819	0.30073	0.77682	0.23585	0.23898	0.51588	0.25264	0.29387	0.18769	0.7361
370	0.2593	0.24919	0.22634	0.95776	0.81732	0.94048	0.19808	0.22421	0.58118	0.22667	0.67607	0.20461	0.75127	0.65422	0.98157	0.20368	0.49351	0.19966	0.76636	0.91595	0.33105	0.89689	0.95425	0.24223	0.44494	0.26936	0.20552	0.96998	0.24651	0.86313	0.54364	0.85805	0.68818	0.23702	0.86463	0.97381	0.42814	0.19021	0.3396	0.69909	0.32841	0.71712	0.24739	0.25107	0.46734	0.26758	0.31942	0.19257	0.67777
371	0.27524	0.26297	0.23591	0.90576	0.75649	0.97768	0.20386	0.23346	0.52892	0.23628	0.81365	0.21114	0.69208	0.59876	0.94416	0.21011	0.59178	0.20562	0.89429	0.97337	0.36763	0.96798	0.97844	0.25459	0.52482	0.2877	0.21217	0.97598	0.25972	0.80209	0.49304	0.95203	0.63132	0.24842	0.8036	0.92852	0.50123	0.19507	0.379	0.64179	0.36413	0.65913	0.26078	0.26519	0.42004	0.28547	0.35207	0.19775	0.62132
372	0.29444	0.27928	0.24676	0.84674	0.69688	0.95663	0.21008	0.24392	0.47823	0.24718	0.9228	0.21825	0.63464	0.54511	0.89059	0.2171	0.71602	0.21204	0.96171	0.96425	0.41604	0.9683	0.95069	0.26904	0.63125	0.31018	0.21943	0.93989	0.27527	0.74142	0.44383	0.97192	0.5763	0.26163	0.74291	0.87188	0.59959	0.20022	0.43144	0.58635	0.41129	0.60298	0.27657	0.28194	0.37376	0.30732	0.39479	0.20326	0.56671
373	0.31802	0.29893	0.25923	0.78592	0.63889	0.90984	0.21681	0.25588	0.42885	0.25971	0.96372	0.22606	0.57898	0.49306	0.83119	0.22475	0.84413	0.21902	0.96135	0.92233	0.48107	0.93036	0.90119	0.2862	0.75855	0.33831	0.22741	0.88707	0.29391	0.68201	0.39577	0.94296	0.523	0.27714	0.68347	0.81157	0.72186	0.2057	0.50205	0.53264	0.47458	0.5486	0.29553	0.30218	0.32848	0.33458	0.45174	0.20916	0.51378
374	0.3476	0.32307	0.27374	0.72537	0.58261	0.85305	0.22414	0.26974	0.38059	0.27431	0.94706	0.23469	0.525	0.44239	0.77041	0.2332	0.93092	0.22664	0.92372	0.86747	0.56794	0.87709	0.84337	0.30694	0.87587	0.37429	0.23626	0.82806	0.31665	0.6242	0.34878	0.89333	0.47119	0.29567	0.62561	0.75077	0.84518	0.21154	0.59571	0.48047	0.55925	0.49581	0.31872	0.32713	0.28448	0.36932	0.52803	0.21551	0.46232
375	0.38545	0.35332	0.2909	0.66595	0.52796	0.79294	0.23218	0.28604	0.33347	0.29158	0.90296	0.24431	0.4725	0.39292	0.71004	0.2426	0.95181	0.23505	0.87088	0.80793	0.67788	0.81807	0.78299	0.33248	0.94019	0.42118	0.24616	0.76743	0.34495	0.56804	0.30302	0.83565	0.42067	0.31821	0.5694	0.69077	0.92647	0.21781	0.71094	0.42962	0.66721	0.4444	0.34764	0.35848	0.24247	0.41447	0.62736	0.22237	0.41211
376	0.43475	0.39198	0.31153	0.608	0.47479	0.73235	0.24108	0.30553	0.28779	0.31235	0.84767	0.25516	0.4213	0.34462	0.65083	0.25317	0.92604	0.24438	0.81217	0.74735	0.7971	0.75755	0.72246	0.36458	0.94285	0.48304	0.25735	0.70706	0.38088	0.51345	0.25908	0.7754	0.37134	0.34615	0.51477	0.63209	0.94463	0.22456	0.82776	0.37996	0.78655	0.39422	0.38443	0.39867	0.20364	0.4739	0.74401	0.22984	0.36308
377	0.49945	0.44217	0.33677	0.55158	0.42293	0.67248	0.251	0.32923	0.24432	0.33778	0.78826	0.26752	0.37131	0.29776	0.59304	0.26518	0.87887	0.25483	0.75181	0.68722	0.89087	0.69729	0.66279	0.40563	0.90853	0.56395	0.27014	0.64774	0.42727	0.46027	0.21802	0.71497	0.32329	0.38145	0.46155	0.57492	0.91828	0.23188	0.90841	0.33156	0.88405	0.34525	0.43203	0.45094	0.16942	0.55179	0.85223	0.23801	0.31537
378	0.58303	0.50765	0.36821	0.49662	0.37231	0.61384	0.26216	0.35857	0.2043	0.36947	0.72792	0.28176	0.32267	0.25305	0.53674	0.27898	0.82277	0.26667	0.69161	0.62821	0.92916	0.63804	0.60441	0.45882	0.858	0.66447	0.28494	0.58979	0.48768	0.40838	0.18126	0.65534	0.27698	0.42674	0.40962	0.51923	0.87129	0.23985	0.93092	0.28481	0.92764	0.2978	0.49404	0.51907	0.14103	0.64949	0.91587	0.24703	0.26951
379	0.68417	0.5914	0.408	0.443	0.32309	0.55658	0.27485	0.3955	0.16922	0.40961	0.668	0.2984	0.27588	0.21166	0.48185	0.29505	0.76337	0.28022	0.63234	0.57054	0.91706	0.58011	0.54744	0.52769	0.80069	0.77329	0.3023	0.53325	0.56546	0.35777	0.1502	0.59694	0.23337	0.48534	0.35897	0.46492	0.81548	0.2486	0.90896	0.24056	0.91921	0.2526	0.57375	0.60565	0.1189	0.75791	0.9237	0.25705	0.22654
380	0.78871	0.69113	0.4589	0.39067	0.2758	0.5007	0.28945	0.44257	0.14029	0.46096	0.60911	0.31809	0.23193	0.17511	0.42826	0.314	0.70329	0.29591	0.57431	0.51425	0.87744	0.52355	0.49185	0.61418	0.74105	0.86245	0.32295	0.47809	0.66047	0.30871	0.12556	0.5399	0.19384	0.56033	0.30986	0.41191	0.75634	0.25827	0.86476	0.20017	0.88135	0.21087	0.67038	0.70696	0.10259	0.85126	0.89424	0.26829	0.18788
381	0.86821	0.79179	0.52388	0.33974	0.23146	0.44614	0.30645	0.50272	0.11791	0.52648	0.55146	0.34175	0.19225	0.14472	0.37598	0.33667	0.64366	0.31431	0.5176	0.45929	0.82541	0.46833	0.43757	0.71352	0.68111	0.90497	0.34788	0.42423	0.76213	0.26189	0.10714	0.48419	0.15991	0.65165	0.26297	0.36024	0.69642	0.26903	0.81066	0.16516	0.83012	0.17414	0.77195	0.80558	0.091093	0.90084	0.84693	0.28101	0.15502
382	0.9006	0.86604	0.60447	0.29068	0.19154	0.39288	0.32648	0.57815	0.10153	0.60759	0.49509	0.37057	0.15834	0.12103	0.32523	0.36419	0.58501	0.33618	0.46219	0.40562	0.76802	0.41439	0.3846	0.80774	0.62177	0.90012	0.3784	0.3717	0.84598	0.2185	0.094027	0.42977	0.13258	0.74998	0.21948	0.3102	0.63687	0.28111	0.75244	0.13666	0.77306	0.14373	0.85291	0.87364	0.083311	0.90182	0.79163	0.29557	0.12882
383	0.88956	0.89444	0.6966	0.24441	0.15754	0.34108	0.35041	0.66706	0.090055	0.69994	0.44	0.40612	0.13119	0.10359	0.27661	0.39801	0.52752	0.36253	0.40806	0.35335	0.70875	0.36183	0.33314	0.87052	0.56345	0.86591	0.41622	0.32076	0.88815	0.1801	0.085052	0.37669	0.1119	0.83318	0.18094	0.26255	0.57823	0.2948	0.69296	0.11488	0.7139	0.12012	0.8906	0.89494	0.078287	0.8708	0.7331	0.31239	0.10917
384	0.8527	0.88172	0.78548	0.20232	0.1304	0.29124	0.37934	0.75838	0.082331	0.78829	0.38622	0.4503	0.11075	0.091321	0.23121	0.43995	0.47124	0.39463	0.35535	0.30289	0.64926	0.31099	0.28374	0.88827	0.50627	0.81733	0.46337	0.27209	0.88623	0.14809	0.07917	0.3252	0.097041	0.87817	0.14876	0.2185	0.52069	0.31046	0.63355	0.099124	0.6544	0.10281	0.885	0.87741	0.075277	0.8238	0.67368	0.33205	0.095145
385	0.80319	0.84447	0.8486	0.16602	0.11005	0.24433	0.41465	0.83114	0.077371	0.85012	0.33401	0.50509	0.096127	0.083028	0.19055	0.49198	0.41622	0.43408	0.30447	0.25511	0.59032	0.26265	0.23746	0.86922	0.45031	0.76208	0.52178	0.22685	0.85498	0.1231	0.075545	0.27596	0.086799	0.88015	0.12361	0.17965	0.46434	0.32854	0.57483	0.088194	0.59539	0.090687	0.85166	0.83769	0.07373	0.76931	0.61448	0.35529	0.085537
386	0.74772	0.79508	0.8715	0.13666	0.09555	0.2018	0.45796	0.86677	0.074418	0.87156	0.28395	0.57154	0.08609	0.077663	0.15618	0.55544	0.3626	0.48259	0.2563	0.21134	0.53227	0.21809	0.19579	0.8292	0.39562	0.70403	0.59202	0.18659	0.80866	0.10471	0.073556	0.23011	0.080014	0.85192	0.10507	0.1474	0.40922	0.34962	0.51707	0.080903	0.53726	0.082512	0.80427	0.7871	0.073243	0.71158	0.55602	0.38305	0.079215
387	0.68975	0.73989	0.85831	0.1144	0.085618	0.16526	0.51077	0.86365	0.072918	0.85733	0.23715	0.64761	0.079464	0.074423	0.12896	0.62925	0.31081	0.54143	0.21219	0.17322	0.47528	0.17893	0.16031	0.77876	0.34247	0.64515	0.67068	0.15282	0.755	0.091792	0.072752	0.18922	0.075748	0.80756	0.092041	0.12235	0.35556	0.37442	0.4604	0.076272	0.48016	0.077241	0.75007	0.73134	0.073525	0.65279	0.49852	0.41643	0.075285
388	0.63107	0.68219	0.82263	0.098404	0.079079	0.13584	0.57354	0.83385	0.072468	0.82109	0.19515	0.72514	0.075319	0.072717	0.10873	0.70689	0.2617	0.61001	0.17378	0.14205	0.41947	0.14657	0.13203	0.72327	0.29144	0.58642	0.74732	0.12633	0.69799	0.083062	0.072805	0.15483	0.073303	0.75514	0.083226	0.10401	0.30384	0.40379	0.40495	0.073565	0.42423	0.074073	0.69282	0.67344	0.074365	0.59403	0.44213	0.4567	0.073082
389	0.57255	0.62373	0.77509	0.087383	0.075004	0.11363	0.64385	0.78945	0.072777	0.77326	0.15952	0.78934	0.072966	0.072121	0.094409	0.77499	0.21664	0.6834	0.14238	0.11819	0.36504	0.12155	0.11087	0.66562	0.2436	0.52832	0.80582	0.10677	0.63975	0.077406	0.073479	0.12776	0.072174	0.69887	0.077509	0.09118	0.25502	0.4387	0.35098	0.072246	0.36966	0.072422	0.63449	0.61494	0.07561	0.53583	0.38701	0.50493	0.072126
390	0.51464	0.56537	0.72153	0.080072	0.072703	0.097751	0.71419	0.73753	0.073637	0.71956	0.13124	0.82596	0.071904	0.072325	0.084665	0.8185	0.17726	0.75079	0.11836	0.10094	0.31249	0.10331	0.095834	0.60734	0.20046	0.4711	0.83359	0.09301	0.58138	0.073969	0.074602	0.10773	0.071994	0.64107	0.074028	0.082541	0.21052	0.48003	0.29908	0.071929	0.31691	0.071866	0.57612	0.55664	0.077149	0.47848	0.33353	0.56131	0.072072
391	0.45761	0.50759	0.66512	0.075448	0.071678	0.086851	0.77213	0.68192	0.074894	0.66308	0.11018	0.83045	0.071772	0.073107	0.078288	0.83017	0.14495	0.79837	0.10102	0.088999	0.26272	0.090607	0.08557	0.54923	0.16366	0.41496	0.82964	0.083696	0.52344	0.072128	0.076051	0.093627	0.072498	0.58293	0.072154	0.076961	0.172	0.5282	0.25028	0.072335	0.26685	0.072098	0.51822	0.49897	0.078903	0.42217	0.28241	0.6239	0.072667
392	0.4017	0.45066	0.60759	0.07276	0.071575	0.079643	0.80579	0.62471	0.076439	0.60554	0.095276	0.80926	0.072313	0.074308	0.074341	0.81432	0.12015	0.81731	0.089013	0.081032	0.21713	0.082082	0.078824	0.49169	0.13428	0.36022	0.8025	0.077638	0.46625	0.071437	0.077736	0.08407	0.073498	0.52508	0.07144	0.073586	0.14074	0.5824	0.20607	0.073264	0.22082	0.072902	0.46112	0.44219	0.080816	0.3672	0.23488	0.68698	0.073733
393	0.34728	0.39485	0.5499	0.07146	0.072136	0.075103	0.81105	0.56707	0.078194	0.54785	0.085136	0.77175	0.073338	0.075812	0.072139	0.78011	0.1022	0.80865	0.081012	0.075947	0.17738	0.076596	0.074616	0.43503	0.11229	0.30746	0.76138	0.073922	0.41008	0.071574	0.079595	0.077841	0.074856	0.4679	0.071561	0.071794	0.117	0.63948	0.16812	0.07457	0.18051	0.074118	0.40506	0.38658	0.082847	0.31412	0.19253	0.74109	0.075138
394	0.29504	0.34058	0.49258	0.071158	0.073175	0.072476	0.79239	0.50964	0.080102	0.49055	0.07849	0.725	0.074713	0.077534	0.071189	0.73529	0.089769	0.77993	0.075904	0.07293	0.14487	0.073291	0.072226	0.37955	0.096692	0.25768	0.7125	0.071885	0.35531	0.072307	0.081581	0.074004	0.076471	0.41168	0.072282	0.071138	0.099967	0.69328	0.13763	0.076148	0.14735	0.075631	0.35045	0.33261	0.084968	0.26387	0.15698	0.77621	0.076788
395	0.24614	0.28864	0.43598	0.071578	0.07456	0.071225	0.75771	0.45281	0.082123	0.43398	0.074365	0.67312	0.07634	0.079415	0.071141	0.68452	0.081475	0.73884	0.072879	0.071399	0.11999	0.071555	0.071146	0.32579	0.086055	0.21238	0.65938	0.071058	0.30261	0.073472	0.083663	0.071886	0.078275	0.35683	0.073438	0.071302	0.088253	0.7356	0.11467	0.077924	0.12182	0.077359	0.29799	0.2811	0.087162	0.21789	0.12905	0.78731	0.078617
396	0.20216	0.24023	0.38048	0.072515	0.076194	0.070961	0.71342	0.39695	0.084231	0.37853	0.072039	0.61857	0.078151	0.081414	0.071743	0.63059	0.07617	0.69066	0.071341	0.070934	0.10204	0.070942	0.071004	0.27465	0.079066	0.17323	0.60415	0.071098	0.25306	0.074946	0.08582	0.071	0.080215	0.30401	0.074906	0.072056	0.080486	0.75948	0.098321	0.079843	0.10333	0.079243	0.2488	0.23336	0.089416	0.17786	0.10846	0.77587	0.080576
397	0.16473	0.19696	0.32665	0.073823	0.078007	0.071405	0.66363	0.34254	0.086405	0.32477	0.071001	0.56281	0.080094	0.083501	0.072809	0.57515	0.072999	0.63852	0.070868	0.071233	0.089661	0.071134	0.071535	0.22748	0.074692	0.14153	0.54804	0.07176	0.2082	0.076643	0.088038	0.070995	0.082256	0.25432	0.076599	0.073232	0.075557	0.76238	0.087156	0.081869	0.090536	0.081241	0.20445	0.19102	0.091722	0.14516	0.094043	0.74751	0.082631
398	0.13494	0.16047	0.27542	0.0754	0.079951	0.072359	0.61075	0.29042	0.088635	0.27366	0.07089	0.50668	0.082135	0.085656	0.074212	0.51914	0.07136	0.58426	0.071164	0.072083	0.081428	0.071908	0.072553	0.18597	0.072194	0.11752	0.49178	0.072872	0.16972	0.078501	0.090306	0.071627	0.084374	0.2093	0.078454	0.074714	0.072662	0.74666	0.0798	0.083974	0.082001	0.083325	0.16661	0.15565	0.094078	0.12019	0.084319	0.70822	0.084761
399	0.11273	0.13168	0.22818	0.07717	0.081991	0.07368	0.55628	0.24183	0.090913	0.22659	0.071446	0.45075	0.084251	0.087866	0.075856	0.46319	0.070819	0.52903	0.072012	0.073329	0.076176	0.073099	0.073919	0.15159	0.071037	0.10035	0.43589	0.074306	0.13879	0.080477	0.092621	0.072717	0.086552	0.17064	0.080427	0.076415	0.071221	0.71702	0.075173	0.086142	0.076533	0.085476	0.13639	0.12803	0.096481	0.10222	0.078002	0.66225	0.086949
400	0.097059	0.11042	0.18661	0.079079	0.084103	0.075264	0.50117	0.19838	0.093235	0.18525	0.07248	0.39552	0.086425	0.090122	0.077672	0.40781	0.071064	0.47359	0.073256	0.074859	0.073047	0.07459	0.075536	0.12502	0.07084	0.088599	0.38087	0.075972	0.11556	0.082539	0.094981	0.074135	0.088779	0.13955	0.082487	0.078273	0.070821	0.67808	0.072491	0.08836	0.07325	0.087679	0.11382	0.10781	0.098932	0.089865	0.074113	0.61232	0.089185
401	0.086443	0.095513	0.15219	0.081088	0.086271	0.077036	0.44606	0.16171	0.095599	0.15111	0.073857	0.34159	0.088646	0.09242	0.079614	0.35356	0.071874	0.41848	0.074783	0.076593	0.071437	0.076295	0.077332	0.10572	0.071332	0.080839	0.32737	0.077803	0.09908	0.084667	0.097384	0.075787	0.09105	0.11616	0.084614	0.080246	0.071167	0.63323	0.071201	0.090622	0.07153	0.089927	0.097866	0.093728	0.10144	0.081669	0.071959	0.56011	0.091464
402	0.079501	0.085468	0.12557	0.083173	0.088486	0.078945	0.39151	0.13277	0.098006	0.12477	0.07548	0.28988	0.090908	0.094758	0.081647	0.30129	0.07309	0.3643	0.076514	0.078473	0.070917	0.078154	0.079258	0.092358	0.07232	0.075931	0.27641	0.079755	0.087862	0.086846	0.099833	0.077609	0.09336	0.099552	0.086792	0.082303	0.07205	0.5847	0.07091	0.092924	0.070931	0.092214	0.087045	0.084288	0.10399	0.076452	0.07105	0.50671	0.093782
403	0.075171	0.078934	0.10625	0.085315	0.09074	0.080951	0.3382	0.11138	0.10046	0.10568	0.077278	0.24167	0.093208	0.097136	0.083749	0.25219	0.074597	0.31182	0.078391	0.080459	0.071178	0.080125	0.081278	0.083447	0.073663	0.073049	0.22938	0.081794	0.080491	0.089069	0.10233	0.079551	0.095709	0.088252	0.089014	0.084422	0.073317	0.53398	0.071336	0.095264	0.071135	0.09454	0.079959	0.078185	0.10661	0.073349	0.071032	0.45289	0.096139
404	0.072702	0.074894	0.092889	0.087503	0.09303	0.083031	0.28708	0.09641	0.10296	0.092505	0.079204	0.19862	0.095546	0.099555	0.085903	0.20785	0.076311	0.2622	0.080374	0.082523	0.072	0.082177	0.083367	0.077719	0.07526	0.071617	0.18798	0.083899	0.075857	0.091329	0.10488	0.081583	0.098097	0.080822	0.091272	0.086591	0.07486	0.48206	0.072276	0.097643	0.071916	0.096904	0.075525	0.074451	0.1093	0.071758	0.071654	0.3993	0.098536
405	0.071566	0.072632	0.08398	0.089729	0.095355	0.085165	0.2395	0.086323	0.10551	0.083728	0.08122	0.16233	0.09792	0.10202	0.088098	0.16994	0.078174	0.21695	0.082433	0.084645	0.073222	0.084291	0.08551	0.074253	0.077039	0.071224	0.15369	0.086053	0.073171	0.093623	0.10749	0.08368	0.10053	0.076146	0.093566	0.088801	0.0766	0.42971	0.073583	0.10006	0.07311	0.099308	0.072983	0.072409	0.11206	0.071252	0.072733	0.34664	0.10098
406	0.071386	0.071646	0.078252	0.091989	0.097717	0.087343	0.19712	0.079757	0.10812	0.078095	0.083305	0.13375	0.10033	0.10453	0.09033	0.13961	0.080144	0.17777	0.084551	0.086812	0.074732	0.086451	0.087694	0.072404	0.078947	0.071576	0.12717	0.088248	0.07188	0.095952	0.11016	0.085827	0.103	0.073431	0.095894	0.091045	0.07848	0.37763	0.075153	0.10252	0.074599	0.10175	0.071796	0.07158	0.1149	0.071523	0.07414	0.29585	0.10346
407	0.071894	0.071578	0.074797	0.094281	0.10012	0.089557	0.1615	0.075706	0.11079	0.074707	0.08544	0.11262	0.10279	0.10709	0.092594	0.11688	0.082192	0.14593	0.086713	0.089017	0.076447	0.088649	0.089915	0.071719	0.08095	0.072465	0.10788	0.090478	0.071594	0.098316	0.11291	0.088014	0.10552	0.072127	0.098257	0.093321	0.080462	0.32664	0.076911	0.10504	0.076299	0.10424	0.071584	0.071624	0.11784	0.072353	0.075781	0.24823	0.10599
408	0.072892	0.072163	0.07296	0.096605	0.10255	0.091803	0.13349	0.073444	0.11354	0.072919	0.087616	0.097826	0.10529	0.10972	0.09489	0.10079	0.084298	0.12175	0.088912	0.091254	0.078308	0.090881	0.092167	0.071863	0.083021	0.073734	0.094542	0.092739	0.072024	0.10072	0.11573	0.090235	0.1081	0.071829	0.10066	0.09563	0.082517	0.27783	0.078803	0.1076	0.078149	0.10678	0.072067	0.07229	0.12088	0.073581	0.077589	0.20538	0.10858
409	0.074238	0.073215	0.072281	0.098962	0.10504	0.094079	0.11286	0.07246	0.11636	0.072274	0.089826	0.087877	0.10785	0.1124	0.097216	0.089883	0.086448	0.10444	0.091142	0.093521	0.080274	0.093142	0.094449	0.0726	0.085143	0.075275	0.085653	0.09503	0.072965	0.10316	0.11865	0.092486	0.11073	0.072249	0.1031	0.09797	0.084627	0.23262	0.080791	0.11022	0.080107	0.10938	0.073045	0.0734	0.12404	0.075093	0.079517	0.16889	0.11123
410	0.075834	0.074601	0.072429	0.10135	0.10757	0.096385	0.098433	0.07239	0.11928	0.072447	0.092065	0.081422	0.11046	0.11516	0.099576	0.082744	0.088633	0.092609	0.093401	0.095818	0.082315	0.095433	0.096761	0.07376	0.087305	0.077011	0.079952	0.097352	0.074271	0.10564	0.12166	0.094767	0.11343	0.073183	0.10558	0.10034	0.08678	0.19263	0.082849	0.1129	0.082143	0.11204	0.074378	0.074826	0.12733	0.076807	0.08153	0.1398	0.11395
411	0.077608	0.076224	0.073168	0.10379	0.11015	0.098721	0.088743	0.072973	0.12229	0.073203	0.094332	0.077449	0.11313	0.118	0.10197	0.078284	0.090849	0.084802	0.095689	0.098145	0.084412	0.097754	0.099104	0.075222	0.0895	0.078884	0.076515	0.099705	0.075837	0.10817	0.12479	0.097077	0.11621	0.074483	0.10811	0.10275	0.088966	0.1593	0.084959	0.11566	0.084236	0.11476	0.075964	0.076478	0.13077	0.078665	0.083605	0.11806	0.11674
412	0.079508	0.078016	0.074329	0.10626	0.1128	0.10109	0.082469	0.074023	0.12542	0.074377	0.096628	0.075246	0.11587	0.12093	0.1044	0.075733	0.093092	0.079869	0.098006	0.1005	0.086552	0.10011	0.10148	0.076899	0.091724	0.080856	0.074694	0.10209	0.077589	0.11076	0.12805	0.099417	0.11906	0.076045	0.11069	0.10521	0.091181	0.13328	0.087108	0.11849	0.086372	0.11756	0.077729	0.078291	0.1344	0.080625	0.085728	0.1027	0.11962
413	0.081499	0.079929	0.075791	0.10878	0.11551	0.10349	0.078635	0.075406	0.12867	0.075848	0.098952	0.074311	0.11869	0.12396	0.10688	0.07455	0.095362	0.076989	0.10035	0.1029	0.088725	0.10249	0.10389	0.07873	0.093974	0.082899	0.074032	0.10452	0.079473	0.11341	0.13145	0.10179	0.12201	0.077793	0.11334	0.1077	0.093423	0.11416	0.08929	0.12141	0.088543	0.12045	0.079623	0.080219	0.13822	0.082661	0.087887	0.092288	0.12259
414	0.083555	0.081928	0.077467	0.11135	0.11829	0.10594	0.076534	0.077026	0.13207	0.077531	0.10131	0.074278	0.12159	0.1271	0.1094	0.07434	0.097659	0.075568	0.10273	0.10533	0.090927	0.10492	0.10635	0.080669	0.09625	0.084995	0.074192	0.10698	0.081451	0.11612	0.13502	0.1042	0.12506	0.079674	0.11605	0.11024	0.095691	0.10084	0.0915	0.12444	0.090742	0.12343	0.081608	0.082229	0.14228	0.08475	0.090076	0.085504	0.12567
415	0.08566	0.08399	0.079295	0.11398	0.12115	0.10842	0.07567	0.078814	0.13564	0.079363	0.1037	0.074887	0.12459	0.13038	0.11197	0.074824	0.099984	0.075189	0.10515	0.1078	0.093155	0.10738	0.10884	0.082687	0.098554	0.087131	0.07494	0.1095	0.083497	0.1189	0.13878	0.10665	0.12823	0.081648	0.11883	0.11284	0.097985	0.091919	0.093735	0.12757	0.092967	0.12651	0.083659	0.084299	0.14661	0.086881	0.092292	0.081304	0.12886
416	0.087802	0.086098	0.081232	0.11667	0.12411	0.11096	0.075689	0.080722	0.13939	0.081303	0.10612	0.075955	0.1277	0.13379	0.1146	0.075802	0.10234	0.075553	0.10761	0.11032	0.095407	0.10989	0.11139	0.084762	0.10089	0.089298	0.076106	0.11206	0.085593	0.12177	0.14277	0.10914	0.13153	0.083691	0.12169	0.1155	0.10031	0.086201	0.095994	0.13083	0.095218	0.12972	0.08576	0.086413	0.15126	0.089044	0.094532	0.078948	0.1322
417	0.089973	0.088242	0.083246	0.11943	0.12717	0.11354	0.076335	0.082714	0.14336	0.083319	0.10859	0.077347	0.13094	0.13738	0.11729	0.07713	0.10473	0.076445	0.11011	0.11289	0.097685	0.11244	0.11398	0.086879	0.10325	0.091492	0.077569	0.11467	0.087727	0.12472	0.147	0.11168	0.13497	0.085784	0.12464	0.11822	0.10266	0.082763	0.098279	0.13424	0.097492	0.13306	0.087897	0.088562	0.1563	0.091235	0.096797	0.077903	0.13568
418	0.092171	0.090415	0.085316	0.12226	0.13034	0.11619	0.077426	0.084769	0.14759	0.085391	0.1111	0.07897	0.13431	0.14115	0.12006	0.078708	0.10715	0.07771	0.11266	0.11551	0.099988	0.11506	0.11664	0.08903	0.10565	0.093711	0.079242	0.11735	0.089892	0.12778	0.15154	0.11427	0.13858	0.087915	0.1277	0.12102	0.10504	0.080944	0.10059	0.13781	0.099793	0.13656	0.090064	0.090739	0.1618	0.09345	0.099087	0.07779	0.13934
419	0.094392	0.092613	0.087428	0.12519	0.13364	0.11889	0.078832	0.086869	0.15211	0.087505	0.11366	0.080757	0.13784	0.14514	0.1229	0.080462	0.10962	0.079242	0.11526	0.1182	0.10232	0.11773	0.11936	0.091208	0.10808	0.095953	0.081065	0.1201	0.092082	0.13095	0.15644	0.11692	0.14239	0.090076	0.13087	0.12389	0.10746	0.080278	0.10293	0.14156	0.10212	0.14023	0.092257	0.092941	0.16786	0.095688	0.1014	0.078339	0.1432
420	0.096636	0.094834	0.089573	0.12821	0.13709	0.12167	0.080464	0.089005	0.15698	0.089651	0.11627	0.08266	0.14155	0.14939	0.12582	0.082342	0.11213	0.080962	0.11792	0.12095	0.10468	0.12047	0.12216	0.09341	0.11055	0.098218	0.082994	0.12292	0.094296	0.13425	0.16176	0.11963	0.14642	0.092263	0.13416	0.12686	0.10992	0.080435	0.1053	0.14553	0.10448	0.1441	0.094473	0.095165	0.17461	0.097949	0.10375	0.07936	0.14729
421	0.098903	0.097078	0.091746	0.13134	0.14071	0.12453	0.082258	0.091169	0.16227	0.091824	0.11895	0.084648	0.14546	0.15393	0.12885	0.084313	0.11469	0.082819	0.12065	0.12378	0.10708	0.12328	0.12503	0.095635	0.11307	0.10051	0.085001	0.12582	0.096532	0.1377	0.1676	0.12241	0.15071	0.094473	0.13761	0.12993	0.11243	0.081184	0.10771	0.14975	0.10687	0.14821	0.096712	0.097412	0.18225	0.10023	0.10613	0.080721	0.15165
422	0.1012	0.099345	0.093942	0.13459	0.14451	0.12747	0.084164	0.093358	0.16806	0.094022	0.12169	0.086696	0.14961	0.15882	0.13198	0.086349	0.1173	0.084772	0.12345	0.1267	0.10951	0.12618	0.128	0.097882	0.11564	0.10282	0.087063	0.12882	0.098791	0.14131	0.17406	0.12528	0.1553	0.096706	0.14121	0.13312	0.11498	0.082345	0.11015	0.15425	0.1093	0.15258	0.098974	0.099683	0.19101	0.10255	0.10854	0.082318	0.15632
423	0.10351	0.10164	0.096161	0.13798	0.14853	0.13052	0.086152	0.09557	0.17448	0.096241	0.12451	0.08879	0.15404	0.16413	0.13523	0.088433	0.11997	0.086794	0.12633	0.12971	0.11198	0.12917	0.13107	0.10015	0.11827	0.10517	0.089167	0.13192	0.10107	0.14511	0.18132	0.12823	0.16025	0.098961	0.14501	0.13643	0.11759	0.083797	0.11264	0.1591	0.11177	0.15727	0.10126	0.10198	0.20123	0.10489	0.11099	0.084082	0.16137
424	0.10586	0.10395	0.098401	0.14153	0.15281	0.13367	0.0882	0.097803	0.18165	0.098482	0.12741	0.090918	0.15879	0.16994	0.13862	0.090554	0.12271	0.088867	0.1293	0.13282	0.1145	0.13226	0.13425	0.10245	0.12095	0.10755	0.091305	0.13514	0.10338	0.14912	0.18957	0.13128	0.16562	0.10124	0.14901	0.13989	0.12025	0.085459	0.11517	0.16435	0.11428	0.16234	0.10357	0.1043	0.21343	0.10726	0.11348	0.085966	0.16686
425	0.10824	0.1063	0.10066	0.14525	0.15738	0.13694	0.090293	0.10006	0.18979	0.10075	0.1304	0.093075	0.16392	0.17636	0.14216	0.092704	0.12552	0.090978	0.13237	0.13606	0.11706	0.13547	0.13755	0.10477	0.12371	0.10996	0.093469	0.1385	0.10572	0.15339	0.1991	0.13444	0.17151	0.10354	0.15327	0.14351	0.12298	0.087268	0.11775	0.17009	0.11684	0.16785	0.10591	0.10665	0.22835	0.10966	0.11602	0.087937	0.1729
426	0.11065	0.10868	0.10295	0.14917	0.16229	0.14036	0.09242	0.10234	0.19918	0.10303	0.13349	0.095256	0.16951	0.18353	0.14588	0.09488	0.12842	0.093122	0.13555	0.13942	0.11968	0.13881	0.141	0.10712	0.12653	0.11241	0.095657	0.14199	0.10809	0.15794	0.21032	0.13773	0.17801	0.10587	0.15782	0.14732	0.12578	0.089184	0.12038	0.17641	0.11945	0.17389	0.10828	0.10904	0.24715	0.11211	0.11861	0.089972	0.17959
427	0.11311	0.11109	0.10527	0.15332	0.16762	0.14392	0.094576	0.10464	0.21017	0.10535	0.1367	0.09746	0.17565	0.19165	0.14979	0.097079	0.1314	0.095291	0.13885	0.14294	0.12236	0.14229	0.1446	0.1095	0.12944	0.1149	0.097867	0.14566	0.11049	0.16284	0.22381	0.14115	0.18529	0.10824	0.1627	0.15134	0.12866	0.091179	0.12308	0.18346	0.12213	0.18059	0.11069	0.11145	0.27156	0.11459	0.12126	0.092055	0.18709
428	0.1156	0.11354	0.10761	0.15774	0.17343	0.14767	0.096758	0.10697	0.22334	0.10769	0.14003	0.099686	0.18246	0.20098	0.15394	0.0993	0.13448	0.097485	0.1423	0.14662	0.12511	0.14593	0.14839	0.11192	0.13244	0.11743	0.1001	0.14952	0.11293	0.16813	0.24046	0.14472	0.19353	0.11063	0.16798	0.1556	0.13162	0.093234	0.12585	0.19142	0.12487	0.18811	0.11313	0.11391	0.30461	0.11712	0.12397	0.094176	0.19563
429	0.11814	0.11604	0.10998	0.16247	0.17983	0.15161	0.098963	0.10934	0.2395	0.11007	0.1435	0.10194	0.19011	0.21189	0.15834	0.10154	0.13767	0.099701	0.1459	0.15049	0.12792	0.14976	0.15239	0.11438	0.13554	0.12002	0.10235	0.15359	0.1154	0.17391	0.26162	0.14848	0.20301	0.11306	0.17374	0.16015	0.13469	0.095335	0.12869	0.20052	0.12768	0.19665	0.11561	0.11641	0.35129	0.1197	0.12675	0.096329	0.20549
430	0.12073	0.11857	0.11239	0.16756	0.18696	0.15578	0.10119	0.11173	0.25992	0.11247	0.14714	0.10421	0.19881	0.2249	0.16306	0.10381	0.14099	0.10194	0.14968	0.15458	0.13082	0.15381	0.15662	0.11688	0.13876	0.12266	0.10463	0.15792	0.11793	0.18027	0.28948	0.15243	0.21411	0.11553	0.18008	0.16503	0.13786	0.097472	0.13161	0.21112	0.13056	0.20651	0.11814	0.11896	0.42013	0.12233	0.1296	0.098509	0.21709
431	0.12338	0.12116	0.11483	0.17308	0.195	0.16022	0.10344	0.11416	0.28663	0.11492	0.15096	0.1065	0.20888	0.2408	0.16813	0.1061	0.14445	0.1042	0.15367	0.15893	0.13381	0.15809	0.16113	0.11942	0.1421	0.12537	0.10694	0.16253	0.1205	0.18733	0.32769	0.15662	0.22737	0.11804	0.18712	0.17031	0.14115	0.099641	0.13463	0.22371	0.13354	0.21811	0.12072	0.12155	0.52517	0.12502	0.13254	0.10071	0.23104
432	0.12608	0.12381	0.11731	0.17913	0.20419	0.16497	0.10572	0.11663	0.32291	0.1174	0.15498	0.10883	0.22073	0.26079	0.17363	0.10842	0.14806	0.10649	0.15789	0.16357	0.13689	0.16266	0.16596	0.12202	0.14558	0.12814	0.10927	0.16749	0.12312	0.19529	0.38232	0.16106	0.2436	0.1206	0.19504	0.17604	0.14458	0.10184	0.13774	0.23899	0.13661	0.23203	0.12335	0.12421	0.68201	0.12778	0.13557	0.10294	0.24825
433	0.12886	0.12651	0.11984	0.1858	0.21487	0.17007	0.10802	0.11915	0.3743	0.11993	0.15925	0.11118	0.23498	0.28674	0.17964	0.11077	0.15185	0.1088	0.16238	0.16854	0.14008	0.16756	0.17116	0.12467	0.14922	0.13098	0.11163	0.17284	0.1258	0.20436	0.46355	0.16582	0.26402	0.12322	0.20408	0.18234	0.14816	0.10406	0.14097	0.25806	0.13979	0.24916	0.12604	0.12692	0.87825	0.13061	0.1387	0.10519	0.27008
434	0.13171	0.12928	0.12242	0.19324	0.22752	0.17561	0.11034	0.12171	0.44998	0.12251	0.16378	0.11357	0.25255	0.32168	0.18626	0.11315	0.15584	0.11114	0.16718	0.17392	0.1434	0.17284	0.17681	0.12738	0.15304	0.13391	0.11403	0.17867	0.12855	0.21487	0.58611	0.17094	0.29056	0.12589	0.21454	0.18932	0.15191	0.10631	0.14432	0.2826	0.14309	0.27085	0.12879	0.1297	1.0243	0.13352	0.14194	0.10747	0.29874
435	0.13464	0.13213	0.12505	0.20164	0.24283	0.18165	0.1127	0.12432	0.56361	0.12515	0.16864	0.11599	0.27485	0.37063	0.19364	0.11556	0.16005	0.11352	0.17234	0.17978	0.14685	0.17858	0.18299	0.13016	0.15706	0.13692	0.11646	0.18507	0.13137	0.22728	0.75851	0.17648	0.32633	0.12862	0.22688	0.19715	0.15586	0.10858	0.14782	0.3153	0.14653	0.29925	0.13162	0.13256	1.0534	0.13652	0.14532	0.10977	0.3378
436	0.13765	0.13505	0.12774	0.21127	0.26185	0.1883	0.11509	0.12699	0.72588	0.12784	0.17387	0.11845	0.30408	0.44185	0.20196	0.11801	0.16454	0.11592	0.17794	0.1862	0.15045	0.18488	0.18982	0.13301	0.16132	0.14004	0.11893	0.19217	0.13426	0.24224	0.94046	0.18253	0.37646	0.13142	0.24175	0.20603	0.16002	0.11088	0.15147	0.36057	0.15011	0.3378	0.13452	0.13549	1.0175	0.13962	0.14883	0.11211	0.39315
437	0.14077	0.13806	0.1305	0.22248	0.28616	0.19571	0.11752	0.12972	0.90892	0.1306	0.17954	0.12095	0.34384	0.54764	0.21146	0.1205	0.16932	0.11837	0.18405	0.19333	0.15422	0.19183	0.19745	0.13595	0.16584	0.14326	0.12144	0.20013	0.13725	0.26073	1.0369	0.18919	0.4493	0.1343	0.26011	0.21627	0.16444	0.11321	0.1553	0.42566	0.15386	0.39217	0.13751	0.13852	0.96201	0.14282	0.1525	0.11447	0.47429
438	0.144	0.14117	0.13332	0.23577	0.3183	0.20405	0.11998	0.13252	1.0232	0.13342	0.18574	0.1235	0.39995	0.69905	0.2225	0.12303	0.17446	0.12085	0.19079	0.20132	0.15818	0.19961	0.20606	0.13897	0.17068	0.1466	0.124	0.20917	0.14032	0.28424	1.0333	0.1966	0.55702	0.13726	0.28342	0.22827	0.16915	0.11557	0.15932	0.52164	0.1578	0.47147	0.1406	0.14165	0.90088	0.14615	0.15635	0.11686	0.59408
439	0.14735	0.14439	0.13622	0.25187	0.36233	0.21356	0.12249	0.1354	1.0336	0.13633	0.19257	0.12609	0.48164	0.87701	0.23554	0.12562	0.18002	0.12338	0.19828	0.21038	0.16236	0.20841	0.21592	0.14209	0.17587	0.15009	0.12661	0.21958	0.1435	0.3151	0.98812	0.20493	0.70933	0.14031	0.314	0.24261	0.17419	0.11796	0.16358	0.66046	0.16196	0.588	0.14379	0.14488	0.83948	0.1496	0.16041	0.11929	0.75786
440	0.15083	0.14773	0.1392	0.27188	0.4248	0.22459	0.12504	0.13835	0.99334	0.13931	0.20018	0.12874	0.60087	1.0031	0.25128	0.12825	0.18607	0.12595	0.20671	0.22082	0.16679	0.21851	0.2274	0.14532	0.18149	0.15372	0.12928	0.23179	0.14679	0.35704	0.9299	0.21443	0.88404	0.14346	0.35551	0.26015	0.17964	0.12039	0.1681	0.83384	0.16637	0.74756	0.1471	0.14824	0.77943	0.15321	0.16469	0.12176	0.92702
441	0.15446	0.1512	0.14228	0.29746	0.51556	0.23759	0.12764	0.1414	0.93682	0.14239	0.20875	0.13145	0.76115	1.0276	0.27075	0.13095	0.19272	0.12858	0.21632	0.23305	0.17151	0.23028	0.24102	0.14866	0.18761	0.15752	0.132	0.24637	0.15021	0.41605	0.8685	0.22542	1.0028	0.14672	0.41386	0.28217	0.18555	0.12285	0.17292	0.97715	0.17105	0.91543	0.15053	0.15173	0.72137	0.15698	0.16924	0.12427	1.0184
442	0.15826	0.15481	0.14546	0.3312	0.64524	0.25323	0.13029	0.14454	0.87574	0.14558	0.21853	0.13422	0.92336	0.99352	0.2955	0.1337	0.20009	0.13126	0.22745	0.24764	0.17657	0.24426	0.2575	0.15214	0.19433	0.16151	0.13479	0.2642	0.15377	0.5012	0.80738	0.23836	1.0228	0.15011	0.49798	0.31064	0.19202	0.12536	0.17809	1.0239	0.17607	1.0112	0.15411	0.15537	0.66551	0.16094	0.17409	0.12683	1.0174
443	0.16225	0.1586	0.14875	0.37721	0.80832	0.27249	0.133	0.14779	0.81443	0.14887	0.22987	0.13706	1.0101	0.93929	0.32792	0.13653	0.20835	0.134	0.24056	0.26545	0.18201	0.26123	0.27794	0.15577	0.20179	0.16573	0.13765	0.28655	0.15749	0.62298	0.74775	0.25391	0.98745	0.15363	0.61845	0.34865	0.19917	0.12791	0.18367	0.9997	0.18146	1.0148	0.15785	0.15918	0.61182	0.16511	0.1793	0.12943	0.97443
444	0.16646	0.16256	0.15217	0.44189	0.95147	0.29685	0.13578	0.15116	0.75438	0.15229	0.24323	0.13998	1.0088	0.87885	0.37181	0.13943	0.21772	0.13681	0.25631	0.28773	0.18791	0.28233	0.304	0.15957	0.21016	0.17018	0.14059	0.31537	0.16139	0.78005	0.69007	0.27301	0.93298	0.1573	0.77472	0.40105	0.20715	0.13051	0.18973	0.94906	0.18731	0.97384	0.16177	0.16318	0.56016	0.16952	0.18492	0.13209	0.91739
445	0.17091	0.16674	0.15572	0.53425	1.0089	0.32857	0.13862	0.15466	0.69616	0.15585	0.25931	0.14298	0.96649	0.81749	0.43302	0.1424	0.22849	0.13969	0.27566	0.3164	0.19435	0.30928	0.33822	0.16355	0.21965	0.17492	0.14362	0.35373	0.16549	0.92867	0.63447	0.29709	0.87256	0.16114	0.92473	0.47524	0.21615	0.13316	0.19637	0.88968	0.19369	0.9176	0.16589	0.1674	0.51028	0.1742	0.19103	0.13481	0.85639
446	0.17564	0.17116	0.15943	0.66233	0.99254	0.37116	0.14154	0.15832	0.63995	0.15956	0.27909	0.14606	0.90993	0.75703	0.51995	0.14547	0.24108	0.14265	0.30006	0.35442	0.20145	0.34477	0.3846	0.16774	0.23057	0.17999	0.14674	0.40635	0.16981	1.0007	0.58088	0.32834	0.81124	0.16518	0.99969	0.58055	0.22645	0.13587	0.20371	0.82837	0.20072	0.85682	0.17025	0.17186	0.4619	0.17921	0.19772	0.13758	0.7952
447	0.1807	0.17585	0.16331	0.81605	0.94544	0.43001	0.14454	0.16213	0.58573	0.16345	0.30405	0.14925	0.84916	0.69821	0.64086	0.14864	0.25607	0.14569	0.33169	0.40639	0.20935	0.3929	0.44918	0.17217	0.24335	0.18544	0.14996	0.48029	0.17439	0.99362	0.52913	0.37011	0.75081	0.16943	0.99452	0.72077	0.2384	0.13863	0.21191	0.76756	0.20852	0.79561	0.17486	0.17659	0.41472	0.18458	0.20512	0.14043	0.73518
448	0.18613	0.18086	0.16738	0.94364	0.88753	0.51279	0.14763	0.16613	0.53333	0.16753	0.33644	0.15255	0.78801	0.64128	0.78999	0.15191	0.27428	0.14883	0.37393	0.47908	0.21823	0.45989	0.54017	0.17687	0.25856	0.19134	0.15329	0.58414	0.17927	0.95028	0.47895	0.42757	0.69197	0.17392	0.95188	0.8711	0.25251	0.14147	0.22116	0.70819	0.21728	0.73543	0.17978	0.18165	0.36855	0.19038	0.21337	0.14335	0.67688
449	0.19199	0.18622	0.17167	0.99188	0.8266	0.62721	0.15081	0.17034	0.48251	0.17182	0.37969	0.15597	0.72788	0.58625	0.92339	0.15529	0.29693	0.15207	0.43188	0.58069	0.22835	0.55381	0.66406	0.18188	0.27705	0.19776	0.15675	0.72052	0.18449	0.8938	0.43008	0.50799	0.63499	0.1787	0.89565	0.97022	0.26949	0.14437	0.23173	0.65061	0.22724	0.67689	0.18505	0.18708	0.32339	0.1967	0.22269	0.14635	0.62046
450	0.19837	0.19201	0.1762	0.97404	0.76565	0.76954	0.1541	0.17478	0.43303	0.17637	0.43895	0.15952	0.66936	0.53299	0.98432	0.15881	0.32584	0.15542	0.51265	0.71395	0.24002	0.67988	0.81008	0.18725	0.30006	0.20481	0.16034	0.86511	0.19011	0.83326	0.38232	0.6189	0.57985	0.1838	0.83517	0.98809	0.2904	0.14735	0.24401	0.59488	0.23872	0.62017	0.19072	0.19294	0.27957	0.20362	0.23335	0.14943	0.56588
451	0.20537	0.1983	0.18102	0.92756	0.70582	0.90264	0.15751	0.1795	0.38468	0.1812	0.52124	0.16322	0.61262	0.48128	0.9749	0.16247	0.36375	0.1589	0.62324	0.85631	0.25371	0.82372	0.93087	0.19305	0.32941	0.21262	0.16409	0.96083	0.19619	0.77224	0.33565	0.75761	0.52644	0.18927	0.77413	0.95608	0.31676	0.15042	0.2585	0.54091	0.25215	0.56526	0.19687	0.19932	0.23785	0.21127	0.24572	0.15261	0.51297
452	0.21311	0.20518	0.18616	0.87041	0.64757	0.9716	0.16105	0.18451	0.33745	0.18635	0.63291	0.16708	0.55764	0.4309	0.93202	0.16629	0.41476	0.16251	0.7601	0.95338	0.27007	0.93614	0.97832	0.19934	0.36788	0.22136	0.168	0.97928	0.20282	0.71212	0.29033	0.89072	0.47454	0.19517	0.71398	0.90442	0.35087	0.15357	0.27592	0.48851	0.26817	0.51199	0.20358	0.2063	0.19947	0.21981	0.2603	0.1559	0.46153
453	0.22176	0.21277	0.19168	0.80993	0.59103	0.96979	0.16473	0.18988	0.29162	0.19188	0.76858	0.17112	0.50426	0.38169	0.87635	0.17028	0.48467	0.16627	0.88962	0.97515	0.29	0.97508	0.96266	0.20621	0.41956	0.23125	0.17211	0.94864	0.21011	0.65347	0.24707	0.96448	0.42395	0.20159	0.65527	0.84556	0.39615	0.15683	0.29731	0.43747	0.28764	0.46018	0.21096	0.21402	0.16587	0.22945	0.27783	0.15929	0.41134
454	0.23152	0.22122	0.19762	0.74913	0.53615	0.93074	0.16857	0.19566	0.24792	0.19784	0.89321	0.17537	0.45228	0.33369	0.81634	0.17447	0.57997	0.1702	0.96035	0.94665	0.31485	0.95537	0.91794	0.21379	0.49014	0.24259	0.17643	0.89797	0.21819	0.59647	0.20708	0.96733	0.37453	0.20861	0.59822	0.7848	0.45755	0.16019	0.3242	0.38763	0.31183	0.40962	0.21916	0.22262	0.13819	0.24048	0.29935	0.16281	0.36233
455	0.24268	0.23073	0.20408	0.68921	0.48276	0.87689	0.17258	0.20192	0.20754	0.20432	0.95809	0.17984	0.40156	0.28724	0.75556	0.17889	0.7019	0.17432	0.9624	0.89702	0.34658	0.90927	0.86186	0.22222	0.58576	0.25578	0.18098	0.83967	0.22724	0.54109	0.17182	0.93066	0.32638	0.21636	0.54279	0.72425	0.54121	0.16367	0.35883	0.33901	0.34264	0.36026	0.22835	0.23232	0.11677	0.25326	0.32635	0.16647	0.31464
456	0.25562	0.24156	0.21114	0.63066	0.43071	0.81762	0.17679	0.20874	0.17199	0.2114	0.95688	0.18457	0.35207	0.24317	0.69542	0.18355	0.83156	0.17865	0.92582	0.83924	0.38806	0.85283	0.8019	0.23169	0.70681	0.27138	0.18581	0.77916	0.23749	0.48722	0.14254	0.87798	0.27994	0.22499	0.48886	0.66479	0.65115	0.16728	0.40447	0.29195	0.3828	0.31229	0.23878	0.24339	0.10106	0.26831	0.36105	0.17028	0.26882
457	0.27086	0.25406	0.21892	0.57363	0.3799	0.75703	0.18122	0.21624	0.14251	0.21921	0.9193	0.1896	0.30407	0.20276	0.63654	0.1885	0.92473	0.18321	0.87339	0.77892	0.44341	0.79286	0.74126	0.24246	0.8335	0.29016	0.19095	0.71866	0.24924	0.43468	0.11974	0.81921	0.23611	0.23471	0.43628	0.60676	0.77843	0.17104	0.46571	0.24724	0.43627	0.26628	0.25077	0.2562	0.090038	0.28636	0.40669	0.17426	0.2259
458	0.28913	0.2687	0.22758	0.51811	0.33044	0.69678	0.18589	0.22454	0.11958	0.2279	0.86664	0.19497	0.25824	0.16753	0.57912	0.19377	0.95238	0.18804	0.81481	0.71844	0.51785	0.7323	0.68126	0.25486	0.92273	0.31322	0.19644	0.6591	0.26292	0.3834	0.10294	0.75876	0.19627	0.24577	0.38495	0.55025	0.88848	0.17495	0.54792	0.20615	0.50816	0.22332	0.26474	0.27124	0.082614	0.30842	0.4677	0.17842	0.18732
459	0.31145	0.28615	0.23731	0.46398	0.28281	0.6376	0.19085	0.23383	0.10272	0.23767	0.8081	0.20072	0.21578	0.13868	0.52317	0.19942	0.93014	0.19317	0.75448	0.65879	0.61569	0.6724	0.62246	0.26936	0.94788	0.34216	0.20234	0.60087	0.27908	0.33349	0.091109	0.69848	0.16193	0.25854	0.33499	0.49518	0.94183	0.17903	0.65386	0.1702	0.6031	0.18488	0.2813	0.28921	0.077852	0.33597	0.54922	0.18279	0.15456
460	0.33929	0.30731	0.24836	0.41114	0.23794	0.57977	0.19612	0.24434	0.090876	0.24877	0.74787	0.20693	0.1782	0.1165	0.4686	0.2055	0.88449	0.19865	0.69425	0.60041	0.73294	0.61368	0.56505	0.28658	0.92494	0.37926	0.20872	0.54406	0.29851	0.28541	0.083109	0.63916	0.13416	0.27349	0.28684	0.44145	0.93683	0.1833	0.77395	0.14065	0.71868	0.15242	0.30126	0.31109	0.075033	0.3711	0.6537	0.18739	0.12847
461	0.37475	0.3335	0.26107	0.35963	0.19724	0.52333	0.20175	0.25636	0.082871	0.26155	0.68772	0.21366	0.14688	0.10035	0.41533	0.21207	0.829	0.20453	0.63493	0.54341	0.84554	0.55633	0.50904	0.3074	0.87926	0.42773	0.21565	0.48864	0.32233	0.2401	0.077941	0.58113	0.11307	0.29128	0.24141	0.38901	0.89924	0.18779	0.8766	0.11786	0.83356	0.12672	0.32581	0.33824	0.073623	0.4168	0.7715	0.19225	0.10891
462	0.42075	0.36658	0.27591	0.30975	0.16226	0.46824	0.2078	0.2703	0.077706	0.27647	0.62844	0.22101	0.12242	0.089104	0.36339	0.21924	0.76979	0.21086	0.57684	0.48776	0.91578	0.50033	0.45436	0.33306	0.8239	0.49167	0.22325	0.43453	0.35211	0.19895	0.074834	0.52445	0.097864	0.31284	0.20012	0.33799	0.8474	0.19252	0.92716	0.10124	0.91017	0.10756	0.3566	0.37265	0.073237	0.47698	0.87217	0.1974	0.094969
463	0.48108	0.40912	0.29349	0.26223	0.13407	0.41444	0.21434	0.28671	0.074605	0.29416	0.57037	0.22909	0.1044	0.081566	0.31309	0.22711	0.70971	0.21773	0.52007	0.43341	0.92848	0.44565	0.40097	0.36531	0.76484	0.57503	0.23163	0.38173	0.39007	0.16354	0.073221	0.46911	0.087354	0.33945	0.16451	0.28889	0.78966	0.19752	0.9234	0.089632	0.92913	0.093966	0.39597	0.41703	0.073592	0.55577	0.92233	0.20289	0.085417
464	0.5596	0.46456	0.31467	0.2183	0.11274	0.36201	0.22145	0.30633	0.072998	0.31549	0.51358	0.23806	0.09172	0.076751	0.26513	0.23582	0.65	0.22524	0.4646	0.38038	0.90116	0.39226	0.34899	0.40657	0.70486	0.67745	0.24097	0.33045	0.43922	0.13497	0.072689	0.41504	0.080371	0.37292	0.13572	0.24264	0.72996	0.20282	0.88763	0.081842	0.90529	0.084688	0.44704	0.47492	0.074486	0.65424	0.91925	0.20877	0.079137
465	0.65688	0.53662	0.34065	0.17955	0.097428	0.31128	0.22923	0.33022	0.072471	0.34166	0.45807	0.24811	0.083144	0.07391	0.22074	0.24554	0.59123	0.23349	0.41041	0.32891	0.85463	0.34035	0.29886	0.46004	0.64522	0.78563	0.25147	0.28126	0.5032	0.11332	0.072939	0.36235	0.075963	0.41575	0.11388	0.20068	0.67011	0.20847	0.83727	0.076849	0.86035	0.078613	0.51354	0.54998	0.075769	0.76263	0.88425	0.21508	0.075236
466	0.76283	0.62707	0.37309	0.14737	0.08688	0.26302	0.2378	0.35981	0.072725	0.37436	0.40384	0.25947	0.077585	0.072492	0.1815	0.2565	0.53361	0.24265	0.35763	0.27959	0.79954	0.29043	0.25146	0.52925	0.58646	0.87033	0.2634	0.23524	0.58501	0.097779	0.073756	0.3114	0.073416	0.47112	0.098167	0.16459	0.61092	0.21451	0.78053	0.073881	0.80598	0.074865	0.59815	0.6432	0.077337	0.85457	0.83446	0.22191	0.073056
467	0.85174	0.72973	0.41422	0.12237	0.079891	0.21851	0.24733	0.39707	0.073544	0.41584	0.35106	0.27246	0.074213	0.072103	0.14884	0.26899	0.4772	0.25289	0.30666	0.23353	0.741	0.24349	0.20818	0.61605	0.52882	0.90668	0.27712	0.19389	0.68285	0.087067	0.074982	0.26295	0.072213	0.54231	0.087328	0.13551	0.55275	0.221	0.72142	0.072374	0.7477	0.072796	0.69786	0.74637	0.079112	0.90192	0.77809	0.22934	0.072117
468	0.89706	0.82396	0.46687	0.10405	0.075491	0.17935	0.25802	0.44457	0.074772	0.46894	0.3002	0.28751	0.072416	0.072458	0.1234	0.28339	0.42204	0.26446	0.25834	0.19227	0.6815	0.20099	0.17062	0.71547	0.47237	0.89721	0.2931	0.15879	0.78303	0.079964	0.076506	0.2183	0.071979	0.63037	0.080133	0.11353	0.49573	0.22802	0.66187	0.071922	0.68825	0.071938	0.79676	0.83659	0.08104	0.90099	0.7192	0.23746	0.072074
469	0.89561	0.88227	0.53395	0.091224	0.072955	0.14695	0.27013	0.50526	0.076296	0.53655	0.25217	0.30517	0.071755	0.073349	0.10473	0.30022	0.36825	0.27767	0.21401	0.15737	0.62219	0.16453	0.14006	0.80934	0.41716	0.86064	0.31196	0.13089	0.85933	0.075485	0.078247	0.17906	0.072446	0.72862	0.075586	0.097776	0.43991	0.23564	0.60277	0.07223	0.62889	0.071953	0.86772	0.88739	0.083082	0.86894	0.65977	0.24642	0.072678
470	0.8638	0.89371	0.6165	0.082583	0.071764	0.12187	0.284	0.58124	0.078036	0.6196	0.20839	0.32619	0.071913	0.074629	0.091655	0.32016	0.31624	0.29295	0.17532	0.12974	0.56363	0.13525	0.11676	0.8714	0.36335	0.81098	0.33457	0.11006	0.89121	0.072895	0.080145	0.14665	0.073418	0.81749	0.072949	0.086941	0.38539	0.24397	0.54453	0.073088	0.57023	0.0726	0.89289	0.89194	0.085213	0.82148	0.6007	0.25637	0.07375
471	0.81673	0.86989	0.70929	0.077002	0.07154	0.10356	0.30008	0.67046	0.079932	0.71251	0.1705	0.35157	0.072663	0.076189	0.082833	0.34411	0.26679	0.31082	0.14361	0.10919	0.50605	0.11318	0.099954	0.88823	0.31138	0.75524	0.36206	0.095288	0.88128	0.071665	0.082162	0.12159	0.074756	0.8722	0.071684	0.079766	0.3325	0.25314	0.48732	0.074343	0.51252	0.073703	0.8781	0.86406	0.087414	0.76678	0.54245	0.26752	0.07516
472	0.76238	0.82709	0.79605	0.073625	0.072013	0.09079	0.31894	0.76153	0.081945	0.79865	0.13976	0.38264	0.073839	0.077953	0.077125	0.37329	0.22121	0.33201	0.11929	0.094653	0.44958	0.097423	0.088344	0.8686	0.26211	0.69701	0.39593	0.085212	0.84576	0.071413	0.084267	0.10333	0.076357	0.8829	0.071407	0.075244	0.28191	0.26331	0.43127	0.075885	0.45591	0.075134	0.83999	0.81926	0.089674	0.70897	0.4852	0.28014	0.076814
473	0.70483	0.77502	0.85417	0.071831	0.07299	0.08221	0.34137	0.8332	0.084046	0.85545	0.11641	0.42109	0.075323	0.079865	0.073659	0.40927	0.18115	0.35748	0.10167	0.084763	0.39436	0.086614	0.080615	0.82832	0.2169	0.63812	0.43806	0.0786	0.79735	0.071867	0.086443	0.090609	0.07815	0.85996	0.071843	0.072629	0.23478	0.27469	0.37654	0.077634	0.40053	0.076803	0.79028	0.7662	0.091986	0.65016	0.42908	0.29457	0.078645
474	0.64622	0.71861	0.8715	0.071174	0.07433	0.076683	0.36837	0.86724	0.086216	0.87139	0.099617	0.46893	0.077029	0.081886	0.071802	0.45395	0.14805	0.38845	0.089453	0.07829	0.34071	0.079475	0.0757	0.77773	0.17741	0.57944	0.49052	0.074487	0.74269	0.07283	0.088675	0.08207	0.080083	0.81828	0.072793	0.071383	0.19272	0.28751	0.32356	0.079534	0.34666	0.078644	0.73497	0.70936	0.094347	0.59142	0.3743	0.31123	0.080605
475	0.5876	0.66047	0.8545	0.071337	0.075931	0.073351	0.40123	0.86291	0.088442	0.85345	0.088048	0.52794	0.078897	0.08399	0.071101	0.50922	0.12247	0.42647	0.081294	0.07428	0.28929	0.074987	0.072806	0.72216	0.14504	0.52143	0.55484	0.072168	0.68526	0.074159	0.090958	0.076576	0.082118	0.76717	0.074112	0.071121	0.1573	0.3021	0.27311	0.081545	0.29493	0.08061	0.67728	0.65109	0.096756	0.53325	0.32128	0.33069	0.082663
476	0.5295	0.60197	0.81672	0.07209	0.077721	0.071593	0.4415	0.83242	0.090716	0.81516	0.080367	0.59837	0.080882	0.086159	0.071232	0.57597	0.10384	0.47326	0.076079	0.072036	0.24123	0.072401	0.071363	0.66447	0.12019	0.46432	0.63	0.071137	0.62691	0.075751	0.093286	0.073271	0.084232	0.71148	0.075698	0.071568	0.12939	0.31886	0.2265	0.08364	0.24642	0.082671	0.61886	0.5926	0.099213	0.47593	0.27088	0.35368	0.084793
477	0.47222	0.54379	0.76811	0.073267	0.079647	0.070964	0.49079	0.78766	0.093034	0.7663	0.075494	0.6763	0.082955	0.08838	0.071962	0.65185	0.090886	0.53023	0.072971	0.071058	0.19811	0.071177	0.070959	0.60619	0.10222	0.40833	0.70944	0.071029	0.56859	0.077534	0.095657	0.071531	0.086406	0.65389	0.077476	0.072525	0.10876	0.33831	0.18537	0.085799	0.20265	0.084802	0.56057	0.53451	0.10172	0.41968	0.22441	0.3811	0.086982
478	0.41599	0.48629	0.71401	0.074749	0.081674	0.071146	0.55007	0.73556	0.095394	0.71207	0.072635	0.75088	0.085095	0.090646	0.073122	0.72833	0.0822	0.59726	0.071375	0.07099	0.16155	0.070932	0.071304	0.54808	0.089778	0.35378	0.77926	0.071588	0.51079	0.079455	0.098074	0.070915	0.088631	0.59575	0.079393	0.073848	0.094249	0.36109	0.15123	0.08801	0.16528	0.08699	0.50286	0.47714	0.10429	0.36478	0.18353	0.41409	0.089219
479	0.36113	0.42973	0.65736	0.07645	0.083777	0.071913	0.61824	0.67984	0.097798	0.65536	0.071218	0.80633	0.087289	0.092954	0.074591	0.79066	0.076613	0.6704	0.070864	0.071576	0.13256	0.071391	0.072188	0.49056	0.081471	0.30131	0.82361	0.072624	0.4538	0.081476	0.10054	0.071108	0.090899	0.5378	0.081412	0.075436	0.084418	0.38798	0.12475	0.090266	0.13543	0.089225	0.446	0.42077	0.10691	0.31179	0.14974	0.45388	0.091498
480	0.30824	0.37443	0.59976	0.07831	0.085938	0.073099	0.68978	0.6226	0.10025	0.59776	0.070834	0.83115	0.089527	0.095301	0.076283	0.82517	0.073246	0.73985	0.071131	0.072633	0.11101	0.072357	0.073458	0.43391	0.076159	0.25198	0.83522	0.074005	0.39789	0.083573	0.10305	0.071882	0.093207	0.48044	0.083507	0.077213	0.078012	0.41991	0.10542	0.092561	0.11309	0.091501	0.39028	0.36571	0.10961	0.2617	0.12362	0.50157	0.093817
481	0.25834	0.32091	0.54209	0.080284	0.088146	0.074587	0.75371	0.56496	0.10274	0.5401	0.071194	0.82523	0.091804	0.097688	0.078135	0.82805	0.071466	0.79187	0.071959	0.074027	0.095796	0.073685	0.075006	0.37846	0.072988	0.20733	0.81862	0.075632	0.3435	0.085728	0.10562	0.073073	0.095553	0.42398	0.08566	0.079126	0.07406	0.45782	0.091955	0.094896	0.097232	0.093815	0.33616	0.31255	0.11238	0.21594	0.10462	0.55745	0.096176
482	0.21291	0.27011	0.48484	0.082342	0.090394	0.07629	0.79706	0.50754	0.10529	0.48287	0.072088	0.79706	0.094119	0.10012	0.080102	0.80589	0.070824	0.81617	0.073188	0.075664	0.085464	0.075275	0.076753	0.32474	0.071351	0.16903	0.78362	0.077436	0.29138	0.08793	0.10824	0.074564	0.097939	0.36877	0.087861	0.081139	0.071865	0.50245	0.082917	0.097268	0.086423	0.096168	0.28443	0.2623	0.11523	0.17622	0.091414	0.61972	0.098573
483	0.17367	0.2234	0.42836	0.084463	0.09268	0.078149	0.81231	0.45074	0.10789	0.42642	0.073365	0.75555	0.096471	0.10259	0.082154	0.76793	0.070998	0.81193	0.074706	0.077474	0.078704	0.077052	0.078643	0.27365	0.07081	0.13828	0.73812	0.079368	0.24271	0.090171	0.11094	0.076269	0.10037	0.31542	0.090101	0.083226	0.070923	0.55374	0.077087	0.099681	0.07932	0.098559	0.23636	0.21641	0.11818	0.14389	0.082574	0.68301	0.10101
484	0.14188	0.1825	0.37304	0.086635	0.095	0.08012	0.80135	0.39491	0.11056	0.37115	0.074916	0.70656	0.098861	0.10511	0.08427	0.721	0.071758	0.78615	0.07643	0.07941	0.074506	0.078962	0.080637	0.22657	0.071057	0.11516	0.68682	0.081392	0.19912	0.092448	0.1137	0.078129	0.10284	0.26492	0.092377	0.085369	0.070884	0.60988	0.073553	0.10214	0.074876	0.10099	0.19361	0.17659	0.12123	0.11928	0.076889	0.73801	0.1035
485	0.11782	0.14885	0.3195	0.088846	0.097356	0.082173	0.77151	0.34057	0.1133	0.31768	0.076664	0.6535	0.10129	0.10769	0.086435	0.66911	0.072938	0.7468	0.078302	0.081437	0.072135	0.080971	0.082707	0.18519	0.07187	0.098726	0.63248	0.083486	0.16224	0.09476	0.11655	0.080099	0.10536	0.21872	0.094687	0.087557	0.07149	0.6663	0.071657	0.10464	0.072331	0.10347	0.15776	0.14418	0.1244	0.1016	0.073458	0.77469	0.10603
486	0.1006	0.12298	0.26872	0.091093	0.099749	0.084287	0.73006	0.28855	0.11612	0.26702	0.078552	0.59839	0.10377	0.11033	0.088641	0.61461	0.074419	0.69962	0.080282	0.083531	0.071071	0.083051	0.084835	0.15101	0.073088	0.087507	0.57671	0.085632	0.13308	0.097105	0.11949	0.082151	0.10793	0.17854	0.097032	0.089782	0.07256	0.71558	0.070932	0.10719	0.071142	0.10599	0.12967	0.11953	0.12771	0.089445	0.071635	0.78736	0.10862
487	0.088807	0.10426	0.22214	0.093373	0.10218	0.086449	0.68189	0.2401	0.11903	0.22061	0.080543	0.54241	0.10629	0.11303	0.090881	0.55892	0.076115	0.64801	0.082339	0.085676	0.070942	0.085186	0.087008	0.12462	0.074595	0.080119	0.52045	0.08782	0.11147	0.099487	0.12254	0.084263	0.11056	0.14575	0.099412	0.092041	0.073961	0.74964	0.071046	0.1098	0.070923	0.10857	0.10902	0.10184	0.13118	0.081382	0.070963	0.77716	0.11128
488	0.081008	0.09132	0.18146	0.095684	0.10466	0.088649	0.62988	0.19688	0.12203	0.18018	0.082607	0.48629	0.10886	0.11581	0.093153	0.50286	0.077966	0.594	0.084455	0.087863	0.071486	0.087363	0.089218	0.10545	0.07631	0.075481	0.4643	0.090044	0.096258	0.10191	0.1257	0.086423	0.11326	0.12073	0.10183	0.094332	0.075601	0.76343	0.071765	0.11248	0.071403	0.11121	0.094572	0.08968	0.13482	0.076262	0.071118	0.74977	0.11399
489	0.076069	0.082692	0.14813	0.098028	0.10718	0.090883	0.57584	0.1605	0.12515	0.14711	0.084728	0.43055	0.11149	0.11867	0.095456	0.44702	0.079927	0.53888	0.086615	0.090084	0.072509	0.089576	0.09146	0.092176	0.078173	0.072795	0.40876	0.092299	0.085971	0.10437	0.129	0.08862	0.11602	0.10275	0.10429	0.096654	0.077409	0.75681	0.072913	0.11522	0.07238	0.11391	0.084847	0.081622	0.13867	0.073233	0.071862	0.7111	0.11679
490	0.073177	0.077171	0.12258	0.10041	0.10976	0.093146	0.52087	0.13188	0.12839	0.12183	0.086892	0.3757	0.11419	0.12162	0.09779	0.3919	0.081968	0.48343	0.088813	0.092336	0.073877	0.091821	0.093733	0.083313	0.080143	0.071508	0.35438	0.094585	0.079263	0.10688	0.13245	0.090849	0.11887	0.090393	0.1068	0.099009	0.079339	0.73377	0.07437	0.11804	0.073715	0.11669	0.078541	0.076507	0.14275	0.071701	0.07303	0.66549	0.11967
491	0.071745	0.073865	0.10416	0.10282	0.11239	0.09544	0.46568	0.11076	0.13178	0.10363	0.089091	0.32245	0.11696	0.12467	0.10016	0.33812	0.084069	0.42822	0.091042	0.094617	0.075491	0.094095	0.096036	0.077628	0.08219	0.071224	0.30198	0.0969	0.075113	0.10943	0.13607	0.093109	0.12182	0.082199	0.10935	0.1014	0.081357	0.69916	0.076048	0.12095	0.075305	0.11954	0.074677	0.07349	0.14712	0.071241	0.074502	0.61574	0.12264
492	0.071354	0.072135	0.091465	0.10528	0.11509	0.097764	0.41085	0.095978	0.13533	0.091111	0.091321	0.27184	0.11981	0.12784	0.10256	0.28662	0.086215	0.37381	0.0933	0.096928	0.07728	0.096398	0.098369	0.074201	0.084294	0.071654	0.25274	0.099248	0.072781	0.11205	0.13989	0.095398	0.12486	0.076987	0.11197	0.10383	0.083439	0.65704	0.077882	0.12396	0.077077	0.12249	0.072549	0.071967	0.15181	0.071546	0.076189	0.56361	0.12572
493	0.071706	0.071528	0.083041	0.10778	0.11786	0.10012	0.357	0.086029	0.13906	0.08281	0.093579	0.22531	0.12276	0.13115	0.105	0.23872	0.088397	0.32095	0.095587	0.09927	0.079194	0.098732	0.10074	0.072381	0.086441	0.072595	0.20826	0.10163	0.071742	0.11473	0.14394	0.097716	0.12802	0.073894	0.11464	0.1063	0.085569	0.61022	0.079829	0.12707	0.078979	0.12555	0.071656	0.071508	0.1569	0.072397	0.078029	0.51025	0.12891
494	0.072592	0.071728	0.07767	0.11033	0.12071	0.10251	0.30496	0.079573	0.14301	0.077527	0.095865	0.18456	0.1258	0.1346	0.10749	0.19609	0.090609	0.27071	0.097903	0.10165	0.081198	0.1011	0.10314	0.071714	0.088624	0.073902	0.1702	0.10405	0.071634	0.11747	0.14826	0.10007	0.1313	0.072317	0.11738	0.10881	0.087737	0.5605	0.081857	0.13032	0.080974	0.12871	0.071652	0.071813	0.16246	0.07364	0.079979	0.45643	0.13225
495	0.07386	0.072505	0.074467	0.11293	0.12365	0.10494	0.25594	0.075598	0.14721	0.074387	0.09818	0.15101	0.12896	0.13823	0.11002	0.16031	0.09285	0.22456	0.10025	0.10406	0.083267	0.1035	0.10558	0.071871	0.090837	0.075471	0.1397	0.1065	0.07219	0.12029	0.15289	0.10245	0.13474	0.071824	0.1202	0.11138	0.089937	0.50909	0.083944	0.1337	0.083037	0.13201	0.072284	0.072667	0.16859	0.075163	0.082009	0.4028	0.13573
496	0.075401	0.073695	0.07281	0.1156	0.1267	0.1074	0.2115	0.073389	0.15171	0.072775	0.10053	0.12521	0.13224	0.14205	0.11261	0.13222	0.095117	0.18418	0.10263	0.10651	0.085385	0.10594	0.10806	0.072617	0.093077	0.077226	0.11685	0.10901	0.073223	0.1232	0.1579	0.10487	0.13834	0.072105	0.12311	0.114	0.092164	0.45688	0.086076	0.13724	0.08515	0.13546	0.073369	0.073911	0.17544	0.076885	0.084097	0.35005	0.1394
497	0.077134	0.075179	0.072258	0.11833	0.12985	0.10992	0.17332	0.072443	0.15655	0.072256	0.1029	0.10656	0.13567	0.14609	0.11525	0.11156	0.097411	0.15098	0.10504	0.109	0.087541	0.10842	0.11059	0.073784	0.095343	0.079113	0.10068	0.11156	0.074594	0.12621	0.16336	0.10733	0.14213	0.07294	0.12611	0.11669	0.094417	0.40457	0.088243	0.14096	0.087302	0.13907	0.074779	0.075433	0.18318	0.078748	0.08623	0.2991	0.14326
498	0.079006	0.076872	0.072497	0.12114	0.13313	0.11248	0.14257	0.072399	0.1618	0.072518	0.10532	0.093712	0.13927	0.1504	0.11796	0.097144	0.099733	0.12548	0.1075	0.11154	0.089728	0.11095	0.11317	0.075251	0.097636	0.081095	0.089704	0.11416	0.076206	0.12932	0.16936	0.10983	0.14615	0.074169	0.12922	0.11944	0.096697	0.35289	0.09044	0.14489	0.089486	0.14288	0.076419	0.077153	0.19207	0.080713	0.088396	0.25121	0.14735
499	0.080976	0.078714	0.073301	0.12403	0.13656	0.1151	0.11943	0.073002	0.16754	0.073338	0.10777	0.085171	0.14305	0.15502	0.12074	0.087462	0.10209	0.10707	0.11	0.11414	0.091942	0.11353	0.1158	0.076932	0.099956	0.083145	0.082511	0.11683	0.077991	0.13255	0.17603	0.11238	0.15042	0.07568	0.13244	0.12227	0.099003	0.30279	0.092663	0.14907	0.091697	0.14691	0.078222	0.079015	0.20247	0.082751	0.090592	0.208	0.15172
500	0.083017	0.080662	0.07451	0.12701	0.14015	0.11778	0.10294	0.074067	0.17389	0.074558	0.11026	0.079723	0.14705	0.16	0.1236	0.081201	0.10447	0.094364	0.11254	0.11679	0.094182	0.11616	0.11851	0.078765	0.10231	0.085247	0.078021	0.11956	0.079898	0.13592	0.18353	0.11499	0.15499	0.077393	0.13581	0.12519	0.10134	0.25552	0.094911	0.15353	0.093933	0.15119	0.080144	0.080977	0.2149	0.084843	0.092814	0.17106	0.1564
501	0.085111	0.082687	0.076006	0.13009	0.14392	0.12053	0.09173	0.07546	0.18099	0.076062	0.11281	0.076469	0.15131	0.16541	0.12655	0.077369	0.10689	0.085938	0.11514	0.11951	0.096445	0.11886	0.12128	0.080706	0.10469	0.087386	0.075449	0.12237	0.081893	0.13945	0.1921	0.11765	0.15991	0.079247	0.13933	0.1282	0.1037	0.21263	0.097184	0.15832	0.096193	0.15578	0.082148	0.083012	0.23013	0.086975	0.09506	0.14146	0.16145
502	0.087244	0.084767	0.077705	0.1333	0.14791	0.12335	0.084375	0.077087	0.18903	0.077768	0.1154	0.074779	0.15585	0.17135	0.1296	0.075267	0.10935	0.08057	0.1178	0.1223	0.098734	0.12163	0.12413	0.082725	0.10711	0.089557	0.074246	0.12525	0.083951	0.14315	0.20204	0.12039	0.16525	0.081204	0.14302	0.13132	0.1061	0.1757	0.099482	0.1635	0.098479	0.16072	0.084214	0.0851	0.24934	0.08914	0.09733	0.11926	0.16695
503	0.089409	0.08689	0.07955	0.13663	0.15214	0.12626	0.079765	0.07888	0.19827	0.079617	0.11806	0.074207	0.16075	0.17792	0.13276	0.0744	0.11186	0.077374	0.12052	0.12517	0.10105	0.12448	0.12706	0.0848	0.10957	0.091755	0.074021	0.12823	0.086056	0.14705	0.21381	0.12319	0.17109	0.083233	0.14691	0.13456	0.10854	0.14585	0.10181	0.16915	0.10079	0.16608	0.086325	0.087228	0.27444	0.091331	0.099626	0.10352	0.17298
504	0.0916	0.089045	0.081498	0.14011	0.15666	0.12926	0.07711	0.08079	0.2091	0.081568	0.12078	0.074432	0.16605	0.18529	0.13604	0.074415	0.11441	0.075726	0.12332	0.12813	0.1034	0.12742	0.1301	0.086918	0.11207	0.093976	0.074494	0.13132	0.088198	0.15118	0.22807	0.12608	0.17755	0.085316	0.15104	0.13793	0.11102	0.12326	0.10416	0.17537	0.10313	0.17195	0.088471	0.089388	0.30859	0.093547	0.10195	0.092835	0.17968
505	0.093815	0.091228	0.08352	0.14376	0.16152	0.13237	0.075841	0.082785	0.22203	0.083591	0.12357	0.075221	0.17183	0.19365	0.13947	0.075054	0.11702	0.075179	0.1262	0.13119	0.10577	0.13045	0.13324	0.089069	0.11462	0.09622	0.07546	0.13451	0.090368	0.15558	0.24578	0.12906	0.18477	0.087439	0.15543	0.14146	0.11355	0.10714	0.10655	0.18229	0.10551	0.17843	0.090645	0.091575	0.35698	0.095786	0.1043	0.085834	0.18719
506	0.096053	0.093434	0.085596	0.1476	0.16677	0.13559	0.075574	0.084841	0.23787	0.085669	0.12644	0.076418	0.17822	0.2033	0.14305	0.076144	0.11968	0.075424	0.12916	0.13436	0.10818	0.13359	0.1365	0.091248	0.11722	0.098488	0.076782	0.13784	0.092564	0.16029	0.26853	0.13214	0.19294	0.089594	0.16013	0.14516	0.11612	0.096094	0.10898	0.19009	0.10791	0.18567	0.092845	0.093786	0.42877	0.098049	0.10669	0.081472	0.19574
507	0.098314	0.095664	0.087713	0.15165	0.1725	0.13894	0.07602	0.086943	0.25784	0.087788	0.1294	0.077903	0.18533	0.21463	0.14681	0.077554	0.12242	0.076234	0.13223	0.13765	0.11063	0.13685	0.13991	0.09345	0.11988	0.10078	0.078357	0.1413	0.094782	0.16537	0.29881	0.13533	0.20232	0.091775	0.16519	0.14906	0.11875	0.08881	0.11144	0.19899	0.11036	0.19386	0.095067	0.096019	0.53844	0.10034	0.10911	0.079007	0.20562
508	0.1006	0.097916	0.089863	0.15596	0.17881	0.14245	0.076969	0.08908	0.28386	0.089938	0.13245	0.079592	0.19336	0.22822	0.15078	0.079189	0.12522	0.077442	0.1354	0.14108	0.11312	0.14024	0.14346	0.095676	0.1226	0.1031	0.08011	0.14494	0.097024	0.17089	0.34078	0.13865	0.21329	0.093981	0.1707	0.15318	0.12144	0.08426	0.11395	0.20932	0.11284	0.20328	0.097312	0.098275	0.70112	0.10265	0.11157	0.077889	0.21725
509	0.10291	0.10019	0.092039	0.16056	0.18582	0.14611	0.078277	0.091245	0.31908	0.092115	0.13562	0.081427	0.20256	0.24493	0.15499	0.080985	0.1281	0.078935	0.1387	0.14468	0.11566	0.14379	0.14719	0.097924	0.1254	0.10545	0.08199	0.14875	0.099288	0.17694	0.40154	0.14211	0.22638	0.096208	0.17672	0.15756	0.1242	0.081663	0.11651	0.22155	0.11538	0.21428	0.09958	0.10055	0.89772	0.10499	0.11407	0.077728	0.23124
510	0.10525	0.10249	0.094238	0.1655	0.19371	0.14997	0.079839	0.093435	0.36878	0.094316	0.13891	0.083365	0.21326	0.26607	0.15947	0.082896	0.13107	0.080628	0.14214	0.14845	0.11825	0.14751	0.15112	0.10019	0.12828	0.10783	0.083961	0.15278	0.10158	0.18362	0.49262	0.14574	0.24237	0.098458	0.18338	0.16225	0.12703	0.080453	0.11912	0.23635	0.11796	0.22739	0.10187	0.10286	1.0327	0.10736	0.11662	0.078246	0.24849
511	0.10762	0.10482	0.09646	0.17085	0.2027	0.15405	0.081583	0.095648	0.44177	0.096538	0.14234	0.085377	0.22596	0.29375	0.16426	0.084888	0.13414	0.082465	0.14574	0.15242	0.1209	0.15142	0.15527	0.10249	0.13124	0.11025	0.085998	0.15706	0.10389	0.1911	0.62907	0.14954	0.26246	0.10073	0.19082	0.1673	0.12995	0.080226	0.12179	0.25473	0.1206	0.24341	0.10419	0.10519	1.0521	0.10977	0.11923	0.079247	0.2704
512	0.11003	0.10718	0.098704	0.17667	0.21313	0.15837	0.083454	0.097882	0.55132	0.098782	0.14592	0.087444	0.24138	0.33135	0.16943	0.08694	0.13733	0.084403	0.14951	0.15663	0.12361	0.15556	0.15969	0.10481	0.1343	0.1127	0.088083	0.16161	0.10623	0.19957	0.81131	0.15356	0.28851	0.10303	0.19925	0.17277	0.13296	0.080698	0.12452	0.27827	0.1233	0.2635	0.10654	0.10756	1.012	0.11221	0.12189	0.08059	0.29918
513	0.11247	0.10957	0.10097	0.18308	0.22544	0.16299	0.085418	0.10014	0.7092	0.10105	0.14967	0.089552	0.2606	0.38451	0.17505	0.089037	0.14063	0.086416	0.15349	0.16111	0.12639	0.15996	0.16441	0.10716	0.13747	0.11519	0.090205	0.1665	0.10861	0.2093	0.97897	0.15781	0.32354	0.10535	0.20893	0.17874	0.13607	0.081664	0.12732	0.30944	0.12607	0.28952	0.10892	0.10995	0.95532	0.1147	0.12461	0.082175	0.33842
514	0.11495	0.112	0.10326	0.1902	0.24029	0.16794	0.087448	0.10242	0.89309	0.10334	0.15363	0.091692	0.28529	0.4624	0.1812	0.091168	0.14407	0.088482	0.1577	0.1659	0.12924	0.16466	0.16949	0.10955	0.14076	0.11774	0.092356	0.17177	0.11102	0.22067	1.0444	0.16234	0.37249	0.10771	0.22023	0.18532	0.13929	0.082981	0.13021	0.35235	0.12891	0.32443	0.11133	0.11239	0.89402	0.11723	0.12741	0.083934	0.39406
515	0.11748	0.11446	0.10558	0.1982	0.25866	0.17329	0.089527	0.10472	1.018	0.10566	0.15781	0.093859	0.31811	0.57794	0.18799	0.093327	0.14766	0.090589	0.16217	0.17106	0.13218	0.16971	0.175	0.11197	0.14418	0.12033	0.094533	0.1775	0.11346	0.23424	1.0233	0.16719	0.44347	0.1101	0.2337	0.19265	0.14264	0.084548	0.13317	0.4137	0.13183	0.37311	0.11379	0.11486	0.83265	0.11981	0.13028	0.085815	0.47564
516	0.12005	0.11697	0.10792	0.20731	0.28203	0.17911	0.091645	0.10706	1.0361	0.10801	0.16225	0.09605	0.36341	0.73897	0.19558	0.09551	0.15143	0.092728	0.16696	0.17666	0.1352	0.17518	0.181	0.11442	0.14775	0.12298	0.096733	0.18378	0.11595	0.25078	0.9727	0.17241	0.54841	0.11252	0.25011	0.20091	0.14614	0.086292	0.13624	0.50394	0.13485	0.44345	0.11628	0.11737	0.77279	0.12245	0.13324	0.087785	0.59599
517	0.12269	0.11953	0.1103	0.21784	0.31277	0.1855	0.093793	0.10942	0.99769	0.11038	0.167	0.098263	0.42823	0.91329	0.20416	0.097716	0.1554	0.094895	0.17211	0.18277	0.13834	0.18114	0.18761	0.11692	0.1515	0.12569	0.098955	0.19074	0.11848	0.2715	0.91309	0.17809	0.69762	0.11498	0.27064	0.21035	0.14979	0.088162	0.13941	0.63549	0.13797	0.54706	0.11882	0.11994	0.71495	0.12514	0.13629	0.089819	0.75997
518	0.12538	0.12214	0.11271	0.23024	0.35465	0.19258	0.095967	0.11182	0.94227	0.1128	0.1721	0.1005	0.52318	1.0174	0.21401	0.099944	0.15959	0.097085	0.17768	0.18952	0.14158	0.18769	0.19497	0.11947	0.15544	0.12847	0.1012	0.19851	0.12107	0.29825	0.85154	0.18429	0.87252	0.11748	0.29711	0.2213	0.15362	0.090125	0.14271	0.80581	0.1412	0.69404	0.12141	0.12256	0.65932	0.1279	0.13945	0.091902	0.92847
519	0.12813	0.1248	0.11516	0.24513	0.41378	0.20052	0.098164	0.11425	0.88131	0.11525	0.17761	0.10276	0.65932	1.0232	0.22548	0.1022	0.16404	0.099298	0.18377	0.19703	0.14496	0.19497	0.20325	0.12207	0.1596	0.13132	0.10347	0.20732	0.1237	0.33396	0.79075	0.19114	0.99822	0.12003	0.33241	0.23424	0.15766	0.092155	0.14613	0.96001	0.14456	0.86664	0.12406	0.12523	0.60586	0.13074	0.14272	0.094023	1.0194
520	0.13096	0.12753	0.11765	0.26344	0.4995	0.20952	0.10038	0.11672	0.8199	0.11774	0.18362	0.10504	0.82818	0.98211	0.23911	0.10447	0.16879	0.10153	0.19047	0.20551	0.14847	0.20314	0.21269	0.12472	0.16401	0.13426	0.10576	0.21744	0.1264	0.38335	0.73163	0.19878	1.0242	0.12263	0.38116	0.24987	0.16193	0.094236	0.1497	1.0234	0.14805	0.99283	0.12676	0.12797	0.55441	0.13365	0.14612	0.096175	1.017
521	0.13387	0.13033	0.12019	0.28658	0.62278	0.21988	0.10263	0.11924	0.75969	0.12028	0.19023	0.10734	0.96926	0.92613	0.25566	0.10677	0.17389	0.10379	0.19793	0.21519	0.15215	0.21245	0.22362	0.12743	0.16872	0.13729	0.10808	0.22927	0.12916	0.45385	0.67452	0.20741	0.99047	0.12529	0.45066	0.26919	0.16647	0.096357	0.15344	1.0059	0.1517	1.0212	0.12954	0.13078	0.50471	0.13666	0.14967	0.098354	0.97367
522	0.13686	0.1332	0.12277	0.31671	0.78252	0.23201	0.10489	0.1218	0.70128	0.12286	0.19756	0.10968	1.0181	0.8652	0.27625	0.10909	0.1794	0.10607	0.20631	0.22642	0.156	0.22319	0.2365	0.13021	0.17376	0.14041	0.11042	0.24334	0.132	0.5558	0.61948	0.21728	0.93716	0.12801	0.55118	0.29375	0.17132	0.098512	0.15737	0.95795	0.15554	0.9888	0.13238	0.13367	0.45647	0.13976	0.15339	0.10056	0.91688
523	0.13996	0.13616	0.12541	0.35727	0.93389	0.24647	0.10718	0.12442	0.64489	0.1255	0.20579	0.11204	0.99494	0.80395	0.30261	0.11145	0.1854	0.10838	0.21587	0.2397	0.16006	0.23581	0.25199	0.13307	0.1792	0.14365	0.1128	0.26045	0.13491	0.69682	0.56642	0.22876	0.877	0.13079	0.69072	0.32595	0.17654	0.10069	0.16152	0.89956	0.15957	0.9361	0.13531	0.13664	0.40941	0.14297	0.15728	0.10278	0.85587
524	0.14315	0.1392	0.12811	0.41366	1.0066	0.26411	0.1095	0.12709	0.59048	0.1282	0.21514	0.11444	0.94542	0.74383	0.33744	0.11384	0.19198	0.11072	0.22693	0.2557	0.16435	0.25093	0.27106	0.136	0.18511	0.14701	0.11521	0.2818	0.13791	0.85828	0.51513	0.24234	0.81566	0.13365	0.8523	0.36956	0.18218	0.1029	0.1659	0.83833	0.16383	0.87616	0.13832	0.1397	0.36335	0.1463	0.16139	0.10504	0.7947
525	0.14647	0.14235	0.13087	0.49393	0.99785	0.28618	0.11185	0.12982	0.53792	0.13097	0.22592	0.11688	0.88662	0.68542	0.38493	0.11626	0.19926	0.11309	0.23994	0.27546	0.16891	0.26946	0.29514	0.13903	0.19158	0.15051	0.11766	0.30918	0.14101	0.97588	0.46534	0.25875	0.75515	0.13659	0.97286	0.43048	0.18832	0.10514	0.17057	0.77738	0.16835	0.81486	0.14144	0.14287	0.31832	0.14976	0.16573	0.10731	0.7347
526	0.14991	0.14561	0.13371	0.60747	0.95359	0.31456	0.11423	0.13262	0.48697	0.13381	0.23855	0.11935	0.82544	0.62892	0.45159	0.11872	0.20742	0.11549	0.25555	0.30051	0.17378	0.29275	0.32648	0.14215	0.19873	0.15416	0.12015	0.34539	0.14421	1.0046	0.41679	0.27906	0.69619	0.13962	1.0048	0.51722	0.19508	0.1074	0.17557	0.71774	0.17317	0.75428	0.14466	0.14615	0.27468	0.15337	0.17035	0.10961	0.67642
527	0.15351	0.149	0.13662	0.75454	0.89684	0.35218	0.11664	0.1355	0.43737	0.13672	0.25365	0.12187	0.76459	0.5743	0.54624	0.12123	0.21665	0.11792	0.27472	0.33321	0.179	0.32287	0.36854	0.14538	0.20672	0.15798	0.12269	0.3948	0.14753	0.97485	0.36932	0.30485	0.63907	0.14275	0.97647	0.63833	0.20257	0.10968	0.18094	0.65986	0.17834	0.69519	0.148	0.14955	0.23328	0.15715	0.17528	0.11194	0.62002
528	0.15726	0.15252	0.13961	0.90078	0.83612	0.40361	0.11909	0.13846	0.38892	0.13972	0.27207	0.12443	0.70506	0.5214	0.67564	0.12378	0.22726	0.1204	0.29885	0.37723	0.18464	0.36303	0.42665	0.14873	0.21573	0.162	0.12527	0.46397	0.15098	0.92362	0.32297	0.33859	0.58381	0.14599	0.92574	0.78866	0.21097	0.112	0.18677	0.60384	0.18392	0.6379	0.15147	0.1531	0.19536	0.16112	0.18057	0.1143	0.56545
529	0.1612	0.1562	0.1427	0.98314	0.77509	0.4756	0.12158	0.14151	0.34159	0.14281	0.29511	0.12704	0.64722	0.47001	0.82643	0.12637	0.23963	0.12292	0.33011	0.43814	0.19078	0.41816	0.50847	0.15221	0.22604	0.16624	0.12791	0.56143	0.15457	0.86452	0.27813	0.38408	0.53028	0.14934	0.8668	0.92436	0.2205	0.11434	0.19312	0.54959	0.18999	0.58243	0.15509	0.1568	0.16239	0.16529	0.1863	0.11669	0.51256
530	0.16535	0.16005	0.1459	0.98626	0.71504	0.57646	0.12411	0.14465	0.29561	0.14601	0.32474	0.12971	0.59117	0.41989	0.94613	0.12903	0.25433	0.12548	0.37179	0.52371	0.19751	0.49538	0.62195	0.15584	0.23802	0.17073	0.1306	0.69216	0.15833	0.80349	0.23564	0.44705	0.47828	0.15283	0.8058	0.98715	0.23148	0.11672	0.20011	0.49696	0.19663	0.52867	0.15888	0.16068	0.13543	0.16972	0.19254	0.11912	0.46113
531	0.16974	0.16409	0.1492	0.94778	0.65654	0.70947	0.12669	0.14791	0.25167	0.14932	0.36392	0.13244	0.53683	0.37094	0.98723	0.13174	0.27214	0.1281	0.42891	0.64105	0.20496	0.60264	0.76423	0.15964	0.25218	0.17551	0.13336	0.83894	0.16227	0.74282	0.1968	0.53523	0.4276	0.15647	0.74509	0.97785	0.2443	0.11913	0.20787	0.44571	0.20397	0.47642	0.16285	0.16476	0.1147	0.17442	0.19938	0.12159	0.41095
532	0.17439	0.16835	0.15264	0.8937	0.59974	0.85321	0.12933	0.15128	0.21094	0.15276	0.4172	0.13524	0.48402	0.32324	0.96635	0.13451	0.29425	0.13077	0.50852	0.78382	0.21328	0.73978	0.89958	0.16362	0.26925	0.18062	0.13618	0.94847	0.16641	0.68338	0.16309	0.6549	0.3781	0.16028	0.68559	0.93481	0.25958	0.12157	0.21659	0.39568	0.21216	0.42548	0.16703	0.16907	0.09958	0.17944	0.20696	0.1241	0.36195
533	0.17936	0.17287	0.15621	0.83402	0.54461	0.9532	0.13202	0.15479	0.1749	0.15634	0.49104	0.13811	0.43255	0.27723	0.91917	0.13736	0.32238	0.1335	0.61772	0.9117	0.22269	0.87787	0.97197	0.16782	0.29028	0.18612	0.13908	0.98085	0.17079	0.62553	0.1356	0.79705	0.32985	0.16427	0.62767	0.87909	0.27814	0.12406	0.22649	0.34685	0.2214	0.37574	0.17145	0.17363	0.089024	0.18483	0.21545	0.12665	0.31427
534	0.18468	0.17767	0.15994	0.77315	0.491	0.97711	0.13477	0.15845	0.14485	0.16007	0.59263	0.14105	0.38229	0.23384	0.86194	0.14028	0.35916	0.1363	0.75376	0.97259	0.23347	0.96176	0.97207	0.17225	0.31685	0.19207	0.14206	0.95672	0.17543	0.56933	0.11453	0.91859	0.28326	0.16847	0.57141	0.81899	0.30122	0.12658	0.2379	0.2995	0.23197	0.32729	0.17614	0.17848	0.081947	0.19065	0.22505	0.12925	0.26847
535	0.19043	0.1828	0.16384	0.71279	0.43875	0.94928	0.13759	0.16227	0.12135	0.16398	0.72249	0.14408	0.33333	0.19445	0.80154	0.14328	0.40852	0.13916	0.88475	0.96553	0.246	0.97185	0.93363	0.17696	0.35129	0.19856	0.14513	0.90863	0.18038	0.51471	0.099222	0.97131	0.2392	0.1729	0.51673	0.75817	0.33065	0.12916	0.25126	0.25433	0.24423	0.28057	0.18115	0.18367	0.077439	0.19699	0.23607	0.1319	0.22558
536	0.19667	0.18832	0.16794	0.65367	0.38775	0.8999	0.14048	0.16628	0.10399	0.16809	0.85657	0.14721	0.28606	0.16056	0.74083	0.14638	0.47609	0.14211	0.95889	0.92446	0.26081	0.93808	0.88004	0.18198	0.39714	0.20569	0.1483	0.85126	0.18568	0.4615	0.088563	0.95984	0.19901	0.17761	0.46346	0.69803	0.36917	0.13178	0.26717	0.21254	0.25869	0.2365	0.18652	0.18926	0.074804	0.20394	0.24891	0.13461	0.18704
537	0.2035	0.19428	0.17226	0.59604	0.33806	0.84216	0.14345	0.1705	0.09175	0.17242	0.9449	0.15044	0.24137	0.1332	0.68096	0.14957	0.56841	0.14513	0.9634	0.86994	0.27867	0.88648	0.82081	0.18736	0.45945	0.2136	0.15157	0.79094	0.1914	0.40958	0.081435	0.91722	0.16423	0.18264	0.41149	0.63918	0.42085	0.13446	0.28651	0.17566	0.27606	0.19646	0.19231	0.19531	0.07353	0.21162	0.26411	0.13739	0.15433
538	0.21103	0.20078	0.17684	0.53993	0.29009	0.78182	0.1465	0.17495	0.083448	0.177	0.96287	0.15378	0.2006	0.11244	0.62243	0.15287	0.6879	0.14825	0.9279	0.81051	0.30066	0.82802	0.76019	0.19316	0.54452	0.22247	0.15497	0.73035	0.19759	0.35894	0.076903	0.86221	0.13597	0.18802	0.36079	0.58182	0.49128	0.13719	0.31055	0.14501	0.29738	0.16198	0.1986	0.2019	0.07324	0.22021	0.28247	0.14023	0.12829
539	0.21942	0.20791	0.18169	0.48526	0.24471	0.72131	0.14965	0.17967	0.078066	0.18187	0.93406	0.15724	0.1653	0.097484	0.56537	0.1563	0.81851	0.15148	0.8759	0.74993	0.32836	0.76758	0.69991	0.19946	0.65631	0.23252	0.15849	0.67056	0.20436	0.30984	0.074258	0.80268	0.1144	0.19382	0.31161	0.52596	0.5864	0.13999	0.34114	0.12114	0.32415	0.13412	0.20547	0.20915	0.073666	0.22991	0.30511	0.14314	0.10879
540	0.22887	0.21579	0.18688	0.43192	0.20325	0.66164	0.15291	0.1847	0.074809	0.18707	0.88501	0.16084	0.13662	0.087153	0.50977	0.15985	0.91783	0.15481	0.81748	0.68977	0.36412	0.70721	0.6407	0.20635	0.78496	0.24405	0.16215	0.61206	0.2118	0.26295	0.072979	0.74216	0.098804	0.20011	0.26462	0.47149	0.70641	0.14286	0.38103	0.10358	0.35858	0.11297	0.21306	0.21718	0.074611	0.241	0.33368	0.14613	0.094883
541	0.23964	0.22461	0.19245	0.37986	0.16729	0.60324	0.15627	0.19008	0.073088	0.19265	0.8278	0.1646	0.11475	0.080295	0.45553	0.16356	0.95238	0.15826	0.75718	0.6307	0.41136	0.64776	0.58285	0.21394	0.89443	0.2575	0.16598	0.55498	0.22008	0.21947	0.072689	0.68209	0.087992	0.20699	0.22099	0.41832	0.83171	0.1458	0.43417	0.091238	0.40391	0.097747	0.2215	0.22618	0.075932	0.25387	0.37061	0.14921	0.085359
542	0.25207	0.23458	0.19846	0.32928	0.13801	0.54624	0.15976	0.19588	0.072478	0.19868	0.76785	0.16852	0.098941	0.075973	0.40257	0.16742	0.93405	0.16185	0.69692	0.57297	0.47476	0.5896	0.52641	0.22238	0.94518	0.27343	0.16999	0.4993	0.22937	0.18093	0.073114	0.62311	0.080785	0.21457	0.18224	0.36647	0.92007	0.14882	0.50571	0.0829	0.46464	0.087231	0.231	0.23636	0.077526	0.26904	0.4194	0.15239	0.079099
543	0.26666	0.24598	0.20499	0.2807	0.11565	0.49061	0.16339	0.20215	0.072673	0.20523	0.70755	0.17263	0.087989	0.073489	0.35099	0.17147	0.89004	0.16558	0.63755	0.51662	0.55961	0.53282	0.47132	0.23188	0.93791	0.29265	0.17419	0.44494	0.23992	0.14877	0.074057	0.56545	0.076215	0.22299	0.14982	0.31621	0.94537	0.15193	0.60043	0.077509	0.54607	0.080248	0.24181	0.24805	0.079321	0.28724	0.48477	0.15566	0.075214
544	0.28406	0.25921	0.21214	0.23518	0.099476	0.43629	0.16717	0.209	0.073449	0.2124	0.64794	0.17696	0.080692	0.072329	0.30117	0.17573	0.83522	0.16948	0.5794	0.46161	0.66777	0.47738	0.41752	0.24267	0.89905	0.31632	0.17862	0.39188	0.25205	0.12362	0.075376	0.50914	0.073552	0.23245	0.12441	0.2682	0.92287	0.15513	0.71627	0.074254	0.65101	0.075843	0.25427	0.26164	0.081264	0.30951	0.57168	0.15905	0.073045
545	0.30522	0.27481	0.22003	0.19418	0.088267	0.38327	0.17112	0.21652	0.074646	0.22032	0.58945	0.18152	0.076063	0.072126	0.25395	0.18021	0.77623	0.17356	0.52257	0.40788	0.78728	0.42323	0.36508	0.25511	0.84658	0.3461	0.18331	0.34027	0.26622	0.10508	0.076967	0.45415	0.072264	0.24319	0.10565	0.22363	0.87754	0.15844	0.83233	0.07254	0.77029	0.073301	0.26887	0.2777	0.083318	0.33734	0.68084	0.16256	0.072114
546	0.33146	0.29351	0.22882	0.15927	0.080792	0.33178	0.17525	0.22486	0.076148	0.22914	0.53223	0.18636	0.07336	0.072615	0.21066	0.18495	0.71616	0.17785	0.46705	0.35554	0.88474	0.37042	0.3143	0.26965	0.78853	0.38436	0.18828	0.29061	0.28302	0.09205	0.078756	0.40044	0.07197	0.25554	0.092442	0.18407	0.82242	0.16186	0.91055	0.071937	0.8732	0.072101	0.28624	0.29703	0.085457	0.37287	0.79806	0.16621	0.072076
547	0.3647	0.31636	0.23871	0.13143	0.07604	0.28238	0.1796	0.23418	0.077871	0.23907	0.47631	0.19151	0.072046	0.073604	0.17291	0.18999	0.65637	0.18237	0.4128	0.30499	0.92812	0.31925	0.26592	0.28693	0.72871	0.43444	0.19358	0.24386	0.3033	0.083232	0.080691	0.34818	0.072393	0.26996	0.08349	0.15097	0.76349	0.1654	0.93068	0.072138	0.92508	0.071871	0.3073	0.32073	0.087666	0.41912	0.88915	0.17001	0.072685
548	0.40765	0.34486	0.24996	0.11058	0.073252	0.23616	0.18418	0.24474	0.079756	0.25038	0.42165	0.19701	0.071733	0.074954	0.14199	0.19536	0.59748	0.18715	0.35995	0.25707	0.91945	0.27042	0.22117	0.30783	0.66884	0.50051	0.19927	0.20148	0.32827	0.07751	0.082734	0.29781	0.073334	0.28705	0.077673	0.12505	0.70358	0.16907	0.90734	0.072918	0.92264	0.07234	0.33332	0.35038	0.089932	0.48004	0.92572	0.17397	0.07376
549	0.46388	0.3811	0.26293	0.095737	0.071878	0.19461	0.18903	0.25682	0.08176	0.26341	0.36835	0.20292	0.072143	0.076565	0.11828	0.20113	0.53973	0.19222	0.30888	0.2131	0.88144	0.22513	0.18166	0.3336	0.60969	0.58632	0.20539	0.16506	0.35963	0.074027	0.084861	0.25026	0.074649	0.30768	0.07412	0.10594	0.64396	0.1729	0.86252	0.074117	0.88766	0.073314	0.36614	0.38822	0.09225	0.55972	0.91311	0.17812	0.075172
550	0.53741	0.42799	0.2781	0.085586	0.071523	0.15932	0.19418	0.27084	0.083854	0.27866	0.31678	0.2093	0.073074	0.078366	0.1011	0.20734	0.4832	0.19764	0.26042	0.17471	0.83012	0.18497	0.14883	0.36599	0.55159	0.69045	0.21203	0.13574	0.39975	0.072154	0.087053	0.20693	0.076234	0.33303	0.072197	0.092508	0.58519	0.17689	0.80813	0.075618	0.83771	0.074652	0.40828	0.4373	0.094616	0.65893	0.87354	0.18248	0.076828
551	0.63021	0.48919	0.29611	0.078908	0.071902	0.13126	0.19968	0.28735	0.086018	0.29678	0.26767	0.21624	0.074381	0.080305	0.089168	0.21408	0.4279	0.20343	0.21588	0.14324	0.77301	0.15142	0.1233	0.40745	0.49467	0.79758	0.21928	0.1136	0.45183	0.071439	0.0893	0.16945	0.078015	0.3648	0.071447	0.083415	0.52751	0.18107	0.74982	0.077338	0.78117	0.076254	0.4631	0.50136	0.09703	0.76726	0.82167	0.18706	0.07866
552	0.73578	0.56812	0.31786	0.074743	0.072811	0.1103	0.20557	0.30711	0.088239	0.31868	0.22231	0.22384	0.07596	0.082347	0.081197	0.22144	0.37395	0.20968	0.1769	0.11908	0.71382	0.12521	0.10459	0.46119	0.43895	0.87742	0.22724	0.097751	0.51953	0.07156	0.091595	0.13905	0.079938	0.4053	0.071542	0.077509	0.47101	0.18544	0.69032	0.079217	0.72216	0.078047	0.53428	0.58354	0.099493	0.85774	0.76444	0.1919	0.080622
553	0.8321	0.66449	0.3446	0.072384	0.074102	0.095435	0.21193	0.33117	0.090509	0.34561	0.1823	0.23223	0.077735	0.084466	0.076103	0.22954	0.32171	0.21645	0.14487	0.10157	0.65431	0.10593	0.091503	0.53071	0.38455	0.90764	0.23607	0.086864	0.60528	0.072282	0.093935	0.11596	0.081967	0.45759	0.072245	0.0739	0.41574	0.19004	0.63093	0.081212	0.66264	0.079978	0.6236	0.68228	0.10201	0.90283	0.7053	0.19704	0.08268
554	0.8902	0.76719	0.37806	0.071321	0.075668	0.085293	0.21882	0.36099	0.092824	0.37934	0.14911	0.24157	0.079652	0.086648	0.073079	0.23852	0.27193	0.22383	0.12022	0.089427	0.5953	0.092396	0.082686	0.61782	0.33177	0.89393	0.24595	0.079662	0.70532	0.073438	0.096319	0.099354	0.084076	0.52504	0.073388	0.07194	0.36188	0.1949	0.57224	0.083294	0.60353	0.082011	0.72528	0.78389	0.10458	0.90011	0.64589	0.2025	0.084811
555	0.89969	0.85095	0.42057	0.071191	0.077432	0.078636	0.22634	0.39857	0.09518	0.4222	0.12336	0.25206	0.081674	0.088879	0.071539	0.24857	0.22586	0.23194	0.10233	0.081307	0.53717	0.083258	0.076988	0.71733	0.28129	0.85524	0.25711	0.075127	0.80272	0.074906	0.098748	0.087905	0.086247	0.60955	0.074846	0.071165	0.30989	0.20004	0.51452	0.085444	0.54526	0.084122	0.81949	0.86159	0.10721	0.8671	0.58699	0.20835	0.087
556	0.87396	0.89172	0.475	0.071733	0.07934	0.074493	0.23461	0.44649	0.09758	0.47708	0.10453	0.26397	0.083775	0.091155	0.071066	0.25994	0.18512	0.24092	0.089904	0.076113	0.48008	0.07733	0.073532	0.81085	0.23427	0.80459	0.26986	0.072504	0.87038	0.076599	0.10122	0.080302	0.088468	0.70674	0.076532	0.071242	0.26065	0.2055	0.4579	0.087647	0.48801	0.086294	0.87906	0.8941	0.10992	0.8192	0.52896	0.21463	0.089237
557	0.82984	0.88802	0.54417	0.072758	0.081353	0.072153	0.24377	0.5077	0.10002	0.54678	0.09139	0.27765	0.085937	0.093471	0.071362	0.27293	0.15123	0.25095	0.081589	0.07302	0.42416	0.073712	0.071685	0.87213	0.19232	0.7484	0.28462	0.071254	0.89211	0.078454	0.10375	0.075482	0.090733	0.79993	0.078382	0.071933	0.21554	0.21133	0.40251	0.089896	0.43191	0.088515	0.89218	0.88416	0.11269	0.76429	0.47196	0.22142	0.091517
558	0.77687	0.85557	0.62861	0.074131	0.083445	0.071106	0.25402	0.58422	0.10251	0.63167	0.082553	0.29357	0.088149	0.095827	0.072209	0.28798	0.12486	0.26226	0.07626	0.071434	0.3696	0.071748	0.070992	0.88815	0.157	0.69002	0.30192	0.07099	0.87514	0.080428	0.10633	0.072657	0.093038	0.86389	0.080352	0.073066	0.17623	0.21758	0.34862	0.092185	0.37713	0.090778	0.86962	0.84838	0.11556	0.70639	0.41613	0.2288	0.093837
559	0.71989	0.80854	0.72178	0.075754	0.085598	0.070989	0.26558	0.67377	0.10506	0.72489	0.07685	0.31235	0.090403	0.098224	0.073454	0.30563	0.10555	0.27515	0.073072	0.070928	0.31686	0.070972	0.071129	0.86799	0.12919	0.63111	0.32249	0.071436	0.83598	0.082489	0.10898	0.071264	0.095381	0.88399	0.08241	0.074516	0.14408	0.22432	0.29683	0.094513	0.32408	0.09308	0.82758	0.79971	0.11851	0.64758	0.36171	0.23687	0.096195
560	0.66141	0.75443	0.80596	0.077557	0.087799	0.07154	0.27878	0.76453	0.10766	0.80834	0.073397	0.33482	0.092695	0.10066	0.074985	0.32662	0.092049	0.29002	0.071419	0.0712	0.2668	0.07105	0.071863	0.82745	0.10863	0.5725	0.34732	0.072392	0.78578	0.084616	0.11169	0.070897	0.097764	0.86712	0.084535	0.076194	0.11948	0.23161	0.24819	0.09688	0.27357	0.095421	0.77594	0.74483	0.12158	0.58884	0.30922	0.24577	0.098593
561	0.60273	0.69715	0.85887	0.07949	0.090042	0.072571	0.294	0.83507	0.11032	0.85992	0.071554	0.36209	0.095024	0.10315	0.076721	0.35194	0.082964	0.30737	0.070866	0.072031	0.22079	0.07174	0.073026	0.77673	0.094158	0.51458	0.37772	0.073714	0.73029	0.086794	0.11448	0.071269	0.10019	0.82857	0.086712	0.078036	0.10171	0.23956	0.20423	0.099286	0.22689	0.097799	0.71977	0.68724	0.12477	0.53071	0.25959	0.25564	0.10103
562	0.54446	0.63877	0.87095	0.081518	0.092321	0.073948	0.31178	0.86771	0.11305	0.8707	0.070865	0.39562	0.09739	0.10568	0.078604	0.38291	0.077091	0.3279	0.071104	0.073264	0.18049	0.072872	0.074496	0.7211	0.084358	0.4576	0.41538	0.0753	0.67254	0.089016	0.11735	0.072172	0.10266	0.77901	0.088932	0.079997	0.089428	0.24828	0.1666	0.10173	0.18569	0.10022	0.66176	0.62879	0.12809	0.47343	0.21428	0.26671	0.10352
563	0.48695	0.58033	0.85036	0.083617	0.094636	0.075572	0.33283	0.86224	0.11586	0.84925	0.071006	0.43724	0.099796	0.10827	0.080595	0.4212	0.073519	0.35252	0.071911	0.074784	0.14733	0.074321	0.076188	0.6634	0.077971	0.40175	0.46231	0.077074	0.61414	0.091275	0.12032	0.073455	0.10517	0.72406	0.09119	0.082045	0.081241	0.25791	0.13646	0.10423	0.15148	0.10268	0.60331	0.57039	0.13158	0.41723	0.17495	0.27921	0.10606
564	0.43042	0.52237	0.81066	0.08577	0.096987	0.077373	0.35805	0.83102	0.11876	0.80911	0.071742	0.48895	0.10224	0.11092	0.082664	0.46876	0.071593	0.38239	0.073125	0.076511	0.12184	0.075996	0.078039	0.60512	0.074034	0.34741	0.52047	0.078984	0.5559	0.093569	0.1234	0.075012	0.10774	0.66674	0.093482	0.084159	0.076015	0.26863	0.11384	0.10677	0.12494	0.10519	0.54515	0.51255	0.13524	0.3624	0.14294	0.2935	0.10865
565	0.37516	0.46519	0.76108	0.087966	0.099374	0.079302	0.38863	0.78591	0.12176	0.75929	0.072906	0.55221	0.10473	0.11364	0.084793	0.52734	0.070846	0.41901	0.074632	0.078386	0.10336	0.077834	0.080004	0.54701	0.071847	0.29525	0.59047	0.080993	0.49826	0.095897	0.1266	0.076765	0.11037	0.60865	0.095809	0.086323	0.072908	0.28067	0.097756	0.10938	0.10555	0.10775	0.48764	0.45553	0.13911	0.30952	0.11858	0.30999	0.1113
566	0.32168	0.40905	0.7065	0.090199	0.1018	0.081325	0.42604	0.73362	0.12486	0.7046	0.074377	0.62614	0.10728	0.11643	0.086968	0.59719	0.070945	0.46409	0.076349	0.080369	0.090552	0.079789	0.082053	0.4895	0.070913	0.24638	0.66902	0.083075	0.44148	0.09826	0.12993	0.078659	0.11306	0.55061	0.09817	0.088528	0.071316	0.2943	0.086768	0.11204	0.092047	0.11037	0.43105	0.3996	0.14323	0.25958	0.10107	0.32923	0.11402
567	0.27088	0.35433	0.64965	0.092466	0.10427	0.083416	0.47191	0.67782	0.12809	0.6477	0.076067	0.70445	0.10987	0.11931	0.089183	0.67441	0.071651	0.51916	0.078215	0.082431	0.081997	0.08183	0.084164	0.43287	0.070879	0.2024	0.74579	0.085212	0.38586	0.10066	0.13343	0.080654	0.11582	0.4931	0.10057	0.090768	0.07081	0.30988	0.079536	0.11477	0.08298	0.11305	0.3757	0.34518	0.14763	0.21405	0.089008	0.35195	0.11681
568	0.22413	0.30169	0.592	0.094765	0.10679	0.08556	0.52756	0.62055	0.13147	0.59005	0.077914	0.77395	0.11253	0.12229	0.091431	0.74846	0.072793	0.58451	0.080191	0.084551	0.076513	0.083935	0.086324	0.37745	0.071489	0.16496	0.80487	0.087393	0.33188	0.1031	0.1371	0.082725	0.11866	0.43641	0.10301	0.093041	0.071081	0.32787	0.074999	0.11758	0.077129	0.1158	0.32211	0.29299	0.15236	0.17463	0.080998	0.37904	0.11969
569	0.18314	0.25221	0.53436	0.097096	0.10935	0.087745	0.59288	0.56291	0.135	0.53242	0.079874	0.8191	0.11525	0.12537	0.09371	0.80384	0.074246	0.65708	0.082245	0.086717	0.073226	0.086089	0.088523	0.32376	0.072561	0.13514	0.83331	0.08961	0.28039	0.10558	0.14098	0.084851	0.1216	0.38088	0.10549	0.095345	0.07191	0.34883	0.072387	0.12047	0.073579	0.11863	0.27121	0.2442	0.1575	0.14265	0.075907	0.4116	0.12266
570	0.14935	0.20746	0.47719	0.099461	0.11198	0.089966	0.66417	0.5055	0.13872	0.47528	0.081917	0.83223	0.11806	0.12857	0.096021	0.82911	0.075923	0.72815	0.084359	0.088921	0.071507	0.088282	0.090756	0.27274	0.073965	0.1129	0.83005	0.091859	0.23268	0.10812	0.1451	0.087021	0.12463	0.32705	0.10802	0.097682	0.07314	0.37349	0.071151	0.12346	0.071674	0.12155	0.22439	0.20042	0.16311	0.11837	0.072902	0.45087	0.12574
571	0.12335	0.16912	0.42084	0.10186	0.11467	0.092217	0.73237	0.44873	0.14265	0.41896	0.084021	0.8171	0.12094	0.1319	0.098364	0.82381	0.07776	0.78431	0.086518	0.091157	0.07091	0.090508	0.093019	0.22574	0.075606	0.097157	0.80325	0.094139	0.19043	0.1107	0.1495	0.089228	0.12778	0.2758	0.1106	0.10005	0.074656	0.40269	0.0709	0.12656	0.070942	0.12457	0.18334	0.16332	0.16932	0.10097	0.071384	0.49799	0.12894
572	0.10449	0.13836	0.36572	0.1043	0.11743	0.094499	0.78445	0.39294	0.14682	0.36389	0.086171	0.7832	0.12392	0.13539	0.10074	0.7962	0.079711	0.814	0.088714	0.093423	0.071117	0.092765	0.095313	0.18449	0.077417	0.086454	0.76234	0.096448	0.1552	0.11334	0.15423	0.091466	0.13106	0.2285	0.11324	0.10246	0.076377	0.43739	0.071355	0.12978	0.071054	0.1277	0.14952	0.1339	0.17625	0.08902	0.070932	0.55331	0.13228
573	0.091429	0.11528	0.31248	0.10678	0.12026	0.09681	0.81011	0.33867	0.15129	0.31072	0.088359	0.73847	0.12701	0.13906	0.10315	0.7551	0.081744	0.81455	0.090941	0.095719	0.0719	0.095051	0.097636	0.15045	0.079348	0.079439	0.71357	0.098789	0.12775	0.11605	0.15936	0.093734	0.13448	0.18684	0.11595	0.1049	0.078245	0.47847	0.072316	0.13314	0.071768	0.13095	0.1235	0.11205	0.18411	0.081101	0.071242	0.61527	0.13576
574	0.082709	0.09888	0.26216	0.10931	0.12319	0.099152	0.80792	0.28674	0.1561	0.26053	0.09058	0.6877	0.13021	0.14292	0.10561	0.70642	0.08384	0.79203	0.093199	0.098044	0.073096	0.097367	0.099992	0.12421	0.081367	0.075064	0.66053	0.10116	0.10766	0.11883	0.16495	0.096031	0.13807	0.15234	0.11873	0.10739	0.080217	0.5264	0.073639	0.13665	0.072914	0.13435	0.10464	0.096643	0.19315	0.076084	0.0721	0.67872	0.13943
575	0.077119	0.087694	0.21628	0.11189	0.12622	0.10153	0.78394	0.23845	0.16131	0.21483	0.092829	0.63372	0.13355	0.14703	0.1081	0.65359	0.085981	0.75463	0.095484	0.1004	0.074587	0.099714	0.10238	0.10517	0.083451	0.072573	0.60533	0.10357	0.093652	0.1217	0.17112	0.098357	0.14185	0.12564	0.12159	0.10993	0.082265	0.58038	0.075221	0.14034	0.07437	0.13791	0.091592	0.0862	0.20374	0.073133	0.073348	0.73464	0.14329
576	0.073761	0.080337	0.17653	0.11453	0.12935	0.10394	0.74597	0.19544	0.167	0.17531	0.095106	0.57819	0.13704	0.1514	0.11065	0.59863	0.08816	0.70856	0.097798	0.10279	0.076288	0.10209	0.10481	0.091987	0.085582	0.071424	0.54922	0.10602	0.084244	0.12465	0.178	0.10072	0.14585	0.10622	0.12454	0.11252	0.08437	0.63741	0.076987	0.14424	0.076046	0.14165	0.082884	0.079377	0.21643	0.071657	0.074877	0.77287	0.14739
577	0.071994	0.07572	0.14424	0.11724	0.13261	0.10639	0.69981	0.15934	0.17329	0.14329	0.097411	0.52209	0.14071	0.15609	0.11325	0.54276	0.09037	0.65757	0.10014	0.10522	0.07814	0.10451	0.10728	0.083184	0.087752	0.071236	0.49296	0.10852	0.078164	0.12771	0.18577	0.10311	0.1501	0.092739	0.12759	0.11517	0.086518	0.69144	0.078885	0.14837	0.07788	0.14561	0.077304	0.075141	0.23201	0.071234	0.076604	0.78725	0.15175
578	0.071367	0.07306	0.11971	0.12002	0.13601	0.10888	0.64892	0.131	0.18031	0.11902	0.099746	0.46604	0.14457	0.16116	0.11591	0.48671	0.092607	0.60388	0.10252	0.10769	0.080099	0.10697	0.10979	0.077541	0.089954	0.071737	0.43705	0.11106	0.074462	0.13088	0.19468	0.10554	0.15464	0.083724	0.13075	0.11788	0.088701	0.73431	0.080877	0.15278	0.079826	0.14981	0.073958	0.072753	0.25175	0.071567	0.078475	0.7786	0.15643
579	0.07155	0.07179	0.10216	0.12287	0.13957	0.11143	0.59547	0.11015	0.18826	0.10167	0.10211	0.41056	0.14867	0.16668	0.11863	0.43102	0.094872	0.5489	0.10493	0.11021	0.082135	0.10947	0.11235	0.074143	0.092183	0.072729	0.38199	0.11365	0.072448	0.13417	0.20507	0.10801	0.15954	0.077924	0.13404	0.12067	0.090913	0.75894	0.082938	0.15751	0.081853	0.1543	0.072198	0.071677	0.27762	0.072439	0.080446	0.75214	0.16149
580	0.072316	0.071515	0.090125	0.12582	0.14332	0.11402	0.54074	0.095569	0.19738	0.089797	0.10451	0.35619	0.15303	0.17274	0.12143	0.37621	0.097163	0.49346	0.10739	0.11277	0.084229	0.11202	0.11497	0.072351	0.094439	0.074073	0.32845	0.11631	0.071642	0.13762	0.21744	0.11052	0.16484	0.074421	0.13748	0.12354	0.093152	0.76265	0.085051	0.16262	0.08394	0.15912	0.071573	0.071541	0.31298	0.073698	0.082492	0.71403	0.16699
581	0.073497	0.071951	0.082155	0.12886	0.14727	0.11668	0.48557	0.085748	0.20803	0.081943	0.10695	0.30374	0.1577	0.17948	0.12431	0.32296	0.099482	0.43817	0.10988	0.1154	0.086366	0.11462	0.11765	0.0717	0.096721	0.075667	0.27739	0.11902	0.071698	0.14122	0.23252	0.11309	0.17065	0.072548	0.14108	0.12649	0.095417	0.74749	0.087202	0.16819	0.086071	0.16433	0.071759	0.072077	0.36339	0.07523	0.084591	0.66883	0.17303
582	0.074975	0.072898	0.077101	0.13201	0.15146	0.1194	0.43055	0.079369	0.22074	0.076972	0.10943	0.25439	0.16274	0.18704	0.12728	0.27233	0.10183	0.38356	0.11243	0.11808	0.088537	0.11728	0.1204	0.071869	0.09903	0.07744	0.23025	0.12181	0.072372	0.14502	0.25142	0.11571	0.17706	0.071843	0.14486	0.12955	0.097708	0.71834	0.089386	0.17431	0.088237	0.17003	0.072526	0.073094	0.4385	0.07696	0.086732	0.61934	0.17973
583	0.076666	0.074209	0.074131	0.13529	0.15594	0.12219	0.37624	0.075455	0.23627	0.07406	0.11196	0.20976	0.16822	0.19566	0.13036	0.22576	0.10421	0.33033	0.11502	0.12083	0.090737	0.12001	0.12323	0.072625	0.10137	0.079341	0.18874	0.12469	0.073489	0.14903	0.27592	0.1184	0.18421	0.071974	0.14886	0.13272	0.10003	0.67982	0.091596	0.18111	0.090433	0.1763	0.073709	0.074456	0.55328	0.078829	0.088906	0.56733	0.18725
584	0.078506	0.075779	0.072648	0.13871	0.16074	0.12506	0.32341	0.0733	0.2558	0.072619	0.11454	0.17153	0.17422	0.20564	0.13355	0.18499	0.10663	0.27949	0.11768	0.12366	0.092962	0.12281	0.12614	0.0738	0.10374	0.081332	0.15436	0.12765	0.074921	0.15328	0.30889	0.12115	0.1923	0.072703	0.15311	0.13602	0.10237	0.63517	0.093833	0.18874	0.092655	0.18328	0.075189	0.076062	0.72161	0.080798	0.091108	0.514	0.19581
585	0.080455	0.077535	0.072224	0.14229	0.16592	0.12802	0.27311	0.072397	0.28116	0.072225	0.11717	0.14087	0.18087	0.21741	0.13686	0.15146	0.10909	0.23247	0.1204	0.12657	0.095213	0.12569	0.12914	0.075273	0.10614	0.08339	0.12774	0.13071	0.076578	0.15783	0.35515	0.12398	0.20159	0.073858	0.15764	0.13946	0.10476	0.58673	0.096093	0.19745	0.094902	0.19115	0.076879	0.077843	0.91719	0.082839	0.093336	0.46016	0.2057
586	0.08248	0.079421	0.072555	0.14605	0.17157	0.13108	0.22682	0.072387	0.31537	0.072578	0.11987	0.11783	0.18831	0.23161	0.14032	0.12566	0.11159	0.19095	0.12319	0.12958	0.097488	0.12867	0.13225	0.076958	0.10858	0.085497	0.10834	0.13388	0.078394	0.16272	0.42286	0.12689	0.21243	0.075317	0.16251	0.14306	0.10717	0.53601	0.098379	0.20752	0.097173	0.20015	0.078719	0.079748	1.0406	0.084933	0.095588	0.40646	0.21735
587	0.084562	0.081402	0.073426	0.15002	0.17778	0.13426	0.18624	0.073013	0.36346	0.073464	0.12264	0.10144	0.19676	0.24916	0.14395	0.10696	0.11413	0.15646	0.12607	0.13269	0.099789	0.13174	0.13547	0.078795	0.11107	0.087641	0.094843	0.13718	0.080323	0.168	0.52489	0.12989	0.22534	0.076992	0.16778	0.14684	0.10963	0.48407	0.10069	0.2194	0.09947	0.2106	0.080666	0.081742	1.0495	0.087068	0.097864	0.35358	0.23136
588	0.086686	0.08345	0.074682	0.15422	0.18467	0.13756	0.15281	0.074095	0.43382	0.074731	0.12548	0.090248	0.20649	0.27154	0.14776	0.094006	0.11673	0.12966	0.12903	0.13591	0.10212	0.13493	0.13883	0.080738	0.1136	0.089816	0.085815	0.14062	0.082334	0.17376	0.67561	0.133	0.24109	0.07882	0.17352	0.15083	0.11213	0.43166	0.10303	0.23373	0.10179	0.22298	0.08269	0.083799	1.0074	0.089234	0.10017	0.30243	0.24864
589	0.088844	0.085548	0.076212	0.1587	0.19241	0.141	0.12704	0.075501	0.53944	0.076268	0.12841	0.0829	0.2179	0.30106	0.15178	0.085374	0.11939	0.11005	0.13209	0.13927	0.10448	0.13824	0.14233	0.082759	0.11618	0.092016	0.080023	0.14422	0.084405	0.1801	0.86341	0.13623	0.26082	0.080758	0.17983	0.15507	0.11467	0.3795	0.10541	0.25144	0.10415	0.23797	0.084769	0.085904	0.94965	0.091427	0.1025	0.25426	0.27059
590	0.091029	0.087684	0.077936	0.1635	0.20122	0.14459	0.10832	0.077137	0.693	0.077998	0.13143	0.078308	0.23155	0.34152	0.15605	0.079866	0.12212	0.096386	0.13526	0.14278	0.10687	0.1417	0.146	0.084836	0.11881	0.09424	0.076537	0.148	0.086519	0.18715	1.0087	0.13959	0.28635	0.082774	0.18685	0.15958	0.11727	0.3284	0.10781	0.27399	0.10654	0.25661	0.086891	0.088046	0.88816	0.093644	0.10486	0.21066	0.29943
591	0.093238	0.08985	0.079799	0.16868	0.2114	0.14837	0.095332	0.078937	0.8776	0.079864	0.13456	0.075676	0.24828	0.3992	0.1606	0.076582	0.12491	0.087227	0.13855	0.14646	0.1093	0.14531	0.14987	0.086956	0.12151	0.096488	0.07469	0.15198	0.088668	0.19508	1.0436	0.14309	0.32058	0.084847	0.19473	0.16442	0.11993	0.27943	0.11026	0.30369	0.10896	0.2805	0.089045	0.090217	0.82691	0.095884	0.10725	0.1733	0.33877
592	0.09547	0.092042	0.08176	0.1743	0.22338	0.15235	0.086672	0.080853	1.0112	0.081828	0.13781	0.074436	0.26937	0.48422	0.16548	0.07488	0.12779	0.081342	0.14198	0.15032	0.11177	0.14911	0.15395	0.089108	0.12428	0.098759	0.074009	0.15621	0.090844	0.20413	1.0109	0.14676	0.36829	0.086963	0.20372	0.16964	0.12265	0.23403	0.11275	0.34431	0.11142	0.31218	0.091227	0.092413	0.76722	0.098148	0.10968	0.14327	0.39456
593	0.097726	0.094258	0.083791	0.18047	0.23778	0.15657	0.081145	0.082852	1.0376	0.083862	0.14119	0.074186	0.29681	0.60981	0.17076	0.074301	0.13075	0.077793	0.14557	0.1544	0.11428	0.15312	0.15828	0.091287	0.12712	0.10105	0.074157	0.16071	0.093045	0.2146	0.95704	0.15062	0.43729	0.089112	0.21413	0.17531	0.12544	0.19384	0.11528	0.40204	0.11393	0.35582	0.093433	0.094633	0.70958	0.10044	0.11215	0.12064	0.47639
594	0.1	0.096496	0.085875	0.18729	0.25551	0.16106	0.077851	0.084911	1.0021	0.085947	0.14471	0.074643	0.33383	0.77881	0.17649	0.074523	0.13381	0.075903	0.14934	0.15874	0.11684	0.15736	0.1629	0.09349	0.13005	0.10338	0.074897	0.16552	0.095269	0.22696	0.89638	0.1547	0.5393	0.091288	0.22639	0.18154	0.12831	0.16031	0.11786	0.4867	0.11648	0.41823	0.095661	0.096875	0.65416	0.10275	0.11466	0.10449	0.59708
595	0.10231	0.098757	0.087998	0.19491	0.27798	0.16587	0.076143	0.087015	0.94756	0.088071	0.14841	0.075601	0.38565	0.94511	0.18279	0.075315	0.13698	0.075192	0.15331	0.16336	0.11946	0.16188	0.16786	0.095716	0.13307	0.10573	0.076057	0.17071	0.097516	0.24185	0.83492	0.15902	0.68529	0.093489	0.24115	0.18843	0.13126	0.13409	0.1205	0.61089	0.11909	0.50992	0.097912	0.09914	0.6009	0.10509	0.11723	0.09345	0.76132
596	0.10464	0.10104	0.090151	0.20355	0.30737	0.17105	0.075561	0.089154	0.88684	0.090225	0.15229	0.076916	0.46066	1.0257	0.18976	0.076512	0.14027	0.075319	0.1575	0.16832	0.12213	0.16672	0.17323	0.097965	0.13619	0.10811	0.077516	0.17635	0.099785	0.26025	0.77453	0.16363	0.86037	0.095712	0.25936	0.19614	0.13431	0.11478	0.1232	0.7769	0.12175	0.64291	0.10019	0.10143	0.54962	0.10747	0.11984	0.0862	0.92967
597	0.107	0.10335	0.092331	0.21348	0.34719	0.17667	0.07578	0.091321	0.82539	0.092406	0.1564	0.078486	0.57055	1.0162	0.19757	0.077996	0.14369	0.076043	0.16197	0.17368	0.12487	0.17194	0.17906	0.10024	0.13943	0.11053	0.079187	0.18252	0.10208	0.28362	0.71594	0.16858	0.99257	0.097957	0.28247	0.20488	0.13747	0.10124	0.12597	0.93978	0.12448	0.81275	0.10249	0.10375	0.50008	0.10988	0.12252	0.081681	1.0199
598	0.1094	0.10569	0.094534	0.22507	0.4031	0.18282	0.076569	0.093512	0.76504	0.094609	0.16075	0.080235	0.72271	0.97051	0.20643	0.079686	0.14727	0.077191	0.16674	0.17951	0.12768	0.1776	0.18547	0.10253	0.1428	0.11299	0.081009	0.18933	0.1044	0.31427	0.6594	0.17392	1.0252	0.10022	0.31273	0.21493	0.14075	0.092137	0.12882	1.0201	0.12728	0.96292	0.10481	0.10609	0.45196	0.11232	0.12526	0.079104	1.0169
599	0.11183	0.10806	0.096759	0.23888	0.48394	0.1896	0.077763	0.095725	0.70646	0.096835	0.16539	0.082112	0.8908	0.91284	0.21663	0.08152	0.15102	0.078641	0.17187	0.18591	0.13057	0.18379	0.19258	0.10486	0.14631	0.11549	0.082938	0.19693	0.10675	0.35591	0.60491	0.17973	0.99385	0.10252	0.35377	0.22669	0.14416	0.086281	0.13174	1.0118	0.13016	1.0217	0.10717	0.10846	0.405	0.11481	0.12807	0.077907	0.97327
600	0.1143	0.11047	0.099005	0.2557	0.60081	0.19716	0.079245	0.09796	0.64989	0.099082	0.17037	0.084081	0.99997	0.85162	0.22858	0.083457	0.15496	0.080304	0.17742	0.19301	0.13355	0.19063	0.20055	0.10721	0.14999	0.11804	0.084944	0.20552	0.10913	0.41445	0.55236	0.1861	0.94142	0.10484	0.41138	0.24071	0.14772	0.082754	0.13476	0.96676	0.13312	1.0023	0.10956	0.11087	0.35903	0.11734	0.13096	0.07769	0.91645
601	0.11682	0.11291	0.10128	0.27672	0.75643	0.20569	0.080931	0.10022	0.59531	0.10135	0.17574	0.086115	1.0145	0.79055	0.24283	0.08547	0.15913	0.082119	0.18349	0.20095	0.13662	0.19826	0.2096	0.10959	0.15385	0.12064	0.087007	0.21536	0.11155	0.49887	0.5015	0.19315	0.88151	0.10718	0.49439	0.2578	0.15145	0.080883	0.13788	0.90946	0.13618	0.95397	0.11198	0.11332	0.3141	0.11992	0.13394	0.078168	0.85542
602	0.11938	0.11539	0.10357	0.30376	0.91411	0.21546	0.082761	0.1025	0.54259	0.10365	0.18157	0.088198	0.97751	0.73078	0.26024	0.087536	0.16355	0.084042	0.19016	0.20997	0.13981	0.20687	0.22002	0.11201	0.15792	0.1233	0.089111	0.22682	0.114	0.61965	0.45207	0.20104	0.82016	0.10956	0.61335	0.27919	0.15537	0.080188	0.14112	0.84837	0.13934	0.89546	0.11444	0.11581	0.27064	0.12256	0.13702	0.07914	0.79425
603	0.122	0.11791	0.10589	0.33968	1.0016	0.2268	0.084695	0.10481	0.49151	0.10597	0.18797	0.090319	0.92333	0.67279	0.28206	0.089644	0.16827	0.086042	0.19758	0.22034	0.14311	0.21673	0.23223	0.11447	0.16223	0.12602	0.091249	0.2404	0.1165	0.77593	0.40383	0.20998	0.75956	0.11198	0.76849	0.30674	0.15951	0.080326	0.14447	0.78728	0.14263	0.83425	0.11695	0.11835	0.2295	0.12526	0.1402	0.080462	0.73427
604	0.12467	0.12049	0.10824	0.38899	1.0026	0.24023	0.086704	0.10714	0.4418	0.10832	0.19505	0.092469	0.86307	0.61672	0.31018	0.091783	0.17333	0.0881	0.20592	0.23248	0.14654	0.22819	0.24682	0.11697	0.16681	0.12881	0.093413	0.25684	0.11904	0.92558	0.35665	0.22025	0.70047	0.11443	0.91997	0.34337	0.16389	0.081056	0.14797	0.72738	0.14604	0.77332	0.1195	0.12093	0.192	0.12803	0.1435	0.082033	0.676
605	0.12741	0.12312	0.11062	0.45868	0.96158	0.25645	0.088768	0.1095	0.39325	0.1107	0.20296	0.094645	0.80184	0.56249	0.34763	0.09395	0.17879	0.090201	0.21541	0.24696	0.15013	0.24177	0.26464	0.11952	0.17171	0.13167	0.095602	0.27725	0.12164	1.0004	0.31066	0.23225	0.64321	0.11692	0.99897	0.39369	0.16856	0.082206	0.15163	0.6692	0.1496	0.71371	0.12211	0.12357	0.15956	0.13086	0.14694	0.083781	0.61961
606	0.13022	0.12581	0.11304	0.55809	0.90611	0.27652	0.090872	0.1119	0.34581	0.11312	0.21191	0.096844	0.74142	0.50995	0.39909	0.09614	0.18473	0.092335	0.22639	0.26461	0.15389	0.25818	0.28696	0.12211	0.17699	0.13461	0.097812	0.30328	0.12429	0.99443	0.26635	0.24652	0.58781	0.11946	0.9957	0.46474	0.17357	0.083654	0.15547	0.61287	0.15333	0.65584	0.12477	0.12627	0.13319	0.13378	0.15053	0.085655	0.56506
607	0.13311	0.12856	0.11549	0.69341	0.84567	0.30204	0.09301	0.11434	0.29969	0.11558	0.22217	0.099065	0.68251	0.45886	0.4717	0.098353	0.19124	0.094497	0.2393	0.28666	0.15783	0.27849	0.31573	0.12477	0.1827	0.13765	0.10004	0.3375	0.127	0.95146	0.2247	0.26388	0.53416	0.12205	0.9537	0.56578	0.17896	0.085313	0.15951	0.55835	0.15724	0.5998	0.12749	0.12903	0.11303	0.13679	0.15428	0.08762	0.51218
608	0.13608	0.13138	0.11799	0.84711	0.78457	0.33544	0.095175	0.11681	0.25553	0.11807	0.23414	0.10131	0.62537	0.40901	0.57451	0.10059	0.19844	0.096683	0.25479	0.31501	0.16199	0.30433	0.35396	0.12748	0.18894	0.14079	0.1023	0.38391	0.12977	0.89536	0.18711	0.2855	0.48206	0.1247	0.89797	0.70209	0.18481	0.087123	0.16377	0.50546	0.16137	0.54552	0.13029	0.13187	0.098398	0.1399	0.15822	0.08965	0.46075
609	0.13914	0.13429	0.12053	0.96098	0.72432	0.38055	0.097364	0.11933	0.21445	0.12062	0.24833	0.10357	0.57	0.36032	0.71171	0.10284	0.20649	0.098892	0.27377	0.35257	0.1664	0.33816	0.40635	0.13026	0.1958	0.14404	0.10458	0.44862	0.13263	0.83488	0.15501	0.31319	0.43128	0.1274	0.83757	0.85392	0.19121	0.089042	0.1683	0.454	0.16574	0.49281	0.13315	0.13479	0.088217	0.14311	0.16238	0.09173	0.41059
610	0.14231	0.13727	0.12312	0.99237	0.66556	0.44316	0.099576	0.12189	0.17793	0.12321	0.26554	0.10586	0.51627	0.31293	0.86102	0.10513	0.2156	0.10112	0.29764	0.40383	0.1711	0.38384	0.47982	0.13312	0.20343	0.14742	0.10688	0.53992	0.13556	0.77386	0.12928	0.3497	0.3817	0.13017	0.77654	0.96263	0.19827	0.091039	0.17314	0.40378	0.17038	0.44148	0.1361	0.13779	0.08142	0.14644	0.16678	0.093849	0.36159
611	0.1456	0.14036	0.12577	0.96577	0.60849	0.53127	0.10181	0.12451	0.1473	0.12586	0.28687	0.10818	0.464	0.26741	0.96379	0.10743	0.22604	0.10338	0.32852	0.47547	0.17612	0.4472	0.58282	0.13606	0.21201	0.15093	0.10921	0.66449	0.13858	0.71371	0.10986	0.39932	0.33335	0.13301	0.71634	0.9896	0.20614	0.093095	0.17832	0.35475	0.17535	0.39136	0.13914	0.14089	0.077117	0.14991	0.17147	0.095999	0.31393
612	0.14901	0.14355	0.12848	0.91617	0.55311	0.65172	0.10407	0.12718	0.12321	0.12857	0.31405	0.11053	0.41301	0.22477	0.98626	0.10977	0.2382	0.10566	0.36964	0.57569	0.18152	0.5361	0.71795	0.13908	0.22176	0.15461	0.11158	0.81134	0.1417	0.65503	0.095927	0.46838	0.28661	0.13593	0.65758	0.9614	0.21501	0.095197	0.18392	0.30712	0.18069	0.34247	0.14228	0.1441	0.074631	0.15353	0.17648	0.098176	0.26814
613	0.15256	0.14685	0.13125	0.85796	0.49927	0.7962	0.10635	0.12992	0.10534	0.13134	0.34966	0.1129	0.36323	0.18647	0.95638	0.11213	0.25261	0.10796	0.42594	0.70771	0.18738	0.65694	0.86166	0.14221	0.23303	0.15845	0.11397	0.93285	0.14492	0.59799	0.086329	0.56484	0.24232	0.13894	0.60046	0.91132	0.22513	0.097334	0.19001	0.26152	0.18647	0.29513	0.14553	0.14743	0.073464	0.15732	0.18187	0.10038	0.22527
614	0.15627	0.15029	0.13409	0.79726	0.44682	0.92113	0.10866	0.13272	0.092679	0.13419	0.39766	0.11531	0.31484	0.15396	0.90581	0.11453	0.27004	0.11029	0.50437	0.85062	0.19378	0.80033	0.95809	0.14544	0.24625	0.16249	0.1164	0.98025	0.14827	0.54257	0.079986	0.69281	0.2018	0.14205	0.54497	0.85301	0.23686	0.099502	0.19668	0.21908	0.19277	0.25009	0.14891	0.15089	0.073253	0.16129	0.18771	0.1026	0.18678
615	0.16016	0.15386	0.13701	0.73658	0.39563	0.97587	0.11099	0.1356	0.084066	0.13711	0.46387	0.11776	0.26844	0.12808	0.84738	0.11696	0.29162	0.11265	0.61215	0.95086	0.20082	0.92211	0.97792	0.14879	0.26206	0.16676	0.11887	0.96401	0.15175	0.48866	0.076026	0.83493	0.16657	0.14526	0.49099	0.79233	0.25068	0.1017	0.20405	0.18129	0.19969	0.2086	0.15242	0.15449	0.073736	0.16548	0.19408	0.10485	0.15411
616	0.16426	0.1576	0.14002	0.67692	0.34572	0.96452	0.11336	0.13856	0.078456	0.14013	0.55563	0.12025	0.22508	0.10869	0.78674	0.11944	0.31899	0.11505	0.74744	0.97559	0.20864	0.97371	0.94797	0.15228	0.28136	0.17128	0.12138	0.91898	0.15538	0.43609	0.073796	0.94082	0.13781	0.14859	0.43836	0.7317	0.26728	0.10392	0.21229	0.14956	0.20738	0.17221	0.15608	0.15826	0.074721	0.16992	0.20108	0.10712	0.12813
617	0.16858	0.16152	0.14312	0.61868	0.29744	0.9216	0.11576	0.14161	0.075033	0.14323	0.67715	0.12278	0.18625	0.094856	0.72616	0.12195	0.35468	0.11748	0.87979	0.94842	0.21743	0.96112	0.89771	0.15591	0.3055	0.1761	0.12394	0.86276	0.15917	0.38478	0.072817	0.9731	0.11577	0.15205	0.38698	0.67208	0.28764	0.10616	0.22159	0.12459	0.21599	0.14219	0.15991	0.16221	0.076072	0.17463	0.20886	0.10942	0.10867
618	0.17316	0.16564	0.14633	0.56198	0.25157	0.86631	0.1182	0.14477	0.073193	0.14644	0.81466	0.12537	0.15341	0.085382	0.66659	0.12452	0.40245	0.11994	0.95724	0.89939	0.22742	0.9179	0.83961	0.15971	0.33646	0.18125	0.12655	0.80273	0.16315	0.33483	0.072744	0.95013	0.099773	0.15565	0.33696	0.61387	0.31325	0.10844	0.23223	0.10606	0.22577	0.11898	0.16394	0.16637	0.077688	0.17966	0.21758	0.11175	0.094798
619	0.17804	0.17	0.14966	0.50676	0.2094	0.8066	0.12067	0.14802	0.072497	0.14977	0.9234	0.128	0.1274	0.079154	0.60841	0.12713	0.46774	0.12245	0.96429	0.84183	0.23895	0.86258	0.77917	0.1637	0.37726	0.1868	0.12921	0.74207	0.16735	0.28669	0.073326	0.90294	0.088651	0.15942	0.28872	0.55717	0.34627	0.11074	0.2446	0.092952	0.23701	0.102	0.16818	0.17077	0.079499	0.18507	0.22749	0.11411	0.085302
620	0.18327	0.17461	0.15311	0.4529	0.17249	0.74598	0.12319	0.1514	0.072629	0.15323	0.96384	0.13069	0.10799	0.07529	0.55172	0.1298	0.55713	0.12501	0.92992	0.78155	0.25245	0.80291	0.71867	0.1679	0.43232	0.19281	0.13194	0.68208	0.17178	0.24128	0.074383	0.84612	0.081215	0.16336	0.24317	0.50194	0.38999	0.11306	0.2592	0.084038	0.25014	0.090127	0.17267	0.17544	0.081454	0.19092	0.23889	0.1165	0.079063
621	0.1889	0.17953	0.1567	0.40033	0.14212	0.6859	0.12575	0.15492	0.07336	0.15682	0.94673	0.13344	0.094208	0.073135	0.49646	0.13253	0.67391	0.12762	0.8784	0.72105	0.26854	0.74234	0.65908	0.17233	0.50758	0.19937	0.13472	0.62331	0.17649	0.20001	0.075784	0.7861	0.076478	0.16751	0.20168	0.44805	0.44915	0.11542	0.27677	0.078226	0.26575	0.082141	0.17744	0.18042	0.083517	0.19728	0.25223	0.11892	0.075192
622	0.195	0.1848	0.16045	0.34912	0.11871	0.62695	0.12837	0.15858	0.074525	0.16058	0.9025	0.13626	0.084799	0.072213	0.44253	0.13532	0.80501	0.13028	0.82016	0.66136	0.28813	0.68228	0.60079	0.17705	0.60879	0.20659	0.13759	0.56595	0.18151	0.16442	0.077435	0.7256	0.073695	0.1719	0.16582	0.39544	0.52982	0.11781	0.29837	0.074667	0.28468	0.077007	0.18254	0.18575	0.085664	0.20426	0.26808	0.12139	0.073034
623	0.20167	0.19047	0.16438	0.29965	0.10164	0.56938	0.13104	0.16241	0.076003	0.16452	0.84719	0.13916	0.078635	0.072183	0.38989	0.13819	0.90997	0.133	0.75989	0.60292	0.31249	0.62335	0.54391	0.18207	0.73348	0.2146	0.14052	0.51	0.18689	0.13566	0.079268	0.66579	0.072321	0.17654	0.13675	0.34423	0.63665	0.12024	0.32555	0.072734	0.30812	0.07394	0.18801	0.19151	0.087878	0.21198	0.28733	0.12389	0.07211
624	0.209	0.19662	0.16851	0.25276	0.089741	0.51319	0.13376	0.16642	0.077709	0.16865	0.78778	0.14213	0.074825	0.072797	0.33869	0.14113	0.95191	0.13578	0.69961	0.54585	0.34354	0.56576	0.4884	0.18746	0.85617	0.22359	0.14355	0.45539	0.1927	0.11383	0.081236	0.60716	0.071964	0.18149	0.11463	0.29485	0.76298	0.1227	0.36058	0.071974	0.33787	0.072361	0.19393	0.19775	0.090149	0.22061	0.31118	0.12644	0.072079
625	0.21716	0.20334	0.17286	0.20978	0.081757	0.45834	0.13656	0.17065	0.079581	0.17301	0.72745	0.1452	0.072713	0.073875	0.2894	0.14416	0.93767	0.13863	0.64019	0.49015	0.38405	0.50955	0.4342	0.19327	0.9332	0.2338	0.14666	0.40207	0.19902	0.098137	0.083304	0.54987	0.072342	0.18679	0.098699	0.24817	0.87756	0.1252	0.40681	0.072061	0.37652	0.071857	0.20036	0.20458	0.092472	0.23036	0.34146	0.12904	0.072691
626	0.22631	0.21073	0.17747	0.17229	0.076636	0.40478	0.13942	0.17511	0.081576	0.17763	0.66754	0.14836	0.071824	0.07529	0.243	0.14728	0.89541	0.14156	0.58198	0.43575	0.43802	0.45465	0.38132	0.19958	0.94628	0.24554	0.14988	0.35016	0.20592	0.087308	0.085449	0.49393	0.07325	0.19249	0.087688	0.20559	0.939	0.12775	0.46887	0.072758	0.42786	0.072129	0.20741	0.21211	0.094843	0.24152	0.38081	0.13169	0.073769
627	0.23671	0.21895	0.18237	0.1416	0.073582	0.35262	0.14236	0.17984	0.083663	0.18254	0.60866	0.15163	0.071819	0.076949	0.20091	0.1505	0.84142	0.14457	0.5251	0.38266	0.51062	0.40104	0.32996	0.20648	0.91684	0.25925	0.15321	0.30006	0.21354	0.08012	0.087657	0.43929	0.074542	0.19867	0.080366	0.16871	0.93977	0.13035	0.5521	0.073898	0.49686	0.072961	0.21521	0.22048	0.097261	0.25448	0.43302	0.13439	0.075183
628	0.24867	0.22816	0.1876	0.11805	0.072017	0.30227	0.14538	0.18488	0.085821	0.18779	0.55102	0.15501	0.07245	0.078783	0.16473	0.15384	0.7827	0.14768	0.46951	0.3311	0.60639	0.34886	0.28072	0.21408	0.86847	0.27552	0.15666	0.25265	0.22202	0.07558	0.089918	0.38596	0.07611	0.20541	0.075728	0.13873	0.90474	0.13299	0.65897	0.075356	0.58845	0.074196	0.22391	0.2299	0.099729	0.26976	0.50302	0.13716	0.076841
629	0.26264	0.23862	0.19323	0.10098	0.071524	0.25458	0.1485	0.19028	0.088038	0.19342	0.49467	0.15852	0.073541	0.080748	0.13557	0.1573	0.72267	0.15088	0.41521	0.28167	0.72253	0.29855	0.23468	0.22255	0.81204	0.2952	0.16026	0.20929	0.23156	0.072946	0.092226	0.33415	0.077878	0.21282	0.073025	0.1159	0.8541	0.1357	0.77903	0.077044	0.70184	0.075724	0.23373	0.24062	0.10225	0.28812	0.5954	0.14	0.078674
630	0.27924	0.25065	0.1993	0.089129	0.071804	0.21092	0.15171	0.19609	0.090303	0.19952	0.43959	0.16218	0.074963	0.082809	0.11355	0.1609	0.66282	0.15419	0.36229	0.23545	0.83696	0.25103	0.19336	0.23206	0.75264	0.3195	0.164	0.1716	0.24242	0.071684	0.094577	0.28444	0.079793	0.22104	0.071713	0.099441	0.79682	0.13846	0.88	0.0789	0.8189	0.077462	0.24494	0.25297	0.10483	0.3106	0.70849	0.1429	0.080636
631	0.29931	0.26469	0.20591	0.081206	0.072641	0.17291	0.15504	0.20238	0.092614	0.20614	0.38582	0.16599	0.076625	0.084943	0.097763	0.16465	0.60382	0.15762	0.31113	0.19394	0.91206	0.20767	0.15832	0.24289	0.69266	0.35014	0.16791	0.14086	0.25496	0.07141	0.096973	0.23789	0.081815	0.23025	0.071403	0.088065	0.73724	0.14129	0.92803	0.080879	0.9029	0.079354	0.25793	0.26743	0.10747	0.33872	0.82306	0.14589	0.082695
632	0.32408	0.28133	0.21315	0.076143	0.07388	0.14184	0.15848	0.20925	0.094967	0.21341	0.33362	0.16998	0.07846	0.087136	0.086912	0.16856	0.54594	0.16118	0.26252	0.15874	0.92935	0.17012	0.13051	0.25536	0.63317	0.38962	0.17201	0.11737	0.26964	0.071847	0.099415	0.196	0.083918	0.24068	0.071815	0.080495	0.67735	0.14419	0.92237	0.082948	0.92965	0.081358	0.27319	0.28463	0.11018	0.37465	0.90297	0.14896	0.084827
633	0.35529	0.30143	0.22116	0.073138	0.075408	0.11806	0.16206	0.2168	0.097362	0.22144	0.28358	0.17417	0.080422	0.089378	0.079728	0.17267	0.48927	0.16489	0.21778	0.13079	0.9045	0.13961	0.10977	0.26994	0.57463	0.44137	0.17632	0.1004	0.28711	0.072798	0.1019	0.16038	0.086085	0.25264	0.072747	0.075688	0.61806	0.14717	0.88568	0.085088	0.9103	0.083447	0.29144	0.30547	0.11296	0.42146	0.9264	0.15213	0.087016
634	0.39541	0.32617	0.23008	0.071612	0.077146	0.10087	0.16578	0.22516	0.099802	0.23039	0.23681	0.17857	0.082477	0.091663	0.075202	0.17699	0.43384	0.16876	0.17852	0.10996	0.85909	0.11639	0.095076	0.28728	0.51723	0.50962	0.18087	0.088654	0.30831	0.074119	0.10445	0.13201	0.088303	0.26655	0.074054	0.072869	0.55976	0.15023	0.83492	0.087283	0.86739	0.085601	0.31367	0.33122	0.11583	0.48312	0.90556	0.15539	0.089254
635	0.44782	0.35726	0.24013	0.071149	0.079034	0.088954	0.16966	0.23453	0.10229	0.24049	0.19485	0.18323	0.084604	0.093988	0.072585	0.18154	0.37973	0.1728	0.14615	0.095183	0.80448	0.099668	0.085059	0.30826	0.46102	0.59786	0.18569	0.080824	0.33451	0.075706	0.10704	0.11082	0.090565	0.28299	0.075631	0.071476	0.50259	0.15338	0.778	0.089525	0.81392	0.087807	0.3413	0.36369	0.1188	0.56367	0.8622	0.15877	0.091534
636	0.51652	0.39706	0.25159	0.071451	0.081033	0.081004	0.17373	0.24513	0.10483	0.252	0.15928	0.18818	0.086786	0.096353	0.071338	0.18636	0.32728	0.17705	0.12118	0.085115	0.74611	0.088128	0.078492	0.33413	0.40608	0.70351	0.19082	0.075837	0.36755	0.077484	0.10971	0.095763	0.092867	0.30274	0.077403	0.071109	0.44662	0.15662	0.71884	0.091808	0.75597	0.090057	0.37632	0.4054	0.12188	0.66362	0.80863	0.16227	0.093854
637	0.60444	0.44881	0.26483	0.072304	0.083114	0.075933	0.178	0.25728	0.10742	0.2653	0.13107	0.19344	0.089014	0.098758	0.071076	0.19149	0.27718	0.18153	0.10301	0.078514	0.68663	0.080455	0.074414	0.36667	0.35259	0.80909	0.1963	0.072891	0.40998	0.079402	0.11244	0.085489	0.095208	0.32693	0.079315	0.071481	0.39194	0.15998	0.6593	0.09413	0.69658	0.092347	0.42148	0.45973	0.12508	0.7718	0.75073	0.16591	0.096212
638	0.70813	0.51626	0.28033	0.073553	0.085259	0.072928	0.18249	0.27137	0.11008	0.28089	0.11007	0.19908	0.091283	0.10121	0.071523	0.19697	0.23064	0.18626	0.090367	0.074413	0.62728	0.075583	0.07212	0.40833	0.30108	0.88374	0.20219	0.071409	0.46516	0.081421	0.11525	0.078742	0.097587	0.35709	0.08133	0.072383	0.33882	0.16345	0.60022	0.09649	0.63716	0.094676	0.4803	0.53044	0.12842	0.86075	0.69142	0.1697	0.098611
639	0.80973	0.60207	0.29878	0.075086	0.087453	0.071403	0.18724	0.28798	0.1128	0.29945	0.095199	0.20516	0.09359	0.1037	0.07248	0.20286	0.18924	0.19127	0.081893	0.072103	0.56864	0.072722	0.071106	0.46232	0.25252	0.90801	0.20856	0.070978	0.5367	0.083516	0.11815	0.074536	0.10001	0.39542	0.083423	0.073668	0.28789	0.16706	0.54202	0.098889	0.57838	0.097042	0.5563	0.61958	0.13192	0.90367	0.63209	0.17365	0.10105
640	0.87996	0.70285	0.32112	0.076825	0.089689	0.070943	0.19227	0.30787	0.11561	0.32194	0.085081	0.21173	0.095933	0.10625	0.073804	0.20921	0.15455	0.19662	0.076449	0.071078	0.51097	0.071302	0.071012	0.53215	0.20834	0.89032	0.21548	0.071304	0.62622	0.08567	0.12115	0.072153	0.10247	0.4448	0.085574	0.075227	0.24027	0.1708	0.48486	0.10133	0.52053	0.099448	0.64993	0.72183	0.1356	0.89919	0.57337	0.17778	0.10354
641	0.9015	0.80194	0.34865	0.078711	0.091963	0.071247	0.19764	0.33211	0.1185	0.34967	0.078452	0.2189	0.098314	0.10885	0.075391	0.21612	0.12737	0.20234	0.073179	0.070976	0.4544	0.070916	0.07158	0.61955	0.17021	0.84964	0.22306	0.072173	0.72762	0.08787	0.12425	0.071075	0.10498	0.50862	0.087773	0.076984	0.1975	0.1747	0.42886	0.10382	0.46376	0.1019	0.75212	0.81779	0.13949	0.8652	0.51556	0.18211	0.10607
642	0.88299	0.87173	0.38318	0.080705	0.094273	0.072101	0.20338	0.36217	0.12148	0.38446	0.074335	0.22677	0.10074	0.11152	0.077167	0.22368	0.10734	0.2085	0.071467	0.071539	0.39907	0.071274	0.072624	0.71912	0.13937	0.79811	0.23142	0.073434	0.82087	0.090111	0.12749	0.070936	0.10755	0.58938	0.090011	0.078883	0.1612	0.17877	0.3742	0.10635	0.40819	0.10439	0.83959	0.87972	0.14363	0.81688	0.45883	0.18668	0.10867
643	0.8424	0.8949	0.4271	0.082778	0.096617	0.07335	0.20956	0.40007	0.12458	0.42874	0.072017	0.23548	0.1032	0.11425	0.079079	0.23201	0.093281	0.21517	0.070873	0.072578	0.34526	0.072166	0.074009	0.81227	0.11603	0.74155	0.24074	0.074975	0.87913	0.092387	0.13086	0.071471	0.11017	0.68467	0.092286	0.080885	0.13239	0.18303	0.3213	0.10895	0.35409	0.10693	0.88697	0.89454	0.14806	0.76179	0.4033	0.1915	0.11132
644	0.79114	0.87846	0.48337	0.084911	0.098999	0.074882	0.21625	0.44841	0.1278	0.48546	0.070988	0.2452	0.10571	0.11706	0.081091	0.24128	0.083779	0.22243	0.07108	0.07396	0.2936	0.073443	0.075639	0.87281	0.099294	0.68304	0.25121	0.076717	0.89116	0.094697	0.1344	0.072491	0.11286	0.78084	0.094595	0.082964	0.11093	0.18751	0.27099	0.1116	0.302	0.10953	0.88897	0.87274	0.15283	0.70383	0.34926	0.19661	0.11404
645	0.73488	0.83935	0.55465	0.087091	0.10142	0.076618	0.22353	0.51013	0.13116	0.55726	0.070884	0.25617	0.10827	0.11996	0.083177	0.25168	0.077604	0.2304	0.071865	0.075588	0.2452	0.074995	0.077446	0.88807	0.087795	0.62415	0.2631	0.078604	0.86802	0.097042	0.13813	0.073859	0.11561	0.85325	0.096938	0.085101	0.09574	0.19222	0.22458	0.11432	0.25295	0.11219	0.85984	0.83093	0.15801	0.645	0.29733	0.20204	0.11683
646	0.67664	0.78908	0.64086	0.089311	0.10388	0.0785	0.23152	0.58719	0.13467	0.64387	0.071444	0.26867	0.11089	0.12296	0.085318	0.26348	0.073818	0.23921	0.073064	0.077392	0.20158	0.076745	0.079379	0.86743	0.080178	0.5656	0.27677	0.080596	0.82573	0.099423	0.14207	0.075476	0.11845	0.88322	0.099317	0.087284	0.08541	0.1972	0.18373	0.11711	0.20841	0.11492	0.81454	0.77934	0.16367	0.58629	0.24857	0.20786	0.11971
647	0.61793	0.73346	0.73405	0.091564	0.10639	0.080488	0.24034	0.67703	0.13837	0.73702	0.072482	0.2831	0.11357	0.12606	0.087504	0.27702	0.071739	0.24903	0.07456	0.079323	0.16441	0.078637	0.081404	0.82661	0.07536	0.50779	0.29269	0.082666	0.77401	0.10184	0.14627	0.077272	0.12138	0.87327	0.10173	0.089505	0.078641	0.20249	0.14993	0.11999	0.17007	0.11773	0.76133	0.72312	0.16994	0.52819	0.2045	0.2141	0.12269
648	0.55951	0.6756	0.81521	0.093851	0.10895	0.082554	0.25017	0.76741	0.14228	0.81738	0.073862	0.29997	0.11633	0.12929	0.089727	0.29274	0.070882	0.26009	0.076268	0.081347	0.13476	0.080631	0.083498	0.77576	0.072545	0.45093	0.31148	0.084793	0.71783	0.1043	0.15075	0.079197	0.12441	0.83833	0.10419	0.09176	0.074433	0.20811	0.12378	0.12297	0.13914	0.12062	0.70447	0.66505	0.17695	0.47096	0.16679	0.22085	0.12577
649	0.50178	0.61711	0.86287	0.096169	0.11156	0.084678	0.26122	0.83691	0.14644	0.8637	0.075488	0.31997	0.11916	0.13266	0.091982	0.31126	0.070902	0.27266	0.078129	0.083438	0.11261	0.082701	0.085644	0.72008	0.071161	0.39524	0.33399	0.086966	0.65984	0.10681	0.15558	0.081215	0.12755	0.79061	0.1067	0.094046	0.072053	0.21412	0.10473	0.12604	0.1158	0.1236	0.64625	0.60654	0.18491	0.41481	0.13659	0.22817	0.12897
650	0.44497	0.5588	0.86979	0.09852	0.11424	0.086847	0.27378	0.86812	0.15088	0.8694	0.077289	0.34402	0.12208	0.13618	0.09427	0.33338	0.071551	0.28713	0.0801	0.085582	0.096902	0.084827	0.087832	0.66237	0.070802	0.34112	0.36134	0.089177	0.60143	0.10937	0.16082	0.083303	0.13081	0.73655	0.10925	0.096365	0.070981	0.22059	0.091485	0.12924	0.099121	0.1267	0.58784	0.54831	0.19408	0.36005	0.11394	0.23619	0.1323
651	0.38934	0.5011	0.84591	0.10091	0.11699	0.089054	0.28822	0.86147	0.15565	0.84475	0.079215	0.37336	0.1251	0.13989	0.096588	0.36018	0.072652	0.30399	0.082152	0.087767	0.086199	0.086998	0.090054	0.60408	0.07118	0.28927	0.39504	0.09142	0.54329	0.11198	0.16656	0.085442	0.13423	0.67958	0.11186	0.098716	0.070847	0.22757	0.082604	0.13258	0.087687	0.12991	0.52981	0.49075	0.20484	0.30727	0.097826	0.24501	0.13579
652	0.33533	0.44428	0.8045	0.10333	0.11982	0.091293	0.305	0.82966	0.16082	0.80294	0.081234	0.40958	0.12823	0.14381	0.098938	0.39306	0.074077	0.32388	0.084263	0.089986	0.079171	0.089206	0.092308	0.54599	0.072087	0.2409	0.43695	0.093694	0.48581	0.11465	0.17291	0.087623	0.1378	0.62156	0.11453	0.1011	0.071386	0.23515	0.076888	0.13606	0.080131	0.13326	0.47252	0.43412	0.21776	0.25749	0.086825	0.2548	0.13945
653	0.28372	0.38861	0.75401	0.10579	0.12273	0.093562	0.32477	0.78418	0.16647	0.75225	0.083319	0.4546	0.13148	0.14797	0.10132	0.4338	0.075733	0.34767	0.08642	0.092237	0.074783	0.091445	0.094592	0.48849	0.073372	0.19761	0.48914	0.095997	0.42926	0.1174	0.18001	0.089839	0.14157	0.56346	0.11727	0.10352	0.072408	0.24343	0.073436	0.13972	0.075365	0.13677	0.41623	0.3787	0.23366	0.2122	0.079585	0.26576	0.14332
654	0.23577	0.33456	0.69901	0.1083	0.12574	0.095861	0.34835	0.73174	0.1727	0.69715	0.085456	0.51037	0.13488	0.1524	0.10375	0.48436	0.077555	0.37648	0.088615	0.094517	0.072277	0.093715	0.096906	0.43188	0.074928	0.16103	0.55314	0.098332	0.37395	0.12022	0.18806	0.092085	0.14555	0.5058	0.12009	0.10599	0.073775	0.25255	0.071598	0.14359	0.07259	0.14045	0.36128	0.32502	0.25385	0.17308	0.075045	0.27814	0.14742
655	0.19312	0.28294	0.64198	0.11087	0.12885	0.098191	0.37684	0.67587	0.17964	0.64009	0.087632	0.57777	0.13843	0.15717	0.10621	0.54626	0.079495	0.41175	0.090841	0.096827	0.071117	0.096013	0.099252	0.37648	0.076678	0.13213	0.62807	0.1007	0.32042	0.12312	0.19733	0.094361	0.14978	0.44891	0.12299	0.1085	0.07539	0.26265	0.070917	0.14768	0.071237	0.14433	0.3083	0.27395	0.28042	0.14144	0.072433	0.29226	0.15179
656	0.15736	0.23501	0.5843	0.11348	0.13209	0.10055	0.41159	0.61857	0.18749	0.5824	0.089842	0.65427	0.14217	0.16233	0.10872	0.6188	0.081521	0.45515	0.093097	0.099168	0.07092	0.098342	0.10163	0.32284	0.078566	0.11072	0.70739	0.1031	0.26963	0.12612	0.20819	0.096666	0.1543	0.39309	0.12599	0.11106	0.077181	0.27394	0.071063	0.15204	0.070903	0.14845	0.25833	0.22687	0.31685	0.11748	0.071197	0.30856	0.15647
657	0.12937	0.19245	0.52671	0.11616	0.13547	0.10295	0.45421	0.56094	0.19649	0.52483	0.092082	0.7313	0.14612	0.16797	0.11128	0.69658	0.083611	0.50832	0.095381	0.10154	0.071413	0.1007	0.10405	0.27186	0.080553	0.095661	0.77767	0.10554	0.22296	0.12923	0.2212	0.099001	0.15916	0.33881	0.12909	0.11367	0.079098	0.28666	0.071802	0.15671	0.071297	0.15284	0.21287	0.18546	0.36901	0.10035	0.070944	0.32755	0.16153
658	0.10878	0.15684	0.46964	0.11891	0.13901	0.10538	0.50623	0.50356	0.20699	0.46777	0.09435	0.79358	0.15032	0.17417	0.11389	0.76693	0.085748	0.57193	0.097694	0.10395	0.072401	0.1031	0.1065	0.22495	0.082613	0.085453	0.82263	0.10803	0.18213	0.13246	0.23718	0.10137	0.16444	0.28688	0.13231	0.11635	0.081107	0.30113	0.072966	0.16176	0.072214	0.15755	0.17363	0.15123	0.44701	0.088601	0.071398	0.34995	0.16703
659	0.094356	0.12901	0.41342	0.12173	0.14272	0.10786	0.56831	0.44681	0.21949	0.41159	0.096646	0.82703	0.15479	0.18107	0.11656	0.8141	0.087923	0.64381	0.10004	0.1064	0.073744	0.10553	0.109	0.18383	0.084727	0.078791	0.83476	0.11056	0.14859	0.13583	0.25738	0.10377	0.1702	0.23856	0.13567	0.11909	0.083182	0.31775	0.074434	0.16724	0.073506	0.16263	0.14191	0.12479	0.56631	0.080821	0.072358	0.37664	0.17308
660	0.084624	0.10856	0.35849	0.12464	0.14664	0.11038	0.63835	0.39106	0.23472	0.35672	0.09897	0.82898	0.1596	0.18884	0.11931	0.82977	0.090129	0.71623	0.10241	0.10889	0.07534	0.108	0.11155	0.14995	0.086883	0.074671	0.81907	0.11314	0.12284	0.13935	0.28382	0.10621	0.17656	0.19551	0.13918	0.12192	0.085307	0.33701	0.07612	0.17327	0.075066	0.16817	0.1179	0.10556	0.73958	0.075904	0.073681	0.40871	0.17978
661	0.078311	0.094244	0.30556	0.12764	0.15079	0.11295	0.70923	0.33684	0.25382	0.30386	0.10133	0.80642	0.1648	0.19773	0.12212	0.81733	0.092364	0.77598	0.10483	0.11143	0.077116	0.11052	0.11415	0.12387	0.089072	0.072363	0.78481	0.11579	0.1042	0.14304	0.31979	0.10869	0.18365	0.15935	0.14287	0.12482	0.087471	0.35956	0.077961	0.17994	0.076816	0.17425	0.10072	0.092193	0.9332	0.073028	0.075262	0.4474	0.18731
662	0.074442	0.0846	0.25573	0.13075	0.15522	0.11558	0.76851	0.285	0.27855	0.25416	0.10372	0.76821	0.17047	0.20806	0.12503	0.78547	0.094626	0.81044	0.10728	0.11402	0.079021	0.11309	0.11681	0.10495	0.091291	0.071347	0.73964	0.11849	0.09129	0.14694	0.37086	0.11122	0.19167	0.13096	0.14676	0.12782	0.089667	0.38617	0.079912	0.18743	0.078703	0.18099	0.088936	0.083248	1.0452	0.071606	0.077028	0.49388	0.19588
663	0.072314	0.078353	0.21057	0.13398	0.15996	0.11828	0.80391	0.23685	0.31179	0.20918	0.10614	0.72097	0.1767	0.22031	0.12802	0.74192	0.096914	0.81576	0.10977	0.11667	0.081019	0.11572	0.11954	0.091829	0.093536	0.071254	0.68846	0.12127	0.082682	0.15106	0.44636	0.1138	0.20085	0.11002	0.15087	0.13093	0.091891	0.41776	0.081943	0.19594	0.080687	0.18855	0.081144	0.077502	1.0469	0.071224	0.078925	0.54864	0.20578
664	0.071426	0.074532	0.17177	0.13734	0.16509	0.12104	0.81101	0.19407	0.35834	0.17062	0.10861	0.66882	0.18364	0.23515	0.13112	0.69182	0.09923	0.79702	0.11231	0.11939	0.083084	0.11841	0.12234	0.083068	0.095808	0.071823	0.63416	0.12412	0.077178	0.15546	0.56034	0.11644	0.21156	0.095334	0.15525	0.13415	0.094142	0.45528	0.084033	0.20576	0.082742	0.19716	0.076222	0.074038	1.0021	0.071586	0.080916	0.61033	0.21744
665	0.071426	0.072439	0.14057	0.14085	0.17066	0.12388	0.79413	0.15826	0.42624	0.13968	0.11112	0.61413	0.19144	0.25362	0.13434	0.63822	0.10158	0.7621	0.11491	0.12217	0.085199	0.12117	0.12522	0.077455	0.098106	0.072865	0.5784	0.12706	0.073886	0.16016	0.72445	0.11914	0.2243	0.085418	0.15993	0.13751	0.096418	0.49951	0.086167	0.21731	0.084849	0.20711	0.073345	0.072199	0.94386	0.07248	0.082976	0.67413	0.23147
666	0.072061	0.071577	0.11708	0.14454	0.17677	0.1268	0.76074	0.13024	0.52803	0.11643	0.11368	0.55829	0.20035	0.27733	0.13769	0.5829	0.10395	0.7174	0.11756	0.12504	0.087352	0.124	0.12819	0.074087	0.10043	0.074245	0.52212	0.13011	0.07217	0.16523	0.91134	0.12192	0.2398	0.078978	0.16499	0.14101	0.098721	0.55049	0.088336	0.23118	0.086997	0.21881	0.071924	0.071518	0.88236	0.073753	0.085087	0.73105	0.24878
667	0.07315	0.071595	0.10034	0.14842	0.18355	0.12982	0.71719	0.10964	0.6772	0.099884	0.1163	0.50214	0.21067	0.30887	0.14119	0.52691	0.10637	0.66712	0.12028	0.128	0.089537	0.12692	0.13126	0.072317	0.10279	0.075866	0.46595	0.13326	0.071579	0.17074	1.0284	0.12477	0.25919	0.075023	0.17047	0.14469	0.10105	0.60657	0.090534	0.24825	0.089177	0.23288	0.071543	0.071667	0.82125	0.075298	0.087236	0.77062	0.27077
668	0.074563	0.072243	0.088886	0.15253	0.19114	0.13295	0.66774	0.095218	0.86153	0.088583	0.11897	0.44622	0.22286	0.35247	0.14486	0.47091	0.10882	0.6138	0.12307	0.13105	0.091749	0.12994	0.13445	0.071687	0.10518	0.077658	0.41036	0.13653	0.07179	0.17677	1.0384	0.1277	0.28421	0.072836	0.17647	0.14856	0.10342	0.66329	0.092759	0.26988	0.091384	0.25023	0.071905	0.072408	0.76176	0.077036	0.089417	0.78651	0.29967
669	0.076207	0.073341	0.081343	0.15689	0.19976	0.13619	0.61502	0.085503	1.0036	0.081148	0.12171	0.39105	0.23758	0.41516	0.14872	0.41539	0.11131	0.55897	0.12594	0.13422	0.093986	0.13306	0.13776	0.071871	0.1076	0.079571	0.35591	0.13994	0.072577	0.18344	0.99751	0.13073	0.31767	0.071908	0.1831	0.15266	0.10581	0.71323	0.095008	0.2982	0.093617	0.27224	0.072799	0.073572	0.70435	0.078912	0.091626	0.77937	0.3391
670	0.078014	0.074761	0.076606	0.16156	0.2097	0.13957	0.56062	0.079213	1.0387	0.076488	0.12453	0.33723	0.25582	0.50798	0.1528	0.36092	0.11386	0.50355	0.12889	0.1375	0.096248	0.13629	0.14122	0.072638	0.11007	0.081573	0.30339	0.14351	0.073773	0.19089	0.9408	0.13387	0.36416	0.07188	0.19051	0.15701	0.10824	0.74812	0.097282	0.33669	0.095875	0.3011	0.074073	0.075038	0.64914	0.080885	0.093859	0.75438	0.39505
671	0.079939	0.076408	0.073864	0.16658	0.22137	0.1431	0.50551	0.075367	1.0065	0.073801	0.12743	0.28571	0.27907	0.64385	0.15713	0.30828	0.11645	0.44818	0.13195	0.14093	0.098535	0.13967	0.14484	0.07382	0.11258	0.083638	0.25401	0.14725	0.075262	0.19933	0.87959	0.13714	0.43125	0.072495	0.19889	0.16165	0.11072	0.76277	0.099581	0.39106	0.098157	0.34037	0.075616	0.076719	0.59609	0.08293	0.096116	0.71731	0.4771
672	0.081947	0.078218	0.072542	0.17201	0.23534	0.1468	0.45035	0.07326	0.9527	0.072518	0.13042	0.23784	0.30974	0.81864	0.16176	0.25862	0.1191	0.39338	0.13511	0.14452	0.10085	0.14319	0.14864	0.075299	0.11514	0.08575	0.20937	0.15119	0.076959	0.20902	0.81832	0.14053	0.53036	0.073568	0.20852	0.16665	0.11324	0.75719	0.10191	0.47047	0.10047	0.39588	0.077352	0.078553	0.54499	0.085026	0.098399	0.67265	0.59811
673	0.084016	0.080143	0.072232	0.17795	0.25248	0.1507	0.3957	0.07239	0.89219	0.072236	0.13351	0.1953	0.3517	0.97218	0.16673	0.21352	0.12182	0.33983	0.1384	0.14828	0.10319	0.14687	0.15264	0.076988	0.11776	0.087898	0.17115	0.15537	0.078804	0.22035	0.75838	0.14408	0.67308	0.074969	0.21975	0.17206	0.1158	0.73516	0.10427	0.58744	0.1028	0.47694	0.079225	0.080496	0.49559	0.087162	0.10071	0.62343	0.76269
674	0.086131	0.082152	0.072646	0.1845	0.27409	0.15482	0.34223	0.072403	0.83064	0.07267	0.13672	0.15968	0.41128	1.0298	0.17211	0.17468	0.12461	0.28846	0.14183	0.15224	0.10556	0.15076	0.15689	0.078827	0.12043	0.090076	0.14051	0.15981	0.080754	0.23384	0.70034	0.1478	0.84761	0.076603	0.23312	0.17797	0.11843	0.70136	0.10666	0.74779	0.10517	0.59586	0.081195	0.082516	0.4476	0.08933	0.10304	0.57159	0.93059
675	0.088281	0.08422	0.073576	0.19178	0.30221	0.15919	0.29086	0.073047	0.77015	0.073614	0.14005	0.1318	0.49829	1.0081	0.17797	0.14334	0.12747	0.24062	0.14541	0.15644	0.10797	0.15486	0.16142	0.080772	0.12317	0.092279	0.11751	0.16456	0.08278	0.25029	0.64437	0.15172	0.98613	0.078402	0.24939	0.18447	0.12111	0.65976	0.10908	0.91692	0.10757	0.75706	0.083235	0.084594	0.40074	0.091524	0.10541	0.51836	1.0202
676	0.090459	0.086333	0.074873	0.19999	0.34009	0.16387	0.24292	0.074141	0.71139	0.074921	0.14353	0.11128	0.62454	0.95812	0.18441	0.11967	0.13043	0.19797	0.14917	0.16091	0.11042	0.15921	0.16627	0.082795	0.12598	0.094507	0.10115	0.16967	0.084861	0.27088	0.59043	0.15586	1.0258	0.080319	0.26973	0.1917	0.12386	0.61322	0.11155	1.0141	0.11001	0.923	0.085328	0.086714	0.35486	0.093742	0.10781	0.46455	1.017
677	0.092662	0.088481	0.076432	0.20937	0.39301	0.16889	0.20008	0.075556	0.65463	0.076488	0.14717	0.096909	0.78912	0.89918	0.19157	0.10275	0.13347	0.16212	0.15312	0.16569	0.11291	0.16386	0.1715	0.084873	0.12887	0.096757	0.089986	0.17522	0.086983	0.29744	0.53837	0.16026	0.99708	0.08232	0.29593	0.19983	0.12669	0.56365	0.11406	1.0172	0.11249	1.0142	0.087459	0.088868	0.31005	0.095984	0.11025	0.41083	0.97263
678	0.094889	0.090658	0.078178	0.22025	0.46924	0.17432	0.16395	0.077198	0.59987	0.078238	0.15099	0.087236	0.94419	0.83781	0.19962	0.091162	0.13663	0.13392	0.15731	0.17083	0.11544	0.16885	0.17718	0.086993	0.13185	0.099031	0.082658	0.18127	0.089139	0.33286	0.48793	0.16496	0.94549	0.084382	0.3308	0.2091	0.12959	0.51232	0.11662	0.97522	0.11502	1.0137	0.089621	0.091049	0.26676	0.098248	0.11273	0.35787	0.91574
679	0.097138	0.092859	0.080055	0.2331	0.57986	0.18023	0.13544	0.079002	0.547	0.080119	0.15501	0.08098	1.0154	0.77697	0.20878	0.083526	0.13991	0.1131	0.16176	0.17641	0.11803	0.17424	0.1834	0.089146	0.13494	0.10133	0.078079	0.18795	0.091321	0.3818	0.43884	0.17	0.88593	0.086489	0.3789	0.21985	0.13259	0.46013	0.11923	0.91908	0.11759	0.9708	0.091809	0.093254	0.2259	0.10054	0.11526	0.30654	0.85476
680	0.099411	0.095083	0.082027	0.24862	0.7303	0.18674	0.1143	0.080921	0.49578	0.082093	0.15928	0.077166	1.0036	0.71757	0.21936	0.078729	0.14331	0.098468	0.16652	0.1825	0.12067	0.18011	0.19028	0.091325	0.13813	0.10366	0.075456	0.19538	0.093527	0.45163	0.39089	0.17547	0.82462	0.088631	0.44741	0.23251	0.13569	0.40778	0.1219	0.85822	0.12022	0.91434	0.094021	0.095482	0.1888	0.10285	0.11783	0.25808	0.79362
681	0.10171	0.097329	0.084066	0.2678	0.89227	0.19396	0.099421	0.082922	0.44596	0.084135	0.16382	0.075085	0.9578	0.66001	0.23181	0.075951	0.14687	0.088596	0.17163	0.18921	0.12337	0.18656	0.19796	0.093529	0.14144	0.10601	0.074222	0.20377	0.095756	0.55259	0.34401	0.18142	0.76394	0.090802	0.5465	0.24776	0.1389	0.35603	0.12464	0.79697	0.12292	0.85343	0.096256	0.097733	0.15689	0.1052	0.12046	0.21405	0.73367
682	0.10403	0.099599	0.086155	0.29218	0.9944	0.20207	0.089358	0.084983	0.39731	0.086225	0.16868	0.074238	0.90046	0.60437	0.24674	0.074607	0.1506	0.082198	0.17717	0.19669	0.12614	0.1937	0.20664	0.095756	0.1449	0.1084	0.073977	0.21334	0.098007	0.69257	0.29841	0.18796	0.70474	0.092997	0.68449	0.26655	0.14223	0.30578	0.12744	0.73682	0.12567	0.79222	0.098513	0.10001	0.1311	0.10757	0.12315	0.17612	0.67544
683	0.10639	0.10189	0.088283	0.32415	1.0064	0.2113	0.082823	0.087089	0.34977	0.088354	0.17391	0.074268	0.83946	0.55054	0.26509	0.074284	0.15453	0.078284	0.1832	0.20512	0.12899	0.20171	0.21659	0.098004	0.1485	0.11082	0.074436	0.22444	0.10028	0.85409	0.25471	0.19523	0.64735	0.095215	0.84606	0.29036	0.14571	0.25826	0.13033	0.67834	0.12851	0.73212	0.10079	0.10231	0.11148	0.10998	0.12591	0.14547	0.61907
684	0.10877	0.10421	0.09044	0.36748	0.96922	0.22195	0.078812	0.089228	0.30352	0.090512	0.17959	0.074923	0.77842	0.49835	0.28823	0.074688	0.15867	0.076134	0.18985	0.21474	0.13192	0.21081	0.22819	0.10028	0.15229	0.11329	0.075396	0.23756	0.10258	0.97393	0.21402	0.20338	0.59183	0.097455	0.96976	0.32144	0.14934	0.21505	0.13331	0.62171	0.13142	0.67366	0.1031	0.10463	0.097303	0.11243	0.12874	0.12226	0.56455
685	0.1112	0.10656	0.092623	0.42808	0.91531	0.23445	0.076594	0.091396	0.25916	0.092696	0.18579	0.076023	0.71854	0.44755	0.31829	0.075609	0.16306	0.075238	0.19723	0.2259	0.13494	0.22129	0.24196	0.10257	0.15627	0.11579	0.076714	0.25338	0.10491	1.0049	0.17779	0.21265	0.53806	0.099718	1.0051	0.36338	0.15315	0.17776	0.13638	0.5669	0.13442	0.61704	0.10543	0.10699	0.087474	0.11492	0.13165	0.10562	0.51169
686	0.11366	0.10895	0.094828	0.51455	0.85527	0.24942	0.07565	0.093587	0.21776	0.094902	0.19262	0.077439	0.66029	0.39797	0.35864	0.076898	0.16774	0.075235	0.20552	0.23907	0.13806	0.23356	0.25865	0.1049	0.16048	0.11835	0.078284	0.27291	0.10727	0.97598	0.14737	0.22335	0.48585	0.10201	0.97813	0.42175	0.15716	0.14754	0.13955	0.51376	0.13753	0.56222	0.1078	0.10938	0.080938	0.11745	0.13465	0.094216	0.46028
687	0.11616	0.11136	0.097056	0.63572	0.79413	0.26777	0.075612	0.095801	0.18079	0.09713	0.20024	0.07908	0.60384	0.34954	0.41449	0.078448	0.17276	0.075865	0.21496	0.25494	0.1413	0.24821	0.2794	0.10725	0.16495	0.12096	0.080035	0.29769	0.10965	0.92514	0.1234	0.23591	0.43499	0.10432	0.92796	0.50477	0.1614	0.12456	0.14285	0.46208	0.14074	0.50904	0.1102	0.1118	0.076827	0.12004	0.13775	0.086699	0.41013
688	0.11871	0.11382	0.099306	0.78687	0.7337	0.29082	0.076218	0.098037	0.14963	0.099381	0.20882	0.08088	0.54912	0.30251	0.4936	0.080183	0.17818	0.076947	0.22587	0.27451	0.14466	0.26609	0.30589	0.10963	0.16972	0.12362	0.081913	0.33006	0.11208	0.86621	0.10558	0.25094	0.38533	0.10666	0.86927	0.62136	0.16591	0.10804	0.14628	0.41166	0.14408	0.45729	0.11263	0.11426	0.07448	0.12268	0.14096	0.081988	0.36115
689	0.12131	0.11632	0.10158	0.92468	0.67469	0.32063	0.077282	0.1003	0.12499	0.10165	0.21861	0.082793	0.49598	0.25753	0.6049	0.08205	0.18406	0.078349	0.23868	0.29929	0.14816	0.28847	0.34075	0.11205	0.17483	0.12635	0.083883	0.3737	0.11454	0.8052	0.092937	0.26932	0.33688	0.10903	0.80829	0.76931	0.17072	0.096684	0.14986	0.36243	0.14755	0.4068	0.1151	0.11677	0.073414	0.12538	0.14429	0.079275	0.3135
690	0.12397	0.11886	0.10388	0.98974	0.61735	0.36038	0.078671	0.10258	0.10662	0.10395	0.22997	0.084787	0.44422	0.21573	0.74853	0.084012	0.1905	0.079979	0.25403	0.3316	0.15182	0.31728	0.38809	0.11451	0.18036	0.12914	0.085918	0.43428	0.11705	0.74451	0.084324	0.2924	0.29	0.11144	0.74755	0.91036	0.17588	0.089188	0.15361	0.31455	0.15118	0.35751	0.11762	0.11932	0.073276	0.12815	0.14776	0.077981	0.26774
691	0.1267	0.12145	0.1062	0.98051	0.56171	0.415	0.080291	0.10489	0.093567	0.10628	0.24335	0.086841	0.39369	0.17862	0.89241	0.086041	0.19763	0.08177	0.27283	0.37504	0.15566	0.3555	0.4541	0.11701	0.18638	0.13201	0.088002	0.51973	0.1196	0.68503	0.078706	0.32218	0.2455	0.11388	0.688	0.98436	0.18147	0.084488	0.15755	0.26857	0.15499	0.30962	0.12019	0.12193	0.073812	0.13099	0.15139	0.077695	0.22491
692	0.12949	0.1241	0.10856	0.93725	0.50765	0.49164	0.082075	0.10722	0.084658	0.10863	0.25946	0.088939	0.34441	0.14755	0.97666	0.08812	0.20558	0.083676	0.29645	0.43508	0.1597	0.40772	0.54702	0.11956	0.19298	0.13497	0.090124	0.63769	0.12221	0.62713	0.075274	0.3618	0.20465	0.11636	0.63002	0.98167	0.18755	0.081784	0.1617	0.22553	0.15899	0.26375	0.12281	0.12459	0.074836	0.13391	0.15518	0.078124	0.18646
693	0.13235	0.12682	0.11094	0.88172	0.45499	0.59847	0.083976	0.10959	0.078831	0.11102	0.27928	0.09107	0.29669	0.12318	0.98244	0.090237	0.21456	0.085664	0.32696	0.5194	0.16397	0.4807	0.67278	0.12216	0.20029	0.13802	0.092275	0.78256	0.12487	0.5709	0.073424	0.41603	0.16898	0.11889	0.57369	0.94094	0.19422	0.080497	0.1661	0.1869	0.16321	0.221	0.12549	0.12731	0.076214	0.13693	0.15917	0.079061	0.15385
694	0.1353	0.1296	0.11336	0.82159	0.4036	0.73602	0.08596	0.11199	0.07525	0.11344	0.30429	0.09323	0.25131	0.10513	0.94519	0.092385	0.22484	0.087713	0.36754	0.63528	0.16851	0.58254	0.81865	0.12481	0.20846	0.14117	0.094451	0.91393	0.1276	0.51623	0.072721	0.49181	0.13971	0.12147	0.51894	0.88649	0.20162	0.080215	0.17078	0.15413	0.1677	0.18287	0.12823	0.1301	0.077851	0.14004	0.16338	0.080359	0.12793
695	0.13834	0.13245	0.11582	0.76075	0.35348	0.87615	0.088006	0.11442	0.073295	0.1159	0.33676	0.095414	0.2095	0.09239	0.89213	0.094559	0.23679	0.089807	0.42304	0.77732	0.17334	0.71557	0.93603	0.12753	0.21771	0.14444	0.09665	0.97744	0.13039	0.46299	0.072847	0.59695	0.11719	0.1241	0.46563	0.82673	0.2099	0.080648	0.17579	0.12808	0.17247	0.15077	0.13104	0.13297	0.079677	0.14326	0.16785	0.081913	0.10852
696	0.14148	0.13538	0.11832	0.70062	0.30491	0.96331	0.090097	0.1169	0.072517	0.11841	0.38012	0.097621	0.17283	0.083736	0.8329	0.096755	0.25093	0.091935	0.50032	0.90708	0.17853	0.85693	0.97928	0.13031	0.22833	0.14783	0.098871	0.9704	0.13326	0.41103	0.073574	0.73185	0.10078	0.12679	0.4136	0.7659	0.21928	0.081586	0.18119	0.10859	0.17759	0.12546	0.13393	0.13592	0.081643	0.1466	0.17261	0.083648	0.094697
697	0.14473	0.1384	0.12087	0.64179	0.25859	0.975	0.092224	0.11941	0.072589	0.12096	0.43956	0.09985	0.14257	0.078108	0.77214	0.098974	0.26799	0.094092	0.60666	0.97188	0.18414	0.95334	0.96043	0.13317	0.24071	0.15136	0.10111	0.92883	0.13621	0.36035	0.074736	0.8698	0.089337	0.12955	0.36285	0.70565	0.23006	0.082884	0.18703	0.094709	0.18311	0.10665	0.1369	0.13896	0.083714	0.15007	0.1777	0.085513	0.085237
698	0.14811	0.14153	0.12347	0.58448	0.21573	0.94121	0.094379	0.12198	0.073277	0.12356	0.52207	0.1021	0.11918	0.074678	0.71177	0.10121	0.28905	0.096274	0.74089	0.96688	0.19023	0.97452	0.9146	0.13611	0.2554	0.15505	0.10338	0.87424	0.13925	0.3112	0.076213	0.95732	0.081666	0.13237	0.3136	0.64663	0.24263	0.084436	0.19341	0.085211	0.1891	0.093333	0.13996	0.1421	0.085868	0.1537	0.18319	0.087471	0.079022
699	0.15162	0.14476	0.12613	0.52868	0.17789	0.88982	0.09656	0.1246	0.07441	0.12621	0.6339	0.10437	0.10208	0.072836	0.65252	0.10348	0.3157	0.098479	0.87442	0.92652	0.1969	0.94529	0.85833	0.13914	0.27317	0.15892	0.10567	0.81465	0.14239	0.26424	0.077919	0.97098	0.076757	0.13528	0.2665	0.58908	0.25757	0.08617	0.20043	0.078972	0.19566	0.084264	0.14313	0.14535	0.088087	0.15749	0.18914	0.089497	0.07517
700	0.15529	0.14811	0.12884	0.4743	0.14644	0.83141	0.098764	0.12728	0.075866	0.12893	0.76952	0.10667	0.090132	0.07214	0.5947	0.10577	0.35033	0.10071	0.95544	0.87256	0.20428	0.89576	0.7983	0.14226	0.29519	0.16299	0.10799	0.754	0.14564	0.22064	0.079793	0.93868	0.07385	0.13827	0.2227	0.53303	0.27568	0.088034	0.20823	0.075104	0.20289	0.078341	0.14642	0.14873	0.090364	0.16147	0.19565	0.091573	0.073024
701	0.15914	0.15159	0.13162	0.42122	0.12195	0.77092	0.10099	0.13001	0.077555	0.13171	0.89378	0.109	0.082095	0.072273	0.53837	0.10808	0.39658	0.10296	0.96531	0.81328	0.21252	0.8381	0.73769	0.1455	0.32314	0.16729	0.11033	0.69383	0.14901	0.18194	0.08179	0.88799	0.072387	0.14135	0.18372	0.4784	0.29813	0.089991	0.21699	0.072948	0.21095	0.074704	0.14982	0.15224	0.092691	0.16567	0.20282	0.093689	0.07211
702	0.16317	0.15523	0.13447	0.36944	0.10395	0.71052	0.10324	0.13282	0.079415	0.13457	0.95855	0.11136	0.076929	0.073005	0.48344	0.11042	0.45968	0.10523	0.93188	0.75272	0.22183	0.77781	0.67777	0.14885	0.35959	0.17184	0.11271	0.6348	0.15252	0.14958	0.083881	0.82995	0.071965	0.14454	0.15102	0.42507	0.32667	0.092018	0.22695	0.072027	0.22004	0.072715	0.15337	0.1559	0.095066	0.17012	0.2108	0.095837	0.072085
703	0.16743	0.15903	0.13741	0.31921	0.091326	0.65107	0.10551	0.1357	0.0814	0.13751	0.95681	0.11375	0.07384	0.074169	0.42982	0.1128	0.54616	0.10753	0.88094	0.69253	0.23247	0.71735	0.61905	0.15234	0.40833	0.17669	0.11512	0.57717	0.15619	0.12423	0.086045	0.76962	0.072297	0.14784	0.12532	0.37305	0.36391	0.094096	0.23844	0.071997	0.2304	0.071914	0.15708	0.15974	0.097489	0.17484	0.21978	0.098011	0.072703
704	0.17194	0.16302	0.14043	0.27116	0.082801	0.59293	0.10781	0.13867	0.08348	0.14053	0.91879	0.11617	0.072247	0.075645	0.37751	0.1152	0.66011	0.10985	0.82294	0.63341	0.24483	0.65773	0.56173	0.15597	0.47476	0.18189	0.11757	0.52095	0.16002	0.10553	0.088268	0.70925	0.073171	0.15127	0.10631	0.32256	0.41373	0.096215	0.25189	0.072611	0.24239	0.071972	0.16096	0.16377	0.099962	0.17989	0.23001	0.10021	0.073784
705	0.17674	0.16722	0.14355	0.22642	0.077288	0.53618	0.11014	0.14172	0.085633	0.14365	0.86624	0.11863	0.071733	0.077348	0.32671	0.11765	0.79104	0.11221	0.76272	0.57563	0.25943	0.59935	0.5058	0.15978	0.56516	0.18749	0.12006	0.46609	0.16405	0.092356	0.090542	0.64974	0.074438	0.15484	0.092894	0.27421	0.48155	0.098367	0.26793	0.07369	0.25651	0.072649	0.16504	0.16802	0.10249	0.18532	0.24182	0.10243	0.075201
706	0.18187	0.17167	0.14677	0.18655	0.073952	0.48079	0.11249	0.14488	0.087845	0.14688	0.80774	0.12114	0.071997	0.079216	0.27801	0.12013	0.9012	0.1146	0.70242	0.51922	0.27699	0.54234	0.4512	0.16377	0.68189	0.19356	0.12259	0.41252	0.16829	0.083435	0.092862	0.59147	0.075989	0.15856	0.083791	0.22912	0.57345	0.10055	0.28744	0.075104	0.27342	0.073773	0.16935	0.17251	0.10507	0.19119	0.25568	0.10468	0.076859
707	0.18739	0.17639	0.15011	0.15303	0.072184	0.4267	0.11488	0.14814	0.090107	0.15022	0.74751	0.12368	0.072823	0.081204	0.23249	0.12266	0.95051	0.11702	0.64296	0.46415	0.29856	0.48668	0.39789	0.16797	0.81025	0.20019	0.12517	0.3603	0.17278	0.077638	0.095226	0.53456	0.077744	0.16247	0.077863	0.18882	0.69089	0.10276	0.31172	0.076761	0.29411	0.07522	0.17391	0.17729	0.10772	0.19757	0.27224	0.10695	0.078694
708	0.19337	0.18144	0.15358	0.12665	0.071545	0.37394	0.1173	0.15152	0.092414	0.15369	0.68738	0.12628	0.074055	0.083283	0.19167	0.12524	0.94101	0.11948	0.5847	0.41036	0.3257	0.43231	0.34601	0.17241	0.91017	0.2075	0.12781	0.30979	0.17755	0.074101	0.097634	0.47898	0.07965	0.16657	0.074231	0.15483	0.81739	0.10499	0.34265	0.078594	0.32001	0.0769	0.17876	0.1824	0.11043	0.20458	0.29243	0.10925	0.080658
709	0.19988	0.18685	0.15719	0.10712	0.071719	0.32277	0.11976	0.15504	0.094763	0.15731	0.62812	0.12894	0.075579	0.085432	0.1571	0.12787	0.90073	0.12198	0.52775	0.35796	0.36065	0.37927	0.29601	0.17713	0.94784	0.21562	0.1305	0.26176	0.18265	0.07219	0.10009	0.42469	0.081665	0.1709	0.072251	0.12799	0.91261	0.10725	0.38303	0.080555	0.3532	0.078749	0.18395	0.18789	0.11322	0.21234	0.3176	0.11158	0.082717
710	0.20703	0.19269	0.16096	0.093338	0.07248	0.27385	0.12226	0.15871	0.097155	0.16109	0.57006	0.13165	0.077314	0.087637	0.12969	0.13055	0.8476	0.12453	0.47211	0.30732	0.40673	0.32779	0.24882	0.18216	0.9318	0.22474	0.13325	0.21747	0.18812	0.071447	0.10259	0.37174	0.083763	0.17549	0.07146	0.10806	0.94562	0.10953	0.43686	0.082612	0.39677	0.080722	0.18954	0.19382	0.1161	0.22102	0.34972	0.11393	0.084849
711	0.21495	0.19904	0.16492	0.083984	0.073664	0.22834	0.12481	0.16254	0.099591	0.16505	0.51329	0.13443	0.079203	0.089888	0.10926	0.1333	0.78919	0.12713	0.41775	0.25924	0.46853	0.2785	0.20582	0.18756	0.8891	0.23511	0.13608	0.17854	0.19403	0.071548	0.10515	0.32043	0.085925	0.18036	0.071525	0.093967	0.92725	0.11184	0.50932	0.084742	0.45503	0.082787	0.19558	0.20027	0.11908	0.23082	0.39169	0.11632	0.087039
712	0.22383	0.20599	0.16907	0.077886	0.075153	0.18781	0.1274	0.16656	0.10207	0.16921	0.45779	0.13727	0.081204	0.092182	0.094776	0.13611	0.72921	0.12978	0.36476	0.21505	0.55135	0.2325	0.16865	0.19338	0.83509	0.24706	0.13897	0.14636	0.20046	0.072256	0.10776	0.27145	0.08814	0.18558	0.072207	0.084387	0.88373	0.11418	0.60506	0.086929	0.53327	0.084922	0.20217	0.20735	0.12217	0.24206	0.44757	0.11874	0.089277
713	0.23387	0.21367	0.17346	0.074138	0.076862	0.15377	0.13005	0.1708	0.10461	0.17361	0.40357	0.14019	0.083289	0.094516	0.084907	0.139	0.6693	0.13249	0.3135	0.17637	0.65764	0.19135	0.13851	0.1997	0.77648	0.26104	0.14195	0.12147	0.20751	0.073401	0.11044	0.226	0.090398	0.19119	0.073334	0.078126	0.82945	0.11656	0.72147	0.089164	0.63502	0.087113	0.2094	0.21518	0.12538	0.2551	0.52247	0.1212	0.091558
714	0.24539	0.22223	0.1781	0.072078	0.078729	0.12702	0.13276	0.17527	0.1072	0.17826	0.3508	0.1432	0.085438	0.09689	0.07844	0.14197	0.6102	0.13526	0.26475	0.14456	0.77717	0.15661	0.11562	0.20661	0.71656	0.27767	0.14502	0.1033	0.2153	0.074861	0.1132	0.18567	0.092698	0.19725	0.074781	0.074262	0.7708	0.11896	0.83665	0.09144	0.75359	0.08935	0.21742	0.22393	0.12873	0.27051	0.62028	0.1237	0.093878
715	0.25879	0.23187	0.18304	0.07123	0.080713	0.10724	0.13553	0.18001	0.10985	0.18321	0.29995	0.1463	0.087639	0.099305	0.074429	0.14502	0.55219	0.1381	0.21979	0.12007	0.87812	0.12915	0.099159	0.21423	0.65679	0.29783	0.14818	0.090632	0.22399	0.076549	0.11603	0.15196	0.095036	0.20386	0.076459	0.072119	0.71093	0.12141	0.91264	0.093756	0.8612	0.091628	0.2264	0.23381	0.13225	0.28902	0.73627	0.12625	0.096237
716	0.27464	0.24287	0.18833	0.071256	0.082783	0.093319	0.13836	0.18506	0.11257	0.18851	0.25194	0.14949	0.089884	0.10176	0.072182	0.14817	0.49539	0.14101	0.18023	0.10227	0.92677	0.10876	0.087805	0.22271	0.59784	0.32278	0.15145	0.082122	0.2338	0.0784	0.11895	0.12559	0.097413	0.21111	0.078304	0.071213	0.65124	0.12389	0.93048	0.09611	0.92148	0.093945	0.23655	0.2451	0.13595	0.31171	0.84612	0.12884	0.098636
717	0.29371	0.25558	0.19401	0.071909	0.084918	0.083882	0.14128	0.19047	0.11536	0.1942	0.20819	0.1528	0.092167	0.10427	0.071201	0.15142	0.43982	0.14401	0.14752	0.089901	0.92174	0.094351	0.080264	0.23224	0.53998	0.35433	0.15484	0.076643	0.24499	0.080371	0.12198	0.10619	0.09983	0.21913	0.08027	0.071196	0.59235	0.12641	0.90576	0.098503	0.92556	0.096299	0.2482	0.25819	0.13987	0.34013	0.91352	0.13148	0.10108
718	0.31712	0.2705	0.20015	0.073015	0.087105	0.077737	0.14427	0.1963	0.11824	0.20036	0.17034	0.15623	0.094488	0.10683	0.07113	0.15479	0.38556	0.14709	0.12221	0.081618	0.88543	0.084557	0.075485	0.24309	0.4833	0.39506	0.15835	0.073345	0.25795	0.08243	0.12512	0.092565	0.10229	0.2281	0.082324	0.071819	0.53454	0.12898	0.86033	0.10094	0.89376	0.098692	0.26173	0.2736	0.14403	0.37647	0.92463	0.13419	0.10356
719	0.34645	0.28831	0.20684	0.074446	0.089335	0.073961	0.14735	0.20261	0.12122	0.20706	0.13964	0.15979	0.096846	0.10945	0.071714	0.15829	0.33291	0.15028	0.10374	0.076307	0.8349	0.078154	0.072689	0.2556	0.42784	0.44855	0.16202	0.07161	0.27317	0.084555	0.12839	0.083361	0.1048	0.23824	0.084447	0.072903	0.47789	0.1316	0.8057	0.10342	0.84527	0.10113	0.2777	0.29206	0.14849	0.42384	0.89685	0.13695	0.1061
720	0.38398	0.30997	0.21417	0.076111	0.091604	0.071885	0.15052	0.2095	0.12431	0.21442	0.11632	0.1635	0.099242	0.11213	0.07277	0.16193	0.2825	0.15356	0.090865	0.07313	0.7781	0.074196	0.071315	0.27022	0.37373	0.51905	0.16584	0.070998	0.29137	0.086733	0.13181	0.077387	0.10736	0.24983	0.086622	0.074318	0.42247	0.13428	0.74729	0.10595	0.78935	0.10361	0.2969	0.3146	0.15329	0.48626	0.85033	0.13978	0.10869
721	0.43282	0.33683	0.22229	0.077943	0.093908	0.071028	0.15381	0.21707	0.12752	0.22256	0.09956	0.16737	0.10168	0.11488	0.074165	0.16572	0.2355	0.15697	0.08222	0.071483	0.719	0.071989	0.070962	0.28762	0.32134	0.60969	0.16983	0.071193	0.31353	0.088953	0.1354	0.073737	0.10998	0.26327	0.08884	0.075971	0.36842	0.13701	0.68778	0.10853	0.73053	0.10613	0.3204	0.34265	0.15851	0.56771	0.79537	0.14268	0.11134
722	0.49691	0.37082	0.23135	0.079898	0.096247	0.071047	0.15721	0.22547	0.13086	0.23166	0.08801	0.17142	0.10416	0.11771	0.075803	0.16969	0.19346	0.16051	0.076653	0.070935	0.65948	0.071038	0.071344	0.30867	0.27145	0.71657	0.17403	0.071969	0.34104	0.091211	0.13918	0.071751	0.11266	0.27908	0.091097	0.077795	0.31616	0.1398	0.62841	0.11117	0.67101	0.10871	0.34977	0.37829	0.16423	0.66835	0.73696	0.14566	0.11407
723	0.57976	0.41462	0.24157	0.081942	0.098622	0.071696	0.16073	0.23487	0.13437	0.24192	0.080342	0.17569	0.10669	0.12063	0.077616	0.17385	0.15798	0.16419	0.073297	0.071176	0.60041	0.07099	0.072254	0.33464	0.22533	0.82015	0.17845	0.073162	0.37588	0.093504	0.14319	0.070959	0.11541	0.29802	0.093388	0.079743	0.26652	0.14266	0.56976	0.11388	0.61181	0.11136	0.38717	0.42437	0.17056	0.7763	0.67756	0.14873	0.11686
724	0.68033	0.47174	0.25324	0.084053	0.10104	0.072797	0.1644	0.24552	0.13805	0.25365	0.075479	0.18018	0.10927	0.12364	0.079555	0.17823	0.12997	0.16802	0.071522	0.071984	0.54219	0.07159	0.073543	0.36732	0.1846	0.88941	0.18313	0.074654	0.42078	0.095831	0.14746	0.071026	0.11824	0.3211	0.095713	0.081781	0.22081	0.1456	0.51209	0.11666	0.55341	0.11406	0.43559	0.48449	0.17765	0.86373	0.61832	0.15188	0.11974
725	0.78507	0.54583	0.26674	0.086215	0.10349	0.074224	0.16822	0.25773	0.14194	0.26722	0.072627	0.18493	0.11192	0.12678	0.081587	0.18286	0.10921	0.17204	0.070882	0.073201	0.48501	0.072657	0.075104	0.40916	0.15076	0.90783	0.18809	0.076362	0.47922	0.098194	0.15203	0.071708	0.12116	0.34977	0.098073	0.083887	0.1807	0.14862	0.45552	0.11953	0.49601	0.11684	0.49867	0.56219	0.18571	0.90445	0.5598	0.15514	0.12272
726	0.86609	0.63814	0.2826	0.08842	0.10599	0.075884	0.17222	0.2719	0.14607	0.28315	0.071215	0.18999	0.11463	0.13003	0.083687	0.18776	0.09457	0.17625	0.071058	0.07471	0.42898	0.074059	0.076861	0.46341	0.12448	0.88643	0.19338	0.078224	0.55468	0.10059	0.15696	0.072834	0.12418	0.38606	0.10047	0.086045	0.14763	0.15172	0.40018	0.12248	0.43974	0.11971	0.57954	0.65759	0.195	0.89825	0.50223	0.15851	0.1258
727	0.90041	0.74108	0.3015	0.09066	0.10854	0.077712	0.17641	0.28861	0.15048	0.30217	0.070836	0.19538	0.11741	0.13344	0.085839	0.19298	0.084635	0.18068	0.071819	0.076429	0.37429	0.075701	0.078759	0.53355	0.10526	0.84399	0.19905	0.080198	0.64774	0.10303	0.16233	0.074278	0.12731	0.4327	0.10291	0.088245	0.12212	0.15491	0.34637	0.12555	0.38475	0.12266	0.67692	0.76056	0.20594	0.86337	0.44576	0.16201	0.129
728	0.89058	0.83254	0.32445	0.092934	0.11115	0.07966	0.18082	0.30863	0.15522	0.32527	0.071199	0.20116	0.12027	0.137	0.088034	0.19857	0.078148	0.18536	0.073001	0.078298	0.32136	0.077515	0.080758	0.62125	0.091848	0.79161	0.20516	0.082254	0.74956	0.10551	0.16823	0.07595	0.13057	0.49303	0.10539	0.090481	0.10358	0.15821	0.29468	0.12872	0.33142	0.12572	0.77794	0.84655	0.21909	0.81462	0.39055	0.16563	0.13234
729	0.85431	0.88576	0.3528	0.095239	0.11382	0.081697	0.18547	0.33304	0.16036	0.35381	0.072095	0.2074	0.12323	0.14075	0.090265	0.20458	0.074138	0.19032	0.074485	0.080277	0.27102	0.079453	0.082832	0.72091	0.082828	0.73469	0.21177	0.084371	0.83723	0.10804	0.17476	0.077785	0.13397	0.56997	0.10791	0.09275	0.090695	0.16162	0.24621	0.13203	0.28048	0.12889	0.85668	0.89066	0.23532	0.75934	0.33694	0.16941	0.13583
730	0.80512	0.89253	0.38842	0.097577	0.11655	0.083798	0.19039	0.36333	0.16596	0.38971	0.073373	0.21418	0.12629	0.14472	0.092529	0.21108	0.071899	0.1956	0.076185	0.082335	0.22459	0.081481	0.084963	0.81364	0.077004	0.67607	0.219	0.086536	0.88553	0.11063	0.1821	0.079739	0.13754	0.66271	0.11049	0.09505	0.082069	0.16516	0.20248	0.1355	0.23317	0.1322	0.89152	0.8896	0.256	0.7013	0.28563	0.17334	0.13949
731	0.7498	0.86586	0.43381	0.099948	0.11937	0.08595	0.19563	0.40154	0.17214	0.43546	0.074926	0.22157	0.12947	0.14894	0.094823	0.21816	0.070928	0.20125	0.07804	0.084453	0.18373	0.083577	0.087138	0.87345	0.073469	0.61718	0.22693	0.088739	0.88854	0.11327	0.19045	0.081778	0.14129	0.76053	0.11313	0.097383	0.07653	0.16882	0.16516	0.13913	0.19109	0.13565	0.88357	0.85849	0.28329	0.64245	0.23781	0.17746	0.14336
732	0.69188	0.82166	0.49194	0.10236	0.12226	0.088142	0.20123	0.45029	0.17902	0.49404	0.076674	0.22972	0.13277	0.15345	0.097149	0.22592	0.070866	0.20732	0.080007	0.086617	0.14992	0.085723	0.08935	0.88801	0.07157	0.5587	0.23572	0.090976	0.86001	0.11598	0.2001	0.083881	0.14525	0.84045	0.11584	0.099748	0.073199	0.17264	0.13535	0.14295	0.15584	0.13928	0.84896	0.81212	0.32084	0.58376	0.19508	0.18178	0.14746
733	0.6332	0.76893	0.56532	0.1048	0.12526	0.090368	0.20725	0.51252	0.18678	0.56792	0.078564	0.23876	0.13623	0.1583	0.099508	0.2345	0.071456	0.21389	0.082055	0.088819	0.12377	0.08791	0.091595	0.86685	0.070843	0.50099	0.24556	0.093244	0.81507	0.11876	0.21149	0.086032	0.14946	0.88045	0.11861	0.10215	0.071446	0.17662	0.11304	0.14701	0.12822	0.1431	0.80099	0.75833	0.37488	0.52569	0.15906	0.18633	0.15183
734	0.57467	0.71224	0.6533	0.1073	0.12836	0.092625	0.21374	0.59017	0.19567	0.65626	0.080555	0.24889	0.13985	0.16356	0.1019	0.24406	0.072514	0.22103	0.084163	0.091054	0.10474	0.090131	0.093869	0.8259	0.070955	0.44425	0.25666	0.095542	0.76209	0.12162	0.22521	0.088223	0.15396	0.87808	0.12147	0.10459	0.070823	0.18078	0.097203	0.15132	0.10791	0.14714	0.74652	0.70119	0.4559	0.4685	0.13068	0.19113	0.15652
735	0.51673	0.65401	0.74641	0.10984	0.13158	0.094912	0.22079	0.6805	0.20602	0.74924	0.08262	0.26036	0.14367	0.16931	0.10433	0.25482	0.073909	0.22886	0.086319	0.093319	0.091487	0.092383	0.096174	0.77486	0.071672	0.38872	0.26935	0.097871	0.70533	0.12457	0.24219	0.090447	0.1588	0.84775	0.12441	0.10707	0.071012	0.18514	0.086393	0.15594	0.093659	0.15144	0.68913	0.64283	0.57986	0.4124	0.10967	0.19621	0.16158
736	0.45966	0.59551	0.82403	0.11243	0.13493	0.097229	0.2285	0.77075	0.21832	0.82596	0.084741	0.27349	0.14771	0.17565	0.10681	0.26706	0.075543	0.2375	0.088512	0.095613	0.082603	0.094664	0.098509	0.71905	0.072821	0.33481	0.28402	0.10023	0.64716	0.12762	0.26385	0.092702	0.16404	0.80218	0.12746	0.1096	0.071782	0.18973	0.079288	0.16092	0.084037	0.15604	0.63077	0.58436	0.75761	0.3577	0.09487	0.20162	0.16709
737	0.40369	0.53738	0.86553	0.11508	0.13844	0.099577	0.237	0.8387	0.23328	0.86615	0.086905	0.28871	0.152	0.18273	0.10933	0.28116	0.07735	0.24711	0.090737	0.097937	0.076886	0.096975	0.10088	0.66128	0.07428	0.2833	0.30121	0.10263	0.58875	0.13079	0.29247	0.094985	0.16976	0.74905	0.13062	0.11219	0.07297	0.19456	0.074845	0.16633	0.07779	0.161	0.5724	0.52635	0.94846	0.30502	0.084848	0.20741	0.17314
738	0.3492	0.47997	0.86749	0.1178	0.14212	0.10196	0.24644	0.86793	0.25199	0.86699	0.089104	0.30659	0.1566	0.19074	0.1119	0.2976	0.079279	0.25792	0.092991	0.10029	0.073435	0.099316	0.10328	0.60295	0.07596	0.23544	0.32165	0.10506	0.53072	0.13408	0.33188	0.097298	0.17607	0.69245	0.13391	0.11483	0.074457	0.19968	0.072302	0.17226	0.07396	0.16639	0.51454	0.46911	1.0496	0.2554	0.078316	0.21362	0.17986
739	0.29686	0.42353	0.84097	0.12059	0.14601	0.10438	0.25701	0.86025	0.27614	0.83979	0.091335	0.32788	0.16155	0.19992	0.11453	0.31703	0.081297	0.27019	0.095274	0.10268	0.071599	0.10169	0.10572	0.54484	0.077798	0.19287	0.34629	0.10754	0.47341	0.13752	0.38846	0.099642	0.18311	0.63451	0.13733	0.11753	0.076156	0.20512	0.071115	0.17882	0.071854	0.17228	0.45748	0.41288	1.0437	0.21033	0.074282	0.22032	0.18739
740	0.2478	0.36838	0.79812	0.12347	0.15012	0.10684	0.26898	0.82814	0.30849	0.79658	0.093593	0.35363	0.16692	0.21063	0.11722	0.34032	0.08338	0.28427	0.097586	0.10511	0.070919	0.1041	0.10821	0.48733	0.07975	0.15719	0.37645	0.11006	0.41709	0.14112	0.47285	0.10202	0.19104	0.57633	0.14093	0.12031	0.078008	0.21093	0.0709	0.18617	0.070981	0.1788	0.40149	0.35804	0.99707	0.17154	0.072031	0.2276	0.19597
741	0.2036	0.3151	0.7468	0.12643	0.1545	0.10934	0.28268	0.78241	0.35365	0.74507	0.09588	0.38518	0.1728	0.22339	0.11998	0.36865	0.085513	0.30064	0.099928	0.10758	0.071067	0.10655	0.11074	0.43072	0.081784	0.12924	0.4138	0.11263	0.3621	0.14491	0.59994	0.10443	0.20013	0.5185	0.1447	0.12317	0.07997	0.21715	0.071381	0.1945	0.07099	0.18609	0.34698	0.30521	0.93809	0.14025	0.071055	0.23556	0.20589
742	0.16595	0.26466	0.69138	0.12949	0.15919	0.11189	0.29854	0.72974	0.41928	0.68958	0.098195	0.42425	0.17928	0.23894	0.12281	0.40353	0.087684	0.3199	0.1023	0.11009	0.071808	0.10904	0.11332	0.37533	0.083879	0.10866	0.46035	0.11526	0.30906	0.14891	0.7759	0.10688	0.21072	0.46138	0.1487	0.12611	0.08201	0.22385	0.072361	0.20409	0.071632	0.19435	0.29467	0.25547	0.87647	0.11664	0.070991	0.24431	0.21757
743	0.13593	0.21851	0.6342	0.13267	0.16425	0.1145	0.31713	0.67377	0.51758	0.63236	0.10054	0.47286	0.18653	0.25843	0.12574	0.44682	0.089888	0.34289	0.10471	0.11266	0.072974	0.11158	0.11596	0.32171	0.086019	0.094239	0.51809	0.11795	0.25902	0.15316	0.95367	0.10938	0.22329	0.40526	0.15293	0.12916	0.084109	0.2311	0.073697	0.21533	0.072727	0.20383	0.24572	0.21033	0.81548	0.099763	0.07158	0.25402	0.23163
744	0.11351	0.17837	0.57648	0.13598	0.16975	0.11716	0.3392	0.61643	0.66246	0.57464	0.10292	0.53277	0.19473	0.28363	0.12876	0.50047	0.09212	0.37066	0.10716	0.11528	0.074444	0.11418	0.11867	0.27079	0.088196	0.084507	0.58779	0.12071	0.21348	0.1577	1.04	0.11192	0.23856	0.35056	0.15745	0.13231	0.086252	0.23901	0.075289	0.22878	0.074146	0.21494	0.20175	0.17152	0.75617	0.088199	0.072636	0.26489	0.24898
745	0.097614	0.14562	0.51892	0.13943	0.17577	0.11989	0.36574	0.55877	0.84624	0.51709	0.10533	0.60411	0.20413	0.31742	0.13189	0.56567	0.094378	0.4046	0.10965	0.11796	0.07613	0.11683	0.12144	0.22398	0.090403	0.07819	0.66638	0.12355	0.17414	0.16257	1.0307	0.11452	0.25761	0.29801	0.1623	0.13559	0.088431	0.24767	0.077062	0.24526	0.075796	0.22819	0.16443	0.14026	0.69895	0.08056	0.074028	0.27715	0.27103
746	0.08679	0.12063	0.46193	0.14304	0.18243	0.1227	0.39801	0.50139	0.99534	0.46012	0.10778	0.6825	0.21511	0.36456	0.13513	0.6408	0.096664	0.44636	0.11219	0.1207	0.077971	0.11955	0.1243	0.18299	0.092638	0.074315	0.74369	0.12648	0.14231	0.16785	0.98371	0.11717	0.28214	0.24874	0.16755	0.13901	0.09064	0.25723	0.078965	0.26604	0.077611	0.24439	0.13479	0.11669	0.64395	0.075743	0.075658	0.29113	0.30001
747	0.079689	0.10262	0.40585	0.14684	0.18988	0.12559	0.43756	0.44466	1.0375	0.40408	0.11028	0.7563	0.22818	0.43288	0.13852	0.71822	0.098977	0.49764	0.11478	0.12353	0.079922	0.12233	0.12724	0.14929	0.094899	0.072182	0.80331	0.1295	0.11821	0.17359	0.92434	0.11989	0.31484	0.20438	0.17327	0.14259	0.092876	0.26788	0.080962	0.29309	0.079544	0.26475	0.11273	0.099863	0.59109	0.072939	0.077459	0.30723	0.33955
748	0.075259	0.090201	0.35113	0.15086	0.19833	0.12857	0.486	0.38894	1.0108	0.34942	0.11282	0.80929	0.24412	0.53434	0.14206	0.78345	0.10132	0.55942	0.11743	0.12644	0.081954	0.1252	0.13028	0.12338	0.097187	0.071291	0.83227	0.13263	0.10094	0.17992	0.86279	0.12268	0.36014	0.16659	0.17956	0.14635	0.095138	0.27981	0.083026	0.32963	0.081562	0.29116	0.097126	0.08834	0.54016	0.071569	0.079381	0.326	0.39567
749	0.072731	0.081945	0.29854	0.15511	0.20804	0.13165	0.54447	0.33479	0.95786	0.29691	0.11542	0.831	0.26406	0.68101	0.14577	0.82181	0.10369	0.63022	0.12015	0.12944	0.084043	0.12816	0.13343	0.1046	0.099501	0.071289	0.82988	0.13587	0.089089	0.18695	0.80165	0.12556	0.42533	0.13649	0.18654	0.15031	0.097426	0.29333	0.08514	0.38091	0.083641	0.32666	0.086525	0.080737	0.49091	0.071224	0.081391	0.34812	0.47802
750	0.071559	0.076692	0.24924	0.15965	0.2194	0.13484	0.61215	0.28305	0.89742	0.24774	0.11808	0.82311	0.28982	0.85943	0.14968	0.82866	0.1061	0.70348	0.12293	0.13254	0.086177	0.13122	0.1367	0.091584	0.10185	0.071923	0.80417	0.13926	0.081247	0.19485	0.74214	0.12852	0.52162	0.11401	0.19439	0.15451	0.099741	0.30876	0.087294	0.45549	0.085767	0.37626	0.07959	0.075951	0.44303	0.071612	0.083464	0.37445	0.5995
751	0.071356	0.07358	0.20484	0.16452	0.23296	0.13816	0.68397	0.23507	0.83593	0.20352	0.1208	0.79406	0.32426	0.99548	0.15381	0.80978	0.10855	0.7667	0.1258	0.13576	0.088346	0.13438	0.14011	0.082902	0.10422	0.073011	0.76392	0.14279	0.076291	0.20386	0.68461	0.13158	0.66103	0.098072	0.20333	0.15899	0.10209	0.32657	0.089479	0.5656	0.087929	0.44808	0.075281	0.073171	0.39627	0.072525	0.085584	0.40607	0.76452
752	0.071846	0.071992	0.16703	0.16979	0.24953	0.14163	0.74913	0.19253	0.77528	0.16595	0.12359	0.75204	0.37207	1.0297	0.15821	0.77392	0.11104	0.80649	0.12875	0.13912	0.090543	0.13768	0.14368	0.077346	0.10663	0.074424	0.71543	0.1465	0.073391	0.21429	0.62918	0.13475	0.83495	0.08723	0.21367	0.16378	0.10446	0.34731	0.091691	0.71977	0.090122	0.55387	0.07284	0.071819	0.35049	0.073813	0.087742	0.44422	0.93213
753	0.072831	0.071491	0.13691	0.17552	0.27032	0.14526	0.79435	0.15701	0.71635	0.13607	0.12646	0.70271	0.44083	0.99833	0.16292	0.72811	0.11358	0.81697	0.1318	0.14262	0.092767	0.14111	0.14742	0.074018	0.10908	0.076068	0.66252	0.1504	0.071953	0.22658	0.57576	0.13805	0.9789	0.080124	0.22584	0.16895	0.10687	0.37169	0.093928	0.89256	0.09234	0.70316	0.07173	0.071487	0.30579	0.075368	0.08993	0.49007	1.0204
754	0.074169	0.071768	0.11441	0.1818	0.29724	0.14907	0.81169	0.12929	0.65941	0.11381	0.12942	0.64946	0.54165	0.94568	0.16798	0.67678	0.11617	0.80203	0.13496	0.14628	0.095016	0.14469	0.15136	0.072277	0.11158	0.077877	0.60739	0.15453	0.07156	0.24139	0.52415	0.14148	1.0258	0.075695	0.24049	0.17456	0.10932	0.40056	0.09619	1.0057	0.094584	0.87551	0.071572	0.071885	0.26269	0.077113	0.092144	0.54422	1.0164
755	0.07576	0.072601	0.098477	0.18877	0.3333	0.15309	0.80273	0.10896	0.60449	0.098061	0.13247	0.59425	0.68453	0.88559	0.17347	0.62256	0.11881	0.7695	0.13825	0.15014	0.097289	0.14846	0.15553	0.071667	0.11412	0.079803	0.5513	0.15891	0.071914	0.25967	0.47409	0.14507	1.0004	0.073169	0.25853	0.18071	0.11182	0.43486	0.098477	1.0208	0.096852	0.99689	0.072093	0.072804	0.22212	0.078994	0.094383	0.6055	0.97244
756	0.077531	0.073831	0.087639	0.19659	0.38339	0.15736	0.7745	0.094744	0.55146	0.087362	0.13564	0.53824	0.85449	0.82418	0.17946	0.56697	0.12152	0.7262	0.14166	0.15421	0.099588	0.15243	0.15996	0.071866	0.11671	0.081813	0.49503	0.1636	0.072802	0.28287	0.42532	0.14885	0.94984	0.072001	0.2814	0.18751	0.11436	0.47552	0.10079	0.98335	0.099145	1.0205	0.073101	0.074096	0.18547	0.080971	0.096646	0.6694	0.91546
757	0.079428	0.075343	0.080539	0.20546	0.45526	0.1619	0.73404	0.085187	0.50011	0.080362	0.13893	0.48213	0.98368	0.76358	0.18606	0.51093	0.1243	0.67669	0.14524	0.15853	0.10191	0.15663	0.1647	0.072643	0.11936	0.083884	0.4391	0.16864	0.074071	0.31328	0.37766	0.15282	0.89051	0.0718	0.31131	0.19511	0.11695	0.52304	0.10313	0.92875	0.10147	0.9863	0.074455	0.075652	0.15412	0.083018	0.098935	0.72723	0.85439
758	0.081417	0.077057	0.076117	0.2157	0.55973	0.16678	0.68635	0.079009	0.45018	0.076012	0.14236	0.42643	1.0179	0.70456	0.19342	0.45502	0.12716	0.62378	0.14899	0.16314	0.10427	0.1611	0.16981	0.073832	0.12207	0.086001	0.38399	0.17409	0.075611	0.35455	0.33108	0.15703	0.82917	0.072292	0.35182	0.2037	0.1196	0.57679	0.10551	0.86826	0.10382	0.93294	0.076056	0.077398	0.12894	0.085116	0.10125	0.76846	0.79323
759	0.083473	0.078915	0.073599	0.22769	0.70445	0.17203	0.63459	0.075243	0.40144	0.073545	0.14594	0.37166	0.98802	0.64742	0.20171	0.39975	0.1301	0.56913	0.15293	0.16809	0.10666	0.16588	0.17534	0.075316	0.12485	0.088153	0.33036	0.18004	0.077345	0.41251	0.28592	0.1615	0.76839	0.073277	0.4086	0.21357	0.12231	0.63392	0.10792	0.80698	0.1062	0.87285	0.077833	0.079277	0.10989	0.087254	0.10359	0.78623	0.73327
760	0.085577	0.080874	0.072437	0.24205	0.86866	0.17773	0.58066	0.073193	0.3538	0.072418	0.1497	0.31855	0.93622	0.59218	0.21117	0.34571	0.13314	0.51376	0.15711	0.17343	0.10908	0.17103	0.18138	0.077009	0.12771	0.090334	0.27919	0.18658	0.079216	0.49606	0.24292	0.16629	0.70906	0.074616	0.49037	0.22508	0.12509	0.68847	0.11036	0.74662	0.10862	0.81157	0.079735	0.081252	0.096178	0.089422	0.10597	0.78067	0.67503
761	0.087718	0.082907	0.072242	0.25961	0.98473	0.18399	0.52571	0.072364	0.30742	0.072249	0.15365	0.26816	0.8768	0.53873	0.22216	0.29378	0.13628	0.45833	0.16155	0.17923	0.11155	0.17661	0.18803	0.078851	0.13066	0.09254	0.23187	0.19385	0.081185	0.61568	0.20333	0.17145	0.65152	0.076205	0.60767	0.23878	0.12795	0.73219	0.11285	0.68786	0.11107	0.75106	0.081726	0.083297	0.086711	0.091618	0.10838	0.75679	0.61867
762	0.089889	0.084993	0.072736	0.28169	1.0092	0.1909	0.4705	0.072406	0.26286	0.072762	0.15783	0.22199	0.81553	0.48686	0.23514	0.24525	0.13954	0.40338	0.16629	0.18561	0.11406	0.18271	0.19544	0.080798	0.1337	0.09477	0.19012	0.20203	0.083224	0.77117	0.16861	0.17703	0.59586	0.077972	0.76162	0.25542	0.1309	0.75778	0.11539	0.63093	0.11357	0.69207	0.083782	0.085392	0.080445	0.093837	0.11083	0.72043	0.56415
763	0.092086	0.08712	0.073724	0.31027	0.97653	0.19862	0.41559	0.07307	0.22115	0.073763	0.16228	0.18176	0.75485	0.43634	0.25079	0.20177	0.14294	0.34953	0.17138	0.19267	0.11662	0.18943	0.20378	0.082822	0.13684	0.097023	0.15547	0.21135	0.085315	0.92193	0.13997	0.18314	0.54196	0.079866	0.91456	0.27618	0.13394	0.7625	0.11797	0.57584	0.11612	0.63488	0.085885	0.087526	0.076529	0.096079	0.11332	0.6762	0.5113
764	0.094307	0.08928	0.075063	0.3485	0.92439	0.20735	0.3616	0.074179	0.18374	0.075111	0.16703	0.14887	0.69557	0.38701	0.27014	0.16498	0.14648	0.29767	0.1769	0.20057	0.11923	0.19691	0.2133	0.084901	0.14011	0.0993	0.12857	0.22212	0.087445	0.99982	0.11779	0.18986	0.48964	0.081851	0.99779	0.30281	0.13708	0.74849	0.12062	0.52244	0.11872	0.57951	0.088025	0.08969	0.074326	0.098345	0.11585	0.62724	0.4599
765	0.09655	0.091465	0.076651	0.40133	0.86496	0.21737	0.30932	0.075604	0.15204	0.076706	0.17213	0.1237	0.63802	0.33886	0.29472	0.13586	0.15019	0.24905	0.18291	0.20953	0.12189	0.20534	0.22433	0.087022	0.1435	0.1016	0.10892	0.2348	0.089607	0.99533	0.10154	0.19735	0.43869	0.083901	0.99696	0.33807	0.14034	0.72028	0.12332	0.47054	0.12137	0.52583	0.090195	0.091881	0.073363	0.10064	0.11844	0.57555	0.40975
766	0.098817	0.093675	0.078418	0.47629	0.80383	0.22905	0.25995	0.077253	0.12684	0.078477	0.17765	0.10554	0.58225	0.29222	0.32689	0.11423	0.15409	0.20532	0.18952	0.21983	0.12463	0.21497	0.23735	0.089175	0.14705	0.10393	0.095241	0.25002	0.091795	0.95282	0.090146	0.20578	0.38893	0.086	0.95569	0.38632	0.14374	0.68233	0.12609	0.41993	0.12409	0.47366	0.092389	0.094095	0.0733	0.10295	0.12108	0.52238	0.36077
767	0.10111	0.095907	0.08031	0.58287	0.74324	0.24292	0.21504	0.079063	0.10797	0.080372	0.18366	0.093007	0.52817	0.24783	0.3704	0.098979	0.1582	0.16813	0.19686	0.23188	0.12743	0.22613	0.25302	0.091355	0.15076	0.10629	0.086076	0.26872	0.094006	0.89716	0.082469	0.21541	0.34039	0.088135	0.90051	0.45426	0.14728	0.63808	0.12894	0.37051	0.12688	0.42279	0.094607	0.096332	0.073889	0.1053	0.12379	0.46859	0.31313
768	0.10343	0.098162	0.082292	0.72458	0.68398	0.25974	0.1763	0.080985	0.094505	0.082357	0.19027	0.084684	0.47559	0.20694	0.43104	0.088649	0.16257	0.13851	0.20511	0.24624	0.13031	0.23931	0.27234	0.093559	0.15466	0.10868	0.080186	0.29231	0.096239	0.83675	0.077538	0.22657	0.29337	0.0903	0.84023	0.55098	0.15099	0.58989	0.13187	0.32238	0.12975	0.37312	0.096848	0.098591	0.074953	0.10767	0.12656	0.41483	0.26739
769	0.10577	0.10044	0.084339	0.87577	0.62638	0.28066	0.14497	0.082989	0.085286	0.084406	0.19761	0.079394	0.42432	0.17108	0.51712	0.081919	0.16722	0.1164	0.21449	0.26372	0.13328	0.25517	0.29678	0.095786	0.15877	0.11111	0.07663	0.32294	0.098496	0.77573	0.074602	0.23973	0.24865	0.09249	0.7792	0.6831	0.15488	0.53935	0.13489	0.27603	0.1327	0.32474	0.099111	0.10087	0.07636	0.11009	0.12941	0.36178	0.22458
770	0.10815	0.10274	0.086434	0.97392	0.57047	0.30738	0.12123	0.085052	0.079229	0.086502	0.20585	0.076265	0.37426	0.1415	0.63701	0.077768	0.1722	0.10075	0.22532	0.28554	0.13635	0.27474	0.32865	0.098035	0.16313	0.11358	0.074732	0.36399	0.10078	0.71556	0.073113	0.25556	0.20748	0.094703	0.71895	0.83564	0.15899	0.4875	0.13802	0.23241	0.13574	0.27813	0.1014	0.10318	0.078018	0.11254	0.13234	0.3103	0.18617
771	0.11056	0.10508	0.088566	0.98998	0.51617	0.34255	0.10422	0.087159	0.075483	0.088635	0.21521	0.074673	0.32553	0.11861	0.78559	0.075449	0.17757	0.090104	0.23803	0.31354	0.13952	0.2995	0.37149	0.10031	0.16778	0.11609	0.074015	0.42066	0.10308	0.65683	0.072671	0.27507	0.17138	0.096938	0.66013	0.95319	0.16334	0.43515	0.14126	0.19294	0.13889	0.23424	0.10371	0.10552	0.079859	0.11503	0.13536	0.26156	0.15362
772	0.11301	0.10744	0.090727	0.95681	0.46331	0.39031	0.092562	0.0893	0.073409	0.090797	0.22599	0.074173	0.2786	0.10186	0.92036	0.074432	0.1834	0.083152	0.25324	0.35059	0.14282	0.33176	0.43078	0.1026	0.17275	0.11865	0.074138	0.50052	0.10541	0.59974	0.072986	0.29973	0.14162	0.099196	0.60294	0.99	0.16798	0.38299	0.14462	0.15913	0.14216	0.19446	0.10605	0.10789	0.081836	0.11756	0.13849	0.21714	0.12775
773	0.1155	0.10983	0.092913	0.90466	0.41172	0.45688	0.084869	0.091468	0.072545	0.092984	0.23864	0.07445	0.23444	0.090133	0.98385	0.074342	0.18977	0.078843	0.27186	0.4011	0.14624	0.3751	0.51429	0.10493	0.17811	0.12127	0.074859	0.61186	0.10778	0.54428	0.07385	0.33182	0.11862	0.10148	0.54738	0.96663	0.17294	0.33181	0.14813	0.13195	0.14555	0.16032	0.10843	0.11029	0.083917	0.12015	0.14173	0.17871	0.10839
774	0.11804	0.11226	0.095122	0.84559	0.36139	0.55046	0.080032	0.093661	0.072554	0.095193	0.25375	0.075281	0.19446	0.08224	0.97579	0.074911	0.19681	0.076414	0.29521	0.47163	0.14981	0.43496	0.62979	0.10728	0.18392	0.12394	0.076007	0.75361	0.11017	0.49032	0.075111	0.37484	0.1018	0.10378	0.49334	0.9183	0.17828	0.28269	0.15179	0.11142	0.14909	0.13282	0.11083	0.11273	0.086077	0.12279	0.14509	0.1475	0.094605
775	0.12063	0.11473	0.097352	0.78477	0.31253	0.6767	0.077229	0.095876	0.073197	0.097424	0.2722	0.076507	0.16018	0.077168	0.93344	0.075949	0.20467	0.075319	0.32534	0.57039	0.15355	0.51897	0.77308	0.10967	0.19027	0.12667	0.077456	0.89255	0.11261	0.43772	0.07666	0.43415	0.090033	0.10612	0.44065	0.86056	0.18407	0.23701	0.15564	0.096686	0.15279	0.11202	0.11328	0.11521	0.088303	0.1255	0.14859	0.12375	0.085173
776	0.12328	0.11725	0.099605	0.72424	0.26579	0.82204	0.075868	0.098112	0.074298	0.099678	0.29528	0.078012	0.13262	0.07414	0.87802	0.077322	0.21352	0.075174	0.36534	0.70119	0.15748	0.63442	0.90612	0.11209	0.19728	0.12948	0.079121	0.97115	0.11508	0.38636	0.078418	0.51721	0.082121	0.10848	0.38923	0.8	0.1904	0.19643	0.15968	0.086541	0.15668	0.09708	0.11576	0.11773	0.090584	0.12827	0.15225	0.10667	0.078979
777	0.12598	0.11981	0.10188	0.66485	0.22228	0.93699	0.075534	0.10037	0.075729	0.10196	0.32495	0.079715	0.1118	0.072589	0.81807	0.078931	0.22365	0.075704	0.42	0.84461	0.16162	0.77607	0.97378	0.11455	0.20509	0.13236	0.080939	0.9754	0.1176	0.33637	0.080331	0.63118	0.077039	0.11088	0.33914	0.73929	0.19737	0.16242	0.16396	0.079829	0.16077	0.08678	0.11829	0.1203	0.092916	0.13111	0.15609	0.094914	0.075143
778	0.12875	0.12242	0.10418	0.60693	0.18353	0.97758	0.07593	0.10265	0.077402	0.10426	0.36421	0.08156	0.096868	0.072103	0.75729	0.080709	0.23539	0.076714	0.49608	0.94786	0.16601	0.90569	0.97052	0.11705	0.21388	0.13532	0.082864	0.93854	0.12016	0.28816	0.082357	0.77141	0.074006	0.11331	0.29081	0.67952	0.20513	0.13571	0.1685	0.075617	0.16511	0.079956	0.12087	0.12293	0.095296	0.13404	0.16013	0.087147	0.073008
779	0.1316	0.1251	0.10651	0.55054	0.151	0.9583	0.076844	0.10496	0.079249	0.10659	0.4176	0.083505	0.086585	0.072388	0.69712	0.082606	0.24926	0.078065	0.60101	0.97583	0.17067	0.97038	0.93074	0.1196	0.22392	0.13839	0.084868	0.88544	0.12278	0.24265	0.08447	0.90099	0.072452	0.11579	0.24511	0.62112	0.21386	0.11595	0.17335	0.073214	0.16971	0.075666	0.12351	0.12561	0.097724	0.13706	0.1644	0.082257	0.072102
780	0.13452	0.12783	0.10887	0.49561	0.1254	0.91224	0.078128	0.1073	0.081225	0.10895	0.49159	0.085523	0.079781	0.073229	0.6382	0.084589	0.26596	0.079659	0.73448	0.95029	0.17567	0.96617	0.87658	0.1222	0.23554	0.14155	0.086929	0.82634	0.12545	0.20122	0.086652	0.96747	0.071965	0.11831	0.2034	0.56423	0.22382	0.10206	0.17855	0.072114	0.17463	0.073207	0.1262	0.12836	0.1002	0.14017	0.16893	0.079418	0.072084
781	0.13754	0.13064	0.11126	0.44202	0.10644	0.85572	0.079672	0.10967	0.083298	0.11134	0.59338	0.087594	0.075508	0.074472	0.58074	0.086634	0.28652	0.081424	0.8693	0.90188	0.18104	0.92635	0.81719	0.12485	0.24922	0.14483	0.089032	0.7657	0.12819	0.16544	0.08889	0.96502	0.072249	0.12087	0.16727	0.50882	0.23532	0.092696	0.18417	0.071956	0.17991	0.072068	0.12896	0.13118	0.10273	0.14339	0.17376	0.078034	0.072705
782	0.14065	0.13352	0.11369	0.38971	0.09304	0.79567	0.081403	0.11207	0.085446	0.11376	0.72337	0.089705	0.073063	0.076006	0.52475	0.088725	0.31246	0.083312	0.9533	0.84451	0.18685	0.87232	0.75656	0.12757	0.26565	0.14824	0.091168	0.70535	0.131	0.13646	0.091177	0.92611	0.073089	0.12349	0.13789	0.45476	0.24885	0.086649	0.19028	0.072477	0.18562	0.071881	0.13179	0.13408	0.10532	0.14674	0.17894	0.077684	0.07379
783	0.14387	0.13648	0.11615	0.33882	0.083937	0.73508	0.083265	0.1145	0.087653	0.11623	0.85735	0.091847	0.071934	0.077751	0.47015	0.090852	0.34607	0.085288	0.96585	0.78429	0.1932	0.81306	0.69632	0.13035	0.28581	0.15179	0.093332	0.64607	0.13388	0.11443	0.093509	0.87255	0.074332	0.12617	0.11548	0.402	0.26507	0.082985	0.19698	0.073488	0.19185	0.072381	0.1347	0.13706	0.10797	0.15022	0.18453	0.078067	0.075209
784	0.14722	0.13954	0.11866	0.28979	0.078006	0.67516	0.085222	0.11698	0.089911	0.11874	0.94526	0.094016	0.071755	0.079649	0.41684	0.093007	0.39083	0.087327	0.934	0.72377	0.20018	0.7525	0.63719	0.13321	0.31114	0.1555	0.09552	0.58815	0.13685	0.098554	0.095885	0.81347	0.075864	0.12891	0.099296	0.3506	0.2849	0.081017	0.20439	0.074854	0.19868	0.073378	0.1377	0.14014	0.1107	0.15385	0.19061	0.078973	0.07687
785	0.15069	0.1427	0.12121	0.24358	0.074368	0.61646	0.087248	0.1195	0.092214	0.1213	0.96288	0.096208	0.072262	0.08166	0.36486	0.095188	0.45178	0.089413	0.88347	0.66403	0.20793	0.6923	0.57942	0.13615	0.34383	0.15939	0.097729	0.53166	0.13992	0.087591	0.098305	0.75297	0.077607	0.13172	0.088093	0.30094	0.30977	0.080253	0.21266	0.076476	0.20624	0.074733	0.14079	0.14332	0.1135	0.15765	0.19726	0.080248	0.078706
786	0.15432	0.14597	0.12382	0.20159	0.072383	0.55913	0.089324	0.12207	0.09456	0.1239	0.93357	0.098423	0.073263	0.083756	0.3145	0.097391	0.53541	0.091536	0.82561	0.60552	0.21662	0.63315	0.52306	0.13918	0.38711	0.16348	0.099961	0.47653	0.14308	0.080305	0.10077	0.69276	0.079503	0.1346	0.08063	0.25386	0.34174	0.080343	0.22202	0.078284	0.21472	0.076346	0.14399	0.14661	0.11638	0.16165	0.2046	0.081785	0.08067
787	0.15812	0.14937	0.12648	0.16542	0.071587	0.50319	0.091438	0.12469	0.096948	0.12657	0.88451	0.10066	0.07462	0.085918	0.26647	0.099616	0.64648	0.093688	0.76541	0.5484	0.2265	0.57534	0.46805	0.1423	0.44575	0.16781	0.10222	0.42271	0.14636	0.075692	0.10329	0.63356	0.081512	0.13757	0.075891	0.21067	0.38394	0.081038	0.23272	0.080226	0.22431	0.078147	0.1473	0.15004	0.11937	0.16586	0.2128	0.083509	0.08273
788	0.1621	0.15291	0.1292	0.1362	0.071648	0.44858	0.093584	0.12737	0.09938	0.12929	0.82736	0.10292	0.076235	0.088134	0.22195	0.10186	0.77696	0.095865	0.70508	0.49263	0.23787	0.51889	0.41433	0.14554	0.5259	0.17239	0.10449	0.37022	0.14976	0.073007	0.10586	0.57566	0.083604	0.14063	0.073114	0.17299	0.4409	0.082163	0.24517	0.082269	0.23533	0.080085	0.15074	0.15361	0.12247	0.17031	0.22204	0.085366	0.084863
789	0.1663	0.15661	0.13199	0.11407	0.072328	0.39525	0.095756	0.13011	0.10186	0.13208	0.76742	0.1052	0.078036	0.090396	0.18254	0.10413	0.89172	0.098066	0.64556	0.43817	0.25118	0.46377	0.36197	0.1489	0.63256	0.17729	0.1068	0.31933	0.1533	0.071709	0.1085	0.51911	0.085763	0.14379	0.071749	0.14211	0.51861	0.083594	0.25988	0.084388	0.24816	0.082123	0.15433	0.15733	0.1257	0.17505	0.2326	0.087318	0.087053
790	0.17074	0.16048	0.13486	0.098172	0.073453	0.34338	0.097951	0.13292	0.10439	0.13495	0.70715	0.10751	0.079973	0.092699	0.14968	0.10643	0.9485	0.10029	0.58723	0.38502	0.26702	0.40995	0.31131	0.15239	0.75978	0.18253	0.10913	0.27074	0.157	0.071408	0.11119	0.46389	0.087973	0.14707	0.071401	0.1184	0.62217	0.08524	0.2776	0.086566	0.26338	0.084238	0.15808	0.16124	0.12906	0.18012	0.24484	0.08934	0.089292
791	0.17546	0.16454	0.1378	0.087225	0.0749	0.29343	0.10017	0.1358	0.10697	0.1379	0.64755	0.10985	0.082009	0.095042	0.12403	0.10875	0.94398	0.10253	0.53023	0.33339	0.28626	0.35751	0.26311	0.15603	0.87665	0.18818	0.11149	0.22561	0.16087	0.071827	0.11397	0.40995	0.090229	0.15047	0.071786	0.1012	0.74709	0.087042	0.29941	0.088794	0.28178	0.086412	0.16201	0.16535	0.1326	0.18556	0.25927	0.091413	0.091573
792	0.1805	0.16883	0.14083	0.079966	0.076578	0.24636	0.10241	0.13877	0.10962	0.14093	0.58908	0.11222	0.084121	0.097425	0.10518	0.1111	0.90565	0.1048	0.47452	0.28385	0.31015	0.30684	0.21863	0.15983	0.94102	0.19431	0.11388	0.18552	0.16494	0.072764	0.11683	0.35741	0.092525	0.154	0.072699	0.089262	0.86544	0.088954	0.32687	0.091064	0.3045	0.088635	0.16615	0.16969	0.13632	0.19145	0.27658	0.093526	0.093893
793	0.18591	0.17338	0.14397	0.075383	0.078424	0.2036	0.10467	0.14183	0.11233	0.14407	0.53189	0.11462	0.086292	0.099849	0.091964	0.11349	0.8536	0.1071	0.4201	0.23745	0.34052	0.25876	0.17949	0.16383	0.94312	0.20102	0.11631	0.15197	0.16924	0.074075	0.11978	0.30665	0.094861	0.15769	0.073992	0.081277	0.93517	0.090947	0.36232	0.093373	0.33323	0.090901	0.17052	0.17429	0.14025	0.19786	0.29779	0.095671	0.096252
794	0.19176	0.17821	0.1472	0.072723	0.080392	0.16676	0.10696	0.14498	0.11512	0.14731	0.47597	0.11705	0.088511	0.10232	0.083037	0.1159	0.79568	0.10942	0.36705	0.1957	0.38007	0.21459	0.14708	0.16803	0.90801	0.20841	0.11878	0.12568	0.17378	0.075654	0.12283	0.2585	0.097235	0.16155	0.075558	0.076171	0.94252	0.092999	0.40913	0.095721	0.37044	0.093205	0.17515	0.17918	0.14445	0.2049	0.32438	0.097844	0.098652
795	0.19812	0.18338	0.15056	0.071444	0.082449	0.13701	0.10928	0.14825	0.11799	0.15067	0.42133	0.11953	0.090771	0.10484	0.077253	0.11836	0.7358	0.11177	0.3157	0.16018	0.43269	0.17595	0.12198	0.17248	0.85745	0.21664	0.12129	0.10631	0.17862	0.077428	0.12601	0.2143	0.099649	0.16561	0.077322	0.073137	0.9101	0.095098	0.47199	0.098107	0.41972	0.095548	0.18009	0.18443	0.14893	0.21269	0.35851	0.10004	0.10109
796	0.2051	0.18894	0.15405	0.071158	0.084575	0.1145	0.11162	0.15164	0.12096	0.15416	0.36805	0.12205	0.093069	0.10741	0.073733	0.12086	0.67588	0.11415	0.26681	0.13189	0.50346	0.14421	0.10365	0.1772	0.80025	0.22589	0.12384	0.092694	0.18379	0.079341	0.12932	0.17566	0.10211	0.16988	0.079229	0.071589	0.86077	0.097233	0.55621	0.10054	0.48591	0.097928	0.18538	0.19007	0.15378	0.22141	0.40332	0.10226	0.10358
797	0.21281	0.19496	0.15768	0.071588	0.086754	0.09836	0.114	0.15516	0.12404	0.1578	0.31649	0.12462	0.095405	0.11004	0.071837	0.1234	0.61669	0.11657	0.22165	0.11075	0.59709	0.11979	0.090861	0.18223	0.74061	0.23643	0.12645	0.083484	0.18936	0.081358	0.13278	0.14394	0.10461	0.17441	0.081241	0.071111	0.80416	0.099399	0.66388	0.10301	0.57411	0.10035	0.19108	0.19619	0.15904	0.23127	0.46317	0.10451	0.10612
798	0.22141	0.20152	0.16148	0.072533	0.088978	0.087258	0.11641	0.15883	0.12724	0.1616	0.26741	0.12723	0.097777	0.11273	0.071108	0.12599	0.55858	0.11902	0.18182	0.095734	0.71179	0.10207	0.082264	0.18764	0.68069	0.24859	0.12911	0.077499	0.19537	0.083451	0.13642	0.11958	0.10717	0.17921	0.08333	0.071402	0.74475	0.10159	0.7837	0.10553	0.68483	0.10281	0.19726	0.20287	0.16481	0.24257	0.54319	0.10678	0.10871
799	0.23113	0.20872	0.16545	0.073848	0.091241	0.079902	0.11885	0.16267	0.13057	0.16558	0.22207	0.12991	0.10019	0.1155	0.071219	0.12863	0.50166	0.12151	0.14879	0.085485	0.82771	0.089759	0.076723	0.19346	0.62138	0.26284	0.13183	0.073838	0.20193	0.085603	0.14026	0.1019	0.10978	0.18435	0.085479	0.072246	0.68486	0.10381	0.88313	0.1081	0.80317	0.10533	0.20401	0.21022	0.1712	0.25571	0.64612	0.10907	0.11136
800	0.24223	0.21671	0.16964	0.075429	0.093539	0.075257	0.12134	0.1667	0.13406	0.16978	0.1821	0.13264	0.10264	0.11835	0.071934	0.13134	0.44597	0.12405	0.12315	0.078752	0.90788	0.081521	0.07338	0.19979	0.56307	0.27984	0.13462	0.071842	0.20912	0.087802	0.14434	0.089635	0.11246	0.18986	0.087676	0.073489	0.62548	0.10606	0.92908	0.11073	0.8943	0.10789	0.21143	0.21838	0.17838	0.27122	0.7635	0.1114	0.11408
801	0.2551	0.22564	0.17406	0.077202	0.095872	0.072557	0.12387	0.17094	0.13773	0.1742	0.14895	0.13544	0.10514	0.12129	0.073083	0.1341	0.39156	0.12664	0.10441	0.074554	0.93022	0.076242	0.071614	0.20671	0.50591	0.30049	0.13748	0.071042	0.21709	0.090041	0.14868	0.08143	0.1152	0.19581	0.089913	0.075019	0.56705	0.10833	0.92145	0.11343	0.92955	0.11051	0.21969	0.22752	0.18654	0.28989	0.86657	0.11375	0.11688
802	0.27024	0.23575	0.17874	0.079113	0.098242	0.071252	0.12644	0.17542	0.1416	0.17889	0.12324	0.13832	0.10769	0.12433	0.074545	0.13693	0.33871	0.12928	0.091323	0.072176	0.90777	0.073088	0.070979	0.21434	0.44996	0.32611	0.14041	0.071102	0.22601	0.092316	0.15335	0.076177	0.11803	0.20229	0.092186	0.076754	0.50975	0.11063	0.88366	0.1162	0.915	0.11319	0.22895	0.2379	0.19597	0.3128	0.92104	0.11613	0.11976
803	0.28838	0.24733	0.18372	0.081125	0.10065	0.070948	0.12907	0.18017	0.14571	0.18389	0.10445	0.14127	0.1103	0.12749	0.076232	0.13984	0.28802	0.13198	0.082521	0.071102	0.86347	0.071458	0.071157	0.22283	0.39529	0.3586	0.14343	0.07178	0.23608	0.094626	0.1584	0.073043	0.12094	0.20938	0.094493	0.078637	0.45363	0.11295	0.83261	0.11905	0.87422	0.11595	0.23946	0.24982	0.20709	0.3415	0.92093	0.11855	0.12274
804	0.31053	0.26079	0.18905	0.083211	0.1031	0.071365	0.13176	0.18523	0.15009	0.18923	0.091334	0.14431	0.11297	0.13078	0.07808	0.14283	0.24057	0.13474	0.076841	0.070965	0.80952	0.070922	0.071921	0.23238	0.34215	0.40063	0.14654	0.072903	0.24762	0.09697	0.1639	0.071427	0.12395	0.21721	0.096835	0.080628	0.39878	0.11531	0.77562	0.12199	0.82187	0.11879	0.25156	0.26372	0.22049	0.37825	0.88714	0.12101	0.12582
805	0.33814	0.27668	0.19479	0.085355	0.10559	0.072301	0.1345	0.19066	0.1548	0.19498	0.082517	0.14744	0.1157	0.13421	0.080044	0.14592	0.19789	0.13756	0.073403	0.071501	0.75138	0.071171	0.073106	0.24325	0.29114	0.4559	0.14976	0.074346	0.26102	0.099349	0.16996	0.070901	0.12708	0.22595	0.099212	0.082699	0.34544	0.1177	0.71643	0.12503	0.76437	0.12171	0.26567	0.28019	0.23709	0.42618	0.83804	0.12351	0.12902
806	0.37327	0.29578	0.201	0.087543	0.10813	0.073608	0.13731	0.1965	0.1599	0.20121	0.076829	0.15067	0.11852	0.13782	0.082094	0.14909	0.16162	0.14046	0.07157	0.072523	0.69195	0.071986	0.074592	0.25578	0.24332	0.52867	0.15308	0.076017	0.27682	0.10177	0.1767	0.071158	0.13033	0.23579	0.10163	0.084829	0.2942	0.12012	0.65691	0.12819	0.70509	0.12474	0.28241	0.30005	0.25828	0.48933	0.78202	0.12605	0.13236
807	0.41882	0.31917	0.20777	0.08977	0.11073	0.075182	0.1402	0.20283	0.16546	0.20799	0.073386	0.15402	0.12142	0.14162	0.084209	0.15238	0.13276	0.14344	0.070888	0.073892	0.63257	0.073207	0.076295	0.27044	0.20022	0.62164	0.15653	0.077854	0.29578	0.10423	0.18429	0.071978	0.13371	0.24702	0.10408	0.087007	0.24608	0.12258	0.59788	0.13148	0.64564	0.12787	0.30262	0.32447	0.28636	0.57164	0.72324	0.12864	0.13585
808	0.47854	0.34839	0.2152	0.092031	0.11339	0.076948	0.14316	0.20974	0.17158	0.21544	0.071551	0.15749	0.12441	0.14564	0.086372	0.15579	0.11123	0.14651	0.071033	0.07551	0.57386	0.074719	0.078153	0.28788	0.16348	0.72946	0.16012	0.079809	0.31895	0.10673	0.19296	0.073203	0.13727	0.25999	0.10659	0.089223	0.2026	0.12508	0.53972	0.13492	0.58675	0.13113	0.3275	0.35512	0.32516	0.67293	0.66382	0.13128	0.13952
809	0.55634	0.38564	0.22343	0.094324	0.11611	0.078852	0.1462	0.21734	0.17839	0.2237	0.070867	0.16111	0.12752	0.14992	0.088577	0.15932	0.095968	0.14967	0.071773	0.077307	0.51611	0.07644	0.080124	0.30899	0.13416	0.83064	0.16386	0.081851	0.34785	0.10929	0.20305	0.074717	0.141	0.2752	0.10914	0.091474	0.16542	0.12763	0.48262	0.13852	0.52877	0.13454	0.35873	0.39433	0.38121	0.78079	0.60473	0.13398	0.14339
810	0.6531	0.4339	0.23262	0.096648	0.11891	0.080856	0.14935	0.22577	0.18607	0.23293	0.071011	0.16487	0.13074	0.1545	0.090816	0.163	0.085569	0.15294	0.072939	0.079233	0.45944	0.07831	0.082178	0.33504	0.11223	0.89376	0.16776	0.083957	0.3846	0.1119	0.21501	0.076439	0.14495	0.29334	0.11175	0.093757	0.13564	0.13022	0.42667	0.14231	0.47184	0.13811	0.39871	0.44527	0.46559	0.8664	0.54642	0.13674	0.14749
811	0.75928	0.49689	0.24302	0.099006	0.1218	0.082933	0.15259	0.23521	0.19485	0.24337	0.071751	0.16881	0.1341	0.15943	0.093087	0.16684	0.078746	0.15633	0.074412	0.081253	0.40399	0.08029	0.084292	0.36781	0.09665	0.90641	0.17185	0.086113	0.4321	0.11457	0.22952	0.078311	0.14914	0.31535	0.11441	0.096071	0.1133	0.13287	0.37207	0.14632	0.4161	0.14186	0.45062	0.51172	0.59451	0.90434	0.4891	0.13956	0.15186
812	0.84926	0.57791	0.25491	0.1014	0.12477	0.085066	0.15594	0.2459	0.20506	0.25531	0.072917	0.17294	0.13762	0.16479	0.095389	0.17087	0.074496	0.15984	0.076104	0.083342	0.35003	0.082348	0.086455	0.4098	0.086018	0.88221	0.17616	0.08831	0.49396	0.11731	0.24761	0.080291	0.15361	0.34258	0.11715	0.098417	0.097389	0.13557	0.31926	0.15059	0.36176	0.14583	0.51818	0.59657	0.77646	0.89682	0.4329	0.14246	0.15655
813	0.89585	0.67598	0.26869	0.10383	0.12786	0.087242	0.15942	0.25816	0.21717	0.26916	0.074389	0.17728	0.14132	0.17066	0.097723	0.17509	0.072086	0.16349	0.077953	0.085484	0.29814	0.084467	0.088656	0.46424	0.07903	0.83834	0.1807	0.090541	0.57345	0.12013	0.27091	0.082349	0.15842	0.37689	0.11996	0.1008	0.086511	0.13833	0.26907	0.15516	0.30933	0.15004	0.60398	0.6971	0.96341	0.86152	0.37802	0.14543	0.16162
814	0.89597	0.77824	0.2849	0.10631	0.13106	0.089455	0.16303	0.27241	0.23186	0.28545	0.07608	0.18186	0.14522	0.17716	0.10009	0.17953	0.070992	0.16729	0.079916	0.087667	0.24938	0.086631	0.090891	0.53467	0.074663	0.78513	0.18551	0.092803	0.66985	0.12303	0.30204	0.084467	0.16363	0.42086	0.12286	0.10322	0.079347	0.14115	0.22285	0.16008	0.25976	0.15454	0.70448	0.79729	1.0519	0.81236	0.32486	0.14849	0.16713
815	0.8654	0.85775	0.30427	0.10883	0.13439	0.0917	0.1668	0.28921	0.25019	0.30494	0.077928	0.18672	0.14935	0.18443	0.10249	0.18424	0.070842	0.17127	0.081961	0.089885	0.20527	0.088833	0.093156	0.62278	0.07217	0.72786	0.19062	0.095095	0.77129	0.12603	0.34538	0.08663	0.16932	0.47774	0.12585	0.10568	0.074855	0.14405	0.18226	0.16541	0.21447	0.15939	0.80261	0.86889	1.041	0.75684	0.27423	0.15164	0.17318
816	0.81874	0.89249	0.32784	0.1114	0.13787	0.093975	0.17073	0.30935	0.27378	0.32865	0.079889	0.19189	0.15376	0.19267	0.10493	0.18923	0.07137	0.17544	0.084067	0.092134	0.16747	0.091067	0.095451	0.72289	0.071018	0.66914	0.19609	0.097418	0.8518	0.12914	0.40832	0.088831	0.17558	0.55078	0.12895	0.10818	0.072274	0.14702	0.14877	0.17125	0.17515	0.16463	0.87036	0.89414	0.99237	0.69871	0.22743	0.15489	0.1799
817	0.76447	0.88508	0.35702	0.11403	0.14153	0.096279	0.17484	0.33393	0.30528	0.35804	0.081932	0.19742	0.15849	0.20216	0.10742	0.19455	0.072384	0.17983	0.086221	0.094413	0.13715	0.093331	0.097777	0.8154	0.070827	0.61024	0.20196	0.099772	0.88904	0.13236	0.5029	0.091063	0.18255	0.64056	0.13217	0.11073	0.071059	0.15008	0.12293	0.1777	0.14314	0.17035	0.89219	0.88001	0.93242	0.63983	0.18613	0.15825	0.18744
818	0.70694	0.85093	0.39377	0.11672	0.14538	0.098614	0.17917	0.36444	0.34908	0.39506	0.084036	0.20336	0.16359	0.21327	0.10995	0.20025	0.073747	0.18446	0.088412	0.096722	0.11435	0.095625	0.10013	0.87389	0.071326	0.55182	0.20831	0.10216	0.88376	0.13572	0.64404	0.093326	0.19042	0.73918	0.13552	0.11334	0.070823	0.15322	0.10414	0.1849	0.11875	0.17666	0.87587	0.84218	0.87078	0.58114	0.15183	0.16173	0.19603
819	0.6483	0.80288	0.44066	0.11948	0.14945	0.10098	0.18373	0.40295	0.41256	0.44231	0.086187	0.20978	0.16915	0.22658	0.11254	0.2064	0.075359	0.18937	0.090636	0.099061	0.098114	0.097948	0.10253	0.88745	0.072319	0.4942	0.21521	0.10459	0.85098	0.13924	0.8282	0.095618	0.19941	0.8255	0.13903	0.11601	0.07129	0.15647	0.091081	0.19305	0.10118	0.18368	0.83701	0.79235	0.80986	0.52309	0.12521	0.16535	0.20596
820	0.58963	0.74829	0.5007	0.12232	0.15379	0.10339	0.18855	0.4521	0.50745	0.50281	0.088376	0.21677	0.17525	0.24289	0.11518	0.21305	0.077149	0.19459	0.092889	0.10143	0.087009	0.1003	0.10496	0.86607	0.073666	0.43757	0.22276	0.10705	0.80382	0.14293	0.98931	0.097939	0.20987	0.87519	0.14271	0.11874	0.072259	0.15982	0.082337	0.20241	0.089078	0.1916	0.78683	0.73693	0.75071	0.46593	0.10575	0.16911	0.21765
821	0.53149	0.69082	0.57624	0.12525	0.15843	0.10583	0.19367	0.51484	0.64794	0.57882	0.090596	0.22442	0.18202	0.26346	0.11788	0.22032	0.079067	0.20016	0.095171	0.10384	0.079689	0.10269	0.10743	0.82495	0.075266	0.3822	0.2311	0.10957	0.74969	0.14682	1.0445	0.10029	0.22227	0.8815	0.14658	0.12156	0.073589	0.16329	0.07672	0.21335	0.08103	0.20067	0.7313	0.67915	0.69369	0.40987	0.092188	0.17304	0.23173
822	0.47416	0.6324	0.66569	0.12827	0.16342	0.10831	0.19913	0.593	0.82963	0.66859	0.092846	0.23287	0.18961	0.29029	0.12066	0.2283	0.081076	0.20615	0.097481	0.10629	0.075094	0.10512	0.10994	0.77379	0.077047	0.32852	0.24037	0.11213	0.69248	0.15093	1.0194	0.10268	0.23731	0.85629	0.15068	0.12445	0.075177	0.16688	0.073339	0.22639	0.075914	0.21121	0.67353	0.62066	0.63888	0.35524	0.083076	0.17714	0.24911
823	0.41786	0.57399	0.75819	0.1314	0.16884	0.11084	0.20498	0.68364	0.98632	0.76087	0.095123	0.24228	0.19824	0.32656	0.12352	0.23713	0.083153	0.21262	0.099822	0.10878	0.072441	0.10759	0.11251	0.71796	0.078958	0.27736	0.25079	0.11475	0.6342	0.15532	0.96768	0.1051	0.25604	0.8134	0.15505	0.12744	0.07695	0.17062	0.071553	0.2423	0.07289	0.22371	0.61511	0.56232	0.5862	0.30266	0.077195	0.18144	0.27119
824	0.36293	0.5161	0.83196	0.13466	0.17477	0.11342	0.21129	0.77354	1.039	0.83368	0.097428	0.25286	0.20821	0.37762	0.12647	0.24702	0.085281	0.21965	0.1022	0.11131	0.071176	0.1101	0.11513	0.66017	0.080962	0.23003	0.26262	0.11743	0.57585	0.16001	0.90763	0.10756	0.28008	0.76155	0.15972	0.13053	0.078854	0.17451	0.070909	0.26226	0.07136	0.23887	0.55685	0.50458	0.53544	0.2532	0.073628	0.18597	0.30023
825	0.30994	0.45903	0.86792	0.13805	0.18132	0.11606	0.21813	0.84035	1.0149	0.86835	0.099764	0.26489	0.21993	0.45217	0.12951	0.25817	0.087449	0.22734	0.1046	0.1139	0.070905	0.11266	0.11782	0.60186	0.083034	0.1882	0.27622	0.12017	0.51796	0.16507	0.84611	0.11007	0.31205	0.70553	0.16476	0.13374	0.080853	0.17857	0.071082	0.28811	0.070898	0.25774	0.49919	0.44769	0.48633	0.20839	0.07171	0.19075	0.33987
826	0.25989	0.40302	0.86533	0.14159	0.18864	0.11877	0.22559	0.86805	0.96312	0.86474	0.10213	0.27871	0.23402	0.56294	0.13267	0.2709	0.089649	0.23582	0.10705	0.11655	0.071345	0.11528	0.12057	0.54376	0.085158	0.15343	0.29204	0.123	0.46085	0.17056	0.78544	0.11263	0.35622	0.64778	0.17022	0.13708	0.082921	0.18283	0.071841	0.32279	0.071203	0.28196	0.44239	0.39194	0.43856	0.16992	0.070972	0.19581	0.39613
827	0.21428	0.34848	0.83615	0.14532	0.19691	0.12154	0.23378	0.85945	0.90291	0.83495	0.10453	0.29481	0.25135	0.7197	0.13595	0.28562	0.091878	0.24524	0.10954	0.11926	0.072296	0.11795	0.1234	0.48628	0.087321	0.12641	0.3107	0.12591	0.40479	0.17657	0.7265	0.11524	0.41961	0.5896	0.1762	0.14056	0.08504	0.18729	0.073021	0.37117	0.072056	0.31415	0.38675	0.33776	0.39188	0.139	0.071078	0.2012	0.4787
828	0.17482	0.29611	0.79187	0.14924	0.20639	0.1244	0.24285	0.82684	0.84138	0.79033	0.10697	0.31383	0.27331	0.89662	0.13937	0.30284	0.094133	0.2558	0.11208	0.12205	0.073613	0.1207	0.12631	0.42969	0.089516	0.10664	0.33305	0.12891	0.35017	0.18322	0.66957	0.11791	0.51314	0.53166	0.1828	0.14422	0.0872	0.19199	0.0745	0.44119	0.073303	0.35859	0.33274	0.28595	0.34619	0.11572	0.071789	0.20695	0.60045
829	0.14281	0.24706	0.73984	0.1534	0.21746	0.12734	0.25298	0.78091	0.78055	0.73814	0.10945	0.33659	0.30204	1.0119	0.14295	0.32328	0.096416	0.26777	0.11467	0.12491	0.07519	0.12352	0.12932	0.37433	0.091741	0.092853	0.3602	0.13201	0.2977	0.19065	0.61472	0.12065	0.64913	0.47436	0.19017	0.14806	0.089392	0.19696	0.076193	0.54458	0.07483	0.42225	0.2812	0.23775	0.30162	0.09912	0.072934	0.21312	0.76562
830	0.11852	0.20293	0.68409	0.15782	0.23063	0.13038	0.2644	0.72815	0.72142	0.68232	0.11198	0.36426	0.34102	1.0264	0.1467	0.34789	0.098726	0.28149	0.11731	0.12786	0.076953	0.12643	0.13244	0.32076	0.093991	0.083589	0.39362	0.13524	0.24851	0.19905	0.56182	0.12346	0.82196	0.41798	0.1985	0.15213	0.091613	0.20223	0.078039	0.6918	0.076558	0.51585	0.23342	0.19482	0.2587	0.087765	0.074389	0.21979	0.93295
831	0.1011	0.16539	0.62678	0.16256	0.24665	0.13352	0.27742	0.67215	0.66428	0.62499	0.11456	0.3983	0.39593	0.98756	0.15067	0.37793	0.10106	0.29739	0.12003	0.13091	0.078848	0.12942	0.13567	0.2699	0.096268	0.077609	0.43518	0.13859	0.20419	0.2087	0.51067	0.12636	0.97138	0.36292	0.20807	0.15644	0.093861	0.20783	0.079995	0.86577	0.078428	0.65116	0.19107	0.15876	0.21844	0.080279	0.076064	0.22702	1.021
832	0.089125	0.13551	0.56906	0.16766	0.26667	0.13679	0.29243	0.61481	0.60917	0.56726	0.11719	0.44058	0.47574	0.93225	0.15486	0.41502	0.10344	0.31606	0.12281	0.13407	0.080839	0.13252	0.13903	0.22318	0.098572	0.073976	0.48697	0.14209	0.16643	0.21997	0.461	0.12935	1.026	0.30979	0.21922	0.16105	0.096134	0.21383	0.082029	0.99427	0.0804	0.82198	0.15573	0.13046	0.18224	0.075571	0.077896	0.23492	1.0168
833	0.081192	0.11323	0.51155	0.17319	0.29245	0.1402	0.30994	0.55718	0.55597	0.50977	0.11989	0.4931	0.59233	0.87171	0.15933	0.46109	0.10584	0.33827	0.12567	0.13735	0.082899	0.13574	0.14255	0.18231	0.1009	0.072013	0.55059	0.14577	0.13633	0.23338	0.41255	0.13244	1.0036	0.25965	0.23248	0.166	0.098433	0.22027	0.08412	1.0237	0.082446	0.96887	0.12818	0.10959	0.15145	0.072843	0.079841	0.24361	0.97183
834	0.076168	0.097463	0.45466	0.17924	0.32679	0.14376	0.33063	0.49982	0.50447	0.4529	0.12266	0.55726	0.75022	0.81044	0.16412	0.518	0.10828	0.36506	0.12862	0.14077	0.08501	0.13909	0.14623	0.14874	0.10327	0.071244	0.62533	0.14963	0.11384	0.24973	0.36518	0.13564	0.95375	0.21401	0.24861	0.17136	0.10076	0.22722	0.086256	0.99099	0.084547	1.0225	0.10797	0.09495	0.12687	0.071528	0.081867	0.25324	0.9145
835	0.073216	0.086738	0.39872	0.18593	0.37423	0.14749	0.35539	0.44312	0.45441	0.397	0.1255	0.63192	0.91445	0.7502	0.16928	0.58638	0.11077	0.39773	0.13166	0.14435	0.087161	0.14258	0.1501	0.12296	0.10566	0.071328	0.705	0.15371	0.097899	0.27017	0.31895	0.13897	0.89472	0.17458	0.26874	0.17719	0.10312	0.23477	0.088427	0.93796	0.08669	1.0005	0.093857	0.085066	0.10837	0.071222	0.083952	0.26401	0.85337
836	0.07174	0.079712	0.34424	0.19339	0.44198	0.15142	0.3854	0.38746	0.40557	0.34257	0.12843	0.71032	1.0084	0.69162	0.17488	0.66319	0.1133	0.43789	0.13482	0.1481	0.089343	0.14624	0.1542	0.1043	0.1081	0.072024	0.77588	0.15804	0.087051	0.2965	0.27427	0.14245	0.83337	0.14267	0.29463	0.18361	0.10551	0.24302	0.090626	0.87811	0.088865	0.95088	0.08436	0.078645	0.095107	0.071637	0.086082	0.27615	0.79216
837	0.07132	0.075337	0.292	0.20181	0.54051	0.15559	0.42208	0.33336	0.35782	0.29042	0.13146	0.77851	1.0113	0.63493	0.18101	0.73876	0.11588	0.48728	0.1381	0.15206	0.091553	0.15009	0.15855	0.091387	0.11057	0.073156	0.82177	0.16267	0.079937	0.3316	0.23205	0.14609	0.7725	0.11851	0.32905	0.19074	0.10794	0.25209	0.092851	0.81681	0.091069	0.89206	0.07822	0.074701	0.085988	0.07257	0.088247	0.28999	0.7322
838	0.071654	0.072847	0.24323	0.21147	0.67906	0.16001	0.46707	0.28172	0.31132	0.24179	0.13459	0.82104	0.96924	0.58013	0.18779	0.79764	0.11852	0.54708	0.14151	0.15625	0.093788	0.15415	0.16319	0.082774	0.11309	0.0746	0.83494	0.16763	0.075499	0.38004	0.1936	0.14992	0.71305	0.1012	0.37644	0.19875	0.11041	0.26214	0.095101	0.75628	0.093299	0.83077	0.074474	0.072519	0.079978	0.073871	0.090442	0.30592	0.67397
839	0.072528	0.071703	0.19959	0.22271	0.84411	0.16474	0.52179	0.23387	0.26656	0.19833	0.13783	0.83147	0.91321	0.52707	0.19535	0.82707	0.12123	0.61646	0.14507	0.1607	0.096047	0.15846	0.16817	0.077267	0.11566	0.076267	0.81993	0.173	0.072966	0.44907	0.16041	0.15395	0.65538	0.089329	0.44386	0.20786	0.11292	0.27337	0.097376	0.69726	0.095553	0.76988	0.072434	0.071594	0.07625	0.075436	0.092662	0.32446	0.61763
840	0.073787	0.07152	0.16273	0.23604	0.97232	0.16983	0.58637	0.1915	0.22455	0.1617	0.14121	0.81487	0.85248	0.47554	0.2039	0.82574	0.124	0.69	0.14882	0.16546	0.098332	0.16306	0.17356	0.073974	0.11829	0.078091	0.78609	0.17884	0.071792	0.54893	0.13349	0.15823	0.59958	0.081476	0.54139	0.2184	0.11548	0.28602	0.099677	0.64004	0.097831	0.71035	0.071611	0.071567	0.074182	0.077188	0.094906	0.34629	0.56313
841	0.075321	0.072023	0.13361	0.25221	1.0099	0.17534	0.6576	0.15619	0.18672	0.13283	0.14474	0.78026	0.79127	0.4253	0.2137	0.8011	0.12685	0.7562	0.15275	0.17059	0.10064	0.16798	0.17943	0.072258	0.12097	0.080029	0.74115	0.18526	0.071586	0.68786	0.11297	0.16279	0.54556	0.076513	0.67781	0.23079	0.1181	0.3004	0.10201	0.58467	0.10014	0.65257	0.071658	0.072183	0.073318	0.079073	0.097175	0.37227	0.51029
842	0.077052	0.073018	0.11203	0.27231	0.98373	0.18136	0.72675	0.12868	0.15449	0.11147	0.14844	0.73505	0.73106	0.37623	0.22512	0.76177	0.12978	0.80113	0.15692	0.17614	0.10298	0.1733	0.18588	0.071666	0.12373	0.082047	0.6901	0.19238	0.072074	0.84972	0.098115	0.16767	0.49314	0.073609	0.83959	0.24567	0.12077	0.3169	0.10436	0.53102	0.10247	0.59662	0.072326	0.073258	0.073327	0.081054	0.09947	0.40344	0.45891
843	0.078921	0.074364	0.096836	0.29802	0.93327	0.18799	0.78067	0.10852	0.12872	0.096449	0.15232	0.68396	0.67244	0.32839	0.23868	0.71398	0.1328	0.81706	0.16134	0.18221	0.10535	0.17909	0.19303	0.071878	0.12656	0.084124	0.63586	0.20037	0.073058	0.97149	0.08781	0.17294	0.4421	0.07217	0.96613	0.26394	0.12352	0.33602	0.10676	0.47891	0.10483	0.54243	0.073438	0.074661	0.073968	0.083103	0.10179	0.44105	0.40878
844	0.080889	0.075959	0.086547	0.33195	0.87428	0.19536	0.80855	0.094452	0.10934	0.086291	0.15643	0.6298	0.61559	0.28216	0.25513	0.66158	0.13594	0.80636	0.16607	0.18889	0.10776	0.18543	0.20106	0.072664	0.12947	0.086245	0.58011	0.20944	0.074395	1.0048	0.080943	0.17865	0.39226	0.071777	1.0049	0.28701	0.12633	0.3584	0.10918	0.4281	0.10723	0.4898	0.074867	0.076296	0.07507	0.085203	0.10414	0.48628	0.35982
845	0.082929	0.077731	0.079843	0.37824	0.8132	0.20365	0.8086	0.084998	0.095465	0.07968	0.16078	0.57417	0.56051	0.23843	0.27559	0.60683	0.13918	0.77658	0.17115	0.19633	0.1102	0.19245	0.21018	0.07386	0.13247	0.088401	0.52384	0.2199	0.075984	0.97742	0.076603	0.18492	0.34362	0.07213	0.98006	0.31701	0.12923	0.38479	0.11165	0.37849	0.10966	0.43854	0.076521	0.078098	0.076504	0.087343	0.10652	0.5398	0.3122
846	0.085022	0.07963	0.075702	0.44336	0.75243	0.2131	0.78659	0.078894	0.085928	0.075606	0.16543	0.51803	0.50705	0.19853	0.30176	0.55101	0.14256	0.73491	0.17664	0.20471	0.11269	0.2003	0.2207	0.075349	0.13557	0.090585	0.46765	0.23217	0.077753	0.92678	0.074097	0.19183	0.29648	0.073018	0.93033	0.35731	0.13221	0.41612	0.11416	0.33013	0.11214	0.38849	0.078335	0.080018	0.078182	0.089513	0.10894	0.60066	0.2665
847	0.087155	0.08162	0.073385	0.53634	0.69293	0.22405	0.74996	0.075181	0.079639	0.073336	0.1704	0.46199	0.455	0.16398	0.33628	0.49494	0.14609	0.68633	0.18263	0.21427	0.11522	0.2092	0.23303	0.077045	0.13878	0.092794	0.41203	0.24683	0.079648	0.86786	0.072919	0.19956	0.25157	0.074286	0.8717	0.41321	0.1353	0.45334	0.11673	0.28344	0.11466	0.33967	0.080264	0.082022	0.080038	0.091709	0.1114	0.66462	0.22376
848	0.089319	0.083674	0.072366	0.66508	0.63505	0.23695	0.7045	0.073168	0.075723	0.072351	0.17578	0.40654	0.40421	0.13588	0.38333	0.43914	0.14978	0.63391	0.18921	0.22535	0.1178	0.21942	0.24779	0.078889	0.14213	0.095027	0.35753	0.26477	0.081635	0.80686	0.072701	0.2083	0.21011	0.075825	0.81074	0.49258	0.13849	0.49725	0.11934	0.2393	0.11722	0.29243	0.082275	0.084087	0.082027	0.093929	0.1139	0.72328	0.18545
849	0.09151	0.085777	0.072272	0.81902	0.57889	0.25245	0.65397	0.072365	0.073526	0.072281	0.18162	0.35225	0.35465	0.11442	0.44932	0.38413	0.15366	0.57951	0.19652	0.23842	0.12043	0.23135	0.26583	0.080839	0.14561	0.097283	0.30494	0.28727	0.083687	0.74612	0.073179	0.2183	0.17362	0.077557	0.74995	0.60469	0.14181	0.54793	0.12201	0.19905	0.11985	0.24755	0.084344	0.086198	0.084116	0.096173	0.11645	0.76607	0.15303
850	0.093724	0.087917	0.072839	0.9456	0.52435	0.27152	0.60069	0.072427	0.072573	0.072866	0.18802	0.29996	0.30655	0.09889	0.54304	0.33058	0.15775	0.52423	0.20472	0.25415	0.12313	0.24555	0.28847	0.082863	0.14925	0.099562	0.25544	0.31631	0.085788	0.6866	0.07416	0.22995	0.14342	0.079426	0.69033	0.75032	0.14526	0.60385	0.12475	0.16422	0.12253	0.20632	0.086458	0.088344	0.086283	0.098439	0.11905	0.78563	0.1273
851	0.095962	0.090086	0.073879	0.99104	0.47127	0.29561	0.54602	0.073105	0.072518	0.073918	0.1951	0.25089	0.26058	0.088109	0.67163	0.27946	0.16208	0.46877	0.21404	0.27352	0.12589	0.26281	0.3177	0.084943	0.15307	0.10187	0.21062	0.35499	0.087925	0.62866	0.075506	0.24377	0.11997	0.081393	0.63228	0.89638	0.14888	0.66071	0.12756	0.13593	0.12528	0.17027	0.088607	0.090519	0.088514	0.10073	0.12171	0.7817	0.10807
852	0.098222	0.092281	0.075255	0.9729	0.41949	0.32692	0.49083	0.074224	0.073115	0.075302	0.20302	0.20666	0.21789	0.080916	0.82296	0.23218	0.1667	0.41368	0.2248	0.29801	0.12873	0.28432	0.35661	0.087065	0.1571	0.1042	0.17219	0.40809	0.090093	0.57237	0.077117	0.2605	0.10277	0.08343	0.57589	0.97918	0.15266	0.71118	0.13045	0.11436	0.1281	0.14066	0.090784	0.092719	0.090801	0.10305	0.12443	0.75907	0.094379
853	0.10051	0.094499	0.07687	0.92665	0.36896	0.3689	0.43575	0.075655	0.074182	0.076924	0.21198	0.16897	0.18001	0.076353	0.94431	0.19046	0.17164	0.35957	0.23741	0.3299	0.13166	0.31186	0.41001	0.089219	0.16135	0.10656	0.14133	0.48275	0.092286	0.51766	0.078921	0.28124	0.090698	0.085519	0.52107	0.98373	0.15665	0.7469	0.13343	0.098765	0.131	0.11783	0.092985	0.094941	0.093137	0.1054	0.12722	0.72355	0.085019
854	0.10282	0.09674	0.078655	0.86911	0.31984	0.42685	0.38134	0.07731	0.07559	0.078713	0.22226	0.13889	0.14835	0.073693	0.98621	0.15582	0.17697	0.30725	0.25249	0.3727	0.13467	0.3482	0.48499	0.0914	0.16588	0.10896	0.11811	0.58756	0.094502	0.46438	0.080867	0.30766	0.082558	0.087646	0.4677	0.94735	0.16086	0.76247	0.1365	0.08795	0.13399	0.10119	0.095209	0.097187	0.095521	0.10777	0.13008	0.67985	0.078878
855	0.10516	0.099003	0.080561	0.80862	0.27271	0.50834	0.32831	0.079123	0.077244	0.080622	0.23423	0.11639	0.12354	0.072408	0.96714	0.12893	0.18274	0.2579	0.27092	0.4318	0.13778	0.39762	0.59	0.093604	0.17072	0.11139	0.10157	0.72493	0.096741	0.41239	0.082918	0.34232	0.077309	0.089805	0.41562	0.89345	0.16533	0.75777	0.13969	0.080742	0.13708	0.08957	0.097455	0.099455	0.097953	0.11019	0.13303	0.6312	0.075079
856	0.10753	0.10129	0.082552	0.74776	0.22861	0.62129	0.2777	0.081048	0.079079	0.082616	0.24845	0.10043	0.10521	0.072114	0.92077	0.10927	0.18906	0.21311	0.29402	0.51481	0.14101	0.46651	0.72702	0.095831	0.17591	0.11387	0.090263	0.86943	0.099003	0.36166	0.085051	0.38917	0.074156	0.091989	0.36481	0.83388	0.1701	0.73643	0.14299	0.076173	0.14028	0.081772	0.099725	0.10175	0.10044	0.11264	0.13608	0.57968	0.072972
857	0.10993	0.1036	0.084607	0.68784	0.18904	0.76312	0.23095	0.083054	0.081046	0.084672	0.26567	0.089569	0.092281	0.072538	0.86338	0.095572	0.19602	0.17458	0.32377	0.62932	0.14436	0.56302	0.87013	0.098081	0.18153	0.11638	0.082832	0.96248	0.10129	0.31246	0.087249	0.45416	0.072515	0.094197	0.31549	0.77301	0.17522	0.70313	0.14643	0.073511	0.1436	0.076775	0.10202	0.10407	0.10297	0.11513	0.13923	0.5266	0.072087
858	0.11237	0.10595	0.086707	0.6293	0.15549	0.89833	0.18975	0.085119	0.083112	0.086774	0.28704	0.082456	0.083512	0.07348	0.803	0.086391	0.20377	0.14352	0.36324	0.77128	0.14785	0.69169	0.96151	0.10035	0.18766	0.11895	0.078181	0.97802	0.1036	0.26542	0.089501	0.54515	0.071967	0.096427	0.26828	0.71257	0.18075	0.66187	0.15001	0.072225	0.14705	0.073807	0.10434	0.10642	0.10557	0.11767	0.1425	0.47283	0.072083
859	0.11485	0.10832	0.088843	0.57229	0.12885	0.97003	0.15561	0.087227	0.085254	0.08891	0.31426	0.078032	0.077814	0.074796	0.74221	0.080489	0.21251	0.12006	0.41708	0.90329	0.15149	0.83564	0.97617	0.10265	0.19439	0.12157	0.075506	0.94737	0.10594	0.22171	0.0918	0.66793	0.072206	0.09868	0.22432	0.65335	0.18676	0.61553	0.15377	0.071933	0.15066	0.0723	0.10669	0.1088	0.10822	0.12026	0.14589	0.41905	0.072716
860	0.11738	0.11073	0.091008	0.51679	0.10893	0.97016	0.12913	0.089368	0.087456	0.091076	0.34993	0.075519	0.074341	0.076383	0.68228	0.076926	0.22248	0.10329	0.492	0.97	0.15532	0.94278	0.94534	0.10498	0.20186	0.12425	0.074237	0.89641	0.10831	0.18287	0.094144	0.81095	0.073014	0.10096	0.18512	0.59559	0.19336	0.56609	0.15771	0.072357	0.15444	0.071848	0.10907	0.11121	0.11095	0.12291	0.14943	0.36592	0.073808
861	0.11995	0.11317	0.093197	0.46268	0.094772	0.93304	0.1098	0.091538	0.08971	0.093265	0.39802	0.074364	0.072473	0.078166	0.62368	0.075026	0.23403	0.091804	0.59556	0.96728	0.15934	0.97439	0.89439	0.10733	0.21023	0.12699	0.073966	0.8378	0.11071	0.15034	0.096532	0.92749	0.074234	0.10326	0.15216	0.53935	0.20065	0.51483	0.16188	0.073299	0.15841	0.072158	0.11149	0.11366	0.11376	0.12561	0.15313	0.31427	0.075233
862	0.12258	0.11566	0.095408	0.40986	0.085092	0.87946	0.096336	0.093731	0.092009	0.095478	0.46437	0.074176	0.07176	0.080092	0.56657	0.074307	0.24764	0.08424	0.72831	0.92897	0.16359	0.95196	0.83583	0.10972	0.21973	0.1298	0.074407	0.77725	0.11315	0.12482	0.098965	0.97175	0.07575	0.10558	0.1262	0.48453	0.20881	0.46266	0.16629	0.074615	0.1626	0.073017	0.11394	0.11616	0.11666	0.12839	0.15701	0.26527	0.076898
863	0.12527	0.11819	0.097642	0.35837	0.078738	0.82024	0.087322	0.095946	0.094352	0.097712	0.55634	0.074675	0.071882	0.082124	0.51092	0.074429	0.26399	0.079495	0.8646	0.87499	0.1681	0.90498	0.77532	0.11214	0.23067	0.13269	0.075355	0.7167	0.11564	0.10595	0.10145	0.95624	0.077481	0.10794	0.10695	0.43104	0.21804	0.41032	0.17098	0.0762	0.16704	0.074273	0.11644	0.1187	0.11966	0.13123	0.1611	0.22045	0.078737
864	0.12802	0.12077	0.099898	0.30852	0.074797	0.75961	0.08154	0.098184	0.096736	0.099968	0.67823	0.075665	0.072605	0.084237	0.45663	0.075149	0.28406	0.076757	0.95118	0.81571	0.1729	0.8478	0.71479	0.1146	0.24346	0.13567	0.076664	0.65715	0.11816	0.092648	0.10398	0.9125	0.079368	0.11033	0.093337	0.37884	0.22862	0.35852	0.17601	0.077982	0.17177	0.075815	0.11898	0.12129	0.12277	0.13416	0.16543	0.18149	0.080704
865	0.13085	0.12341	0.10218	0.26106	0.072593	0.69927	0.078065	0.10044	0.099164	0.10225	0.81619	0.077002	0.073762	0.086412	0.40363	0.076296	0.30932	0.075443	0.96572	0.7551	0.17806	0.78768	0.65525	0.1171	0.25869	0.13874	0.078228	0.59894	0.12074	0.083626	0.10656	0.85653	0.08137	0.11276	0.084083	0.32814	0.24095	0.30817	0.18142	0.079905	0.17684	0.077564	0.12158	0.12394	0.12601	0.13718	0.17002	0.14969	0.082766
866	0.13375	0.1261	0.10448	0.21724	0.07164	0.64001	0.076229	0.10273	0.10164	0.10455	0.92445	0.078588	0.075233	0.088638	0.352	0.077745	0.34195	0.075142	0.93593	0.69482	0.18362	0.72709	0.59702	0.11965	0.27721	0.14192	0.079975	0.54216	0.12337	0.077756	0.10921	0.79677	0.083458	0.11522	0.078045	0.27949	0.25555	0.26048	0.18728	0.081934	0.1823	0.079463	0.12423	0.12665	0.12939	0.1403	0.17493	0.12538	0.0849
867	0.13674	0.12886	0.10681	0.17863	0.071588	0.58209	0.075556	0.10504	0.10416	0.10689	0.96312	0.080348	0.07693	0.090909	0.30213	0.079409	0.38527	0.075561	0.88601	0.63561	0.18967	0.66724	0.5402	0.12225	0.30025	0.14521	0.08185	0.48676	0.12606	0.074167	0.11193	0.73619	0.085612	0.11773	0.074335	0.23395	0.2732	0.21702	0.19368	0.084042	0.18822	0.081473	0.12694	0.12942	0.13294	0.14353	0.1802	0.10781	0.087091
868	0.13983	0.13169	0.10918	0.14665	0.072187	0.52558	0.075711	0.10737	0.10674	0.10925	0.94614	0.082233	0.07879	0.093222	0.25483	0.081225	0.44415	0.076493	0.82814	0.57774	0.19629	0.60861	0.48477	0.12491	0.32966	0.14864	0.083817	0.43268	0.12881	0.072218	0.11473	0.67617	0.08782	0.12028	0.072299	0.19302	0.29503	0.17941	0.20073	0.086211	0.19469	0.083567	0.12972	0.13227	0.13668	0.14688	0.1859	0.095691	0.089331
869	0.14302	0.13461	0.11157	0.12183	0.073254	0.47042	0.076456	0.10974	0.10938	0.11165	0.9022	0.084208	0.080771	0.095573	0.21144	0.08315	0.525	0.077789	0.76796	0.52125	0.2036	0.55134	0.43064	0.12762	0.36822	0.15221	0.085851	0.37991	0.13164	0.07145	0.11761	0.61728	0.090073	0.12289	0.071468	0.15826	0.32268	0.14884	0.20857	0.088431	0.20182	0.085724	0.13257	0.1352	0.14064	0.15037	0.1921	0.087651	0.091613
870	0.14633	0.1376	0.114	0.10366	0.074659	0.41655	0.077618	0.11214	0.11209	0.11408	0.8468	0.086247	0.08284	0.097966	0.17356	0.085153	0.63311	0.079344	0.70756	0.46611	0.21175	0.49545	0.37783	0.13041	0.42003	0.15594	0.087934	0.32868	0.13454	0.071533	0.12059	0.55973	0.092367	0.12555	0.071505	0.13061	0.35866	0.12552	0.21738	0.090695	0.20975	0.087933	0.1355	0.13822	0.14485	0.15401	0.1989	0.082567	0.093934
871	0.14977	0.1407	0.11647	0.090953	0.076307	0.36404	0.079077	0.11458	0.11487	0.11655	0.78738	0.088333	0.084977	0.1004	0.14251	0.087213	0.76261	0.081081	0.64797	0.41226	0.22095	0.44086	0.32658	0.13327	0.49078	0.15985	0.090054	0.27957	0.13753	0.072227	0.12368	0.50354	0.094699	0.12828	0.072168	0.10995	0.40664	0.10872	0.22739	0.092998	0.21867	0.090186	0.13852	0.14133	0.14937	0.15782	0.20642	0.079589	0.096294
872	0.15336	0.1439	0.11899	0.0824	0.078131	0.31323	0.080746	0.11706	0.11774	0.11906	0.72704	0.090456	0.087168	0.10288	0.11866	0.089315	0.88143	0.082949	0.58957	0.35978	0.23147	0.38758	0.2775	0.13621	0.58656	0.16397	0.092205	0.23368	0.14061	0.073363	0.12689	0.44865	0.097071	0.13107	0.07328	0.095275	0.47187	0.09714	0.23895	0.095339	0.22884	0.092478	0.14164	0.14456	0.15425	0.16182	0.21484	0.078106	0.098694
873	0.15711	0.14722	0.12155	0.076883	0.080083	0.26484	0.082566	0.11958	0.1207	0.12163	0.66714	0.092609	0.089404	0.10541	0.10136	0.09145	0.94575	0.08491	0.53249	0.30905	0.24366	0.33581	0.23172	0.13924	0.70759	0.16832	0.09438	0.19252	0.1438	0.074817	0.13024	0.39507	0.099482	0.13394	0.074717	0.085255	0.56048	0.089484	0.2525	0.09772	0.24057	0.094809	0.14487	0.1479	0.15955	0.16604	0.22436	0.077686	0.10114
874	0.16104	0.15067	0.12416	0.073553	0.082128	0.22015	0.084491	0.12215	0.12376	0.12424	0.60826	0.094786	0.09168	0.10799	0.089342	0.093613	0.94677	0.086939	0.47672	0.26086	0.25803	0.28609	0.19077	0.14237	0.83385	0.17294	0.096579	0.15766	0.1471	0.0765	0.13374	0.34296	0.10194	0.13689	0.076387	0.078676	0.675	0.08467	0.26866	0.10014	0.25435	0.097177	0.14821	0.15138	0.16538	0.1705	0.23528	0.07802	0.10362
875	0.16518	0.15426	0.12683	0.071792	0.084245	0.18074	0.086494	0.12477	0.12695	0.12691	0.55063	0.096986	0.093993	0.11064	0.081307	0.0958	0.91075	0.089017	0.42223	0.2165	0.2753	0.23948	0.15619	0.14561	0.92315	0.17787	0.098799	0.13002	0.15054	0.078348	0.13743	0.29282	0.10444	0.13993	0.078227	0.074583	0.80199	0.081884	0.28835	0.1026	0.27082	0.099585	0.1517	0.155	0.17184	0.17525	0.24798	0.07889	0.10616
876	0.16956	0.15802	0.12956	0.07116	0.086417	0.14806	0.088553	0.12745	0.13027	0.12965	0.49429	0.099209	0.096343	0.11335	0.076167	0.098009	0.85968	0.091134	0.36911	0.17759	0.29647	0.19745	0.12887	0.14897	0.94855	0.18315	0.10104	0.10943	0.15411	0.080316	0.14133	0.24561	0.10699	0.14306	0.080188	0.072276	0.90367	0.080539	0.31286	0.10512	0.2909	0.10204	0.15533	0.1588	0.1791	0.18033	0.263	0.08014	0.10876
877	0.1742	0.16196	0.13236	0.071341	0.088635	0.1227	0.090654	0.13019	0.13374	0.13245	0.43921	0.10145	0.098731	0.11613	0.073109	0.10024	0.8022	0.093281	0.31767	0.14552	0.32304	0.1616	0.10858	0.15246	0.92477	0.18885	0.10331	0.094842	0.15785	0.082372	0.14548	0.2028	0.1096	0.14631	0.08224	0.071251	0.94531	0.080216	0.34413	0.10768	0.31595	0.10453	0.15912	0.16278	0.18736	0.18579	0.28111	0.081659	0.11141
878	0.17915	0.1661	0.13523	0.072106	0.090891	0.10414	0.092789	0.13301	0.13739	0.13532	0.38546	0.10372	0.10116	0.119	0.071546	0.10249	0.74241	0.095454	0.26866	0.12077	0.35719	0.13297	0.094247	0.1561	0.87882	0.19505	0.1056	0.08491	0.16176	0.084496	0.14991	0.166	0.11227	0.14968	0.08436	0.071148	0.93157	0.080619	0.38498	0.1103	0.34795	0.10708	0.16311	0.16697	0.19694	0.1917	0.30342	0.083371	0.11413
879	0.18446	0.17048	0.13819	0.073292	0.093184	0.091185	0.094952	0.13589	0.14125	0.13828	0.33326	0.10601	0.10363	0.12196	0.071056	0.10477	0.68244	0.09765	0.22332	0.10277	0.40213	0.11152	0.084503	0.15991	0.8237	0.20183	0.10791	0.078402	0.16588	0.086673	0.15467	0.13635	0.11501	0.15318	0.086533	0.07171	0.88985	0.081536	0.43948	0.11299	0.38982	0.10968	0.1673	0.1714	0.20824	0.19814	0.33154	0.085218	0.11693
880	0.19019	0.17513	0.14123	0.07478	0.095512	0.082466	0.097139	0.13886	0.14533	0.14133	0.28325	0.10833	0.10615	0.12503	0.071338	0.10707	0.62315	0.099869	0.18325	0.090235	0.46234	0.096259	0.078133	0.16391	0.76469	0.20931	0.11026	0.074364	0.17023	0.088892	0.15983	0.11397	0.11783	0.15684	0.08875	0.072749	0.83666	0.082819	0.51283	0.11575	0.4457	0.11235	0.17174	0.17611	0.2219	0.2052	0.36782	0.087164	0.11981
881	0.19641	0.18008	0.14438	0.076486	0.097876	0.076838	0.099349	0.14192	0.14969	0.14448	0.2365	0.11068	0.10872	0.12822	0.072177	0.1094	0.56491	0.10211	0.14993	0.081832	0.54309	0.085829	0.074196	0.16812	0.70474	0.21764	0.11263	0.072099	0.17484	0.091149	0.16547	0.097954	0.12074	0.16066	0.091005	0.074132	0.77844	0.084361	0.60951	0.11858	0.52078	0.11508	0.17645	0.18113	0.23885	0.21303	0.41569	0.08918	0.12279
882	0.20321	0.18539	0.14763	0.078349	0.10028	0.073434	0.10158	0.14508	0.15437	0.14773	0.19458	0.11306	0.11135	0.13154	0.073416	0.11176	0.50786	0.10437	0.124	0.076435	0.64734	0.078964	0.072003	0.17257	0.64512	0.22703	0.11504	0.071105	0.17974	0.093441	0.1717	0.086958	0.12375	0.16467	0.093295	0.075762	0.71864	0.086087	0.72628	0.12151	0.61915	0.11789	0.18148	0.18652	0.26058	0.22179	0.47978	0.09125	0.12587
883	0.21071	0.19112	0.151	0.080325	0.10272	0.071623	0.10384	0.14836	0.15943	0.15111	0.15906	0.11547	0.11405	0.13501	0.074941	0.11416	0.45203	0.10666	0.10501	0.073196	0.76648	0.074673	0.071061	0.1773	0.58638	0.23773	0.11749	0.071026	0.185	0.095767	0.17865	0.079683	0.12686	0.16889	0.095619	0.07757	0.6589	0.087945	0.84051	0.12454	0.7363	0.12078	0.18687	0.19234	0.28947	0.23171	0.56509	0.09336	0.12908
884	0.21907	0.19732	0.15451	0.082385	0.10521	0.070957	0.10612	0.15175	0.16495	0.15462	0.1309	0.11792	0.11681	0.13866	0.076674	0.11659	0.39747	0.10898	0.091732	0.071504	0.87074	0.072227	0.071019	0.18234	0.52875	0.25011	0.11998	0.071604	0.19066	0.098128	0.1865	0.075098	0.1301	0.17335	0.097978	0.079505	0.5999	0.089899	0.91445	0.12768	0.84786	0.12378	0.19269	0.19866	0.32955	0.24307	0.67286	0.095503	0.13242
885	0.22847	0.20411	0.15816	0.084508	0.10774	0.071112	0.10842	0.15528	0.17102	0.15828	0.10995	0.12041	0.11966	0.1425	0.078554	0.11905	0.34442	0.11132	0.082785	0.070923	0.92443	0.071103	0.071624	0.18775	0.47232	0.26463	0.12251	0.072654	0.19678	0.10053	0.19552	0.072441	0.13348	0.17809	0.10037	0.081535	0.54196	0.091922	0.93004	0.13094	0.9161	0.12687	0.19902	0.20558	0.38766	0.25629	0.79058	0.097674	0.13591
886	0.23918	0.21158	0.16198	0.086681	0.11033	0.07186	0.11075	0.15895	0.17776	0.1621	0.095118	0.12295	0.12259	0.14657	0.080543	0.12156	0.29344	0.1137	0.077	0.07114	0.92375	0.070932	0.072694	0.19358	0.41711	0.28199	0.12509	0.074045	0.20347	0.10296	0.20606	0.071169	0.13702	0.18315	0.10281	0.083634	0.48517	0.093998	0.90466	0.13435	0.92743	0.1301	0.20593	0.21321	0.47545	0.27192	0.88432	0.099869	0.13958
887	0.25154	0.21989	0.16598	0.088893	0.11298	0.073032	0.11312	0.1628	0.18535	0.16611	0.085022	0.12553	0.12563	0.15092	0.082611	0.12412	0.24556	0.11611	0.073487	0.071932	0.88986	0.071444	0.074099	0.19992	0.3633	0.30313	0.12772	0.07568	0.21083	0.10545	0.21862	0.07089	0.14074	0.18857	0.10529	0.085787	0.42959	0.096115	0.8587	0.13792	0.89995	0.13345	0.21357	0.22172	0.60944	0.29074	0.92429	0.10209	0.14346
888	0.26602	0.22923	0.1702	0.091141	0.11569	0.07451	0.11551	0.16683	0.19403	0.17033	0.078411	0.12817	0.12878	0.15557	0.084739	0.12672	0.20228	0.11855	0.071602	0.073137	0.84012	0.072447	0.075743	0.20685	0.31133	0.32942	0.13041	0.077489	0.21899	0.10797	0.23397	0.071324	0.14467	0.19442	0.10781	0.087982	0.37535	0.098265	0.8037	0.14168	0.85314	0.13697	0.22207	0.2313	0.7957	0.31384	0.91473	0.10433	0.14756
889	0.28329	0.23984	0.17464	0.093421	0.11848	0.076207	0.11795	0.17108	0.20409	0.17479	0.074309	0.13087	0.13206	0.1606	0.086914	0.12938	0.16524	0.12104	0.070883	0.074637	0.78361	0.073804	0.07756	0.2145	0.26207	0.36283	0.13316	0.079425	0.22814	0.11056	0.25328	0.072272	0.14884	0.20076	0.11039	0.090215	0.32282	0.10044	0.74514	0.14566	0.79785	0.14066	0.23164	0.24222	0.9773	0.34282	0.87671	0.1066	0.15194
890	0.30427	0.25206	0.17936	0.095734	0.12135	0.078061	0.12042	0.17557	0.21601	0.17951	0.072001	0.13362	0.13548	0.16606	0.089127	0.1321	0.13557	0.12357	0.071002	0.07635	0.72459	0.075413	0.0795	0.22301	0.21687	0.40617	0.13598	0.081453	0.23852	0.1132	0.27837	0.073589	0.1533	0.2077	0.11303	0.09248	0.27278	0.10265	0.68557	0.14989	0.73924	0.14456	0.24255	0.25483	1.0541	0.37994	0.82536	0.10889	0.15664
891	0.33027	0.26635	0.18439	0.098078	0.12431	0.080028	0.12293	0.18033	0.23044	0.18455	0.07098	0.13645	0.13907	0.17206	0.091375	0.13488	0.11328	0.12615	0.071722	0.078215	0.66502	0.077204	0.081531	0.23259	0.17739	0.46321	0.13888	0.083549	0.25043	0.1159	0.31226	0.075169	0.15808	0.21536	0.11573	0.094777	0.22647	0.10488	0.62618	0.1544	0.67972	0.14869	0.25513	0.26962	1.0366	0.4284	0.76833	0.11121	0.16171
892	0.36319	0.28332	0.18977	0.10046	0.12738	0.082079	0.12549	0.1854	0.2484	0.18994	0.070882	0.13935	0.14284	0.17872	0.093654	0.13774	0.09739	0.12878	0.072876	0.080191	0.60586	0.079125	0.083629	0.24348	0.14504	0.53827	0.14185	0.085697	0.26431	0.11868	0.35999	0.076939	0.16326	0.22387	0.1185	0.097105	0.18555	0.10714	0.56753	0.15926	0.62041	0.1531	0.26988	0.28726	0.98672	0.49228	0.70925	0.11356	0.16723
893	0.40567	0.30386	0.19556	0.10287	0.13056	0.084191	0.1281	0.19084	0.27144	0.19575	0.071447	0.14233	0.14683	0.18619	0.095964	0.14067	0.086521	0.13146	0.074339	0.082247	0.54753	0.081141	0.085778	0.25605	0.12022	0.63359	0.14492	0.087886	0.28074	0.12154	0.43008	0.078845	0.16891	0.23344	0.12135	0.099467	0.15151	0.10942	0.50987	0.16452	0.56185	0.15783	0.28746	0.30869	0.92686	0.57549	0.64982	0.11595	0.17329
894	0.46128	0.32919	0.20184	0.10533	0.13387	0.086351	0.13076	0.19669	0.30211	0.20204	0.072488	0.1454	0.15107	0.19468	0.098306	0.14369	0.079358	0.13421	0.076024	0.084363	0.49024	0.083227	0.087968	0.27076	0.10224	0.74238	0.14808	0.090111	0.30053	0.12449	0.53581	0.080849	0.17513	0.24432	0.12429	0.10186	0.12504	0.11173	0.45333	0.17027	0.50429	0.16294	0.30879	0.33525	0.86524	0.67761	0.59087	0.11836	0.18003
895	0.53406	0.36109	0.20869	0.10783	0.13733	0.08855	0.13348	0.20304	0.3446	0.20891	0.07387	0.14857	0.1556	0.2045	0.10068	0.14679	0.074865	0.13702	0.077868	0.086526	0.43408	0.085366	0.090193	0.28826	0.08979	0.84071	0.15134	0.092367	0.32483	0.12753	0.69068	0.082926	0.18205	0.25686	0.12734	0.1043	0.10566	0.11407	0.39802	0.17661	0.44783	0.1685	0.33518	0.36882	0.8045	0.78529	0.53277	0.12082	0.18759
896	0.62615	0.40202	0.21621	0.11038	0.14095	0.090782	0.13627	0.20997	0.40597	0.21645	0.075497	0.15184	0.16047	0.21605	0.10309	0.15	0.072281	0.13991	0.079828	0.088727	0.37924	0.087547	0.092449	0.30945	0.081478	0.89812	0.15473	0.094654	0.35527	0.1307	0.87794	0.085058	0.18985	0.27151	0.13049	0.10678	0.092115	0.11644	0.34426	0.18368	0.39263	0.17461	0.36851	0.41206	0.74555	0.86932	0.4757	0.12331	0.19619
897	0.73173	0.45527	0.22455	0.11299	0.14477	0.093045	0.13912	0.21759	0.49751	0.22482	0.0773	0.15523	0.16574	0.22994	0.10555	0.15332	0.071062	0.14287	0.08187	0.09096	0.32611	0.089763	0.094735	0.33562	0.07616	0.90536	0.15824	0.096971	0.39413	0.13399	1.0152	0.087232	0.19876	0.2889	0.13377	0.1093	0.083003	0.11885	0.29266	0.19166	0.33901	0.18139	0.41135	0.46843	0.68874	0.90514	0.41978	0.12585	0.20615
898	0.829	0.52466	0.23389	0.11565	0.14881	0.095338	0.14206	0.22605	0.63365	0.2342	0.079227	0.15875	0.1715	0.24708	0.10804	0.15676	0.070823	0.14593	0.083974	0.093224	0.27547	0.09201	0.097051	0.36855	0.072988	0.87805	0.16189	0.099319	0.4445	0.13742	1.0422	0.089442	0.2091	0.30993	0.13719	0.11188	0.077114	0.12129	0.24433	0.20081	0.28765	0.18901	0.4671	0.54168	0.63414	0.89606	0.36525	0.12843	0.21788
899	0.88846	0.61256	0.24446	0.11839	0.1531	0.09766	0.14507	0.23553	0.81353	0.24481	0.081246	0.16242	0.17785	0.26885	0.11059	0.16033	0.071286	0.14907	0.086126	0.095517	0.22861	0.094287	0.099398	0.41075	0.07135	0.83261	0.16571	0.1017	0.51007	0.14102	1.007	0.091684	0.22135	0.33583	0.14078	0.11451	0.073534	0.12377	0.20083	0.21146	0.23971	0.19768	0.53945	0.63337	0.58165	0.85994	0.31259	0.13107	0.232
900	0.8996	0.71451	0.25657	0.1212	0.15769	0.10001	0.14818	0.24627	0.97627	0.25697	0.083333	0.16624	0.18492	0.29746	0.11318	0.16406	0.072254	0.15232	0.088317	0.09784	0.18717	0.096593	0.10178	0.46548	0.07081	0.77867	0.1697	0.10412	0.59365	0.1448	0.95214	0.093954	0.23618	0.36833	0.14455	0.11721	0.071605	0.12629	0.1638	0.22411	0.19677	0.20772	0.62998	0.73653	0.53106	0.81034	0.26273	0.13376	0.24945
901	0.87534	0.81189	0.27063	0.12409	0.16263	0.1024	0.15138	0.25858	1.0387	0.27109	0.085469	0.17024	0.1929	0.3365	0.11584	0.16795	0.073584	0.15568	0.090539	0.10019	0.15268	0.09893	0.1042	0.53625	0.071058	0.7211	0.17389	0.10658	0.6927	0.1488	0.89127	0.096254	0.25461	0.40984	0.14853	0.11998	0.070856	0.12886	0.13431	0.23949	0.16046	0.21954	0.73216	0.82932	0.48208	0.75462	0.21708	0.13652	0.27164
902	0.83185	0.87641	0.2872	0.12707	0.16798	0.10483	0.15469	0.2729	1.018	0.28775	0.087646	0.17444	0.20202	0.39193	0.11856	0.17202	0.075172	0.15917	0.092791	0.10258	0.12585	0.1013	0.10665	0.62464	0.071871	0.66228	0.17831	0.10908	0.792	0.15304	0.82985	0.098584	0.27822	0.46347	0.15275	0.12283	0.070954	0.13148	0.11229	0.2587	0.13175	0.23377	0.8249	0.88422	0.43443	0.69642	0.17732	0.13934	0.30083
903	0.77906	0.89421	0.30705	0.13016	0.17383	0.10729	0.15812	0.28979	0.96806	0.30772	0.089857	0.17887	0.21263	0.47342	0.12136	0.1763	0.076945	0.16279	0.095072	0.10501	0.10621	0.1037	0.10916	0.72468	0.07309	0.6034	0.18297	0.11164	0.86437	0.15757	0.76959	0.10095	0.30955	0.53259	0.15726	0.12576	0.07166	0.13415	0.096672	0.28344	0.11043	0.25134	0.88107	0.8928	0.38785	0.63752	0.14482	0.14223	0.34071
904	0.72215	0.87483	0.33126	0.13337	0.18028	0.10981	0.16168	0.31006	0.9086	0.33207	0.092097	0.18354	0.22521	0.59411	0.12424	0.18082	0.07885	0.16657	0.097381	0.10748	0.092487	0.10615	0.11171	0.81678	0.074598	0.54505	0.18792	0.11424	0.89141	0.16244	0.71116	0.10334	0.35271	0.61879	0.1621	0.12879	0.072802	0.13688	0.086034	0.31645	0.095394	0.27367	0.89119	0.86769	0.34224	0.57883	0.11998	0.14519	0.39737
905	0.66369	0.83426	0.36129	0.1367	0.18746	0.11237	0.16539	0.3348	0.84708	0.36231	0.094365	0.18851	0.24046	0.75942	0.12721	0.1856	0.080851	0.17051	0.09972	0.10999	0.083259	0.10863	0.11431	0.87457	0.076314	0.48753	0.1932	0.11691	0.87857	0.1677	0.65479	0.10577	0.41453	0.71672	0.16733	0.13193	0.074255	0.13967	0.079053	0.36221	0.085186	0.30301	0.86727	0.82418	0.29779	0.5208	0.10206	0.14825	0.48055
906	0.60499	0.78312	0.3992	0.14019	0.19557	0.11498	0.16926	0.36554	0.78624	0.40049	0.096661	0.1938	0.25944	0.93039	0.13028	0.19068	0.082922	0.17464	0.10209	0.11255	0.077295	0.11116	0.11698	0.88733	0.078178	0.43103	0.19886	0.11964	0.84165	0.17343	0.60048	0.10825	0.50561	0.80823	0.17303	0.1352	0.075931	0.14253	0.074699	0.42807	0.078518	0.34302	0.82448	0.77163	0.25506	0.46368	0.08967	0.15139	0.60309
907	0.54669	0.72711	0.44761	0.14384	0.20485	0.11766	0.1733	0.40433	0.727	0.44927	0.098986	0.19946	0.28377	1.0223	0.13347	0.1961	0.085045	0.17899	0.1045	0.11517	0.073665	0.11375	0.11971	0.86554	0.080148	0.37581	0.20495	0.12245	0.79242	0.17974	0.54807	0.11077	0.63853	0.86767	0.1793	0.1386	0.077766	0.14546	0.072218	0.52519	0.074385	0.39969	0.77238	0.71501	0.2151	0.40766	0.081422	0.15463	0.76901
908	0.48913	0.66911	0.50957	0.14768	0.21565	0.1204	0.17755	0.45387	0.6697	0.51167	0.10134	0.20556	0.31606	1.0202	0.13678	0.20192	0.087208	0.18357	0.10694	0.11784	0.071703	0.11639	0.12251	0.82416	0.082195	0.32237	0.21155	0.12534	0.73732	0.18674	0.49734	0.11334	0.81034	0.88325	0.18625	0.14216	0.079715	0.14847	0.071076	0.66541	0.072064	0.48255	0.71599	0.6568	0.17932	0.3531	0.076163	0.15799	0.93563
909	0.43255	0.61059	0.58714	0.15174	0.22845	0.12323	0.18202	0.5171	0.61443	0.5897	0.10373	0.21218	0.36052	0.97661	0.14024	0.2082	0.089405	0.18842	0.10943	0.12059	0.070932	0.11909	0.1254	0.77287	0.0843	0.27158	0.21875	0.12833	0.67972	0.19462	0.44802	0.11597	0.9639	0.86396	0.19406	0.14589	0.081747	0.15157	0.070893	0.83904	0.071037	0.60401	0.6579	0.59828	0.14906	0.30062	0.073039	0.16146	1.0207
910	0.37722	0.55232	0.67789	0.15605	0.24397	0.12613	0.18674	0.59576	0.56108	0.68071	0.10616	0.21938	0.42403	0.91931	0.14386	0.21502	0.091631	0.19358	0.11197	0.12341	0.071015	0.12187	0.12838	0.71696	0.086448	0.2248	0.22666	0.13141	0.62132	0.20359	0.39987	0.11866	1.0245	0.82418	0.20295	0.14983	0.083839	0.15476	0.071397	0.98014	0.070936	0.76741	0.59945	0.54012	0.12503	0.25131	0.071438	0.16506	1.0154
911	0.32365	0.49469	0.76932	0.16066	0.26328	0.12913	0.19174	0.68664	0.50945	0.77183	0.10862	0.2273	0.51703	0.8582	0.14766	0.22247	0.093884	0.19908	0.11455	0.12631	0.07171	0.12473	0.13146	0.65915	0.088631	0.18373	0.23543	0.13461	0.56302	0.21398	0.35278	0.12142	1.0062	0.77387	0.21322	0.154	0.085977	0.15805	0.072393	1.0241	0.071499	0.93116	0.5413	0.48266	0.10703	0.20671	0.070926	0.16881	0.97109
912	0.27271	0.43797	0.83901	0.16561	0.28802	0.13223	0.19707	0.77617	0.45928	0.84052	0.11114	0.23607	0.65088	0.79699	0.15168	0.23067	0.096163	0.20499	0.1172	0.12931	0.072842	0.12767	0.13465	0.60083	0.090844	0.14985	0.24522	0.13794	0.50526	0.22622	0.3069	0.12425	0.95763	0.71853	0.22531	0.15844	0.088152	0.16146	0.073742	0.99836	0.072537	1.0158	0.48383	0.42617	0.094173	0.16852	0.071194	0.17272	0.91364
913	0.22578	0.38245	0.86966	0.17096	0.32081	0.13544	0.20278	0.84195	0.41034	0.86993	0.1137	0.24587	0.81927	0.73703	0.15594	0.23978	0.09847	0.21136	0.11991	0.13241	0.074288	0.13071	0.13797	0.54273	0.093084	0.12372	0.25628	0.14141	0.44835	0.24095	0.26277	0.12717	0.89885	0.66105	0.23984	0.1632	0.090357	0.16499	0.075342	0.94736	0.073915	1.0116	0.4273	0.37095	0.085361	0.13791	0.072021	0.17681	0.85257
914	0.18454	0.32861	0.86282	0.1768	0.36584	0.13879	0.20891	0.86854	0.3625	0.86214	0.11631	0.25692	0.96403	0.67883	0.16049	0.24999	0.10081	0.21828	0.12269	0.13563	0.075958	0.13386	0.14144	0.48526	0.09535	0.10473	0.26891	0.14505	0.39255	0.25912	0.2214	0.13019	0.83758	0.6029	0.25773	0.16832	0.092589	0.16865	0.077121	0.88787	0.075537	0.96789	0.37203	0.31756	0.079579	0.11492	0.073249	0.1811	0.79142
915	0.15049	0.27731	0.83095	0.18322	0.42987	0.14229	0.21554	0.85882	0.31586	0.82972	0.11899	0.26954	1.018	0.62254	0.16536	0.26155	0.10317	0.22584	0.12554	0.13898	0.077787	0.13713	0.14507	0.42869	0.097643	0.091544	0.28351	0.14887	0.33832	0.28216	0.18422	0.13331	0.77665	0.54487	0.28037	0.17387	0.094848	0.17246	0.079029	0.82657	0.077331	0.91098	0.31858	0.26695	0.076018	0.098561	0.074763	0.18561	0.73151
916	0.12422	0.22989	0.78529	0.19036	0.52292	0.14595	0.22276	0.82548	0.2709	0.78378	0.12173	0.2841	0.99739	0.56812	0.17062	0.27479	0.10557	0.23415	0.12849	0.14247	0.079729	0.14053	0.14888	0.37335	0.099963	0.082726	0.30061	0.15291	0.28645	0.31233	0.15262	0.13655	0.71709	0.48741	0.30993	0.17995	0.097133	0.17643	0.081028	0.7658	0.079249	0.85002	0.26789	0.22056	0.07407	0.087387	0.07648	0.19036	0.67333
917	0.10512	0.18804	0.7326	0.19838	0.65537	0.1498	0.23066	0.77916	0.22857	0.73094	0.12455	0.30115	0.94889	0.5154	0.17635	0.29015	0.10801	0.24338	0.13153	0.14613	0.081754	0.14409	0.1529	0.3198	0.10231	0.077063	0.32093	0.15719	0.23819	0.35321	0.12744	0.13992	0.65929	0.4308	0.3499	0.18667	0.099444	0.18058	0.083094	0.70648	0.081256	0.78886	0.22139	0.1801	0.073292	0.08003	0.078342	0.1954	0.61703
918	0.09185	0.1533	0.67654	0.20752	0.81975	0.15386	0.23939	0.72616	0.19026	0.67482	0.12745	0.32137	0.88949	0.46416	0.18262	0.30818	0.11049	0.25372	0.13468	0.14998	0.083839	0.14783	0.15717	0.26901	0.1047	0.073656	0.34542	0.16176	0.19518	0.41058	0.10852	0.14344	0.60337	0.37539	0.40585	0.19416	0.10179	0.18493	0.085211	0.64895	0.083328	0.72883	0.1808	0.14698	0.073364	0.075416	0.080309	0.20076	0.56256
919	0.082971	0.12635	0.61911	0.21808	0.95897	0.15818	0.2491	0.67002	0.15742	0.61737	0.13044	0.34572	0.82821	0.41419	0.18958	0.32968	0.11302	0.2654	0.13795	0.15404	0.085969	0.15176	0.16171	0.22237	0.10712	0.071856	0.37537	0.16665	0.15906	0.49325	0.09499	0.14713	0.54924	0.32175	0.48636	0.20263	0.10416	0.18951	0.087365	0.59328	0.085448	0.67048	0.14754	0.12164	0.074052	0.072755	0.08235	0.20648	0.50975
920	0.077269	0.10666	0.56137	0.23052	1.0088	0.16278	0.26002	0.61261	0.13101	0.55963	0.13353	0.37544	0.76716	0.36536	0.19737	0.35566	0.1156	0.27875	0.14136	0.15835	0.088135	0.15592	0.16658	0.18163	0.10957	0.071204	0.41245	0.17194	0.1307	0.61188	0.085697	0.15101	0.49672	0.27081	0.60215	0.21233	0.10656	0.19433	0.089551	0.53936	0.087605	0.61396	0.12206	0.10333	0.075187	0.071488	0.084447	0.21262	0.45839
921	0.073836	0.092947	0.50391	0.24547	0.98956	0.16771	0.27241	0.55493	0.11103	0.50219	0.13674	0.41216	0.70746	0.31782	0.2062	0.38749	0.11823	0.2942	0.14492	0.16294	0.09033	0.16035	0.17184	0.14821	0.11208	0.071372	0.45867	0.17768	0.10979	0.76724	0.079579	0.1551	0.44559	0.22398	0.7555	0.22362	0.10901	0.19944	0.091764	0.487	0.089794	0.55923	0.10364	0.090678	0.076646	0.071216	0.086586	0.21925	0.40828
922	0.072018	0.083741	0.44711	0.26387	0.94206	0.17304	0.28663	0.49756	0.096654	0.44542	0.14008	0.45783	0.64949	0.27205	0.21636	0.42688	0.12093	0.31229	0.14865	0.16787	0.092552	0.16507	0.17755	0.12257	0.11462	0.072127	0.51604	0.18398	0.095104	0.91973	0.075783	0.15946	0.39567	0.183	0.91057	0.23702	0.1115	0.20486	0.094003	0.43599	0.092008	0.50613	0.090901	0.082253	0.078341	0.071657	0.088759	0.22643	0.35934
923	0.071353	0.077807	0.39132	0.28712	0.8833	0.17884	0.30314	0.44087	0.086734	0.38967	0.14355	0.51438	0.59332	0.22904	0.22825	0.47582	0.12369	0.33377	0.15258	0.1732	0.094798	0.17016	0.18381	0.10403	0.11723	0.073303	0.5854	0.19096	0.085187	0.99817	0.073672	0.1641	0.34695	0.14931	0.99568	0.25326	0.11403	0.21065	0.096265	0.38618	0.094248	0.45446	0.082415	0.076878	0.080211	0.072607	0.090959	0.23428	0.31174
924	0.071512	0.07421	0.33707	0.31743	0.82235	0.18521	0.32257	0.38523	0.080161	0.33547	0.14719	0.58264	0.53887	0.19021	0.24245	0.53599	0.12653	0.3596	0.15673	0.17898	0.097069	0.17566	0.19073	0.091202	0.11989	0.074778	0.66385	0.19876	0.078743	0.99514	0.072779	0.16908	0.29968	0.12342	0.99691	0.27344	0.11662	0.21685	0.098554	0.3376	0.096513	0.40403	0.076998	0.073679	0.082209	0.073922	0.093185	0.2429	0.26606
925	0.072261	0.072276	0.2852	0.35824	0.76134	0.19225	0.34571	0.33119	0.076039	0.28369	0.15101	0.65988	0.48597	0.15705	0.25976	0.60734	0.12945	0.39105	0.16114	0.18533	0.099365	0.18166	0.19846	0.08265	0.12261	0.076466	0.74147	0.20761	0.074783	0.95466	0.072768	0.17446	0.25458	0.10466	0.95816	0.29925	0.11926	0.22352	0.10087	0.2906	0.098802	0.35481	0.073769	0.072029	0.084306	0.075496	0.095435	0.25245	0.22336
926	0.073432	0.071529	0.23702	0.415	0.70158	0.20015	0.37363	0.27965	0.073694	0.23564	0.15504	0.73663	0.43442	0.13047	0.28144	0.6852	0.13247	0.42967	0.16586	0.19236	0.10169	0.18827	0.20721	0.077187	0.12541	0.078306	0.80196	0.21777	0.072592	0.8984	0.073396	0.18032	0.21283	0.091669	0.90255	0.33328	0.12196	0.23075	0.10321	0.24597	0.10112	0.30701	0.072098	0.071485	0.086479	0.077254	0.09771	0.26312	0.18511
927	0.074903	0.07163	0.19419	0.49584	0.64342	0.20909	0.40766	0.23198	0.072634	0.19301	0.15931	0.79717	0.38409	0.11044	0.30937	0.7578	0.13559	0.4772	0.17092	0.20022	0.10404	0.19562	0.21726	0.073927	0.12829	0.080255	0.83197	0.22965	0.07166	0.83794	0.074487	0.18675	0.17595	0.083	0.84221	0.37966	0.12473	0.23862	0.10559	0.205	0.10346	0.26127	0.071538	0.07173	0.088716	0.079145	0.10001	0.27515	0.15275
928	0.076588	0.072337	0.15834	0.61019	0.58698	0.21939	0.4494	0.18986	0.072502	0.15739	0.16385	0.82818	0.33505	0.096082	0.34652	0.80917	0.13882	0.53503	0.17639	0.20913	0.10643	0.20388	0.22897	0.072234	0.13125	0.082281	0.83041	0.2438	0.07163	0.77682	0.075912	0.19388	0.14529	0.077454	0.78109	0.44479	0.12758	0.24724	0.108	0.16923	0.10584	0.21874	0.071773	0.072541	0.091007	0.081129	0.10234	0.28884	0.12708
929	0.078425	0.073477	0.13028	0.75816	0.53219	0.23142	0.50042	0.15486	0.073043	0.12956	0.16871	0.82798	0.28769	0.086205	0.39753	0.8294	0.14218	0.60288	0.18236	0.21937	0.10885	0.21329	0.2429	0.071659	0.13431	0.084364	0.80527	0.26102	0.072243	0.71655	0.07758	0.20186	0.12138	0.074135	0.72072	0.53758	0.13052	0.25676	0.11045	0.13989	0.10825	0.1809	0.072576	0.073755	0.093347	0.083181	0.1047	0.30458	0.10791
930	0.080371	0.074926	0.10965	0.90421	0.47889	0.24577	0.56152	0.12768	0.07407	0.10913	0.17395	0.80404	0.24286	0.07968	0.46947	0.82056	0.14569	0.67641	0.18891	0.23134	0.11131	0.22417	0.2598	0.071883	0.13748	0.08649	0.76538	0.28252	0.073316	0.65775	0.079426	0.21091	0.10378	0.072401	0.66181	0.66571	0.13354	0.26735	0.11294	0.1173	0.1107	0.14919	0.073784	0.075257	0.095736	0.085283	0.10709	0.3229	0.094275
931	0.082394	0.076595	0.095195	0.98366	0.42691	0.26324	0.63103	0.10781	0.075448	0.094842	0.17963	0.76506	0.20192	0.0756	0.57143	0.79107	0.14936	0.74514	0.19618	0.24558	0.11381	0.23697	0.28084	0.072678	0.14077	0.08865	0.71707	0.31011	0.074717	0.6006	0.081403	0.22133	0.091394	0.071798	0.60454	0.81852	0.13667	0.27922	0.11547	0.10084	0.1132	0.12426	0.075282	0.076963	0.098172	0.087424	0.10952	0.34445	0.084951
932	0.084475	0.07842	0.085455	0.98477	0.37618	0.28507	0.7024	0.093957	0.077082	0.085222	0.18583	0.71739	0.16641	0.07329	0.70809	0.74891	0.15322	0.7949	0.20434	0.26291	0.11637	0.25234	0.30775	0.073881	0.14419	0.090837	0.66425	0.34663	0.076351	0.54509	0.083478	0.23352	0.083018	0.072001	0.54891	0.94388	0.13992	0.29265	0.11806	0.089362	0.11574	0.10579	0.076985	0.078815	0.10066	0.089595	0.11198	0.37006	0.078836
933	0.086598	0.080356	0.079146	0.94699	0.32682	0.31311	0.76353	0.084661	0.078901	0.078999	0.19267	0.66499	0.13749	0.072257	0.85834	0.69956	0.15729	0.81623	0.21361	0.28451	0.11897	0.2712	0.34323	0.075374	0.14777	0.093049	0.60914	0.3965	0.078152	0.49109	0.08563	0.24805	0.077597	0.072781	0.4948	0.98895	0.1433	0.30799	0.1207	0.081663	0.11833	0.092738	0.078835	0.08077	0.1032	0.091792	0.11449	0.40078	0.075057
934	0.088754	0.082373	0.075286	0.8924	0.27934	0.35023	0.80165	0.078671	0.080856	0.075201	0.20029	0.61019	0.11539	0.072147	0.96255	0.64635	0.16159	0.80995	0.2243	0.3122	0.12163	0.29497	0.39148	0.077073	0.15151	0.095284	0.55306	0.46636	0.08007	0.43844	0.087843	0.26575	0.07432	0.073973	0.44206	0.97082	0.14682	0.32567	0.12341	0.076736	0.12097	0.083866	0.080788	0.0828	0.1058	0.094014	0.11705	0.43784	0.072964
935	0.090938	0.084447	0.073169	0.83253	0.23472	0.40089	0.81144	0.07504	0.082913	0.073128	0.20888	0.55431	0.09939	0.072702	0.98547	0.59121	0.16618	0.78318	0.23682	0.34879	0.12436	0.32578	0.45886	0.07892	0.15545	0.097543	0.49677	0.56479	0.082073	0.38705	0.090107	0.28786	0.07259	0.075458	0.39057	0.92497	0.1505	0.34626	0.12619	0.073816	0.12368	0.078087	0.082816	0.084885	0.10846	0.096258	0.11967	0.48244	0.072089
936	0.093147	0.086565	0.072293	0.77161	0.19439	0.47175	0.79666	0.073085	0.085048	0.072283	0.21868	0.49815	0.088287	0.073739	0.95741	0.53526	0.17108	0.74334	0.25178	0.3986	0.12716	0.36696	0.55371	0.080871	0.15961	0.099825	0.4408	0.69662	0.084138	0.33702	0.092419	0.31625	0.071977	0.077152	0.34043	0.8675	0.15437	0.37045	0.12904	0.072344	0.12646	0.074553	0.0849	0.08701	0.1112	0.098526	0.12234	0.53534	0.072092
937	0.095379	0.088716	0.072302	0.7112	0.15989	0.57119	0.76468	0.072324	0.087246	0.072314	0.23004	0.44227	0.080876	0.075124	0.90729	0.47922	0.17636	0.6958	0.27004	0.4681	0.13003	0.42362	0.6817	0.082897	0.16403	0.10213	0.38564	0.84374	0.086247	0.28877	0.094775	0.3538	0.07217	0.078993	0.29203	0.80708	0.15845	0.39909	0.13197	0.071917	0.12931	0.07264	0.087024	0.089168	0.11402	0.10082	0.12507	0.59574	0.07273
938	0.097633	0.090895	0.072943	0.65208	0.13224	0.70316	0.72197	0.072416	0.089495	0.072971	0.24344	0.38716	0.076165	0.076761	0.84867	0.4236	0.18208	0.64395	0.2929	0.56554	0.13299	0.50305	0.82827	0.084978	0.16873	0.10447	0.33195	0.95094	0.088393	0.2432	0.097174	0.40496	0.072945	0.080941	0.24623	0.74623	0.16277	0.43312	0.135	0.072245	0.13225	0.071894	0.08918	0.091353	0.11692	0.10314	0.12788	0.65975	0.073826
939	0.099911	0.093099	0.074035	0.59446	0.1114	0.84797	0.673	0.073116	0.09179	0.074074	0.25957	0.33347	0.073405	0.07858	0.78803	0.36892	0.18833	0.58982	0.32231	0.69529	0.13605	0.61311	0.94166	0.0871	0.17378	0.10684	0.28067	0.97985	0.090566	0.2017	0.099619	0.47628	0.07414	0.082964	0.2044	0.68627	0.16737	0.47346	0.13812	0.073117	0.13528	0.071992	0.091364	0.093561	0.11993	0.10548	0.13077	0.71924	0.075254
940	0.10221	0.095326	0.075448	0.53838	0.096491	0.95076	0.62054	0.07425	0.094128	0.075496	0.27941	0.28215	0.072049	0.080533	0.72736	0.31594	0.19521	0.53464	0.36128	0.83961	0.13921	0.75235	0.97832	0.089255	0.17922	0.10924	0.2332	0.95533	0.092764	0.16584	0.10211	0.57577	0.075638	0.085042	0.1681	0.62768	0.17228	0.52067	0.14137	0.074382	0.13842	0.072698	0.093571	0.095793	0.12305	0.10786	0.13374	0.76358	0.076921
941	0.10455	0.097575	0.07709	0.48372	0.086243	0.97653	0.56627	0.075693	0.096508	0.077143	0.30445	0.2346	0.071707	0.082585	0.66773	0.26574	0.20287	0.47917	0.41437	0.94545	0.14249	0.88843	0.95783	0.091436	0.18513	0.11167	0.19126	0.90712	0.094986	0.13677	0.10466	0.70662	0.077357	0.087162	0.13854	0.57059	0.17757	0.5742	0.14474	0.075931	0.14166	0.073843	0.095801	0.098047	0.1263	0.11028	0.13681	0.785	0.078761
942	0.10691	0.099847	0.078894	0.4304	0.079473	0.95097	0.5112	0.077356	0.098932	0.078951	0.33696	0.19251	0.072095	0.084713	0.60949	0.21985	0.21149	0.42398	0.48822	0.97521	0.1459	0.96502	0.91151	0.093641	0.19161	0.11415	0.15638	0.8493	0.097229	0.11466	0.10726	0.84834	0.079235	0.089314	0.11596	0.51499	0.1833	0.63132	0.14825	0.077686	0.14504	0.075305	0.098054	0.10032	0.1297	0.11273	0.13998	0.78273	0.080729
943	0.1093	0.10214	0.080813	0.37836	0.075231	0.90244	0.45602	0.079174	0.1014	0.080873	0.38038	0.15743	0.073011	0.0869	0.55274	0.17998	0.22131	0.36963	0.59042	0.95174	0.14946	0.96936	0.85439	0.095869	0.19876	0.11668	0.12926	0.78894	0.099496	0.098715	0.10993	0.94754	0.08123	0.091493	0.099637	0.46077	0.18956	0.68619	0.15192	0.07959	0.14856	0.076996	0.10033	0.10263	0.13326	0.11523	0.14328	0.76131	0.082792
944	0.11173	0.10447	0.082814	0.32781	0.072811	0.84466	0.40129	0.081104	0.10392	0.082876	0.43991	0.13011	0.074308	0.089137	0.49743	0.1475	0.23267	0.3169	0.72216	0.90425	0.15318	0.93431	0.79422	0.098119	0.20674	0.11925	0.10941	0.72828	0.10179	0.087695	0.11267	0.9718	0.083312	0.093695	0.088319	0.40784	0.19644	0.73057	0.15577	0.081604	0.15223	0.078854	0.10263	0.10496	0.13702	0.11777	0.1467	0.72659	0.084927
945	0.1142	0.10682	0.084876	0.27929	0.071702	0.78435	0.34765	0.083113	0.10649	0.084939	0.52257	0.11008	0.075878	0.091418	0.44346	0.12273	0.24602	0.26688	0.85934	0.84686	0.15709	0.88172	0.73354	0.10039	0.21576	0.12187	0.095573	0.6685	0.1041	0.080364	0.11549	0.94613	0.085462	0.09592	0.08077	0.35625	0.20409	0.75702	0.15982	0.083701	0.15609	0.080833	0.10496	0.10732	0.141	0.12036	0.15028	0.68338	0.087119
946	0.11671	0.10921	0.086981	0.23387	0.071539	0.72375	0.29601	0.085179	0.10913	0.087046	0.63474	0.096086	0.077648	0.093739	0.39078	0.10489	0.26203	0.2211	0.94899	0.78668	0.16121	0.82283	0.67364	0.10269	0.22608	0.12456	0.086288	0.61001	0.10645	0.075721	0.11839	0.8978	0.087667	0.098168	0.075969	0.30636	0.21269	0.76261	0.16411	0.085862	0.16015	0.082902	0.10732	0.10971	0.14524	0.12301	0.15402	0.63502	0.089359
947	0.11928	0.11163	0.089122	0.19302	0.072057	0.664	0.24764	0.087289	0.11183	0.089187	0.77093	0.086691	0.079561	0.096099	0.33953	0.092604	0.28163	0.18128	0.96622	0.72608	0.16557	0.76231	0.61498	0.10501	0.23806	0.12731	0.08031	0.55296	0.10883	0.073014	0.1214	0.84027	0.089917	0.10044	0.073149	0.25892	0.22247	0.74937	0.16866	0.088074	0.16444	0.085041	0.10971	0.11214	0.14979	0.12572	0.15795	0.58367	0.091641
948	0.12189	0.11409	0.091289	0.15832	0.073065	0.60552	0.2042	0.089432	0.1146	0.091356	0.89529	0.080634	0.08158	0.098501	0.2902	0.084455	0.30622	0.14876	0.93774	0.66626	0.17021	0.70193	0.55772	0.10737	0.25223	0.13013	0.076693	0.4973	0.11124	0.0717	0.12452	0.7801	0.092208	0.10273	0.071753	0.21521	0.23375	0.72174	0.17352	0.090331	0.169	0.087235	0.11213	0.11461	0.1547	0.12849	0.16209	0.53067	0.093962
949	0.12456	0.11659	0.093482	0.13071	0.074428	0.54843	0.16732	0.091602	0.11746	0.093549	0.95814	0.076962	0.083679	0.10094	0.24372	0.079291	0.3379	0.12392	0.8884	0.60768	0.17517	0.64256	0.50187	0.10976	0.2693	0.13303	0.074754	0.44297	0.11369	0.071389	0.12776	0.71956	0.094538	0.10505	0.071383	0.17684	0.24699	0.6842	0.17873	0.092628	0.17387	0.089475	0.1146	0.11712	0.16005	0.13134	0.16648	0.47694	0.096323
950	0.1273	0.11914	0.095696	0.11006	0.076046	0.49273	0.13802	0.093796	0.12041	0.095764	0.95586	0.074983	0.085839	0.10343	0.20154	0.076253	0.37984	0.10599	0.83071	0.55047	0.1805	0.58449	0.44733	0.11218	0.29035	0.13602	0.074006	0.38994	0.11618	0.0718	0.13115	0.65982	0.096906	0.10741	0.071752	0.14517	0.26281	0.64021	0.18436	0.094964	0.1791	0.091755	0.11711	0.11968	0.16592	0.13428	0.17114	0.42314	0.098723
951	0.13011	0.12174	0.097932	0.095369	0.077848	0.43834	0.11617	0.096012	0.12347	0.098001	0.91862	0.074209	0.088049	0.10598	0.16524	0.074726	0.43672	0.093627	0.77058	0.49464	0.18627	0.5278	0.3941	0.11464	0.31693	0.1391	0.074108	0.33838	0.11872	0.072733	0.13471	0.60129	0.099315	0.10979	0.072653	0.12069	0.28212	0.59218	0.19049	0.097338	0.18474	0.094074	0.11967	0.12229	0.17245	0.1373	0.17613	0.36993	0.10117
952	0.13299	0.1244	0.10019	0.085335	0.079784	0.38526	0.10071	0.09825	0.12664	0.10026	0.86585	0.074291	0.090302	0.10857	0.13597	0.074274	0.51482	0.085422	0.71016	0.44012	0.19256	0.47246	0.34232	0.11714	0.35141	0.14229	0.074815	0.28879	0.12131	0.07404	0.13845	0.54411	0.10177	0.1122	0.073939	0.10282	0.30625	0.54173	0.19721	0.099752	0.19088	0.09643	0.12227	0.12496	0.17979	0.14042	0.1815	0.31814	0.10365
953	0.13596	0.12712	0.10247	0.078743	0.081817	0.33368	0.090216	0.10051	0.12995	0.10254	0.80728	0.074984	0.092593	0.11123	0.11383	0.074585	0.61986	0.08022	0.65051	0.3869	0.19947	0.41841	0.29247	0.11969	0.3973	0.1456	0.075952	0.24218	0.12395	0.075617	0.14241	0.48829	0.10426	0.11466	0.0755	0.090361	0.33716	0.48994	0.20465	0.10221	0.19762	0.098826	0.12494	0.12769	0.18815	0.14366	0.1873	0.26889	0.10619
954	0.13902	0.1299	0.10478	0.074639	0.083925	0.28419	0.083368	0.1028	0.13341	0.10485	0.74705	0.07611	0.09492	0.11396	0.097959	0.07544	0.74802	0.077155	0.59205	0.3352	0.20714	0.36572	0.24552	0.12229	0.45967	0.14904	0.077395	0.19998	0.12665	0.077389	0.14663	0.43376	0.10681	0.11716	0.07726	0.081993	0.37783	0.4376	0.21295	0.10471	0.20507	0.10126	0.12767	0.1305	0.19786	0.14701	0.19363	0.22369	0.10879
955	0.14218	0.13276	0.10712	0.072324	0.08609	0.23781	0.079134	0.10511	0.13704	0.10719	0.68691	0.077545	0.097285	0.11676	0.087039	0.076681	0.87044	0.075609	0.53491	0.28555	0.21574	0.31471	0.20288	0.12495	0.54481	0.15262	0.079054	0.16381	0.12942	0.079301	0.15114	0.38055	0.10942	0.1197	0.079164	0.076611	0.4326	0.38542	0.22235	0.10727	0.21339	0.10374	0.13046	0.13337	0.20934	0.1505	0.20059	0.18423	0.11144
956	0.14546	0.13571	0.10948	0.071293	0.088301	0.19605	0.076757	0.10744	0.14087	0.10956	0.62765	0.079199	0.099689	0.11965	0.079806	0.078198	0.94197	0.075142	0.47908	0.239	0.22549	0.26614	0.16619	0.12767	0.65663	0.15637	0.080868	0.13476	0.13226	0.081317	0.156	0.32891	0.11209	0.1223	0.081173	0.073378	0.5073	0.33419	0.23311	0.10988	0.2228	0.10627	0.13334	0.13634	0.22325	0.15415	0.20831	0.15185	0.11416
957	0.14887	0.13874	0.11188	0.071186	0.090553	0.1605	0.075702	0.10981	0.14494	0.11196	0.5696	0.081009	0.10213	0.12263	0.075245	0.07991	0.94897	0.075444	0.42454	0.19705	0.2367	0.22124	0.13658	0.13046	0.78497	0.16031	0.082791	0.11288	0.13518	0.083409	0.16128	0.27946	0.11482	0.12495	0.083261	0.071689	0.60743	0.28494	0.24562	0.11256	0.23358	0.10886	0.13629	0.13939	0.24056	0.15796	0.21697	0.12696	0.11696
958	0.15241	0.14187	0.11432	0.071745	0.09284	0.13215	0.075583	0.11221	0.14927	0.11439	0.51283	0.082929	0.10462	0.12573	0.072602	0.081761	0.91563	0.076292	0.37135	0.16129	0.2498	0.18162	0.11419	0.13332	0.89445	0.16445	0.084793	0.097243	0.13819	0.085561	0.16706	0.23331	0.11764	0.12766	0.085409	0.071108	0.73051	0.23908	0.26042	0.1153	0.24612	0.1115	0.13934	0.14254	0.2628	0.16197	0.22678	0.10892	0.11985
959	0.15612	0.14511	0.11679	0.072782	0.095163	0.11095	0.076132	0.11465	0.15391	0.11687	0.45734	0.084928	0.10716	0.12894	0.071337	0.08371	0.86567	0.077527	0.31983	0.13275	0.26536	0.14872	0.098151	0.13626	0.94592	0.16883	0.086852	0.086519	0.14129	0.087759	0.17347	0.192	0.12054	0.13043	0.087604	0.071326	0.85212	0.19822	0.27826	0.11813	0.26094	0.11421	0.14248	0.14581	0.2925	0.1662	0.23808	0.096443	0.12283
960	0.16	0.14848	0.11931	0.074164	0.097522	0.095878	0.077155	0.11713	0.15893	0.11939	0.40313	0.086985	0.10976	0.13229	0.071061	0.08573	0.80865	0.079039	0.27069	0.11137	0.28423	0.12317	0.087119	0.13929	0.93821	0.17349	0.088954	0.079433	0.14451	0.089998	0.18064	0.15709	0.12354	0.13328	0.08984	0.072117	0.92965	0.16388	0.30022	0.12104	0.2788	0.117	0.14574	0.14921	0.33383	0.17068	0.25126	0.08814	0.12591
961	0.16408	0.15198	0.12188	0.075793	0.099918	0.085583	0.078515	0.11966	0.1644	0.12196	0.35037	0.089085	0.11241	0.1358	0.071498	0.087803	0.74898	0.080746	0.22515	0.096161	0.30759	0.10447	0.079811	0.14242	0.89924	0.17845	0.091089	0.07498	0.14784	0.092272	0.18877	0.1295	0.12664	0.13621	0.092112	0.073322	0.94404	0.13682	0.3279	0.12405	0.30078	0.11987	0.14912	0.15274	0.39403	0.17544	0.26693	0.082865	0.12912
962	0.16839	0.15563	0.1245	0.0776	0.10235	0.078814	0.080115	0.12223	0.17041	0.12458	0.29953	0.09122	0.11513	0.13949	0.072447	0.089915	0.68897	0.082592	0.18483	0.085763	0.33723	0.091391	0.075201	0.14566	0.84659	0.18378	0.093252	0.072418	0.1513	0.094581	0.19816	0.10899	0.12987	0.13923	0.094419	0.074824	0.91609	0.11676	0.36365	0.12717	0.32847	0.12283	0.15264	0.15642	0.48521	0.18053	0.28591	0.079751	0.13246
963	0.17296	0.15945	0.12718	0.079536	0.10483	0.074592	0.081884	0.12485	0.17709	0.12726	0.25154	0.093381	0.11793	0.14338	0.073766	0.092059	0.62957	0.084538	0.15121	0.078923	0.37574	0.082586	0.072526	0.14902	0.78842	0.18954	0.095439	0.071212	0.15491	0.096925	0.20917	0.094494	0.13324	0.14234	0.09676	0.076539	0.86817	0.10262	0.41089	0.13041	0.36421	0.12589	0.15632	0.16029	0.62399	0.18601	0.3094	0.078173	0.13596
964	0.17783	0.16347	0.12992	0.081567	0.10736	0.072196	0.083775	0.12753	0.18459	0.13	0.20784	0.095567	0.12081	0.14751	0.075349	0.094228	0.57121	0.086555	0.12498	0.07465	0.42688	0.076901	0.071239	0.15252	0.72854	0.19579	0.097648	0.07098	0.15868	0.099304	0.22239	0.084636	0.13677	0.14557	0.099136	0.078409	0.81189	0.093067	0.47437	0.1338	0.4114	0.12907	0.16016	0.16434	0.81312	0.19193	0.33918	0.077686	0.13963
965	0.18304	0.1677	0.13273	0.083667	0.10994	0.071109	0.085752	0.13028	0.19315	0.13281	0.17005	0.097775	0.12379	0.15192	0.077123	0.096422	0.51402	0.088625	0.10571	0.072218	0.49566	0.073456	0.070949	0.15616	0.66863	0.20264	0.099879	0.071448	0.16264	0.10172	0.23866	0.07819	0.14048	0.14891	0.10155	0.080389	0.75259	0.086886	0.55942	0.13734	0.47473	0.13239	0.1642	0.16862	0.98905	0.19839	0.37781	0.077972	0.1435
966	0.18866	0.17217	0.13561	0.085821	0.11258	0.070963	0.087792	0.13309	0.20307	0.1357	0.13942	0.10001	0.12687	0.15665	0.079034	0.098637	0.45805	0.090735	0.092209	0.071106	0.58706	0.071618	0.071376	0.15998	0.60946	0.21021	0.10213	0.072421	0.1668	0.10418	0.25929	0.074201	0.14439	0.15238	0.10401	0.082452	0.69263	0.083126	0.66801	0.14107	0.55945	0.13585	0.16846	0.17316	1.0564	0.20548	0.429	0.078807	0.14761
967	0.19474	0.17693	0.13858	0.088019	0.11528	0.071494	0.089879	0.13598	0.21478	0.13867	0.11616	0.10226	0.13007	0.16176	0.081044	0.10087	0.40335	0.092876	0.083099	0.070941	0.70061	0.070932	0.072319	0.16398	0.55134	0.21866	0.10441	0.073755	0.1712	0.10668	0.28637	0.071972	0.14855	0.156	0.10651	0.084577	0.63311	0.081089	0.78828	0.14501	0.66755	0.13948	0.17296	0.17798	1.0332	0.21334	0.49764	0.080033	0.152
968	0.20138	0.18201	0.14163	0.090253	0.11806	0.07251	0.092002	0.13895	0.22894	0.14173	0.099448	0.10453	0.1334	0.16734	0.083129	0.10313	0.35011	0.095045	0.077198	0.071458	0.81824	0.071074	0.073631	0.16819	0.4944	0.22818	0.10671	0.075349	0.17587	0.10924	0.32333	0.071007	0.15298	0.15978	0.10906	0.086749	0.57451	0.080277	0.88591	0.14919	0.78704	0.14331	0.17775	0.18314	0.98163	0.22214	0.58851	0.081536	0.1567
969	0.20869	0.18746	0.14479	0.092521	0.12092	0.073877	0.094155	0.14202	0.24651	0.14489	0.087931	0.10684	0.13688	0.17348	0.085269	0.10542	0.29887	0.097237	0.073602	0.072465	0.90263	0.071812	0.07521	0.17265	0.43867	0.23906	0.10904	0.07713	0.18085	0.11185	0.376	0.070948	0.15774	0.16374	0.11166	0.088962	0.51703	0.080332	0.92883	0.15366	0.88427	0.14737	0.18287	0.18868	0.92125	0.23211	0.70071	0.083235	0.16177
970	0.21681	0.19335	0.14806	0.094821	0.12386	0.075493	0.096333	0.14518	0.26898	0.14816	0.080287	0.10916	0.14054	0.1803	0.087454	0.10773	0.25058	0.099451	0.071657	0.073825	0.92969	0.072978	0.076979	0.17738	0.38426	0.25165	0.1114	0.079045	0.18619	0.11452	0.45407	0.071542	0.16289	0.16791	0.11433	0.091209	0.46073	0.081004	0.92015	0.15846	0.92732	0.15168	0.18837	0.19468	0.8596	0.24354	0.81643	0.085074	0.1673
971	0.22591	0.19976	0.15145	0.097153	0.12691	0.077289	0.098534	0.14845	0.29878	0.15155	0.075442	0.11152	0.1444	0.18797	0.089677	0.11007	0.20672	0.10169	0.070895	0.075436	0.91098	0.07445	0.078885	0.18243	0.33148	0.26646	0.11379	0.081057	0.19194	0.11726	0.57195	0.072604	0.1685	0.17232	0.11706	0.093488	0.40569	0.082112	0.88213	0.16365	0.91898	0.15631	0.19432	0.20121	0.79897	0.25684	0.89936	0.087013	0.17337
972	0.23625	0.20679	0.15497	0.099518	0.13008	0.079215	0.10076	0.15185	0.33989	0.15508	0.072604	0.11391	0.14848	0.19673	0.091932	0.11244	0.16893	0.10395	0.070983	0.077228	0.86829	0.076143	0.080891	0.18784	0.281	0.2842	0.11622	0.083141	0.19818	0.12007	0.73998	0.074002	0.17468	0.17699	0.11987	0.095799	0.35212	0.08353	0.8306	0.16932	0.88129	0.16129	0.20079	0.20839	0.7402	0.27257	0.92611	0.089025	0.18011
973	0.24814	0.21455	0.15864	0.10192	0.13337	0.081235	0.10301	0.15538	0.39903	0.15876	0.071203	0.11634	0.15283	0.20689	0.094218	0.11484	0.13843	0.10623	0.071681	0.079151	0.81475	0.077994	0.08297	0.19368	0.234	0.30585	0.11869	0.08528	0.20501	0.12298	0.92464	0.075641	0.18155	0.18197	0.12277	0.098142	0.30054	0.085168	0.77336	0.17556	0.82995	0.1667	0.20788	0.21633	0.68358	0.29153	0.90777	0.091092	0.18768
974	0.26202	0.22322	0.16249	0.10436	0.1368	0.083324	0.10528	0.15906	0.48709	0.1626	0.070831	0.1188	0.15749	0.2189	0.096536	0.11728	0.11536	0.10854	0.072818	0.081168	0.75678	0.079958	0.085105	0.20003	0.19208	0.33285	0.1212	0.087462	0.21252	0.12597	1.0328	0.077452	0.18928	0.18731	0.12576	0.10052	0.25194	0.086963	0.71411	0.1825	0.77285	0.17263	0.21573	0.22522	0.62918	0.31482	0.86551	0.093199	0.1963
975	0.2785	0.23299	0.16652	0.10684	0.1404	0.085466	0.10757	0.16292	0.61852	0.16664	0.071199	0.12131	0.16251	0.23342	0.098886	0.11976	0.098847	0.11088	0.07427	0.083255	0.69736	0.082006	0.087283	0.20697	0.15681	0.36724	0.12375	0.089681	0.22089	0.12908	1.0363	0.079389	0.1981	0.19305	0.12885	0.10293	0.20777	0.088871	0.65456	0.19032	0.71366	0.17918	0.22449	0.23528	0.57686	0.34406	0.8123	0.09534	0.20628
976	0.2984	0.24416	0.17076	0.10937	0.14419	0.08765	0.10989	0.16696	0.79604	0.17089	0.072099	0.12386	0.16797	0.25144	0.10127	0.12228	0.087499	0.11325	0.075947	0.085395	0.63792	0.084116	0.089497	0.21463	0.12906	0.41193	0.12635	0.091931	0.23028	0.1323	0.994	0.081415	0.20833	0.19928	0.13207	0.10539	0.16971	0.09086	0.59554	0.19926	0.65414	0.18652	0.23439	0.24679	0.52642	0.38154	0.75455	0.097509	0.21803
977	0.32294	0.25708	0.17524	0.11196	0.14819	0.089869	0.11225	0.17121	0.9652	0.17538	0.073381	0.12647	0.17394	0.27449	0.10369	0.12485	0.079987	0.11565	0.077785	0.087577	0.57912	0.086273	0.091744	0.22316	0.10854	0.47082	0.12901	0.094212	0.24096	0.13566	0.9357	0.083508	0.22043	0.20607	0.13541	0.10788	0.13898	0.09291	0.53741	0.20964	0.59512	0.19483	0.2457	0.26017	0.47758	0.4305	0.69525	0.099703	0.23219
978	0.35384	0.27228	0.18	0.1146	0.15245	0.09212	0.11463	0.1757	1.0361	0.18014	0.074935	0.12912	0.18056	0.30502	0.10615	0.12747	0.075243	0.11809	0.07974	0.089794	0.52125	0.08847	0.094021	0.23276	0.094096	0.54819	0.13173	0.096523	0.25326	0.13917	0.87427	0.085653	0.23505	0.21355	0.13891	0.11043	0.11573	0.095007	0.48033	0.22193	0.53698	0.2044	0.25881	0.27595	0.43003	0.49506	0.63587	0.10192	0.24968
979	0.39352	0.29045	0.18507	0.11731	0.15699	0.0944	0.11705	0.18047	1.0214	0.18522	0.076686	0.13184	0.18797	0.34704	0.10866	0.13014	0.072481	0.12057	0.081779	0.092042	0.46447	0.090699	0.096327	0.24368	0.084307	0.64578	0.13452	0.098865	0.26763	0.14286	0.81291	0.087838	0.25319	0.22186	0.14259	0.11303	0.099084	0.097141	0.42442	0.23682	0.47988	0.2156	0.27423	0.2949	0.38353	0.57908	0.57708	0.10416	0.27193
980	0.44533	0.31259	0.1905	0.12008	0.16187	0.09671	0.1195	0.18556	0.97356	0.19066	0.078576	0.13462	0.19636	0.40724	0.11122	0.13288	0.071136	0.12309	0.083881	0.09432	0.40889	0.092959	0.098665	0.25628	0.07793	0.75503	0.13737	0.10124	0.28471	0.14674	0.75305	0.090057	0.27638	0.23117	0.14645	0.11569	0.087645	0.099306	0.36987	0.25532	0.42394	0.229	0.29269	0.3181	0.33802	0.68185	0.51919	0.10643	0.30122
981	0.51329	0.34012	0.19635	0.12294	0.16716	0.099051	0.122	0.191	0.91394	0.19653	0.080568	0.13747	0.20603	0.4962	0.11383	0.13568	0.070806	0.12566	0.086032	0.096627	0.35476	0.095248	0.10103	0.27103	0.074003	0.85002	0.1403	0.10365	0.30536	0.15085	0.69514	0.092306	0.30706	0.24172	0.15055	0.11842	0.080075	0.1015	0.31714	0.27903	0.36937	0.24539	0.31522	0.34706	0.2937	0.78925	0.46237	0.10872	0.34126
982	0.60048	0.37502	0.20269	0.12589	0.17292	0.10143	0.12454	0.19687	0.85236	0.20289	0.082634	0.1404	0.21735	0.62702	0.1165	0.13856	0.071205	0.12828	0.08822	0.098965	0.30265	0.097566	0.10344	0.28858	0.071824	0.90136	0.14332	0.1061	0.33084	0.15523	0.63932	0.094585	0.34924	0.25385	0.15491	0.12122	0.075293	0.10372	0.26708	0.31048	0.31662	0.26604	0.34324	0.38395	0.25118	0.87174	0.40674	0.11104	0.39818
983	0.70394	0.42008	0.20962	0.12893	0.17927	0.10384	0.12713	0.20324	0.79133	0.20984	0.084756	0.14341	0.23089	0.79945	0.11925	0.14151	0.072126	0.13096	0.090441	0.10134	0.25355	0.099916	0.10589	0.30984	0.070895	0.90356	0.14643	0.1086	0.36288	0.15992	0.58553	0.096892	0.40946	0.26797	0.15957	0.12411	0.072503	0.10596	0.22104	0.3538	0.26656	0.29286	0.37879	0.43173	0.21154	0.90554	0.35259	0.11339	0.48174
984	0.80633	0.47887	0.21724	0.13209	0.18634	0.10628	0.12978	0.21018	0.73186	0.21748	0.08692	0.14651	0.24746	0.95967	0.12206	0.14455	0.073422	0.13369	0.092692	0.10374	0.20894	0.1023	0.10837	0.3361	0.070865	0.8734	0.14964	0.11114	0.40394	0.16497	0.5336	0.099231	0.4981	0.28468	0.16459	0.12708	0.071139	0.10823	0.18072	0.41579	0.22055	0.329	0.42469	0.49411	0.17623	0.89501	0.30049	0.11577	0.6049
985	0.87792	0.55502	0.2257	0.13537	0.1943	0.10878	0.13248	0.21783	0.67435	0.22597	0.08912	0.14972	0.26833	1.028	0.12496	0.14769	0.074987	0.13649	0.094972	0.10619	0.17052	0.10472	0.11091	0.36917	0.071478	0.82658	0.15296	0.11374	0.45729	0.17045	0.48328	0.1016	0.62779	0.30479	0.17004	0.13016	0.070796	0.11053	0.14754	0.50705	0.18028	0.37962	0.4845	0.57445	0.14653	0.85811	0.25148	0.11818	0.77089
986	0.90095	0.64926	0.23519	0.1388	0.20338	0.11132	0.13524	0.22631	0.61888	0.23549	0.091351	0.15303	0.29543	1.0119	0.12796	0.15093	0.076743	0.13936	0.09728	0.10867	0.13951	0.10718	0.11349	0.41155	0.072554	0.77206	0.1564	0.11639	0.52661	0.17646	0.43429	0.10401	0.79787	0.32945	0.176	0.13336	0.071184	0.11285	0.12201	0.63997	0.14719	0.453	0.5617	0.67206	0.12309	0.80819	0.20706	0.12063	0.93704
987	0.88411	0.75254	0.24594	0.14238	0.21392	0.11391	0.13807	0.23583	0.56535	0.24628	0.09361	0.15647	0.33193	0.9641	0.13105	0.15428	0.078636	0.14231	0.099617	0.11121	0.11608	0.10968	0.11614	0.46651	0.07396	0.71425	0.15998	0.11911	0.61407	0.18309	0.38642	0.10645	0.95564	0.36028	0.18258	0.13668	0.072098	0.11521	0.10348	0.81105	0.12174	0.56107	0.65647	0.77463	0.10561	0.75232	0.16892	0.12312	1.021
988	0.84439	0.84088	0.25827	0.14614	0.22639	0.11656	0.14097	0.24661	0.51357	0.25867	0.095896	0.16004	0.38294	0.90543	0.13427	0.15775	0.080628	0.14535	0.10199	0.1138	0.099313	0.11224	0.11885	0.53757	0.075602	0.65539	0.16372	0.12191	0.71504	0.1905	0.33963	0.10894	1.0234	0.3995	0.18992	0.14015	0.073389	0.11759	0.090628	0.96343	0.10329	0.71279	0.75882	0.85571	0.093186	0.69406	0.13825	0.12566	1.0151
[truncated: 212 more rows]
[truncated: 92 more columns]
