# Supplementary material for: Causality Analysis and Cell Network Modeling of Spatial Calcium Signaling Patterns in Liver Lobules
Source: Front Physiol. 2018 Oct 4;9:1377. doi: 10.3389/fphys.2018.01377 (PMC6180170; doi:10.3389/fphys.2018.01377)
Supplement: Supplementary file 1 [file Data_Sheet_1.ZIP › Vadigepalli-Supplementary-Data-Code/Fig6D_data.txt]

Time (sec)	Cell 1	Cell 2	Cell 3	Cell 4	Cell 5	Cell 6	Cell 7	Cell 8	Cell 9	Cell 10	Cell 11	Cell 12	Cell 13	Cell 14	Cell 15	Cell 16	Cell 17	Cell 18	Cell 19	Cell 20	Cell 21	Cell 22	Cell 23	Cell 24	Cell 25	Cell 26	Cell 27	Cell 28	Cell 29	Cell 30	Cell 31	Cell 32	Cell 33	Cell 34	Cell 35	Cell 36	Cell 37	Cell 38	Cell 39	Cell 40	Cell 41	Cell 42	Cell 43	Cell 44	Cell 45	Cell 46	Cell 47	Cell 48	Cell 49
1	0.2	0.2	0.2	0.2	0.2	0.2	0.2	0.2	0.2	0.2	0.2	0.2	0.2	0.2	0.2	0.2	0.2	0.2	0.2	0.2	0.2	0.2	0.2	0.2	0.2	0.2	0.2	0.2	0.2	0.2	0.2	0.2	0.2	0.2	0.2	0.2	0.2	0.2	0.2	0.2	0.2	0.2	0.2	0.2	0.2	0.2	0.2	0.2	0.2
2	0.20519	0.20519	0.20519	0.20519	0.20519	0.20519	0.20519	0.20519	0.20519	0.20519	0.20519	0.20519	0.20519	0.20519	0.20519	0.20519	0.20519	0.20519	0.20519	0.20519	0.20519	0.20519	0.20519	0.20519	0.20519	0.20519	0.20519	0.20519	0.20519	0.20519	0.20519	0.20519	0.20519	0.20519	0.20519	0.20519	0.20519	0.20519	0.20519	0.20519	0.20519	0.20519	0.20519	0.20519	0.20519	0.20519	0.20519	0.20519	0.20519
3	0.20874	0.20874	0.20874	0.20874	0.20874	0.20874	0.20874	0.20874	0.20874	0.20874	0.20874	0.20874	0.20874	0.20874	0.20874	0.20874	0.20874	0.20874	0.20874	0.20874	0.20874	0.20874	0.20874	0.20874	0.20874	0.20874	0.20874	0.20874	0.20874	0.20874	0.20874	0.20874	0.20874	0.20874	0.20874	0.20874	0.20874	0.20874	0.20874	0.20874	0.20874	0.20874	0.20874	0.20874	0.20874	0.20874	0.20874	0.20874	0.20874
4	0.21224	0.21224	0.21224	0.21224	0.21224	0.21224	0.21224	0.21224	0.21224	0.21224	0.21224	0.21224	0.21224	0.21224	0.21224	0.21224	0.21224	0.21224	0.21224	0.21224	0.21224	0.21224	0.21224	0.21224	0.21224	0.21224	0.21224	0.21224	0.21224	0.21224	0.21224	0.21224	0.21224	0.21224	0.21224	0.21224	0.21224	0.21224	0.21224	0.21224	0.21224	0.21224	0.21224	0.21224	0.21224	0.21224	0.21224	0.21224	0.21224
5	0.21575	0.21575	0.21575	0.21575	0.21575	0.21575	0.21575	0.21575	0.21575	0.21575	0.21575	0.21575	0.21575	0.21575	0.21575	0.21575	0.21575	0.21575	0.21575	0.21575	0.21575	0.21575	0.21575	0.21575	0.21575	0.21575	0.21575	0.21575	0.21575	0.21575	0.21575	0.21575	0.21575	0.21575	0.21575	0.21575	0.21575	0.21575	0.21575	0.21575	0.21575	0.21575	0.21575	0.21575	0.21575	0.21575	0.21575	0.21575	0.21575
6	0.21931	0.21931	0.21931	0.21931	0.21931	0.21931	0.21931	0.21931	0.21931	0.21931	0.21931	0.21931	0.21931	0.21931	0.21931	0.21931	0.21931	0.21931	0.21931	0.21931	0.21931	0.21931	0.21931	0.21931	0.21931	0.21931	0.21931	0.21931	0.21931	0.21931	0.21931	0.21931	0.21931	0.21931	0.21931	0.21931	0.21931	0.21931	0.21931	0.21931	0.21931	0.21931	0.21931	0.21931	0.21931	0.21931	0.21931	0.21931	0.21931
7	0.22289	0.22289	0.22289	0.22289	0.22289	0.22289	0.22289	0.22289	0.22289	0.22289	0.22289	0.22289	0.22289	0.22289	0.22289	0.22289	0.22289	0.22289	0.22289	0.22289	0.22289	0.22289	0.22289	0.22289	0.22289	0.22289	0.22289	0.22289	0.22289	0.22289	0.22289	0.22289	0.22289	0.22289	0.22289	0.22289	0.22289	0.22289	0.22289	0.22289	0.22289	0.22289	0.22289	0.22289	0.22289	0.22289	0.22289	0.22289	0.22289
8	0.22651	0.22651	0.22651	0.22651	0.22651	0.22651	0.22651	0.22651	0.22651	0.22651	0.22651	0.22651	0.22651	0.22651	0.22651	0.22651	0.22651	0.22651	0.22651	0.22651	0.22651	0.22651	0.22651	0.22651	0.22651	0.22651	0.22651	0.22651	0.22651	0.22651	0.22651	0.22651	0.22651	0.22651	0.22651	0.22651	0.22651	0.22651	0.22651	0.22651	0.22651	0.22651	0.22651	0.22651	0.22651	0.22651	0.22651	0.22651	0.22651
9	0.23016	0.23016	0.23016	0.23016	0.23016	0.23016	0.23016	0.23016	0.23016	0.23016	0.23016	0.23016	0.23016	0.23016	0.23016	0.23016	0.23016	0.23016	0.23016	0.23016	0.23016	0.23016	0.23016	0.23016	0.23016	0.23016	0.23016	0.23016	0.23016	0.23016	0.23016	0.23016	0.23016	0.23016	0.23016	0.23016	0.23016	0.23016	0.23016	0.23016	0.23016	0.23016	0.23016	0.23016	0.23016	0.23016	0.23016	0.23016	0.23016
10	0.23384	0.23384	0.23384	0.23384	0.23384	0.23384	0.23384	0.23384	0.23384	0.23384	0.23384	0.23384	0.23384	0.23384	0.23384	0.23384	0.23384	0.23384	0.23384	0.23384	0.23384	0.23384	0.23384	0.23384	0.23384	0.23384	0.23384	0.23384	0.23384	0.23384	0.23384	0.23384	0.23384	0.23384	0.23384	0.23384	0.23384	0.23384	0.23384	0.23384	0.23384	0.23384	0.23384	0.23384	0.23384	0.23384	0.23384	0.23384	0.23384
11	0.23755	0.23755	0.23755	0.23755	0.23755	0.23755	0.23755	0.23755	0.23755	0.23755	0.23755	0.23755	0.23755	0.23755	0.23755	0.23755	0.23755	0.23755	0.23755	0.23755	0.23755	0.23755	0.23755	0.23755	0.23755	0.23755	0.23755	0.23755	0.23755	0.23755	0.23755	0.23755	0.23755	0.23755	0.23755	0.23755	0.23755	0.23755	0.23755	0.23755	0.23755	0.23755	0.23755	0.23755	0.23755	0.23755	0.23755	0.23755	0.23755
12	0.24129	0.24129	0.24129	0.24129	0.24129	0.24129	0.24129	0.24129	0.24129	0.24129	0.24129	0.24129	0.24129	0.24129	0.24129	0.24129	0.24129	0.24129	0.24129	0.24129	0.24129	0.24129	0.24129	0.24129	0.24129	0.24129	0.24129	0.24129	0.24129	0.24129	0.24129	0.24129	0.24129	0.24129	0.24129	0.24129	0.24129	0.24129	0.24129	0.24129	0.24129	0.24129	0.24129	0.24129	0.24129	0.24129	0.24129	0.24129	0.24129
13	0.24506	0.24506	0.24506	0.24506	0.24506	0.24506	0.24506	0.24506	0.24506	0.24506	0.24506	0.24506	0.24506	0.24506	0.24506	0.24506	0.24506	0.24506	0.24506	0.24506	0.24506	0.24506	0.24506	0.24506	0.24506	0.24506	0.24506	0.24506	0.24506	0.24506	0.24506	0.24506	0.24506	0.24506	0.24506	0.24506	0.24506	0.24506	0.24506	0.24506	0.24506	0.24506	0.24506	0.24506	0.24506	0.24506	0.24506	0.24506	0.24506
14	0.24884	0.24884	0.24884	0.24884	0.24884	0.24884	0.24884	0.24884	0.24884	0.24884	0.24884	0.24884	0.24884	0.24884	0.24884	0.24884	0.24884	0.24884	0.24884	0.24884	0.24884	0.24884	0.24884	0.24884	0.24884	0.24884	0.24884	0.24884	0.24884	0.24884	0.24884	0.24884	0.24884	0.24884	0.24884	0.24884	0.24884	0.24884	0.24884	0.24884	0.24884	0.24884	0.24884	0.24884	0.24884	0.24884	0.24884	0.24884	0.24884
15	0.25264	0.25264	0.25264	0.25264	0.25264	0.25264	0.25264	0.25264	0.25264	0.25264	0.25264	0.25264	0.25264	0.25264	0.25264	0.25264	0.25264	0.25264	0.25264	0.25264	0.25264	0.25264	0.25264	0.25264	0.25264	0.25264	0.25264	0.25264	0.25264	0.25264	0.25264	0.25264	0.25264	0.25264	0.25264	0.25264	0.25264	0.25264	0.25264	0.25264	0.25264	0.25264	0.25264	0.25264	0.25264	0.25264	0.25264	0.25264	0.25264
16	0.25645	0.25645	0.25645	0.25645	0.25645	0.25645	0.25645	0.25645	0.25645	0.25645	0.25645	0.25645	0.25645	0.25645	0.25645	0.25645	0.25645	0.25645	0.25645	0.25645	0.25645	0.25645	0.25645	0.25645	0.25645	0.25645	0.25645	0.25645	0.25645	0.25645	0.25645	0.25645	0.25645	0.25645	0.25645	0.25645	0.25645	0.25645	0.25645	0.25645	0.25645	0.25645	0.25645	0.25645	0.25645	0.25645	0.25645	0.25645	0.25645
17	0.26027	0.26027	0.26027	0.26027	0.26027	0.26027	0.26027	0.26027	0.26027	0.26027	0.26027	0.26027	0.26027	0.26027	0.26027	0.26027	0.26027	0.26027	0.26027	0.26027	0.26027	0.26027	0.26027	0.26027	0.26027	0.26027	0.26027	0.26027	0.26027	0.26027	0.26027	0.26027	0.26027	0.26027	0.26027	0.26027	0.26027	0.26027	0.26027	0.26027	0.26027	0.26027	0.26027	0.26027	0.26027	0.26027	0.26027	0.26027	0.26027
18	0.26408	0.26408	0.26408	0.26408	0.26408	0.26408	0.26408	0.26408	0.26408	0.26408	0.26408	0.26408	0.26408	0.26408	0.26408	0.26408	0.26408	0.26408	0.26408	0.26408	0.26408	0.26408	0.26408	0.26408	0.26408	0.26408	0.26408	0.26408	0.26408	0.26408	0.26408	0.26408	0.26408	0.26408	0.26408	0.26408	0.26408	0.26408	0.26408	0.26408	0.26408	0.26408	0.26408	0.26408	0.26408	0.26408	0.26408	0.26408	0.26408
19	0.26789	0.26789	0.26789	0.26789	0.26789	0.26789	0.26789	0.26789	0.26789	0.26789	0.26789	0.26789	0.26789	0.26789	0.26789	0.26789	0.26789	0.26789	0.26789	0.26789	0.26789	0.26789	0.26789	0.26789	0.26789	0.26789	0.26789	0.26789	0.26789	0.26789	0.26789	0.26789	0.26789	0.26789	0.26789	0.26789	0.26789	0.26789	0.26789	0.26789	0.26789	0.26789	0.26789	0.26789	0.26789	0.26789	0.26789	0.26789	0.26789
20	0.27169	0.27169	0.27169	0.27169	0.27169	0.27169	0.27169	0.27169	0.27169	0.27169	0.27169	0.27169	0.27169	0.27169	0.27169	0.27169	0.27169	0.27169	0.27169	0.27169	0.27169	0.27169	0.27169	0.27169	0.27169	0.27169	0.27169	0.27169	0.27169	0.27169	0.27169	0.27169	0.27169	0.27169	0.27169	0.27169	0.27169	0.27169	0.27169	0.27169	0.27169	0.27169	0.27169	0.27169	0.27169	0.27169	0.27169	0.27169	0.27169
21	0.27546	0.27546	0.27546	0.27546	0.27546	0.27546	0.27546	0.27546	0.27546	0.27546	0.27546	0.27546	0.27546	0.27546	0.27546	0.27546	0.27546	0.27546	0.27546	0.27546	0.27546	0.27546	0.27546	0.27546	0.27546	0.27546	0.27546	0.27546	0.27546	0.27546	0.27546	0.27546	0.27546	0.27546	0.27546	0.27546	0.27546	0.27546	0.27546	0.27546	0.27546	0.27546	0.27546	0.27546	0.27546	0.27546	0.27546	0.27546	0.27546
22	0.2792	0.2792	0.2792	0.2792	0.2792	0.2792	0.2792	0.2792	0.2792	0.2792	0.2792	0.2792	0.2792	0.2792	0.2792	0.2792	0.2792	0.2792	0.2792	0.2792	0.2792	0.2792	0.2792	0.2792	0.2792	0.2792	0.2792	0.2792	0.2792	0.2792	0.2792	0.2792	0.2792	0.2792	0.2792	0.2792	0.2792	0.2792	0.2792	0.2792	0.2792	0.2792	0.2792	0.2792	0.2792	0.2792	0.2792	0.2792	0.2792
23	0.2829	0.2829	0.2829	0.2829	0.2829	0.2829	0.2829	0.2829	0.2829	0.2829	0.2829	0.2829	0.2829	0.2829	0.2829	0.2829	0.2829	0.2829	0.2829	0.2829	0.2829	0.2829	0.2829	0.2829	0.2829	0.2829	0.2829	0.2829	0.2829	0.2829	0.2829	0.2829	0.2829	0.2829	0.2829	0.2829	0.2829	0.2829	0.2829	0.2829	0.2829	0.2829	0.2829	0.2829	0.2829	0.2829	0.2829	0.2829	0.2829
24	0.28656	0.28656	0.28656	0.28656	0.28656	0.28656	0.28656	0.28656	0.28656	0.28656	0.28656	0.28656	0.28656	0.28656	0.28656	0.28656	0.28656	0.28656	0.28656	0.28656	0.28656	0.28656	0.28656	0.28656	0.28656	0.28656	0.28656	0.28656	0.28656	0.28656	0.28656	0.28656	0.28656	0.28656	0.28656	0.28656	0.28656	0.28656	0.28656	0.28656	0.28656	0.28656	0.28656	0.28656	0.28656	0.28656	0.28656	0.28656	0.28656
25	0.29015	0.29015	0.29015	0.29015	0.29015	0.29015	0.29015	0.29015	0.29015	0.29015	0.29015	0.29015	0.29015	0.29015	0.29015	0.29015	0.29015	0.29015	0.29015	0.29015	0.29015	0.29015	0.29015	0.29015	0.29015	0.29015	0.29015	0.29015	0.29015	0.29015	0.29015	0.29015	0.29015	0.29015	0.29015	0.29015	0.29015	0.29015	0.29015	0.29015	0.29015	0.29015	0.29015	0.29015	0.29015	0.29015	0.29015	0.29015	0.29015
26	0.29367	0.29367	0.29367	0.29367	0.29367	0.29367	0.29367	0.29367	0.29367	0.29367	0.29367	0.29367	0.29367	0.29367	0.29367	0.29367	0.29367	0.29367	0.29367	0.29367	0.29367	0.29367	0.29367	0.29367	0.29367	0.29367	0.29367	0.29367	0.29367	0.29367	0.29367	0.29367	0.29367	0.29367	0.29367	0.29367	0.29367	0.29367	0.29367	0.29367	0.29367	0.29367	0.29367	0.29367	0.29367	0.29367	0.29367	0.29367	0.29367
27	0.29712	0.29712	0.29712	0.29712	0.29712	0.29712	0.29712	0.29712	0.29712	0.29712	0.29712	0.29712	0.29712	0.29712	0.29712	0.29712	0.29712	0.29712	0.29712	0.29712	0.29712	0.29712	0.29712	0.29712	0.29712	0.29712	0.29712	0.29712	0.29712	0.29712	0.29712	0.29712	0.29712	0.29712	0.29712	0.29712	0.29712	0.29712	0.29712	0.29712	0.29712	0.29712	0.29712	0.29712	0.29712	0.29712	0.29712	0.29712	0.29712
28	0.30047	0.30047	0.30047	0.30047	0.30047	0.30047	0.30047	0.30047	0.30047	0.30047	0.30047	0.30047	0.30047	0.30047	0.30047	0.30047	0.30047	0.30047	0.30047	0.30047	0.30047	0.30047	0.30047	0.30047	0.30047	0.30047	0.30047	0.30047	0.30047	0.30047	0.30047	0.30047	0.30047	0.30047	0.30047	0.30047	0.30047	0.30047	0.30047	0.30047	0.30047	0.30047	0.30047	0.30047	0.30047	0.30047	0.30047	0.30047	0.30047
29	0.30372	0.30372	0.30372	0.30372	0.30372	0.30372	0.30372	0.30372	0.30372	0.30372	0.30372	0.30372	0.30372	0.30372	0.30372	0.30372	0.30372	0.30372	0.30372	0.30372	0.30372	0.30372	0.30372	0.30372	0.30372	0.30372	0.30372	0.30372	0.30372	0.30372	0.30372	0.30372	0.30372	0.30372	0.30372	0.30372	0.30372	0.30372	0.30372	0.30372	0.30372	0.30372	0.30372	0.30372	0.30372	0.30372	0.30372	0.30372	0.30372
30	0.30687	0.30687	0.30687	0.30687	0.30687	0.30687	0.30687	0.30687	0.30687	0.30687	0.30687	0.30687	0.30687	0.30687	0.30687	0.30687	0.30687	0.30687	0.30687	0.30687	0.30687	0.30687	0.30687	0.30687	0.30687	0.30687	0.30687	0.30687	0.30687	0.30687	0.30687	0.30687	0.30687	0.30687	0.30687	0.30687	0.30687	0.30687	0.30687	0.30687	0.30687	0.30687	0.30687	0.30687	0.30687	0.30687	0.30687	0.30687	0.30687
31	0.30989	0.30989	0.30989	0.30989	0.30989	0.30989	0.30989	0.30989	0.30989	0.30989	0.30989	0.30989	0.30989	0.30989	0.30989	0.30989	0.30989	0.30989	0.30989	0.30989	0.30989	0.30989	0.30989	0.30989	0.30989	0.30989	0.30989	0.30989	0.30989	0.30989	0.30989	0.30989	0.30989	0.30989	0.30989	0.30989	0.30989	0.30989	0.30989	0.30989	0.30989	0.30989	0.30989	0.30989	0.30989	0.30989	0.30989	0.30989	0.30989
32	0.31278	0.31278	0.31278	0.31278	0.31278	0.31278	0.31278	0.31278	0.31278	0.31278	0.31278	0.31278	0.31278	0.31278	0.31278	0.31278	0.31278	0.31278	0.31278	0.31278	0.31278	0.31278	0.31278	0.31278	0.31278	0.31278	0.31278	0.31278	0.31278	0.31278	0.31278	0.31278	0.31278	0.31278	0.31278	0.31278	0.31278	0.31278	0.31278	0.31278	0.31278	0.31278	0.31278	0.31278	0.31278	0.31278	0.31278	0.31278	0.31278
33	0.31553	0.31553	0.31553	0.31553	0.31553	0.31553	0.31553	0.31553	0.31553	0.31553	0.31553	0.31553	0.31553	0.31553	0.31553	0.31553	0.31553	0.31553	0.31553	0.31553	0.31553	0.31553	0.31553	0.31553	0.31553	0.31553	0.31553	0.31553	0.31553	0.31553	0.31553	0.31553	0.31553	0.31553	0.31553	0.31553	0.31553	0.31553	0.31553	0.31553	0.31553	0.31553	0.31553	0.31553	0.31553	0.31553	0.31553	0.31553	0.31553
34	0.31813	0.31813	0.31813	0.31813	0.31813	0.31813	0.31813	0.31813	0.31813	0.31813	0.31813	0.31813	0.31813	0.31813	0.31813	0.31813	0.31813	0.31813	0.31813	0.31813	0.31813	0.31813	0.31813	0.31813	0.31813	0.31813	0.31813	0.31813	0.31813	0.31813	0.31813	0.31813	0.31813	0.31813	0.31813	0.31813	0.31813	0.31813	0.31813	0.31813	0.31813	0.31813	0.31813	0.31813	0.31813	0.31813	0.31813	0.31813	0.31813
35	0.32058	0.32058	0.32058	0.32058	0.32058	0.32058	0.32058	0.32058	0.32058	0.32058	0.32058	0.32058	0.32058	0.32058	0.32058	0.32058	0.32058	0.32058	0.32058	0.32058	0.32058	0.32058	0.32058	0.32058	0.32058	0.32058	0.32058	0.32058	0.32058	0.32058	0.32058	0.32058	0.32058	0.32058	0.32058	0.32058	0.32058	0.32058	0.32058	0.32058	0.32058	0.32058	0.32058	0.32058	0.32058	0.32058	0.32058	0.32058	0.32058
36	0.32286	0.32286	0.32286	0.32286	0.32286	0.32286	0.32286	0.32286	0.32286	0.32286	0.32286	0.32286	0.32286	0.32286	0.32286	0.32286	0.32286	0.32286	0.32286	0.32286	0.32286	0.32286	0.32286	0.32286	0.32286	0.32286	0.32286	0.32286	0.32286	0.32286	0.32286	0.32286	0.32286	0.32286	0.32286	0.32286	0.32286	0.32286	0.32286	0.32286	0.32286	0.32286	0.32286	0.32286	0.32286	0.32286	0.32286	0.32286	0.32286
37	0.32497	0.32497	0.32497	0.32497	0.32497	0.32497	0.32497	0.32497	0.32497	0.32497	0.32497	0.32497	0.32497	0.32497	0.32497	0.32497	0.32497	0.32497	0.32497	0.32497	0.32497	0.32497	0.32497	0.32497	0.32497	0.32497	0.32497	0.32497	0.32497	0.32497	0.32497	0.32497	0.32497	0.32497	0.32497	0.32497	0.32497	0.32497	0.32497	0.32497	0.32497	0.32497	0.32497	0.32497	0.32497	0.32497	0.32497	0.32497	0.32497
38	0.3269	0.3269	0.3269	0.3269	0.3269	0.3269	0.3269	0.3269	0.3269	0.3269	0.3269	0.3269	0.3269	0.3269	0.3269	0.3269	0.3269	0.3269	0.3269	0.3269	0.3269	0.3269	0.3269	0.3269	0.3269	0.3269	0.3269	0.3269	0.3269	0.3269	0.3269	0.3269	0.3269	0.3269	0.3269	0.3269	0.3269	0.3269	0.3269	0.3269	0.3269	0.3269	0.3269	0.3269	0.3269	0.3269	0.3269	0.3269	0.3269
39	0.32867	0.32867	0.32867	0.32867	0.32867	0.32867	0.32867	0.32867	0.32867	0.32867	0.32867	0.32867	0.32867	0.32867	0.32867	0.32867	0.32867	0.32867	0.32867	0.32867	0.32867	0.32867	0.32867	0.32867	0.32867	0.32867	0.32867	0.32867	0.32867	0.32867	0.32867	0.32867	0.32867	0.32867	0.32867	0.32867	0.32867	0.32867	0.32867	0.32867	0.32867	0.32867	0.32867	0.32867	0.32867	0.32867	0.32867	0.32867	0.32867
40	0.33025	0.33025	0.33025	0.33025	0.33025	0.33025	0.33025	0.33025	0.33025	0.33025	0.33025	0.33025	0.33025	0.33025	0.33025	0.33025	0.33025	0.33025	0.33025	0.33025	0.33025	0.33025	0.33025	0.33025	0.33025	0.33025	0.33025	0.33025	0.33025	0.33025	0.33025	0.33025	0.33025	0.33025	0.33025	0.33025	0.33025	0.33025	0.33025	0.33025	0.33025	0.33025	0.33025	0.33025	0.33025	0.33025	0.33025	0.33025	0.33025
41	0.33165	0.33165	0.33165	0.33165	0.33165	0.33165	0.33165	0.33165	0.33165	0.33165	0.33165	0.33165	0.33165	0.33165	0.33165	0.33165	0.33165	0.33165	0.33165	0.33165	0.33165	0.33165	0.33165	0.33165	0.33165	0.33165	0.33165	0.33165	0.33165	0.33165	0.33165	0.33165	0.33165	0.33165	0.33165	0.33165	0.33165	0.33165	0.33165	0.33165	0.33165	0.33165	0.33165	0.33165	0.33165	0.33165	0.33165	0.33165	0.33165
42	0.33286	0.33286	0.33286	0.33286	0.33286	0.33286	0.33286	0.33286	0.33286	0.33286	0.33286	0.33286	0.33286	0.33286	0.33286	0.33286	0.33286	0.33286	0.33286	0.33286	0.33286	0.33286	0.33286	0.33286	0.33286	0.33286	0.33286	0.33286	0.33286	0.33286	0.33286	0.33286	0.33286	0.33286	0.33286	0.33286	0.33286	0.33286	0.33286	0.33286	0.33286	0.33286	0.33286	0.33286	0.33286	0.33286	0.33286	0.33286	0.33286
43	0.3339	0.3339	0.3339	0.3339	0.3339	0.3339	0.3339	0.3339	0.3339	0.3339	0.3339	0.3339	0.3339	0.3339	0.3339	0.3339	0.3339	0.3339	0.3339	0.3339	0.3339	0.3339	0.3339	0.3339	0.3339	0.3339	0.3339	0.3339	0.3339	0.3339	0.3339	0.3339	0.3339	0.3339	0.3339	0.3339	0.3339	0.3339	0.3339	0.3339	0.3339	0.3339	0.3339	0.3339	0.3339	0.3339	0.3339	0.3339	0.3339
44	0.33476	0.33476	0.33476	0.33476	0.33476	0.33476	0.33476	0.33476	0.33476	0.33476	0.33476	0.33476	0.33476	0.33476	0.33476	0.33476	0.33476	0.33476	0.33476	0.33476	0.33476	0.33476	0.33476	0.33476	0.33476	0.33476	0.33476	0.33476	0.33476	0.33476	0.33476	0.33476	0.33476	0.33476	0.33476	0.33476	0.33476	0.33476	0.33476	0.33476	0.33476	0.33476	0.33476	0.33476	0.33476	0.33476	0.33476	0.33476	0.33476
45	0.33545	0.33545	0.33545	0.33545	0.33545	0.33545	0.33545	0.33545	0.33545	0.33545	0.33545	0.33545	0.33545	0.33545	0.33545	0.33545	0.33545	0.33545	0.33545	0.33545	0.33545	0.33545	0.33545	0.33545	0.33545	0.33545	0.33545	0.33545	0.33545	0.33545	0.33545	0.33545	0.33545	0.33545	0.33545	0.33545	0.33545	0.33545	0.33545	0.33545	0.33545	0.33545	0.33545	0.33545	0.33545	0.33545	0.33545	0.33545	0.33545
46	0.33597	0.33597	0.33597	0.33597	0.33597	0.33597	0.33597	0.33597	0.33597	0.33597	0.33597	0.33597	0.33597	0.33597	0.33597	0.33597	0.33597	0.33597	0.33597	0.33597	0.33597	0.33597	0.33597	0.33597	0.33597	0.33597	0.33597	0.33597	0.33597	0.33597	0.33597	0.33597	0.33597	0.33597	0.33597	0.33597	0.33597	0.33597	0.33597	0.33597	0.33597	0.33597	0.33597	0.33597	0.33597	0.33597	0.33597	0.33597	0.33597
47	0.33633	0.33633	0.33633	0.33633	0.33633	0.33633	0.33633	0.33633	0.33633	0.33633	0.33633	0.33633	0.33633	0.33633	0.33633	0.33633	0.33633	0.33633	0.33633	0.33633	0.33633	0.33633	0.33633	0.33633	0.33633	0.33633	0.33633	0.33633	0.33633	0.33633	0.33633	0.33633	0.33633	0.33633	0.33633	0.33633	0.33633	0.33633	0.33633	0.33633	0.33633	0.33633	0.33633	0.33633	0.33633	0.33633	0.33633	0.33633	0.33633
48	0.33654	0.33654	0.33654	0.33654	0.33654	0.33654	0.33654	0.33654	0.33654	0.33654	0.33654	0.33654	0.33654	0.33654	0.33654	0.33654	0.33654	0.33654	0.33654	0.33654	0.33654	0.33654	0.33654	0.33654	0.33654	0.33654	0.33654	0.33654	0.33654	0.33654	0.33654	0.33654	0.33654	0.33654	0.33654	0.33654	0.33654	0.33654	0.33654	0.33654	0.33654	0.33654	0.33654	0.33654	0.33654	0.33654	0.33654	0.33654	0.33654
49	0.33661	0.33661	0.33661	0.33661	0.33661	0.33661	0.33661	0.33661	0.33661	0.33661	0.33661	0.33661	0.33661	0.33661	0.33661	0.33661	0.33661	0.33661	0.33661	0.33661	0.33661	0.33661	0.33661	0.33661	0.33661	0.33661	0.33661	0.33661	0.33661	0.33661	0.33661	0.33661	0.33661	0.33661	0.33661	0.33661	0.33661	0.33661	0.33661	0.33661	0.33661	0.33661	0.33661	0.33661	0.33661	0.33661	0.33661	0.33661	0.33661
50	0.33655	0.33655	0.33655	0.33655	0.33655	0.33655	0.33655	0.33655	0.33655	0.33655	0.33655	0.33655	0.33655	0.33655	0.33655	0.33655	0.33655	0.33655	0.33655	0.33655	0.33655	0.33655	0.33655	0.33655	0.33655	0.33655	0.33655	0.33655	0.33655	0.33655	0.33655	0.33655	0.33655	0.33655	0.33655	0.33655	0.33655	0.33655	0.33655	0.33655	0.33655	0.33655	0.33655	0.33655	0.33655	0.33655	0.33655	0.33655	0.33655
51	0.33636	0.33636	0.33636	0.33636	0.33636	0.33636	0.33636	0.33636	0.33636	0.33636	0.33636	0.33636	0.33636	0.33636	0.33636	0.33636	0.33636	0.33636	0.33636	0.33636	0.33636	0.33636	0.33636	0.33636	0.33636	0.33636	0.33636	0.33636	0.33636	0.33636	0.33636	0.33636	0.33636	0.33636	0.33636	0.33636	0.33636	0.33636	0.33636	0.33636	0.33636	0.33636	0.33636	0.33636	0.33636	0.33636	0.33636	0.33636	0.33636
52	0.33607	0.33607	0.33607	0.33607	0.33607	0.33607	0.33607	0.33607	0.33607	0.33607	0.33607	0.33607	0.33607	0.33607	0.33607	0.33607	0.33607	0.33607	0.33607	0.33607	0.33607	0.33607	0.33607	0.33607	0.33607	0.33607	0.33607	0.33607	0.33607	0.33607	0.33607	0.33607	0.33607	0.33607	0.33607	0.33607	0.33607	0.33607	0.33607	0.33607	0.33607	0.33607	0.33607	0.33607	0.33607	0.33607	0.33607	0.33607	0.33607
53	0.33568	0.33568	0.33568	0.33568	0.33568	0.33568	0.33568	0.33568	0.33568	0.33568	0.33568	0.33568	0.33568	0.33568	0.33568	0.33568	0.33568	0.33568	0.33568	0.33568	0.33568	0.33568	0.33568	0.33568	0.33568	0.33568	0.33568	0.33568	0.33568	0.33568	0.33568	0.33568	0.33568	0.33568	0.33568	0.33568	0.33568	0.33568	0.33568	0.33568	0.33568	0.33568	0.33568	0.33568	0.33568	0.33568	0.33568	0.33568	0.33568
54	0.3352	0.3352	0.3352	0.3352	0.3352	0.3352	0.3352	0.3352	0.3352	0.3352	0.3352	0.3352	0.3352	0.3352	0.3352	0.3352	0.3352	0.3352	0.3352	0.3352	0.3352	0.3352	0.3352	0.3352	0.3352	0.3352	0.3352	0.3352	0.3352	0.3352	0.3352	0.3352	0.3352	0.3352	0.3352	0.3352	0.3352	0.3352	0.3352	0.3352	0.3352	0.3352	0.3352	0.3352	0.3352	0.3352	0.3352	0.3352	0.3352
55	0.33465	0.33465	0.33465	0.33465	0.33465	0.33465	0.33465	0.33465	0.33465	0.33465	0.33465	0.33465	0.33465	0.33465	0.33465	0.33465	0.33465	0.33465	0.33465	0.33465	0.33465	0.33465	0.33465	0.33465	0.33465	0.33465	0.33465	0.33465	0.33465	0.33465	0.33465	0.33465	0.33465	0.33465	0.33465	0.33465	0.33465	0.33465	0.33465	0.33465	0.33465	0.33465	0.33465	0.33465	0.33465	0.33465	0.33465	0.33465	0.33465
56	0.33405	0.33405	0.33405	0.33405	0.33405	0.33405	0.33405	0.33405	0.33405	0.33405	0.33405	0.33405	0.33405	0.33405	0.33405	0.33405	0.33405	0.33405	0.33405	0.33405	0.33405	0.33405	0.33405	0.33405	0.33405	0.33405	0.33405	0.33405	0.33405	0.33405	0.33405	0.33405	0.33405	0.33405	0.33405	0.33405	0.33405	0.33405	0.33405	0.33405	0.33405	0.33405	0.33405	0.33405	0.33405	0.33405	0.33405	0.33405	0.33405
57	0.33339	0.33339	0.33339	0.33339	0.33339	0.33339	0.33339	0.33339	0.33339	0.33339	0.33339	0.33339	0.33339	0.33339	0.33339	0.33339	0.33339	0.33339	0.33339	0.33339	0.33339	0.33339	0.33339	0.33339	0.33339	0.33339	0.33339	0.33339	0.33339	0.33339	0.33339	0.33339	0.33339	0.33339	0.33339	0.33339	0.33339	0.33339	0.33339	0.33339	0.33339	0.33339	0.33339	0.33339	0.33339	0.33339	0.33339	0.33339	0.33339
58	0.33269	0.33269	0.33269	0.33269	0.33269	0.33269	0.33269	0.33269	0.33269	0.33269	0.33269	0.33269	0.33269	0.33269	0.33269	0.33269	0.33269	0.33269	0.33269	0.33269	0.33269	0.33269	0.33269	0.33269	0.33269	0.33269	0.33269	0.33269	0.33269	0.33269	0.33269	0.33269	0.33269	0.33269	0.33269	0.33269	0.33269	0.33269	0.33269	0.33269	0.33269	0.33269	0.33269	0.33269	0.33269	0.33269	0.33269	0.33269	0.33269
59	0.33197	0.33197	0.33197	0.33197	0.33197	0.33197	0.33197	0.33197	0.33197	0.33197	0.33197	0.33197	0.33197	0.33197	0.33197	0.33197	0.33197	0.33197	0.33197	0.33197	0.33197	0.33197	0.33197	0.33197	0.33197	0.33197	0.33197	0.33197	0.33197	0.33197	0.33197	0.33197	0.33197	0.33197	0.33197	0.33197	0.33197	0.33197	0.33197	0.33197	0.33197	0.33197	0.33197	0.33197	0.33197	0.33197	0.33197	0.33197	0.33197
60	0.33123	0.33123	0.33123	0.33123	0.33123	0.33123	0.33123	0.33123	0.33123	0.33123	0.33123	0.33123	0.33123	0.33123	0.33123	0.33123	0.33123	0.33123	0.33123	0.33123	0.33123	0.33123	0.33123	0.33123	0.33123	0.33123	0.33123	0.33123	0.33123	0.33123	0.33123	0.33123	0.33123	0.33123	0.33123	0.33123	0.33123	0.33123	0.33123	0.33123	0.33123	0.33123	0.33123	0.33123	0.33123	0.33123	0.33123	0.33123	0.33123
61	0.33049	0.33049	0.33049	0.33049	0.33049	0.33049	0.33049	0.33049	0.33049	0.33049	0.33049	0.33049	0.33049	0.33049	0.33049	0.33049	0.33049	0.33049	0.33049	0.33049	0.33049	0.33049	0.33049	0.33049	0.33049	0.33049	0.33049	0.33049	0.33049	0.33049	0.33049	0.33049	0.33049	0.33049	0.33049	0.33049	0.33049	0.33049	0.33049	0.33049	0.33049	0.33049	0.33049	0.33049	0.33049	0.33049	0.33049	0.33049	0.33049
62	0.32975	0.32975	0.32975	0.32975	0.32975	0.32975	0.32975	0.32975	0.32975	0.32975	0.32975	0.32975	0.32975	0.32975	0.32975	0.32975	0.32975	0.32975	0.32975	0.32975	0.32975	0.32975	0.32975	0.32975	0.32975	0.32975	0.32975	0.32975	0.32975	0.32975	0.32975	0.32975	0.32975	0.32975	0.32975	0.32975	0.32975	0.32975	0.32975	0.32975	0.32975	0.32975	0.32975	0.32975	0.32975	0.32975	0.32975	0.32975	0.32975
63	0.32901	0.32901	0.32901	0.32901	0.32901	0.32901	0.32901	0.32901	0.32901	0.32901	0.32901	0.32901	0.32901	0.32901	0.32901	0.32901	0.32901	0.32901	0.32901	0.32901	0.32901	0.32901	0.32901	0.32901	0.32901	0.32901	0.32901	0.32901	0.32901	0.32901	0.32901	0.32901	0.32901	0.32901	0.32901	0.32901	0.32901	0.32901	0.32901	0.32901	0.32901	0.32901	0.32901	0.32901	0.32901	0.32901	0.32901	0.32901	0.32901
64	0.32829	0.32829	0.32829	0.32829	0.32829	0.32829	0.32829	0.32829	0.32829	0.32829	0.32829	0.32829	0.32829	0.32829	0.32829	0.32829	0.32829	0.32829	0.32829	0.32829	0.32829	0.32829	0.32829	0.32829	0.32829	0.32829	0.32829	0.32829	0.32829	0.32829	0.32829	0.32829	0.32829	0.32829	0.32829	0.32829	0.32829	0.32829	0.32829	0.32829	0.32829	0.32829	0.32829	0.32829	0.32829	0.32829	0.32829	0.32829	0.32829
65	0.3276	0.3276	0.3276	0.3276	0.3276	0.3276	0.3276	0.3276	0.3276	0.3276	0.3276	0.3276	0.3276	0.3276	0.3276	0.3276	0.3276	0.3276	0.3276	0.3276	0.3276	0.3276	0.3276	0.3276	0.3276	0.3276	0.3276	0.3276	0.3276	0.3276	0.3276	0.3276	0.3276	0.3276	0.3276	0.3276	0.3276	0.3276	0.3276	0.3276	0.3276	0.3276	0.3276	0.3276	0.3276	0.3276	0.3276	0.3276	0.3276
66	0.32693	0.32693	0.32693	0.32693	0.32693	0.32693	0.32693	0.32693	0.32693	0.32693	0.32693	0.32693	0.32693	0.32693	0.32693	0.32693	0.32693	0.32693	0.32693	0.32693	0.32693	0.32693	0.32693	0.32693	0.32693	0.32693	0.32693	0.32693	0.32693	0.32693	0.32693	0.32693	0.32693	0.32693	0.32693	0.32693	0.32693	0.32693	0.32693	0.32693	0.32693	0.32693	0.32693	0.32693	0.32693	0.32693	0.32693	0.32693	0.32693
67	0.32629	0.32629	0.32629	0.32629	0.32629	0.32629	0.32629	0.32629	0.32629	0.32629	0.32629	0.32629	0.32629	0.32629	0.32629	0.32629	0.32629	0.32629	0.32629	0.32629	0.32629	0.32629	0.32629	0.32629	0.32629	0.32629	0.32629	0.32629	0.32629	0.32629	0.32629	0.32629	0.32629	0.32629	0.32629	0.32629	0.32629	0.32629	0.32629	0.32629	0.32629	0.32629	0.32629	0.32629	0.32629	0.32629	0.32629	0.32629	0.32629
68	0.32569	0.32569	0.32569	0.32569	0.32569	0.32569	0.32569	0.32569	0.32569	0.32569	0.32569	0.32569	0.32569	0.32569	0.32569	0.32569	0.32569	0.32569	0.32569	0.32569	0.32569	0.32569	0.32569	0.32569	0.32569	0.32569	0.32569	0.32569	0.32569	0.32569	0.32569	0.32569	0.32569	0.32569	0.32569	0.32569	0.32569	0.32569	0.32569	0.32569	0.32569	0.32569	0.32569	0.32569	0.32569	0.32569	0.32569	0.32569	0.32569
69	0.32513	0.32513	0.32513	0.32513	0.32513	0.32513	0.32513	0.32513	0.32513	0.32513	0.32513	0.32513	0.32513	0.32513	0.32513	0.32513	0.32513	0.32513	0.32513	0.32513	0.32513	0.32513	0.32513	0.32513	0.32513	0.32513	0.32513	0.32513	0.32513	0.32513	0.32513	0.32513	0.32513	0.32513	0.32513	0.32513	0.32513	0.32513	0.32513	0.32513	0.32513	0.32513	0.32513	0.32513	0.32513	0.32513	0.32513	0.32513	0.32513
70	0.3246	0.3246	0.3246	0.3246	0.3246	0.3246	0.3246	0.3246	0.3246	0.3246	0.3246	0.3246	0.3246	0.3246	0.3246	0.3246	0.3246	0.3246	0.3246	0.3246	0.3246	0.3246	0.3246	0.3246	0.3246	0.3246	0.3246	0.3246	0.3246	0.3246	0.3246	0.3246	0.3246	0.3246	0.3246	0.3246	0.3246	0.3246	0.3246	0.3246	0.3246	0.3246	0.3246	0.3246	0.3246	0.3246	0.3246	0.3246	0.3246
71	0.32413	0.32413	0.32413	0.32413	0.32413	0.32413	0.32413	0.32413	0.32413	0.32413	0.32413	0.32413	0.32413	0.32413	0.32413	0.32413	0.32413	0.32413	0.32413	0.32413	0.32413	0.32413	0.32413	0.32413	0.32413	0.32413	0.32413	0.32413	0.32413	0.32413	0.32413	0.32413	0.32413	0.32413	0.32413	0.32413	0.32413	0.32413	0.32413	0.32413	0.32413	0.32413	0.32413	0.32413	0.32413	0.32413	0.32413	0.32413	0.32413
72	0.3237	0.3237	0.3237	0.3237	0.3237	0.3237	0.3237	0.3237	0.3237	0.3237	0.3237	0.3237	0.3237	0.3237	0.3237	0.3237	0.3237	0.3237	0.3237	0.3237	0.3237	0.3237	0.3237	0.3237	0.3237	0.3237	0.3237	0.3237	0.3237	0.3237	0.3237	0.3237	0.3237	0.3237	0.3237	0.3237	0.3237	0.3237	0.3237	0.3237	0.3237	0.3237	0.3237	0.3237	0.3237	0.3237	0.3237	0.3237	0.3237
73	0.32331	0.32331	0.32331	0.32331	0.32331	0.32331	0.32331	0.32331	0.32331	0.32331	0.32331	0.32331	0.32331	0.32331	0.32331	0.32331	0.32331	0.32331	0.32331	0.32331	0.32331	0.32331	0.32331	0.32331	0.32331	0.32331	0.32331	0.32331	0.32331	0.32331	0.32331	0.32331	0.32331	0.32331	0.32331	0.32331	0.32331	0.32331	0.32331	0.32331	0.32331	0.32331	0.32331	0.32331	0.32331	0.32331	0.32331	0.32331	0.32331
74	0.32297	0.32297	0.32297	0.32297	0.32297	0.32297	0.32297	0.32297	0.32297	0.32297	0.32297	0.32297	0.32297	0.32297	0.32297	0.32297	0.32297	0.32297	0.32297	0.32297	0.32297	0.32297	0.32297	0.32297	0.32297	0.32297	0.32297	0.32297	0.32297	0.32297	0.32297	0.32297	0.32297	0.32297	0.32297	0.32297	0.32297	0.32297	0.32297	0.32297	0.32297	0.32297	0.32297	0.32297	0.32297	0.32297	0.32297	0.32297	0.32297
75	0.32268	0.32268	0.32268	0.32268	0.32268	0.32268	0.32268	0.32268	0.32268	0.32268	0.32268	0.32268	0.32268	0.32268	0.32268	0.32268	0.32268	0.32268	0.32268	0.32268	0.32268	0.32268	0.32268	0.32268	0.32268	0.32268	0.32268	0.32268	0.32268	0.32268	0.32268	0.32268	0.32268	0.32268	0.32268	0.32268	0.32268	0.32268	0.32268	0.32268	0.32268	0.32268	0.32268	0.32268	0.32268	0.32268	0.32268	0.32268	0.32268
76	0.32242	0.32242	0.32242	0.32242	0.32242	0.32242	0.32242	0.32242	0.32242	0.32242	0.32242	0.32242	0.32242	0.32242	0.32242	0.32242	0.32242	0.32242	0.32242	0.32242	0.32242	0.32242	0.32242	0.32242	0.32242	0.32242	0.32242	0.32242	0.32242	0.32242	0.32242	0.32242	0.32242	0.32242	0.32242	0.32242	0.32242	0.32242	0.32242	0.32242	0.32242	0.32242	0.32242	0.32242	0.32242	0.32242	0.32242	0.32242	0.32242
77	0.32221	0.32221	0.32221	0.32221	0.32221	0.32221	0.32221	0.32221	0.32221	0.32221	0.32221	0.32221	0.32221	0.32221	0.32221	0.32221	0.32221	0.32221	0.32221	0.32221	0.32221	0.32221	0.32221	0.32221	0.32221	0.32221	0.32221	0.32221	0.32221	0.32221	0.32221	0.32221	0.32221	0.32221	0.32221	0.32221	0.32221	0.32221	0.32221	0.32221	0.32221	0.32221	0.32221	0.32221	0.32221	0.32221	0.32221	0.32221	0.32221
78	0.32205	0.32205	0.32205	0.32205	0.32205	0.32205	0.32205	0.32205	0.32205	0.32205	0.32205	0.32205	0.32205	0.32205	0.32205	0.32205	0.32205	0.32205	0.32205	0.32205	0.32205	0.32205	0.32205	0.32205	0.32205	0.32205	0.32205	0.32205	0.32205	0.32205	0.32205	0.32205	0.32205	0.32205	0.32205	0.32205	0.32205	0.32205	0.32205	0.32205	0.32205	0.32205	0.32205	0.32205	0.32205	0.32205	0.32205	0.32205	0.32205
79	0.32192	0.32192	0.32192	0.32192	0.32192	0.32192	0.32192	0.32192	0.32192	0.32192	0.32192	0.32192	0.32192	0.32192	0.32192	0.32192	0.32192	0.32192	0.32192	0.32192	0.32192	0.32192	0.32192	0.32192	0.32192	0.32192	0.32192	0.32192	0.32192	0.32192	0.32192	0.32192	0.32192	0.32192	0.32192	0.32192	0.32192	0.32192	0.32192	0.32192	0.32192	0.32192	0.32192	0.32192	0.32192	0.32192	0.32192	0.32192	0.32192
80	0.32183	0.32183	0.32183	0.32183	0.32183	0.32183	0.32183	0.32183	0.32183	0.32183	0.32183	0.32183	0.32183	0.32183	0.32183	0.32183	0.32183	0.32183	0.32183	0.32183	0.32183	0.32183	0.32183	0.32183	0.32183	0.32183	0.32183	0.32183	0.32183	0.32183	0.32183	0.32183	0.32183	0.32183	0.32183	0.32183	0.32183	0.32183	0.32183	0.32183	0.32183	0.32183	0.32183	0.32183	0.32183	0.32183	0.32183	0.32183	0.32183
81	0.32178	0.32178	0.32178	0.32178	0.32178	0.32178	0.32178	0.32178	0.32178	0.32178	0.32178	0.32178	0.32178	0.32178	0.32178	0.32178	0.32178	0.32178	0.32178	0.32178	0.32178	0.32178	0.32178	0.32178	0.32178	0.32178	0.32178	0.32178	0.32178	0.32178	0.32178	0.32178	0.32178	0.32178	0.32178	0.32178	0.32178	0.32178	0.32178	0.32178	0.32178	0.32178	0.32178	0.32178	0.32178	0.32178	0.32178	0.32178	0.32178
82	0.32175	0.32175	0.32175	0.32175	0.32175	0.32175	0.32175	0.32175	0.32175	0.32175	0.32175	0.32175	0.32175	0.32175	0.32175	0.32175	0.32175	0.32175	0.32175	0.32175	0.32175	0.32175	0.32175	0.32175	0.32175	0.32175	0.32175	0.32175	0.32175	0.32175	0.32175	0.32175	0.32175	0.32175	0.32175	0.32175	0.32175	0.32175	0.32175	0.32175	0.32175	0.32175	0.32175	0.32175	0.32175	0.32175	0.32175	0.32175	0.32175
83	0.32175	0.32175	0.32175	0.32175	0.32175	0.32175	0.32175	0.32175	0.32175	0.32175	0.32175	0.32175	0.32175	0.32175	0.32175	0.32175	0.32175	0.32175	0.32175	0.32175	0.32175	0.32175	0.32175	0.32175	0.32175	0.32175	0.32175	0.32175	0.32175	0.32175	0.32175	0.32175	0.32175	0.32175	0.32175	0.32175	0.32175	0.32175	0.32175	0.32175	0.32175	0.32175	0.32175	0.32175	0.32175	0.32175	0.32175	0.32175	0.32175
84	0.32179	0.32179	0.32179	0.32179	0.32179	0.32179	0.32179	0.32179	0.32179	0.32179	0.32179	0.32179	0.32179	0.32179	0.32179	0.32179	0.32179	0.32179	0.32179	0.32179	0.32179	0.32179	0.32179	0.32179	0.32179	0.32179	0.32179	0.32179	0.32179	0.32179	0.32179	0.32179	0.32179	0.32179	0.32179	0.32179	0.32179	0.32179	0.32179	0.32179	0.32179	0.32179	0.32179	0.32179	0.32179	0.32179	0.32179	0.32179	0.32179
85	0.32185	0.32185	0.32185	0.32185	0.32185	0.32185	0.32185	0.32185	0.32185	0.32185	0.32185	0.32185	0.32185	0.32185	0.32185	0.32185	0.32185	0.32185	0.32185	0.32185	0.32185	0.32185	0.32185	0.32185	0.32185	0.32185	0.32185	0.32185	0.32185	0.32185	0.32185	0.32185	0.32185	0.32185	0.32185	0.32185	0.32185	0.32185	0.32185	0.32185	0.32185	0.32185	0.32185	0.32185	0.32185	0.32185	0.32185	0.32185	0.32185
86	0.32193	0.32193	0.32193	0.32193	0.32193	0.32193	0.32193	0.32193	0.32193	0.32193	0.32193	0.32193	0.32193	0.32193	0.32193	0.32193	0.32193	0.32193	0.32193	0.32193	0.32193	0.32193	0.32193	0.32193	0.32193	0.32193	0.32193	0.32193	0.32193	0.32193	0.32193	0.32193	0.32193	0.32193	0.32193	0.32193	0.32193	0.32193	0.32193	0.32193	0.32193	0.32193	0.32193	0.32193	0.32193	0.32193	0.32193	0.32193	0.32193
87	0.32202	0.32202	0.32202	0.32202	0.32202	0.32202	0.32202	0.32202	0.32202	0.32202	0.32202	0.32202	0.32202	0.32202	0.32202	0.32202	0.32202	0.32202	0.32202	0.32202	0.32202	0.32202	0.32202	0.32202	0.32202	0.32202	0.32202	0.32202	0.32202	0.32202	0.32202	0.32202	0.32202	0.32202	0.32202	0.32202	0.32202	0.32202	0.32202	0.32202	0.32202	0.32202	0.32202	0.32202	0.32202	0.32202	0.32202	0.32202	0.32202
88	0.32213	0.32213	0.32213	0.32213	0.32213	0.32213	0.32213	0.32213	0.32213	0.32213	0.32213	0.32213	0.32213	0.32213	0.32213	0.32213	0.32213	0.32213	0.32213	0.32213	0.32213	0.32213	0.32213	0.32213	0.32213	0.32213	0.32213	0.32213	0.32213	0.32213	0.32213	0.32213	0.32213	0.32213	0.32213	0.32213	0.32213	0.32213	0.32213	0.32213	0.32213	0.32213	0.32213	0.32213	0.32213	0.32213	0.32213	0.32213	0.32213
89	0.32225	0.32225	0.32225	0.32225	0.32225	0.32225	0.32225	0.32225	0.32225	0.32225	0.32225	0.32225	0.32225	0.32225	0.32225	0.32225	0.32225	0.32225	0.32225	0.32225	0.32225	0.32225	0.32225	0.32225	0.32225	0.32225	0.32225	0.32225	0.32225	0.32225	0.32225	0.32225	0.32225	0.32225	0.32225	0.32225	0.32225	0.32225	0.32225	0.32225	0.32225	0.32225	0.32225	0.32225	0.32225	0.32225	0.32225	0.32225	0.32225
90	0.32239	0.32239	0.32239	0.32239	0.32239	0.32239	0.32239	0.32239	0.32239	0.32239	0.32239	0.32239	0.32239	0.32239	0.32239	0.32239	0.32239	0.32239	0.32239	0.32239	0.32239	0.32239	0.32239	0.32239	0.32239	0.32239	0.32239	0.32239	0.32239	0.32239	0.32239	0.32239	0.32239	0.32239	0.32239	0.32239	0.32239	0.32239	0.32239	0.32239	0.32239	0.32239	0.32239	0.32239	0.32239	0.32239	0.32239	0.32239	0.32239
91	0.32253	0.32253	0.32253	0.32253	0.32253	0.32253	0.32253	0.32253	0.32253	0.32253	0.32253	0.32253	0.32253	0.32253	0.32253	0.32253	0.32253	0.32253	0.32253	0.32253	0.32253	0.32253	0.32253	0.32253	0.32253	0.32253	0.32253	0.32253	0.32253	0.32253	0.32253	0.32253	0.32253	0.32253	0.32253	0.32253	0.32253	0.32253	0.32253	0.32253	0.32253	0.32253	0.32253	0.32253	0.32253	0.32253	0.32253	0.32253	0.32253
92	0.32269	0.32269	0.32269	0.32269	0.32269	0.32269	0.32269	0.32269	0.32269	0.32269	0.32269	0.32269	0.32269	0.32269	0.32269	0.32269	0.32269	0.32269	0.32269	0.32269	0.32269	0.32269	0.32269	0.32269	0.32269	0.32269	0.32269	0.32269	0.32269	0.32269	0.32269	0.32269	0.32269	0.32269	0.32269	0.32269	0.32269	0.32269	0.32269	0.32269	0.32269	0.32269	0.32269	0.32269	0.32269	0.32269	0.32269	0.32269	0.32269
93	0.32284	0.32284	0.32284	0.32284	0.32284	0.32284	0.32284	0.32284	0.32284	0.32284	0.32284	0.32284	0.32284	0.32284	0.32284	0.32284	0.32284	0.32284	0.32284	0.32284	0.32284	0.32284	0.32284	0.32284	0.32284	0.32284	0.32284	0.32284	0.32284	0.32284	0.32284	0.32284	0.32284	0.32284	0.32284	0.32284	0.32284	0.32284	0.32284	0.32284	0.32284	0.32284	0.32284	0.32284	0.32284	0.32284	0.32284	0.32284	0.32284
94	0.323	0.323	0.323	0.323	0.323	0.323	0.323	0.323	0.323	0.323	0.323	0.323	0.323	0.323	0.323	0.323	0.323	0.323	0.323	0.323	0.323	0.323	0.323	0.323	0.323	0.323	0.323	0.323	0.323	0.323	0.323	0.323	0.323	0.323	0.323	0.323	0.323	0.323	0.323	0.323	0.323	0.323	0.323	0.323	0.323	0.323	0.323	0.323	0.323
95	0.32316	0.32316	0.32316	0.32316	0.32316	0.32316	0.32316	0.32316	0.32316	0.32316	0.32316	0.32316	0.32316	0.32316	0.32316	0.32316	0.32316	0.32316	0.32316	0.32316	0.32316	0.32316	0.32316	0.32316	0.32316	0.32316	0.32316	0.32316	0.32316	0.32316	0.32316	0.32316	0.32316	0.32316	0.32316	0.32316	0.32316	0.32316	0.32316	0.32316	0.32316	0.32316	0.32316	0.32316	0.32316	0.32316	0.32316	0.32316	0.32316
96	0.32331	0.32331	0.32331	0.32331	0.32331	0.32331	0.32331	0.32331	0.32331	0.32331	0.32331	0.32331	0.32331	0.32331	0.32331	0.32331	0.32331	0.32331	0.32331	0.32331	0.32331	0.32331	0.32331	0.32331	0.32331	0.32331	0.32331	0.32331	0.32331	0.32331	0.32331	0.32331	0.32331	0.32331	0.32331	0.32331	0.32331	0.32331	0.32331	0.32331	0.32331	0.32331	0.32331	0.32331	0.32331	0.32331	0.32331	0.32331	0.32331
97	0.32347	0.32347	0.32347	0.32347	0.32347	0.32347	0.32347	0.32347	0.32347	0.32347	0.32347	0.32347	0.32347	0.32347	0.32347	0.32347	0.32347	0.32347	0.32347	0.32347	0.32347	0.32347	0.32347	0.32347	0.32347	0.32347	0.32347	0.32347	0.32347	0.32347	0.32347	0.32347	0.32347	0.32347	0.32347	0.32347	0.32347	0.32347	0.32347	0.32347	0.32347	0.32347	0.32347	0.32347	0.32347	0.32347	0.32347	0.32347	0.32347
98	0.32363	0.32363	0.32363	0.32363	0.32363	0.32363	0.32363	0.32363	0.32363	0.32363	0.32363	0.32363	0.32363	0.32363	0.32363	0.32363	0.32363	0.32363	0.32363	0.32363	0.32363	0.32363	0.32363	0.32363	0.32363	0.32363	0.32363	0.32363	0.32363	0.32363	0.32363	0.32363	0.32363	0.32363	0.32363	0.32363	0.32363	0.32363	0.32363	0.32363	0.32363	0.32363	0.32363	0.32363	0.32363	0.32363	0.32363	0.32363	0.32363
99	0.32377	0.32377	0.32377	0.32377	0.32377	0.32377	0.32377	0.32377	0.32377	0.32377	0.32377	0.32377	0.32377	0.32377	0.32377	0.32377	0.32377	0.32377	0.32377	0.32377	0.32377	0.32377	0.32377	0.32377	0.32377	0.32377	0.32377	0.32377	0.32377	0.32377	0.32377	0.32377	0.32377	0.32377	0.32377	0.32377	0.32377	0.32377	0.32377	0.32377	0.32377	0.32377	0.32377	0.32377	0.32377	0.32377	0.32377	0.32377	0.32377
100	0.32392	0.32392	0.32392	0.32392	0.32392	0.32392	0.32392	0.32392	0.32392	0.32392	0.32392	0.32392	0.32392	0.32392	0.32392	0.32392	0.32392	0.32392	0.32392	0.32392	0.32392	0.32392	0.32392	0.32392	0.32392	0.32392	0.32392	0.32392	0.32392	0.32392	0.32392	0.32392	0.32392	0.32392	0.32392	0.32392	0.32392	0.32392	0.32392	0.32392	0.32392	0.32392	0.32392	0.32392	0.32392	0.32392	0.32392	0.32392	0.32392
101	0.32405	0.32405	0.32405	0.32405	0.32405	0.32405	0.32405	0.32405	0.32405	0.32405	0.32405	0.32405	0.32405	0.32405	0.32405	0.32405	0.32405	0.32405	0.32405	0.32405	0.32405	0.32405	0.32405	0.32405	0.32405	0.32405	0.32405	0.32405	0.32405	0.32405	0.32405	0.32405	0.32405	0.32405	0.32405	0.32405	0.32405	0.32405	0.32405	0.32405	0.32405	0.32405	0.32405	0.32405	0.32405	0.32405	0.32405	0.32405	0.32405
102	0.32419	0.32419	0.32419	0.32419	0.32419	0.32419	0.32419	0.32419	0.32419	0.32419	0.32419	0.32419	0.32419	0.32419	0.32419	0.32419	0.32419	0.32419	0.32419	0.32419	0.32419	0.32419	0.32419	0.32419	0.32419	0.32419	0.32419	0.32419	0.32419	0.32419	0.32419	0.32419	0.32419	0.32419	0.32419	0.32419	0.32419	0.32419	0.32419	0.32419	0.32419	0.32419	0.32419	0.32419	0.32419	0.32419	0.32419	0.32419	0.32419
103	0.32431	0.32431	0.32431	0.32431	0.32431	0.32431	0.32431	0.32431	0.32431	0.32431	0.32431	0.32431	0.32431	0.32431	0.32431	0.32431	0.32431	0.32431	0.32431	0.32431	0.32431	0.32431	0.32431	0.32431	0.32431	0.32431	0.32431	0.32431	0.32431	0.32431	0.32431	0.32431	0.32431	0.32431	0.32431	0.32431	0.32431	0.32431	0.32431	0.32431	0.32431	0.32431	0.32431	0.32431	0.32431	0.32431	0.32431	0.32431	0.32431
104	0.32442	0.32442	0.32442	0.32442	0.32442	0.32442	0.32442	0.32442	0.32442	0.32442	0.32442	0.32442	0.32442	0.32442	0.32442	0.32442	0.32442	0.32442	0.32442	0.32442	0.32442	0.32442	0.32442	0.32442	0.32442	0.32442	0.32442	0.32442	0.32442	0.32442	0.32442	0.32442	0.32442	0.32442	0.32442	0.32442	0.32442	0.32442	0.32442	0.32442	0.32442	0.32442	0.32442	0.32442	0.32442	0.32442	0.32442	0.32442	0.32442
105	0.32453	0.32453	0.32453	0.32453	0.32453	0.32453	0.32453	0.32453	0.32453	0.32453	0.32453	0.32453	0.32453	0.32453	0.32453	0.32453	0.32453	0.32453	0.32453	0.32453	0.32453	0.32453	0.32453	0.32453	0.32453	0.32453	0.32453	0.32453	0.32453	0.32453	0.32453	0.32453	0.32453	0.32453	0.32453	0.32453	0.32453	0.32453	0.32453	0.32453	0.32453	0.32453	0.32453	0.32453	0.32453	0.32453	0.32453	0.32453	0.32453
106	0.32463	0.32463	0.32463	0.32463	0.32463	0.32463	0.32463	0.32463	0.32463	0.32463	0.32463	0.32463	0.32463	0.32463	0.32463	0.32463	0.32463	0.32463	0.32463	0.32463	0.32463	0.32463	0.32463	0.32463	0.32463	0.32463	0.32463	0.32463	0.32463	0.32463	0.32463	0.32463	0.32463	0.32463	0.32463	0.32463	0.32463	0.32463	0.32463	0.32463	0.32463	0.32463	0.32463	0.32463	0.32463	0.32463	0.32463	0.32463	0.32463
107	0.32472	0.32472	0.32472	0.32472	0.32472	0.32472	0.32472	0.32472	0.32472	0.32472	0.32472	0.32472	0.32472	0.32472	0.32472	0.32472	0.32472	0.32472	0.32472	0.32472	0.32472	0.32472	0.32472	0.32472	0.32472	0.32472	0.32472	0.32472	0.32472	0.32472	0.32472	0.32472	0.32472	0.32472	0.32472	0.32472	0.32472	0.32472	0.32472	0.32472	0.32472	0.32472	0.32472	0.32472	0.32472	0.32472	0.32472	0.32472	0.32472
108	0.3248	0.3248	0.3248	0.3248	0.3248	0.3248	0.3248	0.3248	0.3248	0.3248	0.3248	0.3248	0.3248	0.3248	0.3248	0.3248	0.3248	0.3248	0.3248	0.3248	0.3248	0.3248	0.3248	0.3248	0.3248	0.3248	0.3248	0.3248	0.3248	0.3248	0.3248	0.3248	0.3248	0.3248	0.3248	0.3248	0.3248	0.3248	0.3248	0.3248	0.3248	0.3248	0.3248	0.3248	0.3248	0.3248	0.3248	0.3248	0.3248
109	0.32487	0.32487	0.32487	0.32487	0.32487	0.32487	0.32487	0.32487	0.32487	0.32487	0.32487	0.32487	0.32487	0.32487	0.32487	0.32487	0.32487	0.32487	0.32487	0.32487	0.32487	0.32487	0.32487	0.32487	0.32487	0.32487	0.32487	0.32487	0.32487	0.32487	0.32487	0.32487	0.32487	0.32487	0.32487	0.32487	0.32487	0.32487	0.32487	0.32487	0.32487	0.32487	0.32487	0.32487	0.32487	0.32487	0.32487	0.32487	0.32487
110	0.32493	0.32493	0.32493	0.32493	0.32493	0.32493	0.32493	0.32493	0.32493	0.32493	0.32493	0.32493	0.32493	0.32493	0.32493	0.32493	0.32493	0.32493	0.32493	0.32493	0.32493	0.32493	0.32493	0.32493	0.32493	0.32493	0.32493	0.32493	0.32493	0.32493	0.32493	0.32493	0.32493	0.32493	0.32493	0.32493	0.32493	0.32493	0.32493	0.32493	0.32493	0.32493	0.32493	0.32493	0.32493	0.32493	0.32493	0.32493	0.32493
111	0.32498	0.32498	0.32498	0.32498	0.32498	0.32498	0.32498	0.32498	0.32498	0.32498	0.32498	0.32498	0.32498	0.32498	0.32498	0.32498	0.32498	0.32498	0.32498	0.32498	0.32498	0.32498	0.32498	0.32498	0.32498	0.32498	0.32498	0.32498	0.32498	0.32498	0.32498	0.32498	0.32498	0.32498	0.32498	0.32498	0.32498	0.32498	0.32498	0.32498	0.32498	0.32498	0.32498	0.32498	0.32498	0.32498	0.32498	0.32498	0.32498
112	0.32502	0.32502	0.32502	0.32502	0.32502	0.32502	0.32502	0.32502	0.32502	0.32502	0.32502	0.32502	0.32502	0.32502	0.32502	0.32502	0.32502	0.32502	0.32502	0.32502	0.32502	0.32502	0.32502	0.32502	0.32502	0.32502	0.32502	0.32502	0.32502	0.32502	0.32502	0.32502	0.32502	0.32502	0.32502	0.32502	0.32502	0.32502	0.32502	0.32502	0.32502	0.32502	0.32502	0.32502	0.32502	0.32502	0.32502	0.32502	0.32502
113	0.32506	0.32506	0.32506	0.32506	0.32506	0.32506	0.32506	0.32506	0.32506	0.32506	0.32506	0.32506	0.32506	0.32506	0.32506	0.32506	0.32506	0.32506	0.32506	0.32506	0.32506	0.32506	0.32506	0.32506	0.32506	0.32506	0.32506	0.32506	0.32506	0.32506	0.32506	0.32506	0.32506	0.32506	0.32506	0.32506	0.32506	0.32506	0.32506	0.32506	0.32506	0.32506	0.32506	0.32506	0.32506	0.32506	0.32506	0.32506	0.32506
114	0.32508	0.32508	0.32508	0.32508	0.32508	0.32508	0.32508	0.32508	0.32508	0.32508	0.32508	0.32508	0.32508	0.32508	0.32508	0.32508	0.32508	0.32508	0.32508	0.32508	0.32508	0.32508	0.32508	0.32508	0.32508	0.32508	0.32508	0.32508	0.32508	0.32508	0.32508	0.32508	0.32508	0.32508	0.32508	0.32508	0.32508	0.32508	0.32508	0.32508	0.32508	0.32508	0.32508	0.32508	0.32508	0.32508	0.32508	0.32508	0.32508
115	0.3251	0.3251	0.3251	0.3251	0.3251	0.3251	0.3251	0.3251	0.3251	0.3251	0.3251	0.3251	0.3251	0.3251	0.3251	0.3251	0.3251	0.3251	0.3251	0.3251	0.3251	0.3251	0.3251	0.3251	0.3251	0.3251	0.3251	0.3251	0.3251	0.3251	0.3251	0.3251	0.3251	0.3251	0.3251	0.3251	0.3251	0.3251	0.3251	0.3251	0.3251	0.3251	0.3251	0.3251	0.3251	0.3251	0.3251	0.3251	0.3251
116	0.32512	0.32512	0.32512	0.32512	0.32512	0.32512	0.32512	0.32512	0.32512	0.32512	0.32512	0.32512	0.32512	0.32512	0.32512	0.32512	0.32512	0.32512	0.32512	0.32512	0.32512	0.32512	0.32512	0.32512	0.32512	0.32512	0.32512	0.32512	0.32512	0.32512	0.32512	0.32512	0.32512	0.32512	0.32512	0.32512	0.32512	0.32512	0.32512	0.32512	0.32512	0.32512	0.32512	0.32512	0.32512	0.32512	0.32512	0.32512	0.32512
117	0.32512	0.32512	0.32512	0.32512	0.32512	0.32512	0.32512	0.32512	0.32512	0.32512	0.32512	0.32512	0.32512	0.32512	0.32512	0.32512	0.32512	0.32512	0.32512	0.32512	0.32512	0.32512	0.32512	0.32512	0.32512	0.32512	0.32512	0.32512	0.32512	0.32512	0.32512	0.32512	0.32512	0.32512	0.32512	0.32512	0.32512	0.32512	0.32512	0.32512	0.32512	0.32512	0.32512	0.32512	0.32512	0.32512	0.32512	0.32512	0.32512
118	0.32512	0.32512	0.32512	0.32512	0.32512	0.32512	0.32512	0.32512	0.32512	0.32512	0.32512	0.32512	0.32512	0.32512	0.32512	0.32512	0.32512	0.32512	0.32512	0.32512	0.32512	0.32512	0.32512	0.32512	0.32512	0.32512	0.32512	0.32512	0.32512	0.32512	0.32512	0.32512	0.32512	0.32512	0.32512	0.32512	0.32512	0.32512	0.32512	0.32512	0.32512	0.32512	0.32512	0.32512	0.32512	0.32512	0.32512	0.32512	0.32512
119	0.32511	0.32511	0.32511	0.32511	0.32511	0.32511	0.32511	0.32511	0.32511	0.32511	0.32511	0.32511	0.32511	0.32511	0.32511	0.32511	0.32511	0.32511	0.32511	0.32511	0.32511	0.32511	0.32511	0.32511	0.32511	0.32511	0.32511	0.32511	0.32511	0.32511	0.32511	0.32511	0.32511	0.32511	0.32511	0.32511	0.32511	0.32511	0.32511	0.32511	0.32511	0.32511	0.32511	0.32511	0.32511	0.32511	0.32511	0.32511	0.32511
120	0.3251	0.3251	0.3251	0.3251	0.3251	0.3251	0.3251	0.3251	0.3251	0.3251	0.3251	0.3251	0.3251	0.3251	0.3251	0.3251	0.3251	0.3251	0.3251	0.3251	0.3251	0.3251	0.3251	0.3251	0.3251	0.3251	0.3251	0.3251	0.3251	0.3251	0.3251	0.3251	0.3251	0.3251	0.3251	0.3251	0.3251	0.3251	0.3251	0.3251	0.3251	0.3251	0.3251	0.3251	0.3251	0.3251	0.3251	0.3251	0.3251
121	0.32508	0.32508	0.32508	0.32508	0.32508	0.32508	0.32508	0.32508	0.32508	0.32508	0.32508	0.32508	0.32508	0.32508	0.32508	0.32508	0.32508	0.32508	0.32508	0.32508	0.32508	0.32508	0.32508	0.32508	0.32508	0.32508	0.32508	0.32508	0.32508	0.32508	0.32508	0.32508	0.32508	0.32508	0.32508	0.32508	0.32508	0.32508	0.32508	0.32508	0.32508	0.32508	0.32508	0.32508	0.32508	0.32508	0.32508	0.32508	0.32508
122	0.32506	0.32506	0.32506	0.32506	0.32506	0.32506	0.32506	0.32506	0.32506	0.32506	0.32506	0.32506	0.32506	0.32506	0.32506	0.32506	0.32506	0.32506	0.32506	0.32506	0.32506	0.32506	0.32506	0.32506	0.32506	0.32506	0.32506	0.32506	0.32506	0.32506	0.32506	0.32506	0.32506	0.32506	0.32506	0.32506	0.32506	0.32506	0.32506	0.32506	0.32506	0.32506	0.32506	0.32506	0.32506	0.32506	0.32506	0.32506	0.32506
123	0.32504	0.32504	0.32504	0.32504	0.32504	0.32504	0.32504	0.32504	0.32504	0.32504	0.32504	0.32504	0.32504	0.32504	0.32504	0.32504	0.32504	0.32504	0.32504	0.32504	0.32504	0.32504	0.32504	0.32504	0.32504	0.32504	0.32504	0.32504	0.32504	0.32504	0.32504	0.32504	0.32504	0.32504	0.32504	0.32504	0.32504	0.32504	0.32504	0.32504	0.32504	0.32504	0.32504	0.32504	0.32504	0.32504	0.32504	0.32504	0.32504
124	0.32501	0.32501	0.32501	0.32501	0.32501	0.32501	0.32501	0.32501	0.32501	0.32501	0.32501	0.32501	0.32501	0.32501	0.32501	0.32501	0.32501	0.32501	0.32501	0.32501	0.32501	0.32501	0.32501	0.32501	0.32501	0.32501	0.32501	0.32501	0.32501	0.32501	0.32501	0.32501	0.32501	0.32501	0.32501	0.32501	0.32501	0.32501	0.32501	0.32501	0.32501	0.32501	0.32501	0.32501	0.32501	0.32501	0.32501	0.32501	0.32501
125	0.32498	0.32498	0.32498	0.32498	0.32498	0.32498	0.32498	0.32498	0.32498	0.32498	0.32498	0.32498	0.32498	0.32498	0.32498	0.32498	0.32498	0.32498	0.32498	0.32498	0.32498	0.32498	0.32498	0.32498	0.32498	0.32498	0.32498	0.32498	0.32498	0.32498	0.32498	0.32498	0.32498	0.32498	0.32498	0.32498	0.32498	0.32498	0.32498	0.32498	0.32498	0.32498	0.32498	0.32498	0.32498	0.32498	0.32498	0.32498	0.32498
126	0.32495	0.32495	0.32495	0.32495	0.32495	0.32495	0.32495	0.32495	0.32495	0.32495	0.32495	0.32495	0.32495	0.32495	0.32495	0.32495	0.32495	0.32495	0.32495	0.32495	0.32495	0.32495	0.32495	0.32495	0.32495	0.32495	0.32495	0.32495	0.32495	0.32495	0.32495	0.32495	0.32495	0.32495	0.32495	0.32495	0.32495	0.32495	0.32495	0.32495	0.32495	0.32495	0.32495	0.32495	0.32495	0.32495	0.32495	0.32495	0.32495
127	0.32492	0.32492	0.32492	0.32492	0.32492	0.32492	0.32492	0.32492	0.32492	0.32492	0.32492	0.32492	0.32492	0.32492	0.32492	0.32492	0.32492	0.32492	0.32492	0.32492	0.32492	0.32492	0.32492	0.32492	0.32492	0.32492	0.32492	0.32492	0.32492	0.32492	0.32492	0.32492	0.32492	0.32492	0.32492	0.32492	0.32492	0.32492	0.32492	0.32492	0.32492	0.32492	0.32492	0.32492	0.32492	0.32492	0.32492	0.32492	0.32492
128	0.32488	0.32488	0.32488	0.32488	0.32488	0.32488	0.32488	0.32488	0.32488	0.32488	0.32488	0.32488	0.32488	0.32488	0.32488	0.32488	0.32488	0.32488	0.32488	0.32488	0.32488	0.32488	0.32488	0.32488	0.32488	0.32488	0.32488	0.32488	0.32488	0.32488	0.32488	0.32488	0.32488	0.32488	0.32488	0.32488	0.32488	0.32488	0.32488	0.32488	0.32488	0.32488	0.32488	0.32488	0.32488	0.32488	0.32488	0.32488	0.32488
129	0.32485	0.32485	0.32485	0.32485	0.32485	0.32485	0.32485	0.32485	0.32485	0.32485	0.32485	0.32485	0.32485	0.32485	0.32485	0.32485	0.32485	0.32485	0.32485	0.32485	0.32485	0.32485	0.32485	0.32485	0.32485	0.32485	0.32485	0.32485	0.32485	0.32485	0.32485	0.32485	0.32485	0.32485	0.32485	0.32485	0.32485	0.32485	0.32485	0.32485	0.32485	0.32485	0.32485	0.32485	0.32485	0.32485	0.32485	0.32485	0.32485
130	0.32482	0.32482	0.32482	0.32482	0.32482	0.32482	0.32482	0.32482	0.32482	0.32482	0.32482	0.32482	0.32482	0.32482	0.32482	0.32482	0.32482	0.32482	0.32482	0.32482	0.32482	0.32482	0.32482	0.32482	0.32482	0.32482	0.32482	0.32482	0.32482	0.32482	0.32482	0.32482	0.32482	0.32482	0.32482	0.32482	0.32482	0.32482	0.32482	0.32482	0.32482	0.32482	0.32482	0.32482	0.32482	0.32482	0.32482	0.32482	0.32482
131	0.32479	0.32479	0.32479	0.32479	0.32479	0.32479	0.32479	0.32479	0.32479	0.32479	0.32479	0.32479	0.32479	0.32479	0.32479	0.32479	0.32479	0.32479	0.32479	0.32479	0.32479	0.32479	0.32479	0.32479	0.32479	0.32479	0.32479	0.32479	0.32479	0.32479	0.32479	0.32479	0.32479	0.32479	0.32479	0.32479	0.32479	0.32479	0.32479	0.32479	0.32479	0.32479	0.32479	0.32479	0.32479	0.32479	0.32479	0.32479	0.32479
132	0.32476	0.32476	0.32476	0.32476	0.32476	0.32476	0.32476	0.32476	0.32476	0.32476	0.32476	0.32476	0.32476	0.32476	0.32476	0.32476	0.32476	0.32476	0.32476	0.32476	0.32476	0.32476	0.32476	0.32476	0.32476	0.32476	0.32476	0.32476	0.32476	0.32476	0.32476	0.32476	0.32476	0.32476	0.32476	0.32476	0.32476	0.32476	0.32476	0.32476	0.32476	0.32476	0.32476	0.32476	0.32476	0.32476	0.32476	0.32476	0.32476
133	0.32472	0.32472	0.32472	0.32472	0.32472	0.32472	0.32472	0.32472	0.32472	0.32472	0.32472	0.32472	0.32472	0.32472	0.32472	0.32472	0.32472	0.32472	0.32472	0.32472	0.32472	0.32472	0.32472	0.32472	0.32472	0.32472	0.32472	0.32472	0.32472	0.32472	0.32472	0.32472	0.32472	0.32472	0.32472	0.32472	0.32472	0.32472	0.32472	0.32472	0.32472	0.32472	0.32472	0.32472	0.32472	0.32472	0.32472	0.32472	0.32472
134	0.32469	0.32469	0.32469	0.32469	0.32469	0.32469	0.32469	0.32469	0.32469	0.32469	0.32469	0.32469	0.32469	0.32469	0.32469	0.32469	0.32469	0.32469	0.32469	0.32469	0.32469	0.32469	0.32469	0.32469	0.32469	0.32469	0.32469	0.32469	0.32469	0.32469	0.32469	0.32469	0.32469	0.32469	0.32469	0.32469	0.32469	0.32469	0.32469	0.32469	0.32469	0.32469	0.32469	0.32469	0.32469	0.32469	0.32469	0.32469	0.32469
135	0.32467	0.32467	0.32467	0.32467	0.32467	0.32467	0.32467	0.32467	0.32467	0.32467	0.32467	0.32467	0.32467	0.32467	0.32467	0.32467	0.32467	0.32467	0.32467	0.32467	0.32467	0.32467	0.32467	0.32467	0.32467	0.32467	0.32467	0.32467	0.32467	0.32467	0.32467	0.32467	0.32467	0.32467	0.32467	0.32467	0.32467	0.32467	0.32467	0.32467	0.32467	0.32467	0.32467	0.32467	0.32467	0.32467	0.32467	0.32467	0.32467
136	0.32464	0.32464	0.32464	0.32464	0.32464	0.32464	0.32464	0.32464	0.32464	0.32464	0.32464	0.32464	0.32464	0.32464	0.32464	0.32464	0.32464	0.32464	0.32464	0.32464	0.32464	0.32464	0.32464	0.32464	0.32464	0.32464	0.32464	0.32464	0.32464	0.32464	0.32464	0.32464	0.32464	0.32464	0.32464	0.32464	0.32464	0.32464	0.32464	0.32464	0.32464	0.32464	0.32464	0.32464	0.32464	0.32464	0.32464	0.32464	0.32464
137	0.32462	0.32462	0.32462	0.32462	0.32462	0.32462	0.32462	0.32462	0.32462	0.32462	0.32462	0.32462	0.32462	0.32462	0.32462	0.32462	0.32462	0.32462	0.32462	0.32462	0.32462	0.32462	0.32462	0.32462	0.32462	0.32462	0.32462	0.32462	0.32462	0.32462	0.32462	0.32462	0.32462	0.32462	0.32462	0.32462	0.32462	0.32462	0.32462	0.32462	0.32462	0.32462	0.32462	0.32462	0.32462	0.32462	0.32462	0.32462	0.32462
138	0.3246	0.3246	0.3246	0.3246	0.3246	0.3246	0.3246	0.3246	0.3246	0.3246	0.3246	0.3246	0.3246	0.3246	0.3246	0.3246	0.3246	0.3246	0.3246	0.3246	0.3246	0.3246	0.3246	0.3246	0.3246	0.3246	0.3246	0.3246	0.3246	0.3246	0.3246	0.3246	0.3246	0.3246	0.3246	0.3246	0.3246	0.3246	0.3246	0.3246	0.3246	0.3246	0.3246	0.3246	0.3246	0.3246	0.3246	0.3246	0.3246
139	0.32458	0.32458	0.32458	0.32458	0.32458	0.32458	0.32458	0.32458	0.32458	0.32458	0.32458	0.32458	0.32458	0.32458	0.32458	0.32458	0.32458	0.32458	0.32458	0.32458	0.32458	0.32458	0.32458	0.32458	0.32458	0.32458	0.32458	0.32458	0.32458	0.32458	0.32458	0.32458	0.32458	0.32458	0.32458	0.32458	0.32458	0.32458	0.32458	0.32458	0.32458	0.32458	0.32458	0.32458	0.32458	0.32458	0.32458	0.32458	0.32458
140	0.32456	0.32456	0.32456	0.32456	0.32456	0.32456	0.32456	0.32456	0.32456	0.32456	0.32456	0.32456	0.32456	0.32456	0.32456	0.32456	0.32456	0.32456	0.32456	0.32456	0.32456	0.32456	0.32456	0.32456	0.32456	0.32456	0.32456	0.32456	0.32456	0.32456	0.32456	0.32456	0.32456	0.32456	0.32456	0.32456	0.32456	0.32456	0.32456	0.32456	0.32456	0.32456	0.32456	0.32456	0.32456	0.32456	0.32456	0.32456	0.32456
141	0.32454	0.32454	0.32454	0.32454	0.32454	0.32454	0.32454	0.32454	0.32454	0.32454	0.32454	0.32454	0.32454	0.32454	0.32454	0.32454	0.32454	0.32454	0.32454	0.32454	0.32454	0.32454	0.32454	0.32454	0.32454	0.32454	0.32454	0.32454	0.32454	0.32454	0.32454	0.32454	0.32454	0.32454	0.32454	0.32454	0.32454	0.32454	0.32454	0.32454	0.32454	0.32454	0.32454	0.32454	0.32454	0.32454	0.32454	0.32454	0.32454
142	0.32453	0.32453	0.32453	0.32453	0.32453	0.32453	0.32453	0.32453	0.32453	0.32453	0.32453	0.32453	0.32453	0.32453	0.32453	0.32453	0.32453	0.32453	0.32453	0.32453	0.32453	0.32453	0.32453	0.32453	0.32453	0.32453	0.32453	0.32453	0.32453	0.32453	0.32453	0.32453	0.32453	0.32453	0.32453	0.32453	0.32453	0.32453	0.32453	0.32453	0.32453	0.32453	0.32453	0.32453	0.32453	0.32453	0.32453	0.32453	0.32453
143	0.32451	0.32451	0.32451	0.32451	0.32451	0.32451	0.32451	0.32451	0.32451	0.32451	0.32451	0.32451	0.32451	0.32451	0.32451	0.32451	0.32451	0.32451	0.32451	0.32451	0.32451	0.32451	0.32451	0.32451	0.32451	0.32451	0.32451	0.32451	0.32451	0.32451	0.32451	0.32451	0.32451	0.32451	0.32451	0.32451	0.32451	0.32451	0.32451	0.32451	0.32451	0.32451	0.32451	0.32451	0.32451	0.32451	0.32451	0.32451	0.32451
144	0.3245	0.3245	0.3245	0.3245	0.3245	0.3245	0.3245	0.3245	0.3245	0.3245	0.3245	0.3245	0.3245	0.3245	0.3245	0.3245	0.3245	0.3245	0.3245	0.3245	0.3245	0.3245	0.3245	0.3245	0.3245	0.3245	0.3245	0.3245	0.3245	0.3245	0.3245	0.3245	0.3245	0.3245	0.3245	0.3245	0.3245	0.3245	0.3245	0.3245	0.3245	0.3245	0.3245	0.3245	0.3245	0.3245	0.3245	0.3245	0.3245
145	0.3245	0.3245	0.3245	0.3245	0.3245	0.3245	0.3245	0.3245	0.3245	0.3245	0.3245	0.3245	0.3245	0.3245	0.3245	0.3245	0.3245	0.3245	0.3245	0.3245	0.3245	0.3245	0.3245	0.3245	0.3245	0.3245	0.3245	0.3245	0.3245	0.3245	0.3245	0.3245	0.3245	0.3245	0.3245	0.3245	0.3245	0.3245	0.3245	0.3245	0.3245	0.3245	0.3245	0.3245	0.3245	0.3245	0.3245	0.3245	0.3245
146	0.32449	0.32449	0.32449	0.32449	0.32449	0.32449	0.32449	0.32449	0.32449	0.32449	0.32449	0.32449	0.32449	0.32449	0.32449	0.32449	0.32449	0.32449	0.32449	0.32449	0.32449	0.32449	0.32449	0.32449	0.32449	0.32449	0.32449	0.32449	0.32449	0.32449	0.32449	0.32449	0.32449	0.32449	0.32449	0.32449	0.32449	0.32449	0.32449	0.32449	0.32449	0.32449	0.32449	0.32449	0.32449	0.32449	0.32449	0.32449	0.32449
147	0.32448	0.32448	0.32448	0.32448	0.32448	0.32448	0.32448	0.32448	0.32448	0.32448	0.32448	0.32448	0.32448	0.32448	0.32448	0.32448	0.32448	0.32448	0.32448	0.32448	0.32448	0.32448	0.32448	0.32448	0.32448	0.32448	0.32448	0.32448	0.32448	0.32448	0.32448	0.32448	0.32448	0.32448	0.32448	0.32448	0.32448	0.32448	0.32448	0.32448	0.32448	0.32448	0.32448	0.32448	0.32448	0.32448	0.32448	0.32448	0.32448
148	0.32448	0.32448	0.32448	0.32448	0.32448	0.32448	0.32448	0.32448	0.32448	0.32448	0.32448	0.32448	0.32448	0.32448	0.32448	0.32448	0.32448	0.32448	0.32448	0.32448	0.32448	0.32448	0.32448	0.32448	0.32448	0.32448	0.32448	0.32448	0.32448	0.32448	0.32448	0.32448	0.32448	0.32448	0.32448	0.32448	0.32448	0.32448	0.32448	0.32448	0.32448	0.32448	0.32448	0.32448	0.32448	0.32448	0.32448	0.32448	0.32448
149	0.32448	0.32448	0.32448	0.32448	0.32448	0.32448	0.32448	0.32448	0.32448	0.32448	0.32448	0.32448	0.32448	0.32448	0.32448	0.32448	0.32448	0.32448	0.32448	0.32448	0.32448	0.32448	0.32448	0.32448	0.32448	0.32448	0.32448	0.32448	0.32448	0.32448	0.32448	0.32448	0.32448	0.32448	0.32448	0.32448	0.32448	0.32448	0.32448	0.32448	0.32448	0.32448	0.32448	0.32448	0.32448	0.32448	0.32448	0.32448	0.32448
150	0.32448	0.32448	0.32448	0.32448	0.32448	0.32448	0.32448	0.32448	0.32448	0.32448	0.32448	0.32448	0.32448	0.32448	0.32448	0.32448	0.32448	0.32448	0.32448	0.32448	0.32448	0.32448	0.32448	0.32448	0.32448	0.32448	0.32448	0.32448	0.32448	0.32448	0.32448	0.32448	0.32448	0.32448	0.32448	0.32448	0.32448	0.32448	0.32448	0.32448	0.32448	0.32448	0.32448	0.32448	0.32448	0.32448	0.32448	0.32448	0.32448
151	0.32448	0.32448	0.32448	0.32448	0.32448	0.32448	0.32448	0.32448	0.32448	0.32448	0.32448	0.32448	0.32448	0.32448	0.32448	0.32448	0.32448	0.32448	0.32448	0.32448	0.32448	0.32448	0.32448	0.32448	0.32448	0.32448	0.32448	0.32448	0.32448	0.32448	0.32448	0.32448	0.32448	0.32448	0.32448	0.32448	0.32448	0.32448	0.32448	0.32448	0.32448	0.32448	0.32448	0.32448	0.32448	0.32448	0.32448	0.32448	0.32448
152	0.32449	0.32449	0.32449	0.32449	0.32449	0.32449	0.32449	0.32449	0.32449	0.32449	0.32449	0.32449	0.32449	0.32449	0.32449	0.32449	0.32449	0.32449	0.32449	0.32449	0.32449	0.32449	0.32449	0.32449	0.32449	0.32449	0.32449	0.32449	0.32449	0.32449	0.32449	0.32449	0.32449	0.32449	0.32449	0.32449	0.32449	0.32449	0.32449	0.32449	0.32449	0.32449	0.32449	0.32449	0.32449	0.32449	0.32449	0.32449	0.32449
153	0.32449	0.32449	0.32449	0.32449	0.32449	0.32449	0.32449	0.32449	0.32449	0.32449	0.32449	0.32449	0.32449	0.32449	0.32449	0.32449	0.32449	0.32449	0.32449	0.32449	0.32449	0.32449	0.32449	0.32449	0.32449	0.32449	0.32449	0.32449	0.32449	0.32449	0.32449	0.32449	0.32449	0.32449	0.32449	0.32449	0.32449	0.32449	0.32449	0.32449	0.32449	0.32449	0.32449	0.32449	0.32449	0.32449	0.32449	0.32449	0.32449
154	0.32449	0.32449	0.32449	0.32449	0.32449	0.32449	0.32449	0.32449	0.32449	0.32449	0.32449	0.32449	0.32449	0.32449	0.32449	0.32449	0.32449	0.32449	0.32449	0.32449	0.32449	0.32449	0.32449	0.32449	0.32449	0.32449	0.32449	0.32449	0.32449	0.32449	0.32449	0.32449	0.32449	0.32449	0.32449	0.32449	0.32449	0.32449	0.32449	0.32449	0.32449	0.32449	0.32449	0.32449	0.32449	0.32449	0.32449	0.32449	0.32449
155	0.3245	0.3245	0.3245	0.3245	0.3245	0.3245	0.3245	0.3245	0.3245	0.3245	0.3245	0.3245	0.3245	0.3245	0.3245	0.3245	0.3245	0.3245	0.3245	0.3245	0.3245	0.3245	0.3245	0.3245	0.3245	0.3245	0.3245	0.3245	0.3245	0.3245	0.3245	0.3245	0.3245	0.3245	0.3245	0.3245	0.3245	0.3245	0.3245	0.3245	0.3245	0.3245	0.3245	0.3245	0.3245	0.3245	0.3245	0.3245	0.3245
156	0.3245	0.3245	0.3245	0.3245	0.3245	0.3245	0.3245	0.3245	0.3245	0.3245	0.3245	0.3245	0.3245	0.3245	0.3245	0.3245	0.3245	0.3245	0.3245	0.3245	0.3245	0.3245	0.3245	0.3245	0.3245	0.3245	0.3245	0.3245	0.3245	0.3245	0.3245	0.3245	0.3245	0.3245	0.3245	0.3245	0.3245	0.3245	0.3245	0.3245	0.3245	0.3245	0.3245	0.3245	0.3245	0.3245	0.3245	0.3245	0.3245
157	0.32451	0.32451	0.32451	0.32451	0.32451	0.32451	0.32451	0.32451	0.32451	0.32451	0.32451	0.32451	0.32451	0.32451	0.32451	0.32451	0.32451	0.32451	0.32451	0.32451	0.32451	0.32451	0.32451	0.32451	0.32451	0.32451	0.32451	0.32451	0.32451	0.32451	0.32451	0.32451	0.32451	0.32451	0.32451	0.32451	0.32451	0.32451	0.32451	0.32451	0.32451	0.32451	0.32451	0.32451	0.32451	0.32451	0.32451	0.32451	0.32451
158	0.32452	0.32452	0.32452	0.32452	0.32452	0.32452	0.32452	0.32452	0.32452	0.32452	0.32452	0.32452	0.32452	0.32452	0.32452	0.32452	0.32452	0.32452	0.32452	0.32452	0.32452	0.32452	0.32452	0.32452	0.32452	0.32452	0.32452	0.32452	0.32452	0.32452	0.32452	0.32452	0.32452	0.32452	0.32452	0.32452	0.32452	0.32452	0.32452	0.32452	0.32452	0.32452	0.32452	0.32452	0.32452	0.32452	0.32452	0.32452	0.32452
159	0.32452	0.32452	0.32452	0.32452	0.32452	0.32452	0.32452	0.32452	0.32452	0.32452	0.32452	0.32452	0.32452	0.32452	0.32452	0.32452	0.32452	0.32452	0.32452	0.32452	0.32452	0.32452	0.32452	0.32452	0.32452	0.32452	0.32452	0.32452	0.32452	0.32452	0.32452	0.32452	0.32452	0.32452	0.32452	0.32452	0.32452	0.32452	0.32452	0.32452	0.32452	0.32452	0.32452	0.32452	0.32452	0.32452	0.32452	0.32452	0.32452
160	0.32453	0.32453	0.32453	0.32453	0.32453	0.32453	0.32453	0.32453	0.32453	0.32453	0.32453	0.32453	0.32453	0.32453	0.32453	0.32453	0.32453	0.32453	0.32453	0.32453	0.32453	0.32453	0.32453	0.32453	0.32453	0.32453	0.32453	0.32453	0.32453	0.32453	0.32453	0.32453	0.32453	0.32453	0.32453	0.32453	0.32453	0.32453	0.32453	0.32453	0.32453	0.32453	0.32453	0.32453	0.32453	0.32453	0.32453	0.32453	0.32453
161	0.32454	0.32454	0.32454	0.32454	0.32454	0.32454	0.32454	0.32454	0.32454	0.32454	0.32454	0.32454	0.32454	0.32454	0.32454	0.32454	0.32454	0.32454	0.32454	0.32454	0.32454	0.32454	0.32454	0.32454	0.32454	0.32454	0.32454	0.32454	0.32454	0.32454	0.32454	0.32454	0.32454	0.32454	0.32454	0.32454	0.32454	0.32454	0.32454	0.32454	0.32454	0.32454	0.32454	0.32454	0.32454	0.32454	0.32454	0.32454	0.32454
162	0.32454	0.32454	0.32454	0.32454	0.32454	0.32454	0.32454	0.32454	0.32454	0.32454	0.32454	0.32454	0.32454	0.32454	0.32454	0.32454	0.32454	0.32454	0.32454	0.32454	0.32454	0.32454	0.32454	0.32454	0.32454	0.32454	0.32454	0.32454	0.32454	0.32454	0.32454	0.32454	0.32454	0.32454	0.32454	0.32454	0.32454	0.32454	0.32454	0.32454	0.32454	0.32454	0.32454	0.32454	0.32454	0.32454	0.32454	0.32454	0.32454
163	0.32455	0.32455	0.32455	0.32455	0.32455	0.32455	0.32455	0.32455	0.32455	0.32455	0.32455	0.32455	0.32455	0.32455	0.32455	0.32455	0.32455	0.32455	0.32455	0.32455	0.32455	0.32455	0.32455	0.32455	0.32455	0.32455	0.32455	0.32455	0.32455	0.32455	0.32455	0.32455	0.32455	0.32455	0.32455	0.32455	0.32455	0.32455	0.32455	0.32455	0.32455	0.32455	0.32455	0.32455	0.32455	0.32455	0.32455	0.32455	0.32455
164	0.32455	0.32455	0.32455	0.32455	0.32455	0.32455	0.32455	0.32455	0.32455	0.32455	0.32455	0.32455	0.32455	0.32455	0.32455	0.32455	0.32455	0.32455	0.32455	0.32455	0.32455	0.32455	0.32455	0.32455	0.32455	0.32455	0.32455	0.32455	0.32455	0.32455	0.32455	0.32455	0.32455	0.32455	0.32455	0.32455	0.32455	0.32455	0.32455	0.32455	0.32455	0.32455	0.32455	0.32455	0.32455	0.32455	0.32455	0.32455	0.32455
165	0.32456	0.32456	0.32456	0.32456	0.32456	0.32456	0.32456	0.32456	0.32456	0.32456	0.32456	0.32456	0.32456	0.32456	0.32456	0.32456	0.32456	0.32456	0.32456	0.32456	0.32456	0.32456	0.32456	0.32456	0.32456	0.32456	0.32456	0.32456	0.32456	0.32456	0.32456	0.32456	0.32456	0.32456	0.32456	0.32456	0.32456	0.32456	0.32456	0.32456	0.32456	0.32456	0.32456	0.32456	0.32456	0.32456	0.32456	0.32456	0.32456
166	0.32456	0.32456	0.32456	0.32456	0.32456	0.32456	0.32456	0.32456	0.32456	0.32456	0.32456	0.32456	0.32456	0.32456	0.32456	0.32456	0.32456	0.32456	0.32456	0.32456	0.32456	0.32456	0.32456	0.32456	0.32456	0.32456	0.32456	0.32456	0.32456	0.32456	0.32456	0.32456	0.32456	0.32456	0.32456	0.32456	0.32456	0.32456	0.32456	0.32456	0.32456	0.32456	0.32456	0.32456	0.32456	0.32456	0.32456	0.32456	0.32456
167	0.32457	0.32457	0.32457	0.32457	0.32457	0.32457	0.32457	0.32457	0.32457	0.32457	0.32457	0.32457	0.32457	0.32457	0.32457	0.32457	0.32457	0.32457	0.32457	0.32457	0.32457	0.32457	0.32457	0.32457	0.32457	0.32457	0.32457	0.32457	0.32457	0.32457	0.32457	0.32457	0.32457	0.32457	0.32457	0.32457	0.32457	0.32457	0.32457	0.32457	0.32457	0.32457	0.32457	0.32457	0.32457	0.32457	0.32457	0.32457	0.32457
168	0.32457	0.32457	0.32457	0.32457	0.32457	0.32457	0.32457	0.32457	0.32457	0.32457	0.32457	0.32457	0.32457	0.32457	0.32457	0.32457	0.32457	0.32457	0.32457	0.32457	0.32457	0.32457	0.32457	0.32457	0.32457	0.32457	0.32457	0.32457	0.32457	0.32457	0.32457	0.32457	0.32457	0.32457	0.32457	0.32457	0.32457	0.32457	0.32457	0.32457	0.32457	0.32457	0.32457	0.32457	0.32457	0.32457	0.32457	0.32457	0.32457
169	0.32457	0.32457	0.32457	0.32457	0.32457	0.32457	0.32457	0.32457	0.32457	0.32457	0.32457	0.32457	0.32457	0.32457	0.32457	0.32457	0.32457	0.32457	0.32457	0.32457	0.32457	0.32457	0.32457	0.32457	0.32457	0.32457	0.32457	0.32457	0.32457	0.32457	0.32457	0.32457	0.32457	0.32457	0.32457	0.32457	0.32457	0.32457	0.32457	0.32457	0.32457	0.32457	0.32457	0.32457	0.32457	0.32457	0.32457	0.32457	0.32457
170	0.32458	0.32458	0.32458	0.32458	0.32458	0.32458	0.32458	0.32458	0.32458	0.32458	0.32458	0.32458	0.32458	0.32458	0.32458	0.32458	0.32458	0.32458	0.32458	0.32458	0.32458	0.32458	0.32458	0.32458	0.32458	0.32458	0.32458	0.32458	0.32458	0.32458	0.32458	0.32458	0.32458	0.32458	0.32458	0.32458	0.32458	0.32458	0.32458	0.32458	0.32458	0.32458	0.32458	0.32458	0.32458	0.32458	0.32458	0.32458	0.32458
171	0.32458	0.32458	0.32458	0.32458	0.32458	0.32458	0.32458	0.32458	0.32458	0.32458	0.32458	0.32458	0.32458	0.32458	0.32458	0.32458	0.32458	0.32458	0.32458	0.32458	0.32458	0.32458	0.32458	0.32458	0.32458	0.32458	0.32458	0.32458	0.32458	0.32458	0.32458	0.32458	0.32458	0.32458	0.32458	0.32458	0.32458	0.32458	0.32458	0.32458	0.32458	0.32458	0.32458	0.32458	0.32458	0.32458	0.32458	0.32458	0.32458
172	0.32458	0.32458	0.32458	0.32458	0.32458	0.32458	0.32458	0.32458	0.32458	0.32458	0.32458	0.32458	0.32458	0.32458	0.32458	0.32458	0.32458	0.32458	0.32458	0.32458	0.32458	0.32458	0.32458	0.32458	0.32458	0.32458	0.32458	0.32458	0.32458	0.32458	0.32458	0.32458	0.32458	0.32458	0.32458	0.32458	0.32458	0.32458	0.32458	0.32458	0.32458	0.32458	0.32458	0.32458	0.32458	0.32458	0.32458	0.32458	0.32458
173	0.32458	0.32458	0.32458	0.32458	0.32458	0.32458	0.32458	0.32458	0.32458	0.32458	0.32458	0.32458	0.32458	0.32458	0.32458	0.32458	0.32458	0.32458	0.32458	0.32458	0.32458	0.32458	0.32458	0.32458	0.32458	0.32458	0.32458	0.32458	0.32458	0.32458	0.32458	0.32458	0.32458	0.32458	0.32458	0.32458	0.32458	0.32458	0.32458	0.32458	0.32458	0.32458	0.32458	0.32458	0.32458	0.32458	0.32458	0.32458	0.32458
174	0.32458	0.32458	0.32458	0.32458	0.32458	0.32458	0.32458	0.32458	0.32458	0.32458	0.32458	0.32458	0.32458	0.32458	0.32458	0.32458	0.32458	0.32458	0.32458	0.32458	0.32458	0.32458	0.32458	0.32458	0.32458	0.32458	0.32458	0.32458	0.32458	0.32458	0.32458	0.32458	0.32458	0.32458	0.32458	0.32458	0.32458	0.32458	0.32458	0.32458	0.32458	0.32458	0.32458	0.32458	0.32458	0.32458	0.32458	0.32458	0.32458
175	0.32458	0.32458	0.32458	0.32458	0.32458	0.32458	0.32458	0.32458	0.32458	0.32458	0.32458	0.32458	0.32458	0.32458	0.32458	0.32458	0.32458	0.32458	0.32458	0.32458	0.32458	0.32458	0.32458	0.32458	0.32458	0.32458	0.32458	0.32458	0.32458	0.32458	0.32458	0.32458	0.32458	0.32458	0.32458	0.32458	0.32458	0.32458	0.32458	0.32458	0.32458	0.32458	0.32458	0.32458	0.32458	0.32458	0.32458	0.32458	0.32458
176	0.32458	0.32458	0.32458	0.32458	0.32458	0.32458	0.32458	0.32458	0.32458	0.32458	0.32458	0.32458	0.32458	0.32458	0.32458	0.32458	0.32458	0.32458	0.32458	0.32458	0.32458	0.32458	0.32458	0.32458	0.32458	0.32458	0.32458	0.32458	0.32458	0.32458	0.32458	0.32458	0.32458	0.32458	0.32458	0.32458	0.32458	0.32458	0.32458	0.32458	0.32458	0.32458	0.32458	0.32458	0.32458	0.32458	0.32458	0.32458	0.32458
177	0.32458	0.32458	0.32458	0.32458	0.32458	0.32458	0.32458	0.32458	0.32458	0.32458	0.32458	0.32458	0.32458	0.32458	0.32458	0.32458	0.32458	0.32458	0.32458	0.32458	0.32458	0.32458	0.32458	0.32458	0.32458	0.32458	0.32458	0.32458	0.32458	0.32458	0.32458	0.32458	0.32458	0.32458	0.32458	0.32458	0.32458	0.32458	0.32458	0.32458	0.32458	0.32458	0.32458	0.32458	0.32458	0.32458	0.32458	0.32458	0.32458
178	0.32458	0.32458	0.32458	0.32458	0.32458	0.32458	0.32458	0.32458	0.32458	0.32458	0.32458	0.32458	0.32458	0.32458	0.32458	0.32458	0.32458	0.32458	0.32458	0.32458	0.32458	0.32458	0.32458	0.32458	0.32458	0.32458	0.32458	0.32458	0.32458	0.32458	0.32458	0.32458	0.32458	0.32458	0.32458	0.32458	0.32458	0.32458	0.32458	0.32458	0.32458	0.32458	0.32458	0.32458	0.32458	0.32458	0.32458	0.32458	0.32458
179	0.32457	0.32457	0.32457	0.32457	0.32457	0.32457	0.32457	0.32457	0.32457	0.32457	0.32457	0.32457	0.32457	0.32457	0.32457	0.32457	0.32457	0.32457	0.32457	0.32457	0.32457	0.32457	0.32457	0.32457	0.32457	0.32457	0.32457	0.32457	0.32457	0.32457	0.32457	0.32457	0.32457	0.32457	0.32457	0.32457	0.32457	0.32457	0.32457	0.32457	0.32457	0.32457	0.32457	0.32457	0.32457	0.32457	0.32457	0.32457	0.32457
180	0.32457	0.32457	0.32457	0.32457	0.32457	0.32457	0.32457	0.32457	0.32457	0.32457	0.32457	0.32457	0.32457	0.32457	0.32457	0.32457	0.32457	0.32457	0.32457	0.32457	0.32457	0.32457	0.32457	0.32457	0.32457	0.32457	0.32457	0.32457	0.32457	0.32457	0.32457	0.32457	0.32457	0.32457	0.32457	0.32457	0.32457	0.32457	0.32457	0.32457	0.32457	0.32457	0.32457	0.32457	0.32457	0.32457	0.32457	0.32457	0.32457
181	0.32457	0.32457	0.32457	0.32457	0.32457	0.32457	0.32457	0.32457	0.32457	0.32457	0.32457	0.32457	0.32457	0.32457	0.32457	0.32457	0.32457	0.32457	0.32457	0.32457	0.32457	0.32457	0.32457	0.32457	0.32457	0.32457	0.32457	0.32457	0.32457	0.32457	0.32457	0.32457	0.32457	0.32457	0.32457	0.32457	0.32457	0.32457	0.32457	0.32457	0.32457	0.32457	0.32457	0.32457	0.32457	0.32457	0.32457	0.32457	0.32457
182	0.32457	0.32457	0.32457	0.32457	0.32457	0.32457	0.32457	0.32457	0.32457	0.32457	0.32457	0.32457	0.32457	0.32457	0.32457	0.32457	0.32457	0.32457	0.32457	0.32457	0.32457	0.32457	0.32457	0.32457	0.32457	0.32457	0.32457	0.32457	0.32457	0.32457	0.32457	0.32457	0.32457	0.32457	0.32457	0.32457	0.32457	0.32457	0.32457	0.32457	0.32457	0.32457	0.32457	0.32457	0.32457	0.32457	0.32457	0.32457	0.32457
183	0.32456	0.32456	0.32456	0.32456	0.32456	0.32456	0.32456	0.32456	0.32456	0.32456	0.32456	0.32456	0.32456	0.32456	0.32456	0.32456	0.32456	0.32456	0.32456	0.32456	0.32456	0.32456	0.32456	0.32456	0.32456	0.32456	0.32456	0.32456	0.32456	0.32456	0.32456	0.32456	0.32456	0.32456	0.32456	0.32456	0.32456	0.32456	0.32456	0.32456	0.32456	0.32456	0.32456	0.32456	0.32456	0.32456	0.32456	0.32456	0.32456
184	0.32456	0.32456	0.32456	0.32456	0.32456	0.32456	0.32456	0.32456	0.32456	0.32456	0.32456	0.32456	0.32456	0.32456	0.32456	0.32456	0.32456	0.32456	0.32456	0.32456	0.32456	0.32456	0.32456	0.32456	0.32456	0.32456	0.32456	0.32456	0.32456	0.32456	0.32456	0.32456	0.32456	0.32456	0.32456	0.32456	0.32456	0.32456	0.32456	0.32456	0.32456	0.32456	0.32456	0.32456	0.32456	0.32456	0.32456	0.32456	0.32456
185	0.32456	0.32456	0.32456	0.32456	0.32456	0.32456	0.32456	0.32456	0.32456	0.32456	0.32456	0.32456	0.32456	0.32456	0.32456	0.32456	0.32456	0.32456	0.32456	0.32456	0.32456	0.32456	0.32456	0.32456	0.32456	0.32456	0.32456	0.32456	0.32456	0.32456	0.32456	0.32456	0.32456	0.32456	0.32456	0.32456	0.32456	0.32456	0.32456	0.32456	0.32456	0.32456	0.32456	0.32456	0.32456	0.32456	0.32456	0.32456	0.32456
186	0.32455	0.32455	0.32455	0.32455	0.32455	0.32455	0.32455	0.32455	0.32455	0.32455	0.32455	0.32455	0.32455	0.32455	0.32455	0.32455	0.32455	0.32455	0.32455	0.32455	0.32455	0.32455	0.32455	0.32455	0.32455	0.32455	0.32455	0.32455	0.32455	0.32455	0.32455	0.32455	0.32455	0.32455	0.32455	0.32455	0.32455	0.32455	0.32455	0.32455	0.32455	0.32455	0.32455	0.32455	0.32455	0.32455	0.32455	0.32455	0.32455
187	0.32455	0.32455	0.32455	0.32455	0.32455	0.32455	0.32455	0.32455	0.32455	0.32455	0.32455	0.32455	0.32455	0.32455	0.32455	0.32455	0.32455	0.32455	0.32455	0.32455	0.32455	0.32455	0.32455	0.32455	0.32455	0.32455	0.32455	0.32455	0.32455	0.32455	0.32455	0.32455	0.32455	0.32455	0.32455	0.32455	0.32455	0.32455	0.32455	0.32455	0.32455	0.32455	0.32455	0.32455	0.32455	0.32455	0.32455	0.32455	0.32455
188	0.32455	0.32455	0.32455	0.32455	0.32455	0.32455	0.32455	0.32455	0.32455	0.32455	0.32455	0.32455	0.32455	0.32455	0.32455	0.32455	0.32455	0.32455	0.32455	0.32455	0.32455	0.32455	0.32455	0.32455	0.32455	0.32455	0.32455	0.32455	0.32455	0.32455	0.32455	0.32455	0.32455	0.32455	0.32455	0.32455	0.32455	0.32455	0.32455	0.32455	0.32455	0.32455	0.32455	0.32455	0.32455	0.32455	0.32455	0.32455	0.32455
189	0.32455	0.32455	0.32455	0.32455	0.32455	0.32455	0.32455	0.32455	0.32455	0.32455	0.32455	0.32455	0.32455	0.32455	0.32455	0.32455	0.32455	0.32455	0.32455	0.32455	0.32455	0.32455	0.32455	0.32455	0.32455	0.32455	0.32455	0.32455	0.32455	0.32455	0.32455	0.32455	0.32455	0.32455	0.32455	0.32455	0.32455	0.32455	0.32455	0.32455	0.32455	0.32455	0.32455	0.32455	0.32455	0.32455	0.32455	0.32455	0.32455
190	0.32454	0.32454	0.32454	0.32454	0.32454	0.32454	0.32454	0.32454	0.32454	0.32454	0.32454	0.32454	0.32454	0.32454	0.32454	0.32454	0.32454	0.32454	0.32454	0.32454	0.32454	0.32454	0.32454	0.32454	0.32454	0.32454	0.32454	0.32454	0.32454	0.32454	0.32454	0.32454	0.32454	0.32454	0.32454	0.32454	0.32454	0.32454	0.32454	0.32454	0.32454	0.32454	0.32454	0.32454	0.32454	0.32454	0.32454	0.32454	0.32454
191	0.32454	0.32454	0.32454	0.32454	0.32454	0.32454	0.32454	0.32454	0.32454	0.32454	0.32454	0.32454	0.32454	0.32454	0.32454	0.32454	0.32454	0.32454	0.32454	0.32454	0.32454	0.32454	0.32454	0.32454	0.32454	0.32454	0.32454	0.32454	0.32454	0.32454	0.32454	0.32454	0.32454	0.32454	0.32454	0.32454	0.32454	0.32454	0.32454	0.32454	0.32454	0.32454	0.32454	0.32454	0.32454	0.32454	0.32454	0.32454	0.32454
192	0.32454	0.32454	0.32454	0.32454	0.32454	0.32454	0.32454	0.32454	0.32454	0.32454	0.32454	0.32454	0.32454	0.32454	0.32454	0.32454	0.32454	0.32454	0.32454	0.32454	0.32454	0.32454	0.32454	0.32454	0.32454	0.32454	0.32454	0.32454	0.32454	0.32454	0.32454	0.32454	0.32454	0.32454	0.32454	0.32454	0.32454	0.32454	0.32454	0.32454	0.32454	0.32454	0.32454	0.32454	0.32454	0.32454	0.32454	0.32454	0.32454
193	0.32454	0.32454	0.32454	0.32454	0.32454	0.32454	0.32454	0.32454	0.32454	0.32454	0.32454	0.32454	0.32454	0.32454	0.32454	0.32454	0.32454	0.32454	0.32454	0.32454	0.32454	0.32454	0.32454	0.32454	0.32454	0.32454	0.32454	0.32454	0.32454	0.32454	0.32454	0.32454	0.32454	0.32454	0.32454	0.32454	0.32454	0.32454	0.32454	0.32454	0.32454	0.32454	0.32454	0.32454	0.32454	0.32454	0.32454	0.32454	0.32454
194	0.32454	0.32454	0.32454	0.32454	0.32454	0.32454	0.32454	0.32454	0.32454	0.32454	0.32454	0.32454	0.32454	0.32454	0.32454	0.32454	0.32454	0.32454	0.32454	0.32454	0.32454	0.32454	0.32454	0.32454	0.32454	0.32454	0.32454	0.32454	0.32454	0.32454	0.32454	0.32454	0.32454	0.32454	0.32454	0.32454	0.32454	0.32454	0.32454	0.32454	0.32454	0.32454	0.32454	0.32454	0.32454	0.32454	0.32454	0.32454	0.32454
195	0.32454	0.32454	0.32454	0.32454	0.32454	0.32454	0.32454	0.32454	0.32454	0.32454	0.32454	0.32454	0.32454	0.32454	0.32454	0.32454	0.32454	0.32454	0.32454	0.32454	0.32454	0.32454	0.32454	0.32454	0.32454	0.32454	0.32454	0.32454	0.32454	0.32454	0.32454	0.32454	0.32454	0.32454	0.32454	0.32454	0.32454	0.32454	0.32454	0.32454	0.32454	0.32454	0.32454	0.32454	0.32454	0.32454	0.32454	0.32454	0.32454
196	0.32454	0.32454	0.32454	0.32454	0.32454	0.32454	0.32454	0.32454	0.32454	0.32454	0.32454	0.32454	0.32454	0.32454	0.32454	0.32454	0.32454	0.32454	0.32454	0.32454	0.32454	0.32454	0.32454	0.32454	0.32454	0.32454	0.32454	0.32454	0.32454	0.32454	0.32454	0.32454	0.32454	0.32454	0.32454	0.32454	0.32454	0.32454	0.32454	0.32454	0.32454	0.32454	0.32454	0.32454	0.32454	0.32454	0.32454	0.32454	0.32454
197	0.32454	0.32454	0.32454	0.32454	0.32454	0.32454	0.32454	0.32454	0.32454	0.32454	0.32454	0.32454	0.32454	0.32454	0.32454	0.32454	0.32454	0.32454	0.32454	0.32454	0.32454	0.32454	0.32454	0.32454	0.32454	0.32454	0.32454	0.32454	0.32454	0.32454	0.32454	0.32454	0.32454	0.32454	0.32454	0.32454	0.32454	0.32454	0.32454	0.32454	0.32454	0.32454	0.32454	0.32454	0.32454	0.32454	0.32454	0.32454	0.32454
198	0.32454	0.32454	0.32454	0.32454	0.32454	0.32454	0.32454	0.32454	0.32454	0.32454	0.32454	0.32454	0.32454	0.32454	0.32454	0.32454	0.32454	0.32454	0.32454	0.32454	0.32454	0.32454	0.32454	0.32454	0.32454	0.32454	0.32454	0.32454	0.32454	0.32454	0.32454	0.32454	0.32454	0.32454	0.32454	0.32454	0.32454	0.32454	0.32454	0.32454	0.32454	0.32454	0.32454	0.32454	0.32454	0.32454	0.32454	0.32454	0.32454
199	0.32454	0.32454	0.32454	0.32454	0.32454	0.32454	0.32454	0.32454	0.32454	0.32454	0.32454	0.32454	0.32454	0.32454	0.32454	0.32454	0.32454	0.32454	0.32454	0.32454	0.32454	0.32454	0.32454	0.32454	0.32454	0.32454	0.32454	0.32454	0.32454	0.32454	0.32454	0.32454	0.32454	0.32454	0.32454	0.32454	0.32454	0.32454	0.32454	0.32454	0.32454	0.32454	0.32454	0.32454	0.32454	0.32454	0.32454	0.32454	0.32454
200	0.32455	0.32455	0.32455	0.32455	0.32455	0.32455	0.32455	0.32455	0.32455	0.32455	0.32455	0.32455	0.32455	0.32455	0.32455	0.32455	0.32455	0.32455	0.32455	0.32455	0.32455	0.32455	0.32455	0.32455	0.32455	0.32455	0.32455	0.32455	0.32455	0.32455	0.32455	0.32455	0.32455	0.32455	0.32455	0.32455	0.32455	0.32455	0.32455	0.32455	0.32455	0.32455	0.32455	0.32455	0.32455	0.32455	0.32455	0.32455	0.32455
201	0.33156	0.3312	0.33117	0.33244	0.33264	0.33186	0.33044	0.33069	0.3335	0.33095	0.33188	0.33103	0.33361	0.33415	0.33251	0.33082	0.3315	0.33093	0.3318	0.3317	0.33137	0.33202	0.33196	0.33092	0.33142	0.33087	0.33128	0.33228	0.33173	0.33286	0.33395	0.33129	0.33231	0.33067	0.33247	0.33205	0.33217	0.33047	0.33255	0.33313	0.33207	0.33302	0.33187	0.33176	0.33305	0.33107	0.33141	0.33048	0.33219
202	0.36493	0.36327	0.36261	0.36825	0.3696	0.36607	0.35851	0.36228	0.37504	0.36052	0.366	0.36202	0.37584	0.37907	0.36986	0.36073	0.36343	0.36092	0.36562	0.36509	0.36462	0.36815	0.36755	0.36157	0.36377	0.3619	0.36455	0.36967	0.36698	0.37291	0.37777	0.36459	0.36773	0.36035	0.36908	0.36685	0.36666	0.3592	0.36969	0.37283	0.36898	0.37269	0.36768	0.36607	0.37318	0.36371	0.36374	0.35995	0.36734
203	0.42919	0.42493	0.42301	0.4365	0.44006	0.43167	0.4125	0.42493	0.45551	0.41679	0.43085	0.42242	0.45819	0.46696	0.44257	0.41799	0.42399	0.41829	0.43031	0.42874	0.42932	0.43856	0.43702	0.42059	0.4256	0.42173	0.4304	0.44329	0.43675	0.45168	0.46383	0.42976	0.4348	0.41738	0.43857	0.43284	0.43214	0.41472	0.44209	0.44928	0.44128	0.44975	0.4382	0.43337	0.45163	0.42807	0.42631	0.41771	0.43469
204	0.53018	0.52152	0.51759	0.54321	0.55021	0.53432	0.49684	0.52498	0.5837	0.5042	0.53173	0.5187	0.59052	0.60844	0.55858	0.50725	0.51791	0.50774	0.5315	0.5276	0.5317	0.5507	0.54793	0.51277	0.52178	0.51514	0.53666	0.5618	0.54954	0.57825	0.60314	0.53318	0.53898	0.50599	0.54681	0.53535	0.53405	0.50197	0.55828	0.57066	0.5574	0.5729	0.55174	0.54141	0.57699	0.53091	0.52493	0.50922	0.54009
205	0.6768	0.66196	0.6554	0.69609	0.70723	0.68227	0.62068	0.67299	0.76525	0.63142	0.67658	0.66178	0.7784	0.80598	0.72656	0.63737	0.65336	0.63813	0.67774	0.66954	0.68126	0.71372	0.70996	0.64696	0.66056	0.65087	0.6947	0.7345	0.71608	0.75966	0.80014	0.68458	0.68772	0.63471	0.70088	0.68196	0.68019	0.63059	0.7278	0.74413	0.72694	0.74976	0.71851	0.70079	0.75594	0.68268	0.66891	0.64463	0.69145
206	0.85504	0.83625	0.8281	0.87542	0.88774	0.86009	0.78322	0.8567	0.95422	0.79536	0.85147	0.84257	0.96908	0.99346	0.91649	0.80392	0.82236	0.80489	0.85508	0.84253	0.86328	0.90259	0.89962	0.8169	0.83226	0.82172	0.88604	0.92839	0.91029	0.95208	0.9917	0.86862	0.86378	0.79955	0.87935	0.85703	0.85534	0.79802	0.92026	0.93303	0.91977	0.94128	0.91153	0.89107	0.94661	0.86851	0.84714	0.81892	0.87092
207	0.99028	0.97696	0.9711	1.0015	1.0086	0.99274	0.93634	0.99712	1.0474	0.94455	0.98542	0.98696	1.0549	1.064	1.031	0.95164	0.96441	0.95239	0.98996	0.97909	0.99876	1.0241	1.0236	0.96273	0.97252	0.96624	1.0185	1.0401	1.032	1.0493	1.0666	1.0039	0.99258	0.94746	1.0024	0.98808	0.98718	0.94967	1.035	1.0378	1.0351	1.044	1.0315	1.02	1.0456	1.0052	0.98754	0.96898	1.0003
208	1.0242	1.0199	1.0179	1.026	1.0276	1.0246	1.0054	1.0309	1.0393	1.0075	1.0212	1.0269	1.0409	1.0417	1.0381	1.01	1.0141	1.0103	1.0243	1.0193	1.0295	1.0373	1.0383	1.0154	1.0177	1.0166	1.039	1.0426	1.0419	1.0423	1.0454	1.0327	1.0224	1.0081	1.0249	1.0209	1.0207	1.0112	1.0405	1.0381	1.0408	1.0411	1.0408	1.0383	1.0407	1.0337	1.0263	1.0212	1.0277
209	0.99298	0.99336	0.99332	0.99101	0.99024	0.99277	0.99372	0.99813	0.99016	0.99277	0.99167	0.99712	0.98941	0.9873	0.99444	0.99242	0.99202	0.99242	0.99339	0.99209	0.99607	0.99597	0.9972	0.99413	0.99282	0.99415	0.9996	0.99653	0.99836	0.99311	0.99098	0.99792	0.99026	0.9922	0.98939	0.9903	0.99031	0.99434	0.99577	0.99208	0.99609	0.99354	0.99731	0.9984	0.99259	0.9985	0.99676	0.99807	0.99369
210	0.93763	0.9398	0.9405	0.93445	0.93286	0.9373	0.94587	0.94161	0.92832	0.94393	0.93725	0.94171	0.92668	0.92377	0.93424	0.94244	0.94046	0.94232	0.93822	0.93859	0.9396	0.93653	0.93774	0.9426	0.94011	0.94217	0.94045	0.93529	0.9378	0.93106	0.92723	0.94082	0.93495	0.94298	0.93283	0.93556	0.93564	0.94429	0.93498	0.9312	0.9353	0.93198	0.93686	0.9392	0.93098	0.94108	0.94179	0.94526	0.9374
211	0.87461	0.8774	0.87834	0.87123	0.86945	0.87435	0.8854	0.87781	0.86349	0.88325	0.87475	0.87826	0.86154	0.85864	0.86959	0.88133	0.87892	0.88118	0.87532	0.87641	0.87605	0.87203	0.87315	0.88089	0.87814	0.88033	0.87567	0.87019	0.87271	0.866	0.86183	0.87698	0.87225	0.88221	0.86974	0.87304	0.87311	0.88294	0.87	0.86653	0.87029	0.867	0.87188	0.87453	0.86613	0.87702	0.87874	0.88278	0.87422
212	0.80951	0.8124	0.81335	0.80636	0.80466	0.80939	0.82072	0.81214	0.7986	0.81867	0.80998	0.81259	0.7966	0.79404	0.80427	0.81663	0.81429	0.81647	0.8103	0.81171	0.81069	0.80661	0.80759	0.81602	0.81338	0.81546	0.80973	0.80467	0.80691	0.80088	0.79696	0.8115	0.80756	0.81767	0.80504	0.80836	0.80839	0.81795	0.80444	0.80144	0.8047	0.80178	0.80618	0.80877	0.80112	0.81136	0.81348	0.81738	0.8093
213	0.74467	0.74743	0.7483	0.74195	0.74044	0.74475	0.75534	0.74683	0.73492	0.75352	0.74538	0.74712	0.73299	0.73096	0.73986	0.7515	0.74945	0.75134	0.74555	0.74708	0.74573	0.74199	0.74282	0.75093	0.74858	0.75043	0.74448	0.74018	0.742	0.73698	0.73359	0.74651	0.74317	0.75261	0.74082	0.7439	0.74388	0.7525	0.73983	0.73738	0.74007	0.73767	0.74137	0.74373	0.73727	0.7462	0.74844	0.7519	0.74481
214	0.68096	0.68347	0.6842	0.67878	0.67754	0.68126	0.69057	0.68272	0.6729	0.68908	0.68187	0.68275	0.6711	0.66971	0.67694	0.68713	0.68551	0.68698	0.68192	0.68348	0.68198	0.6788	0.67946	0.68672	0.68474	0.68632	0.6806	0.67726	0.67857	0.67473	0.67205	0.68277	0.67995	0.68828	0.67785	0.68056	0.68048	0.68781	0.67673	0.67489	0.67695	0.67517	0.67805	0.68007	0.67505	0.6823	0.68451	0.68736	0.68155
215	0.61863	0.62081	0.62136	0.61706	0.61613	0.61916	0.62687	0.62003	0.61261	0.62573	0.61972	0.61974	0.61099	0.61031	0.61565	0.62391	0.62278	0.62378	0.61968	0.62119	0.61966	0.61718	0.61768	0.62372	0.62218	0.62344	0.61825	0.616	0.61676	0.61422	0.61235	0.62049	0.61811	0.62507	0.61634	0.61859	0.61843	0.62426	0.61528	0.61406	0.61547	0.61437	0.61634	0.61797	0.61455	0.61987	0.62194	0.62409	0.61975
216	0.55781	0.55962	0.55997	0.55687	0.55628	0.55859	0.5645	0.55888	0.55401	0.56374	0.55905	0.55825	0.55261	0.55266	0.55599	0.56207	0.56148	0.56195	0.55894	0.56037	0.55888	0.55719	0.55752	0.56215	0.56106	0.56199	0.55752	0.55642	0.5566	0.55542	0.55442	0.55978	0.55779	0.56321	0.55637	0.55811	0.55788	0.56209	0.55548	0.5549	0.55564	0.55525	0.55627	0.55747	0.55574	0.559	0.56089	0.56227	0.55948
217	0.49855	0.49996	0.50011	0.49824	0.49799	0.49955	0.5036	0.49931	0.49701	0.50323	0.49991	0.49833	0.49585	0.49664	0.49794	0.50172	0.50167	0.50162	0.49974	0.50106	0.49967	0.49879	0.49896	0.50208	0.50146	0.50206	0.49841	0.49846	0.49808	0.49822	0.49813	0.50064	0.49899	0.50284	0.49793	0.49915	0.49886	0.50143	0.4973	0.49733	0.49744	0.49774	0.49783	0.49859	0.49853	0.49973	0.50139	0.502	0.50075
218	0.44085	0.44188	0.44183	0.44114	0.44121	0.44206	0.44432	0.44135	0.44151	0.4443	0.44232	0.44005	0.44061	0.4421	0.44145	0.44296	0.44342	0.44289	0.44211	0.4433	0.44205	0.44195	0.44198	0.4436	0.44341	0.4437	0.44093	0.44206	0.44115	0.44256	0.44334	0.44308	0.44172	0.44405	0.44102	0.44173	0.44138	0.44239	0.4407	0.44128	0.44081	0.44176	0.44099	0.44131	0.44283	0.44206	0.44347	0.44335	0.44357
219	0.38478	0.38544	0.38522	0.3856	0.38596	0.38615	0.38675	0.38507	0.38744	0.38706	0.3863	0.38349	0.38681	0.38892	0.38649	0.38589	0.3868	0.38584	0.38607	0.38712	0.38604	0.38668	0.38657	0.38678	0.38697	0.38699	0.3851	0.38721	0.38583	0.38835	0.38995	0.38713	0.386	0.38692	0.38564	0.38587	0.38548	0.38508	0.38566	0.38672	0.38576	0.38727	0.38573	0.38566	0.38859	0.38604	0.38717	0.3864	0.38792
220	0.3307	0.33102	0.33066	0.33194	0.33254	0.33218	0.33136	0.33082	0.33505	0.33192	0.33222	0.32905	0.33467	0.33729	0.33335	0.33093	0.33218	0.33089	0.33198	0.33288	0.33201	0.33326	0.33305	0.33201	0.33252	0.33231	0.33128	0.33417	0.33243	0.33585	0.33814	0.33313	0.33218	0.33189	0.33212	0.33193	0.33151	0.32994	0.3325	0.33391	0.33257	0.33453	0.33238	0.33196	0.33602	0.33201	0.33286	0.33157	0.33414
221	0.27927	0.27931	0.27885	0.28078	0.28155	0.28077	0.27886	0.27928	0.28484	0.2796	0.28073	0.27741	0.2847	0.28766	0.28261	0.27878	0.28027	0.27876	0.2805	0.28123	0.28058	0.28231	0.28203	0.27998	0.28073	0.28034	0.28009	0.2835	0.28155	0.28555	0.28836	0.2817	0.28088	0.27965	0.28106	0.28055	0.28013	0.27771	0.28178	0.28341	0.28183	0.28407	0.28152	0.28084	0.28566	0.28061	0.28119	0.27953	0.28283
222	0.23159	0.23143	0.23092	0.23323	0.23408	0.23303	0.23043	0.23155	0.23781	0.23126	0.23293	0.22971	0.23788	0.24095	0.23531	0.23061	0.23218	0.2306	0.23272	0.23329	0.23286	0.23485	0.23454	0.23184	0.2327	0.23222	0.2326	0.23622	0.23421	0.23844	0.24153	0.23393	0.2332	0.23136	0.23355	0.23284	0.23243	0.22954	0.23454	0.23622	0.23457	0.2369	0.2342	0.23335	0.23849	0.23292	0.23326	0.23142	0.23506
223	0.18934	0.18905	0.18855	0.19092	0.19177	0.19062	0.18778	0.18928	0.19554	0.18859	0.19048	0.1876	0.19577	0.19871	0.19304	0.1881	0.1896	0.1881	0.19031	0.19072	0.19049	0.19252	0.19221	0.18925	0.19013	0.18962	0.19042	0.19392	0.19202	0.19609	0.19919	0.19145	0.19082	0.18871	0.19125	0.19045	0.19009	0.18713	0.19238	0.19397	0.19241	0.19463	0.19202	0.19111	0.19609	0.19058	0.19072	0.18891	0.19249
224	0.1538	0.15347	0.15301	0.1552	0.15596	0.15486	0.15215	0.15375	0.15944	0.15287	0.15471	0.15234	0.15975	0.16236	0.15717	0.15253	0.15383	0.15254	0.15459	0.15486	0.15478	0.15665	0.15637	0.15353	0.15432	0.15385	0.15486	0.15795	0.1563	0.1599	0.16274	0.15558	0.15506	0.153	0.1555	0.15472	0.15443	0.15171	0.15664	0.15802	0.15666	0.1586	0.1563	0.15544	0.15986	0.15489	0.15488	0.15327	0.15647
225	0.1261	0.12578	0.12541	0.12722	0.12784	0.1269	0.12462	0.12605	0.13073	0.12519	0.12677	0.12496	0.13105	0.13316	0.12887	0.12497	0.126	0.12498	0.12669	0.12684	0.12686	0.12841	0.12819	0.12576	0.1264	0.12602	0.12701	0.1295	0.12819	0.13109	0.13346	0.12748	0.12707	0.1253	0.12746	0.1268	0.12657	0.12434	0.12848	0.12956	0.12848	0.13004	0.12818	0.12746	0.13103	0.12696	0.12688	0.12558	0.12816
226	0.10596	0.10569	0.10541	0.10681	0.10728	0.10654	0.10475	0.10592	0.10951	0.10519	0.10643	0.10513	0.1098	0.1114	0.10808	0.10505	0.10582	0.10506	0.10638	0.10646	0.10652	0.10771	0.10755	0.10563	0.10612	0.10582	0.10668	0.10856	0.10758	0.10977	0.11161	0.10697	0.10667	0.10527	0.107	0.10647	0.10631	0.10459	0.10781	0.10862	0.10781	0.10898	0.10758	0.10701	0.10971	0.1066	0.1065	0.10551	0.10747
227	0.09199	0.091771	0.091568	0.092613	0.092959	0.092397	0.091039	0.091947	0.094627	0.09136	0.092314	0.091393	0.09487	0.096037	0.093559	0.091287	0.091842	0.091296	0.092275	0.092317	0.092383	0.093274	0.093148	0.091697	0.092064	0.091837	0.092525	0.093909	0.093194	0.094802	0.096178	0.092695	0.092505	0.091428	0.092757	0.092351	0.09224	0.090957	0.093374	0.093964	0.093372	0.094225	0.093193	0.092765	0.094749	0.092446	0.092337	0.091614	0.093059
228	0.082565	0.082389	0.082241	0.083023	0.083278	0.082848	0.081821	0.082517	0.084508	0.082058	0.082786	0.082132	0.084705	0.08555	0.083714	0.082023	0.082424	0.08203	0.082757	0.082773	0.082833	0.083492	0.083398	0.08231	0.082585	0.082412	0.08295	0.083961	0.083443	0.084619	0.085635	0.083045	0.082937	0.082112	0.083134	0.082824	0.082747	0.081785	0.083586	0.084019	0.083582	0.084203	0.083446	0.083123	0.084576	0.082875	0.082778	0.082246	0.083313
229	0.076435	0.076294	0.076186	0.076773	0.076962	0.076629	0.07585	0.076381	0.077866	0.076026	0.076584	0.076117	0.078025	0.078636	0.077271	0.076016	0.076305	0.076022	0.076561	0.076562	0.076611	0.077098	0.077026	0.076214	0.076421	0.076287	0.076702	0.077442	0.077067	0.077929	0.078677	0.076751	0.076706	0.07607	0.076861	0.076622	0.07657	0.075844	0.077184	0.077504	0.077179	0.077631	0.077073	0.076828	0.077895	0.076637	0.076553	0.07616	0.076952
230	0.072683	0.072568	0.072489	0.072934	0.073075	0.072814	0.072217	0.072623	0.073739	0.072348	0.072781	0.072446	0.073869	0.074309	0.073289	0.072356	0.072564	0.072362	0.072762	0.072754	0.072791	0.073152	0.073095	0.072489	0.072647	0.072542	0.072861	0.073404	0.073131	0.073767	0.074318	0.072879	0.072881	0.072385	0.073005	0.072819	0.072785	0.07223	0.073229	0.073469	0.073223	0.073554	0.07314	0.072953	0.07374	0.072803	0.072732	0.072441	0.073033
231	0.070632	0.070536	0.070479	0.07082	0.070925	0.070717	0.070254	0.070567	0.071414	0.070353	0.070694	0.070452	0.071521	0.071839	0.07107	0.070374	0.070523	0.070378	0.070677	0.070663	0.07069	0.070959	0.070913	0.070459	0.070581	0.070497	0.070742	0.071142	0.070944	0.071416	0.071823	0.07074	0.070778	0.070385	0.070878	0.070732	0.07071	0.07028	0.071028	0.071211	0.071022	0.071265	0.070955	0.07081	0.071395	0.070692	0.070631	0.070413	0.070861
232	0.069789	0.069708	0.069666	0.069933	0.070013	0.069842	0.069476	0.069721	0.070374	0.069553	0.069826	0.06965	0.070464	0.070693	0.070105	0.069581	0.069688	0.069585	0.06981	0.069793	0.069812	0.070013	0.069975	0.069633	0.069729	0.069659	0.06985	0.070148	0.070002	0.070357	0.07066	0.069834	0.069899	0.069581	0.069982	0.069865	0.069851	0.069511	0.070077	0.070219	0.07007	0.070251	0.070015	0.069901	0.070341	0.069806	0.069753	0.069588	0.069933
233	0.069815	0.069744	0.069713	0.069926	0.069988	0.069845	0.069548	0.069743	0.070258	0.069609	0.069834	0.069704	0.070336	0.070501	0.070043	0.069643	0.06972	0.069647	0.069818	0.069799	0.069812	0.069965	0.069932	0.06967	0.069748	0.069689	0.069839	0.070063	0.069956	0.070227	0.070455	0.069814	0.069898	0.069634	0.06997	0.069873	0.069865	0.069589	0.070024	0.070138	0.070017	0.070153	0.06997	0.069878	0.070214	0.069799	0.069753	0.069626	0.069897
234	0.070468	0.070404	0.070381	0.070557	0.070606	0.070482	0.070234	0.070393	0.07081	0.070283	0.070474	0.070377	0.070878	0.070999	0.070633	0.070321	0.070377	0.070325	0.070459	0.070438	0.070446	0.070565	0.070536	0.070331	0.070396	0.070344	0.070465	0.070637	0.070556	0.070769	0.070942	0.070434	0.070533	0.070306	0.070596	0.070513	0.07051	0.070279	0.07062	0.070714	0.070613	0.070718	0.070572	0.070496	0.070759	0.070429	0.070387	0.070287	0.070506
235	0.071577	0.071518	0.0715	0.07165	0.07169	0.071579	0.071365	0.0715	0.071849	0.071406	0.071574	0.071499	0.07191	0.072	0.071697	0.071448	0.071489	0.071451	0.071559	0.071538	0.071542	0.071636	0.07161	0.071445	0.071501	0.071455	0.071554	0.071691	0.071628	0.0718	0.071936	0.071519	0.071629	0.071428	0.071686	0.071613	0.071613	0.071413	0.071689	0.071769	0.071682	0.071765	0.071645	0.071579	0.071792	0.071521	0.071482	0.0714	0.071584
236	0.073006	0.072951	0.072937	0.073069	0.073104	0.073001	0.072809	0.072927	0.073231	0.072845	0.072998	0.072937	0.073288	0.073356	0.073097	0.072889	0.07292	0.072892	0.072983	0.07296	0.072962	0.07304	0.073016	0.072878	0.072928	0.072885	0.07297	0.073083	0.073032	0.073176	0.073286	0.072933	0.07305	0.072867	0.073103	0.073037	0.073039	0.07286	0.073091	0.073163	0.073084	0.073152	0.073049	0.072991	0.073169	0.072939	0.072902	0.072833	0.072992
237	0.074668	0.074614	0.074602	0.074724	0.074755	0.074657	0.074479	0.074587	0.074862	0.074511	0.074655	0.074603	0.074915	0.074969	0.074738	0.074557	0.074582	0.074559	0.07464	0.074617	0.074617	0.074685	0.074661	0.07454	0.074587	0.074546	0.074622	0.074719	0.074676	0.074803	0.074895	0.074583	0.074706	0.074532	0.074757	0.074695	0.074698	0.074531	0.074735	0.0748	0.074727	0.074786	0.074694	0.074641	0.074797	0.074592	0.074557	0.074495	0.074639
238	0.076486	0.076433	0.076423	0.076539	0.076567	0.076473	0.076301	0.076404	0.076662	0.076331	0.076471	0.076424	0.076714	0.076759	0.076545	0.076378	0.0764	0.076381	0.076456	0.076432	0.076431	0.076493	0.07647	0.076359	0.076404	0.076363	0.076434	0.076522	0.076484	0.0766	0.076681	0.076394	0.076521	0.076352	0.076571	0.076511	0.076515	0.076354	0.076542	0.076605	0.076535	0.076588	0.076502	0.076452	0.076595	0.076405	0.07637	0.076312	0.076449
239	0.078418	0.078365	0.078355	0.07847	0.078498	0.078404	0.078232	0.078335	0.078587	0.078262	0.078402	0.078358	0.078638	0.078678	0.078472	0.07831	0.078331	0.078313	0.078386	0.078362	0.078361	0.07842	0.078397	0.078289	0.078334	0.078294	0.078363	0.078446	0.078411	0.078522	0.078597	0.078322	0.078453	0.078284	0.078502	0.078442	0.078447	0.078287	0.07847	0.078532	0.078462	0.078513	0.07843	0.07838	0.078517	0.078333	0.078299	0.078242	0.078376
240	0.080437	0.080382	0.080372	0.080489	0.080517	0.080421	0.080246	0.080352	0.080606	0.080277	0.080419	0.080375	0.080656	0.080696	0.080489	0.080326	0.080347	0.080329	0.080404	0.080379	0.080377	0.080437	0.080414	0.080304	0.08035	0.080309	0.080379	0.080463	0.080427	0.080539	0.080612	0.080337	0.080471	0.080299	0.080521	0.080461	0.080465	0.080302	0.080487	0.08055	0.08048	0.080531	0.080447	0.080396	0.080534	0.080349	0.080314	0.080256	0.080392
241	0.082519	0.082463	0.082452	0.082574	0.082603	0.082504	0.082321	0.082433	0.082696	0.082353	0.082501	0.082455	0.082747	0.082788	0.082575	0.082403	0.082426	0.082406	0.082486	0.08246	0.082459	0.082522	0.082498	0.082383	0.08243	0.082388	0.082461	0.082548	0.082511	0.082627	0.082702	0.082419	0.082555	0.082376	0.082607	0.082544	0.082548	0.082379	0.082573	0.082638	0.082565	0.082618	0.082531	0.082479	0.082622	0.08243	0.082394	0.082333	0.082475
242	0.08465	0.084591	0.08458	0.084709	0.08474	0.084637	0.084442	0.084563	0.084841	0.084476	0.084633	0.084582	0.084893	0.084938	0.084713	0.084527	0.084554	0.08453	0.084617	0.08459	0.08459	0.084658	0.084634	0.084509	0.084559	0.084515	0.084593	0.084687	0.084647	0.08477	0.084849	0.084551	0.084689	0.0845	0.084743	0.084677	0.084681	0.084502	0.084711	0.08478	0.084703	0.08476	0.084667	0.084613	0.084765	0.084562	0.084523	0.084458	0.084609
243	0.086815	0.086753	0.08674	0.086879	0.086912	0.086804	0.086594	0.086727	0.087025	0.086631	0.086798	0.086743	0.087078	0.087128	0.086888	0.086683	0.086714	0.086686	0.086783	0.086754	0.086756	0.086831	0.086805	0.086667	0.086721	0.086674	0.08676	0.086863	0.086818	0.086951	0.087038	0.086717	0.086857	0.086655	0.086914	0.086843	0.086847	0.086656	0.086885	0.086959	0.086877	0.08694	0.086839	0.086782	0.086947	0.086727	0.086686	0.086615	0.086778
244	0.089008	0.088942	0.088926	0.089077	0.089114	0.088998	0.088771	0.088918	0.08924	0.088811	0.088991	0.088929	0.089295	0.089353	0.089093	0.088865	0.088901	0.088868	0.088976	0.088946	0.08895	0.089032	0.089006	0.088852	0.08891	0.08886	0.088955	0.08907	0.089019	0.089165	0.08926	0.088912	0.089053	0.088837	0.089113	0.089038	0.089041	0.088835	0.089089	0.089168	0.089081	0.08915	0.089041	0.088979	0.08916	0.08892	0.088877	0.088799	0.088975
245	0.091223	0.091153	0.091135	0.091299	0.09134	0.091217	0.090969	0.091131	0.091483	0.091013	0.091208	0.091139	0.09154	0.091607	0.091324	0.091068	0.09111	0.091071	0.091193	0.09116	0.091167	0.091259	0.091231	0.091059	0.091121	0.091068	0.091175	0.091302	0.091244	0.091406	0.091512	0.09113	0.091273	0.09104	0.091338	0.091256	0.091258	0.091035	0.091318	0.091404	0.09131	0.091388	0.091268	0.091201	0.091401	0.091137	0.091091	0.091004	0.091197
246	0.09346	0.093385	0.093364	0.093544	0.093589	0.093457	0.093185	0.093366	0.093751	0.093233	0.093445	0.093368	0.093812	0.093889	0.093578	0.09329	0.093339	0.093294	0.09343	0.093396	0.093405	0.093509	0.093479	0.093285	0.093354	0.093296	0.093416	0.093559	0.093493	0.093672	0.09379	0.093371	0.093516	0.093262	0.093584	0.093496	0.093497	0.093254	0.093571	0.093665	0.093563	0.09365	0.093517	0.093444	0.093666	0.093375	0.093325	0.093229	0.093441
247	0.095722	0.09564	0.095617	0.095815	0.095865	0.095721	0.095423	0.095625	0.096049	0.095476	0.095708	0.095621	0.096113	0.096201	0.095859	0.095535	0.095592	0.095539	0.095693	0.095657	0.095669	0.095786	0.095754	0.095535	0.09561	0.095548	0.095682	0.095843	0.095768	0.095967	0.0961	0.095636	0.095783	0.095507	0.095857	0.095761	0.095761	0.095495	0.095851	0.095953	0.095843	0.09594	0.095794	0.095714	0.095961	0.095639	0.095584	0.095477	0.095711
248	0.098007	0.097919	0.097892	0.09811	0.098166	0.098011	0.097682	0.097908	0.098375	0.097741	0.097995	0.097897	0.098443	0.098545	0.098167	0.097803	0.097868	0.097807	0.09798	0.097941	0.097957	0.098088	0.098054	0.097808	0.097889	0.097823	0.097973	0.098154	0.09807	0.098291	0.09844	0.097926	0.098075	0.097774	0.098155	0.098051	0.098049	0.097758	0.098158	0.09827	0.098149	0.098258	0.098096	0.098009	0.098284	0.097927	0.097868	0.097747	0.098006
249	0.10032	0.10023	0.1002	0.10044	0.1005	0.10033	0.099967	0.10022	0.10074	0.10003	0.10031	0.1002	0.10081	0.10093	0.10051	0.1001	0.10017	0.1001	0.1003	0.10025	0.10027	0.10042	0.10039	0.10011	0.1002	0.10013	0.10029	0.1005	0.1004	0.10065	0.10082	0.10025	0.1004	0.10007	0.10048	0.10037	0.10037	0.10005	0.1005	0.10062	0.10049	0.10061	0.10043	0.10033	0.10064	0.10024	0.10018	0.10004	0.10033
250	0.10266	0.10256	0.10253	0.10279	0.10286	0.10268	0.10228	0.10256	0.10313	0.10235	0.10266	0.10253	0.10321	0.10334	0.10288	0.10242	0.1025	0.10242	0.10264	0.1026	0.10262	0.10279	0.10275	0.10244	0.10253	0.10246	0.10265	0.10287	0.10277	0.10304	0.10323	0.1026	0.10275	0.10239	0.10284	0.10272	0.10271	0.10236	0.10287	0.103	0.10286	0.103	0.1028	0.10269	0.10303	0.10259	0.10252	0.10237	0.10269
251	0.10504	0.10493	0.10489	0.10518	0.10526	0.10506	0.10462	0.10493	0.10556	0.1047	0.10503	0.1049	0.10565	0.1058	0.10529	0.10477	0.10487	0.10477	0.10502	0.10497	0.105	0.10519	0.10515	0.10479	0.1049	0.10482	0.10503	0.10529	0.10517	0.10547	0.10568	0.10498	0.10513	0.10474	0.10524	0.1051	0.10509	0.10471	0.10527	0.10542	0.10526	0.10542	0.1052	0.10508	0.10546	0.10497	0.10489	0.10473	0.10508
252	0.10746	0.10734	0.10729	0.10762	0.1077	0.10748	0.10699	0.10735	0.10805	0.10708	0.10745	0.1073	0.10814	0.10831	0.10774	0.10716	0.10727	0.10716	0.10744	0.10739	0.10742	0.10763	0.10759	0.10719	0.10731	0.10722	0.10746	0.10775	0.10761	0.10795	0.10819	0.1074	0.10756	0.10713	0.10767	0.10752	0.10751	0.10709	0.10773	0.10789	0.10772	0.10789	0.10764	0.10751	0.10794	0.10739	0.10731	0.10712	0.10751
253	0.10992	0.10979	0.10974	0.1101	0.11019	0.10995	0.10941	0.10981	0.11059	0.10951	0.10992	0.10975	0.11068	0.11088	0.11025	0.10959	0.10971	0.10959	0.10991	0.10985	0.10989	0.11013	0.11008	0.10963	0.10976	0.10966	0.10993	0.11026	0.1101	0.11048	0.11076	0.10988	0.11004	0.10956	0.11016	0.10999	0.10998	0.10951	0.11023	0.11041	0.11022	0.11041	0.11014	0.11	0.11047	0.10986	0.10977	0.10956	0.10999
254	0.11242	0.11228	0.11222	0.11262	0.11272	0.11246	0.11186	0.11231	0.11317	0.11197	0.11242	0.11223	0.11328	0.1135	0.11279	0.11205	0.1122	0.11206	0.11241	0.11234	0.1124	0.11267	0.11261	0.11211	0.11225	0.11214	0.11245	0.11281	0.11264	0.11306	0.11337	0.11239	0.11255	0.11202	0.11269	0.1125	0.11249	0.11197	0.11277	0.11297	0.11276	0.11298	0.11267	0.11252	0.11305	0.11237	0.11226	0.11203	0.11251
255	0.11496	0.1148	0.11474	0.11518	0.1153	0.11501	0.11435	0.11484	0.1158	0.11447	0.11497	0.11476	0.11592	0.11617	0.11539	0.11455	0.11472	0.11456	0.11495	0.11488	0.11494	0.11524	0.11519	0.11462	0.11478	0.11466	0.11501	0.11541	0.11522	0.11569	0.11603	0.11494	0.11511	0.11452	0.11525	0.11505	0.11503	0.11446	0.11536	0.11558	0.11535	0.11559	0.11525	0.11508	0.11567	0.11492	0.1148	0.11454	0.11507
256	0.11754	0.11737	0.11729	0.11778	0.11791	0.1176	0.11687	0.11742	0.11847	0.117	0.11755	0.11731	0.1186	0.11889	0.11802	0.11709	0.11727	0.1171	0.11754	0.11746	0.11753	0.11786	0.1178	0.11717	0.11734	0.11721	0.1176	0.11805	0.11783	0.11836	0.11875	0.11753	0.1177	0.11706	0.11786	0.11764	0.11762	0.11699	0.11799	0.11823	0.11798	0.11825	0.11788	0.11768	0.11834	0.1175	0.11737	0.11709	0.11767
257	0.12021	0.12001	0.11993	0.12047	0.12062	0.12028	0.11946	0.12008	0.12126	0.11961	0.12021	0.11996	0.1214	0.12172	0.12075	0.11971	0.11991	0.11972	0.12021	0.12012	0.1202	0.12058	0.12051	0.1198	0.11999	0.11985	0.12029	0.12079	0.12055	0.12113	0.12157	0.12021	0.12038	0.11967	0.12056	0.12031	0.12029	0.1196	0.12072	0.12098	0.12071	0.12101	0.12059	0.12038	0.12111	0.12018	0.12003	0.11971	0.12036
258	0.12294	0.12272	0.12263	0.12323	0.12339	0.12301	0.12211	0.1228	0.12411	0.12227	0.12294	0.12266	0.12427	0.12464	0.12355	0.12238	0.12261	0.12239	0.12294	0.12284	0.12294	0.12336	0.12329	0.12249	0.1227	0.12254	0.12304	0.1236	0.12333	0.12398	0.12448	0.12295	0.12313	0.12234	0.12332	0.12305	0.12302	0.12226	0.12352	0.12381	0.1235	0.12384	0.12338	0.12314	0.12396	0.12292	0.12275	0.1224	0.12312
259	0.12572	0.12548	0.12538	0.12605	0.12623	0.12581	0.12481	0.12558	0.12703	0.12499	0.12573	0.12542	0.12721	0.12762	0.12641	0.1251	0.12536	0.12511	0.12572	0.12562	0.12573	0.12621	0.12613	0.12523	0.12546	0.12529	0.12585	0.12648	0.12618	0.1269	0.12745	0.12576	0.12593	0.12506	0.12614	0.12584	0.12581	0.12497	0.12638	0.12669	0.12636	0.12674	0.12622	0.12596	0.12687	0.12571	0.12553	0.12514	0.12593
260	0.12856	0.1283	0.12819	0.12892	0.12912	0.12866	0.12756	0.12842	0.13003	0.12776	0.12857	0.12823	0.13022	0.13068	0.12934	0.12788	0.12816	0.12789	0.12857	0.12845	0.12858	0.12911	0.12903	0.12802	0.12828	0.12809	0.12872	0.12942	0.12908	0.12989	0.13051	0.12862	0.12879	0.12784	0.12903	0.12869	0.12866	0.12773	0.1293	0.12965	0.12929	0.12971	0.12913	0.12885	0.12985	0.12857	0.12837	0.12793	0.1288
261	0.13148	0.1312	0.13107	0.13188	0.13211	0.1316	0.13038	0.13134	0.13312	0.1306	0.1315	0.13113	0.13333	0.13385	0.13236	0.13073	0.13105	0.13074	0.1315	0.13136	0.13152	0.13211	0.13202	0.13089	0.13118	0.13097	0.13168	0.13246	0.13208	0.13297	0.13367	0.13156	0.13174	0.13069	0.132	0.13163	0.13159	0.13057	0.13232	0.1327	0.1323	0.13277	0.13214	0.13181	0.13293	0.13151	0.13128	0.13079	0.13176
262	0.13452	0.13421	0.13407	0.13497	0.13521	0.13466	0.1333	0.13437	0.13636	0.13354	0.13454	0.13413	0.13659	0.13718	0.13551	0.13368	0.13404	0.1337	0.13454	0.13439	0.13458	0.13524	0.13514	0.13388	0.13419	0.13396	0.13476	0.13563	0.13521	0.1362	0.13699	0.13463	0.1348	0.13364	0.13509	0.13468	0.13464	0.13351	0.13547	0.13589	0.13545	0.13597	0.13527	0.13491	0.13616	0.13457	0.13431	0.13377	0.13485
263	0.13765	0.1373	0.13714	0.13814	0.13842	0.1378	0.1363	0.1375	0.13971	0.13657	0.13767	0.13723	0.13997	0.14063	0.13877	0.13672	0.13711	0.13674	0.13768	0.13751	0.13772	0.13846	0.13835	0.13694	0.13729	0.13704	0.13794	0.13891	0.13844	0.13954	0.14043	0.13779	0.13796	0.13667	0.13828	0.13782	0.13777	0.13653	0.13872	0.13918	0.13871	0.13928	0.1385	0.1381	0.13949	0.13772	0.13743	0.13683	0.13802
264	0.14087	0.14049	0.14031	0.14141	0.14172	0.14104	0.13938	0.14072	0.14316	0.13967	0.1409	0.14041	0.14346	0.1442	0.14212	0.13984	0.14028	0.13986	0.14091	0.14072	0.14096	0.14179	0.14167	0.14009	0.14047	0.1402	0.14121	0.14229	0.14177	0.14299	0.14399	0.14104	0.14121	0.13979	0.14156	0.14106	0.141	0.13963	0.14208	0.14258	0.14206	0.1427	0.14183	0.14139	0.14293	0.14096	0.14064	0.13998	0.14129
265	0.14427	0.14384	0.14364	0.14487	0.14522	0.14446	0.14261	0.14411	0.14685	0.14294	0.1443	0.14376	0.14719	0.14803	0.14569	0.14312	0.1436	0.14314	0.14431	0.1441	0.14438	0.14531	0.14518	0.1434	0.14382	0.14352	0.14468	0.14588	0.1453	0.14667	0.1478	0.14448	0.14464	0.14306	0.14503	0.14447	0.14441	0.14289	0.14564	0.1462	0.14562	0.14634	0.14537	0.14488	0.1466	0.14439	0.14403	0.14329	0.14475
266	0.1478	0.14733	0.1471	0.14847	0.14886	0.14802	0.14596	0.14765	0.15071	0.14632	0.14783	0.14725	0.15109	0.15204	0.14941	0.14651	0.14706	0.14654	0.14785	0.14761	0.14794	0.14899	0.14885	0.14684	0.1473	0.14697	0.14829	0.14964	0.14899	0.15052	0.1518	0.14806	0.14821	0.14645	0.14865	0.14802	0.14795	0.14627	0.14937	0.14998	0.14934	0.15014	0.14907	0.14851	0.15044	0.14797	0.14755	0.14673	0.14835
267	0.15147	0.15094	0.15069	0.15221	0.15264	0.15171	0.14942	0.15131	0.15473	0.14981	0.1515	0.15087	0.15517	0.15624	0.15329	0.15003	0.15064	0.15005	0.15153	0.15125	0.15164	0.15282	0.15266	0.1504	0.15091	0.15055	0.15204	0.15356	0.15283	0.15454	0.15599	0.15178	0.15192	0.14996	0.1524	0.1517	0.15162	0.14976	0.15324	0.15392	0.15322	0.15411	0.15291	0.15229	0.15444	0.15168	0.1512	0.15029	0.15208
268	0.15532	0.15472	0.15444	0.15614	0.15662	0.15558	0.15303	0.15516	0.15899	0.15347	0.15534	0.15466	0.15949	0.1607	0.15737	0.15371	0.15438	0.15373	0.15538	0.15507	0.15552	0.15685	0.15668	0.15412	0.15469	0.15429	0.15599	0.15769	0.15688	0.15879	0.16044	0.15569	0.15581	0.15363	0.15635	0.15556	0.15548	0.15341	0.15733	0.15808	0.1573	0.1583	0.15696	0.15626	0.15867	0.15558	0.15504	0.15402	0.15601
269	0.15939	0.15872	0.1584	0.1603	0.16084	0.15969	0.15683	0.15924	0.16355	0.15732	0.15941	0.15867	0.16412	0.1655	0.16173	0.15758	0.15833	0.15761	0.15946	0.15911	0.15964	0.16114	0.16096	0.15805	0.15868	0.15824	0.1602	0.1621	0.16119	0.16333	0.16523	0.15983	0.15992	0.15749	0.16053	0.15965	0.15956	0.15726	0.16169	0.16252	0.16166	0.16278	0.16128	0.16049	0.16319	0.15971	0.15909	0.15796	0.16018
270	0.16366	0.16292	0.16256	0.16469	0.16529	0.164	0.16081	0.16353	0.16838	0.16134	0.16368	0.16289	0.16904	0.1706	0.16633	0.16163	0.16247	0.16167	0.16375	0.16335	0.16397	0.16567	0.16547	0.16217	0.16287	0.16239	0.16463	0.16677	0.16576	0.16816	0.17033	0.1642	0.16425	0.16154	0.16493	0.16395	0.16384	0.16129	0.1663	0.16721	0.16627	0.16753	0.16585	0.16495	0.16799	0.16407	0.16336	0.16209	0.16456
271	0.16827	0.16742	0.16702	0.16941	0.17009	0.16864	0.16506	0.16816	0.17365	0.16565	0.16828	0.16743	0.17442	0.17622	0.17134	0.16597	0.16691	0.16601	0.16837	0.1679	0.16864	0.17058	0.17036	0.16659	0.16737	0.16683	0.16943	0.17186	0.17071	0.17342	0.17594	0.16891	0.16891	0.16586	0.16968	0.16857	0.16845	0.1656	0.17132	0.17232	0.17128	0.1727	0.17081	0.16979	0.17322	0.16877	0.16794	0.16652	0.16929
272	0.17314	0.17219	0.17173	0.17442	0.17519	0.17356	0.16953	0.17306	0.17929	0.17018	0.17314	0.17224	0.1802	0.18225	0.17667	0.17055	0.1716	0.17059	0.17326	0.17271	0.17359	0.17582	0.17558	0.17125	0.17212	0.17152	0.17454	0.1773	0.176	0.17906	0.18198	0.17391	0.17385	0.17041	0.17472	0.17346	0.17333	0.17014	0.17667	0.17778	0.17663	0.17823	0.17609	0.17493	0.17881	0.17377	0.1728	0.17121	0.1743
273	0.17839	0.1773	0.17679	0.17983	0.1807	0.17886	0.1743	0.17836	0.18545	0.17503	0.17837	0.17743	0.18652	0.1889	0.18247	0.17544	0.17662	0.17549	0.17853	0.17788	0.17894	0.18149	0.18123	0.17625	0.17722	0.17655	0.18008	0.18322	0.18175	0.18523	0.18863	0.17932	0.17917	0.17529	0.18015	0.17872	0.17857	0.17501	0.18249	0.18372	0.18245	0.18427	0.18185	0.18052	0.18492	0.17917	0.17804	0.17625	0.17971
274	0.18404	0.18281	0.18223	0.18567	0.18666	0.18458	0.17941	0.18408	0.19219	0.18023	0.18401	0.18302	0.19346	0.19621	0.18878	0.18069	0.18202	0.18075	0.18421	0.18345	0.18471	0.18766	0.18738	0.18161	0.1827	0.18195	0.1861	0.18968	0.18801	0.19197	0.19597	0.18517	0.1849	0.1805	0.18602	0.18439	0.18422	0.18022	0.18884	0.1902	0.18879	0.19086	0.18811	0.18658	0.1916	0.18502	0.18368	0.18166	0.18556
275	0.19026	0.18885	0.18818	0.1921	0.19323	0.19087	0.18498	0.19039	0.19975	0.18588	0.19019	0.18919	0.20129	0.2045	0.19583	0.18641	0.18791	0.18648	0.19046	0.18955	0.19109	0.19453	0.19422	0.18748	0.1887	0.18787	0.19279	0.19692	0.19501	0.19955	0.20432	0.19164	0.1912	0.18619	0.19249	0.19061	0.19043	0.18591	0.19593	0.19745	0.19588	0.19825	0.1951	0.19332	0.19909	0.19149	0.1899	0.18761	0.19201
276	0.19705	0.19541	0.19465	0.19914	0.20043	0.19773	0.19099	0.1973	0.20814	0.19201	0.19693	0.19593	0.21	0.21377	0.2036	0.19261	0.1943	0.19269	0.19728	0.19618	0.19807	0.20209	0.20176	0.19385	0.19522	0.19429	0.20017	0.20494	0.20276	0.20797	0.21367	0.19873	0.19807	0.19234	0.19956	0.19739	0.19719	0.19208	0.20378	0.20546	0.20371	0.20644	0.20283	0.20075	0.20739	0.19859	0.19669	0.19408	0.19907
277	0.20457	0.20268	0.20179	0.20695	0.20845	0.20534	0.1976	0.20501	0.21764	0.19874	0.2044	0.20344	0.21993	0.2244	0.21237	0.19942	0.20135	0.19952	0.20485	0.20352	0.20586	0.21059	0.21023	0.20088	0.20242	0.20138	0.20847	0.21403	0.2115	0.21754	0.22444	0.20665	0.20569	0.19909	0.20741	0.2049	0.20467	0.19888	0.21264	0.2145	0.21257	0.21572	0.21156	0.20911	0.21681	0.20654	0.20423	0.20125	0.20693
278	0.21305	0.21082	0.20979	0.21577	0.21752	0.21392	0.20495	0.21375	0.22862	0.20622	0.21279	0.21194	0.23148	0.23683	0.22243	0.20702	0.20922	0.20714	0.21337	0.21174	0.21467	0.22031	0.21994	0.20873	0.21049	0.20932	0.21798	0.2245	0.22157	0.22861	0.2371	0.21565	0.21425	0.20661	0.21628	0.21333	0.21308	0.20647	0.22284	0.2249	0.22276	0.22644	0.22159	0.21868	0.22767	0.21558	0.21274	0.20931	0.21581
279	0.22263	0.22001	0.21879	0.22577	0.22781	0.22362	0.21316	0.22371	0.24136	0.2146	0.22225	0.22163	0.24498	0.25145	0.23405	0.21553	0.21805	0.21567	0.22303	0.221	0.22471	0.2315	0.23112	0.21757	0.21956	0.21824	0.22894	0.23667	0.23324	0.24151	0.25207	0.22592	0.22393	0.21502	0.22631	0.22283	0.22256	0.215	0.23466	0.23693	0.23456	0.23887	0.2332	0.2297	0.24029	0.22592	0.22239	0.21843	0.2259
280	0.23366	0.23054	0.2291	0.23731	0.23972	0.2348	0.2225	0.23529	0.25649	0.22412	0.23313	0.23289	0.26115	0.26906	0.24776	0.22522	0.22813	0.22539	0.23417	0.23161	0.23638	0.24466	0.24428	0.22767	0.22994	0.22845	0.24187	0.25112	0.24708	0.25688	0.27026	0.23789	0.23505	0.22457	0.23789	0.23374	0.23344	0.22473	0.24866	0.25115	0.24854	0.25366	0.24694	0.24268	0.25528	0.23801	0.23356	0.22894	0.23758
281	0.24653	0.24278	0.24106	0.25079	0.25367	0.24784	0.23325	0.24897	0.27471	0.23508	0.24578	0.24618	0.28081	0.29062	0.26419	0.23638	0.23976	0.23659	0.24719	0.24392	0.25014	0.26037	0.26001	0.23936	0.24197	0.24028	0.25738	0.26858	0.26377	0.27549	0.29274	0.25206	0.24799	0.23554	0.25142	0.24642	0.24608	0.236	0.26551	0.2682	0.26538	0.27149	0.26348	0.25822	0.27335	0.25236	0.24665	0.24123	0.25128
282	0.26189	0.25732	0.25522	0.26691	0.27039	0.26341	0.24588	0.26554	0.29727	0.24796	0.26082	0.2623	0.30542	0.31777	0.28444	0.24952	0.25347	0.24979	0.26277	0.2585	0.26678	0.27965	0.27937	0.25321	0.2562	0.2543	0.27653	0.29029	0.28451	0.29868	0.32141	0.26928	0.26339	0.24842	0.26756	0.26145	0.26108	0.24935	0.2864	0.28924	0.28624	0.29365	0.28398	0.27737	0.29578	0.26986	0.26239	0.25597	0.26775
283	0.2805	0.27486	0.27227	0.28646	0.29071	0.28229	0.26098	0.286	0.32568	0.26334	0.27899	0.28223	0.33677	0.3525	0.30987	0.26522	0.26989	0.26557	0.28174	0.27605	0.28727	0.30376	0.30365	0.26988	0.27332	0.27117	0.30066	0.31782	0.3108	0.3281	0.35865	0.29059	0.28197	0.26375	0.28712	0.27956	0.27916	0.26541	0.31279	0.31566	0.3126	0.32166	0.30987	0.30143	0.32408	0.29162	0.28167	0.27397	0.28788
284	0.30358	0.29651	0.29327	0.31073	0.31598	0.3057	0.27944	0.31193	0.36231	0.28212	0.30145	0.30756	0.37767	0.39792	0.34264	0.28441	0.28998	0.28487	0.30537	0.29764	0.31317	0.33473	0.33493	0.29041	0.29437	0.29197	0.33195	0.35367	0.34506	0.36636	0.40816	0.31769	0.3049	0.28242	0.31134	0.30184	0.30141	0.28523	0.34705	0.34969	0.34681	0.35802	0.34349	0.33254	0.36071	0.31943	0.30587	0.29655	0.31309
285	0.33293	0.32392	0.3198	0.34155	0.34815	0.33549	0.30261	0.34576	0.41062	0.30565	0.3299	0.34073	0.4321	0.45826	0.38601	0.30846	0.31519	0.30909	0.33562	0.32488	0.34685	0.37561	0.3764	0.31638	0.32093	0.31829	0.37378	0.40161	0.39101	0.41729	0.47507	0.35317	0.33388	0.3057	0.34206	0.32992	0.32948	0.31036	0.39274	0.39463	0.39244	0.40641	0.3884	0.37394	0.40926	0.35604	0.33715	0.32572	0.34551
286	0.37117	0.35956	0.35419	0.38166	0.39003	0.37433	0.33254	0.39112	0.47526	0.33596	0.36689	0.38545	0.50513	0.53837	0.44468	0.33943	0.34765	0.3403	0.37539	0.36014	0.39188	0.43093	0.43276	0.35016	0.35534	0.35253	0.43113	0.46697	0.45398	0.48608	0.56496	0.40095	0.3714	0.33553	0.38194	0.36617	0.36575	0.34317	0.45498	0.45519	0.45461	0.47196	0.44972	0.43047	0.47468	0.40559	0.37877	0.3646	0.38833
287	0.42211	0.40699	0.39989	0.43485	0.44554	0.42611	0.37231	0.4532	0.56128	0.37609	0.41612	0.44698	0.60107	0.64082	0.52445	0.38036	0.39053	0.38162	0.42888	0.40692	0.45335	0.50661	0.51022	0.39531	0.40104	0.39827	0.51063	0.55595	0.5405	0.57808	0.67912	0.4666	0.42104	0.37476	0.4347	0.41402	0.41366	0.38722	0.54001	0.53704	0.53956	0.56049	0.53385	0.50853	0.56242	0.4739	0.43553	0.41786	0.44614
288	0.49096	0.47135	0.46188	0.50621	0.51971	0.49614	0.42666	0.53859	0.67052	0.4307	0.48281	0.53195	0.71738	0.75823	0.63	0.43585	0.44854	0.43771	0.50183	0.47025	0.53778	0.60849	0.6147	0.45709	0.46312	0.46082	0.61842	0.67162	0.65488	0.69404	0.80352	0.55702	0.48775	0.4277	0.50533	0.47826	0.47802	0.44785	0.65205	0.64423	0.65154	0.67461	0.64546	0.61428	0.67463	0.56783	0.51411	0.49225	0.52509
289	0.5831	0.55857	0.54619	0.60045	0.61667	0.58982	0.50206	0.65127	0.79135	0.50612	0.57275	0.6442	0.83324	0.86392	0.75541	0.51202	0.52774	0.51474	0.59978	0.55617	0.64933	0.73398	0.74284	0.54211	0.54782	0.54675	0.75001	0.80126	0.78677	0.81781	0.90182	0.67545	0.57685	0.50024	0.59851	0.56431	0.56424	0.53181	0.78178	0.7693	0.78131	0.80168	0.77616	0.74409	0.79884	0.68936	0.62061	0.59477	0.63035
290	0.69841	0.67098	0.65608	0.71576	0.73273	0.70655	0.60472	0.78054	0.89062	0.60839	0.68722	0.77276	0.91157	0.92365	0.87076	0.61432	0.63294	0.61811	0.72064	0.66767	0.77803	0.85689	0.86598	0.65444	0.6588	0.65986	0.87352	0.90582	0.89805	0.91092	0.94204	0.80723	0.68911	0.59819	0.71272	0.67403	0.6741	0.64344	0.89322	0.88073	0.89295	0.90418	0.89038	0.86812	0.89931	0.82041	0.75061	0.72398	0.75662
291	0.81896	0.79536	0.78093	0.83203	0.84516	0.82703	0.7315	0.88935	0.93597	0.73441	0.81055	0.88113	0.93296	0.92966	0.93513	0.73877	0.75797	0.74321	0.84115	0.79302	0.88774	0.93304	0.93873	0.7834	0.78552	0.78869	0.94225	0.94883	0.94818	0.94434	0.9306	0.91023	0.80932	0.71987	0.82871	0.79492	0.79483	0.77259	0.94603	0.93917	0.94599	0.94702	0.94618	0.94001	0.94257	0.91685	0.87275	0.85257	0.87371
292	0.90629	0.89465	0.88562	0.91176	0.91709	0.91191	0.85403	0.93887	0.92911	0.8562	0.90424	0.93162	0.91193	0.90105	0.93936	0.85727	0.87192	0.8609	0.91989	0.89562	0.93921	0.9453	0.94677	0.89143	0.89172	0.89501	0.94568	0.93632	0.93929	0.92812	0.892	0.94865	0.90102	0.84147	0.90961	0.89233	0.89173	0.88241	0.93978	0.93909	0.93989	0.93542	0.94149	0.94653	0.93267	0.94752	0.94076	0.93224	0.93873
293	0.93456	0.93549	0.9337	0.93377	0.9323	0.93693	0.92698	0.93088	0.89278	0.92884	0.93832	0.92538	0.86967	0.85579	0.9068	0.92688	0.9334	0.92836	0.93735	0.93979	0.9328	0.91575	0.91459	0.93963	0.93956	0.94083	0.91079	0.89541	0.89949	0.8867	0.84135	0.93228	0.93541	0.92013	0.93343	0.93408	0.933	0.93353	0.90151	0.90462	0.90166	0.8954	0.90364	0.91329	0.89415	0.92683	0.94405	0.94442	0.942
294	0.91537	0.92316	0.92598	0.91181	0.907	0.91565	0.9355	0.89182	0.84305	0.93735	0.92191	0.8877	0.81788	0.80317	0.85774	0.93426	0.93446	0.93386	0.91146	0.92894	0.89464	0.86751	0.86491	0.93013	0.93056	0.92979	0.85965	0.84241	0.84661	0.83426	0.7858	0.88903	0.92032	0.93591	0.91281	0.92365	0.92242	0.92644	0.84953	0.85488	0.84969	0.84309	0.85167	0.86298	0.84296	0.88183	0.90901	0.91322	0.90796
295	0.87225	0.88262	0.8874	0.86789	0.86183	0.8715	0.90322	0.8393	0.78764	0.90512	0.87966	0.83604	0.76228	0.74785	0.80164	0.90213	0.8994	0.90079	0.86507	0.8887	0.84264	0.81133	0.80789	0.88991	0.89089	0.88892	0.80173	0.78454	0.78841	0.77741	0.72887	0.83445	0.8792	0.9081	0.86966	0.88457	0.88337	0.88753	0.79191	0.79869	0.79206	0.78582	0.79385	0.80552	0.78655	0.82654	0.85765	0.86324	0.8576
296	0.81849	0.82963	0.83519	0.81415	0.80779	0.81726	0.85295	0.78112	0.7304	0.85492	0.82603	0.77835	0.70572	0.69212	0.74307	0.85229	0.84841	0.85054	0.8097	0.83568	0.78478	0.75226	0.74831	0.8365	0.83794	0.83524	0.74151	0.7253	0.72861	0.71937	0.67219	0.77531	0.82644	0.86016	0.81637	0.83263	0.83149	0.83472	0.73254	0.74033	0.73268	0.72712	0.7342	0.74558	0.72855	0.76716	0.79944	0.80531	0.80032
297	0.76035	0.7714	0.77714	0.75642	0.75023	0.75892	0.79494	0.72105	0.67311	0.79702	0.76771	0.71851	0.6495	0.63702	0.68413	0.7948	0.79059	0.79287	0.7508	0.77731	0.72495	0.69267	0.68837	0.77753	0.7794	0.77622	0.68102	0.66625	0.66887	0.66159	0.61647	0.71487	0.76881	0.80349	0.75893	0.77523	0.77414	0.77596	0.67317	0.68178	0.6733	0.66859	0.6745	0.68531	0.67064	0.7067	0.73884	0.74441	0.74063
298	0.70082	0.71136	0.71702	0.69751	0.6917	0.69937	0.73391	0.66081	0.61656	0.73616	0.70788	0.65833	0.59421	0.583	0.62578	0.73434	0.73025	0.73236	0.69093	0.71715	0.66491	0.63358	0.629	0.71667	0.71896	0.7154	0.62117	0.60806	0.60993	0.60471	0.56198	0.65456	0.70959	0.74332	0.70022	0.71592	0.71488	0.71504	0.61457	0.62391	0.61468	0.61091	0.61554	0.62563	0.61353	0.64646	0.67788	0.68285	0.68054
299	0.64135	0.65121	0.65664	0.63877	0.63344	0.63996	0.67221	0.60121	0.56111	0.67465	0.64806	0.59867	0.54009	0.53019	0.56845	0.67322	0.66948	0.67125	0.63132	0.65689	0.60549	0.57548	0.57067	0.65564	0.65837	0.65448	0.56236	0.55103	0.55213	0.549	0.50877	0.59505	0.65033	0.68224	0.64162	0.65646	0.65544	0.6538	0.5571	0.5671	0.55719	0.55438	0.5577	0.56699	0.55754	0.58705	0.61746	0.62169	0.62102
300	0.5826	0.59168	0.59681	0.58079	0.576	0.58132	0.61084	0.54261	0.50683	0.61351	0.58894	0.53995	0.48716	0.47855	0.51229	0.61247	0.60918	0.61052	0.57252	0.59728	0.54706	0.51854	0.51353	0.59521	0.59839	0.59418	0.50477	0.49524	0.49558	0.49451	0.45677	0.53663	0.59175	0.6214	0.58377	0.5976	0.5966	0.59307	0.50085	0.51148	0.50092	0.49908	0.50108	0.50954	0.50274	0.52875	0.55802	0.56141	0.56246
301	0.52485	0.5331	0.53791	0.52382	0.51959	0.52368	0.55028	0.48518	0.4537	0.55318	0.53079	0.48235	0.43537	0.428	0.45732	0.55253	0.54976	0.55061	0.51474	0.53861	0.48976	0.46281	0.45762	0.53573	0.53936	0.53484	0.44847	0.44069	0.4403	0.44118	0.4059	0.47938	0.53412	0.56131	0.5269	0.53967	0.53868	0.53323	0.44585	0.45703	0.4459	0.44498	0.44572	0.45336	0.44911	0.47166	0.49971	0.50223	0.505
302	0.4682	0.4756	0.48007	0.46793	0.46425	0.46715	0.49075	0.42902	0.40171	0.49388	0.47373	0.42603	0.38474	0.37854	0.40361	0.4936	0.49137	0.49173	0.4581	0.48103	0.43368	0.40836	0.40304	0.47734	0.4814	0.4766	0.39359	0.38747	0.38643	0.38907	0.35626	0.42341	0.47755	0.50218	0.47109	0.48279	0.48181	0.47448	0.39218	0.4038	0.39222	0.39213	0.39173	0.39856	0.39665	0.41588	0.44263	0.4443	0.4487
303	0.41279	0.41934	0.42347	0.41322	0.41006	0.41183	0.43246	0.37431	0.35097	0.4358	0.41787	0.3712	0.33541	0.33027	0.35131	0.43588	0.43417	0.43406	0.40271	0.42463	0.37897	0.35534	0.34996	0.42022	0.42466	0.41961	0.34039	0.33578	0.33419	0.33833	0.30809	0.36888	0.42214	0.44423	0.41642	0.42705	0.42609	0.41703	0.34005	0.3519	0.34007	0.34069	0.33931	0.34535	0.34551	0.3616	0.38692	0.38782	0.39367
304	0.35886	0.36458	0.36837	0.35989	0.35723	0.35797	0.37573	0.32152	0.30192	0.37921	0.36344	0.31836	0.2879	0.28372	0.30094	0.37964	0.3784	0.37788	0.34888	0.36966	0.32607	0.30429	0.29896	0.36464	0.36938	0.36417	0.28954	0.28626	0.28429	0.28952	0.26215	0.31628	0.36808	0.38769	0.36309	0.37267	0.37173	0.36122	0.29007	0.30184	0.29008	0.29125	0.28912	0.29436	0.29621	0.30938	0.33302	0.33324	0.34023
305	0.30696	0.31185	0.31528	0.30845	0.30625	0.30611	0.32112	0.27143	0.25535	0.32465	0.31098	0.26835	0.24305	0.23974	0.25337	0.32537	0.32454	0.3237	0.29722	0.31662	0.27573	0.25606	0.25096	0.3112	0.31609	0.31084	0.24203	0.23988	0.23771	0.24355	0.21949	0.26644	0.31585	0.33304	0.31156	0.32009	0.3192	0.30768	0.2432	0.25446	0.2432	0.24472	0.24212	0.24655	0.2496	0.26007	0.28164	0.28134	0.28903
306	0.25788	0.26195	0.265	0.25966	0.25788	0.25706	0.26944	0.22516	0.21241	0.27287	0.26128	0.22231	0.20207	0.19954	0.20982	0.27383	0.27331	0.27227	0.24862	0.26626	0.22902	0.21188	0.20722	0.26072	0.26556	0.26046	0.19919	0.19793	0.19578	0.20166	0.18145	0.22053	0.26618	0.28096	0.26259	0.27003	0.26921	0.25729	0.20072	0.21095	0.20071	0.20236	0.19962	0.20322	0.2069	0.21491	0.23387	0.23322	0.24106
307	0.21312	0.21637	0.21898	0.21499	0.21359	0.21233	0.22217	0.18438	0.17476	0.22533	0.21584	0.18192	0.16652	0.16468	0.17195	0.22644	0.22615	0.22503	0.2047	0.22007	0.18766	0.17342	0.16942	0.21477	0.2193	0.21458	0.16264	0.16204	0.16009	0.16551	0.14946	0.18028	0.22051	0.23281	0.21761	0.22388	0.22316	0.21163	0.16426	0.173	0.16425	0.16584	0.16323	0.16601	0.16979	0.17558	0.19143	0.1906	0.19798
308	0.17406	0.1765	0.17863	0.17581	0.17478	0.17333	0.18075	0.1504	0.14359	0.18347	0.17608	0.14844	0.1375	0.13624	0.14094	0.1846	0.18446	0.1834	0.16685	0.17948	0.15297	0.14191	0.13872	0.17476	0.17871	0.17463	0.13341	0.13325	0.13164	0.13618	0.12434	0.14698	0.18023	0.19001	0.17801	0.18303	0.18245	0.17211	0.1349	0.14183	0.13489	0.13626	0.13403	0.13603	0.13945	0.14334	0.15568	0.15485	0.16122
309	0.1422	0.14391	0.14554	0.1437	0.14298	0.14157	0.1468	0.12403	0.11958	0.14897	0.14358	0.1226	0.11539	0.1146	0.1173	0.15001	0.14995	0.14906	0.13646	0.14612	0.12591	0.11788	0.11549	0.14226	0.14545	0.14217	0.11161	0.11171	0.11046	0.11402	0.10584	0.12137	0.147	0.15429	0.14542	0.14918	0.14874	0.1402	0.11285	0.11799	0.11284	0.11394	0.11216	0.11351	0.11635	0.11873	0.1277	0.12697	0.13203
310	0.11796	0.11906	0.12023	0.11914	0.11867	0.11745	0.12088	0.10485	0.10219	0.12248	0.11881	0.10388	0.099493	0.099054	0.10035	0.12335	0.12334	0.12264	0.11367	0.12058	0.10614	0.10064	0.098939	0.11764	0.12004	0.11759	0.096227	0.096467	0.095543	0.098214	0.092886	0.10288	0.12144	0.12652	0.12039	0.12302	0.12271	0.11617	0.097218	0.10086	0.097209	0.098051	0.096696	0.097544	0.099787	0.10108	0.10722	0.10663	0.1104
311	0.1006	0.10125	0.10204	0.10148	0.10121	0.10021	0.10229	0.091582	0.09017	0.1034	0.10107	0.090957	0.088559	0.088365	0.088718	0.10409	0.10409	0.10359	0.097562	0.10223	0.092429	0.088819	0.087646	0.10011	0.10181	0.10008	0.085805	0.086118	0.085441	0.08742	0.084141	0.090168	0.10298	0.10629	0.10235	0.10406	0.10386	0.099114	0.086584	0.089086	0.086577	0.087216	0.086195	0.086692	0.088438	0.088985	0.093003	0.09255	0.095246
312	0.088719	0.089067	0.089572	0.089366	0.089232	0.088438	0.089573	0.082716	0.082159	0.09032	0.088941	0.082339	0.081298	0.081277	0.081011	0.090837	0.090857	0.090506	0.086638	0.089649	0.083252	0.080987	0.080192	0.088172	0.089344	0.088155	0.078969	0.079321	0.078823	0.080297	0.078453	0.08172	0.090288	0.09231	0.089942	0.090995	0.090872	0.08753	0.079588	0.081277	0.079582	0.080072	0.079297	0.079552	0.080924	0.080975	0.08349	0.083144	0.085042
313	0.080866	0.081007	0.081314	0.081339	0.081296	0.080662	0.081166	0.076993	0.077022	0.081649	0.080925	0.076791	0.076682	0.076781	0.076099	0.082041	0.082066	0.081825	0.079471	0.081323	0.077316	0.075991	0.075464	0.080306	0.081097	0.0803	0.074679	0.075054	0.074684	0.075795	0.074963	0.0763	0.081861	0.082992	0.081711	0.082301	0.082233	0.079913	0.075181	0.076293	0.075176	0.075558	0.074962	0.075047	0.076147	0.075862	0.077328	0.077062	0.078391
314	0.075869	0.075869	0.076039	0.076218	0.076238	0.075721	0.075797	0.073503	0.07394	0.076096	0.075819	0.073425	0.073969	0.074155	0.073184	0.076395	0.076423	0.07626	0.074961	0.076004	0.073675	0.073019	0.072684	0.075312	0.075835	0.075313	0.072214	0.072602	0.072326	0.073172	0.073064	0.073029	0.076464	0.076982	0.076448	0.076718	0.076687	0.075093	0.072629	0.073326	0.072624	0.072929	0.072462	0.072427	0.073328	0.072808	0.073534	0.073325	0.074249
315	0.072902	0.072805	0.072878	0.073162	0.073226	0.072795	0.072573	0.071618	0.072344	0.072741	0.072779	0.071629	0.072636	0.072884	0.071711	0.072974	0.073003	0.072896	0.072344	0.072814	0.071683	0.071505	0.07131	0.072354	0.072685	0.07236	0.071068	0.071465	0.071256	0.071909	0.072322	0.071303	0.073214	0.073303	0.073292	0.073338	0.073332	0.072258	0.071419	0.071815	0.071415	0.071662	0.071291	0.071169	0.071924	0.071239	0.071434	0.071267	0.071897
316	0.071398	0.071231	0.071234	0.071593	0.071688	0.07132	0.070887	0.070893	0.071826	0.070961	0.071223	0.070969	0.072306	0.072598	0.071283	0.071145	0.071176	0.071108	0.071093	0.07115	0.070882	0.071049	0.070955	0.070859	0.071051	0.070867	0.070877	0.071279	0.07112	0.071632	0.072418	0.070696	0.071507	0.07129	0.071651	0.071535	0.071549	0.070851	0.071182	0.071361	0.071177	0.071384	0.071081	0.070897	0.071546	0.070743	0.070557	0.070421	0.070839
317	0.07095	0.070734	0.070688	0.071098	0.071215	0.070895	0.070311	0.071007	0.072087	0.070317	0.070739	0.071128	0.0727	0.073025	0.07161	0.070466	0.070497	0.070459	0.070829	0.070589	0.070942	0.071357	0.071335	0.070421	0.070512	0.070431	0.071374	0.071779	0.071655	0.072068	0.07312	0.070895	0.070914	0.070478	0.071105	0.070874	0.070901	0.070476	0.071645	0.071669	0.071641	0.071818	0.071565	0.071337	0.071909	0.071023	0.070563	0.070451	0.070715
318	0.071265	0.071015	0.070933	0.07138	0.071513	0.071227	0.070537	0.071724	0.07291	0.070494	0.071031	0.071878	0.073617	0.073965	0.072481	0.070617	0.070649	0.070631	0.071277	0.070826	0.071621	0.072213	0.072243	0.070744	0.070764	0.070757	0.072365	0.072774	0.072674	0.073016	0.074258	0.071675	0.071126	0.070534	0.071351	0.071038	0.071074	0.070844	0.072613	0.072527	0.072609	0.072766	0.072547	0.072287	0.072806	0.07186	0.071206	0.071109	0.071265
319	0.072128	0.071853	0.071745	0.07222	0.072364	0.072102	0.071335	0.072872	0.074135	0.071259	0.071877	0.073049	0.074909	0.075276	0.07374	0.071362	0.071395	0.071392	0.072235	0.071633	0.072744	0.073462	0.07353	0.071613	0.071582	0.071627	0.07371	0.074122	0.07404	0.074332	0.07571	0.07287	0.071916	0.071212	0.072165	0.071793	0.071835	0.071745	0.073942	0.073777	0.073938	0.074081	0.073887	0.073603	0.074085	0.073095	0.072303	0.072216	0.072296
320	0.07338	0.073088	0.072961	0.073456	0.073608	0.073363	0.072541	0.074329	0.075649	0.072441	0.073118	0.07452	0.07647	0.07685	0.075277	0.072531	0.072566	0.072572	0.073556	0.072847	0.074182	0.074992	0.075086	0.072871	0.072804	0.072886	0.075307	0.075723	0.075652	0.07591	0.077387	0.074361	0.073117	0.072332	0.073383	0.072969	0.073016	0.073023	0.075528	0.075308	0.075525	0.075659	0.07548	0.07518	0.075638	0.074613	0.073723	0.073643	0.073671
321	0.07492	0.074616	0.074476	0.074985	0.075145	0.074911	0.074049	0.076012	0.077376	0.073933	0.074652	0.076214	0.07823	0.078622	0.077019	0.074012	0.074049	0.074061	0.075145	0.074361	0.075854	0.076729	0.076841	0.074415	0.074323	0.074431	0.077091	0.077511	0.077447	0.077684	0.079231	0.07607	0.074622	0.07378	0.0749	0.074457	0.074507	0.074581	0.077306	0.077048	0.077302	0.077431	0.077263	0.07695	0.077393	0.076342	0.075383	0.075306	0.075299
322	0.076653	0.076339	0.07619	0.076711	0.076875	0.076649	0.075756	0.077847	0.079247	0.075629	0.07638	0.078055	0.080125	0.080527	0.0789	0.075702	0.07574	0.075756	0.076913	0.076076	0.077682	0.078605	0.078731	0.07615	0.076041	0.076167	0.078999	0.079425	0.079365	0.079588	0.081189	0.077925	0.076331	0.075446	0.076618	0.076152	0.076204	0.076324	0.079212	0.078927	0.079208	0.079335	0.079171	0.078848	0.079284	0.07821	0.077202	0.077126	0.077096
323	0.078525	0.078204	0.078047	0.07858	0.078748	0.078526	0.077607	0.079793	0.081225	0.077473	0.078249	0.080004	0.082121	0.082533	0.080882	0.077541	0.077582	0.077599	0.078811	0.077935	0.079623	0.080584	0.080718	0.078022	0.077902	0.07804	0.080999	0.081432	0.081373	0.08159	0.083233	0.079886	0.078186	0.077267	0.07848	0.077998	0.078051	0.078201	0.081212	0.080909	0.081208	0.081335	0.081173	0.080842	0.081276	0.08018	0.079136	0.07906	0.079017
324	0.0805	0.080174	0.080011	0.080554	0.080727	0.080506	0.079565	0.081821	0.083283	0.079427	0.080224	0.082033	0.084193	0.084614	0.08294	0.079491	0.079536	0.079552	0.080806	0.079903	0.081649	0.082639	0.08278	0.079997	0.07987	0.080016	0.083068	0.083509	0.083449	0.083666	0.085344	0.081927	0.080151	0.079206	0.080451	0.079956	0.08001	0.080178	0.083283	0.082969	0.083279	0.083409	0.083245	0.082907	0.083345	0.082228	0.081157	0.081078	0.08103
325	0.082546	0.082215	0.082048	0.082601	0.082777	0.082556	0.081594	0.083906	0.085399	0.081454	0.08227	0.084118	0.08632	0.086752	0.085053	0.081516	0.081565	0.081579	0.082867	0.081943	0.083733	0.084748	0.084893	0.082041	0.08191	0.082061	0.085185	0.085637	0.085574	0.085795	0.087503	0.084023	0.082191	0.081222	0.082496	0.08199	0.082044	0.082221	0.085405	0.085084	0.085401	0.085535	0.085367	0.085022	0.085468	0.084328	0.083237	0.083154	0.083105
326	0.084646	0.084309	0.084138	0.084703	0.084883	0.084659	0.083677	0.086035	0.08756	0.083536	0.084369	0.086246	0.088492	0.088934	0.087208	0.083596	0.08365	0.083661	0.084978	0.084038	0.085862	0.086899	0.087048	0.084137	0.084004	0.084158	0.087341	0.087805	0.087738	0.087966	0.089703	0.086162	0.084287	0.083296	0.084597	0.084081	0.084135	0.084315	0.087568	0.087243	0.087564	0.087702	0.087528	0.087176	0.087635	0.08647	0.085361	0.085273	0.085229
327	0.086787	0.086446	0.086271	0.086849	0.087033	0.086804	0.085801	0.0882	0.089759	0.085661	0.086511	0.088408	0.090701	0.091155	0.089399	0.08572	0.085779	0.085786	0.087129	0.086176	0.088028	0.089086	0.089237	0.086274	0.086141	0.086297	0.089529	0.090007	0.089936	0.090174	0.09194	0.088336	0.086427	0.085415	0.086742	0.086217	0.08627	0.086448	0.089765	0.089438	0.089761	0.089906	0.089724	0.089365	0.089838	0.088646	0.087523	0.087428	0.087392
328	0.088968	0.088621	0.088442	0.089034	0.089223	0.088989	0.087962	0.090399	0.091996	0.087825	0.088693	0.090604	0.092948	0.093415	0.091625	0.087883	0.087947	0.08795	0.089317	0.088353	0.090228	0.091307	0.091459	0.088448	0.088316	0.088472	0.09175	0.092244	0.092165	0.092417	0.094213	0.090544	0.088608	0.087574	0.088927	0.088394	0.088446	0.088617	0.091995	0.091669	0.091991	0.092144	0.091952	0.091585	0.092078	0.090855	0.089719	0.089616	0.089592
329	0.091175	0.090823	0.09064	0.091248	0.091441	0.0912	0.090148	0.092622	0.094262	0.090013	0.0909	0.092823	0.095225	0.095707	0.093878	0.090071	0.090142	0.09014	0.091532	0.090557	0.092454	0.093554	0.093708	0.090647	0.090517	0.090673	0.093995	0.094507	0.094421	0.094689	0.096517	0.092777	0.090816	0.089759	0.091141	0.090598	0.09065	0.09081	0.094252	0.093928	0.094248	0.094411	0.094206	0.093831	0.094346	0.093089	0.09194	0.091828	0.091817
330	0.093407	0.093049	0.092862	0.093488	0.093686	0.093437	0.092357	0.09487	0.096558	0.092225	0.093134	0.095067	0.097533	0.098031	0.096158	0.092284	0.092362	0.092353	0.093772	0.092787	0.094705	0.095828	0.095983	0.09287	0.092743	0.092898	0.096266	0.096798	0.096704	0.096991	0.098854	0.095035	0.093051	0.091969	0.093382	0.092828	0.092879	0.093026	0.096536	0.096215	0.096532	0.096706	0.096487	0.096103	0.096643	0.095348	0.094185	0.094062	0.094069
331	0.095666	0.0953	0.095109	0.095755	0.09596	0.095701	0.094589	0.097144	0.098885	0.09446	0.095394	0.097336	0.099873	0.10039	0.098468	0.09452	0.094606	0.09459	0.096038	0.095042	0.096982	0.09813	0.098286	0.095118	0.094995	0.095148	0.098564	0.099119	0.099015	0.099324	0.10123	0.09732	0.095312	0.094202	0.09565	0.095086	0.095136	0.095266	0.09885	0.098532	0.098845	0.099031	0.098797	0.098402	0.098972	0.097633	0.096455	0.096321	0.096347
332	0.097948	0.097574	0.097377	0.098046	0.098258	0.097988	0.096841	0.099442	0.10124	0.096716	0.097676	0.099629	0.10225	0.10278	0.10081	0.096777	0.096872	0.096848	0.098327	0.097319	0.099284	0.10046	0.10062	0.097386	0.097268	0.097418	0.10089	0.10147	0.10135	0.10169	0.10363	0.09963	0.097597	0.096455	0.097942	0.097365	0.097414	0.097526	0.10119	0.10088	0.10119	0.10139	0.10113	0.10073	0.10133	0.099943	0.098749	0.098601	0.09865
333	0.10026	0.099875	0.099673	0.10037	0.10059	0.1003	0.099117	0.10177	0.10364	0.098996	0.099986	0.10195	0.10466	0.10522	0.10318	0.099059	0.099164	0.099131	0.10065	0.099624	0.10162	0.10282	0.10298	0.099681	0.099568	0.099716	0.10324	0.10385	0.10373	0.10409	0.10608	0.10197	0.099911	0.098734	0.10026	0.099673	0.099721	0.099812	0.10357	0.10326	0.10356	0.10378	0.1035	0.10309	0.10372	0.10228	0.10107	0.10091	0.10098
334	0.10259	0.1022	0.10199	0.10272	0.10294	0.10265	0.10142	0.10413	0.10607	0.1013	0.10232	0.1043	0.10711	0.10769	0.10558	0.10136	0.10148	0.10144	0.10299	0.10196	0.10398	0.10522	0.10537	0.102	0.10189	0.10204	0.10563	0.10627	0.10613	0.10652	0.10857	0.10434	0.10225	0.10104	0.10261	0.10201	0.10205	0.10212	0.10598	0.10567	0.10597	0.1062	0.10591	0.10548	0.10616	0.10465	0.10342	0.10324	0.10334
335	0.10496	0.10456	0.10434	0.1051	0.10534	0.10502	0.10374	0.10652	0.10854	0.10363	0.10469	0.10668	0.1096	0.11021	0.10803	0.1037	0.10383	0.10377	0.10537	0.10432	0.10637	0.10765	0.10781	0.10435	0.10425	0.10439	0.10806	0.10874	0.10858	0.109	0.11111	0.10674	0.10462	0.10337	0.105	0.10437	0.10442	0.10446	0.10843	0.10813	0.10842	0.10867	0.10835	0.1079	0.10863	0.10706	0.1058	0.10561	0.10574
336	0.10737	0.10695	0.10673	0.10752	0.10777	0.10743	0.1061	0.10894	0.11106	0.106	0.1071	0.1091	0.11214	0.11279	0.11051	0.10606	0.10621	0.10614	0.10778	0.10671	0.1088	0.11012	0.11028	0.10673	0.10664	0.10678	0.11052	0.11124	0.11107	0.11153	0.1137	0.10919	0.10703	0.10573	0.10742	0.10678	0.10682	0.10683	0.11092	0.11063	0.11091	0.11118	0.11084	0.11037	0.11115	0.1095	0.10822	0.10801	0.10817
337	0.10981	0.10938	0.10915	0.10998	0.11024	0.10988	0.10849	0.11141	0.11363	0.10839	0.10954	0.11156	0.11474	0.11542	0.11305	0.10846	0.10862	0.10854	0.11024	0.10915	0.11127	0.11264	0.1128	0.10915	0.10907	0.1092	0.11303	0.11379	0.1136	0.11411	0.11635	0.11167	0.10948	0.10812	0.10988	0.10921	0.10926	0.10923	0.11346	0.11317	0.11345	0.11375	0.11337	0.11288	0.11372	0.11199	0.11068	0.11044	0.11065
338	0.11229	0.11185	0.1116	0.11248	0.11275	0.11238	0.11092	0.11392	0.11625	0.11083	0.11202	0.11406	0.11739	0.11811	0.11563	0.1109	0.11107	0.11098	0.11273	0.11162	0.11379	0.11521	0.11537	0.11161	0.11153	0.11166	0.11559	0.1164	0.11619	0.11674	0.11907	0.1142	0.11197	0.11055	0.11238	0.11169	0.11174	0.11167	0.11605	0.11578	0.11604	0.11636	0.11595	0.11545	0.11634	0.11452	0.11318	0.11292	0.11317
339	0.11483	0.11436	0.11411	0.11503	0.11532	0.11492	0.11338	0.11649	0.11894	0.1133	0.11456	0.11662	0.12011	0.12088	0.11828	0.11338	0.11357	0.11346	0.11528	0.11414	0.11636	0.11784	0.118	0.11411	0.11404	0.11417	0.11821	0.11907	0.11884	0.11944	0.12186	0.11679	0.11451	0.11303	0.11494	0.11422	0.11426	0.11416	0.1187	0.11844	0.1187	0.11905	0.1186	0.11807	0.11903	0.11711	0.11574	0.11545	0.11574
340	0.11741	0.11693	0.11667	0.11764	0.11794	0.11752	0.1159	0.11911	0.1217	0.11583	0.11714	0.11923	0.12291	0.12373	0.12099	0.11591	0.11612	0.11599	0.11788	0.11672	0.11899	0.12053	0.12069	0.11667	0.11661	0.11673	0.12089	0.12182	0.12156	0.12222	0.12474	0.11944	0.1171	0.11555	0.11755	0.11681	0.11684	0.1167	0.12143	0.12117	0.12142	0.1218	0.12131	0.12075	0.1218	0.11976	0.11835	0.11803	0.11837
341	0.12006	0.11955	0.11928	0.12031	0.12063	0.12017	0.11846	0.12179	0.12454	0.1184	0.11979	0.1219	0.12579	0.12666	0.12378	0.11848	0.11872	0.11857	0.12054	0.11935	0.12169	0.1233	0.12346	0.11927	0.11923	0.11934	0.12364	0.12464	0.12435	0.12507	0.12771	0.12215	0.11975	0.11812	0.12022	0.11944	0.11948	0.11928	0.12422	0.12398	0.12421	0.12463	0.1241	0.12351	0.12464	0.12247	0.12102	0.12066	0.12106
342	0.12276	0.12223	0.12194	0.12304	0.12338	0.12289	0.12108	0.12454	0.12746	0.12103	0.12249	0.12463	0.12876	0.12969	0.12664	0.12112	0.12138	0.1212	0.12327	0.12204	0.12444	0.12613	0.12629	0.12194	0.12191	0.12201	0.12646	0.12753	0.12721	0.12801	0.13077	0.12493	0.12246	0.12074	0.12296	0.12214	0.12218	0.12192	0.12709	0.12686	0.12708	0.12754	0.12696	0.12633	0.12756	0.12525	0.12375	0.12336	0.12382
343	0.12553	0.12497	0.12467	0.12584	0.1262	0.12567	0.12375	0.12735	0.13047	0.12371	0.12526	0.12743	0.13182	0.13281	0.12958	0.12381	0.12409	0.1239	0.12606	0.12479	0.12727	0.12904	0.12921	0.12466	0.12464	0.12474	0.12936	0.13051	0.13016	0.13103	0.13394	0.12777	0.12524	0.12342	0.12576	0.1249	0.12493	0.12462	0.13005	0.12983	0.13003	0.13054	0.1299	0.12923	0.13056	0.12811	0.12655	0.12612	0.12665
344	0.12837	0.12779	0.12746	0.12872	0.1291	0.12853	0.12649	0.13025	0.13358	0.12646	0.1281	0.13031	0.13498	0.13605	0.13261	0.12656	0.12688	0.12665	0.12892	0.12761	0.13018	0.13205	0.13221	0.12745	0.12745	0.12754	0.13235	0.13359	0.1332	0.13416	0.13722	0.13071	0.12809	0.12617	0.12864	0.12774	0.12777	0.12739	0.13309	0.13289	0.13308	0.13364	0.13293	0.13223	0.13367	0.13104	0.12943	0.12895	0.12956
345	0.13132	0.13069	0.13035	0.13169	0.13211	0.13149	0.12931	0.13325	0.13682	0.1293	0.13104	0.13329	0.13829	0.13945	0.13577	0.1294	0.12975	0.1295	0.13189	0.13053	0.13319	0.13518	0.13534	0.13034	0.13036	0.13044	0.13546	0.1368	0.13637	0.13743	0.14068	0.13375	0.13105	0.129	0.13162	0.13067	0.1307	0.13024	0.13627	0.13609	0.13626	0.13687	0.13609	0.13534	0.13692	0.13409	0.13241	0.13188	0.13258
346	0.13435	0.13369	0.13333	0.13477	0.13522	0.13455	0.13221	0.13636	0.1402	0.13221	0.13407	0.13637	0.14174	0.143	0.13905	0.13232	0.13271	0.13243	0.13495	0.13354	0.13631	0.13842	0.13859	0.13331	0.13335	0.13342	0.13868	0.14014	0.13966	0.14083	0.14429	0.1369	0.13409	0.13191	0.1347	0.1337	0.13372	0.13318	0.13957	0.1394	0.13956	0.14023	0.13937	0.13857	0.1403	0.13725	0.13549	0.1349	0.13569
347	0.13748	0.13678	0.1364	0.13795	0.13843	0.1377	0.13519	0.13956	0.14371	0.13521	0.1372	0.13956	0.14534	0.14671	0.14246	0.13533	0.13576	0.13544	0.13812	0.13665	0.13953	0.14178	0.14195	0.13637	0.13643	0.13649	0.14202	0.14362	0.14307	0.14438	0.14807	0.14016	0.13723	0.1349	0.13788	0.13682	0.13683	0.1362	0.143	0.14285	0.14299	0.14373	0.14278	0.14192	0.14381	0.14052	0.13867	0.13802	0.13892
348	0.14072	0.13997	0.13956	0.14124	0.14175	0.14096	0.13826	0.14289	0.14737	0.1383	0.14044	0.14285	0.14909	0.15058	0.146	0.13843	0.13891	0.13854	0.14139	0.13986	0.14287	0.14527	0.14545	0.13954	0.13962	0.13967	0.14549	0.14723	0.14663	0.14807	0.15203	0.14354	0.14048	0.13798	0.14118	0.14004	0.14005	0.13932	0.14657	0.14644	0.14655	0.14737	0.14632	0.14539	0.14747	0.1439	0.14196	0.14125	0.14226
349	0.14407	0.14327	0.14283	0.14464	0.1452	0.14434	0.14143	0.14633	0.15118	0.14149	0.14378	0.14626	0.153	0.15463	0.14969	0.14163	0.14215	0.14175	0.14478	0.14317	0.14633	0.1489	0.14908	0.1428	0.14291	0.14294	0.14909	0.151	0.15033	0.15192	0.15617	0.14705	0.14385	0.14116	0.14459	0.14338	0.14338	0.14254	0.15028	0.15017	0.15026	0.15116	0.15001	0.14901	0.15129	0.14742	0.14537	0.14458	0.14572
350	0.14757	0.14672	0.14625	0.14821	0.14882	0.14788	0.14473	0.14995	0.15523	0.14482	0.14729	0.14985	0.15718	0.15897	0.15359	0.14497	0.14555	0.14509	0.14833	0.14664	0.14997	0.15274	0.15293	0.14621	0.14635	0.14637	0.15291	0.155	0.15425	0.15602	0.16062	0.15075	0.14737	0.14448	0.14817	0.14687	0.14687	0.1459	0.15422	0.15413	0.1542	0.1552	0.15392	0.15283	0.15535	0.15112	0.14895	0.14808	0.14936
351	0.15124	0.15032	0.14981	0.15195	0.15261	0.15158	0.14817	0.15375	0.15952	0.14828	0.15096	0.15361	0.16161	0.16358	0.15771	0.14844	0.14909	0.14857	0.15206	0.15027	0.15379	0.15679	0.15698	0.14977	0.14994	0.14995	0.15693	0.15923	0.1584	0.16037	0.16537	0.15463	0.15106	0.14793	0.15191	0.15052	0.15051	0.1494	0.15838	0.15831	0.15835	0.15947	0.15805	0.15686	0.15964	0.15502	0.1527	0.15173	0.15318
352	0.15509	0.15409	0.15354	0.15587	0.15659	0.15546	0.15175	0.15774	0.16406	0.15189	0.15479	0.15756	0.16632	0.1685	0.16206	0.15207	0.15278	0.15221	0.15596	0.15406	0.15781	0.16106	0.16126	0.15349	0.1537	0.15369	0.16117	0.16371	0.16278	0.16498	0.17045	0.15871	0.15491	0.15153	0.15584	0.15434	0.15433	0.15306	0.16278	0.16274	0.16275	0.16399	0.16241	0.16111	0.16419	0.15912	0.15664	0.15556	0.15719
353	0.15912	0.15804	0.15745	0.16	0.16079	0.15954	0.15549	0.16194	0.1689	0.15567	0.15882	0.16172	0.17135	0.17378	0.16668	0.15586	0.15665	0.15601	0.16006	0.15804	0.16204	0.16559	0.1658	0.1574	0.15764	0.15761	0.16567	0.16848	0.16745	0.1699	0.17591	0.16303	0.15897	0.15529	0.15998	0.15835	0.15833	0.15689	0.16746	0.16744	0.16743	0.16881	0.16705	0.16561	0.16905	0.16345	0.16079	0.15959	0.16142
354	0.16341	0.16223	0.16158	0.16439	0.16525	0.16388	0.15944	0.16644	0.17413	0.15966	0.16311	0.16616	0.17682	0.17953	0.17166	0.15986	0.16074	0.16002	0.16443	0.16226	0.16657	0.17046	0.17069	0.16153	0.16182	0.16177	0.17051	0.17365	0.17248	0.17523	0.18191	0.16765	0.16328	0.15926	0.16437	0.1626	0.16257	0.16094	0.1725	0.17252	0.17247	0.17402	0.17205	0.17046	0.1743	0.16809	0.16521	0.16387	0.16593
355	0.16796	0.16667	0.16596	0.16905	0.17001	0.16848	0.1636	0.17122	0.17977	0.16386	0.16765	0.17089	0.18273	0.18579	0.17702	0.16409	0.16507	0.16426	0.16907	0.16673	0.17139	0.17569	0.17593	0.1659	0.16624	0.16616	0.17571	0.17921	0.1779	0.18099	0.18845	0.17258	0.16785	0.16344	0.16905	0.16711	0.16707	0.16521	0.17794	0.17798	0.17791	0.17964	0.17743	0.17567	0.17996	0.17305	0.16992	0.16841	0.17074
356	0.17281	0.1714	0.17061	0.17404	0.17509	0.1734	0.16801	0.17636	0.1859	0.16832	0.17249	0.17596	0.1892	0.19265	0.18282	0.16857	0.16967	0.16875	0.17403	0.1715	0.17657	0.18134	0.1816	0.17055	0.17095	0.17084	0.18133	0.18527	0.18379	0.18727	0.19568	0.17789	0.17272	0.16787	0.17404	0.17191	0.17187	0.16976	0.18384	0.18391	0.1838	0.18576	0.18327	0.1813	0.18613	0.1784	0.17496	0.17327	0.1759
357	0.17804	0.17648	0.17561	0.17941	0.18059	0.1787	0.17273	0.18193	0.19266	0.17308	0.1777	0.18146	0.19636	0.2003	0.18918	0.17336	0.17459	0.17356	0.17939	0.17662	0.18219	0.18752	0.18782	0.17554	0.176	0.17587	0.18749	0.19195	0.19027	0.19422	0.20379	0.18367	0.17797	0.17261	0.17943	0.17708	0.17702	0.17463	0.19033	0.19042	0.19029	0.19251	0.18969	0.18746	0.19293	0.18422	0.18041	0.17851	0.18149
358	0.18367	0.18194	0.18097	0.18522	0.18654	0.18442	0.17777	0.18799	0.20011	0.17819	0.18332	0.18743	0.2043	0.20882	0.19618	0.17849	0.17987	0.17871	0.18518	0.18213	0.18829	0.1943	0.19464	0.1809	0.18143	0.18128	0.19426	0.19932	0.19741	0.20191	0.2129	0.18997	0.18363	0.17767	0.18526	0.18264	0.18257	0.17986	0.19748	0.19758	0.19743	0.19996	0.19675	0.19423	0.20044	0.19058	0.18633	0.18418	0.18755
359	0.18982	0.18789	0.18681	0.19158	0.19306	0.19068	0.18322	0.19466	0.20847	0.18371	0.18946	0.19402	0.21329	0.21853	0.204	0.18404	0.1856	0.18429	0.19153	0.18813	0.19503	0.20186	0.20225	0.18674	0.18735	0.18716	0.20182	0.20762	0.20543	0.21058	0.22338	0.19694	0.18981	0.18314	0.19163	0.1887	0.18862	0.18553	0.20551	0.2056	0.20545	0.20834	0.20468	0.20179	0.20888	0.19763	0.19283	0.1904	0.19423
360	0.19657	0.1944	0.19318	0.19856	0.20024	0.19755	0.18914	0.20207	0.21792	0.18971	0.19619	0.20132	0.22353	0.22965	0.2128	0.19008	0.19185	0.19036	0.19851	0.1947	0.2025	0.21034	0.2108	0.19311	0.19381	0.1936	0.21034	0.21702	0.2145	0.22043	0.23553	0.20471	0.19658	0.18908	0.19863	0.19533	0.19524	0.19173	0.21457	0.21464	0.2145	0.21783	0.21362	0.21028	0.21845	0.20549	0.20002	0.19725	0.20161
361	0.20407	0.2016	0.20022	0.20634	0.20826	0.20519	0.19565	0.21041	0.22878	0.19631	0.20366	0.20956	0.23542	0.24266	0.22288	0.19672	0.19874	0.19704	0.20631	0.20197	0.21093	0.22002	0.22058	0.20017	0.20096	0.20072	0.22009	0.22788	0.22497	0.23184	0.24997	0.2135	0.20409	0.19559	0.20643	0.20267	0.20256	0.19858	0.22499	0.22501	0.22492	0.22879	0.22391	0.22	0.22948	0.21442	0.20809	0.20492	0.2099
362	0.21245	0.20963	0.20804	0.21505	0.21725	0.21375	0.20285	0.21987	0.24135	0.20361	0.21201	0.21891	0.24933	0.25799	0.23452	0.20407	0.20637	0.20443	0.21508	0.21008	0.22048	0.23116	0.23185	0.20803	0.20893	0.20866	0.23137	0.24053	0.23713	0.24516	0.26724	0.22353	0.21248	0.20279	0.21516	0.21085	0.21073	0.2062	0.23709	0.23698	0.237	0.24153	0.23584	0.23122	0.24231	0.22463	0.21721	0.21356	0.21927
363	0.22194	0.2187	0.21686	0.22493	0.22749	0.22346	0.21091	0.23078	0.25619	0.21178	0.22146	0.22972	0.26595	0.27643	0.24822	0.2123	0.21495	0.21271	0.22508	0.21924	0.23151	0.24422	0.2451	0.2169	0.21791	0.21763	0.24468	0.25556	0.25157	0.26101	0.28841	0.23518	0.22198	0.21082	0.22507	0.22008	0.21994	0.21478	0.2514	0.25109	0.2513	0.25664	0.24996	0.24443	0.25751	0.23653	0.22769	0.22345	0.23002
364	0.23285	0.22907	0.22692	0.23632	0.23931	0.23465	0.22005	0.2436	0.27404	0.22106	0.23233	0.24245	0.28622	0.29907	0.26467	0.22163	0.2247	0.22213	0.23666	0.22972	0.24448	0.25983	0.26099	0.22706	0.22819	0.22791	0.26072	0.27382	0.26909	0.28029	0.315	0.24896	0.23287	0.2199	0.23648	0.23064	0.23049	0.22461	0.26871	0.26805	0.26858	0.27496	0.26703	0.26031	0.2759	0.25066	0.23994	0.23499	0.24258
365	0.24559	0.24114	0.23859	0.24963	0.25317	0.24773	0.23058	0.25895	0.29594	0.23174	0.24502	0.25776	0.31146	0.32744	0.28485	0.23238	0.23597	0.23298	0.25032	0.24191	0.26002	0.2789	0.28047	0.23889	0.24014	0.23989	0.28049	0.29649	0.29084	0.30424	0.34918	0.26562	0.24555	0.23032	0.24982	0.2429	0.24273	0.23604	0.2901	0.28884	0.28995	0.29763	0.28812	0.27982	0.29863	0.26782	0.25454	0.2487	0.25752
366	0.26073	0.25542	0.25236	0.26548	0.26972	0.26333	0.24293	0.27775	0.3234	0.24427	0.26012	0.27661	0.34362	0.36378	0.31022	0.24498	0.24921	0.24571	0.26676	0.25636	0.27908	0.30278	0.30497	0.25292	0.25428	0.25411	0.30555	0.32538	0.31857	0.33473	0.39413	0.28626	0.26059	0.24247	0.26571	0.25738	0.2572	0.24961	0.31721	0.31496	0.31702	0.32639	0.31489	0.30444	0.3274	0.28918	0.27235	0.26539	0.27567
367	0.27908	0.27267	0.26892	0.28471	0.28987	0.2823	0.2577	0.30136	0.35861	0.25924	0.27846	0.30046	0.38547	0.41116	0.34292	0.26001	0.26507	0.26093	0.28699	0.27381	0.30305	0.33346	0.33659	0.26993	0.27136	0.27136	0.33816	0.36314	0.35486	0.37445	0.45418	0.3125	0.27877	0.2569	0.285	0.27481	0.27462	0.26606	0.35247	0.34858	0.35224	0.36377	0.34975	0.33636	0.36467	0.31649	0.29461	0.28623	0.29825
368	0.30181	0.29396	0.28928	0.30856	0.31492	0.3059	0.27577	0.33181	0.40468	0.27756	0.30124	0.33146	0.44085	0.47363	0.38612	0.27836	0.28448	0.27955	0.31251	0.29538	0.33405	0.37391	0.37851	0.29105	0.29247	0.2928	0.38181	0.41364	0.40357	0.42727	0.53444	0.34683	0.30124	0.2744	0.30894	0.29624	0.29606	0.28651	0.39947	0.3929	0.39918	0.41347	0.3963	0.37887	0.41403	0.35239	0.32323	0.31301	0.32709
369	0.3307	0.32094	0.31498	0.33884	0.34681	0.33601	0.29848	0.3722	0.46595	0.30055	0.33032	0.37298	0.51456	0.55557	0.44445	0.30133	0.30886	0.30292	0.34562	0.32276	0.3753	0.42862	0.4355	0.31804	0.31927	0.32021	0.44169	0.48237	0.47024	0.49838	0.63796	0.39309	0.32969	0.29617	0.33937	0.32324	0.32309	0.3127	0.46342	0.45254	0.46306	0.48066	0.45981	0.43693	0.48044	0.40102	0.3612	0.34858	0.36501
370	0.36835	0.35604	0.34828	0.37824	0.38838	0.37546	0.32791	0.42714	0.54732	0.3303	0.36847	0.42991	0.6102	0.65815	0.52378	0.33093	0.34037	0.33311	0.38979	0.35851	0.43164	0.50363	0.51389	0.35359	0.35431	0.35634	0.52456	0.57532	0.5613	0.59285	0.75678	0.45694	0.36669	0.324	0.37905	0.35817	0.35807	0.3473	0.55055	0.5333	0.55011	0.57109	0.54667	0.51713	0.56935	0.46827	0.41311	0.39735	0.41631
371	0.41862	0.40296	0.39263	0.43065	0.44365	0.42836	0.36723	0.50273	0.65117	0.36999	0.41983	0.50843	0.72363	0.77135	0.62845	0.37019	0.38227	0.3733	0.45	0.4065	0.50944	0.60467	0.61925	0.40183	0.40145	0.40538	0.63553	0.69349	0.67897	0.7096	0.86287	0.54537	0.416	0.36065	0.43194	0.40449	0.40452	0.39438	0.66403	0.63922	0.66353	0.68616	0.66036	0.62493	0.68205	0.56106	0.48553	0.46584	0.48706
372	0.48674	0.4669	0.45303	0.50119	0.51774	0.50026	0.42131	0.60443	0.76869	0.42449	0.4901	0.61296	0.83321	0.86772	0.75224	0.42375	0.43947	0.42829	0.53236	0.47234	0.61408	0.72915	0.74705	0.46875	0.46633	0.47342	0.7668	0.81974	0.80808	0.82947	0.92191	0.66225	0.48286	0.41032	0.50334	0.46716	0.46739	0.45986	0.79208	0.76323	0.79164	0.81089	0.78948	0.75457	0.80444	0.68162	0.58572	0.56174	0.58402
373	0.57832	0.55409	0.53575	0.59489	0.61499	0.59655	0.49695	0.72856	0.87137	0.5006	0.58527	0.73674	0.90506	0.91801	0.86615	0.49807	0.51859	0.50468	0.64065	0.56267	0.74048	0.85168	0.86783	0.5614	0.55584	0.5675	0.88352	0.91394	0.90839	0.91452	0.92673	0.79476	0.57305	0.47906	0.5983	0.55217	0.55263	0.55049	0.89784	0.87509	0.8976	0.90756	0.89697	0.87422	0.90089	0.81295	0.71383	0.68725	0.7079
374	0.69382	0.66732	0.64504	0.71064	0.73194	0.71569	0.60084	0.84854	0.926	0.60501	0.70511	0.85045	0.92315	0.91874	0.93068	0.59969	0.62541	0.60877	0.76582	0.68022	0.85922	0.92909	0.93765	0.68209	0.67326	0.68944	0.94268	0.94614	0.94621	0.94061	0.89725	0.90255	0.6878	0.57377	0.71524	0.66269	0.6632	0.66832	0.94442	0.93575	0.94439	0.94467	0.94497	0.93989	0.94035	0.9121	0.84562	0.82235	0.83759
375	0.8161	0.7938	0.77207	0.82919	0.84585	0.83606	0.7302	0.92242	0.9272	0.73483	0.82941	0.91563	0.90141	0.88843	0.93571	0.72675	0.75474	0.73719	0.87526	0.80991	0.92811	0.94287	0.94361	0.81349	0.80436	0.82054	0.9395	0.92744	0.93006	0.92044	0.85187	0.94721	0.81143	0.69587	0.83368	0.78786	0.78786	0.79714	0.93429	0.93741	0.93439	0.9297	0.93539	0.94195	0.92816	0.94622	0.93287	0.91975	0.92782
376	0.90665	0.89605	0.88264	0.91257	0.91927	0.91748	0.85598	0.93427	0.89539	0.86064	0.91671	0.92253	0.85978	0.84328	0.9037	0.8526	0.8747	0.86078	0.93117	0.91043	0.93512	0.91396	0.91035	0.91199	0.90775	0.91635	0.90182	0.88431	0.88755	0.87777	0.79932	0.9341	0.90578	0.82578	0.9151	0.89257	0.89151	0.89652	0.89452	0.90368	0.89467	0.8885	0.89568	0.90671	0.88889	0.92709	0.95095	0.94805	0.95124
377	0.93732	0.93883	0.93692	0.93701	0.93474	0.93792	0.93113	0.90496	0.84836	0.93505	0.94137	0.8922	0.80905	0.79138	0.8554	0.93086	0.94028	0.93358	0.92938	0.94721	0.90342	0.8664	0.86064	0.94484	0.94706	0.94588	0.85001	0.83083	0.83404	0.82525	0.7441	0.89225	0.94043	0.91864	0.93726	0.94018	0.9383	0.93407	0.84237	0.85465	0.84252	0.83613	0.8434	0.85601	0.83782	0.88292	0.92181	0.92411	0.92574
378	0.91857	0.92642	0.93186	0.91547	0.90884	0.91343	0.93945	0.85726	0.79451	0.94232	0.91831	0.84472	0.75453	0.73697	0.79994	0.94249	0.94144	0.9406	0.89397	0.9295	0.85479	0.81081	0.80385	0.92446	0.93043	0.92357	0.79208	0.77305	0.77587	0.76865	0.6885	0.83859	0.92386	0.94491	0.9145	0.93136	0.92935	0.91834	0.78491	0.79896	0.78506	0.77906	0.78571	0.79866	0.78167	0.82831	0.87286	0.87712	0.87875
379	0.87538	0.88536	0.8937	0.87151	0.86333	0.86786	0.90596	0.80149	0.73815	0.90814	0.87293	0.78944	0.69901	0.68223	0.74182	0.9107	0.905	0.90679	0.84377	0.88556	0.79864	0.75211	0.7445	0.87922	0.88673	0.87755	0.73208	0.71415	0.71639	0.71102	0.63357	0.77984	0.88155	0.92055	0.8701	0.89204	0.89021	0.8758	0.72581	0.74091	0.72595	0.72066	0.72634	0.73895	0.72399	0.76926	0.81561	0.82057	0.82275
380	0.8216	0.83214	0.84157	0.81771	0.8091	0.81308	0.85502	0.74246	0.68143	0.85688	0.81792	0.73095	0.64381	0.62815	0.68328	0.86059	0.85311	0.85591	0.78698	0.83077	0.73956	0.6928	0.6848	0.82364	0.83189	0.82164	0.67194	0.65555	0.65711	0.65371	0.57976	0.71954	0.82814	0.87341	0.81616	0.83972	0.83807	0.82172	0.66679	0.68263	0.66691	0.66249	0.667	0.67897	0.66641	0.70897	0.7551	0.76003	0.76312
381	0.76328	0.77361	0.78332	0.75976	0.7513	0.75446	0.79657	0.68265	0.62531	0.7983	0.75889	0.67159	0.58954	0.57514	0.62529	0.80266	0.79455	0.79768	0.72771	0.77136	0.67984	0.63397	0.6257	0.76365	0.7723	0.76156	0.61249	0.59787	0.5987	0.59733	0.5272	0.65928	0.76995	0.81676	0.75822	0.78175	0.78026	0.76255	0.60857	0.625	0.60868	0.6052	0.60844	0.61963	0.60964	0.64883	0.69388	0.6984	0.70265
382	0.70355	0.71331	0.72287	0.70061	0.69259	0.69481	0.73519	0.62318	0.57022	0.7369	0.69873	0.61246	0.5364	0.52333	0.5683	0.74165	0.73356	0.73662	0.66801	0.71058	0.62052	0.5761	0.56764	0.70237	0.71127	0.70031	0.5541	0.54135	0.54143	0.54211	0.47584	0.59974	0.71028	0.75618	0.69915	0.72187	0.7205	0.70164	0.55148	0.56843	0.55156	0.54907	0.55099	0.56133	0.55399	0.58949	0.63307	0.63698	0.64252
383	0.64391	0.65293	0.66216	0.64165	0.63419	0.63539	0.67319	0.56457	0.51629	0.67497	0.63878	0.55411	0.48443	0.47268	0.51246	0.67999	0.67224	0.67501	0.60879	0.64994	0.56208	0.51939	0.51076	0.64121	0.65032	0.63924	0.49693	0.48607	0.48541	0.48808	0.42561	0.54126	0.65067	0.69452	0.64029	0.66187	0.66058	0.64059	0.49561	0.51304	0.49568	0.49415	0.49477	0.50424	0.49952	0.53123	0.57316	0.57635	0.58328
384	0.58493	0.59313	0.60194	0.58341	0.57656	0.57671	0.61147	0.50702	0.46349	0.61339	0.57955	0.49675	0.43357	0.42308	0.4578	0.61861	0.61137	0.61374	0.55041	0.58998	0.50469	0.46388	0.45512	0.58071	0.59004	0.57888	0.44105	0.43203	0.43067	0.43522	0.37648	0.48394	0.5917	0.63295	0.58215	0.60242	0.60121	0.58005	0.44099	0.45882	0.44104	0.44043	0.43979	0.4484	0.44619	0.47416	0.51434	0.51674	0.5251
385	0.52694	0.53427	0.54262	0.52616	0.51995	0.51903	0.55057	0.45066	0.41179	0.55264	0.52131	0.44056	0.38381	0.3745	0.40437	0.55805	0.5514	0.5533	0.49307	0.53101	0.44846	0.4096	0.40077	0.5212	0.53075	0.51952	0.38658	0.37929	0.37732	0.38354	0.32859	0.42786	0.5337	0.57211	0.525	0.54392	0.54276	0.52041	0.38767	0.40578	0.38771	0.38793	0.38616	0.39392	0.39401	0.41836	0.45672	0.45834	0.46807
386	0.47008	0.47654	0.48442	0.47003	0.46445	0.46249	0.49077	0.39565	0.36127	0.49299	0.4642	0.38574	0.33529	0.32707	0.35232	0.49859	0.49253	0.49397	0.43689	0.47318	0.39352	0.35675	0.34793	0.46286	0.47259	0.46132	0.33384	0.32813	0.32567	0.33323	0.28242	0.37319	0.4768	0.51231	0.46894	0.48651	0.48541	0.4619	0.33591	0.35406	0.33593	0.33685	0.33414	0.34105	0.34314	0.36405	0.40043	0.40132	0.41226
387	0.41447	0.42006	0.42746	0.41508	0.4101	0.40717	0.43224	0.34227	0.31223	0.43459	0.40832	0.33266	0.28844	0.28126	0.3021	0.44035	0.43489	0.43587	0.38203	0.41659	0.34018	0.30576	0.29713	0.40583	0.4157	0.40444	0.28346	0.27917	0.27639	0.28483	0.23882	0.32034	0.42107	0.4537	0.41403	0.43028	0.42923	0.40471	0.28628	0.30406	0.28629	0.28774	0.28433	0.29039	0.29405	0.31169	0.34578	0.34603	0.35789
388	0.36031	0.36505	0.37197	0.36149	0.35709	0.35332	0.37526	0.29116	0.26537	0.37769	0.35393	0.28205	0.24413	0.23798	0.25461	0.38357	0.37867	0.37925	0.32886	0.36146	0.28909	0.25753	0.24934	0.35045	0.36032	0.3492	0.23655	0.23349	0.23062	0.23934	0.19912	0.27013	0.3667	0.39647	0.36046	0.37538	0.3744	0.34923	0.23981	0.25664	0.23981	0.24158	0.23781	0.24298	0.24766	0.26218	0.29343	0.29317	0.30548
389	0.30812	0.31204	0.31842	0.30973	0.30589	0.30149	0.32036	0.24338	0.22186	0.3228	0.3016	0.23504	0.20361	0.1985	0.21115	0.3287	0.32434	0.32458	0.27815	0.30835	0.24134	0.21336	0.20594	0.29738	0.30703	0.29626	0.19458	0.19253	0.18981	0.19815	0.16468	0.22386	0.31414	0.34099	0.3087	0.32224	0.32134	0.29613	0.19792	0.21309	0.19791	0.19977	0.196	0.20024	0.20533	0.21683	0.24449	0.24388	0.25602
390	0.25874	0.26187	0.26762	0.26061	0.25732	0.25258	0.26842	0.20031	0.18313	0.27076	0.25227	0.19308	0.16828	0.16423	0.17323	0.27651	0.27268	0.27267	0.23104	0.25815	0.19838	0.17479	0.16847	0.24764	0.25674	0.24667	0.15902	0.15778	0.1554	0.16274	0.13664	0.18307	0.26421	0.28797	0.25958	0.2716	0.2708	0.24649	0.1621	0.17494	0.16209	0.16383	0.1604	0.16369	0.16857	0.17721	0.20044	0.19965	0.21087
391	0.21362	0.21599	0.22099	0.21555	0.21283	0.20813	0.22092	0.16361	0.15065	0.22303	0.20751	0.15775	0.13935	0.13632	0.1422	0.22839	0.22511	0.22495	0.18921	0.21241	0.16188	0.14321	0.13817	0.20289	0.21103	0.20208	0.13084	0.1302	0.12828	0.13425	0.11522	0.1493	0.21834	0.23869	0.21455	0.22484	0.22416	0.20192	0.13344	0.14358	0.13343	0.13491	0.13204	0.13443	0.13868	0.14474	0.16302	0.16221	0.17182
392	0.17443	0.17612	0.18022	0.17622	0.17409	0.16981	0.17959	0.13429	0.12516	0.18137	0.16903	0.12989	0.11713	0.11499	0.11844	0.18606	0.18337	0.18315	0.15424	0.17287	0.13285	0.11901	0.11525	0.16482	0.17163	0.16417	0.1099	0.10966	0.1082	0.11277	0.099721	0.12319	0.17825	0.19483	0.17532	0.18365	0.18311	0.16411	0.11195	0.11947	0.11194	0.11311	0.11087	0.11251	0.11593	0.11987	0.13329	0.13258	0.1402
393	0.14248	0.14358	0.14674	0.144	0.14244	0.13885	0.14585	0.11236	0.10635	0.14722	0.13804	0.10927	0.10099	0.099575	0.10127	0.15105	0.14896	0.14875	0.12691	0.14085	0.11123	0.10154	0.098866	0.13454	0.13982	0.13405	0.095139	0.095148	0.094085	0.097449	0.088982	0.10422	0.14535	0.15803	0.14323	0.14955	0.14916	0.13408	0.096687	0.10201	0.096678	0.097575	0.095886	0.096943	0.099586	0.10194	0.11121	0.11065	0.11629
394	0.11815	0.1188	0.12107	0.11933	0.11826	0.11547	0.12013	0.096827	0.093148	0.12112	0.11474	0.094782	0.089791	0.088913	0.089431	0.12402	0.12251	0.12233	0.10688	0.11664	0.095986	0.089498	0.087654	0.11202	0.11586	0.11167	0.085136	0.085303	0.084536	0.086976	0.081816	0.091087	0.12016	0.1292	0.11873	0.1232	0.12294	0.11178	0.086289	0.089939	0.086282	0.086959	0.085707	0.086348	0.088357	0.089588	0.0957	0.095269	0.099257
395	0.1007	0.10103	0.10257	0.10158	0.1009	0.098831	0.10172	0.086268	0.084235	0.10239	0.098217	0.084987	0.082298	0.081813	0.081546	0.10447	0.10343	0.10329	0.092934	0.099417	0.085659	0.081482	0.080241	0.096198	0.098848	0.095963	0.078588	0.078855	0.078302	0.080068	0.077248	0.082323	0.10202	0.10809	0.10114	0.1041	0.10394	0.096116	0.079448	0.081889	0.079442	0.079957	0.079027	0.079376	0.080913	0.081378	0.085228	0.084907	0.08765
396	0.088745	0.088868	0.089866	0.089387	0.088983	0.08749	0.089138	0.07933	0.078441	0.089564	0.086989	0.07859	0.077503	0.0773	0.076503	0.090999	0.090316	0.090215	0.083584	0.087692	0.078895	0.076352	0.075541	0.08552	0.087289	0.085366	0.074506	0.074838	0.074442	0.07572	0.074564	0.076678	0.089575	0.093425	0.089072	0.090929	0.090842	0.085539	0.075153	0.076729	0.075147	0.075545	0.07485	0.074992	0.076185	0.076123	0.078387	0.078148	0.08
397	0.080832	0.08082	0.081434	0.081298	0.081089	0.080018	0.080817	0.074973	0.074887	0.081075	0.07961	0.074617	0.074658	0.074659	0.073497	0.082045	0.081614	0.081541	0.077526	0.079971	0.074667	0.073287	0.072786	0.078543	0.079686	0.078446	0.072195	0.072571	0.072287	0.073212	0.073247	0.073253	0.081321	0.083615	0.08108	0.082161	0.082123	0.078627	0.072686	0.073639	0.072681	0.072993	0.072469	0.072464	0.073406	0.072975	0.074118	0.073938	0.075156
398	0.075795	0.075694	0.076039	0.076134	0.076061	0.075293	0.07551	0.072465	0.07295	0.075651	0.074957	0.072386	0.073227	0.073376	0.07196	0.07629	0.076037	0.075984	0.073808	0.075081	0.072256	0.071709	0.071432	0.074181	0.074882	0.074124	0.071162	0.071569	0.071366	0.072035	0.072923	0.071421	0.076047	0.077261	0.075987	0.076527	0.076523	0.074308	0.071539	0.072042	0.071534	0.071784	0.071385	0.071274	0.072034	0.071341	0.071682	0.071547	0.072309
399	0.07281	0.072647	0.072802	0.073058	0.07308	0.072532	0.072341	0.071294	0.072185	0.072399	0.07225	0.071413	0.072824	0.07308	0.071487	0.072803	0.072674	0.072636	0.071768	0.072206	0.071155	0.071207	0.071092	0.071684	0.072068	0.071656	0.071052	0.07148	0.071336	0.071821	0.073319	0.07074	0.072896	0.073349	0.072963	0.07312	0.073139	0.071842	0.071346	0.071525	0.071342	0.071548	0.071239	0.071051	0.071681	0.070802	0.070569	0.070466	0.070899
400	0.071297	0.071092	0.07111	0.07148	0.07157	0.071181	0.070701	0.071084	0.072265	0.0707	0.07094	0.071346	0.073163	0.073496	0.071779	0.070933	0.070894	0.070867	0.070937	0.070776	0.070999	0.071479	0.071481	0.070527	0.070683	0.070519	0.071606	0.072049	0.071947	0.072299	0.074233	0.070885	0.071265	0.071176	0.071422	0.071306	0.071342	0.070705	0.071841	0.071786	0.071837	0.07201	0.071767	0.071525	0.07206	0.071049	0.070406	0.070327	0.070523
401	0.070845	0.07061	0.07053	0.070979	0.071118	0.070845	0.07016	0.071566	0.072954	0.070117	0.070634	0.071929	0.074035	0.074425	0.072621	0.070227	0.070253	0.070233	0.070975	0.070386	0.071519	0.072307	0.072392	0.070332	0.070324	0.070339	0.072635	0.07309	0.073018	0.073276	0.07552	0.071624	0.070729	0.070251	0.07095	0.070638	0.070686	0.070524	0.072828	0.072607	0.072824	0.072975	0.072778	0.072496	0.072965	0.071859	0.070924	0.070861	0.070889
402	0.071154	0.070899	0.070749	0.071255	0.071429	0.071238	0.070408	0.072543	0.074081	0.070335	0.07105	0.072979	0.075292	0.075724	0.073857	0.070357	0.070429	0.070415	0.071636	0.070742	0.072526	0.073534	0.073679	0.070828	0.070704	0.070846	0.074005	0.07447	0.074418	0.07461	0.077076	0.072788	0.07098	0.070225	0.071246	0.070796	0.070851	0.071029	0.074169	0.073828	0.074165	0.074301	0.074137	0.073826	0.074249	0.073074	0.071931	0.071879	0.071788
403	0.072011	0.071741	0.071542	0.072089	0.072287	0.072156	0.071221	0.073877	0.075523	0.071128	0.071985	0.074363	0.076827	0.07729	0.075377	0.071087	0.071192	0.071181	0.072745	0.071634	0.073881	0.075047	0.075235	0.071819	0.071612	0.071845	0.07562	0.076093	0.076055	0.076201	0.078828	0.074256	0.071796	0.070844	0.072095	0.071545	0.071606	0.072026	0.075764	0.075339	0.07576	0.075886	0.075744	0.075412	0.075804	0.074578	0.073287	0.073242	0.073068
404	0.073269	0.072989	0.072754	0.07333	0.073547	0.073456	0.072448	0.07547	0.077197	0.072341	0.073298	0.075991	0.078566	0.079053	0.077105	0.072255	0.072385	0.072375	0.074181	0.072918	0.075491	0.07677	0.076988	0.073172	0.072906	0.073203	0.077414	0.077895	0.077865	0.077981	0.080723	0.075947	0.073026	0.071933	0.073347	0.072727	0.072792	0.073381	0.077545	0.077061	0.077541	0.077662	0.077533	0.077186	0.077559	0.076294	0.074899	0.074858	0.074627
405	0.074802	0.074515	0.074254	0.074852	0.075082	0.075021	0.073958	0.077243	0.079031	0.073841	0.074871	0.077787	0.080447	0.080953	0.078977	0.073723	0.073871	0.073862	0.075842	0.07447	0.077276	0.078638	0.078878	0.074773	0.074467	0.074808	0.079332	0.07982	0.079795	0.079892	0.08272	0.077791	0.07454	0.073346	0.074878	0.074208	0.074275	0.074982	0.079455	0.078929	0.079451	0.079569	0.079449	0.079089	0.079452	0.078155	0.076686	0.076646	0.076377
406	0.076529	0.076237	0.075958	0.076573	0.076813	0.076771	0.075667	0.079142	0.08098	0.075545	0.076629	0.079703	0.082431	0.082953	0.080952	0.075404	0.075566	0.075556	0.077662	0.076213	0.079186	0.080609	0.080865	0.076549	0.076214	0.076588	0.081337	0.081834	0.081812	0.081898	0.084793	0.079744	0.076256	0.074987	0.076605	0.075898	0.075967	0.076757	0.081457	0.080902	0.081453	0.081571	0.081455	0.081085	0.081445	0.08012	0.078598	0.078557	0.078264
407	0.078398	0.078101	0.077808	0.078438	0.078685	0.078657	0.077521	0.081134	0.083015	0.077395	0.07852	0.081705	0.084492	0.085029	0.083002	0.077238	0.077411	0.077399	0.079597	0.078093	0.081186	0.082657	0.082923	0.078452	0.078097	0.078493	0.083408	0.083915	0.083893	0.083975	0.086924	0.081776	0.078117	0.076792	0.078475	0.077741	0.077811	0.078657	0.083528	0.082953	0.083524	0.083644	0.083528	0.08315	0.083512	0.082161	0.080599	0.080556	0.080249
408	0.08037	0.08007	0.079767	0.08041	0.080663	0.080643	0.079479	0.083195	0.085115	0.079352	0.080509	0.083773	0.086614	0.087165	0.085112	0.079183	0.079366	0.079352	0.081618	0.080074	0.083254	0.084763	0.085037	0.080448	0.08008	0.080491	0.08553	0.086048	0.086024	0.086107	0.089103	0.083869	0.080085	0.078718	0.080451	0.079697	0.079766	0.080649	0.085652	0.085064	0.085649	0.085772	0.085653	0.085267	0.085636	0.084259	0.082668	0.082621	0.082308
409	0.082416	0.082112	0.081801	0.082456	0.082715	0.082699	0.081512	0.085306	0.087265	0.081385	0.082568	0.085888	0.088782	0.089347	0.087266	0.081208	0.081398	0.081381	0.083701	0.082127	0.085372	0.086913	0.087193	0.082509	0.082134	0.082555	0.087691	0.088222	0.088193	0.088283	0.091322	0.086006	0.082129	0.080728	0.082501	0.081731	0.081801	0.082705	0.087818	0.087221	0.087814	0.087943	0.087818	0.087425	0.087805	0.0864	0.084785	0.084733	0.08442
410	0.08452	0.084212	0.083895	0.084563	0.084827	0.084812	0.083601	0.087459	0.089458	0.083475	0.084682	0.088043	0.090991	0.091571	0.089458	0.083293	0.083491	0.08347	0.085833	0.084236	0.087532	0.0891	0.089385	0.084623	0.084242	0.08467	0.089884	0.090431	0.090397	0.090496	0.093578	0.088181	0.084234	0.082802	0.084611	0.083827	0.083897	0.084813	0.090019	0.089416	0.090015	0.09015	0.090019	0.089618	0.090012	0.088578	0.086943	0.086884	0.086576
411	0.086668	0.086356	0.086033	0.086715	0.086984	0.086967	0.085733	0.089646	0.091686	0.08561	0.086838	0.09023	0.093236	0.093832	0.091682	0.085423	0.085629	0.085603	0.088003	0.086388	0.089724	0.09132	0.091608	0.086775	0.086393	0.086825	0.092107	0.092671	0.092631	0.092741	0.095867	0.090387	0.086383	0.084925	0.086766	0.08597	0.086039	0.08696	0.092251	0.091645	0.092247	0.09239	0.092249	0.09184	0.092253	0.090786	0.089134	0.089067	0.088767
412	0.088847	0.088531	0.088202	0.088899	0.089173	0.089154	0.087895	0.091859	0.093945	0.087774	0.089024	0.092443	0.095513	0.096125	0.093934	0.087584	0.087798	0.087766	0.090201	0.08857	0.091943	0.093566	0.093858	0.088956	0.088573	0.089008	0.094356	0.094938	0.094891	0.095017	0.09819	0.092619	0.088565	0.08708	0.088953	0.088146	0.088214	0.089134	0.09451	0.093902	0.094505	0.094659	0.094506	0.094088	0.094522	0.093019	0.091349	0.091274	0.090986
413	0.091055	0.090733	0.0904	0.091113	0.091393	0.091368	0.090083	0.094098	0.096235	0.089965	0.091238	0.094681	0.097821	0.098452	0.096215	0.089773	0.089995	0.089957	0.092427	0.09078	0.094188	0.09584	0.096134	0.091164	0.090781	0.091217	0.09663	0.097234	0.097179	0.097322	0.10055	0.094876	0.090776	0.089263	0.09117	0.090351	0.090418	0.091334	0.096797	0.096188	0.096792	0.096956	0.09679	0.096362	0.096822	0.095277	0.09359	0.093504	0.09323
414	0.093286	0.092958	0.092619	0.093351	0.093638	0.093607	0.092291	0.09636	0.098554	0.092176	0.093476	0.096942	0.10016	0.10081	0.098522	0.091983	0.092214	0.092169	0.094676	0.093013	0.096457	0.09814	0.098437	0.093392	0.09301	0.093448	0.09893	0.099559	0.099494	0.099657	0.10294	0.097158	0.09301	0.091469	0.093411	0.09258	0.092646	0.093554	0.099111	0.098502	0.099106	0.099283	0.099102	0.098663	0.099151	0.09756	0.095853	0.095756	0.095499
415	0.095542	0.095208	0.094863	0.095616	0.09591	0.095871	0.094522	0.098648	0.10091	0.094411	0.095739	0.099229	0.10253	0.10321	0.10086	0.094216	0.094457	0.094404	0.096951	0.095271	0.098752	0.10047	0.10077	0.095645	0.095265	0.095703	0.10126	0.10191	0.10184	0.10202	0.10537	0.099466	0.095271	0.093697	0.095679	0.094834	0.0949	0.095797	0.10146	0.10085	0.10145	0.10164	0.10144	0.10099	0.10151	0.099871	0.098142	0.098032	0.097794
416	0.097823	0.097481	0.09713	0.097907	0.098208	0.098161	0.096774	0.10096	0.10329	0.096668	0.098026	0.10154	0.10494	0.10565	0.10323	0.096471	0.096723	0.096662	0.099251	0.097553	0.10108	0.10283	0.10313	0.097921	0.097543	0.097982	0.10362	0.1043	0.10422	0.10443	0.10784	0.1018	0.097557	0.095947	0.097974	0.097113	0.097177	0.098063	0.10383	0.10323	0.10383	0.10403	0.10382	0.10335	0.10391	0.10221	0.10046	0.10033	0.10012
417	0.10013	0.099782	0.099423	0.10023	0.10054	0.10048	0.09905	0.10331	0.10571	0.098949	0.10034	0.10389	0.1074	0.10813	0.10564	0.098751	0.099014	0.098944	0.10158	0.099862	0.10343	0.10523	0.10553	0.10022	0.099847	0.10029	0.10601	0.10673	0.10663	0.10687	0.11036	0.10417	0.099871	0.098222	0.1003	0.099419	0.099483	0.10035	0.10625	0.10564	0.10624	0.10646	0.10623	0.10575	0.10634	0.10458	0.1028	0.10266	0.10247
418	0.10247	0.10211	0.10174	0.10258	0.1029	0.10283	0.10135	0.10569	0.10818	0.10126	0.10269	0.10626	0.10989	0.11065	0.10808	0.10106	0.10133	0.10125	0.10394	0.1022	0.10582	0.10766	0.10797	0.10255	0.10218	0.10262	0.10844	0.1092	0.10908	0.10936	0.11293	0.10658	0.10221	0.10052	0.10265	0.10175	0.10182	0.10267	0.1087	0.10809	0.10869	0.10894	0.10867	0.10818	0.10882	0.10699	0.10518	0.10502	0.10486
419	0.10484	0.10447	0.10409	0.10496	0.10529	0.10521	0.10368	0.1081	0.11069	0.10359	0.10506	0.10868	0.11244	0.11323	0.11057	0.10339	0.10368	0.10359	0.10634	0.10457	0.10824	0.11013	0.11044	0.10491	0.10454	0.10498	0.11092	0.11171	0.11158	0.11189	0.11556	0.10902	0.10459	0.10285	0.10504	0.10412	0.10418	0.10502	0.1112	0.11059	0.11119	0.11146	0.11117	0.11065	0.11134	0.10943	0.10759	0.10741	0.10728
420	0.10725	0.10686	0.10648	0.10738	0.10772	0.10763	0.10604	0.11056	0.11325	0.10596	0.10748	0.11113	0.11504	0.11587	0.11311	0.10576	0.10606	0.10596	0.10877	0.10698	0.11071	0.11265	0.11297	0.10731	0.10694	0.10738	0.11344	0.11428	0.11413	0.11448	0.11826	0.1115	0.107	0.10521	0.10747	0.10653	0.10659	0.1074	0.11375	0.11314	0.11374	0.11403	0.11371	0.11317	0.11392	0.11192	0.11004	0.10985	0.10974
421	0.10969	0.1093	0.1089	0.10984	0.1102	0.11008	0.10844	0.11305	0.11587	0.10836	0.10993	0.11362	0.1177	0.11858	0.1157	0.10816	0.10848	0.10836	0.11125	0.10942	0.11322	0.11523	0.11555	0.10974	0.10938	0.10982	0.11601	0.1169	0.11673	0.11712	0.12102	0.11404	0.10946	0.1076	0.10993	0.10897	0.10903	0.10982	0.11635	0.11575	0.11634	0.11665	0.1163	0.11574	0.11655	0.11446	0.11254	0.11232	0.11225
422	0.11218	0.11177	0.11136	0.11235	0.11272	0.11259	0.11087	0.1156	0.11855	0.1108	0.11243	0.11617	0.12043	0.12135	0.11834	0.1106	0.11094	0.1108	0.11376	0.1119	0.11578	0.11785	0.11818	0.11221	0.11186	0.1123	0.11863	0.11958	0.11939	0.11983	0.12386	0.11662	0.11195	0.11003	0.11244	0.11145	0.11151	0.11227	0.11901	0.11841	0.119	0.11934	0.11895	0.11837	0.11925	0.11704	0.11508	0.11483	0.11481
423	0.11471	0.11428	0.11386	0.1149	0.11528	0.11513	0.11333	0.1182	0.12129	0.11328	0.11497	0.11876	0.12322	0.1242	0.12105	0.11307	0.11344	0.11328	0.11633	0.11443	0.11839	0.12054	0.12087	0.11473	0.11438	0.11482	0.12132	0.12233	0.12211	0.12261	0.12678	0.11926	0.11449	0.1125	0.115	0.11397	0.11403	0.11477	0.12173	0.12113	0.12172	0.12209	0.12167	0.12105	0.122	0.11968	0.11768	0.1174	0.11742
424	0.11729	0.11684	0.11641	0.1175	0.11791	0.11773	0.11585	0.12085	0.12411	0.1158	0.11756	0.12141	0.1261	0.12714	0.12383	0.11559	0.11598	0.11581	0.11895	0.11701	0.12106	0.1233	0.12363	0.11729	0.11695	0.11739	0.12407	0.12515	0.12491	0.12546	0.1298	0.12196	0.11708	0.11501	0.11761	0.11655	0.1166	0.11731	0.12452	0.12393	0.12451	0.12492	0.12445	0.12381	0.12484	0.12239	0.12033	0.12002	0.12008
425	0.11993	0.11946	0.11901	0.12017	0.12059	0.12039	0.11841	0.12357	0.12701	0.11838	0.12022	0.12413	0.12907	0.13017	0.12669	0.11817	0.11858	0.11839	0.12164	0.11965	0.1238	0.12613	0.12647	0.11992	0.11958	0.12002	0.1269	0.12806	0.12779	0.12841	0.13293	0.12473	0.11973	0.11757	0.12028	0.11918	0.11924	0.11991	0.1274	0.12681	0.12739	0.12784	0.12732	0.12664	0.12777	0.12517	0.12304	0.1227	0.12282
426	0.12263	0.12214	0.12168	0.12289	0.12334	0.12311	0.12103	0.12636	0.13	0.121	0.12293	0.12692	0.13213	0.13331	0.12963	0.12079	0.12124	0.12102	0.12439	0.12235	0.12661	0.12905	0.12939	0.1226	0.12226	0.12271	0.12981	0.13106	0.13075	0.13145	0.13618	0.12758	0.12245	0.12019	0.12302	0.12188	0.12193	0.12257	0.13037	0.12977	0.13035	0.13085	0.13027	0.12955	0.13079	0.12802	0.12583	0.12545	0.12563
427	0.1254	0.12488	0.1244	0.12569	0.12616	0.1259	0.1237	0.12923	0.13309	0.12369	0.12571	0.12978	0.1353	0.13657	0.13266	0.12348	0.12395	0.12371	0.12721	0.12511	0.12949	0.13205	0.1324	0.12534	0.12501	0.12546	0.13281	0.13416	0.13381	0.13459	0.13955	0.13051	0.12522	0.12285	0.12583	0.12464	0.12468	0.12528	0.13342	0.13283	0.13341	0.13395	0.13332	0.13256	0.1339	0.13095	0.12869	0.12826	0.12851
428	0.12824	0.12769	0.12719	0.12856	0.12906	0.12877	0.12644	0.13218	0.13629	0.12644	0.12857	0.13272	0.13859	0.13995	0.1358	0.12622	0.12673	0.12646	0.13011	0.12795	0.13247	0.13515	0.13551	0.12815	0.12784	0.12828	0.13591	0.13736	0.13698	0.13785	0.14306	0.13353	0.12808	0.12559	0.12871	0.12747	0.12751	0.12806	0.13659	0.136	0.13657	0.13717	0.13647	0.13566	0.13713	0.13398	0.13163	0.13116	0.13148
429	0.13117	0.13059	0.13006	0.13153	0.13206	0.13173	0.12925	0.13523	0.13962	0.12927	0.13152	0.13577	0.14203	0.1435	0.13907	0.12905	0.1296	0.1293	0.13311	0.13087	0.13555	0.13838	0.13875	0.13105	0.13075	0.13119	0.13914	0.14071	0.14028	0.14125	0.14676	0.13666	0.13102	0.1284	0.13169	0.13039	0.13043	0.13093	0.13989	0.1393	0.13987	0.14053	0.13975	0.13889	0.1405	0.13712	0.13468	0.13415	0.13455
430	0.13419	0.13358	0.13302	0.13459	0.13515	0.13478	0.13214	0.13839	0.1431	0.13218	0.13456	0.13893	0.14562	0.14721	0.14247	0.13196	0.13255	0.13222	0.1362	0.13389	0.13874	0.14174	0.14212	0.13404	0.13375	0.13419	0.14249	0.1442	0.14371	0.14481	0.15065	0.13991	0.13406	0.13129	0.13476	0.1334	0.13343	0.13388	0.14332	0.14273	0.1433	0.14403	0.14317	0.14224	0.14402	0.14038	0.13783	0.13724	0.13774
431	0.13731	0.13666	0.13607	0.13775	0.13835	0.13794	0.13512	0.14166	0.14672	0.13518	0.13771	0.1422	0.14938	0.1511	0.14601	0.13496	0.13559	0.13522	0.1394	0.137	0.14205	0.14522	0.14562	0.13713	0.13684	0.13729	0.14598	0.14784	0.14729	0.14852	0.15473	0.14328	0.1372	0.13426	0.13794	0.1365	0.13654	0.13692	0.1469	0.14631	0.14688	0.14768	0.14672	0.14573	0.14769	0.14377	0.1411	0.14044	0.14104
432	0.14053	0.13984	0.13922	0.14103	0.14167	0.1412	0.13819	0.14506	0.1505	0.13827	0.14096	0.14559	0.15331	0.15519	0.1497	0.13804	0.13873	0.13832	0.14272	0.14022	0.14548	0.14886	0.14928	0.14031	0.14004	0.14049	0.14962	0.15165	0.15104	0.1524	0.15904	0.14679	0.14045	0.13732	0.14124	0.13971	0.13974	0.14006	0.15064	0.15005	0.15062	0.15151	0.15044	0.14937	0.15153	0.14729	0.14448	0.14376	0.14446
433	0.1439	0.14316	0.1425	0.14445	0.14514	0.14461	0.14137	0.14862	0.15451	0.14148	0.14435	0.14914	0.1575	0.15955	0.15361	0.14125	0.142	0.14154	0.14619	0.14358	0.14909	0.1527	0.15313	0.14363	0.14337	0.14382	0.15346	0.15568	0.155	0.15653	0.16367	0.15048	0.14383	0.1405	0.14467	0.14306	0.14309	0.14333	0.15459	0.154	0.15457	0.15556	0.15437	0.15321	0.1556	0.15099	0.14804	0.14722	0.14805
434	0.1474	0.14661	0.14591	0.14802	0.14876	0.14816	0.14468	0.15235	0.15874	0.14481	0.14789	0.15286	0.16193	0.16418	0.15772	0.14458	0.14539	0.14488	0.14981	0.14707	0.15286	0.15674	0.15719	0.14708	0.14684	0.14729	0.1575	0.15995	0.15918	0.1609	0.16861	0.15435	0.14736	0.1438	0.14826	0.14655	0.14657	0.14672	0.15877	0.15818	0.15874	0.15984	0.15852	0.15725	0.1599	0.15488	0.15175	0.15084	0.15182
435	0.15105	0.1502	0.14946	0.15174	0.15254	0.15187	0.14811	0.15625	0.16322	0.14827	0.15158	0.15675	0.16663	0.16911	0.16206	0.14804	0.14893	0.14835	0.1536	0.15072	0.15682	0.161	0.16148	0.15068	0.15046	0.15091	0.16177	0.16446	0.1636	0.16553	0.1739	0.15842	0.15105	0.14722	0.15201	0.15018	0.15019	0.15026	0.16318	0.16258	0.16315	0.16437	0.1629	0.16151	0.16446	0.15896	0.15564	0.15463	0.15576
436	0.15489	0.15397	0.15317	0.15566	0.15652	0.15578	0.15169	0.16038	0.168	0.15189	0.15546	0.16088	0.17169	0.17444	0.1667	0.15165	0.15263	0.15198	0.15759	0.15455	0.16101	0.16554	0.16605	0.15446	0.15425	0.15471	0.16632	0.1693	0.16833	0.17051	0.17966	0.16274	0.15492	0.1508	0.15596	0.15399	0.154	0.15396	0.1679	0.16729	0.16787	0.16924	0.16759	0.16606	0.16935	0.16331	0.15975	0.15863	0.15993
437	0.15894	0.15794	0.15708	0.15979	0.16073	0.15989	0.15545	0.16476	0.17314	0.15569	0.15955	0.16525	0.17714	0.18021	0.17167	0.15545	0.15651	0.1558	0.16181	0.15858	0.16547	0.1704	0.17094	0.15844	0.15825	0.15871	0.1712	0.17451	0.17341	0.17587	0.18595	0.16733	0.159	0.15455	0.16012	0.15801	0.15801	0.15785	0.17296	0.17234	0.17293	0.17447	0.17261	0.17093	0.17461	0.16793	0.16412	0.16285	0.16436
438	0.16321	0.16212	0.1612	0.16417	0.16519	0.16425	0.1594	0.16942	0.17867	0.15968	0.16388	0.1699	0.18304	0.18648	0.177	0.15943	0.1606	0.1598	0.16629	0.16284	0.1702	0.17561	0.17618	0.16263	0.16247	0.16293	0.17643	0.18013	0.17889	0.18166	0.19284	0.17224	0.16331	0.15848	0.16453	0.16225	0.16224	0.16195	0.17842	0.17777	0.17838	0.1801	0.17802	0.17615	0.18029	0.17288	0.16875	0.16734	0.16907
439	0.16776	0.16657	0.16556	0.16883	0.16996	0.16889	0.16358	0.17442	0.1847	0.16391	0.16849	0.1749	0.18953	0.19341	0.18281	0.16365	0.16494	0.16405	0.17107	0.16737	0.1753	0.18126	0.18189	0.16709	0.16695	0.16743	0.18212	0.18628	0.18487	0.18802	0.20055	0.17755	0.1679	0.16264	0.16923	0.16676	0.16674	0.16631	0.18437	0.18369	0.18433	0.18628	0.18392	0.18183	0.1865	0.17823	0.17374	0.17214	0.17414
440	0.17261	0.1713	0.17021	0.17381	0.17505	0.17384	0.168	0.1798	0.19128	0.16839	0.17341	0.18028	0.19665	0.20106	0.18914	0.16812	0.16955	0.16855	0.17619	0.1722	0.1808	0.18741	0.1881	0.17184	0.17172	0.17221	0.18832	0.19301	0.19141	0.195	0.20916	0.18329	0.1728	0.16704	0.17426	0.17156	0.17154	0.17094	0.19087	0.19015	0.19083	0.19303	0.19036	0.18802	0.1933	0.18402	0.1791	0.1773	0.17959
441	0.17782	0.17638	0.17518	0.17918	0.18055	0.17919	0.17272	0.18566	0.19857	0.17318	0.17871	0.18615	0.20461	0.20966	0.19614	0.1729	0.17449	0.17336	0.18174	0.1774	0.1868	0.19419	0.19496	0.17695	0.17686	0.17736	0.19519	0.20051	0.19868	0.20279	0.21899	0.18958	0.17808	0.17174	0.17969	0.17672	0.17669	0.1759	0.19809	0.19729	0.19804	0.20055	0.19751	0.19485	0.20087	0.19038	0.18493	0.18289	0.18552
442	0.18346	0.18185	0.18054	0.18499	0.18652	0.18497	0.17779	0.19208	0.20669	0.17832	0.18445	0.19258	0.21356	0.21939	0.20392	0.17803	0.1798	0.17853	0.18776	0.18301	0.19338	0.20171	0.20258	0.18246	0.1824	0.18292	0.20283	0.20892	0.20682	0.21153	0.23029	0.19651	0.18378	0.17677	0.18556	0.18228	0.18224	0.18125	0.20615	0.20525	0.20609	0.20897	0.20549	0.20245	0.20934	0.1974	0.19131	0.189	0.19202
443	0.18961	0.18781	0.18635	0.19134	0.19306	0.19129	0.18326	0.19918	0.21586	0.18388	0.19072	0.19972	0.22378	0.23059	0.21271	0.18358	0.18556	0.18412	0.19439	0.18913	0.20068	0.21018	0.21117	0.18847	0.18844	0.18899	0.21146	0.21849	0.21607	0.22152	0.24357	0.20425	0.19	0.1822	0.192	0.18834	0.18829	0.18708	0.21529	0.21424	0.21523	0.21854	0.21454	0.21103	0.21898	0.20526	0.19838	0.19574	0.19921
444	0.19635	0.19433	0.1927	0.19832	0.20025	0.19825	0.18922	0.20711	0.2263	0.18993	0.19762	0.20771	0.23557	0.24359	0.22271	0.18961	0.19184	0.19021	0.20172	0.19584	0.20885	0.21978	0.22094	0.19506	0.19505	0.19565	0.22131	0.22949	0.22668	0.23301	0.25933	0.21298	0.19683	0.18809	0.19907	0.19498	0.19491	0.19345	0.22575	0.22449	0.22567	0.22952	0.22488	0.2208	0.23003	0.21413	0.20627	0.20325	0.20723
445	0.20383	0.20154	0.19971	0.20607	0.20827	0.20597	0.19575	0.21607	0.23838	0.19658	0.20528	0.21677	0.24938	0.25894	0.23428	0.19623	0.19876	0.19691	0.20992	0.20328	0.21812	0.23085	0.23224	0.20236	0.20238	0.20304	0.23274	0.24235	0.23907	0.24648	0.27842	0.22295	0.2044	0.19455	0.20694	0.20231	0.20224	0.20051	0.23792	0.23635	0.23783	0.24234	0.23693	0.23211	0.24292	0.22431	0.21518	0.2117	0.2163
446	0.2122	0.2096	0.20751	0.21477	0.21729	0.21466	0.203	0.22635	0.25257	0.20397	0.21389	0.22721	0.26587	0.27742	0.24789	0.20358	0.20646	0.20434	0.21923	0.21162	0.22879	0.24383	0.24553	0.21055	0.21058	0.21133	0.24626	0.25768	0.25382	0.26254	0.3021	0.23454	0.21289	0.20168	0.2158	0.21051	0.21042	0.2084	0.25234	0.25032	0.25223	0.25756	0.2512	0.24544	0.25822	0.23617	0.22542	0.22138	0.22669
447	0.2217	0.2187	0.2163	0.22467	0.22758	0.22454	0.21113	0.23833	0.26953	0.21226	0.2237	0.23945	0.28593	0.30008	0.26423	0.21182	0.21513	0.2127	0.22993	0.22108	0.24129	0.25934	0.26147	0.21986	0.21988	0.22076	0.26256	0.27632	0.27174	0.28209	0.33212	0.24826	0.22252	0.20965	0.22588	0.21978	0.21967	0.21736	0.26977	0.26708	0.26965	0.276	0.26846	0.26147	0.27674	0.25026	0.23737	0.23265	0.23879
448	0.23262	0.22914	0.22635	0.23607	0.23947	0.23596	0.22037	0.25257	0.29022	0.2217	0.23504	0.25411	0.31088	0.32846	0.28426	0.22119	0.22502	0.22221	0.24245	0.23198	0.25623	0.27828	0.28102	0.23059	0.23059	0.23166	0.28271	0.29952	0.29405	0.30643	0.37108	0.26486	0.23361	0.21867	0.23754	0.2304	0.23029	0.22769	0.29135	0.28762	0.29119	0.29885	0.28984	0.28121	0.29965	0.26738	0.25159	0.24603	0.25316
449	0.24539	0.2413	0.23801	0.24942	0.25345	0.24937	0.23105	0.26984	0.31599	0.23261	0.24837	0.27208	0.34259	0.36473	0.30942	0.232	0.23648	0.23321	0.25738	0.24473	0.27448	0.30197	0.30561	0.24321	0.24312	0.24446	0.30827	0.32912	0.32253	0.33744	0.4226	0.28544	0.24657	0.22904	0.25123	0.24277	0.24264	0.2398	0.31869	0.31339	0.31851	0.32784	0.31697	0.30612	0.32867	0.2887	0.26891	0.26228	0.27057
450	0.26056	0.25571	0.25177	0.26531	0.27014	0.26539	0.24359	0.29127	0.34872	0.24545	0.26434	0.29464	0.38367	0.41186	0.34174	0.24467	0.25	0.24615	0.27556	0.25994	0.29732	0.33233	0.33728	0.25831	0.25805	0.25982	0.34151	0.36778	0.35979	0.37779	0.49127	0.31159	0.26201	0.24112	0.2676	0.25741	0.25727	0.2543	0.3542	0.34647	0.35397	0.36545	0.35225	0.33838	0.36624	0.31593	0.29051	0.28252	0.29216
451	0.27899	0.27316	0.26835	0.28463	0.29051	0.28498	0.25865	0.31861	0.39127	0.2609	0.28392	0.32382	0.43792	0.47386	0.38442	0.25986	0.26627	0.2617	0.29828	0.2785	0.32674	0.37236	0.3793	0.27685	0.27626	0.27869	0.38607	0.41957	0.40987	0.43152	0.58149	0.34588	0.28078	0.25551	0.2876	0.2751	0.27497	0.2721	0.40156	0.39005	0.40127	0.41547	0.39941	0.38139	0.41606	0.3518	0.31829	0.30853	0.3197
452	0.30188	0.29479	0.28879	0.30866	0.31593	0.30949	0.27718	0.35446	0.44754	0.27992	0.30855	0.36268	0.50992	0.55491	0.44198	0.27849	0.28633	0.28085	0.32745	0.30171	0.36578	0.42646	0.43638	0.30024	0.29907	0.30253	0.44717	0.48993	0.47832	0.50377	0.69196	0.39217	0.30416	0.27302	0.31262	0.29698	0.29687	0.29458	0.46592	0.44866	0.46555	0.48303	0.46369	0.44013	0.4831	0.40043	0.35513	0.34307	0.3559
453	0.33104	0.32229	0.31465	0.33926	0.34841	0.34097	0.30061	0.40272	0.52225	0.30403	0.34039	0.41568	0.60327	0.6561	0.52015	0.30195	0.31174	0.30507	0.36598	0.33157	0.41893	0.50053	0.51476	0.33064	0.32843	0.33355	0.53145	0.58459	0.57128	0.59935	0.80606	0.45612	0.33405	0.29488	0.34474	0.32472	0.32467	0.32384	0.55338	0.52801	0.55293	0.5737	0.55131	0.52103	0.5727	0.46771	0.40553	0.39044	0.40488
454	0.36917	0.35827	0.3483	0.37923	0.39093	0.38251	0.33119	0.46886	0.61893	0.33553	0.38275	0.48869	0.71453	0.76773	0.62339	0.3324	0.34491	0.33666	0.41817	0.37117	0.49239	0.60037	0.61989	0.37143	0.36744	0.37524	0.64348	0.70352	0.68997	0.71646	0.89038	0.54475	0.37332	0.323	0.38707	0.3609	0.36096	0.36317	0.66683	0.63242	0.66633	0.6886	0.66532	0.62929	0.68585	0.56061	0.47605	0.45708	0.4727
455	0.42029	0.40663	0.39333	0.43263	0.44772	0.43859	0.37238	0.55898	0.73305	0.37807	0.44049	0.5867	0.82361	0.86316	0.74608	0.37316	0.38955	0.37919	0.48982	0.42515	0.59204	0.72377	0.74701	0.42772	0.42077	0.43283	0.77398	0.82762	0.81702	0.83458	0.92203	0.66181	0.42625	0.3603	0.44411	0.40935	0.40961	0.41749	0.79391	0.75569	0.79348	0.81223	0.79334	0.75831	0.80764	0.68128	0.57425	0.55085	0.56654
456	0.4899	0.47292	0.45501	0.50485	0.52419	0.51508	0.42952	0.67445	0.84219	0.43713	0.5199	0.70615	0.89757	0.91381	0.86028	0.42935	0.45121	0.43805	0.58643	0.50002	0.71543	0.84623	0.86664	0.50645	0.49501	0.51336	0.8869	0.91644	0.91158	0.91579	0.9091	0.79419	0.49863	0.41134	0.52163	0.47557	0.47612	0.49324	0.89766	0.86878	0.89741	0.90696	0.89794	0.87554	0.90199	0.81249	0.70157	0.67494	0.68895
457	0.58382	0.56361	0.54	0.60112	0.62462	0.61693	0.50988	0.79934	0.91197	0.52013	0.62594	0.82324	0.91905	0.91581	0.92659	0.50803	0.53713	0.52047	0.70624	0.60231	0.83761	0.92491	0.93535	0.61375	0.59698	0.62274	0.94119	0.94359	0.94367	0.9385	0.87198	0.9013	0.5962	0.48268	0.62419	0.56596	0.56679	0.59579	0.94233	0.93216	0.94231	0.94251	0.94295	0.93811	0.93914	0.91108	0.83593	0.81147	0.82221
458	0.70217	0.68085	0.65261	0.71982	0.74439	0.73974	0.61985	0.89504	0.92743	0.63307	0.75247	0.89991	0.90007	0.88666	0.93379	0.6159	0.65239	0.63233	0.82743	0.73001	0.91633	0.94055	0.94116	0.74458	0.72516	0.75457	0.93552	0.92279	0.92505	0.91699	0.82354	0.94533	0.71755	0.58177	0.74655	0.68288	0.68361	0.72063	0.93171	0.93643	0.93181	0.92728	0.93229	0.9387	0.92598	0.94472	0.92872	0.91377	0.92116
459	0.82592	0.80897	0.78263	0.83952	0.85785	0.85654	0.75343	0.93121	0.90378	0.768	0.86875	0.91897	0.86001	0.84216	0.90332	0.74863	0.78656	0.76608	0.91014	0.85625	0.93313	0.91316	0.90838	0.86698	0.85301	0.87478	0.89728	0.87899	0.88181	0.87386	0.77024	0.93247	0.84027	0.7093	0.86116	0.81118	0.81093	0.8406	0.89205	0.90424	0.8922	0.88619	0.89248	0.90335	0.88644	0.92586	0.95173	0.94733	0.95278
460	0.91417	0.90705	0.89262	0.92009	0.92628	0.92653	0.87543	0.91647	0.86066	0.88698	0.93306	0.89626	0.81013	0.79066	0.85572	0.87329	0.89956	0.88488	0.93267	0.93443	0.90722	0.86632	0.85887	0.93525	0.93319	0.93839	0.84521	0.82521	0.82797	0.82113	0.71544	0.89102	0.9224	0.8417	0.92836	0.9102	0.90845	0.91466	0.8399	0.8558	0.84006	0.83383	0.84014	0.85262	0.8352	0.88198	0.92526	0.92666	0.9316
461	0.94038	0.94228	0.94231	0.93991	0.93607	0.936	0.93892	0.87553	0.80868	0.94422	0.93634	0.85273	0.75616	0.73658	0.80063	0.9415	0.94882	0.94327	0.91035	0.94622	0.86138	0.81108	0.80221	0.9389	0.94617	0.93834	0.78729	0.76748	0.76984	0.76458	0.66079	0.83746	0.94197	0.92996	0.93615	0.94636	0.94379	0.92771	0.78252	0.80037	0.78268	0.77685	0.78254	0.79533	0.77906	0.8274	0.8773	0.88106	0.88621
462	0.91865	0.92482	0.93311	0.91536	0.90693	0.90603	0.93734	0.82293	0.75315	0.93786	0.90273	0.79955	0.70104	0.6821	0.74277	0.943	0.93751	0.93815	0.86612	0.9152	0.80664	0.75264	0.74302	0.90417	0.91546	0.90192	0.72745	0.70876	0.71056	0.70709	0.60703	0.77883	0.91663	0.94863	0.9057	0.92926	0.92677	0.89961	0.72357	0.7425	0.72371	0.7186	0.72334	0.73578	0.72146	0.76844	0.82031	0.82499	0.83067
463	0.87382	0.88134	0.89276	0.86968	0.85964	0.85797	0.89937	0.76534	0.69676	0.8977	0.85274	0.74223	0.64617	0.62827	0.68442	0.90617	0.89549	0.89873	0.81204	0.86561	0.74831	0.69353	0.68348	0.85298	0.86586	0.85003	0.66751	0.65038	0.65152	0.64996	0.55446	0.71865	0.87028	0.91968	0.85768	0.8859	0.8837	0.85212	0.6647	0.68432	0.66482	0.66058	0.66417	0.67599	0.664	0.70824	0.75985	0.76463	0.7711
464	0.81897	0.82671	0.83923	0.81479	0.80438	0.80198	0.84627	0.70611	0.64074	0.84365	0.79565	0.68354	0.59221	0.57553	0.6266	0.85351	0.84084	0.84511	0.75388	0.80814	0.68899	0.63488	0.62454	0.79473	0.80826	0.79152	0.60828	0.59295	0.59337	0.59377	0.50312	0.65848	0.81481	0.87017	0.80193	0.83137	0.82943	0.79597	0.60665	0.62681	0.60675	0.60345	0.6058	0.61686	0.60736	0.64818	0.69858	0.70305	0.71049
465	0.76004	0.76748	0.78015	0.75623	0.74606	0.74293	0.78673	0.64679	0.58566	0.78374	0.73594	0.62481	0.5394	0.524	0.56976	0.79418	0.78096	0.78551	0.69447	0.74773	0.62989	0.57717	0.56664	0.73389	0.74764	0.73064	0.55013	0.53669	0.53638	0.53875	0.45294	0.59904	0.75574	0.81209	0.74326	0.77227	0.77055	0.73627	0.54973	0.57036	0.54981	0.54749	0.54855	0.55877	0.55184	0.58891	0.63765	0.64158	0.65014
466	0.69998	0.70684	0.71925	0.69673	0.68707	0.68319	0.72491	0.58811	0.53171	0.72187	0.67573	0.56668	0.48775	0.47364	0.51408	0.73251	0.71945	0.72387	0.63515	0.68673	0.57157	0.52062	0.50993	0.67256	0.68639	0.66938	0.4932	0.48166	0.48063	0.48492	0.40383	0.54063	0.69576	0.75073	0.68395	0.71184	0.71028	0.67551	0.49404	0.51509	0.4941	0.49274	0.49251	0.50188	0.49749	0.53071	0.57759	0.58085	0.59063
467	0.64004	0.64622	0.65816	0.63746	0.62843	0.62378	0.66266	0.53041	0.4789	0.65973	0.61593	0.50948	0.43722	0.42433	0.45958	0.67041	0.65785	0.66194	0.57649	0.62612	0.51425	0.46525	0.45444	0.61162	0.6255	0.60858	0.43755	0.42786	0.42616	0.43224	0.35582	0.48337	0.636	0.68852	0.625	0.65146	0.65003	0.61482	0.43959	0.461	0.43964	0.43919	0.43772	0.44624	0.44429	0.47369	0.51862	0.52113	0.53218
468	0.58085	0.58627	0.59767	0.57899	0.57066	0.5652	0.60087	0.47383	0.4272	0.59813	0.55699	0.45337	0.38777	0.37604	0.40629	0.6088	0.5969	0.60055	0.51879	0.56637	0.45805	0.41113	0.40026	0.55154	0.56545	0.54866	0.38332	0.37538	0.37309	0.38074	0.30916	0.42734	0.57702	0.6266	0.5669	0.59181	0.59048	0.55478	0.38645	0.40809	0.38648	0.38686	0.38427	0.39197	0.39223	0.41795	0.46083	0.46259	0.47486
469	0.52272	0.52735	0.53818	0.52159	0.51396	0.50767	0.54001	0.4185	0.37662	0.5375	0.49911	0.39854	0.33952	0.32888	0.35437	0.54814	0.53696	0.54011	0.46217	0.5077	0.40309	0.3584	0.34758	0.49254	0.50649	0.48984	0.33083	0.32449	0.32174	0.33062	0.26444	0.37271	0.51909	0.56555	0.50984	0.53319	0.53194	0.49571	0.33486	0.35647	0.33488	0.33595	0.33243	0.33932	0.34149	0.36368	0.40436	0.40541	0.41876
470	0.46574	0.46958	0.47982	0.46532	0.45837	0.45128	0.48028	0.36463	0.32736	0.47799	0.44238	0.34529	0.29285	0.28328	0.30424	0.4886	0.47815	0.48081	0.40675	0.4502	0.34963	0.3075	0.29692	0.43475	0.4487	0.43223	0.28074	0.27584	0.27282	0.28244	0.22269	0.3199	0.46226	0.50557	0.45388	0.47569	0.47452	0.43779	0.2854	0.30654	0.28541	0.287	0.28282	0.28888	0.29253	0.31136	0.3495	0.34992	0.36406
471	0.41	0.41306	0.42271	0.41023	0.40395	0.39614	0.42183	0.31268	0.27998	0.41977	0.38694	0.29423	0.24854	0.24009	0.25674	0.43031	0.4206	0.42277	0.35279	0.39399	0.29822	0.25927	0.24924	0.3784	0.39224	0.37605	0.23416	0.23052	0.22746	0.23719	0.18528	0.26972	0.40663	0.44678	0.3991	0.41938	0.41828	0.38129	0.23909	0.25909	0.23909	0.24099	0.23649	0.24168	0.24628	0.26187	0.29686	0.29678	0.31123
472	0.35574	0.35806	0.36709	0.35653	0.35089	0.34252	0.365	0.26349	0.23547	0.36313	0.33314	0.2464	0.20782	0.20058	0.21317	0.37352	0.36454	0.36628	0.30085	0.33941	0.24987	0.21502	0.20593	0.32394	0.33747	0.32177	0.19258	0.19002	0.18715	0.1963	0.15353	0.22347	0.35243	0.38939	0.34574	0.36446	0.36345	0.32668	0.19736	0.2154	0.19735	0.19932	0.19491	0.19918	0.20412	0.21654	0.24754	0.2471	0.26121
473	0.30351	0.30514	0.31347	0.30471	0.29972	0.29107	0.31038	0.21836	0.19523	0.30869	0.28174	0.20323	0.1721	0.16618	0.17507	0.31876	0.31054	0.31191	0.25195	0.28718	0.20604	0.17633	0.16856	0.27226	0.28515	0.2703	0.15747	0.15581	0.15333	0.16127	0.12822	0.18277	0.30023	0.33383	0.29439	0.31144	0.31052	0.27485	0.16173	0.17703	0.16172	0.16354	0.15957	0.16291	0.16761	0.17699	0.20308	0.20244	0.21543
474	0.25428	0.2553	0.2628	0.25574	0.25142	0.24288	0.25902	0.17887	0.16074	0.2575	0.23396	0.16626	0.14257	0.138	0.14375	0.26699	0.25962	0.26067	0.20756	0.23852	0.16833	0.1445	0.1383	0.22474	0.23652	0.22302	0.1297	0.12873	0.12675	0.13314	0.10924	0.14907	0.25109	0.28095	0.24612	0.26124	0.26044	0.22714	0.1332	0.14533	0.13319	0.13474	0.13145	0.13389	0.13794	0.14457	0.16514	0.16447	0.17558
475	0.2095	0.21002	0.21651	0.21104	0.20743	0.19952	0.21246	0.14635	0.13302	0.21112	0.19143	0.13655	0.11968	0.11634	0.11964	0.21966	0.21327	0.21407	0.16933	0.19506	0.13791	0.12003	0.11539	0.18307	0.19322	0.18164	0.10912	0.10863	0.10714	0.11198	0.09572	0.12301	0.20651	0.23209	0.20246	0.21533	0.21467	0.18524	0.11181	0.12083	0.1118	0.11302	0.11046	0.11215	0.11539	0.11974	0.13487	0.13426	0.14307
476	0.17083	0.17098	0.17627	0.17227	0.16943	0.1626	0.17239	0.1213	0.11213	0.17126	0.15577	0.11419	0.10293	0.10063	0.10219	0.17848	0.17324	0.17383	0.13849	0.15845	0.11497	0.10232	0.099009	0.14874	0.1569	0.14763	0.094648	0.094485	0.093406	0.096933	0.086461	0.10409	0.16818	0.18894	0.16509	0.1754	0.1749	0.15061	0.096634	0.10302	0.096625	0.097553	0.095644	0.096745	0.099228	0.10185	0.11231	0.11182	0.11833
477	0.13954	0.13945	0.14348	0.14075	0.13866	0.13321	0.14012	0.10315	0.09724	0.13922	0.12784	0.098289	0.091231	0.089727	0.090117	0.14489	0.14087	0.14129	0.11524	0.12968	0.098647	0.090086	0.087804	0.12237	0.12846	0.12155	0.084863	0.08491	0.084139	0.086669	0.080357	0.091022	0.13736	0.15311	0.13515	0.14286	0.14251	0.1239	0.086305	0.090691	0.086297	0.086993	0.08559	0.086271	0.088145	0.089548	0.096434	0.096065	0.10063
478	0.11588	0.11568	0.11855	0.11684	0.1154	0.11133	0.11587	0.090604	0.087057	0.11519	0.10737	0.087436	0.083363	0.082441	0.082063	0.11935	0.11646	0.11674	0.098708	0.10853	0.087513	0.081932	0.080393	0.10336	0.10763	0.10279	0.078466	0.078653	0.078102	0.079911	0.076543	0.082308	0.11421	0.12537	0.11275	0.11813	0.11791	0.10456	0.07951	0.082447	0.079503	0.08003	0.078998	0.079383	0.080808	0.081379	0.085713	0.085441	0.088554
479	0.099047	0.098799	0.10072	0.099758	0.098832	0.095946	0.098712	0.082233	0.080339	0.098225	0.093148	0.080274	0.078284	0.077784	0.076892	0.10111	0.099146	0.099331	0.087457	0.093811	0.080168	0.076696	0.075689	0.090306	0.093181	0.089929	0.074485	0.074766	0.074375	0.075664	0.074395	0.076697	0.097835	0.10527	0.096935	0.10046	0.10034	0.091232	0.07524	0.077141	0.075234	0.075638	0.074877	0.07505	0.076152	0.076149	0.078701	0.0785	0.080575
480	0.087583	0.087329	0.088562	0.088104	0.08755	0.085554	0.087091	0.076847	0.076112	0.086749	0.083627	0.075745	0.075223	0.075028	0.073783	0.08868	0.087401	0.087514	0.080049	0.083953	0.075518	0.073544	0.07292	0.081649	0.083518	0.081407	0.072238	0.072585	0.07231	0.073223	0.073461	0.073288	0.086732	0.091436	0.086227	0.088416	0.088355	0.082363	0.072783	0.073935	0.072778	0.073093	0.072529	0.072551	0.073418	0.073011	0.074306	0.074156	0.075498
481	0.080034	0.079788	0.080535	0.080418	0.080121	0.078764	0.079467	0.073592	0.073679	0.07923	0.077462	0.073105	0.073628	0.073656	0.072166	0.080484	0.079685	0.079749	0.075365	0.077559	0.072794	0.071898	0.071552	0.0761	0.077262	0.075952	0.071248	0.071641	0.07145	0.072089	0.073411	0.071463	0.079449	0.082247	0.079215	0.08047	0.080454	0.076659	0.071639	0.072248	0.071634	0.071884	0.071465	0.071377	0.072074	0.071381	0.071774	0.071663	0.072478
482	0.075259	0.075022	0.07543	0.075543	0.075427	0.074524	0.074652	0.071873	0.072548	0.07449	0.073668	0.07183	0.0731	0.073291	0.071631	0.075267	0.074805	0.074835	0.072624	0.073606	0.071462	0.071343	0.071198	0.072748	0.073408	0.072666	0.071167	0.071593	0.071462	0.071905	0.074002	0.070783	0.074865	0.076338	0.074818	0.075422	0.075436	0.073194	0.071446	0.071661	0.071442	0.071645	0.071331	0.071164	0.071738	0.070841	0.070586	0.070504	0.070938
483	0.072456	0.072227	0.072394	0.072669	0.072679	0.072104	0.071828	0.071265	0.072363	0.071719	0.071571	0.071543	0.073347	0.073656	0.071877	0.072156	0.071933	0.071939	0.071283	0.071396	0.071136	0.071576	0.071577	0.07097	0.07127	0.070936	0.071741	0.072191	0.072103	0.072404	0.075056	0.07093	0.0722	0.072738	0.072285	0.072427	0.072463	0.071334	0.07194	0.071871	0.071936	0.072105	0.071868	0.071643	0.07213	0.071087	0.070369	0.070307	0.070467
484	0.071073	0.070853	0.070847	0.071234	0.071336	0.070997	0.070434	0.071462	0.072861	0.070365	0.070699	0.071969	0.074154	0.074549	0.072687	0.070557	0.070505	0.070494	0.070954	0.070445	0.071537	0.072377	0.072482	0.070329	0.070369	0.070329	0.072786	0.073254	0.073196	0.073397	0.076443	0.071671	0.070918	0.070787	0.071098	0.070909	0.07096	0.070633	0.072927	0.072656	0.072923	0.07307	0.072886	0.07262	0.073046	0.071899	0.070851	0.070803	0.070767
485	0.070715	0.070501	0.070371	0.070839	0.071005	0.070837	0.070071	0.072235	0.07385	0.07003	0.070709	0.072906	0.075363	0.075821	0.0739	0.070045	0.070117	0.070093	0.071353	0.070399	0.072457	0.073584	0.073764	0.070506	0.07036	0.070531	0.074168	0.074649	0.074613	0.074743	0.078071	0.072836	0.070634	0.070023	0.070881	0.070455	0.070516	0.070766	0.074268	0.073851	0.074265	0.074395	0.07425	0.073953	0.074337	0.073115	0.071832	0.071794	0.07162
486	0.071093	0.070885	0.070666	0.071191	0.071404	0.071358	0.070447	0.073421	0.075193	0.070427	0.071353	0.074208	0.076863	0.077367	0.075403	0.070316	0.070476	0.070444	0.072274	0.071003	0.07375	0.075083	0.075317	0.071269	0.070991	0.071312	0.07579	0.076283	0.07626	0.076342	0.079874	0.074306	0.071067	0.070113	0.071362	0.070766	0.070835	0.071496	0.075863	0.075342	0.075859	0.075979	0.07586	0.075541	0.075897	0.074619	0.073171	0.073139	0.072867
487	0.072	0.071796	0.071514	0.07208	0.072326	0.072367	0.071353	0.074903	0.076789	0.071348	0.07245	0.075772	0.078571	0.07911	0.077114	0.071147	0.07137	0.071331	0.073568	0.072072	0.075309	0.07679	0.077062	0.072451	0.072079	0.072507	0.077585	0.078088	0.078074	0.078124	0.081803	0.075992	0.072014	0.070815	0.072343	0.071627	0.0717	0.072653	0.077639	0.077045	0.077635	0.077749	0.077648	0.077312	0.077651	0.076331	0.074764	0.074735	0.074396
488	0.073286	0.073084	0.072758	0.073353	0.073623	0.073726	0.072637	0.076597	0.078568	0.072644	0.073872	0.077524	0.080431	0.080998	0.078974	0.072378	0.072648	0.072603	0.07513	0.073475	0.077059	0.078647	0.078947	0.073933	0.073494	0.073998	0.079504	0.080017	0.080009	0.080038	0.083826	0.077835	0.07333	0.071955	0.073682	0.07288	0.072957	0.074115	0.079546	0.0789	0.079543	0.079654	0.079563	0.079215	0.079545	0.07819	0.076539	0.076511	0.076127
489	0.07485	0.07465	0.074292	0.074909	0.075197	0.075342	0.074199	0.078447	0.080484	0.074215	0.075532	0.079413	0.082404	0.082993	0.080946	0.073904	0.074207	0.074157	0.076888	0.075122	0.07895	0.080617	0.080936	0.075634	0.07515	0.075707	0.081515	0.082038	0.082032	0.08205	0.085922	0.079792	0.074915	0.073417	0.075285	0.074423	0.074502	0.075801	0.081552	0.08087	0.081548	0.081659	0.081573	0.081215	0.081543	0.080159	0.078449	0.07842	0.078007
490	0.076601	0.076403	0.076022	0.076656	0.076956	0.077131	0.075948	0.080404	0.082493	0.075971	0.077354	0.081397	0.084457	0.085066	0.082994	0.075628	0.075955	0.075901	0.078779	0.076934	0.080937	0.082663	0.082996	0.077484	0.076968	0.077561	0.083591	0.084125	0.084119	0.084132	0.088072	0.081828	0.076684	0.075095	0.077066	0.07616	0.07624	0.077638	0.083625	0.082918	0.083621	0.083734	0.08365	0.083282	0.083615	0.082203	0.08045	0.080417	0.079988
491	0.078484	0.078286	0.077888	0.078537	0.078847	0.079042	0.077826	0.082435	0.084571	0.077855	0.079288	0.083448	0.08657	0.087196	0.085099	0.077489	0.077835	0.077777	0.080764	0.078861	0.082992	0.084765	0.085109	0.079437	0.078899	0.079518	0.085714	0.08626	0.086252	0.086266	0.090265	0.083921	0.07858	0.076924	0.078972	0.078034	0.078115	0.07958	0.085749	0.085024	0.085745	0.085861	0.085775	0.0854	0.08574	0.084301	0.082515	0.082478	0.082041
492	0.080466	0.080267	0.079857	0.080518	0.080836	0.081044	0.079801	0.084525	0.086705	0.079836	0.081307	0.085551	0.088732	0.089375	0.08725	0.079453	0.079815	0.079752	0.08282	0.080876	0.085101	0.086912	0.087264	0.081468	0.080915	0.081553	0.087875	0.088435	0.088423	0.088442	0.092497	0.086059	0.080573	0.078865	0.080972	0.08001	0.080091	0.081601	0.087914	0.087177	0.08791	0.088032	0.087941	0.087558	0.08791	0.086443	0.08463	0.084589	0.084149
493	0.082518	0.082319	0.081899	0.082573	0.082897	0.083113	0.081846	0.086658	0.088882	0.081885	0.083389	0.087694	0.090935	0.091594	0.089438	0.081491	0.081865	0.081797	0.084929	0.082953	0.08725	0.089096	0.089454	0.083556	0.082993	0.083643	0.090069	0.090644	0.090628	0.090655	0.094764	0.088232	0.082635	0.080886	0.083041	0.08206	0.08214	0.083679	0.090113	0.089368	0.090109	0.090238	0.09014	0.089749	0.090116	0.088618	0.086784	0.086736	0.0863
494	0.084624	0.084422	0.083994	0.084681	0.085012	0.085231	0.08394	0.088827	0.091095	0.083985	0.085516	0.089869	0.093172	0.09385	0.091657	0.083582	0.083966	0.083893	0.087078	0.085077	0.089433	0.091311	0.091673	0.085685	0.085117	0.085775	0.09229	0.092883	0.092861	0.0929	0.097065	0.090435	0.084749	0.082965	0.085161	0.084163	0.084243	0.0858	0.092343	0.091591	0.092339	0.092475	0.092369	0.091969	0.092355	0.090824	0.088969	0.088913	0.088484
495	0.086771	0.086566	0.086132	0.086833	0.087169	0.08739	0.086075	0.091026	0.093342	0.086124	0.087682	0.092074	0.095444	0.09614	0.093907	0.085715	0.08611	0.086031	0.089262	0.087239	0.091645	0.093554	0.093921	0.08785	0.087278	0.087943	0.094539	0.095152	0.095122	0.095175	0.099401	0.092666	0.086905	0.085089	0.087322	0.08631	0.08639	0.087955	0.094601	0.093845	0.094597	0.094743	0.094625	0.094216	0.094624	0.093056	0.091182	0.091117	0.090698
496	0.088957	0.088749	0.088308	0.089024	0.089367	0.089586	0.088245	0.093255	0.095623	0.088299	0.089883	0.094307	0.09775	0.098466	0.096187	0.087886	0.08829	0.088206	0.091478	0.089436	0.093887	0.095828	0.096199	0.090047	0.089473	0.090142	0.096816	0.097451	0.097412	0.097483	0.10177	0.094925	0.089099	0.087253	0.089522	0.088497	0.088576	0.090143	0.096889	0.09613	0.096885	0.097042	0.096912	0.096492	0.096926	0.095316	0.093423	0.093348	0.092942
497	0.091167	0.090955	0.090509	0.091242	0.091591	0.091806	0.090438	0.095508	0.097934	0.090497	0.092107	0.096564	0.10009	0.10083	0.098494	0.09008	0.090494	0.090403	0.093717	0.091657	0.096152	0.098128	0.098503	0.092266	0.091692	0.092364	0.099118	0.099778	0.09973	0.099821	0.10418	0.097208	0.091317	0.08944	0.091747	0.090708	0.090786	0.092353	0.099205	0.098444	0.0992	0.099369	0.099225	0.098795	0.099257	0.0976	0.095687	0.0956	0.09521
498	0.093405	0.093188	0.092735	0.093487	0.093843	0.094054	0.092654	0.097787	0.10028	0.092719	0.094358	0.098847	0.10246	0.10322	0.10083	0.092299	0.092724	0.092625	0.095984	0.093904	0.098445	0.10046	0.10084	0.09451	0.093936	0.094611	0.10145	0.10214	0.10208	0.10219	0.10663	0.099519	0.093563	0.091654	0.094	0.092947	0.093024	0.094586	0.10155	0.10079	0.10155	0.10173	0.10157	0.10113	0.10162	0.099913	0.097976	0.097877	0.097504
499	0.095665	0.095443	0.094983	0.095756	0.09612	0.096325	0.094891	0.10009	0.10265	0.094962	0.096633	0.10116	0.10487	0.10566	0.1032	0.094539	0.094976	0.094868	0.098274	0.096174	0.10076	0.10282	0.1032	0.096776	0.096202	0.09688	0.10381	0.10453	0.10446	0.1046	0.10913	0.10186	0.095833	0.093888	0.096278	0.095209	0.095285	0.096841	0.10393	0.10317	0.10393	0.10412	0.10394	0.10349	0.10402	0.10225	0.10029	0.10018	0.099826
500	0.097949	0.09772	0.097253	0.09805	0.098422	0.09862	0.097148	0.10242	0.10506	0.097225	0.098932	0.10349	0.10732	0.10814	0.10561	0.096799	0.097249	0.097131	0.10059	0.098467	0.10311	0.10521	0.1056	0.099065	0.098491	0.099172	0.10621	0.10696	0.10688	0.10704	0.11167	0.10423	0.098127	0.096142	0.098581	0.097493	0.097569	0.099118	0.10635	0.10558	0.10634	0.10656	0.10635	0.10588	0.10646	0.10462	0.10263	0.1025	0.10218
501	0.10026	0.10002	0.099549	0.10037	0.10075	0.10094	0.099429	0.10479	0.10752	0.099514	0.10126	0.10586	0.10981	0.11066	0.10805	0.099084	0.099548	0.09942	0.10294	0.10079	0.10549	0.10764	0.10803	0.10138	0.10081	0.10149	0.10864	0.10943	0.10933	0.10953	0.11427	0.10663	0.10045	0.098421	0.10091	0.099806	0.09988	0.10142	0.1088	0.10803	0.10879	0.10903	0.1088	0.10832	0.10893	0.10703	0.10501	0.10486	0.10456
502	0.1026	0.10235	0.10187	0.10272	0.10312	0.1033	0.10173	0.10719	0.11001	0.10183	0.10362	0.10827	0.11235	0.11324	0.11053	0.10139	0.10187	0.10173	0.10532	0.10314	0.10791	0.11012	0.11051	0.10372	0.10315	0.10384	0.11112	0.11195	0.11183	0.11207	0.11692	0.10907	0.1028	0.10072	0.10327	0.10215	0.10222	0.10375	0.1113	0.11053	0.11129	0.11155	0.1113	0.11079	0.11146	0.10947	0.10742	0.10725	0.10697
503	0.10497	0.10472	0.10422	0.10511	0.10551	0.10568	0.10407	0.10962	0.11255	0.10417	0.10601	0.11071	0.11494	0.11588	0.11307	0.10373	0.10423	0.10408	0.10773	0.10552	0.11037	0.11263	0.11304	0.1061	0.10553	0.10622	0.11364	0.11452	0.11438	0.11465	0.11964	0.11156	0.10518	0.10305	0.10567	0.10452	0.10459	0.10611	0.11384	0.11307	0.11384	0.11412	0.11384	0.11331	0.11403	0.11196	0.10987	0.10968	0.10943
504	0.10738	0.10711	0.10661	0.10753	0.10795	0.10811	0.10643	0.1121	0.11515	0.10654	0.10843	0.11319	0.11759	0.11857	0.11565	0.1061	0.10662	0.10645	0.11018	0.10794	0.11287	0.1152	0.11561	0.10851	0.10794	0.10864	0.11621	0.11714	0.11699	0.1173	0.12244	0.11409	0.1076	0.10541	0.10811	0.10693	0.107	0.10851	0.11644	0.11567	0.11643	0.11674	0.11643	0.11588	0.11666	0.11449	0.11236	0.11214	0.11193
505	0.10982	0.10955	0.10903	0.10999	0.11042	0.11057	0.10883	0.11462	0.11781	0.10895	0.1109	0.11572	0.12031	0.12134	0.11829	0.1085	0.10904	0.10886	0.11268	0.1104	0.11542	0.11782	0.11824	0.11096	0.11039	0.11109	0.11883	0.11982	0.11965	0.12001	0.12531	0.11667	0.11007	0.10781	0.11058	0.10937	0.10944	0.11094	0.1191	0.11832	0.11909	0.11943	0.11908	0.11851	0.11936	0.11708	0.11489	0.11466	0.11448
506	0.11231	0.11202	0.11149	0.1125	0.11295	0.11308	0.11126	0.1172	0.12053	0.1114	0.11341	0.1183	0.1231	0.12419	0.121	0.11095	0.11151	0.11131	0.11523	0.1129	0.11802	0.12051	0.12093	0.11345	0.11289	0.11359	0.12152	0.12257	0.12238	0.12279	0.12827	0.11931	0.11257	0.11024	0.1131	0.11186	0.11193	0.11341	0.12182	0.12104	0.12181	0.12218	0.1218	0.12119	0.12212	0.11972	0.11748	0.11722	0.11708
507	0.11485	0.11454	0.114	0.11506	0.11552	0.11564	0.11374	0.11983	0.12333	0.11389	0.11598	0.12095	0.12598	0.12713	0.12377	0.11343	0.11402	0.1138	0.11783	0.11545	0.12068	0.12327	0.12369	0.116	0.11543	0.11614	0.12428	0.12541	0.12518	0.12565	0.13134	0.12201	0.11513	0.11271	0.11568	0.1144	0.11446	0.11593	0.12462	0.12384	0.12461	0.12501	0.12459	0.12395	0.12496	0.12243	0.12013	0.11983	0.11975
508	0.11744	0.11712	0.11655	0.11767	0.11815	0.11825	0.11627	0.12252	0.1262	0.11643	0.1186	0.12365	0.12894	0.13016	0.12663	0.11597	0.11658	0.11634	0.12049	0.11805	0.12341	0.1261	0.12654	0.11859	0.11803	0.11874	0.12712	0.12832	0.12807	0.12861	0.13453	0.12479	0.11774	0.11523	0.11831	0.11699	0.11705	0.1185	0.1275	0.12672	0.12749	0.12793	0.12746	0.12679	0.12789	0.12521	0.12285	0.12251	0.12248
509	0.12008	0.11974	0.11916	0.12034	0.12085	0.12093	0.11884	0.12529	0.12917	0.11902	0.12128	0.12643	0.132	0.1333	0.12958	0.11855	0.11919	0.11893	0.12321	0.12072	0.12621	0.12901	0.12946	0.12124	0.12068	0.1214	0.13004	0.13133	0.13104	0.13165	0.13783	0.12764	0.1204	0.1178	0.121	0.11963	0.1197	0.12112	0.13047	0.12968	0.13046	0.13095	0.13042	0.12971	0.13092	0.12807	0.12563	0.12526	0.12528
510	0.12279	0.12243	0.12183	0.12307	0.1236	0.12366	0.12147	0.12812	0.13223	0.12166	0.12402	0.12927	0.13516	0.13655	0.13261	0.12118	0.12186	0.12158	0.126	0.12344	0.12909	0.13202	0.13248	0.12395	0.1234	0.12412	0.13305	0.13444	0.13411	0.1348	0.14127	0.13057	0.12313	0.12042	0.12376	0.12234	0.1224	0.1238	0.13353	0.13274	0.13352	0.13406	0.13347	0.13271	0.13404	0.13101	0.12849	0.12807	0.12815
511	0.12556	0.12518	0.12455	0.12587	0.12643	0.12647	0.12415	0.13103	0.13539	0.12436	0.12683	0.1322	0.13844	0.13993	0.13574	0.12388	0.12459	0.12428	0.12886	0.12624	0.13205	0.13512	0.13559	0.12673	0.12618	0.12691	0.13615	0.13765	0.13728	0.13807	0.14485	0.1336	0.12593	0.1231	0.12658	0.12511	0.12517	0.12655	0.1367	0.1359	0.13669	0.13727	0.13662	0.13582	0.13727	0.13403	0.13142	0.13096	0.13111
512	0.12841	0.12801	0.12736	0.12876	0.12935	0.12936	0.12691	0.13405	0.13869	0.12714	0.12973	0.13524	0.14188	0.14348	0.13901	0.12665	0.12741	0.12706	0.13183	0.12912	0.13512	0.13835	0.13884	0.1296	0.12904	0.12979	0.13939	0.14102	0.1406	0.14149	0.14865	0.13674	0.12882	0.12585	0.1295	0.12797	0.12803	0.12938	0.14001	0.1392	0.14	0.14064	0.13992	0.13906	0.14066	0.13718	0.13447	0.13396	0.13418
513	0.13135	0.13092	0.13024	0.13174	0.13236	0.13234	0.12974	0.13717	0.14213	0.13	0.13272	0.13837	0.14547	0.1472	0.14242	0.1295	0.1303	0.12992	0.13489	0.13208	0.1383	0.14171	0.14221	0.13255	0.132	0.13275	0.14276	0.14453	0.14406	0.14506	0.15264	0.14	0.1318	0.12867	0.13251	0.13091	0.13097	0.13229	0.14345	0.14264	0.14344	0.14416	0.14335	0.14243	0.14419	0.14045	0.13763	0.13705	0.13736
514	0.13438	0.13392	0.13321	0.13481	0.13547	0.13542	0.13265	0.1404	0.14571	0.13293	0.13581	0.14162	0.14922	0.1511	0.14596	0.13242	0.13328	0.13286	0.13805	0.13514	0.14159	0.1452	0.14572	0.13559	0.13504	0.1358	0.14627	0.14819	0.14766	0.14879	0.15685	0.14338	0.13486	0.13157	0.13562	0.13394	0.13399	0.13528	0.14705	0.14622	0.14703	0.14782	0.14692	0.14593	0.14788	0.14385	0.14089	0.14025	0.14066
515	0.13751	0.13701	0.13627	0.13799	0.13868	0.1386	0.13564	0.14375	0.14945	0.13595	0.13899	0.14499	0.15315	0.15519	0.14965	0.13543	0.13634	0.13589	0.14131	0.1383	0.14501	0.14884	0.14938	0.13872	0.13818	0.13895	0.14992	0.15202	0.15143	0.1527	0.16129	0.1469	0.13803	0.13456	0.13883	0.13707	0.13712	0.13837	0.15079	0.14995	0.15078	0.15166	0.15065	0.14958	0.15173	0.14737	0.14428	0.14356	0.14407
516	0.14075	0.14021	0.13943	0.14127	0.14202	0.14189	0.13873	0.14723	0.15337	0.13907	0.1423	0.1485	0.15729	0.15951	0.15353	0.13854	0.13951	0.13901	0.14471	0.14157	0.14857	0.15266	0.15322	0.14197	0.14143	0.14222	0.15376	0.15605	0.15538	0.15682	0.16602	0.15058	0.14131	0.13764	0.14216	0.14031	0.14035	0.14156	0.15473	0.15388	0.15471	0.15569	0.15457	0.15341	0.15579	0.15106	0.14781	0.14701	0.14764
517	0.14412	0.14354	0.14272	0.1447	0.1455	0.14532	0.14194	0.15088	0.15753	0.14231	0.14575	0.15218	0.1617	0.16413	0.15763	0.14177	0.14281	0.14226	0.14827	0.14499	0.15232	0.15669	0.15728	0.14536	0.14482	0.14562	0.15781	0.16033	0.15958	0.1612	0.17112	0.15445	0.14474	0.14083	0.14564	0.14368	0.14372	0.14488	0.15891	0.15803	0.15889	0.15998	0.15872	0.15746	0.1601	0.15495	0.15151	0.15062	0.15138
518	0.14763	0.147	0.14613	0.14828	0.14913	0.14891	0.14526	0.15471	0.16192	0.14568	0.14934	0.15604	0.16638	0.16906	0.16197	0.14512	0.14624	0.14563	0.15198	0.14854	0.15625	0.16094	0.16157	0.14888	0.14835	0.14917	0.1621	0.16487	0.16403	0.16585	0.1766	0.15853	0.1483	0.14414	0.14927	0.14719	0.14723	0.14834	0.16333	0.16243	0.16331	0.16452	0.16311	0.16173	0.16468	0.15905	0.15539	0.1544	0.15531
519	0.1513	0.15062	0.1497	0.15202	0.15294	0.15265	0.14872	0.15874	0.16659	0.14918	0.15311	0.1601	0.17139	0.17435	0.16658	0.1486	0.14981	0.14914	0.15588	0.15226	0.16039	0.16546	0.16613	0.15257	0.15204	0.15288	0.16665	0.16972	0.16877	0.17083	0.18255	0.16284	0.15204	0.14758	0.15308	0.15086	0.15089	0.15194	0.16804	0.16711	0.16801	0.16937	0.16779	0.16628	0.16956	0.16338	0.15949	0.15837	0.15945
520	0.15515	0.15442	0.15343	0.15596	0.15695	0.1566	0.15234	0.163	0.17161	0.15285	0.15707	0.16442	0.1768	0.18009	0.17153	0.15225	0.15356	0.15281	0.16	0.15617	0.1648	0.1703	0.17102	0.15645	0.15592	0.15678	0.17154	0.17495	0.17387	0.1762	0.18908	0.16744	0.15597	0.15118	0.15708	0.15472	0.15474	0.15573	0.17311	0.17214	0.17308	0.17459	0.17282	0.17115	0.17483	0.16801	0.16383	0.16259	0.16385
521	0.15921	0.15841	0.15735	0.16011	0.16118	0.16076	0.15613	0.16754	0.177	0.1567	0.16126	0.169	0.18266	0.18634	0.17684	0.15608	0.1575	0.15667	0.16436	0.1603	0.16948	0.1755	0.17626	0.16053	0.16001	0.1609	0.17679	0.18059	0.17937	0.18202	0.19628	0.17236	0.16011	0.15496	0.16132	0.15878	0.1588	0.15971	0.17856	0.17754	0.17853	0.18024	0.17824	0.17638	0.18052	0.17296	0.16846	0.16706	0.16854
522	0.16352	0.16263	0.1615	0.16452	0.16568	0.16518	0.16012	0.17239	0.18286	0.16076	0.1657	0.17393	0.18908	0.19322	0.18262	0.16011	0.16166	0.16074	0.16901	0.16468	0.17452	0.18113	0.18196	0.16486	0.16435	0.16526	0.1825	0.18677	0.18538	0.1884	0.20434	0.17767	0.1645	0.15893	0.16582	0.16308	0.16309	0.16393	0.18451	0.18343	0.18448	0.1864	0.18414	0.18207	0.18674	0.17832	0.17342	0.17184	0.17357
523	0.16809	0.16711	0.16589	0.16921	0.17048	0.16988	0.16434	0.1776	0.18925	0.16505	0.17044	0.17923	0.19614	0.20084	0.18893	0.16438	0.16607	0.16505	0.17398	0.16933	0.17995	0.18726	0.18817	0.16947	0.16896	0.16991	0.18873	0.19355	0.19197	0.19542	0.21342	0.18343	0.16918	0.16312	0.17061	0.16765	0.16765	0.16841	0.19103	0.18985	0.19099	0.19317	0.19061	0.18827	0.19358	0.18412	0.17877	0.17699	0.17899
524	0.17298	0.1719	0.17057	0.17423	0.17564	0.17493	0.16883	0.18326	0.19631	0.16962	0.17552	0.18499	0.20403	0.2094	0.1959	0.16892	0.17078	0.16963	0.17935	0.17433	0.18587	0.19402	0.19504	0.17441	0.1739	0.1749	0.19564	0.20111	0.1993	0.20326	0.22385	0.18974	0.1742	0.16757	0.17577	0.17254	0.17253	0.1732	0.19826	0.19697	0.19821	0.20071	0.19778	0.19513	0.20118	0.1905	0.18458	0.18257	0.18489
525	0.17823	0.17703	0.17558	0.17965	0.18119	0.18036	0.17362	0.18943	0.20413	0.17451	0.181	0.1913	0.21287	0.21907	0.20364	0.17377	0.17582	0.17454	0.18517	0.1797	0.19235	0.20151	0.20265	0.17972	0.17921	0.18027	0.20331	0.20957	0.20749	0.21206	0.23588	0.1967	0.17959	0.17232	0.18133	0.17779	0.17777	0.17834	0.20632	0.20487	0.20627	0.20912	0.20577	0.20274	0.20969	0.19753	0.19094	0.18866	0.19134
526	0.18392	0.18257	0.18099	0.18551	0.18723	0.18626	0.17877	0.19622	0.21291	0.17977	0.18696	0.19826	0.22293	0.23014	0.21235	0.17898	0.18125	0.17981	0.19153	0.18553	0.19951	0.20991	0.21122	0.18549	0.18497	0.1861	0.21197	0.21919	0.21679	0.22207	0.25003	0.20445	0.18545	0.17742	0.18737	0.18346	0.18344	0.18391	0.21544	0.21377	0.21538	0.21867	0.21482	0.21132	0.21934	0.20539	0.19797	0.19536	0.19846
527	0.19012	0.18861	0.18686	0.19193	0.19385	0.19271	0.18433	0.20377	0.22289	0.18547	0.19349	0.20605	0.23453	0.24302	0.22228	0.18463	0.18716	0.18554	0.19856	0.1919	0.20753	0.21946	0.22098	0.1918	0.19126	0.19248	0.22187	0.23027	0.22748	0.23364	0.267	0.21321	0.19185	0.18292	0.194	0.18965	0.18962	0.18999	0.2259	0.22394	0.22582	0.22965	0.22519	0.22111	0.23044	0.21429	0.20583	0.20283	0.20642
528	0.19694	0.19523	0.19328	0.19899	0.20115	0.19983	0.19041	0.21225	0.23437	0.19169	0.2007	0.21486	0.24811	0.25821	0.23375	0.19078	0.19362	0.19179	0.20639	0.19893	0.21661	0.23046	0.23225	0.19876	0.1982	0.19953	0.23336	0.24324	0.23998	0.24719	0.28773	0.22323	0.1989	0.18891	0.20133	0.19645	0.19641	0.19668	0.23806	0.23569	0.23798	0.24246	0.23725	0.23244	0.24339	0.22449	0.21471	0.21126	0.21541
529	0.20451	0.20256	0.20037	0.20685	0.20931	0.20777	0.19709	0.22193	0.24779	0.19856	0.20877	0.22498	0.26429	0.27647	0.24725	0.19757	0.20077	0.19869	0.21523	0.20677	0.22704	0.24335	0.24552	0.20653	0.20593	0.20741	0.24696	0.25871	0.25486	0.26338	0.31364	0.23489	0.20675	0.19548	0.20951	0.204	0.20395	0.20414	0.25249	0.24951	0.25238	0.25767	0.25156	0.2458	0.25878	0.23639	0.22491	0.2209	0.22572
530	0.21301	0.21078	0.20829	0.2157	0.21851	0.21673	0.20452	0.23313	0.26372	0.20622	0.21789	0.23681	0.28392	0.29882	0.26342	0.20512	0.20876	0.20638	0.22535	0.21561	0.23923	0.25873	0.26142	0.21531	0.21464	0.21633	0.26336	0.27753	0.27296	0.2831	0.34675	0.24871	0.2156	0.20277	0.21877	0.21247	0.21241	0.21255	0.26991	0.26608	0.26979	0.27609	0.26886	0.26186	0.27742	0.25055	0.23682	0.23213	0.23772
531	0.22266	0.2201	0.21724	0.22577	0.22903	0.22695	0.21289	0.24632	0.28299	0.21486	0.22836	0.25091	0.30826	0.32674	0.2832	0.21362	0.2178	0.21507	0.23711	0.22572	0.25375	0.27749	0.2809	0.22538	0.22459	0.22657	0.28363	0.30095	0.29549	0.30765	0.38997	0.26544	0.2257	0.21094	0.22937	0.22208	0.22201	0.22217	0.29144	0.28635	0.29129	0.2989	0.29026	0.28163	0.30048	0.26775	0.251	0.24546	0.25196
532	0.2338	0.23081	0.22749	0.23741	0.24122	0.23882	0.22244	0.26216	0.30678	0.22475	0.24056	0.26809	0.33906	0.36232	0.30797	0.22332	0.22817	0.22501	0.25103	0.23745	0.27142	0.30089	0.30535	0.23712	0.23614	0.23852	0.30931	0.33082	0.32422	0.3389	0.44728	0.28618	0.23739	0.22022	0.24171	0.23315	0.23308	0.23336	0.31869	0.31172	0.31851	0.32778	0.31738	0.30654	0.32968	0.28916	0.26825	0.26165	0.26921
533	0.24684	0.24333	0.23943	0.25108	0.25559	0.25282	0.23352	0.28162	0.33679	0.23626	0.25504	0.28958	0.37894	0.40853	0.3398	0.23457	0.24028	0.23658	0.26788	0.25134	0.29349	0.33088	0.33687	0.25108	0.24981	0.25275	0.34278	0.36992	0.36189	0.37968	0.52345	0.31265	0.25118	0.23093	0.25631	0.24612	0.24605	0.24667	0.35411	0.34428	0.35388	0.36529	0.35269	0.33883	0.36757	0.31658	0.28982	0.28185	0.29063
534	0.26242	0.25825	0.25357	0.26744	0.27285	0.26968	0.24664	0.30616	0.37548	0.24994	0.27263	0.31723	0.43146	0.46925	0.38176	0.24788	0.25468	0.25032	0.28875	0.26811	0.32182	0.37037	0.37864	0.26808	0.26632	0.2701	0.38763	0.42227	0.41251	0.43398	0.62135	0.34742	0.26775	0.24351	0.27396	0.26159	0.26153	0.26285	0.40131	0.38711	0.40102	0.41513	0.39987	0.38187	0.41786	0.35276	0.31758	0.30785	0.318
535	0.28142	0.27642	0.2707	0.28741	0.29402	0.29044	0.2625	0.33794	0.4263	0.26654	0.29449	0.35384	0.50114	0.54862	0.43825	0.26395	0.2722	0.267	0.31534	0.28888	0.35927	0.42366	0.43532	0.28931	0.28678	0.29182	0.44907	0.49334	0.48162	0.50696	0.7348	0.39446	0.28814	0.25858	0.29578	0.28047	0.28045	0.28307	0.46539	0.44466	0.46502	0.48237	0.4641	0.44057	0.48553	0.40187	0.35449	0.34242	0.35403
536	0.30515	0.2991	0.29195	0.31239	0.3206	0.31664	0.28218	0.38024	0.49372	0.28726	0.32244	0.40357	0.59176	0.64806	0.51495	0.28386	0.29407	0.28778	0.35018	0.31531	0.41017	0.49658	0.51307	0.31664	0.31284	0.31983	0.53366	0.58866	0.5752	0.60327	0.84003	0.45955	0.31387	0.2771	0.32345	0.30407	0.30411	0.30913	0.55236	0.52259	0.55192	0.57253	0.55152	0.52133	0.57587	0.46989	0.40507	0.38994	0.40291
537	0.33558	0.32817	0.31903	0.34442	0.35481	0.35063	0.30734	0.43782	0.58199	0.31389	0.35922	0.47201	0.70103	0.75898	0.61643	0.30924	0.32219	0.31447	0.39708	0.34999	0.48045	0.5949	0.61725	0.35297	0.3471	0.35715	0.64564	0.70762	0.69389	0.72055	0.90474	0.54961	0.34727	0.30048	0.35952	0.33439	0.33457	0.3438	0.66505	0.62535	0.66456	0.68667	0.665	0.62912	0.68948	0.56369	0.47598	0.45689	0.47076
538	0.37566	0.36655	0.35456	0.38655	0.39992	0.39591	0.34056	0.51668	0.69049	0.34926	0.40896	0.56449	0.81122	0.8563	0.73799	0.34265	0.35949	0.34984	0.46138	0.39687	0.57621	0.71697	0.74341	0.40275	0.39354	0.40838	0.77532	0.83051	0.81973	0.8377	0.91737	0.66777	0.39185	0.33095	0.40777	0.37449	0.37489	0.39132	0.79147	0.74771	0.79103	0.80978	0.79227	0.75728	0.81085	0.68501	0.57481	0.55115	0.5649
539	0.42976	0.41858	0.40254	0.44324	0.46057	0.45751	0.38589	0.62118	0.80415	0.39776	0.47745	0.67986	0.8902	0.91076	0.85337	0.38806	0.41051	0.39825	0.54901	0.4618	0.69667	0.83976	0.86305	0.47238	0.45808	0.48008	0.88688	0.91722	0.9122	0.917	0.89354	0.79964	0.4527	0.37198	0.4735	0.42894	0.42971	0.45749	0.89541	0.86222	0.89517	0.90489	0.89651	0.87385	0.90373	0.8158	0.70281	0.67576	0.68796
540	0.50384	0.49037	0.46878	0.5203	0.54249	0.54158	0.44939	0.74469	0.89065	0.4659	0.57101	0.79911	0.91727	0.91597	0.92283	0.45148	0.48184	0.46609	0.66186	0.55196	0.82055	0.92072	0.93278	0.56897	0.54806	0.57928	0.93977	0.94238	0.94232	0.93777	0.85173	0.90381	0.53615	0.42891	0.56266	0.50405	0.50527	0.54837	0.94079	0.92882	0.94077	0.94122	0.94152	0.93616	0.93892	0.9124	0.83754	0.81263	0.82227
541	0.60374	0.58845	0.56038	0.62278	0.64931	0.65169	0.53889	0.85708	0.92484	0.56147	0.69052	0.88512	0.90217	0.88878	0.9332	0.54077	0.58099	0.56104	0.78605	0.67096	0.9059	0.93908	0.94011	0.69344	0.66735	0.70573	0.93395	0.92108	0.92327	0.91561	0.80143	0.94417	0.64628	0.50927	0.67699	0.60606	0.6076	0.66449	0.9313	0.93614	0.9314	0.92707	0.93157	0.93733	0.92496	0.94379	0.92915	0.91393	0.92134
542	0.72743	0.71247	0.68037	0.7464	0.77268	0.77761	0.65902	0.91944	0.9133	0.68702	0.81737	0.91511	0.86399	0.84509	0.90479	0.66093	0.70883	0.68578	0.88536	0.80414	0.9303	0.91378	0.90858	0.82447	0.8015	0.83543	0.89597	0.87701	0.87987	0.87207	0.74775	0.92998	0.77388	0.62013	0.80185	0.73281	0.73384	0.78919	0.89231	0.90581	0.89245	0.88651	0.89227	0.90271	0.88505	0.9244	0.95107	0.94639	0.95264
543	0.85005	0.83959	0.81283	0.86364	0.8808	0.88455	0.79589	0.92421	0.87606	0.82275	0.9097	0.89983	0.81492	0.79391	0.85796	0.7988	0.84194	0.82122	0.92803	0.9084	0.90947	0.86776	0.85944	0.91614	0.90706	0.92175	0.84385	0.82305	0.82588	0.81908	0.69331	0.8881	0.88446	0.75648	0.8995	0.85766	0.85697	0.88509	0.84027	0.85798	0.84043	0.83424	0.84	0.85213	0.83348	0.88026	0.92467	0.92589	0.93182
544	0.92769	0.92442	0.91345	0.93258	0.9359	0.9354	0.90446	0.89306	0.82671	0.92003	0.93966	0.86009	0.76128	0.73992	0.80316	0.90903	0.93085	0.91935	0.91901	0.94749	0.86604	0.81282	0.80292	0.94166	0.94697	0.94188	0.78595	0.76531	0.76775	0.76246	0.63933	0.83419	0.93872	0.88202	0.93845	0.93466	0.93217	0.92332	0.78296	0.80275	0.78311	0.77733	0.78247	0.79492	0.77722	0.8254	0.8765	0.88028	0.8864
545	0.94189	0.94388	0.94778	0.94049	0.93428	0.93018	0.94541	0.84491	0.77228	0.94768	0.92048	0.80882	0.70628	0.68545	0.74545	0.95073	0.95032	0.94821	0.88117	0.93148	0.81249	0.75458	0.74384	0.91843	0.93115	0.91581	0.72619	0.70664	0.70853	0.70498	0.58639	0.77551	0.9349	0.94688	0.92574	0.94645	0.9434	0.91117	0.72406	0.74495	0.7242	0.71911	0.72333	0.73548	0.7196	0.76639	0.81932	0.82406	0.83065
546	0.91345	0.91752	0.92858	0.90943	0.89925	0.89322	0.92903	0.78931	0.71621	0.9239	0.87683	0.7525	0.65144	0.63159	0.68717	0.93413	0.9224	0.92515	0.83002	0.88819	0.7548	0.69557	0.68436	0.87215	0.88779	0.86833	0.66633	0.64834	0.64958	0.64789	0.53468	0.71537	0.8981	0.94488	0.88557	0.91605	0.91321	0.87148	0.66521	0.6868	0.66534	0.66111	0.66422	0.67577	0.66215	0.7062	0.7588	0.76369	0.771
547	0.86529	0.8699	0.88357	0.86047	0.84897	0.84188	0.8847	0.73086	0.66017	0.87647	0.82239	0.69432	0.59749	0.57883	0.62938	0.88947	0.87336	0.87809	0.77314	0.83326	0.69583	0.63699	0.62548	0.81596	0.8327	0.81167	0.60719	0.59099	0.59153	0.59177	0.48418	0.65528	0.84656	0.90623	0.83306	0.86669	0.86417	0.819	0.60719	0.6293	0.6073	0.60402	0.6059	0.61671	0.60555	0.64617	0.69751	0.7021	0.71033
548	0.8087	0.81321	0.82763	0.80388	0.79224	0.78445	0.82859	0.67173	0.6049	0.81911	0.76361	0.63585	0.54468	0.5273	0.57257	0.83313	0.81552	0.82096	0.7142	0.77368	0.63692	0.57934	0.56763	0.75585	0.77292	0.75146	0.54912	0.53483	0.53464	0.53681	0.4348	0.59592	0.78885	0.85227	0.77544	0.80935	0.80712	0.76095	0.55031	0.57287	0.5504	0.54809	0.54869	0.5587	0.55007	0.58694	0.63656	0.64063	0.64992
549	0.74903	0.75315	0.76751	0.7446	0.73333	0.72497	0.76786	0.61296	0.55073	0.75802	0.70354	0.57786	0.49307	0.47696	0.51693	0.77233	0.75452	0.76003	0.65495	0.71278	0.57871	0.52285	0.51097	0.69466	0.71179	0.69032	0.49228	0.47989	0.47899	0.48305	0.38647	0.5376	0.72907	0.79226	0.71622	0.7492	0.7472	0.70087	0.49466	0.51765	0.49473	0.49339	0.4927	0.50189	0.49577	0.52879	0.57648	0.5799	0.59034
550	0.68863	0.69221	0.70615	0.68478	0.67411	0.66519	0.70565	0.55505	0.49772	0.69587	0.64354	0.52072	0.44259	0.4277	0.46246	0.71014	0.69274	0.69802	0.59619	0.65193	0.52148	0.46755	0.45555	0.63361	0.65069	0.62941	0.43673	0.4262	0.42463	0.43044	0.33926	0.48042	0.66901	0.73013	0.65693	0.68846	0.68663	0.64038	0.44027	0.46361	0.44032	0.43989	0.43797	0.44634	0.44261	0.47182	0.5175	0.52018	0.53184
551	0.62853	0.63149	0.64485	0.62536	0.61541	0.60592	0.64334	0.49818	0.44583	0.63382	0.5842	0.46462	0.39321	0.37946	0.40921	0.64794	0.63125	0.63611	0.53828	0.59176	0.46533	0.41349	0.40142	0.57324	0.59024	0.56922	0.38259	0.37381	0.37167	0.37902	0.29353	0.42448	0.60945	0.66765	0.59824	0.6281	0.62641	0.58025	0.38718	0.41076	0.38721	0.38761	0.38457	0.39214	0.3906	0.41612	0.4597	0.46165	0.47447
552	0.56929	0.5716	0.58431	0.56686	0.55765	0.54756	0.58169	0.44249	0.39502	0.57252	0.52582	0.40972	0.34499	0.33233	0.35731	0.58646	0.57059	0.57495	0.48138	0.53258	0.41038	0.36081	0.34879	0.51386	0.53078	0.51004	0.33021	0.32304	0.32045	0.32899	0.25002	0.36995	0.55082	0.60574	0.5405	0.56862	0.56705	0.5209	0.33564	0.35919	0.33566	0.33676	0.33278	0.33957	0.33991	0.36191	0.40322	0.40446	0.4183
553	0.51115	0.51277	0.52483	0.50945	0.50099	0.49029	0.52105	0.38813	0.34543	0.51226	0.46854	0.3563	0.29828	0.28672	0.30717	0.526	0.51101	0.51484	0.42562	0.47452	0.35686	0.30992	0.29816	0.45563	0.47246	0.45202	0.28022	0.27453	0.27167	0.28092	0.20986	0.31726	0.49326	0.54481	0.48384	0.51024	0.50876	0.46258	0.28622	0.30927	0.28622	0.28784	0.28321	0.2892	0.29103	0.30967	0.34835	0.34897	0.36354
554	0.45419	0.45512	0.46651	0.45319	0.44546	0.43417	0.46158	0.33542	0.29745	0.45319	0.41247	0.30488	0.2538	0.24343	0.25958	0.46672	0.45261	0.45592	0.37119	0.41769	0.30527	0.26164	0.25047	0.39872	0.41538	0.39532	0.23375	0.22939	0.22648	0.23582	0.17443	0.26726	0.43683	0.48499	0.42829	0.453	0.45161	0.40551	0.23991	0.26177	0.23991	0.24183	0.2369	0.24206	0.2449	0.26029	0.29573	0.29585	0.31067
555	0.39851	0.39878	0.40949	0.39814	0.39113	0.37936	0.40348	0.28502	0.25189	0.39549	0.35782	0.25641	0.21271	0.20369	0.21582	0.40877	0.39554	0.39835	0.31852	0.3623	0.25655	0.21725	0.2071	0.34349	0.3598	0.34032	0.19229	0.1891	0.18637	0.19513	0.14492	0.22127	0.38167	0.42643	0.37399	0.39701	0.39571	0.35005	0.19815	0.21792	0.19814	0.20014	0.19532	0.19959	0.20291	0.21514	0.24647	0.24622	0.26063
556	0.3444	0.34407	0.35406	0.34458	0.33826	0.32622	0.34714	0.23803	0.21	0.3396	0.30516	0.21224	0.17643	0.16893	0.17742	0.35249	0.34017	0.34253	0.26848	0.30891	0.2121	0.17832	0.16962	0.29067	0.30631	0.28775	0.1573	0.15511	0.15277	0.16034	0.12182	0.18092	0.32816	0.36939	0.32135	0.34258	0.34139	0.29692	0.16245	0.17929	0.16244	0.1643	0.15998	0.16332	0.16663	0.17583	0.20212	0.20167	0.21487
557	0.29251	0.29167	0.30084	0.2931	0.28749	0.27556	0.29332	0.19595	0.1733	0.2863	0.2555	0.17393	0.14618	0.14028	0.14571	0.29856	0.28728	0.28923	0.2224	0.25852	0.17353	0.14618	0.1392	0.24145	0.25594	0.23884	0.12963	0.12825	0.12637	0.13246	0.10474	0.14763	0.27709	0.31446	0.27118	0.2904	0.28932	0.24727	0.13382	0.14723	0.13381	0.13538	0.13181	0.13428	0.13721	0.14368	0.16436	0.16384	0.1751
558	0.24394	0.24273	0.25091	0.2448	0.23995	0.22863	0.24324	0.16027	0.14302	0.23689	0.21033	0.14267	0.12249	0.11812	0.12117	0.24815	0.2381	0.23969	0.18192	0.21263	0.1421	0.12135	0.1161	0.19748	0.21022	0.19525	0.1091	0.10831	0.1069	0.11151	0.092708	0.12195	0.22975	0.26267	0.22479	0.24162	0.24069	0.20269	0.1123	0.12233	0.11229	0.11353	0.11075	0.11247	0.11487	0.11909	0.13428	0.13379	0.14269
559	0.20024	0.19885	0.20581	0.2012	0.19719	0.18709	0.19854	0.13192	0.11961	0.19307	0.17134	0.11878	0.10501	0.10194	0.10331	0.20288	0.19432	0.19558	0.14847	0.17296	0.11813	0.10329	0.099533	0.16038	0.17088	0.15859	0.094656	0.094276	0.093254	0.096607	0.084549	0.10336	0.18782	0.21553	0.18387	0.19787	0.19712	0.16482	0.096995	0.10413	0.096985	0.09793	0.095857	0.096997	0.098862	0.1014	0.11188	0.11148	0.11804
560	0.16304	0.16166	0.16724	0.16396	0.16084	0.15245	0.16088	0.1108	0.10256	0.15645	0.13982	0.10157	0.092718	0.090659	0.090911	0.16444	0.1576	0.15855	0.12265	0.14085	0.10091	0.090781	0.088178	0.13113	0.13918	0.12979	0.084884	0.084782	0.084051	0.086453	0.079238	0.090528	0.15285	0.1748	0.14991	0.16082	0.16026	0.1347	0.086562	0.091482	0.086554	0.087262	0.085742	0.086459	0.087896	0.089239	0.096127	0.095823	0.10042
561	0.13342	0.1322	0.13636	0.13422	0.13194	0.12548	0.13125	0.095887	0.090705	0.12789	0.11601	0.089706	0.0844	0.083091	0.082615	0.13395	0.12884	0.12952	0.10393	0.11659	0.089088	0.082421	0.08066	0.10957	0.11534	0.10863	0.078499	0.078585	0.078064	0.079778	0.075997	0.081988	0.12563	0.14185	0.12359	0.13152	0.13113	0.1123	0.079695	0.083002	0.079688	0.080222	0.07911	0.079527	0.080647	0.081176	0.085498	0.085272	0.088393
562	0.11138	0.11039	0.11329	0.11201	0.11047	0.10579	0.10946	0.085777	0.082768	0.10707	0.099083	0.081815	0.078992	0.078228	0.077271	0.11137	0.10779	0.10825	0.090999	0.099339	0.081245	0.077038	0.07588	0.09453	0.098454	0.093895	0.074528	0.074744	0.074373	0.075594	0.074263	0.076505	0.10579	0.11701	0.10447	0.10986	0.10962	0.096549	0.075375	0.077527	0.075369	0.075777	0.074962	0.075165	0.076058	0.076027	0.078557	0.078388	0.080459
563	0.09588	0.095113	0.097029	0.096361	0.095382	0.092139	0.094294	0.079151	0.077664	0.092665	0.087569	0.076766	0.075691	0.075322	0.074039	0.095573	0.093188	0.093487	0.082387	0.087617	0.07624	0.073781	0.073058	0.084436	0.087009	0.084023	0.072288	0.072596	0.072335	0.073197	0.073629	0.07319	0.092056	0.099389	0.091269	0.094727	0.094593	0.085911	0.072882	0.074199	0.072876	0.073194	0.072595	0.072644	0.073373	0.072948	0.074216	0.074089	0.075417
564	0.085423	0.084842	0.086046	0.085787	0.085209	0.083025	0.084142	0.075008	0.074596	0.083067	0.079996	0.073749	0.073918	0.073838	0.07233	0.084964	0.083438	0.083622	0.076851	0.079911	0.073261	0.072056	0.071649	0.077878	0.079499	0.077621	0.071302	0.071675	0.071493	0.072096	0.073795	0.071432	0.082896	0.08745	0.082474	0.084567	0.084504	0.078959	0.07171	0.07242	0.071705	0.071956	0.071516	0.071453	0.072064	0.07136	0.071723	0.071629	0.072425
565	0.0786	0.078157	0.078865	0.078878	0.078577	0.077144	0.077557	0.072645	0.073002	0.076871	0.075208	0.072199	0.073259	0.07339	0.071726	0.07806	0.077134	0.077238	0.0735	0.075033	0.071741	0.071442	0.071265	0.073809	0.074761	0.073662	0.071224	0.071643	0.071518	0.071934	0.07454	0.070799	0.076991	0.079617	0.076819	0.077964	0.077951	0.074609	0.071496	0.071766	0.071492	0.071695	0.071371	0.071227	0.071753	0.07085	0.070564	0.070493	0.070904
566	0.074342	0.074	0.074362	0.074559	0.074452	0.073552	0.073478	0.07157	0.072479	0.073067	0.072396	0.071713	0.07341	0.073694	0.071922	0.073757	0.073251	0.0733	0.071717	0.07216	0.071279	0.071633	0.071621	0.071516	0.071988	0.071447	0.071799	0.072252	0.072168	0.07245	0.075704	0.070981	0.073385	0.074665	0.073389	0.073867	0.073887	0.072113	0.071975	0.071926	0.071971	0.07214	0.0719	0.071696	0.072162	0.071118	0.070367	0.070313	0.070447
567	0.071911	0.071643	0.071758	0.072084	0.072114	0.071598	0.071181	0.071428	0.072733	0.070966	0.071006	0.071993	0.074145	0.074542	0.072695	0.071299	0.071094	0.071103	0.071068	0.070728	0.071579	0.072402	0.072509	0.070501	0.070628	0.070489	0.072844	0.073322	0.073266	0.073454	0.07717	0.071745	0.071423	0.071745	0.071552	0.071555	0.071598	0.070951	0.07295	0.072673	0.072946	0.073091	0.072911	0.072665	0.07309	0.071945	0.070863	0.07082	0.070757
568	0.070794	0.070581	0.070519	0.070935	0.071065	0.070826	0.070165	0.071957	0.073545	0.070093	0.070642	0.072825	0.075303	0.07578	0.073881	0.070167	0.070179	0.070159	0.071235	0.070335	0.072427	0.073585	0.073778	0.070409	0.070287	0.070438	0.074225	0.074722	0.074686	0.074808	0.078854	0.072928	0.070647	0.070281	0.070865	0.070526	0.070587	0.070751	0.074282	0.073841	0.074278	0.074407	0.074269	0.073992	0.07439	0.073171	0.071854	0.071819	0.071616
569	0.070628	0.070454	0.070265	0.070746	0.070946	0.070907	0.070072	0.072968	0.074759	0.070103	0.071017	0.074051	0.076764	0.077301	0.075364	0.069992	0.070159	0.070119	0.07199	0.07069	0.073667	0.075066	0.07532	0.070979	0.070679	0.071036	0.075847	0.076359	0.076336	0.076412	0.080696	0.074409	0.070726	0.069867	0.071008	0.070424	0.070496	0.071242	0.075869	0.075311	0.075866	0.075984	0.075876	0.075575	0.075956	0.074683	0.073199	0.073168	0.072867
570	0.071145	0.071	0.07072	0.071246	0.071497	0.071601	0.070643	0.074324	0.076263	0.070748	0.071922	0.07556	0.078444	0.079027	0.077059	0.070504	0.070783	0.070728	0.073165	0.071581	0.075188	0.07676	0.077059	0.072022	0.071597	0.072101	0.077641	0.078166	0.078152	0.078198	0.082655	0.076104	0.07142	0.070208	0.071746	0.070988	0.071069	0.072228	0.07764	0.076999	0.077637	0.077748	0.07766	0.077342	0.077714	0.076399	0.074797	0.074768	0.074399
571	0.072155	0.072031	0.071686	0.072245	0.072532	0.072737	0.071691	0.075928	0.077976	0.071849	0.073209	0.077273	0.080283	0.080901	0.078909	0.071511	0.07187	0.071803	0.074643	0.072858	0.076912	0.078609	0.078939	0.073407	0.072893	0.073501	0.07956	0.080097	0.080087	0.080114	0.084701	0.077953	0.072557	0.071095	0.072915	0.072033	0.07212	0.07357	0.079544	0.078844	0.079541	0.079649	0.079574	0.079243	0.079612	0.078263	0.076576	0.076548	0.076134
572	0.073515	0.073407	0.073016	0.073599	0.073912	0.074188	0.073079	0.07771	0.07984	0.073275	0.074766	0.079132	0.082239	0.082884	0.080871	0.07287	0.073286	0.073211	0.076336	0.074409	0.07878	0.080569	0.080922	0.075034	0.074457	0.075138	0.081569	0.082118	0.08211	0.082127	0.086812	0.079912	0.074009	0.072368	0.07439	0.07342	0.073511	0.075165	0.081545	0.080803	0.081541	0.081649	0.08158	0.081238	0.08161	0.080232	0.078486	0.078456	0.078013
573	0.075129	0.07503	0.074607	0.075209	0.07554	0.075865	0.07471	0.079621	0.081815	0.074934	0.07652	0.081095	0.084282	0.08495	0.082914	0.074482	0.074939	0.074857	0.078185	0.076159	0.080753	0.08261	0.082979	0.076835	0.076215	0.076947	0.083645	0.084206	0.084197	0.084211	0.088976	0.081952	0.075688	0.07392	0.076085	0.075054	0.075146	0.076941	0.083616	0.082845	0.083613	0.083723	0.083656	0.083305	0.083683	0.082279	0.080489	0.080456	0.079996
574	0.076911	0.07682	0.076373	0.076989	0.077334	0.077694	0.076503	0.081618	0.083866	0.076748	0.078404	0.083131	0.086386	0.087074	0.085015	0.076263	0.07675	0.076662	0.080138	0.07804	0.082798	0.084709	0.08509	0.078752	0.078102	0.078871	0.085767	0.086342	0.086331	0.086346	0.091182	0.084047	0.077519	0.075657	0.077928	0.076851	0.076945	0.078839	0.085739	0.084947	0.085735	0.085848	0.085781	0.085421	0.08581	0.084379	0.082556	0.082518	0.08205
575	0.078818	0.078731	0.078267	0.078896	0.079251	0.079635	0.078415	0.083681	0.085978	0.078675	0.080385	0.085221	0.08854	0.089248	0.087161	0.078166	0.078677	0.078583	0.08217	0.080019	0.084897	0.086852	0.087243	0.080755	0.080085	0.080879	0.087928	0.088517	0.088502	0.088523	0.093425	0.086186	0.079462	0.07753	0.079881	0.07877	0.078865	0.080826	0.087902	0.087095	0.087898	0.088017	0.087945	0.087578	0.08798	0.086521	0.084672	0.084628	0.084158
576	0.080817	0.080733	0.080256	0.080896	0.081261	0.08166	0.080414	0.085795	0.088138	0.080687	0.08244	0.087355	0.090737	0.091463	0.089346	0.080162	0.08069	0.080591	0.084261	0.082071	0.08704	0.089034	0.089431	0.082823	0.082139	0.082951	0.090121	0.090726	0.090707	0.090736	0.095703	0.088361	0.081489	0.079503	0.081916	0.080779	0.080874	0.08288	0.0901	0.089283	0.090096	0.090221	0.090144	0.089768	0.090188	0.088698	0.086826	0.086776	0.086309
577	0.082885	0.082802	0.082315	0.082967	0.083339	0.083748	0.082479	0.087948	0.090338	0.082762	0.084548	0.089525	0.09297	0.093716	0.091564	0.082224	0.082768	0.082663	0.086398	0.084179	0.089218	0.091247	0.09165	0.08494	0.084247	0.085071	0.092344	0.092967	0.092941	0.092983	0.098016	0.090567	0.083579	0.08155	0.084012	0.082856	0.082951	0.084985	0.092329	0.091504	0.092325	0.092459	0.092372	0.091988	0.092428	0.090904	0.089013	0.088955	0.088495
578	0.085006	0.084922	0.084428	0.085092	0.08547	0.085885	0.084593	0.090136	0.092574	0.084884	0.086701	0.091724	0.095238	0.096004	0.093812	0.084338	0.084894	0.084783	0.088572	0.086329	0.091428	0.09349	0.093898	0.087096	0.086397	0.08723	0.094593	0.095237	0.095203	0.09526	0.10036	0.0928	0.085718	0.083653	0.086157	0.084984	0.085078	0.087129	0.094588	0.093757	0.094583	0.094726	0.09463	0.094236	0.0947	0.093139	0.091228	0.091161	0.090711
579	0.087167	0.087082	0.08658	0.087259	0.087643	0.088059	0.086743	0.092353	0.094842	0.087042	0.088888	0.093952	0.09754	0.098327	0.096089	0.08649	0.087058	0.086941	0.090778	0.088514	0.093665	0.095762	0.096174	0.089283	0.08858	0.089419	0.09687	0.097536	0.097494	0.097568	0.10275	0.09506	0.087895	0.085796	0.08834	0.087151	0.087245	0.089305	0.096875	0.09604	0.09687	0.097024	0.096915	0.096511	0.097002	0.095399	0.093469	0.093392	0.092955
580	0.089357	0.089269	0.088761	0.089454	0.089845	0.090261	0.088919	0.094594	0.097141	0.089226	0.0911	0.096203	0.099873	0.10068	0.098395	0.088668	0.089247	0.089124	0.093009	0.090724	0.095926	0.09806	0.098477	0.091493	0.090788	0.091633	0.099172	0.099864	0.099813	0.099907	0.10517	0.097345	0.090099	0.087967	0.09055	0.089346	0.08944	0.091504	0.09919	0.098351	0.099185	0.099351	0.099228	0.098813	0.099334	0.097685	0.095733	0.095644	0.095223
581	0.091574	0.091483	0.090969	0.091679	0.092077	0.09249	0.09112	0.096861	0.099471	0.091435	0.09334	0.09848	0.10224	0.10308	0.10073	0.090873	0.091464	0.091333	0.095266	0.09296	0.098215	0.10039	0.10081	0.093729	0.093022	0.093871	0.1015	0.10222	0.10216	0.10228	0.10764	0.099657	0.092331	0.090166	0.092789	0.09157	0.091663	0.093728	0.10154	0.10069	0.10153	0.10171	0.10157	0.10114	0.1017	0.099998	0.098023	0.097921	0.097518
582	0.093813	0.093717	0.093196	0.093926	0.094331	0.094742	0.09334	0.099152	0.10183	0.093663	0.0956	0.10078	0.10464	0.10551	0.1031	0.093096	0.0937	0.09356	0.097546	0.095217	0.10053	0.10275	0.10317	0.095984	0.095276	0.09613	0.10387	0.10462	0.10454	0.10469	0.11015	0.102	0.094585	0.092383	0.095051	0.093814	0.093906	0.095971	0.10391	0.10307	0.10391	0.1041	0.10395	0.10351	0.1041	0.10234	0.10034	0.10022	0.099838
583	0.096078	0.095978	0.095449	0.0962	0.096614	0.09702	0.095583	0.10147	0.10423	0.095914	0.097888	0.10311	0.10709	0.10799	0.1055	0.095343	0.095961	0.095812	0.099855	0.097501	0.10287	0.10514	0.10557	0.098265	0.097557	0.098415	0.10626	0.10705	0.10696	0.10713	0.11271	0.10437	0.096866	0.094624	0.09734	0.096086	0.096177	0.098239	0.10633	0.10548	0.10632	0.10653	0.10636	0.1059	0.10653	0.10471	0.10268	0.10255	0.10219
584	0.098366	0.09826	0.097723	0.098499	0.098921	0.099323	0.097846	0.10382	0.10667	0.098187	0.1002	0.10548	0.10957	0.11051	0.10794	0.097611	0.098244	0.098085	0.10219	0.099809	0.10525	0.10757	0.108	0.10057	0.099861	0.10072	0.1087	0.10952	0.10942	0.10962	0.11533	0.10677	0.099171	0.096885	0.099656	0.098381	0.098471	0.10053	0.10878	0.10793	0.10877	0.10901	0.1088	0.10833	0.10901	0.10712	0.10506	0.10491	0.10457
585	0.10068	0.10057	0.10003	0.10083	0.10126	0.10166	0.10013	0.1062	0.10915	0.10049	0.10254	0.10787	0.11211	0.11308	0.11042	0.099906	0.10056	0.10039	0.10456	0.10215	0.10766	0.11004	0.11048	0.1029	0.1022	0.10306	0.11117	0.11204	0.11192	0.11216	0.11801	0.10922	0.10151	0.099172	0.102	0.1007	0.10079	0.10285	0.11128	0.11042	0.11127	0.11152	0.1113	0.11081	0.11154	0.10956	0.10747	0.1073	0.10699
586	0.10303	0.10291	0.10235	0.10319	0.10363	0.10402	0.10245	0.10862	0.11167	0.10281	0.10492	0.11031	0.1147	0.11571	0.11295	0.10223	0.10289	0.10271	0.10696	0.10452	0.11011	0.11255	0.113	0.10527	0.10456	0.10543	0.11369	0.11461	0.11447	0.11475	0.12075	0.11171	0.10387	0.10148	0.10438	0.10306	0.10315	0.1052	0.11382	0.11296	0.11381	0.11409	0.11384	0.11333	0.11412	0.11205	0.10992	0.10973	0.10945
587	0.10541	0.10528	0.10472	0.10558	0.10604	0.10642	0.10479	0.11108	0.11425	0.10517	0.10733	0.11278	0.11734	0.1184	0.11553	0.10458	0.10526	0.10507	0.1094	0.10692	0.11261	0.11512	0.11558	0.10767	0.10696	0.10784	0.11626	0.11723	0.11708	0.1174	0.12358	0.11424	0.10628	0.10383	0.1068	0.10545	0.10553	0.10758	0.11642	0.11556	0.11641	0.11671	0.11643	0.1159	0.11675	0.11459	0.11241	0.1122	0.11195
588	0.10783	0.10769	0.10711	0.10801	0.10848	0.10886	0.10717	0.11359	0.11688	0.10756	0.10978	0.11531	0.12005	0.12117	0.11817	0.10696	0.10767	0.10746	0.11189	0.10936	0.11515	0.11774	0.1182	0.11011	0.10939	0.11028	0.11889	0.11992	0.11974	0.12011	0.12648	0.11683	0.10872	0.1062	0.10925	0.10787	0.10796	0.11	0.11908	0.11821	0.11907	0.1194	0.11908	0.11852	0.11944	0.11718	0.11495	0.11471	0.1145
589	0.11028	0.11014	0.10954	0.11049	0.11098	0.11134	0.10958	0.11614	0.11959	0.10999	0.11228	0.11788	0.12284	0.12401	0.12088	0.10938	0.11012	0.10989	0.11442	0.11185	0.11775	0.12043	0.1209	0.11259	0.11187	0.11277	0.12158	0.12268	0.12247	0.1229	0.12949	0.11947	0.1112	0.10861	0.11175	0.11034	0.11042	0.11245	0.1218	0.12093	0.1218	0.12216	0.1218	0.12121	0.12222	0.11982	0.11754	0.11727	0.11711
590	0.11278	0.11263	0.11202	0.11301	0.11351	0.11387	0.11203	0.11875	0.12236	0.11245	0.11482	0.12052	0.12571	0.12695	0.12365	0.11184	0.11261	0.11236	0.117	0.11438	0.12041	0.12318	0.12366	0.11511	0.1144	0.1153	0.12435	0.12551	0.12528	0.12576	0.1326	0.12218	0.11373	0.11106	0.1143	0.11285	0.11293	0.11496	0.1246	0.12372	0.12459	0.12499	0.12459	0.12397	0.12506	0.12254	0.12019	0.11989	0.11977
591	0.11533	0.11516	0.11454	0.11558	0.1161	0.11644	0.11453	0.12142	0.1252	0.11497	0.11741	0.12321	0.12866	0.12997	0.1265	0.11435	0.11514	0.11487	0.11964	0.11696	0.12313	0.12601	0.1265	0.11769	0.11697	0.11788	0.12718	0.12843	0.12817	0.12872	0.13582	0.12496	0.11631	0.11355	0.1169	0.11541	0.11549	0.11751	0.12748	0.12659	0.12747	0.12791	0.12746	0.12681	0.12799	0.12532	0.12291	0.12257	0.1225
592	0.11793	0.11774	0.1171	0.1182	0.11874	0.11907	0.11706	0.12415	0.12813	0.11752	0.12006	0.12596	0.1317	0.13309	0.12943	0.1169	0.11772	0.11743	0.12234	0.1196	0.12591	0.12891	0.12942	0.12032	0.1196	0.12052	0.1301	0.13143	0.13114	0.13176	0.13917	0.12781	0.11894	0.11608	0.11956	0.11802	0.1181	0.1201	0.13044	0.12955	0.13043	0.13091	0.13041	0.12972	0.13101	0.12817	0.12569	0.12531	0.1253
593	0.12058	0.12038	0.11972	0.12088	0.12145	0.12176	0.11965	0.12695	0.13115	0.12013	0.12277	0.1288	0.13485	0.13634	0.13246	0.1195	0.12036	0.12004	0.12511	0.1223	0.12878	0.13191	0.13243	0.12301	0.12229	0.12322	0.13311	0.13454	0.13421	0.13491	0.14266	0.13075	0.12164	0.11867	0.12228	0.12068	0.12076	0.12276	0.1335	0.1326	0.13349	0.13402	0.13346	0.13273	0.13414	0.13111	0.12855	0.12813	0.12818
594	0.12331	0.12309	0.12241	0.12363	0.12423	0.12452	0.1223	0.12984	0.13429	0.12281	0.12556	0.13172	0.13813	0.13973	0.13561	0.12216	0.12306	0.12272	0.12796	0.12507	0.13174	0.13502	0.13556	0.12577	0.12505	0.12599	0.13623	0.13778	0.1374	0.1382	0.14634	0.13379	0.12441	0.12132	0.12508	0.12342	0.1235	0.12549	0.13668	0.13577	0.13667	0.13725	0.13663	0.13585	0.1374	0.13416	0.1315	0.13104	0.13115
595	0.1261	0.12586	0.12515	0.12646	0.12708	0.12736	0.12501	0.13281	0.13754	0.12555	0.12842	0.13473	0.14155	0.14326	0.13886	0.12489	0.12583	0.12546	0.13089	0.12791	0.1348	0.13824	0.13879	0.1286	0.12788	0.12884	0.13947	0.14115	0.14072	0.14162	0.15019	0.13694	0.12725	0.12402	0.12795	0.12623	0.12631	0.12828	0.13998	0.13906	0.13997	0.14062	0.13992	0.13908	0.14078	0.13731	0.13455	0.13403	0.13422
596	0.12897	0.12871	0.12797	0.12936	0.13002	0.13027	0.12779	0.13588	0.14091	0.12835	0.13137	0.13784	0.14511	0.14694	0.14225	0.12768	0.12867	0.12827	0.1339	0.13084	0.13795	0.14158	0.14215	0.13152	0.1308	0.13177	0.14283	0.14464	0.14417	0.14518	0.15424	0.14019	0.13017	0.12679	0.1309	0.12912	0.12919	0.13115	0.14341	0.14247	0.1434	0.14411	0.14333	0.14243	0.1443	0.14057	0.1377	0.13712	0.13739
597	0.13191	0.13163	0.13086	0.13235	0.13304	0.13327	0.13063	0.13904	0.14441	0.13123	0.13439	0.14105	0.14881	0.1508	0.14576	0.13054	0.13159	0.13115	0.13702	0.13385	0.14121	0.14505	0.14564	0.13451	0.13379	0.13478	0.14631	0.14829	0.14775	0.14889	0.1585	0.14357	0.13318	0.12963	0.13395	0.13208	0.13215	0.1341	0.14698	0.14602	0.14696	0.14775	0.14688	0.14591	0.14797	0.14395	0.14095	0.1403	0.14067
598	0.13496	0.13465	0.13385	0.13544	0.13616	0.13637	0.13356	0.14233	0.14809	0.1342	0.13753	0.1444	0.15272	0.15487	0.14945	0.1335	0.13461	0.13412	0.14025	0.13696	0.14462	0.14869	0.1493	0.13761	0.13689	0.1379	0.14997	0.15212	0.15152	0.15281	0.16305	0.1471	0.13629	0.13256	0.1371	0.13515	0.13522	0.13715	0.15073	0.14975	0.15071	0.15158	0.15062	0.14957	0.15183	0.14749	0.14434	0.14362	0.1441
599	0.13811	0.13777	0.13693	0.13863	0.13941	0.13959	0.13659	0.14576	0.15195	0.13727	0.14079	0.14788	0.15685	0.15919	0.15332	0.13655	0.13772	0.1372	0.14361	0.14019	0.14817	0.1525	0.15315	0.14083	0.1401	0.14113	0.15382	0.15617	0.15549	0.15695	0.16791	0.15079	0.13951	0.13558	0.14037	0.13832	0.13839	0.1403	0.15467	0.15367	0.15465	0.15562	0.15454	0.1534	0.15591	0.15119	0.14788	0.14708	0.14767
600	0.14137	0.141	0.14012	0.14195	0.14277	0.14292	0.13971	0.14933	0.156	0.14043	0.14416	0.15152	0.1612	0.16376	0.15739	0.1397	0.14095	0.14037	0.1471	0.14354	0.15188	0.15651	0.15718	0.14416	0.14343	0.14448	0.15786	0.16044	0.15967	0.16131	0.17311	0.15466	0.14285	0.13869	0.14377	0.14161	0.14168	0.14357	0.15883	0.1578	0.1588	0.15988	0.15867	0.15743	0.16021	0.15508	0.15158	0.15068	0.15141
601	0.14477	0.14436	0.14344	0.14541	0.14629	0.1464	0.14295	0.15308	0.1603	0.14373	0.14769	0.15535	0.16585	0.16866	0.16172	0.14297	0.1443	0.14367	0.15076	0.14703	0.15578	0.16075	0.16147	0.14763	0.1469	0.14798	0.16214	0.16499	0.16413	0.16598	0.17875	0.15876	0.14634	0.14193	0.14732	0.14504	0.1451	0.14697	0.16324	0.16218	0.16322	0.16442	0.16306	0.16171	0.1648	0.15918	0.15547	0.15447	0.15534
602	0.14831	0.14787	0.14689	0.14902	0.14996	0.15004	0.14632	0.15702	0.16487	0.14715	0.15138	0.15938	0.17083	0.17393	0.16631	0.14637	0.14779	0.1471	0.1546	0.15069	0.15991	0.16526	0.16602	0.15127	0.15053	0.15164	0.16671	0.16985	0.16888	0.17097	0.1849	0.16309	0.14999	0.14529	0.15103	0.14862	0.14868	0.15052	0.16795	0.16685	0.16792	0.16927	0.16775	0.16626	0.1697	0.16353	0.15958	0.15846	0.15949
603	0.15202	0.15153	0.15049	0.15281	0.15382	0.15385	0.14984	0.16118	0.16975	0.15073	0.15526	0.16364	0.17618	0.17963	0.17123	0.14992	0.15145	0.15069	0.15865	0.15452	0.16427	0.17008	0.17089	0.15507	0.15433	0.15547	0.17159	0.17508	0.17398	0.17636	0.19165	0.16771	0.15382	0.14879	0.15493	0.15237	0.15242	0.15423	0.173	0.17185	0.17297	0.17448	0.17276	0.17112	0.17497	0.16817	0.16393	0.16268	0.1639
604	0.15592	0.15538	0.15427	0.1568	0.15788	0.15786	0.15351	0.16559	0.175	0.15448	0.15935	0.16818	0.18199	0.18584	0.17653	0.15364	0.15529	0.15444	0.16293	0.15856	0.16893	0.17526	0.17614	0.15909	0.15834	0.15952	0.17685	0.18074	0.1795	0.1822	0.19913	0.17266	0.15785	0.15246	0.15905	0.15631	0.15636	0.15814	0.17846	0.17724	0.17842	0.18012	0.17819	0.17636	0.18069	0.17314	0.16857	0.16716	0.1686
605	0.16004	0.15943	0.15825	0.16101	0.16219	0.16211	0.15737	0.1703	0.18068	0.15842	0.16367	0.17303	0.18834	0.19266	0.18228	0.15755	0.15933	0.1584	0.16749	0.16283	0.17392	0.18087	0.18182	0.16333	0.16258	0.16381	0.18256	0.18693	0.18552	0.18859	0.20753	0.17799	0.16211	0.1563	0.16342	0.16047	0.16052	0.16227	0.18439	0.18309	0.18436	0.18627	0.18408	0.18204	0.18693	0.17851	0.17355	0.17196	0.17364
606	0.1644	0.16372	0.16246	0.16548	0.16676	0.16662	0.16144	0.17536	0.18686	0.16258	0.16828	0.17826	0.19533	0.20023	0.18856	0.16168	0.1636	0.16257	0.17236	0.16738	0.1793	0.18698	0.18802	0.16785	0.16708	0.16836	0.18881	0.19374	0.19213	0.19565	0.21704	0.18379	0.16664	0.16036	0.16806	0.16489	0.16493	0.16664	0.1909	0.18949	0.19086	0.19304	0.19055	0.18824	0.19379	0.18435	0.17892	0.17712	0.17908
607	0.16904	0.16828	0.16692	0.17025	0.17165	0.17143	0.16575	0.18081	0.19365	0.167	0.17321	0.18393	0.20309	0.20868	0.19547	0.16605	0.16815	0.167	0.1776	0.17223	0.18515	0.19369	0.19485	0.17267	0.17189	0.17323	0.1957	0.20129	0.19945	0.20349	0.22794	0.19013	0.17148	0.16465	0.17303	0.16959	0.16962	0.17131	0.1981	0.19654	0.19805	0.20053	0.19769	0.19507	0.20141	0.19073	0.18474	0.18271	0.18498
608	0.174	0.17316	0.17168	0.17536	0.1769	0.17659	0.17033	0.18673	0.20115	0.1717	0.17851	0.19012	0.2118	0.21823	0.20315	0.17071	0.173	0.17173	0.18326	0.17744	0.19155	0.20114	0.20243	0.17785	0.17705	0.17847	0.20337	0.20977	0.20765	0.21231	0.24061	0.19712	0.17667	0.16921	0.17838	0.17463	0.17465	0.17631	0.20613	0.20438	0.20607	0.20891	0.20566	0.20267	0.20994	0.19779	0.19113	0.18882	0.19145
609	0.17935	0.1784	0.17679	0.18088	0.18257	0.18217	0.17524	0.19323	0.20954	0.17675	0.18425	0.19695	0.22169	0.22916	0.21178	0.1757	0.17822	0.1768	0.18945	0.18309	0.19862	0.20948	0.21096	0.18346	0.18263	0.18415	0.21202	0.2194	0.21696	0.22236	0.25561	0.20494	0.18229	0.17408	0.18417	0.18006	0.18008	0.18171	0.21521	0.21322	0.21515	0.21842	0.21468	0.21123	0.21962	0.20569	0.19818	0.19555	0.1986
610	0.18515	0.18408	0.18231	0.18688	0.18876	0.18825	0.18052	0.20043	0.21903	0.18221	0.19052	0.20457	0.23308	0.24185	0.22162	0.18108	0.18388	0.18228	0.19625	0.18924	0.20651	0.21895	0.22067	0.18957	0.18871	0.19035	0.22192	0.2305	0.22766	0.23396	0.2737	0.21376	0.1884	0.17933	0.1905	0.18595	0.18597	0.18759	0.22562	0.22328	0.22555	0.22935	0.22501	0.22098	0.23077	0.21463	0.20608	0.20305	0.2066
611	0.19149	0.19027	0.18831	0.19344	0.19554	0.19491	0.18626	0.20848	0.22989	0.18814	0.19743	0.21317	0.24639	0.25681	0.23298	0.18693	0.19004	0.18824	0.20382	0.196	0.21545	0.22986	0.23189	0.19631	0.19539	0.19718	0.23341	0.24351	0.24018	0.24759	0.29597	0.22389	0.19512	0.18502	0.19747	0.1924	0.19241	0.19404	0.23773	0.23492	0.23765	0.2421	0.23705	0.23229	0.24379	0.22489	0.21502	0.21152	0.21564
612	0.19848	0.19709	0.19491	0.2007	0.20307	0.20229	0.19253	0.2176	0.2425	0.19465	0.20512	0.22302	0.26221	0.27475	0.24631	0.19334	0.19683	0.19479	0.21233	0.20351	0.22569	0.24263	0.24507	0.2038	0.20281	0.20479	0.247	0.25902	0.25509	0.26386	0.32399	0.23567	0.20256	0.19123	0.20523	0.19953	0.19953	0.2012	0.25207	0.2486	0.25197	0.25722	0.2513	0.2456	0.25926	0.23688	0.22529	0.22123	0.22601
613	0.20626	0.20466	0.20221	0.2088	0.21149	0.21056	0.19947	0.22808	0.25737	0.20187	0.21378	0.2345	0.28135	0.29667	0.26226	0.20043	0.20437	0.20205	0.22203	0.21194	0.23763	0.25785	0.26085	0.21224	0.21113	0.21337	0.26338	0.27788	0.27321	0.28367	0.35999	0.24966	0.2109	0.19808	0.21395	0.20747	0.20747	0.20924	0.26938	0.26496	0.26926	0.27552	0.26852	0.2616	0.27801	0.25114	0.23729	0.23253	0.2381
614	0.21502	0.21318	0.2104	0.21794	0.22102	0.21992	0.20722	0.24032	0.27522	0.20997	0.22365	0.24812	0.305	0.32398	0.28174	0.20836	0.21285	0.2102	0.23326	0.22154	0.25182	0.27637	0.28016	0.22187	0.2206	0.22317	0.28361	0.30136	0.29575	0.30835	0.40725	0.26663	0.22036	0.20572	0.22387	0.21643	0.21643	0.2184	0.29075	0.28494	0.2906	0.29814	0.28979	0.28126	0.30122	0.26849	0.25159	0.24598	0.25246
615	0.22502	0.22288	0.21969	0.2284	0.23197	0.23068	0.21598	0.25489	0.29708	0.21917	0.23509	0.26466	0.33488	0.35874	0.30611	0.21736	0.22252	0.21947	0.24648	0.23263	0.26905	0.29946	0.30438	0.23304	0.23153	0.23457	0.30925	0.33131	0.32452	0.33981	0.47006	0.28773	0.23125	0.21433	0.23535	0.22669	0.22669	0.22901	0.31778	0.30992	0.31759	0.32679	0.31676	0.30603	0.33065	0.29013	0.26905	0.26234	0.26991
616	0.23661	0.2341	0.23038	0.24054	0.24473	0.24324	0.22606	0.27261	0.3244	0.2298	0.24858	0.28525	0.37345	0.40379	0.33735	0.2277	0.23372	0.23017	0.26239	0.24566	0.29051	0.329	0.33557	0.24625	0.24439	0.24807	0.34264	0.37051	0.36223	0.38087	0.5529	0.31472	0.24399	0.22418	0.24884	0.2386	0.23862	0.24153	0.35286	0.34193	0.35263	0.36394	0.35183	0.33812	0.36888	0.31789	0.29091	0.28281	0.29163
617	0.25026	0.2473	0.24291	0.25489	0.25987	0.25818	0.23784	0.29469	0.35932	0.24231	0.26482	0.31163	0.42417	0.46294	0.37847	0.23981	0.24693	0.24277	0.28199	0.2613	0.31798	0.36784	0.37685	0.26223	0.25982	0.26444	0.38738	0.42302	0.41288	0.43558	0.65647	0.35029	0.25918	0.23564	0.26502	0.2527	0.25274	0.25666	0.39958	0.384	0.39929	0.41328	0.39866	0.38086	0.41967	0.35459	0.31915	0.30922	0.31947
618	0.26666	0.26315	0.25786	0.27216	0.27818	0.27632	0.2519	0.32294	0.40483	0.25734	0.28485	0.34637	0.49144	0.54035	0.43374	0.25428	0.26284	0.25791	0.30678	0.28051	0.35418	0.42016	0.43278	0.28205	0.27878	0.28478	0.4486	0.49423	0.48197	0.5091	0.76979	0.39851	0.2777	0.24925	0.28484	0.26971	0.26981	0.27543	0.46292	0.44043	0.46256	0.47978	0.46233	0.43907	0.48802	0.40447	0.35676	0.34442	0.35623
619	0.28681	0.28262	0.27612	0.29343	0.30081	0.29889	0.2691	0.36009	0.46503	0.27586	0.31022	0.3934	0.57933	0.63795	0.50879	0.27199	0.2825	0.27658	0.33904	0.30475	0.40324	0.49173	0.50948	0.30737	0.30275	0.31083	0.53285	0.58968	0.57547	0.60602	0.86416	0.46531	0.30086	0.26576	0.30975	0.29076	0.29096	0.29942	0.54893	0.51687	0.54849	0.56898	0.54901	0.51913	0.57923	0.47364	0.40849	0.39296	0.40629
620	0.31221	0.30717	0.29899	0.32026	0.3295	0.32772	0.29072	0.4102	0.54449	0.29935	0.3433	0.45807	0.68676	0.74849	0.60845	0.29427	0.30747	0.30025	0.38223	0.33629	0.47096	0.58842	0.61245	0.34079	0.33399	0.34529	0.6444	0.70864	0.69398	0.72367	0.91138	0.5576	0.33063	0.28633	0.34193	0.3175	0.31786	0.33111	0.66065	0.61803	0.66016	0.68227	0.66172	0.62609	0.69359	0.56894	0.48114	0.4615	0.47598
621	0.3451	0.33902	0.32848	0.35501	0.36678	0.36557	0.31876	0.47881	0.64539	0.33014	0.38769	0.54596	0.79826	0.84831	0.7291	0.32318	0.34021	0.33125	0.44128	0.37863	0.56358	0.70935	0.73789	0.38629	0.37602	0.39233	0.77376	0.83116	0.81949	0.84031	0.9103	0.67769	0.37001	0.31278	0.38467	0.35248	0.35312	0.37425	0.78688	0.73965	0.78643	0.80538	0.78878	0.75375	0.81479	0.69158	0.58229	0.55794	0.57266
622	0.38887	0.38157	0.36764	0.40119	0.41643	0.41657	0.35637	0.57167	0.75974	0.37184	0.44862	0.65778	0.88235	0.90724	0.84615	0.36197	0.38453	0.37322	0.5222	0.43701	0.68171	0.83306	0.85846	0.44976	0.43419	0.45805	0.88531	0.91691	0.91138	0.91788	0.87974	0.80925	0.42348	0.3479	0.44271	0.39958	0.40065	0.43414	0.89203	0.85581	0.89178	0.9018	0.89383	0.87083	0.90586	0.8222	0.71242	0.68474	0.69826
623	0.44853	0.43991	0.4212	0.46389	0.48371	0.48643	0.40848	0.68853	0.8607	0.43004	0.53259	0.77804	0.91559	0.91663	0.91931	0.4157	0.44623	0.4317	0.62862	0.5185	0.80651	0.91688	0.93034	0.53845	0.51567	0.54971	0.93848	0.94151	0.94131	0.93725	0.83479	0.90896	0.49708	0.39614	0.52208	0.46448	0.46617	0.5168	0.93937	0.92577	0.93933	0.94007	0.94024	0.93433	0.93891	0.91573	0.84623	0.82128	0.8322
624	0.53058	0.52083	0.49579	0.54937	0.57445	0.58118	0.48219	0.81033	0.91629	0.5123	0.64358	0.87174	0.90462	0.89181	0.93316	0.49165	0.53293	0.51422	0.75208	0.62888	0.89738	0.93836	0.9398	0.65608	0.62641	0.67004	0.93323	0.92014	0.92244	0.91442	0.78328	0.94412	0.59662	0.46417	0.6272	0.55411	0.55645	0.62492	0.93146	0.93613	0.93155	0.92739	0.93152	0.93679	0.92375	0.94376	0.93329	0.91862	0.92669
625	0.63998	0.62995	0.59846	0.6613	0.69002	0.70072	0.58522	0.8978	0.92064	0.62504	0.77166	0.91144	0.86852	0.84922	0.90663	0.59751	0.65002	0.62708	0.86158	0.76122	0.92815	0.91486	0.90943	0.78892	0.75954	0.8025	0.89563	0.87608	0.87919	0.87058	0.7294	0.92699	0.72011	0.56022	0.75163	0.67199	0.67439	0.74831	0.89326	0.90739	0.8934	0.88755	0.89287	0.90292	0.88326	0.9225	0.95068	0.94657	0.95274
626	0.76935	0.76092	0.72808	0.7892	0.81469	0.82524	0.71699	0.92626	0.89168	0.76118	0.88147	0.90277	0.8204	0.79851	0.86067	0.73171	0.78676	0.76317	0.92035	0.88031	0.91131	0.86969	0.86084	0.89562	0.87947	0.90377	0.84374	0.82217	0.82532	0.81749	0.67523	0.88385	0.84363	0.68774	0.86577	0.80434	0.80533	0.8559	0.84161	0.86028	0.84176	0.83564	0.84093	0.85272	0.83145	0.87753	0.92195	0.92354	0.92902
627	0.88415	0.8795	0.85724	0.89634	0.90922	0.91331	0.84949	0.90833	0.8462	0.88279	0.93448	0.8665	0.76715	0.74465	0.80626	0.86346	0.90103	0.88451	0.92331	0.94138	0.86992	0.81515	0.80458	0.93916	0.94089	0.94052	0.78597	0.76449	0.76729	0.76086	0.62176	0.82943	0.92415	0.82688	0.92989	0.90912	0.90759	0.9131	0.78447	0.80532	0.78462	0.77887	0.78357	0.79571	0.77512	0.82233	0.87277	0.87682	0.88232
628	0.94184	0.9411	0.93685	0.9445	0.94336	0.93966	0.9319	0.86637	0.79339	0.94293	0.9302	0.81698	0.71224	0.69015	0.7487	0.94089	0.94981	0.9442	0.8916	0.93988	0.81739	0.75708	0.74562	0.92667	0.93927	0.92396	0.72631	0.70589	0.70815	0.7034	0.56941	0.7706	0.94178	0.92682	0.93515	0.94944	0.94628	0.91548	0.72563	0.74761	0.72577	0.72072	0.72452	0.73638	0.7175	0.76319	0.81515	0.82011	0.82603
629	0.93878	0.94002	0.94825	0.9358	0.92702	0.9188	0.94458	0.81355	0.73785	0.93882	0.89353	0.76152	0.65739	0.6362	0.69046	0.94832	0.93817	0.93968	0.84338	0.90312	0.76021	0.69816	0.68619	0.88526	0.90227	0.8808	0.66651	0.64764	0.64926	0.64635	0.51831	0.71046	0.91562	0.95426	0.90361	0.9342	0.93081	0.88355	0.66681	0.68948	0.66694	0.66274	0.66545	0.67674	0.66007	0.70297	0.75447	0.75955	0.76617
630	0.9015	0.90327	0.91647	0.8964	0.88479	0.87452	0.91303	0.75619	0.68179	0.89983	0.84221	0.70375	0.60337	0.58333	0.63267	0.91388	0.89596	0.90049	0.78782	0.851	0.70151	0.63961	0.62734	0.83122	0.84993	0.82605	0.60743	0.59035	0.59127	0.59027	0.4684	0.65043	0.86872	0.9291	0.85491	0.89119	0.88806	0.83492	0.6088	0.63197	0.60891	0.60564	0.60715	0.61772	0.60351	0.64297	0.69314	0.69791	0.70545
631	0.84926	0.85098	0.86583	0.84357	0.83118	0.81993	0.86218	0.69736	0.62629	0.84603	0.78468	0.64546	0.5505	0.53171	0.57586	0.8617	0.84092	0.84662	0.72942	0.79252	0.64274	0.58199	0.5695	0.77198	0.79123	0.76661	0.54941	0.53424	0.53444	0.53535	0.41957	0.59116	0.81287	0.88048	0.79879	0.83637	0.83353	0.77871	0.55193	0.57554	0.55201	0.54972	0.54996	0.55975	0.54807	0.58379	0.63221	0.63644	0.64506
632	0.79092	0.79235	0.8075	0.78535	0.77307	0.76126	0.8034	0.63851	0.5718	0.7862	0.72497	0.58753	0.49883	0.4813	0.5202	0.80234	0.78081	0.7868	0.6703	0.73189	0.58461	0.52551	0.51286	0.71103	0.73036	0.7057	0.49262	0.47936	0.47884	0.48163	0.37179	0.53294	0.75361	0.82243	0.73995	0.77693	0.77435	0.71944	0.49629	0.52032	0.49636	0.49502	0.49399	0.50298	0.49381	0.52568	0.57217	0.57574	0.58552
633	0.73056	0.73156	0.74643	0.72543	0.71367	0.70143	0.74169	0.58032	0.51846	0.72434	0.66494	0.5304	0.44832	0.43199	0.46573	0.74047	0.71917	0.72501	0.6115	0.67099	0.52742	0.47024	0.45745	0.64996	0.66921	0.64476	0.43711	0.42571	0.42453	0.42906	0.32518	0.47587	0.69352	0.76083	0.68056	0.71616	0.71379	0.65927	0.4419	0.46631	0.44195	0.44153	0.43927	0.44747	0.44068	0.46876	0.51323	0.51607	0.52707
634	0.66993	0.67044	0.68475	0.66542	0.65435	0.64171	0.67925	0.52311	0.46625	0.66218	0.6054	0.47427	0.39891	0.3837	0.41248	0.67809	0.65747	0.66294	0.55347	0.61062	0.47131	0.41619	0.40333	0.58946	0.60858	0.58446	0.38302	0.37337	0.37161	0.37766	0.2802	0.42003	0.63369	0.69823	0.62158	0.65546	0.65325	0.59922	0.38882	0.41349	0.38885	0.38926	0.38587	0.3933	0.38871	0.41312	0.45549	0.45759	0.46976
635	0.60984	0.6098	0.62344	0.60604	0.59574	0.58268	0.61706	0.46701	0.41514	0.60048	0.54671	0.41929	0.35064	0.33652	0.36056	0.61609	0.59637	0.60136	0.49639	0.55113	0.41636	0.36352	0.3507	0.52985	0.54883	0.52508	0.33067	0.32265	0.32044	0.32769	0.23773	0.36563	0.57462	0.63581	0.5634	0.59544	0.59337	0.53976	0.33728	0.36194	0.33729	0.3384	0.33408	0.34075	0.33807	0.35899	0.39908	0.40047	0.41366
636	0.55072	0.5501	0.56304	0.54767	0.53816	0.52465	0.55571	0.41214	0.36517	0.53969	0.48906	0.36571	0.30383	0.29081	0.31036	0.555	0.53626	0.5407	0.4404	0.49272	0.36279	0.31261	0.30005	0.47134	0.49015	0.4668	0.28071	0.2742	0.27171	0.27969	0.19898	0.31312	0.51655	0.5742	0.50625	0.53643	0.53447	0.48121	0.28782	0.31201	0.28783	0.28946	0.28448	0.29038	0.28927	0.30687	0.34432	0.34509	0.35899
637	0.49274	0.49153	0.50377	0.49043	0.48169	0.46773	0.49544	0.35875	0.31659	0.48002	0.43255	0.31401	0.25912	0.24732	0.26264	0.49503	0.47728	0.48117	0.38565	0.43548	0.31107	0.26424	0.25228	0.41408	0.43268	0.40978	0.23425	0.22912	0.22655	0.2347	0.1653	0.26339	0.45959	0.51367	0.45019	0.47854	0.4767	0.4238	0.24144	0.26443	0.24144	0.24338	0.23811	0.2432	0.24327	0.25768	0.29188	0.29215	0.30628
638	0.43598	0.43418	0.44572	0.43436	0.42638	0.41201	0.43643	0.30731	0.27004	0.42162	0.37737	0.26503	0.21763	0.20724	0.21864	0.4363	0.41956	0.42291	0.33252	0.3796	0.26207	0.21966	0.20876	0.35837	0.3766	0.35432	0.19275	0.18889	0.18647	0.19414	0.13772	0.21779	0.40382	0.45434	0.39531	0.42186	0.42011	0.36784	0.19954	0.22041	0.19953	0.20155	0.19641	0.20064	0.20146	0.2128	0.2429	0.2428	0.25651
639	0.38057	0.37824	0.38905	0.37959	0.37233	0.35771	0.37893	0.25871	0.22658	0.36479	0.32392	0.22004	0.18074	0.17199	0.17988	0.37906	0.36335	0.3662	0.28172	0.3255	0.21713	0.18042	0.17104	0.30482	0.32239	0.30106	0.1577	0.15495	0.15286	0.15952	0.11648	0.17796	0.34952	0.39638	0.34189	0.36657	0.36493	0.31392	0.16362	0.18148	0.16361	0.16549	0.16089	0.16422	0.1654	0.17384	0.19897	0.19866	0.21116
640	0.32693	0.32415	0.33416	0.32647	0.31995	0.30536	0.32348	0.21429	0.18766	0.31014	0.27304	0.1806	0.14972	0.14276	0.14771	0.3238	0.30923	0.31163	0.23446	0.27402	0.17785	0.1479	0.14035	0.25449	0.27092	0.2511	0.12996	0.12813	0.12645	0.13182	0.10101	0.14527	0.29728	0.34022	0.29056	0.31317	0.31167	0.26303	0.13475	0.14903	0.13474	0.13633	0.13252	0.13499	0.13623	0.1421	0.16174	0.16134	0.17195
641	0.27583	0.27275	0.28184	0.27577	0.27002	0.25595	0.27102	0.1756	0.15469	0.25873	0.22606	0.14803	0.12524	0.12001	0.1227	0.27146	0.25825	0.26024	0.19233	0.22652	0.14557	0.12267	0.11696	0.20892	0.2236	0.20598	0.10936	0.10824	0.10698	0.11104	0.090214	0.1202	0.2482	0.28665	0.24246	0.26261	0.26127	0.21665	0.113	0.12372	0.11298	0.11425	0.11128	0.11302	0.11415	0.11791	0.13225	0.13187	0.1402
642	0.22855	0.2254	0.23337	0.22878	0.22386	0.21093	0.22298	0.14391	0.12851	0.21212	0.18465	0.12282	0.10704	0.10332	0.10443	0.22345	0.21193	0.21354	0.15689	0.18471	0.12076	0.10426	0.10017	0.16981	0.18213	0.16741	0.094855	0.094244	0.093328	0.096293	0.082965	0.10213	0.20385	0.23699	0.19915	0.21635	0.21521	0.17646	0.097503	0.10517	0.097494	0.098453	0.096243	0.097405	0.098365	0.10057	0.11041	0.11009	0.1162
643	0.18675	0.18378	0.1904	0.18712	0.18313	0.17198	0.18111	0.11961	0.10898	0.17203	0.15033	0.10448	0.094161	0.091632	0.091709	0.18153	0.17204	0.17329	0.12901	0.15012	0.10281	0.09148	0.088634	0.13838	0.14801	0.13655	0.08504	0.084779	0.084121	0.086253	0.078309	0.08971	0.1659	0.19294	0.16228	0.17611	0.17521	0.14378	0.086927	0.092229	0.086919	0.087637	0.086019	0.08676	0.08757	0.088691	0.09512	0.09487	0.099141
644	0.15195	0.14939	0.15454	0.15236	0.14933	0.14041	0.14685	0.10207	0.095153	0.13977	0.12379	0.091736	0.085402	0.083759	0.083173	0.14719	0.13987	0.14079	0.10848	0.12342	0.090424	0.082914	0.080982	0.11481	0.12183	0.1135	0.078621	0.078599	0.078127	0.079658	0.07554	0.081465	0.13554	0.15616	0.13295	0.1433	0.14265	0.11895	0.079953	0.083532	0.079946	0.080486	0.079305	0.079747	0.080442	0.080825	0.084834	0.084644	0.08754
645	0.12492	0.12289	0.12662	0.12531	0.12316	0.1165	0.12072	0.089966	0.085755	0.11557	0.10453	0.083199	0.079668	0.078671	0.077651	0.12095	0.11569	0.11633	0.094132	0.10412	0.082167	0.077379	0.076103	0.098147	0.10298	0.097255	0.074621	0.074766	0.074428	0.075528	0.074147	0.076186	0.11287	0.12753	0.11114	0.11837	0.11793	0.10119	0.075552	0.077895	0.075546	0.075959	0.075096	0.075322	0.075936	0.075811	0.078132	0.077988	0.079909
646	0.10526	0.10373	0.10627	0.10558	0.10416	0.099476	0.10202	0.081905	0.079593	0.098466	0.091252	0.077683	0.076125	0.075598	0.074286	0.10216	0.09859	0.099006	0.084485	0.090843	0.076862	0.074008	0.073206	0.086859	0.090053	0.086275	0.072359	0.072623	0.072382	0.073169	0.07376	0.073014	0.096887	0.1067	0.095813	0.10057	0.10029	0.089061	0.072998	0.074447	0.072993	0.073313	0.072682	0.072753	0.073309	0.072828	0.073958	0.073847	0.075077
647	0.091665	0.090567	0.0922	0.091931	0.091049	0.087876	0.089261	0.076735	0.07576	0.086903	0.082414	0.074326	0.074174	0.07399	0.072479	0.089335	0.087011	0.087271	0.078212	0.082024	0.073662	0.072199	0.071741	0.079455	0.08149	0.079087	0.071355	0.071705	0.071534	0.072094	0.074104	0.071359	0.086088	0.092326	0.085473	0.088435	0.088281	0.081042	0.071781	0.072578	0.071777	0.072028	0.071569	0.071527	0.072042	0.071308	0.071583	0.071498	0.072232
648	0.082609	0.08183	0.082828	0.082829	0.082325	0.080234	0.080839	0.073628	0.073607	0.079325	0.076728	0.072528	0.073383	0.073451	0.071803	0.080866	0.079419	0.079571	0.07433	0.07636	0.07198	0.071523	0.071316	0.074785	0.076007	0.074569	0.071263	0.071675	0.071554	0.071951	0.074978	0.070801	0.079024	0.082768	0.078724	0.08044	0.080367	0.075933	0.071534	0.071856	0.07153	0.071733	0.071399	0.071274	0.071761	0.070847	0.070508	0.070442	0.070817
649	0.076776	0.076225	0.076783	0.076962	0.076719	0.075392	0.075466	0.072013	0.072677	0.074543	0.073273	0.071859	0.073437	0.073688	0.071946	0.075461	0.074625	0.074702	0.072161	0.072923	0.071399	0.071668	0.071642	0.072057	0.072699	0.071949	0.071829	0.072285	0.0722	0.072481	0.076233	0.071035	0.074593	0.076606	0.074513	0.075358	0.075341	0.072889	0.071988	0.071967	0.071984	0.072152	0.071909	0.071724	0.072192	0.07115	0.070373	0.070319	0.070436
650	0.073218	0.072831	0.073078	0.073378	0.07332	0.072537	0.072241	0.071479	0.072635	0.07174	0.071416	0.072008	0.074102	0.074486	0.07268	0.072215	0.071812	0.071836	0.071232	0.071081	0.071614	0.072403	0.072508	0.070727	0.070951	0.070697	0.072867	0.073355	0.073296	0.073495	0.077765	0.071838	0.072037	0.072825	0.072111	0.072337	0.07236	0.071331	0.072945	0.072677	0.072942	0.073085	0.072907	0.072678	0.073135	0.072002	0.070912	0.070868	0.070801
651	0.071288	0.071021	0.071046	0.07143	0.071504	0.071115	0.070556	0.071727	0.073234	0.070359	0.070715	0.072745	0.075208	0.07569	0.073838	0.070514	0.070423	0.07041	0.071198	0.070393	0.0724	0.073562	0.073761	0.070407	0.07033	0.070434	0.074243	0.074756	0.074713	0.074855	0.079497	0.073048	0.070831	0.07074	0.071016	0.070797	0.070848	0.070845	0.074264	0.073819	0.074261	0.074387	0.074256	0.073995	0.074446	0.073247	0.071935	0.071896	0.071699
652	0.070538	0.070357	0.070222	0.070666	0.070834	0.070729	0.069984	0.072536	0.074296	0.070006	0.07085	0.073904	0.076632	0.077185	0.075301	0.069931	0.070065	0.070025	0.071809	0.070538	0.073596	0.075026	0.075292	0.070816	0.070523	0.070883	0.075861	0.076394	0.076362	0.076465	0.081374	0.074549	0.070602	0.069882	0.070867	0.070329	0.0704	0.071133	0.075843	0.07527	0.075839	0.075955	0.075856	0.075571	0.076021	0.074772	0.073303	0.073268	0.07298
653	0.070636	0.070518	0.070269	0.070755	0.070991	0.071089	0.070212	0.073748	0.07569	0.070392	0.071583	0.075365	0.078285	0.078892	0.076982	0.070151	0.070447	0.070387	0.072882	0.071279	0.075085	0.076708	0.077023	0.071744	0.071298	0.07184	0.077653	0.078201	0.078177	0.078255	0.083358	0.076258	0.071076	0.069906	0.071397	0.070632	0.070717	0.071974	0.077607	0.076944	0.077604	0.077713	0.077635	0.077333	0.077785	0.076498	0.074917	0.074884	0.074533
654	0.071342	0.07127	0.07094	0.071455	0.071739	0.071983	0.071012	0.075247	0.077321	0.071304	0.072743	0.077041	0.080104	0.080751	0.07882	0.070946	0.071357	0.071282	0.074283	0.072445	0.076784	0.078547	0.078896	0.073043	0.072489	0.07316	0.079569	0.080131	0.080111	0.080173	0.085422	0.078116	0.072052	0.07056	0.072413	0.071485	0.071581	0.073208	0.079505	0.078777	0.079502	0.079608	0.079544	0.079228	0.079686	0.078368	0.076708	0.076673	0.076281
655	0.072484	0.072444	0.072056	0.072592	0.072911	0.073257	0.072219	0.076952	0.079125	0.072592	0.074209	0.078871	0.082043	0.082723	0.080772	0.072151	0.072644	0.072559	0.07592	0.073915	0.078633	0.080498	0.080872	0.074607	0.073976	0.074739	0.081575	0.082151	0.082131	0.082186	0.087548	0.080081	0.073386	0.071665	0.073775	0.072733	0.072835	0.074725	0.0815	0.080726	0.081497	0.081602	0.081547	0.081219	0.081686	0.08034	0.078623	0.078587	0.078168
656	0.073936	0.073919	0.07349	0.074042	0.074386	0.074805	0.073717	0.078804	0.081054	0.074148	0.075892	0.080813	0.084072	0.084778	0.082807	0.073648	0.074201	0.074107	0.077725	0.075602	0.08059	0.082531	0.082924	0.07636	0.075675	0.076502	0.083647	0.084237	0.084216	0.084269	0.089723	0.082124	0.074977	0.073092	0.075387	0.074262	0.074369	0.076441	0.083567	0.082761	0.083563	0.08367	0.083618	0.083281	0.083759	0.082388	0.080629	0.080589	0.080155
657	0.075614	0.075613	0.075155	0.07572	0.076082	0.076551	0.075426	0.080765	0.083077	0.075899	0.077735	0.082837	0.08617	0.086898	0.084904	0.075358	0.075953	0.075852	0.079653	0.077448	0.082627	0.084627	0.085033	0.07825	0.077528	0.078401	0.08577	0.086374	0.08635	0.086407	0.09194	0.084224	0.076754	0.074752	0.077179	0.075996	0.076106	0.078304	0.085688	0.084859	0.085684	0.085795	0.085742	0.085397	0.085889	0.084492	0.082702	0.082658	0.082216
658	0.077454	0.077464	0.076985	0.077561	0.077936	0.078439	0.077286	0.082804	0.085168	0.077789	0.079691	0.084921	0.08832	0.089069	0.08705	0.077219	0.077845	0.077738	0.081671	0.079407	0.084724	0.086771	0.087187	0.080239	0.079492	0.080395	0.087933	0.088551	0.088524	0.088588	0.094195	0.08637	0.078666	0.076578	0.079101	0.077876	0.077988	0.080271	0.087852	0.087007	0.087848	0.087964	0.087908	0.087554	0.088064	0.086639	0.084825	0.084775	0.084332
659	0.079407	0.079423	0.078929	0.079516	0.0799	0.080427	0.079249	0.084901	0.087313	0.079775	0.081728	0.08705	0.090514	0.091282	0.089235	0.079184	0.079834	0.079721	0.083752	0.081445	0.086864	0.088952	0.089375	0.082296	0.081533	0.082458	0.090128	0.090763	0.09073	0.090804	0.096485	0.08855	0.08067	0.078519	0.081114	0.079858	0.079971	0.082311	0.090051	0.089194	0.090047	0.09017	0.090108	0.089746	0.090274	0.08882	0.086986	0.086928	0.08649
660	0.081433	0.081454	0.080948	0.081545	0.081938	0.08248	0.08128	0.087037	0.089496	0.081823	0.083818	0.089213	0.092742	0.093531	0.09145	0.081218	0.081887	0.081768	0.085877	0.083536	0.089038	0.091163	0.091593	0.084401	0.083625	0.084566	0.092349	0.093003	0.092964	0.093051	0.098807	0.090757	0.082737	0.080535	0.083188	0.081908	0.082021	0.0844	0.092279	0.091413	0.092274	0.092405	0.092335	0.091964	0.092516	0.091028	0.089175	0.089109	0.088678
661	0.083521	0.083545	0.083029	0.083637	0.084037	0.084589	0.083368	0.089209	0.091717	0.083925	0.085955	0.091406	0.095005	0.095815	0.093695	0.083309	0.083994	0.083869	0.088041	0.085673	0.091243	0.093404	0.093839	0.086545	0.085763	0.086714	0.094598	0.095273	0.095226	0.095328	0.10117	0.092992	0.084857	0.082613	0.085315	0.084014	0.084128	0.086532	0.094535	0.093663	0.094531	0.094671	0.094591	0.094211	0.094788	0.093263	0.091391	0.091316	0.090896
662	0.085651	0.085675	0.085152	0.085772	0.086179	0.086736	0.085492	0.091409	0.093969	0.086062	0.088125	0.093625	0.097299	0.098132	0.095968	0.085438	0.086136	0.086006	0.090234	0.087842	0.093473	0.095671	0.096112	0.088719	0.087931	0.088892	0.096872	0.09757	0.097515	0.097635	0.10356	0.095252	0.087014	0.084732	0.087478	0.086159	0.086273	0.088692	0.096819	0.095941	0.096815	0.096965	0.096873	0.096484	0.097089	0.095523	0.093631	0.093545	0.093139
663	0.087816	0.08784	0.08731	0.087943	0.088357	0.088917	0.087649	0.093636	0.096253	0.08823	0.090324	0.09587	0.099627	0.10048	0.09827	0.087599	0.088311	0.088174	0.092456	0.09004	0.09573	0.097967	0.098412	0.09092	0.090128	0.091096	0.099173	0.099898	0.099832	0.099974	0.106	0.097537	0.089203	0.086885	0.089674	0.088338	0.088451	0.090881	0.099132	0.098249	0.099127	0.09929	0.099185	0.098784	0.099421	0.097809	0.095896	0.095799	0.095408
664	0.090014	0.090036	0.089499	0.090148	0.090568	0.091129	0.089835	0.09589	0.098569	0.090426	0.092552	0.098142	0.10199	0.10287	0.1006	0.08979	0.090515	0.09037	0.094704	0.092266	0.098015	0.10029	0.10074	0.093147	0.092353	0.093326	0.1015	0.10226	0.10218	0.10235	0.10848	0.099851	0.091422	0.089069	0.0919	0.090548	0.09066	0.093095	0.10148	0.10059	0.10147	0.10165	0.10153	0.10111	0.10179	0.10012	0.098187	0.098076	0.097705
665	0.092239	0.092259	0.091715	0.092381	0.092809	0.093368	0.092045	0.098172	0.10092	0.092646	0.094807	0.10044	0.10439	0.1053	0.10297	0.092006	0.092744	0.092591	0.09698	0.094519	0.10033	0.10265	0.10311	0.095399	0.094602	0.095581	0.10387	0.10465	0.10456	0.10476	0.111	0.10219	0.093669	0.091279	0.094154	0.092785	0.092897	0.095333	0.10385	0.10296	0.10385	0.10404	0.1039	0.10347	0.10419	0.10247	0.10051	0.10038	0.10003
666	0.094493	0.094509	0.093959	0.094644	0.095079	0.095636	0.09428	0.10048	0.1033	0.094892	0.097089	0.10277	0.10683	0.10778	0.10537	0.094247	0.095	0.094838	0.099284	0.096798	0.10267	0.10504	0.1055	0.097676	0.096879	0.097863	0.10626	0.10709	0.10698	0.10721	0.11358	0.10457	0.095944	0.093515	0.096438	0.09505	0.095161	0.097598	0.10627	0.10537	0.10626	0.10647	0.10631	0.10587	0.10663	0.10484	0.10285	0.10271	0.10238
667	0.096768	0.09678	0.096222	0.09693	0.097374	0.097927	0.096535	0.10282	0.10573	0.097158	0.099396	0.10513	0.10931	0.1103	0.10781	0.096509	0.097277	0.097105	0.10161	0.099101	0.10505	0.10747	0.10794	0.099978	0.099179	0.10017	0.1087	0.10956	0.10944	0.1097	0.11622	0.10698	0.098243	0.095771	0.098746	0.097337	0.097448	0.099884	0.10872	0.10782	0.10871	0.10894	0.10876	0.1083	0.10911	0.10725	0.10523	0.10507	0.10477
668	0.09907	0.099077	0.098511	0.099242	0.099696	0.10025	0.098812	0.10519	0.10819	0.099448	0.10173	0.10752	0.11184	0.11287	0.11029	0.098794	0.099579	0.099397	0.10398	0.10143	0.10746	0.10994	0.11041	0.10231	0.10151	0.1025	0.11117	0.11208	0.11194	0.11224	0.11892	0.10943	0.10057	0.098049	0.10108	0.099652	0.099761	0.1022	0.11122	0.11031	0.11121	0.11146	0.11125	0.11078	0.11164	0.1097	0.10765	0.10747	0.10719
669	0.1014	0.1014	0.10083	0.10159	0.10205	0.10259	0.10112	0.10759	0.1107	0.10177	0.1041	0.10995	0.11443	0.11549	0.11282	0.10111	0.10191	0.10172	0.10637	0.10379	0.1099	0.11245	0.11293	0.10467	0.10386	0.10487	0.1137	0.11465	0.1145	0.11483	0.12169	0.11192	0.10293	0.10035	0.10345	0.102	0.1021	0.10454	0.11376	0.11285	0.11376	0.11403	0.11379	0.1133	0.11422	0.11219	0.1101	0.1099	0.10966
670	0.10376	0.10375	0.10317	0.10395	0.10443	0.10497	0.10344	0.11003	0.11325	0.10411	0.10649	0.11242	0.11706	0.11818	0.1154	0.10344	0.10427	0.10406	0.1088	0.10619	0.11239	0.11502	0.11551	0.10705	0.10625	0.10726	0.11627	0.11727	0.1171	0.11748	0.12454	0.11446	0.10531	0.10268	0.10585	0.10437	0.10448	0.10691	0.11636	0.11544	0.11635	0.11665	0.11638	0.11587	0.11685	0.11473	0.1126	0.11237	0.11216
671	0.10615	0.10613	0.10554	0.10636	0.10685	0.10738	0.1058	0.11252	0.11586	0.10648	0.10893	0.11493	0.11977	0.12094	0.11803	0.10581	0.10666	0.10643	0.11127	0.10862	0.11493	0.11763	0.11813	0.10948	0.10867	0.10969	0.11889	0.11996	0.11976	0.12019	0.12747	0.11705	0.10774	0.10504	0.10829	0.10677	0.10688	0.10931	0.11901	0.11809	0.11901	0.11933	0.11903	0.11849	0.11955	0.11732	0.11514	0.11489	0.11472
672	0.10857	0.10855	0.10794	0.1088	0.10931	0.10984	0.10819	0.11505	0.11853	0.10889	0.11141	0.1175	0.12254	0.12377	0.12073	0.10821	0.10908	0.10884	0.11379	0.11109	0.11752	0.12031	0.12082	0.11195	0.11114	0.11217	0.12158	0.12272	0.12249	0.12298	0.1305	0.1197	0.1102	0.10743	0.11077	0.10922	0.10933	0.11176	0.12173	0.1208	0.12172	0.12208	0.12175	0.12118	0.12232	0.11997	0.11773	0.11745	0.11733
673	0.11104	0.11101	0.11038	0.11129	0.11181	0.11233	0.11061	0.11763	0.12127	0.11133	0.11393	0.12011	0.12539	0.12668	0.12349	0.11064	0.11155	0.11129	0.11635	0.1136	0.12016	0.12306	0.12357	0.11446	0.11364	0.11468	0.12434	0.12554	0.12529	0.12584	0.13364	0.12241	0.11271	0.10985	0.11329	0.1117	0.11181	0.11424	0.12452	0.12359	0.12451	0.12491	0.12453	0.12393	0.12516	0.12268	0.12038	0.12007	0.11999
674	0.11355	0.11351	0.11287	0.11382	0.11436	0.11487	0.11308	0.12026	0.12408	0.11382	0.1165	0.12279	0.12832	0.12969	0.12633	0.11312	0.11406	0.11378	0.11898	0.11616	0.12287	0.12588	0.12641	0.11701	0.1162	0.11725	0.12717	0.12846	0.12818	0.12879	0.13689	0.12519	0.11526	0.11232	0.11587	0.11424	0.11434	0.11677	0.12739	0.12645	0.12738	0.12781	0.12739	0.12676	0.12809	0.12546	0.1231	0.12275	0.12272
675	0.11611	0.11606	0.1154	0.1164	0.11696	0.11747	0.11558	0.12296	0.12697	0.11635	0.11912	0.12554	0.13135	0.13281	0.12926	0.11565	0.11661	0.11632	0.12166	0.11878	0.12565	0.12878	0.12932	0.11963	0.11881	0.11987	0.13008	0.13146	0.13115	0.13183	0.14028	0.12805	0.11787	0.11483	0.1185	0.11682	0.11692	0.11936	0.13035	0.12939	0.13034	0.13081	0.13034	0.12967	0.13111	0.12832	0.12589	0.1255	0.12553
676	0.11872	0.11866	0.11798	0.11904	0.11962	0.12012	0.11814	0.12573	0.12995	0.11894	0.12181	0.12835	0.13448	0.13603	0.13227	0.11822	0.11923	0.1189	0.1244	0.12145	0.12851	0.13177	0.13232	0.1223	0.12148	0.12255	0.13309	0.13457	0.13421	0.13499	0.14381	0.13099	0.12054	0.11739	0.12119	0.11946	0.11956	0.12199	0.1334	0.13244	0.13339	0.13391	0.13338	0.13267	0.13424	0.13126	0.12875	0.12832	0.12841
677	0.12139	0.12132	0.12062	0.12174	0.12235	0.12283	0.12075	0.12857	0.13303	0.12158	0.12457	0.13125	0.13774	0.13939	0.1354	0.12085	0.1219	0.12155	0.12723	0.1242	0.13145	0.13486	0.13543	0.12504	0.12421	0.1253	0.1362	0.13779	0.13739	0.13826	0.14752	0.13403	0.12328	0.12	0.12396	0.12216	0.12227	0.1247	0.13657	0.13559	0.13655	0.13713	0.13654	0.13577	0.13749	0.1343	0.1317	0.13122	0.13138
678	0.12413	0.12405	0.12333	0.12451	0.12515	0.12562	0.12342	0.1315	0.13622	0.12428	0.1274	0.13424	0.14112	0.14289	0.13864	0.12354	0.12463	0.12426	0.13013	0.12701	0.13449	0.13806	0.13866	0.12785	0.12702	0.12813	0.13942	0.14114	0.1407	0.14167	0.15141	0.13717	0.12608	0.12267	0.12679	0.12494	0.12504	0.12746	0.13985	0.13886	0.13984	0.14047	0.13981	0.13899	0.14086	0.13745	0.13475	0.13421	0.13445
679	0.12695	0.12685	0.1261	0.12736	0.12803	0.12848	0.12616	0.13452	0.13954	0.12706	0.13031	0.13733	0.14465	0.14656	0.142	0.1263	0.12744	0.12704	0.13312	0.12991	0.13763	0.14139	0.142	0.13073	0.1299	0.13103	0.14277	0.14463	0.14414	0.14523	0.15551	0.14043	0.12897	0.12541	0.12971	0.12778	0.12788	0.13031	0.14327	0.14226	0.14325	0.14396	0.14321	0.14233	0.14438	0.14071	0.1379	0.13731	0.13763
680	0.12984	0.12972	0.12894	0.1303	0.131	0.13143	0.12897	0.13765	0.143	0.12991	0.13331	0.14054	0.14836	0.15041	0.14552	0.12914	0.13034	0.12989	0.13622	0.1329	0.14089	0.14487	0.1455	0.13372	0.13288	0.13403	0.14628	0.1483	0.14774	0.14897	0.15989	0.14384	0.13194	0.12822	0.13273	0.13072	0.13082	0.13324	0.14685	0.14582	0.14683	0.14761	0.14678	0.14583	0.14808	0.14412	0.14118	0.14052	0.14094
681	0.13283	0.13269	0.13187	0.13332	0.13406	0.13448	0.13186	0.14089	0.14661	0.13284	0.13642	0.14386	0.15225	0.15448	0.14921	0.13205	0.13331	0.13283	0.13942	0.13599	0.14428	0.1485	0.14916	0.13679	0.13595	0.13712	0.14994	0.15215	0.15152	0.1529	0.16454	0.14738	0.13502	0.13111	0.13584	0.13375	0.13384	0.13626	0.1506	0.14954	0.15058	0.15144	0.15051	0.14948	0.15196	0.14767	0.14458	0.14385	0.14438
682	0.1359	0.13574	0.13489	0.13645	0.13723	0.13762	0.13483	0.14425	0.15039	0.13586	0.13963	0.14732	0.15634	0.15876	0.15306	0.13506	0.13639	0.13586	0.14275	0.13918	0.14781	0.1523	0.15299	0.13997	0.13913	0.14032	0.15378	0.15618	0.15548	0.15703	0.16949	0.15109	0.1382	0.13409	0.13907	0.13687	0.13697	0.13938	0.15453	0.15344	0.15451	0.15547	0.15442	0.15331	0.15603	0.15138	0.14813	0.14731	0.14796
683	0.13909	0.13891	0.13802	0.13969	0.14052	0.14089	0.1379	0.14776	0.15437	0.13899	0.14297	0.15094	0.16069	0.16333	0.15713	0.13816	0.13957	0.139	0.14621	0.1425	0.15152	0.15631	0.15704	0.14328	0.14243	0.14365	0.15783	0.16047	0.15968	0.16142	0.17485	0.15499	0.1415	0.13716	0.14242	0.14012	0.14021	0.14262	0.15869	0.15757	0.15867	0.15973	0.15856	0.15735	0.16036	0.15529	0.15186	0.15094	0.15173
684	0.1424	0.14219	0.14126	0.14306	0.14394	0.14429	0.14107	0.15143	0.15857	0.14223	0.14645	0.15474	0.1653	0.1682	0.16144	0.14138	0.14287	0.14224	0.14983	0.14595	0.1554	0.16054	0.16131	0.14672	0.14586	0.14712	0.16211	0.16502	0.16413	0.1661	0.18064	0.15911	0.14493	0.14034	0.14592	0.14349	0.14358	0.14598	0.1631	0.16194	0.16307	0.16426	0.16295	0.16162	0.16496	0.15941	0.15577	0.15474	0.15568
685	0.14585	0.1456	0.14462	0.14657	0.14751	0.14783	0.14437	0.15528	0.16303	0.14559	0.15008	0.15873	0.17024	0.17343	0.16602	0.14472	0.14631	0.14562	0.15363	0.14955	0.1595	0.16504	0.16586	0.15031	0.14944	0.15073	0.16667	0.16989	0.16889	0.1711	0.18696	0.16346	0.14852	0.14364	0.14957	0.147	0.14709	0.14949	0.1678	0.16659	0.16777	0.1691	0.16762	0.16616	0.16988	0.16378	0.15989	0.15875	0.15986
686	0.14945	0.14917	0.14813	0.15025	0.15125	0.15154	0.1478	0.15934	0.16778	0.1491	0.15389	0.16296	0.17555	0.17909	0.17092	0.1482	0.1499	0.14914	0.15762	0.15333	0.16384	0.16984	0.17071	0.15408	0.15319	0.15453	0.17156	0.17512	0.17399	0.1765	0.19392	0.16811	0.15228	0.14708	0.1534	0.15067	0.15076	0.15316	0.17284	0.17157	0.17281	0.1743	0.17264	0.17102	0.17517	0.16843	0.16427	0.16299	0.16429
687	0.15322	0.1529	0.1518	0.1541	0.15518	0.15543	0.15139	0.16364	0.17288	0.15278	0.1579	0.16745	0.18131	0.18525	0.1762	0.15184	0.15366	0.15283	0.16185	0.15731	0.16847	0.175	0.17595	0.15804	0.15714	0.15853	0.17682	0.1808	0.17952	0.18236	0.20167	0.17309	0.15623	0.15067	0.15744	0.15453	0.15462	0.15701	0.17828	0.17694	0.17825	0.17993	0.17805	0.17625	0.18091	0.17343	0.16894	0.1675	0.16902
688	0.15719	0.15682	0.15565	0.15817	0.15933	0.15954	0.15514	0.16822	0.17837	0.15663	0.16215	0.17225	0.18759	0.19202	0.18191	0.15566	0.15762	0.1567	0.16633	0.16151	0.17342	0.18058	0.18161	0.16222	0.16131	0.16275	0.18252	0.18699	0.18553	0.18877	0.21037	0.17847	0.1604	0.15443	0.1617	0.1586	0.15868	0.16107	0.1842	0.18276	0.18416	0.18606	0.18393	0.18191	0.18717	0.17882	0.17395	0.17232	0.1741
689	0.16139	0.16096	0.15971	0.16247	0.16373	0.16389	0.15909	0.17311	0.18434	0.1607	0.16666	0.17741	0.19449	0.1995	0.18815	0.15969	0.16179	0.16078	0.17112	0.16597	0.17876	0.18666	0.18779	0.16666	0.16574	0.16724	0.18876	0.19379	0.19213	0.19584	0.22026	0.1843	0.16482	0.15839	0.16624	0.1629	0.16298	0.16537	0.19068	0.18912	0.19064	0.1928	0.19037	0.1881	0.19406	0.18468	0.17935	0.17752	0.17958
690	0.16584	0.16535	0.16401	0.16704	0.16841	0.16852	0.16326	0.17838	0.19086	0.165	0.17147	0.183	0.20215	0.20785	0.19501	0.16394	0.16623	0.1651	0.17626	0.17073	0.18455	0.19333	0.19458	0.1714	0.17045	0.17203	0.19563	0.20135	0.19945	0.2037	0.23164	0.19069	0.16954	0.16256	0.17108	0.16748	0.16755	0.16995	0.19784	0.19613	0.19779	0.20025	0.19749	0.19491	0.2017	0.19111	0.18522	0.18314	0.18554
691	0.17059	0.17003	0.16858	0.17192	0.17342	0.17347	0.16769	0.18409	0.19806	0.16957	0.17664	0.1891	0.21073	0.21729	0.20263	0.16847	0.17095	0.16971	0.18181	0.17583	0.19088	0.20073	0.20213	0.17649	0.1755	0.17718	0.20329	0.20983	0.20765	0.21255	0.24494	0.19776	0.17459	0.167	0.17629	0.17237	0.17244	0.17485	0.20584	0.20392	0.20579	0.2086	0.20544	0.20249	0.21027	0.19821	0.19165	0.1893	0.19207
692	0.17568	0.17504	0.17347	0.17718	0.17882	0.1788	0.17241	0.19032	0.20607	0.17447	0.18222	0.19581	0.22047	0.22808	0.21119	0.1733	0.17602	0.17463	0.18786	0.18134	0.19788	0.20902	0.21061	0.18198	0.18096	0.18275	0.21193	0.21947	0.21695	0.22264	0.26078	0.20566	0.18004	0.17173	0.18191	0.17762	0.1777	0.18013	0.21488	0.21269	0.21482	0.21807	0.21442	0.21101	0.22001	0.20617	0.19878	0.19609	0.1993
693	0.18118	0.18045	0.17873	0.18286	0.18468	0.18458	0.17748	0.19719	0.21508	0.17974	0.18831	0.20329	0.23166	0.24059	0.22094	0.1785	0.1815	0.17994	0.19451	0.18733	0.20568	0.21843	0.22027	0.18797	0.18689	0.18882	0.22181	0.23059	0.22765	0.2343	0.27999	0.2146	0.18596	0.1768	0.18804	0.18332	0.18339	0.18587	0.22524	0.22268	0.22516	0.22894	0.22472	0.22074	0.23123	0.21518	0.20676	0.20367	0.20739
694	0.18716	0.18632	0.18443	0.18905	0.19107	0.1909	0.18297	0.20484	0.22535	0.18546	0.195	0.21172	0.24472	0.25532	0.23218	0.18413	0.18745	0.1857	0.20188	0.19391	0.21449	0.22925	0.23142	0.19454	0.1934	0.19549	0.23328	0.24361	0.24017	0.24799	0.30378	0.22486	0.19245	0.18229	0.19477	0.18953	0.1896	0.19216	0.23728	0.23421	0.23719	0.24161	0.2367	0.23199	0.24434	0.22554	0.21581	0.21224	0.21656
695	0.19371	0.19274	0.19066	0.19586	0.19812	0.19785	0.18894	0.21346	0.23719	0.19172	0.20241	0.22135	0.26019	0.27293	0.24536	0.19028	0.19398	0.19201	0.21014	0.20119	0.22459	0.24189	0.2445	0.20184	0.2006	0.20291	0.24683	0.25912	0.25505	0.26434	0.33386	0.23682	0.19961	0.18826	0.20222	0.19636	0.19643	0.19911	0.25152	0.24774	0.25141	0.25663	0.25087	0.24524	0.25992	0.23765	0.22622	0.22207	0.2271
696	0.20097	0.19985	0.19752	0.20341	0.20597	0.20559	0.1955	0.2233	0.25106	0.19862	0.21073	0.23254	0.27889	0.29442	0.2611	0.19706	0.20121	0.19898	0.21954	0.20934	0.23633	0.25695	0.26016	0.21002	0.20865	0.21125	0.26317	0.27801	0.27316	0.28428	0.3728	0.25106	0.2076	0.19482	0.21058	0.20395	0.20403	0.2069	0.2687	0.26392	0.26857	0.27479	0.26798	0.26115	0.27883	0.25208	0.23841	0.23355	0.23941
697	0.20908	0.20778	0.20515	0.21187	0.21479	0.2143	0.20279	0.2347	0.26758	0.20633	0.22018	0.24578	0.30194	0.32116	0.28031	0.2046	0.20931	0.20676	0.23037	0.21858	0.25026	0.27525	0.2793	0.21934	0.21779	0.22075	0.28334	0.30151	0.29567	0.30913	0.42414	0.26838	0.21663	0.2021	0.22005	0.21248	0.21256	0.21574	0.28988	0.28366	0.28973	0.29722	0.28912	0.28069	0.30227	0.26967	0.25298	0.24723	0.25409
698	0.21826	0.21674	0.21375	0.22148	0.22483	0.22423	0.21099	0.24815	0.28764	0.21505	0.23107	0.26179	0.33097	0.35511	0.30428	0.21311	0.2185	0.21557	0.24308	0.22922	0.26714	0.29804	0.30327	0.23011	0.22829	0.23176	0.30888	0.3315	0.3244	0.34082	0.49236	0.28998	0.22698	0.21026	0.23096	0.22219	0.22228	0.22594	0.31665	0.30829	0.31647	0.32559	0.31588	0.30529	0.33203	0.29165	0.27081	0.26392	0.27196
699	0.2288	0.22702	0.22357	0.23253	0.23643	0.23573	0.22033	0.26436	0.31249	0.22505	0.24385	0.28166	0.36836	0.39905	0.33496	0.22283	0.22908	0.22569	0.2583	0.24166	0.2881	0.32715	0.33409	0.24279	0.24058	0.24474	0.34212	0.37075	0.36203	0.38223	0.58143	0.31769	0.23902	0.21955	0.2437	0.2334	0.23352	0.23792	0.35136	0.33981	0.35113	0.36235	0.35065	0.33712	0.37072	0.31992	0.29322	0.28487	0.29431
700	0.24108	0.239	0.23496	0.24546	0.25006	0.24926	0.23116	0.28433	0.34395	0.23674	0.25915	0.30698	0.41743	0.45668	0.37526	0.23414	0.24147	0.23753	0.27696	0.25652	0.31486	0.36534	0.37483	0.25806	0.25526	0.26041	0.38662	0.42329	0.41256	0.43742	0.68967	0.35433	0.25329	0.2303	0.2589	0.24657	0.24674	0.25233	0.39751	0.38115	0.39722	0.4111	0.39701	0.37945	0.42216	0.35735	0.32225	0.312	0.32308
701	0.25568	0.25322	0.24841	0.26085	0.26635	0.26551	0.24395	0.30957	0.38463	0.25067	0.27788	0.34023	0.48253	0.53224	0.42939	0.24754	0.2563	0.25165	0.30043	0.27466	0.35004	0.41675	0.43	0.27689	0.27321	0.27979	0.44751	0.49458	0.48149	0.5116	0.80057	0.40417	0.27058	0.24295	0.2774	0.26237	0.26261	0.27011	0.46006	0.43659	0.4597	0.47679	0.46004	0.4371	0.49147	0.40836	0.36112	0.34834	0.36127
702	0.27338	0.27047	0.26463	0.27957	0.28624	0.28548	0.2594	0.34236	0.43815	0.26768	0.30144	0.38507	0.56791	0.62807	0.50289	0.2638	0.27447	0.26892	0.33081	0.29742	0.39763	0.48706	0.50563	0.30082	0.29575	0.30448	0.5313	0.59011	0.57476	0.60932	0.8827	0.47331	0.29204	0.25817	0.3005	0.28175	0.28212	0.29271	0.54503	0.51168	0.54459	0.56498	0.54587	0.51637	0.58387	0.47918	0.41476	0.39863	0.41352
703	0.29536	0.29191	0.28468	0.30285	0.31112	0.31064	0.27857	0.38613	0.50902	0.28904	0.33193	0.44667	0.67354	0.7382	0.60084	0.28405	0.29735	0.29062	0.37129	0.32683	0.46328	0.58221	0.60736	0.3322	0.32494	0.33695	0.64235	0.70912	0.69308	0.7275	0.91424	0.56855	0.31943	0.27697	0.33013	0.30617	0.30673	0.32238	0.65574	0.61136	0.65525	0.67739	0.65777	0.62245	0.69923	0.5766	0.49025	0.4698	0.48646
704	0.3234	0.31932	0.31014	0.33259	0.34302	0.34322	0.30308	0.44578	0.60102	0.31672	0.37257	0.53074	0.78602	0.84046	0.72059	0.31004	0.32706	0.31879	0.42648	0.36606	0.5533	0.70205	0.73212	0.3747	0.36398	0.38107	0.77152	0.83156	0.81858	0.84368	0.90237	0.69106	0.3554	0.30089	0.36924	0.33783	0.33872	0.36256	0.78185	0.73225	0.7814	0.80064	0.78474	0.74969	0.82019	0.701	0.595	0.56972	0.58734
705	0.36019	0.35543	0.34346	0.37162	0.38501	0.38663	0.33547	0.52729	0.71153	0.35383	0.42813	0.63911	0.87504	0.90427	0.83905	0.34455	0.36695	0.35657	0.50226	0.41993	0.66911	0.82637	0.85362	0.43382	0.41777	0.44254	0.88367	0.91731	0.91101	0.91986	0.86651	0.82142	0.40398	0.33232	0.42214	0.38014	0.38155	0.41816	0.88871	0.84972	0.88844	0.89896	0.8912	0.86758	0.90931	0.83071	0.72748	0.69923	0.71603
706	0.4098	0.40439	0.38844	0.42415	0.44159	0.4458	0.37975	0.63415	0.82197	0.4052	0.50489	0.75946	0.91454	0.91768	0.91659	0.39192	0.42215	0.40887	0.60318	0.49517	0.79428	0.91379	0.92878	0.51663	0.49315	0.52854	0.93849	0.94181	0.94162	0.93753	0.81926	0.91589	0.47079	0.37509	0.49462	0.43819	0.44036	0.495	0.93906	0.9236	0.93902	0.93998	0.94014	0.9336	0.93989	0.92079	0.85898	0.8344	0.84787
707	0.47807	0.47224	0.4508	0.49606	0.51862	0.52702	0.44204	0.75727	0.89938	0.47776	0.60815	0.85946	0.90721	0.8947	0.93407	0.45868	0.49984	0.48267	0.7243	0.59839	0.89015	0.93878	0.9406	0.6282	0.59687	0.64332	0.9336	0.91961	0.92233	0.91309	0.76694	0.94501	0.56208	0.43508	0.59205	0.51876	0.52184	0.59672	0.93241	0.93696	0.93251	0.92828	0.9323	0.93742	0.92237	0.94474	0.93955	0.92593	0.9347
708	0.57177	0.56612	0.53801	0.59353	0.62126	0.63478	0.53032	0.86479	0.92381	0.57909	0.73348	0.90809	0.87282	0.85317	0.90879	0.55297	0.60705	0.58542	0.83983	0.72722	0.9269	0.9164	0.91076	0.75989	0.7265	0.77549	0.89588	0.87543	0.87904	0.86878	0.71296	0.92346	0.67946	0.52035	0.71257	0.62759	0.63124	0.717	0.8946	0.90913	0.89475	0.88887	0.8939	0.9037	0.88089	0.92023	0.95025	0.94725	0.95251
709	0.69298	0.68844	0.65542	0.71643	0.74557	0.76165	0.65005	0.92005	0.90602	0.70923	0.85306	0.90537	0.82565	0.80297	0.86361	0.6787	0.7406	0.71655	0.91135	0.85409	0.91328	0.87194	0.86273	0.876	0.85401	0.88652	0.84429	0.82166	0.82538	0.81562	0.65904	0.87859	0.80726	0.63767	0.8343	0.75905	0.76183	0.83041	0.84343	0.86268	0.84358	0.83741	0.84239	0.85393	0.82886	0.87403	0.91772	0.92002	0.92397
710	0.82377	0.82115	0.79206	0.84286	0.86404	0.87501	0.78879	0.91988	0.866	0.84232	0.9243	0.87227	0.77274	0.74924	0.80955	0.81794	0.86846	0.84892	0.92503	0.93161	0.87358	0.81777	0.80671	0.93382	0.93146	0.93654	0.78663	0.76401	0.76742	0.75894	0.60598	0.82353	0.90517	0.77834	0.91639	0.87958	0.8796	0.90091	0.78644	0.80799	0.7866	0.78079	0.78517	0.7971	0.7724	0.81836	0.86709	0.87161	0.8754
711	0.91942	0.91849	0.90524	0.92815	0.93417	0.93442	0.90172	0.88658	0.81552	0.92826	0.93448	0.82425	0.71791	0.69471	0.75208	0.9209	0.94093	0.93206	0.89923	0.94343	0.82183	0.75981	0.74782	0.93129	0.94277	0.92878	0.72702	0.70544	0.70832	0.70149	0.5541	0.76443	0.94155	0.89956	0.93789	0.9435	0.94081	0.91567	0.72766	0.75034	0.7278	0.72268	0.72618	0.73783	0.71476	0.75901	0.80879	0.81408	0.81827
712	0.94899	0.94869	0.9519	0.94853	0.94283	0.93488	0.94664	0.83762	0.76078	0.94499	0.90513	0.76948	0.663	0.64067	0.69385	0.9523	0.94609	0.94596	0.8538	0.9132	0.765	0.70092	0.68842	0.8946	0.91208	0.88975	0.66725	0.64723	0.64946	0.64447	0.50346	0.70425	0.9262	0.95314	0.91507	0.94397	0.94028	0.89101	0.66884	0.69219	0.66896	0.6647	0.66713	0.67821	0.65735	0.69873	0.74786	0.75318	0.75812
713	0.92768	0.92731	0.9387	0.92291	0.91214	0.90038	0.93226	0.78184	0.70481	0.91596	0.85713	0.71201	0.60887	0.58768	0.63602	0.92972	0.91146	0.91538	0.7995	0.86392	0.70645	0.64236	0.62955	0.84265	0.86246	0.83684	0.60818	0.58997	0.59149	0.58843	0.45398	0.64427	0.88417	0.94268	0.8703	0.90795	0.90427	0.84606	0.6108	0.63464	0.61091	0.60759	0.60882	0.6192	0.60083	0.63872	0.68645	0.69142	0.69734
714	0.88205	0.88142	0.89563	0.87578	0.86334	0.84994	0.88857	0.7235	0.64905	0.86642	0.80105	0.65382	0.5559	0.53595	0.57916	0.88244	0.85964	0.86516	0.74164	0.80664	0.64774	0.58472	0.57169	0.78432	0.80492	0.7782	0.55017	0.53389	0.53468	0.53356	0.40556	0.58509	0.8304	0.90006	0.81587	0.85604	0.85259	0.7917	0.55391	0.57818	0.55399	0.55165	0.55162	0.56123	0.54544	0.57958	0.62554	0.62994	0.637
715	0.82608	0.82511	0.84009	0.81952	0.80683	0.7927	0.83253	0.66458	0.59415	0.80822	0.74183	0.59588	0.50414	0.48545	0.52345	0.82488	0.80068	0.80668	0.68267	0.74638	0.58962	0.52822	0.51502	0.72366	0.7444	0.71754	0.49339	0.47904	0.47911	0.47987	0.3582	0.52697	0.77185	0.84418	0.75756	0.79756	0.79437	0.73326	0.49824	0.52294	0.49831	0.49693	0.49563	0.50446	0.49121	0.52151	0.56556	0.56927	0.57756
716	0.76635	0.76501	0.77991	0.76005	0.74771	0.73317	0.77183	0.6061	0.54039	0.74696	0.6819	0.5387	0.45356	0.43606	0.46895	0.76363	0.73939	0.74534	0.62385	0.68552	0.53243	0.47293	0.4596	0.66263	0.6833	0.65664	0.43789	0.42541	0.42481	0.42733	0.3121	0.47	0.71191	0.78339	0.69825	0.73701	0.73404	0.67348	0.44384	0.46892	0.44389	0.44343	0.44089	0.44894	0.43813	0.46465	0.5067	0.50966	0.51922
717	0.70551	0.70375	0.71817	0.69974	0.68804	0.67318	0.7095	0.54848	0.48778	0.68484	0.62225	0.48249	0.40408	0.38771	0.41565	0.70127	0.67764	0.68326	0.56571	0.62504	0.4763	0.41887	0.40545	0.60205	0.62256	0.59626	0.38379	0.37309	0.3719	0.37596	0.26781	0.41428	0.65194	0.72088	0.6391	0.67614	0.67336	0.61354	0.39073	0.41609	0.39076	0.39114	0.38748	0.39476	0.38619	0.40907	0.44904	0.45125	0.46202
718	0.64481	0.64261	0.65638	0.63972	0.62878	0.61363	0.64702	0.49191	0.43628	0.62294	0.56335	0.42741	0.35574	0.34045	0.36368	0.63902	0.6163	0.62145	0.50849	0.56536	0.42133	0.36616	0.35278	0.54229	0.56262	0.53674	0.33143	0.32239	0.32073	0.32603	0.22632	0.36002	0.5926	0.65821	0.58066	0.61579	0.61316	0.55407	0.33915	0.36452	0.33917	0.34024	0.33564	0.34219	0.3356	0.35503	0.39275	0.39426	0.40606
719	0.58492	0.58224	0.5953	0.58057	0.57043	0.55496	0.58516	0.43651	0.38588	0.5618	0.50545	0.37367	0.30879	0.2946	0.31338	0.57753	0.55585	0.56046	0.45231	0.50672	0.3677	0.31518	0.30205	0.48358	0.50372	0.47829	0.28145	0.27395	0.27199	0.27809	0.18894	0.30773	0.53421	0.5962	0.52319	0.55637	0.55387	0.4954	0.28962	0.31454	0.28962	0.29124	0.28597	0.29177	0.28689	0.30305	0.33816	0.33905	0.35158
720	0.52611	0.52292	0.53527	0.52252	0.51318	0.49736	0.52429	0.38244	0.33672	0.50171	0.44864	0.3217	0.26386	0.2509	0.26551	0.51708	0.49648	0.50052	0.39733	0.44921	0.31584	0.26669	0.25416	0.42607	0.44597	0.42104	0.23493	0.2289	0.22682	0.23321	0.15697	0.25834	0.47688	0.53518	0.46678	0.49803	0.49566	0.43778	0.24311	0.26686	0.24311	0.24504	0.23949	0.2445	0.24103	0.25409	0.286	0.28638	0.29916
721	0.46846	0.46477	0.4764	0.46561	0.45705	0.44089	0.46458	0.33007	0.28927	0.44281	0.39307	0.27229	0.222	0.2105	0.22127	0.45781	0.4383	0.44178	0.34384	0.39299	0.2666	0.22191	0.21046	0.37002	0.38955	0.36526	0.19337	0.1887	0.18671	0.19283	0.13123	0.21325	0.4207	0.47531	0.4115	0.44086	0.4386	0.38149	0.20104	0.22267	0.20103	0.20304	0.19763	0.20181	0.19946	0.20958	0.23748	0.2375	0.24987
722	0.41208	0.4079	0.41881	0.40991	0.40211	0.3857	0.40623	0.28008	0.2444	0.38533	0.33907	0.22665	0.18457	0.17481	0.18216	0.39991	0.38152	0.38448	0.29248	0.3384	0.22126	0.18239	0.1725	0.31596	0.33484	0.31152	0.15823	0.15481	0.15308	0.15844	0.11173	0.17412	0.36586	0.41673	0.35756	0.38499	0.38285	0.32703	0.16489	0.18347	0.16488	0.16677	0.16191	0.16522	0.16373	0.17113	0.19423	0.19403	0.20526
723	0.35719	0.35261	0.36277	0.35564	0.34857	0.33214	0.34963	0.23361	0.20343	0.32977	0.28736	0.18631	0.1529	0.14506	0.14958	0.34378	0.3266	0.32908	0.24436	0.28619	0.18143	0.14952	0.14152	0.26485	0.28264	0.2608	0.13039	0.12805	0.12665	0.13099	0.097701	0.14224	0.31287	0.35977	0.30548	0.33081	0.3288	0.27532	0.13577	0.15069	0.13575	0.13736	0.13333	0.1358	0.13493	0.13997	0.15786	0.15756	0.16702
724	0.30436	0.29952	0.30884	0.30332	0.29702	0.28096	0.29551	0.19218	0.16784	0.277	0.2391	0.15266	0.12772	0.12178	0.12416	0.29017	0.27441	0.27647	0.201	0.23758	0.14848	0.12393	0.11787	0.21815	0.2342	0.21459	0.10971	0.10821	0.10715	0.11046	0.088015	0.11799	0.26265	0.30508	0.25625	0.2791	0.27727	0.22771	0.11378	0.12502	0.11377	0.11504	0.11191	0.11365	0.11321	0.11636	0.1293	0.129	0.13637
725	0.2546	0.24973	0.25804	0.25396	0.24847	0.23338	0.2451	0.15725	0.13878	0.22842	0.19593	0.12637	0.10889	0.10462	0.10551	0.24033	0.22637	0.22804	0.16403	0.19424	0.12299	0.10521	0.10084	0.17755	0.19122	0.17461	0.095126	0.094253	0.093474	0.095914	0.081572	0.10061	0.21666	0.25379	0.21132	0.23116	0.22956	0.18587	0.098082	0.10615	0.098073	0.099041	0.096706	0.097877	0.097736	0.099509	0.10832	0.10806	0.11344
726	0.20938	0.20478	0.21188	0.20905	0.20446	0.19105	0.20004	0.12969	0.11655	0.18576	0.15948	0.10706	0.095492	0.092564	0.092484	0.19596	0.18419	0.1855	0.13453	0.15782	0.10445	0.092163	0.08912	0.14446	0.15531	0.14218	0.08524	0.084803	0.084235	0.086015	0.077496	0.0887	0.17661	0.20752	0.1724	0.18869	0.18738	0.15129	0.087341	0.092945	0.087333	0.08806	0.086349	0.087102	0.087162	0.087985	0.093707	0.093498	0.097258
727	0.17042	0.16639	0.1721	0.17029	0.16667	0.15555	0.16202	0.10927	0.10048	0.15058	0.13073	0.093546	0.086325	0.0844	0.083706	0.15872	0.14944	0.15041	0.1125	0.12925	0.091585	0.083387	0.081314	0.1193	0.12732	0.11765	0.078758	0.078623	0.078209	0.079511	0.075144	0.080807	0.1439	0.16802	0.14081	0.1533	0.1523	0.12458	0.080235	0.084036	0.080228	0.080777	0.079528	0.07998	0.080181	0.080361	0.083899	0.083733	0.086293
728	0.13899	0.13573	0.14001	0.13898	0.13632	0.12777	0.13207	0.094907	0.089367	0.12353	0.10951	0.084424	0.080282	0.079091	0.077999	0.12958	0.12275	0.12342	0.09694	0.10828	0.082957	0.07769	0.076317	0.1013	0.10689	0.10017	0.074709	0.074786	0.074483	0.075439	0.074053	0.07577	0.119	0.13653	0.11689	0.1258	0.1251	0.10521	0.075733	0.078232	0.075727	0.076147	0.075236	0.075473	0.075774	0.075513	0.077521	0.077389	0.079096
729	0.11533	0.11288	0.11586	0.11539	0.11356	0.10739	0.11003	0.085175	0.081946	0.10403	0.094672	0.078476	0.076509	0.075852	0.074498	0.10825	0.10353	0.10397	0.086373	0.093694	0.077375	0.0742	0.073333	0.088993	0.092724	0.088245	0.072412	0.072639	0.072417	0.073121	0.073882	0.072772	0.10116	0.11313	0.09981	0.1058	0.10533	0.091813	0.073105	0.074659	0.073099	0.073425	0.072762	0.072844	0.073216	0.072649	0.073573	0.073468	0.074564
730	0.098535	0.096775	0.098748	0.098627	0.097453	0.093208	0.094672	0.0788	0.0772	0.090636	0.084674	0.074809	0.07439	0.074122	0.072594	0.093444	0.090322	0.090599	0.079428	0.0839	0.073977	0.072307	0.071808	0.080839	0.083241	0.080363	0.071385	0.071718	0.071555	0.072077	0.07438	0.071245	0.088947	0.096702	0.088141	0.091958	0.091672	0.082862	0.071834	0.072701	0.07183	0.072086	0.071606	0.071575	0.072	0.071218	0.071366	0.071282	0.071938
731	0.08711	0.085882	0.087119	0.087219	0.086515	0.083688	0.084357	0.074838	0.074392	0.081738	0.078163	0.072793	0.073479	0.073496	0.071851	0.083535	0.081556	0.081717	0.075073	0.077544	0.07216	0.071574	0.071341	0.075642	0.077107	0.075358	0.071277	0.071688	0.071567	0.071957	0.075365	0.070783	0.080862	0.085626	0.080435	0.082719	0.082558	0.077095	0.071551	0.071918	0.071547	0.071753	0.071407	0.071294	0.071758	0.070824	0.070418	0.070349	0.070688
732	0.079601	0.078757	0.079481	0.079718	0.07934	0.077519	0.077655	0.072608	0.072986	0.076031	0.074125	0.071969	0.073445	0.073668	0.071945	0.077119	0.075939	0.076021	0.07257	0.07362	0.071481	0.071676	0.071637	0.072544	0.073342	0.072396	0.071831	0.072298	0.072207	0.072504	0.076702	0.071086	0.075712	0.078396	0.075548	0.076761	0.076688	0.073588	0.071978	0.071984	0.071974	0.072144	0.071896	0.071723	0.072218	0.071176	0.070374	0.070316	0.070427
733	0.074862	0.074293	0.074658	0.074983	0.074833	0.073726	0.073498	0.071631	0.072599	0.072577	0.071855	0.072004	0.074045	0.07442	0.072643	0.073163	0.072547	0.072574	0.071401	0.071435	0.071624	0.07238	0.072481	0.070952	0.07127	0.070902	0.072861	0.073368	0.073298	0.07353	0.078292	0.071939	0.072648	0.073869	0.072668	0.073125	0.073113	0.071701	0.072917	0.072662	0.072913	0.073058	0.072879	0.072663	0.073182	0.072063	0.070979	0.070928	0.070877
734	0.07209	0.07172	0.071829	0.072214	0.072226	0.071632	0.071148	0.071558	0.072949	0.070731	0.070857	0.072658	0.075103	0.075589	0.073775	0.070958	0.070745	0.070733	0.071194	0.0705	0.072357	0.073517	0.073718	0.070443	0.070418	0.070464	0.074231	0.074769	0.074712	0.0749	0.080066	0.073184	0.071079	0.071256	0.071231	0.071146	0.071178	0.070978	0.074222	0.073779	0.074218	0.074346	0.074217	0.073968	0.074508	0.073332	0.072049	0.072002	0.071837
735	0.070732	0.070506	0.070433	0.070858	0.070984	0.070761	0.070097	0.072135	0.07383	0.070043	0.070776	0.073756	0.076492	0.07706	0.075218	0.070011	0.070089	0.070049	0.071678	0.070465	0.073514	0.074964	0.075237	0.070714	0.070442	0.070785	0.075844	0.076407	0.076359	0.076516	0.081975	0.07471	0.070587	0.070018	0.070833	0.07036	0.070424	0.071093	0.07579	0.075212	0.075786	0.075903	0.075809	0.075536	0.076093	0.074875	0.07345	0.073405	0.073161
736	0.070394	0.070271	0.070068	0.07052	0.070729	0.070771	0.069981	0.07318	0.075093	0.070188	0.071354	0.075172	0.07812	0.078748	0.076885	0.069971	0.070256	0.070195	0.072659	0.071076	0.074975	0.076634	0.076959	0.071543	0.071096	0.071651	0.077633	0.078215	0.078172	0.078311	0.083983	0.076438	0.070871	0.069769	0.071184	0.070434	0.070521	0.07181	0.077547	0.076872	0.077544	0.077654	0.077583	0.077292	0.077866	0.076614	0.075088	0.075044	0.074745
737	0.070796	0.070748	0.070452	0.070924	0.071191	0.071422	0.070542	0.074564	0.076634	0.070935	0.072408	0.07682	0.079922	0.080596	0.078716	0.070586	0.071019	0.070944	0.073999	0.072156	0.076656	0.078465	0.078828	0.072776	0.072205	0.072909	0.079549	0.080147	0.080107	0.080235	0.086066	0.078311	0.071718	0.070237	0.072078	0.071132	0.071234	0.072961	0.079442	0.078698	0.079438	0.079545	0.07949	0.079185	0.079774	0.078495	0.076898	0.076853	0.076518
738	0.07172	0.071725	0.071364	0.071849	0.072158	0.072523	0.07158	0.076186	0.078372	0.072105	0.073798	0.078629	0.081849	0.082558	0.080661	0.071663	0.072202	0.072116	0.075591	0.073563	0.078492	0.080411	0.080801	0.074293	0.073634	0.074444	0.081554	0.082167	0.082127	0.082251	0.088206	0.080286	0.07296	0.071209	0.073353	0.072268	0.072381	0.074417	0.081434	0.080641	0.08143	0.081536	0.08149	0.081173	0.081779	0.080475	0.078827	0.07878	0.078422
739	0.073015	0.073058	0.072649	0.073145	0.073484	0.073944	0.072955	0.077977	0.08025	0.073575	0.075425	0.080554	0.083866	0.084604	0.082689	0.073067	0.073681	0.073587	0.077364	0.075204	0.080438	0.082439	0.082849	0.07601	0.075289	0.076175	0.083624	0.084252	0.08421	0.084336	0.090392	0.082336	0.074482	0.072538	0.0749	0.073715	0.073835	0.076089	0.083497	0.082669	0.083493	0.083601	0.083559	0.083233	0.083855	0.082527	0.080842	0.080791	0.080421
740	0.074578	0.074647	0.074206	0.07471	0.07507	0.075597	0.074573	0.079892	0.082234	0.075261	0.077225	0.082564	0.085954	0.086717	0.084781	0.074707	0.075376	0.075275	0.079266	0.077014	0.082466	0.08453	0.084954	0.077873	0.077109	0.078048	0.085745	0.086388	0.086343	0.086473	0.092619	0.08444	0.076208	0.074126	0.076643	0.075387	0.075513	0.077918	0.085614	0.084762	0.085611	0.085722	0.085681	0.085345	0.085986	0.084634	0.082921	0.082865	0.08249
741	0.076325	0.076414	0.075948	0.07646	0.076836	0.07741	0.076359	0.081894	0.084293	0.077097	0.079144	0.084636	0.088095	0.08888	0.086921	0.076509	0.077219	0.077111	0.08126	0.078941	0.084553	0.086668	0.087103	0.079836	0.079042	0.080018	0.087905	0.088563	0.088514	0.088653	0.094882	0.086587	0.078075	0.07589	0.078522	0.077215	0.077344	0.079855	0.087774	0.086904	0.08777	0.087886	0.087843	0.087499	0.08816	0.086781	0.085046	0.084983	0.084609
742	0.07821	0.078311	0.077828	0.078348	0.078736	0.079342	0.078268	0.083962	0.086413	0.079043	0.081153	0.086755	0.090281	0.091088	0.0891	0.078431	0.079171	0.079058	0.083323	0.080955	0.086686	0.088844	0.089288	0.081874	0.08106	0.082063	0.090097	0.090774	0.090719	0.090869	0.09718	0.088768	0.080046	0.077786	0.080504	0.079158	0.079289	0.081872	0.08997	0.089086	0.089966	0.090088	0.090039	0.089687	0.090371	0.088963	0.087208	0.087138	0.086769
743	0.080196	0.080306	0.07981	0.080338	0.080736	0.081363	0.080268	0.08608	0.088581	0.08107	0.083229	0.088913	0.092507	0.093334	0.091314	0.080442	0.081205	0.081086	0.08544	0.083034	0.088857	0.091055	0.091505	0.08397	0.083142	0.084163	0.092319	0.093015	0.092953	0.093118	0.099514	0.09098	0.082096	0.079778	0.082562	0.081187	0.081319	0.08395	0.092197	0.091304	0.092193	0.092324	0.092267	0.091906	0.092615	0.091174	0.089401	0.089323	0.088963
744	0.082261	0.082375	0.08187	0.082406	0.082812	0.083453	0.082338	0.088241	0.09079	0.08316	0.085359	0.091104	0.094767	0.095617	0.093559	0.082521	0.083301	0.083177	0.087599	0.085166	0.091061	0.093296	0.093752	0.086111	0.085274	0.086308	0.094569	0.095286	0.095216	0.095399	0.10188	0.093219	0.084207	0.081844	0.08468	0.083283	0.083416	0.086075	0.094454	0.093554	0.09445	0.09459	0.094523	0.094154	0.09489	0.093413	0.091622	0.091535	0.091187
745	0.08437	0.084488	0.083974	0.084521	0.084934	0.085583	0.084449	0.090429	0.093029	0.085287	0.087521	0.09332	0.097059	0.097932	0.095831	0.084639	0.085435	0.085305	0.089788	0.087329	0.09329	0.095562	0.096024	0.088281	0.087438	0.088481	0.096843	0.097585	0.097505	0.097708	0.10429	0.095483	0.086356	0.083953	0.086835	0.085419	0.085552	0.088231	0.096738	0.095831	0.096733	0.096884	0.096806	0.096426	0.097194	0.095676	0.093866	0.093768	0.093435
746	0.086523	0.086642	0.086122	0.08668	0.087099	0.087753	0.086598	0.092647	0.095301	0.08745	0.089716	0.095563	0.099383	0.10028	0.098132	0.086796	0.087606	0.08747	0.092006	0.089525	0.095546	0.097857	0.098325	0.09048	0.089632	0.090684	0.099145	0.099913	0.099824	0.10005	0.10674	0.097773	0.088541	0.086102	0.089026	0.087593	0.087726	0.090417	0.09905	0.098138	0.099046	0.099209	0.099117	0.098726	0.099529	0.097965	0.096136	0.096025	0.095709
747	0.088702	0.088821	0.088294	0.088866	0.089291	0.089948	0.088769	0.094888	0.097602	0.089634	0.091935	0.097829	0.10174	0.10267	0.10046	0.088975	0.089799	0.089655	0.094247	0.091743	0.097827	0.10018	0.10065	0.0927	0.091849	0.092907	0.10147	0.10227	0.10217	0.10242	0.10923	0.10009	0.090749	0.088274	0.091242	0.089791	0.089923	0.092623	0.10139	0.10047	0.10139	0.10156	0.10146	0.10105	0.10189	0.10028	0.098429	0.098305	0.098008
748	0.090911	0.091029	0.090495	0.091082	0.091515	0.092172	0.090966	0.097156	0.099935	0.091845	0.09418	0.10012	0.10413	0.10509	0.10282	0.09118	0.092018	0.091868	0.096516	0.093988	0.10014	0.10253	0.10301	0.094945	0.094092	0.095156	0.10384	0.10467	0.10455	0.10483	0.11177	0.10243	0.092986	0.090474	0.093487	0.092017	0.09215	0.094855	0.10377	0.10285	0.10376	0.10395	0.10383	0.10341	0.1043	0.10262	0.10075	0.10061	0.10034
749	0.093143	0.093259	0.092719	0.093323	0.093764	0.09442	0.093184	0.09945	0.1023	0.094076	0.09645	0.10244	0.10657	0.10756	0.10522	0.093407	0.09426	0.094101	0.09881	0.096256	0.10247	0.10492	0.10541	0.097213	0.096357	0.097429	0.10623	0.1071	0.10697	0.10728	0.11437	0.10481	0.095248	0.092695	0.095756	0.094267	0.094399	0.097108	0.10618	0.10525	0.10617	0.10638	0.10624	0.10581	0.10674	0.105	0.1031	0.10294	0.10269
750	0.095402	0.095516	0.094968	0.095593	0.096041	0.096696	0.095426	0.10177	0.10471	0.096332	0.098748	0.1048	0.10905	0.11007	0.10766	0.095658	0.096528	0.096359	0.10113	0.098552	0.10484	0.10735	0.10784	0.099508	0.09865	0.099728	0.10866	0.10957	0.10943	0.10977	0.11702	0.10723	0.097537	0.09494	0.098055	0.096545	0.096676	0.099388	0.10863	0.1077	0.10862	0.10885	0.10868	0.10824	0.10922	0.10741	0.10548	0.10531	0.10508
751	0.097687	0.097797	0.097242	0.097889	0.098347	0.098999	0.097691	0.10413	0.10715	0.098612	0.10107	0.10718	0.11157	0.11264	0.11014	0.097933	0.09882	0.098641	0.10349	0.10088	0.10725	0.10982	0.11031	0.10183	0.10097	0.10206	0.11114	0.11209	0.11193	0.11231	0.11974	0.10968	0.099854	0.097209	0.10038	0.098849	0.09898	0.10169	0.11112	0.11019	0.11112	0.11137	0.11118	0.11071	0.11175	0.10987	0.1079	0.10771	0.10751
752	0.1	0.10011	0.099542	0.10021	0.10068	0.10133	0.099981	0.10652	0.10964	0.10092	0.10343	0.10961	0.11415	0.11526	0.11266	0.10023	0.10114	0.10095	0.10588	0.10323	0.1097	0.11233	0.11283	0.10418	0.10332	0.10441	0.11366	0.11466	0.11448	0.11491	0.12254	0.11218	0.1022	0.099503	0.10274	0.10118	0.10131	0.10403	0.11367	0.11272	0.11366	0.11393	0.11371	0.11323	0.11433	0.11236	0.11036	0.11014	0.10998
753	0.10234	0.10245	0.10187	0.10257	0.10305	0.1037	0.1023	0.10894	0.11218	0.10325	0.10582	0.11207	0.11678	0.11795	0.11524	0.10256	0.10349	0.10329	0.1083	0.10562	0.11218	0.11489	0.1154	0.10657	0.1057	0.10681	0.11623	0.11729	0.11709	0.11756	0.12541	0.11472	0.10458	0.10183	0.10514	0.10355	0.10368	0.1064	0.11626	0.11531	0.11626	0.11655	0.11631	0.1158	0.11698	0.11491	0.11286	0.11262	0.1125
754	0.10472	0.10482	0.10423	0.10497	0.10546	0.1061	0.10465	0.11141	0.11477	0.10562	0.10825	0.11459	0.11949	0.1207	0.11787	0.10493	0.10588	0.10566	0.11077	0.10804	0.11472	0.11751	0.11803	0.10899	0.10812	0.10923	0.11886	0.11998	0.11976	0.12028	0.12838	0.11732	0.107	0.10418	0.10757	0.10595	0.10608	0.1088	0.11892	0.11796	0.11891	0.11924	0.11896	0.11843	0.11968	0.1175	0.11541	0.11515	0.11506
755	0.10713	0.10722	0.10662	0.10739	0.1079	0.10853	0.10702	0.11392	0.11742	0.10802	0.11072	0.11715	0.12225	0.12353	0.12057	0.10732	0.10829	0.10806	0.11328	0.11051	0.11731	0.12019	0.12072	0.11145	0.11058	0.1117	0.12155	0.12274	0.12249	0.12307	0.13144	0.11998	0.10946	0.10656	0.11004	0.10838	0.10851	0.11124	0.12164	0.12068	0.12163	0.12199	0.12167	0.12111	0.12246	0.12016	0.11802	0.11772	0.11768
756	0.10958	0.10966	0.10905	0.10986	0.11038	0.11101	0.10943	0.11648	0.12013	0.11045	0.11323	0.11976	0.12509	0.12644	0.12333	0.10974	0.11075	0.1105	0.11584	0.11301	0.11995	0.12293	0.12347	0.11395	0.11308	0.11421	0.12431	0.12557	0.12529	0.12594	0.13461	0.1227	0.11195	0.10898	0.11256	0.11086	0.11099	0.11371	0.12443	0.12346	0.12442	0.12481	0.12445	0.12386	0.1253	0.12287	0.12068	0.12035	0.12035
757	0.11207	0.11214	0.11152	0.11237	0.11291	0.11353	0.11188	0.1191	0.12292	0.11293	0.11579	0.12243	0.12803	0.12945	0.12617	0.11221	0.11325	0.11298	0.11845	0.11557	0.12266	0.12575	0.12631	0.11651	0.11563	0.11677	0.12714	0.12849	0.12818	0.1289	0.13791	0.12549	0.1145	0.11143	0.11512	0.11338	0.11351	0.11624	0.1273	0.12632	0.12729	0.12772	0.12732	0.12669	0.12824	0.12567	0.1234	0.12304	0.1231
758	0.1146	0.11467	0.11403	0.11493	0.11549	0.1161	0.11437	0.12177	0.12578	0.11545	0.11841	0.12517	0.13105	0.13256	0.1291	0.11472	0.1158	0.11551	0.12112	0.11817	0.12543	0.12865	0.12922	0.11911	0.11823	0.11939	0.13006	0.1315	0.13115	0.13195	0.14135	0.12836	0.1171	0.11393	0.11774	0.11595	0.11608	0.11881	0.13026	0.12927	0.13025	0.13073	0.13027	0.12961	0.13128	0.12854	0.1262	0.1258	0.12592
759	0.11719	0.11725	0.11659	0.11753	0.11812	0.11872	0.11691	0.12451	0.12872	0.11802	0.12108	0.12798	0.13418	0.13578	0.13211	0.11728	0.11839	0.11808	0.12386	0.12084	0.12828	0.13164	0.13223	0.12177	0.12089	0.12206	0.13307	0.13461	0.13422	0.13512	0.14494	0.13132	0.11975	0.11647	0.12042	0.11858	0.1187	0.12144	0.13331	0.13231	0.1333	0.13383	0.13332	0.13261	0.13442	0.13149	0.12908	0.12863	0.12882
760	0.11982	0.11987	0.11919	0.1202	0.1208	0.1214	0.11949	0.12732	0.13176	0.12064	0.12381	0.13086	0.13741	0.13912	0.13522	0.11989	0.12104	0.1207	0.12666	0.12356	0.13121	0.13472	0.13533	0.12449	0.1236	0.1248	0.13617	0.13783	0.1374	0.13839	0.14869	0.13436	0.12246	0.11906	0.12316	0.12125	0.12138	0.12412	0.13647	0.13545	0.13645	0.13703	0.13646	0.13571	0.13766	0.13453	0.13203	0.13153	0.1318
761	0.12252	0.12256	0.12186	0.12293	0.12356	0.12415	0.12213	0.13021	0.1349	0.12332	0.12662	0.13384	0.14079	0.14261	0.13846	0.12256	0.12376	0.12339	0.12955	0.12636	0.13424	0.13792	0.13855	0.12729	0.12639	0.1276	0.1394	0.14119	0.1407	0.14181	0.15265	0.13752	0.12525	0.12172	0.12597	0.124	0.12413	0.12688	0.13975	0.13871	0.13974	0.14037	0.13973	0.13892	0.14105	0.13769	0.13509	0.13454	0.13488
762	0.12529	0.12532	0.12459	0.12573	0.12639	0.12697	0.12484	0.13318	0.13816	0.12607	0.12951	0.13691	0.1443	0.14626	0.14182	0.12529	0.12654	0.12614	0.13252	0.12924	0.13737	0.14124	0.14189	0.13016	0.12926	0.13049	0.14275	0.14468	0.14414	0.14537	0.15683	0.1408	0.12811	0.12443	0.12887	0.12683	0.12695	0.12971	0.14316	0.14211	0.14315	0.14385	0.14313	0.14227	0.14458	0.14096	0.13826	0.13764	0.13808
763	0.12814	0.12815	0.12739	0.12861	0.1293	0.12987	0.12761	0.13626	0.14155	0.12888	0.13248	0.14009	0.14797	0.15009	0.14531	0.12809	0.1294	0.12897	0.13559	0.1322	0.14062	0.1447	0.14537	0.13312	0.13221	0.13346	0.14623	0.14833	0.14773	0.1491	0.16124	0.1442	0.13105	0.12721	0.13185	0.12972	0.12985	0.13261	0.14672	0.14564	0.1467	0.14748	0.14668	0.14574	0.14826	0.14437	0.14154	0.14086	0.14139
764	0.13106	0.13106	0.13028	0.13158	0.13231	0.13286	0.13045	0.13944	0.14509	0.13178	0.13555	0.14339	0.15184	0.15412	0.14898	0.13097	0.13235	0.13188	0.13877	0.13526	0.14399	0.14831	0.14902	0.13617	0.13525	0.13654	0.14989	0.15217	0.1515	0.15303	0.16597	0.14776	0.13409	0.13007	0.13493	0.13272	0.13284	0.13561	0.15046	0.14935	0.15044	0.1513	0.1504	0.14939	0.15214	0.14792	0.14496	0.1442	0.14485
765	0.13408	0.13406	0.13325	0.13465	0.13542	0.13595	0.13338	0.14274	0.14879	0.13477	0.13873	0.14683	0.1559	0.15839	0.15282	0.13394	0.13539	0.13488	0.14206	0.13842	0.14751	0.15211	0.15284	0.13933	0.1384	0.13972	0.15372	0.15621	0.15546	0.15717	0.17104	0.15149	0.13724	0.13301	0.13812	0.13581	0.13593	0.13871	0.15438	0.15324	0.15436	0.15532	0.1543	0.15321	0.15624	0.15165	0.14853	0.14768	0.14846
766	0.13721	0.13717	0.13631	0.13782	0.13863	0.13916	0.1364	0.14618	0.15268	0.13786	0.14203	0.15043	0.16021	0.16291	0.15687	0.13701	0.13853	0.13798	0.1455	0.14171	0.15119	0.15609	0.15687	0.14261	0.14167	0.14302	0.15776	0.16049	0.15965	0.16156	0.17649	0.1554	0.1405	0.13605	0.14143	0.13901	0.13913	0.14191	0.15852	0.15735	0.1585	0.15957	0.15843	0.15723	0.16057	0.15556	0.15227	0.15132	0.15224
767	0.14045	0.14038	0.13949	0.14112	0.14198	0.14248	0.13953	0.14978	0.15678	0.14106	0.14547	0.15419	0.16479	0.16776	0.16116	0.14018	0.1418	0.14119	0.14908	0.14513	0.15506	0.16032	0.16113	0.14602	0.14507	0.14645	0.16205	0.16504	0.1641	0.16625	0.18243	0.15954	0.14389	0.13919	0.14488	0.14234	0.14246	0.14525	0.16292	0.1617	0.1629	0.16409	0.16281	0.1615	0.16518	0.1597	0.1562	0.15515	0.15623
768	0.14381	0.14373	0.14279	0.14455	0.14547	0.14595	0.14277	0.15355	0.16113	0.14438	0.14906	0.15816	0.16969	0.17296	0.16572	0.14348	0.14519	0.14452	0.15284	0.1487	0.15914	0.1648	0.16566	0.14958	0.14862	0.15004	0.1666	0.16991	0.16886	0.17127	0.18893	0.16393	0.14743	0.14245	0.14849	0.1458	0.14592	0.14872	0.16761	0.16634	0.16758	0.16891	0.16747	0.16603	0.17012	0.16409	0.16036	0.15918	0.16044
769	0.14733	0.14721	0.14622	0.14814	0.14911	0.14957	0.14613	0.15752	0.16576	0.14784	0.15283	0.16235	0.17497	0.17858	0.17061	0.14691	0.14873	0.148	0.1568	0.15244	0.16346	0.16959	0.17051	0.15331	0.15234	0.15381	0.17149	0.17516	0.17397	0.17669	0.19612	0.16862	0.15114	0.14584	0.15227	0.14942	0.14955	0.15236	0.17264	0.17131	0.17261	0.1741	0.17248	0.17088	0.17544	0.16878	0.16477	0.16345	0.16492
770	0.151	0.15085	0.1498	0.15189	0.15294	0.15337	0.14964	0.16171	0.1707	0.15145	0.15678	0.1668	0.18067	0.1847	0.17585	0.1505	0.15244	0.15163	0.16097	0.15637	0.16806	0.17473	0.17572	0.15723	0.15624	0.15776	0.17674	0.18083	0.17948	0.18256	0.20411	0.17364	0.15503	0.14938	0.15625	0.15322	0.15334	0.15617	0.17807	0.17665	0.17803	0.17971	0.17788	0.1761	0.1812	0.1738	0.16948	0.16799	0.1697
771	0.15486	0.15467	0.15356	0.15584	0.15696	0.15736	0.15332	0.16615	0.17602	0.15524	0.16096	0.17155	0.18688	0.1914	0.18153	0.15425	0.15633	0.15544	0.1654	0.16051	0.17297	0.18028	0.18136	0.16137	0.16036	0.16194	0.18243	0.18702	0.18549	0.18899	0.21311	0.17906	0.15914	0.15308	0.16045	0.15722	0.15734	0.16018	0.18396	0.18244	0.18392	0.18582	0.18374	0.18175	0.18748	0.17922	0.17452	0.17285	0.17482
772	0.15892	0.1587	0.15751	0.16001	0.16122	0.16158	0.15717	0.1709	0.18178	0.15923	0.16539	0.17666	0.19371	0.19882	0.18774	0.1582	0.16044	0.15946	0.17012	0.16491	0.17828	0.18633	0.18752	0.16576	0.16473	0.16638	0.18866	0.19383	0.19209	0.19609	0.22341	0.18495	0.16349	0.15696	0.16491	0.16144	0.16156	0.16443	0.19042	0.18877	0.19038	0.19253	0.19016	0.18792	0.19441	0.18513	0.17998	0.1781	0.18037
773	0.16323	0.16295	0.16168	0.16442	0.16575	0.16607	0.16124	0.17599	0.18805	0.16344	0.17012	0.18218	0.20128	0.20709	0.19455	0.16237	0.16479	0.1637	0.17519	0.1696	0.18402	0.19297	0.19429	0.17043	0.16937	0.17111	0.19552	0.20139	0.1994	0.20398	0.23529	0.19141	0.16812	0.16106	0.16966	0.16593	0.16604	0.16894	0.19755	0.19573	0.1975	0.19995	0.19725	0.19471	0.20209	0.1916	0.18591	0.18378	0.18641
774	0.1678	0.16748	0.1661	0.16913	0.17057	0.17085	0.16554	0.18149	0.19495	0.16792	0.17518	0.1882	0.20975	0.21642	0.20212	0.16679	0.16942	0.16821	0.18065	0.17462	0.1903	0.20032	0.2018	0.17545	0.17435	0.17619	0.20317	0.20988	0.20759	0.21287	0.24925	0.19856	0.17307	0.16541	0.17476	0.17071	0.17083	0.17377	0.20551	0.20348	0.20546	0.20826	0.20517	0.20226	0.21072	0.19876	0.19242	0.19	0.19303
775	0.1727	0.17231	0.17082	0.17418	0.17576	0.17598	0.17012	0.18748	0.20259	0.1727	0.18065	0.19482	0.21935	0.22707	0.21061	0.17152	0.17438	0.17304	0.1866	0.18003	0.19723	0.20855	0.21024	0.18086	0.17971	0.18167	0.21179	0.21952	0.21688	0.223	0.26595	0.20656	0.1784	0.17003	0.18026	0.17585	0.17597	0.17897	0.21451	0.21218	0.21444	0.21768	0.21412	0.21075	0.22053	0.20679	0.19964	0.19688	0.20038
776	0.17796	0.1775	0.17589	0.17962	0.18136	0.18153	0.17502	0.19405	0.21115	0.17783	0.1866	0.20218	0.23037	0.23942	0.22027	0.17658	0.17972	0.17822	0.19312	0.18591	0.20495	0.21789	0.21984	0.18674	0.18554	0.18765	0.22164	0.23065	0.22757	0.23473	0.28632	0.21564	0.18418	0.17499	0.18625	0.1814	0.18152	0.1846	0.2248	0.22209	0.22473	0.22848	0.22436	0.22043	0.23183	0.2159	0.20774	0.20456	0.20862
777	0.18366	0.18312	0.18135	0.18553	0.18746	0.18756	0.18031	0.20134	0.22085	0.18339	0.19311	0.21046	0.2432	0.25392	0.2314	0.18206	0.18552	0.18384	0.20033	0.19234	0.21366	0.22862	0.23091	0.19319	0.19191	0.1942	0.23307	0.24367	0.24006	0.24849	0.31169	0.22607	0.1905	0.18033	0.1928	0.18744	0.18756	0.19077	0.23676	0.23352	0.23667	0.24107	0.23627	0.23163	0.24505	0.22638	0.21694	0.21327	0.21798
778	0.18989	0.18925	0.1873	0.19199	0.19414	0.19418	0.18604	0.2095	0.23197	0.18945	0.20032	0.21991	0.25838	0.27125	0.24443	0.18802	0.19186	0.18997	0.20841	0.19946	0.22362	0.24115	0.2439	0.20033	0.19895	0.20148	0.24658	0.2592	0.25493	0.26495	0.34402	0.23827	0.19746	0.18614	0.20005	0.19406	0.1942	0.19757	0.2509	0.24693	0.25079	0.25598	0.25036	0.24481	0.26079	0.23865	0.22755	0.22327	0.22876
779	0.19674	0.19599	0.19383	0.19913	0.20155	0.20151	0.19232	0.21876	0.24491	0.19612	0.20838	0.23085	0.27668	0.29235	0.25999	0.19457	0.19887	0.19673	0.21756	0.2074	0.2352	0.25606	0.25942	0.20834	0.20681	0.20963	0.26287	0.2781	0.27301	0.28504	0.3861	0.25282	0.20521	0.19249	0.20814	0.2014	0.20155	0.20518	0.26793	0.26293	0.26781	0.27399	0.26736	0.26062	0.27991	0.25331	0.24001	0.23499	0.2414
780	0.20437	0.20348	0.20105	0.20709	0.20982	0.20971	0.19927	0.22941	0.26022	0.20355	0.21751	0.24377	0.29919	0.31856	0.27893	0.20184	0.20669	0.20426	0.22809	0.21638	0.24891	0.27416	0.27839	0.21742	0.21569	0.21891	0.28296	0.30164	0.29548	0.3101	0.44179	0.27057	0.21394	0.19952	0.2173	0.20962	0.20979	0.21378	0.28893	0.28243	0.28878	0.29622	0.28834	0.28003	0.30364	0.27121	0.25494	0.249	0.25651
781	0.21294	0.2119	0.20914	0.21606	0.21919	0.21901	0.20703	0.24189	0.27864	0.2119	0.228	0.25935	0.3275	0.35179	0.30254	0.21	0.21553	0.21275	0.24041	0.22669	0.26549	0.29667	0.30212	0.22789	0.22588	0.22962	0.3084	0.33168	0.32416	0.34212	0.51565	0.2928	0.2239	0.20738	0.2278	0.21894	0.21913	0.22369	0.31543	0.30675	0.31525	0.32431	0.31488	0.30446	0.33383	0.29364	0.27329	0.26616	0.27502
782	0.22271	0.22147	0.21832	0.22631	0.22993	0.22968	0.21582	0.25677	0.30126	0.22144	0.24025	0.27861	0.36386	0.39472	0.33272	0.21928	0.22566	0.22246	0.2551	0.2387	0.28604	0.32537	0.3326	0.24018	0.23777	0.24223	0.34149	0.37098	0.36171	0.38398	0.61076	0.32144	0.23545	0.21629	0.24003	0.22966	0.22989	0.23528	0.34975	0.33782	0.34953	0.36067	0.34934	0.33603	0.37313	0.32256	0.29645	0.28779	0.29828
783	0.234	0.23255	0.22889	0.2382	0.24244	0.24215	0.22594	0.27492	0.32963	0.23253	0.25484	0.30309	0.41151	0.45101	0.37229	0.23002	0.23748	0.23375	0.27303	0.25299	0.31221	0.363	0.37284	0.25491	0.25191	0.25738	0.38577	0.42362	0.41213	0.43981	0.72211	0.35945	0.24908	0.22654	0.25454	0.2422	0.24249	0.24918	0.39534	0.37852	0.39506	0.40884	0.39524	0.37798	0.42547	0.36098	0.32661	0.31593	0.32839
784	0.24729	0.24558	0.24126	0.25223	0.25726	0.25698	0.23779	0.29761	0.36599	0.24566	0.27262	0.3351	0.4747	0.52488	0.42538	0.24268	0.25154	0.24717	0.2955	0.27036	0.34656	0.41359	0.42728	0.27302	0.26912	0.27604	0.44634	0.49504	0.48089	0.51487	0.82802	0.41135	0.26551	0.23855	0.27213	0.25715	0.25754	0.26625	0.4571	0.43304	0.45674	0.47373	0.45762	0.43509	0.49602	0.41348	0.36719	0.35384	0.36863
785	0.26323	0.26122	0.25604	0.26911	0.27517	0.27501	0.25198	0.32672	0.41349	0.26158	0.29485	0.37816	0.55784	0.61902	0.49749	0.25793	0.26866	0.26346	0.32445	0.29204	0.39293	0.48274	0.50192	0.29591	0.29063	0.29972	0.52969	0.59071	0.57394	0.61357	0.89674	0.48342	0.2858	0.25291	0.29397	0.27539	0.27592	0.28785	0.54101	0.50689	0.54057	0.56089	0.54258	0.51361	0.58992	0.48644	0.42346	0.40654	0.42399
786	0.28279	0.28043	0.27409	0.28988	0.29731	0.29745	0.26938	0.36513	0.47634	0.2814	0.32343	0.43722	0.66175	0.72867	0.59389	0.27677	0.29007	0.28381	0.36286	0.31991	0.45683	0.57653	0.60255	0.32578	0.31834	0.33072	0.64034	0.70991	0.69216	0.73246	0.91415	0.58231	0.31153	0.27052	0.32183	0.29821	0.29898	0.31607	0.65075	0.60521	0.65026	0.67246	0.65368	0.6189	0.70656	0.58658	0.50275	0.48128	0.50142
787	0.30742	0.30469	0.29673	0.31609	0.32536	0.32617	0.29135	0.41706	0.55902	0.30687	0.36131	0.51811	0.77488	0.83293	0.71293	0.30075	0.31766	0.31	0.41508	0.35689	0.54472	0.69552	0.72686	0.36606	0.35521	0.37265	0.7696	0.83236	0.81787	0.84794	0.89399	0.70769	0.34513	0.29274	0.35841	0.32759	0.32874	0.35413	0.7769	0.72553	0.77645	0.79596	0.78076	0.74598	0.8271	0.71322	0.61222	0.58582	0.60783
788	0.33931	0.33622	0.32599	0.35005	0.36187	0.36398	0.32001	0.48821	0.66272	0.34069	0.41288	0.62361	0.86772	0.90064	0.83271	0.33232	0.35443	0.34489	0.48687	0.40747	0.65878	0.82062	0.84933	0.42192	0.40581	0.43095	0.88212	0.91727	0.91019	0.92149	0.85401	0.83634	0.3903	0.32171	0.40772	0.3666	0.36834	0.40665	0.88516	0.84421	0.88488	0.89575	0.88833	0.86464	0.91289	0.84173	0.74768	0.7189	0.74014
789	0.38181	0.37847	0.36499	0.39531	0.41063	0.41509	0.35871	0.58403	0.77675	0.38715	0.48417	0.74382	0.91233	0.91805	0.91319	0.37529	0.40501	0.39289	0.58339	0.47808	0.78439	0.91027	0.92633	0.5003	0.47668	0.51269	0.93723	0.94117	0.94085	0.93701	0.80468	0.92277	0.4523	0.36082	0.47526	0.41987	0.42249	0.4793	0.93748	0.92062	0.93743	0.93876	0.93876	0.93177	0.93978	0.92575	0.87521	0.85161	0.86775
790	0.43993	0.43667	0.41859	0.45703	0.477	0.48541	0.41267	0.70268	0.87198	0.45258	0.58119	0.84814	0.90923	0.89779	0.93387	0.43558	0.47616	0.46049	0.70216	0.57577	0.88343	0.93793	0.94037	0.60712	0.57501	0.62312	0.93347	0.91944	0.92247	0.91199	0.75154	0.94385	0.53746	0.41536	0.56685	0.49389	0.49765	0.57623	0.93308	0.9368	0.93317	0.92921	0.93285	0.93725	0.9208	0.9439	0.94486	0.9331	0.94191
791	0.52044	0.51788	0.49376	0.54181	0.56723	0.58116	0.48939	0.82225	0.91902	0.54482	0.70293	0.90355	0.87708	0.85735	0.91096	0.52116	0.57549	0.55547	0.82116	0.70105	0.92445	0.91786	0.91233	0.73714	0.70119	0.75434	0.8966	0.87526	0.87948	0.86713	0.6974	0.91886	0.64932	0.493	0.68323	0.59535	0.6001	0.69347	0.89654	0.91106	0.89668	0.89085	0.89553	0.90487	0.87849	0.91714	0.94733	0.94542	0.94926
792	0.62928	0.62822	0.59804	0.65427	0.68364	0.70236	0.59655	0.9031	0.91688	0.66755	0.8274	0.90656	0.83075	0.8075	0.8666	0.63845	0.704	0.68069	0.90197	0.83171	0.91426	0.87424	0.86477	0.85892	0.83244	0.87144	0.84507	0.82132	0.82574	0.8136	0.64362	0.87227	0.7775	0.60176	0.80788	0.72318	0.72766	0.80953	0.84561	0.86524	0.84576	0.83958	0.8442	0.85536	0.82587	0.86967	0.91141	0.91426	0.91623
793	0.7608	0.7615	0.73044	0.785	0.81138	0.82842	0.73158	0.92514	0.88461	0.80425	0.91246	0.87651	0.77816	0.75385	0.81282	0.77796	0.83813	0.81719	0.92492	0.9214	0.87621	0.82036	0.80893	0.92794	0.92177	0.93198	0.78746	0.76364	0.76779	0.7568	0.59085	0.81641	0.88641	0.73926	0.90225	0.8517	0.85354	0.88933	0.78873	0.81076	0.78889	0.78305	0.78707	0.79864	0.7692	0.81337	0.85914	0.86399	0.86558
794	0.88146	0.88262	0.86232	0.897	0.91042	0.91681	0.86247	0.90357	0.8377	0.90888	0.93557	0.83006	0.72337	0.69926	0.75545	0.89742	0.92851	0.91712	0.90438	0.94462	0.82533	0.76252	0.7501	0.93393	0.94409	0.93168	0.72786	0.70505	0.70868	0.6993	0.53932	0.75706	0.93803	0.87219	0.93729	0.93368	0.93191	0.91404	0.72995	0.75316	0.73009	0.72494	0.72809	0.73941	0.71148	0.7538	0.80026	0.80575	0.80772
795	0.94506	0.94496	0.94209	0.94874	0.94753	0.94217	0.93775	0.86005	0.78437	0.94543	0.91317	0.77604	0.66838	0.64508	0.6972	0.9502	0.94936	0.94762	0.86153	0.92023	0.76893	0.70365	0.69068	0.90136	0.91897	0.8962	0.66808	0.64683	0.64981	0.64227	0.48902	0.69683	0.93259	0.94681	0.9224	0.94877	0.94504	0.89564	0.6711	0.69497	0.67122	0.66691	0.66901	0.67979	0.65406	0.69344	0.73915	0.74461	0.74738
796	0.94478	0.94325	0.95184	0.9411	0.93197	0.92024	0.94395	0.80659	0.72874	0.927	0.86843	0.71891	0.61413	0.59195	0.63932	0.93991	0.92232	0.9255	0.80844	0.87356	0.71059	0.64507	0.63177	0.8513	0.87183	0.84495	0.609	0.58956	0.59183	0.58623	0.43985	0.6369	0.89516	0.95063	0.88132	0.91963	0.91551	0.85399	0.61301	0.63736	0.61312	0.60974	0.61067	0.62076	0.59755	0.63345	0.67775	0.68282	0.68664
797	0.90803	0.90562	0.91849	0.90152	0.88958	0.87521	0.90911	0.74908	0.67283	0.88205	0.81379	0.66087	0.56102	0.54007	0.58239	0.89771	0.87374	0.87886	0.7511	0.8174	0.65198	0.58739	0.57387	0.79379	0.81534	0.78702	0.55098	0.53348	0.535	0.53137	0.39174	0.57782	0.84343	0.91392	0.82851	0.87063	0.86662	0.80129	0.55605	0.58084	0.55614	0.55374	0.55343	0.56276	0.54218	0.57434	0.61694	0.62141	0.62644
798	0.85556	0.85262	0.86676	0.8482	0.83554	0.82006	0.85668	0.69028	0.61756	0.82579	0.75514	0.60297	0.50914	0.48944	0.52662	0.84224	0.81609	0.82187	0.69232	0.75754	0.59391	0.53086	0.51716	0.73343	0.75521	0.72662	0.49418	0.47862	0.47942	0.4777	0.34472	0.51981	0.78565	0.86039	0.77081	0.81327	0.80947	0.74366	0.50034	0.52555	0.50041	0.49897	0.4974	0.50596	0.48798	0.51634	0.55708	0.56085	0.56718
799	0.797	0.79364	0.80796	0.78962	0.77709	0.76111	0.79737	0.63158	0.56334	0.76524	0.69535	0.54578	0.45845	0.43995	0.47205	0.78174	0.75522	0.76103	0.63353	0.69676	0.53674	0.47553	0.4617	0.67246	0.69418	0.66579	0.43867	0.425	0.42511	0.42517	0.29908	0.46297	0.72591	0.80045	0.71163	0.753	0.74942	0.68424	0.44589	0.47149	0.44594	0.44542	0.44262	0.45042	0.43492	0.45954	0.49836	0.50137	0.50903
800	0.73623	0.73249	0.74644	0.72927	0.71729	0.70102	0.73537	0.57357	0.51027	0.70328	0.63567	0.48952	0.40887	0.3915	0.41869	0.7195	0.69349	0.69901	0.57534	0.63621	0.48062	0.42143	0.40751	0.61183	0.63337	0.60537	0.38456	0.37269	0.3722	0.37383	0.25549	0.40738	0.66589	0.73809	0.6524	0.69208	0.68869	0.62445	0.39273	0.41863	0.39277	0.39309	0.38915	0.39622	0.38301	0.40405	0.44085	0.44313	0.45203
801	0.6751	0.67099	0.68433	0.66878	0.65753	0.64105	0.67272	0.51654	0.45833	0.64126	0.57664	0.43437	0.36043	0.34413	0.36665	0.65709	0.63201	0.63707	0.51804	0.57641	0.42564	0.36868	0.35478	0.55197	0.5733	0.54576	0.33217	0.32199	0.32101	0.32393	0.21506	0.3533	0.60638	0.67527	0.59379	0.6315	0.62828	0.565	0.34109	0.36703	0.34111	0.34214	0.33726	0.3436	0.33248	0.35012	0.38474	0.38632	0.39629
802	0.61459	0.61007	0.62273	0.609	0.59855	0.58183	0.61048	0.46064	0.40748	0.57989	0.51856	0.38051	0.31334	0.29815	0.31625	0.59532	0.57132	0.57584	0.46175	0.5176	0.37196	0.31762	0.30398	0.49312	0.51423	0.48718	0.28214	0.27356	0.27225	0.27607	0.17913	0.30128	0.54775	0.61297	0.5361	0.57178	0.56871	0.50628	0.29147	0.31699	0.29148	0.29305	0.28751	0.29312	0.28387	0.29833	0.33041	0.33138	0.3421
803	0.55508	0.55014	0.56209	0.55027	0.54062	0.52362	0.54913	0.40597	0.35777	0.51949	0.46154	0.32834	0.26819	0.25424	0.26822	0.53453	0.51167	0.51561	0.40661	0.4599	0.32	0.269	0.25596	0.43544	0.45629	0.42978	0.23557	0.22853	0.22705	0.23132	0.14893	0.25232	0.49017	0.5516	0.47945	0.51313	0.51019	0.44853	0.24483	0.2692	0.24483	0.24673	0.2409	0.24575	0.2382	0.24968	0.27866	0.27913	0.29012
804	0.4967	0.49132	0.50256	0.49266	0.48381	0.46652	0.48886	0.35281	0.30952	0.46023	0.40571	0.27859	0.22599	0.21353	0.22373	0.47488	0.45316	0.45654	0.35288	0.40344	0.27055	0.22402	0.21207	0.37915	0.39963	0.37379	0.19393	0.18838	0.18691	0.19115	0.12505	0.20788	0.43371	0.49135	0.4239	0.45561	0.45279	0.39203	0.20256	0.22482	0.20255	0.20455	0.19887	0.20292	0.19693	0.20564	0.23077	0.23088	0.24152
805	0.43953	0.43372	0.44426	0.43622	0.42814	0.41061	0.42985	0.30166	0.26341	0.40229	0.35134	0.23241	0.18807	0.17742	0.1843	0.41652	0.39598	0.39882	0.30114	0.34852	0.22488	0.18422	0.17387	0.32474	0.34459	0.31971	0.1587	0.15455	0.15325	0.15705	0.10723	0.1696	0.37851	0.43233	0.36961	0.39934	0.39665	0.33723	0.16618	0.18535	0.16616	0.16804	0.16295	0.16615	0.16162	0.16781	0.18841	0.1883	0.19791
806	0.38371	0.37753	0.38736	0.38108	0.37375	0.35614	0.3724	0.25348	0.22058	0.34607	0.29903	0.19132	0.15581	0.14718	0.15133	0.35977	0.3405	0.34285	0.25239	0.2958	0.18457	0.15102	0.14263	0.27307	0.29185	0.26846	0.13077	0.12786	0.12679	0.12993	0.094554	0.13871	0.325	0.37482	0.31703	0.34462	0.34208	0.28494	0.13679	0.15224	0.13677	0.13838	0.13415	0.13655	0.13329	0.13738	0.15315	0.15294	0.16096
807	0.32965	0.32323	0.33228	0.32761	0.32102	0.30366	0.31709	0.20963	0.1825	0.29234	0.24987	0.15677	0.13	0.12342	0.1255	0.30529	0.28749	0.2894	0.20812	0.2464	0.15105	0.12509	0.11871	0.22553	0.24263	0.22145	0.10999	0.10808	0.10726	0.10969	0.085878	0.1154	0.27401	0.31937	0.26703	0.29213	0.28978	0.23646	0.11454	0.12624	0.11453	0.11581	0.11251	0.11421	0.11202	0.11447	0.12575	0.12553	0.13174
808	0.27811	0.27167	0.27983	0.27657	0.27077	0.25419	0.26494	0.17171	0.15054	0.24233	0.20539	0.12954	0.11057	0.10581	0.10649	0.25417	0.23821	0.23973	0.16999	0.20195	0.12497	0.10606	0.10144	0.18383	0.19854	0.18042	0.095322	0.094156	0.093543	0.095366	0.080171	0.098804	0.22688	0.26698	0.22097	0.24303	0.24093	0.19343	0.098619	0.10705	0.098609	0.099582	0.097125	0.098276	0.09689	0.098184	0.10581	0.1056	0.11012
809	0.23037	0.22423	0.23134	0.22926	0.22431	0.20921	0.21745	0.1409	0.12541	0.19772	0.1673	0.10938	0.096675	0.093376	0.093156	0.20802	0.19436	0.19554	0.1392	0.16415	0.1059	0.092747	0.089515	0.14948	0.16129	0.14681	0.085352	0.084712	0.084257	0.085617	0.076638	0.087466	0.1853	0.21915	0.18057	0.19896	0.1972	0.15742	0.087686	0.093565	0.087678	0.088409	0.08661	0.087356	0.086561	0.087068	0.091983	0.091814	0.09497
810	0.18813	0.18265	0.1885	0.18735	0.18334	0.17045	0.17639	0.11745	0.10681	0.16022	0.13678	0.09516	0.087111	0.084918	0.084136	0.16859	0.15762	0.15849	0.11595	0.13411	0.092588	0.083761	0.081554	0.12305	0.13188	0.12109	0.078809	0.078537	0.078198	0.079219	0.074693	0.079975	0.15083	0.17768	0.14729	0.16165	0.16025	0.12925	0.080436	0.084434	0.080429	0.08098	0.079671	0.080126	0.079755	0.079732	0.082733	0.082596	0.08475
811	0.15295	0.14841	0.15292	0.15244	0.1494	0.13917	0.14312	0.10058	0.093683	0.13077	0.11389	0.085508	0.080781	0.0794	0.078263	0.1371	0.12888	0.12948	0.099346	0.11179	0.083628	0.077921	0.076456	0.10394	0.11016	0.10259	0.07473	0.074719	0.074464	0.07524	0.073907	0.075239	0.12415	0.14402	0.12168	0.13212	0.1311	0.10856	0.075844	0.078481	0.075838	0.076257	0.075308	0.075554	0.075489	0.075103	0.076761	0.076649	0.078087
812	0.12559	0.12211	0.12535	0.12529	0.12314	0.11557	0.11799	0.088972	0.084784	0.10916	0.097697	0.079186	0.076809	0.076022	0.074652	0.11363	0.10785	0.10824	0.087994	0.096094	0.077816	0.074339	0.073411	0.090775	0.094953	0.089874	0.07242	0.072596	0.072401	0.073001	0.07396	0.072467	0.10478	0.11854	0.10317	0.11029	0.10959	0.094117	0.073161	0.07481	0.073156	0.07348	0.072794	0.072887	0.073045	0.072408	0.073115	0.073023	0.073949
813	0.10567	0.10316	0.10533	0.10552	0.1041	0.098802	0.10012	0.081251	0.078978	0.09411	0.086696	0.075255	0.07455	0.074198	0.072674	0.097114	0.093248	0.09349	0.08049	0.085494	0.074259	0.072384	0.071845	0.08201	0.084717	0.081433	0.071387	0.071696	0.071544	0.072018	0.074623	0.071109	0.091387	0.10041	0.090401	0.095005	0.094562	0.084407	0.071856	0.072787	0.071852	0.072107	0.071614	0.071595	0.071916	0.071103	0.071131	0.071054	0.071613
814	0.09188	0.090126	0.091517	0.091824	0.090946	0.087376	0.087965	0.076323	0.075406	0.084019	0.079465	0.073047	0.073538	0.073503	0.071877	0.085954	0.083473	0.083609	0.075735	0.078563	0.072325	0.071605	0.071348	0.076377	0.078046	0.076029	0.071274	0.07168	0.071559	0.071943	0.075726	0.070767	0.082451	0.088083	0.081902	0.084717	0.084451	0.078095	0.071547	0.071956	0.071543	0.071748	0.071396	0.071296	0.071738	0.0708	0.070343	0.070278	0.070572
815	0.082661	0.081467	0.082303	0.082672	0.082173	0.079844	0.079949	0.073401	0.073451	0.077465	0.074916	0.072085	0.073431	0.073628	0.071933	0.078647	0.077137	0.077202	0.072946	0.074231	0.071564	0.071675	0.071623	0.072971	0.0739	0.072785	0.071825	0.072301	0.072201	0.072523	0.077148	0.071158	0.076694	0.079954	0.076449	0.07801	0.077868	0.074199	0.071956	0.071987	0.071952	0.072123	0.071872	0.071713	0.072244	0.071217	0.070416	0.070358	0.070463
816	0.076714	0.075919	0.076369	0.076769	0.076535	0.075085	0.074864	0.071927	0.072668	0.073412	0.072283	0.072021	0.073979	0.074344	0.072602	0.074063	0.073238	0.073254	0.071574	0.071758	0.071647	0.072355	0.072451	0.07116	0.07156	0.071091	0.07285	0.073378	0.073293	0.073571	0.0788	0.072071	0.073201	0.074796	0.07317	0.073846	0.073791	0.072036	0.07288	0.072638	0.072876	0.073022	0.072845	0.072642	0.073239	0.072149	0.071103	0.07105	0.071021
817	0.073086	0.072578	0.072754	0.073173	0.073125	0.072305	0.071857	0.071497	0.072733	0.071143	0.071027	0.072604	0.075	0.075488	0.073714	0.071415	0.071078	0.071059	0.071222	0.070618	0.072338	0.073474	0.073676	0.070497	0.070517	0.070511	0.074218	0.074784	0.074709	0.074957	0.080619	0.07336	0.071329	0.07174	0.07145	0.071495	0.071502	0.071118	0.074175	0.073736	0.074171	0.0743	0.074175	0.07394	0.074588	0.073452	0.07223	0.072181	0.072057
818	0.071123	0.07082	0.070803	0.071232	0.071316	0.070947	0.070342	0.07182	0.07341	0.070155	0.070764	0.073652	0.076362	0.07694	0.075143	0.070156	0.070169	0.070125	0.071604	0.070439	0.073465	0.074909	0.075188	0.070658	0.070406	0.070732	0.07583	0.076425	0.076356	0.076585	0.08256	0.074919	0.070625	0.07019	0.070854	0.070447	0.070499	0.071095	0.075736	0.075156	0.075732	0.07585	0.075762	0.075504	0.076191	0.075019	0.073674	0.073625	0.073436
819	0.070355	0.070201	0.070045	0.070481	0.070659	0.070612	0.069896	0.072684	0.074528	0.070088	0.071212	0.075034	0.077971	0.078616	0.0768	0.069895	0.070157	0.070096	0.072512	0.070949	0.074905	0.076571	0.076904	0.07141	0.070965	0.071527	0.077618	0.078235	0.07817	0.078388	0.084591	0.076669	0.070759	0.069722	0.071064	0.070337	0.07042	0.071715	0.077488	0.076807	0.077484	0.077595	0.077533	0.077256	0.077975	0.076775	0.075343	0.075294	0.075061
820	0.070446	0.070398	0.070144	0.070583	0.070829	0.071012	0.070219	0.073936	0.075963	0.070679	0.072171	0.076654	0.079758	0.080452	0.078621	0.070348	0.070789	0.070715	0.073798	0.071952	0.076569	0.078394	0.078767	0.072585	0.072003	0.072732	0.079531	0.080168	0.080103	0.080316	0.086691	0.078557	0.071494	0.070029	0.071854	0.070898	0.071004	0.072793	0.079377	0.078625	0.079373	0.079481	0.079435	0.079145	0.07989	0.078666	0.077173	0.077122	0.07686
821	0.071152	0.07118	0.070856	0.071298	0.071591	0.071938	0.07109	0.075467	0.077627	0.071742	0.073495	0.078446	0.081675	0.082408	0.080562	0.071314	0.071881	0.071798	0.075355	0.073309	0.078395	0.080336	0.080737	0.074063	0.073384	0.074232	0.081536	0.082189	0.082124	0.082337	0.088846	0.080545	0.07266	0.07089	0.073058	0.07194	0.072061	0.074201	0.081367	0.080563	0.081363	0.08147	0.081434	0.081132	0.081902	0.080656	0.079118	0.079064	0.078785
822	0.072289	0.072371	0.071997	0.072442	0.072769	0.073233	0.072344	0.077194	0.079453	0.073135	0.075076	0.080359	0.083687	0.084451	0.082587	0.072636	0.073296	0.073205	0.077101	0.074913	0.080334	0.082362	0.082784	0.075752	0.075006	0.075937	0.083607	0.084277	0.084208	0.084426	0.091045	0.082603	0.074127	0.072138	0.074553	0.073319	0.073452	0.075838	0.083428	0.082589	0.083425	0.083533	0.083502	0.083191	0.083984	0.082715	0.081145	0.081087	0.080799
823	0.073735	0.073856	0.073445	0.073893	0.074246	0.074792	0.073872	0.07906	0.081397	0.074763	0.07684	0.082359	0.085769	0.08656	0.084676	0.074215	0.07494	0.074843	0.078983	0.076694	0.082356	0.08445	0.084888	0.077593	0.076799	0.07779	0.085727	0.086413	0.086341	0.086567	0.093283	0.084714	0.075811	0.073664	0.076257	0.07494	0.07508	0.07764	0.085545	0.084679	0.085541	0.085653	0.085623	0.085303	0.086119	0.084827	0.083232	0.083168	0.082879
824	0.075404	0.075552	0.075116	0.075567	0.075938	0.076542	0.075599	0.081028	0.083427	0.07656	0.078735	0.084424	0.087906	0.08872	0.086814	0.075977	0.076751	0.076648	0.080964	0.078602	0.084438	0.086587	0.087035	0.079543	0.078715	0.079748	0.087887	0.08859	0.088512	0.088749	0.095556	0.086866	0.07765	0.075389	0.078112	0.076734	0.076879	0.079559	0.087703	0.086819	0.0877	0.087816	0.087784	0.087456	0.088296	0.086978	0.085363	0.085293	0.085007
825	0.077236	0.077403	0.076949	0.077404	0.077788	0.078432	0.077469	0.083072	0.085524	0.078481	0.080729	0.086538	0.090088	0.090924	0.088992	0.077874	0.078683	0.078575	0.083018	0.080605	0.086569	0.088762	0.089219	0.081572	0.080722	0.081784	0.090079	0.0908	0.090716	0.090966	0.097864	0.089052	0.079604	0.07726	0.080077	0.078656	0.078804	0.081565	0.089898	0.088999	0.089894	0.090017	0.08998	0.089643	0.090509	0.089163	0.087531	0.087453	0.087174
826	0.079187	0.079366	0.078899	0.079359	0.079752	0.080423	0.079443	0.085172	0.087674	0.080492	0.082794	0.088692	0.092309	0.093167	0.091203	0.079868	0.080703	0.08059	0.085128	0.082676	0.088737	0.09097	0.091435	0.083662	0.082797	0.083879	0.0923	0.093041	0.09295	0.093216	0.10021	0.091267	0.081642	0.079237	0.082123	0.08067	0.080821	0.083635	0.092124	0.091215	0.092119	0.092251	0.092206	0.091861	0.092755	0.091377	0.089728	0.089642	0.089373
827	0.081217	0.081405	0.080927	0.081394	0.081796	0.082484	0.081487	0.087314	0.089864	0.082563	0.08491	0.090877	0.094564	0.095445	0.093445	0.081928	0.082783	0.082665	0.087278	0.084796	0.090936	0.093207	0.093679	0.085794	0.084918	0.086015	0.094547	0.095311	0.095212	0.095496	0.10259	0.093508	0.083738	0.081284	0.084227	0.082749	0.082901	0.08575	0.094378	0.093461	0.094373	0.094514	0.09446	0.094106	0.09503	0.093617	0.091952	0.091856	0.0916
828	0.083303	0.083496	0.08301	0.083485	0.083894	0.084594	0.083579	0.089489	0.092089	0.084677	0.087063	0.093089	0.096852	0.097757	0.095714	0.084033	0.084906	0.084782	0.08946	0.086952	0.093162	0.095472	0.09595	0.087957	0.087075	0.088183	0.096821	0.097609	0.097501	0.097806	0.10501	0.095775	0.085877	0.08338	0.086372	0.084873	0.085026	0.087898	0.09666	0.095736	0.096655	0.096807	0.096741	0.096377	0.097335	0.095882	0.094199	0.094092	0.093852
829	0.085438	0.085634	0.085141	0.085627	0.086042	0.086749	0.085714	0.091695	0.094348	0.08683	0.089251	0.095328	0.099173	0.1001	0.098014	0.086179	0.087067	0.086938	0.091674	0.089142	0.095416	0.097766	0.098249	0.090152	0.089264	0.090381	0.099123	0.099938	0.099819	0.10015	0.10747	0.098068	0.088053	0.085519	0.088556	0.087037	0.087191	0.090078	0.098971	0.098042	0.098967	0.09913	0.099051	0.098677	0.099672	0.098173	0.096472	0.096353	0.096131
830	0.087602	0.0878	0.087301	0.087798	0.08822	0.088931	0.087874	0.093925	0.096637	0.089007	0.091464	0.097592	0.10153	0.10249	0.10034	0.088351	0.089254	0.089118	0.093911	0.091356	0.097695	0.10009	0.10058	0.092368	0.091477	0.092601	0.10145	0.1023	0.10217	0.10252	0.10997	0.10039	0.090256	0.087684	0.090766	0.089229	0.089382	0.092281	0.10131	0.10038	0.10131	0.10148	0.10139	0.101	0.10204	0.10049	0.098769	0.098637	0.098436
831	0.089798	0.089996	0.089491	0.090002	0.090431	0.091143	0.090062	0.096182	0.098957	0.091211	0.093704	0.099882	0.10392	0.10491	0.1027	0.09055	0.091467	0.091324	0.096175	0.093596	0.1	0.10244	0.10294	0.094609	0.093715	0.094846	0.10381	0.10469	0.10455	0.10493	0.11253	0.10274	0.092488	0.089877	0.093005	0.091449	0.091602	0.094508	0.10369	0.10275	0.10368	0.10387	0.10376	0.10336	0.10445	0.10284	0.10109	0.10095	0.10077
832	0.092019	0.092216	0.091705	0.092232	0.092668	0.093381	0.092272	0.098464	0.10131	0.093436	0.095968	0.1022	0.10635	0.10737	0.1051	0.092771	0.093704	0.093552	0.098465	0.09586	0.10234	0.10483	0.10533	0.096874	0.095977	0.097115	0.10621	0.10712	0.10697	0.10738	0.11514	0.10512	0.094744	0.092093	0.095269	0.093693	0.093847	0.096758	0.1061	0.10515	0.10609	0.1063	0.10617	0.10575	0.10689	0.10522	0.10345	0.10328	0.10313
833	0.094265	0.094461	0.093943	0.094488	0.094931	0.095644	0.094504	0.10077	0.1037	0.095685	0.098259	0.10455	0.10882	0.10988	0.10753	0.095015	0.095964	0.095804	0.10078	0.09815	0.1047	0.10725	0.10776	0.099164	0.098264	0.09941	0.10864	0.1096	0.10942	0.10988	0.11781	0.10754	0.097026	0.094332	0.097561	0.095963	0.096116	0.099032	0.10854	0.10759	0.10854	0.10877	0.10861	0.10818	0.10937	0.10764	0.10584	0.10565	0.10553
834	0.096541	0.096734	0.096209	0.096774	0.097227	0.097937	0.096762	0.10312	0.10613	0.09796	0.10058	0.10693	0.11134	0.11244	0.11001	0.097285	0.098253	0.098082	0.10313	0.10047	0.10711	0.10972	0.11023	0.10148	0.10058	0.10173	0.11111	0.11212	0.11193	0.11242	0.12055	0.11	0.099338	0.096597	0.099883	0.098262	0.098416	0.10133	0.11104	0.11008	0.11103	0.11128	0.1111	0.11066	0.11191	0.11009	0.10826	0.10806	0.10797
835	0.098843	0.099033	0.0985	0.099088	0.09955	0.10026	0.099044	0.10549	0.1086	0.10026	0.10293	0.10935	0.11391	0.11506	0.11253	0.099581	0.10057	0.10039	0.10552	0.10282	0.10955	0.11223	0.11275	0.10383	0.10293	0.10409	0.11364	0.11469	0.11448	0.11502	0.12337	0.1125	0.10168	0.098887	0.10224	0.10059	0.10074	0.10366	0.11358	0.11261	0.11357	0.11384	0.11364	0.11317	0.1145	0.11259	0.11073	0.1105	0.11044
836	0.10117	0.10136	0.10081	0.10143	0.1019	0.1026	0.10135	0.1079	0.11111	0.10258	0.10531	0.11181	0.11654	0.11774	0.1151	0.1019	0.10291	0.10271	0.10793	0.1052	0.11203	0.11478	0.11532	0.10621	0.1053	0.10647	0.1162	0.11732	0.11708	0.11767	0.12627	0.11505	0.10405	0.1012	0.10462	0.10294	0.1031	0.10602	0.11617	0.1152	0.11616	0.11646	0.11623	0.11574	0.11714	0.11514	0.11323	0.11298	0.11296
837	0.10353	0.10371	0.10316	0.1038	0.10428	0.10499	0.10368	0.11034	0.11367	0.10494	0.10773	0.11431	0.11923	0.12048	0.11773	0.10425	0.10528	0.10507	0.11039	0.10761	0.11456	0.1174	0.11794	0.10862	0.10771	0.10889	0.11883	0.12	0.11974	0.12039	0.12926	0.11765	0.10646	0.10354	0.10704	0.10533	0.10548	0.10842	0.11882	0.11784	0.11881	0.11914	0.11888	0.11836	0.11984	0.11774	0.11579	0.11551	0.11554
838	0.10592	0.1061	0.10553	0.10621	0.10671	0.1074	0.10604	0.11283	0.1163	0.10733	0.11019	0.11686	0.12199	0.1233	0.12042	0.10663	0.10769	0.10747	0.11289	0.11007	0.11715	0.12007	0.12062	0.11108	0.11016	0.11135	0.12152	0.12276	0.12247	0.12319	0.13235	0.12032	0.1089	0.10591	0.1095	0.10776	0.10791	0.11085	0.12154	0.12055	0.12153	0.12189	0.12159	0.12105	0.12262	0.1204	0.1184	0.11809	0.11816
839	0.10834	0.10851	0.10794	0.10865	0.10916	0.10986	0.10844	0.11537	0.11898	0.10975	0.11269	0.11947	0.12482	0.1262	0.12317	0.10904	0.11013	0.10989	0.11544	0.11256	0.11978	0.12281	0.12337	0.11357	0.11265	0.11386	0.12427	0.12559	0.12528	0.12605	0.13555	0.12304	0.11139	0.10832	0.112	0.11022	0.11037	0.11332	0.12432	0.12333	0.12431	0.12471	0.12437	0.12379	0.12547	0.12312	0.12107	0.12073	0.12085
840	0.1108	0.11097	0.11038	0.11113	0.11166	0.11235	0.11087	0.11796	0.12172	0.11221	0.11523	0.12213	0.12774	0.1292	0.12601	0.11149	0.11261	0.11236	0.11804	0.1151	0.12248	0.12562	0.1262	0.11611	0.11519	0.11641	0.1271	0.12851	0.12816	0.12901	0.13888	0.12584	0.11392	0.11076	0.11455	0.11272	0.11288	0.11583	0.12719	0.12618	0.12718	0.12761	0.12722	0.12662	0.12841	0.12591	0.1238	0.12342	0.1236
841	0.11331	0.11347	0.11287	0.11366	0.11421	0.11489	0.11334	0.1206	0.12455	0.11471	0.11783	0.12486	0.13075	0.13229	0.12892	0.11399	0.11515	0.11487	0.1207	0.1177	0.12525	0.12851	0.12911	0.1187	0.11778	0.11901	0.13001	0.13151	0.13113	0.13207	0.14236	0.12872	0.1165	0.11324	0.11716	0.11528	0.11543	0.11839	0.13014	0.12912	0.13013	0.1306	0.13017	0.12952	0.13145	0.12879	0.12661	0.12619	0.12643
842	0.11587	0.11602	0.1154	0.11624	0.11681	0.11749	0.11585	0.12331	0.12745	0.11726	0.12049	0.12766	0.13386	0.1355	0.13193	0.11653	0.11773	0.11743	0.12342	0.12035	0.12809	0.13149	0.1321	0.12135	0.12042	0.12167	0.13302	0.13462	0.1342	0.13523	0.14599	0.13169	0.11914	0.11577	0.11982	0.11789	0.11804	0.12101	0.13319	0.13215	0.13317	0.13369	0.13321	0.13252	0.13459	0.13175	0.1295	0.12903	0.12935
843	0.11848	0.11862	0.11799	0.11888	0.11947	0.12014	0.11841	0.12608	0.13044	0.11987	0.12321	0.13053	0.13709	0.13883	0.13504	0.11912	0.12036	0.12004	0.12621	0.12306	0.13102	0.13457	0.1352	0.12407	0.12312	0.1244	0.13612	0.13784	0.13737	0.13851	0.14979	0.13475	0.12183	0.11835	0.12254	0.12055	0.1207	0.12368	0.13634	0.13528	0.13632	0.1369	0.13635	0.13562	0.13785	0.1348	0.13247	0.13195	0.13235
844	0.12115	0.12129	0.12063	0.12158	0.1222	0.12286	0.12103	0.12894	0.13354	0.12253	0.126	0.1335	0.14045	0.14232	0.13826	0.12177	0.12306	0.12271	0.12909	0.12585	0.13404	0.13777	0.13842	0.12685	0.1259	0.12719	0.13935	0.1412	0.14068	0.14194	0.15382	0.13792	0.1246	0.12098	0.12534	0.12328	0.12343	0.12642	0.13961	0.13855	0.1396	0.14023	0.13962	0.13883	0.14124	0.13797	0.13555	0.13497	0.13545
845	0.12388	0.12401	0.12333	0.12435	0.12499	0.12565	0.12371	0.13188	0.13675	0.12526	0.12887	0.13656	0.14395	0.14595	0.14162	0.12449	0.12583	0.12545	0.13205	0.12871	0.13716	0.14109	0.14176	0.12971	0.12876	0.13007	0.1427	0.1447	0.14412	0.14551	0.15807	0.14122	0.12745	0.12368	0.12822	0.12608	0.12624	0.12924	0.14302	0.14193	0.14301	0.14371	0.14302	0.14217	0.14478	0.14126	0.13873	0.13809	0.13867
846	0.12669	0.12681	0.1261	0.12719	0.12786	0.12851	0.12645	0.1349	0.14008	0.12805	0.13182	0.13973	0.14761	0.14976	0.14511	0.12727	0.12867	0.12826	0.1351	0.13166	0.1404	0.14454	0.14523	0.13265	0.13169	0.13303	0.14618	0.14835	0.14771	0.14925	0.16257	0.14464	0.13037	0.12644	0.13118	0.12896	0.12912	0.13213	0.14658	0.14546	0.14656	0.14734	0.14656	0.14565	0.14848	0.14468	0.14203	0.14133	0.14201
847	0.12957	0.12968	0.12895	0.13012	0.13083	0.13146	0.12926	0.13804	0.14356	0.13093	0.13487	0.14302	0.15145	0.15378	0.14876	0.13013	0.1316	0.13115	0.13826	0.1347	0.14376	0.14814	0.14887	0.13569	0.13472	0.13609	0.14983	0.15219	0.15147	0.15318	0.16739	0.14822	0.13339	0.12928	0.13424	0.13193	0.13209	0.13511	0.1503	0.14916	0.15029	0.15115	0.15027	0.14929	0.15238	0.14825	0.14547	0.14469	0.1455
848	0.13255	0.13264	0.13188	0.13314	0.13388	0.13451	0.13216	0.14129	0.14719	0.13389	0.13803	0.14644	0.15549	0.15802	0.15259	0.13308	0.13461	0.13412	0.14154	0.13785	0.14727	0.15192	0.15269	0.13883	0.13785	0.13925	0.15367	0.15624	0.15543	0.15734	0.17256	0.15197	0.13651	0.1322	0.13741	0.135	0.13515	0.13819	0.15422	0.15305	0.1542	0.15515	0.15417	0.1531	0.15648	0.15199	0.14907	0.14819	0.14914
849	0.13562	0.1357	0.1349	0.13626	0.13705	0.13766	0.13514	0.14467	0.15099	0.13695	0.1413	0.15001	0.15978	0.16253	0.15663	0.13611	0.13773	0.13719	0.14495	0.14111	0.15094	0.1559	0.15671	0.14209	0.1411	0.14253	0.1577	0.16052	0.15962	0.16174	0.17815	0.15592	0.13975	0.13521	0.14069	0.13817	0.13833	0.14138	0.15835	0.15714	0.15833	0.15939	0.15829	0.15712	0.16083	0.15593	0.15283	0.15186	0.15296
850	0.1388	0.13886	0.13803	0.1395	0.14033	0.14092	0.13822	0.14819	0.155	0.14011	0.14471	0.15376	0.16433	0.16734	0.1609	0.13926	0.14096	0.14038	0.14851	0.1445	0.15479	0.16011	0.16096	0.14548	0.14448	0.14595	0.16198	0.16507	0.16407	0.16644	0.18423	0.16009	0.14311	0.13833	0.14411	0.14147	0.14162	0.1447	0.16274	0.16148	0.16271	0.1639	0.16265	0.16137	0.16546	0.16009	0.1568	0.15571	0.15698
851	0.14211	0.14215	0.14127	0.14286	0.14375	0.14433	0.14142	0.15189	0.15924	0.1434	0.14826	0.1577	0.1692	0.17251	0.16545	0.14252	0.14432	0.14368	0.15224	0.14804	0.15885	0.16458	0.16548	0.14902	0.148	0.14952	0.16653	0.16994	0.16882	0.17147	0.19091	0.16451	0.14662	0.14155	0.14769	0.1449	0.14505	0.14815	0.16742	0.1661	0.16739	0.16871	0.16731	0.1659	0.17042	0.1645	0.16099	0.15978	0.16124
852	0.14555	0.14557	0.14464	0.14637	0.14732	0.14787	0.14473	0.15576	0.16374	0.14682	0.15199	0.16186	0.17442	0.1781	0.17031	0.14591	0.14783	0.14712	0.15616	0.15175	0.16315	0.16935	0.17031	0.15272	0.15168	0.15325	0.1714	0.17518	0.17392	0.17691	0.1983	0.16924	0.15029	0.14491	0.15143	0.14848	0.14863	0.15175	0.17243	0.17104	0.1724	0.17388	0.1723	0.17074	0.17576	0.16922	0.16544	0.16409	0.16577
853	0.14914	0.14914	0.14816	0.15005	0.15106	0.15159	0.14818	0.15985	0.16854	0.15038	0.1559	0.16628	0.18008	0.18417	0.17553	0.14945	0.15149	0.15072	0.16029	0.15564	0.16773	0.17447	0.17551	0.15661	0.15555	0.15718	0.17665	0.18086	0.17944	0.18281	0.20657	0.17431	0.15414	0.1484	0.15536	0.15223	0.15239	0.15553	0.17784	0.17637	0.1778	0.17947	0.17768	0.17595	0.18155	0.17427	0.1702	0.16868	0.17061
854	0.1529	0.15287	0.15183	0.1539	0.15498	0.15549	0.15179	0.16418	0.17369	0.15412	0.16002	0.17099	0.18624	0.19082	0.18119	0.15315	0.15533	0.15448	0.16468	0.15975	0.17262	0.18	0.18113	0.16071	0.15963	0.16133	0.18234	0.18705	0.18544	0.18926	0.21591	0.17978	0.15819	0.15206	0.15951	0.15617	0.15633	0.15951	0.18371	0.18213	0.18367	0.18556	0.18353	0.18158	0.18788	0.17974	0.1753	0.17359	0.17581
855	0.15686	0.1568	0.15569	0.15796	0.15913	0.15961	0.15557	0.16879	0.17925	0.15805	0.1644	0.17605	0.193	0.19816	0.18735	0.15705	0.15938	0.15845	0.16935	0.1641	0.17789	0.18602	0.18726	0.16506	0.16395	0.16572	0.18855	0.19386	0.19203	0.19637	0.2266	0.18574	0.16248	0.1559	0.16391	0.16034	0.1605	0.16371	0.19013	0.18842	0.19009	0.19223	0.18992	0.18773	0.19484	0.18569	0.18082	0.17889	0.18144
856	0.16105	0.16095	0.15976	0.16226	0.16352	0.16397	0.15954	0.17373	0.18529	0.16219	0.16906	0.18152	0.20049	0.20635	0.19412	0.16115	0.16367	0.16263	0.17436	0.16873	0.1836	0.19263	0.194	0.16969	0.16855	0.17041	0.1954	0.20143	0.19934	0.20431	0.23902	0.19229	0.16705	0.15994	0.1686	0.16475	0.16492	0.16818	0.19724	0.19535	0.19719	0.19963	0.19699	0.1945	0.20258	0.19222	0.18684	0.18465	0.18759
857	0.16549	0.16535	0.16408	0.16683	0.1682	0.16861	0.16375	0.17904	0.19191	0.16659	0.17405	0.18747	0.20887	0.2156	0.20164	0.1655	0.16823	0.16708	0.17976	0.17369	0.18984	0.19994	0.20148	0.17465	0.17347	0.17544	0.20304	0.20993	0.20752	0.21325	0.2537	0.19955	0.17193	0.16422	0.17362	0.16946	0.16963	0.17295	0.20516	0.20305	0.20511	0.2079	0.20488	0.20203	0.21128	0.19947	0.19346	0.19097	0.19434
858	0.17023	0.17004	0.16866	0.17171	0.17322	0.17359	0.16821	0.18481	0.19922	0.17128	0.17942	0.19402	0.21835	0.22614	0.21008	0.17014	0.17311	0.17182	0.18562	0.17903	0.19671	0.20813	0.20988	0.17999	0.17876	0.18086	0.21164	0.21959	0.21681	0.22345	0.27136	0.20768	0.17717	0.16877	0.17903	0.17451	0.17468	0.17809	0.21411	0.2117	0.21405	0.21727	0.21379	0.21049	0.22118	0.20759	0.20081	0.19796	0.20185
859	0.17531	0.17506	0.17357	0.17696	0.17862	0.17894	0.17298	0.19111	0.20736	0.17631	0.18526	0.20129	0.22921	0.23832	0.21966	0.17511	0.17835	0.17692	0.19204	0.18482	0.20437	0.21741	0.21943	0.1858	0.1845	0.18676	0.22147	0.23072	0.22749	0.23525	0.293	0.21692	0.18285	0.17364	0.18491	0.17995	0.18013	0.18365	0.22434	0.22154	0.22427	0.228	0.22399	0.22014	0.23258	0.21682	0.20906	0.20579	0.21029
860	0.18079	0.18048	0.17886	0.18265	0.18447	0.18475	0.17811	0.19807	0.21654	0.18175	0.19164	0.20945	0.24184	0.25263	0.23069	0.18046	0.18403	0.18243	0.19914	0.19115	0.213	0.22806	0.23044	0.19216	0.19078	0.19322	0.23288	0.24376	0.23996	0.24912	0.32014	0.22757	0.18904	0.17888	0.19134	0.18586	0.18605	0.18972	0.23622	0.23288	0.23614	0.24051	0.23583	0.23129	0.24595	0.22746	0.21846	0.21467	0.2199
861	0.18676	0.18638	0.18459	0.18884	0.19087	0.19109	0.18366	0.20583	0.22701	0.18766	0.19869	0.21874	0.25677	0.2697	0.2436	0.18628	0.19023	0.18843	0.20707	0.19814	0.22286	0.2405	0.24334	0.19919	0.1977	0.20039	0.24636	0.25932	0.25482	0.26573	0.35495	0.24006	0.19586	0.18456	0.19843	0.19234	0.19254	0.19641	0.25026	0.24617	0.25016	0.25531	0.24984	0.2444	0.26189	0.23995	0.22933	0.22492	0.23102
862	0.1933	0.19283	0.19085	0.19566	0.19793	0.19809	0.18971	0.21458	0.23911	0.19415	0.20656	0.22948	0.27472	0.29046	0.25899	0.19266	0.19707	0.19503	0.21604	0.20592	0.2343	0.25527	0.25875	0.20705	0.20541	0.20841	0.26259	0.27825	0.27286	0.28602	0.40051	0.25501	0.20343	0.19077	0.20634	0.19949	0.19971	0.20388	0.26716	0.26201	0.26704	0.27318	0.26672	0.26013	0.28128	0.25489	0.24215	0.23696	0.2441
863	0.20055	0.19998	0.19776	0.20322	0.20578	0.20589	0.19638	0.22459	0.25333	0.20135	0.21544	0.24214	0.29678	0.3162	0.2777	0.19972	0.20468	0.20237	0.22633	0.21471	0.24783	0.2732	0.27756	0.21595	0.21411	0.21751	0.28262	0.30184	0.29531	0.31135	0.46099	0.27331	0.21193	0.19762	0.21526	0.20749	0.20773	0.21231	0.28796	0.2813	0.28781	0.2952	0.28755	0.27943	0.30539	0.27319	0.25757	0.2514	0.25982
864	0.20865	0.20796	0.20547	0.2117	0.21463	0.21468	0.2038	0.23621	0.2703	0.20942	0.22562	0.25738	0.32444	0.34878	0.30099	0.20763	0.21326	0.21062	0.23834	0.22477	0.26417	0.29545	0.30107	0.2262	0.22406	0.22801	0.30797	0.33195	0.32394	0.34376	0.54094	0.29633	0.22161	0.20526	0.22547	0.21652	0.2168	0.22199	0.31419	0.30532	0.31401	0.32301	0.31387	0.30369	0.33611	0.29619	0.2766	0.26918	0.27918
865	0.21782	0.217	0.21416	0.22134	0.2247	0.22471	0.21217	0.24997	0.29097	0.21862	0.23747	0.27615	0.35992	0.39084	0.33073	0.21659	0.22306	0.22002	0.25263	0.23646	0.28439	0.32382	0.33125	0.23819	0.23565	0.24032	0.34094	0.37137	0.36144	0.38619	0.64203	0.32612	0.2328	0.21389	0.23732	0.22688	0.22721	0.23331	0.34813	0.33597	0.3479	0.35897	0.34801	0.33503	0.3762	0.32595	0.30076	0.29172	0.30368
866	0.22836	0.22738	0.2241	0.23244	0.23636	0.23634	0.22174	0.26658	0.31664	0.22924	0.25153	0.29994	0.40634	0.44594	0.36967	0.22691	0.23445	0.23093	0.27001	0.25032	0.3101	0.36095	0.37105	0.25252	0.24938	0.25508	0.38504	0.42418	0.41178	0.44286	0.75511	0.36587	0.24597	0.22379	0.25133	0.23896	0.23937	0.24681	0.39316	0.37608	0.39288	0.40658	0.39346	0.37666	0.42968	0.36564	0.33242	0.32123	0.33563
867	0.24067	0.2395	0.23566	0.24545	0.25006	0.25007	0.23288	0.28711	0.34925	0.24177	0.26858	0.33096	0.4679	0.51832	0.42187	0.23902	0.24795	0.24382	0.29171	0.26712	0.34377	0.41083	0.42487	0.27008	0.26605	0.27321	0.44537	0.49586	0.48046	0.51908	0.8535	0.42036	0.26177	0.23534	0.26825	0.2533	0.25382	0.26336	0.45414	0.42976	0.45379	0.47068	0.4552	0.43331	0.50182	0.42004	0.37528	0.36123	0.37866
868	0.2553	0.25393	0.24936	0.26096	0.26648	0.26661	0.2461	0.31316	0.39151	0.25687	0.2898	0.37257	0.5491	0.61099	0.49278	0.25353	0.26429	0.25941	0.31957	0.288	0.38916	0.47902	0.49867	0.29219	0.28679	0.29613	0.52842	0.59189	0.57344	0.61913	0.90733	0.4961	0.2812	0.24908	0.28918	0.27071	0.2714	0.28422	0.53704	0.5025	0.53661	0.55686	0.53934	0.51122	0.59769	0.49575	0.43501	0.41714	0.43819
869	0.27308	0.2715	0.26595	0.27987	0.28659	0.287	0.26218	0.34714	0.44721	0.27556	0.31696	0.42959	0.65133	0.72001	0.5878	0.27136	0.28462	0.27877	0.35639	0.31474	0.45169	0.57162	0.59829	0.32095	0.31342	0.32604	0.6387	0.71128	0.69154	0.73872	0.91151	0.59931	0.30574	0.26585	0.31578	0.29238	0.29334	0.31137	0.64571	0.59949	0.64522	0.66749	0.64958	0.61578	0.71569	0.5992	0.51923	0.49655	0.52148
870	0.29522	0.29343	0.28654	0.30349	0.3118	0.3128	0.28227	0.39264	0.5209	0.29938	0.35278	0.5078	0.76462	0.82602	0.70584	0.2939	0.31068	0.30356	0.40635	0.35007	0.53775	0.68954	0.72184	0.35957	0.34869	0.36636	0.7677	0.8336	0.81726	0.85328	0.88368	0.72724	0.33765	0.28689	0.35055	0.32013	0.32152	0.34786	0.77151	0.71887	0.77105	0.79092	0.77638	0.74235	0.83536	0.72787	0.63418	0.60662	0.63433
871	0.32356	0.32161	0.31286	0.33377	0.34428	0.34639	0.30819	0.45477	0.61589	0.3308	0.40136	0.6106	0.86111	0.89792	0.82668	0.32336	0.34519	0.33638	0.475	0.39822	0.65005	0.8151	0.84518	0.413	0.39694	0.42227	0.88101	0.91849	0.91038	0.9246	0.84017	0.85275	0.38035	0.31415	0.39726	0.35679	0.35883	0.39809	0.88166	0.83861	0.88137	0.89285	0.88563	0.86192	0.9179	0.85422	0.77172	0.74273	0.76907
872	0.3609	0.35897	0.34756	0.37371	0.38724	0.39139	0.34279	0.5395	0.72788	0.37365	0.46843	0.73006	0.91109	0.91902	0.91084	0.3632	0.39243	0.38129	0.56779	0.46534	0.77556	0.90774	0.92513	0.48795	0.46442	0.50068	0.93767	0.9419	0.94165	0.93735	0.78935	0.93063	0.43882	0.3507	0.46115	0.40663	0.40965	0.46753	0.93726	0.91857	0.9372	0.93885	0.93883	0.93143	0.94074	0.93213	0.89285	0.87066	0.88905
873	0.41153	0.40997	0.3948	0.42781	0.44543	0.45306	0.39059	0.64947	0.83559	0.43375	0.56025	0.838	0.91135	0.90042	0.93477	0.4188	0.45869	0.44436	0.68389	0.55857	0.87787	0.93846	0.94131	0.59073	0.5584	0.60735	0.9341	0.91908	0.92272	0.91022	0.7357	0.94311	0.51929	0.40142	0.54814	0.4758	0.48013	0.56062	0.93436	0.93767	0.93445	0.93046	0.93397	0.93811	0.91861	0.94385	0.95075	0.94104	0.94885
874	0.48161	0.48112	0.46079	0.50228	0.52508	0.53799	0.45833	0.77304	0.90573	0.51873	0.67801	0.89988	0.88071	0.86089	0.91297	0.49779	0.55172	0.53329	0.80479	0.68022	0.92328	0.91937	0.91372	0.71852	0.68107	0.73692	0.89706	0.87464	0.87962	0.86469	0.68154	0.91307	0.62633	0.4735	0.66054	0.5713	0.57697	0.67499	0.89828	0.91287	0.89842	0.89257	0.89695	0.90584	0.87506	0.91312	0.94371	0.94331	0.94458
875	0.57831	0.57979	0.55352	0.60362	0.63142	0.65025	0.5543	0.87543	0.92294	0.63424	0.80462	0.9079	0.83519	0.81145	0.86924	0.60767	0.67495	0.65289	0.89298	0.81253	0.91571	0.8763	0.86657	0.84386	0.81402	0.8581	0.84568	0.82068	0.82596	0.81089	0.62798	0.86452	0.75325	0.57542	0.7859	0.69485	0.70078	0.79226	0.84776	0.86763	0.84792	0.84168	0.84596	0.85661	0.82197	0.86413	0.90351	0.9072	0.90626
876	0.70332	0.70713	0.67741	0.73063	0.75908	0.77965	0.68169	0.92262	0.90125	0.7706	0.89974	0.88058	0.78289	0.75791	0.81572	0.74469	0.81146	0.79028	0.92382	0.91094	0.87898	0.82267	0.8109	0.92139	0.91187	0.92674	0.78812	0.76297	0.76801	0.75398	0.57553	0.80785	0.86902	0.70876	0.88854	0.82711	0.83071	0.87857	0.79103	0.8134	0.79118	0.78528	0.78896	0.8	0.76511	0.80718	0.84948	0.85484	0.85348
877	0.83596	0.8403	0.81632	0.85766	0.877	0.88948	0.82035	0.91688	0.85927	0.88756	0.93416	0.83541	0.72814	0.70326	0.75839	0.87392	0.91452	0.90152	0.90823	0.94384	0.82866	0.76489	0.75209	0.93493	0.94353	0.93308	0.72852	0.70438	0.7089	0.69645	0.52433	0.74821	0.93253	0.84763	0.93455	0.92211	0.92152	0.91134	0.73227	0.75582	0.73241	0.72718	0.72999	0.74078	0.70733	0.74734	0.78986	0.79568	0.79477
878	0.92873	0.93042	0.92193	0.93777	0.94179	0.94069	0.92008	0.88082	0.80798	0.94136	0.91855	0.78196	0.67308	0.64898	0.70011	0.94399	0.94911	0.94598	0.86778	0.92495	0.77251	0.706	0.69265	0.90627	0.92365	0.90096	0.66874	0.64615	0.65002	0.63944	0.47435	0.68794	0.93603	0.93786	0.92691	0.95001	0.94651	0.89849	0.67339	0.6976	0.67351	0.66912	0.6709	0.68115	0.64992	0.68692	0.72852	0.7342	0.73421
879	0.95295	0.95129	0.95641	0.95137	0.94465	0.93431	0.94843	0.83066	0.75299	0.93385	0.87702	0.72506	0.6187	0.59571	0.64216	0.94569	0.92959	0.93202	0.81583	0.88078	0.71425	0.64737	0.63371	0.858	0.87887	0.85126	0.60964	0.58889	0.59203	0.58342	0.42548	0.62808	0.90299	0.95449	0.88933	0.92759	0.92319	0.85982	0.61525	0.63993	0.61536	0.61191	0.61253	0.6221	0.59345	0.62694	0.66711	0.67234	0.67351
880	0.92773	0.92416	0.93517	0.92141	0.91044	0.8961	0.92437	0.7744	0.69702	0.89376	0.82384	0.66706	0.56546	0.5437	0.58516	0.90873	0.88423	0.8889	0.75896	0.82569	0.65565	0.58965	0.57577	0.80125	0.82338	0.794	0.5516	0.53281	0.53519	0.52859	0.37765	0.56912	0.85319	0.92358	0.83806	0.88143	0.87696	0.80863	0.55824	0.58333	0.55833	0.55585	0.55524	0.56407	0.53812	0.56789	0.60639	0.61097	0.61349
881	0.88002	0.87552	0.88836	0.8721	0.85983	0.84385	0.8765	0.71591	0.64139	0.83974	0.76585	0.60914	0.51346	0.49295	0.52931	0.85559	0.82806	0.8335	0.70038	0.76631	0.59756	0.53307	0.51901	0.74124	0.76369	0.73391	0.49479	0.47796	0.4796	0.47494	0.33096	0.51124	0.79628	0.87252	0.78104	0.82531	0.82099	0.75179	0.50248	0.52799	0.50255	0.50104	0.49917	0.50724	0.48397	0.50997	0.54667	0.55052	0.55445
882	0.82311	0.81806	0.8313	0.81484	0.80247	0.78581	0.81888	0.65705	0.58668	0.78001	0.70627	0.55188	0.46266	0.44336	0.47468	0.79587	0.76767	0.7732	0.64162	0.70565	0.54036	0.4777	0.4635	0.68037	0.70277	0.67315	0.43926	0.42434	0.42528	0.42244	0.28582	0.45454	0.73679	0.81336	0.72205	0.76541	0.76128	0.69273	0.44797	0.47389	0.44803	0.44745	0.44435	0.45167	0.43095	0.45325	0.48811	0.49119	0.49653
883	0.76258	0.75714	0.77013	0.75458	0.74266	0.7257	0.75729	0.59864	0.53309	0.71822	0.64656	0.49554	0.41299	0.39482	0.42126	0.73375	0.70597	0.71123	0.58336	0.64504	0.4842	0.42356	0.40927	0.61968	0.64189	0.61268	0.38513	0.37204	0.37236	0.37114	0.24303	0.39913	0.67673	0.7511	0.66275	0.70442	0.70049	0.63305	0.39477	0.42099	0.39481	0.39507	0.39084	0.39744	0.3791	0.39787	0.43079	0.43312	0.43978
884	0.70129	0.69551	0.70798	0.69386	0.6826	0.66543	0.69469	0.54112	0.48065	0.6562	0.58744	0.44028	0.36445	0.34736	0.36915	0.67132	0.64441	0.64923	0.52597	0.58514	0.42917	0.37076	0.35649	0.55974	0.58173	0.55301	0.33272	0.32135	0.32116	0.32129	0.20379	0.34528	0.6171	0.68826	0.60401	0.64371	0.63995	0.57362	0.34306	0.36935	0.34309	0.34407	0.33889	0.34478	0.32864	0.3441	0.37491	0.37654	0.38432
885	0.64041	0.63429	0.64614	0.63368	0.62317	0.60579	0.6323	0.48468	0.42932	0.59474	0.52925	0.38629	0.31724	0.30125	0.31867	0.60944	0.5836	0.58788	0.46958	0.52623	0.37544	0.31964	0.30561	0.5008	0.52255	0.49434	0.28267	0.27295	0.27238	0.27354	0.16945	0.29362	0.55833	0.62587	0.54617	0.58382	0.58022	0.51488	0.29336	0.31925	0.29337	0.2949	0.28905	0.29425	0.28018	0.29257	0.32093	0.32196	0.33052
886	0.5804	0.57391	0.5851	0.57444	0.56472	0.54709	0.57065	0.42943	0.37908	0.53416	0.47209	0.33394	0.27191	0.25717	0.27051	0.54846	0.52378	0.52749	0.41431	0.4684	0.32338	0.27091	0.25749	0.44299	0.46448	0.43683	0.23605	0.22796	0.22717	0.22897	0.1411	0.24522	0.50058	0.56433	0.48935	0.52496	0.5215	0.45706	0.24659	0.27136	0.24659	0.24845	0.24233	0.2468	0.23477	0.24433	0.26973	0.27027	0.27916
887	0.52143	0.51456	0.52508	0.51626	0.50733	0.48945	0.50996	0.37554	0.33012	0.47465	0.41607	0.2839	0.22941	0.21618	0.22582	0.48855	0.46506	0.46819	0.3604	0.41178	0.27377	0.22577	0.21344	0.38653	0.40765	0.38068	0.19434	0.18787	0.187	0.18908	0.1191	0.20159	0.44391	0.50382	0.43361	0.4672	0.46387	0.40041	0.20411	0.22681	0.20411	0.20608	0.20012	0.20385	0.19388	0.20089	0.22268	0.22287	0.23149
888	0.46363	0.45638	0.46622	0.45923	0.45107	0.43295	0.45045	0.3234	0.28296	0.41638	0.36143	0.23728	0.1911	0.17971	0.18611	0.42987	0.4076	0.41019	0.30835	0.35662	0.22782	0.18574	0.17504	0.33185	0.35236	0.32635	0.15904	0.15413	0.15332	0.15533	0.10295	0.16437	0.38847	0.4445	0.37908	0.41065	0.40744	0.34536	0.16748	0.18709	0.16747	0.16933	0.16398	0.16693	0.15907	0.16386	0.18148	0.18145	0.1892
889	0.4071	0.39951	0.40868	0.40342	0.39601	0.37776	0.39237	0.27376	0.23853	0.35971	0.3087	0.19558	0.15832	0.14905	0.1528	0.37271	0.35173	0.35382	0.25913	0.30353	0.18713	0.15227	0.14356	0.27977	0.29925	0.2747	0.13104	0.12754	0.12685	0.12861	0.091597	0.13465	0.3346	0.38662	0.32615	0.35556	0.35251	0.29266	0.13781	0.15368	0.1378	0.1394	0.13496	0.13717	0.13132	0.13431	0.14761	0.14747	0.1539
890	0.35213	0.34431	0.35277	0.3491	0.34242	0.3243	0.33618	0.22783	0.1982	0.30528	0.25887	0.16028	0.13198	0.12486	0.12665	0.31761	0.29813	0.29979	0.21415	0.25356	0.15315	0.12606	0.11943	0.23161	0.24944	0.2271	0.1102	0.10787	0.10732	0.10874	0.083913	0.11246	0.28307	0.33065	0.27561	0.30252	0.29967	0.24354	0.11532	0.12737	0.11531	0.11658	0.11312	0.11469	0.11059	0.11225	0.12163	0.12147	0.12641
891	0.29931	0.29147	0.29915	0.29686	0.29093	0.27341	0.28275	0.18716	0.16347	0.25423	0.21341	0.13225	0.11203	0.10686	0.10732	0.2656	0.24797	0.24925	0.17507	0.20828	0.12658	0.10676	0.10195	0.18906	0.20454	0.18525	0.095469	0.094007	0.093581	0.094704	0.078936	0.09676	0.23512	0.2775	0.22875	0.25262	0.25004	0.19962	0.099163	0.10787	0.099153	0.10013	0.097547	0.098608	0.095891	0.096629	0.10289	0.10273	0.10632
892	0.24972	0.24217	0.24893	0.24778	0.24265	0.22638	0.23341	0.15317	0.13536	0.20815	0.17401	0.11134	0.097705	0.094103	0.093732	0.21815	0.20287	0.20383	0.1432	0.1694	0.10706	0.093236	0.089866	0.15366	0.16622	0.15065	0.085459	0.08462	0.084291	0.085178	0.075933	0.086099	0.19241	0.22857	0.18724	0.20739	0.20517	0.16249	0.088062	0.094142	0.088054	0.088789	0.086901	0.087589	0.085894	0.086024	0.090003	0.089863	0.092379
893	0.20491	0.19804	0.20372	0.20342	0.19918	0.18491	0.18989	0.12658	0.11403	0.16877	0.14201	0.096536	0.087825	0.085417	0.084534	0.17702	0.16456	0.16525	0.1189	0.13816	0.093405	0.084103	0.081799	0.12618	0.13566	0.12396	0.07889	0.07849	0.078231	0.078946	0.07437	0.079099	0.15656	0.18564	0.15262	0.16858	0.1668	0.13312	0.080695	0.08484	0.080688	0.081243	0.079872	0.080292	0.079331	0.07906	0.081438	0.081318	0.083051
894	0.16657	0.16076	0.16524	0.16548	0.16218	0.15053	0.15378	0.10704	0.098713	0.13731	0.11774	0.08645	0.081259	0.079728	0.078527	0.14364	0.13416	0.13462	0.10143	0.11473	0.084193	0.078151	0.076617	0.10617	0.11289	0.10462	0.074786	0.074696	0.074488	0.075078	0.073857	0.074705	0.12846	0.15027	0.12567	0.13744	0.13611	0.11136	0.076012	0.078756	0.076006	0.07643	0.075437	0.075664	0.075232	0.074689	0.075946	0.075843	0.077016
895	0.13592	0.13136	0.13465	0.13517	0.13278	0.12394	0.12585	0.093364	0.088162	0.11386	0.1004	0.079808	0.077108	0.076219	0.074814	0.11839	0.11164	0.11193	0.089427	0.098149	0.078192	0.074482	0.073507	0.09231	0.096851	0.091275	0.072453	0.072585	0.072415	0.072914	0.074107	0.072176	0.10785	0.12314	0.106	0.11413	0.1132	0.096075	0.073259	0.074984	0.073254	0.073582	0.072867	0.072952	0.072904	0.072176	0.072637	0.072548	0.073318
896	0.11303	0.10969	0.11194	0.11256	0.11094	0.10464	0.10562	0.084134	0.081149	0.097353	0.088529	0.075641	0.074715	0.074295	0.072759	0.10042	0.095852	0.096022	0.081443	0.086882	0.074493	0.072462	0.071892	0.083035	0.085995	0.082368	0.071401	0.071693	0.07155	0.071984	0.074911	0.070989	0.09349	0.10362	0.09234	0.097657	0.097046	0.085736	0.0719	0.072884	0.071896	0.072154	0.071643	0.071626	0.071857	0.071	0.070893	0.070815	0.071295
897	0.096896	0.094551	0.096014	0.096623	0.095596	0.09129	0.091662	0.07812	0.0767	0.086183	0.080668	0.07326	0.073603	0.073526	0.071904	0.088167	0.085205	0.085292	0.076336	0.079466	0.072455	0.071633	0.071359	0.077032	0.078873	0.076626	0.071275	0.071682	0.071558	0.071945	0.076116	0.070771	0.083843	0.090239	0.083182	0.086484	0.086104	0.078966	0.071551	0.071996	0.071547	0.071755	0.071393	0.071301	0.071736	0.070789	0.070278	0.070207	0.070478
898	0.08596	0.084363	0.08526	0.085828	0.085223	0.082378	0.082358	0.074421	0.074113	0.078865	0.075673	0.072175	0.073425	0.073597	0.07192	0.080085	0.078253	0.078285	0.073299	0.074793	0.07162	0.071669	0.071607	0.073366	0.074411	0.073144	0.071816	0.072306	0.072195	0.072552	0.077611	0.071251	0.077584	0.08136	0.077264	0.07915	0.078932	0.074749	0.071932	0.071986	0.071928	0.0721	0.071847	0.0717	0.072284	0.071273	0.070474	0.07041	0.070531
899	0.0788	0.077738	0.078241	0.078764	0.078452	0.076645	0.07637	0.072387	0.072872	0.074273	0.072721	0.072023	0.07392	0.074275	0.07256	0.074956	0.073919	0.073914	0.071749	0.072076	0.07165	0.072325	0.072417	0.071369	0.071845	0.07128	0.072836	0.073387	0.073285	0.073621	0.079316	0.07223	0.073734	0.075675	0.073653	0.074542	0.074438	0.072356	0.072837	0.072609	0.072833	0.072981	0.072805	0.072618	0.073311	0.072255	0.071252	0.07119	0.071207
900	0.074313	0.073633	0.073859	0.074344	0.074237	0.073167	0.07272	0.071553	0.072606	0.071617	0.071234	0.072541	0.074903	0.07539	0.073651	0.071918	0.071446	0.071415	0.071266	0.07076	0.072302	0.073426	0.07363	0.07057	0.070637	0.070576	0.074199	0.074796	0.074698	0.075021	0.081174	0.073566	0.071603	0.072245	0.071692	0.071871	0.071848	0.071271	0.074117	0.073686	0.074114	0.074244	0.074124	0.073907	0.074683	0.073592	0.072444	0.072385	0.072327
901	0.071728	0.071322	0.071352	0.071806	0.071845	0.071303	0.070739	0.071583	0.073042	0.070347	0.0708	0.073541	0.076237	0.076822	0.075064	0.070375	0.070307	0.070259	0.071552	0.070451	0.0734	0.074848	0.075131	0.070632	0.070406	0.070705	0.075808	0.076438	0.076344	0.07666	0.083144	0.075157	0.070709	0.070422	0.070918	0.07059	0.070625	0.071125	0.075668	0.07509	0.075664	0.075783	0.075703	0.075463	0.076301	0.075184	0.073933	0.073874	0.073766
902	0.070508	0.070299	0.07019	0.07062	0.070762	0.0706	0.069954	0.072235	0.073985	0.070074	0.071124	0.074887	0.077824	0.078481	0.076709	0.069905	0.070128	0.070066	0.07239	0.070865	0.074818	0.076499	0.07684	0.07131	0.070876	0.071432	0.077593	0.07825	0.078156	0.07847	0.085198	0.076931	0.070703	0.069753	0.070998	0.070307	0.070384	0.071653	0.077412	0.076729	0.077409	0.077521	0.077468	0.077211	0.078097	0.076958	0.075635	0.075574	0.075432
903	0.07028	0.070212	0.070003	0.070415	0.070631	0.07074	0.070038	0.073338	0.075296	0.070522	0.071996	0.076484	0.079597	0.080308	0.078523	0.070214	0.070643	0.070572	0.073627	0.071802	0.076468	0.078317	0.078699	0.072435	0.071853	0.072592	0.079505	0.080185	0.08009	0.080406	0.087316	0.078837	0.071341	0.06992	0.071697	0.070749	0.070855	0.07267	0.079297	0.078539	0.079294	0.079402	0.079367	0.079097	0.080022	0.078864	0.077489	0.077426	0.077263
904	0.070753	0.070787	0.070507	0.070906	0.071174	0.071477	0.070735	0.074759	0.076869	0.071478	0.073256	0.078257	0.081502	0.082255	0.080457	0.071072	0.071648	0.07157	0.075146	0.073109	0.078281	0.080253	0.080665	0.073875	0.073188	0.074056	0.081509	0.082207	0.08211	0.082431	0.089485	0.080837	0.072434	0.070678	0.072833	0.071702	0.071829	0.07403	0.081282	0.080471	0.081279	0.081387	0.081363	0.081082	0.08204	0.080863	0.079451	0.079385	0.07921
905	0.071723	0.07183	0.0715	0.071889	0.072195	0.072636	0.071865	0.076407	0.078629	0.072795	0.074789	0.080155	0.083504	0.084291	0.082477	0.072318	0.073	0.072917	0.076865	0.074677	0.080211	0.082274	0.082708	0.075537	0.074776	0.075736	0.083578	0.084294	0.084194	0.084522	0.091695	0.082904	0.07385	0.071853	0.07428	0.073017	0.073159	0.075633	0.083341	0.082491	0.083337	0.083447	0.083428	0.083138	0.084126	0.082928	0.08149	0.081419	0.081239
906	0.073051	0.073209	0.072843	0.073227	0.07356	0.074099	0.073306	0.078217	0.080524	0.074369	0.07652	0.082145	0.085579	0.086394	0.084562	0.073842	0.074601	0.074513	0.078728	0.076432	0.082227	0.084359	0.084809	0.077358	0.076545	0.077571	0.085697	0.086431	0.086326	0.086665	0.093943	0.085022	0.075496	0.073327	0.075949	0.074593	0.074745	0.07741	0.085454	0.084576	0.08545	0.085563	0.085546	0.085247	0.086264	0.085045	0.083585	0.083508	0.08333
907	0.074637	0.074832	0.07444	0.074821	0.075173	0.075781	0.07497	0.080145	0.08252	0.076129	0.078393	0.084203	0.087712	0.088551	0.086697	0.075567	0.076381	0.076289	0.080696	0.078324	0.084305	0.086493	0.086956	0.079295	0.078446	0.079517	0.087857	0.088608	0.088497	0.088849	0.096227	0.08718	0.077311	0.075017	0.07778	0.076356	0.076515	0.079313	0.087611	0.086714	0.087608	0.087726	0.087707	0.0874	0.088445	0.087201	0.085724	0.085641	0.085468
908	0.076408	0.076628	0.076218	0.076598	0.076965	0.07762	0.076795	0.082159	0.084591	0.078022	0.080369	0.086312	0.089891	0.090753	0.088873	0.077436	0.07829	0.078193	0.08274	0.080313	0.086432	0.088667	0.089139	0.081314	0.080441	0.081544	0.090049	0.090819	0.090702	0.091069	0.098546	0.08937	0.079246	0.076861	0.079727	0.078254	0.078418	0.081306	0.089805	0.088893	0.089801	0.089925	0.089902	0.089587	0.090661	0.08939	0.087898	0.087807	0.087643
909	0.078316	0.078553	0.07813	0.078513	0.07889	0.079577	0.078738	0.084239	0.086721	0.080013	0.082423	0.088463	0.092109	0.092994	0.091084	0.079411	0.080294	0.080193	0.084843	0.082375	0.088599	0.090874	0.091355	0.083397	0.082507	0.083632	0.09227	0.093062	0.092937	0.093322	0.1009	0.09159	0.081271	0.078819	0.081761	0.080253	0.08042	0.083368	0.09203	0.091107	0.092026	0.092159	0.092128	0.091805	0.09291	0.091608	0.090101	0.090001	0.089849
910	0.080313	0.080563	0.080129	0.080516	0.080902	0.081611	0.080757	0.086364	0.088894	0.082069	0.084528	0.090644	0.094361	0.095269	0.093324	0.081454	0.082362	0.082256	0.086987	0.084488	0.090795	0.09311	0.093597	0.085523	0.084621	0.085763	0.094518	0.095332	0.095198	0.095604	0.10329	0.093836	0.083355	0.08085	0.083854	0.082318	0.082487	0.085476	0.094283	0.093352	0.094279	0.094421	0.094381	0.094049	0.095188	0.093851	0.092329	0.092219	0.092082
911	0.082384	0.082641	0.0822	0.082593	0.082986	0.083709	0.082839	0.088528	0.091107	0.084179	0.086679	0.092855	0.096647	0.09758	0.095593	0.083556	0.084481	0.084371	0.089168	0.086643	0.093022	0.095375	0.095868	0.087686	0.086777	0.08793	0.096792	0.097632	0.097488	0.097916	0.10572	0.096107	0.085491	0.082943	0.085997	0.084439	0.084609	0.087623	0.096565	0.095627	0.096561	0.096713	0.096663	0.096321	0.097497	0.096119	0.094582	0.094461	0.094341
912	0.084497	0.084759	0.084311	0.084712	0.085112	0.085844	0.084957	0.090719	0.09335	0.08632	0.088858	0.095089	0.098964	0.099923	0.09789	0.08569	0.086632	0.086516	0.091375	0.088825	0.095272	0.097666	0.098165	0.089874	0.088959	0.090122	0.099092	0.09996	0.099805	0.10026	0.1082	0.098404	0.087658	0.085071	0.088171	0.086593	0.086764	0.089796	0.098874	0.09793	0.09887	0.099034	0.098971	0.098618	0.099835	0.098413	0.096859	0.096725	0.096625
913	0.08665	0.086915	0.086462	0.086873	0.087279	0.088016	0.08711	0.092939	0.095625	0.088492	0.091067	0.097351	0.10132	0.1023	0.10022	0.087857	0.088815	0.088692	0.09361	0.091036	0.097549	0.099987	0.10049	0.092088	0.091169	0.09234	0.10142	0.10232	0.10215	0.10264	0.11072	0.10073	0.089858	0.087233	0.090378	0.08878	0.088952	0.091996	0.10121	0.10026	0.10121	0.10139	0.10131	0.10095	0.10221	0.10073	0.099161	0.099013	0.098936
914	0.088833	0.089099	0.08864	0.089063	0.089476	0.090216	0.089288	0.095184	0.097931	0.090689	0.093301	0.099638	0.1037	0.10472	0.10258	0.090049	0.091023	0.090893	0.09587	0.093272	0.099854	0.10234	0.10285	0.094326	0.093403	0.094582	0.10378	0.10472	0.10453	0.10505	0.11329	0.10308	0.092084	0.08942	0.092612	0.090994	0.091166	0.094219	0.10359	0.10263	0.10358	0.10377	0.10368	0.1033	0.10461	0.10309	0.10149	0.10133	0.10128
915	0.091044	0.091311	0.090846	0.091283	0.091703	0.092444	0.091491	0.097456	0.10027	0.092909	0.095562	0.10195	0.10613	0.10718	0.10497	0.092266	0.093255	0.093117	0.098157	0.095533	0.10219	0.10472	0.10524	0.096588	0.095662	0.096849	0.10618	0.10715	0.10695	0.1075	0.11592	0.10547	0.094336	0.091632	0.094872	0.093234	0.093406	0.096467	0.106	0.10503	0.10599	0.1062	0.10609	0.10569	0.10706	0.10547	0.10385	0.10367	0.10365
916	0.093283	0.093548	0.093077	0.093531	0.093958	0.094699	0.093717	0.099755	0.10264	0.095154	0.097849	0.1043	0.1086	0.10969	0.1074	0.094506	0.095512	0.095366	0.10047	0.097821	0.10455	0.10715	0.10767	0.098876	0.097948	0.099142	0.10861	0.10962	0.10941	0.11	0.11861	0.1079	0.096615	0.093867	0.097161	0.095501	0.095673	0.098739	0.10844	0.10748	0.10844	0.10867	0.10853	0.10812	0.10955	0.10789	0.10625	0.10605	0.10605
917	0.095546	0.09581	0.095333	0.095806	0.096241	0.096981	0.095966	0.10208	0.10506	0.097422	0.10016	0.10668	0.11112	0.11225	0.10987	0.09677	0.097794	0.097638	0.10282	0.10014	0.10696	0.10961	0.11014	0.10119	0.10026	0.10146	0.11108	0.11214	0.11191	0.11255	0.12137	0.11036	0.098922	0.096126	0.099478	0.097794	0.097966	0.10104	0.11093	0.10996	0.11093	0.11118	0.11102	0.11059	0.11209	0.11035	0.10868	0.10846	0.1085
918	0.097838	0.0981	0.097616	0.09811	0.098555	0.099292	0.098241	0.10445	0.10751	0.099717	0.10251	0.1091	0.11368	0.11486	0.11239	0.099061	0.1001	0.099938	0.1052	0.10248	0.1094	0.11212	0.11266	0.10354	0.1026	0.10381	0.1136	0.11472	0.11446	0.11515	0.12421	0.11287	0.10126	0.098412	0.10183	0.10012	0.10029	0.10336	0.11347	0.11249	0.11347	0.11374	0.11356	0.11311	0.11468	0.11286	0.11115	0.11091	0.11098
919	0.10016	0.10042	0.099923	0.10044	0.1009	0.10163	0.10054	0.10684	0.11001	0.10204	0.10489	0.11155	0.11631	0.11753	0.11496	0.10138	0.10244	0.10226	0.10761	0.10486	0.11188	0.11468	0.11523	0.10591	0.10497	0.10619	0.11617	0.11734	0.11707	0.1178	0.12714	0.11543	0.10363	0.10072	0.10421	0.10247	0.10264	0.10572	0.11607	0.11508	0.11606	0.11636	0.11614	0.11568	0.11733	0.11541	0.11367	0.1134	0.11352
920	0.1025	0.10275	0.10225	0.1028	0.10326	0.104	0.10286	0.10927	0.11255	0.10438	0.1073	0.11405	0.11899	0.12027	0.11759	0.10372	0.10481	0.10461	0.11006	0.10727	0.1144	0.11728	0.11784	0.10832	0.10738	0.10861	0.1188	0.12003	0.11973	0.12053	0.13015	0.11804	0.10602	0.10305	0.10662	0.10485	0.10502	0.10811	0.11871	0.11771	0.1187	0.11903	0.11878	0.1183	0.12004	0.11802	0.11623	0.11593	0.1161
921	0.10488	0.10513	0.10462	0.10519	0.10567	0.1064	0.10521	0.11174	0.11514	0.10676	0.10975	0.11659	0.12174	0.12309	0.12027	0.10609	0.10721	0.107	0.11256	0.10972	0.11698	0.11996	0.12053	0.11077	0.10982	0.11107	0.12148	0.12279	0.12246	0.12332	0.13327	0.12071	0.10846	0.10542	0.10907	0.10727	0.10744	0.11053	0.12143	0.12042	0.12142	0.12177	0.12149	0.12098	0.12282	0.12068	0.11885	0.11852	0.11874
922	0.10729	0.10754	0.10701	0.10762	0.10812	0.10884	0.1076	0.11426	0.1178	0.10918	0.11224	0.11919	0.12457	0.12599	0.12303	0.1085	0.10965	0.10942	0.1151	0.11221	0.11962	0.12269	0.12328	0.11326	0.11231	0.11357	0.12424	0.12562	0.12526	0.1262	0.13652	0.12345	0.11094	0.10782	0.11157	0.10972	0.1099	0.113	0.12421	0.12319	0.1242	0.12459	0.12427	0.12373	0.12568	0.12341	0.12153	0.12117	0.12144
923	0.10973	0.10998	0.10944	0.11009	0.1106	0.11132	0.11001	0.11682	0.12052	0.11163	0.11478	0.12185	0.12748	0.12897	0.12586	0.11094	0.11212	0.11188	0.11769	0.11474	0.12231	0.1255	0.1261	0.11579	0.11484	0.11611	0.12707	0.12854	0.12814	0.12916	0.13988	0.12626	0.11347	0.11026	0.11411	0.11222	0.11239	0.11551	0.12707	0.12604	0.12706	0.12749	0.12713	0.12655	0.12863	0.12622	0.12428	0.12388	0.12421
924	0.11222	0.11247	0.11192	0.1126	0.11313	0.11384	0.11247	0.11944	0.12331	0.11412	0.11737	0.12457	0.13048	0.13206	0.12877	0.11343	0.11464	0.11438	0.12034	0.11733	0.12507	0.12839	0.129	0.11838	0.11742	0.11871	0.12998	0.13155	0.13111	0.13222	0.1434	0.12915	0.11604	0.11273	0.11671	0.11476	0.11494	0.11806	0.13002	0.12898	0.13001	0.13048	0.13007	0.12945	0.13167	0.1291	0.1271	0.12666	0.12706
925	0.11476	0.115	0.11443	0.11516	0.11571	0.11642	0.11497	0.12212	0.12618	0.11667	0.12002	0.12736	0.13359	0.13526	0.13177	0.11596	0.11722	0.11694	0.12306	0.11997	0.12791	0.13137	0.132	0.12102	0.12006	0.12136	0.13298	0.13466	0.13418	0.13539	0.14709	0.13214	0.11867	0.11525	0.11936	0.11736	0.11754	0.12067	0.13306	0.13201	0.13305	0.13357	0.13311	0.13245	0.13482	0.13207	0.13	0.12951	0.12999
926	0.11735	0.11758	0.117	0.11778	0.11834	0.11905	0.11752	0.12487	0.12913	0.11926	0.12272	0.13023	0.13681	0.13859	0.13488	0.11854	0.11984	0.11954	0.12584	0.12268	0.13083	0.13445	0.1351	0.12373	0.12276	0.12408	0.13609	0.13789	0.13736	0.13868	0.15096	0.13521	0.12136	0.11782	0.12208	0.12002	0.12019	0.12334	0.13621	0.13514	0.1362	0.13677	0.13625	0.13555	0.13809	0.13514	0.133	0.13245	0.13302
927	0.11999	0.12022	0.11962	0.12045	0.12104	0.12174	0.12011	0.12768	0.13218	0.1219	0.1255	0.13318	0.14015	0.14205	0.13809	0.12118	0.12253	0.1222	0.1287	0.12545	0.13385	0.13763	0.1383	0.1265	0.12552	0.12687	0.13931	0.14124	0.14066	0.14211	0.15504	0.1384	0.12411	0.12044	0.12486	0.12273	0.12291	0.12607	0.13948	0.13839	0.13946	0.1401	0.1395	0.13875	0.14149	0.13832	0.13609	0.13549	0.13614
928	0.1227	0.12291	0.12229	0.12319	0.1238	0.12449	0.12277	0.13058	0.13534	0.12462	0.12836	0.13623	0.14363	0.14567	0.14144	0.12388	0.12528	0.12492	0.13165	0.1283	0.13696	0.14094	0.14164	0.12935	0.12836	0.12974	0.14265	0.14474	0.1441	0.14569	0.15936	0.14171	0.12694	0.12313	0.12772	0.12552	0.1257	0.12888	0.14288	0.14177	0.14286	0.14357	0.1429	0.14209	0.14504	0.14162	0.13929	0.13862	0.13939
929	0.12547	0.12568	0.12504	0.126	0.12664	0.12733	0.12549	0.13357	0.13861	0.12739	0.13129	0.13939	0.14728	0.14947	0.14492	0.12664	0.1281	0.12771	0.13469	0.13124	0.14019	0.14438	0.14511	0.13228	0.13129	0.13268	0.14614	0.14839	0.14769	0.14943	0.16395	0.14516	0.12985	0.12587	0.13067	0.12838	0.12856	0.13176	0.14643	0.14529	0.14641	0.14718	0.14643	0.14556	0.14876	0.14505	0.14261	0.14188	0.14276
930	0.12833	0.12852	0.12786	0.12889	0.12957	0.13024	0.12828	0.13666	0.14203	0.13025	0.13433	0.14266	0.1511	0.15347	0.14856	0.12949	0.13101	0.13059	0.13783	0.13426	0.14354	0.14799	0.14874	0.13531	0.1343	0.13573	0.14979	0.15223	0.15145	0.15338	0.16887	0.14877	0.13285	0.1287	0.13371	0.13133	0.13151	0.13473	0.15015	0.14898	0.15013	0.15099	0.15014	0.14919	0.15266	0.14864	0.14608	0.14526	0.14628
931	0.13126	0.13145	0.13075	0.13187	0.13258	0.13325	0.13114	0.13986	0.14558	0.13319	0.13746	0.14607	0.15513	0.1577	0.15238	0.13241	0.13401	0.13355	0.14109	0.13739	0.14704	0.15176	0.15255	0.13844	0.13742	0.13888	0.15361	0.15628	0.15541	0.15755	0.17416	0.15254	0.13595	0.1316	0.13686	0.13438	0.13456	0.13779	0.15405	0.15285	0.15403	0.15499	0.15403	0.153	0.15679	0.1524	0.1497	0.1488	0.14995
932	0.13429	0.13447	0.13374	0.13495	0.13571	0.13636	0.1341	0.14318	0.14931	0.13623	0.14072	0.14963	0.15939	0.16219	0.15642	0.13543	0.13711	0.1366	0.14449	0.14064	0.1507	0.15573	0.15656	0.14168	0.14065	0.14215	0.15765	0.16057	0.1596	0.16197	0.1799	0.15653	0.13917	0.1346	0.14013	0.13753	0.13772	0.14097	0.15818	0.15694	0.15816	0.15922	0.15815	0.15702	0.16116	0.15637	0.15351	0.1525	0.15382
933	0.13743	0.13759	0.13683	0.13815	0.13894	0.13958	0.13715	0.14664	0.15323	0.13937	0.1441	0.15336	0.16392	0.16698	0.16068	0.13855	0.14032	0.13976	0.14803	0.14402	0.15454	0.15993	0.16081	0.14506	0.14401	0.14555	0.16193	0.16513	0.16405	0.16669	0.18615	0.16073	0.14251	0.13769	0.14353	0.1408	0.14099	0.14427	0.16256	0.16127	0.16253	0.16372	0.16251	0.16127	0.16582	0.16056	0.15751	0.15639	0.1579
934	0.14068	0.14083	0.14003	0.14146	0.1423	0.14292	0.1403	0.15026	0.15737	0.14262	0.14763	0.15728	0.16876	0.17212	0.16521	0.14179	0.14366	0.14305	0.15174	0.14754	0.15859	0.16439	0.16532	0.14857	0.14751	0.1491	0.16648	0.17001	0.1688	0.17175	0.19303	0.1652	0.14599	0.14089	0.14707	0.14421	0.14439	0.1477	0.16722	0.16587	0.1672	0.16852	0.16715	0.16579	0.17081	0.16501	0.16175	0.16049	0.16221
935	0.14406	0.1442	0.14335	0.14491	0.14581	0.14641	0.14357	0.15406	0.16175	0.14601	0.15132	0.16141	0.17396	0.17768	0.17005	0.14515	0.14713	0.14646	0.15563	0.15122	0.16287	0.16914	0.17014	0.15226	0.15118	0.15282	0.17135	0.17525	0.1739	0.1772	0.20066	0.16998	0.14963	0.14422	0.15078	0.14776	0.14794	0.15128	0.17222	0.1708	0.17219	0.17367	0.17213	0.17062	0.17618	0.16976	0.16625	0.16485	0.16681
936	0.14759	0.1477	0.14681	0.14851	0.14948	0.15006	0.14697	0.15805	0.16642	0.14954	0.15519	0.1658	0.17957	0.18371	0.17525	0.14865	0.15076	0.15002	0.15974	0.15508	0.16743	0.17425	0.17533	0.15612	0.15502	0.15672	0.17659	0.18094	0.17942	0.18313	0.20923	0.17511	0.15345	0.14769	0.15468	0.15147	0.15166	0.15503	0.17761	0.1761	0.17758	0.17924	0.1775	0.17582	0.18201	0.17486	0.17107	0.16949	0.17173
937	0.15128	0.15137	0.15043	0.15229	0.15332	0.15388	0.15052	0.16227	0.17141	0.15324	0.15928	0.17048	0.18569	0.19031	0.18088	0.15232	0.15457	0.15376	0.16409	0.15916	0.1723	0.17976	0.18093	0.16019	0.15907	0.16084	0.18227	0.18713	0.18542	0.18961	0.21894	0.18065	0.15747	0.15131	0.1588	0.15538	0.15557	0.15898	0.18346	0.18184	0.18342	0.18531	0.18333	0.18144	0.18838	0.18037	0.17625	0.17447	0.17702
938	0.15516	0.15523	0.15422	0.15627	0.15738	0.15791	0.15424	0.16676	0.17678	0.15712	0.16361	0.1755	0.19239	0.1976	0.18702	0.15617	0.15858	0.15768	0.16872	0.16347	0.17754	0.18576	0.18704	0.16451	0.16335	0.1652	0.18848	0.19396	0.19201	0.19677	0.23011	0.1867	0.16172	0.15511	0.16315	0.1595	0.1597	0.16316	0.18987	0.18811	0.18982	0.19196	0.18971	0.18758	0.1954	0.18639	0.18185	0.17985	0.18276
939	0.15925	0.15929	0.15821	0.16047	0.16167	0.16218	0.15815	0.17155	0.18261	0.16121	0.16821	0.18093	0.19981	0.20573	0.19376	0.16023	0.16281	0.16182	0.17368	0.16806	0.18322	0.19234	0.19376	0.1691	0.16791	0.16986	0.19532	0.20154	0.19932	0.20476	0.24315	0.19335	0.16624	0.15912	0.16779	0.16386	0.16407	0.16759	0.19694	0.195	0.19689	0.19932	0.19675	0.19433	0.20321	0.193	0.18797	0.1857	0.18903
940	0.16358	0.16358	0.16243	0.16493	0.16623	0.1667	0.16227	0.17669	0.18897	0.16555	0.17314	0.18683	0.20811	0.21489	0.20124	0.16452	0.16732	0.16622	0.17902	0.17297	0.18942	0.19962	0.20121	0.17402	0.17278	0.17484	0.20295	0.21005	0.2075	0.21377	0.25863	0.20074	0.17106	0.16335	0.17276	0.16851	0.16872	0.17232	0.20483	0.20266	0.20477	0.20756	0.20461	0.20184	0.212	0.20034	0.19471	0.19213	0.19595
941	0.16819	0.16816	0.16691	0.16968	0.1711	0.17154	0.16665	0.18226	0.19596	0.17017	0.17845	0.19331	0.21748	0.22533	0.20962	0.16909	0.17213	0.1709	0.18482	0.17825	0.19625	0.20777	0.20958	0.17931	0.17803	0.18021	0.21155	0.21973	0.21678	0.22405	0.27736	0.20903	0.17624	0.16784	0.1781	0.17349	0.17371	0.17741	0.21373	0.21126	0.21367	0.21687	0.21348	0.21028	0.222	0.20858	0.20221	0.19926	0.20365
942	0.17313	0.17305	0.1717	0.17478	0.17634	0.17674	0.17131	0.18832	0.20372	0.17512	0.1842	0.20049	0.22821	0.23739	0.21914	0.17398	0.1773	0.17593	0.19116	0.18398	0.20385	0.217	0.21908	0.18506	0.1837	0.18605	0.22137	0.23089	0.22746	0.23595	0.30049	0.21847	0.18184	0.17265	0.1839	0.17885	0.17908	0.18291	0.22391	0.22103	0.22383	0.22755	0.22363	0.2199	0.23356	0.21796	0.21066	0.20726	0.21234
943	0.17844	0.17831	0.17684	0.18029	0.18201	0.18236	0.17631	0.19498	0.21243	0.18045	0.19048	0.20855	0.24068	0.25153	0.23009	0.17925	0.18289	0.18136	0.19816	0.19023	0.21242	0.22759	0.23004	0.19134	0.1899	0.19245	0.23276	0.24397	0.23994	0.24997	0.3297	0.22939	0.18794	0.17781	0.19023	0.18467	0.18491	0.18891	0.23572	0.23229	0.23563	0.23998	0.23542	0.23101	0.24711	0.2288	0.22031	0.21638	0.22227
944	0.1842	0.18402	0.1824	0.18627	0.18818	0.18849	0.18171	0.20238	0.22231	0.18625	0.1974	0.21772	0.25539	0.26839	0.24289	0.18497	0.18899	0.18727	0.20598	0.19712	0.22219	0.23994	0.24287	0.19828	0.19673	0.19953	0.24622	0.25958	0.2548	0.26677	0.36742	0.24224	0.19464	0.1834	0.19721	0.19103	0.19129	0.19552	0.24966	0.24547	0.24955	0.25469	0.24935	0.24408	0.26331	0.24155	0.23152	0.22692	0.2338
945	0.1905	0.19025	0.18847	0.19283	0.19496	0.19522	0.18759	0.21068	0.23366	0.1926	0.20512	0.2283	0.27307	0.28886	0.25814	0.19122	0.19569	0.19375	0.2148	0.20478	0.23352	0.25461	0.2582	0.20604	0.20433	0.20744	0.26243	0.27859	0.27285	0.28732	0.41709	0.25768	0.20208	0.18951	0.20498	0.19805	0.19833	0.20288	0.26643	0.26118	0.26631	0.27242	0.26614	0.25975	0.28305	0.25685	0.24478	0.23936	0.24745
946	0.19745	0.19712	0.19513	0.20008	0.20248	0.20269	0.19404	0.22011	0.2469	0.19962	0.21381	0.24074	0.29473	0.31421	0.27666	0.19812	0.20315	0.20094	0.2249	0.21342	0.24691	0.27239	0.27688	0.2148	0.21289	0.21641	0.28243	0.30228	0.29531	0.31303	0.48313	0.27667	0.21041	0.19623	0.21373	0.20588	0.20619	0.21118	0.28706	0.28028	0.28691	0.29427	0.28683	0.27896	0.30765	0.27566	0.26081	0.25436	0.26395
947	0.20518	0.20477	0.20253	0.20819	0.21091	0.21107	0.20119	0.231	0.2626	0.20748	0.22374	0.25568	0.32186	0.34626	0.2997	0.20583	0.21153	0.20901	0.23667	0.22329	0.26305	0.29446	0.30023	0.22487	0.22266	0.22674	0.30774	0.33254	0.32396	0.34598	0.56979	0.30067	0.21989	0.20371	0.22371	0.21471	0.21506	0.22069	0.31305	0.30404	0.31287	0.32182	0.31296	0.30311	0.33907	0.2994	0.28072	0.27294	0.28441
948	0.2139	0.21338	0.21085	0.21735	0.22047	0.22059	0.20922	0.24378	0.28154	0.21641	0.23528	0.27406	0.35661	0.38758	0.32908	0.21456	0.22108	0.21819	0.25063	0.23474	0.283	0.32255	0.33018	0.23663	0.23401	0.23883	0.34067	0.3722	0.36149	0.3892	0.67651	0.33193	0.23081	0.21214	0.23528	0.2248	0.22522	0.23178	0.34664	0.33432	0.34642	0.35743	0.34683	0.3343	0.38019	0.33024	0.30616	0.29664	0.31052
949	0.22386	0.22323	0.22032	0.22785	0.23147	0.23156	0.21837	0.25907	0.30488	0.22668	0.24892	0.29728	0.40203	0.44169	0.36751	0.22457	0.23215	0.22881	0.26758	0.24827	0.30834	0.3593	0.36966	0.25065	0.24744	0.25329	0.38472	0.42537	0.4119	0.44701	0.78885	0.37388	0.24363	0.22179	0.24892	0.23654	0.23705	0.245	0.39119	0.37392	0.39091	0.40453	0.3919	0.37572	0.43516	0.37156	0.33975	0.32791	0.34488
950	0.23541	0.23465	0.23126	0.24007	0.24431	0.24442	0.22895	0.27778	0.33423	0.23875	0.26542	0.32748	0.46223	0.51284	0.419	0.23627	0.24522	0.24131	0.28867	0.26463	0.34146	0.40864	0.42302	0.26779	0.26369	0.27101	0.44499	0.49759	0.4807	0.52479	0.87619	0.43163	0.25897	0.233	0.26535	0.25042	0.25106	0.26114	0.45148	0.42687	0.45113	0.46795	0.4531	0.43207	0.50939	0.4284	0.38554	0.3706	0.39152
951	0.24905	0.24816	0.24415	0.25455	0.25959	0.25979	0.24143	0.30126	0.37196	0.25322	0.28586	0.3679	0.5418	0.6043	0.48897	0.25024	0.26099	0.25638	0.31566	0.28491	0.38607	0.47609	0.49622	0.2893	0.28386	0.29334	0.52802	0.59433	0.57392	0.62666	0.91382	0.51192	0.27777	0.24631	0.28561	0.26722	0.26806	0.28143	0.53351	0.49862	0.53308	0.5533	0.53657	0.50961	0.60778	0.50759	0.44969	0.43062	0.45641
952	0.26549	0.26446	0.25964	0.27205	0.27815	0.27858	0.25649	0.33152	0.42139	0.27104	0.31192	0.42325	0.64273	0.71292	0.58299	0.26731	0.28051	0.27502	0.35124	0.31078	0.4475	0.56788	0.59525	0.31719	0.30964	0.32239	0.63845	0.71446	0.69244	0.74738	0.90629	0.6204	0.30142	0.26247	0.31126	0.28805	0.28918	0.30777	0.64143	0.59458	0.64094	0.66331	0.64629	0.61391	0.72766	0.61526	0.5401	0.51593	0.54696
953	0.28578	0.28464	0.27871	0.29373	0.30122	0.30213	0.27515	0.37163	0.48685	0.29363	0.34615	0.49932	0.7562	0.82022	0.70058	0.28879	0.30542	0.29877	0.3994	0.34484	0.53222	0.68534	0.71866	0.35453	0.34371	0.36146	0.76776	0.8366	0.81835	0.86035	0.87244	0.75104	0.33206	0.28266	0.34468	0.31461	0.31619	0.34307	0.76729	0.71347	0.76683	0.78698	0.77325	0.74059	0.8459	0.74647	0.6616	0.63272	0.66712
954	0.31147	0.31031	0.30285	0.32126	0.33066	0.33248	0.299	0.42605	0.57268	0.32322	0.39242	0.60003	0.85522	0.89492	0.82233	0.3167	0.33824	0.33005	0.46559	0.39115	0.64341	0.81147	0.84269	0.40608	0.39016	0.41554	0.88101	0.91972	0.91078	0.92731	0.82577	0.87128	0.37294	0.30868	0.38945	0.34953	0.35182	0.39157	0.87866	0.83414	0.87837	0.89017	0.88343	0.86062	0.92286	0.86919	0.80047	0.7716	0.80269
955	0.34499	0.34399	0.33437	0.35724	0.36925	0.37275	0.33052	0.50067	0.67906	0.36334	0.45623	0.71896	0.90894	0.91907	0.90841	0.35422	0.38296	0.37268	0.55547	0.4556	0.76912	0.90546	0.9236	0.4784	0.45506	0.49142	0.93709	0.94149	0.94127	0.93658	0.7735	0.93681	0.42879	0.3434	0.45063	0.39683	0.40019	0.45862	0.93594	0.91609	0.93588	0.93784	0.93778	0.93042	0.94029	0.93744	0.91119	0.89131	0.91013
956	0.39002	0.38959	0.37689	0.40558	0.42118	0.42764	0.37366	0.60052	0.79266	0.41938	0.54396	0.82936	0.91259	0.90272	0.93456	0.40637	0.44556	0.43238	0.66944	0.54543	0.87331	0.93783	0.94112	0.5781	0.54573	0.59526	0.93389	0.91843	0.92263	0.90805	0.71933	0.93976	0.50573	0.39136	0.53415	0.46239	0.46721	0.54883	0.93501	0.93752	0.93509	0.93133	0.9345	0.93796	0.91572	0.94164	0.9533	0.94611	0.95148
957	0.45209	0.45293	0.43597	0.47201	0.4923	0.50348	0.43452	0.72168	0.88249	0.49871	0.65815	0.896	0.88386	0.8641	0.9145	0.48039	0.53369	0.51671	0.79136	0.66402	0.92153	0.92032	0.91473	0.70391	0.66546	0.72331	0.89721	0.87364	0.87949	0.86156	0.6651	0.90561	0.60889	0.45941	0.64324	0.55328	0.55971	0.6608	0.90002	0.91447	0.90016	0.89434	0.89835	0.90649	0.8708	0.90772	0.93716	0.93803	0.93632
958	0.53845	0.54158	0.51932	0.56348	0.58899	0.6063	0.52121	0.83854	0.92178	0.60796	0.78537	0.90828	0.83906	0.81496	0.87137	0.58426	0.65225	0.63155	0.88499	0.79687	0.91616	0.87782	0.8679	0.83142	0.79902	0.84712	0.84579	0.81943	0.82569	0.8073	0.61171	0.85504	0.73407	0.55609	0.76828	0.67288	0.68004	0.77846	0.84977	0.86982	0.84993	0.84367	0.84754	0.8574	0.81701	0.85709	0.89309	0.89743	0.89337
959	0.65431	0.66042	0.63378	0.68322	0.71156	0.73305	0.63979	0.9113	0.91402	0.74186	0.88791	0.88332	0.78704	0.76148	0.81808	0.71759	0.78886	0.76803	0.92248	0.90176	0.88052	0.82441	0.81234	0.91574	0.90327	0.92228	0.78821	0.76163	0.76768	0.75021	0.55952	0.79757	0.85402	0.68513	0.87655	0.80635	0.81159	0.86948	0.79314	0.8158	0.79329	0.78734	0.7906	0.80084	0.75988	0.79944	0.83741	0.84313	0.83866
960	0.78957	0.79708	0.77239	0.8161	0.83925	0.8564	0.77948	0.92527	0.87884	0.86662	0.93192	0.83935	0.73234	0.70678	0.76081	0.85224	0.90089	0.88693	0.911	0.94269	0.83081	0.76671	0.75356	0.93552	0.94266	0.93404	0.72859	0.70299	0.70853	0.69263	0.50859	0.73767	0.92681	0.82661	0.93134	0.91072	0.91144	0.90864	0.73438	0.75828	0.73453	0.72923	0.73164	0.74163	0.70202	0.73936	0.77723	0.78325	0.77933
961	0.9037	0.90827	0.89562	0.91858	0.92777	0.93175	0.89694	0.89905	0.83061	0.93492	0.92232	0.78649	0.67721	0.65238	0.70251	0.93604	0.94724	0.94302	0.8726	0.92845	0.77496	0.70783	0.69411	0.91005	0.92717	0.90461	0.6688	0.64475	0.64963	0.63561	0.45886	0.67739	0.93798	0.92836	0.9299	0.94958	0.94648	0.90035	0.67546	0.70002	0.67559	0.67113	0.67252	0.68199	0.64461	0.67889	0.71577	0.72158	0.71869
962	0.95328	0.95262	0.95413	0.95481	0.95108	0.94326	0.9472	0.85334	0.77675	0.93794	0.88369	0.72984	0.62273	0.59898	0.64452	0.94885	0.93464	0.93644	0.82162	0.88639	0.71684	0.64919	0.63514	0.86327	0.88437	0.85619	0.60968	0.58748	0.59162	0.57963	0.41022	0.61764	0.90878	0.95623	0.89532	0.93323	0.92868	0.86417	0.61727	0.6423	0.61738	0.61385	0.6141	0.62291	0.58818	0.61896	0.65445	0.65975	0.65816
963	0.94213	0.93804	0.94693	0.93646	0.9268	0.91332	0.9355	0.79888	0.72098	0.90276	0.83189	0.67195	0.56936	0.54684	0.58746	0.91698	0.89235	0.89658	0.76518	0.83228	0.65831	0.59143	0.57716	0.8072	0.82978	0.79951	0.55164	0.53141	0.53477	0.52483	0.36264	0.55883	0.86076	0.93068	0.84546	0.88973	0.88489	0.81429	0.5602	0.58564	0.56029	0.55773	0.55677	0.56486	0.53291	0.56001	0.5939	0.59853	0.59839
964	0.90003	0.8944	0.90566	0.89177	0.8802	0.86445	0.89265	0.74091	0.6651	0.85088	0.77445	0.61405	0.51724	0.49597	0.53155	0.86593	0.83747	0.84256	0.70676	0.77325	0.60026	0.53481	0.52036	0.74744	0.77041	0.73963	0.49481	0.47656	0.47916	0.47122	0.31631	0.50112	0.80456	0.88169	0.78899	0.83468	0.8299	0.7581	0.50438	0.53024	0.50445	0.50286	0.50065	0.508	0.47881	0.50219	0.53439	0.53827	0.53965
965	0.84534	0.83893	0.85081	0.83631	0.82434	0.80763	0.83711	0.68197	0.60994	0.79203	0.71507	0.55676	0.46633	0.44626	0.47686	0.80705	0.77755	0.78276	0.64802	0.71269	0.54307	0.47941	0.46481	0.68662	0.70957	0.67892	0.43927	0.42295	0.42484	0.41875	0.27174	0.44461	0.7453	0.82334	0.73016	0.77513	0.77051	0.69932	0.44982	0.47609	0.44987	0.44921	0.44578	0.45241	0.42584	0.44559	0.47605	0.47916	0.48203
966	0.78567	0.7788	0.79058	0.77669	0.76501	0.74788	0.77646	0.62323	0.55585	0.73067	0.65543	0.50038	0.41657	0.39763	0.42338	0.74534	0.71609	0.72105	0.58975	0.65211	0.48691	0.42523	0.41054	0.62595	0.64872	0.61847	0.38513	0.37065	0.3719	0.36749	0.22987	0.3894	0.68532	0.76148	0.67091	0.71429	0.70986	0.63982	0.39656	0.42314	0.39659	0.39678	0.39222	0.39815	0.37405	0.39035	0.41898	0.42134	0.42558
967	0.72435	0.71715	0.72848	0.71586	0.70479	0.68745	0.71399	0.56526	0.50291	0.66874	0.59629	0.44506	0.36793	0.35007	0.3712	0.68296	0.65454	0.65907	0.53231	0.59217	0.43188	0.37239	0.35772	0.56597	0.58851	0.55876	0.3327	0.31999	0.3207	0.31772	0.19201	0.33585	0.62565	0.69865	0.61211	0.65353	0.64927	0.58046	0.34478	0.37145	0.3448	0.34571	0.34021	0.34547	0.3237	0.33679	0.36342	0.36509	0.37049
968	0.66298	0.65549	0.66623	0.6552	0.64486	0.62734	0.65132	0.50828	0.45109	0.60714	0.53799	0.391	0.32061	0.30385	0.32064	0.62089	0.59358	0.59758	0.47585	0.53315	0.37812	0.32122	0.30679	0.50693	0.52922	0.50002	0.28264	0.27165	0.27194	0.27012	0.15949	0.28465	0.56675	0.63603	0.55414	0.59346	0.58936	0.52169	0.29499	0.3213	0.295	0.29647	0.2903	0.2949	0.27545	0.2856	0.30991	0.31099	0.31723
969	0.60241	0.59462	0.60472	0.59541	0.58585	0.56813	0.58929	0.45245	0.40035	0.54637	0.48071	0.33852	0.27511	0.25961	0.27237	0.55969	0.53358	0.537	0.42048	0.47521	0.32601	0.27241	0.25859	0.44902	0.47103	0.44242	0.23603	0.22676	0.22675	0.22582	0.13319	0.23696	0.50885	0.57424	0.49718	0.53439	0.53044	0.4638	0.2481	0.27331	0.2481	0.24992	0.24348	0.2474	0.23039	0.2379	0.25943	0.26004	0.26666
970	0.54292	0.5348	0.54426	0.53673	0.52795	0.50998	0.52824	0.3979	0.35078	0.48665	0.42455	0.28827	0.23237	0.2184	0.22752	0.49956	0.47469	0.47752	0.36643	0.41846	0.27629	0.22714	0.21443	0.39243	0.41407	0.38614	0.19432	0.18682	0.18664	0.18631	0.11317	0.19435	0.45202	0.51351	0.44129	0.47645	0.47262	0.40705	0.20546	0.2286	0.20545	0.20739	0.20113	0.20438	0.19003	0.19524	0.21345	0.21372	0.22019
971	0.48458	0.47612	0.48495	0.47918	0.47117	0.45296	0.46832	0.34489	0.30273	0.42814	0.36972	0.24132	0.1937	0.18163	0.18758	0.44065	0.41703	0.4193	0.31417	0.36313	0.23015	0.18693	0.17586	0.33755	0.35859	0.33162	0.15901	0.15326	0.15301	0.15305	0.098699	0.15841	0.3964	0.45396	0.38659	0.41968	0.416	0.35182	0.1686	0.18866	0.16859	0.17043	0.16481	0.16737	0.15588	0.1592	0.17367	0.17373	0.17954
972	0.42746	0.41869	0.42689	0.42283	0.41556	0.39718	0.40973	0.29403	0.25696	0.37113	0.31668	0.19913	0.16049	0.15061	0.154	0.38317	0.36087	0.36265	0.26459	0.30976	0.18916	0.15323	0.14422	0.28516	0.3052	0.27968	0.13101	0.12687	0.12661	0.12685	0.088661	0.13008	0.34227	0.39579	0.33341	0.36432	0.3608	0.29883	0.13869	0.15497	0.13868	0.14026	0.1356	0.1375	0.12885	0.13072	0.14145	0.14139	0.14619
973	0.37177	0.36278	0.37033	0.36784	0.36129	0.34295	0.35285	0.24633	0.21468	0.31618	0.26635	0.16322	0.13367	0.12605	0.12756	0.32762	0.30684	0.30818	0.21907	0.25936	0.15482	0.1268	0.11991	0.23652	0.25496	0.23162	0.11018	0.10737	0.10713	0.10746	0.081951	0.10916	0.29034	0.33944	0.28247	0.31089	0.30757	0.24923	0.11595	0.12835	0.11594	0.11721	0.11358	0.11493	0.10878	0.10963	0.11709	0.11699	0.12066
974	0.31798	0.30895	0.31582	0.31469	0.30886	0.29094	0.29843	0.20323	0.17739	0.26433	0.22013	0.13453	0.11328	0.10771	0.10797	0.27493	0.25601	0.25699	0.17925	0.21344	0.12787	0.10729	0.10229	0.1933	0.20941	0.18914	0.095443	0.093652	0.093441	0.0938	0.077689	0.094471	0.24178	0.28573	0.23501	0.26038	0.25734	0.20462	0.099603	0.10858	0.099593	0.10057	0.097857	0.098773	0.094623	0.094812	0.099708	0.099598	0.10227
975	0.26699	0.25823	0.26431	0.26427	0.2592	0.24229	0.24766	0.1663	0.14638	0.2171	0.17971	0.11301	0.098577	0.094682	0.094175	0.2265	0.20996	0.21064	0.14653	0.17372	0.10799	0.093596	0.090088	0.1571	0.17027	0.15378	0.085433	0.08437	0.084186	0.084557	0.075212	0.084563	0.19821	0.23599	0.19265	0.21428	0.21163	0.16662	0.08835	0.09463	0.088341	0.089073	0.087098	0.087693	0.085027	0.084796	0.087852	0.087747	0.089638
976	0.2202	0.21211	0.21727	0.21801	0.21376	0.19862	0.20217	0.13661	0.12222	0.17623	0.14652	0.097706	0.088411	0.085791	0.084825	0.18408	0.17042	0.17087	0.12138	0.14154	0.094059	0.08434	0.081939	0.12878	0.1388	0.12631	0.078866	0.078318	0.078154	0.078532	0.074036	0.078105	0.16129	0.19197	0.15701	0.17433	0.17216	0.13631	0.080874	0.085163	0.080867	0.081419	0.079989	0.080354	0.078757	0.078257	0.080029	0.079934	0.081254
977	0.17931	0.17233	0.17647	0.17764	0.17426	0.16158	0.1637	0.11425	0.10449	0.14311	0.12108	0.087247	0.081637	0.079957	0.078711	0.1492	0.13867	0.13895	0.10319	0.1172	0.08464	0.078303	0.076703	0.10802	0.11516	0.10629	0.074767	0.074585	0.074434	0.074817	0.073806	0.074101	0.13206	0.15531	0.12899	0.14191	0.14026	0.11368	0.076117	0.078963	0.076111	0.076532	0.075502	0.075699	0.074872	0.074194	0.075067	0.074981	0.075892
978	0.14581	0.14022	0.14331	0.1446	0.1421	0.13224	0.13331	0.098313	0.092074	0.11808	0.10274	0.080337	0.077337	0.076346	0.074923	0.12247	0.11489	0.11505	0.090624	0.099863	0.078493	0.074576	0.073555	0.093573	0.098424	0.092415	0.07244	0.072521	0.072381	0.072768	0.074263	0.071854	0.11042	0.12687	0.10836	0.11737	0.11621	0.097694	0.073313	0.075111	0.073308	0.073634	0.072897	0.072971	0.072703	0.071903	0.072139	0.07206	0.072677
979	0.12021	0.11604	0.11819	0.1194	0.11767	0.11051	0.11089	0.087415	0.083703	0.10027	0.090123	0.075978	0.074838	0.07435	0.072815	0.10326	0.098095	0.098164	0.082239	0.088037	0.07469	0.072514	0.071915	0.083876	0.08705	0.083127	0.071394	0.071664	0.071531	0.071923	0.075216	0.070872	0.095251	0.10623	0.093953	0.099899	0.099119	0.086835	0.07192	0.072954	0.071915	0.072173	0.07165	0.071634	0.071772	0.07089	0.070672	0.070599	0.071003
980	0.10184	0.09889	0.1003	0.10133	0.10022	0.095262	0.095229	0.080208	0.078276	0.08814	0.081725	0.073459	0.073649	0.073529	0.071923	0.090074	0.086704	0.086721	0.076849	0.080225	0.072575	0.071656	0.071363	0.077578	0.079563	0.077118	0.071271	0.071678	0.07155	0.071946	0.076529	0.070802	0.085014	0.091987	0.084253	0.087983	0.087486	0.079697	0.071546	0.072025	0.071541	0.07175	0.071383	0.071301	0.071736	0.070796	0.070254	0.070186	0.070438
981	0.089242	0.087226	0.088098	0.08895	0.088281	0.084973	0.084696	0.075649	0.074978	0.080134	0.076339	0.072269	0.073412	0.073561	0.071908	0.081325	0.079219	0.079203	0.073601	0.075264	0.071682	0.071667	0.071596	0.073693	0.074834	0.073438	0.071814	0.072319	0.072194	0.072595	0.078101	0.071385	0.07833	0.082493	0.077942	0.080116	0.079819	0.075208	0.071906	0.071983	0.071902	0.072075	0.071823	0.071692	0.072342	0.071362	0.070591	0.070525	0.070669
982	0.080893	0.07955	0.080047	0.080753	0.080393	0.07826	0.077838	0.072999	0.073226	0.075057	0.07311	0.072043	0.073867	0.074211	0.072528	0.075725	0.074509	0.074472	0.071901	0.072343	0.071672	0.072307	0.072396	0.071542	0.07208	0.071434	0.072835	0.073413	0.073289	0.073695	0.079863	0.072439	0.07418	0.076376	0.074054	0.075131	0.074975	0.072622	0.072797	0.072583	0.072794	0.072942	0.072771	0.072605	0.073413	0.072403	0.071469	0.071405	0.071472
983	0.075566	0.074702	0.074938	0.075532	0.075387	0.074088	0.073574	0.071722	0.072593	0.072056	0.071425	0.07251	0.074822	0.075309	0.073606	0.072353	0.071769	0.071718	0.071313	0.070882	0.072296	0.073398	0.073603	0.070634	0.07074	0.070631	0.074201	0.074831	0.074708	0.075119	0.081763	0.07383	0.071836	0.072641	0.071896	0.072193	0.072138	0.0714	0.07407	0.073645	0.074066	0.074197	0.074085	0.073892	0.074816	0.073785	0.072735	0.072671	0.072685
984	0.072384	0.071862	0.071914	0.072425	0.072432	0.071728	0.071155	0.071436	0.072766	0.07054	0.070851	0.073474	0.076137	0.076728	0.07501	0.070572	0.07044	0.07038	0.071524	0.070471	0.073375	0.074813	0.075101	0.070619	0.070414	0.070691	0.075812	0.076482	0.076358	0.076776	0.083764	0.075461	0.07079	0.070602	0.070983	0.070722	0.070739	0.071158	0.075615	0.075039	0.075611	0.075732	0.075661	0.075448	0.076459	0.075409	0.074278	0.074213	0.074191
985	0.070738	0.070463	0.070382	0.070833	0.070947	0.070671	0.070058	0.071862	0.073521	0.070091	0.071074	0.074794	0.07771	0.078379	0.076649	0.069933	0.070125	0.070058	0.072308	0.070811	0.074779	0.076459	0.076807	0.071242	0.070816	0.071369	0.077598	0.078299	0.078173	0.078599	0.085841	0.077264	0.070676	0.069779	0.070963	0.070304	0.070372	0.071618	0.077355	0.07667	0.077351	0.077465	0.077423	0.077194	0.078271	0.077206	0.076017	0.07595	0.075905
986	0.070203	0.070104	0.06993	0.070336	0.070528	0.070556	0.069916	0.072801	0.074695	0.070411	0.071872	0.07637	0.079472	0.080197	0.078457	0.070118	0.07054	0.070468	0.073505	0.071694	0.076418	0.078272	0.078662	0.072325	0.071743	0.072491	0.07951	0.080237	0.080107	0.080542	0.087976	0.079189	0.071235	0.069833	0.071588	0.070646	0.070751	0.072583	0.079236	0.078474	0.079232	0.079342	0.07932	0.079079	0.080208	0.079126	0.077897	0.077827	0.077769
987	0.070458	0.070485	0.070245	0.070618	0.070864	0.07111	0.070452	0.074106	0.07617	0.071276	0.073078	0.078129	0.081368	0.082138	0.080386	0.070887	0.071474	0.071399	0.074995	0.072961	0.078223	0.080204	0.080626	0.073735	0.073042	0.073928	0.081513	0.082261	0.082128	0.082572	0.090159	0.081202	0.072271	0.070511	0.072672	0.071528	0.071659	0.073906	0.081218	0.0804	0.081214	0.081323	0.081312	0.081062	0.082233	0.081135	0.079877	0.079803	0.079739
[truncated: 213 more rows]
[truncated: 92 more columns]
