# Supplementary material for: Causality Analysis and Cell Network Modeling of Spatial Calcium Signaling Patterns in Liver Lobules
Source: Front Physiol. 2018 Oct 4;9:1377. doi: 10.3389/fphys.2018.01377 (PMC6180170; doi:10.3389/fphys.2018.01377)
Supplement: Supplementary file 1 [file Data_Sheet_1.ZIP › Vadigepalli-Supplementary-Data-Code/Fig7C_data.txt]

Time (sec)	Cell 1	Cell 2	Cell 3	Cell 4	Cell 5	Cell 6	Cell 7	Cell 8	Cell 9	Cell 10	Cell 11	Cell 12	Cell 13	Cell 14	Cell 15	Cell 16	Cell 17	Cell 18	Cell 19	Cell 20	Cell 21	Cell 22	Cell 23	Cell 24	Cell 25	Cell 26	Cell 27	Cell 28	Cell 29	Cell 30	Cell 31	Cell 32	Cell 33	Cell 34	Cell 35	Cell 36	Cell 37	Cell 38	Cell 39	Cell 40	Cell 41	Cell 42	Cell 43	Cell 44	Cell 45	Cell 46	Cell 47	Cell 48	Cell 49
1	0.2	0.2	0.2	0.2	0.2	0.2	0.2	0.2	0.2	0.2	0.2	0.2	0.2	0.2	0.2	0.2	0.2	0.2	0.2	0.2	0.2	0.2	0.2	0.2	0.2	0.2	0.2	0.2	0.2	0.2	0.2	0.2	0.2	0.2	0.2	0.2	0.2	0.2	0.2	0.2	0.2	0.2	0.2	0.2	0.2	0.2	0.2	0.2	0.2
2	0.205161179	0.205161179	0.205161179	0.205161179	0.205161179	0.205161179	0.205161179	0.205161179	0.205161179	0.205161179	0.205161179	0.205161179	0.205161179	0.205161179	0.205161179	0.205161179	0.205161179	0.205161179	0.205161179	0.205161179	0.205161179	0.205161179	0.205161179	0.205161179	0.205161179	0.205161179	0.205161179	0.205161179	0.205161179	0.205161179	0.205161179	0.205161179	0.205161179	0.205161179	0.205161179	0.205161179	0.205161179	0.205161179	0.205161179	0.205161179	0.205161179	0.205161179	0.205161179	0.205161179	0.205161179	0.205161179	0.205161179	0.205161179	0.205161179
3	0.208696131	0.208696131	0.208696131	0.208696131	0.208696131	0.208696131	0.208696131	0.208696131	0.208696131	0.208696131	0.208696131	0.208696131	0.208696131	0.208696131	0.208696131	0.208696131	0.208696131	0.208696131	0.208696131	0.208696131	0.208696131	0.208696131	0.208696131	0.208696131	0.208696131	0.208696131	0.208696131	0.208696131	0.208696131	0.208696131	0.208696131	0.208696131	0.208696131	0.208696131	0.208696131	0.208696131	0.208696131	0.208696131	0.208696131	0.208696131	0.208696131	0.208696131	0.208696131	0.208696131	0.208696131	0.208696131	0.208696131	0.208696131	0.208696131
4	0.212180381	0.212180381	0.212180381	0.212180381	0.212180381	0.212180381	0.212180381	0.212180381	0.212180381	0.212180381	0.212180381	0.212180381	0.212180381	0.212180381	0.212180381	0.212180381	0.212180381	0.212180381	0.212180381	0.212180381	0.212180381	0.212180381	0.212180381	0.212180381	0.212180381	0.212180381	0.212180381	0.212180381	0.212180381	0.212180381	0.212180381	0.212180381	0.212180381	0.212180381	0.212180381	0.212180381	0.212180381	0.212180381	0.212180381	0.212180381	0.212180381	0.212180381	0.212180381	0.212180381	0.212180381	0.212180381	0.212180381	0.212180381	0.212180381
5	0.215685706	0.215685706	0.215685706	0.215685706	0.215685706	0.215685706	0.215685706	0.215685706	0.215685706	0.215685706	0.215685706	0.215685706	0.215685706	0.215685706	0.215685706	0.215685706	0.215685706	0.215685706	0.215685706	0.215685706	0.215685706	0.215685706	0.215685706	0.215685706	0.215685706	0.215685706	0.215685706	0.215685706	0.215685706	0.215685706	0.215685706	0.215685706	0.215685706	0.215685706	0.215685706	0.215685706	0.215685706	0.215685706	0.215685706	0.215685706	0.215685706	0.215685706	0.215685706	0.215685706	0.215685706	0.215685706	0.215685706	0.215685706	0.215685706
6	0.219222671	0.219222671	0.219222671	0.219222671	0.219222671	0.219222671	0.219222671	0.219222671	0.219222671	0.219222671	0.219222671	0.219222671	0.219222671	0.219222671	0.219222671	0.219222671	0.219222671	0.219222671	0.219222671	0.219222671	0.219222671	0.219222671	0.219222671	0.219222671	0.219222671	0.219222671	0.219222671	0.219222671	0.219222671	0.219222671	0.219222671	0.219222671	0.219222671	0.219222671	0.219222671	0.219222671	0.219222671	0.219222671	0.219222671	0.219222671	0.219222671	0.219222671	0.219222671	0.219222671	0.219222671	0.219222671	0.219222671	0.219222671	0.219222671
7	0.222790393	0.222790393	0.222790393	0.222790393	0.222790393	0.222790393	0.222790393	0.222790393	0.222790393	0.222790393	0.222790393	0.222790393	0.222790393	0.222790393	0.222790393	0.222790393	0.222790393	0.222790393	0.222790393	0.222790393	0.222790393	0.222790393	0.222790393	0.222790393	0.222790393	0.222790393	0.222790393	0.222790393	0.222790393	0.222790393	0.222790393	0.222790393	0.222790393	0.222790393	0.222790393	0.222790393	0.222790393	0.222790393	0.222790393	0.222790393	0.222790393	0.222790393	0.222790393	0.222790393	0.222790393	0.222790393	0.222790393	0.222790393	0.222790393
8	0.226392902	0.226392902	0.226392902	0.226392902	0.226392902	0.226392902	0.226392902	0.226392902	0.226392902	0.226392902	0.226392902	0.226392902	0.226392902	0.226392902	0.226392902	0.226392902	0.226392902	0.226392902	0.226392902	0.226392902	0.226392902	0.226392902	0.226392902	0.226392902	0.226392902	0.226392902	0.226392902	0.226392902	0.226392902	0.226392902	0.226392902	0.226392902	0.226392902	0.226392902	0.226392902	0.226392902	0.226392902	0.226392902	0.226392902	0.226392902	0.226392902	0.226392902	0.226392902	0.226392902	0.226392902	0.226392902	0.226392902	0.226392902	0.226392902
9	0.230028827	0.230028827	0.230028827	0.230028827	0.230028827	0.230028827	0.230028827	0.230028827	0.230028827	0.230028827	0.230028827	0.230028827	0.230028827	0.230028827	0.230028827	0.230028827	0.230028827	0.230028827	0.230028827	0.230028827	0.230028827	0.230028827	0.230028827	0.230028827	0.230028827	0.230028827	0.230028827	0.230028827	0.230028827	0.230028827	0.230028827	0.230028827	0.230028827	0.230028827	0.230028827	0.230028827	0.230028827	0.230028827	0.230028827	0.230028827	0.230028827	0.230028827	0.230028827	0.230028827	0.230028827	0.230028827	0.230028827	0.230028827	0.230028827
10	0.233697037	0.233697037	0.233697037	0.233697037	0.233697037	0.233697037	0.233697037	0.233697037	0.233697037	0.233697037	0.233697037	0.233697037	0.233697037	0.233697037	0.233697037	0.233697037	0.233697037	0.233697037	0.233697037	0.233697037	0.233697037	0.233697037	0.233697037	0.233697037	0.233697037	0.233697037	0.233697037	0.233697037	0.233697037	0.233697037	0.233697037	0.233697037	0.233697037	0.233697037	0.233697037	0.233697037	0.233697037	0.233697037	0.233697037	0.233697037	0.233697037	0.233697037	0.233697037	0.233697037	0.233697037	0.233697037	0.233697037	0.233697037	0.233697037
11	0.237395749	0.237395749	0.237395749	0.237395749	0.237395749	0.237395749	0.237395749	0.237395749	0.237395749	0.237395749	0.237395749	0.237395749	0.237395749	0.237395749	0.237395749	0.237395749	0.237395749	0.237395749	0.237395749	0.237395749	0.237395749	0.237395749	0.237395749	0.237395749	0.237395749	0.237395749	0.237395749	0.237395749	0.237395749	0.237395749	0.237395749	0.237395749	0.237395749	0.237395749	0.237395749	0.237395749	0.237395749	0.237395749	0.237395749	0.237395749	0.237395749	0.237395749	0.237395749	0.237395749	0.237395749	0.237395749	0.237395749	0.237395749	0.237395749
12	0.241121833	0.241121833	0.241121833	0.241121833	0.241121833	0.241121833	0.241121833	0.241121833	0.241121833	0.241121833	0.241121833	0.241121833	0.241121833	0.241121833	0.241121833	0.241121833	0.241121833	0.241121833	0.241121833	0.241121833	0.241121833	0.241121833	0.241121833	0.241121833	0.241121833	0.241121833	0.241121833	0.241121833	0.241121833	0.241121833	0.241121833	0.241121833	0.241121833	0.241121833	0.241121833	0.241121833	0.241121833	0.241121833	0.241121833	0.241121833	0.241121833	0.241121833	0.241121833	0.241121833	0.241121833	0.241121833	0.241121833	0.241121833	0.241121833
13	0.244872445	0.244872445	0.244872445	0.244872445	0.244872445	0.244872445	0.244872445	0.244872445	0.244872445	0.244872445	0.244872445	0.244872445	0.244872445	0.244872445	0.244872445	0.244872445	0.244872445	0.244872445	0.244872445	0.244872445	0.244872445	0.244872445	0.244872445	0.244872445	0.244872445	0.244872445	0.244872445	0.244872445	0.244872445	0.244872445	0.244872445	0.244872445	0.244872445	0.244872445	0.244872445	0.244872445	0.244872445	0.244872445	0.244872445	0.244872445	0.244872445	0.244872445	0.244872445	0.244872445	0.244872445	0.244872445	0.244872445	0.244872445	0.244872445
14	0.248644124	0.248644124	0.248644124	0.248644124	0.248644124	0.248644124	0.248644124	0.248644124	0.248644124	0.248644124	0.248644124	0.248644124	0.248644124	0.248644124	0.248644124	0.248644124	0.248644124	0.248644124	0.248644124	0.248644124	0.248644124	0.248644124	0.248644124	0.248644124	0.248644124	0.248644124	0.248644124	0.248644124	0.248644124	0.248644124	0.248644124	0.248644124	0.248644124	0.248644124	0.248644124	0.248644124	0.248644124	0.248644124	0.248644124	0.248644124	0.248644124	0.248644124	0.248644124	0.248644124	0.248644124	0.248644124	0.248644124	0.248644124	0.248644124
15	0.252432373	0.252432373	0.252432373	0.252432373	0.252432373	0.252432373	0.252432373	0.252432373	0.252432373	0.252432373	0.252432373	0.252432373	0.252432373	0.252432373	0.252432373	0.252432373	0.252432373	0.252432373	0.252432373	0.252432373	0.252432373	0.252432373	0.252432373	0.252432373	0.252432373	0.252432373	0.252432373	0.252432373	0.252432373	0.252432373	0.252432373	0.252432373	0.252432373	0.252432373	0.252432373	0.252432373	0.252432373	0.252432373	0.252432373	0.252432373	0.252432373	0.252432373	0.252432373	0.252432373	0.252432373	0.252432373	0.252432373	0.252432373	0.252432373
16	0.25623195	0.25623195	0.25623195	0.25623195	0.25623195	0.25623195	0.25623195	0.25623195	0.25623195	0.25623195	0.25623195	0.25623195	0.25623195	0.25623195	0.25623195	0.25623195	0.25623195	0.25623195	0.25623195	0.25623195	0.25623195	0.25623195	0.25623195	0.25623195	0.25623195	0.25623195	0.25623195	0.25623195	0.25623195	0.25623195	0.25623195	0.25623195	0.25623195	0.25623195	0.25623195	0.25623195	0.25623195	0.25623195	0.25623195	0.25623195	0.25623195	0.25623195	0.25623195	0.25623195	0.25623195	0.25623195	0.25623195	0.25623195	0.25623195
17	0.260037375	0.260037375	0.260037375	0.260037375	0.260037375	0.260037375	0.260037375	0.260037375	0.260037375	0.260037375	0.260037375	0.260037375	0.260037375	0.260037375	0.260037375	0.260037375	0.260037375	0.260037375	0.260037375	0.260037375	0.260037375	0.260037375	0.260037375	0.260037375	0.260037375	0.260037375	0.260037375	0.260037375	0.260037375	0.260037375	0.260037375	0.260037375	0.260037375	0.260037375	0.260037375	0.260037375	0.260037375	0.260037375	0.260037375	0.260037375	0.260037375	0.260037375	0.260037375	0.260037375	0.260037375	0.260037375	0.260037375	0.260037375	0.260037375
18	0.263842854	0.263842854	0.263842854	0.263842854	0.263842854	0.263842854	0.263842854	0.263842854	0.263842854	0.263842854	0.263842854	0.263842854	0.263842854	0.263842854	0.263842854	0.263842854	0.263842854	0.263842854	0.263842854	0.263842854	0.263842854	0.263842854	0.263842854	0.263842854	0.263842854	0.263842854	0.263842854	0.263842854	0.263842854	0.263842854	0.263842854	0.263842854	0.263842854	0.263842854	0.263842854	0.263842854	0.263842854	0.263842854	0.263842854	0.263842854	0.263842854	0.263842854	0.263842854	0.263842854	0.263842854	0.263842854	0.263842854	0.263842854	0.263842854
19	0.267641903	0.267641903	0.267641903	0.267641903	0.267641903	0.267641903	0.267641903	0.267641903	0.267641903	0.267641903	0.267641903	0.267641903	0.267641903	0.267641903	0.267641903	0.267641903	0.267641903	0.267641903	0.267641903	0.267641903	0.267641903	0.267641903	0.267641903	0.267641903	0.267641903	0.267641903	0.267641903	0.267641903	0.267641903	0.267641903	0.267641903	0.267641903	0.267641903	0.267641903	0.267641903	0.267641903	0.267641903	0.267641903	0.267641903	0.267641903	0.267641903	0.267641903	0.267641903	0.267641903	0.267641903	0.267641903	0.267641903	0.267641903	0.267641903
20	0.271427133	0.271427133	0.271427133	0.271427133	0.271427133	0.271427133	0.271427133	0.271427133	0.271427133	0.271427133	0.271427133	0.271427133	0.271427133	0.271427133	0.271427133	0.271427133	0.271427133	0.271427133	0.271427133	0.271427133	0.271427133	0.271427133	0.271427133	0.271427133	0.271427133	0.271427133	0.271427133	0.271427133	0.271427133	0.271427133	0.271427133	0.271427133	0.271427133	0.271427133	0.271427133	0.271427133	0.271427133	0.271427133	0.271427133	0.271427133	0.271427133	0.271427133	0.271427133	0.271427133	0.271427133	0.271427133	0.271427133	0.271427133	0.271427133
21	0.27519095	0.27519095	0.27519095	0.27519095	0.27519095	0.27519095	0.27519095	0.27519095	0.27519095	0.27519095	0.27519095	0.27519095	0.27519095	0.27519095	0.27519095	0.27519095	0.27519095	0.27519095	0.27519095	0.27519095	0.27519095	0.27519095	0.27519095	0.27519095	0.27519095	0.27519095	0.27519095	0.27519095	0.27519095	0.27519095	0.27519095	0.27519095	0.27519095	0.27519095	0.27519095	0.27519095	0.27519095	0.27519095	0.27519095	0.27519095	0.27519095	0.27519095	0.27519095	0.27519095	0.27519095	0.27519095	0.27519095	0.27519095	0.27519095
22	0.278924828	0.278924828	0.278924828	0.278924828	0.278924828	0.278924828	0.278924828	0.278924828	0.278924828	0.278924828	0.278924828	0.278924828	0.278924828	0.278924828	0.278924828	0.278924828	0.278924828	0.278924828	0.278924828	0.278924828	0.278924828	0.278924828	0.278924828	0.278924828	0.278924828	0.278924828	0.278924828	0.278924828	0.278924828	0.278924828	0.278924828	0.278924828	0.278924828	0.278924828	0.278924828	0.278924828	0.278924828	0.278924828	0.278924828	0.278924828	0.278924828	0.278924828	0.278924828	0.278924828	0.278924828	0.278924828	0.278924828	0.278924828	0.278924828
23	0.282619217	0.282619217	0.282619217	0.282619217	0.282619217	0.282619217	0.282619217	0.282619217	0.282619217	0.282619217	0.282619217	0.282619217	0.282619217	0.282619217	0.282619217	0.282619217	0.282619217	0.282619217	0.282619217	0.282619217	0.282619217	0.282619217	0.282619217	0.282619217	0.282619217	0.282619217	0.282619217	0.282619217	0.282619217	0.282619217	0.282619217	0.282619217	0.282619217	0.282619217	0.282619217	0.282619217	0.282619217	0.282619217	0.282619217	0.282619217	0.282619217	0.282619217	0.282619217	0.282619217	0.282619217	0.282619217	0.282619217	0.282619217	0.282619217
24	0.286265137	0.286265137	0.286265137	0.286265137	0.286265137	0.286265137	0.286265137	0.286265137	0.286265137	0.286265137	0.286265137	0.286265137	0.286265137	0.286265137	0.286265137	0.286265137	0.286265137	0.286265137	0.286265137	0.286265137	0.286265137	0.286265137	0.286265137	0.286265137	0.286265137	0.286265137	0.286265137	0.286265137	0.286265137	0.286265137	0.286265137	0.286265137	0.286265137	0.286265137	0.286265137	0.286265137	0.286265137	0.286265137	0.286265137	0.286265137	0.286265137	0.286265137	0.286265137	0.286265137	0.286265137	0.286265137	0.286265137	0.286265137	0.286265137
25	0.28985266	0.28985266	0.28985266	0.28985266	0.28985266	0.28985266	0.28985266	0.28985266	0.28985266	0.28985266	0.28985266	0.28985266	0.28985266	0.28985266	0.28985266	0.28985266	0.28985266	0.28985266	0.28985266	0.28985266	0.28985266	0.28985266	0.28985266	0.28985266	0.28985266	0.28985266	0.28985266	0.28985266	0.28985266	0.28985266	0.28985266	0.28985266	0.28985266	0.28985266	0.28985266	0.28985266	0.28985266	0.28985266	0.28985266	0.28985266	0.28985266	0.28985266	0.28985266	0.28985266	0.28985266	0.28985266	0.28985266	0.28985266	0.28985266
26	0.293370771	0.293370771	0.293370771	0.293370771	0.293370771	0.293370771	0.293370771	0.293370771	0.293370771	0.293370771	0.293370771	0.293370771	0.293370771	0.293370771	0.293370771	0.293370771	0.293370771	0.293370771	0.293370771	0.293370771	0.293370771	0.293370771	0.293370771	0.293370771	0.293370771	0.293370771	0.293370771	0.293370771	0.293370771	0.293370771	0.293370771	0.293370771	0.293370771	0.293370771	0.293370771	0.293370771	0.293370771	0.293370771	0.293370771	0.293370771	0.293370771	0.293370771	0.293370771	0.293370771	0.293370771	0.293370771	0.293370771	0.293370771	0.293370771
27	0.296810258	0.296810258	0.296810258	0.296810258	0.296810258	0.296810258	0.296810258	0.296810258	0.296810258	0.296810258	0.296810258	0.296810258	0.296810258	0.296810258	0.296810258	0.296810258	0.296810258	0.296810258	0.296810258	0.296810258	0.296810258	0.296810258	0.296810258	0.296810258	0.296810258	0.296810258	0.296810258	0.296810258	0.296810258	0.296810258	0.296810258	0.296810258	0.296810258	0.296810258	0.296810258	0.296810258	0.296810258	0.296810258	0.296810258	0.296810258	0.296810258	0.296810258	0.296810258	0.296810258	0.296810258	0.296810258	0.296810258	0.296810258	0.296810258
28	0.300160952	0.300160952	0.300160952	0.300160952	0.300160952	0.300160952	0.300160952	0.300160952	0.300160952	0.300160952	0.300160952	0.300160952	0.300160952	0.300160952	0.300160952	0.300160952	0.300160952	0.300160952	0.300160952	0.300160952	0.300160952	0.300160952	0.300160952	0.300160952	0.300160952	0.300160952	0.300160952	0.300160952	0.300160952	0.300160952	0.300160952	0.300160952	0.300160952	0.300160952	0.300160952	0.300160952	0.300160952	0.300160952	0.300160952	0.300160952	0.300160952	0.300160952	0.300160952	0.300160952	0.300160952	0.300160952	0.300160952	0.300160952	0.300160952
29	0.303411527	0.303411527	0.303411527	0.303411527	0.303411527	0.303411527	0.303411527	0.303411527	0.303411527	0.303411527	0.303411527	0.303411527	0.303411527	0.303411527	0.303411527	0.303411527	0.303411527	0.303411527	0.303411527	0.303411527	0.303411527	0.303411527	0.303411527	0.303411527	0.303411527	0.303411527	0.303411527	0.303411527	0.303411527	0.303411527	0.303411527	0.303411527	0.303411527	0.303411527	0.303411527	0.303411527	0.303411527	0.303411527	0.303411527	0.303411527	0.303411527	0.303411527	0.303411527	0.303411527	0.303411527	0.303411527	0.303411527	0.303411527	0.303411527
30	0.306552786	0.306552786	0.306552786	0.306552786	0.306552786	0.306552786	0.306552786	0.306552786	0.306552786	0.306552786	0.306552786	0.306552786	0.306552786	0.306552786	0.306552786	0.306552786	0.306552786	0.306552786	0.306552786	0.306552786	0.306552786	0.306552786	0.306552786	0.306552786	0.306552786	0.306552786	0.306552786	0.306552786	0.306552786	0.306552786	0.306552786	0.306552786	0.306552786	0.306552786	0.306552786	0.306552786	0.306552786	0.306552786	0.306552786	0.306552786	0.306552786	0.306552786	0.306552786	0.306552786	0.306552786	0.306552786	0.306552786	0.306552786	0.306552786
31	0.309574869	0.309574869	0.309574869	0.309574869	0.309574869	0.309574869	0.309574869	0.309574869	0.309574869	0.309574869	0.309574869	0.309574869	0.309574869	0.309574869	0.309574869	0.309574869	0.309574869	0.309574869	0.309574869	0.309574869	0.309574869	0.309574869	0.309574869	0.309574869	0.309574869	0.309574869	0.309574869	0.309574869	0.309574869	0.309574869	0.309574869	0.309574869	0.309574869	0.309574869	0.309574869	0.309574869	0.309574869	0.309574869	0.309574869	0.309574869	0.309574869	0.309574869	0.309574869	0.309574869	0.309574869	0.309574869	0.309574869	0.309574869	0.309574869
32	0.312467119	0.312467119	0.312467119	0.312467119	0.312467119	0.312467119	0.312467119	0.312467119	0.312467119	0.312467119	0.312467119	0.312467119	0.312467119	0.312467119	0.312467119	0.312467119	0.312467119	0.312467119	0.312467119	0.312467119	0.312467119	0.312467119	0.312467119	0.312467119	0.312467119	0.312467119	0.312467119	0.312467119	0.312467119	0.312467119	0.312467119	0.312467119	0.312467119	0.312467119	0.312467119	0.312467119	0.312467119	0.312467119	0.312467119	0.312467119	0.312467119	0.312467119	0.312467119	0.312467119	0.312467119	0.312467119	0.312467119	0.312467119	0.312467119
33	0.315221146	0.315221146	0.315221146	0.315221146	0.315221146	0.315221146	0.315221146	0.315221146	0.315221146	0.315221146	0.315221146	0.315221146	0.315221146	0.315221146	0.315221146	0.315221146	0.315221146	0.315221146	0.315221146	0.315221146	0.315221146	0.315221146	0.315221146	0.315221146	0.315221146	0.315221146	0.315221146	0.315221146	0.315221146	0.315221146	0.315221146	0.315221146	0.315221146	0.315221146	0.315221146	0.315221146	0.315221146	0.315221146	0.315221146	0.315221146	0.315221146	0.315221146	0.315221146	0.315221146	0.315221146	0.315221146	0.315221146	0.315221146	0.315221146
34	0.317828161	0.317828161	0.317828161	0.317828161	0.317828161	0.317828161	0.317828161	0.317828161	0.317828161	0.317828161	0.317828161	0.317828161	0.317828161	0.317828161	0.317828161	0.317828161	0.317828161	0.317828161	0.317828161	0.317828161	0.317828161	0.317828161	0.317828161	0.317828161	0.317828161	0.317828161	0.317828161	0.317828161	0.317828161	0.317828161	0.317828161	0.317828161	0.317828161	0.317828161	0.317828161	0.317828161	0.317828161	0.317828161	0.317828161	0.317828161	0.317828161	0.317828161	0.317828161	0.317828161	0.317828161	0.317828161	0.317828161	0.317828161	0.317828161
35	0.320278884	0.320278884	0.320278884	0.320278884	0.320278884	0.320278884	0.320278884	0.320278884	0.320278884	0.320278884	0.320278884	0.320278884	0.320278884	0.320278884	0.320278884	0.320278884	0.320278884	0.320278884	0.320278884	0.320278884	0.320278884	0.320278884	0.320278884	0.320278884	0.320278884	0.320278884	0.320278884	0.320278884	0.320278884	0.320278884	0.320278884	0.320278884	0.320278884	0.320278884	0.320278884	0.320278884	0.320278884	0.320278884	0.320278884	0.320278884	0.320278884	0.320278884	0.320278884	0.320278884	0.320278884	0.320278884	0.320278884	0.320278884	0.320278884
36	0.322567411	0.322567411	0.322567411	0.322567411	0.322567411	0.322567411	0.322567411	0.322567411	0.322567411	0.322567411	0.322567411	0.322567411	0.322567411	0.322567411	0.322567411	0.322567411	0.322567411	0.322567411	0.322567411	0.322567411	0.322567411	0.322567411	0.322567411	0.322567411	0.322567411	0.322567411	0.322567411	0.322567411	0.322567411	0.322567411	0.322567411	0.322567411	0.322567411	0.322567411	0.322567411	0.322567411	0.322567411	0.322567411	0.322567411	0.322567411	0.322567411	0.322567411	0.322567411	0.322567411	0.322567411	0.322567411	0.322567411	0.322567411	0.322567411
37	0.324687483	0.324687483	0.324687483	0.324687483	0.324687483	0.324687483	0.324687483	0.324687483	0.324687483	0.324687483	0.324687483	0.324687483	0.324687483	0.324687483	0.324687483	0.324687483	0.324687483	0.324687483	0.324687483	0.324687483	0.324687483	0.324687483	0.324687483	0.324687483	0.324687483	0.324687483	0.324687483	0.324687483	0.324687483	0.324687483	0.324687483	0.324687483	0.324687483	0.324687483	0.324687483	0.324687483	0.324687483	0.324687483	0.324687483	0.324687483	0.324687483	0.324687483	0.324687483	0.324687483	0.324687483	0.324687483	0.324687483	0.324687483	0.324687483
38	0.326632434	0.326632434	0.326632434	0.326632434	0.326632434	0.326632434	0.326632434	0.326632434	0.326632434	0.326632434	0.326632434	0.326632434	0.326632434	0.326632434	0.326632434	0.326632434	0.326632434	0.326632434	0.326632434	0.326632434	0.326632434	0.326632434	0.326632434	0.326632434	0.326632434	0.326632434	0.326632434	0.326632434	0.326632434	0.326632434	0.326632434	0.326632434	0.326632434	0.326632434	0.326632434	0.326632434	0.326632434	0.326632434	0.326632434	0.326632434	0.326632434	0.326632434	0.326632434	0.326632434	0.326632434	0.326632434	0.326632434	0.326632434	0.326632434
39	0.328403207	0.328403207	0.328403207	0.328403207	0.328403207	0.328403207	0.328403207	0.328403207	0.328403207	0.328403207	0.328403207	0.328403207	0.328403207	0.328403207	0.328403207	0.328403207	0.328403207	0.328403207	0.328403207	0.328403207	0.328403207	0.328403207	0.328403207	0.328403207	0.328403207	0.328403207	0.328403207	0.328403207	0.328403207	0.328403207	0.328403207	0.328403207	0.328403207	0.328403207	0.328403207	0.328403207	0.328403207	0.328403207	0.328403207	0.328403207	0.328403207	0.328403207	0.328403207	0.328403207	0.328403207	0.328403207	0.328403207	0.328403207	0.328403207
40	0.329996699	0.329996699	0.329996699	0.329996699	0.329996699	0.329996699	0.329996699	0.329996699	0.329996699	0.329996699	0.329996699	0.329996699	0.329996699	0.329996699	0.329996699	0.329996699	0.329996699	0.329996699	0.329996699	0.329996699	0.329996699	0.329996699	0.329996699	0.329996699	0.329996699	0.329996699	0.329996699	0.329996699	0.329996699	0.329996699	0.329996699	0.329996699	0.329996699	0.329996699	0.329996699	0.329996699	0.329996699	0.329996699	0.329996699	0.329996699	0.329996699	0.329996699	0.329996699	0.329996699	0.329996699	0.329996699	0.329996699	0.329996699	0.329996699
41	0.331409199	0.331409199	0.331409199	0.331409199	0.331409199	0.331409199	0.331409199	0.331409199	0.331409199	0.331409199	0.331409199	0.331409199	0.331409199	0.331409199	0.331409199	0.331409199	0.331409199	0.331409199	0.331409199	0.331409199	0.331409199	0.331409199	0.331409199	0.331409199	0.331409199	0.331409199	0.331409199	0.331409199	0.331409199	0.331409199	0.331409199	0.331409199	0.331409199	0.331409199	0.331409199	0.331409199	0.331409199	0.331409199	0.331409199	0.331409199	0.331409199	0.331409199	0.331409199	0.331409199	0.331409199	0.331409199	0.331409199	0.331409199	0.331409199
42	0.332639416	0.332639416	0.332639416	0.332639416	0.332639416	0.332639416	0.332639416	0.332639416	0.332639416	0.332639416	0.332639416	0.332639416	0.332639416	0.332639416	0.332639416	0.332639416	0.332639416	0.332639416	0.332639416	0.332639416	0.332639416	0.332639416	0.332639416	0.332639416	0.332639416	0.332639416	0.332639416	0.332639416	0.332639416	0.332639416	0.332639416	0.332639416	0.332639416	0.332639416	0.332639416	0.332639416	0.332639416	0.332639416	0.332639416	0.332639416	0.332639416	0.332639416	0.332639416	0.332639416	0.332639416	0.332639416	0.332639416	0.332639416	0.332639416
43	0.333687843	0.333687843	0.333687843	0.333687843	0.333687843	0.333687843	0.333687843	0.333687843	0.333687843	0.333687843	0.333687843	0.333687843	0.333687843	0.333687843	0.333687843	0.333687843	0.333687843	0.333687843	0.333687843	0.333687843	0.333687843	0.333687843	0.333687843	0.333687843	0.333687843	0.333687843	0.333687843	0.333687843	0.333687843	0.333687843	0.333687843	0.333687843	0.333687843	0.333687843	0.333687843	0.333687843	0.333687843	0.333687843	0.333687843	0.333687843	0.333687843	0.333687843	0.333687843	0.333687843	0.333687843	0.333687843	0.333687843	0.333687843	0.333687843
44	0.334565575	0.334565575	0.334565575	0.334565575	0.334565575	0.334565575	0.334565575	0.334565575	0.334565575	0.334565575	0.334565575	0.334565575	0.334565575	0.334565575	0.334565575	0.334565575	0.334565575	0.334565575	0.334565575	0.334565575	0.334565575	0.334565575	0.334565575	0.334565575	0.334565575	0.334565575	0.334565575	0.334565575	0.334565575	0.334565575	0.334565575	0.334565575	0.334565575	0.334565575	0.334565575	0.334565575	0.334565575	0.334565575	0.334565575	0.334565575	0.334565575	0.334565575	0.334565575	0.334565575	0.334565575	0.334565575	0.334565575	0.334565575	0.334565575
45	0.335271442	0.335271442	0.335271442	0.335271442	0.335271442	0.335271442	0.335271442	0.335271442	0.335271442	0.335271442	0.335271442	0.335271442	0.335271442	0.335271442	0.335271442	0.335271442	0.335271442	0.335271442	0.335271442	0.335271442	0.335271442	0.335271442	0.335271442	0.335271442	0.335271442	0.335271442	0.335271442	0.335271442	0.335271442	0.335271442	0.335271442	0.335271442	0.335271442	0.335271442	0.335271442	0.335271442	0.335271442	0.335271442	0.335271442	0.335271442	0.335271442	0.335271442	0.335271442	0.335271442	0.335271442	0.335271442	0.335271442	0.335271442	0.335271442
46	0.335810371	0.335810371	0.335810371	0.335810371	0.335810371	0.335810371	0.335810371	0.335810371	0.335810371	0.335810371	0.335810371	0.335810371	0.335810371	0.335810371	0.335810371	0.335810371	0.335810371	0.335810371	0.335810371	0.335810371	0.335810371	0.335810371	0.335810371	0.335810371	0.335810371	0.335810371	0.335810371	0.335810371	0.335810371	0.335810371	0.335810371	0.335810371	0.335810371	0.335810371	0.335810371	0.335810371	0.335810371	0.335810371	0.335810371	0.335810371	0.335810371	0.335810371	0.335810371	0.335810371	0.335810371	0.335810371	0.335810371	0.335810371	0.335810371
47	0.336188477	0.336188477	0.336188477	0.336188477	0.336188477	0.336188477	0.336188477	0.336188477	0.336188477	0.336188477	0.336188477	0.336188477	0.336188477	0.336188477	0.336188477	0.336188477	0.336188477	0.336188477	0.336188477	0.336188477	0.336188477	0.336188477	0.336188477	0.336188477	0.336188477	0.336188477	0.336188477	0.336188477	0.336188477	0.336188477	0.336188477	0.336188477	0.336188477	0.336188477	0.336188477	0.336188477	0.336188477	0.336188477	0.336188477	0.336188477	0.336188477	0.336188477	0.336188477	0.336188477	0.336188477	0.336188477	0.336188477	0.336188477	0.336188477
48	0.336414637	0.336414637	0.336414637	0.336414637	0.336414637	0.336414637	0.336414637	0.336414637	0.336414637	0.336414637	0.336414637	0.336414637	0.336414637	0.336414637	0.336414637	0.336414637	0.336414637	0.336414637	0.336414637	0.336414637	0.336414637	0.336414637	0.336414637	0.336414637	0.336414637	0.336414637	0.336414637	0.336414637	0.336414637	0.336414637	0.336414637	0.336414637	0.336414637	0.336414637	0.336414637	0.336414637	0.336414637	0.336414637	0.336414637	0.336414637	0.336414637	0.336414637	0.336414637	0.336414637	0.336414637	0.336414637	0.336414637	0.336414637	0.336414637
49	0.336499456	0.336499456	0.336499456	0.336499456	0.336499456	0.336499456	0.336499456	0.336499456	0.336499456	0.336499456	0.336499456	0.336499456	0.336499456	0.336499456	0.336499456	0.336499456	0.336499456	0.336499456	0.336499456	0.336499456	0.336499456	0.336499456	0.336499456	0.336499456	0.336499456	0.336499456	0.336499456	0.336499456	0.336499456	0.336499456	0.336499456	0.336499456	0.336499456	0.336499456	0.336499456	0.336499456	0.336499456	0.336499456	0.336499456	0.336499456	0.336499456	0.336499456	0.336499456	0.336499456	0.336499456	0.336499456	0.336499456	0.336499456	0.336499456
50	0.336452326	0.336452326	0.336452326	0.336452326	0.336452326	0.336452326	0.336452326	0.336452326	0.336452326	0.336452326	0.336452326	0.336452326	0.336452326	0.336452326	0.336452326	0.336452326	0.336452326	0.336452326	0.336452326	0.336452326	0.336452326	0.336452326	0.336452326	0.336452326	0.336452326	0.336452326	0.336452326	0.336452326	0.336452326	0.336452326	0.336452326	0.336452326	0.336452326	0.336452326	0.336452326	0.336452326	0.336452326	0.336452326	0.336452326	0.336452326	0.336452326	0.336452326	0.336452326	0.336452326	0.336452326	0.336452326	0.336452326	0.336452326	0.336452326
51	0.336285081	0.336285081	0.336285081	0.336285081	0.336285081	0.336285081	0.336285081	0.336285081	0.336285081	0.336285081	0.336285081	0.336285081	0.336285081	0.336285081	0.336285081	0.336285081	0.336285081	0.336285081	0.336285081	0.336285081	0.336285081	0.336285081	0.336285081	0.336285081	0.336285081	0.336285081	0.336285081	0.336285081	0.336285081	0.336285081	0.336285081	0.336285081	0.336285081	0.336285081	0.336285081	0.336285081	0.336285081	0.336285081	0.336285081	0.336285081	0.336285081	0.336285081	0.336285081	0.336285081	0.336285081	0.336285081	0.336285081	0.336285081	0.336285081
52	0.336010849	0.336010849	0.336010849	0.336010849	0.336010849	0.336010849	0.336010849	0.336010849	0.336010849	0.336010849	0.336010849	0.336010849	0.336010849	0.336010849	0.336010849	0.336010849	0.336010849	0.336010849	0.336010849	0.336010849	0.336010849	0.336010849	0.336010849	0.336010849	0.336010849	0.336010849	0.336010849	0.336010849	0.336010849	0.336010849	0.336010849	0.336010849	0.336010849	0.336010849	0.336010849	0.336010849	0.336010849	0.336010849	0.336010849	0.336010849	0.336010849	0.336010849	0.336010849	0.336010849	0.336010849	0.336010849	0.336010849	0.336010849	0.336010849
53	0.335633649	0.335633649	0.335633649	0.335633649	0.335633649	0.335633649	0.335633649	0.335633649	0.335633649	0.335633649	0.335633649	0.335633649	0.335633649	0.335633649	0.335633649	0.335633649	0.335633649	0.335633649	0.335633649	0.335633649	0.335633649	0.335633649	0.335633649	0.335633649	0.335633649	0.335633649	0.335633649	0.335633649	0.335633649	0.335633649	0.335633649	0.335633649	0.335633649	0.335633649	0.335633649	0.335633649	0.335633649	0.335633649	0.335633649	0.335633649	0.335633649	0.335633649	0.335633649	0.335633649	0.335633649	0.335633649	0.335633649	0.335633649	0.335633649
54	0.335169037	0.335169037	0.335169037	0.335169037	0.335169037	0.335169037	0.335169037	0.335169037	0.335169037	0.335169037	0.335169037	0.335169037	0.335169037	0.335169037	0.335169037	0.335169037	0.335169037	0.335169037	0.335169037	0.335169037	0.335169037	0.335169037	0.335169037	0.335169037	0.335169037	0.335169037	0.335169037	0.335169037	0.335169037	0.335169037	0.335169037	0.335169037	0.335169037	0.335169037	0.335169037	0.335169037	0.335169037	0.335169037	0.335169037	0.335169037	0.335169037	0.335169037	0.335169037	0.335169037	0.335169037	0.335169037	0.335169037	0.335169037	0.335169037
55	0.334632287	0.334632287	0.334632287	0.334632287	0.334632287	0.334632287	0.334632287	0.334632287	0.334632287	0.334632287	0.334632287	0.334632287	0.334632287	0.334632287	0.334632287	0.334632287	0.334632287	0.334632287	0.334632287	0.334632287	0.334632287	0.334632287	0.334632287	0.334632287	0.334632287	0.334632287	0.334632287	0.334632287	0.334632287	0.334632287	0.334632287	0.334632287	0.334632287	0.334632287	0.334632287	0.334632287	0.334632287	0.334632287	0.334632287	0.334632287	0.334632287	0.334632287	0.334632287	0.334632287	0.334632287	0.334632287	0.334632287	0.334632287	0.334632287
56	0.334038369	0.334038369	0.334038369	0.334038369	0.334038369	0.334038369	0.334038369	0.334038369	0.334038369	0.334038369	0.334038369	0.334038369	0.334038369	0.334038369	0.334038369	0.334038369	0.334038369	0.334038369	0.334038369	0.334038369	0.334038369	0.334038369	0.334038369	0.334038369	0.334038369	0.334038369	0.334038369	0.334038369	0.334038369	0.334038369	0.334038369	0.334038369	0.334038369	0.334038369	0.334038369	0.334038369	0.334038369	0.334038369	0.334038369	0.334038369	0.334038369	0.334038369	0.334038369	0.334038369	0.334038369	0.334038369	0.334038369	0.334038369	0.334038369
57	0.333398874	0.333398874	0.333398874	0.333398874	0.333398874	0.333398874	0.333398874	0.333398874	0.333398874	0.333398874	0.333398874	0.333398874	0.333398874	0.333398874	0.333398874	0.333398874	0.333398874	0.333398874	0.333398874	0.333398874	0.333398874	0.333398874	0.333398874	0.333398874	0.333398874	0.333398874	0.333398874	0.333398874	0.333398874	0.333398874	0.333398874	0.333398874	0.333398874	0.333398874	0.333398874	0.333398874	0.333398874	0.333398874	0.333398874	0.333398874	0.333398874	0.333398874	0.333398874	0.333398874	0.333398874	0.333398874	0.333398874	0.333398874	0.333398874
58	0.33270989	0.33270989	0.33270989	0.33270989	0.33270989	0.33270989	0.33270989	0.33270989	0.33270989	0.33270989	0.33270989	0.33270989	0.33270989	0.33270989	0.33270989	0.33270989	0.33270989	0.33270989	0.33270989	0.33270989	0.33270989	0.33270989	0.33270989	0.33270989	0.33270989	0.33270989	0.33270989	0.33270989	0.33270989	0.33270989	0.33270989	0.33270989	0.33270989	0.33270989	0.33270989	0.33270989	0.33270989	0.33270989	0.33270989	0.33270989	0.33270989	0.33270989	0.33270989	0.33270989	0.33270989	0.33270989	0.33270989	0.33270989	0.33270989
59	0.331993607	0.331993607	0.331993607	0.331993607	0.331993607	0.331993607	0.331993607	0.331993607	0.331993607	0.331993607	0.331993607	0.331993607	0.331993607	0.331993607	0.331993607	0.331993607	0.331993607	0.331993607	0.331993607	0.331993607	0.331993607	0.331993607	0.331993607	0.331993607	0.331993607	0.331993607	0.331993607	0.331993607	0.331993607	0.331993607	0.331993607	0.331993607	0.331993607	0.331993607	0.331993607	0.331993607	0.331993607	0.331993607	0.331993607	0.331993607	0.331993607	0.331993607	0.331993607	0.331993607	0.331993607	0.331993607	0.331993607	0.331993607	0.331993607
60	0.331262559	0.331262559	0.331262559	0.331262559	0.331262559	0.331262559	0.331262559	0.331262559	0.331262559	0.331262559	0.331262559	0.331262559	0.331262559	0.331262559	0.331262559	0.331262559	0.331262559	0.331262559	0.331262559	0.331262559	0.331262559	0.331262559	0.331262559	0.331262559	0.331262559	0.331262559	0.331262559	0.331262559	0.331262559	0.331262559	0.331262559	0.331262559	0.331262559	0.331262559	0.331262559	0.331262559	0.331262559	0.331262559	0.331262559	0.331262559	0.331262559	0.331262559	0.331262559	0.331262559	0.331262559	0.331262559	0.331262559	0.331262559	0.331262559
61	0.330529502	0.330529502	0.330529502	0.330529502	0.330529502	0.330529502	0.330529502	0.330529502	0.330529502	0.330529502	0.330529502	0.330529502	0.330529502	0.330529502	0.330529502	0.330529502	0.330529502	0.330529502	0.330529502	0.330529502	0.330529502	0.330529502	0.330529502	0.330529502	0.330529502	0.330529502	0.330529502	0.330529502	0.330529502	0.330529502	0.330529502	0.330529502	0.330529502	0.330529502	0.330529502	0.330529502	0.330529502	0.330529502	0.330529502	0.330529502	0.330529502	0.330529502	0.330529502	0.330529502	0.330529502	0.330529502	0.330529502	0.330529502	0.330529502
62	0.329794633	0.329794633	0.329794633	0.329794633	0.329794633	0.329794633	0.329794633	0.329794633	0.329794633	0.329794633	0.329794633	0.329794633	0.329794633	0.329794633	0.329794633	0.329794633	0.329794633	0.329794633	0.329794633	0.329794633	0.329794633	0.329794633	0.329794633	0.329794633	0.329794633	0.329794633	0.329794633	0.329794633	0.329794633	0.329794633	0.329794633	0.329794633	0.329794633	0.329794633	0.329794633	0.329794633	0.329794633	0.329794633	0.329794633	0.329794633	0.329794633	0.329794633	0.329794633	0.329794633	0.329794633	0.329794633	0.329794633	0.329794633	0.329794633
63	0.329061438	0.329061438	0.329061438	0.329061438	0.329061438	0.329061438	0.329061438	0.329061438	0.329061438	0.329061438	0.329061438	0.329061438	0.329061438	0.329061438	0.329061438	0.329061438	0.329061438	0.329061438	0.329061438	0.329061438	0.329061438	0.329061438	0.329061438	0.329061438	0.329061438	0.329061438	0.329061438	0.329061438	0.329061438	0.329061438	0.329061438	0.329061438	0.329061438	0.329061438	0.329061438	0.329061438	0.329061438	0.329061438	0.329061438	0.329061438	0.329061438	0.329061438	0.329061438	0.329061438	0.329061438	0.329061438	0.329061438	0.329061438	0.329061438
64	0.32834366	0.32834366	0.32834366	0.32834366	0.32834366	0.32834366	0.32834366	0.32834366	0.32834366	0.32834366	0.32834366	0.32834366	0.32834366	0.32834366	0.32834366	0.32834366	0.32834366	0.32834366	0.32834366	0.32834366	0.32834366	0.32834366	0.32834366	0.32834366	0.32834366	0.32834366	0.32834366	0.32834366	0.32834366	0.32834366	0.32834366	0.32834366	0.32834366	0.32834366	0.32834366	0.32834366	0.32834366	0.32834366	0.32834366	0.32834366	0.32834366	0.32834366	0.32834366	0.32834366	0.32834366	0.32834366	0.32834366	0.32834366	0.32834366
65	0.327648697	0.327648697	0.327648697	0.327648697	0.327648697	0.327648697	0.327648697	0.327648697	0.327648697	0.327648697	0.327648697	0.327648697	0.327648697	0.327648697	0.327648697	0.327648697	0.327648697	0.327648697	0.327648697	0.327648697	0.327648697	0.327648697	0.327648697	0.327648697	0.327648697	0.327648697	0.327648697	0.327648697	0.327648697	0.327648697	0.327648697	0.327648697	0.327648697	0.327648697	0.327648697	0.327648697	0.327648697	0.327648697	0.327648697	0.327648697	0.327648697	0.327648697	0.327648697	0.327648697	0.327648697	0.327648697	0.327648697	0.327648697	0.327648697
66	0.326983474	0.326983474	0.326983474	0.326983474	0.326983474	0.326983474	0.326983474	0.326983474	0.326983474	0.326983474	0.326983474	0.326983474	0.326983474	0.326983474	0.326983474	0.326983474	0.326983474	0.326983474	0.326983474	0.326983474	0.326983474	0.326983474	0.326983474	0.326983474	0.326983474	0.326983474	0.326983474	0.326983474	0.326983474	0.326983474	0.326983474	0.326983474	0.326983474	0.326983474	0.326983474	0.326983474	0.326983474	0.326983474	0.326983474	0.326983474	0.326983474	0.326983474	0.326983474	0.326983474	0.326983474	0.326983474	0.326983474	0.326983474	0.326983474
67	0.32634335	0.32634335	0.32634335	0.32634335	0.32634335	0.32634335	0.32634335	0.32634335	0.32634335	0.32634335	0.32634335	0.32634335	0.32634335	0.32634335	0.32634335	0.32634335	0.32634335	0.32634335	0.32634335	0.32634335	0.32634335	0.32634335	0.32634335	0.32634335	0.32634335	0.32634335	0.32634335	0.32634335	0.32634335	0.32634335	0.32634335	0.32634335	0.32634335	0.32634335	0.32634335	0.32634335	0.32634335	0.32634335	0.32634335	0.32634335	0.32634335	0.32634335	0.32634335	0.32634335	0.32634335	0.32634335	0.32634335	0.32634335	0.32634335
68	0.325737962	0.325737962	0.325737962	0.325737962	0.325737962	0.325737962	0.325737962	0.325737962	0.325737962	0.325737962	0.325737962	0.325737962	0.325737962	0.325737962	0.325737962	0.325737962	0.325737962	0.325737962	0.325737962	0.325737962	0.325737962	0.325737962	0.325737962	0.325737962	0.325737962	0.325737962	0.325737962	0.325737962	0.325737962	0.325737962	0.325737962	0.325737962	0.325737962	0.325737962	0.325737962	0.325737962	0.325737962	0.325737962	0.325737962	0.325737962	0.325737962	0.325737962	0.325737962	0.325737962	0.325737962	0.325737962	0.325737962	0.325737962	0.325737962
69	0.325171248	0.325171248	0.325171248	0.325171248	0.325171248	0.325171248	0.325171248	0.325171248	0.325171248	0.325171248	0.325171248	0.325171248	0.325171248	0.325171248	0.325171248	0.325171248	0.325171248	0.325171248	0.325171248	0.325171248	0.325171248	0.325171248	0.325171248	0.325171248	0.325171248	0.325171248	0.325171248	0.325171248	0.325171248	0.325171248	0.325171248	0.325171248	0.325171248	0.325171248	0.325171248	0.325171248	0.325171248	0.325171248	0.325171248	0.325171248	0.325171248	0.325171248	0.325171248	0.325171248	0.325171248	0.325171248	0.325171248	0.325171248	0.325171248
70	0.324646205	0.324646205	0.324646205	0.324646205	0.324646205	0.324646205	0.324646205	0.324646205	0.324646205	0.324646205	0.324646205	0.324646205	0.324646205	0.324646205	0.324646205	0.324646205	0.324646205	0.324646205	0.324646205	0.324646205	0.324646205	0.324646205	0.324646205	0.324646205	0.324646205	0.324646205	0.324646205	0.324646205	0.324646205	0.324646205	0.324646205	0.324646205	0.324646205	0.324646205	0.324646205	0.324646205	0.324646205	0.324646205	0.324646205	0.324646205	0.324646205	0.324646205	0.324646205	0.324646205	0.324646205	0.324646205	0.324646205	0.324646205	0.324646205
71	0.324165176	0.324165176	0.324165176	0.324165176	0.324165176	0.324165176	0.324165176	0.324165176	0.324165176	0.324165176	0.324165176	0.324165176	0.324165176	0.324165176	0.324165176	0.324165176	0.324165176	0.324165176	0.324165176	0.324165176	0.324165176	0.324165176	0.324165176	0.324165176	0.324165176	0.324165176	0.324165176	0.324165176	0.324165176	0.324165176	0.324165176	0.324165176	0.324165176	0.324165176	0.324165176	0.324165176	0.324165176	0.324165176	0.324165176	0.324165176	0.324165176	0.324165176	0.324165176	0.324165176	0.324165176	0.324165176	0.324165176	0.324165176	0.324165176
72	0.323729229	0.323729229	0.323729229	0.323729229	0.323729229	0.323729229	0.323729229	0.323729229	0.323729229	0.323729229	0.323729229	0.323729229	0.323729229	0.323729229	0.323729229	0.323729229	0.323729229	0.323729229	0.323729229	0.323729229	0.323729229	0.323729229	0.323729229	0.323729229	0.323729229	0.323729229	0.323729229	0.323729229	0.323729229	0.323729229	0.323729229	0.323729229	0.323729229	0.323729229	0.323729229	0.323729229	0.323729229	0.323729229	0.323729229	0.323729229	0.323729229	0.323729229	0.323729229	0.323729229	0.323729229	0.323729229	0.323729229	0.323729229	0.323729229
73	0.323337539	0.323337539	0.323337539	0.323337539	0.323337539	0.323337539	0.323337539	0.323337539	0.323337539	0.323337539	0.323337539	0.323337539	0.323337539	0.323337539	0.323337539	0.323337539	0.323337539	0.323337539	0.323337539	0.323337539	0.323337539	0.323337539	0.323337539	0.323337539	0.323337539	0.323337539	0.323337539	0.323337539	0.323337539	0.323337539	0.323337539	0.323337539	0.323337539	0.323337539	0.323337539	0.323337539	0.323337539	0.323337539	0.323337539	0.323337539	0.323337539	0.323337539	0.323337539	0.323337539	0.323337539	0.323337539	0.323337539	0.323337539	0.323337539
74	0.32299118	0.32299118	0.32299118	0.32299118	0.32299118	0.32299118	0.32299118	0.32299118	0.32299118	0.32299118	0.32299118	0.32299118	0.32299118	0.32299118	0.32299118	0.32299118	0.32299118	0.32299118	0.32299118	0.32299118	0.32299118	0.32299118	0.32299118	0.32299118	0.32299118	0.32299118	0.32299118	0.32299118	0.32299118	0.32299118	0.32299118	0.32299118	0.32299118	0.32299118	0.32299118	0.32299118	0.32299118	0.32299118	0.32299118	0.32299118	0.32299118	0.32299118	0.32299118	0.32299118	0.32299118	0.32299118	0.32299118	0.32299118	0.32299118
75	0.322689428	0.322689428	0.322689428	0.322689428	0.322689428	0.322689428	0.322689428	0.322689428	0.322689428	0.322689428	0.322689428	0.322689428	0.322689428	0.322689428	0.322689428	0.322689428	0.322689428	0.322689428	0.322689428	0.322689428	0.322689428	0.322689428	0.322689428	0.322689428	0.322689428	0.322689428	0.322689428	0.322689428	0.322689428	0.322689428	0.322689428	0.322689428	0.322689428	0.322689428	0.322689428	0.322689428	0.322689428	0.322689428	0.322689428	0.322689428	0.322689428	0.322689428	0.322689428	0.322689428	0.322689428	0.322689428	0.322689428	0.322689428	0.322689428
76	0.322430862	0.322430862	0.322430862	0.322430862	0.322430862	0.322430862	0.322430862	0.322430862	0.322430862	0.322430862	0.322430862	0.322430862	0.322430862	0.322430862	0.322430862	0.322430862	0.322430862	0.322430862	0.322430862	0.322430862	0.322430862	0.322430862	0.322430862	0.322430862	0.322430862	0.322430862	0.322430862	0.322430862	0.322430862	0.322430862	0.322430862	0.322430862	0.322430862	0.322430862	0.322430862	0.322430862	0.322430862	0.322430862	0.322430862	0.322430862	0.322430862	0.322430862	0.322430862	0.322430862	0.322430862	0.322430862	0.322430862	0.322430862	0.322430862
77	0.322213362	0.322213362	0.322213362	0.322213362	0.322213362	0.322213362	0.322213362	0.322213362	0.322213362	0.322213362	0.322213362	0.322213362	0.322213362	0.322213362	0.322213362	0.322213362	0.322213362	0.322213362	0.322213362	0.322213362	0.322213362	0.322213362	0.322213362	0.322213362	0.322213362	0.322213362	0.322213362	0.322213362	0.322213362	0.322213362	0.322213362	0.322213362	0.322213362	0.322213362	0.322213362	0.322213362	0.322213362	0.322213362	0.322213362	0.322213362	0.322213362	0.322213362	0.322213362	0.322213362	0.322213362	0.322213362	0.322213362	0.322213362	0.322213362
78	0.32203896	0.32203896	0.32203896	0.32203896	0.32203896	0.32203896	0.32203896	0.32203896	0.32203896	0.32203896	0.32203896	0.32203896	0.32203896	0.32203896	0.32203896	0.32203896	0.32203896	0.32203896	0.32203896	0.32203896	0.32203896	0.32203896	0.32203896	0.32203896	0.32203896	0.32203896	0.32203896	0.32203896	0.32203896	0.32203896	0.32203896	0.32203896	0.32203896	0.32203896	0.32203896	0.32203896	0.32203896	0.32203896	0.32203896	0.32203896	0.32203896	0.32203896	0.32203896	0.32203896	0.32203896	0.32203896	0.32203896	0.32203896	0.32203896
79	0.321906603	0.321906603	0.321906603	0.321906603	0.321906603	0.321906603	0.321906603	0.321906603	0.321906603	0.321906603	0.321906603	0.321906603	0.321906603	0.321906603	0.321906603	0.321906603	0.321906603	0.321906603	0.321906603	0.321906603	0.321906603	0.321906603	0.321906603	0.321906603	0.321906603	0.321906603	0.321906603	0.321906603	0.321906603	0.321906603	0.321906603	0.321906603	0.321906603	0.321906603	0.321906603	0.321906603	0.321906603	0.321906603	0.321906603	0.321906603	0.321906603	0.321906603	0.321906603	0.321906603	0.321906603	0.321906603	0.321906603	0.321906603	0.321906603
80	0.321811194	0.321811194	0.321811194	0.321811194	0.321811194	0.321811194	0.321811194	0.321811194	0.321811194	0.321811194	0.321811194	0.321811194	0.321811194	0.321811194	0.321811194	0.321811194	0.321811194	0.321811194	0.321811194	0.321811194	0.321811194	0.321811194	0.321811194	0.321811194	0.321811194	0.321811194	0.321811194	0.321811194	0.321811194	0.321811194	0.321811194	0.321811194	0.321811194	0.321811194	0.321811194	0.321811194	0.321811194	0.321811194	0.321811194	0.321811194	0.321811194	0.321811194	0.321811194	0.321811194	0.321811194	0.321811194	0.321811194	0.321811194	0.321811194
81	0.321749349	0.321749349	0.321749349	0.321749349	0.321749349	0.321749349	0.321749349	0.321749349	0.321749349	0.321749349	0.321749349	0.321749349	0.321749349	0.321749349	0.321749349	0.321749349	0.321749349	0.321749349	0.321749349	0.321749349	0.321749349	0.321749349	0.321749349	0.321749349	0.321749349	0.321749349	0.321749349	0.321749349	0.321749349	0.321749349	0.321749349	0.321749349	0.321749349	0.321749349	0.321749349	0.321749349	0.321749349	0.321749349	0.321749349	0.321749349	0.321749349	0.321749349	0.321749349	0.321749349	0.321749349	0.321749349	0.321749349	0.321749349	0.321749349
82	0.32171713	0.32171713	0.32171713	0.32171713	0.32171713	0.32171713	0.32171713	0.32171713	0.32171713	0.32171713	0.32171713	0.32171713	0.32171713	0.32171713	0.32171713	0.32171713	0.32171713	0.32171713	0.32171713	0.32171713	0.32171713	0.32171713	0.32171713	0.32171713	0.32171713	0.32171713	0.32171713	0.32171713	0.32171713	0.32171713	0.32171713	0.32171713	0.32171713	0.32171713	0.32171713	0.32171713	0.32171713	0.32171713	0.32171713	0.32171713	0.32171713	0.32171713	0.32171713	0.32171713	0.32171713	0.32171713	0.32171713	0.32171713	0.32171713
83	0.321710044	0.321710044	0.321710044	0.321710044	0.321710044	0.321710044	0.321710044	0.321710044	0.321710044	0.321710044	0.321710044	0.321710044	0.321710044	0.321710044	0.321710044	0.321710044	0.321710044	0.321710044	0.321710044	0.321710044	0.321710044	0.321710044	0.321710044	0.321710044	0.321710044	0.321710044	0.321710044	0.321710044	0.321710044	0.321710044	0.321710044	0.321710044	0.321710044	0.321710044	0.321710044	0.321710044	0.321710044	0.321710044	0.321710044	0.321710044	0.321710044	0.321710044	0.321710044	0.321710044	0.321710044	0.321710044	0.321710044	0.321710044	0.321710044
84	0.321737963	0.321737963	0.321737963	0.321737963	0.321737963	0.321737963	0.321737963	0.321737963	0.321737963	0.321737963	0.321737963	0.321737963	0.321737963	0.321737963	0.321737963	0.321737963	0.321737963	0.321737963	0.321737963	0.321737963	0.321737963	0.321737963	0.321737963	0.321737963	0.321737963	0.321737963	0.321737963	0.321737963	0.321737963	0.321737963	0.321737963	0.321737963	0.321737963	0.321737963	0.321737963	0.321737963	0.321737963	0.321737963	0.321737963	0.321737963	0.321737963	0.321737963	0.321737963	0.321737963	0.321737963	0.321737963	0.321737963	0.321737963	0.321737963
85	0.321791234	0.321791234	0.321791234	0.321791234	0.321791234	0.321791234	0.321791234	0.321791234	0.321791234	0.321791234	0.321791234	0.321791234	0.321791234	0.321791234	0.321791234	0.321791234	0.321791234	0.321791234	0.321791234	0.321791234	0.321791234	0.321791234	0.321791234	0.321791234	0.321791234	0.321791234	0.321791234	0.321791234	0.321791234	0.321791234	0.321791234	0.321791234	0.321791234	0.321791234	0.321791234	0.321791234	0.321791234	0.321791234	0.321791234	0.321791234	0.321791234	0.321791234	0.321791234	0.321791234	0.321791234	0.321791234	0.321791234	0.321791234	0.321791234
86	0.321865493	0.321865493	0.321865493	0.321865493	0.321865493	0.321865493	0.321865493	0.321865493	0.321865493	0.321865493	0.321865493	0.321865493	0.321865493	0.321865493	0.321865493	0.321865493	0.321865493	0.321865493	0.321865493	0.321865493	0.321865493	0.321865493	0.321865493	0.321865493	0.321865493	0.321865493	0.321865493	0.321865493	0.321865493	0.321865493	0.321865493	0.321865493	0.321865493	0.321865493	0.321865493	0.321865493	0.321865493	0.321865493	0.321865493	0.321865493	0.321865493	0.321865493	0.321865493	0.321865493	0.321865493	0.321865493	0.321865493	0.321865493	0.321865493
87	0.32195692	0.32195692	0.32195692	0.32195692	0.32195692	0.32195692	0.32195692	0.32195692	0.32195692	0.32195692	0.32195692	0.32195692	0.32195692	0.32195692	0.32195692	0.32195692	0.32195692	0.32195692	0.32195692	0.32195692	0.32195692	0.32195692	0.32195692	0.32195692	0.32195692	0.32195692	0.32195692	0.32195692	0.32195692	0.32195692	0.32195692	0.32195692	0.32195692	0.32195692	0.32195692	0.32195692	0.32195692	0.32195692	0.32195692	0.32195692	0.32195692	0.32195692	0.32195692	0.32195692	0.32195692	0.32195692	0.32195692	0.32195692	0.32195692
88	0.322061405	0.322061405	0.322061405	0.322061405	0.322061405	0.322061405	0.322061405	0.322061405	0.322061405	0.322061405	0.322061405	0.322061405	0.322061405	0.322061405	0.322061405	0.322061405	0.322061405	0.322061405	0.322061405	0.322061405	0.322061405	0.322061405	0.322061405	0.322061405	0.322061405	0.322061405	0.322061405	0.322061405	0.322061405	0.322061405	0.322061405	0.322061405	0.322061405	0.322061405	0.322061405	0.322061405	0.322061405	0.322061405	0.322061405	0.322061405	0.322061405	0.322061405	0.322061405	0.322061405	0.322061405	0.322061405	0.322061405	0.322061405	0.322061405
89	0.32217762	0.32217762	0.32217762	0.32217762	0.32217762	0.32217762	0.32217762	0.32217762	0.32217762	0.32217762	0.32217762	0.32217762	0.32217762	0.32217762	0.32217762	0.32217762	0.32217762	0.32217762	0.32217762	0.32217762	0.32217762	0.32217762	0.32217762	0.32217762	0.32217762	0.32217762	0.32217762	0.32217762	0.32217762	0.32217762	0.32217762	0.32217762	0.32217762	0.32217762	0.32217762	0.32217762	0.32217762	0.32217762	0.32217762	0.32217762	0.32217762	0.32217762	0.32217762	0.32217762	0.32217762	0.32217762	0.32217762	0.32217762	0.32217762
90	0.322312258	0.322312258	0.322312258	0.322312258	0.322312258	0.322312258	0.322312258	0.322312258	0.322312258	0.322312258	0.322312258	0.322312258	0.322312258	0.322312258	0.322312258	0.322312258	0.322312258	0.322312258	0.322312258	0.322312258	0.322312258	0.322312258	0.322312258	0.322312258	0.322312258	0.322312258	0.322312258	0.322312258	0.322312258	0.322312258	0.322312258	0.322312258	0.322312258	0.322312258	0.322312258	0.322312258	0.322312258	0.322312258	0.322312258	0.322312258	0.322312258	0.322312258	0.322312258	0.322312258	0.322312258	0.322312258	0.322312258	0.322312258	0.322312258
91	0.322456046	0.322456046	0.322456046	0.322456046	0.322456046	0.322456046	0.322456046	0.322456046	0.322456046	0.322456046	0.322456046	0.322456046	0.322456046	0.322456046	0.322456046	0.322456046	0.322456046	0.322456046	0.322456046	0.322456046	0.322456046	0.322456046	0.322456046	0.322456046	0.322456046	0.322456046	0.322456046	0.322456046	0.322456046	0.322456046	0.322456046	0.322456046	0.322456046	0.322456046	0.322456046	0.322456046	0.322456046	0.322456046	0.322456046	0.322456046	0.322456046	0.322456046	0.322456046	0.322456046	0.322456046	0.322456046	0.322456046	0.322456046	0.322456046
92	0.322606255	0.322606255	0.322606255	0.322606255	0.322606255	0.322606255	0.322606255	0.322606255	0.322606255	0.322606255	0.322606255	0.322606255	0.322606255	0.322606255	0.322606255	0.322606255	0.322606255	0.322606255	0.322606255	0.322606255	0.322606255	0.322606255	0.322606255	0.322606255	0.322606255	0.322606255	0.322606255	0.322606255	0.322606255	0.322606255	0.322606255	0.322606255	0.322606255	0.322606255	0.322606255	0.322606255	0.322606255	0.322606255	0.322606255	0.322606255	0.322606255	0.322606255	0.322606255	0.322606255	0.322606255	0.322606255	0.322606255	0.322606255	0.322606255
93	0.322760109	0.322760109	0.322760109	0.322760109	0.322760109	0.322760109	0.322760109	0.322760109	0.322760109	0.322760109	0.322760109	0.322760109	0.322760109	0.322760109	0.322760109	0.322760109	0.322760109	0.322760109	0.322760109	0.322760109	0.322760109	0.322760109	0.322760109	0.322760109	0.322760109	0.322760109	0.322760109	0.322760109	0.322760109	0.322760109	0.322760109	0.322760109	0.322760109	0.322760109	0.322760109	0.322760109	0.322760109	0.322760109	0.322760109	0.322760109	0.322760109	0.322760109	0.322760109	0.322760109	0.322760109	0.322760109	0.322760109	0.322760109	0.322760109
94	0.322914792	0.322914792	0.322914792	0.322914792	0.322914792	0.322914792	0.322914792	0.322914792	0.322914792	0.322914792	0.322914792	0.322914792	0.322914792	0.322914792	0.322914792	0.322914792	0.322914792	0.322914792	0.322914792	0.322914792	0.322914792	0.322914792	0.322914792	0.322914792	0.322914792	0.322914792	0.322914792	0.322914792	0.322914792	0.322914792	0.322914792	0.322914792	0.322914792	0.322914792	0.322914792	0.322914792	0.322914792	0.322914792	0.322914792	0.322914792	0.322914792	0.322914792	0.322914792	0.322914792	0.322914792	0.322914792	0.322914792	0.322914792	0.322914792
95	0.323071853	0.323071853	0.323071853	0.323071853	0.323071853	0.323071853	0.323071853	0.323071853	0.323071853	0.323071853	0.323071853	0.323071853	0.323071853	0.323071853	0.323071853	0.323071853	0.323071853	0.323071853	0.323071853	0.323071853	0.323071853	0.323071853	0.323071853	0.323071853	0.323071853	0.323071853	0.323071853	0.323071853	0.323071853	0.323071853	0.323071853	0.323071853	0.323071853	0.323071853	0.323071853	0.323071853	0.323071853	0.323071853	0.323071853	0.323071853	0.323071853	0.323071853	0.323071853	0.323071853	0.323071853	0.323071853	0.323071853	0.323071853	0.323071853
96	0.323231272	0.323231272	0.323231272	0.323231272	0.323231272	0.323231272	0.323231272	0.323231272	0.323231272	0.323231272	0.323231272	0.323231272	0.323231272	0.323231272	0.323231272	0.323231272	0.323231272	0.323231272	0.323231272	0.323231272	0.323231272	0.323231272	0.323231272	0.323231272	0.323231272	0.323231272	0.323231272	0.323231272	0.323231272	0.323231272	0.323231272	0.323231272	0.323231272	0.323231272	0.323231272	0.323231272	0.323231272	0.323231272	0.323231272	0.323231272	0.323231272	0.323231272	0.323231272	0.323231272	0.323231272	0.323231272	0.323231272	0.323231272	0.323231272
97	0.323389053	0.323389053	0.323389053	0.323389053	0.323389053	0.323389053	0.323389053	0.323389053	0.323389053	0.323389053	0.323389053	0.323389053	0.323389053	0.323389053	0.323389053	0.323389053	0.323389053	0.323389053	0.323389053	0.323389053	0.323389053	0.323389053	0.323389053	0.323389053	0.323389053	0.323389053	0.323389053	0.323389053	0.323389053	0.323389053	0.323389053	0.323389053	0.323389053	0.323389053	0.323389053	0.323389053	0.323389053	0.323389053	0.323389053	0.323389053	0.323389053	0.323389053	0.323389053	0.323389053	0.323389053	0.323389053	0.323389053	0.323389053	0.323389053
98	0.323543703	0.323543703	0.323543703	0.323543703	0.323543703	0.323543703	0.323543703	0.323543703	0.323543703	0.323543703	0.323543703	0.323543703	0.323543703	0.323543703	0.323543703	0.323543703	0.323543703	0.323543703	0.323543703	0.323543703	0.323543703	0.323543703	0.323543703	0.323543703	0.323543703	0.323543703	0.323543703	0.323543703	0.323543703	0.323543703	0.323543703	0.323543703	0.323543703	0.323543703	0.323543703	0.323543703	0.323543703	0.323543703	0.323543703	0.323543703	0.323543703	0.323543703	0.323543703	0.323543703	0.323543703	0.323543703	0.323543703	0.323543703	0.323543703
99	0.323693824	0.323693824	0.323693824	0.323693824	0.323693824	0.323693824	0.323693824	0.323693824	0.323693824	0.323693824	0.323693824	0.323693824	0.323693824	0.323693824	0.323693824	0.323693824	0.323693824	0.323693824	0.323693824	0.323693824	0.323693824	0.323693824	0.323693824	0.323693824	0.323693824	0.323693824	0.323693824	0.323693824	0.323693824	0.323693824	0.323693824	0.323693824	0.323693824	0.323693824	0.323693824	0.323693824	0.323693824	0.323693824	0.323693824	0.323693824	0.323693824	0.323693824	0.323693824	0.323693824	0.323693824	0.323693824	0.323693824	0.323693824	0.323693824
100	0.323838115	0.323838115	0.323838115	0.323838115	0.323838115	0.323838115	0.323838115	0.323838115	0.323838115	0.323838115	0.323838115	0.323838115	0.323838115	0.323838115	0.323838115	0.323838115	0.323838115	0.323838115	0.323838115	0.323838115	0.323838115	0.323838115	0.323838115	0.323838115	0.323838115	0.323838115	0.323838115	0.323838115	0.323838115	0.323838115	0.323838115	0.323838115	0.323838115	0.323838115	0.323838115	0.323838115	0.323838115	0.323838115	0.323838115	0.323838115	0.323838115	0.323838115	0.323838115	0.323838115	0.323838115	0.323838115	0.323838115	0.323838115	0.323838115
101	0.323977995	0.323977995	0.323977995	0.323977995	0.323977995	0.323977995	0.323977995	0.323977995	0.323977995	0.323977995	0.323977995	0.323977995	0.323977995	0.323977995	0.323977995	0.323977995	0.323977995	0.323977995	0.323977995	0.323977995	0.323977995	0.323977995	0.323977995	0.323977995	0.323977995	0.323977995	0.323977995	0.323977995	0.323977995	0.323977995	0.323977995	0.323977995	0.323977995	0.323977995	0.323977995	0.323977995	0.323977995	0.323977995	0.323977995	0.323977995	0.323977995	0.323977995	0.323977995	0.323977995	0.323977995	0.323977995	0.323977995	0.323977995	0.323977995
102	0.324111357	0.324111357	0.324111357	0.324111357	0.324111357	0.324111357	0.324111357	0.324111357	0.324111357	0.324111357	0.324111357	0.324111357	0.324111357	0.324111357	0.324111357	0.324111357	0.324111357	0.324111357	0.324111357	0.324111357	0.324111357	0.324111357	0.324111357	0.324111357	0.324111357	0.324111357	0.324111357	0.324111357	0.324111357	0.324111357	0.324111357	0.324111357	0.324111357	0.324111357	0.324111357	0.324111357	0.324111357	0.324111357	0.324111357	0.324111357	0.324111357	0.324111357	0.324111357	0.324111357	0.324111357	0.324111357	0.324111357	0.324111357	0.324111357
103	0.324237217	0.324237217	0.324237217	0.324237217	0.324237217	0.324237217	0.324237217	0.324237217	0.324237217	0.324237217	0.324237217	0.324237217	0.324237217	0.324237217	0.324237217	0.324237217	0.324237217	0.324237217	0.324237217	0.324237217	0.324237217	0.324237217	0.324237217	0.324237217	0.324237217	0.324237217	0.324237217	0.324237217	0.324237217	0.324237217	0.324237217	0.324237217	0.324237217	0.324237217	0.324237217	0.324237217	0.324237217	0.324237217	0.324237217	0.324237217	0.324237217	0.324237217	0.324237217	0.324237217	0.324237217	0.324237217	0.324237217	0.324237217	0.324237217
104	0.32435496	0.32435496	0.32435496	0.32435496	0.32435496	0.32435496	0.32435496	0.32435496	0.32435496	0.32435496	0.32435496	0.32435496	0.32435496	0.32435496	0.32435496	0.32435496	0.32435496	0.32435496	0.32435496	0.32435496	0.32435496	0.32435496	0.32435496	0.32435496	0.32435496	0.32435496	0.32435496	0.32435496	0.32435496	0.32435496	0.32435496	0.32435496	0.32435496	0.32435496	0.32435496	0.32435496	0.32435496	0.32435496	0.32435496	0.32435496	0.32435496	0.32435496	0.32435496	0.32435496	0.32435496	0.32435496	0.32435496	0.32435496	0.32435496
105	0.324464089	0.324464089	0.324464089	0.324464089	0.324464089	0.324464089	0.324464089	0.324464089	0.324464089	0.324464089	0.324464089	0.324464089	0.324464089	0.324464089	0.324464089	0.324464089	0.324464089	0.324464089	0.324464089	0.324464089	0.324464089	0.324464089	0.324464089	0.324464089	0.324464089	0.324464089	0.324464089	0.324464089	0.324464089	0.324464089	0.324464089	0.324464089	0.324464089	0.324464089	0.324464089	0.324464089	0.324464089	0.324464089	0.324464089	0.324464089	0.324464089	0.324464089	0.324464089	0.324464089	0.324464089	0.324464089	0.324464089	0.324464089	0.324464089
106	0.324564228	0.324564228	0.324564228	0.324564228	0.324564228	0.324564228	0.324564228	0.324564228	0.324564228	0.324564228	0.324564228	0.324564228	0.324564228	0.324564228	0.324564228	0.324564228	0.324564228	0.324564228	0.324564228	0.324564228	0.324564228	0.324564228	0.324564228	0.324564228	0.324564228	0.324564228	0.324564228	0.324564228	0.324564228	0.324564228	0.324564228	0.324564228	0.324564228	0.324564228	0.324564228	0.324564228	0.324564228	0.324564228	0.324564228	0.324564228	0.324564228	0.324564228	0.324564228	0.324564228	0.324564228	0.324564228	0.324564228	0.324564228	0.324564228
107	0.324655118	0.324655118	0.324655118	0.324655118	0.324655118	0.324655118	0.324655118	0.324655118	0.324655118	0.324655118	0.324655118	0.324655118	0.324655118	0.324655118	0.324655118	0.324655118	0.324655118	0.324655118	0.324655118	0.324655118	0.324655118	0.324655118	0.324655118	0.324655118	0.324655118	0.324655118	0.324655118	0.324655118	0.324655118	0.324655118	0.324655118	0.324655118	0.324655118	0.324655118	0.324655118	0.324655118	0.324655118	0.324655118	0.324655118	0.324655118	0.324655118	0.324655118	0.324655118	0.324655118	0.324655118	0.324655118	0.324655118	0.324655118	0.324655118
108	0.324736595	0.324736595	0.324736595	0.324736595	0.324736595	0.324736595	0.324736595	0.324736595	0.324736595	0.324736595	0.324736595	0.324736595	0.324736595	0.324736595	0.324736595	0.324736595	0.324736595	0.324736595	0.324736595	0.324736595	0.324736595	0.324736595	0.324736595	0.324736595	0.324736595	0.324736595	0.324736595	0.324736595	0.324736595	0.324736595	0.324736595	0.324736595	0.324736595	0.324736595	0.324736595	0.324736595	0.324736595	0.324736595	0.324736595	0.324736595	0.324736595	0.324736595	0.324736595	0.324736595	0.324736595	0.324736595	0.324736595	0.324736595	0.324736595
109	0.324808519	0.324808519	0.324808519	0.324808519	0.324808519	0.324808519	0.324808519	0.324808519	0.324808519	0.324808519	0.324808519	0.324808519	0.324808519	0.324808519	0.324808519	0.324808519	0.324808519	0.324808519	0.324808519	0.324808519	0.324808519	0.324808519	0.324808519	0.324808519	0.324808519	0.324808519	0.324808519	0.324808519	0.324808519	0.324808519	0.324808519	0.324808519	0.324808519	0.324808519	0.324808519	0.324808519	0.324808519	0.324808519	0.324808519	0.324808519	0.324808519	0.324808519	0.324808519	0.324808519	0.324808519	0.324808519	0.324808519	0.324808519	0.324808519
110	0.324871056	0.324871056	0.324871056	0.324871056	0.324871056	0.324871056	0.324871056	0.324871056	0.324871056	0.324871056	0.324871056	0.324871056	0.324871056	0.324871056	0.324871056	0.324871056	0.324871056	0.324871056	0.324871056	0.324871056	0.324871056	0.324871056	0.324871056	0.324871056	0.324871056	0.324871056	0.324871056	0.324871056	0.324871056	0.324871056	0.324871056	0.324871056	0.324871056	0.324871056	0.324871056	0.324871056	0.324871056	0.324871056	0.324871056	0.324871056	0.324871056	0.324871056	0.324871056	0.324871056	0.324871056	0.324871056	0.324871056	0.324871056	0.324871056
111	0.324924412	0.324924412	0.324924412	0.324924412	0.324924412	0.324924412	0.324924412	0.324924412	0.324924412	0.324924412	0.324924412	0.324924412	0.324924412	0.324924412	0.324924412	0.324924412	0.324924412	0.324924412	0.324924412	0.324924412	0.324924412	0.324924412	0.324924412	0.324924412	0.324924412	0.324924412	0.324924412	0.324924412	0.324924412	0.324924412	0.324924412	0.324924412	0.324924412	0.324924412	0.324924412	0.324924412	0.324924412	0.324924412	0.324924412	0.324924412	0.324924412	0.324924412	0.324924412	0.324924412	0.324924412	0.324924412	0.324924412	0.324924412	0.324924412
112	0.324968907	0.324968907	0.324968907	0.324968907	0.324968907	0.324968907	0.324968907	0.324968907	0.324968907	0.324968907	0.324968907	0.324968907	0.324968907	0.324968907	0.324968907	0.324968907	0.324968907	0.324968907	0.324968907	0.324968907	0.324968907	0.324968907	0.324968907	0.324968907	0.324968907	0.324968907	0.324968907	0.324968907	0.324968907	0.324968907	0.324968907	0.324968907	0.324968907	0.324968907	0.324968907	0.324968907	0.324968907	0.324968907	0.324968907	0.324968907	0.324968907	0.324968907	0.324968907	0.324968907	0.324968907	0.324968907	0.324968907	0.324968907	0.324968907
113	0.32500498	0.32500498	0.32500498	0.32500498	0.32500498	0.32500498	0.32500498	0.32500498	0.32500498	0.32500498	0.32500498	0.32500498	0.32500498	0.32500498	0.32500498	0.32500498	0.32500498	0.32500498	0.32500498	0.32500498	0.32500498	0.32500498	0.32500498	0.32500498	0.32500498	0.32500498	0.32500498	0.32500498	0.32500498	0.32500498	0.32500498	0.32500498	0.32500498	0.32500498	0.32500498	0.32500498	0.32500498	0.32500498	0.32500498	0.32500498	0.32500498	0.32500498	0.32500498	0.32500498	0.32500498	0.32500498	0.32500498	0.32500498	0.32500498
114	0.325033187	0.325033187	0.325033187	0.325033187	0.325033187	0.325033187	0.325033187	0.325033187	0.325033187	0.325033187	0.325033187	0.325033187	0.325033187	0.325033187	0.325033187	0.325033187	0.325033187	0.325033187	0.325033187	0.325033187	0.325033187	0.325033187	0.325033187	0.325033187	0.325033187	0.325033187	0.325033187	0.325033187	0.325033187	0.325033187	0.325033187	0.325033187	0.325033187	0.325033187	0.325033187	0.325033187	0.325033187	0.325033187	0.325033187	0.325033187	0.325033187	0.325033187	0.325033187	0.325033187	0.325033187	0.325033187	0.325033187	0.325033187	0.325033187
115	0.325054204	0.325054204	0.325054204	0.325054204	0.325054204	0.325054204	0.325054204	0.325054204	0.325054204	0.325054204	0.325054204	0.325054204	0.325054204	0.325054204	0.325054204	0.325054204	0.325054204	0.325054204	0.325054204	0.325054204	0.325054204	0.325054204	0.325054204	0.325054204	0.325054204	0.325054204	0.325054204	0.325054204	0.325054204	0.325054204	0.325054204	0.325054204	0.325054204	0.325054204	0.325054204	0.325054204	0.325054204	0.325054204	0.325054204	0.325054204	0.325054204	0.325054204	0.325054204	0.325054204	0.325054204	0.325054204	0.325054204	0.325054204	0.325054204
116	0.325067065	0.325067065	0.325067065	0.325067065	0.325067065	0.325067065	0.325067065	0.325067065	0.325067065	0.325067065	0.325067065	0.325067065	0.325067065	0.325067065	0.325067065	0.325067065	0.325067065	0.325067065	0.325067065	0.325067065	0.325067065	0.325067065	0.325067065	0.325067065	0.325067065	0.325067065	0.325067065	0.325067065	0.325067065	0.325067065	0.325067065	0.325067065	0.325067065	0.325067065	0.325067065	0.325067065	0.325067065	0.325067065	0.325067065	0.325067065	0.325067065	0.325067065	0.325067065	0.325067065	0.325067065	0.325067065	0.325067065	0.325067065	0.325067065
117	0.325071311	0.325071311	0.325071311	0.325071311	0.325071311	0.325071311	0.325071311	0.325071311	0.325071311	0.325071311	0.325071311	0.325071311	0.325071311	0.325071311	0.325071311	0.325071311	0.325071311	0.325071311	0.325071311	0.325071311	0.325071311	0.325071311	0.325071311	0.325071311	0.325071311	0.325071311	0.325071311	0.325071311	0.325071311	0.325071311	0.325071311	0.325071311	0.325071311	0.325071311	0.325071311	0.325071311	0.325071311	0.325071311	0.325071311	0.325071311	0.325071311	0.325071311	0.325071311	0.325071311	0.325071311	0.325071311	0.325071311	0.325071311	0.325071311
118	0.32506906	0.32506906	0.32506906	0.32506906	0.32506906	0.32506906	0.32506906	0.32506906	0.32506906	0.32506906	0.32506906	0.32506906	0.32506906	0.32506906	0.32506906	0.32506906	0.32506906	0.32506906	0.32506906	0.32506906	0.32506906	0.32506906	0.32506906	0.32506906	0.32506906	0.32506906	0.32506906	0.32506906	0.32506906	0.32506906	0.32506906	0.32506906	0.32506906	0.32506906	0.32506906	0.32506906	0.32506906	0.32506906	0.32506906	0.32506906	0.32506906	0.32506906	0.32506906	0.32506906	0.32506906	0.32506906	0.32506906	0.32506906	0.32506906
119	0.325061077	0.325061077	0.325061077	0.325061077	0.325061077	0.325061077	0.325061077	0.325061077	0.325061077	0.325061077	0.325061077	0.325061077	0.325061077	0.325061077	0.325061077	0.325061077	0.325061077	0.325061077	0.325061077	0.325061077	0.325061077	0.325061077	0.325061077	0.325061077	0.325061077	0.325061077	0.325061077	0.325061077	0.325061077	0.325061077	0.325061077	0.325061077	0.325061077	0.325061077	0.325061077	0.325061077	0.325061077	0.325061077	0.325061077	0.325061077	0.325061077	0.325061077	0.325061077	0.325061077	0.325061077	0.325061077	0.325061077	0.325061077	0.325061077
120	0.325048221	0.325048221	0.325048221	0.325048221	0.325048221	0.325048221	0.325048221	0.325048221	0.325048221	0.325048221	0.325048221	0.325048221	0.325048221	0.325048221	0.325048221	0.325048221	0.325048221	0.325048221	0.325048221	0.325048221	0.325048221	0.325048221	0.325048221	0.325048221	0.325048221	0.325048221	0.325048221	0.325048221	0.325048221	0.325048221	0.325048221	0.325048221	0.325048221	0.325048221	0.325048221	0.325048221	0.325048221	0.325048221	0.325048221	0.325048221	0.325048221	0.325048221	0.325048221	0.325048221	0.325048221	0.325048221	0.325048221	0.325048221	0.325048221
121	0.325031436	0.325031436	0.325031436	0.325031436	0.325031436	0.325031436	0.325031436	0.325031436	0.325031436	0.325031436	0.325031436	0.325031436	0.325031436	0.325031436	0.325031436	0.325031436	0.325031436	0.325031436	0.325031436	0.325031436	0.325031436	0.325031436	0.325031436	0.325031436	0.325031436	0.325031436	0.325031436	0.325031436	0.325031436	0.325031436	0.325031436	0.325031436	0.325031436	0.325031436	0.325031436	0.325031436	0.325031436	0.325031436	0.325031436	0.325031436	0.325031436	0.325031436	0.325031436	0.325031436	0.325031436	0.325031436	0.325031436	0.325031436	0.325031436
122	0.32501176	0.32501176	0.32501176	0.32501176	0.32501176	0.32501176	0.32501176	0.32501176	0.32501176	0.32501176	0.32501176	0.32501176	0.32501176	0.32501176	0.32501176	0.32501176	0.32501176	0.32501176	0.32501176	0.32501176	0.32501176	0.32501176	0.32501176	0.32501176	0.32501176	0.32501176	0.32501176	0.32501176	0.32501176	0.32501176	0.32501176	0.32501176	0.32501176	0.32501176	0.32501176	0.32501176	0.32501176	0.32501176	0.32501176	0.32501176	0.32501176	0.32501176	0.32501176	0.32501176	0.32501176	0.32501176	0.32501176	0.32501176	0.32501176
123	0.32499032	0.32499032	0.32499032	0.32499032	0.32499032	0.32499032	0.32499032	0.32499032	0.32499032	0.32499032	0.32499032	0.32499032	0.32499032	0.32499032	0.32499032	0.32499032	0.32499032	0.32499032	0.32499032	0.32499032	0.32499032	0.32499032	0.32499032	0.32499032	0.32499032	0.32499032	0.32499032	0.32499032	0.32499032	0.32499032	0.32499032	0.32499032	0.32499032	0.32499032	0.32499032	0.32499032	0.32499032	0.32499032	0.32499032	0.32499032	0.32499032	0.32499032	0.32499032	0.32499032	0.32499032	0.32499032	0.32499032	0.32499032	0.32499032
124	0.324962836	0.324962836	0.324962836	0.324962836	0.324962836	0.324962836	0.324962836	0.324962836	0.324962836	0.324962836	0.324962836	0.324962836	0.324962836	0.324962836	0.324962836	0.324962836	0.324962836	0.324962836	0.324962836	0.324962836	0.324962836	0.324962836	0.324962836	0.324962836	0.324962836	0.324962836	0.324962836	0.324962836	0.324962836	0.324962836	0.324962836	0.324962836	0.324962836	0.324962836	0.324962836	0.324962836	0.324962836	0.324962836	0.324962836	0.324962836	0.324962836	0.324962836	0.324962836	0.324962836	0.324962836	0.324962836	0.324962836	0.324962836	0.324962836
125	0.324931696	0.324931696	0.324931696	0.324931696	0.324931696	0.324931696	0.324931696	0.324931696	0.324931696	0.324931696	0.324931696	0.324931696	0.324931696	0.324931696	0.324931696	0.324931696	0.324931696	0.324931696	0.324931696	0.324931696	0.324931696	0.324931696	0.324931696	0.324931696	0.324931696	0.324931696	0.324931696	0.324931696	0.324931696	0.324931696	0.324931696	0.324931696	0.324931696	0.324931696	0.324931696	0.324931696	0.324931696	0.324931696	0.324931696	0.324931696	0.324931696	0.324931696	0.324931696	0.324931696	0.324931696	0.324931696	0.324931696	0.324931696	0.324931696
126	0.324898806	0.324898806	0.324898806	0.324898806	0.324898806	0.324898806	0.324898806	0.324898806	0.324898806	0.324898806	0.324898806	0.324898806	0.324898806	0.324898806	0.324898806	0.324898806	0.324898806	0.324898806	0.324898806	0.324898806	0.324898806	0.324898806	0.324898806	0.324898806	0.324898806	0.324898806	0.324898806	0.324898806	0.324898806	0.324898806	0.324898806	0.324898806	0.324898806	0.324898806	0.324898806	0.324898806	0.324898806	0.324898806	0.324898806	0.324898806	0.324898806	0.324898806	0.324898806	0.324898806	0.324898806	0.324898806	0.324898806	0.324898806	0.324898806
127	0.324864949	0.324864949	0.324864949	0.324864949	0.324864949	0.324864949	0.324864949	0.324864949	0.324864949	0.324864949	0.324864949	0.324864949	0.324864949	0.324864949	0.324864949	0.324864949	0.324864949	0.324864949	0.324864949	0.324864949	0.324864949	0.324864949	0.324864949	0.324864949	0.324864949	0.324864949	0.324864949	0.324864949	0.324864949	0.324864949	0.324864949	0.324864949	0.324864949	0.324864949	0.324864949	0.324864949	0.324864949	0.324864949	0.324864949	0.324864949	0.324864949	0.324864949	0.324864949	0.324864949	0.324864949	0.324864949	0.324864949	0.324864949	0.324864949
128	0.324830944	0.324830944	0.324830944	0.324830944	0.324830944	0.324830944	0.324830944	0.324830944	0.324830944	0.324830944	0.324830944	0.324830944	0.324830944	0.324830944	0.324830944	0.324830944	0.324830944	0.324830944	0.324830944	0.324830944	0.324830944	0.324830944	0.324830944	0.324830944	0.324830944	0.324830944	0.324830944	0.324830944	0.324830944	0.324830944	0.324830944	0.324830944	0.324830944	0.324830944	0.324830944	0.324830944	0.324830944	0.324830944	0.324830944	0.324830944	0.324830944	0.324830944	0.324830944	0.324830944	0.324830944	0.324830944	0.324830944	0.324830944	0.324830944
129	0.324797652	0.324797652	0.324797652	0.324797652	0.324797652	0.324797652	0.324797652	0.324797652	0.324797652	0.324797652	0.324797652	0.324797652	0.324797652	0.324797652	0.324797652	0.324797652	0.324797652	0.324797652	0.324797652	0.324797652	0.324797652	0.324797652	0.324797652	0.324797652	0.324797652	0.324797652	0.324797652	0.324797652	0.324797652	0.324797652	0.324797652	0.324797652	0.324797652	0.324797652	0.324797652	0.324797652	0.324797652	0.324797652	0.324797652	0.324797652	0.324797652	0.324797652	0.324797652	0.324797652	0.324797652	0.324797652	0.324797652	0.324797652	0.324797652
130	0.324765971	0.324765971	0.324765971	0.324765971	0.324765971	0.324765971	0.324765971	0.324765971	0.324765971	0.324765971	0.324765971	0.324765971	0.324765971	0.324765971	0.324765971	0.324765971	0.324765971	0.324765971	0.324765971	0.324765971	0.324765971	0.324765971	0.324765971	0.324765971	0.324765971	0.324765971	0.324765971	0.324765971	0.324765971	0.324765971	0.324765971	0.324765971	0.324765971	0.324765971	0.324765971	0.324765971	0.324765971	0.324765971	0.324765971	0.324765971	0.324765971	0.324765971	0.324765971	0.324765971	0.324765971	0.324765971	0.324765971	0.324765971	0.324765971
131	0.324736321	0.324736321	0.324736321	0.324736321	0.324736321	0.324736321	0.324736321	0.324736321	0.324736321	0.324736321	0.324736321	0.324736321	0.324736321	0.324736321	0.324736321	0.324736321	0.324736321	0.324736321	0.324736321	0.324736321	0.324736321	0.324736321	0.324736321	0.324736321	0.324736321	0.324736321	0.324736321	0.324736321	0.324736321	0.324736321	0.324736321	0.324736321	0.324736321	0.324736321	0.324736321	0.324736321	0.324736321	0.324736321	0.324736321	0.324736321	0.324736321	0.324736321	0.324736321	0.324736321	0.324736321	0.324736321	0.324736321	0.324736321	0.324736321
132	0.32470322	0.32470322	0.32470322	0.32470322	0.32470322	0.32470322	0.32470322	0.32470322	0.32470322	0.32470322	0.32470322	0.32470322	0.32470322	0.32470322	0.32470322	0.32470322	0.32470322	0.32470322	0.32470322	0.32470322	0.32470322	0.32470322	0.32470322	0.32470322	0.32470322	0.32470322	0.32470322	0.32470322	0.32470322	0.32470322	0.32470322	0.32470322	0.32470322	0.32470322	0.32470322	0.32470322	0.32470322	0.32470322	0.32470322	0.32470322	0.32470322	0.32470322	0.32470322	0.32470322	0.32470322	0.32470322	0.32470322	0.32470322	0.32470322
133	0.324671253	0.324671253	0.324671253	0.324671253	0.324671253	0.324671253	0.324671253	0.324671253	0.324671253	0.324671253	0.324671253	0.324671253	0.324671253	0.324671253	0.324671253	0.324671253	0.324671253	0.324671253	0.324671253	0.324671253	0.324671253	0.324671253	0.324671253	0.324671253	0.324671253	0.324671253	0.324671253	0.324671253	0.324671253	0.324671253	0.324671253	0.324671253	0.324671253	0.324671253	0.324671253	0.324671253	0.324671253	0.324671253	0.324671253	0.324671253	0.324671253	0.324671253	0.324671253	0.324671253	0.324671253	0.324671253	0.324671253	0.324671253	0.324671253
134	0.324640812	0.324640812	0.324640812	0.324640812	0.324640812	0.324640812	0.324640812	0.324640812	0.324640812	0.324640812	0.324640812	0.324640812	0.324640812	0.324640812	0.324640812	0.324640812	0.324640812	0.324640812	0.324640812	0.324640812	0.324640812	0.324640812	0.324640812	0.324640812	0.324640812	0.324640812	0.324640812	0.324640812	0.324640812	0.324640812	0.324640812	0.324640812	0.324640812	0.324640812	0.324640812	0.324640812	0.324640812	0.324640812	0.324640812	0.324640812	0.324640812	0.324640812	0.324640812	0.324640812	0.324640812	0.324640812	0.324640812	0.324640812	0.324640812
135	0.324612278	0.324612278	0.324612278	0.324612278	0.324612278	0.324612278	0.324612278	0.324612278	0.324612278	0.324612278	0.324612278	0.324612278	0.324612278	0.324612278	0.324612278	0.324612278	0.324612278	0.324612278	0.324612278	0.324612278	0.324612278	0.324612278	0.324612278	0.324612278	0.324612278	0.324612278	0.324612278	0.324612278	0.324612278	0.324612278	0.324612278	0.324612278	0.324612278	0.324612278	0.324612278	0.324612278	0.324612278	0.324612278	0.324612278	0.324612278	0.324612278	0.324612278	0.324612278	0.324612278	0.324612278	0.324612278	0.324612278	0.324612278	0.324612278
136	0.324586021	0.324586021	0.324586021	0.324586021	0.324586021	0.324586021	0.324586021	0.324586021	0.324586021	0.324586021	0.324586021	0.324586021	0.324586021	0.324586021	0.324586021	0.324586021	0.324586021	0.324586021	0.324586021	0.324586021	0.324586021	0.324586021	0.324586021	0.324586021	0.324586021	0.324586021	0.324586021	0.324586021	0.324586021	0.324586021	0.324586021	0.324586021	0.324586021	0.324586021	0.324586021	0.324586021	0.324586021	0.324586021	0.324586021	0.324586021	0.324586021	0.324586021	0.324586021	0.324586021	0.324586021	0.324586021	0.324586021	0.324586021	0.324586021
137	0.324562399	0.324562399	0.324562399	0.324562399	0.324562399	0.324562399	0.324562399	0.324562399	0.324562399	0.324562399	0.324562399	0.324562399	0.324562399	0.324562399	0.324562399	0.324562399	0.324562399	0.324562399	0.324562399	0.324562399	0.324562399	0.324562399	0.324562399	0.324562399	0.324562399	0.324562399	0.324562399	0.324562399	0.324562399	0.324562399	0.324562399	0.324562399	0.324562399	0.324562399	0.324562399	0.324562399	0.324562399	0.324562399	0.324562399	0.324562399	0.324562399	0.324562399	0.324562399	0.324562399	0.324562399	0.324562399	0.324562399	0.324562399	0.324562399
138	0.324541758	0.324541758	0.324541758	0.324541758	0.324541758	0.324541758	0.324541758	0.324541758	0.324541758	0.324541758	0.324541758	0.324541758	0.324541758	0.324541758	0.324541758	0.324541758	0.324541758	0.324541758	0.324541758	0.324541758	0.324541758	0.324541758	0.324541758	0.324541758	0.324541758	0.324541758	0.324541758	0.324541758	0.324541758	0.324541758	0.324541758	0.324541758	0.324541758	0.324541758	0.324541758	0.324541758	0.324541758	0.324541758	0.324541758	0.324541758	0.324541758	0.324541758	0.324541758	0.324541758	0.324541758	0.324541758	0.324541758	0.324541758	0.324541758
139	0.324523239	0.324523239	0.324523239	0.324523239	0.324523239	0.324523239	0.324523239	0.324523239	0.324523239	0.324523239	0.324523239	0.324523239	0.324523239	0.324523239	0.324523239	0.324523239	0.324523239	0.324523239	0.324523239	0.324523239	0.324523239	0.324523239	0.324523239	0.324523239	0.324523239	0.324523239	0.324523239	0.324523239	0.324523239	0.324523239	0.324523239	0.324523239	0.324523239	0.324523239	0.324523239	0.324523239	0.324523239	0.324523239	0.324523239	0.324523239	0.324523239	0.324523239	0.324523239	0.324523239	0.324523239	0.324523239	0.324523239	0.324523239	0.324523239
140	0.324505417	0.324505417	0.324505417	0.324505417	0.324505417	0.324505417	0.324505417	0.324505417	0.324505417	0.324505417	0.324505417	0.324505417	0.324505417	0.324505417	0.324505417	0.324505417	0.324505417	0.324505417	0.324505417	0.324505417	0.324505417	0.324505417	0.324505417	0.324505417	0.324505417	0.324505417	0.324505417	0.324505417	0.324505417	0.324505417	0.324505417	0.324505417	0.324505417	0.324505417	0.324505417	0.324505417	0.324505417	0.324505417	0.324505417	0.324505417	0.324505417	0.324505417	0.324505417	0.324505417	0.324505417	0.324505417	0.324505417	0.324505417	0.324505417
141	0.324489784	0.324489784	0.324489784	0.324489784	0.324489784	0.324489784	0.324489784	0.324489784	0.324489784	0.324489784	0.324489784	0.324489784	0.324489784	0.324489784	0.324489784	0.324489784	0.324489784	0.324489784	0.324489784	0.324489784	0.324489784	0.324489784	0.324489784	0.324489784	0.324489784	0.324489784	0.324489784	0.324489784	0.324489784	0.324489784	0.324489784	0.324489784	0.324489784	0.324489784	0.324489784	0.324489784	0.324489784	0.324489784	0.324489784	0.324489784	0.324489784	0.324489784	0.324489784	0.324489784	0.324489784	0.324489784	0.324489784	0.324489784	0.324489784
142	0.32447631	0.32447631	0.32447631	0.32447631	0.32447631	0.32447631	0.32447631	0.32447631	0.32447631	0.32447631	0.32447631	0.32447631	0.32447631	0.32447631	0.32447631	0.32447631	0.32447631	0.32447631	0.32447631	0.32447631	0.32447631	0.32447631	0.32447631	0.32447631	0.32447631	0.32447631	0.32447631	0.32447631	0.32447631	0.32447631	0.32447631	0.32447631	0.32447631	0.32447631	0.32447631	0.32447631	0.32447631	0.32447631	0.32447631	0.32447631	0.32447631	0.32447631	0.32447631	0.32447631	0.32447631	0.32447631	0.32447631	0.32447631	0.32447631
143	0.324464927	0.324464927	0.324464927	0.324464927	0.324464927	0.324464927	0.324464927	0.324464927	0.324464927	0.324464927	0.324464927	0.324464927	0.324464927	0.324464927	0.324464927	0.324464927	0.324464927	0.324464927	0.324464927	0.324464927	0.324464927	0.324464927	0.324464927	0.324464927	0.324464927	0.324464927	0.324464927	0.324464927	0.324464927	0.324464927	0.324464927	0.324464927	0.324464927	0.324464927	0.324464927	0.324464927	0.324464927	0.324464927	0.324464927	0.324464927	0.324464927	0.324464927	0.324464927	0.324464927	0.324464927	0.324464927	0.324464927	0.324464927	0.324464927
144	0.324455532	0.324455532	0.324455532	0.324455532	0.324455532	0.324455532	0.324455532	0.324455532	0.324455532	0.324455532	0.324455532	0.324455532	0.324455532	0.324455532	0.324455532	0.324455532	0.324455532	0.324455532	0.324455532	0.324455532	0.324455532	0.324455532	0.324455532	0.324455532	0.324455532	0.324455532	0.324455532	0.324455532	0.324455532	0.324455532	0.324455532	0.324455532	0.324455532	0.324455532	0.324455532	0.324455532	0.324455532	0.324455532	0.324455532	0.324455532	0.324455532	0.324455532	0.324455532	0.324455532	0.324455532	0.324455532	0.324455532	0.324455532	0.324455532
145	0.324447987	0.324447987	0.324447987	0.324447987	0.324447987	0.324447987	0.324447987	0.324447987	0.324447987	0.324447987	0.324447987	0.324447987	0.324447987	0.324447987	0.324447987	0.324447987	0.324447987	0.324447987	0.324447987	0.324447987	0.324447987	0.324447987	0.324447987	0.324447987	0.324447987	0.324447987	0.324447987	0.324447987	0.324447987	0.324447987	0.324447987	0.324447987	0.324447987	0.324447987	0.324447987	0.324447987	0.324447987	0.324447987	0.324447987	0.324447987	0.324447987	0.324447987	0.324447987	0.324447987	0.324447987	0.324447987	0.324447987	0.324447987	0.324447987
146	0.324442117	0.324442117	0.324442117	0.324442117	0.324442117	0.324442117	0.324442117	0.324442117	0.324442117	0.324442117	0.324442117	0.324442117	0.324442117	0.324442117	0.324442117	0.324442117	0.324442117	0.324442117	0.324442117	0.324442117	0.324442117	0.324442117	0.324442117	0.324442117	0.324442117	0.324442117	0.324442117	0.324442117	0.324442117	0.324442117	0.324442117	0.324442117	0.324442117	0.324442117	0.324442117	0.324442117	0.324442117	0.324442117	0.324442117	0.324442117	0.324442117	0.324442117	0.324442117	0.324442117	0.324442117	0.324442117	0.324442117	0.324442117	0.324442117
147	0.324438701	0.324438701	0.324438701	0.324438701	0.324438701	0.324438701	0.324438701	0.324438701	0.324438701	0.324438701	0.324438701	0.324438701	0.324438701	0.324438701	0.324438701	0.324438701	0.324438701	0.324438701	0.324438701	0.324438701	0.324438701	0.324438701	0.324438701	0.324438701	0.324438701	0.324438701	0.324438701	0.324438701	0.324438701	0.324438701	0.324438701	0.324438701	0.324438701	0.324438701	0.324438701	0.324438701	0.324438701	0.324438701	0.324438701	0.324438701	0.324438701	0.324438701	0.324438701	0.324438701	0.324438701	0.324438701	0.324438701	0.324438701	0.324438701
148	0.324437421	0.324437421	0.324437421	0.324437421	0.324437421	0.324437421	0.324437421	0.324437421	0.324437421	0.324437421	0.324437421	0.324437421	0.324437421	0.324437421	0.324437421	0.324437421	0.324437421	0.324437421	0.324437421	0.324437421	0.324437421	0.324437421	0.324437421	0.324437421	0.324437421	0.324437421	0.324437421	0.324437421	0.324437421	0.324437421	0.324437421	0.324437421	0.324437421	0.324437421	0.324437421	0.324437421	0.324437421	0.324437421	0.324437421	0.324437421	0.324437421	0.324437421	0.324437421	0.324437421	0.324437421	0.324437421	0.324437421	0.324437421	0.324437421
149	0.324437703	0.324437703	0.324437703	0.324437703	0.324437703	0.324437703	0.324437703	0.324437703	0.324437703	0.324437703	0.324437703	0.324437703	0.324437703	0.324437703	0.324437703	0.324437703	0.324437703	0.324437703	0.324437703	0.324437703	0.324437703	0.324437703	0.324437703	0.324437703	0.324437703	0.324437703	0.324437703	0.324437703	0.324437703	0.324437703	0.324437703	0.324437703	0.324437703	0.324437703	0.324437703	0.324437703	0.324437703	0.324437703	0.324437703	0.324437703	0.324437703	0.324437703	0.324437703	0.324437703	0.324437703	0.324437703	0.324437703	0.324437703	0.324437703
150	0.324439324	0.324439324	0.324439324	0.324439324	0.324439324	0.324439324	0.324439324	0.324439324	0.324439324	0.324439324	0.324439324	0.324439324	0.324439324	0.324439324	0.324439324	0.324439324	0.324439324	0.324439324	0.324439324	0.324439324	0.324439324	0.324439324	0.324439324	0.324439324	0.324439324	0.324439324	0.324439324	0.324439324	0.324439324	0.324439324	0.324439324	0.324439324	0.324439324	0.324439324	0.324439324	0.324439324	0.324439324	0.324439324	0.324439324	0.324439324	0.324439324	0.324439324	0.324439324	0.324439324	0.324439324	0.324439324	0.324439324	0.324439324	0.324439324
151	0.324442027	0.324442027	0.324442027	0.324442027	0.324442027	0.324442027	0.324442027	0.324442027	0.324442027	0.324442027	0.324442027	0.324442027	0.324442027	0.324442027	0.324442027	0.324442027	0.324442027	0.324442027	0.324442027	0.324442027	0.324442027	0.324442027	0.324442027	0.324442027	0.324442027	0.324442027	0.324442027	0.324442027	0.324442027	0.324442027	0.324442027	0.324442027	0.324442027	0.324442027	0.324442027	0.324442027	0.324442027	0.324442027	0.324442027	0.324442027	0.324442027	0.324442027	0.324442027	0.324442027	0.324442027	0.324442027	0.324442027	0.324442027	0.324442027
152	0.324445527	0.324445527	0.324445527	0.324445527	0.324445527	0.324445527	0.324445527	0.324445527	0.324445527	0.324445527	0.324445527	0.324445527	0.324445527	0.324445527	0.324445527	0.324445527	0.324445527	0.324445527	0.324445527	0.324445527	0.324445527	0.324445527	0.324445527	0.324445527	0.324445527	0.324445527	0.324445527	0.324445527	0.324445527	0.324445527	0.324445527	0.324445527	0.324445527	0.324445527	0.324445527	0.324445527	0.324445527	0.324445527	0.324445527	0.324445527	0.324445527	0.324445527	0.324445527	0.324445527	0.324445527	0.324445527	0.324445527	0.324445527	0.324445527
153	0.324449507	0.324449507	0.324449507	0.324449507	0.324449507	0.324449507	0.324449507	0.324449507	0.324449507	0.324449507	0.324449507	0.324449507	0.324449507	0.324449507	0.324449507	0.324449507	0.324449507	0.324449507	0.324449507	0.324449507	0.324449507	0.324449507	0.324449507	0.324449507	0.324449507	0.324449507	0.324449507	0.324449507	0.324449507	0.324449507	0.324449507	0.324449507	0.324449507	0.324449507	0.324449507	0.324449507	0.324449507	0.324449507	0.324449507	0.324449507	0.324449507	0.324449507	0.324449507	0.324449507	0.324449507	0.324449507	0.324449507	0.324449507	0.324449507
154	0.32445362	0.32445362	0.32445362	0.32445362	0.32445362	0.32445362	0.32445362	0.32445362	0.32445362	0.32445362	0.32445362	0.32445362	0.32445362	0.32445362	0.32445362	0.32445362	0.32445362	0.32445362	0.32445362	0.32445362	0.32445362	0.32445362	0.32445362	0.32445362	0.32445362	0.32445362	0.32445362	0.32445362	0.32445362	0.32445362	0.32445362	0.32445362	0.32445362	0.32445362	0.32445362	0.32445362	0.32445362	0.32445362	0.32445362	0.32445362	0.32445362	0.32445362	0.32445362	0.32445362	0.32445362	0.32445362	0.32445362	0.32445362	0.32445362
155	0.324457489	0.324457489	0.324457489	0.324457489	0.324457489	0.324457489	0.324457489	0.324457489	0.324457489	0.324457489	0.324457489	0.324457489	0.324457489	0.324457489	0.324457489	0.324457489	0.324457489	0.324457489	0.324457489	0.324457489	0.324457489	0.324457489	0.324457489	0.324457489	0.324457489	0.324457489	0.324457489	0.324457489	0.324457489	0.324457489	0.324457489	0.324457489	0.324457489	0.324457489	0.324457489	0.324457489	0.324457489	0.324457489	0.324457489	0.324457489	0.324457489	0.324457489	0.324457489	0.324457489	0.324457489	0.324457489	0.324457489	0.324457489	0.324457489
156	0.324460853	0.324460853	0.324460853	0.324460853	0.324460853	0.324460853	0.324460853	0.324460853	0.324460853	0.324460853	0.324460853	0.324460853	0.324460853	0.324460853	0.324460853	0.324460853	0.324460853	0.324460853	0.324460853	0.324460853	0.324460853	0.324460853	0.324460853	0.324460853	0.324460853	0.324460853	0.324460853	0.324460853	0.324460853	0.324460853	0.324460853	0.324460853	0.324460853	0.324460853	0.324460853	0.324460853	0.324460853	0.324460853	0.324460853	0.324460853	0.324460853	0.324460853	0.324460853	0.324460853	0.324460853	0.324460853	0.324460853	0.324460853	0.324460853
157	0.324467955	0.324467955	0.324467955	0.324467955	0.324467955	0.324467955	0.324467955	0.324467955	0.324467955	0.324467955	0.324467955	0.324467955	0.324467955	0.324467955	0.324467955	0.324467955	0.324467955	0.324467955	0.324467955	0.324467955	0.324467955	0.324467955	0.324467955	0.324467955	0.324467955	0.324467955	0.324467955	0.324467955	0.324467955	0.324467955	0.324467955	0.324467955	0.324467955	0.324467955	0.324467955	0.324467955	0.324467955	0.324467955	0.324467955	0.324467955	0.324467955	0.324467955	0.324467955	0.324467955	0.324467955	0.324467955	0.324467955	0.324467955	0.324467955
158	0.324475337	0.324475337	0.324475337	0.324475337	0.324475337	0.324475337	0.324475337	0.324475337	0.324475337	0.324475337	0.324475337	0.324475337	0.324475337	0.324475337	0.324475337	0.324475337	0.324475337	0.324475337	0.324475337	0.324475337	0.324475337	0.324475337	0.324475337	0.324475337	0.324475337	0.324475337	0.324475337	0.324475337	0.324475337	0.324475337	0.324475337	0.324475337	0.324475337	0.324475337	0.324475337	0.324475337	0.324475337	0.324475337	0.324475337	0.324475337	0.324475337	0.324475337	0.324475337	0.324475337	0.324475337	0.324475337	0.324475337	0.324475337	0.324475337
159	0.324482792	0.324482792	0.324482792	0.324482792	0.324482792	0.324482792	0.324482792	0.324482792	0.324482792	0.324482792	0.324482792	0.324482792	0.324482792	0.324482792	0.324482792	0.324482792	0.324482792	0.324482792	0.324482792	0.324482792	0.324482792	0.324482792	0.324482792	0.324482792	0.324482792	0.324482792	0.324482792	0.324482792	0.324482792	0.324482792	0.324482792	0.324482792	0.324482792	0.324482792	0.324482792	0.324482792	0.324482792	0.324482792	0.324482792	0.324482792	0.324482792	0.324482792	0.324482792	0.324482792	0.324482792	0.324482792	0.324482792	0.324482792	0.324482792
160	0.3244901	0.3244901	0.3244901	0.3244901	0.3244901	0.3244901	0.3244901	0.3244901	0.3244901	0.3244901	0.3244901	0.3244901	0.3244901	0.3244901	0.3244901	0.3244901	0.3244901	0.3244901	0.3244901	0.3244901	0.3244901	0.3244901	0.3244901	0.3244901	0.3244901	0.3244901	0.3244901	0.3244901	0.3244901	0.3244901	0.3244901	0.3244901	0.3244901	0.3244901	0.3244901	0.3244901	0.3244901	0.3244901	0.3244901	0.3244901	0.3244901	0.3244901	0.3244901	0.3244901	0.3244901	0.3244901	0.3244901	0.3244901	0.3244901
161	0.32449703	0.32449703	0.32449703	0.32449703	0.32449703	0.32449703	0.32449703	0.32449703	0.32449703	0.32449703	0.32449703	0.32449703	0.32449703	0.32449703	0.32449703	0.32449703	0.32449703	0.32449703	0.32449703	0.32449703	0.32449703	0.32449703	0.32449703	0.32449703	0.32449703	0.32449703	0.32449703	0.32449703	0.32449703	0.32449703	0.32449703	0.32449703	0.32449703	0.32449703	0.32449703	0.32449703	0.32449703	0.32449703	0.32449703	0.32449703	0.32449703	0.32449703	0.32449703	0.32449703	0.32449703	0.32449703	0.32449703	0.32449703	0.32449703
162	0.324503337	0.324503337	0.324503337	0.324503337	0.324503337	0.324503337	0.324503337	0.324503337	0.324503337	0.324503337	0.324503337	0.324503337	0.324503337	0.324503337	0.324503337	0.324503337	0.324503337	0.324503337	0.324503337	0.324503337	0.324503337	0.324503337	0.324503337	0.324503337	0.324503337	0.324503337	0.324503337	0.324503337	0.324503337	0.324503337	0.324503337	0.324503337	0.324503337	0.324503337	0.324503337	0.324503337	0.324503337	0.324503337	0.324503337	0.324503337	0.324503337	0.324503337	0.324503337	0.324503337	0.324503337	0.324503337	0.324503337	0.324503337	0.324503337
163	0.324508765	0.324508765	0.324508765	0.324508765	0.324508765	0.324508765	0.324508765	0.324508765	0.324508765	0.324508765	0.324508765	0.324508765	0.324508765	0.324508765	0.324508765	0.324508765	0.324508765	0.324508765	0.324508765	0.324508765	0.324508765	0.324508765	0.324508765	0.324508765	0.324508765	0.324508765	0.324508765	0.324508765	0.324508765	0.324508765	0.324508765	0.324508765	0.324508765	0.324508765	0.324508765	0.324508765	0.324508765	0.324508765	0.324508765	0.324508765	0.324508765	0.324508765	0.324508765	0.324508765	0.324508765	0.324508765	0.324508765	0.324508765	0.324508765
164	0.324513045	0.324513045	0.324513045	0.324513045	0.324513045	0.324513045	0.324513045	0.324513045	0.324513045	0.324513045	0.324513045	0.324513045	0.324513045	0.324513045	0.324513045	0.324513045	0.324513045	0.324513045	0.324513045	0.324513045	0.324513045	0.324513045	0.324513045	0.324513045	0.324513045	0.324513045	0.324513045	0.324513045	0.324513045	0.324513045	0.324513045	0.324513045	0.324513045	0.324513045	0.324513045	0.324513045	0.324513045	0.324513045	0.324513045	0.324513045	0.324513045	0.324513045	0.324513045	0.324513045	0.324513045	0.324513045	0.324513045	0.324513045	0.324513045
165	0.324515897	0.324515897	0.324515897	0.324515897	0.324515897	0.324515897	0.324515897	0.324515897	0.324515897	0.324515897	0.324515897	0.324515897	0.324515897	0.324515897	0.324515897	0.324515897	0.324515897	0.324515897	0.324515897	0.324515897	0.324515897	0.324515897	0.324515897	0.324515897	0.324515897	0.324515897	0.324515897	0.324515897	0.324515897	0.324515897	0.324515897	0.324515897	0.324515897	0.324515897	0.324515897	0.324515897	0.324515897	0.324515897	0.324515897	0.324515897	0.324515897	0.324515897	0.324515897	0.324515897	0.324515897	0.324515897	0.324515897	0.324515897	0.324515897
166	0.324518561	0.324518561	0.324518561	0.324518561	0.324518561	0.324518561	0.324518561	0.324518561	0.324518561	0.324518561	0.324518561	0.324518561	0.324518561	0.324518561	0.324518561	0.324518561	0.324518561	0.324518561	0.324518561	0.324518561	0.324518561	0.324518561	0.324518561	0.324518561	0.324518561	0.324518561	0.324518561	0.324518561	0.324518561	0.324518561	0.324518561	0.324518561	0.324518561	0.324518561	0.324518561	0.324518561	0.324518561	0.324518561	0.324518561	0.324518561	0.324518561	0.324518561	0.324518561	0.324518561	0.324518561	0.324518561	0.324518561	0.324518561	0.324518561
167	0.324522718	0.324522718	0.324522718	0.324522718	0.324522718	0.324522718	0.324522718	0.324522718	0.324522718	0.324522718	0.324522718	0.324522718	0.324522718	0.324522718	0.324522718	0.324522718	0.324522718	0.324522718	0.324522718	0.324522718	0.324522718	0.324522718	0.324522718	0.324522718	0.324522718	0.324522718	0.324522718	0.324522718	0.324522718	0.324522718	0.324522718	0.324522718	0.324522718	0.324522718	0.324522718	0.324522718	0.324522718	0.324522718	0.324522718	0.324522718	0.324522718	0.324522718	0.324522718	0.324522718	0.324522718	0.324522718	0.324522718	0.324522718	0.324522718
168	0.324526284	0.324526284	0.324526284	0.324526284	0.324526284	0.324526284	0.324526284	0.324526284	0.324526284	0.324526284	0.324526284	0.324526284	0.324526284	0.324526284	0.324526284	0.324526284	0.324526284	0.324526284	0.324526284	0.324526284	0.324526284	0.324526284	0.324526284	0.324526284	0.324526284	0.324526284	0.324526284	0.324526284	0.324526284	0.324526284	0.324526284	0.324526284	0.324526284	0.324526284	0.324526284	0.324526284	0.324526284	0.324526284	0.324526284	0.324526284	0.324526284	0.324526284	0.324526284	0.324526284	0.324526284	0.324526284	0.324526284	0.324526284	0.324526284
169	0.324529201	0.324529201	0.324529201	0.324529201	0.324529201	0.324529201	0.324529201	0.324529201	0.324529201	0.324529201	0.324529201	0.324529201	0.324529201	0.324529201	0.324529201	0.324529201	0.324529201	0.324529201	0.324529201	0.324529201	0.324529201	0.324529201	0.324529201	0.324529201	0.324529201	0.324529201	0.324529201	0.324529201	0.324529201	0.324529201	0.324529201	0.324529201	0.324529201	0.324529201	0.324529201	0.324529201	0.324529201	0.324529201	0.324529201	0.324529201	0.324529201	0.324529201	0.324529201	0.324529201	0.324529201	0.324529201	0.324529201	0.324529201	0.324529201
170	0.324531411	0.324531411	0.324531411	0.324531411	0.324531411	0.324531411	0.324531411	0.324531411	0.324531411	0.324531411	0.324531411	0.324531411	0.324531411	0.324531411	0.324531411	0.324531411	0.324531411	0.324531411	0.324531411	0.324531411	0.324531411	0.324531411	0.324531411	0.324531411	0.324531411	0.324531411	0.324531411	0.324531411	0.324531411	0.324531411	0.324531411	0.324531411	0.324531411	0.324531411	0.324531411	0.324531411	0.324531411	0.324531411	0.324531411	0.324531411	0.324531411	0.324531411	0.324531411	0.324531411	0.324531411	0.324531411	0.324531411	0.324531411	0.324531411
171	0.324532864	0.324532864	0.324532864	0.324532864	0.324532864	0.324532864	0.324532864	0.324532864	0.324532864	0.324532864	0.324532864	0.324532864	0.324532864	0.324532864	0.324532864	0.324532864	0.324532864	0.324532864	0.324532864	0.324532864	0.324532864	0.324532864	0.324532864	0.324532864	0.324532864	0.324532864	0.324532864	0.324532864	0.324532864	0.324532864	0.324532864	0.324532864	0.324532864	0.324532864	0.324532864	0.324532864	0.324532864	0.324532864	0.324532864	0.324532864	0.324532864	0.324532864	0.324532864	0.324532864	0.324532864	0.324532864	0.324532864	0.324532864	0.324532864
172	0.324533512	0.324533512	0.324533512	0.324533512	0.324533512	0.324533512	0.324533512	0.324533512	0.324533512	0.324533512	0.324533512	0.324533512	0.324533512	0.324533512	0.324533512	0.324533512	0.324533512	0.324533512	0.324533512	0.324533512	0.324533512	0.324533512	0.324533512	0.324533512	0.324533512	0.324533512	0.324533512	0.324533512	0.324533512	0.324533512	0.324533512	0.324533512	0.324533512	0.324533512	0.324533512	0.324533512	0.324533512	0.324533512	0.324533512	0.324533512	0.324533512	0.324533512	0.324533512	0.324533512	0.324533512	0.324533512	0.324533512	0.324533512	0.324533512
173	0.324533311	0.324533311	0.324533311	0.324533311	0.324533311	0.324533311	0.324533311	0.324533311	0.324533311	0.324533311	0.324533311	0.324533311	0.324533311	0.324533311	0.324533311	0.324533311	0.324533311	0.324533311	0.324533311	0.324533311	0.324533311	0.324533311	0.324533311	0.324533311	0.324533311	0.324533311	0.324533311	0.324533311	0.324533311	0.324533311	0.324533311	0.324533311	0.324533311	0.324533311	0.324533311	0.324533311	0.324533311	0.324533311	0.324533311	0.324533311	0.324533311	0.324533311	0.324533311	0.324533311	0.324533311	0.324533311	0.324533311	0.324533311	0.324533311
174	0.324532223	0.324532223	0.324532223	0.324532223	0.324532223	0.324532223	0.324532223	0.324532223	0.324532223	0.324532223	0.324532223	0.324532223	0.324532223	0.324532223	0.324532223	0.324532223	0.324532223	0.324532223	0.324532223	0.324532223	0.324532223	0.324532223	0.324532223	0.324532223	0.324532223	0.324532223	0.324532223	0.324532223	0.324532223	0.324532223	0.324532223	0.324532223	0.324532223	0.324532223	0.324532223	0.324532223	0.324532223	0.324532223	0.324532223	0.324532223	0.324532223	0.324532223	0.324532223	0.324532223	0.324532223	0.324532223	0.324532223	0.324532223	0.324532223
175	0.324530214	0.324530214	0.324530214	0.324530214	0.324530214	0.324530214	0.324530214	0.324530214	0.324530214	0.324530214	0.324530214	0.324530214	0.324530214	0.324530214	0.324530214	0.324530214	0.324530214	0.324530214	0.324530214	0.324530214	0.324530214	0.324530214	0.324530214	0.324530214	0.324530214	0.324530214	0.324530214	0.324530214	0.324530214	0.324530214	0.324530214	0.324530214	0.324530214	0.324530214	0.324530214	0.324530214	0.324530214	0.324530214	0.324530214	0.324530214	0.324530214	0.324530214	0.324530214	0.324530214	0.324530214	0.324530214	0.324530214	0.324530214	0.324530214
176	0.324528305	0.324528305	0.324528305	0.324528305	0.324528305	0.324528305	0.324528305	0.324528305	0.324528305	0.324528305	0.324528305	0.324528305	0.324528305	0.324528305	0.324528305	0.324528305	0.324528305	0.324528305	0.324528305	0.324528305	0.324528305	0.324528305	0.324528305	0.324528305	0.324528305	0.324528305	0.324528305	0.324528305	0.324528305	0.324528305	0.324528305	0.324528305	0.324528305	0.324528305	0.324528305	0.324528305	0.324528305	0.324528305	0.324528305	0.324528305	0.324528305	0.324528305	0.324528305	0.324528305	0.324528305	0.324528305	0.324528305	0.324528305	0.324528305
177	0.32452627	0.32452627	0.32452627	0.32452627	0.32452627	0.32452627	0.32452627	0.32452627	0.32452627	0.32452627	0.32452627	0.32452627	0.32452627	0.32452627	0.32452627	0.32452627	0.32452627	0.32452627	0.32452627	0.32452627	0.32452627	0.32452627	0.32452627	0.32452627	0.32452627	0.32452627	0.32452627	0.32452627	0.32452627	0.32452627	0.32452627	0.32452627	0.32452627	0.32452627	0.32452627	0.32452627	0.32452627	0.32452627	0.32452627	0.32452627	0.32452627	0.32452627	0.32452627	0.32452627	0.32452627	0.32452627	0.32452627	0.32452627	0.32452627
178	0.324523859	0.324523859	0.324523859	0.324523859	0.324523859	0.324523859	0.324523859	0.324523859	0.324523859	0.324523859	0.324523859	0.324523859	0.324523859	0.324523859	0.324523859	0.324523859	0.324523859	0.324523859	0.324523859	0.324523859	0.324523859	0.324523859	0.324523859	0.324523859	0.324523859	0.324523859	0.324523859	0.324523859	0.324523859	0.324523859	0.324523859	0.324523859	0.324523859	0.324523859	0.324523859	0.324523859	0.324523859	0.324523859	0.324523859	0.324523859	0.324523859	0.324523859	0.324523859	0.324523859	0.324523859	0.324523859	0.324523859	0.324523859	0.324523859
179	0.324521148	0.324521148	0.324521148	0.324521148	0.324521148	0.324521148	0.324521148	0.324521148	0.324521148	0.324521148	0.324521148	0.324521148	0.324521148	0.324521148	0.324521148	0.324521148	0.324521148	0.324521148	0.324521148	0.324521148	0.324521148	0.324521148	0.324521148	0.324521148	0.324521148	0.324521148	0.324521148	0.324521148	0.324521148	0.324521148	0.324521148	0.324521148	0.324521148	0.324521148	0.324521148	0.324521148	0.324521148	0.324521148	0.324521148	0.324521148	0.324521148	0.324521148	0.324521148	0.324521148	0.324521148	0.324521148	0.324521148	0.324521148	0.324521148
180	0.324518221	0.324518221	0.324518221	0.324518221	0.324518221	0.324518221	0.324518221	0.324518221	0.324518221	0.324518221	0.324518221	0.324518221	0.324518221	0.324518221	0.324518221	0.324518221	0.324518221	0.324518221	0.324518221	0.324518221	0.324518221	0.324518221	0.324518221	0.324518221	0.324518221	0.324518221	0.324518221	0.324518221	0.324518221	0.324518221	0.324518221	0.324518221	0.324518221	0.324518221	0.324518221	0.324518221	0.324518221	0.324518221	0.324518221	0.324518221	0.324518221	0.324518221	0.324518221	0.324518221	0.324518221	0.324518221	0.324518221	0.324518221	0.324518221
181	0.324515174	0.324515174	0.324515174	0.324515174	0.324515174	0.324515174	0.324515174	0.324515174	0.324515174	0.324515174	0.324515174	0.324515174	0.324515174	0.324515174	0.324515174	0.324515174	0.324515174	0.324515174	0.324515174	0.324515174	0.324515174	0.324515174	0.324515174	0.324515174	0.324515174	0.324515174	0.324515174	0.324515174	0.324515174	0.324515174	0.324515174	0.324515174	0.324515174	0.324515174	0.324515174	0.324515174	0.324515174	0.324515174	0.324515174	0.324515174	0.324515174	0.324515174	0.324515174	0.324515174	0.324515174	0.324515174	0.324515174	0.324515174	0.324515174
182	0.324512111	0.324512111	0.324512111	0.324512111	0.324512111	0.324512111	0.324512111	0.324512111	0.324512111	0.324512111	0.324512111	0.324512111	0.324512111	0.324512111	0.324512111	0.324512111	0.324512111	0.324512111	0.324512111	0.324512111	0.324512111	0.324512111	0.324512111	0.324512111	0.324512111	0.324512111	0.324512111	0.324512111	0.324512111	0.324512111	0.324512111	0.324512111	0.324512111	0.324512111	0.324512111	0.324512111	0.324512111	0.324512111	0.324512111	0.324512111	0.324512111	0.324512111	0.324512111	0.324512111	0.324512111	0.324512111	0.324512111	0.324512111	0.324512111
183	0.324509148	0.324509148	0.324509148	0.324509148	0.324509148	0.324509148	0.324509148	0.324509148	0.324509148	0.324509148	0.324509148	0.324509148	0.324509148	0.324509148	0.324509148	0.324509148	0.324509148	0.324509148	0.324509148	0.324509148	0.324509148	0.324509148	0.324509148	0.324509148	0.324509148	0.324509148	0.324509148	0.324509148	0.324509148	0.324509148	0.324509148	0.324509148	0.324509148	0.324509148	0.324509148	0.324509148	0.324509148	0.324509148	0.324509148	0.324509148	0.324509148	0.324509148	0.324509148	0.324509148	0.324509148	0.324509148	0.324509148	0.324509148	0.324509148
184	0.324506409	0.324506409	0.324506409	0.324506409	0.324506409	0.324506409	0.324506409	0.324506409	0.324506409	0.324506409	0.324506409	0.324506409	0.324506409	0.324506409	0.324506409	0.324506409	0.324506409	0.324506409	0.324506409	0.324506409	0.324506409	0.324506409	0.324506409	0.324506409	0.324506409	0.324506409	0.324506409	0.324506409	0.324506409	0.324506409	0.324506409	0.324506409	0.324506409	0.324506409	0.324506409	0.324506409	0.324506409	0.324506409	0.324506409	0.324506409	0.324506409	0.324506409	0.324506409	0.324506409	0.324506409	0.324506409	0.324506409	0.324506409	0.324506409
185	0.32450393	0.32450393	0.32450393	0.32450393	0.32450393	0.32450393	0.32450393	0.32450393	0.32450393	0.32450393	0.32450393	0.32450393	0.32450393	0.32450393	0.32450393	0.32450393	0.32450393	0.32450393	0.32450393	0.32450393	0.32450393	0.32450393	0.32450393	0.32450393	0.32450393	0.32450393	0.32450393	0.32450393	0.32450393	0.32450393	0.32450393	0.32450393	0.32450393	0.32450393	0.32450393	0.32450393	0.32450393	0.32450393	0.32450393	0.32450393	0.32450393	0.32450393	0.32450393	0.32450393	0.32450393	0.32450393	0.32450393	0.32450393	0.32450393
186	0.324500647	0.324500647	0.324500647	0.324500647	0.324500647	0.324500647	0.324500647	0.324500647	0.324500647	0.324500647	0.324500647	0.324500647	0.324500647	0.324500647	0.324500647	0.324500647	0.324500647	0.324500647	0.324500647	0.324500647	0.324500647	0.324500647	0.324500647	0.324500647	0.324500647	0.324500647	0.324500647	0.324500647	0.324500647	0.324500647	0.324500647	0.324500647	0.324500647	0.324500647	0.324500647	0.324500647	0.324500647	0.324500647	0.324500647	0.324500647	0.324500647	0.324500647	0.324500647	0.324500647	0.324500647	0.324500647	0.324500647	0.324500647	0.324500647
187	0.324497506	0.324497506	0.324497506	0.324497506	0.324497506	0.324497506	0.324497506	0.324497506	0.324497506	0.324497506	0.324497506	0.324497506	0.324497506	0.324497506	0.324497506	0.324497506	0.324497506	0.324497506	0.324497506	0.324497506	0.324497506	0.324497506	0.324497506	0.324497506	0.324497506	0.324497506	0.324497506	0.324497506	0.324497506	0.324497506	0.324497506	0.324497506	0.324497506	0.324497506	0.324497506	0.324497506	0.324497506	0.324497506	0.324497506	0.324497506	0.324497506	0.324497506	0.324497506	0.324497506	0.324497506	0.324497506	0.324497506	0.324497506	0.324497506
188	0.32449459	0.32449459	0.32449459	0.32449459	0.32449459	0.32449459	0.32449459	0.32449459	0.32449459	0.32449459	0.32449459	0.32449459	0.32449459	0.32449459	0.32449459	0.32449459	0.32449459	0.32449459	0.32449459	0.32449459	0.32449459	0.32449459	0.32449459	0.32449459	0.32449459	0.32449459	0.32449459	0.32449459	0.32449459	0.32449459	0.32449459	0.32449459	0.32449459	0.32449459	0.32449459	0.32449459	0.32449459	0.32449459	0.32449459	0.32449459	0.32449459	0.32449459	0.32449459	0.32449459	0.32449459	0.32449459	0.32449459	0.32449459	0.32449459
189	0.324491985	0.324491985	0.324491985	0.324491985	0.324491985	0.324491985	0.324491985	0.324491985	0.324491985	0.324491985	0.324491985	0.324491985	0.324491985	0.324491985	0.324491985	0.324491985	0.324491985	0.324491985	0.324491985	0.324491985	0.324491985	0.324491985	0.324491985	0.324491985	0.324491985	0.324491985	0.324491985	0.324491985	0.324491985	0.324491985	0.324491985	0.324491985	0.324491985	0.324491985	0.324491985	0.324491985	0.324491985	0.324491985	0.324491985	0.324491985	0.324491985	0.324491985	0.324491985	0.324491985	0.324491985	0.324491985	0.324491985	0.324491985	0.324491985
190	0.324489785	0.324489785	0.324489785	0.324489785	0.324489785	0.324489785	0.324489785	0.324489785	0.324489785	0.324489785	0.324489785	0.324489785	0.324489785	0.324489785	0.324489785	0.324489785	0.324489785	0.324489785	0.324489785	0.324489785	0.324489785	0.324489785	0.324489785	0.324489785	0.324489785	0.324489785	0.324489785	0.324489785	0.324489785	0.324489785	0.324489785	0.324489785	0.324489785	0.324489785	0.324489785	0.324489785	0.324489785	0.324489785	0.324489785	0.324489785	0.324489785	0.324489785	0.324489785	0.324489785	0.324489785	0.324489785	0.324489785	0.324489785	0.324489785
191	0.324488085	0.324488085	0.324488085	0.324488085	0.324488085	0.324488085	0.324488085	0.324488085	0.324488085	0.324488085	0.324488085	0.324488085	0.324488085	0.324488085	0.324488085	0.324488085	0.324488085	0.324488085	0.324488085	0.324488085	0.324488085	0.324488085	0.324488085	0.324488085	0.324488085	0.324488085	0.324488085	0.324488085	0.324488085	0.324488085	0.324488085	0.324488085	0.324488085	0.324488085	0.324488085	0.324488085	0.324488085	0.324488085	0.324488085	0.324488085	0.324488085	0.324488085	0.324488085	0.324488085	0.324488085	0.324488085	0.324488085	0.324488085	0.324488085
192	0.324486988	0.324486988	0.324486988	0.324486988	0.324486988	0.324486988	0.324486988	0.324486988	0.324486988	0.324486988	0.324486988	0.324486988	0.324486988	0.324486988	0.324486988	0.324486988	0.324486988	0.324486988	0.324486988	0.324486988	0.324486988	0.324486988	0.324486988	0.324486988	0.324486988	0.324486988	0.324486988	0.324486988	0.324486988	0.324486988	0.324486988	0.324486988	0.324486988	0.324486988	0.324486988	0.324486988	0.324486988	0.324486988	0.324486988	0.324486988	0.324486988	0.324486988	0.324486988	0.324486988	0.324486988	0.324486988	0.324486988	0.324486988	0.324486988
193	0.3244866	0.3244866	0.3244866	0.3244866	0.3244866	0.3244866	0.3244866	0.3244866	0.3244866	0.3244866	0.3244866	0.3244866	0.3244866	0.3244866	0.3244866	0.3244866	0.3244866	0.3244866	0.3244866	0.3244866	0.3244866	0.3244866	0.3244866	0.3244866	0.3244866	0.3244866	0.3244866	0.3244866	0.3244866	0.3244866	0.3244866	0.3244866	0.3244866	0.3244866	0.3244866	0.3244866	0.3244866	0.3244866	0.3244866	0.3244866	0.3244866	0.3244866	0.3244866	0.3244866	0.3244866	0.3244866	0.3244866	0.3244866	0.3244866
194	0.324487032	0.324487032	0.324487032	0.324487032	0.324487032	0.324487032	0.324487032	0.324487032	0.324487032	0.324487032	0.324487032	0.324487032	0.324487032	0.324487032	0.324487032	0.324487032	0.324487032	0.324487032	0.324487032	0.324487032	0.324487032	0.324487032	0.324487032	0.324487032	0.324487032	0.324487032	0.324487032	0.324487032	0.324487032	0.324487032	0.324487032	0.324487032	0.324487032	0.324487032	0.324487032	0.324487032	0.324487032	0.324487032	0.324487032	0.324487032	0.324487032	0.324487032	0.324487032	0.324487032	0.324487032	0.324487032	0.324487032	0.324487032	0.324487032
195	0.324488198	0.324488198	0.324488198	0.324488198	0.324488198	0.324488198	0.324488198	0.324488198	0.324488198	0.324488198	0.324488198	0.324488198	0.324488198	0.324488198	0.324488198	0.324488198	0.324488198	0.324488198	0.324488198	0.324488198	0.324488198	0.324488198	0.324488198	0.324488198	0.324488198	0.324488198	0.324488198	0.324488198	0.324488198	0.324488198	0.324488198	0.324488198	0.324488198	0.324488198	0.324488198	0.324488198	0.324488198	0.324488198	0.324488198	0.324488198	0.324488198	0.324488198	0.324488198	0.324488198	0.324488198	0.324488198	0.324488198	0.324488198	0.324488198
196	0.324489707	0.324489707	0.324489708	0.324489708	0.324489708	0.324489708	0.324489708	0.324489708	0.324489708	0.324489707	0.324489708	0.324489708	0.324489708	0.324489708	0.324489708	0.324489708	0.324489708	0.324489707	0.324489708	0.324489708	0.324489708	0.324489708	0.324489708	0.324489708	0.324489708	0.324489707	0.324489708	0.324489708	0.324489708	0.324489708	0.324489708	0.324489708	0.324489707	0.324489707	0.324489708	0.324489708	0.324489708	0.324489708	0.324489708	0.324489708	0.324489708	0.324489707	0.324489708	0.324489708	0.324489708	0.324489708	0.324489708	0.324489708	0.324489708
197	0.324491511	0.324491511	0.324491511	0.324491511	0.324491511	0.324491511	0.324491511	0.324491511	0.324491511	0.324491511	0.324491511	0.324491511	0.324491511	0.324491511	0.324491511	0.324491511	0.324491511	0.324491511	0.324491511	0.324491511	0.324491511	0.324491511	0.324491511	0.324491511	0.324491511	0.324491511	0.324491511	0.324491511	0.324491511	0.324491511	0.324491511	0.324491511	0.324491511	0.324491511	0.324491511	0.324491511	0.324491511	0.324491511	0.324491511	0.324491511	0.324491511	0.324491511	0.324491511	0.324491511	0.324491511	0.324491511	0.324491511	0.324491511	0.324491511
198	0.324493389	0.324493389	0.324493389	0.324493389	0.324493389	0.324493389	0.324493389	0.324493389	0.324493389	0.324493389	0.324493389	0.324493389	0.324493389	0.324493389	0.324493389	0.324493389	0.324493389	0.324493389	0.324493389	0.324493389	0.324493389	0.324493389	0.324493389	0.324493389	0.324493389	0.324493389	0.324493389	0.324493389	0.324493389	0.324493389	0.324493389	0.324493389	0.324493389	0.324493389	0.324493389	0.324493389	0.324493389	0.324493389	0.324493389	0.324493389	0.324493389	0.324493389	0.324493389	0.324493389	0.324493389	0.324493389	0.324493389	0.324493389	0.324493389
199	0.324495234	0.324495234	0.324495234	0.324495234	0.324495234	0.324495234	0.324495234	0.324495234	0.324495234	0.324495234	0.324495234	0.324495234	0.324495234	0.324495234	0.324495234	0.324495234	0.324495234	0.324495234	0.324495234	0.324495234	0.324495234	0.324495234	0.324495234	0.324495234	0.324495234	0.324495234	0.324495234	0.324495234	0.324495234	0.324495234	0.324495234	0.324495234	0.324495234	0.324495234	0.324495234	0.324495234	0.324495234	0.324495234	0.324495234	0.324495234	0.324495234	0.324495234	0.324495234	0.324495234	0.324495234	0.324495234	0.324495234	0.324495234	0.324495234
200	0.324497129	0.324497129	0.324497129	0.324497129	0.324497129	0.324497129	0.324497129	0.324497129	0.324497129	0.324497129	0.324497129	0.324497129	0.324497129	0.324497129	0.324497129	0.324497129	0.324497129	0.324497129	0.324497129	0.324497129	0.324497129	0.324497129	0.324497129	0.324497129	0.324497129	0.324497129	0.324497129	0.324497129	0.324497129	0.324497129	0.324497129	0.324497129	0.324497129	0.324497129	0.324497129	0.324497129	0.324497129	0.324497129	0.324497129	0.324497129	0.324497129	0.324497129	0.324497129	0.324497129	0.324497129	0.324497129	0.324497129	0.324497129	0.324497129
201	0.326743379	0.327059172	0.327028863	0.32674454	0.32631977	0.32773963	0.327065047	0.327205127	0.326503501	0.327246083	0.327218547	0.326580515	0.327168557	0.327050299	0.326959788	0.327820806	0.327281803	0.327994447	0.327567583	0.326951033	0.328162972	0.327388772	0.328058121	0.327262588	0.327740349	0.326692311	0.328481065	0.328413303	0.328515793	0.327925554	0.327346199	0.328354605	0.327889274	0.327358505	0.327569471	0.327435607	0.327133769	0.327746793	0.328457987	0.328424028	0.327847141	0.328206387	0.327951951	0.328049337	0.330761889	0.327934315	0.328462123	0.328597629	0.327565497
202	0.340038527	0.342519474	0.341760357	0.340086636	0.336900372	0.34645326	0.341867406	0.343543997	0.338118722	0.3432499	0.342952005	0.339065861	0.342681209	0.342437564	0.341468115	0.347692172	0.343785034	0.348788548	0.346016062	0.341500954	0.350350451	0.344903081	0.349609648	0.343787622	0.347465677	0.339527066	0.35292022	0.351997676	0.352857024	0.348740236	0.344509285	0.351984004	0.348188366	0.34451895	0.345593426	0.345082663	0.342315734	0.347224908	0.35214422	0.353397291	0.348337056	0.350640321	0.349161739	0.349962255	0.369378932	0.34854284	0.352624206	0.354323551	0.34615185
203	0.364415941	0.371477325	0.368664815	0.364599925	0.355832123	0.381056033	0.368752463	0.374264234	0.358966698	0.372653426	0.371699678	0.362045049	0.371075305	0.371227669	0.368140647	0.385424197	0.37450578	0.388295406	0.380936514	0.368359443	0.393204227	0.378078792	0.391123257	0.37470493	0.385279099	0.362836097	0.400939821	0.397677439	0.400310519	0.388784822	0.376866034	0.398220217	0.386823518	0.376784594	0.379159962	0.37836091	0.369918256	0.384204268	0.397847769	0.403590379	0.387873876	0.393995865	0.390301	0.392709618	0.449697936	0.387863827	0.399862267	0.405795207	0.381523954
204	0.397738343	0.412097873	0.405721736	0.398154572	0.380900848	0.430256325	0.405690679	0.417694278	0.386821975	0.41362058	0.411564563	0.39334085	0.410431085	0.411570343	0.40495294	0.440245324	0.41774992	0.446025417	0.431150556	0.405519066	0.456909344	0.425524335	0.4525207	0.418350541	0.440459433	0.394438395	0.473915586	0.466219135	0.472068524	0.447716495	0.422919313	0.468014667	0.443172506	0.42264142	0.426874894	0.425878077	0.407956977	0.437800894	0.466315799	0.481071033	0.446042257	0.458557854	0.451258651	0.45651088	0.583841595	0.445396008	0.471340813	0.48536294	0.432581006
205	0.439426663	0.464503517	0.452705003	0.440187545	0.411048524	0.495297576	0.452453317	0.474292859	0.420758718	0.466339268	0.462617218	0.432205342	0.460760341	0.463557289	0.451643443	0.514238679	0.473963243	0.524524256	0.498041599	0.452746581	0.545033069	0.488226859	0.536972975	0.475215416	0.515152895	0.433634808	0.577082429	0.562027168	0.573116945	0.528293422	0.483468237	0.56602872	0.519561625	0.482864068	0.489771619	0.488633603	0.456313515	0.509907596	0.56192585	0.59199374	0.525478581	0.548041172	0.535145008	0.544975009	0.78293576	0.52365815	0.57201052	0.599515668	0.500830753
206	0.48991525	0.529883947	0.510407527	0.491155948	0.446056811	0.578119487	0.509815984	0.545544476	0.460747566	0.531998936	0.525928713	0.478887927	0.523086555	0.528347562	0.508987563	0.609804772	0.544587514	0.626278252	0.583722334	0.510856403	0.660084623	0.568074959	0.647054094	0.546793176	0.611830781	0.480700363	0.711987077	0.687208537	0.705141557	0.633101432	0.56025889	0.694310567	0.618459419	0.559172045	0.569701313	0.568506614	0.515872203	0.602866696	0.686753769	0.737101989	0.628781807	0.664909781	0.644597871	0.660694991	0.99041615	0.625162205	0.703640484	0.748284848	0.588471184
207	0.549409462	0.608146511	0.578943538	0.551268506	0.48590152	0.676667394	0.577885414	0.630969378	0.506863051	0.610409198	0.601412476	0.533580491	0.597375352	0.605875054	0.57712633	0.722366859	0.629142041	0.744827063	0.685844582	0.579983485	0.790465852	0.663675791	0.773372603	0.632548686	0.725733423	0.535812898	0.855323783	0.824655973	0.846679882	0.754811033	0.652261883	0.834074856	0.734353453	0.650575203	0.665127405	0.66406651	0.586680813	0.712782068	0.823802868	0.885567182	0.74920767	0.796676543	0.770622561	0.791967394	1.078105847	0.743598541	0.845140882	0.897259124	0.692827998
208	0.616186623	0.69404034	0.65516537	0.618733813	0.530159002	0.77733509	0.65357147	0.723077533	0.558442683	0.69611571	0.68436547	0.595079846	0.679237575	0.691082389	0.653024945	0.829719736	0.720339852	0.853011458	0.789198445	0.656927326	0.897511646	0.763340249	0.881682602	0.724819306	0.833861446	0.597691545	0.951251923	0.926727869	0.944294181	0.86376221	0.749394351	0.934937002	0.842430659	0.747217957	0.764187914	0.76357707	0.665102568	0.819416764	0.925763494	0.973793567	0.858392851	0.903050598	0.879552791	0.899533492	1.060314359	0.852041639	0.943352848	0.980893668	0.797442966
209	0.684514508	0.773524364	0.729786027	0.687618286	0.577369371	0.853748762	0.727768565	0.803680141	0.613097721	0.774903425	0.762121408	0.659127977	0.756634698	0.770326364	0.727603839	0.897635846	0.800476555	0.914356189	0.8651975	0.732184957	0.943523199	0.842529327	0.933900015	0.805195619	0.901255543	0.661918178	0.972163022	0.9595152	0.968451717	0.922368987	0.829386635	0.964284059	0.907051043	0.827202344	0.842438385	0.842520806	0.740782133	0.889810476	0.958764943	0.983210975	0.91895828	0.94672194	0.933013314	0.945330363	1.005077176	0.913945807	0.968218487	0.985567702	0.872383581
210	0.743965659	0.827736166	0.788125367	0.747202227	0.624452576	0.885863869	0.786033047	0.851920945	0.665909274	0.828062837	0.817061432	0.717481906	0.812396222	0.825015612	0.786338285	0.91233951	0.849025048	0.920477005	0.894139489	0.790758997	0.933538548	0.879876598	0.929724222	0.852844983	0.914724678	0.720060985	0.943111849	0.938882458	0.941664979	0.924845661	0.870738454	0.940961328	0.917149415	0.869087621	0.878963222	0.879649108	0.798046484	0.908251815	0.938376705	0.94685346	0.923522318	0.934704815	0.929824705	0.934871139	0.940476185	0.920551721	0.941847564	0.946623934	0.898674517
211	0.783056287	0.846254261	0.817995186	0.785856457	0.666622961	0.876866236	0.816228289	0.860878673	0.709810026	0.845612962	0.838273805	0.759923446	0.835237466	0.844473526	0.816925636	0.888066278	0.858771401	0.890036381	0.881654953	0.820349555	0.892667682	0.875574053	0.892401418	0.861159082	0.889385796	0.761847135	0.891655063	0.89194963	0.891420562	0.891793968	0.870954238	0.892504362	0.889467539	0.869994844	0.874224251	0.875227852	0.825012739	0.886853754	0.891607638	0.891684741	0.891823488	0.892636086	0.893041661	0.893624461	0.874229611	0.890387643	0.891798209	0.89027302	0.883722961
212	0.795944116	0.833271646	0.817742203	0.79792365	0.698395831	0.841726116	0.816499181	0.839249266	0.737990288	0.832000933	0.828368237	0.779441055	0.826986313	0.832421788	0.817415078	0.842766707	0.837937286	0.841058652	0.843924352	0.819525904	0.837805997	0.843540855	0.839463548	0.839052382	0.843377376	0.780451099	0.831442903	0.833965468	0.831804557	0.841244953	0.842317868	0.833734335	0.842100499	0.841913917	0.842040469	0.843151835	0.821411546	0.843329862	0.833719369	0.829731014	0.842030541	0.837141188	0.840365553	0.838519744	0.808791135	0.841545953	0.832265417	0.827819541	0.844309502
213	0.784752758	0.799263801	0.79414341	0.785851205	0.715528149	0.792646437	0.793407418	0.798992358	0.746966096	0.797660169	0.796886702	0.775654146	0.79678268	0.799121117	0.794396129	0.787487804	0.798294145	0.78371755	0.793137735	0.795336563	0.777311203	0.796316149	0.779964217	0.798493921	0.787663203	0.77577007	0.768331838	0.771921388	0.768979076	0.783013405	0.797317809	0.771297161	0.785645763	0.797293123	0.794800343	0.795920815	0.795022293	0.789074621	0.771728784	0.765829001	0.78419855	0.776325629	0.780985036	0.777879396	0.744849306	0.784266528	0.769473519	0.763721926	0.792478882
214	0.755826518	0.753030574	0.755458856	0.756177896	0.716596637	0.736696589	0.75512966	0.748559588	0.737624018	0.751273867	0.752505099	0.75317229	0.753293322	0.753378281	0.756111424	0.727845297	0.748297644	0.72293009	0.736103398	0.756160483	0.714837847	0.741435126	0.718003008	0.747880528	0.72775819	0.75257462	0.704647567	0.70870217	0.705416486	0.721723192	0.743834287	0.707890942	0.725342278	0.744056307	0.739956643	0.741048088	0.754302871	0.730012731	0.708539009	0.701859933	0.723118202	0.713691973	0.719075022	0.715319122	0.682747631	0.723505268	0.705920555	0.699716686	0.73481531
215	0.715243009	0.700039092	0.707716673	0.715017945	0.703025029	0.677576717	0.707693225	0.692823963	0.713575593	0.698228553	0.700818445	0.717631524	0.702207603	0.700715839	0.70863203	0.666552306	0.692862777	0.661019387	0.67630265	0.708038568	0.652086368	0.682916792	0.655486854	0.692040221	0.666308667	0.716517542	0.641493327	0.645665183	0.642288133	0.659537708	0.686178571	0.644788612	0.663686274	0.686558019	0.681491021	0.682542602	0.705145293	0.669042947	0.645516175	0.638712238	0.661036182	0.650872101	0.656574837	0.652518505	0.622559781	0.66160294	0.642789365	0.636619031	0.674639726
216	0.667521272	0.643588398	0.654878105	0.666868374	0.677635712	0.617249582	0.655079088	0.634580686	0.678887395	0.641773533	0.645279461	0.673676419	0.647070483	0.644484935	0.655963274	0.604962872	0.634826727	0.599125405	0.615545457	0.654914934	0.589860741	0.622923284	0.59333041	0.633736914	0.604628275	0.672205893	0.579345175	0.583427945	0.580108546	0.597508167	0.626720837	0.582559721	0.601911109	0.627201487	0.621550465	0.622562324	0.651335856	0.607624569	0.583283232	0.576743291	0.599047383	0.588633046	0.594414928	0.590268568	0.564208342	0.599707859	0.580600287	0.574749053	0.613660206
217	0.615725516	0.585617219	0.599425199	0.614758287	0.643472653	0.55680274	0.599791355	0.575418693	0.637037151	0.583821007	0.587954699	0.62464932	0.5900186	0.586663078	0.600620908	0.543817111	0.575809992	0.537865786	0.554827744	0.599248205	0.528578626	0.562651302	0.532017439	0.574541004	0.543433034	0.622937172	0.518428172	0.522298078	0.5191255	0.536199048	0.566782332	0.521482897	0.540687985	0.567328759	0.561327268	0.562302686	0.59521003	0.546556963	0.522151464	0.51610922	0.537741464	0.52737047	0.533087619	0.528978043	0.507562276	0.538441993	0.519604013	0.514242422	0.552814633
218	0.561653377	0.527145413	0.542718625	0.560453358	0.603199121	0.496808981	0.543207631	0.516164803	0.590557438	0.525380645	0.529944845	0.572625521	0.53219389	0.528292592	0.543985516	0.483510391	0.516658288	0.477573603	0.494673014	0.542379485	0.468466669	0.502724361	0.471809733	0.515270482	0.483104823	0.570750105	0.458861892	0.462443009	0.45947256	0.475914286	0.50705031	0.461708144	0.480377053	0.507638167	0.501445537	0.502387292	0.53803483	0.486265291	0.462290887	0.456885902	0.477434931	0.467299283	0.472858174	0.468867361	0.452466525	0.478140023	0.459935271	0.455163176	0.492596887
219	0.506429679	0.468835525	0.485614089	0.505057215	0.558776707	0.437701081	0.486194352	0.457379697	0.541147991	0.467112246	0.471959439	0.518918435	0.474328169	0.470048181	0.48692341	0.42438095	0.457943502	0.418556602	0.435484691	0.48515152	0.409777224	0.443597142	0.412977394	0.456482146	0.423973131	0.516935298	0.400836998	0.404084311	0.401350797	0.416944562	0.448013014	0.403444777	0.42129875	0.44862406	0.442363004	0.443271581	0.480612848	0.427102619	0.403925511	0.399229816	0.418423825	0.408665902	0.413996617	0.4101832	0.398844489	0.419109451	0.401795007	0.397660765	0.433394272
220	0.450906596	0.411272205	0.428804786	0.449408851	0.51167344	0.37995861	0.429451435	0.399596158	0.490047637	0.409601961	0.414611398	0.464498541	0.417045966	0.412521007	0.430133063	0.366865616	0.40020565	0.361241518	0.377724363	0.428248946	0.352912579	0.385752216	0.35592977	0.398707811	0.366468568	0.46244977	0.344722419	0.347611516	0.345137718	0.359706375	0.390168853	0.3470726	0.363883191	0.390788166	0.384567602	0.385439496	0.423608062	0.369510923	0.347447537	0.343480744	0.361125271	0.351870289	0.356909485	0.353321696	0.346783821	0.361775321	0.345559451	0.342071921	0.375660604
221	0.39585247	0.355162766	0.373015126	0.394271658	0.462988884	0.324329267	0.373705858	0.343526359	0.438208812	0.35356393	0.358616261	0.410180741	0.361062647	0.35641863	0.37433835	0.311730264	0.344159835	0.306407474	0.322134985	0.372392064	0.298661716	0.329917218	0.30145113	0.342662204	0.31135362	0.408104268	0.291304871	0.293820614	0.2916266	0.304976193	0.334240262	0.293380633	0.308902278	0.334852996	0.32879543	0.329620877	0.367741401	0.314249945	0.2936559	0.290401819	0.306311002	0.297703058	0.302375143	0.29906507	0.296763717	0.306913389	0.292019337	0.289161093	0.320140956
222	0.34210786	0.301387916	0.319099412	0.340485514	0.413727629	0.271790709	0.319812366	0.290080428	0.386544896	0.299887631	0.30485331	0.356814689	0.307251927	0.302619152	0.320390324	0.259989077	0.29071707	0.255087174	0.269694569	0.318433434	0.248074524	0.27704298	0.250584512	0.289259308	0.259640279	0.354748897	0.241637872	0.243771535	0.241876464	0.253786383	0.28116516	0.243423125	0.257379322	0.281755249	0.276006246	0.276768893	0.313876026	0.262324908	0.24361316	0.241026308	0.255007742	0.247216385	0.251430652	0.2484571	0.249544877	0.255552906	0.242231258	0.239963201	0.267818659
223	0.290642319	0.251172414	0.268165228	0.289028638	0.36465221	0.223776258	0.268874433	0.240562136	0.335850957	0.249810315	0.254525802	0.305296425	0.256800375	0.252338887	0.269387614	0.213146695	0.241177786	0.208813118	0.22184702	0.267483977	0.202713848	0.228523627	0.204882216	0.239809269	0.212833464	0.303290384	0.197298836	0.199042312	0.197467901	0.20767364	0.232309695	0.198775215	0.2108337	0.232857293	0.227603612	0.22828016	0.263154323	0.215226356	0.198899241	0.196918854	0.208745091	0.201976506	0.205622531	0.203056129	0.20645337	0.209222939	0.197773738	0.196045075	0.220149084
224	0.242847317	0.206169716	0.221763198	0.241304298	0.31670352	0.182021327	0.222437797	0.196672575	0.287211935	0.204992013	0.209268605	0.256911587	0.211329964	0.207225135	0.222872808	0.172924997	0.197240605	0.169291541	0.180327897	0.2210991	0.164252372	0.186091271	0.166030446	0.196015831	0.172654119	0.255028408	0.159917389	0.161278453	0.160032646	0.168338907	0.189399329	0.161079686	0.17097972	0.189883346	0.185320549	0.185887059	0.21715944	0.174681503	0.161158642	0.159702732	0.169228865	0.163651092	0.16664104	0.164536808	0.169081272	0.169631453	0.16028103	0.15902174	0.178866865
225	0.200250686	0.167901752	0.181451594	0.198845192	0.27101821	0.147837568	0.182060544	0.159876211	0.241934016	0.166947367	0.170614328	0.213132918	0.172380489	0.168804421	0.182405228	0.140502059	0.160373423	0.137636815	0.1464283	0.180837603	0.133709984	0.151110015	0.135083779	0.159337944	0.140276765	0.211443116	0.130428129	0.131439655	0.130505891	0.136880497	0.153833772	0.131294073	0.138962242	0.154237807	0.150510614	0.150950936	0.177444303	0.141897318	0.131347866	0.13031432	0.137574112	0.133248042	0.135553443	0.133926135	0.138570682	0.137899508	0.130694067	0.129815386	0.145243016
226	0.16444323	0.137594234	0.148667316	0.163236069	0.22895293	0.121922155	0.149185796	0.131220647	0.201555273	0.136878563	0.139834774	0.175581061	0.14125549	0.138319879	0.149434801	0.11632549	0.131633836	0.114188336	0.120804662	0.148131026	0.111278192	0.124386585	0.112286759	0.130808633	0.116143347	0.174151492	0.108904172	0.109629552	0.108958962	0.113612552	0.126499396	0.10952146	0.115171831	0.126817992	0.123957973	0.124272582	0.145391072	0.117372581	0.109565165	0.108839503	0.114122613	0.110940902	0.112625034	0.111427908	0.115473747	0.11437791	0.109092826	0.108493199	0.119895118
227	0.136318076	0.115155942	0.12378082	0.135336998	0.192043759	0.103412497	0.124202281	0.110313338	0.167561564	0.114656121	0.116932909	0.145414748	0.118021	0.115713085	0.124363408	0.099261918	0.11064679	0.097711534	0.102544428	0.123332162	0.095599996	0.105189444	0.096324057	0.110013869	0.099114581	0.144278654	0.093911504	0.094428385	0.09395355	0.097278279	0.106769932	0.094344436	0.098420622	0.107012936	0.104904911	0.105113523	0.121238551	0.100024835	0.094386295	0.093865435	0.097641927	0.095359153	0.096557889	0.095695661	0.0989267	0.097842296	0.094045231	0.093632339	0.101866454
228	0.115589065	0.099410057	0.105971482	0.114821685	0.161458611	0.090743456	0.106306583	0.095796342	0.140697987	0.099081574	0.100800438	0.122706045	0.101613429	0.099829263	0.106396532	0.087669072	0.096065303	0.086547274	0.090063687	0.105602802	0.085009749	0.092000066	0.085530193	0.09558492	0.087546865	0.121850781	0.083802248	0.084176624	0.083837783	0.086216412	0.093171966	0.08410732	0.087056362	0.093356411	0.09182434	0.091952928	0.104056884	0.088222838	0.084151097	0.083759638	0.08647366	0.084837674	0.085688076	0.085065303	0.087533161	0.086634978	0.083899147	0.083605361	0.089559053
229	0.10109833	0.088791004	0.093793559	0.100505954	0.137631428	0.082353109	0.094061244	0.086078537	0.120748791	0.088587858	0.089892087	0.10655865	0.090499591	0.089107908	0.094098433	0.080038675	0.086300286	0.079217696	0.081806494	0.093488045	0.078079831	0.083238558	0.078458599	0.085930912	0.079933626	0.105937558	0.077203114	0.077481434	0.077235552	0.078957655	0.084117877	0.077420828	0.07958642	0.084260255	0.083140691	0.083212021	0.092358082	0.080445232	0.077467876	0.077157594	0.079140225	0.077955546	0.07856289	0.078106472	0.079949892	0.079274947	0.077275569	0.077057543	0.081424489
230	0.091362115	0.081870819	0.085755674	0.090900601	0.120114217	0.077008986	0.085974355	0.079797399	0.106689416	0.081756806	0.082765695	0.095566105	0.083226475	0.082114924	0.085973907	0.075228497	0.079985907	0.07461914	0.076555302	0.085496228	0.07376127	0.077632158	0.074040683	0.079694969	0.075135076	0.09512254	0.073114664	0.073327302	0.073145802	0.074408241	0.078305362	0.073271872	0.074889025	0.078418139	0.077589679	0.077620273	0.084665471	0.075531474	0.073322449	0.073063924	0.074538142	0.073670498	0.074106896	0.073766938	0.075120878	0.074654748	0.073170631	0.073001727	0.076259415
231	0.085063993	0.077573944	0.080667673	0.084696296	0.107865281	0.073828312	0.08085162	0.075952575	0.097197513	0.07752337	0.078323355	0.088361602	0.078680255	0.077766567	0.080824416	0.07242579	0.076117795	0.071966593	0.073439845	0.08044083	0.071306709	0.074264908	0.071515792	0.075882248	0.072340313	0.088046139	0.070821868	0.070989025	0.070852608	0.071790122	0.074792231	0.070936696	0.072166276	0.074884113	0.074262142	0.074263526	0.079822263	0.072655276	0.070990522	0.070765539	0.071882552	0.071239658	0.071554736	0.071297094	0.072274946	0.071986696	0.070866555	0.070730047	0.073204869
232	0.081211221	0.075141735	0.077674154	0.080910177	0.099661832	0.072189718	0.077833521	0.073841482	0.091051454	0.075136548	0.075788244	0.083863742	0.076071342	0.07529781	0.077787162	0.071055509	0.073990325	0.070703059	0.071847209	0.077470305	0.070183479	0.072493199	0.070342685	0.073794058	0.070975498	0.083639489	0.069812732	0.069948192	0.069843475	0.070550804	0.072916878	0.069897753	0.0708528	0.072993951	0.072518977	0.072499365	0.077002586	0.071232738	0.069954298	0.06975141	0.070616545	0.070133249	0.070362109	0.07016278	0.070857226	0.070712056	0.069849634	0.069734808	0.071655455
233	0.079099969	0.074041684	0.076174959	0.078846417	0.094415895	0.071653921	0.076316876	0.072969724	0.087299911	0.074068954	0.074615232	0.081292427	0.074845815	0.074171775	0.076256777	0.070710135	0.073107016	0.070433526	0.071343868	0.075987383	0.070013467	0.071862599	0.070137271	0.072938625	0.070633928	0.081133284	0.069723465	0.069836647	0.069754329	0.070298367	0.072212661	0.069787424	0.070547768	0.072279232	0.071908809	0.071874168	0.075627158	0.070850235	0.069846068	0.069658167	0.070345121	0.069975176	0.070142766	0.069984797	0.070469936	0.070434595	0.069754928	0.069654964	0.071182779
234	0.078231703	0.073892608	0.075742301	0.078011982	0.091296239	0.071905939	0.075871829	0.072982853	0.085258495	0.07394299	0.074414387	0.080096029	0.074607652	0.074004241	0.075801922	0.07109773	0.073111957	0.07087519	0.071618964	0.07556626	0.070526166	0.072047153	0.070624693	0.072963366	0.071024235	0.079983374	0.07029389	0.070391125	0.07032483	0.07075223	0.072344872	0.070342781	0.070964119	0.072403982	0.072107916	0.072062571	0.075282492	0.071211376	0.070402911	0.070225764	0.070785441	0.070496403	0.070620248	0.070491811	0.070825735	0.070870607	0.070321456	0.070232144	0.071479701
235	0.078260087	0.074429246	0.076078383	0.078064267	0.089722387	0.07272703	0.076199152	0.073634393	0.084455583	0.074495939	0.074914339	0.079892478	0.075081213	0.074527813	0.07612233	0.072015546	0.073757662	0.071831617	0.072456595	0.075910506	0.071533554	0.072820392	0.071613948	0.073623124	0.071944045	0.079812687	0.07134295	0.071428531	0.071373846	0.071717466	0.07308091	0.071380929	0.071902476	0.073134711	0.072891422	0.072838526	0.075680747	0.07211032	0.071441978	0.071273123	0.071741014	0.071509912	0.071602442	0.071495207	0.071723438	0.071823024	0.071367642	0.071286404	0.072332898
236	0.078908247	0.07544037	0.076945873	0.078729453	0.089227316	0.073942717	0.077060357	0.074728039	0.08451181	0.075518626	0.075899011	0.080375585	0.076047	0.075529564	0.076978662	0.073301554	0.074847034	0.073145693	0.07368447	0.076783883	0.072885032	0.074001755	0.072952131	0.074722639	0.073231607	0.080319141	0.072725431	0.072802093	0.072756116	0.073038112	0.074235402	0.072755232	0.073203432	0.074285354	0.074080039	0.074021808	0.07659263	0.073382633	0.072816694	0.072654972	0.07305466	0.072865881	0.072935562	0.072843911	0.073001644	0.073134235	0.072747875	0.072673361	0.07357209
237	0.079992392	0.076785832	0.078187423	0.079825798	0.089496015	0.075436803	0.078297342	0.076133391	0.085173744	0.076872284	0.077225111	0.081341779	0.077359467	0.076868231	0.078212228	0.074847522	0.076249181	0.074712346	0.075187756	0.078029753	0.074479677	0.075471058	0.074536841	0.076132206	0.074778851	0.08130195	0.074343818	0.074413334	0.074374115	0.074609811	0.075685056	0.074367277	0.074760436	0.075732175	0.075554442	0.075492462	0.077866132	0.074918533	0.074428716	0.074273695	0.074621229	0.074463888	0.074516631	0.074436673	0.074551633	0.074698837	0.074364401	0.074295969	0.075083729
238	0.081388394	0.07837069	0.079696735	0.081230567	0.090311872	0.077130139	0.079803312	0.077761925	0.086268709	0.07846292	0.07879567	0.082653352	0.078920147	0.078448138	0.079715821	0.076579514	0.077875273	0.076459734	0.076888159	0.079542271	0.076248387	0.077146482	0.076297994	0.077763768	0.07651193	0.082625345	0.076131263	0.076194782	0.076161	0.076361176	0.077346018	0.076149621	0.076500665	0.077391032	0.077233408	0.077168825	0.079398517	0.076643061	0.07621067	0.076062339	0.076368807	0.076235161	0.07627517	0.076204157	0.076298684	0.076444765	0.076150218	0.076087664	0.076790359
239	0.083008633	0.080127499	0.081398531	0.082857105	0.091520924	0.07896636	0.081502655	0.079550663	0.087674753	0.080223771	0.080541864	0.084213208	0.080659179	0.080201332	0.081413529	0.078444858	0.079662127	0.078336689	0.078729899	0.08124646	0.078141955	0.078969751	0.078185678	0.079554674	0.07837823	0.0841936	0.078040189	0.078098416	0.0780692	0.078241357	0.07915858	0.078054255	0.078372239	0.079202017	0.079059099	0.078992736	0.081116977	0.078502809	0.078114605	0.07797324	0.078246158	0.078130735	0.078160978	0.078096985	0.078189433	0.078320683	0.078057639	0.078001068	0.078636791
240	0.0847905	0.082007898	0.08323888	0.084643475	0.093013865	0.080905149	0.083341206	0.081454463	0.089305296	0.082106973	0.082414358	0.085952123	0.082526482	0.082079088	0.083250966	0.080405952	0.081564456	0.080306719	0.080673087	0.083088595	0.080125348	0.080899144	0.080164333	0.081460025	0.080340189	0.085938458	0.080036772	0.080090077	0.080064898	0.080214098	0.081079979	0.080047035	0.080338144	0.081122223	0.080990118	0.080922562	0.082969335	0.080459635	0.080106415	0.079972516	0.080216744	0.080115753	0.080138278	0.080079992	0.080185814	0.080289976	0.080052759	0.08000251	0.080583572
241	0.086688096	0.08397652	0.085178275	0.086544271	0.094711107	0.082917173	0.085279284	0.083440368	0.091097125	0.084077533	0.084377057	0.08781938	0.084485409	0.084045767	0.085188285	0.082435501	0.083549198	0.082343366	0.082688708	0.085029319	0.082173208	0.082904273	0.082208204	0.083447044	0.082370547	0.087809906	0.082096578	0.082145073	0.08212366	0.082253121	0.083079042	0.082103279	0.082371528	0.083120367	0.082996319	0.082927976	0.084917384	0.082485838	0.082161448	0.082035694	0.082254074	0.082164994	0.082181156	0.082127726	0.082260274	0.082326098	0.082111078	0.082067679	0.082602012
242	0.088663873	0.086004557	0.087184477	0.088522353	0.096547078	0.084978598	0.08728451	0.08548156	0.092998276	0.086106954	0.086400554	0.089773419	0.086506091	0.086072337	0.087192971	0.08451136	0.085589446	0.084425175	0.084753198	0.087036519	0.08426499	0.084960438	0.084296418	0.085489065	0.084447184	0.089766973	0.084199827	0.084243409	0.084225704	0.084337118	0.085130421	0.084203004	0.084450609	0.085171014	0.0850532	0.084984332	0.086929966	0.084558935	0.08425974	0.084142969	0.084336662	0.084258023	0.084268606	0.084219563	0.084390518	0.084407516	0.084212765	0.084176907	0.084668817
243	0.09069343	0.088073404	0.08923659	0.090553589	0.098479188	0.087074184	0.089335892	0.087560776	0.09497501	0.088176837	0.088465839	0.09178722	0.088569215	0.088140041	0.08924394	0.086619442	0.087667875	0.086538531	0.086851499	0.089089383	0.08638771	0.087051809	0.086415765	0.087568923	0.086556032	0.091783024	0.086334078	0.086372487	0.086358587	0.086452581	0.08721785	0.086333622	0.08656155	0.087257834	0.08714507	0.087075837	0.088986902	0.08666461	0.086388715	0.086281888	0.086450878	0.086381934	0.086387326	0.086342465	0.086562488	0.086520565	0.086345337	0.086317839	0.086769113
244	0.092769036	0.090177526	0.091328211	0.092630348	0.100492967	0.089199702	0.091426989	0.089672997	0.097016134	0.090281731	0.090567229	0.093852071	0.090668976	0.090243285	0.091334717	0.088755981	0.089779448	0.088679865	0.088979456	0.091181535	0.088538066	0.089173927	0.088562843	0.089681642	0.088693334	0.093849495	0.08849628	0.088529175	0.088519251	0.088595981	0.089336697	0.088492011	0.088700691	0.089376173	0.089267522	0.089198046	0.091082062	0.088799004	0.088545248	0.088449421	0.088593146	0.08853346	0.088533877	0.088493111	0.08877279	0.088661654	0.08850572	0.088487489	0.088898818
245	0.094877367	0.092307036	0.093448101	0.094739465	0.10256421	0.091347278	0.093546509	0.091809133	0.099102737	0.092411881	0.092694606	0.09595308	0.092795077	0.092372096	0.093453949	0.090913795	0.091915041	0.090842283	0.0911293	0.093301783	0.09070956	0.091318556	0.090731011	0.091818191	0.090851918	0.095951728	0.090680291	0.090707221	0.090701549	0.090760491	0.091478466	0.090671929	0.090860999	0.091517501	0.091412408	0.091342747	0.093204636	0.090954795	0.090723102	0.09063944	0.09075656	0.09070615	0.09070156	0.090664968	0.091014604	0.090823858	0.090687745	0.090679797	0.091050272
246	0.097015171	0.094459946	0.09559378	0.096877745	0.104685742	0.093515706	0.095691955	0.093967496	0.101229556	0.094565356	0.094845907	0.098086423	0.094945383	0.09452445	0.095599113	0.093091955	0.094072958	0.093024984	0.093299859	0.095447657	0.092901566	0.093484341	0.092919575	0.093976911	0.093030857	0.098085994	0.092885677	0.092906125	0.092905038	0.092945333	0.093641699	0.092872884	0.093041613	0.093680344	0.09357841	0.093508592	0.095352304	0.093130994	0.092921781	0.092851542	0.092940311	0.092899404	0.092889657	0.092857399	0.09328763	0.093006359	0.092890955	0.092894399	0.093222346
247	0.099179446	0.096634488	0.097763002	0.099042241	0.106850719	0.095704007	0.097861068	0.096146616	0.103391614	0.096740449	0.097019297	0.100248535	0.09711799	0.096698547	0.097767911	0.09528975	0.09625172	0.095227383	0.095490176	0.097616917	0.09511369	0.095670138	0.09512807	0.096156354	0.095229445	0.100248821	0.095112253	0.095125623	0.095129519	0.095149954	0.09582515	0.095094628	0.095241887	0.095863445	0.095764427	0.095694449	0.097522984	0.09532683	0.095141027	0.095085604	0.095143812	0.095112852	0.095097679	0.095069998	0.095592028	0.095208561	0.095115143	0.095131208	0.095414129
248	0.101365248	0.098827895	0.099952104	0.10122811	0.109047672	0.097910731	0.100050148	0.098344251	0.105580586	0.098934445	0.099211824	0.102433529	0.099309832	0.098891561	0.099956623	0.097506289	0.098449047	0.097448817	0.097698924	0.099805945	0.097345645	0.097874296	0.097356075	0.098354311	0.097446824	0.102434448	0.097360157	0.097365669	0.097375083	0.097373775	0.098026981	0.097337167	0.097461053	0.098064936	0.097968833	0.097898674	0.099713279	0.097541307	0.09738079	0.097341902	0.097366432	0.097346253	0.097325178	0.097302482	0.097928834	0.097429783	0.097360387	0.097390573	0.097624383
249	0.103573312	0.101041024	0.102161868	0.103436092	0.111277123	0.1001368	0.102259964	0.100561294	0.107797075	0.101148179	0.101424302	0.10464211	0.101521717	0.101104344	0.102166032	0.099742583	0.100665814	0.09969032	0.099927068	0.102015536	0.099598537	0.100097757	0.099604677	0.100571669	0.099684021	0.104643569	0.099630593	0.09962741	0.099642913	0.09961786	0.100248115	0.099601678	0.099700139	0.100285734	0.100192548	0.100122202	0.101923974	0.099775425	0.099642212	0.099621705	0.099609232	0.099600723	0.099573246	0.099555975	0.100299795	0.099671066	0.099627873	0.099673777	0.09985409
250	0.105804258	0.103273964	0.104392614	0.105666783	0.113541198	0.102381987	0.104490853	0.102797704	0.110042493	0.103381741	0.103656882	0.106875115	0.103753825	0.103337001	0.104396473	0.10199824	0.102901998	0.101951437	0.102174335	0.104245996	0.101871796	0.102340329	0.101873342	0.102808385	0.101940629	0.106876998	0.101922846	0.101910202	0.101932316	0.101881722	0.102488409	0.101887487	0.101958717	0.102525707	0.102435385	0.102364844	0.10415533	0.102028822	0.101924649	0.101924233	0.101871739	0.101875673	0.101841353	0.101829894	0.102703705	0.101931957	0.101916907	0.101980015	0.102102948
251	0.108058353	0.105529223	0.106645894	0.107920547	0.115834231	0.104650351	0.106744316	0.105056582	0.112313963	0.105637695	0.105911862	0.109131903	0.106008331	0.105591974	0.106649433	0.104278098	0.105160658	0.104237348	0.104444956	0.106498921	0.104171223	0.104605826	0.104167644	0.105067599	0.104221532	0.109134219	0.104243553	0.104220297	0.104249825	0.104170675	0.104751444	0.104200961	0.104241809	0.104788399	0.104701188	0.104630421	0.106409167	0.104306182	0.10423435	0.104256492	0.104159182	0.104176992	0.104135028	0.104130054	0.105151139	0.104217614	0.104234002	0.104316457	0.104375309
252	0.110335518	0.107806047	0.108921241	0.110197276	0.118157924	0.106940673	0.109019902	0.107336998	0.114612347	0.107915272	0.108188552	0.111412666	0.108284584	0.107868528	0.108924466	0.106580705	0.107440875	0.106546496	0.10673766	0.108773833	0.106495077	0.106893101	0.106485909	0.107348366	0.106525264	0.111415387	0.106590722	0.106555818	0.106593479	0.106483123	0.107036146	0.10654019	0.106547906	0.107072747	0.106988804	0.106917787	0.108684937	0.1066061	0.106569437	0.106616379	0.106469992	0.106502912	0.106452611	0.106454709	0.107638921	0.106526487	0.106577203	0.10668095	0.106669866
253	0.112636966	0.110105836	0.111219969	0.11249819	0.120513162	0.10925453	0.11131892	0.109640415	0.116938676	0.110215874	0.11048833	0.113718559	0.110583949	0.110168059	0.11122288	0.108907757	0.109744104	0.108880635	0.109054052	0.111072047	0.108845234	0.109203704	0.108829968	0.109652155	0.108853532	0.113721664	0.108966417	0.108918734	0.108965312	0.108820849	0.109344033	0.108907173	0.108878737	0.109380264	0.10929978	0.109228489	0.110983977	0.108930247	0.108931875	0.109006064	0.108805937	0.108855324	0.108795928	0.108805744	0.110170336	0.108860329	0.10894854	0.109075699	0.108988243
254	0.114967349	0.112434591	0.113547465	0.114827994	0.12290164	0.11159904	0.113646736	0.11197324	0.119295985	0.11254553	0.112817052	0.116053744	0.112912203	0.112496522	0.113550024	0.111267047	0.112076716	0.111247866	0.111401402	0.113398982	0.11123044	0.111544577	0.11120833	0.111985395	0.111214188	0.116057277	0.111380335	0.111318274	0.111374881	0.111192107	0.111681864	0.11131129	0.11124226	0.11171768	0.111641065	0.111569471	0.113311844	0.111286283	0.111330876	0.111435747	0.1111752	0.111243064	0.111173462	0.111191942	0.112760822	0.111227227	0.111357554	0.111511088	0.111337818
255	0.117324211	0.114789145	0.115900886	0.117184204	0.125322463	0.113970446	0.116000516	0.114332093	0.12168267	0.114901059	0.115171628	0.118416024	0.115266297	0.114850774	0.115903075	0.11365446	0.114435349	0.113643912	0.113775874	0.115751777	0.11364608	0.113912056	0.113616503	0.114344692	0.113603087	0.118419996	0.113827358	0.113749565	0.11381714	0.11359254	0.114046072	0.11374759	0.113634275	0.114081443	0.114008991	0.113937068	0.115665605	0.113670164	0.113761577	0.113900043	0.113573461	0.113661468	0.113580734	0.113608666	0.115402229	0.113622914	0.113799207	0.113981635	0.113714696
256	0.119713139	0.117175767	0.118286161	0.11957243	0.127780285	0.116375762	0.118386175	0.116723497	0.12410375	0.117288744	0.117558238	0.120810787	0.117652369	0.117237057	0.118287945	0.116077557	0.116826501	0.116076596	0.116184609	0.118136379	0.116100553	0.116313035	0.116062672	0.116736587	0.116027839	0.120815234	0.116316796	0.116221462	0.116301263	0.116030104	0.116443421	0.116225074	0.116062482	0.116478297	0.116410455	0.116338176	0.118051271	0.11608934	0.116232813	0.116408773	0.116008614	0.116119017	0.116025904	0.116064352	0.118110206	0.1160552	0.116282656	0.116497342	0.116126103
257	0.122136995	0.119597674	0.12070633	0.121995546	0.130277494	0.118818587	0.120806746	0.119150802	0.126561796	0.119711808	0.119980051	0.123240794	0.120073566	0.119658575	0.120707664	0.118540214	0.119253507	0.118549928	0.118631269	0.120555836	0.118598167	0.11875105	0.118551032	0.119164434	0.118492345	0.12324577	0.118853422	0.118738505	0.11883195	0.11850888	0.118877379	0.118748354	0.118530831	0.1189117	0.118848993	0.11877633	0.120471928	0.118547631	0.118749117	0.118966971	0.118484705	0.11862006	0.118513157	0.118563325	0.120892779	0.118528092	0.118812593	0.119063338	0.118575744
258	0.124593128	0.122051887	0.123158579	0.12445089	0.132811879	0.12129559	0.12325942	0.121610908	0.129054427	0.122167268	0.122434133	0.12570349	0.122526974	0.122112364	0.123159427	0.121038842	0.121713281	0.121060195	0.121112463	0.123007327	0.121134936	0.121222828	0.121077699	0.121625128	0.120992994	0.125709032	0.121432818	0.12129649	0.121404849	0.121025089	0.121344736	0.12131316	0.121035665	0.12137845	0.121321333	0.121248258	0.12292472	0.121041501	0.121306292	0.121569976	0.120997989	0.121160571	0.121038617	0.121101579	0.123742518	0.121037882	0.121384674	0.121674875	0.121060188
259	0.127092811	0.124550539	0.12565454	0.126949754	0.135394809	0.123820245	0.125755814	0.124116378	0.13159277	0.124667266	0.124932467	0.128210014	0.12502451	0.124610511	0.125654844	0.123588078	0.12421833	0.123622615	0.123641942	0.125502505	0.12372744	0.123741625	0.12365874	0.124131253	0.123544544	0.128216182	0.124073818	0.123913091	0.12403843	0.123594276	0.123858491	0.123937546	0.123591936	0.123891506	0.123840713	0.123767211	0.125421392	0.123585347	0.123921963	0.124237961	0.123563869	0.123757324	0.123618311	0.123695799	0.12669628	0.123599773	0.124017332	0.124352591	0.123593366
260	0.129635515	0.127093183	0.128193745	0.129491613	0.138025287	0.126392081	0.128295457	0.126666766	0.134176068	0.127211359	0.127474605	0.130759782	0.127565725	0.127152571	0.128193446	0.126187381	0.126768211	0.126236607	0.126219214	0.128040905	0.126374989	0.126306973	0.126293506	0.126682362	0.126146443	0.130766641	0.126775527	0.126587525	0.126731834	0.12621583	0.126418188	0.126620689	0.126199081	0.126450412	0.126406673	0.126332723	0.127961484	0.126178644	0.12659535	0.126969897	0.126181744	0.126409611	0.126251588	0.126345279	0.129751097	0.126213183	0.126709711	0.12709541	0.126174775
261	0.132223407	0.129682209	0.130778469	0.132078642	0.140705277	0.129013766	0.130880619	0.129264555	0.136806348	0.129801942	0.130062907	0.133354905	0.130152963	0.129740925	0.130777501	0.128839634	0.129365397	0.12890516	0.128846999	0.130624808	0.129080814	0.128921496	0.128985138	0.129280945	0.128801597	0.133362531	0.129541563	0.129323212	0.129488618	0.128892799	0.129026399	0.129366074	0.128860041	0.129057733	0.129021835	0.128947417	0.130547299	0.128824232	0.129329867	0.129769623	0.128854637	0.129120698	0.128941581	0.129053266	0.132913468	0.1288811	0.129465362	0.129907252	0.128807168
262	0.134859132	0.132320522	0.133411479	0.134713495	0.143437238	0.131688535	0.133514061	0.13191276	0.139486116	0.132441923	0.132700238	0.13599797	0.132789072	0.132378466	0.133409769	0.13154834	0.132012888	0.131631908	0.131528594	0.133256985	0.131848847	0.131588375	0.131737455	0.131930021	0.131513533	0.136006446	0.132376342	0.132124321	0.132313122	0.131628885	0.131686245	0.132177951	0.131578389	0.131716581	0.131689379	0.131614475	0.133181636	0.131525557	0.132129673	0.132641836	0.131586219	0.131894557	0.131692098	0.131823713	0.136191482	0.131607152	0.132288615	0.132792911	0.131493884
263	0.137549895	0.13501595	0.136100208	0.137403383	0.146228896	0.134425379	0.136203202	0.134619572	0.142222673	0.135139133	0.135394297	0.138696132	0.135481702	0.135072988	0.136097669	0.134323584	0.134718828	0.134427496	0.134273252	0.13594489	0.134691088	0.134316413	0.134561941	0.134637799	0.134292459	0.138705548	0.13529419	0.135003966	0.135219288	0.134435055	0.1344063	0.135069827	0.134364514	0.134435492	0.134418089	0.134342695	0.135872009	0.134292481	0.135007825	0.135602296	0.134387321	0.134743381	0.13451458	0.134668721	0.139621183	0.134401972	0.135193375	0.135768651	0.134244343
264	0.140300223	0.137773429	0.138849351	0.140152846	0.149084887	0.137229915	0.138952728	0.137390144	0.145020509	0.137898515	0.138149949	0.141453863	0.138235684	0.137829407	0.138845888	0.13717159	0.137488339	0.137298454	0.137086732	0.138693229	0.137614803	0.137111116	0.137465584	0.137409441	0.13714466	0.141464317	0.138303619	0.137970011	0.138215422	0.137318013	0.137191938	0.138049778	0.137224804	0.137219818	0.137213463	0.13713758	0.138623164	0.137131099	0.137972162	0.138660272	0.137264572	0.137674542	0.137415992	0.137595611	0.143222215	0.137272085	0.138187929	0.138844005	0.137064397
265	0.143111881	0.14059491	0.14166077	0.142963651	0.152006647	0.140104262	0.141764497	0.140226487	0.147881198	0.140722023	0.14096912	0.144272866	0.141052934	0.140649667	0.141656281	0.140094583	0.140323428	0.140247056	0.139971178	0.141503869	0.140622361	0.139974575	0.140450719	0.140246962	0.140072373	0.144284465	0.141407124	0.141024893	0.141304003	0.140280055	0.140045224	0.14112026	0.140161511	0.140071618	0.140077594	0.140001222	0.141436987	0.140043618	0.141025118	0.141818318	0.140220258	0.14069042	0.140398662	0.140606754	0.146997249	0.140219761	0.141274754	0.142021548	0.139956206
266	0.145988449	0.143484307	0.144538189	0.14583939	0.154997716	0.143052838	0.144642226	0.143132678	0.150808231	0.143613575	0.14385567	0.147156664	0.143937288	0.143537667	0.144532566	0.143097417	0.143228151	0.143278376	0.14293111	0.144380543	0.143719352	0.142911127	0.143522737	0.143154447	0.143080497	0.147169525	0.144611159	0.144174617	0.144491345	0.143326375	0.142970397	0.144287424	0.143179608	0.14299512	0.143014815	0.142937958	0.144317245	0.143034802	0.144172679	0.145083404	0.143259521	0.143796677	0.143467967	0.143707777	0.150960117	0.143250068	0.144460147	0.145308431	0.142924358
267	0.148936139	0.146448581	0.147488132	0.14878629	0.158064325	0.14608383	0.147592423	0.146116065	0.153807672	0.146580143	0.146816427	0.150111356	0.146895516	0.14650033	0.147481248	0.146189397	0.146209808	0.146402293	0.145974976	0.147329795	0.14691705	0.145928755	0.146692381	0.146139264	0.146178453	0.150125611	0.147929435	0.147431623	0.147790755	0.146467179	0.145975206	0.147564119	0.14628871	0.145998031	0.146033096	0.145955768	0.147270557	0.146113722	0.14742723	0.148470767	0.146392422	0.147004789	0.146634599	0.146910055	0.155149958	0.146372871	0.147757377	0.148720438	0.145977472
268	0.151965533	0.14949975	0.150521773	0.151814962	0.161217175	0.149211688	0.150626228	0.149189427	0.156889858	0.149633768	0.149863154	0.15314731	0.149939273	0.149549603	0.150513465	0.149387216	0.149281083	0.14963667	0.149117743	0.150362836	0.150236172	0.149041499	0.149979269	0.14921423	0.149383176	0.153163126	0.151387726	0.15081903	0.151227164	0.149720987	0.149073219	0.150974316	0.149506138	0.149093845	0.149146457	0.149068685	0.150308279	0.149296601	0.150811778	0.152009376	0.149637196	0.150335885	0.149918079	0.15023451	0.159647938	0.149606002	0.151191287	0.152287684	0.149130853
269	0.15507876	0.15264005	0.153641292	0.15492754	0.164458322	0.15243875	0.153745819	0.152355038	0.16005686	0.152776686	0.15299807	0.156266631	0.153070771	0.152687718	0.153631395	0.152693274	0.152444243	0.15298393	0.152361766	0.153481851	0.15367917	0.152251682	0.153385847	0.152381621	0.15269707	0.156284178	0.154988479	0.154339295	0.154803025	0.153090232	0.152266743	0.154520471	0.152834305	0.152284867	0.15235722	0.152279034	0.153432604	0.152585827	0.154328782	0.155701641	0.152996271	0.153792422	0.153320852	0.153683597	0.16445393	0.152951883	0.15476433	0.15601256	0.152386868
270	0.158281129	0.155875393	0.15685225	0.158129344	0.167793069	0.155771908	0.156956744	0.155619121	0.163313857	0.156014818	0.156226982	0.159474533	0.156295771	0.155920557	0.156840584	0.156115345	0.155705474	0.156452298	0.155714142	0.156692417	0.157255365	0.155566034	0.156921015	0.155647675	0.156128003	0.159493995	0.158742908	0.158002647	0.15852924	0.156583394	0.155562319	0.158213131	0.156281228	0.155577606	0.155672105	0.155593542	0.156649172	0.155988992	0.157988426	0.159559954	0.156478018	0.157383873	0.156851781	0.157266714	0.169598368	0.156418728	0.158487378	0.159907879	0.155752749
271	0.161585803	0.159221301	0.160168811	0.161433597	0.171234	0.159230476	0.160273114	0.158998389	0.166673275	0.159363713	0.159565	0.162783774	0.159629208	0.159263529	0.160155142	0.159676302	0.159081334	0.16006652	0.159195009	0.160008764	0.160994159	0.159003238	0.160612376	0.159029165	0.159699235	0.162805388	0.162688929	0.161842484	0.162442276	0.160226293	0.158977896	0.16208714	0.159870786	0.158989892	0.159109754	0.159030883	0.159972441	0.159528219	0.161823918	0.163627793	0.160107789	0.161140325	0.160538312	0.16101361	0.175229448	0.160031237	0.162396754	0.164019136	0.159249173
272	0.164998465	0.162684144	0.163596944	0.164845993	0.174786764	0.162821936	0.163700883	0.162499564	0.170140638	0.16282975	0.163018372	0.166199926	0.163077281	0.162722971	0.163581022	0.163384635	0.1625785	0.163835606	0.162812084	0.163436882	0.164905825	0.162570592	0.164469719	0.162532828	0.163419366	0.166223945	0.166839027	0.165870134	0.166554251	0.164028231	0.162520555	0.166154199	0.163611751	0.162528773	0.162677454	0.16259835	0.163408469	0.163211788	0.165846537	0.167919029	0.163894764	0.165072233	0.164390194	0.164934652	0.181383202	0.163798406	0.166504541	0.168360696	0.162884012
273	0.168527735	0.166273949	0.167145866	0.168375188	0.17845969	0.166558586	0.167249235	0.166133386	0.17372415	0.16642297	0.166596877	0.169731373	0.166649663	0.16630884	0.167127406	0.167254775	0.16620762	0.167775111	0.166578158	0.166986025	0.169008715	0.166280015	0.168510313	0.166169439	0.167303058	0.169758081	0.171216682	0.170106354	0.170887773	0.168005408	0.166201775	0.170435936	0.167519156	0.166205655	0.166387098	0.166307857	0.166966648	0.167053681	0.170076924	0.172460507	0.16785486	0.169198357	0.168424601	0.169048399	0.188152251	0.167735762	0.170833257	0.172960628	0.16667038
274	0.172187516	0.17000742	0.170830665	0.172035152	0.18226582	0.170461684	0.170933194	0.169917981	0.177436767	0.170160107	0.170316724	0.173391528	0.17036236	0.170037706	0.170809321	0.171312358	0.169986634	0.171913008	0.170515495	0.170671364	0.17333673	0.170152005	0.17276575	0.169957192	0.171376432	0.173421268	0.175866992	0.174590248	0.175486002	0.172187149	0.170041162	0.174973361	0.171619888	0.170040003	0.170259129	0.170179889	0.170662417	0.171078605	0.174553929	0.177304871	0.172016821	0.173553481	0.172672929	0.173389203	0.19575414	0.17187122	0.175425875	0.177874347	0.170631203
275	0.175987072	0.173895408	0.174661276	0.175835186	0.186214057	0.174544658	0.174762658	0.173865006	0.18128727	0.174052029	0.174188486	0.177189386	0.174225824	0.173920345	0.174636664	0.175573252	0.173927096	0.176266458	0.174638088	0.174502881	0.177910278	0.174199558	0.177255179	0.173907785	0.175655625	0.177222537	0.180816389	0.179345038	0.18037434	0.176591361	0.174051214	0.179790721	0.175930513	0.17404423	0.174306517	0.174227435	0.17450591	0.175301913	0.17930064	0.182482558	0.176398231	0.178158488	0.177154218	0.177977717	0.204303075	0.176221911	0.180307693	0.183133754	0.174780845
276	0.179942433	0.177957516	0.178655235	0.179791407	0.19031926	0.178833008	0.178755081	0.177995891	0.185290461	0.178118369	0.178231123	0.181140354	0.178258755	0.177976183	0.178626892	0.180068773	0.178050191	0.18086993	0.178972768	0.178498216	0.182771961	0.178447185	0.182018012	0.178042734	0.180172605	0.181177369	0.186123321	0.184420612	0.185608449	0.181254355	0.178255277	0.184940611	0.18048403	0.178241496	0.178553696	0.178474988	0.178515106	0.179753678	0.184366586	0.188063012	0.181034606	0.183057205	0.181907613	0.182857171	0.214146822	0.180822225	0.185534106	0.188812385	0.179147011
277	0.184067493	0.182210619	0.182827693	0.183917781	0.194594379	0.183348548	0.182925544	0.18232904	0.18945922	0.182376032	0.182460981	0.18525781	0.182477279	0.182221954	0.182795092	0.184825593	0.182374124	0.185752727	0.183542461	0.18267261	0.187957886	0.182915868	0.187087685	0.182380518	0.184954589	0.185299199	0.191837156	0.18985917	0.191235367	0.186206975	0.182673363	0.190467497	0.18530852	0.182651658	0.18302159	0.182943515	0.182705527	0.184459534	0.189793667	0.194104836	0.185956126	0.188286762	0.186966326	0.188064196	0.22558533	0.185701403	0.191151923	0.19497228	0.18375336
278	0.188380704	0.186677659	0.18719899	0.188232868	0.199056293	0.188121739	0.18729428	0.186889709	0.193810419	0.186847995	0.18690019	0.189559422	0.186903197	0.186680379	0.187161503	0.189881744	0.18692384	0.190957044	0.18837935	0.187046537	0.193521157	0.187634798	0.192512998	0.1869465	0.19004047	0.189605788	0.198032866	0.195723777	0.197326169	0.191493867	0.187333173	0.19643819	0.190444236	0.187302174	0.18773929	0.187662182	0.187098068	0.189455885	0.195644454	0.2006986	0.191206379	0.193901923	0.192378796	0.193652755	0.239165723	0.190901537	0.197231845	0.201709881	0.188633212
279	0.19290296	0.191385014	0.191792321	0.192757696	0.203723847	0.19318827	0.191884355	0.191707122	0.198362978	0.191560681	0.191574135	0.194065129	0.191561492	0.191377571	0.191749204	0.195282467	0.191728185	0.196533433	0.193521288	0.191643359	0.199526473	0.192638082	0.198353032	0.191770042	0.195476587	0.194117177	0.204804234	0.202092257	0.203969386	0.197168741	0.192266959	0.20293551	0.19593925	0.192225	0.192740779	0.192665066	0.191716602	0.194785905	0.201996111	0.207959368	0.196837717	0.199969561	0.198203644	0.199688668	0.255717647	0.196473053	0.2038619	0.209148347	0.193825849
280	0.197656127	0.196360456	0.196632026	0.197514273	0.208616654	0.198585979	0.196719969	0.196812121	0.203136618	0.196541904	0.196509512	0.198795763	0.196478424	0.19634101	0.196582408	0.201076013	0.196817584	0.202535962	0.199008468	0.196487596	0.206043484	0.197961844	0.204671238	0.19688213	0.201312391	0.198854313	0.212253311	0.209048835	0.211261187	0.203289135	0.197508837	0.210049249	0.20184491	0.197453928	0.198062044	0.197988259	0.196586196	0.200495585	0.208932127	0.21601315	0.202906182	0.206561733	0.204503811	0.206242834	0.27622414	0.202469878	0.211137697	0.217422845	0.199373019
281	0.202667866	0.201639947	0.201749234	0.202530466	0.21375899	0.204365221	0.201832051	0.202245022	0.208155917	0.201827683	0.201740762	0.203777535	0.201687825	0.20160625	0.201692069	0.207327985	0.202231765	0.209038888	0.204894669	0.201610634	0.213170042	0.203653975	0.211556014	0.202323288	0.207615272	0.20384356	0.220528562	0.216713879	0.219340705	0.209934513	0.203103807	0.217908499	0.208231417	0.203033492	0.203750772	0.2036796	0.201738999	0.206647197	0.216571722	0.225046939	0.209488995	0.213779983	0.211366928	0.213415021	0.302468815	0.208966063	0.219197484	0.226735279	0.205330772
282	0.207969106	0.207264262	0.207178977	0.20783744	0.219177648	0.21058405	0.207255396	0.208051801	0.213448105	0.207458856	0.207306842	0.209039654	0.207227928	0.207213582	0.207113011	0.214115053	0.208015993	0.216129549	0.211242107	0.207047808	0.221022961	0.209769554	0.219112306	0.208139735	0.214464097	0.209114304	0.229811441	0.225232747	0.228377346	0.217198679	0.20910346	0.226669778	0.215181101	0.209014725	0.209861791	0.209794107	0.207211249	0.213313318	0.225058786	0.235292447	0.21667718	0.221745775	0.218896985	0.221324463	0.337003357	0.216048693	0.228209537	0.23733699	0.211764087
283	0.213596688	0.213282999	0.212963388	0.213472351	0.224903903	0.217314838	0.213031831	0.214288854	0.219045174	0.213485094	0.213254976	0.214616742	0.213145018	0.213211969	0.212887106	0.221534701	0.214225729	0.223920037	0.218128731	0.212841654	0.22975539	0.216377007	0.227476625	0.214388186	0.221959354	0.21470139	0.240347946	0.234799158	0.238599544	0.225202657	0.215571597	0.236542872	0.222799179	0.215460684	0.216463184	0.216400122	0.213046642	0.220585874	0.234584926	0.247069924	0.224587918	0.230618822	0.227229167	0.230127735	0.384022279	0.223829515	0.238400651	0.249577582	0.218754629
284	0.219593562	0.21975513	0.21915204	0.219478535	0.230973508	0.224645666	0.21921054	0.221023777	0.224983929	0.219965452	0.21964113	0.220548965	0.219493878	0.219659585	0.219063598	0.229707834	0.220927373	0.232550622	0.225649865	0.219042249	0.239562957	0.223559338	0.236822018	0.221136642	0.230225926	0.220645258	0.252462626	0.245664504	0.250307118	0.234098663	0.222585275	0.247801528	0.231216785	0.222447476	0.223637504	0.223580536	0.219296702	0.228578452	0.245398602	0.260809852	0.233368286	0.240603704	0.236534741	0.240025152	0.449873256	0.232448346	0.250068352	0.263929903	0.226402558
285	0.22601017	0.226751405	0.225803731	0.225906928	0.237427574	0.232684875	0.225849824	0.228338362	0.231306983	0.226970775	0.226532211	0.22688326	0.226339912	0.226626156	0.225700876	0.238786214	0.228201178	0.242199068	0.233923367	0.225709036	0.250699095	0.231418284	0.247370846	0.228467411	0.239420903	0.226993182	0.26659068	0.258160004	0.263899891	0.244080644	0.230238499	0.260808556	0.240599387	0.230067869	0.231485887	0.231436938	0.226022698	0.237433062	0.257826899	0.277100976	0.243205271	0.251966248	0.247033641	0.251276648	0.543168457	0.242082341	0.263609214	0.281044802	0.234832103
286	0.23290685	0.234358509	0.232989582	0.232818505	0.244314072	0.241568986	0.233020162	0.236333798	0.238064473	0.234587856	0.234009869	0.233675445	0.233762818	0.234197033	0.232869534	0.248965472	0.236146292	0.25309698	0.243098614	0.232913982	0.263502162	0.240081543	0.259417319	0.236482358	0.249747273	0.233801401	0.28333539	0.27273614	0.279928822	0.255402827	0.238648645	0.276060579	0.251161532	0.238437593	0.240135207	0.240096823	0.233298949	0.247331946	0.272314266	0.296776695	0.254343376	0.265062531	0.259016667	0.264229909	0.670785935	0.252962273	0.279569425	0.301849737	0.244201278
287	0.240355542	0.242682425	0.240795387	0.240286025	0.251688704	0.251469865	0.240806513	0.245135056	0.245315136	0.2429228	0.242173514	0.240991663	0.241859474	0.242476462	0.240654698	0.260497756	0.244884992	0.265546193	0.253364789	0.24074398	0.278424309	0.249709215	0.273350982	0.245307337	0.261467326	0.241136584	0.303533772	0.290006271	0.299153888	0.268398601	0.247962069	0.294238146	0.263181429	0.247700817	0.249744439	0.249720011	0.241215369	0.258508915	0.289465293	0.321016435	0.267102424	0.280369978	0.272868587	0.27935043	0.820596826	0.265388829	0.298702	0.327665031	0.254710945
288	0.248442869	0.251854315	0.249325781	0.248397173	0.259616565	0.262607006	0.249312413	0.254898487	0.253128336	0.252106896	0.251145614	0.248911021	0.250749023	0.25159331	0.249160134	0.273713328	0.254570027	0.279946679	0.264965089	0.249305113	0.296080502	0.260504887	0.289696664	0.255099871	0.274925522	0.249078507	0.328366494	0.31082036	0.322641364	0.283512668	0.258363787	0.316290227	0.277025815	0.258039606	0.26051561	0.260509703	0.249881966	0.271268715	0.31011702	0.351511633	0.281907899	0.298540151	0.289107433	0.297272579	0.941418155	0.279760388	0.322062964	0.360391833	0.266620335
289	0.257273557	0.262037446	0.258709003	0.257258066	0.268173811	0.275262796	0.258664653	0.265820968	0.261586167	0.262303545	0.261077876	0.257528466	0.260578789	0.261707796	0.258512959	0.289048254	0.265393419	0.296832787	0.278214522	0.258727538	0.317313321	0.272729311	0.309167028	0.266058389	0.290577925	0.257722958	0.359500268	0.33636241	0.351890969	0.301343041	0.270089305	0.343545519	0.293182069	0.269685465	0.272707288	0.272726106	0.259434025	0.286011716	0.335434523	0.390666677	0.299330489	0.320468585	0.308436191	0.31886714	0.985080079	0.296609077	0.351137189	0.402729907	0.280266605
290	0.266975182	0.273437065	0.269103598	0.266998111	0.277449845	0.289804742	0.26901985	0.278153032	0.270786308	0.273718115	0.272160019	0.266958746	0.271532649	0.273021088	0.26887025	0.307085215	0.277599103	0.316926674	0.293525949	0.269172366	0.343287205	0.286720282	0.332739673	0.278435518	0.309035592	0.267185762	0.399269005	0.368286764	0.389003961	0.32270294	0.283441759	0.377864679	0.312305571	0.28293605	0.286654186	0.28670625	0.270039408	0.30327026	0.367044947	0.441789607	0.320144396	0.347395907	0.331818696	0.345339408	0.966276669	0.316653938	0.388005352	0.458340901	0.296093502
291	0.277703683	0.286312481	0.280706412	0.277775662	0.287549547	0.306713612	0.280572272	0.292215191	0.280845112	0.286609992	0.284630428	0.277340925	0.283841189	0.285787006	0.280426926	0.328605536	0.291498585	0.341205902	0.311443222	0.280839883	0.375600109	0.302917767	0.361751767	0.29255458	0.331119893	0.277607353	0.450782939	0.408856381	0.436812929	0.34869848	0.298813451	0.421780024	0.335279911	0.298176134	0.302791899	0.30288901	0.28190732	0.323755039	0.407174927	0.508925133	0.345400864	0.381025519	0.360573074	0.378344473	0.919940001	0.340868247	0.435475368	0.531460024	0.314687915
292	0.289650774	0.300993784	0.293763512	0.289785644	0.298596009	0.326622482	0.29356452	0.308420633	0.291901605	0.301309253	0.298790835	0.2888444	0.297795662	0.300328227	0.293426519	0.354658966	0.307492708	0.370990383	0.332687005	0.293980806	0.416394706	0.321898874	0.398008295	0.308832559	0.357936215	0.289158884	0.517643727	0.460989858	0.498748397	0.380825306	0.316715842	0.47847765	0.363296058	0.315906815	0.321691295	0.321849935	0.29530032	0.348418014	0.458703874	0.595333543	0.376521132	0.423632231	0.396479664	0.420098109	0.863109981	0.370566238	0.496961284	0.624587437	0.336830232
293	0.303052297	0.31790154	0.308582816	0.303268158	0.310733006	0.350361624	0.308299859	0.327302034	0.304121571	0.31823625	0.315023504	0.301675523	0.313764321	0.317055342	0.308173624	0.386633886	0.326097333	0.408015915	0.358206644	0.308909325	0.468330689	0.344418578	0.443822207	0.327807199	0.390946249	0.302048942	0.602275836	0.527828488	0.577688591	0.421037419	0.337814774	0.551081207	0.397926003	0.336779837	0.344098544	0.344341796	0.310548263	0.378518544	0.524762259	0.698565198	0.415368599	0.477994454	0.441825296	0.473330034	0.802891735	0.407476942	0.575375776	0.732033662	0.363550494
294	0.31819878	0.337571887	0.325550255	0.318519383	0.32412752	0.379008615	0.325157979	0.349545046	0.317702363	0.337926524	0.33381318	0.316085878	0.332213288	0.336491174	0.325049834	0.426300348	0.347975503	0.454427529	0.389234565	0.326019815	0.534078269	0.371457091	0.501791668	0.35017079	0.43200499	0.316531947	0.701205443	0.61092376	0.672325737	0.47168493	0.362972806	0.64006285	0.441145387	0.361639026	0.370981655	0.371341744	0.328066142	0.415674671	0.607011083	0.802154741	0.464213938	0.54673854	0.499198341	0.540702499	0.742251654	0.453739583	0.669591171	0.83180688	0.396184104
295	0.33544641	0.360682033	0.345146725	0.335902932	0.338971011	0.41391465	0.344611522	0.376019693	0.332877085	0.361055982	0.355769639	0.332380647	0.353728141	0.359295616	0.344530501	0.475700792	0.373967936	0.512452053	0.427301325	0.345804411	0.614482085	0.404251843	0.57375383	0.376801636	0.483217544	0.332916625	0.798142151	0.705696068	0.770590964	0.534980948	0.393283017	0.737599996	0.49512533	0.391554028	0.403562053	0.40408318	0.348372719	0.461805301	0.701256437	0.876520115	0.525298122	0.630125825	0.570493808	0.622777585	0.682402824	0.511583	0.76791927	0.893296493	0.43637434
296	0.355227425	0.388069401	0.367963557	0.355860639	0.355478519	0.456642359	0.367241184	0.407794401	0.349917436	0.388459459	0.381645916	0.350926353	0.379031899	0.386284757	0.367200142	0.536595269	0.405108064	0.583220495	0.474114455	0.368869022	0.704400464	0.444266496	0.657959415	0.408777388	0.546278524	0.351573797	0.866439187	0.795838978	0.848030407	0.611297919	0.430062354	0.823080328	0.561383119	0.427816568	0.443285	0.444025117	0.372107006	0.518740533	0.791803719	0.90244349	0.599365582	0.721402308	0.654186307	0.713580092	0.623849543	0.582165051	0.846167597	0.904895097	0.485898021
297	0.378052906	0.420716978	0.394703742	0.378915472	0.373882614	0.508649716	0.393737057	0.446081701	0.369131509	0.421115178	0.412330598	0.372152585	0.408979725	0.418418513	0.393754062	0.608932084	0.442574737	0.664085579	0.531068948	0.395934443	0.788544451	0.492968066	0.744713771	0.447317921	0.620719463	0.372937979	0.889691319	0.857510205	0.883774644	0.695735789	0.47471212	0.872829751	0.638665886	0.471811878	0.491603733	0.492631044	0.400027558	0.587058042	0.854968866	0.886905038	0.682539639	0.803212864	0.741006438	0.796681179	0.566758069	0.662915005	0.88311787	0.8799556	0.546031106
298	0.404501562	0.459660912	0.426153196	0.405659817	0.394419426	0.57041799	0.424871274	0.492023654	0.390853736	0.460050998	0.448781738	0.396543467	0.444501716	0.456716083	0.424971134	0.687920765	0.487499051	0.744952078	0.59799063	0.427805841	0.845689717	0.551170306	0.815387886	0.493563144	0.700737171	0.397498331	0.874319849	0.877222081	0.878051954	0.77471285	0.528271238	0.879646136	0.719490805	0.524600862	0.549342719	0.550717295	0.432974704	0.663635092	0.876511319	0.847736201	0.762697999	0.854319674	0.812639616	0.850726318	0.51111064	0.743859716	0.878379967	0.835919274	0.615998476
299	0.435168973	0.5057064	0.463071224	0.436702392	0.417299256	0.639684724	0.461393069	0.546117595	0.415416203	0.506058966	0.491813251	0.424600599	0.486412741	0.501991945	0.461608257	0.761510248	0.540439959	0.808737272	0.670864441	0.465256973	0.86411815	0.617597523	0.85266621	0.547982446	0.773014121	0.425760192	0.836143688	0.86119615	0.845380001	0.829669251	0.590360185	0.854700683	0.788803592	0.585920672	0.615300625	0.617026713	0.471734866	0.738806676	0.861853807	0.797078859	0.821685784	0.865921487	0.851463846	0.865490958	0.45681652	0.807978954	0.84628184	0.782829251	0.690416866
300	0.470544952	0.558808557	0.505931488	0.472539708	0.442654979	0.709324009	0.50378045	0.607096783	0.443090276	0.559076521	0.541617075	0.456755708	0.5349819	0.554275561	0.504149668	0.813599636	0.600345897	0.840875708	0.73988694	0.508756422	0.84892142	0.686847612	0.853360686	0.6092316	0.821244152	0.458154795	0.786538629	0.823575132	0.798670637	0.849415642	0.657445679	0.812117065	0.830591948	0.652509478	0.684248342	0.686200504	0.516724924	0.797433348	0.825021334	0.741108602	0.846667532	0.845725737	0.853589814	0.84753428	0.403812093	0.840595632	0.799872341	0.725713013	0.757773488
301	0.510758516	0.616980054	0.554401276	0.513288554	0.47045476	0.767313614	0.551739864	0.670350017	0.47397679	0.61710006	0.596877509	0.493191105	0.589119529	0.611771876	0.552300676	0.833928489	0.663033264	0.839471581	0.791374399	0.55791863	0.812735362	0.748430596	0.827180965	0.672561919	0.836699307	0.494854156	0.731418108	0.774795545	0.745048262	0.837213287	0.721292566	0.760668504	0.83881607	0.716512704	0.745915491	0.747803668	0.567371044	0.826964431	0.776671483	0.682964461	0.838797079	0.806616105	0.828355149	0.809705554	0.352183563	0.839617179	0.746404486	0.667121902	0.803937914
302	0.555168502	0.6751889	0.606591006	0.558257762	0.500384348	0.801861497	0.603479425	0.727330569	0.507839573	0.675097932	0.653735945	0.533548353	0.645379193	0.669764404	0.604251305	0.824191678	0.720457367	0.813192431	0.815163567	0.610720587	0.765307028	0.790182789	0.78541925	0.72928598	0.822887066	0.535472059	0.673924682	0.720483929	0.688263182	0.803836919	0.770425813	0.704962686	0.819416715	0.766668756	0.788216882	0.789692039	0.621259088	0.82551937	0.722590181	0.624283775	0.808174309	0.757564506	0.787129272	0.761353979	0.302308569	0.813617856	0.689692662	0.608360756	0.82055855
303	0.60176135	0.725271162	0.658225856	0.605324441	0.531679379	0.808560694	0.654887315	0.767821493	0.543849337	0.724941585	0.705271858	0.576475667	0.697321468	0.720389506	0.655845177	0.79354091	0.762564797	0.772115476	0.810831078	0.662665095	0.712058369	0.805171124	0.735337276	0.769174793	0.789537622	0.578602906	0.615682151	0.663623524	0.630287483	0.758560352	0.795654902	0.647445173	0.782536416	0.793532419	0.80402774	0.804884533	0.673327968	0.800598283	0.665843822	0.565859424	0.764501109	0.703430092	0.737344236	0.707593143	0.255015617	0.772702095	0.631744972	0.550056328	0.80976893
304	0.64676748	0.758715949	0.702854328	0.650557869	0.562994018	0.791394994	0.699676773	0.78514798	0.580348607	0.758182202	0.743277662	0.619248297	0.736938131	0.755153167	0.700733559	0.750532957	0.782243493	0.722921965	0.785129816	0.707079078	0.656006885	0.794945806	0.680989663	0.785723317	0.744894833	0.621444991	0.557538636	0.605856162	0.572165022	0.706925954	0.795170491	0.589436074	0.735804057	0.794745331	0.794607591	0.794858943	0.716457056	0.761105101	0.608124082	0.508101633	0.713787171	0.64692513	0.683156291	0.651272447	0.211619949	0.723598596	0.573625737	0.492534546	0.779492443
305	0.684968866	0.770655214	0.733667801	0.688588335	0.592364479	0.757865511	0.731088917	0.77923752	0.61475412	0.770001061	0.761747373	0.657763313	0.757888811	0.768835074	0.732112077	0.700669797	0.778695755	0.669429706	0.745926656	0.737093111	0.598835283	0.766209712	0.624652952	0.779085688	0.694053036	0.659819616	0.499949239	0.548060638	0.514451447	0.652046465	0.77376234	0.531636814	0.68373797	0.774692277	0.766493837	0.766277174	0.743832858	0.713349155	0.550337996	0.451254889	0.65942023	0.589552563	0.626898202	0.593975214	0.173712858	0.670155096	0.515901106	0.436007506	0.737385965
306	0.711097447	0.761752073	0.746315845	0.714105293	0.617382001	0.714419731	0.744643516	0.754984519	0.643808938	0.761066223	0.759524216	0.687308639	0.758338337	0.761623456	0.745506375	0.647147362	0.756332181	0.613838745	0.698887353	0.748538524	0.541470428	0.725812971	0.567611489	0.754282328	0.639953935	0.688984646	0.443203844	0.490723469	0.457479126	0.595710679	0.73824809	0.474446587	0.628941237	0.740111278	0.726528247	0.725987411	0.751919302	0.661076608	0.492986499	0.395559321	0.603350314	0.532135086	0.569888221	0.536569854	0.142610702	0.614588452	0.458907931	0.380729013	0.688545982
307	0.721857834	0.736587772	0.740690084	0.723935101	0.635623265	0.665181073	0.739999327	0.718414609	0.664286235	0.735928561	0.739932469	0.70407318	0.741057788	0.737817434	0.74063012	0.59177925	0.721108027	0.557377968	0.647380911	0.741619876	0.484426144	0.678490607	0.510564216	0.717337502	0.584263046	0.705179707	0.387601178	0.434169056	0.401540815	0.538903454	0.694086305	0.418165201	0.572881562	0.696563841	0.679498895	0.678737841	0.741723637	0.606418607	0.43639903	0.341422199	0.546657014	0.47513656	0.512843366	0.479541381	0.118698971	0.558137299	0.402938637	0.327169574	0.6359301
308	0.716824032	0.700241205	0.719708428	0.717857374	0.645209931	0.612716527	0.719890949	0.6741806	0.673880675	0.699634943	0.707720605	0.706359565	0.710595452	0.702451462	0.720278575	0.535697363	0.677789911	0.500813649	0.593501624	0.719494505	0.42809211	0.627219723	0.453982666	0.672858263	0.528017687	0.706813462	0.333618081	0.378759545	0.347064987	0.482247973	0.644849635	0.363178316	0.516471873	0.647728047	0.628427064	0.627516478	0.716900395	0.550708846	0.380935981	0.289569047	0.490017589	0.418929334	0.456243713	0.423268438	0.101367181	0.501573593	0.348417188	0.276158338	0.58138295
309	0.698077671	0.656758056	0.687468395	0.698134846	0.645242447	0.558574863	0.688343366	0.625341886	0.671815982	0.656211391	0.667166086	0.69489321	0.671287422	0.65964969	0.688514357	0.479584444	0.629571143	0.444646301	0.538505221	0.686350128	0.372885878	0.573802003	0.398272462	0.623860335	0.471849492	0.694720849	0.282077994	0.325054052	0.294783568	0.426187236	0.592726953	0.310121494	0.460280909	0.595865552	0.575144185	0.574132353	0.681740032	0.494743444	0.327147243	0.241183116	0.433894762	0.363945479	0.4004951	0.368174621	0.0893623	0.445400078	0.296066612	0.228997311	0.526006589
310	0.66881466	0.608849623	0.647618627	0.668052251	0.635911712	0.5037003	0.649016103	0.573796496	0.658842531	0.60836093	0.621322223	0.672025416	0.626321234	0.612213843	0.649007806	0.423930074	0.5784452	0.389328415	0.48316218	0.645817826	0.319438413	0.519333965	0.343962926	0.572212653	0.416231111	0.671319375	0.234270817	0.273984176	0.245876604	0.371186751	0.539053763	0.260044532	0.404766825	0.542357345	0.520765995	0.519686739	0.639755167	0.439056189	0.275948816	0.19786623	0.378745019	0.310861633	0.346119313	0.314913575	0.081344085	0.390068688	0.247055708	0.187344053	0.470485564
311	0.632052442	0.558295543	0.602824144	0.630639322	0.618188279	0.448758595	0.604610161	0.52079044	0.636610874	0.557860178	0.57222596	0.640502939	0.577843089	0.561987589	0.604457453	0.369255585	0.525719221	0.335462274	0.428051226	0.600514733	0.268747782	0.464565402	0.291880146	0.519143069	0.36169402	0.639373916	0.191831907	0.226919911	0.201920102	0.317922018	0.484723481	0.214426829	0.350485671	0.488124998	0.466054258	0.464932394	0.593414478	0.38415867	0.228694723	0.161226399	0.325210082	0.260742676	0.29392838	0.264517672	0.076210863	0.336178775	0.202953203	0.152704852	0.415363564
312	0.590172943	0.506258102	0.554890144	0.588252609	0.593466305	0.39432118	0.556965511	0.467163435	0.607092408	0.505870865	0.52120837	0.60279314	0.527257945	0.510173902	0.556696821	0.316281648	0.472268766	0.28396082	0.373737674	0.552200958	0.222247754	0.410089265	0.243269072	0.465481147	0.308995117	0.601340066	0.156329314	0.185538322	0.164561089	0.26743038	0.4303885	0.174955434	0.298256208	0.433834343	0.411607252	0.410463589	0.544359997	0.33070979	0.187057389	0.132251372	0.274273291	0.215083618	0.245150027	0.218453161	0.07314711	0.284638237	0.165411683	0.125797796	0.36121866
313	0.544887337	0.453565328	0.50505038	0.542572895	0.563196889	0.341056592	0.507340408	0.413578332	0.5721072	0.453221597	0.469198558	0.560798753	0.475540051	0.457624434	0.506978519	0.266085139	0.418772513	0.236156277	0.320958733	0.502078719	0.18163386	0.356538159	0.19975378	0.411885935	0.259266132	0.559100453	0.128588045	0.151331726	0.134868956	0.22117459	0.376664603	0.142943814	0.249295088	0.380101509	0.358056758	0.356912728	0.493716844	0.279683599	0.1525495	0.110805765	0.227344015	0.175580122	0.201397895	0.178417459	0.071570842	0.236773644	0.135523278	0.10618755	0.308844689
314	0.497408074	0.400900898	0.454193456	0.494788597	0.528686677	0.289905678	0.456638518	0.360704692	0.53314662	0.400597486	0.416921643	0.515909221	0.423435492	0.405031168	0.456202128	0.220161934	0.365895897	0.19372068	0.27078775	0.451017345	0.148324538	0.304764145	0.162968205	0.359029474	0.214051206	0.514026741	0.108253297	0.124916007	0.112778796	0.180858937	0.324313525	0.118679639	0.205210169	0.327675698	0.306248086	0.305130205	0.442310808	0.232472097	0.125830825	0.095745526	0.186119645	0.143538018	0.164317643	0.145772221	0.07106926	0.194254625	0.113252829	0.092569933	0.259404337
315	0.448655451	0.348999496	0.403067662	0.445804849	0.491033416	0.242194636	0.405614441	0.309407133	0.491383507	0.348735185	0.365095176	0.469166866	0.371659434	0.3531221	0.405119938	0.180203496	0.314480938	0.15820935	0.224693815	0.399757305	0.122788166	0.255980214	0.133873784	0.307784511	0.175033345	0.467149156	0.094080156	0.105740236	0.097210544	0.147858455	0.274408993	0.101330333	0.167649502	0.277608345	0.257383741	0.256326423	0.390869325	0.190752681	0.106392398	0.085573818	0.152059972	0.119235637	0.134909374	0.120886574	0.071343124	0.15864225	0.097539141	0.083453645	0.214445002
316	0.399419269	0.298804115	0.352443755	0.396405496	0.451159732	0.199554169	0.355036302	0.260871255	0.447764384	0.298579833	0.314590422	0.421421041	0.321058353	0.302819986	0.35449981	0.147558761	0.265678371	0.130431463	0.184352477	0.34907329	0.104385045	0.211746692	0.112335145	0.259348175	0.143462202	0.419310902	0.084573838	0.092489974	0.086681098	0.12262153	0.228389916	0.089472487	0.137691668	0.231315554	0.213015671	0.212059659	0.340184415	0.156030885	0.092939115	0.078942665	0.125768377	0.101874137	0.113084197	0.103035538	0.072173834	0.130759539	0.086902168	0.07757249	0.175634275
317	0.350499954	0.251584521	0.303265752	0.347395405	0.409870901	0.163567166	0.305836447	0.216629546	0.403103882	0.2514029	0.266568407	0.373458771	0.272751051	0.255366239	0.305276139	0.122640508	0.220990137	0.110065517	0.151168848	0.299925052	0.091730505	0.173716951	0.097230569	0.215262184	0.119587884	0.371299402	0.07841919	0.083657304	0.079799041	0.104468056	0.18792423	0.081641747	0.115341582	0.190460297	0.174800688	0.173984173	0.291261873	0.129024992	0.083959549	0.074828646	0.106709353	0.090010247	0.097750015	0.090801355	0.073405055	0.110300267	0.079943496	0.073992104	0.144219284
318	0.302858281	0.208915925	0.256770987	0.299749941	0.367944196	0.135155189	0.259234726	0.178330544	0.358205857	0.208779855	0.222516928	0.326151762	0.228185133	0.212316046	0.258672699	0.104741037	0.182070296	0.095884172	0.12566169	0.253572928	0.083328555	0.143071175	0.087045923	0.177171758	0.102566739	0.323993332	0.074646325	0.077982828	0.075509026	0.09200087	0.154446268	0.076678135	0.099574021	0.156510442	0.14394141	0.143285734	0.245421871	0.109319339	0.078180849	0.072511736	0.093547184	0.082176441	0.087396213	0.082701755	0.074924115	0.096045481	0.075599028	0.072057233	0.120450474
319	0.25772047	0.172394237	0.214486122	0.254716386	0.326220123	0.114141331	0.216743737	0.147216141	0.31397664	0.172304464	0.184064776	0.280578037	0.188988261	0.175279534	0.21620599	0.092457211	0.150228841	0.0863719	0.107226616	0.211561202	0.077960977	0.119974197	0.080411153	0.146295351	0.090948744	0.278482981	0.072575355	0.074553884	0.07306817	0.083731967	0.128553389	0.073756071	0.088893636	0.130133299	0.120637018	0.120137664	0.204245762	0.095641341	0.074677678	0.071483694	0.084776232	0.077212232	0.08064088	0.077548768	0.076650076	0.086479539	0.073119231	0.07130305	0.103491031
320	0.216571847	0.143063381	0.17797527	0.213795901	0.285685664	0.099389906	0.179933737	0.123542048	0.271519926	0.14301647	0.15248747	0.238082045	0.156512051	0.145365897	0.179446147	0.084322222	0.125834934	0.080223522	0.094509047	0.175443885	0.074759646	0.103520069	0.076308322	0.122852302	0.083293778	0.236125376	0.07172821	0.072735748	0.071956479	0.078468052	0.109710555	0.072300241	0.081911336	0.110863537	0.104008417	0.103640608	0.169244177	0.086493356	0.072806514	0.07138252	0.079155398	0.074298288	0.076452318	0.074500245	0.07852557	0.080292903	0.071979681	0.071397787	0.091903048
321	0.180903831	0.12098085	0.148333663	0.178471895	0.247493513	0.089452329	0.149936501	0.106554442	0.232135192	0.120969574	0.128189181	0.200148817	0.131295604	0.122721915	0.149517573	0.079158465	0.108229671	0.076469901	0.086063683	0.146266216	0.073105098	0.092308106	0.074010347	0.106060116	0.0784707	0.198408283	0.071756363	0.072069745	0.07179551	0.075343056	0.09666051	0.071893237	0.077565659	0.097477992	0.092663675	0.092396001	0.141318484	0.080609756	0.072102608	0.071944121	0.075776559	0.072849042	0.074093177	0.072954817	0.080509425	0.076512084	0.071798792	0.072099555	0.084274502
322	0.15178979	0.105272957	0.125769058	0.149774711	0.212887507	0.083006613	0.127015689	0.094919345	0.197182973	0.105288634	0.110584218	0.168089053	0.11288105	0.106542206	0.126670947	0.076105327	0.096118019	0.07442115	0.0806806	0.124162353	0.07255556	0.084949114	0.073000987	0.094574427	0.075659892	0.166625208	0.072409558	0.072226687	0.072313463	0.073742906	0.087969181	0.072235299	0.075094834	0.088541024	0.085208962	0.085013485	0.120413567	0.077045017	0.072232464	0.072979031	0.073995173	0.072446227	0.07304009	0.072483249	0.082572889	0.074443915	0.072302503	0.073234821	0.079471339
323	0.129479624	0.094587422	0.109559296	0.127887895	0.182996607	0.079043038	0.110497123	0.087249066	0.167785561	0.094622334	0.09843492	0.14260889	0.100094261	0.095497077	0.110219679	0.074556523	0.088101589	0.073589682	0.077471793	0.108349072	0.072795038	0.080337083	0.072911997	0.087012231	0.074284084	0.141444625	0.073508909	0.072971036	0.073316025	0.073231888	0.082410163	0.073112037	0.073961858	0.082807058	0.080529004	0.080384762	0.10560515	0.07513111	0.072957444	0.074351727	0.073354677	0.072790527	0.07291986	0.072778429	0.084696327	0.073598566	0.073294878	0.074679401	0.076674989
324	0.113339111	0.087593003	0.098442445	0.112119109	0.158541526	0.076846077	0.099139439	0.082414671	0.144472949	0.08764143	0.090374433	0.123548845	0.091564783	0.088242276	0.098915904	0.074082725	0.083020642	0.073627878	0.075813045	0.097539845	0.07359785	0.077678023	0.073480191	0.082254769	0.073933758	0.122664228	0.074926721	0.074134787	0.074664542	0.073498794	0.079077212	0.074370519	0.073784865	0.079349699	0.077821641	0.077713833	0.095562712	0.074396674	0.074107335	0.075965354	0.073529168	0.073668244	0.07346575	0.073621052	0.086866726	0.073626853	0.07463611	0.076344552	0.075310581
325	0.102200056	0.083236831	0.091114814	0.10127364	0.139617255	0.07591074	0.091634902	0.07959781	0.127015769	0.083294847	0.085256459	0.110022058	0.086110732	0.083700306	0.091451515	0.074376451	0.080028107	0.074286764	0.075261711	0.090437593	0.074802746	0.076412828	0.074517437	0.079492749	0.074315532	0.109369062	0.076571569	0.075597777	0.076259757	0.074320902	0.077331084	0.075901306	0.074290252	0.077514807	0.076522013	0.076440178	0.089017765	0.074504558	0.075560403	0.077750678	0.074285319	0.074926684	0.074487073	0.074854421	0.089075814	0.074278673	0.076226116	0.078166918	0.07496921
326	0.094829155	0.08077059	0.086525899	0.094121509	0.125697137	0.075879958	0.086918796	0.078227947	0.114574426	0.080835456	0.082247343	0.100833573	0.08286196	0.081101697	0.086764457	0.075219854	0.078533158	0.075390209	0.075503991	0.086010554	0.076295542	0.076147422	0.075890627	0.07816195	0.075221626	0.100358285	0.078378811	0.077274852	0.078031416	0.07554069	0.076723499	0.077626871	0.075284357	0.076844054	0.076232126	0.076168757	0.084989769	0.075215703	0.077230379	0.079659031	0.0754581	0.076457693	0.07584892	0.076367558	0.09131883	0.07537709	0.077994054	0.080102071	0.0753608
327	0.090195252	0.079644785	0.083886209	0.089645608	0.115947067	0.07648921	0.084188322	0.077883662	0.10611616	0.079714564	0.080734447	0.094873412	0.081178153	0.079881504	0.084054746	0.076452191	0.078099755	0.076808207	0.076307737	0.08348638	0.077991887	0.076589639	0.077501412	0.0778455	0.076498726	0.094528229	0.080301084	0.07910328	0.079927949	0.077041828	0.076922105	0.07949019	0.076624275	0.076997686	0.076656908	0.07660669	0.082750236	0.076353674	0.079053698	0.081655029	0.07692566	0.078181391	0.077451611	0.078078484	0.093593259	0.076791506	0.079887907	0.082117804	0.076270937
328	0.087518994	0.079472428	0.082634439	0.087082466	0.109436877	0.07755264	0.082871783	0.078267902	0.100641849	0.079545716	0.080286247	0.091243938	0.080608117	0.079641893	0.08275302	0.07796052	0.078420541	0.078449325	0.077509945	0.082317017	0.079832581	0.077534031	0.079280659	0.078249558	0.078039079	0.090992318	0.082305618	0.081039292	0.081913573	0.078742492	0.077692925	0.081451581	0.078209537	0.077736471	0.077588852	0.077548023	0.081783917	0.077794557	0.080985996	0.083714466	0.078602287	0.080041767	0.079225069	0.079929691	0.095898512	0.07843007	0.08187158	0.084192183	0.077549092
329	0.086240317	0.079979066	0.082372675	0.085884689	0.105339664	0.078939207	0.082563853	0.079170513	0.097338264	0.080054831	0.080596634	0.089282119	0.080831815	0.080100692	0.082455657	0.079665108	0.07927798	0.080249079	0.07899565	0.08211398	0.081776193	0.078835715	0.081179809	0.079166266	0.079766621	0.089097552	0.084369952	0.083052537	0.083963668	0.080585043	0.078870845	0.083483622	0.079969239	0.078891556	0.078881623	0.078847516	0.081725505	0.079450875	0.082996495	0.085821018	0.080427572	0.081999675	0.081120058	0.081880958	0.098235403	0.080228002	0.083920221	0.086310506	0.07908907
330	0.085960247	0.080969372	0.082816939	0.085662367	0.103007891	0.08055608	0.082975286	0.080442422	0.09560008	0.081046864	0.081447457	0.088513465	0.081621053	0.081057	0.082874621	0.08150965	0.08051772	0.082162129	0.080683414	0.082600009	0.083793991	0.080392046	0.083164997	0.080448198	0.081627679	0.088376865	0.086478975	0.085122246	0.086061576	0.082529072	0.080338881	0.085567648	0.081853418	0.080343306	0.080431554	0.080402273	0.082314299	0.081260777	0.085064119	0.08796397	0.082359108	0.08402803	0.083102225	0.083904427	0.10060579	0.082139747	0.086017011	0.088463225	0.080815657
331	0.086401866	0.082308468	0.083770341	0.086144845	0.101973883	0.082339306	0.083905501	0.081980796	0.095002284	0.082387144	0.082687934	0.088608837	0.082818032	0.082372061	0.083810171	0.083455727	0.082033288	0.084157757	0.082517205	0.083582911	0.085866901	0.082132253	0.085213557	0.081993664	0.083585681	0.088506238	0.088623132	0.087234913	0.08819666	0.084547324	0.082016346	0.087691623	0.08382811	0.082009204	0.082167174	0.082141351	0.083369727	0.083181946	0.087175148	0.090136844	0.084368234	0.086108908	0.085148561	0.085981634	0.103012426	0.084134435	0.0881512	0.090644674	0.082677176
332	0.087341995	0.083888189	0.085074841	0.087114067	0.101855236	0.084237789	0.085193479	0.08370319	0.095199704	0.083967684	0.08419716	0.089302238	0.084296206	0.0839346	0.085101961	0.085472885	0.083739317	0.086211733	0.084452334	0.08490844	0.087980091	0.083999724	0.087307755	0.083721135	0.085611665	0.089223882	0.090795283	0.089380202	0.090360906	0.08661836	0.083838626	0.089846396	0.085866462	0.08382316	0.084031311	0.084008002	0.084746928	0.08518078	0.089319072	0.092334991	0.086432381	0.088228409	0.087241057	0.088098238	0.10545852	0.086187714	0.090314681	0.09285087	0.084632453
333	0.088632799	0.085637478	0.086626307	0.088425649	0.10238955	0.086218287	0.086733102	0.085555524	0.095960295	0.085717551	0.085895664	0.090416904	0.085972374	0.085671506	0.086644314	0.087541718	0.085579799	0.088308827	0.086459843	0.086474985	0.090124637	0.085957528	0.089436721	0.085577141	0.087687228	0.09035588	0.092991674	0.091552206	0.092549968	0.088728826	0.085763457	0.092026861	0.087951485	0.08574193	0.085986659	0.085965201	0.086350548	0.087235761	0.091489869	0.094556344	0.088537434	0.09037823	0.089368657	0.090245646	0.107947991	0.088284272	0.092503047	0.095080196	0.086654889
334	0.090175702	0.087509295	0.088355662	0.089983367	0.10339731	0.0882592	0.088453964	0.087502124	0.097126916	0.087589787	0.087730803	0.091834381	0.087791405	0.08753437	0.088367122	0.08965001	0.087517763	0.090439652	0.088521037	0.088215154	0.092295436	0.08798157	0.091594028	0.087526416	0.08980083	0.091785738	0.095210746	0.093747885	0.094761881	0.090870607	0.087763135	0.094230525	0.0900726	0.087737147	0.088008872	0.087988792	0.088117367	0.089333237	0.093684417	0.096800529	0.090674763	0.092553695	0.091524808	0.092418981	0.110485415	0.090414667	0.094714288	0.097332596	0.088727389
335	0.09190153	0.089470884	0.090214543	0.091719714	0.10475071	0.090345941	0.090306768	0.089518346	0.098588313	0.089551697	0.089665838	0.093471356	0.089714799	0.089489461	0.090221296	0.091789859	0.089527642	0.092598328	0.090623401	0.090081774	0.09448968	0.09005548	0.093775916	0.089544609	0.091945058	0.093431545	0.097452268	0.095965921	0.096996112	0.093038734	0.089818714	0.096456472	0.092223073	0.089789391	0.090081398	0.090062361	0.090003156	0.091464288	0.095901342	0.099068197	0.092839029	0.094752301	0.09370566	0.094615598	0.113075954	0.092572979	0.096947842	0.099608967	0.090838576
336	0.093761135	0.091499302	0.092168724	0.09358673	0.106358176	0.092468726	0.092256615	0.09158713	0.100265101	0.091580383	0.091674941	0.095268563	0.09171545	0.09151313	0.092172083	0.09395632	0.091591704	0.094781377	0.09275865	0.09204147	0.096706135	0.092168186	0.095980454	0.091614873	0.094115316	0.095235044	0.099716933	0.098206186	0.099253123	0.095230391	0.091917259	0.098704874	0.094398809	0.091885385	0.092193035	0.092174803	0.091976672	0.093623227	0.098140469	0.101360731	0.095027149	0.09697304	0.095909217	0.096834383	0.1157254	0.094755703	0.099204148	0.101910884	0.09298099
337	0.09572513	0.093581327	0.09419799	0.095555756	0.108164257	0.094622504	0.094282876	0.093698908	0.102109442	0.093662653	0.093743099	0.097190446	0.093777554	0.093591714	0.094198942	0.096147366	0.093699964	0.096987698	0.094922665	0.094074555	0.098945145	0.094313838	0.09820753	0.09372777	0.0963098	0.097161294	0.102006399	0.10046976	0.101534406	0.097444901	0.09405176	0.100977019	0.096598314	0.094017907	0.094337851	0.094320248	0.094019547	0.095807562	0.100402851	0.103680308	0.097238274	0.099216404	0.098135325	0.09907576	0.118440604	0.096961717	0.101484681	0.104240679	0.095151027
338	0.097756175	0.095699828	0.096276506	0.097590371	0.110098739	0.096800309	0.096359196	0.095841087	0.104060694	0.09578141	0.095850957	0.099191882	0.095880769	0.095707538	0.096275633	0.098359788	0.095839313	0.099215229	0.097109641	0.096155851	0.10120642	0.096484471	0.100456298	0.095870873	0.098525575	0.099165949	0.104321947	0.102757243	0.103841051	0.099680722	0.096212814	0.103273756	0.098819041	0.096177287	0.096507782	0.096490708	0.096108245	0.098013508	0.10268905	0.106028802	0.099470651	0.101482284	0.100383086	0.101339536	0.121228104	0.09918894	0.10379051	0.106600398	0.09734352
339	0.099846403	0.097852152	0.098399348	0.099682935	0.112144555	0.099002186	0.098480518	0.098012212	0.106104908	0.097934013	0.09799528	0.101263031	0.098021602	0.097857806	0.098397125	0.100594692	0.098008158	0.101465425	0.099319943	0.098280604	0.103492019	0.098679862	0.102728618	0.098042768	0.100763831	0.101239364	0.106666345	0.105071063	0.10617572	0.101939476	0.098399809	0.105597628	0.101062296	0.098362844	0.098702575	0.098685952	0.09823844	0.100242001	0.105001479	0.10840935	0.101725835	0.103772809	0.102654343	0.103627808	0.124096565	0.101438818	0.10612429	0.108993297	0.099559014
340	0.101976191	0.100029894	0.100553263	0.101814334	0.114263835	0.101225428	0.100633302	0.100206412	0.108209605	0.100112073	0.100166419	0.10337998	0.100189857	0.100033808	0.100549942	0.102851523	0.100200339	0.103738406	0.101551524	0.100435927	0.105803151	0.10089674	0.105025348	0.100237677	0.103024173	0.103358055	0.109041883	0.107413017	0.108540557	0.104221597	0.100608663	0.107950605	0.103327912	0.100570346	0.100918903	0.100902695	0.10039816	0.102492153	0.107341909	0.11082472	0.104004132	0.106089302	0.104949922	0.105941846	0.127054473	0.103711459	0.108488151	0.111422293	0.101795826
341	0.104144095	0.102233606	0.102737919	0.103983211	0.116451979	0.103471707	0.102817161	0.102424721	0.110371203	0.102316147	0.102364697	0.105540568	0.102385754	0.102236041	0.102733711	0.105132472	0.102416832	0.106036555	0.103806205	0.102621554	0.108142594	0.103136662	0.107349124	0.102456651	0.105308835	0.105519931	0.111451935	0.109786171	0.11093884	0.10652957	0.102840764	0.110335857	0.105618188	0.102801151	0.103158307	0.103142489	0.1025873	0.104766065	0.109713391	0.113278656	0.106307986	0.108434594	0.107272449	0.108284458	0.130112637	0.106009242	0.110885359	0.113891259	0.104055864
342	0.106344816	0.104461966	0.104950257	0.106184442	0.11869726	0.105741822	0.105028937	0.104666742	0.112579911	0.104544916	0.104588341	0.107737995	0.104607324	0.10446307	0.104945293	0.107439231	0.104657134	0.108361881	0.106085052	0.104834558	0.110512947	0.105400209	0.109702341	0.104699326	0.107619587	0.10771834	0.113899891	0.112193519	0.113373833	0.108865561	0.10509638	0.112756511	0.107934995	0.105055471	0.105421345	0.105405911	0.104803258	0.107065283	0.112118901	0.115775008	0.108639501	0.110811355	0.109624303	0.110658284	0.133283227	0.108334171	0.113319171	0.1164042	0.106340339
343	0.108576344	0.106715274	0.107189563	0.108416119	0.120994011	0.10803737	0.107267854	0.10693333	0.114831174	0.106798684	0.106837386	0.109969397	0.106854488	0.106715134	0.107183929	0.109774004	0.106922034	0.110716815	0.108389833	0.107074299	0.112917107	0.107688841	0.112087729	0.106966578	0.109958683	0.109950503	0.11638936	0.114638301	0.115849028	0.11123212	0.107376779	0.115215928	0.110280662	0.107334538	0.107709461	0.107694416	0.107045581	0.109391905	0.114561662	0.118317823	0.111001176	0.113222545	0.112008199	0.113066254	0.13657897	0.110688672	0.115793067	0.118965316	0.108651122
344	0.110839373	0.108995232	0.10945708	0.110678981	0.123341355	0.110360746	0.10953513	0.109226458	0.117124604	0.109079154	0.10911341	0.11223511	0.10912877	0.108993901	0.109450841	0.112139624	0.10921347	0.113104394	0.11072306	0.109342053	0.115358597	0.110004868	0.114508627	0.109260389	0.112329003	0.112216792	0.118924725	0.117124441	0.118368657	0.113632403	0.109684154	0.11771818	0.112658137	0.109640524	0.110024956	0.110010312	0.109315628	0.111748682	0.117045576	0.12091207	0.11339612	0.115671752	0.114427463	0.11551193	0.140017828	0.11307578	0.118311265	0.12157978	0.110990793
345	0.113133072	0.111302809	0.111752972	0.112972273	0.125735687	0.112714027	0.111830884	0.111547552	0.119457426	0.111387297	0.111417169	0.114533647	0.111430834	0.111300289	0.111746158	0.114538768	0.111532815	0.115527545	0.113086972	0.111638045	0.117840905	0.112350241	0.116968314	0.111582204	0.11473328	0.114515784	0.121510425	0.119655875	0.120936997	0.116069474	0.112020282	0.120267368	0.115070232	0.111975177	0.112369767	0.112355548	0.111613771	0.11413818	0.119574557	0.123562818	0.115827342	0.118162545	0.116885359	0.117998843	0.143619393	0.115498416	0.12087803	0.124252887	0.113361688
346	0.115459886	0.113640733	0.114079808	0.115298448	0.128179325	0.115100388	0.114157676	0.113899479	0.121831953	0.11372584	0.113751339	0.116867397	0.113763336	0.113637012	0.114072443	0.116975068	0.113882915	0.11799015	0.115484854	0.113964851	0.120368564	0.114728065	0.119471068	0.113934893	0.117175201	0.116849876	0.124152276	0.122237719	0.123559633	0.118547365	0.114388179	0.122868834	0.117520715	0.114341497	0.114746988	0.114733224	0.113942611	0.116563936	0.12215369	0.126276792	0.118298809	0.120699553	0.119386145	0.120531581	0.147414156	0.117960456	0.123498926	0.126991689	0.115767159
347	0.117817984	0.116009388	0.116436996	0.117655772	0.13066686	0.117521462	0.116514858	0.116283156	0.12424388	0.116095172	0.116116051	0.119233704	0.116126297	0.116004392	0.11642906	0.119450743	0.116264624	0.120494651	0.117918504	0.116321954	0.122944482	0.11713984	0.122019629	0.116319394	0.119657037	0.119216491	0.126853892	0.124873224	0.126240063	0.121068638	0.116789154	0.125525946	0.120011929	0.116740759	0.117158103	0.117144837	0.11630181	0.119028066	0.124786209	0.12905805	0.120813038	0.123285745	0.12193255	0.123113086	0.151414564	0.120464341	0.126177441	0.129800394	0.118209103
348	0.120207674	0.118410362	0.118825541	0.120044606	0.133196748	0.119979715	0.118903402	0.118700517	0.126692198	0.118496882	0.118512733	0.121632426	0.118521079	0.118403978	0.118816989	0.121968809	0.118679834	0.123044314	0.120390534	0.118710399	0.125572516	0.119587924	0.12461763	0.118737655	0.122181858	0.121615535	0.129620197	0.127566739	0.128983023	0.1236367	0.119225423	0.128243241	0.122547027	0.119175154	0.119605461	0.119592742	0.118692521	0.121533481	0.127476437	0.131912242	0.123373375	0.125925062	0.124528189	0.125747262	0.155644585	0.123013331	0.128918295	0.132684916	0.120690217
349	0.122636046	0.120849331	0.121251634	0.122471965	0.135779708	0.122480811	0.121329538	0.121157097	0.129186269	0.120936642	0.120947173	0.124071342	0.12095352	0.120841469	0.121242447	0.124535576	0.121134088	0.125645892	0.12290673	0.121136331	0.12826072	0.12207792	0.127272599	0.121195206	0.124756071	0.124054719	0.132462067	0.130327576	0.131798867	0.126258591	0.121702531	0.131030525	0.125132551	0.12165022	0.122094655	0.122082541	0.121120779	0.124086332	0.130233618	0.134852366	0.125986743	0.128625766	0.127180555	0.128442281	0.160186516	0.125614171	0.131731797	0.135659031	0.123216378
350	0.125101417	0.12332668	0.123714757	0.124936256	0.138410595	0.125026277	0.123792691	0.123653773	0.131722043	0.123414844	0.123419519	0.126547985	0.123423671	0.123317196	0.123704876	0.127153092	0.123628205	0.128301625	0.125468771	0.123599298	0.131011719	0.124611237	0.129987025	0.123692943	0.127381767	0.126531658	0.135382676	0.133158631	0.134690682	0.128936651	0.124221715	0.133890788	0.127770659	0.124167164	0.124627079	0.124615639	0.1235863	0.126688579	0.133060634	0.137881919	0.128655442	0.131390529	0.129892124	0.131200793	0.165047202	0.128269097	0.134621028	0.138726344	0.12578935
351	0.127605024	0.125844559	0.126216623	0.127438752	0.141089544	0.127619018	0.126294554	0.126192972	0.134299932	0.125933634	0.1259318	0.1290633	0.125933505	0.125833274	0.126205971	0.129824823	0.126164577	0.131015256	0.128079701	0.126101045	0.133829944	0.127190678	0.132765073	0.126233304	0.130062472	0.129047323	0.138387762	0.136064932	0.137663972	0.131674784	0.126785647	0.136829286	0.130464964	0.126728634	0.127205526	0.127194835	0.126090906	0.129343573	0.135962482	0.141007558	0.131383309	0.134223884	0.132667042	0.134027288	0.170258593	0.130981847	0.13759147	0.141893843	0.128412266
352	0.130152551	0.128408205	0.128762556	0.129985101	0.143824469	0.130264856	0.128840463	0.128780038	0.136926882	0.128498254	0.12848925	0.131623308	0.128488264	0.128394941	0.128751062	0.132557563	0.128748526	0.133794163	0.130745555	0.128646879	0.136724417	0.129821937	0.135615106	0.12882164	0.132805108	0.131607708	0.141489848	0.13905706	0.14073061	0.134480736	0.129399869	0.139857215	0.133222572	0.12934015	0.129835671	0.129825819	0.128639874	0.132057891	0.138949657	0.144244454	0.134177937	0.137135108	0.135513627	0.136930932	0.175934533	0.133759789	0.140654943	0.145177683	0.131091301
353	0.132747143	0.131021091	0.131355815	0.132578451	0.14661884	0.132967944	0.131433669	0.131418648	0.139606105	0.131112177	0.131095271	0.134231128	0.131091321	0.131005649	0.131343404	0.135356204	0.1313837	0.136643647	0.133470657	0.131240071	0.139701537	0.132509054	0.138543091	0.131461635	0.135614654	0.134215938	0.144697578	0.142142422	0.14389883	0.137360058	0.132068283	0.142982374	0.136048593	0.132005591	0.132521543	0.132512629	0.131236508	0.134836264	0.142029514	0.147602914	0.137044775	0.140130769	0.138437814	0.139918217	0.182142068	0.136608215	0.143819646	0.148588778	0.133830891
354	0.135392613	0.133687456	0.134000357	0.135222622	0.149477083	0.135733481	0.134078118	0.134113323	0.142341595	0.133779641	0.133754004	0.136890564	0.133746784	0.133669611	0.133986942	0.138227014	0.134074579	0.139570577	0.136260451	0.133884587	0.142769819	0.135257067	0.141556887	0.134157825	0.138497509	0.136875821	0.148022949	0.145331081	0.14717998	0.14031999	0.134795725	0.146215437	0.138949617	0.13472976	0.135268159	0.135260297	0.133884816	0.137684729	0.14521203	0.151097589	0.139990909	0.143219636	0.141447416	0.142997802	0.189007557	0.139533983	0.147096872	0.152142771	0.13663664
355	0.138093284	0.136411947	0.136700576	0.137921934	0.15240447	0.138567113	0.1367782	0.136868995	0.145138054	0.136505297	0.136470007	0.139605981	0.136459174	0.136391449	0.136686063	0.14117681	0.136826052	0.142582433	0.13912085	0.136584835	0.145938579	0.13807145	0.144665078	0.136915154	0.141460633	0.139591724	0.151479181	0.148634084	0.150586554	0.143368425	0.137587458	0.149568137	0.141932815	0.137517886	0.138080972	0.138074292	0.136589239	0.140609845	0.148508158	0.154744701	0.143024062	0.146411309	0.144550965	0.146179164	0.196676502	0.142544564	0.150499052	0.155857005	0.139514636
356	0.140853202	0.139199351	0.139460809	0.140680446	0.155405492	0.141474987	0.139538233	0.139690863	0.147999525	0.139293933	0.139247921	0.142381333	0.139233077	0.139175913	0.139445089	0.144213208	0.139643262	0.145687663	0.14205834	0.139345172	0.149218559	0.140958127	0.147877488	0.139738841	0.144511822	0.142367615	0.155082015	0.152064371	0.154133347	0.146514325	0.140449128	0.153054291	0.145006245	0.140375571	0.140965879	0.140960531	0.139354205	0.143618913	0.151930717	0.158563918	0.146152984	0.149716891	0.147758221	0.149473248	0.205374462	0.145648386	0.154040903	0.159752639	0.142471585
357	0.143676721	0.142054708	0.142285665	0.143502526	0.158485121	0.144463536	0.142362808	0.142584386	0.150930471	0.142150592	0.142092642	0.145220917	0.142073334	0.142028004	0.142268613	0.147344192	0.142531604	0.148895132	0.145079708	0.142170228	0.152621087	0.143923298	0.151204456	0.142634359	0.14765925	0.145207803	0.158848188	0.155635639	0.157836069	0.149767104	0.143386648	0.156688551	0.148178362	0.14330868	0.143929052	0.143925207	0.142184408	0.146719576	0.155493276	0.162576284	0.149386861	0.153148095	0.151079454	0.152891598	0.215368079	0.148854302	0.15773805	0.163852354	0.145514505
358	0.146568508	0.144983522	0.145180125	0.146392854	0.161648633	0.147539908	0.14525689	0.145555556	0.153935622	0.14508078	0.145009502	0.148129314	0.144985211	0.14495318	0.1451616	0.150578749	0.145497004	0.152214879	0.148192523	0.145065011	0.156159159	0.14697384	0.15465779	0.145607726	0.150912131	0.148116883	0.162797313	0.159363767	0.161713067	0.153137459	0.146406555	0.160487957	0.151458712	0.146323694	0.146977334	0.146975189	0.145084936	0.149920421	0.159211552	0.166806757	0.152736118	0.156718385	0.154526386	0.156447476	0.227024534	0.152172328	0.161608733	0.168183161	0.148651238
359	0.149533946	0.147992046	0.148149879	0.149356824	0.164902277	0.150712264	0.148226146	0.148611188	0.157020549	0.148090752	0.148004564	0.151111846	0.1479747	0.147957643	0.148129718	0.153927237	0.148546192	0.155658538	0.151405443	0.148035237	0.159848046	0.150117588	0.158251287	0.14866578	0.154281098	0.151100191	0.166952977	0.163267621	0.165786321	0.156637825	0.149516286	0.16447284	0.154858332	0.149427988	0.150118521	0.150118301	0.148061587	0.15323132	0.16310421	0.171285798	0.15621286	0.160443613	0.158112714	0.160156478	0.240894185	0.155614077	0.165674798	0.172778185	0.15189077
360	0.152579	0.151087213	0.151201226	0.152400415	0.16825306	0.153989731	0.151276853	0.151758853	0.160191477	0.151187446	0.151084546	0.154174424	0.151048436	0.15104827	0.151179247	0.157401366	0.151686647	0.159239328	0.154728177	0.151087233	0.163705319	0.153363298	0.162000751	0.151816121	0.157778183	0.154163653	0.171342899	0.167369124	0.170081565	0.160282378	0.152724135	0.168666917	0.158389732	0.15262978	0.153361321	0.153363288	0.151120783	0.156663412	0.167192933	0.176049663	0.159830864	0.164342048	0.161854118	0.164036571	0.257763211	0.159192739	0.169961816	0.177677028	0.155243192
361	0.155710203	0.15427667	0.154341078	0.155530174	0.171708687	0.157382502	0.154415898	0.155006932	0.163455227	0.154378508	0.154256845	0.157323522	0.154213724	0.154232639	0.154317076	0.161014356	0.154926643	0.162972259	0.158171598	0.154227949	0.167751195	0.156720725	0.165924274	0.155067163	0.161416991	0.157313756	0.175999696	0.171693781	0.174628975	0.164087263	0.156039321	0.173097879	0.162067081	0.155938202	0.156715436	0.156719892	0.154269578	0.160229244	0.171502923	0.181141621	0.163605806	0.168434753	0.165768545	0.168108449	0.278776574	0.16292329	0.174499759	0.182927171	0.158719824
362	0.158934817	0.157569008	0.157577158	0.158753381	0.175277722	0.160902224	0.157650972	0.158364901	0.166819362	0.157672536	0.157529756	0.160566317	0.157478748	0.157519265	0.157550898	0.164781537	0.158275526	0.166874856	0.161748176	0.157465146	0.172009681	0.160200991	0.170043206	0.158428421	0.165213319	0.160557697	0.180963199	0.176272278	0.179465221	0.168071411	0.159472321	0.17779921	0.165906869	0.159363627	0.160191923	0.160199218	0.157515861	0.163943322	0.176064492	0.186615435	0.167556034	0.172746796	0.16987716	0.172396717	0.305745688	0.166823217	0.179325038	0.188587956	0.162333678
363	0.162260782	0.16097372	0.160917943	0.162077996	0.178969525	0.164561944	0.160990517	0.16184327	0.170292133	0.161079023	0.160912426	0.163910649	0.160852524	0.160917546	0.160889158	0.168720298	0.161743656	0.170967128	0.165471921	0.160807349	0.176508603	0.163816529	0.174382148	0.161910451	0.169185118	0.163903336	0.186280779	0.181140624	0.18463373	0.172256513	0.163034813	0.182810377	0.16992787	0.162917612	0.163803137	0.163813679	0.160868305	0.16782206	0.180913177	0.192536094	0.171702541	0.177307294	0.174204346	0.176929931	0.341414752	0.170912479	0.184480755	0.194731515	0.166099403
364	0.165696973	0.164501515	0.164372946	0.165512921	0.182794564	0.168376625	0.164444002	0.165453965	0.173882751	0.164608683	0.164415154	0.167365268	0.164345201	0.164438084	0.164341331	0.172850882	0.165342779	0.175272534	0.169358965	0.164264129	0.181281167	0.167581564	0.178970268	0.165525233	0.173353312	0.16735945	0.192010698	0.186342411	0.190187642	0.176668111	0.166740117	0.188179407	0.174152023	0.166613333	0.16756321	0.167577478	0.164336651	0.171884509	0.186091972	0.198985067	0.176070002	0.182151082	0.178778995	0.181742217	0.390144056	0.175214476	0.190019632	0.20144885	0.170033905
365	0.169253284	0.168164459	0.167952815	0.16906808	0.186764502	0.172363406	0.168022024	0.169210493	0.177601459	0.168273585	0.168049523	0.170939914	0.16796818	0.168092816	0.167918019	0.177196827	0.169086188	0.17981856	0.173427852	0.167846203	0.186366997	0.17151235	0.183842128	0.169286339	0.177742278	0.170935805	0.1982247	0.191930433	0.196192041	0.181336263	0.170603404	0.193964791	0.178604942	0.170465785	0.171488283	0.171506839	0.167931821	0.176152752	0.191652908	0.2060647	0.180687407	0.187319834	0.183635329	0.186874355	0.458570898	0.17975662	0.196006212	0.208855061	0.174156662
366	0.172940795	0.171976223	0.171669533	0.172754591	0.190892384	0.176542052	0.171736505	0.173128245	0.1814597	0.172087403	0.171828624	0.174645475	0.171734338	0.171895259	0.171631153	0.181785723	0.172989019	0.184637682	0.177700052	0.171565632	0.191813846	0.17562758	0.189039072	0.173209236	0.182380638	0.174643327	0.205012254	0.197969358	0.202727624	0.186296656	0.17464206	0.200238594	0.183316783	0.174492145	0.175596914	0.175620422	0.171666118	0.180652588	0.197659658	0.213905441	0.185589105	0.192863914	0.18881426	0.192375576	0.555519272	0.184571298	0.202520483	0.21709794	0.178490285
367	0.176771965	0.175952366	0.17553664	0.176584959	0.195192852	0.180935481	0.175600912	0.177224846	0.185470298	0.176065697	0.175767322	0.178494173	0.175658283	0.175860788	0.175494209	0.18665012	0.177068588	0.189768551	0.182200575	0.175436057	0.197679759	0.179948874	0.194610952	0.17731164	0.187302229	0.178494276	0.212486175	0.204539159	0.209895512	0.191591976	0.178876118	0.207090515	0.188323295	0.178712194	0.179910554	0.179939804	0.17555347	0.18541435	0.204190899	0.222675691	0.190816102	0.198844726	0.194365095	0.19830582	0.686902759	0.189697048	0.209662622	0.226369802	0.183061177
368	0.180760872	0.180110699	0.179569519	0.180573318	0.199682401	0.18557046	0.179630539	0.1815206	0.18964769	0.180226281	0.17988259	0.182499788	0.179756681	0.180006992	0.179522495	0.191828742	0.181344826	0.195257574	0.186958757	0.179472978	0.204036035	0.184501404	0.200618478	0.18161397	0.19254739	0.182502481	0.220790662	0.211739936	0.21782408	0.197273759	0.183328816	0.214633604	0.193667215	0.183148859	0.184454172	0.184490107	0.179609719	0.190473988	0.211345007	0.232596257	0.196417794	0.205337936	0.200347842	0.204738856	0.836809147	0.195180136	0.217559736	0.236924993	0.187900406
369	0.184923487	0.184471712	0.183785723	0.184735708	0.204379681	0.190478449	0.183842831	0.186039035	0.194008186	0.184589646	0.184193906	0.186677916	0.184048637	0.184354094	0.183733472	0.197368011	0.185840803	0.201160941	0.192009251	0.183694091	0.210971146	0.189314663	0.207136281	0.186139886	0.198164586	0.186683596	0.230112494	0.219698435	0.226678395	0.203404774	0.18802726	0.223012084	0.199400061	0.187828868	0.189257006	0.189300759	0.183852977	0.195874424	0.219246416	0.243961113	0.202454199	0.212437766	0.206836224	0.211766404	0.950676279	0.201076569	0.226375165	0.249105281	0.193044773
370	0.189278004	0.189059098	0.18820537	0.18909041	0.209305845	0.195696648	0.188257777	0.190807548	0.198570276	0.189179483	0.188723724	0.191046282	0.188556153	0.188925458	0.18814715	0.203323994	0.190583356	0.207547239	0.197393249	0.18811969	0.218595951	0.194423414	0.214256952	0.190916952	0.204212494	0.191055417	0.240696709	0.228576956	0.236673327	0.210062121	0.19300326	0.232412116	0.205584407	0.192783561	0.194353499	0.194406442	0.188304038	0.201667278	0.228054279	0.257167334	0.208998855	0.220262723	0.213921641	0.219503647	0.985555712	0.207454703	0.236321389	0.263376787	0.198538171
371	0.193845276	0.193900451	0.192851674	0.193658382	0.214485003	0.201269457	0.192898428	0.195858305	0.203355039	0.194023383	0.193498116	0.195625144	0.193304746	0.193748277	0.192786612	0.209765148	0.195603957	0.214501187	0.20316019	0.192773205	0.227051344	0.199868993	0.222096898	0.195977539	0.210762948	0.195638284	0.252870605	0.238586681	0.248093467	0.21734169	0.198294463	0.243078045	0.212297142	0.19805	0.199784588	0.199848393	0.192986943	0.207915284	0.237975429	0.272762009	0.216142971	0.228964033	0.221718917	0.228097317	0.962077708	0.214398954	0.247679642	0.280388253	0.204433468
372	0.198649284	0.199028052	0.197751524	0.198463738	0.219944704	0.207250176	0.197791475	0.201229252	0.208386566	0.19915362	0.198547484	0.200437734	0.198324138	0.198854335	0.197678582	0.216775672	0.200939687	0.22212826	0.209369782	0.197681792	0.236518139	0.205700835	0.230803795	0.201359845	0.217904539	0.200455531	0.267076756	0.250005456	0.261320288	0.225363738	0.203945656	0.255334296	0.219633461	0.203672238	0.205599201	0.205675917	0.197929594	0.21469522	0.249281632	0.29150857	0.224000598	0.238736607	0.230373606	0.237736196	0.91400109	0.222014403	0.26082662	0.301053863	0.210794746
373	0.203717749	0.204479906	0.202936241	0.203534366	0.225716547	0.213703305	0.202967991	0.206965462	0.213692516	0.204608187	0.203907498	0.205510816	0.203649152	0.204281022	0.202854184	0.224460133	0.206634534	0.230561183	0.216094745	0.202877104	0.247231324	0.211978523	0.24056723	0.207109261	0.225747624	0.205534047	0.283922532	0.263203974	0.276872653	0.234280771	0.210010532	0.269617849	0.227712433	0.209703038	0.211856267	0.211948434	0.203164564	0.222101936	0.262334972	0.314487076	0.232715921	0.249834911	0.240072415	0.248666283	0.856640656	0.230433248	0.276274312	0.326677998	0.217700369
374	0.209082962	0.210301177	0.208442616	0.208902769	0.231836994	0.220707824	0.20846446	0.21312102	0.219304855	0.210432228	0.209620383	0.210875462	0.209320957	0.210072726	0.208349964	0.23295023	0.212741209	0.239969507	0.223424749	0.208396349	0.259501711	0.218774691	0.251634699	0.213280272	0.234431641	0.210905054	0.304257594	0.278686304	0.295470102	0.244289261	0.216554155	0.286528759	0.236685184	0.216206279	0.21862758	0.218738365	0.208730209	0.230254207	0.277627104	0.343248582	0.242474068	0.262597168	0.251058861	0.261213889	0.79625151	0.239824332	0.294732211	0.359143281	0.225247385
375	0.214782601	0.216545677	0.214313958	0.214606891	0.238348127	0.228360828	0.214323803	0.219761028	0.22526056	0.216679524	0.215736251	0.216567781	0.215388341	0.216282285	0.214208927	0.242412702	0.219323059	0.250571078	0.231470837	0.214283361	0.273743147	0.226178226	0.264331372	0.219938485	0.244133723	0.216604852	0.329274075	0.297142128	0.318114917	0.255643859	0.223655657	0.306895611	0.246744589	0.223259562	0.226000928	0.226134321	0.214671788	0.239301515	0.295829805	0.379998668	0.253514153	0.277475929	0.263652597	0.275814749	0.735654191	0.250404548	0.317187988	0.401116633	0.233556516
376	0.220861011	0.223278211	0.220601742	0.220691419	0.245298832	0.236783272	0.220597	0.22696475	0.231602723	0.223414834	0.222315193	0.222630102	0.221909711	0.222973262	0.220482164	0.253061938	0.226457095	0.262650436	0.240372439	0.220590282	0.290516481	0.234299309	0.279091994	0.227163818	0.255082448	0.222676001	0.360659721	0.319530599	0.346220555	0.268680246	0.231412472	0.331879641	0.258140776	0.230958335	0.234085046	0.234246116	0.221043239	0.249434831	0.317876181	0.427809601	0.266150227	0.295087488	0.278280592	0.293061094	0.675927984	0.262457119	0.345033979	0.456219174	0.242780092
377	0.227370647	0.230577337	0.22736749	0.227209248	0.252746043	0.246127142	0.227344945	0.234829405	0.23838175	0.230716644	0.229429712	0.229112259	0.228955426	0.230222621	0.227230713	0.265176421	0.234237602	0.276583199	0.25030622	0.227379488	0.31058928	0.243275667	0.296503995	0.23505433	0.267575841	0.229168625	0.400770933	0.347191601	0.381768946	0.283845716	0.239945533	0.363109061	0.271201539	0.239420919	0.243015734	0.243210992	0.227909219	0.260900573	0.345068718	0.490591493	0.280799222	0.316278979	0.295519264	0.313765586	0.617526035	0.276355841	0.380222908	0.528662358	0.253112117
378	0.234373921	0.238539016	0.234685229	0.234223354	0.260756262	0.256585291	0.234640854	0.243475236	0.245656856	0.238680812	0.237167938	0.236073246	0.236610851	0.23812426	0.234527988	0.279121892	0.242780983	0.292870708	0.261498323	0.234726106	0.335019534	0.253281102	0.317368716	0.243731361	0.282006801	0.236142085	0.452738636	0.38198631	0.427458254	0.301742696	0.249406307	0.402833038	0.286361237	0.248795324	0.252964207	0.253202096	0.235347765	0.274020173	0.379217122	0.57205603	0.29802071	0.342221609	0.316154335	0.33905055	0.560591337	0.292599519	0.42541743	0.621042741	0.264802264
379	0.241945546	0.247281416	0.242644661	0.241809192	0.269407372	0.268404883	0.24257338	0.253052276	0.253497918	0.24742535	0.245637824	0.243583296	0.244980355	0.246793661	0.242462907	0.295383688	0.2522322	0.31218843	0.274241215	0.242721271	0.365264561	0.264537105	0.342784808	0.253346389	0.29889864	0.243667073	0.520149035	0.426423118	0.486643497	0.323189282	0.259986314	0.453999031	0.304201209	0.259268449	0.264148443	0.264440031	0.243453757	0.289217332	0.422767076	0.671845305	0.318572336	0.374528624	0.341262582	0.370462405	0.505093676	0.311860074	0.483946111	0.728085562	0.278175214
380	0.250175507	0.256951221	0.251355246	0.250057712	0.278790743	0.281905698	0.251250612	0.263749368	0.261987722	0.257096718	0.254972627	0.25172648	0.25419251	0.256373976	0.251143917	0.314611162	0.262773332	0.335451328	0.288916759	0.251476313	0.403296576	0.277328604	0.374251307	0.264090168	0.318953804	0.251828247	0.605301964	0.483590905	0.562452536	0.349299273	0.271929952	0.519914898	0.325504931	0.271078463	0.276848567	0.277208509	0.252343379	0.307055511	0.478758401	0.777694354	0.343483893	0.415368068	0.372313584	0.410086739	0.450939439	0.335047578	0.558974761	0.82862694	0.293657198
381	0.259172825	0.267731951	0.260951477	0.259079211	0.289013628	0.297504955	0.260805239	0.275806189	0.271224692	0.267878096	0.265338081	0.260603968	0.264406884	0.267044046	0.260704197	0.337676618	0.274634986	0.363895741	0.306027547	0.261128193	0.451640841	0.292025293	0.413762678	0.276204928	0.343117988	0.260727526	0.704385111	0.556364054	0.654708376	0.38157585	0.285551787	0.602593424	0.35132941	0.284531491	0.291427658	0.291875549	0.262159921	0.328288253	0.550119149	0.862214026	0.374146864	0.467449241	0.411266187	0.460560105	0.398074178	0.363391838	0.650558835	0.892194886	0.311812009
382	0.269070319	0.279854903	0.271599691	0.2690082	0.300201778	0.315750378	0.271401212	0.289529257	0.281326165	0.280000281	0.276941795	0.270338108	0.27582292	0.279028946	0.27130837	0.365747022	0.288111446	0.399161992	0.326238351	0.271846523	0.513066716	0.309110134	0.463789236	0.290000602	0.372656132	0.270488214	0.800754568	0.644711374	0.753732086	0.421983062	0.301259677	0.698341748	0.383085618	0.300023909	0.308359557	0.308921802	0.273081305	0.353922663	0.637186201	0.90075346	0.412393356	0.533514527	0.460560404	0.524654919	0.34660713	0.39852518	0.749557426	0.905492517	0.333388269
383	0.280030612	0.293613463	0.283506832	0.280009557	0.312502088	0.337362499	0.283242302	0.305312942	0.292432228	0.293755912	0.290045464	0.281077473	0.288691461	0.292613742	0.283161137	0.400351986	0.303580554	0.44331519	0.350427754	0.283842613	0.589256225	0.329216291	0.526830393	0.305876142	0.409217407	0.28126012	0.867903737	0.740253956	0.836860331	0.472872733	0.31958498	0.791730744	0.422592664	0.318071509	0.328264897	0.328977253	0.285329787	0.385287504	0.732473217	0.893807775	0.460470383	0.614485142	0.522710575	0.603660924	0.296961513	0.442505152	0.833788676	0.881324256	0.359376796
384	0.292253594	0.309381458	0.296931574	0.292286186	0.326084873	0.363283716	0.296582947	0.32366625	0.304710076	0.309517704	0.30498051	0.293003045	0.303329491	0.308161151	0.296518227	0.44338846	0.321529088	0.498618259	0.379743225	0.297380979	0.677403864	0.353171597	0.603831795	0.324346645	0.454810953	0.293225811	0.889851228	0.822692403	0.880831301	0.536433086	0.341220076	0.858097698	0.471992574	0.339345848	0.351954625	0.352865454	0.299184334	0.424070461	0.816600856	0.858954767	0.520643666	0.705274532	0.598820673	0.693524471	0.250017406	0.497594298	0.87961797	0.837694805	0.391066738
385	0.305985545	0.32763597	0.312198186	0.306088413	0.341144995	0.394721503	0.311741767	0.345245037	0.318358657	0.327761072	0.322167582	0.306335597	0.320138543	0.326133517	0.311700062	0.496892413	0.342583472	0.56660551	0.41563349	0.312793708	0.765393455	0.382043213	0.690605331	0.346075916	0.511476126	0.306608102	0.873443472	0.869660303	0.881595113	0.612961909	0.367059891	0.88169687	0.533227682	0.364714951	0.380474156	0.38164805	0.314996054	0.472217428	0.866794047	0.810417889	0.593834801	0.790367386	0.685140428	0.780155035	0.207143344	0.565351294	0.882018147	0.784840441	0.430060643
386	0.321529701	0.348983169	0.32971282	0.321724883	0.357900311	0.433143695	0.329117427	0.370884719	0.333612908	0.349089699	0.342139015	0.321344008	0.339626019	0.347117842	0.32910781	0.562181673	0.367541614	0.645731782	0.459779253	0.330497339	0.832616471	0.417155276	0.77379798	0.371909258	0.580169832	0.321678476	0.834710385	0.874887662	0.852511611	0.697358084	0.398232563	0.86759996	0.606485998	0.395274967	0.415122631	0.416642848	0.333206266	0.531422975	0.875140588	0.755384996	0.676570295	0.848238986	0.768937005	0.842218138	0.169939723	0.644310178	0.853910562	0.72779426	0.478133991
387	0.339256525	0.37417996	0.349979385	0.339573211	0.376584848	0.480121286	0.349204112	0.401616116	0.350745786	0.374256848	0.365559023	0.338352942	0.362424797	0.371847248	0.349239104	0.637846296	0.3973906	0.727855144	0.513741867	0.351009313	0.862786811	0.460007687	0.833675403	0.402888515	0.658358371	0.338764857	0.784877252	0.849287763	0.807630498	0.776039417	0.436076507	0.830658179	0.687244812	0.43233368	0.457379372	0.459344578	0.354363815	0.60175727	0.851540855	0.697586497	0.757484696	0.866676447	0.830640581	0.865605206	0.139647546	0.726470379	0.809531621	0.669229832	0.536693479
388	0.359614132	0.404143336	0.373614499	0.360090827	0.397433309	0.536801797	0.372606218	0.438634446	0.370067085	0.404174298	0.393237217	0.35775018	0.389307733	0.401211876	0.372703003	0.716588646	0.433284842	0.797012269	0.577980183	0.374963303	0.856255405	0.511945399	0.856926744	0.440217941	0.736767557	0.358258996	0.729657194	0.806694671	0.754922221	0.830449305	0.481976728	0.782078129	0.76333976	0.477266868	0.508595508	0.511099914	0.37914033	0.679014647	0.810023077	0.638939005	0.818593934	0.851057886	0.856179007	0.853662038	0.116542599	0.79597727	0.757081034	0.610457534	0.605398585
389	0.383129414	0.43990373	0.401344529	0.383816264	0.42064929	0.602645363	0.400035917	0.483122143	0.391911822	0.439865478	0.426103594	0.379985781	0.421168732	0.436218885	0.40021772	0.784045704	0.476396346	0.83686444	0.64986174	0.403105535	0.825027696	0.573271989	0.846191893	0.485078459	0.799554812	0.380615498	0.672107579	0.755439407	0.698509532	0.849517266	0.536847915	0.727702299	0.817758796	0.531049428	0.569156558	0.572233586	0.408322952	0.752179524	0.759337899	0.580394999	0.846132556	0.814481054	0.84724976	0.819199012	0.099867829	0.836402772	0.70078954	0.552124825	0.679722663
390	0.410389729	0.482427293	0.433961516	0.411350327	0.446347965	0.673276705	0.432271594	0.535749924	0.416610502	0.482288397	0.46509314	0.405555316	0.458925345	0.477833061	0.432568779	0.825035009	0.527480119	0.842382885	0.721265504	0.43624714	0.78017143	0.64150138	0.813050563	0.538109706	0.832717919	0.406334493	0.613849727	0.699926477	0.640640458	0.836755747	0.599954669	0.670694664	0.839438272	0.593162198	0.636804481	0.640317893	0.442754736	0.805821676	0.704111478	0.522439569	0.840276893	0.766716865	0.815197957	0.772573055	0.088337807	0.842477097	0.642966462	0.494567393	0.748962901
391	0.441980846	0.532181632	0.472187676	0.443291712	0.47446779	0.739039062	0.47002913	0.595672394	0.444428877	0.53190441	0.510844799	0.43494907	0.503257322	0.526580303	0.470478796	0.833476464	0.585973368	0.820585119	0.779152237	0.475119008	0.728257409	0.709472888	0.76755877	0.598377356	0.833336649	0.435909433	0.555715904	0.642594899	0.582493404	0.803004304	0.667150074	0.612774018	0.829946142	0.659894443	0.704748148	0.70828585	0.48316114	0.829043381	0.646905591	0.465341942	0.810826025	0.713240229	0.770304794	0.719700389	0.080657429	0.821063073	0.584825306	0.43799773	0.798990151
392	0.478346543	0.588298002	0.516374554	0.480090798	0.504641568	0.787092767	0.513675427	0.659028229	0.475459585	0.587847864	0.563087472	0.468542094	0.554063044	0.581770045	0.514317062	0.814822077	0.648582967	0.782068076	0.81142584	0.520050457	0.672821369	0.76550296	0.715559728	0.661855234	0.80906247	0.469714229	0.498145032	0.584744866	0.52467704	0.75757554	0.729583246	0.554831464	0.798973218	0.722930932	0.761599296	0.764527046	0.52977315	0.822213988	0.58909249	0.409325084	0.767843624	0.657022829	0.718632193	0.663777107	0.075769395	0.782768533	0.526992317	0.382663017	0.820050055
393	0.519491468	0.647295481	0.565898638	0.521739718	0.536030142	0.808521256	0.562649848	0.717883332	0.509435288	0.646662911	0.619584333	0.506368041	0.609489398	0.64026767	0.563512383	0.778713164	0.708077153	0.734251405	0.814716968	0.570328235	0.615857371	0.79851499	0.66027297	0.720426331	0.769527772	0.507771524	0.44142413	0.527069165	0.467546797	0.705850583	0.775729201	0.49735395	0.755495847	0.770917163	0.796140633	0.797926551	0.58159761	0.793708985	0.53140289	0.354736766	0.717487857	0.599727336	0.66351207	0.60659915	0.07289112	0.735075794	0.46983062	0.32901938	0.812818293
394	0.56454826	0.702463663	0.618404422	0.567321685	0.567211706	0.802999699	0.614729085	0.762076355	0.545508203	0.701690438	0.675277962	0.547792532	0.665047988	0.695785128	0.615807688	0.732693217	0.754604214	0.68148819	0.794198689	0.623409874	0.558477734	0.804268162	0.603561437	0.763880757	0.721508576	0.549419315	0.385854514	0.469976602	0.411392245	0.650931213	0.797167538	0.440663979	0.705204143	0.794938676	0.803603923	0.804109289	0.635582929	0.752173947	0.474263231	0.302207154	0.663307177	0.542271167	0.606874764	0.549160956	0.071452989	0.682380305	0.413630364	0.277882882	0.784772854
395	0.611152261	0.744949641	0.669048387	0.614365921	0.596129363	0.777115953	0.665263686	0.783891726	0.581966993	0.744134992	0.722382579	0.591024464	0.713439198	0.739676098	0.666491247	0.681172379	0.779889896	0.62619947	0.758136545	0.674182092	0.501287015	0.786828813	0.546437843	0.784696493	0.668834776	0.592815515	0.331925785	0.413786262	0.356606571	0.594551313	0.793280219	0.385092243	0.65125442	0.793537269	0.787572983	0.787021594	0.685976811	0.703273747	0.417995196	0.252814537	0.607285333	0.485164001	0.549771653	0.492008676	0.071053428	0.627125537	0.358778008	0.230556109	0.743979358
396	0.655230861	0.767619294	0.711138609	0.658650648	0.620348107	0.738204638	0.707723033	0.781886673	0.616209095	0.766882432	0.753122278	0.632882684	0.74685583	0.764541986	0.708964762	0.62679876	0.781445051	0.569854433	0.712909164	0.715737901	0.444699802	0.753361308	0.489514977	0.7817251	0.613823557	0.634711738	0.280471099	0.358910155	0.303852737	0.537744355	0.769341157	0.331150716	0.595570147	0.771474493	0.755072921	0.753794815	0.725493325	0.650390903	0.363000561	0.208069455	0.550612843	0.428784939	0.492836066	0.435533706	0.071398428	0.570794764	0.30592311	0.188684796	0.695893491
397	0.691380951	0.76850469	0.738156433	0.694640019	0.637477635	0.691606918	0.735583632	0.760500391	0.644938716	0.767928154	0.763271722	0.668902478	0.760385886	0.767788823	0.736676202	0.571070931	0.762924402	0.513264573	0.662429591	0.741582266	0.389100677	0.710140423	0.433201464	0.759594526	0.557778179	0.670584629	0.232799472	0.306028009	0.254229776	0.48109409	0.732254331	0.279711131	0.539222594	0.735635722	0.7124777	0.710729461	0.747925306	0.595448793	0.309934736	0.169657649	0.493951727	0.373539095	0.436482819	0.380130036	0.072281253	0.514207113	0.256146392	0.153811713	0.643699088
398	0.714579505	0.750589669	0.746614464	0.717286955	0.645756913	0.640612159	0.745159457	0.725769338	0.664946233	0.750197221	0.753624316	0.694488529	0.75397111	0.751880386	0.74597691	0.514909637	0.73019849	0.456964591	0.609081423	0.748513742	0.335035622	0.661220615	0.377926914	0.724359721	0.501500611	0.695827897	0.190568547	0.256227197	0.209267427	0.425041047	0.687195401	0.232092109	0.482880722	0.691373076	0.663958766	0.661909288	0.750915328	0.539635578	0.259851937	0.138778471	0.437770525	0.320042832	0.381137277	0.326381884	0.073550374	0.457900776	0.210963162	0.126670949	0.589354669
399	0.722088478	0.719065705	0.737221048	0.723972256	0.6444718	0.587185587	0.736891855	0.682639296	0.674022478	0.718840407	0.728420614	0.706462813	0.731353555	0.721837854	0.73738668	0.458898722	0.688402128	0.40140591	0.554290119	0.737604568	0.283390081	0.609035035	0.32431779	0.680903464	0.445521337	0.707319053	0.155325341	0.211041359	0.170647388	0.370059388	0.637414412	0.189963969	0.427025409	0.642096531	0.61202767	0.609786923	0.736390173	0.483671244	0.214258877	0.115534906	0.382526083	0.269296268	0.327410726	0.275239221	0.075097598	0.402327176	0.172059966	0.106811856	0.534029706
400	0.714047229	0.678604364	0.713322965	0.715018283	0.633906316	0.532587409	0.713948294	0.634450241	0.671447581	0.678515395	0.692406166	0.70395509	0.697202394	0.682395657	0.714139956	0.403531218	0.641089183	0.347145648	0.498971737	0.712434651	0.235470434	0.555139854	0.27334473	0.632505757	0.390328383	0.704279163	0.127841394	0.172146377	0.139573711	0.31683026	0.584980285	0.154861753	0.372158571	0.589977549	0.558290494	0.555930948	0.708365527	0.428089472	0.174837248	0.099012787	0.328842314	0.222722806	0.276250381	0.228076582	0.076843838	0.34804049	0.140672871	0.092994099	0.478485337
401	0.692896174	0.632584676	0.679089107	0.693021162	0.615128373	0.477603933	0.680446795	0.583291097	0.657996487	0.632603434	0.649453016	0.688348471	0.655543716	0.637068729	0.680386563	0.349374905	0.590505429	0.295011024	0.44373368	0.677230572	0.192939921	0.5004924	0.226414362	0.58121419	0.336531704	0.688175942	0.107740131	0.140795901	0.116209569	0.266397402	0.531161687	0.127549692	0.318967518	0.536347998	0.503735033	0.501306257	0.671083308	0.373408796	0.142898561	0.087745762	0.277671323	0.18202269	0.229038542	0.186583223	0.078733542	0.295862109	0.117012962	0.083722651	0.423265631
402	0.661895852	0.583135961	0.637938124	0.661309707	0.589568738	0.422820044	0.639838584	0.530468275	0.635403453	0.583239716	0.602117452	0.662282066	0.609104381	0.588090069	0.639578584	0.297276656	0.538050758	0.246257158	0.389119927	0.63536204	0.157370459	0.445750395	0.185230692	0.528310955	0.285062284	0.661691484	0.093730553	0.11714637	0.099585097	0.220250445	0.476783098	0.107576304	0.268512728	0.482068652	0.449034596	0.446574413	0.627736524	0.32034422	0.118689703	0.080325503	0.230412591	0.148614711	0.187473793	0.152250148	0.080727939	0.24703992	0.100145017	0.077732768	0.368929972
403	0.623928159	0.531685055	0.592295483	0.622772253	0.558650523	0.368838823	0.594594335	0.476889614	0.605610479	0.531855875	0.552109915	0.628440995	0.559713739	0.536953518	0.594178178	0.248476097	0.484690876	0.20249679	0.335809476	0.589192905	0.129550553	0.391507735	0.151239835	0.474689282	0.237257728	0.627518424	0.084334909	0.100301287	0.088254601	0.180076504	0.422489074	0.093683437	0.222261087	0.427800054	0.394786279	0.392330048	0.580522996	0.269956412	0.101380601	0.075659765	0.18874169	0.122976975	0.153034784	0.125690494	0.082799379	0.203182418	0.088631685	0.074084979	0.316239738
404	0.581230757	0.479212892	0.543833935	0.579626355	0.523650857	0.316439693	0.546424911	0.423244827	0.570414805	0.479436598	0.500593635	0.589101512	0.508613526	0.484682029	0.545886786	0.20456834	0.43114293	0.165354233	0.284763837	0.54034532	0.109159125	0.338456584	0.12502907	0.42103267	0.194765678	0.587922484	0.078266438	0.08882673	0.080807451	0.147236222	0.36891064	0.084388575	0.181892662	0.374169629	0.341673508	0.339263068	0.530941616	0.223698937	0.089557076	0.072951277	0.154151654	0.104486768	0.126372909	0.106406093	0.08492888	0.165918288	0.081053664	0.072103099	0.266292141
405	0.535406976	0.42644596	0.493689567	0.533449924	0.485646646	0.26673234	0.496492946	0.370185287	0.531304397	0.426710959	0.448389639	0.54599402	0.456669026	0.432022181	0.495859519	0.16719745	0.378055558	0.135862988	0.237335124	0.489920584	0.094964993	0.287555542	0.10604773	0.367994566	0.159153955	0.544618328	0.07455851	0.081274344	0.076119962	0.12216044	0.316841697	0.078389423	0.148803578	0.321948776	0.290635486	0.288327162	0.480014453	0.183259803	0.081754728	0.071642248	0.127329149	0.091766295	0.107000552	0.093074733	0.087104136	0.136296413	0.076273262	0.071314625	0.220578414
406	0.487601725	0.37406931	0.442706648	0.485368413	0.445537724	0.221211602	0.445657893	0.31852186	0.489444388	0.374365252	0.396197888	0.500380435	0.404594394	0.379659013	0.444951036	0.137432815	0.32620912	0.113952913	0.195182043	0.438743367	0.085447659	0.240144533	0.092948283	0.316395395	0.131259364	0.498854977	0.072534381	0.076510544	0.073395485	0.104144675	0.267402243	0.074729678	0.123467324	0.272221583	0.242988752	0.240856396	0.428525272	0.150048317	0.07681348	0.071337063	0.107810502	0.083317373	0.093599096	0.084184376	0.089317355	0.114266297	0.073482428	0.071382567	0.180786097
407	0.438692583	0.322901665	0.39162086	0.436247609	0.404119436	0.181562588	0.394660116	0.26937484	0.445766417	0.32321794	0.344773691	0.453217752	0.353129511	0.328391702	0.393899631	0.115256813	0.276672304	0.098543529	0.15986333	0.387543914	0.079287686	0.197872165	0.08422369	0.267370328	0.110783265	0.451581172	0.071716838	0.073731812	0.072076059	0.091780531	0.222086602	0.072740374	0.105221909	0.226448485	0.200370014	0.198496521	0.37719904	0.124569398	0.073908053	0.071751169	0.094291247	0.07791649	0.084655813	0.078469928	0.091563972	0.098760275	0.072115448	0.072063978	0.148273208
408	0.389452253	0.274050484	0.341226663	0.386856732	0.36217244	0.149127613	0.344287847	0.224231691	0.401079817	0.274374747	0.295093493	0.405310858	0.303207658	0.279292387	0.343494486	0.099612862	0.230881851	0.08812781	0.132184603	0.337125971	0.07551914	0.162303376	0.078632267	0.222420269	0.096499586	0.403598593	0.071765648	0.07237725	0.071765831	0.083587757	0.182572137	0.071950788	0.09267231	0.186306521	0.164365938	0.162818163	0.326870397	0.106173453	0.072462832	0.072681014	0.085262051	0.074688548	0.078908896	0.075018544	0.093841856	0.088272989	0.071771195	0.073185047	0.123433648
409	0.340707243	0.228964747	0.292532612	0.338027784	0.320556727	0.124303061	0.295533659	0.184747351	0.356194275	0.229282266	0.248460086	0.357463959	0.256075	0.233774473	0.294732073	0.08902396	0.190488689	0.081338395	0.111829604	0.288520326	0.07345939	0.134285889	0.07527286	0.183199043	0.086915467	0.355713523	0.072434637	0.072043273	0.072178248	0.078380204	0.150185961	0.072020642	0.084350613	0.153184409	0.135883977	0.134684201	0.278630272	0.093503336	0.072064044	0.073979655	0.079460231	0.07301506	0.075438825	0.073185351	0.09615062	0.081432455	0.072159297	0.074620312	0.105557755
410	0.293468141	0.189272622	0.246845979	0.290785287	0.28027807	0.106427849	0.249684398	0.1522646	0.31202606	0.189567586	0.206447101	0.310609518	0.213268724	0.193459477	0.248904887	0.082112959	0.156918601	0.077126069	0.097631592	0.243061661	0.072619254	0.113602658	0.073503108	0.151023637	0.080720084	0.308865629	0.073545642	0.072437318	0.073105828	0.075291916	0.125360532	0.072703346	0.079051537	0.127622567	0.114776115	0.113894851	0.233879342	0.085098179	0.072411762	0.07554073	0.075949205	0.072451271	0.073589959	0.072507297	0.098491166	0.077183843	0.073069498	0.076279024	0.093290077
411	0.249017485	0.156360798	0.205727224	0.246430254	0.242507561	0.094149486	0.208288148	0.127265652	0.26968218	0.156620061	0.170606757	0.265912124	0.176374252	0.159787198	0.207565168	0.0778147	0.130813176	0.074747923	0.088109682	0.202325369	0.072651502	0.099127004	0.072870824	0.126331063	0.076929965	0.264230246	0.074972012	0.073351343	0.074401126	0.073716684	0.107455423	0.073823653	0.075898835	0.109080861	0.099959056	0.099334095	0.194216802	0.079739653	0.073292683	0.077288715	0.074071814	0.072680973	0.072901092	0.072655356	0.100865428	0.074779792	0.074352379	0.078096881	0.085172532
412	0.208862579	0.130817058	0.170684524	0.206481774	0.208491488	0.086019649	0.172867487	0.109168796	0.230468386	0.131034421	0.141933639	0.224780603	0.146516262	0.133455284	0.172232779	0.07537587	0.111746085	0.073680999	0.081956101	0.167796856	0.073306661	0.089393399	0.073051471	0.108498452	0.074853849	0.22322523	0.076622972	0.074636333	0.075958461	0.073223719	0.095139703	0.075256009	0.074278168	0.096272737	0.089972867	0.089537619	0.161049852	0.076545138	0.07455402	0.079169813	0.073362873	0.07347714	0.073041331	0.073393221	0.103276144	0.07369434	0.075900849	0.080028254	0.080017504
413	0.174462392	0.112180687	0.142661681	0.17238747	0.17932521	0.08085474	0.144416306	0.096682045	0.195749488	0.112358068	0.120433601	0.188696206	0.123881362	0.11411657	0.143888727	0.074266209	0.09850077	0.07355141	0.078196264	0.140349532	0.074406239	0.083085954	0.073812281	0.09621604	0.074003398	0.187330164	0.078433741	0.076185657	0.077702278	0.073503796	0.086975719	0.076910563	0.073753134	0.087750907	0.083484927	0.083185265	0.135062301	0.074895386	0.076086452	0.081146112	0.073488812	0.074677411	0.073773302	0.074551868	0.105726733	0.073551521	0.077638336	0.082041172	0.076968547
414	0.146753174	0.099236228	0.121630065	0.145040221	0.155648149	0.077801636	0.122973174	0.088384855	0.16663175	0.099380679	0.10517474	0.15882013	0.107673149	0.10061539	0.12255277	0.074107223	0.089648148	0.074091254	0.076145265	0.119864607	0.075822894	0.07921914	0.074987202	0.088067695	0.074029275	0.157686071	0.080358518	0.077923236	0.079578954	0.07433577	0.081787246	0.078723339	0.074011044	0.082307351	0.079489682	0.079286496	0.11591872	0.074351057	0.077811965	0.083191297	0.074210864	0.076165912	0.074927653	0.076010682	0.108221222	0.074081934	0.079510478	0.084113608	0.075425124
415	0.125756689	0.090595588	0.106668916	0.124402288	0.137441009	0.07626163	0.107665593	0.083109676	0.143583934	0.090715168	0.094801107	0.135545765	0.096573912	0.091562479	0.10733771	0.074628278	0.083975773	0.07510974	0.075319321	0.10535966	0.077465905	0.077099295	0.076458022	0.082898799	0.074681892	0.134651728	0.082365337	0.079795182	0.081550865	0.075562312	0.078726343	0.080649212	0.07482881	0.079064914	0.077278386	0.077143897	0.102507101	0.074597896	0.079675273	0.085287452	0.075359119	0.077860112	0.07638383	0.077683741	0.110764236	0.075093708	0.081479116	0.08623073	0.074960739
416	0.110719992	0.085072204	0.096504772	0.109674937	0.12415277	0.075795497	0.097236065	0.079981792	0.126359853	0.085173873	0.088032739	0.118452774	0.089279752	0.085744159	0.096980144	0.075630951	0.080565491	0.0764671	0.075362218	0.095542956	0.079268889	0.07621956	0.078138056	0.07984651	0.075778362	0.117774736	0.084431472	0.081762495	0.083591092	0.077068083	0.077175344	0.082655697	0.076043027	0.077384472	0.076333436	0.076247935	0.09351102	0.075405139	0.081636335	0.087422236	0.076809055	0.079699703	0.078053424	0.079508222	0.11336096	0.076446286	0.083516936	0.088382472	0.075261264
417	0.1004382	0.081767384	0.089876585	0.099634716	0.114901613	0.076094256	0.090414765	0.078383001	0.114127942	0.081856313	0.083841688	0.106513373	0.084713907	0.082229474	0.09021161	0.0769762	0.078765387	0.078065333	0.076023499	0.0891669	0.081185688	0.076223707	0.079966704	0.078301629	0.077190517	0.10600963	0.086541824	0.083798533	0.085681567	0.078772233	0.076701087	0.084720778	0.077539155	0.076817929	0.076291124	0.076240523	0.08772664	0.076611038	0.083667768	0.089587895	0.078473361	0.081642861	0.079874614	0.081440505	0.116017223	0.078041114	0.085605588	0.090562689	0.076106053
418	0.093697558	0.080043732	0.085781779	0.093072384	0.108761673	0.076938109	0.086181754	0.077876056	0.105825575	0.080123598	0.081485988	0.098526083	0.082090945	0.080356128	0.086016468	0.078565496	0.078114957	0.079835081	0.07712544	0.085252397	0.083184214	0.076857944	0.081901471	0.077833107	0.078827528	0.09815353	0.088686554	0.085885206	0.087810332	0.080617691	0.076994935	0.086829679	0.079236042	0.077046103	0.076892296	0.076866533	0.084234557	0.078101	0.085750954	0.091779832	0.080290329	0.08366061	0.081804024	0.083450325	0.118739569	0.079808436	0.087732913	0.092767932	0.077338701
419	0.089523404	0.079456047	0.083504677	0.089027115	0.104942448	0.078172806	0.083806002	0.078152609	0.100465263	0.079529481	0.080448533	0.093442041	0.080863158	0.079661961	0.083667771	0.080329823	0.078289703	0.081728044	0.078543423	0.083103958	0.085242717	0.077943896	0.083913215	0.078136917	0.080625831	0.093165198	0.090859652	0.088010682	0.089969881	0.082564918	0.077839417	0.088972901	0.081076996	0.077844008	0.077954771	0.077946643	0.082387381	0.07979468	0.087873685	0.093995746	0.082217114	0.085733412	0.083811881	0.085517227	0.121535379	0.081699671	0.089891263	0.09499672	0.078849533
420	0.087177811	0.079667423	0.082512942	0.08677372	0.102814953	0.079680893	0.082743939	0.078978557	0.097247927	0.07973627	0.080339867	0.090442989	0.080619	0.07979759	0.082625006	0.08221641	0.079043244	0.083707446	0.080182293	0.082203938	0.087344924	0.079345986	0.085979953	0.078982245	0.082536859	0.090234821	0.093057052	0.090166357	0.092154978	0.084583911	0.079069484	0.091143658	0.083018754	0.079040906	0.079340105	0.079344563	0.081702046	0.081630593	0.090027067	0.096234486	0.084221157	0.087846701	0.08587572	0.087625938	0.124412802	0.083677824	0.092075293	0.097248553	0.080554698
421	0.086130706	0.080442953	0.082431391	0.085792433	0.101907946	0.081382012	0.08261226	0.080192175	0.095569204	0.080508508	0.080887418	0.088928628	0.081070054	0.080519162	0.082507091	0.084189962	0.08020519	0.085749101	0.081977195	0.082187757	0.089480784	0.080971261	0.088087713	0.080209684	0.084528239	0.088769531	0.095277039	0.092347426	0.09436311	0.086655167	0.080571717	0.093338384	0.085032631	0.080519427	0.080953363	0.080966847	0.081838826	0.083567372	0.092206097	0.098496353	0.086281189	0.089991595	0.087981236	0.089767091	0.127381141	0.085718559	0.094282415	0.099524191	0.082397218
422	0.086009637	0.081620522	0.082998597	0.085718354	0.101880633	0.083221267	0.083143767	0.08168236	0.094992611	0.081683707	0.081902529	0.088473466	0.082016448	0.081658275	0.08304841	0.086226975	0.081658449	0.087837225	0.083884014	0.082801517	0.091644294	0.082756083	0.090227782	0.081709738	0.086578502	0.088349444	0.0975194	0.094551515	0.096593505	0.088766144	0.082268345	0.095555565	0.08709972	0.082199071	0.082729545	0.082749518	0.082561468	0.085577282	0.094408264	0.100782576	0.088383444	0.0921629	0.090119483	0.091935159	0.130451003	0.087805983	0.096511803	0.101825204	0.08433847
423	0.086550929	0.083086139	0.084029823	0.08629315	0.102488755	0.085160384	0.084149599	0.08337106	0.095206908	0.083147613	0.083252399	0.088776156	0.083317404	0.083096487	0.084061232	0.088311562	0.083320752	0.089961417	0.08587217	0.08386586	0.093832016	0.084655953	0.092394791	0.083405486	0.088673207	0.088677189	0.099784878	0.096777788	0.098846488	0.090908752	0.084104827	0.097794988	0.089207403	0.084023368	0.084623177	0.084647835	0.083703232	0.087641428	0.096632632	0.103095004	0.090518962	0.094357754	0.092284928	0.094127041	0.133634533	0.089929623	0.098763745	0.104153717	0.086351795
424	0.087570788	0.084760485	0.085396348	0.087336727	0.10356189	0.087173207	0.085498155	0.085204054	0.095995498	0.084820734	0.084844611	0.089626968	0.084874941	0.084751379	0.085414736	0.09043337	0.085134931	0.092115193	0.087920947	0.085255825	0.096042379	0.086640306	0.094585798	0.085243501	0.090803021	0.089545775	0.102074943	0.099026539	0.101123215	0.093078127	0.0860435	0.100057408	0.091347629	0.085953291	0.08660301	0.086631061	0.085147999	0.089747334	0.098879423	0.105435994	0.092682267	0.096574998	0.094474516	0.096341407	0.136945909	0.092082941	0.101039367	0.106512318	0.088419244
425	0.088931017	0.086583367	0.087001146	0.088713665	0.104970713	0.089240047	0.087090256	0.087140145	0.097195051	0.086642737	0.086609158	0.090868189	0.086614902	0.086560434	0.087010332	0.092584872	0.087057536	0.094294024	0.090014832	0.08687719	0.098274723	0.088686072	0.09679906	0.087183193	0.092961205	0.090799536	0.104391448	0.101298625	0.103425266	0.095271016	0.088055842	0.102344063	0.093514657	0.087959273	0.088645444	0.088675997	0.086808112	0.091885836	0.101149433	0.107808199	0.094869626	0.098814302	0.096686411	0.098577792	0.140401331	0.094261369	0.103340224	0.108903887	0.090527434
426	0.090526404	0.088509683	0.088770767	0.090320903	0.106617116	0.091346775	0.088850803	0.089148815	0.098680921	0.088568423	0.088493393	0.092379445	0.088481442	0.088476758	0.088773367	0.094761155	0.089056328	0.096495265	0.092142868	0.088658654	0.100529343	0.090776554	0.099034037	0.089194505	0.095143445	0.092319709	0.106736692	0.103595521	0.105754706	0.097485732	0.090121012	0.104656737	0.095704922	0.090019674	0.090733383	0.090765844	0.088617337	0.094050779	0.103444089	0.110214639	0.097078991	0.101076213	0.098920004	0.100836639	0.144019715	0.096462231	0.105668363	0.111331658	0.092667021
427	0.092281963	0.090507553	0.090653014	0.092085002	0.108430947	0.093483914	0.09072642	0.091208706	0.100364023	0.090565842	0.09046002	0.094074827	0.090434974	0.090467185	0.09065078	0.096959415	0.091108705	0.098717768	0.094297872	0.090549561	0.102807269	0.092900411	0.101291135	0.091256417	0.09734737	0.094021549	0.109113327	0.105919183	0.108113986	0.099721832	0.092224663	0.106997641	0.097916602	0.092119571	0.092855194	0.092889191	0.090528645	0.096238461	0.105765309	0.112658636	0.099309651	0.103361957	0.101175649	0.103119091	0.147822597	0.098684354	0.108026214	0.113799164	0.094831988
428	0.094159662	0.092561549	0.092621814	0.093968744	0.110376392	0.095647822	0.092690416	0.093309941	0.102198667	0.092619533	0.092490764	0.095910475	0.092456019	0.092515609	0.092616042	0.099179524	0.093204132	0.10096229	0.096477405	0.092524634	0.105110507	0.095053027	0.103571983	0.093359228	0.099573084	0.095861827	0.111524526	0.108272233	0.110506108	0.101980464	0.094360603	0.109369588	0.100150095	0.094252468	0.095006111	0.095041382	0.092518662	0.098448276	0.108115687	0.115143998	0.101562606	0.10567366	0.103454946	0.105427226	0.15183658	0.100928486	0.110416767	0.116310431	0.097020511
429	0.09613377	0.094661724	0.094659759	0.095946963	0.112429174	0.09783676	0.094724953	0.095446437	0.104153819	0.094719524	0.094573686	0.097856637	0.094531794	0.094611609	0.094651427	0.101422237	0.095336072	0.103230245	0.098680575	0.094567028	0.107441469	0.097231981	0.105878678	0.09549698	0.101821512	0.09781123	0.113973837	0.110657649	0.112934437	0.104263338	0.096525315	0.111775748	0.102406541	0.096414637	0.097183605	0.097219971	0.094571875	0.100680633	0.110498172	0.117674975	0.103839453	0.108013841	0.105759967	0.107763519	0.15609551	0.103196031	0.112843371	0.118869959	0.099232129
430	0.098176211	0.096797016	0.096747748	0.097992195	0.114562747	0.100048561	0.096810468	0.097611307	0.106195644	0.096854727	0.096695577	0.0998809	0.096648182	0.096743611	0.096737494	0.103688117	0.097497143	0.105522919	0.100906137	0.096658246	0.109802529	0.099434363	0.108213252	0.097662918	0.104093403	0.099837807	0.116464848	0.113078418	0.115402369	0.106572067	0.09871469	0.114219308	0.104686927	0.098601741	0.09938465	0.099422017	0.096671221	0.102935717	0.112915721	0.1202559	0.106141679	0.110384991	0.108092719	0.110130412	0.160635645	0.105488263	0.115309407	0.121482346	0.101466074
431	0.100273053	0.098962568	0.098876615	0.100090829	0.116763702	0.10228319	0.098937543	0.099801936	0.108307013	0.099020265	0.098850424	0.10196703	0.098798682	0.098906486	0.098864895	0.105978732	0.099684465	0.107842349	0.103154584	0.09878945	0.112196561	0.101659726	0.110578291	0.099854499	0.106390442	0.101925566	0.119001647	0.115537982	0.117913779	0.108908919	0.100927624	0.116703921	0.106993092	0.100812548	0.101608734	0.101647059	0.098808624	0.105214859	0.115371746	0.122891712	0.108471463	0.112790083	0.110455767	0.112530838	0.165504889	0.107807216	0.117818732	0.124152845	0.103723112
432	0.102416853	0.101156465	0.101041817	0.102235619	0.119025104	0.10454175	0.101101485	0.102017795	0.110478677	0.101214216	0.101035606	0.104106211	0.100980378	0.10109815	0.101028978	0.108296281	0.10189734	0.110191108	0.105427363	0.100956294	0.114626901	0.103908904	0.112976853	0.102071236	0.108714921	0.104065836	0.121588938	0.118040295	0.120473119	0.111276662	0.103164531	0.119233782	0.109327447	0.103047395	0.103856648	0.10389592	0.100980206	0.107520087	0.11787017	0.125588169	0.110831497	0.11523256	0.112852149	0.114968196	0.170771788	0.110155454	0.12037578	0.126887604	0.106004874
433	0.104591652	0.103373002	0.103232791	0.10441097	0.121331789	0.106823965	0.103291448	0.104255708	0.11269116	0.103430856	0.103244117	0.106279876	0.103185714	0.103312591	0.103218974	0.110642258	0.104132294	0.112571198	0.107724783	0.10314858	0.117096442	0.106181163	0.115411529	0.104310037	0.111068461	0.10624033	0.124230884	0.120588849	0.123084331	0.113677547	0.105423936	0.121812599	0.111691778	0.105304665	0.106127585	0.106167846	0.103176632	0.109852639	0.120414451	0.128350323	0.113223936	0.11771542	0.115284435	0.11744544	0.176488746	0.112534976	0.122984473	0.129692003	0.108311973
434	0.106799239	0.105614415	0.105451543	0.106618686	0.123685544	0.109132513	0.105509428	0.106518068	0.114946126	0.105672419	0.105478126	0.108489727	0.105416832	0.105552025	0.105436878	0.113019765	0.106391697	0.114985969	0.11004962	0.105368329	0.119609249	0.108479116	0.117886092	0.106573299	0.113454218	0.108450758	0.12693322	0.123188427	0.125752823	0.116115081	0.107708374	0.124445453	0.11408932	0.107586878	0.108424149	0.10846545	0.105399961	0.112215522	0.123009331	0.131185298	0.115652222	0.120242844	0.117756379	0.119966702	0.182762596	0.114949125	0.125650195	0.132573698	0.110647249
435	0.109036118	0.107880585	0.107696337	0.108855389	0.126083156	0.111469239	0.107753596	0.108805627	0.117238944	0.107938781	0.107737075	0.110731424	0.107672991	0.107816231	0.107680889	0.115431511	0.108676197	0.117438477	0.112403973	0.107613928	0.122169208	0.110804423	0.12040411	0.108861802	0.115874984	0.110692874	0.129701529	0.12584366	0.128483856	0.118592518	0.110019215	0.127137275	0.116522974	0.109895352	0.110747969	0.110790383	0.107648865	0.114611298	0.125659399	0.13410005	0.118119531	0.122818842	0.120271528	0.122535943	0.189702633	0.117400953	0.128378179	0.135540164	0.11301294
436	0.111304061	0.110173782	0.109969182	0.111122867	0.128526533	0.113836962	0.110025949	0.111120845	0.119571259	0.11023221	0.110023158	0.113006637	0.109956353	0.110107459	0.109953006	0.117880858	0.110988226	0.119932392	0.114790789	0.109887401	0.124780887	0.113159824	0.122969785	0.111178014	0.118334187	0.112968356	0.132542475	0.128560013	0.13128368	0.121113728	0.112359098	0.129893902	0.118996264	0.112232707	0.113101775	0.113145383	0.109925412	0.117043209	0.128370068	0.137103015	0.12062965	0.125448125	0.12283406	0.125157812	0.197472625	0.119894125	0.131174645	0.138600521	0.115412075
437	0.113603157	0.112495563	0.112270908	0.113421256	0.131016096	0.116238331	0.112327275	0.113465712	0.121942747	0.11255426	0.112337725	0.11531511	0.112268187	0.112427217	0.112254029	0.120371194	0.113329718	0.122471479	0.117212905	0.112189631	0.127449083	0.115547841	0.125587502	0.11352394	0.1208353	0.115276986	0.135463214	0.131343294	0.134158989	0.123682708	0.11473036	0.132721563	0.121512782	0.114601249	0.115488067	0.115532966	0.112230606	0.119514496	0.13114709	0.140203347	0.123186485	0.128135653	0.125448334	0.127837203	0.206280339	0.1224324	0.134046251	0.141764697	0.117847606
438	0.115933671	0.11484762	0.114602494	0.115750871	0.133552544	0.118676161	0.114658517	0.115842359	0.124353325	0.114906618	0.114682266	0.117656788	0.114609899	0.114777147	0.114584909	0.122906147	0.115702747	0.125059784	0.119673343	0.11452165	0.130179017	0.117971154	0.128262007	0.115901725	0.123382046	0.117618743	0.138471691	0.134199886	0.13711719	0.126303769	0.117135492	0.135627123	0.124076381	0.117003436	0.117909505	0.117955807	0.114565601	0.122028621	0.133996779	0.143411338	0.125794239	0.130886833	0.128119066	0.130579447	0.216407371	0.125019818	0.137000359	0.145043899	0.120322678
439	0.118296526	0.11723201	0.116965415	0.118112666	0.136137293	0.121153545	0.117021118	0.118253223	0.126803704	0.11729134	0.117058669	0.120032353	0.116983311	0.117159266	0.116947099	0.125489667	0.1181097	0.127701728	0.122175404	0.116884969	0.132976448	0.12043272	0.130998517	0.11831382	0.125978477	0.119994338	0.141576856	0.1371369	0.140166595	0.128981627	0.119577266	0.138618263	0.126691262	0.119442006	0.120369024	0.120416858	0.116932005	0.124589356	0.136926166	0.146738733	0.128457508	0.133707642	0.130851437	0.133390428	0.228246247	0.127660793	0.140045234	0.148450972	0.122840725
440	0.120693499	0.119651258	0.119361788	0.120508441	0.138772665	0.123673913	0.119417175	0.120701133	0.129295626	0.119710948	0.119469335	0.122443454	0.119390774	0.119576067	0.119342702	0.128126092	0.120553363	0.130402169	0.124722731	0.119281734	0.13584777	0.122935837	0.133802799	0.120763067	0.128629048	0.122405433	0.14478886	0.140162308	0.143316598	0.131721477	0.122058804	0.141703623	0.129362039	0.121920054	0.122869902	0.122919412	0.119332029	0.12720084	0.139943134	0.150199037	0.131181351	0.136604723	0.133651174	0.136276687	0.242362815	0.130360174	0.14319021	0.152000754	0.125405523
441	0.123126806	0.122108176	0.121794081	0.122940425	0.141461502	0.126240977	0.121849141	0.123189185	0.131831363	0.122168252	0.121916965	0.124892226	0.121834949	0.122030335	0.121774173	0.130820131	0.123036791	0.133166404	0.127319264	0.121714434	0.138800036	0.125484077	0.136681182	0.123252571	0.131338594	0.124854174	0.148119141	0.143284994	0.146577746	0.134528999	0.124583495	0.144892869	0.132093732	0.124440938	0.125415689	0.125467035	0.121768212	0.129867561	0.143056457	0.153807679	0.13397129	0.139585418	0.136524562	0.139245447	0.259571893	0.13312325	0.146445764	0.155710275	0.12802116
442	0.125598904	0.124605795	0.124264982	0.125411087	0.144206997	0.128858741	0.124319689	0.125720708	0.134413492	0.12466628	0.124404479	0.127381064	0.124318713	0.124525071	0.124244189	0.133576916	0.125563269	0.13600024	0.129969264	0.124185774	0.141841088	0.12808129	0.139640669	0.125785675	0.134112395	0.127342966	0.151580717	0.146514946	0.149961996	0.137410438	0.127154991	0.148196914	0.134891831	0.127008276	0.128010212	0.12806357	0.124243313	0.132594403	0.146275996	0.157582475	0.136833393	0.142657907	0.139478548	0.142304745	0.281077983	0.135955815	0.149823773	0.159599293	0.130692066
443	0.128112557	0.127147419	0.126777455	0.127923197	0.147012766	0.131531574	0.12683177	0.128299322	0.137044966	0.127208336	0.126935066	0.129912689	0.126845214	0.127063551	0.126755702	0.136402107	0.12813637	0.138910117	0.132677392	0.126698739	0.144979755	0.13073167	0.1426891	0.128366011	0.136956282	0.129874539	0.15518863	0.149863551	0.153483105	0.14037275	0.129777259	0.151628252	0.137762409	0.129625999	0.130657637	0.130713206	0.126760363	0.135386734	0.149612988	0.161544349	0.139774407	0.145831419	0.142520912	0.145463647	0.30875076	0.138864299	0.153337891	0.163691142	0.133423089
444	0.130670795	0.129736617	0.129334719	0.130479795	0.149882815	0.134264223	0.12938859	0.13092894	0.139729062	0.129797986	0.129512176	0.132490109	0.129417857	0.129649314	0.129311923	0.13930192	0.130759953	0.141903152	0.13544872	0.129256565	0.14822594	0.133439766	0.145835216	0.130997505	0.139876665	0.132451906	0.158960177	0.153343728	0.15715682	0.143423645	0.132454598	0.155201124	0.140712155	0.132298367	0.133362484	0.133420483	0.12932265	0.138250439	0.153080169	0.165717756	0.142801799	0.149116325	0.14566032	0.148732327	0.345483788	0.141855804	0.15700375	0.168013244	0.136219518
445	0.133276932	0.132377261	0.131940273	0.133084201	0.152821562	0.137061877	0.131993633	0.133613808	0.142469402	0.1324391	0.132139549	0.135116626	0.132040337	0.132286196	0.131916338	0.142283238	0.133438209	0.14498728	0.138288815	0.131862769	0.151590858	0.136210543	0.149088861	0.133684422	0.142880655	0.135078375	0.162915504	0.156970308	0.1610014	0.146571755	0.135191691	0.158931954	0.143748507	0.135030014	0.136129685	0.13619036	0.131933741	0.141192016	0.156692154	0.170131693	0.145923915	0.152524401	0.148906531	0.152122329	0.395831822	0.144938248	0.16083946	0.17259831	0.139087167
446	0.135934567	0.135073546	0.134597905	0.135740018	0.155833861	0.139930223	0.134650674	0.136358544	0.145269948	0.135135871	0.134821237	0.137795835	0.134716654	0.134978355	0.134572723	0.145353705	0.136175689	0.148171365	0.141203796	0.134521158	0.155087251	0.139049434	0.152461147	0.136431394	0.14597616	0.137757548	0.167078151	0.16076036	0.165038074	0.149826762	0.137993644	0.162839745	0.146879751	0.137825996	0.138964631	0.139028256	0.1345975	0.144218662	0.160465749	0.174820677	0.149150105	0.156069053	0.152270556	0.155646783	0.46666291	0.148120476	0.164866075	0.17748553	0.142032441
447	0.138647614	0.137830035	0.137311727	0.138451165	0.158925039	0.14287553	0.137363809	0.139168187	0.148135037	0.13789286	0.137561643	0.140531653	0.137451153	0.137730312	0.137285178	0.148521862	0.138977361	0.151465389	0.144200429	0.137235866	0.158729716	0.141962411	0.155964722	0.139243482	0.149172031	0.140493346	0.171475928	0.164733726	0.16929179	0.153199615	0.14086606	0.166946699	0.150115183	0.140691855	0.141873251	0.141940135	0.137318122	0.147338397	0.164420476	0.179826327	0.15249092	0.159765678	0.155764921	0.159320753	0.566893422	0.151412447	0.169108324	0.18272248	0.145062435
448	0.141420325	0.140651705	0.140086208	0.141221899	0.162100942	0.145904728	0.140137489	0.142048256	0.151069403	0.14071504	0.140365562	0.14332834	0.140248565	0.140546997	0.140058156	0.151797294	0.141848658	0.154880631	0.147286223	0.140011387	0.162535048	0.144956063	0.159614037	0.142126229	0.152478215	0.143290038	0.176141888	0.168913582	0.17379203	0.156702737	0.1438151	0.171278902	0.153465276	0.143633684	0.144862083	0.144932573	0.140100166	0.150560192	0.168579119	0.185199184	0.155958316	0.163632041	0.159403932	0.1631616	0.70141045	0.154825414	0.173595419	0.188367374	0.148185044
449	0.144257325	0.143543999	0.142926217	0.144056851	0.16536799	0.149025512	0.142976565	0.145004813	0.154078224	0.143607851	0.143238229	0.146190535	0.143114053	0.143433798	0.142896509	0.155190802	0.144795546	0.158429905	0.150469546	0.142852613	0.166522701	0.148037692	0.163425709	0.145085723	0.155905947	0.146152268	0.181115651	0.173327205	0.178573925	0.160350311	0.146847567	0.175867237	0.156941883	0.146658205	0.147938367	0.148012854	0.142948604	0.153894127	0.172968468	0.191001259	0.159565914	0.167688768	0.163204033	0.167189463	0.850676698	0.158372157	0.17836215	0.194492205	0.151409084
450	0.14716366	0.146512891	0.145837071	0.146961074	0.168733249	0.152246465	0.145886331	0.148044549	0.157167164	0.146577264	0.146185384	0.149123299	0.146053272	0.146396628	0.145805539	0.158714632	0.147824604	0.162127852	0.153759769	0.145764895	0.170715351	0.151215418	0.167418959	0.148128684	0.159467981	0.149085103	0.186445133	0.178006936	0.183679685	0.164158617	0.149971008	0.180748563	0.1605585	0.149772875	0.151110155	0.151189083	0.145868872	0.157351592	0.177620261	0.197309445	0.163329318	0.171959979	0.167184232	0.171427861	0.957754602	0.162067278	0.183450298	0.201187023	0.154744455
451	0.150144851	0.149564969	0.148824603	0.149940092	0.172204511	0.15557721	0.148872594	0.151174874	0.160342439	0.149629862	0.149213339	0.152132167	0.149072439	0.149442001	0.148791054	0.16238274	0.150943114	0.165991301	0.157167442	0.148754098	0.175139636	0.154498326	0.171616181	0.151262559	0.163178886	0.152094089	0.192188891	0.182991471	0.189160537	0.168146469	0.153193832	0.185967283	0.16433058	0.152985994	0.154386446	0.154470321	0.148866936	0.160945525	0.182572431	0.204220295	0.16726653	0.176474094	0.171366667	0.17590447	0.985296813	0.165927564	0.188910541	0.208565972	0.158202328
452	0.153206947	0.152707516	0.151895223	0.152999965	0.175790391	0.159028575	0.151941737	0.15440403	0.163610884	0.152772921	0.152329061	0.155223207	0.15217841	0.152577119	0.151859442	0.166211111	0.154159166	0.170039703	0.160704489	0.151826673	0.179827043	0.157896609	0.176043617	0.154495629	0.16705538	0.155185303	0.198419115	0.18832744	0.195079164	0.172335725	0.156525444	0.19157731	0.168275907	0.15630684	0.157777339	0.15786674	0.151949363	0.164690689	0.187870643	0.211856354	0.171398412	0.181264817	0.17577726	0.180652071	0.958075638	0.169972406	0.194804851	0.216775389	0.161795363
453	0.15635661	0.155948621	0.155056011	0.156147364	0.179500437	0.162612814	0.155100805	0.157741222	0.166980034	0.156014525	0.155540274	0.158403094	0.15537878	0.155809973	0.155017753	0.170218167	0.157481792	0.174295687	0.164384461	0.154989746	0.184815108	0.16142177	0.180732258	0.157837151	0.171116775	0.15836543	0.205225857	0.194071606	0.201513127	0.176751966	0.159976416	0.197644793	0.172415085	0.159745838	0.161294222	0.161389812	0.155123408	0.168604037	0.193570419	0.220375375	0.175749329	0.186372468	0.180446612	0.185709823	0.908665068	0.174224366	0.201209867	0.226005726	0.165537991
454	0.159601195	0.159297312	0.158314812	0.159389656	0.183345274	0.166343869	0.158357603	0.16119679	0.170458226	0.159363694	0.158855574	0.161679197	0.158681995	0.159149479	0.158273802	0.174425285	0.160921121	0.178785777	0.168222856	0.158251217	0.190148983	0.165086861	0.185719013	0.161297517	0.175385528	0.161641852	0.212722882	0.2002938	0.208559562	0.181425359	0.163558695	0.204251819	0.176772149	0.16331476	0.16495001	0.165052554	0.158397128	0.172705159	0.199739979	0.229983564	0.180347941	0.191845734	0.185411137	0.191124938	0.850743015	0.178709887	0.208221495	0.236508882	0.169446762
455	0.162948851	0.162763694	0.161680349	0.162735003	0.187336746	0.17023767	0.161720809	0.164782376	0.174054709	0.162830521	0.162284564	0.165059669	0.162097482	0.16260561	0.161636272	0.178857392	0.164488556	0.183541235	0.172237466	0.161619874	0.195883369	0.168906746	0.191048121	0.16488844	0.179887894	0.165022737	0.221055409	0.207080671	0.216341304	0.186391691	0.167285832	0.21150119	0.181375294	0.167026949	0.168759403	0.16886979	0.16177949	0.177016803	0.206463864	0.240953875	0.185228162	0.19774384	0.19071446	0.19695475	0.790270368	0.183460126	0.215960934	0.248622484	0.17354074
456	0.166408642	0.166359141	0.16516237	0.166192488	0.191488114	0.174312538	0.165200114	0.168511179	0.177779779	0.16642637	0.165838022	0.168553573	0.165635813	0.166189582	0.165114866	0.183543791	0.168197001	0.188599234	0.176448864	0.165105536	0.202085266	0.172898465	0.196773153	0.168623193	0.184654813	0.168517167	0.230411656	0.214541137	0.225015963	0.191693814	0.171173294	0.219523423	0.186257865	0.170897621	0.172739247	0.17285851	0.165280526	0.181565591	0.213848187	0.253654151	0.190430485	0.204139641	0.196409359	0.203269668	0.729725375	0.188512128	0.224583566	0.262807578	0.177842039
457	0.169990692	0.170096512	0.168771806	0.169772256	0.195814271	0.178589665	0.168806386	0.172398226	0.181644946	0.170164085	0.169528105	0.172171023	0.169308899	0.169914072	0.168720466	0.188519179	0.17206114	0.194004328	0.180880987	0.168719228	0.208837579	0.177081665	0.202959581	0.172516899	0.189723026	0.172135275	0.241039121	0.22281378	0.234788552	0.197383477	0.175238828	0.228486378	0.191459607	0.174944227	0.176908948	0.1770383	0.168911509	0.18638289	0.222027755	0.268588461	0.196003668	0.211123715	0.202560294	0.210157058	0.670114699	0.193910285	0.234291335	0.27970458	0.18237648
458	0.173706345	0.173990407	0.172520969	0.173485679	0.200331998	0.183093697	0.172551858	0.176460706	0.185663107	0.174058246	0.173368571	0.175923333	0.173130211	0.173793457	0.172465319	0.193824905	0.176097748	0.19981031	0.185561835	0.172473366	0.216243855	0.181479105	0.20968811	0.17658686	0.195136446	0.175888401	0.253267551	0.232076913	0.245929118	0.20352366	0.179502897	0.238608527	0.197028222	0.179186865	0.181290979	0.181431846	0.172685149	0.191505893	0.231175737	0.28645742	0.20200686	0.218809761	0.20924665	0.217726369	0.611858221	0.199708186	0.245350007	0.3002154	0.187174383
459	0.17756837	0.178057488	0.176423786	0.177345558	0.205060269	0.187853488	0.176450366	0.180718392	0.189848778	0.178125493	0.177375078	0.179823222	0.177115057	0.177844136	0.17636328	0.199510671	0.180326096	0.20608274	0.190524401	0.176382006	0.224434973	0.186117332	0.217059315	0.180852984	0.200948022	0.179789295	0.267543274	0.242563197	0.258798858	0.210191778	0.18398924	0.250178409	0.203021474	0.183648838	0.185911529	0.186065604	0.176615854	0.196979059	0.24151769	0.30824993	0.208512521	0.227342267	0.216567273	0.226116383	0.555070833	0.205971129	0.25811472	0.325627667	0.192271617
460	0.181591206	0.182316879	0.180496096	0.181366376	0.210020634	0.192903072	0.180517636	0.185194178	0.194218367	0.182384923	0.181565542	0.183885052	0.181280939	0.182084916	0.1804301	0.205636776	0.184768471	0.212902356	0.195807868	0.18046114	0.23357855	0.191027528	0.225200062	0.185338328	0.207222216	0.183852353	0.284480489	0.254580872	0.273888849	0.217484054	0.18872559	0.263583205	0.209510016	0.188357338	0.190801345	0.190970647	0.180720036	0.202856011	0.253351886	0.335379558	0.215610387	0.236907345	0.224646722	0.23550545	0.49971155	0.212779513	0.273067841	0.357794411	0.197710962
461	0.185791251	0.186790646	0.18475599	0.185564583	0.21523765	0.19828286	0.184771627	0.189914709	0.198790485	0.186858563	0.18596056	0.188125101	0.18564795	0.186537477	0.184683768	0.212276994	0.189450774	0.22036953	0.201459101	0.184729046	0.243891818	0.196246558	0.234272142	0.190069737	0.214038179	0.188093897	0.304935546	0.268543864	0.291875939	0.225521286	0.193744539	0.279349674	0.216581033	0.193344292	0.195996741	0.196183698	0.185016478	0.209201945	0.2670781	0.369869469	0.22341267	0.247747683	0.233643686	0.246125564	0.445686187	0.220233265	0.290873596	0.399355354	0.20354382
462	0.190187202	0.191504378	0.189224235	0.189958943	0.220739398	0.204041182	0.189232939	0.194911187	0.203586328	0.19157196	0.190583936	0.192561899	0.190239283	0.19122694	0.189144921	0.219522429	0.194403295	0.228610331	0.207534584	0.189206717	0.255659944	0.201818305	0.244484369	0.195078661	0.221494034	0.192532508	0.330114569	0.285015654	0.313704451	0.234456802	0.199084641	0.29820405	0.224343185	0.198647427	0.201540918	0.201748469	0.189526783	0.216096832	0.283239515	0.4145624	0.232061213	0.260183892	0.243762751	0.25828243	0.392950441	0.228457866	0.312457938	0.453900612	0.209832448
463	0.194800491	0.196487942	0.193924795	0.194570973	0.226558121	0.210236316	0.193925335	0.2002204	0.208630143	0.19655492	0.195463346	0.197216638	0.195081868	0.196182596	0.19383737	0.227486747	0.199661686	0.237784928	0.214102993	0.193918395	0.269262383	0.20779542	0.256109744	0.200402189	0.229712712	0.197189444	0.361722336	0.304773413	0.340703117	0.244487572	0.204791844	0.321159217	0.232933374	0.204311657	0.207485659	0.207717389	0.194275936	0.223639738	0.302583975	0.473198657	0.241737429	0.274645386	0.25527109	0.272384436	0.34163723	0.2376127	0.339123081	0.525654932	0.21665293
464	0.199655812	0.201776418	0.198885483	0.199425471	0.232730991	0.21693914	0.198876383	0.205886025	0.213949789	0.201842452	0.200631164	0.202113674	0.200207159	0.201438814	0.198788743	0.236313328	0.205268213	0.248099272	0.221248599	0.198892236	0.285210937	0.214241607	0.269509982	0.206084381	0.238849966	0.202089138	0.402138636	0.328900052	0.374739794	0.255869852	0.210921345	0.349636762	0.242526092	0.210390869	0.213893561	0.21415388	0.199293003	0.23195468	0.326152094	0.549769294	0.252676249	0.291715073	0.268522278	0.288984555	0.292209168	0.247902654	0.372699955	0.617388073	0.224099151
465	0.204781751	0.207411272	0.204138759	0.204551162	0.239301014	0.224236605	0.204118235	0.211960293	0.219577419	0.207475927	0.206125489	0.207281135	0.205652118	0.207036176	0.204031269	0.246184978	0.211273323	0.259821284	0.229075753	0.204161124	0.304203848	0.221234566	0.285170198	0.21217794	0.249105297	0.207259816	0.454520164	0.358908002	0.4183795	0.268941052	0.217539957	0.385618465	0.253346261	0.216950211	0.220840898	0.221135281	0.204611989	0.24119851	0.355396588	0.645574137	0.265185538	0.312192795	0.28398998	0.308839874	0.245596459	0.259594195	0.415707431	0.724282795	0.232288052
466	0.210211581	0.213441847	0.209722727	0.209981492	0.246318117	0.23223633	0.209688614	0.218506117	0.225550298	0.213504564	0.211991447	0.212751664	0.211460449	0.213022915	0.209602767	0.257337367	0.217737672	0.273303586	0.237714914	0.209763694	0.32720179	0.228869906	0.303748191	0.218746385	0.26073714	0.212734239	0.522462536	0.396883447	0.474892333	0.284150679	0.224729229	0.431776518	0.265687136	0.224069087	0.228421426	0.228756727	0.210272917	0.251571747	0.392324627	0.752115453	0.279673508	0.337183517	0.302315794	0.332994774	0.203209014	0.273037935	0.471376087	0.825638185	0.241366747
467	0.215984274	0.219927328	0.215682428	0.215755655	0.253840506	0.241072954	0.215632081	0.225599961	0.231911849	0.21998739	0.218282898	0.218563369	0.217684227	0.219456817	0.215547927	0.270078184	0.22473483	0.289016261	0.247331027	0.215745654	0.35553166	0.237266479	0.326144757	0.225866951	0.27408458	0.218550664	0.608183249	0.445579129	0.547597125	0.302104992	0.232589663	0.491375949	0.279936028	0.231845219	0.23675156	0.237136452	0.216323234	0.263333927	0.439602768	0.844853986	0.296688282	0.368213917	0.324377648	0.362892573	0.166647656	0.288701159	0.54305367	0.890738376	0.251522468
468	0.222145679	0.226939141	0.222071385	0.221919792	0.261936159	0.250916302	0.222001552	0.233335387	0.238712841	0.226995618	0.225064495	0.224760928	0.224385842	0.226407524	0.221919828	0.284812775	0.232354629	0.307590883	0.258134446	0.222161372	0.391001638	0.246573212	0.353593342	0.233634192	0.289596487	0.224753957	0.707565963	0.50816891	0.637293373	0.323626549	0.241246061	0.567303234	0.296608862	0.240399767	0.245977	0.246422559	0.22281949	0.276824028	0.500372091	0.895800391	0.316970891	0.407347674	0.351377432	0.40049207	0.137075691	0.307211542	0.631793605	0.905640499	0.262995613
469	0.228750113	0.234564246	0.22895369	0.228528595	0.27068474	0.261982999	0.228860345	0.241827996	0.246012958	0.23461593	0.232414508	0.231397057	0.231640678	0.233959708	0.228782001	0.302081145	0.240707809	0.329882876	0.27039657	0.229076016	0.435981674	0.256978777	0.387767839	0.242164998	0.307873493	0.231397069	0.803459023	0.586930887	0.736476622	0.349835882	0.250855036	0.658901613	0.316399755	0.249884536	0.256282099	0.25680262	0.229829621	0.292489974	0.577115948	0.898811284	0.34152913	0.457214514	0.384947929	0.448322192	0.114650621	0.329419113	0.730754012	0.882577791	0.276098503
470	0.23586229	0.242909319	0.236406589	0.235647271	0.280179725	0.274551984	0.236284716	0.251221814	0.253882645	0.242954624	0.240428377	0.238534289	0.23954046	0.242217083	0.236210985	0.322607456	0.249932016	0.357050109	0.284470879	0.23656822	0.493242624	0.268724432	0.430854103	0.251605086	0.329723761	0.238542832	0.86932607	0.679504461	0.824430276	0.382244966	0.2616149	0.755950791	0.340245855	0.260491425	0.267902283	0.268516406	0.237435793	0.310928394	0.668271503	0.869323553	0.371726221	0.520631551	0.427229653	0.509204852	0.098538515	0.356474474	0.819954449	0.839444621	0.291240678
471	0.243559743	0.252106195	0.244523793	0.243354002	0.29053079	0.288985437	0.244367091	0.261697737	0.26240534	0.252143034	0.249223312	0.246247174	0.248197585	0.251307628	0.244299579	0.347363568	0.260199705	0.390636955	0.300821355	0.244733485	0.565027227	0.28212131	0.485422744	0.262137583	0.356232951	0.246266178	0.889886906	0.773132983	0.876422986	0.422825594	0.273778906	0.836124236	0.369405076	0.272465085	0.281140765	0.281873026	0.245738048	0.332937054	0.762543218	0.823330578	0.409360709	0.599069521	0.480768755	0.584991963	0.087436476	0.389912899	0.87439573	0.78680191	0.308963009
472	0.251936043	0.262319348	0.253419927	0.251743218	0.301866567	0.305757979	0.253220424	0.27348525	0.271680332	0.262344943	0.258944563	0.254625184	0.257751014	0.261390743	0.253161236	0.377644433	0.2717291	0.432620459	0.320061795	0.253688778	0.650339398	0.297574592	0.553663568	0.27399494	0.388841887	0.25465707	0.872513486	0.844787447	0.884196405	0.473931636	0.287673742	0.877550332	0.405530385	0.286120582	0.296391905	0.297274901	0.254859235	0.359581913	0.837714376	0.769484184	0.456655211	0.688878836	0.547827438	0.673229296	0.080068715	0.431702136	0.884524927	0.729850902	0.329984334
473	0.261104558	0.273755081	0.263235876	0.260929432	0.314337052	0.325492758	0.262983412	0.286877052	0.281825875	0.27376571	0.269773079	0.263776057	0.268373449	0.272666038	0.262935322	0.415119306	0.284797839	0.485259071	0.343002946	0.263578051	0.740282668	0.315613701	0.635150827	0.28747381	0.429380367	0.263823875	0.833297963	0.876158209	0.859189791	0.537727779	0.303722736	0.876912144	0.450657774	0.301865556	0.3141704	0.315247691	0.264950961	0.392259958	0.874022569	0.712146919	0.515895346	0.776576578	0.628303767	0.762329011	0.075407316	0.484097431	0.860983717	0.671311528	0.355255514
474	0.271203665	0.286674538	0.274146275	0.271052558	0.328116012	0.3490091	0.273827802	0.302249734	0.292983264	0.286665178	0.281936325	0.273830377	0.28028145	0.285385766	0.273794492	0.461782455	0.299762282	0.55038485	0.370709921	0.27458	0.815973433	0.336933338	0.722676555	0.302956068	0.479942639	0.273898	0.783226293	0.868350029	0.816383574	0.614447963	0.322478135	0.84743788	0.506918281	0.320231135	0.335151084	0.336481023	0.276201955	0.432724048	0.870197505	0.653595209	0.588173673	0.840705266	0.715691912	0.831594963	0.07269085	0.548950997	0.818935108	0.612530292	0.386019375
475	0.2824029	0.301409731	0.286368589	0.282284202	0.343401688	0.377370353	0.285967234	0.320089054	0.305321075	0.301373547	0.295721544	0.284946871	0.293747834	0.299870123	0.285953622	0.519557005	0.317081167	0.627453556	0.404544351	0.286917469	0.857978624	0.3624385	0.799587182	0.320934483	0.542273587	0.285039237	0.72788779	0.835245133	0.764686013	0.698904966	0.344658858	0.802613384	0.575501608	0.341908342	0.360212983	0.361873266	0.288848249	0.482929787	0.839401568	0.594967556	0.670507059	0.866226331	0.794048195	0.863839065	0.071370903	0.625795057	0.767624034	0.554173845	0.42383462
476	0.294910688	0.318383999	0.300174739	0.294835587	0.360414753	0.411912458	0.299668555	0.341020959	0.319039745	0.318311645	0.311492764	0.297318937	0.309117586	0.316526829	0.299681247	0.589083965	0.337344896	0.710066569	0.446138903	0.300869533	0.861402132	0.393284098	0.846665616	0.342044135	0.616099174	0.297442371	0.67029702	0.78879469	0.708722098	0.777286249	0.371191268	0.750069151	0.65423958	0.367788229	0.390479405	0.392571285	0.303186233	0.544409785	0.794165281	0.536836317	0.752106726	0.855761255	0.843908045	0.858715969	0.071054828	0.708387122	0.71184307	0.496584574	0.470473466
477	0.308984295	0.338137915	0.315906282	0.308967781	0.379390733	0.454188476	0.315266592	0.365846735	0.334376152	0.338016557	0.329712691	0.311182834	0.326828434	0.335876031	0.31531451	0.667096152	0.361309536	0.783661843	0.497152331	0.316787255	0.836180781	0.430873235	0.856409559	0.367097724	0.695987615	0.311345471	0.612029616	0.735586315	0.650994988	0.831127833	0.403238378	0.693833434	0.734118854	0.398993417	0.427321637	0.429970149	0.319589678	0.616602782	0.741584205	0.479504056	0.815216771	0.822032878	0.856509703	0.828148588	0.071461962	0.782317857	0.654186938	0.439974558	0.52745111
478	0.32493937	0.361352015	0.333989313	0.325001558	0.40056193	0.505664626	0.333178642	0.395561344	0.351605075	0.361164103	0.350963076	0.326825078	0.347430299	0.358572592	0.333273854	0.743585961	0.38991736	0.831087502	0.558503863	0.335109171	0.79451033	0.476706938	0.835963488	0.397103066	0.769191936	0.327037374	0.553903946	0.679194377	0.592835192	0.849626571	0.442159568	0.636129517	0.799300647	0.436848886	0.472226929	0.475567636	0.338526282	0.694097148	0.685489695	0.423192832	0.845439426	0.775771358	0.838055513	0.783576434	0.072389119	0.830390071	0.596039176	0.384589694	0.594795974
479	0.343161425	0.38886581	0.354951929	0.343329291	0.424123899	0.566909211	0.353921537	0.431335933	0.371037555	0.388587619	0.375965139	0.344590916	0.371605684	0.385425862	0.354080333	0.802795775	0.424289433	0.843911256	0.628724867	0.356379324	0.744249272	0.53191198	0.797342117	0.433242415	0.819299541	0.344866278	0.496354363	0.621562782	0.534926639	0.836305305	0.489314352	0.578117639	0.834788917	0.482716239	0.526370724	0.530503603	0.360576491	0.764671775	0.627972191	0.368200212	0.841637365	0.723055547	0.800561463	0.731755583	0.073690042	0.843903419	0.538110375	0.330869978	0.668797151
480	0.364115385	0.421666357	0.379437176	0.364424957	0.450173344	0.635852765	0.378124515	0.474377966	0.393009346	0.421266734	0.405583183	0.364890098	0.400176684	0.417393203	0.378368715	0.831842349	0.465617213	0.827263364	0.701433043	0.381260292	0.689592252	0.596063753	0.748942727	0.476723305	0.836767386	0.365245564	0.439661967	0.56371118	0.477649762	0.802276475	0.545462937	0.520404227	0.837022387	0.537466214	0.589526826	0.594405322	0.386445494	0.812910622	0.570134159	0.315073781	0.813517923	0.667168022	0.752777167	0.676305843	0.075259866	0.827760708	0.480792883	0.279624302	0.739646098
481	0.388342331	0.460782474	0.408191088	0.388841055	0.478612394	0.70565988	0.406518459	0.525503436	0.41784911	0.460223153	0.440768205	0.38819059	0.434061101	0.455489227	0.406876639	0.829291815	0.514807784	0.791639384	0.764644656	0.410519449	0.632932126	0.665244292	0.695437381	0.528330269	0.824437746	0.388647384	0.38413304	0.506204002	0.421294645	0.756664369	0.609488671	0.463356946	0.813470463	0.600313943	0.658202923	0.663464581	0.416943035	0.829926536	0.512581932	0.264767395	0.771220951	0.609977791	0.69959834	0.619294381	0.077022832	0.792435431	0.424378872	0.232131513	0.793325196
482	0.416435691	0.507008904	0.442006278	0.41718435	0.509021379	0.764618052	0.43988315	0.584271394	0.445818827	0.50624911	0.482391868	0.414994001	0.474135373	0.500542279	0.440391091	0.803100648	0.571739133	0.745453247	0.805142919	0.444967137	0.575596742	0.730571907	0.639470773	0.587527538	0.791920292	0.415577586	0.330259162	0.449397125	0.366220026	0.704881401	0.676652414	0.40728194	0.774198368	0.66713259	0.724063958	0.728937801	0.45290494	0.818062008	0.455687963	0.218699283	0.721279852	0.552503458	0.643789928	0.561854803	0.078924807	0.74641562	0.369219652	0.190041498	0.818875226
483	0.448966467	0.560236711	0.481552396	0.450038892	0.540479968	0.80078852	0.478887732	0.647417008	0.476993021	0.559248142	0.530813033	0.445767009	0.520867138	0.552591394	0.479586192	0.762632125	0.633830611	0.693513023	0.816607856	0.485272416	0.518298903	0.779769945	0.582510671	0.650862113	0.747750963	0.446505756	0.278901548	0.393624298	0.313037296	0.649905765	0.737427518	0.352600927	0.72615958	0.729055098	0.775043035	0.778596128	0.494967149	0.786387839	0.399781814	0.178567194	0.667275919	0.495302687	0.586890807	0.504600762	0.080928116	0.694566407	0.315909143	0.15491045	0.815449366
484	0.486317825	0.618450302	0.527025677	0.487794783	0.571477519	0.808988511	0.523758337	0.70784319	0.511092105	0.617245511	0.585135654	0.480801765	0.573659634	0.609947586	0.524684983	0.714199018	0.694887474	0.638640535	0.802089686	0.531586211	0.461491779	0.80349757	0.525407274	0.711010794	0.697191984	0.481722898	0.231369639	0.339371946	0.262750537	0.593517744	0.780414744	0.300016467	0.673414267	0.77477748	0.801322036	0.802971786	0.543121074	0.743053104	0.345326578	0.14576099	0.611346974	0.438764753	0.529792439	0.447942709	0.083006076	0.639740567	0.265426925	0.127512574	0.789886785
485	0.528358574	0.67649321	0.577486262	0.53030934	0.59988721	0.792878516	0.573645617	0.755467124	0.547220167	0.675161766	0.642069938	0.519949113	0.629788102	0.667956606	0.574816024	0.661398602	0.745344849	0.582438463	0.769707108	0.582835354	0.405548308	0.800640384	0.468660685	0.757797951	0.643207742	0.52106953	0.189337668	0.287456217	0.216831364	0.536703493	0.798161003	0.250669115	0.618263886	0.7960429	0.800924826	0.800732078	0.595907653	0.693171511	0.293095881	0.120686029	0.55468908	0.38327674	0.473013171	0.392257963	0.085140775	0.58355879	0.219222226	0.107431772	0.750541863
486	0.57396754	0.726273749	0.63006882	0.576413789	0.62324135	0.759979553	0.625853884	0.781690819	0.583648161	0.724988161	0.695370003	0.562244392	0.683693216	0.718951844	0.627232304	0.606384699	0.776076921	0.525849772	0.726611119	0.635909542	0.350948376	0.776836672	0.412672137	0.782812051	0.58758246	0.563555409	0.154351492	0.239132523	0.176977689	0.480059669	0.790916826	0.206120473	0.562085673	0.792015426	0.778953736	0.777384626	0.649585265	0.639756102	0.244294878	0.102624202	0.498009748	0.329404287	0.416957262	0.33807352	0.087320254	0.52697481	0.178992301	0.093419717	0.703279906
487	0.620427563	0.759302886	0.679406218	0.623290198	0.639210453	0.716897388	0.675234254	0.783964756	0.617694407	0.758259455	0.736833938	0.605427938	0.727530578	0.754383057	0.676707081	0.550404769	0.783161114	0.46944228	0.677330531	0.685136358	0.298459867	0.739437253	0.357921666	0.783869678	0.531342782	0.606875505	0.127124536	0.19605046	0.144530605	0.424019345	0.764723933	0.168051524	0.505671905	0.768170844	0.742750335	0.740281842	0.697806106	0.584557675	0.200544678	0.090168345	0.441776852	0.27806961	0.362093276	0.286246197	0.089537132	0.470561386	0.146117314	0.083995549	0.651529334
488	0.663347277	0.770707056	0.718624862	0.666409484	0.646146648	0.667933531	0.715056502	0.765642363	0.646083239	0.770036591	0.759650713	0.645855638	0.754109581	0.768762657	0.716442894	0.494241805	0.768799834	0.413673924	0.624643481	0.723458143	0.24925455	0.693932298	0.305136591	0.76458982	0.475147018	0.647329383	0.107243133	0.159823035	0.119857714	0.369056084	0.726227784	0.137615239	0.449563607	0.731188616	0.697991666	0.694961817	0.733264742	0.528670498	0.163491927	0.081884495	0.386442155	0.230621912	0.309124208	0.23805393	0.091787011	0.414777471	0.121029415	0.077892288	0.597421829
489	0.697240802	0.761410896	0.741697281	0.700170873	0.643500893	0.615596506	0.739218992	0.73290411	0.665626569	0.761131044	0.761668849	0.678850811	0.760267352	0.762235918	0.74033503	0.438409174	0.738854135	0.35906089	0.570160085	0.744978603	0.204936797	0.643670621	0.25546543	0.731197223	0.419470694	0.680197543	0.093394517	0.131329108	0.102136689	0.315862631	0.680306335	0.114817048	0.39422459	0.686218598	0.648194202	0.644815053	0.750620473	0.472743068	0.134128729	0.076605261	0.332614488	0.18875578	0.259164655	0.195162889	0.094068037	0.360136282	0.10295942	0.074168167	0.542190111
490	0.717426058	0.735865915	0.746036043	0.719880107	0.63170297	0.561493628	0.744871935	0.691013013	0.674152582	0.735916775	0.745287787	0.700133063	0.747502141	0.738829489	0.745602825	0.383407562	0.69879466	0.306362071	0.514919046	0.747491794	0.167164527	0.59076312	0.210455934	0.68888592	0.364839516	0.701200065	0.084107053	0.110318619	0.089967053	0.265496664	0.630045998	0.098662874	0.340250183	0.636551115	0.595569895	0.59197751	0.748683286	0.41728933	0.112333417	0.073465813	0.281224131	0.153985679	0.213736027	0.159159494	0.096379944	0.307390444	0.090524252	0.072137719	0.486637378
491	0.721650033	0.699270359	0.73301715	0.723392746	0.611889276	0.50662558	0.733098025	0.643580003	0.671026269	0.699571232	0.715258573	0.707186135	0.72018506	0.703720331	0.733426771	0.329886801	0.652549109	0.256719627	0.459596733	0.732774909	0.137049299	0.536515616	0.171800097	0.64118551	0.311990771	0.707871111	0.078107629	0.095608137	0.081899119	0.219439085	0.577344597	0.087675489	0.288526445	0.584210787	0.541486415	0.53777036	0.730105976	0.362855375	0.096998641	0.071850794	0.233623923	0.127016285	0.174537925	0.130922703	0.098723757	0.257673598	0.082264363	0.071315678	0.431331785
492	0.710734581	0.655615161	0.706468083	0.711694681	0.585495634	0.451660647	0.707564487	0.592831887	0.657126542	0.656098806	0.676099543	0.700062996	0.682923095	0.661064962	0.707540962	0.278833005	0.602563499	0.211696239	0.404740189	0.704858191	0.114552857	0.481759918	0.140686311	0.590270022	0.262047108	0.700337996	0.074459911	0.085696258	0.076779214	0.179392377	0.523387514	0.08046896	0.240368748	0.530459266	0.486811829	0.483034365	0.69923928	0.310216594	0.086625407	0.071329165	0.19149609	0.107345155	0.14282194	0.110132774	0.101101524	0.212541897	0.077007712	0.071361278	0.376823618
493	0.687330043	0.60762055	0.670411323	0.687563985	0.553935875	0.397173552	0.672268207	0.540237565	0.634147201	0.60823737	0.631149321	0.680635228	0.639267963	0.613738759	0.671964702	0.231628061	0.550447766	0.172967053	0.350967983	0.667784753	0.098665636	0.427121223	0.117276442	0.537574736	0.21651799	0.680532126	0.072482689	0.0792591	0.07375226	0.146711165	0.468985138	0.075957319	0.197416223	0.476152579	0.4321877	0.42839867	0.660059995	0.260503167	0.079858847	0.071587746	0.156375354	0.093699856	0.118840224	0.095610698	0.103516042	0.173672802	0.073883355	0.072026324	0.323827253
494	0.654690382	0.55700961	0.628073257	0.654311429	0.518459577	0.34382171	0.630484164	0.4867448	0.604062954	0.557723931	0.582594861	0.651659205	0.591597009	0.563571584	0.629965619	0.189954925	0.49723292	0.141748121	0.299144843	0.624708471	0.08789182	0.37319527	0.100636297	0.484028008	0.177096718	0.65123836	0.071701422	0.075295919	0.072220635	0.121782659	0.414752324	0.073365772	0.161265887	0.42192158	0.37820634	0.374457985	0.61550515	0.215251157	0.075661304	0.072406405	0.129007557	0.084575195	0.101727307	0.085845049	0.105970803	0.142298401	0.072282135	0.073135826	0.273387689
495	0.615615363	0.504939665	0.581694065	0.614740668	0.480113755	0.292522892	0.584507509	0.433061378	0.568664554	0.505724989	0.531884686	0.615750969	0.541482979	0.51178651	0.58382455	0.15533074	0.443669104	0.118230326	0.25050802	0.577793928	0.080836538	0.32074428	0.08930259	0.430328526	0.145091985	0.615075609	0.071774372	0.073093111	0.071756475	0.103884796	0.361327236	0.072143299	0.132827992	0.368394986	0.325609503	0.321969222	0.567554386	0.176149903	0.073291151	0.073624796	0.109007599	0.078696587	0.090038712	0.079509695	0.108469883	0.118633115	0.071768168	0.074562162	0.226944978
496	0.57217378	0.452228253	0.532769634	0.570902734	0.439775571	0.244586783	0.535874593	0.379834982	0.529405146	0.453063692	0.480005135	0.574981851	0.489987256	0.459237633	0.535065808	0.128427597	0.390405922	0.101490407	0.20666522	0.528482799	0.076437486	0.270863116	0.081854074	0.37712516	0.120785356	0.574106117	0.07245986	0.072151694	0.072057833	0.091599729	0.309552435	0.071902479	0.111845227	0.316381066	0.275457829	0.272018535	0.517526229	0.144456643	0.072230184	0.075128981	0.095098201	0.075134076	0.082335225	0.075622344	0.111017961	0.101771162	0.072033908	0.076214757	0.186189809
497	0.525861666	0.399567652	0.482365538	0.524274527	0.398236759	0.20163669	0.485677859	0.327840776	0.487439302	0.400434763	0.427718958	0.530905967	0.437911529	0.406629194	0.484773298	0.108804995	0.338183995	0.090088802	0.169248668	0.477805047	0.073927259	0.225017666	0.077175513	0.325203405	0.103390951	0.529873474	0.073582776	0.072111353	0.072906128	0.083471237	0.260605354	0.072363079	0.097165603	0.267007817	0.229184336	0.226063635	0.466373391	0.12043454	0.07210437	0.076836533	0.085791776	0.073220623	0.077475659	0.073477042	0.113620294	0.090277784	0.072856736	0.078028309	0.152548662
498	0.477762375	0.347692897	0.431292699	0.475924301	0.356284949	0.165266454	0.434742739	0.278134275	0.443695488	0.348572274	0.375731059	0.484671271	0.385963369	0.354683073	0.43376737	0.095199295	0.287993967	0.082594989	0.139341666	0.426552935	0.072764538	0.184878418	0.074463786	0.275636272	0.091497982	0.483517082	0.075017784	0.072715106	0.074145031	0.078307642	0.216019413	0.073324946	0.08729655	0.221767008	0.188455455	0.185774393	0.414852438	0.103277519	0.072647012	0.078688881	0.079791903	0.072484808	0.07463489	0.072575359	0.116282779	0.082718212	0.074077448	0.079956667	0.126593777
499	0.428721181	0.297552073	0.380286151	0.426688384	0.31479408	0.136444126	0.383806608	0.232132318	0.398982766	0.298420106	0.324864848	0.437169432	0.334933334	0.304311445	0.38278394	0.08611269	0.24118129	0.077880839	0.11697673	0.375459611	0.072565796	0.151840483	0.07315704	0.229858314	0.083649643	0.435923446	0.076675045	0.073778983	0.075662404	0.075249955	0.17745389	0.074644605	0.08089511	0.182326053	0.154719176	0.15255981	0.36370153	0.091560022	0.073667227	0.080644633	0.076138956	0.072591295	0.073235835	0.07256326	0.119012018	0.077957375	0.075581846	0.08196747	0.107781393
500	0.379509238	0.250423997	0.330172628	0.377335955	0.274793827	0.115056357	0.333686327	0.191489388	0.354109737	0.251250926	0.276212602	0.389189007	0.285852088	0.256745025	0.33264223	0.080266365	0.199375139	0.075143721	0.101167507	0.325366705	0.073055845	0.126422563	0.072855386	0.189527593	0.078682997	0.387879789	0.0784903	0.075170837	0.077377795	0.073696157	0.14615731	0.07621897	0.076956412	0.1500255	0.12859674	0.126964692	0.313806743	0.083835176	0.075027912	0.082674806	0.074159585	0.073299386	0.072868192	0.073186641	0.121815411	0.075186945	0.077287983	0.084038287	0.09479232
501	0.330973963	0.207893621	0.282016983	0.32872025	0.237477228	0.100020916	0.285426302	0.157670928	0.309997002	0.208645215	0.231203301	0.341557512	0.240081688	0.213535707	0.284392546	0.076722553	0.164125847	0.073819841	0.090446109	0.277368049	0.074037607	0.108033614	0.073271901	0.156083373	0.075766143	0.340216474	0.080418134	0.07679617	0.079234045	0.073218319	0.122407365	0.077974493	0.07477348	0.125294444	0.109595848	0.108422574	0.266336084	0.078955105	0.076631015	0.084759518	0.073377539	0.074436821	0.073237592	0.074263604	0.124701292	0.073839236	0.079137617	0.086153957	0.086144032
502	0.284184692	0.171540636	0.237209484	0.281923943	0.204087106	0.089865707	0.24039361	0.131316156	0.267769774	0.172186226	0.191467785	0.295282666	0.199235667	0.176291637	0.2394093	0.074829063	0.136275768	0.073510379	0.083436469	0.232885164	0.075371364	0.095336119	0.07420287	0.130110547	0.074320059	0.293948142	0.082427091	0.078588243	0.08119126	0.073511953	0.10538671	0.079859489	0.073851196	0.10744085	0.096421966	0.095606225	0.222780421	0.076108811	0.078407241	0.086885578	0.073454361	0.075881464	0.074134989	0.075665184	0.127679123	0.073512781	0.081090076	0.088304654	0.080616135
503	0.24047961	0.142387485	0.197329605	0.238300893	0.175661992	0.083264823	0.20015934	0.112026329	0.228738546	0.142910549	0.15839204	0.251617911	0.16478692	0.146142555	0.199267028	0.074110929	0.115639239	0.073922351	0.079073939	0.193505971	0.076954805	0.086904155	0.075499242	0.111157886	0.073921283	0.250336832	0.084494878	0.080498613	0.083220908	0.074353911	0.093742908	0.081836691	0.07382615	0.095158904	0.087642908	0.087087799	0.184728472	0.074710358	0.080306255	0.089044153	0.074141741	0.077543906	0.075407432	0.077296955	0.13075962	0.073912636	0.083116251	0.090484019	0.077306381
504	0.20138135	0.120483306	0.163798195	0.199381519	0.152760015	0.079191566	0.166170366	0.098614339	0.19425671	0.12088715	0.132604697	0.212022608	0.137555051	0.123285961	0.165405805	0.074230597	0.101152891	0.074847795	0.076592671	0.160610667	0.078715452	0.081530313	0.077055271	0.098011049	0.074268684	0.210847326	0.086606514	0.082493533	0.085303541	0.075585973	0.086072031	0.083880384	0.07444001	0.08702652	0.082022219	0.081652487	0.153436391	0.074344661	0.082292945	0.091229874	0.075263578	0.079360919	0.076946411	0.079092087	0.133955047	0.074829443	0.08519628	0.092688444	0.075576007
505	0.168277269	0.104929519	0.137362108	0.166539084	0.13529724	0.076916777	0.139237718	0.089651068	0.16540692	0.105232831	0.113712263	0.177916042	0.117355025	0.10693641	0.138617579	0.074947273	0.09139638	0.076138864	0.075454074	0.134854677	0.080602109	0.078329034	0.078795821	0.089242091	0.075147681	0.176893759	0.0887522	0.084549745	0.087426164	0.077095624	0.081237957	0.08597308	0.075508945	0.081864316	0.078645356	0.078407478	0.12932703	0.074715418	0.084343074	0.093439814	0.076694665	0.081287983	0.078674813	0.081003461	0.137279544	0.076114358	0.087316872	0.09491627	0.074973481
506	0.141948618	0.094357586	0.117785307	0.140514368	0.12263994	0.075926075	0.119200211	0.083893838	0.14265219	0.094584191	0.100556622	0.150251991	0.103150702	0.095760237	0.118717568	0.076089167	0.085071922	0.077690103	0.075274042	0.115900669	0.082578831	0.076676772	0.080667604	0.08362353	0.076405265	0.149410204	0.090925805	0.086651468	0.089580355	0.078802633	0.078420871	0.088103138	0.076901891	0.078813451	0.076867764	0.076724001	0.111833706	0.075610822	0.086440153	0.095672777	0.07834569	0.083293987	0.080537915	0.082998083	0.140749516	0.077661217	0.089469395	0.097167223	0.075175529
507	0.122254631	0.087443008	0.10402426	0.12111564	0.11387852	0.075852737	0.105062061	0.080421658	0.125690067	0.087613969	0.091755492	0.129150161	0.09356988	0.088408338	0.104693826	0.077534026	0.08119581	0.079426487	0.075777822	0.102644437	0.084620739	0.076131998	0.082633225	0.080250117	0.077932518	0.128488278	0.093123829	0.088788293	0.091760975	0.080650126	0.077045125	0.090263115	0.078525528	0.07727087	0.076233638	0.076156974	0.099735498	0.076880148	0.088573272	0.097928824	0.080153225	0.085357529	0.082497286	0.085053198	0.144384176	0.079394483	0.091648558	0.099442043	0.075951234
508	0.108291433	0.083143933	0.094751819	0.107402449	0.108103036	0.076431435	0.095505612	0.078577071	0.113666176	0.083275182	0.086108011	0.113928051	0.087362217	0.083797316	0.095224364	0.079193836	0.079062972	0.081294282	0.076767321	0.093749994	0.086710672	0.076375153	0.084666426	0.078476032	0.079651057	0.113422553	0.095344592	0.090953539	0.093965154	0.08259763	0.076696384	0.092448474	0.080312792	0.076803203	0.07641318	0.076384286	0.091697531	0.078414901	0.090735384	0.100208903	0.082072011	0.087463969	0.084525912	0.087153185	0.148206114	0.081260053	0.093851379	0.101742197	0.077134372
509	0.098815953	0.080714321	0.088764132	0.098120454	0.104546513	0.077474845	0.089312187	0.077896819	0.105517603	0.080817282	0.08271745	0.103443255	0.083572227	0.0811454	0.089094248	0.081006732	0.078177371	0.083256142	0.078102969	0.088035447	0.088837346	0.07718001	0.086749469	0.077845999	0.081505893	0.103061259	0.097587805	0.093143351	0.096191747	0.084617282	0.077080502	0.094656882	0.08221679	0.077102774	0.077172809	0.077177879	0.086598757	0.080138653	0.092922375	0.102514668	0.084070765	0.08960381	0.08660552	0.089287853	0.152242328	0.083220312	0.096076637	0.104069748	0.078607819
510	0.092663609	0.079615599	0.085128087	0.092110333	0.102609175	0.078847926	0.08552916	0.07804415	0.100266761	0.079698403	0.080933529	0.096533451	0.081503507	0.07988817	0.085356523	0.082928513	0.078178606	0.085285779	0.079684131	0.084594423	0.090993407	0.078383358	0.088870316	0.07802905	0.083457854	0.096243386	0.099854123	0.09535576	0.098440774	0.086689696	0.077984609	0.096887481	0.08420427	0.077946769	0.078343963	0.078373209	0.083596931	0.081996558	0.095132087	0.104848288	0.086127611	0.091770994	0.088723682	0.091450639	0.156525108	0.085248779	0.098324292	0.106427208	0.080287141
511	0.088909594	0.079470324	0.083175601	0.088458923	0.101849341	0.08045693	0.083471804	0.078783283	0.097131487	0.079538813	0.080300953	0.092226878	0.08066818	0.079630231	0.0833315	0.08492915	0.078814122	0.087365745	0.081441064	0.082781049	0.093174627	0.079871822	0.091021478	0.078793515	0.085480448	0.092003557	0.102144985	0.097590309	0.100713199	0.088802249	0.079260611	0.099140605	0.086252899	0.079180103	0.07980955	0.079855974	0.082096737	0.083951082	0.09736393	0.107212394	0.088228189	0.093962194	0.090872637	0.093637866	0.161093935	0.087327871	0.100595267	0.108817505	0.082113961
512	0.086868471	0.079998961	0.082419548	0.086491251	0.101933901	0.082232065	0.082641076	0.079939721	0.095518913	0.080057273	0.080483566	0.08978787	0.080706752	0.080078889	0.082523806	0.086986695	0.079896967	0.089483552	0.083321929	0.082124034	0.095378493	0.081561069	0.093197971	0.079967939	0.087554391	0.089612464	0.104462286	0.099847377	0.103010532	0.090946089	0.080798628	0.101417255	0.088346518	0.080687766	0.081482485	0.081541158	0.081662578	0.085974632	0.099618179	0.109609938	0.090362337	0.096175587	0.093047197	0.095847441	0.165996755	0.089444996	0.102891037	0.111243878	0.084044984
513	0.086040044	0.081001286	0.082507248	0.085715258	0.102620717	0.084124376	0.082675577	0.081389434	0.094990873	0.08105233	0.081239551	0.088674652	0.081360219	0.081024273	0.082574728	0.089086463	0.081294171	0.091631233	0.085290667	0.082282286	0.097604102	0.083391679	0.095397138	0.081430479	0.089666888	0.088533484	0.106808394	0.102128151	0.105334826	0.09311582	0.082520903	0.103719088	0.090474555	0.082388327	0.083301378	0.083368848	0.081979518	0.088048504	0.101895945	0.112044228	0.092523733	0.098410758	0.095244561	0.098078763	0.171292798	0.091592114	0.105213628	0.113709921	0.086050283
514	0.086075812	0.082340516	0.083195297	0.085788398	0.103741956	0.086101134	0.083325764	0.083048048	0.095238961	0.082386359	0.082403239	0.088507111	0.08245091	0.082322915	0.08323661	0.091219312	0.082915235	0.093804241	0.08732345	0.083020548	0.09985177	0.085323694	0.097618077	0.083098262	0.091810093	0.088390362	0.109186087	0.104434457	0.107688591	0.095308659	0.084374831	0.106048294	0.092630681	0.084226649	0.08522491	0.085298749	0.082830685	0.090160801	0.104198995	0.114518938	0.094708959	0.10066837	0.097463726	0.100332357	0.177057112	0.09376463	0.107565527	0.1162196	0.088110253
515	0.086726907	0.083920037	0.084310742	0.086466122	0.10517831	0.088139802	0.08441426	0.084856141	0.096042082	0.083962149	0.08385746	0.089013196	0.083853089	0.083873451	0.084333438	0.093379529	0.084696385	0.096000141	0.0894041	0.08417174	0.102122582	0.087329403	0.099860974	0.084912932	0.093979214	0.088913859	0.11159847	0.106768557	0.11007468	0.097523431	0.086323651	0.108407443	0.09481119	0.086164161	0.0872244	0.087302907	0.084062236	0.092303847	0.106529542	0.117038082	0.096916384	0.102949767	0.099704804	0.102609466	0.183385258	0.095960072	0.109949569	0.118777251	0.090211725
516	0.087816123	0.08567148	0.085730755	0.087574313	0.10684517	0.090225003	0.085815066	0.086771858	0.097242669	0.085710911	0.085519231	0.089999104	0.085477668	0.085604137	0.085740187	0.09556379	0.086592655	0.09821797	0.091521795	0.085617235	0.104418183	0.089389719	0.102126788	0.0868334	0.096171593	0.089912186	0.114048957	0.109133066	0.112496259	0.099760092	0.088341769	0.110799427	0.097014199	0.088173971	0.089280062	0.089362061	0.085565022	0.09447291	0.108890158	0.119606038	0.099145633	0.1052568	0.101968702	0.104911861	0.190399848	0.098177453	0.112368898	0.121387607	0.092346036
517	0.089213403	0.087544714	0.087365174	0.088985162	0.10868062	0.092345976	0.087435691	0.08876472	0.098725372	0.087582207	0.087327663	0.09132277	0.087259274	0.087462351	0.087365076	0.097770304	0.088571249	0.100457715	0.09366916	0.08726996	0.106740607	0.09149112	0.104416995	0.088829755	0.098385934	0.091244746	0.116541231	0.111530872	0.114956756	0.102019329	0.090410824	0.113227404	0.099239002	0.090236747	0.091377854	0.09146256	0.087258936	0.09666515	0.111283692	0.122227536	0.101397138	0.107591675	0.104256852	0.107241681	0.198255041	0.10041674	0.114826922	0.124055791	0.094507413
518	0.090838851	0.089509119	0.089158606	0.090620153	0.110646866	0.09449692	0.089219316	0.090816504	0.100419668	0.089545221	0.089245416	0.092896986	0.089157784	0.089415912	0.089151719	0.099998943	0.090612481	0.102720411	0.095842525	0.089076413	0.109092367	0.093626074	0.106733672	0.090884135	0.100622432	0.092825235	0.119079415	0.113965256	0.117460011	0.104302658	0.092520243	0.115694928	0.101486174	0.092341306	0.093509918	0.09359679	0.089094763	0.098879763	0.113713385	0.1249079	0.103672237	0.109957049	0.106571298	0.109601524	0.207170859	0.102678956	0.117327459	0.126787595	0.096693197
519	0.092627487	0.091540246	0.091066218	0.09241545	0.112713416	0.096673612	0.091119935	0.092912903	0.10226813	0.091575349	0.091242513	0.094650637	0.091140926	0.09143909	0.091054468	0.10225014	0.092700849	0.105007472	0.098039406	0.090993316	0.111476209	0.095788947	0.109079155	0.092982525	0.102881788	0.094583295	0.121667948	0.116439745	0.120010152	0.106611906	0.094661922	0.118205814	0.103756737	0.09447905	0.095670354	0.095759052	0.091032745	0.101116623	0.116182723	0.127652921	0.105972608	0.112355809	0.108914349	0.111994223	0.217440826	0.104965504	0.119874616	0.129589343	0.098901732
520	0.094532523	0.093620988	0.093055982	0.094325101	0.114858629	0.098873684	0.093104662	0.095044186	0.104229432	0.093655367	0.093297811	0.096532443	0.093185878	0.09351384	0.093040693	0.104524984	0.094825755	0.10732076	0.100258712	0.092989778	0.113895165	0.097976339	0.11145609	0.095115406	0.105165299	0.096468205	0.124311662	0.118958168	0.122611667	0.108949278	0.096830651	0.120764207	0.10605224	0.096644408	0.097855567	0.097945895	0.093044575	0.103376392	0.11869549	0.130468971	0.108300324	0.114791125	0.111288622	0.114422892	0.229469502	0.107278235	0.122472851	0.132468019	0.101132539
521	0.096523793	0.095740806	0.095107478	0.096319491	0.117068883	0.10109643	0.095152507	0.097204718	0.106277019	0.09577466	0.095398095	0.098509296	0.095278315	0.095629003	0.09508958	0.106825172	0.09698099	0.109662562	0.102500609	0.095046134	0.116352576	0.100186848	0.113867445	0.097277287	0.107474817	0.09844722	0.127015878	0.121524713	0.12526948	0.111317348	0.09902382	0.123374642	0.108374725	0.098834528	0.100064025	0.100155888	0.095112299	0.105660458	0.121255825	0.133363158	0.110657851	0.117266477	0.113697064	0.116890956	0.243837667	0.109619431	0.125127062	0.135431454	0.103386204
522	0.098580252	0.097892789	0.097206671	0.098377969	0.119334995	0.103342083	0.097249028	0.099391137	0.108392412	0.097926263	0.097534524	0.100558029	0.097408594	0.097777222	0.097186807	0.109152784	0.09916277	0.11203547	0.104765976	0.097148892	0.118852076	0.102420192	0.116316465	0.099464907	0.109812552	0.10049744	0.129786446	0.12414394	0.127988988	0.113718968	0.101240257	0.126042075	0.110726565	0.101048061	0.102295348	0.102388722	0.097223656	0.107970646	0.123868234	0.136343404	0.113047941	0.119785649	0.116142891	0.119402137	0.261391395	0.111991678	0.127842609	0.138488416	0.105663925
523	0.10068765	0.100072741	0.099344295	0.100486567	0.121651122	0.105611588	0.099384667	0.101601779	0.110563156	0.100105938	0.099701525	0.102662888	0.099570572	0.099953979	0.099322906	0.111510227	0.101369133	0.114442354	0.107056252	0.09928917	0.121397608	0.10467694	0.118806674	0.101676677	0.112181023	0.102603296	0.132629827	0.12682083	0.130776129	0.116157268	0.103479882	0.128771937	0.113110428	0.1032848	0.104550034	0.104644949	0.099370642	0.11030915	0.126537634	0.139418595	0.115473622	0.122352749	0.118629604	0.121960479	0.283394214	0.114397839	0.130625392	0.141648786	0.10796739
524	0.102836622	0.102278415	0.101514507	0.102636119	0.124013856	0.107906436	0.101553377	0.103836213	0.112781128	0.102311412	0.101895874	0.104813437	0.101760618	0.102156801	0.10149189	0.113900198	0.10359943	0.116886357	0.10937331	0.101461401	0.123993462	0.106958292	0.121341903	0.103912217	0.114583034	0.104754484	0.135553204	0.129560849	0.133637475	0.118635652	0.105743414	0.131570211	0.115529257	0.105545368	0.106829228	0.106925755	0.101548307	0.112678472	0.129269422	0.142598763	0.117938194	0.12497225	0.121161005	0.12457038	0.311787357	0.116841051	0.133481938	0.144923782	0.110298672
525	0.105021184	0.104508932	0.103713844	0.104820783	0.126421524	0.110228527	0.103751544	0.106094876	0.115041223	0.104541783	0.104115983	0.107002928	0.103976855	0.104384644	0.103690193	0.116325657	0.10585394	0.119370891	0.111719367	0.103662314	0.126644311	0.109265919	0.123926309	0.106172005	0.117021651	0.106944352	0.138564584	0.132370015	0.136580322	0.121157813	0.108032149	0.134443512	0.117986257	0.107830992	0.109134561	0.109232802	0.103753826	0.115081387	0.132069533	0.145895278	0.120445238	0.127649035	0.12374122	0.127236637	0.349593827	0.119324721	0.136419489	0.148326187	0.112660157
526	0.107237799	0.106764407	0.105940561	0.107037122	0.128873753	0.112580097	0.105977321	0.108378859	0.117340535	0.106797152	0.106361459	0.109227278	0.106218678	0.106637505	0.105915998	0.11878983	0.108133635	0.121899657	0.114096934	0.105890307	0.129355265	0.111601868	0.126564419	0.10845716	0.119500206	0.109168882	0.141672954	0.135254984	0.139612822	0.123727756	0.110347835	0.137399194	0.120484909	0.110143362	0.111468045	0.111568128	0.105985914	0.117520932	0.134944527	0.14932112	0.122998637	0.130388451	0.12637474	0.129964504	0.40154993	0.121852543	0.139446137	0.151870679	0.115054513
527	0.10948466	0.109045683	0.108194144	0.109283404	0.131371143	0.11496367	0.108230116	0.110689738	0.119677731	0.109078349	0.108632764	0.111484291	0.108486398	0.108916137	0.108168737	0.121296214	0.11044	0.124476671	0.116508787	0.108144967	0.132131935	0.113968497	0.129261172	0.110769281	0.122022312	0.111425928	0.144888459	0.138223162	0.142744132	0.126349837	0.112692578	0.140445475	0.123028987	0.112484535	0.113832006	0.113934082	0.108244385	0.120000409	0.137901699	0.15289121	0.125602611	0.133196383	0.129066466	0.132759752	0.474794699	0.124428526	0.142570964	0.155574231	0.117484665
528	0.11176119	0.111354137	0.110474954	0.111559102	0.133915036	0.11738203	0.110510235	0.113029471	0.122052619	0.111386743	0.110930989	0.113773112	0.110780988	0.111221851	0.110448732	0.123848597	0.112774916	0.127106293	0.118957957	0.110426727	0.1349805	0.116368432	0.13202198	0.113110344	0.124591884	0.113714668	0.148222594	0.141282812	0.145984576	0.129028799	0.115068774	0.143591574	0.125622579	0.114856871	0.116229042	0.116333283	0.110529847	0.122523392	0.140949182	0.156622773	0.128261747	0.136079326	0.131821763	0.135628751	0.578225964	0.127057021	0.145804209	0.159456565	0.119953794
529	0.114067722	0.113691566	0.112784011	0.113864587	0.136507379	0.119838211	0.112818655	0.115400328	0.124465867	0.113724124	0.113257707	0.116093877	0.113103932	0.113556389	0.112756976	0.126451085	0.115140593	0.129793273	0.121447731	0.112736666	0.137907803	0.118804555	0.134852797	0.115482635	0.127213167	0.116035263	0.151688476	0.144443217	0.149345878	0.131769828	0.117479089	0.146847902	0.128270132	0.117262996	0.118662009	0.118768606	0.112843501	0.12509375	0.144096106	0.160535862	0.130981055	0.139044492	0.134646533	0.138578562	0.715416233	0.129742769	0.149157492	0.163540794	0.122465348
530	0.116405257	0.116060104	0.115122833	0.116200889	0.139150617	0.122335504	0.115156864	0.117804854	0.126918796	0.116092619	0.115614867	0.118447452	0.115457109	0.115921842	0.115094962	0.129108142	0.117539517	0.132542804	0.123981667	0.115076343	0.140921456	0.121279996	0.1377602	0.117888712	0.129890785	0.118388598	0.155301162	0.147714856	0.152841418	0.134578618	0.119926439	0.150226273	0.13097649	0.119705788	0.121134009	0.121243176	0.115187006	0.127715683	0.147352767	0.164653979	0.133766025	0.142099922	0.137547292	0.141617052	0.863324194	0.132490954	0.152644071	0.167854203	0.125023054
531	0.11877531	0.118462173	0.117493327	0.118569542	0.141847639	0.124877471	0.117526743	0.120245846	0.129413248	0.118494646	0.118004732	0.120835262	0.117842721	0.118320592	0.117464583	0.131824633	0.119974433	0.135360588	0.126563617	0.117447699	0.144029969	0.123798147	0.140751493	0.120331389	0.132629784	0.120776108	0.159078051	0.151109622	0.156486568	0.137461446	0.122413989	0.15374018	0.133746959	0.122188377	0.123648406	0.123760377	0.117562384	0.130393758	0.150730846	0.169004887	0.136622701	0.145254631	0.140531273	0.144753032	0.963991347	0.135307264	0.156279172	0.172429275	0.127630955
532	0.121179804	0.120900454	0.119897726	0.120972482	0.144601737	0.127467963	0.119930504	0.122726352	0.131951492	0.120932881	0.12042984	0.123259168	0.120263251	0.120755286	0.119868054	0.134605884	0.122448331	0.138252911	0.129197757	0.119852995	0.147242905	0.126362678	0.143834822	0.122813723	0.135435697	0.123199668	0.16303937	0.154641099	0.160299098	0.140425265	0.124945166	0.157405119	0.136587362	0.124714149	0.126208837	0.126323869	0.11997196	0.133132959	0.154243666	0.173621643	0.139557763	0.148518775	0.143606541	0.147996417	0.984831629	0.138197972	0.160080383	0.177304999	0.13029344
533	0.123620997	0.12337788	0.122338543	0.123411978	0.147416595	0.130111159	0.122370643	0.125249669	0.134536171	0.12341025	0.122892982	0.125721397	0.122721442	0.12322882	0.122307877	0.137457743	0.124964456	0.14122673	0.131888626	0.122294769	0.150571062	0.12897756	0.147019316	0.125339029	0.138314611	0.12566151	0.167208801	0.158324877	0.164299673	0.143477805	0.127523676	0.161238997	0.139504126	0.127286765	0.128819237	0.128937616	0.122418332	0.135938741	0.157906509	0.178543924	0.142578629	0.151903856	0.146782126	0.151358424	0.95401918	0.141170019	0.164068152	0.182528592	0.133015287
534	0.126101445	0.125897629	0.124818555	0.125890595	0.150296291	0.132811598	0.124849919	0.127819366	0.137170272	0.125929929	0.1253972	0.128224495	0.125220285	0.125744338	0.124786815	0.140386662	0.127526315	0.144289784	0.134641174	0.124775818	0.154026703	0.131647101	0.150315262	0.127910889	0.141273254	0.128164184	0.171614286	0.162178979	0.168512513	0.146627711	0.130153531	0.165262649	0.142504373	0.129910193	0.131483877	0.131605915	0.124904354	0.138817106	0.161737022	0.183819821	0.145693572	0.155422976	0.150068202	0.154851813	0.903513708	0.144231125	0.168266431	0.188157822	0.135801719
535	0.128623982	0.128463148	0.127340791	0.128411171	0.153245317	0.135574232	0.127371348	0.130439305	0.139857109	0.128495359	0.127945791	0.130771298	0.127763026	0.128305249	0.127307888	0.143399794	0.130137704	0.147450724	0.137460818	0.127299195	0.157623835	0.13437599	0.153734312	0.130533183	0.144319097	0.130710534	0.176289054	0.166224375	0.172966211	0.149884696	0.132839087	0.16950049	0.145596031	0.132588732	0.134207402	0.134333446	0.127433135	0.141774681	0.165755717	0.189508197	0.148911871	0.159091146	0.153476286	0.158491188	0.845249849	0.147389919	0.172703481	0.194264126	0.138658469
536	0.131191713	0.131078164	0.129908544	0.130976815	0.156268599	0.13840448	0.129938207	0.133113672	0.142600331	0.131110261	0.130542326	0.133364929	0.130353183	0.13091524	0.129874377	0.1465051	0.132802737	0.150719269	0.140353516	0.129868214	0.161378557	0.13716935	0.157289742	0.133210115	0.147460477	0.133303685	0.181272968	0.17048564	0.177694806	0.153259731	0.135585085	0.173981353	0.148787972	0.135327064	0.136994882	0.137125315	0.130008044	0.14481882	0.169986606	0.195681902	0.152243985	0.162925676	0.157019493	0.162293366	0.784690049	0.150656094	0.177412923	0.200936892	0.141591855
537	0.133808016	0.133746712	0.132525383	0.133590909	0.159371543	0.141308297	0.132554046	0.135847018	0.145403931	0.133778667	0.133190671	0.136008798	0.132994561	0.133578302	0.132489835	0.149711488	0.135525881	0.154106391	0.14332584	0.132486465	0.165309479	0.140032791	0.160996761	0.135946258	0.150706739	0.135947051	0.186614268	0.174991774	0.182739143	0.156765272	0.138396705	0.178739541	0.152090169	0.1381303	0.139851871	0.139987122	0.132632731	0.147957718	0.174457993	0.202432077	0.155701762	0.166946648	0.160712836	0.16627783	0.724202535	0.154040591	0.182435078	0.208289296	0.144608865
538	0.13647656	0.136473175	0.135195169	0.136257125	0.162560074	0.144292249	0.135222711	0.138644301	0.148272267	0.13650495	0.135895013	0.138706614	0.135691283	0.136298767	0.135158113	0.153028961	0.138312001	0.157624533	0.14638507	0.135157836	0.16943824	0.142972486	0.164872879	0.138746594	0.154068403	0.138644343	0.192371821	0.179777246	0.188148629	0.160415529	0.141279622	0.18381617	0.155513883	0.141004035	0.142784474	0.142925019	0.135311149	0.151200543	0.179203475	0.209874009	0.159298687	0.171177495	0.164573594	0.17046728	0.664708187	0.157555819	0.187818686	0.216466331	0.147717265
539	0.13920133	0.139262322	0.137922093	0.138979448	0.165840703	0.147363613	0.137948375	0.141510947	0.1512101	0.139293874	0.138659908	0.14146241	0.138447831	0.139081348	0.137883388	0.156468826	0.141166418	0.1612879	0.149539312	0.137886543	0.173790198	0.145995253	0.168938413	0.141616576	0.157557384	0.141399598	0.198618315	0.184883405	0.19398368	0.164226824	0.144240082	0.18926103	0.159071908	0.143954425	0.145799434	0.145945808	0.138047589	0.154557618	0.184263305	0.218155664	0.16305021	0.175645787	0.1686218	0.174888387	0.606587006	0.161215938	0.193623302	0.225656683	0.150925727
540	0.141986652	0.142119362	0.140710714	0.141762207	0.169220598	0.150530489	0.140735573	0.144452915	0.154222632	0.142150639	0.141490319	0.144280575	0.141269086	0.141931191	0.140670199	0.160043922	0.144094967	0.165112798	0.152797634	0.140677174	0.178395291	0.149108663	0.173217084	0.144562194	0.161187249	0.144217206	0.205444488	0.190360303	0.200318945	0.168218018	0.147284991	0.195134988	0.162778861	0.146988271	0.148904232	0.149057035	0.140846716	0.158040613	0.189686138	0.227469649	0.166974139	0.18038421	0.172880831	0.179572713	0.54993509	0.165037204	0.199922454	0.23610964	0.154243982
541	0.144837237	0.145050002	0.143565995	0.144610114	0.172707662	0.153801929	0.143589246	0.147476773	0.157315557	0.145080944	0.144391676	0.147165886	0.144160384	0.144853932	0.143523493	0.163768911	0.147104076	0.169118051	0.156170227	0.143534727	0.183289116	0.15232115	0.177736778	0.147590052	0.164973526	0.14710195	0.212964905	0.196269071	0.207247625	0.172411037	0.150422012	0.20151318	0.166651531	0.150113113	0.152107196	0.152267107	0.143713623	0.161662799	0.195531309	0.2380703	0.171091119	0.1854318	0.177378143	0.184557888	0.494703411	0.169038379	0.206807865	0.248159638	0.157682998
542	0.147758223	0.14806052	0.146493366	0.147528309	0.176310638	0.157188099	0.146514796	0.15058979	0.160495118	0.148091052	0.147369934	0.150123559	0.147127571	0.147855762	0.146448677	0.167660619	0.150200852	0.173325524	0.15966859	0.146464669	0.188514333	0.155642151	0.182530502	0.150707462	0.168934088	0.150059048	0.221325958	0.202685096	0.214887403	0.176831529	0.153659682	0.208489332	0.170709309	0.153337347	0.155417644	0.155585432	0.146653878	0.165439333	0.201871866	0.250298549	0.175425232	0.190835565	0.182146215	0.189889141	0.440797988	0.173241249	0.214395247	0.262262473	0.161255199
543	0.150755232	0.151157845	0.149498779	0.150522417	0.18003922	0.160700472	0.149518145	0.153800046	0.163768183	0.151187884	0.150431654	0.153159302	0.150177086	0.150943516	0.14945168	0.17173849	0.153393185	0.177760794	0.163305781	0.149472998	0.194122559	0.159082288	0.18763767	0.15392255	0.173089645	0.153094213	0.230717456	0.209702445	0.22338891	0.181509741	0.157007563	0.216181841	0.174974755	0.15667037	0.158846053	0.159022594	0.149673599	0.169387648	0.208798804	0.264619487	0.180004788	0.19665267	0.187223798	0.195621364	0.388184879	0.177671302	0.222832563	0.279050623	0.164974737
544	0.153834436	0.154349662	0.15258879	0.153598611	0.183904197	0.164352064	0.152605811	0.157116561	0.167142327	0.154379106	0.153584092	0.156279381	0.153316041	0.154124765	0.152539031	0.176025125	0.156689875	0.182453993	0.167096698	0.152566319	0.20017682	0.162653563	0.19310573	0.157244396	0.177464345	0.156213715	0.241388994	0.217439837	0.232947522	0.186481596	0.160476413	0.224742127	0.179474278	0.160122742	0.162404255	0.162590553	0.15277953	0.173527901	0.216426742	0.281677982	0.1848633	0.202953297	0.1926575	0.2018218	0.337021398	0.182358554	0.232311528	0.299415772	0.168857824
545	0.157002628	0.157644521	0.15577064	0.15676369	0.187917606	0.168157712	0.155784995	0.160549448	0.170625927	0.157673253	0.1568353	0.159490694	0.156552322	0.157407931	0.155717936	0.180546967	0.160100777	0.187440866	0.171058432	0.155751932	0.206754801	0.16636961	0.198992292	0.160683177	0.182086524	0.159424457	0.253673543	0.226048886	0.243820124	0.191790091	0.164078388	0.234366321	0.184239008	0.163706391	0.166105682	0.166302891	0.155979128	0.177883546	0.224901765	0.302381462	0.19004074	0.209824464	0.198503859	0.208573633	0.28780825	0.187338607	0.243083935	0.324630953	0.172923128
546	0.160267314	0.161051979	0.159052356	0.160025164	0.192092924	0.172134419	0.159063674	0.164110097	0.174228279	0.161079858	0.160194253	0.162800861	0.15989471	0.160802418	0.158996388	0.185335156	0.163636975	0.192764147	0.175210699	0.159037933	0.213953263	0.170245994	0.205367955	0.164250361	0.186989676	0.162734067	0.26802202	0.235725715	0.2563494	0.197487115	0.167827294	0.245311967	0.189305906	0.167434847	0.169965658	0.17017511	0.159280674	0.182482048	0.234412435	0.328022078	0.195585169	0.217375237	0.204832095	0.21598086	0.241520362	0.192654019	0.255485282	0.356524815	0.177192273
547	0.163636819	0.164582765	0.162442879	0.163391365	0.196445294	0.176301789	0.162450732	0.167811399	0.177959734	0.164609628	0.163670998	0.166218329	0.163353024	0.164318777	0.162383282	0.190426658	0.167311	0.198475377	0.179576388	0.162433343	0.221894138	0.174300588	0.212320156	0.167958931	0.192213697	0.166150999	0.28505477	0.246727662	0.270999684	0.203635888	0.171738896	0.257922385	0.19471922	0.17132355	0.174001765	0.174225011	0.162693406	0.187355803	0.245205602	0.360450476	0.201554905	0.225743983	0.211727842	0.224175072	0.199600542	0.198356104	0.269969631	0.397703689	0.181690477
548	0.167120409	0.168248981	0.165952202	0.166871568	0.200991791	0.180682559	0.165956096	0.171668015	0.18183186	0.168274633	0.167276831	0.169752495	0.166938294	0.167968898	0.165888561	0.195865681	0.171137087	0.204637257	0.184182243	0.165948251	0.230732892	0.178554028	0.219958327	0.171823659	0.197806488	0.169684661	0.305636954	0.259397138	0.288409307	0.21031415	0.175831292	0.272661901	0.200532355	0.175390204	0.17823429	0.17847314	0.166227665	0.192543307	0.257608939	0.402286602	0.208021356	0.235108385	0.219298157	0.233324772	0.163638304	0.204507274	0.287160465	0.451720621	0.186447338
549	0.170728436	0.172064337	0.169591545	0.170476138	0.205751736	0.185303259	0.169590904	0.175696709	0.185857629	0.172088549	0.171024506	0.173413854	0.170662958	0.171766243	0.169523384	0.201705539	0.175131483	0.211326783	0.189059716	0.169593988	0.240670234	0.183030289	0.228420988	0.175861438	0.203826056	0.173345559	0.330987904	0.274196322	0.309467414	0.217618478	0.180125377	0.290167512	0.206810345	0.17965523	0.182686778	0.182943363	0.169895079	0.198090653	0.272063658	0.457058386	0.215072829	0.245699588	0.227678391	0.243648507	0.134727756	0.211184155	0.307925356	0.522782129	0.191497841
550	0.174472518	0.176044446	0.173373556	0.174216708	0.210747076	0.190195053	0.173367711	0.179916746	0.190051642	0.176066943	0.174928498	0.177214171	0.174541116	0.175726126	0.173300332	0.208011081	0.17931284	0.218639457	0.194246061	0.173383337	0.251968692	0.187757396	0.237885585	0.180091692	0.210343268	0.177145473	0.362831041	0.291757724	0.335424078	0.225670139	0.184645417	0.311324143	0.213633127	0.184142318	0.18738673	0.18766357	0.173708784	0.204053496	0.289172155	0.528826792	0.222819667	0.25782233	0.237041708	0.255433512	0.112927973	0.218481762	0.333483214	0.613749078	0.196883642
551	0.17836574	0.180207174	0.177312563	0.178106385	0.21600283	0.195394805	0.177300732	0.184350396	0.194430401	0.180227629	0.179005311	0.181166691	0.178588823	0.179866056	0.177233646	0.214861927	0.183702681	0.226694979	0.199785736	0.177330786	0.26497626	0.192768327	0.248582282	0.184536882	0.217445547	0.181097664	0.403568675	0.312957396	0.368038177	0.234623141	0.189419771	0.337371651	0.221099941	0.188879119	0.192366478	0.192666577	0.177683688	0.210499619	0.309767056	0.620023291	0.231401278	0.271883852	0.247612417	0.269062425	0.097333958	0.226519155	0.365549237	0.720214883	0.202654729
552	0.182422911	0.184573076	0.181424871	0.182160003	0.221547635	0.200946436	0.181406135	0.189023552	0.19901263	0.184591097	0.183273858	0.18528638	0.182824454	0.184206159	0.181339531	0.222356788	0.188325989	0.235645058	0.205732215	0.181452831	0.280160373	0.198102166	0.26081347	0.189223131	0.22524182	0.185217122	0.456377278	0.339018118	0.409740609	0.244675396	0.194481796	0.3700465	0.229335285	0.193898122	0.197664299	0.197991258	0.181836788	0.217512345	0.335009012	0.725423619	0.240995834	0.288435562	0.25968481	0.285051739	0.086624234	0.235447191	0.406498445	0.822238974	0.208871592
553	0.186660857	0.189165934	0.185729123	0.186394425	0.227414388	0.206902688	0.1857024	0.193966507	0.203819659	0.18918105	0.187755932	0.189590231	0.187269152	0.188769693	0.18563651	0.230619307	0.193211943	0.245684204	0.212150355	0.185768347	0.298156675	0.203805569	0.274981569	0.194181018	0.233869258	0.189520865	0.524839742	0.371644139	0.463690674	0.256084366	0.199871006	0.411733195	0.238497074	0.199237758	0.203325837	0.203684014	0.186187564	0.225195106	0.366516304	0.824517946	0.251833801	0.308232779	0.27364998	0.304107005	0.079542093	0.245459227	0.459437175	0.889280173	0.215608064
554	0.191098795	0.194013426	0.19024675	0.190828915	0.233641035	0.213327417	0.190210757	0.199214939	0.208875898	0.194025066	0.192476782	0.19409762	0.191947376	0.193583701	0.190145871	0.239806073	0.198394843	0.25706486	0.219119532	0.190299048	0.319838474	0.20993468	0.29162886	0.199446569	0.243502562	0.194028302	0.611054046	0.413161125	0.533299949	0.269189249	0.205634553	0.465500278	0.248787965	0.204943825	0.209405957	0.20980066	0.190758458	0.23367764	0.406506651	0.88784534	0.264217031	0.332318854	0.290034245	0.327200974	0.07508683	0.256806133	0.527790114	0.906071576	0.222955119
555	0.195758775	0.199147955	0.195002517	0.195485581	0.240271503	0.220298601	0.194955728	0.204811148	0.214209397	0.199155426	0.197465836	0.198830745	0.196887587	0.198679804	0.194892202	0.250117603	0.203915278	0.270118569	0.22673778	0.195070043	0.346411054	0.21655761	0.31149368	0.205062522	0.254366765	0.198761674	0.710557633	0.466531816	0.620115432	0.284442274	0.211829129	0.534593338	0.26047106	0.211071309	0.215971136	0.21640889	0.195575467	0.243124417	0.457844747	0.90204439	0.278545639	0.362135436	0.309553387	0.355677723	0.07251867	0.269817291	0.613356278	0.883897465	0.231025928
556	0.200666212	0.204607689	0.200025185	0.200389916	0.247356806	0.227912261	0.199965776	0.210805628	0.219852524	0.204610144	0.202757581	0.203815148	0.202123082	0.204095202	0.199904049	0.261813408	0.209821594	0.285285472	0.23512728	0.200110519	0.379526003	0.223757651	0.335586896	0.211079917	0.266754867	0.203746572	0.805907764	0.534841102	0.718656186	0.302452367	0.218523418	0.620352993	0.273891673	0.217686716	0.223102563	0.223591458	0.200668863	0.253746093	0.523649952	0.878778451	0.295355513	0.399642141	0.333186727	0.391371731	0.071305138	0.284929836	0.711389008	0.841202934	0.239962609
557	0.205850573	0.210437919	0.20534838	0.205571491	0.254956429	0.236287873	0.205274155	0.217259157	0.225842821	0.210434313	0.208392725	0.209080384	0.207693096	0.209873979	0.205214776	0.275233555	0.216171856	0.303156675	0.244442	0.205454625	0.421383861	0.231637681	0.365292174	0.217560221	0.281053143	0.209012619	0.870657865	0.619263354	0.810617727	0.324047121	0.225801408	0.717222296	0.289508615	0.224871239	0.230900378	0.23145054	0.206074136	0.265815802	0.605585615	0.835811919	0.31537192	0.447374117	0.362275132	0.436689107	0.071065879	0.302730687	0.804570713	0.788830961	0.249945686
558	0.211346194	0.216692731	0.211011627	0.211064775	0.263139902	0.245575436	0.210919927	0.224245421	0.232224014	0.216681771	0.214419614	0.214660814	0.213644131	0.21606871	0.21086358	0.290828031	0.223036293	0.324531249	0.25487783	0.211142541	0.474678267	0.240325872	0.402467215	0.224578	0.297775646	0.214594256	0.889921202	0.714324459	0.870489408	0.350352782	0.233766637	0.807378775	0.307936755	0.232724797	0.239489163	0.24011339	0.211833124	0.279691258	0.699568603	0.783442862	0.339580207	0.50817366	0.398623134	0.494440372	0.0715279	0.324013114	0.867373187	0.731993958	0.261206734
559	0.217193305	0.223437192	0.217061675	0.216910175	0.27198869	0.255965146	0.216949267	0.231854494	0.239047258	0.223417265	0.220896058	0.220596594	0.220031683	0.222742547	0.216896808	0.309197558	0.230500536	0.350491146	0.266686564	0.217221838	0.541986227	0.249983449	0.449472122	0.232224456	0.317611894	0.220531745	0.871574456	0.802862341	0.885744451	0.382887658	0.242547914	0.866213775	0.330005099	0.241371461	0.249025385	0.249740012	0.217995472	0.295845588	0.790338485	0.726713493	0.369313573	0.583951296	0.444540031	0.566887468	0.072494562	0.349851206	0.885752001	0.673486439	0.27404591
560	0.22343934	0.230750211	0.223554214	0.223155355	0.281598418	0.267700715	0.223417131	0.240197477	0.246372698	0.230719287	0.227891725	0.226934931	0.226922485	0.229971958	0.223369639	0.331149058	0.238669928	0.382488162	0.280195328	0.223749244	0.623726479	0.260815314	0.50888569	0.240612152	0.341490585	0.226872425	0.831897272	0.861156942	0.865379473	0.423632394	0.252307079	0.881572313	0.356831572	0.250966822	0.259707585	0.260533679	0.224620516	0.314909942	0.854293852	0.668325705	0.406337941	0.672386585	0.502604039	0.65297193	0.073824145	0.381686698	0.867447276	0.61470174	0.288856364
561	0.230140527	0.238728193	0.230555993	0.229856853	0.292081308	0.281097253	0.23038934	0.249412538	0.254271327	0.2386837	0.235491159	0.233731604	0.234397334	0.237850211	0.230348181	0.357764285	0.247675109	0.422404607	0.295832732	0.23079283	0.713866257	0.273084254	0.582315068	0.249881164	0.370654756	0.233672246	0.781608645	0.877191336	0.82492764	0.474946127	0.263249281	0.861863099	0.389902049	0.261707714	0.271789976	0.272754976	0.23177963	0.33772889	0.876639819	0.609647787	0.45285111	0.761921988	0.574599002	0.743445506	0.075414434	0.42139093	0.828070938	0.556324102	0.306157051
562	0.237363985	0.247489969	0.238147642	0.237082197	0.303568908	0.296566143	0.237945331	0.25967318	0.262827334	0.247428617	0.243797836	0.241052939	0.242554876	0.246492067	0.237912248	0.390473304	0.257679656	0.472471274	0.314164976	0.238434923	0.796095781	0.287130697	0.667352007	0.260207511	0.406729992	0.240997757	0.726166117	0.858540087	0.774388354	0.538978318	0.275637233	0.82200183	0.431111192	0.273845694	0.285601361	0.286741345	0.239559362	0.365428821	0.862403679	0.55135537	0.51116216	0.831759566	0.658687137	0.818953844	0.077192135	0.471188516	0.778076841	0.498703036	0.326637412
563	0.24519022	0.257182999	0.246427122	0.244912441	0.316214542	0.314646988	0.246181529	0.271198843	0.272140793	0.257100548	0.252939216	0.248978154	0.25151632	0.256039685	0.246158757	0.431081736	0.268889848	0.534719935	0.33594089	0.246775678	0.849601294	0.303398285	0.753277723	0.271813964	0.451704094	0.248928463	0.668530696	0.81951371	0.718947703	0.615879748	0.289809661	0.771930996	0.482617244	0.287704487	0.301569598	0.302932377	0.248065289	0.39947798	0.825776955	0.493800915	0.582508573	0.864611777	0.745115278	0.860190571	0.079104963	0.533126353	0.722898512	0.442054021	0.351211024
564	0.253716339	0.267991596	0.255514219	0.253445432	0.330195301	0.336048579	0.255215725	0.284269067	0.282330927	0.267882531	0.263073407	0.257602327	0.261431623	0.266670415	0.255206151	0.481630379	0.281567698	0.609393499	0.36214534	0.255937728	0.864020036	0.322467415	0.821148392	0.284984489	0.507628829	0.257559819	0.610263863	0.770070082	0.661417151	0.700354402	0.306205883	0.716845071	0.54618896	0.303703239	0.3202538	0.321903001	0.257427051	0.441686971	0.777580732	0.437210889	0.664345443	0.859746194	0.815508046	0.862552601	0.081116054	0.607517601	0.665473588	0.386617466	0.381072938
565	0.263060374	0.280148339	0.2655567	0.262800199	0.345712879	0.361699573	0.265193071	0.299243198	0.293540213	0.28000543	0.27439838	0.267040369	0.272488045	0.278607638	0.265200451	0.543774607	0.296049105	0.691736601	0.394052257	0.266072576	0.845934891	0.345099144	0.854461423	0.300084338	0.57559843	0.267007231	0.552153153	0.715411195	0.603274407	0.778473291	0.325399266	0.659553474	0.621414923	0.322388309	0.342386731	0.344407012	0.267805282	0.494000614	0.723549488	0.381847985	0.746547997	0.829251745	0.85249359	0.836477539	0.083199906	0.689768325	0.607353937	0.332824258	0.417736984
566	0.273366487	0.293948432	0.276737908	0.273122271	0.362990791	0.392792185	0.276293473	0.316584962	0.305938724	0.293762118	0.28716351	0.277431702	0.284920844	0.292134372	0.276322729	0.617096629	0.312766547	0.768905577	0.433228083	0.277368487	0.808165647	0.372281023	0.85171934	0.317585071	0.653367709	0.277410774	0.494624894	0.658400063	0.545283841	0.831726473	0.348136358	0.601565322	0.702429481	0.344470877	0.368919983	0.371422753	0.279400197	0.557713012	0.666814543	0.328180454	0.81159124	0.784692608	0.852950704	0.79429908	0.085339177	0.767231157	0.549341899	0.281465651	0.462960758
567	0.28481154	0.309768182	0.28928654	0.284590373	0.382265316	0.430780368	0.288741085	0.336892767	0.319728682	0.309525744	0.301684478	0.288946045	0.29902708	0.307610815	0.288798714	0.696089246	0.332277372	0.823401068	0.481368189	0.290060665	0.759895719	0.405257069	0.823306685	0.338095309	0.732099579	0.288941039	0.437963175	0.600595119	0.487870209	0.84964974	0.375376949	0.543674119	0.775687076	0.370866782	0.40105661	0.404183814	0.292462673	0.631547378	0.609095242	0.277049166	0.844464291	0.732819615	0.826557078	0.743680652	0.087522419	0.82241759	0.491880067	0.233804871	0.518345461
568	0.297612664	0.328086314	0.303488162	0.297424188	0.403766223	0.477235505	0.302815497	0.360930668	0.335148155	0.327770785	0.318360701	0.301789899	0.315181833	0.325494681	0.302910113	0.76818039	0.355293597	0.843966244	0.539734971	0.304443252	0.706246053	0.445488321	0.780356147	0.362391879	0.796397812	0.301805676	0.3824749	0.542819059	0.431326484	0.835873591	0.408312644	0.486320286	0.824504995	0.402719319	0.440223403	0.444142722	0.30730731	0.708859984	0.551300582	0.229760737	0.842897469	0.677335746	0.784711951	0.688820526	0.089742463	0.843802049	0.435266038	0.191483641	0.584270416
569	0.312037749	0.349511781	0.319701256	0.311895121	0.427679563	0.533356701	0.318867317	0.389658517	0.352474077	0.34910054	0.33769889	0.3162153	0.333860298	0.346368011	0.319010403	0.81728463	0.382713402	0.833004287	0.607784229	0.320886037	0.650014894	0.494433906	0.729685901	0.391449345	0.831614526	0.316258247	0.328661814	0.48552792	0.375985239	0.801584087	0.448324969	0.429809924	0.839790179	0.441373169	0.487885633	0.492760914	0.324330522	0.776205492	0.493926673	0.187989014	0.816163755	0.620290739	0.734640478	0.632038556	0.091995302	0.833481686	0.379824786	0.156086942	0.657736583
570	0.32841668	0.374807684	0.338374669	0.328337897	0.454079725	0.598698862	0.337335148	0.424222088	0.372019388	0.374270864	0.360336154	0.332528527	0.355660144	0.370961256	0.337542038	0.834323504	0.415622458	0.800748299	0.68073506	0.339852573	0.592780521	0.552842087	0.675034958	0.426426704	0.834198125	0.332607052	0.277396654	0.429050546	0.322400223	0.755815937	0.496728794	0.374498459	0.825470009	0.488164398	0.54491874	0.550820899	0.344029869	0.818778931	0.43731357	0.153260716	0.774620747	0.562812012	0.680296234	0.574622678	0.094279179	0.801618103	0.326089985	0.128401219	0.729854767
571	0.347149543	0.404890954	0.360060026	0.347159136	0.482835531	0.669250393	0.358757789	0.465837995	0.394119572	0.404190188	0.387049361	0.351095279	0.381312598	0.40015634	0.359048842	0.821882496	0.455210441	0.756398802	0.74815647	0.361912886	0.535417963	0.619380549	0.618572616	0.468543282	0.81111738	0.351220393	0.230003688	0.37375617	0.271494784	0.703952447	0.554121497	0.320952697	0.791510783	0.543859738	0.610350314	0.617085088	0.36701677	0.829617889	0.38181619	0.126286597	0.725088103	0.505532237	0.623972198	0.517289221	0.096593965	0.757486822	0.274954784	0.108076189	0.786946561
572	0.368717565	0.440792993	0.385425694	0.368848849	0.51345942	0.735573712	0.383788308	0.515450071	0.419102476	0.43988172	0.418749107	0.372346477	0.411683407	0.434958122	0.384190256	0.789521997	0.502505995	0.705450652	0.796345481	0.387757194	0.478423959	0.688481154	0.561485765	0.518713426	0.77230085	0.372532493	0.188167199	0.320232496	0.224666961	0.648942772	0.618981122	0.270127436	0.746415663	0.607403432	0.679269605	0.686154886	0.394028136	0.813196943	0.327980867	0.10657796	0.671297757	0.448848136	0.566927576	0.460466782	0.098940823	0.706658783	0.2277863	0.093856706	0.817061925
573	0.393674833	0.483470609	0.415234569	0.393972375	0.544961662	0.785020125	0.413173849	0.572918935	0.447222293	0.482299298	0.456382677	0.396765162	0.447697464	0.476333434	0.413720743	0.745570526	0.557707788	0.651064303	0.816273044	0.418170585	0.422179156	0.749687758	0.504464479	0.576699554	0.724662868	0.397030306	0.153414483	0.269446013	0.183606894	0.592539995	0.685868846	0.223430221	0.695236705	0.674152255	0.741854741	0.747731286	0.42589105	0.778678722	0.276711541	0.092854745	0.615460344	0.393136467	0.509891329	0.404527253	0.101321847	0.652334895	0.186266729	0.084280382	0.817577797
574	0.422619446	0.533383585	0.450273757	0.423141254	0.575735462	0.808026454	0.447690567	0.635698459	0.478548437	0.531915272	0.500696426	0.424852827	0.490147177	0.524843088	0.448423325	0.695218276	0.619019056	0.5950639	0.808493969	0.453954735	0.367110331	0.790882194	0.447949159	0.639753824	0.672221789	0.425219487	0.126448012	0.22281838	0.149791606	0.535726696	0.744804767	0.182565646	0.640859033	0.734895106	0.785961409	0.78967796	0.463420991	0.733761857	0.22936603	0.083640984	0.558830807	0.338915234	0.453318816	0.349946429	0.103739915	0.596362805	0.151912346	0.078069196	0.794723704
575	0.456098832	0.589553964	0.491139737	0.456916434	0.603576583	0.804028617	0.487942686	0.697288875	0.512761839	0.587799336	0.551640976	0.457034651	0.539194196	0.579795477	0.488904346	0.641397781	0.681039193	0.538494866	0.780458065	0.495692117	0.313885493	0.805356276	0.392349459	0.701107742	0.617287414	0.457528397	0.106755709	0.182054329	0.123742866	0.479084894	0.784553005	0.148966257	0.584964937	0.778312884	0.803938618	0.805039626	0.507128829	0.682989813	0.187635687	0.077697738	0.50212953	0.287036384	0.397616264	0.297498573	0.106198582	0.539801913	0.125326002	0.074269938	0.756975841
576	0.494429176	0.648538396	0.537855129	0.495622263	0.626007598	0.779036162	0.534000511	0.748038765	0.548953755	0.646601611	0.607548724	0.493496714	0.593636853	0.638253349	0.535223963	0.585916133	0.734910598	0.482006644	0.739885546	0.543331338	0.263543501	0.79451431	0.338214695	0.750956991	0.561276161	0.49414301	0.093062634	0.148593632	0.104875755	0.42305732	0.798539169	0.123166711	0.528573555	0.796743006	0.796122551	0.794953475	0.556728435	0.629115794	0.153042393	0.074082851	0.445849049	0.238770802	0.343313184	0.248362415	0.108701968	0.483308986	0.105996735	0.072183717	0.71062538
577	0.537314534	0.703479938	0.589104485	0.538953173	0.640765669	0.740659817	0.584672067	0.778685847	0.585328027	0.701586482	0.66393448	0.533854924	0.649741127	0.693957793	0.586153916	0.529800361	0.770941671	0.426055721	0.692054908	0.595371452	0.217580327	0.765320723	0.28641915	0.780211661	0.504992738	0.534671081	0.083883077	0.122914615	0.091817186	0.368118653	0.788223821	0.104499586	0.472285715	0.790320064	0.769034779	0.766281264	0.610209265	0.573721487	0.126234749	0.07213243	0.390431698	0.195778	0.291247506	0.204143387	0.111254806	0.427342336	0.092580965	0.071324516	0.659391129
578	0.583352724	0.745622824	0.641480358	0.585462626	0.646356077	0.694391844	0.636757921	0.785277306	0.619186156	0.744064771	0.713534313	0.576759432	0.700954485	0.738402674	0.638424682	0.473699324	0.783606718	0.371128053	0.640135641	0.648101173	0.177699099	0.724650087	0.23826323	0.785332921	0.448978827	0.577741401	0.077964629	0.104357643	0.083102719	0.314961065	0.759885193	0.091599961	0.416571472	0.764733944	0.729686564	0.725936949	0.663114217	0.517775871	0.106707712	0.071370325	0.336465254	0.159660801	0.242677727	0.166505997	0.113862412	0.372385552	0.083606026	0.071343052	0.605524891
579	0.629507769	0.767908321	0.689194651	0.632021764	0.64235238	0.64358744	0.684702598	0.770334772	0.647224716	0.766914655	0.748287832	0.61949389	0.739308357	0.764078244	0.686391166	0.418106926	0.773855968	0.317912416	0.586041094	0.695408383	0.145244479	0.677220037	0.195404382	0.769194302	0.393714564	0.620600332	0.074371467	0.09154861	0.077516457	0.264650044	0.720076414	0.083003295	0.361952031	0.726673243	0.683070345	0.678707552	0.708667261	0.461900603	0.093150525	0.071457669	0.284850971	0.131300977	0.199239199	0.136533965	0.116530742	0.31912093	0.077833707	0.071989519	0.550398801
580	0.671035756	0.768415176	0.725291421	0.673759598	0.629332729	0.590267806	0.721653089	0.739791689	0.666292745	0.768051296	0.762968704	0.65794984	0.758754593	0.768134606	0.723142923	0.363558405	0.747021845	0.267465948	0.53093913	0.730220559	0.120545645	0.625877164	0.159433875	0.737825335	0.339806059	0.659094003	0.072437927	0.083023094	0.074163388	0.218682406	0.673387035	0.077505966	0.309182085	0.681067045	0.632222637	0.627486531	0.73976708	0.406597164	0.084080004	0.07215389	0.236921042	0.110406056	0.162557655	0.114176793	0.119266477	0.26859598	0.074348191	0.073085806	0.494854262
581	0.70248882	0.750107518	0.744273498	0.705125649	0.608491499	0.535714661	0.741973529	0.699272335	0.674251777	0.750291984	0.757206555	0.687434142	0.757705276	0.752772598	0.743068027	0.31080214	0.708919659	0.221256087	0.47558557	0.747273082	0.102838305	0.572409993	0.131227948	0.696778167	0.288146223	0.688496784	0.071685772	0.077570775	0.072397065	0.178759979	0.622706875	0.074210655	0.259384252	0.631054715	0.579047032	0.57409082	0.751936877	0.35243951	0.078238932	0.073284497	0.194337591	0.095790817	0.133605437	0.098394244	0.122077084	0.22226921	0.072487329	0.07450251	0.43948031
582	0.719563301	0.7183016	0.744555285	0.721811591	0.58128371	0.480726333	0.74374655	0.652643973	0.670604531	0.718899397	0.734840356	0.704123151	0.739159274	0.723087334	0.744352967	0.260974361	0.663842036	0.180992473	0.420535269	0.745462767	0.090679222	0.517908793	0.110461576	0.649816175	0.240058739	0.704989374	0.07178245	0.074314789	0.071769108	0.146222657	0.56976326	0.072491626	0.214109437	0.578507988	0.524701725	0.519627469	0.74525589	0.300263973	0.07470612	0.074726672	0.158676626	0.08594474	0.112168867	0.08768342	0.124971023	0.181850146	0.071791859	0.076148666	0.384812455
583	0.720656592	0.677665367	0.728210928	0.722312125	0.549099813	0.425912118	0.728747787	0.602374151	0.65623716	0.678555052	0.700711915	0.706353083	0.707775179	0.683876623	0.728882724	0.215601344	0.614559219	0.14804467	0.366372825	0.727268773	0.082631627	0.46312634	0.095943356	0.599338105	0.197190807	0.706947848	0.072485159	0.072622444	0.071953562	0.121428801	0.515698972	0.071896261	0.175039262	0.524660188	0.469978618	0.464858802	0.723017689	0.251289268	0.072816382	0.076390374	0.130749838	0.079558313	0.09711801	0.080677943	0.127957829	0.148723554	0.071928036	0.077957856	0.331535158
584	0.706959904	0.631530075	0.699201031	0.707957589	0.513159693	0.371863621	0.700795712	0.550040051	0.63287926	0.632623331	0.658935654	0.69481858	0.667866886	0.638683736	0.700539336	0.176368053	0.562838561	0.122856078	0.313873009	0.696825273	0.077525394	0.408657859	0.086184849	0.54687867	0.161132405	0.695120584	0.073619681	0.072043344	0.072717275	0.103641438	0.461284937	0.072101815	0.143433781	0.470333359	0.415485108	0.410382807	0.689585455	0.207102718	0.072096184	0.078211248	0.11025113	0.075632818	0.086967794	0.076312392	0.131048337	0.123359305	0.072657196	0.079882922	0.280631854
585	0.681435282	0.582037588	0.661517902	0.681819445	0.474483425	0.319336733	0.663888863	0.496660637	0.602510606	0.58327378	0.612364891	0.67187032	0.622560478	0.589814314	0.663331757	0.144572077	0.509813445	0.104733753	0.26415563	0.658098156	0.074508775	0.355131596	0.079854743	0.493431608	0.132788511	0.671900699	0.075062551	0.072260731	0.073895264	0.091438749	0.407125529	0.072880625	0.119545104	0.416147307	0.361836264	0.356824103	0.648755775	0.169374777	0.072212628	0.080144309	0.095954213	0.073458503	0.080357953	0.073824011	0.134254963	0.105087992	0.073810487	0.081891224	0.233487507
586	0.647299411	0.530554352	0.61811166	0.647158703	0.43392782	0.26943672	0.621043041	0.442961463	0.566897823	0.531889969	0.562807974	0.640305975	0.573853448	0.538732042	0.620259274	0.120449225	0.456268705	0.092260889	0.218750722	0.613941418	0.072990888	0.303415505	0.075976201	0.439710323	0.111870432	0.640103952	0.07672622	0.07305072	0.075370348	0.083359825	0.353878148	0.074071223	0.102476572	0.36274102	0.309863732	0.305041228	0.603132846	0.139194482	0.072930559	0.082158421	0.086348538	0.072541459	0.076280299	0.072682902	0.137592112	0.092500948	0.075267984	0.083960477	0.191789196
587	0.607186677	0.47805753	0.5710403	0.606614765	0.392281142	0.223637189	0.5743745	0.389597174	0.527485482	0.479460142	0.511522942	0.602557635	0.52312566	0.486475097	0.573420531	0.103199107	0.402872127	0.083995198	0.179328155	0.566332417	0.072539658	0.25472824	0.073840175	0.386368488	0.097233605	0.602164885	0.078546333	0.074247981	0.07705605	0.078236444	0.302425392	0.075554229	0.090821154	0.310951345	0.260738095	0.256240631	0.554507553	0.116597735	0.074076383	0.084231365	0.080138905	0.072519381	0.074002329	0.072500773	0.14107641	0.084152683	0.076941158	0.086075039	0.157035167
588	0.563061294	0.425284629	0.521705468	0.562139421	0.350339244	0.183609153	0.525327706	0.337305955	0.485417327	0.42672743	0.459396073	0.56052965	0.471335229	0.433810006	0.524245896	0.09141632	0.350327419	0.078738821	0.147194055	0.516614993	0.072848514	0.21063713	0.072944954	0.334154698	0.087398444	0.559982747	0.080477591	0.075734659	0.078891093	0.075210657	0.253995209	0.077244674	0.083149302	0.261943162	0.215990219	0.211980795	0.504098217	0.100617416	0.075526364	0.086348199	0.076341177	0.073135	0.073005689	0.073001984	0.144727307	0.078837711	0.078767257	0.088224681	0.129953125
589	0.516315403	0.372921765	0.471088627	0.515109752	0.308994314	0.150734216	0.474911019	0.287079698	0.44161115	0.374378142	0.407138632	0.515621132	0.419221459	0.38142113	0.473734338	0.083648771	0.299550665	0.075617305	0.12271252	0.465734935	0.073700875	0.172790851	0.072937122	0.284080674	0.081023316	0.514950068	0.082488688	0.077427468	0.080832723	0.073680294	0.210162464	0.079082803	0.078311341	0.217243223	0.177285282	0.173915461	0.452777617	0.089783375	0.077193018	0.088499276	0.07425952	0.074206454	0.072925392	0.07399174	0.148567779	0.075674476	0.080702465	0.090403098	0.110157181
590	0.467964552	0.321791618	0.419964786	0.466529883	0.269300885	0.125496482	0.423912371	0.240271091	0.396872453	0.323229859	0.355479394	0.468872122	0.367499099	0.330100171	0.422668855	0.078740771	0.251802252	0.074018759	0.105148389	0.414450964	0.074941433	0.142345952	0.073563708	0.237521217	0.077104621	0.468101786	0.084557999	0.079267039	0.08285102	0.073219325	0.172568789	0.081026357	0.075487101	0.17851543	0.145877743	0.14322685	0.401277077	0.082692409	0.079013924	0.090678574	0.073404451	0.075603255	0.073500239	0.075330295	0.152625176	0.074046101	0.082716095	0.092606666	0.096402612
591	0.418825914	0.273002522	0.369074563	0.417210435	0.232468644	0.107273978	0.373071731	0.19851714	0.352012287	0.274381649	0.305331764	0.42112277	0.317027802	0.280901849	0.371788929	0.07586616	0.208668373	0.073508959	0.093108604	0.363506456	0.076458289	0.119438086	0.074642723	0.196122206	0.074936213	0.420275214	0.08667079	0.081211175	0.084925241	0.073522065	0.142355663	0.083045618	0.074101018	0.147030371	0.122049034	0.120087565	0.350357476	0.078263712	0.080944659	0.092882633	0.073425785	0.077231423	0.074542339	0.076916978	0.156932311	0.073514981	0.084786844	0.094833665	0.087199113
592	0.369675146	0.228014929	0.319290881	0.367926375	0.199730181	0.09471564	0.323247456	0.163352709	0.307963542	0.229284558	0.257929055	0.373159842	0.268960741	0.235232571	0.321957166	0.074448298	0.171760872	0.073778669	0.085149379	0.313796388	0.078171986	0.103144073	0.076044742	0.161393528	0.074022621	0.372257041	0.088817467	0.083230605	0.087041497	0.074370944	0.119613772	0.085120269	0.073745804	0.123070839	0.104987275	0.103601721	0.30097484	0.075736609	0.082954349	0.0951099	0.074074093	0.079024374	0.075918071	0.078680392	0.161529185	0.073769492	0.086900425	0.097083793	0.081273432
593	0.32139932	0.18846118	0.271751187	0.319570529	0.172071305	0.086384384	0.275552363	0.135613484	0.265856378	0.189569752	0.214807415	0.325861259	0.224770253	0.194716167	0.274294324	0.074070368	0.142141014	0.074603713	0.080112214	0.266493419	0.080025469	0.092054193	0.077676261	0.134111658	0.074004348	0.324928074	0.090991942	0.085304959	0.089190591	0.075608623	0.103443304	0.087236457	0.074125556	0.105882443	0.093315954	0.092367083	0.254387294	0.074566931	0.085021459	0.097360133	0.075168888	0.080934484	0.077530886	0.080569385	0.166464754	0.074583709	0.089047351	0.09935774	0.077681258
594	0.275114317	0.155706218	0.227894684	0.273270328	0.149960186	0.081082904	0.231401663	0.115093383	0.227008086	0.156617079	0.177557255	0.280308596	0.186066397	0.160798777	0.23022393	0.074433151	0.119878135	0.075823714	0.077151047	0.223068799	0.081978499	0.084784167	0.079470622	0.114005138	0.074623445	0.27937542	0.093190728	0.087420501	0.091366805	0.077122548	0.092446414	0.089385121	0.075028272	0.094113928	0.08562757	0.084993048	0.212130737	0.074365157	0.087131414	0.09963408	0.076581062	0.082928342	0.079311925	0.082547993	0.171799713	0.075795998	0.091221699	0.101656952	0.075749994
595	0.232209467	0.130312437	0.189309538	0.230428163	0.133223814	0.077933763	0.192380801	0.100705625	0.192768342	0.131018393	0.14733165	0.237837785	0.154156142	0.134207054	0.191333325	0.075323455	0.104070464	0.07732463	0.075670499	0.18510967	0.084003146	0.08023581	0.081380848	0.099948212	0.075696348	0.236941262	0.095412219	0.089568307	0.09356694	0.078832743	0.08524045	0.091560676	0.076303214	0.086352172	0.080782025	0.080370811	0.175762909	0.07485329	0.089274691	0.101933231	0.078218814	0.08498293	0.081212621	0.084591364	0.177610354	0.077291426	0.093420118	0.103983466	0.075004816
596	0.194225004	0.111851963	0.157357725	0.192590137	0.121190535	0.076307686	0.159889026	0.09102022	0.164233141	0.112376292	0.124419953	0.199941477	0.129578385	0.114685564	0.159010573	0.076586291	0.093330513	0.079023581	0.075239231	0.153919356	0.086079821	0.077608444	0.083373353	0.090506084	0.077089632	0.199121361	0.097656078	0.091742683	0.095789481	0.080681299	0.080718842	0.093759865	0.077840796	0.081435306	0.077942349	0.077690654	0.146417689	0.07582882	0.091445159	0.104259612	0.080015545	0.087082258	0.083198216	0.086682163	0.183992174	0.078986461	0.095640988	0.106339758	0.075099365
597	0.162480069	0.099021668	0.132543139	0.161059179	0.112902166	0.075784277	0.134513941	0.084733909	0.141796085	0.099402534	0.107973979	0.167950659	0.11170658	0.101017037	0.133815826	0.078117679	0.086283183	0.080865225	0.075565896	0.129881877	0.088196295	0.076371294	0.08542642	0.08439479	0.078713783	0.167239827	0.099923101	0.093940772	0.09803441	0.082629922	0.078129021	0.095981477	0.079567556	0.078563074	0.076553726	0.076415844	0.124190217	0.077155886	0.093639666	0.10661577	0.081927022	0.089216525	0.0852462	0.088809682	0.19107212	0.080825316	0.097884215	0.108728757	0.075799879
598	0.137582739	0.09042701	0.114382709	0.136405565	0.107467416	0.076045973	0.115854495	0.080883067	0.125106511	0.090701551	0.096661649	0.142571105	0.099291049	0.091801243	0.115319812	0.079839789	0.081886302	0.082808585	0.076431614	0.112403642	0.090344122	0.076125852	0.087524482	0.080669424	0.080501884	0.141985162	0.102214691	0.09616117	0.100302489	0.084650551	0.076921014	0.09822536	0.081428752	0.077153769	0.076200617	0.076143636	0.108253741	0.078732764	0.095856586	0.10900459	0.083920694	0.091379111	0.087340404	0.09096662	0.199014383	0.082766678	0.100150505	0.111153709	0.076931366
599	0.119152327	0.084932732	0.101696653	0.118206143	0.104162249	0.076863708	0.102769268	0.078780586	0.113266599	0.085130406	0.089189433	0.123573382	0.091004678	0.085857945	0.102366752	0.081696913	0.079395758	0.08482484	0.077679206	0.100258345	0.092518026	0.076582864	0.089657118	0.078656073	0.082406206	0.123107284	0.104532795	0.0984037	0.102595164	0.086723732	0.076694161	0.100492265	0.083385541	0.076784027	0.076581078	0.076581615	0.097308064	0.080486341	0.098095579	0.111429307	0.085973851	0.093566055	0.089469977	0.093148525	0.208039773	0.08478148	0.102441256	0.113618205	0.078368056
600	0.106156341	0.081662719	0.093196186	0.105403393	0.102412309	0.078077391	0.093968784	0.077919757	0.105237871	0.081805596	0.084504647	0.110044754	0.08573368	0.082267747	0.093666245	0.083650569	0.078259627	0.086894538	0.079198473	0.092162216	0.094715158	0.077540089	0.09181786	0.077858485	0.084393917	0.109680236	0.106879819	0.100669147	0.104914434	0.088836628	0.077165188	0.102783658	0.085411387	0.077153494	0.077483863	0.077525305	0.090099677	0.082365768	0.100357309	0.113893498	0.088071361	0.095775436	0.091628148	0.09535313	0.218450241	0.086850098	0.104758436	0.116126188	0.080021762
601	0.097383737	0.079972171	0.087764672	0.096780239	0.101784784	0.079571811	0.088319412	0.077939454	0.100071558	0.080076158	0.081808911	0.100831316	0.082620576	0.080349885	0.088089723	0.085673744	0.078083774	0.089004451	0.080910289	0.087023528	0.096934274	0.078852179	0.094002847	0.077923112	0.086442106	0.100546218	0.109258528	0.10295895	0.107262715	0.090980787	0.078131565	0.105101517	0.087487933	0.078047657	0.078757231	0.078827767	0.0856006	0.084335059	0.102643125	0.116401078	0.090203113	0.098006688	0.093810834	0.097579615	0.230665145	0.088959177	0.107104429	0.118681972	0.081829361
602	0.091737596	0.079403974	0.084536792	0.091244704	0.101965089	0.0812657	0.084935728	0.078585324	0.09699811	0.079480376	0.080527522	0.094845421	0.081042947	0.07962041	0.084758219	0.087748093	0.078590744	0.091146032	0.082759117	0.084004812	0.099175345	0.080416413	0.096210176	0.078600896	0.088535345	0.094619573	0.111672027	0.105275077	0.109642788	0.093151049	0.079450076	0.107448246	0.089602994	0.079314848	0.080293923	0.080385152	0.083037769	0.086369475	0.104954923	0.118956333	0.092362773	0.10026027	0.096015979	0.099828257	0.245285553	0.091100082	0.109481991	0.121290277	0.083746742
603	0.088347812	0.07963139	0.082875928	0.087934908	0.102724988	0.083101192	0.083164078	0.079675225	0.095431606	0.079688202	0.080248661	0.091204047	0.080553842	0.079733318	0.083023692	0.089861225	0.079581921	0.093313931	0.084705704	0.082492613	0.101439184	0.082159427	0.098439286	0.079713476	0.090663341	0.091021286	0.114123731	0.1076199	0.112057752	0.095344499	0.081018182	0.109826595	0.091748606	0.080846449	0.082017302	0.082123284	0.081849368	0.088452017	0.107295014	0.121563944	0.094546581	0.102537363	0.098242907	0.102100098	0.263186507	0.0932674	0.111894196	0.123956278	0.085742917
604	0.086569188	0.080423579	0.082327584	0.086213528	0.103902081	0.085037861	0.082537079	0.081080307	0.094943446	0.080466465	0.0806813	0.089242835	0.080837217	0.080444174	0.082423057	0.092005151	0.080916812	0.095505161	0.086722921	0.082049805	0.103727253	0.08402972	0.100690618	0.081134677	0.092819596	0.089091023	0.116617381	0.109996143	0.114511021	0.097559883	0.082763551	0.112239636	0.093919925	0.082565799	0.083873529	0.083990077	0.081636382	0.090571423	0.109666069	0.124229044	0.096752679	0.104839712	0.100491977	0.104396775	0.285679752	0.095458097	0.114344433	0.126685666	0.087796655
605	0.08593673	0.081616797	0.082569019	0.085621849	0.105381175	0.08704765	0.082722688	0.082709255	0.095225119	0.081649773	0.081619108	0.088479218	0.081669034	0.081579608	0.082627383	0.094174974	0.082495803	0.097718393	0.088792223	0.082366145	0.106041505	0.0859913	0.10296534	0.082775095	0.095000275	0.088349502	0.119157055	0.112406846	0.117006326	0.099797124	0.084635273	0.114690749	0.096114295	0.084418888	0.085824937	0.085949125	0.082115828	0.092720465	0.112071077	0.126957277	0.098980555	0.107169495	0.102764295	0.106720383	0.314781575	0.097670813	0.116836409	0.129484735	0.089893625
606	0.08611825	0.083094743	0.083370937	0.085832357	0.107080789	0.089111305	0.083484978	0.084497481	0.096056101	0.083120659	0.082915511	0.08856706	0.082890142	0.083016474	0.083402966	0.096367984	0.08424837	0.099953483	0.090901157	0.08322124	0.10838428	0.088019233	0.105265162	0.084571511	0.097203427	0.088453067	0.121747205	0.114855347	0.119547735	0.102056989	0.086597721	0.117183624	0.098330611	0.086367864	0.087845396	0.087975196	0.083086701	0.094894767	0.114513326	0.129754879	0.101230656	0.109529249	0.105061525	0.109073381	0.353652163	0.09990538	0.11937416	0.132360469	0.092024383
607	0.086877134	0.084774937	0.084570365	0.086611831	0.10894349	0.091215848	0.084656254	0.086399524	0.097279432	0.084795811	0.084466427	0.089259349	0.084387495	0.084667399	0.084583692	0.098583026	0.086124793	0.10221114	0.093041606	0.084458449	0.110758249	0.090096475	0.107592216	0.086479443	0.099428447	0.089156524	0.124392693	0.117345289	0.122139678	0.104340873	0.088626192	0.119722279	0.100568882	0.088386432	0.089917003	0.090051032	0.08440616	0.097091982	0.116996405	0.132628759	0.103504134	0.11192182	0.107385758	0.111458549	0.407227606	0.102162489	0.121962089	0.135320654	0.094182958
608	0.088045644	0.086599264	0.086051897	0.087794948	0.110929096	0.093352799	0.086117762	0.088383714	0.098784121	0.086616525	0.086198336	0.090380865	0.086081187	0.086470776	0.086051923	0.10082007	0.088090364	0.104492708	0.095208551	0.085966862	0.11316638	0.092211652	0.109948983	0.088467923	0.101675703	0.09028596	0.127098846	0.119880635	0.124786998	0.10665065	0.09070385	0.122311088	0.102829925	0.090456616	0.092027771	0.092165107	0.085973105	0.099311213	0.119524219	0.135586619	0.105802671	0.114350345	0.109739444	0.113878957	0.482849427	0.104443472	0.124604999	0.138374018	0.096365864
609	0.089505615	0.088527204	0.087734367	0.08926525	0.11300981	0.095516909	0.087785965	0.090428337	0.100492323	0.088541861	0.088059775	0.09180818	0.087915221	0.088383605	0.087724912	0.103079905	0.090121204	0.106800017	0.097399201	0.087668492	0.115611928	0.09435746	0.112338251	0.090515735	0.10394628	0.091718874	0.129871534	0.122465702	0.127494999	0.108988576	0.092819513	0.12495483	0.105115166	0.092566431	0.094169964	0.094310008	0.087716502	0.101552623	0.122101022	0.138637092	0.108128369	0.116818252	0.112125338	0.116337965	0.589387596	0.10675015	0.127308156	0.141530402	0.098571401
610	0.091173693	0.090530629	0.089560688	0.09094059	0.11516651	0.097705191	0.089602089	0.092518673	0.102349441	0.090543393	0.090014812	0.093454245	0.08985043	0.090375985	0.089544443	0.105363923	0.092201053	0.109135278	0.099612331	0.089508514	0.118098436	0.096529447	0.114763088	0.092608516	0.106241797	0.093368877	0.13271724	0.125105196	0.130269518	0.111357227	0.09496597	0.127658737	0.107426487	0.094708087	0.09633882	0.096481208	0.089586478	0.103817127	0.124731448	0.1417899	0.110483668	0.119329269	0.11454648	0.11883923	0.72905302	0.109084724	0.13007735	0.144800967	0.100799126
611	0.092991406	0.092590275	0.091491004	0.092763348	0.117386267	0.099916274	0.091525085	0.094644996	0.104317445	0.092601647	0.092038633	0.095258002	0.091859701	0.092427396	0.091469862	0.107673972	0.094319091	0.111501023	0.101847836	0.091448677	0.120629755	0.098725194	0.117226844	0.094736791	0.108564285	0.09517538	0.135643167	0.127804269	0.133117006	0.113759468	0.097138833	0.130428558	0.109766139	0.096876788	0.098531698	0.098676232	0.091548302	0.106106208	0.127420567	0.145056058	0.112871305	0.121887445	0.11700619	0.12138672	0.875204261	0.111449717	0.132918978	0.148198438	0.103049509
612	0.094918	0.094693192	0.093497747	0.094693369	0.11966057	0.102149944	0.093526535	0.096801133	0.106370063	0.094703523	0.094114347	0.097176883	0.09392451	0.094523993	0.09347303	0.11001227	0.096468364	0.113900065	0.104106427	0.093462552	0.123210068	0.100943735	0.119733156	0.096894568	0.110916112	0.097096144	0.138657355	0.130568577	0.136044623	0.116198435	0.099335727	0.133270645	0.112136678	0.099069868	0.100747473	0.100894074	0.093578044	0.108421781	0.13017394	0.14844812	0.115294292	0.124497187	0.119508072	0.123984753	0.969243759	0.11384794	0.135840137	0.15173742	0.105323685
613	0.096925289	0.096830911	0.095562072	0.096702892	0.121984072	0.104406827	0.095586992	0.098983427	0.108489344	0.096840443	0.096230684	0.099181425	0.096032427	0.096656669	0.095534701	0.112381338	0.098644661	0.11633549	0.106389419	0.095532101	0.125843931	0.103185142	0.122285972	0.099078316	0.113299941	0.099101943	0.141768825	0.133404361	0.13906036	0.118677539	0.101555709	0.136192039	0.114540944	0.101286174	0.102986104	0.103134779	0.095659439	0.110766113	0.132997701	0.15198048	0.117755911	0.127163299	0.122056041	0.126638037	0.983771067	0.116282468	0.138848744	0.155434786	0.107623294
614	0.098993971	0.098998124	0.097671303	0.098772917	0.124353694	0.106688162	0.097693354	0.101190005	0.110663213	0.099007024	0.098380347	0.101251419	0.098175333	0.098819669	0.097641911	0.114783977	0.100845714	0.118810652	0.108698581	0.097645222	0.128536318	0.105450245	0.124889582	0.101286255	0.115718701	0.101172732	0.144987753	0.136318534	0.142173175	0.12120048	0.10379886	0.139200591	0.116982036	0.103525635	0.105248332	0.105399153	0.097781643	0.113141765	0.135898636	0.155669744	0.120259725	0.129891044	0.124654345	0.129351718	0.949883821	0.11875665	0.141953671	0.159310153	0.109950365
615	0.101111071	0.101191786	0.099817161	0.100890683	0.126768021	0.108995655	0.099837038	0.103420277	0.112883786	0.101200168	0.100558876	0.103373243	0.100348181	0.101009623	0.099786179	0.117223246	0.103070646	0.121329188	0.111036044	0.099794041	0.131292681	0.107740433	0.127548658	0.10351786	0.118175584	0.103295009	0.148325684	0.139318795	0.145393171	0.123771271	0.106066014	0.142305094	0.119463326	0.105788971	0.107535482	0.107688571	0.099937675	0.115551569	0.138884298	0.159535205	0.122809596	0.132686201	0.127307615	0.132131444	0.898440468	0.121274115	0.145164919	0.163386498	0.11230725
616	0.103268081	0.103410456	0.101994472	0.103047832	0.129226865	0.111331384	0.102012656	0.105674572	0.115146155	0.103418391	0.102763815	0.105537925	0.102548099	0.103224861	0.101962187	0.119702472	0.105319579	0.123895039	0.113404246	0.101973675	0.134119021	0.110057528	0.130268307	0.105773508	0.120674055	0.105459885	0.151795789	0.142413761	0.148731802	0.126394273	0.108358557	0.145515456	0.121988466	0.108077483	0.109849325	0.110004841	0.102123285	0.117998616	0.141963128	0.163599432	0.125409716	0.135555152	0.130020905	0.134983446	0.839911702	0.123838796	0.148493821	0.167690939	0.114696579
617	0.105459653	0.105653837	0.104200265	0.105239126	0.13173096	0.113697731	0.104217083	0.107953895	0.117447538	0.10566137	0.104994139	0.107739783	0.104773761	0.105464919	0.104166863	0.122225257	0.107593361	0.126512487	0.115805891	0.104181359	0.137021972	0.112403695	0.133054132	0.10805424	0.123217864	0.107661738	0.155413192	0.145613123	0.15220213	0.129074237	0.110678302	0.148842893	0.124561412	0.110392917	0.112191982	0.112350117	0.104336162	0.120486259	0.145144617	0.16788903	0.128064645	0.13850497	0.132799761	0.137914623	0.77929781	0.126454966	0.151953294	0.17225574	0.117121245
618	0.107682684	0.107922466	0.10643314	0.107461539	0.134281762	0.116097347	0.106448809	0.110259754	0.119786692	0.107929621	0.10724985	0.109975477	0.107024953	0.107730213	0.106398731	0.124795502	0.109893383	0.12918619	0.11824394	0.106415841	0.140008905	0.114781391	0.135912305	0.110361592	0.125811077	0.10989727	0.159195364	0.148927844	0.155819141	0.131816359	0.113027405	0.152300182	0.127186464	0.112737372	0.114565872	0.114726847	0.106575379	0.123018131	0.148439486	0.172435607	0.130779362	0.14154354	0.135650289	0.140932651	0.718887882	0.129127274	0.155558148	0.177119617	0.119584392
619	0.109935686	0.110217499	0.10869283	0.109713639	0.136881307	0.11853314	0.108707487	0.112594056	0.122163503	0.110224282	0.109531705	0.112243347	0.109302272	0.110021805	0.108657472	0.127417445	0.112221456	0.131921244	0.12072161	0.108676962	0.143088055	0.117193338	0.138849666	0.112697492	0.128458117	0.112164852	0.163162661	0.152370412	0.159600159	0.134626347	0.115408312	0.155901982	0.129868301	0.115113246	0.116973682	0.117137743	0.108841013	0.125598166	0.151859934	0.177277113	0.133559326	0.144679699	0.138579253	0.144046129	0.659509485	0.131860802	0.1593255	0.182329557	0.122089432
620	0.11221829	0.112540541	0.110979864	0.111995095	0.139532106	0.121008263	0.110993586	0.114959018	0.124578671	0.112546948	0.111841004	0.114542905	0.111606893	0.112341231	0.110943575	0.130095681	0.114579718	0.134723219	0.123242373	0.11096533	0.146268626	0.119642499	0.141873795	0.115064177	0.131163789	0.114464017	0.167338805	0.155955051	0.163565228	0.137510475	0.117823723	0.159665119	0.132612025	0.117523191	0.119418338	0.11958576	0.111133848	0.128230626	0.155419844	0.182459156	0.136410523	0.147923358	0.141594141	0.147264684	0.601523218	0.134661108	0.163275134	0.187942662	0.124640045
621	0.114531009	0.114893586	0.113295409	0.114306451	0.142237118	0.123526134	0.113308231	0.117357145	0.127033568	0.1148996	0.114179495	0.116874587	0.113940472	0.114690426	0.113258178	0.132835245	0.116970603	0.137598268	0.12581	0.113282171	0.14956104	0.122132099	0.144993193	0.11746417	0.133933364	0.116795218	0.171751931	0.159698207	0.167737913	0.140475714	0.120276595	0.163609205	0.135423245	0.119970121	0.121903031	0.122074113	0.113455241	0.130920159	0.159135247	0.188037741	0.139339591	0.151285777	0.144703351	0.15059924	0.545004714	0.13753433	0.167430303	0.194029935	0.127240229
622	0.116874969	0.117278924	0.115641084	0.116648853	0.144999696	0.12609045	0.115653005	0.119791194	0.129530062	0.117284521	0.116549264	0.119239472	0.116305016	0.117071631	0.115602877	0.135641642	0.1193968	0.140553189	0.128428568	0.11562915	0.152977093	0.124665622	0.148217391	0.119900241	0.136772624	0.119159542	0.176435435	0.163618898	0.172145941	0.143529811	0.122770132	0.167757112	0.138308133	0.122457191	0.124431204	0.124606276	0.115806961	0.133671835	0.163024659	0.19408179	0.142353889	0.154779746	0.147916289	0.154062188	0.489897158	0.140487247	0.171818344	0.200679917	0.129894318
623	0.119251778	0.119699114	0.118018876	0.119023923	0.14782358	0.128705212	0.11802987	0.122264165	0.132070446	0.119704262	0.118952688	0.121639143	0.118702836	0.119487362	0.117979643	0.138520933	0.121861243	0.143595534	0.131102505	0.118008293	0.156530229	0.127246835	0.151557147	0.122375407	0.139687942	0.121558583	0.181429356	0.167739295	0.176822243	0.146681424	0.125307798	0.172135743	0.141273513	0.124987818	0.127006584	0.127186007	0.118191117	0.136491208	0.167109637	0.200677219	0.145461621	0.158419899	0.151243568	0.157667685	0.436107444	0.143527391	0.176471704	0.20800457	0.132607029
624	0.121663439	0.122156971	0.120431091	0.121433674	0.150712913	0.131374765	0.120441109	0.124779312	0.134657387	0.122161629	0.121392413	0.124075603	0.121136515	0.121940392	0.120390764	0.141479816	0.124367119	0.146733742	0.13383664	0.120421936	0.160235886	0.129879823	0.155024684	0.124892939	0.142686384	0.123994348	0.186782228	0.172085475	0.18180633	0.149940289	0.127893343	0.176777048	0.144326974	0.127565699	0.129633209	0.129817379	0.120610118	0.139384397	0.171415502	0.207932671	0.148671991	0.162223108	0.154697238	0.161432027	0.383611845	0.146663176	0.181429283	0.216147686	0.135383519
625	0.124112275	0.124655554	0.122880305	0.123880438	0.153672246	0.134103837	0.122889277	0.127340155	0.137293888	0.124659675	0.123871329	0.126551191	0.123608886	0.124433736	0.122838802	0.144525727	0.126917874	0.149977274	0.136636249	0.122872681	0.164111865	0.132569022	0.158633943	0.127456375	0.14577581	0.126469181	0.192553311	0.176688276	0.187145925	0.153317397	0.130530829	0.181719199	0.147476986	0.130194832	0.132315459	0.132504812	0.123066631	0.142358164	0.175972153	0.215986946	0.151995363	0.166208907	0.158291034	0.165374049	0.33259098	0.149904036	0.186738026	0.225296047	0.138229441
626	0.126600904	0.127198177	0.12536935	0.126366834	0.156706572	0.13689759	0.125377189	0.129950498	0.139983282	0.127201708	0.12639258	0.129068554	0.126123035	0.126970668	0.125326579	0.147666954	0.129517234	0.1533368	0.139507124	0.125363387	0.168178836	0.13531926	0.162400928	0.130069539	0.148965004	0.12898573	0.198815757	0.181584481	0.192899252	0.156825227	0.133224661	0.187008223	0.150733049	0.132879559	0.135058106	0.135253121	0.12556358	0.145420011	0.180815199	0.225019945	0.15544347	0.17040008	0.162040711	0.169515684	0.28358282	0.153260607	0.192455163	0.235696111	0.141151018
627	0.129132213	0.129788428	0.127901317	0.128895755	0.159821369	0.139761688	0.127907917	0.132614467	0.142729234	0.129791304	0.12895957	0.131630627	0.128682302	0.129554727	0.12785717	0.150912785	0.132169234	0.156824416	0.142455648	0.127897171	0.172460966	0.138135817	0.166344125	0.132736576	0.152263839	0.131546933	0.205660888	0.186818345	0.199138088	0.160478027	0.135979641	0.192700153	0.154105876	0.135624605	0.13786636	0.138067567	0.12810414	0.148578312	0.18598741	0.235268337	0.15902967	0.174823394	0.165964457	0.173882649	0.23761033	0.156744945	0.198651174	0.247678322	0.144155132
628	0.131709362	0.132430187	0.130479557	0.131470362	0.163022643	0.142702361	0.130484795	0.135336541	0.145535753	0.132432336	0.131575982	0.134240627	0.131290304	0.132189742	0.130433916	0.154273678	0.134878255	0.160453905	0.145488887	0.130477408	0.17698671	0.141024488	0.170485022	0.135461992	0.155683459	0.134156008	0.213204043	0.192443593	0.205951871	0.164292159	0.138801012	0.198863867	0.157607608	0.138435126	0.140745937	0.140953927	0.130691755	0.151842446	0.191540617	0.247048295	0.162769259	0.179510519	0.170083393	0.178505317	0.196154019	0.160370786	0.205413797	0.261693049	0.147249428
629	0.134335788	0.135127662	0.133107702	0.134094091	0.166316994	0.1457265	0.133111434	0.138121599	0.148407218	0.135129002	0.134245804	0.136902063	0.13395096	0.134879866	0.133060432	0.157761472	0.137649066	0.164241067	0.148614696	0.133107758	0.181789829	0.143991655	0.174848765	0.138250693	0.159236517	0.136816465	0.221592752	0.198526081	0.213453347	0.168286524	0.141694529	0.205584942	0.16125208	0.141316779	0.143703131	0.143918559	0.133330152	0.15522298	0.197538229	0.260789094	0.166679853	0.184499235	0.174422222	0.183419839	0.160793681	0.164153872	0.212853514	0.27836445	0.150442434
630	0.137015221	0.137885428	0.135789685	0.136770672	0.169711691	0.148841752	0.135791748	0.140974978	0.15134841	0.137885866	0.136973366	0.139618752	0.136668515	0.137629609	0.135740637	0.161389634	0.140486873	0.168204117	0.151841849	0.135792183	0.1869107	0.147044382	0.179464996	0.141108046	0.162937451	0.139532119	0.231018273	0.205147376	0.221786423	0.172483101	0.144666526	0.212970916	0.165055147	0.144275784	0.146744901	0.1469685	0.13602337	0.158731873	0.204058625	0.27708319	0.170781866	0.189834979	0.179010033	0.188669602	0.132542278	0.168112352	0.221111179	0.298571459	0.153743712
631	0.139751712	0.140708471	0.138529774	0.139504155	0.17321475	0.152056647	0.138529983	0.143902531	0.154364552	0.140707901	0.139763377	0.142394842	0.13944759	0.140443886	0.138478784	0.165173573	0.143397386	0.172364189	0.155180189	0.138534984	0.192398023	0.150190517	0.184368917	0.144039942	0.166802833	0.14230712	0.241732105	0.212409624	0.231137218	0.176907614	0.147724009	0.221158564	0.169035085	0.147319015	0.149878972	0.150111567	0.138775793	0.162382734	0.211199739	0.296761215	0.175099108	0.195572895	0.183881339	0.194307134	0.111346699	0.172267277	0.230368738	0.323568491	0.157164034
632	0.142549661	0.143602246	0.141332613	0.142298938	0.176835042	0.15538074	0.141330755	0.146910708	0.157461363	0.143600548	0.142620976	0.145234845	0.14229322	0.14332807	0.141279496	0.16913102	0.146386884	0.176745962	0.158640816	0.14134084	0.198311081	0.153438818	0.189602669	0.147052871	0.170851797	0.145145979	0.254069935	0.220442257	0.24174983	0.181590391	0.150874755	0.230324104	0.173213089	0.150454098	0.153113964	0.153356483	0.141592196	0.166191135	0.219085375	0.321003429	0.179659545	0.201780544	0.189077423	0.200396626	0.096235013	0.176643224	0.240864504	0.355158637	0.160715591
633	0.14541386	0.146572741	0.144203263	0.145159811	0.180582409	0.158824786	0.144199099	0.150006641	0.160645114	0.146569778	0.145551792	0.148143682	0.145210918	0.146288055	0.144147815	0.173282501	0.149462305	0.181378456	0.16223631	0.144214854	0.204722736	0.156799107	0.195217138	0.150154013	0.175106572	0.148053616	0.268486717	0.229411358	0.253949118	0.186567448	0.154127441	0.240697687	0.177613903	0.15368953	0.156459531	0.156713027	0.14447779	0.170174993	0.227873989	0.351499717	0.184496259	0.208541548	0.194648075	0.207017313	0.085883624	0.181269089	0.252915199	0.395914918	0.164412261
634	0.148349541	0.149626554	0.147147263	0.148092003	0.184467807	0.162400952	0.14714052	0.153198249	0.163922705	0.14962217	0.148562008	0.151126725	0.148206732	0.149330332	0.147089254	0.177651931	0.152631346	0.186296043	0.165980999	0.147162613	0.211723469	0.160282449	0.201274323	0.153351344	0.179593155	0.151035404	0.285608434	0.239532879	0.268173942	0.191881906	0.157491785	0.252584221	0.182266614	0.157034824	0.159926543	0.160192214	0.147438281	0.174355052	0.237771063	0.390656475	0.18964869	0.215960528	0.200653894	0.214268041	0.079061808	0.18617909	0.266948088	0.449361646	0.168269923
635	0.151362428	0.152770987	0.150170692	0.151101238	0.188503466	0.16612307	0.150161059	0.156494369	0.167301743	0.152765003	0.151658447	0.154189861	0.15128733	0.152462078	0.150109867	0.18226736	0.155902578	0.191539755	0.169891296	0.150190248	0.219426895	0.163901369	0.207850504	0.156653763	0.184342158	0.154097228	0.306308479	0.251091558	0.28502607	0.197585827	0.160978729	0.266393641	0.187205655	0.160500676	0.163527295	0.163806511	0.150479942	0.178755482	0.249046768	0.44177998	0.195164241	0.224169909	0.20716935	0.222273531	0.074794497	0.191414066	0.283548227	0.519729576	0.172306847
636	0.154458811	0.156014147	0.153280248	0.1541938	0.192703087	0.170006947	0.153267372	0.159904897	0.170790647	0.156006358	0.154848664	0.157339557	0.154460088	0.155691255	0.153216318	0.187161918	0.159285592	0.197158972	0.173986106	0.15330452	0.22797733	0.167670121	0.215040493	0.160071243	0.189389893	0.157245556	0.331817981	0.264468183	0.305341776	0.203742633	0.164600645	0.282685064	0.19247211	0.164099171	0.167275768	0.167570101	0.153609695	0.183404627	0.262061351	0.508920382	0.201100382	0.233339343	0.214286883	0.231193035	0.072361944	0.197023152	0.303527645	0.610091206	0.176544185
637	0.157645617	0.159365079	0.156483334	0.157376617	0.197082073	0.174070755	0.156466811	0.163440971	0.174398758	0.15935525	0.158141055	0.160582942	0.157733196	0.15902674	0.156415975	0.192375032	0.162791165	0.203213644	0.178287335	0.156512904	0.237560375	0.17160501	0.222963434	0.163615011	0.194779771	0.160487515	0.363877251	0.280179328	0.330295402	0.210430325	0.168371598	0.302231495	0.198115394	0.16784403	0.171187938	0.171499205	0.156835203	0.188335963	0.277302097	0.595371591	0.207527435	0.243688987	0.222122501	0.241232492	0.071246779	0.20306599	0.328025612	0.716581736	0.181006574
638	0.160930508	0.162833915	0.15978817	0.160657347	0.201657796	0.178335496	0.159767537	0.167115186	0.178136481	0.162821775	0.161545001	0.163927898	0.16111579	0.162478468	0.159717015	0.197954	0.166431466	0.209777237	0.182820529	0.159823703	0.248417842	0.175724794	0.231770796	0.167297766	0.200564116	0.163830988	0.4049116	0.298935263	0.361541047	0.217745827	0.17230766	0.326113138	0.20419546	0.171750917	0.175282167	0.175612481	0.160164984	0.193589326	0.295437162	0.698749083	0.214532297	0.255508402	0.230823475	0.25266177	0.071078832	0.209615642	0.358646707	0.819709201	0.185722903
639	0.164321985	0.166432056	0.163203912	0.164044492	0.206449929	0.182825598	0.163178638	0.170941853	0.182015444	0.166417291	0.165071013	0.167383175	0.164618099	0.166057608	0.163128546	0.20395603	0.1702203	0.216940649	0.187615671	0.163246173	0.260868926	0.180051173	0.241657468	0.171133944	0.206806545	0.167284726	0.458123899	0.321722973	0.401377895	0.225810846	0.176427293	0.355845343	0.210785711	0.175837805	0.179579678	0.179931506	0.163608549	0.19921249	0.317392978	0.802643358	0.222223452	0.269183532	0.240578998	0.265839225	0.071592579	0.21676249	0.397625216	0.888013653	0.190727279
640	0.167829518	0.170172389	0.166740809	0.167547521	0.211480827	0.187569655	0.166710283	0.174937318	0.18604869	0.170154634	0.168730933	0.170958519	0.16825163	0.169776773	0.166660758	0.210450945	0.174173411	0.224817545	0.192708202	0.166790677	0.275340689	0.184609409	0.252877416	0.175140039	0.21358513	0.170858475	0.527114214	0.349921503	0.452847993	0.234779977	0.180751832	0.393533793	0.217976899	0.180125435	0.184105151	0.184481393	0.167176558	0.205263229	0.344462749	0.87700143	0.230737849	0.285235743	0.251635224	0.281247174	0.072596788	0.224619513	0.447935764	0.905420055	0.196060268
641	0.171463698	0.174069554	0.170410374	0.171177026	0.216775991	0.192601362	0.17037389	0.179120347	0.190250901	0.174048382	0.172538158	0.174664827	0.172029385	0.173650279	0.170325097	0.217524768	0.178308841	0.233551608	0.198140322	0.170468868	0.292411795	0.189429101	0.265765873	0.179334995	0.220996618	0.174563134	0.613953491	0.385444728	0.519424899	0.244851919	0.185306073	0.441987163	0.22588238	0.184637884	0.188887469	0.189291557	0.170881013	0.211812034	0.378444501	0.902039637	0.240250354	0.304377802	0.264316542	0.299542811	0.07395352	0.233329485	0.513041603	0.884550037	0.201770494
642	0.175236415	0.17814026	0.174225604	0.174944903	0.22236462	0.197960709	0.174182341	0.183512611	0.194638675	0.178115174	0.176507918	0.178514333	0.175966122	0.177694447	0.174134478	0.225284541	0.182647388	0.243326571	0.203962669	0.174293902	0.312874901	0.194545158	0.280770988	0.183740699	0.229162147	0.178410939	0.714008343	0.43086272	0.603353051	0.256285197	0.190119022	0.504526945	0.234645282	0.189403276	0.193960659	0.194396682	0.174735486	0.218945713	0.421772584	0.886335901	0.250986946	0.32759291	0.279055908	0.321630457	0.075563428	0.243074916	0.595410717	0.843028464	0.207916716
643	0.179161079	0.182403683	0.178201233	0.178864568	0.228280282	0.203695518	0.178150235	0.188139278	0.199230847	0.182374094	0.180657613	0.182520825	0.180078681	0.181927987	0.178103542	0.233864866	0.187213158	0.254380176	0.210236512	0.178280708	0.337823228	0.199999053	0.298498967	0.188382579	0.238235042	0.182415682	0.809143103	0.489306502	0.701036705	0.269420371	0.195224832	0.583743338	0.24444837	0.194454677	0.199365093	0.199837959	0.178755399	0.226772231	0.477487569	0.847730798	0.263243244	0.35624067	0.296438105	0.348760008	0.077355282	0.254091885	0.692218217	0.79084555	0.214570564
644	0.183252872	0.186881946	0.182354044	0.182951214	0.234561711	0.209863428	0.182294194	0.19302976	0.20404888	0.18684716	0.185007225	0.186699909	0.184386368	0.186372462	0.182248957	0.243436863	0.192034265	0.267023788	0.217036624	0.182446304	0.368761847	0.205840428	0.319777577	0.193290366	0.248411576	0.186592977	0.872129538	0.563574957	0.796401371	0.284711504	0.200663996	0.677751386	0.255527766	0.199831232	0.205149029	0.205664674	0.182958359	0.235427266	0.548562805	0.797169391	0.2774107	0.39218032	0.317260716	0.382647001	0.079278398	0.266689471	0.788651728	0.734023605	0.221820156
645	0.187529067	0.19160072	0.186703253	0.18722213	0.241253765	0.216534492	0.186633238	0.198218645	0.209117335	0.191559908	0.189579828	0.191069328	0.188911438	0.191052856	0.186589804	0.254220522	0.1971437	0.281669957	0.224455093	0.186810186	0.40772141	0.212129168	0.345741807	0.198499043	0.259945878	0.190960573	0.88908961	0.653210782	0.863309851	0.302770482	0.206484879	0.77390227	0.268192089	0.205579618	0.211370603	0.211936263	0.187364571	0.245083145	0.635479551	0.741092672	0.294013516	0.437851084	0.342616859	0.425572351	0.081297121	0.281277057	0.858916971	0.675534322	0.229774932
646	0.192009403	0.196589965	0.191270967	0.191697081	0.248408585	0.223794596	0.191189238	0.203746888	0.214464442	0.196542137	0.194402209	0.195649342	0.193679689	0.195998299	0.191148025	0.266501879	0.202580437	0.298871138	0.232606409	0.191394803	0.457280088	0.218938121	0.377938195	0.204050051	0.273170763	0.195538743	0.86990587	0.748873553	0.88548305	0.324428389	0.212745692	0.847959741	0.282849303	0.211755914	0.218100423	0.218724999	0.191997345	0.255961166	0.731035418	0.68293486	0.313760218	0.496104606	0.373997613	0.480308435	0.08338674	0.298402692	0.884994451	0.616699384	0.238572179
647	0.196716552	0.201884872	0.196082764	0.196398771	0.256086977	0.231750014	0.195987481	0.20966333	0.220122794	0.201828835	0.199505663	0.200463199	0.198721197	0.201242951	0.195948998	0.280657022	0.20839084	0.319373395	0.241634353	0.19622615	0.520198772	0.226356686	0.418416431	0.209992843	0.288526905	0.200350749	0.830406246	0.829112562	0.870186694	0.350816685	0.219517068	0.880032293	0.300044319	0.21842804	0.225425002	0.226119539	0.196883717	0.268348702	0.815851316	0.624206927	0.337613643	0.569230273	0.413387818	0.549429518	0.085530493	0.318806325	0.872341915	0.558264116	0.248385914
648	0.201676679	0.207527044	0.201168399	0.201353413	0.264360056	0.240533518	0.201057366	0.216026651	0.22613019	0.207461352	0.204926969	0.205537699	0.204071243	0.206827145	0.201022233	0.297185503	0.214630468	0.344187798	0.251721342	0.201334494	0.597941253	0.234495575	0.469688776	0.216386865	0.306603347	0.205423414	0.779975534	0.871682344	0.833005514	0.383461514	0.226885448	0.872269427	0.320510718	0.225678953	0.233451296	0.234229629	0.202055232	0.282622976	0.8663516	0.565737033	0.3668784	0.656098439	0.463250962	0.633052071	0.087717389	0.34349067	0.836622947	0.500586822	0.259439066
649	0.206920148	0.213566004	0.206562687	0.206591437	0.273311179	0.250312609	0.20643327	0.222907903	0.232530671	0.213488893	0.210709636	0.210903899	0.209771478	0.212798813	0.206402249	0.316756134	0.221366412	0.374675887	0.263101222	0.206755284	0.687021466	0.243493201	0.5342147	0.223304147	0.328192366	0.210787824	0.724361489	0.87293431	0.783961575	0.424353068	0.23495755	0.839513228	0.345238797	0.233610859	0.242312781	0.243192412	0.207548918	0.299283936	0.874667193	0.507947955	0.403287392	0.747099204	0.526097117	0.724208529	0.089940608	0.373806396	0.788367385	0.443875206	0.272020223
650	0.212482382	0.220061131	0.212306622	0.212148358	0.283038186	0.261300762	0.212155639	0.230393836	0.239375784	0.219970429	0.216905488	0.216597975	0.2158714	0.219215332	0.212129666	0.34026765	0.228680345	0.412623238	0.276076874	0.212530303	0.774165134	0.253524316	0.612642491	0.23083269	0.354359736	0.216480193	0.666692374	0.845682243	0.729079972	0.47585936	0.243866367	0.793048865	0.37555595	0.242350846	0.25217766	0.253180951	0.213408509	0.318999149	0.851723909	0.451071509	0.449014154	0.822177301	0.602921429	0.805196165	0.092196354	0.4115266	0.733848468	0.388369044	0.286506785
651	0.218404939	0.22708413	0.218448762	0.218065855	0.293655884	0.273772594	0.218272345	0.238591224	0.246726125	0.226977149	0.223576675	0.222662283	0.222430231	0.226145874	0.218252583	0.368920776	0.23667249	0.460209461	0.291044118	0.218709099	0.837948664	0.264811611	0.700057874	0.239080883	0.386520553	0.222542931	0.608394419	0.802487921	0.671782516	0.540141299	0.253779116	0.739496934	0.413192117	0.25205835	0.263259869	0.264415682	0.219685995	0.342661756	0.810945807	0.395347404	0.506398115	0.861567007	0.689696594	0.854608743	0.094483035	0.458821582	0.676698654	0.334489849	0.303396306
652	0.224736854	0.234722275	0.225047011	0.224393133	0.305298725	0.288084667	0.224840429	0.247632646	0.254653237	0.234595655	0.230798278	0.229146691	0.229519344	0.233674469	0.224828324	0.404284419	0.24546689	0.519627268	0.308524315	0.225350824	0.863238337	0.277641587	0.782008966	0.24818341	0.426484103	0.229025978	0.550263974	0.750713943	0.613655703	0.617374151	0.264908052	0.682834242	0.460244752	0.26293528	0.275834122	0.277180066	0.226443601	0.371459061	0.760442051	0.341176638	0.576884523	0.862156618	0.773159801	0.864295712	0.096800678	0.517892711	0.618614474	0.28301329	0.323348688
653	0.231536339	0.243082642	0.232170894	0.231188638	0.318123372	0.304703619	0.231928318	0.25768419	0.26324193	0.242932153	0.238661707	0.236110243	0.237225399	0.241904023	0.231925684	0.448289502	0.255218429	0.591790071	0.329207422	0.232526592	0.853264847	0.292386097	0.838118586	0.258309122	0.476347883	0.235988474	0.492737706	0.694917648	0.555568833	0.702141329	0.277525087	0.624990361	0.518800491	0.275239702	0.290256317	0.291841838	0.233756335	0.406930986	0.705220646	0.289292348	0.658385739	0.835576138	0.833070561	0.843458761	0.099150522	0.589714523	0.560507712	0.235190776	0.347239867
654	0.238872921	0.252297667	0.239904469	0.238522215	0.332310602	0.324243096	0.239618661	0.268955728	0.272593091	0.252117934	0.247279098	0.243623238	0.24565442	0.250961554	0.239627791	0.502962985	0.266122163	0.67342668	0.354004789	0.240322498	0.820603379	0.309531073	0.856741714	0.269671543	0.537932735	0.24350085	0.436086802	0.63748765	0.49800768	0.780178844	0.291981435	0.566964314	0.58968396	0.289304221	0.306990812	0.308881363	0.241715261	0.450948011	0.648026211	0.240892385	0.741354946	0.793324897	0.856064463	0.804486816	0.101534749	0.671176658	0.502892111	0.192669296	0.376221179
655	0.246830122	0.262532396	0.248350046	0.246477823	0.348065529	0.34750917	0.248011957	0.281714491	0.282827006	0.262316532	0.256789034	0.251769815	0.254937061	0.261005033	0.248035767	0.569503497	0.278425636	0.753528166	0.384103025	0.248843479	0.775092672	0.329713368	0.842901143	0.282542754	0.611209169	0.251647422	0.380621764	0.579597901	0.441266052	0.832570648	0.308733434	0.509329056	0.66975251	0.305560195	0.326645544	0.328928035	0.250431705	0.505428672	0.590187583	0.197595346	0.808299971	0.742474358	0.845421672	0.755420259	0.103956303	0.75150645	0.446070369	0.157047939	0.411760599
656	0.255508899	0.273994152	0.257633049	0.255157025	0.365614373	0.375549926	0.257231277	0.296303255	0.294087304	0.273733255	0.26736411	0.260651232	0.26523557	0.272232483	0.257273502	0.646097325	0.292445386	0.814324945	0.420990504	0.258218373	0.722663935	0.353765618	0.80854701	0.297271981	0.691270612	0.260529693	0.326856036	0.521928363	0.385657798	0.849069679	0.328376121	0.452420944	0.748483651	0.324569415	0.350015358	0.352804756	0.260042767	0.571402575	0.532458594	0.161045501	0.843068373	0.68742153	0.812979251	0.70121528	0.106418781	0.813025739	0.390348828	0.12915516	0.455597203
657	0.265031998	0.286945195	0.267908284	0.264683405	0.38519451	0.409687299	0.267428353	0.313163917	0.306545377	0.28662767	0.279220814	0.270389951	0.276752863	0.284893895	0.267493814	0.724652768	0.308588426	0.842048366	0.466369038	0.268606446	0.666978425	0.38276076	0.762389875	0.314309675	0.76557649	0.27027046	0.275672467	0.464875165	0.331682664	0.834766965	0.351683313	0.396551365	0.808865051	0.347062516	0.378126685	0.381572536	0.270718465	0.646856898	0.475277726	0.132195354	0.84328615	0.630551328	0.767915822	0.644716832	0.108926376	0.841690379	0.336205765	0.10862821	0.509426274
658	0.275549439	0.301719137	0.27936801	0.275208152	0.407032696	0.451469058	0.27879141	0.332866876	0.320404981	0.301329777	0.292632351	0.281134707	0.289744296	0.299306687	0.278886379	0.790097631	0.327379306	0.836932985	0.521741614	0.280205823	0.609928522	0.418029095	0.709907711	0.334237403	0.8173188	0.281018919	0.228423696	0.408755739	0.280193278	0.800628742	0.379647206	0.342183256	0.837359213	0.373978807	0.412260716	0.41654924	0.282670971	0.72370401	0.418964031	0.110824946	0.818207491	0.573078156	0.716004001	0.587355446	0.11148386	0.837347911	0.284458423	0.094236037	0.573942917
659	0.287245294	0.318741339	0.292252099	0.286916965	0.431304866	0.50240111	0.291555015	0.356143887	0.335906288	0.318260114	0.307944742	0.29306661	0.304532476	0.31587498	0.291687699	0.827319905	0.349491253	0.808851378	0.587326303	0.29326409	0.552515389	0.46107918	0.654395602	0.357801013	0.836174898	0.292956811	0.186804611	0.353997476	0.232506293	0.754997201	0.413495178	0.290096496	0.833505285	0.40648931	0.453895754	0.459236269	0.296166231	0.787301883	0.363913869	0.095765369	0.777917056	0.515705251	0.660762856	0.529934473	0.114096608	0.809755134	0.236383812	0.08451523	0.646862941
660	0.300346219	0.338553897	0.306861071	0.300038785	0.458066048	0.563162831	0.306012713	0.383918117	0.353328082	0.337954409	0.325597119	0.306406587	0.321526054	0.335113442	0.306193914	0.832038075	0.375777288	0.76697009	0.659911927	0.308091923	0.495347264	0.513258373	0.597588502	0.385940153	0.825224196	0.306305943	0.152340465	0.301309717	0.190305419	0.703056562	0.454626239	0.2415244	0.806587176	0.445955752	0.504425036	0.510994381	0.311538876	0.823274582	0.310774589	0.085552867	0.728905878	0.458869427	0.604069804	0.472947309	0.116770639	0.768163827	0.193647618	0.078202391	0.720251083
661	0.315131469	0.361841315	0.323571618	0.314856075	0.487141962	0.631932121	0.322532077	0.417305401	0.372984761	0.361089013	0.346144434	0.321423672	0.341241158	0.357672454	0.322776066	0.811185741	0.407281618	0.717241878	0.730541762	0.325079287	0.43882072	0.574836541	0.540444157	0.419786413	0.794034001	0.321336561	0.125664396	0.251829725	0.155153139	0.648016538	0.504321367	0.198103611	0.765610126	0.493701321	0.56435946	0.572158649	0.329209789	0.827605046	0.260599451	0.07888772	0.675336242	0.402932752	0.546946157	0.416758302	0.119512694	0.718596948	0.157849774	0.074329376	0.78049465
662	0.331943648	0.389447457	0.342853263	0.33171592	0.517987808	0.702214881	0.34157093	0.457533691	0.39521351	0.388498	0.370277866	0.338443146	0.364321756	0.384356697	0.341896551	0.77421787	0.445190188	0.663420192	0.785513166	0.344712714	0.38332508	0.64331351	0.483540447	0.460573895	0.750773006	0.338375609	0.106228649	0.207130781	0.127795582	0.591599222	0.563009168	0.161483302	0.716565748	0.550396261	0.631782211	0.640382975	0.34970443	0.806942955	0.214893581	0.074763801	0.619601523	0.348375271	0.490002992	0.361803274	0.122330337	0.664857028	0.129830649	0.072195577	0.81450106
663	0.351199545	0.422362268	0.36528439	0.351041341	0.549525774	0.762225018	0.363693146	0.505656212	0.420341608	0.421161242	0.398833127	0.357853192	0.391551647	0.416119338	0.36412513	0.727679852	0.490622538	0.607666867	0.813414354	0.367591619	0.32943564	0.711333473	0.427289386	0.509330831	0.700579861	0.357813534	0.092701836	0.168913166	0.107770323	0.534764114	0.62876766	0.132608933	0.663222973	0.61473502	0.700239527	0.708542865	0.373668891	0.770329762	0.175376718	0.072451681	0.562988912	0.295973053	0.433664262	0.308772376	0.125232089	0.609142142	0.109224716	0.071303181	0.818544031
664	0.373395601	0.461620264	0.391556839	0.373337283	0.580047074	0.799545815	0.389573898	0.561849524	0.4486199	0.460107224	0.432754691	0.380104291	0.423832077	0.453981665	0.390144145	0.675808488	0.544084368	0.551152797	0.812533841	0.394431793	0.278074825	0.766980773	0.3721292	0.566137715	0.646750748	0.380103823	0.083627346	0.138333807	0.093787363	0.478111313	0.695449068	0.111247591	0.607800838	0.681578506	0.758441438	0.764870323	0.401869036	0.724206447	0.143360123	0.071432239	0.506258092	0.24693135	0.378356583	0.258757974	0.128227597	0.552641585	0.09478646	0.071298653	0.798562123
665	0.399100198	0.508015305	0.422451642	0.399183342	0.607276452	0.808750523	0.419978122	0.624140263	0.480105599	0.50613795	0.472961536	0.405693176	0.462080739	0.498794457	0.420726299	0.621236091	0.604398047	0.494584978	0.789571362	0.426036818	0.230614821	0.798940429	0.318709761	0.62880779	0.591195125	0.405747037	0.077783696	0.11541933	0.084377822	0.422078932	0.752346881	0.096210469	0.55151887	0.741090683	0.794562607	0.797900071	0.435148419	0.672703903	0.119096333	0.07133704	0.449913833	0.20287037	0.324697664	0.213295127	0.131327844	0.496070982	0.08504075	0.07192969	0.762948768
666	0.428912822	0.561445593	0.458741391	0.429192814	0.628710165	0.793637916	0.455670645	0.68684233	0.51447039	0.559193752	0.519991355	0.435111643	0.506948706	0.550670038	0.456642399	0.565435097	0.667160042	0.438456691	0.75232152	0.463188396	0.188755187	0.803588402	0.268056327	0.691341458	0.534971919	0.435239438	0.074249021	0.099141595	0.078294494	0.36714178	0.788276431	0.08602527	0.495111836	0.781792313	0.803502588	0.803627242	0.474284379	0.618439752	0.101711396	0.071902982	0.394396324	0.165462158	0.273664585	0.17409757	0.134545416	0.439927369	0.078715722	0.07301518	0.717816088
667	0.463362186	0.619851445	0.500958962	0.46390914	0.642152996	0.761830937	0.497201024	0.740436532	0.550757597	0.6173143	0.573320738	0.468736764	0.558254278	0.60801613	0.498440725	0.509251511	0.7240039	0.383228486	0.706390959	0.506390387	0.154040198	0.785574193	0.221636499	0.743989726	0.478738495	0.468962448	0.072359175	0.088025907	0.074590097	0.313995964	0.797968338	0.079382648	0.439089307	0.796819519	0.788783268	0.786429848	0.519666325	0.562885904	0.089760382	0.072942036	0.34027296	0.135764524	0.226677447	0.142446228	0.137894826	0.384669813	0.074839068	0.074425295	0.667176359
668	0.502676677	0.677996876	0.548900581	0.503570871	0.64628143	0.719508302	0.544436835	0.7749968	0.587132025	0.675418939	0.630264268	0.50660627	0.613994221	0.666295985	0.545969163	0.453268054	0.764794182	0.329531001	0.655458015	0.55532655	0.127130466	0.75210959	0.181165999	0.776967765	0.422996791	0.506955958	0.071641781	0.080715174	0.072579145	0.263721908	0.784374082	0.075280521	0.383932704	0.787606945	0.757514221	0.753506519	0.570643246	0.506909088	0.081843961	0.074318545	0.288423163	0.113665103	0.185445378	0.11853142	0.14139295	0.33092243	0.072705508	0.076066478	0.613614753
669	0.546407972	0.727573712	0.600892378	0.547724241	0.640859296	0.670878346	0.59586321	0.785421746	0.62083079	0.725336252	0.685130081	0.548081525	0.669401315	0.71778484	0.597660856	0.397971947	0.782573071	0.278325908	0.601862293	0.608080588	0.107506831	0.708991174	0.148062115	0.785667856	0.368257462	0.548577617	0.071762891	0.076136861	0.071776006	0.217829125	0.754274982	0.072987452	0.330274582	0.760521639	0.715805683	0.710734845	0.624655466	0.451093646	0.076832768	0.075935635	0.240148631	0.098047444	0.151457672	0.101437326	0.145059537	0.279636369	0.071814862	0.077872218	0.558628383
670	0.592863159	0.75999694	0.652963902	0.594637174	0.626592095	0.618706877	0.647758484	0.773649284	0.648507061	0.758466705	0.729825244	0.591386856	0.717011868	0.753769994	0.649703943	0.343955147	0.777205917	0.231005857	0.546975041	0.660316433	0.093852544	0.660089572	0.122753307	0.77247668	0.31524199	0.59203685	0.072483602	0.073504398	0.071835907	0.17803222	0.713616662	0.071983064	0.279080652	0.721813046	0.667779246	0.662047616	0.676507389	0.395946885	0.073892042	0.077723924	0.19711203	0.087433669	0.12527743	0.089717495	0.148917913	0.232193239	0.071812199	0.079795247	0.503104612
671	0.638629582	0.770531818	0.69880702	0.640810782	0.604753399	0.564688888	0.694061043	0.745606823	0.666996819	0.769877388	0.756763684	0.63329343	0.748908124	0.76855348	0.695935792	0.292092683	0.753755267	0.189273701	0.49162338	0.705387475	0.084684161	0.607897034	0.10450845	0.743450035	0.265038081	0.634075813	0.073632764	0.072258875	0.072513164	0.145681693	0.666444268	0.071899699	0.231741612	0.67588372	0.616100257	0.609980265	0.718923801	0.342078859	0.072426811	0.079634182	0.160938071	0.080477314	0.106292661	0.081960155	0.152995853	0.190292189	0.072444755	0.081802407	0.447654278
672	0.678629169	0.760449832	0.731344064	0.681045884	0.576783627	0.509840902	0.72775052	0.706929188	0.67426469	0.760596289	0.762641763	0.669296545	0.760441296	0.762265315	0.729291895	0.243673967	0.718161552	0.154668212	0.436409717	0.736180309	0.078770423	0.553979905	0.091903597	0.70411963	0.219158438	0.670152021	0.075087206	0.072003946	0.073631077	0.121099097	0.615404054	0.07247459	0.189964892	0.625596083	0.562467767	0.556132162	0.745022727	0.290387409	0.072015143	0.081631729	0.132525428	0.076152039	0.093120523	0.077060809	0.15732674	0.155485468	0.073530771	0.0838707	0.392822357
673	0.70739532	0.734600085	0.745848349	0.709780892	0.544034057	0.454852937	0.743852766	0.661448695	0.669926222	0.735361294	0.749460608	0.694754778	0.752255238	0.739256802	0.744866236	0.20034924	0.674711652	0.127843864	0.381900975	0.748368168	0.075190983	0.499318798	0.083509222	0.658215698	0.179314586	0.695596105	0.076758604	0.072455417	0.075062694	0.1034572	0.562276437	0.073518792	0.155273947	0.572897949	0.50794714	0.501504511	0.75164009	0.242181871	0.072354623	0.083692489	0.111578998	0.073703705	0.084312013	0.074203998	0.161951174	0.128457356	0.07493965	0.085984496	0.33926054
674	0.721005284	0.698070441	0.741753284	0.723087681	0.507684335	0.400297567	0.74139706	0.611801494	0.655003152	0.69927078	0.721957735	0.706419256	0.728504495	0.704698641	0.741829017	0.163759751	0.62635869	0.108296138	0.328794583	0.741967561	0.07327432	0.444571503	0.0781527	0.60830541	0.146867635	0.707158449	0.078584442	0.073411766	0.076717804	0.091316895	0.508151866	0.074897971	0.128364227	0.518998888	0.453231269	0.446763357	0.740111017	0.199120337	0.073231007	0.085800216	0.09688432	0.072591139	0.078657651	0.072800972	0.166918918	0.108732768	0.076578576	0.088133593	0.287897824
675	0.718620505	0.654542244	0.722119805	0.720223231	0.468721349	0.346826382	0.723149812	0.559787912	0.631290326	0.656052343	0.684686529	0.703587979	0.693886858	0.66251715	0.723064974	0.134872339	0.57512693	0.094688449	0.278103792	0.720424084	0.072540804	0.390323363	0.0749719	0.556137491	0.122168168	0.70416578	0.080520288	0.074728283	0.078531787	0.083251289	0.453742375	0.076515584	0.108732877	0.464668795	0.398906504	0.392493878	0.714540447	0.162835635	0.074490538	0.087944107	0.086944919	0.072430814	0.075264355	0.072433446	0.172291782	0.09498777	0.078381035	0.090311543	0.240072075
[truncated: 525 more rows]
[truncated: 92 more columns]
