# Supplementary material for: Causality Analysis and Cell Network Modeling of Spatial Calcium Signaling Patterns in Liver Lobules
Source: Front Physiol. 2018 Oct 4;9:1377. doi: 10.3389/fphys.2018.01377 (PMC6180170; doi:10.3389/fphys.2018.01377)
Supplement: Supplementary file 1 [file Data_Sheet_1.ZIP › Vadigepalli-Supplementary-Data-Code/Fig7D_data.txt]

Time (sec)	Cell 1	Cell 2	Cell 3	Cell 4	Cell 5	Cell 6	Cell 7	Cell 8	Cell 9	Cell 10	Cell 11	Cell 12	Cell 13	Cell 14	Cell 15	Cell 16	Cell 17	Cell 18	Cell 19	Cell 20	Cell 21	Cell 22	Cell 23	Cell 24	Cell 25	Cell 26	Cell 27	Cell 28	Cell 29	Cell 30	Cell 31	Cell 32	Cell 33	Cell 34	Cell 35	Cell 36	Cell 37	Cell 38	Cell 39	Cell 40	Cell 41	Cell 42	Cell 43	Cell 44	Cell 45	Cell 46	Cell 47	Cell 48	Cell 49
1	0.2	0.2	0.2	0.2	0.2	0.2	0.2	0.2	0.2	0.2	0.2	0.2	0.2	0.2	0.2	0.2	0.2	0.2	0.2	0.2	0.2	0.2	0.2	0.2	0.2	0.2	0.2	0.2	0.2	0.2	0.2	0.2	0.2	0.2	0.2	0.2	0.2	0.2	0.2	0.2	0.2	0.2	0.2	0.2	0.2	0.2	0.2	0.2	0.2
2	0.205161179	0.205161179	0.205161179	0.205161179	0.205161179	0.205161179	0.205161179	0.205161179	0.205161179	0.205161179	0.205161179	0.205161179	0.205161179	0.205161179	0.205161179	0.205161179	0.205161179	0.205161179	0.205161179	0.205161179	0.205161179	0.205161179	0.205161179	0.205161179	0.205161179	0.205161179	0.205161179	0.205161179	0.205161179	0.205161179	0.205161179	0.205161179	0.205161179	0.205161179	0.205161179	0.205161179	0.205161179	0.205161179	0.205161179	0.205161179	0.205161179	0.205161179	0.205161179	0.205161179	0.205161179	0.205161179	0.205161179	0.205161179	0.205161179
3	0.208696131	0.208696131	0.208696131	0.208696131	0.208696131	0.208696131	0.208696131	0.208696131	0.208696131	0.208696131	0.208696131	0.208696131	0.208696131	0.208696131	0.208696131	0.208696131	0.208696131	0.208696131	0.208696131	0.208696131	0.208696131	0.208696131	0.208696131	0.208696131	0.208696131	0.208696131	0.208696131	0.208696131	0.208696131	0.208696131	0.208696131	0.208696131	0.208696131	0.208696131	0.208696131	0.208696131	0.208696131	0.208696131	0.208696131	0.208696131	0.208696131	0.208696131	0.208696131	0.208696131	0.208696131	0.208696131	0.208696131	0.208696131	0.208696131
4	0.212180381	0.212180381	0.212180381	0.212180381	0.212180381	0.212180381	0.212180381	0.212180381	0.212180381	0.212180381	0.212180381	0.212180381	0.212180381	0.212180381	0.212180381	0.212180381	0.212180381	0.212180381	0.212180381	0.212180381	0.212180381	0.212180381	0.212180381	0.212180381	0.212180381	0.212180381	0.212180381	0.212180381	0.212180381	0.212180381	0.212180381	0.212180381	0.212180381	0.212180381	0.212180381	0.212180381	0.212180381	0.212180381	0.212180381	0.212180381	0.212180381	0.212180381	0.212180381	0.212180381	0.212180381	0.212180381	0.212180381	0.212180381	0.212180381
5	0.215685706	0.215685706	0.215685706	0.215685706	0.215685706	0.215685706	0.215685706	0.215685706	0.215685706	0.215685706	0.215685706	0.215685706	0.215685706	0.215685706	0.215685706	0.215685706	0.215685706	0.215685706	0.215685706	0.215685706	0.215685706	0.215685706	0.215685706	0.215685706	0.215685706	0.215685706	0.215685706	0.215685706	0.215685706	0.215685706	0.215685706	0.215685706	0.215685706	0.215685706	0.215685706	0.215685706	0.215685706	0.215685706	0.215685706	0.215685706	0.215685706	0.215685706	0.215685706	0.215685706	0.215685706	0.215685706	0.215685706	0.215685706	0.215685706
6	0.219222671	0.219222671	0.219222671	0.219222671	0.219222671	0.219222671	0.219222671	0.219222671	0.219222671	0.219222671	0.219222671	0.219222671	0.219222671	0.219222671	0.219222671	0.219222671	0.219222671	0.219222671	0.219222671	0.219222671	0.219222671	0.219222671	0.219222671	0.219222671	0.219222671	0.219222671	0.219222671	0.219222671	0.219222671	0.219222671	0.219222671	0.219222671	0.219222671	0.219222671	0.219222671	0.219222671	0.219222671	0.219222671	0.219222671	0.219222671	0.219222671	0.219222671	0.219222671	0.219222671	0.219222671	0.219222671	0.219222671	0.219222671	0.219222671
7	0.222790393	0.222790393	0.222790393	0.222790393	0.222790393	0.222790393	0.222790393	0.222790393	0.222790393	0.222790393	0.222790393	0.222790393	0.222790393	0.222790393	0.222790393	0.222790393	0.222790393	0.222790393	0.222790393	0.222790393	0.222790393	0.222790393	0.222790393	0.222790393	0.222790393	0.222790393	0.222790393	0.222790393	0.222790393	0.222790393	0.222790393	0.222790393	0.222790393	0.222790393	0.222790393	0.222790393	0.222790393	0.222790393	0.222790393	0.222790393	0.222790393	0.222790393	0.222790393	0.222790393	0.222790393	0.222790393	0.222790393	0.222790393	0.222790393
8	0.226392902	0.226392902	0.226392902	0.226392902	0.226392902	0.226392902	0.226392902	0.226392902	0.226392902	0.226392902	0.226392902	0.226392902	0.226392902	0.226392902	0.226392902	0.226392902	0.226392902	0.226392902	0.226392902	0.226392902	0.226392902	0.226392902	0.226392902	0.226392902	0.226392902	0.226392902	0.226392902	0.226392902	0.226392902	0.226392902	0.226392902	0.226392902	0.226392902	0.226392902	0.226392902	0.226392902	0.226392902	0.226392902	0.226392902	0.226392902	0.226392902	0.226392902	0.226392902	0.226392902	0.226392902	0.226392902	0.226392902	0.226392902	0.226392902
9	0.230028827	0.230028827	0.230028827	0.230028827	0.230028827	0.230028827	0.230028827	0.230028827	0.230028827	0.230028827	0.230028827	0.230028827	0.230028827	0.230028827	0.230028827	0.230028827	0.230028827	0.230028827	0.230028827	0.230028827	0.230028827	0.230028827	0.230028827	0.230028827	0.230028827	0.230028827	0.230028827	0.230028827	0.230028827	0.230028827	0.230028827	0.230028827	0.230028827	0.230028827	0.230028827	0.230028827	0.230028827	0.230028827	0.230028827	0.230028827	0.230028827	0.230028827	0.230028827	0.230028827	0.230028827	0.230028827	0.230028827	0.230028827	0.230028827
10	0.233697037	0.233697037	0.233697037	0.233697037	0.233697037	0.233697037	0.233697037	0.233697037	0.233697037	0.233697037	0.233697037	0.233697037	0.233697037	0.233697037	0.233697037	0.233697037	0.233697037	0.233697037	0.233697037	0.233697037	0.233697037	0.233697037	0.233697037	0.233697037	0.233697037	0.233697037	0.233697037	0.233697037	0.233697037	0.233697037	0.233697037	0.233697037	0.233697037	0.233697037	0.233697037	0.233697037	0.233697037	0.233697037	0.233697037	0.233697037	0.233697037	0.233697037	0.233697037	0.233697037	0.233697037	0.233697037	0.233697037	0.233697037	0.233697037
11	0.237395749	0.237395749	0.237395749	0.237395749	0.237395749	0.237395749	0.237395749	0.237395749	0.237395749	0.237395749	0.237395749	0.237395749	0.237395749	0.237395749	0.237395749	0.237395749	0.237395749	0.237395749	0.237395749	0.237395749	0.237395749	0.237395749	0.237395749	0.237395749	0.237395749	0.237395749	0.237395749	0.237395749	0.237395749	0.237395749	0.237395749	0.237395749	0.237395749	0.237395749	0.237395749	0.237395749	0.237395749	0.237395749	0.237395749	0.237395749	0.237395749	0.237395749	0.237395749	0.237395749	0.237395749	0.237395749	0.237395749	0.237395749	0.237395749
12	0.241121833	0.241121833	0.241121833	0.241121833	0.241121833	0.241121833	0.241121833	0.241121833	0.241121833	0.241121833	0.241121833	0.241121833	0.241121833	0.241121833	0.241121833	0.241121833	0.241121833	0.241121833	0.241121833	0.241121833	0.241121833	0.241121833	0.241121833	0.241121833	0.241121833	0.241121833	0.241121833	0.241121833	0.241121833	0.241121833	0.241121833	0.241121833	0.241121833	0.241121833	0.241121833	0.241121833	0.241121833	0.241121833	0.241121833	0.241121833	0.241121833	0.241121833	0.241121833	0.241121833	0.241121833	0.241121833	0.241121833	0.241121833	0.241121833
13	0.244872445	0.244872445	0.244872445	0.244872445	0.244872445	0.244872445	0.244872445	0.244872445	0.244872445	0.244872445	0.244872445	0.244872445	0.244872445	0.244872445	0.244872445	0.244872445	0.244872445	0.244872445	0.244872445	0.244872445	0.244872445	0.244872445	0.244872445	0.244872445	0.244872445	0.244872445	0.244872445	0.244872445	0.244872445	0.244872445	0.244872445	0.244872445	0.244872445	0.244872445	0.244872445	0.244872445	0.244872445	0.244872445	0.244872445	0.244872445	0.244872445	0.244872445	0.244872445	0.244872445	0.244872445	0.244872445	0.244872445	0.244872445	0.244872445
14	0.248644124	0.248644124	0.248644124	0.248644124	0.248644124	0.248644124	0.248644124	0.248644124	0.248644124	0.248644124	0.248644124	0.248644124	0.248644124	0.248644124	0.248644124	0.248644124	0.248644124	0.248644124	0.248644124	0.248644124	0.248644124	0.248644124	0.248644124	0.248644124	0.248644124	0.248644124	0.248644124	0.248644124	0.248644124	0.248644124	0.248644124	0.248644124	0.248644124	0.248644124	0.248644124	0.248644124	0.248644124	0.248644124	0.248644124	0.248644124	0.248644124	0.248644124	0.248644124	0.248644124	0.248644124	0.248644124	0.248644124	0.248644124	0.248644124
15	0.252432373	0.252432373	0.252432373	0.252432373	0.252432373	0.252432373	0.252432373	0.252432373	0.252432373	0.252432373	0.252432373	0.252432373	0.252432373	0.252432373	0.252432373	0.252432373	0.252432373	0.252432373	0.252432373	0.252432373	0.252432373	0.252432373	0.252432373	0.252432373	0.252432373	0.252432373	0.252432373	0.252432373	0.252432373	0.252432373	0.252432373	0.252432373	0.252432373	0.252432373	0.252432373	0.252432373	0.252432373	0.252432373	0.252432373	0.252432373	0.252432373	0.252432373	0.252432373	0.252432373	0.252432373	0.252432373	0.252432373	0.252432373	0.252432373
16	0.25623195	0.25623195	0.25623195	0.25623195	0.25623195	0.25623195	0.25623195	0.25623195	0.25623195	0.25623195	0.25623195	0.25623195	0.25623195	0.25623195	0.25623195	0.25623195	0.25623195	0.25623195	0.25623195	0.25623195	0.25623195	0.25623195	0.25623195	0.25623195	0.25623195	0.25623195	0.25623195	0.25623195	0.25623195	0.25623195	0.25623195	0.25623195	0.25623195	0.25623195	0.25623195	0.25623195	0.25623195	0.25623195	0.25623195	0.25623195	0.25623195	0.25623195	0.25623195	0.25623195	0.25623195	0.25623195	0.25623195	0.25623195	0.25623195
17	0.260037375	0.260037375	0.260037375	0.260037375	0.260037375	0.260037375	0.260037375	0.260037375	0.260037375	0.260037375	0.260037375	0.260037375	0.260037375	0.260037375	0.260037375	0.260037375	0.260037375	0.260037375	0.260037375	0.260037375	0.260037375	0.260037375	0.260037375	0.260037375	0.260037375	0.260037375	0.260037375	0.260037375	0.260037375	0.260037375	0.260037375	0.260037375	0.260037375	0.260037375	0.260037375	0.260037375	0.260037375	0.260037375	0.260037375	0.260037375	0.260037375	0.260037375	0.260037375	0.260037375	0.260037375	0.260037375	0.260037375	0.260037375	0.260037375
18	0.263842854	0.263842854	0.263842854	0.263842854	0.263842854	0.263842854	0.263842854	0.263842854	0.263842854	0.263842854	0.263842854	0.263842854	0.263842854	0.263842854	0.263842854	0.263842854	0.263842854	0.263842854	0.263842854	0.263842854	0.263842854	0.263842854	0.263842854	0.263842854	0.263842854	0.263842854	0.263842854	0.263842854	0.263842854	0.263842854	0.263842854	0.263842854	0.263842854	0.263842854	0.263842854	0.263842854	0.263842854	0.263842854	0.263842854	0.263842854	0.263842854	0.263842854	0.263842854	0.263842854	0.263842854	0.263842854	0.263842854	0.263842854	0.263842854
19	0.267641903	0.267641903	0.267641903	0.267641903	0.267641903	0.267641903	0.267641903	0.267641903	0.267641903	0.267641903	0.267641903	0.267641903	0.267641903	0.267641903	0.267641903	0.267641903	0.267641903	0.267641903	0.267641903	0.267641903	0.267641903	0.267641903	0.267641903	0.267641903	0.267641903	0.267641903	0.267641903	0.267641903	0.267641903	0.267641903	0.267641903	0.267641903	0.267641903	0.267641903	0.267641903	0.267641903	0.267641903	0.267641903	0.267641903	0.267641903	0.267641903	0.267641903	0.267641903	0.267641903	0.267641903	0.267641903	0.267641903	0.267641903	0.267641903
20	0.271427133	0.271427133	0.271427133	0.271427133	0.271427133	0.271427133	0.271427133	0.271427133	0.271427133	0.271427133	0.271427133	0.271427133	0.271427133	0.271427133	0.271427133	0.271427133	0.271427133	0.271427133	0.271427133	0.271427133	0.271427133	0.271427133	0.271427133	0.271427133	0.271427133	0.271427133	0.271427133	0.271427133	0.271427133	0.271427133	0.271427133	0.271427133	0.271427133	0.271427133	0.271427133	0.271427133	0.271427133	0.271427133	0.271427133	0.271427133	0.271427133	0.271427133	0.271427133	0.271427133	0.271427133	0.271427133	0.271427133	0.271427133	0.271427133
21	0.27519095	0.27519095	0.27519095	0.27519095	0.27519095	0.27519095	0.27519095	0.27519095	0.27519095	0.27519095	0.27519095	0.27519095	0.27519095	0.27519095	0.27519095	0.27519095	0.27519095	0.27519095	0.27519095	0.27519095	0.27519095	0.27519095	0.27519095	0.27519095	0.27519095	0.27519095	0.27519095	0.27519095	0.27519095	0.27519095	0.27519095	0.27519095	0.27519095	0.27519095	0.27519095	0.27519095	0.27519095	0.27519095	0.27519095	0.27519095	0.27519095	0.27519095	0.27519095	0.27519095	0.27519095	0.27519095	0.27519095	0.27519095	0.27519095
22	0.278924828	0.278924828	0.278924828	0.278924828	0.278924828	0.278924828	0.278924828	0.278924828	0.278924828	0.278924828	0.278924828	0.278924828	0.278924828	0.278924828	0.278924828	0.278924828	0.278924828	0.278924828	0.278924828	0.278924828	0.278924828	0.278924828	0.278924828	0.278924828	0.278924828	0.278924828	0.278924828	0.278924828	0.278924828	0.278924828	0.278924828	0.278924828	0.278924828	0.278924828	0.278924828	0.278924828	0.278924828	0.278924828	0.278924828	0.278924828	0.278924828	0.278924828	0.278924828	0.278924828	0.278924828	0.278924828	0.278924828	0.278924828	0.278924828
23	0.282619217	0.282619217	0.282619217	0.282619217	0.282619217	0.282619217	0.282619217	0.282619217	0.282619217	0.282619217	0.282619217	0.282619217	0.282619217	0.282619217	0.282619217	0.282619217	0.282619217	0.282619217	0.282619217	0.282619217	0.282619217	0.282619217	0.282619217	0.282619217	0.282619217	0.282619217	0.282619217	0.282619217	0.282619217	0.282619217	0.282619217	0.282619217	0.282619217	0.282619217	0.282619217	0.282619217	0.282619217	0.282619217	0.282619217	0.282619217	0.282619217	0.282619217	0.282619217	0.282619217	0.282619217	0.282619217	0.282619217	0.282619217	0.282619217
24	0.286265137	0.286265137	0.286265137	0.286265137	0.286265137	0.286265137	0.286265137	0.286265137	0.286265137	0.286265137	0.286265137	0.286265137	0.286265137	0.286265137	0.286265137	0.286265137	0.286265137	0.286265137	0.286265137	0.286265137	0.286265137	0.286265137	0.286265137	0.286265137	0.286265137	0.286265137	0.286265137	0.286265137	0.286265137	0.286265137	0.286265137	0.286265137	0.286265137	0.286265137	0.286265137	0.286265137	0.286265137	0.286265137	0.286265137	0.286265137	0.286265137	0.286265137	0.286265137	0.286265137	0.286265137	0.286265137	0.286265137	0.286265137	0.286265137
25	0.28985266	0.28985266	0.28985266	0.28985266	0.28985266	0.28985266	0.28985266	0.28985266	0.28985266	0.28985266	0.28985266	0.28985266	0.28985266	0.28985266	0.28985266	0.28985266	0.28985266	0.28985266	0.28985266	0.28985266	0.28985266	0.28985266	0.28985266	0.28985266	0.28985266	0.28985266	0.28985266	0.28985266	0.28985266	0.28985266	0.28985266	0.28985266	0.28985266	0.28985266	0.28985266	0.28985266	0.28985266	0.28985266	0.28985266	0.28985266	0.28985266	0.28985266	0.28985266	0.28985266	0.28985266	0.28985266	0.28985266	0.28985266	0.28985266
26	0.293370771	0.293370771	0.293370771	0.293370771	0.293370771	0.293370771	0.293370771	0.293370771	0.293370771	0.293370771	0.293370771	0.293370771	0.293370771	0.293370771	0.293370771	0.293370771	0.293370771	0.293370771	0.293370771	0.293370771	0.293370771	0.293370771	0.293370771	0.293370771	0.293370771	0.293370771	0.293370771	0.293370771	0.293370771	0.293370771	0.293370771	0.293370771	0.293370771	0.293370771	0.293370771	0.293370771	0.293370771	0.293370771	0.293370771	0.293370771	0.293370771	0.293370771	0.293370771	0.293370771	0.293370771	0.293370771	0.293370771	0.293370771	0.293370771
27	0.296810258	0.296810258	0.296810258	0.296810258	0.296810258	0.296810258	0.296810258	0.296810258	0.296810258	0.296810258	0.296810258	0.296810258	0.296810258	0.296810258	0.296810258	0.296810258	0.296810258	0.296810258	0.296810258	0.296810258	0.296810258	0.296810258	0.296810258	0.296810258	0.296810258	0.296810258	0.296810258	0.296810258	0.296810258	0.296810258	0.296810258	0.296810258	0.296810258	0.296810258	0.296810258	0.296810258	0.296810258	0.296810258	0.296810258	0.296810258	0.296810258	0.296810258	0.296810258	0.296810258	0.296810258	0.296810258	0.296810258	0.296810258	0.296810258
28	0.300160952	0.300160952	0.300160952	0.300160952	0.300160952	0.300160952	0.300160952	0.300160952	0.300160952	0.300160952	0.300160952	0.300160952	0.300160952	0.300160952	0.300160952	0.300160952	0.300160952	0.300160952	0.300160952	0.300160952	0.300160952	0.300160952	0.300160952	0.300160952	0.300160952	0.300160952	0.300160952	0.300160952	0.300160952	0.300160952	0.300160952	0.300160952	0.300160952	0.300160952	0.300160952	0.300160952	0.300160952	0.300160952	0.300160952	0.300160952	0.300160952	0.300160952	0.300160952	0.300160952	0.300160952	0.300160952	0.300160952	0.300160952	0.300160952
29	0.303411527	0.303411527	0.303411527	0.303411527	0.303411527	0.303411527	0.303411527	0.303411527	0.303411527	0.303411527	0.303411527	0.303411527	0.303411527	0.303411527	0.303411527	0.303411527	0.303411527	0.303411527	0.303411527	0.303411527	0.303411527	0.303411527	0.303411527	0.303411527	0.303411527	0.303411527	0.303411527	0.303411527	0.303411527	0.303411527	0.303411527	0.303411527	0.303411527	0.303411527	0.303411527	0.303411527	0.303411527	0.303411527	0.303411527	0.303411527	0.303411527	0.303411527	0.303411527	0.303411527	0.303411527	0.303411527	0.303411527	0.303411527	0.303411527
30	0.306552786	0.306552786	0.306552786	0.306552786	0.306552786	0.306552786	0.306552786	0.306552786	0.306552786	0.306552786	0.306552786	0.306552786	0.306552786	0.306552786	0.306552786	0.306552786	0.306552786	0.306552786	0.306552786	0.306552786	0.306552786	0.306552786	0.306552786	0.306552786	0.306552786	0.306552786	0.306552786	0.306552786	0.306552786	0.306552786	0.306552786	0.306552786	0.306552786	0.306552786	0.306552786	0.306552786	0.306552786	0.306552786	0.306552786	0.306552786	0.306552786	0.306552786	0.306552786	0.306552786	0.306552786	0.306552786	0.306552786	0.306552786	0.306552786
31	0.309574869	0.309574869	0.309574869	0.309574869	0.309574869	0.309574869	0.309574869	0.309574869	0.309574869	0.309574869	0.309574869	0.309574869	0.309574869	0.309574869	0.309574869	0.309574869	0.309574869	0.309574869	0.309574869	0.309574869	0.309574869	0.309574869	0.309574869	0.309574869	0.309574869	0.309574869	0.309574869	0.309574869	0.309574869	0.309574869	0.309574869	0.309574869	0.309574869	0.309574869	0.309574869	0.309574869	0.309574869	0.309574869	0.309574869	0.309574869	0.309574869	0.309574869	0.309574869	0.309574869	0.309574869	0.309574869	0.309574869	0.309574869	0.309574869
32	0.312467119	0.312467119	0.312467119	0.312467119	0.312467119	0.312467119	0.312467119	0.312467119	0.312467119	0.312467119	0.312467119	0.312467119	0.312467119	0.312467119	0.312467119	0.312467119	0.312467119	0.312467119	0.312467119	0.312467119	0.312467119	0.312467119	0.312467119	0.312467119	0.312467119	0.312467119	0.312467119	0.312467119	0.312467119	0.312467119	0.312467119	0.312467119	0.312467119	0.312467119	0.312467119	0.312467119	0.312467119	0.312467119	0.312467119	0.312467119	0.312467119	0.312467119	0.312467119	0.312467119	0.312467119	0.312467119	0.312467119	0.312467119	0.312467119
33	0.315221146	0.315221146	0.315221146	0.315221146	0.315221146	0.315221146	0.315221146	0.315221146	0.315221146	0.315221146	0.315221146	0.315221146	0.315221146	0.315221146	0.315221146	0.315221146	0.315221146	0.315221146	0.315221146	0.315221146	0.315221146	0.315221146	0.315221146	0.315221146	0.315221146	0.315221146	0.315221146	0.315221146	0.315221146	0.315221146	0.315221146	0.315221146	0.315221146	0.315221146	0.315221146	0.315221146	0.315221146	0.315221146	0.315221146	0.315221146	0.315221146	0.315221146	0.315221146	0.315221146	0.315221146	0.315221146	0.315221146	0.315221146	0.315221146
34	0.317828161	0.317828161	0.317828161	0.317828161	0.317828161	0.317828161	0.317828161	0.317828161	0.317828161	0.317828161	0.317828161	0.317828161	0.317828161	0.317828161	0.317828161	0.317828161	0.317828161	0.317828161	0.317828161	0.317828161	0.317828161	0.317828161	0.317828161	0.317828161	0.317828161	0.317828161	0.317828161	0.317828161	0.317828161	0.317828161	0.317828161	0.317828161	0.317828161	0.317828161	0.317828161	0.317828161	0.317828161	0.317828161	0.317828161	0.317828161	0.317828161	0.317828161	0.317828161	0.317828161	0.317828161	0.317828161	0.317828161	0.317828161	0.317828161
35	0.320278884	0.320278884	0.320278884	0.320278884	0.320278884	0.320278884	0.320278884	0.320278884	0.320278884	0.320278884	0.320278884	0.320278884	0.320278884	0.320278884	0.320278884	0.320278884	0.320278884	0.320278884	0.320278884	0.320278884	0.320278884	0.320278884	0.320278884	0.320278884	0.320278884	0.320278884	0.320278884	0.320278884	0.320278884	0.320278884	0.320278884	0.320278884	0.320278884	0.320278884	0.320278884	0.320278884	0.320278884	0.320278884	0.320278884	0.320278884	0.320278884	0.320278884	0.320278884	0.320278884	0.320278884	0.320278884	0.320278884	0.320278884	0.320278884
36	0.322567411	0.322567411	0.322567411	0.322567411	0.322567411	0.322567411	0.322567411	0.322567411	0.322567411	0.322567411	0.322567411	0.322567411	0.322567411	0.322567411	0.322567411	0.322567411	0.322567411	0.322567411	0.322567411	0.322567411	0.322567411	0.322567411	0.322567411	0.322567411	0.322567411	0.322567411	0.322567411	0.322567411	0.322567411	0.322567411	0.322567411	0.322567411	0.322567411	0.322567411	0.322567411	0.322567411	0.322567411	0.322567411	0.322567411	0.322567411	0.322567411	0.322567411	0.322567411	0.322567411	0.322567411	0.322567411	0.322567411	0.322567411	0.322567411
37	0.324687483	0.324687483	0.324687483	0.324687483	0.324687483	0.324687483	0.324687483	0.324687483	0.324687483	0.324687483	0.324687483	0.324687483	0.324687483	0.324687483	0.324687483	0.324687483	0.324687483	0.324687483	0.324687483	0.324687483	0.324687483	0.324687483	0.324687483	0.324687483	0.324687483	0.324687483	0.324687483	0.324687483	0.324687483	0.324687483	0.324687483	0.324687483	0.324687483	0.324687483	0.324687483	0.324687483	0.324687483	0.324687483	0.324687483	0.324687483	0.324687483	0.324687483	0.324687483	0.324687483	0.324687483	0.324687483	0.324687483	0.324687483	0.324687483
38	0.326632434	0.326632434	0.326632434	0.326632434	0.326632434	0.326632434	0.326632434	0.326632434	0.326632434	0.326632434	0.326632434	0.326632434	0.326632434	0.326632434	0.326632434	0.326632434	0.326632434	0.326632434	0.326632434	0.326632434	0.326632434	0.326632434	0.326632434	0.326632434	0.326632434	0.326632434	0.326632434	0.326632434	0.326632434	0.326632434	0.326632434	0.326632434	0.326632434	0.326632434	0.326632434	0.326632434	0.326632434	0.326632434	0.326632434	0.326632434	0.326632434	0.326632434	0.326632434	0.326632434	0.326632434	0.326632434	0.326632434	0.326632434	0.326632434
39	0.328403207	0.328403207	0.328403207	0.328403207	0.328403207	0.328403207	0.328403207	0.328403207	0.328403207	0.328403207	0.328403207	0.328403207	0.328403207	0.328403207	0.328403207	0.328403207	0.328403207	0.328403207	0.328403207	0.328403207	0.328403207	0.328403207	0.328403207	0.328403207	0.328403207	0.328403207	0.328403207	0.328403207	0.328403207	0.328403207	0.328403207	0.328403207	0.328403207	0.328403207	0.328403207	0.328403207	0.328403207	0.328403207	0.328403207	0.328403207	0.328403207	0.328403207	0.328403207	0.328403207	0.328403207	0.328403207	0.328403207	0.328403207	0.328403207
40	0.329996699	0.329996699	0.329996699	0.329996699	0.329996699	0.329996699	0.329996699	0.329996699	0.329996699	0.329996699	0.329996699	0.329996699	0.329996699	0.329996699	0.329996699	0.329996699	0.329996699	0.329996699	0.329996699	0.329996699	0.329996699	0.329996699	0.329996699	0.329996699	0.329996699	0.329996699	0.329996699	0.329996699	0.329996699	0.329996699	0.329996699	0.329996699	0.329996699	0.329996699	0.329996699	0.329996699	0.329996699	0.329996699	0.329996699	0.329996699	0.329996699	0.329996699	0.329996699	0.329996699	0.329996699	0.329996699	0.329996699	0.329996699	0.329996699
41	0.331409199	0.331409199	0.331409199	0.331409199	0.331409199	0.331409199	0.331409199	0.331409199	0.331409199	0.331409199	0.331409199	0.331409199	0.331409199	0.331409199	0.331409199	0.331409199	0.331409199	0.331409199	0.331409199	0.331409199	0.331409199	0.331409199	0.331409199	0.331409199	0.331409199	0.331409199	0.331409199	0.331409199	0.331409199	0.331409199	0.331409199	0.331409199	0.331409199	0.331409199	0.331409199	0.331409199	0.331409199	0.331409199	0.331409199	0.331409199	0.331409199	0.331409199	0.331409199	0.331409199	0.331409199	0.331409199	0.331409199	0.331409199	0.331409199
42	0.332639416	0.332639416	0.332639416	0.332639416	0.332639416	0.332639416	0.332639416	0.332639416	0.332639416	0.332639416	0.332639416	0.332639416	0.332639416	0.332639416	0.332639416	0.332639416	0.332639416	0.332639416	0.332639416	0.332639416	0.332639416	0.332639416	0.332639416	0.332639416	0.332639416	0.332639416	0.332639416	0.332639416	0.332639416	0.332639416	0.332639416	0.332639416	0.332639416	0.332639416	0.332639416	0.332639416	0.332639416	0.332639416	0.332639416	0.332639416	0.332639416	0.332639416	0.332639416	0.332639416	0.332639416	0.332639416	0.332639416	0.332639416	0.332639416
43	0.333687843	0.333687843	0.333687843	0.333687843	0.333687843	0.333687843	0.333687843	0.333687843	0.333687843	0.333687843	0.333687843	0.333687843	0.333687843	0.333687843	0.333687843	0.333687843	0.333687843	0.333687843	0.333687843	0.333687843	0.333687843	0.333687843	0.333687843	0.333687843	0.333687843	0.333687843	0.333687843	0.333687843	0.333687843	0.333687843	0.333687843	0.333687843	0.333687843	0.333687843	0.333687843	0.333687843	0.333687843	0.333687843	0.333687843	0.333687843	0.333687843	0.333687843	0.333687843	0.333687843	0.333687843	0.333687843	0.333687843	0.333687843	0.333687843
44	0.334565575	0.334565575	0.334565575	0.334565575	0.334565575	0.334565575	0.334565575	0.334565575	0.334565575	0.334565575	0.334565575	0.334565575	0.334565575	0.334565575	0.334565575	0.334565575	0.334565575	0.334565575	0.334565575	0.334565575	0.334565575	0.334565575	0.334565575	0.334565575	0.334565575	0.334565575	0.334565575	0.334565575	0.334565575	0.334565575	0.334565575	0.334565575	0.334565575	0.334565575	0.334565575	0.334565575	0.334565575	0.334565575	0.334565575	0.334565575	0.334565575	0.334565575	0.334565575	0.334565575	0.334565575	0.334565575	0.334565575	0.334565575	0.334565575
45	0.335271442	0.335271442	0.335271442	0.335271442	0.335271442	0.335271442	0.335271442	0.335271442	0.335271442	0.335271442	0.335271442	0.335271442	0.335271442	0.335271442	0.335271442	0.335271442	0.335271442	0.335271442	0.335271442	0.335271442	0.335271442	0.335271442	0.335271442	0.335271442	0.335271442	0.335271442	0.335271442	0.335271442	0.335271442	0.335271442	0.335271442	0.335271442	0.335271442	0.335271442	0.335271442	0.335271442	0.335271442	0.335271442	0.335271442	0.335271442	0.335271442	0.335271442	0.335271442	0.335271442	0.335271442	0.335271442	0.335271442	0.335271442	0.335271442
46	0.335810371	0.335810371	0.335810371	0.335810371	0.335810371	0.335810371	0.335810371	0.335810371	0.335810371	0.335810371	0.335810371	0.335810371	0.335810371	0.335810371	0.335810371	0.335810371	0.335810371	0.335810371	0.335810371	0.335810371	0.335810371	0.335810371	0.335810371	0.335810371	0.335810371	0.335810371	0.335810371	0.335810371	0.335810371	0.335810371	0.335810371	0.335810371	0.335810371	0.335810371	0.335810371	0.335810371	0.335810371	0.335810371	0.335810371	0.335810371	0.335810371	0.335810371	0.335810371	0.335810371	0.335810371	0.335810371	0.335810371	0.335810371	0.335810371
47	0.336188477	0.336188477	0.336188477	0.336188477	0.336188477	0.336188477	0.336188477	0.336188477	0.336188477	0.336188477	0.336188477	0.336188477	0.336188477	0.336188477	0.336188477	0.336188477	0.336188477	0.336188477	0.336188477	0.336188477	0.336188477	0.336188477	0.336188477	0.336188477	0.336188477	0.336188477	0.336188477	0.336188477	0.336188477	0.336188477	0.336188477	0.336188477	0.336188477	0.336188477	0.336188477	0.336188477	0.336188477	0.336188477	0.336188477	0.336188477	0.336188477	0.336188477	0.336188477	0.336188477	0.336188477	0.336188477	0.336188477	0.336188477	0.336188477
48	0.336414637	0.336414637	0.336414637	0.336414637	0.336414637	0.336414637	0.336414637	0.336414637	0.336414637	0.336414637	0.336414637	0.336414637	0.336414637	0.336414637	0.336414637	0.336414637	0.336414637	0.336414637	0.336414637	0.336414637	0.336414637	0.336414637	0.336414637	0.336414637	0.336414637	0.336414637	0.336414637	0.336414637	0.336414637	0.336414637	0.336414637	0.336414637	0.336414637	0.336414637	0.336414637	0.336414637	0.336414637	0.336414637	0.336414637	0.336414637	0.336414637	0.336414637	0.336414637	0.336414637	0.336414637	0.336414637	0.336414637	0.336414637	0.336414637
49	0.336499456	0.336499456	0.336499456	0.336499456	0.336499456	0.336499456	0.336499456	0.336499456	0.336499456	0.336499456	0.336499456	0.336499456	0.336499456	0.336499456	0.336499456	0.336499456	0.336499456	0.336499456	0.336499456	0.336499456	0.336499456	0.336499456	0.336499456	0.336499456	0.336499456	0.336499456	0.336499456	0.336499456	0.336499456	0.336499456	0.336499456	0.336499456	0.336499456	0.336499456	0.336499456	0.336499456	0.336499456	0.336499456	0.336499456	0.336499456	0.336499456	0.336499456	0.336499456	0.336499456	0.336499456	0.336499456	0.336499456	0.336499456	0.336499456
50	0.336452326	0.336452326	0.336452326	0.336452326	0.336452326	0.336452326	0.336452326	0.336452326	0.336452326	0.336452326	0.336452326	0.336452326	0.336452326	0.336452326	0.336452326	0.336452326	0.336452326	0.336452326	0.336452326	0.336452326	0.336452326	0.336452326	0.336452326	0.336452326	0.336452326	0.336452326	0.336452326	0.336452326	0.336452326	0.336452326	0.336452326	0.336452326	0.336452326	0.336452326	0.336452326	0.336452326	0.336452326	0.336452326	0.336452326	0.336452326	0.336452326	0.336452326	0.336452326	0.336452326	0.336452326	0.336452326	0.336452326	0.336452326	0.336452326
51	0.336285081	0.336285081	0.336285081	0.336285081	0.336285081	0.336285081	0.336285081	0.336285081	0.336285081	0.336285081	0.336285081	0.336285081	0.336285081	0.336285081	0.336285081	0.336285081	0.336285081	0.336285081	0.336285081	0.336285081	0.336285081	0.336285081	0.336285081	0.336285081	0.336285081	0.336285081	0.336285081	0.336285081	0.336285081	0.336285081	0.336285081	0.336285081	0.336285081	0.336285081	0.336285081	0.336285081	0.336285081	0.336285081	0.336285081	0.336285081	0.336285081	0.336285081	0.336285081	0.336285081	0.336285081	0.336285081	0.336285081	0.336285081	0.336285081
52	0.336010849	0.336010849	0.336010849	0.336010849	0.336010849	0.336010849	0.336010849	0.336010849	0.336010849	0.336010849	0.336010849	0.336010849	0.336010849	0.336010849	0.336010849	0.336010849	0.336010849	0.336010849	0.336010849	0.336010849	0.336010849	0.336010849	0.336010849	0.336010849	0.336010849	0.336010849	0.336010849	0.336010849	0.336010849	0.336010849	0.336010849	0.336010849	0.336010849	0.336010849	0.336010849	0.336010849	0.336010849	0.336010849	0.336010849	0.336010849	0.336010849	0.336010849	0.336010849	0.336010849	0.336010849	0.336010849	0.336010849	0.336010849	0.336010849
53	0.335633648	0.335633648	0.335633648	0.335633648	0.335633648	0.335633648	0.335633648	0.335633648	0.335633648	0.335633648	0.335633648	0.335633648	0.335633648	0.335633648	0.335633648	0.335633648	0.335633648	0.335633648	0.335633648	0.335633648	0.335633648	0.335633648	0.335633648	0.335633648	0.335633648	0.335633648	0.335633648	0.335633648	0.335633648	0.335633648	0.335633648	0.335633648	0.335633648	0.335633648	0.335633648	0.335633648	0.335633648	0.335633648	0.335633648	0.335633648	0.335633648	0.335633648	0.335633648	0.335633648	0.335633648	0.335633648	0.335633648	0.335633648	0.335633648
54	0.335169037	0.335169037	0.335169037	0.335169037	0.335169037	0.335169037	0.335169037	0.335169037	0.335169037	0.335169037	0.335169037	0.335169037	0.335169037	0.335169037	0.335169037	0.335169037	0.335169037	0.335169037	0.335169037	0.335169037	0.335169037	0.335169037	0.335169037	0.335169037	0.335169037	0.335169037	0.335169037	0.335169037	0.335169037	0.335169037	0.335169037	0.335169037	0.335169037	0.335169037	0.335169037	0.335169037	0.335169037	0.335169037	0.335169037	0.335169037	0.335169037	0.335169037	0.335169037	0.335169037	0.335169037	0.335169037	0.335169037	0.335169037	0.335169037
55	0.334632287	0.334632287	0.334632287	0.334632287	0.334632287	0.334632287	0.334632287	0.334632287	0.334632287	0.334632287	0.334632287	0.334632287	0.334632287	0.334632287	0.334632287	0.334632287	0.334632287	0.334632287	0.334632287	0.334632287	0.334632287	0.334632287	0.334632287	0.334632287	0.334632287	0.334632287	0.334632287	0.334632287	0.334632287	0.334632287	0.334632287	0.334632287	0.334632287	0.334632287	0.334632287	0.334632287	0.334632287	0.334632287	0.334632287	0.334632287	0.334632287	0.334632287	0.334632287	0.334632287	0.334632287	0.334632287	0.334632287	0.334632287	0.334632287
56	0.334038369	0.334038369	0.334038369	0.334038369	0.334038369	0.334038369	0.334038369	0.334038369	0.334038369	0.334038369	0.334038369	0.334038369	0.334038369	0.334038369	0.334038369	0.334038369	0.334038369	0.334038369	0.334038369	0.334038369	0.334038369	0.334038369	0.334038369	0.334038369	0.334038369	0.334038369	0.334038369	0.334038369	0.334038369	0.334038369	0.334038369	0.334038369	0.334038369	0.334038369	0.334038369	0.334038369	0.334038369	0.334038369	0.334038369	0.334038369	0.334038369	0.334038369	0.334038369	0.334038369	0.334038369	0.334038369	0.334038369	0.334038369	0.334038369
57	0.333398874	0.333398874	0.333398874	0.333398874	0.333398874	0.333398874	0.333398874	0.333398874	0.333398874	0.333398874	0.333398874	0.333398874	0.333398874	0.333398874	0.333398874	0.333398874	0.333398874	0.333398874	0.333398874	0.333398874	0.333398874	0.333398874	0.333398874	0.333398874	0.333398874	0.333398874	0.333398874	0.333398874	0.333398874	0.333398874	0.333398874	0.333398874	0.333398874	0.333398874	0.333398874	0.333398874	0.333398874	0.333398874	0.333398874	0.333398874	0.333398874	0.333398874	0.333398874	0.333398874	0.333398874	0.333398874	0.333398874	0.333398874	0.333398874
58	0.33270989	0.33270989	0.33270989	0.33270989	0.33270989	0.33270989	0.33270989	0.33270989	0.33270989	0.33270989	0.33270989	0.33270989	0.33270989	0.33270989	0.33270989	0.33270989	0.33270989	0.33270989	0.33270989	0.33270989	0.33270989	0.33270989	0.33270989	0.33270989	0.33270989	0.33270989	0.33270989	0.33270989	0.33270989	0.33270989	0.33270989	0.33270989	0.33270989	0.33270989	0.33270989	0.33270989	0.33270989	0.33270989	0.33270989	0.33270989	0.33270989	0.33270989	0.33270989	0.33270989	0.33270989	0.33270989	0.33270989	0.33270989	0.33270989
59	0.331993607	0.331993607	0.331993607	0.331993607	0.331993607	0.331993607	0.331993607	0.331993607	0.331993607	0.331993607	0.331993607	0.331993607	0.331993607	0.331993607	0.331993607	0.331993607	0.331993607	0.331993607	0.331993607	0.331993607	0.331993607	0.331993607	0.331993607	0.331993607	0.331993607	0.331993607	0.331993607	0.331993607	0.331993607	0.331993607	0.331993607	0.331993607	0.331993607	0.331993607	0.331993607	0.331993607	0.331993607	0.331993607	0.331993607	0.331993607	0.331993607	0.331993607	0.331993607	0.331993607	0.331993607	0.331993607	0.331993607	0.331993607	0.331993607
60	0.331262559	0.331262559	0.331262559	0.331262559	0.331262559	0.331262559	0.331262559	0.331262559	0.331262559	0.331262559	0.331262559	0.331262559	0.331262559	0.331262559	0.331262559	0.331262559	0.331262559	0.331262559	0.331262559	0.331262559	0.331262559	0.331262559	0.331262559	0.331262559	0.331262559	0.331262559	0.331262559	0.331262559	0.331262559	0.331262559	0.331262559	0.331262559	0.331262559	0.331262559	0.331262559	0.331262559	0.331262559	0.331262559	0.331262559	0.331262559	0.331262559	0.331262559	0.331262559	0.331262559	0.331262559	0.331262559	0.331262559	0.331262559	0.331262559
61	0.330529502	0.330529502	0.330529502	0.330529502	0.330529502	0.330529502	0.330529502	0.330529502	0.330529502	0.330529502	0.330529502	0.330529502	0.330529502	0.330529502	0.330529502	0.330529502	0.330529502	0.330529502	0.330529502	0.330529502	0.330529502	0.330529502	0.330529502	0.330529502	0.330529502	0.330529502	0.330529502	0.330529502	0.330529502	0.330529502	0.330529502	0.330529502	0.330529502	0.330529502	0.330529502	0.330529502	0.330529502	0.330529502	0.330529502	0.330529502	0.330529502	0.330529502	0.330529502	0.330529502	0.330529502	0.330529502	0.330529502	0.330529502	0.330529502
62	0.329794633	0.329794633	0.329794633	0.329794633	0.329794633	0.329794633	0.329794633	0.329794633	0.329794633	0.329794633	0.329794633	0.329794633	0.329794633	0.329794633	0.329794633	0.329794633	0.329794633	0.329794633	0.329794633	0.329794633	0.329794633	0.329794633	0.329794633	0.329794633	0.329794633	0.329794633	0.329794633	0.329794633	0.329794633	0.329794633	0.329794633	0.329794633	0.329794633	0.329794633	0.329794633	0.329794633	0.329794633	0.329794633	0.329794633	0.329794633	0.329794633	0.329794633	0.329794633	0.329794633	0.329794633	0.329794633	0.329794633	0.329794633	0.329794633
63	0.329061438	0.329061438	0.329061438	0.329061438	0.329061438	0.329061438	0.329061438	0.329061438	0.329061438	0.329061438	0.329061438	0.329061438	0.329061438	0.329061438	0.329061438	0.329061438	0.329061438	0.329061438	0.329061438	0.329061438	0.329061438	0.329061438	0.329061438	0.329061438	0.329061438	0.329061438	0.329061438	0.329061438	0.329061438	0.329061438	0.329061438	0.329061438	0.329061438	0.329061438	0.329061438	0.329061438	0.329061438	0.329061438	0.329061438	0.329061438	0.329061438	0.329061438	0.329061438	0.329061438	0.329061438	0.329061438	0.329061438	0.329061438	0.329061438
64	0.32834366	0.32834366	0.32834366	0.32834366	0.32834366	0.32834366	0.32834366	0.32834366	0.32834366	0.32834366	0.32834366	0.32834366	0.32834366	0.32834366	0.32834366	0.32834366	0.32834366	0.32834366	0.32834366	0.32834366	0.32834366	0.32834366	0.32834366	0.32834366	0.32834366	0.32834366	0.32834366	0.32834366	0.32834366	0.32834366	0.32834366	0.32834366	0.32834366	0.32834366	0.32834366	0.32834366	0.32834366	0.32834366	0.32834366	0.32834366	0.32834366	0.32834366	0.32834366	0.32834366	0.32834366	0.32834366	0.32834366	0.32834366	0.32834366
65	0.327648697	0.327648697	0.327648697	0.327648697	0.327648697	0.327648697	0.327648697	0.327648697	0.327648697	0.327648697	0.327648697	0.327648697	0.327648697	0.327648697	0.327648697	0.327648697	0.327648697	0.327648697	0.327648697	0.327648697	0.327648697	0.327648697	0.327648697	0.327648697	0.327648697	0.327648697	0.327648697	0.327648697	0.327648697	0.327648697	0.327648697	0.327648697	0.327648697	0.327648697	0.327648697	0.327648697	0.327648697	0.327648697	0.327648697	0.327648697	0.327648697	0.327648697	0.327648697	0.327648697	0.327648697	0.327648697	0.327648697	0.327648697	0.327648697
66	0.326983475	0.326983475	0.326983475	0.326983475	0.326983475	0.326983475	0.326983475	0.326983475	0.326983475	0.326983475	0.326983475	0.326983475	0.326983475	0.326983475	0.326983475	0.326983475	0.326983475	0.326983475	0.326983475	0.326983475	0.326983475	0.326983475	0.326983475	0.326983475	0.326983475	0.326983475	0.326983475	0.326983475	0.326983475	0.326983475	0.326983475	0.326983475	0.326983475	0.326983475	0.326983475	0.326983475	0.326983475	0.326983475	0.326983475	0.326983475	0.326983475	0.326983475	0.326983475	0.326983475	0.326983475	0.326983475	0.326983475	0.326983475	0.326983475
67	0.32634335	0.32634335	0.32634335	0.32634335	0.32634335	0.32634335	0.32634335	0.32634335	0.32634335	0.32634335	0.32634335	0.32634335	0.32634335	0.32634335	0.32634335	0.32634335	0.32634335	0.32634335	0.32634335	0.32634335	0.32634335	0.32634335	0.32634335	0.32634335	0.32634335	0.32634335	0.32634335	0.32634335	0.32634335	0.32634335	0.32634335	0.32634335	0.32634335	0.32634335	0.32634335	0.32634335	0.32634335	0.32634335	0.32634335	0.32634335	0.32634335	0.32634335	0.32634335	0.32634335	0.32634335	0.32634335	0.32634335	0.32634335	0.32634335
68	0.325737962	0.325737962	0.325737962	0.325737962	0.325737962	0.325737962	0.325737962	0.325737962	0.325737962	0.325737962	0.325737962	0.325737962	0.325737962	0.325737962	0.325737962	0.325737962	0.325737962	0.325737962	0.325737962	0.325737962	0.325737962	0.325737962	0.325737962	0.325737962	0.325737962	0.325737962	0.325737962	0.325737962	0.325737962	0.325737962	0.325737962	0.325737962	0.325737962	0.325737962	0.325737962	0.325737962	0.325737962	0.325737962	0.325737962	0.325737962	0.325737962	0.325737962	0.325737962	0.325737962	0.325737962	0.325737962	0.325737962	0.325737962	0.325737962
69	0.325171248	0.325171248	0.325171248	0.325171248	0.325171248	0.325171248	0.325171248	0.325171248	0.325171248	0.325171248	0.325171248	0.325171248	0.325171248	0.325171248	0.325171248	0.325171248	0.325171248	0.325171248	0.325171248	0.325171248	0.325171248	0.325171248	0.325171248	0.325171248	0.325171248	0.325171248	0.325171248	0.325171248	0.325171248	0.325171248	0.325171248	0.325171248	0.325171248	0.325171248	0.325171248	0.325171248	0.325171248	0.325171248	0.325171248	0.325171248	0.325171248	0.325171248	0.325171248	0.325171248	0.325171248	0.325171248	0.325171248	0.325171248	0.325171248
70	0.324646205	0.324646205	0.324646205	0.324646205	0.324646205	0.324646205	0.324646205	0.324646205	0.324646205	0.324646205	0.324646205	0.324646205	0.324646205	0.324646205	0.324646205	0.324646205	0.324646205	0.324646205	0.324646205	0.324646205	0.324646205	0.324646205	0.324646205	0.324646205	0.324646205	0.324646205	0.324646205	0.324646205	0.324646205	0.324646205	0.324646205	0.324646205	0.324646205	0.324646205	0.324646205	0.324646205	0.324646205	0.324646205	0.324646205	0.324646205	0.324646205	0.324646205	0.324646205	0.324646205	0.324646205	0.324646205	0.324646205	0.324646205	0.324646205
71	0.324165176	0.324165176	0.324165176	0.324165176	0.324165176	0.324165176	0.324165176	0.324165176	0.324165176	0.324165176	0.324165176	0.324165176	0.324165176	0.324165176	0.324165176	0.324165176	0.324165176	0.324165176	0.324165176	0.324165176	0.324165176	0.324165176	0.324165176	0.324165176	0.324165176	0.324165176	0.324165176	0.324165176	0.324165176	0.324165176	0.324165176	0.324165176	0.324165176	0.324165176	0.324165176	0.324165176	0.324165176	0.324165176	0.324165176	0.324165176	0.324165176	0.324165176	0.324165176	0.324165176	0.324165176	0.324165176	0.324165176	0.324165176	0.324165176
72	0.323729229	0.323729229	0.323729229	0.323729229	0.323729229	0.323729229	0.323729229	0.323729229	0.323729229	0.323729229	0.323729229	0.323729229	0.323729229	0.323729229	0.323729229	0.323729229	0.323729229	0.323729229	0.323729229	0.323729229	0.323729229	0.323729229	0.323729229	0.323729229	0.323729229	0.323729229	0.323729229	0.323729229	0.323729229	0.323729229	0.323729229	0.323729229	0.323729229	0.323729229	0.323729229	0.323729229	0.323729229	0.323729229	0.323729229	0.323729229	0.323729229	0.323729229	0.323729229	0.323729229	0.323729229	0.323729229	0.323729229	0.323729229	0.323729229
73	0.323337539	0.323337539	0.323337539	0.323337539	0.323337539	0.323337539	0.323337539	0.323337539	0.323337539	0.323337539	0.323337539	0.323337539	0.323337539	0.323337539	0.323337539	0.323337539	0.323337539	0.323337539	0.323337539	0.323337539	0.323337539	0.323337539	0.323337539	0.323337539	0.323337539	0.323337539	0.323337539	0.323337539	0.323337539	0.323337539	0.323337539	0.323337539	0.323337539	0.323337539	0.323337539	0.323337539	0.323337539	0.323337539	0.323337539	0.323337539	0.323337539	0.323337539	0.323337539	0.323337539	0.323337539	0.323337539	0.323337539	0.323337539	0.323337539
74	0.32299118	0.32299118	0.32299118	0.32299118	0.32299118	0.32299118	0.32299118	0.32299118	0.32299118	0.32299118	0.32299118	0.32299118	0.32299118	0.32299118	0.32299118	0.32299118	0.32299118	0.32299118	0.32299118	0.32299118	0.32299118	0.32299118	0.32299118	0.32299118	0.32299118	0.32299118	0.32299118	0.32299118	0.32299118	0.32299118	0.32299118	0.32299118	0.32299118	0.32299118	0.32299118	0.32299118	0.32299118	0.32299118	0.32299118	0.32299118	0.32299118	0.32299118	0.32299118	0.32299118	0.32299118	0.32299118	0.32299118	0.32299118	0.32299118
75	0.322689428	0.322689428	0.322689428	0.322689428	0.322689428	0.322689428	0.322689428	0.322689428	0.322689428	0.322689428	0.322689428	0.322689428	0.322689428	0.322689428	0.322689428	0.322689428	0.322689428	0.322689428	0.322689428	0.322689428	0.322689428	0.322689428	0.322689428	0.322689428	0.322689428	0.322689428	0.322689428	0.322689428	0.322689428	0.322689428	0.322689428	0.322689428	0.322689428	0.322689428	0.322689428	0.322689428	0.322689428	0.322689428	0.322689428	0.322689428	0.322689428	0.322689428	0.322689428	0.322689428	0.322689428	0.322689428	0.322689428	0.322689428	0.322689428
76	0.322430862	0.322430862	0.322430862	0.322430862	0.322430862	0.322430862	0.322430862	0.322430862	0.322430862	0.322430862	0.322430862	0.322430862	0.322430862	0.322430862	0.322430862	0.322430862	0.322430862	0.322430862	0.322430862	0.322430862	0.322430862	0.322430862	0.322430862	0.322430862	0.322430862	0.322430862	0.322430862	0.322430862	0.322430862	0.322430862	0.322430862	0.322430862	0.322430862	0.322430862	0.322430862	0.322430862	0.322430862	0.322430862	0.322430862	0.322430862	0.322430862	0.322430862	0.322430862	0.322430862	0.322430862	0.322430862	0.322430862	0.322430862	0.322430862
77	0.322213362	0.322213362	0.322213362	0.322213362	0.322213362	0.322213362	0.322213362	0.322213362	0.322213362	0.322213362	0.322213362	0.322213362	0.322213362	0.322213362	0.322213362	0.322213362	0.322213362	0.322213362	0.322213362	0.322213362	0.322213362	0.322213362	0.322213362	0.322213362	0.322213362	0.322213362	0.322213362	0.322213362	0.322213362	0.322213362	0.322213362	0.322213362	0.322213362	0.322213362	0.322213362	0.322213362	0.322213362	0.322213362	0.322213362	0.322213362	0.322213362	0.322213362	0.322213362	0.322213362	0.322213362	0.322213362	0.322213362	0.322213362	0.322213362
78	0.32203896	0.32203896	0.32203896	0.32203896	0.32203896	0.32203896	0.32203896	0.32203896	0.32203896	0.32203896	0.32203896	0.32203896	0.32203896	0.32203896	0.32203896	0.32203896	0.32203896	0.32203896	0.32203896	0.32203896	0.32203896	0.32203896	0.32203896	0.32203896	0.32203896	0.32203896	0.32203896	0.32203896	0.32203896	0.32203896	0.32203896	0.32203896	0.32203896	0.32203896	0.32203896	0.32203896	0.32203896	0.32203896	0.32203896	0.32203896	0.32203896	0.32203896	0.32203896	0.32203896	0.32203896	0.32203896	0.32203896	0.32203896	0.32203896
79	0.321906604	0.321906604	0.321906604	0.321906604	0.321906604	0.321906604	0.321906604	0.321906604	0.321906604	0.321906604	0.321906604	0.321906604	0.321906604	0.321906604	0.321906604	0.321906604	0.321906604	0.321906604	0.321906604	0.321906604	0.321906604	0.321906604	0.321906604	0.321906604	0.321906604	0.321906604	0.321906604	0.321906604	0.321906604	0.321906604	0.321906604	0.321906604	0.321906604	0.321906604	0.321906604	0.321906604	0.321906604	0.321906604	0.321906604	0.321906604	0.321906604	0.321906604	0.321906604	0.321906604	0.321906604	0.321906604	0.321906604	0.321906604	0.321906604
80	0.321811194	0.321811194	0.321811194	0.321811194	0.321811194	0.321811194	0.321811194	0.321811194	0.321811194	0.321811194	0.321811194	0.321811194	0.321811194	0.321811194	0.321811194	0.321811194	0.321811194	0.321811194	0.321811194	0.321811194	0.321811195	0.321811194	0.321811194	0.321811194	0.321811194	0.321811194	0.321811194	0.321811194	0.321811194	0.321811194	0.321811194	0.321811194	0.321811194	0.321811194	0.321811194	0.321811194	0.321811194	0.321811194	0.321811194	0.321811194	0.321811194	0.321811194	0.321811194	0.321811194	0.321811194	0.321811194	0.321811194	0.321811194	0.321811194
81	0.321749349	0.321749349	0.321749349	0.321749349	0.321749349	0.321749349	0.321749349	0.321749349	0.321749349	0.321749349	0.321749349	0.321749349	0.321749349	0.321749349	0.321749349	0.321749349	0.321749349	0.321749349	0.321749349	0.321749349	0.321749349	0.321749349	0.321749349	0.321749349	0.321749349	0.321749349	0.321749349	0.321749349	0.321749349	0.321749349	0.321749349	0.321749349	0.321749349	0.321749349	0.321749349	0.321749349	0.321749349	0.321749349	0.321749349	0.321749349	0.321749349	0.321749349	0.321749349	0.321749349	0.321749349	0.321749349	0.321749349	0.321749349	0.321749349
82	0.32171713	0.32171713	0.32171713	0.32171713	0.32171713	0.32171713	0.32171713	0.32171713	0.32171713	0.32171713	0.32171713	0.32171713	0.32171713	0.32171713	0.32171713	0.32171713	0.32171713	0.32171713	0.32171713	0.32171713	0.32171713	0.32171713	0.32171713	0.32171713	0.32171713	0.32171713	0.32171713	0.32171713	0.32171713	0.32171713	0.32171713	0.32171713	0.32171713	0.32171713	0.32171713	0.32171713	0.32171713	0.32171713	0.32171713	0.32171713	0.32171713	0.32171713	0.32171713	0.32171713	0.32171713	0.32171713	0.32171713	0.32171713	0.32171713
83	0.321710045	0.321710045	0.321710045	0.321710045	0.321710045	0.321710045	0.321710045	0.321710045	0.321710045	0.321710045	0.321710045	0.321710045	0.321710045	0.321710045	0.321710045	0.321710045	0.321710045	0.321710045	0.321710045	0.321710045	0.321710045	0.321710045	0.321710045	0.321710045	0.321710045	0.321710045	0.321710045	0.321710045	0.321710045	0.321710045	0.321710045	0.321710045	0.321710045	0.321710045	0.321710045	0.321710045	0.321710045	0.321710045	0.321710045	0.321710045	0.321710045	0.321710045	0.321710045	0.321710045	0.321710045	0.321710045	0.321710045	0.321710045	0.321710045
84	0.321737964	0.321737964	0.321737964	0.321737964	0.321737964	0.321737964	0.321737964	0.321737964	0.321737964	0.321737964	0.321737964	0.321737964	0.321737964	0.321737964	0.321737964	0.321737964	0.321737964	0.321737964	0.321737964	0.321737964	0.321737964	0.321737964	0.321737964	0.321737964	0.321737964	0.321737964	0.321737964	0.321737964	0.321737964	0.321737964	0.321737964	0.321737964	0.321737964	0.321737964	0.321737964	0.321737964	0.321737964	0.321737964	0.321737964	0.321737964	0.321737964	0.321737964	0.321737964	0.321737964	0.321737964	0.321737964	0.321737964	0.321737964	0.321737964
85	0.321791234	0.321791234	0.321791234	0.321791234	0.321791234	0.321791234	0.321791234	0.321791234	0.321791234	0.321791234	0.321791234	0.321791234	0.321791234	0.321791234	0.321791234	0.321791234	0.321791234	0.321791234	0.321791234	0.321791234	0.321791234	0.321791234	0.321791234	0.321791234	0.321791234	0.321791234	0.321791234	0.321791234	0.321791234	0.321791234	0.321791234	0.321791234	0.321791234	0.321791234	0.321791234	0.321791234	0.321791234	0.321791234	0.321791234	0.321791234	0.321791234	0.321791234	0.321791234	0.321791234	0.321791234	0.321791234	0.321791234	0.321791234	0.321791234
86	0.321865493	0.321865493	0.321865493	0.321865493	0.321865493	0.321865493	0.321865493	0.321865493	0.321865493	0.321865493	0.321865493	0.321865493	0.321865493	0.321865493	0.321865493	0.321865493	0.321865493	0.321865493	0.321865493	0.321865493	0.321865493	0.321865493	0.321865493	0.321865493	0.321865493	0.321865493	0.321865493	0.321865493	0.321865493	0.321865493	0.321865493	0.321865493	0.321865493	0.321865493	0.321865493	0.321865493	0.321865493	0.321865493	0.321865493	0.321865493	0.321865493	0.321865493	0.321865493	0.321865493	0.321865493	0.321865493	0.321865493	0.321865493	0.321865493
87	0.321956921	0.321956921	0.321956921	0.321956921	0.321956921	0.321956921	0.321956921	0.321956921	0.321956921	0.321956921	0.321956921	0.321956921	0.321956921	0.321956921	0.321956921	0.321956921	0.321956921	0.321956921	0.321956921	0.321956921	0.321956921	0.321956921	0.321956921	0.321956921	0.321956921	0.321956921	0.321956921	0.321956921	0.321956921	0.321956921	0.321956921	0.321956921	0.321956921	0.321956921	0.321956921	0.321956921	0.321956921	0.321956921	0.321956921	0.321956921	0.321956921	0.321956921	0.321956921	0.321956921	0.321956921	0.321956921	0.321956921	0.321956921	0.321956921
88	0.322061406	0.322061406	0.322061406	0.322061406	0.322061406	0.322061406	0.322061406	0.322061406	0.322061406	0.322061406	0.322061406	0.322061406	0.322061406	0.322061406	0.322061406	0.322061406	0.322061406	0.322061406	0.322061406	0.322061406	0.322061406	0.322061406	0.322061406	0.322061406	0.322061406	0.322061406	0.322061406	0.322061406	0.322061406	0.322061406	0.322061406	0.322061406	0.322061406	0.322061406	0.322061406	0.322061406	0.322061406	0.322061406	0.322061406	0.322061406	0.322061406	0.322061406	0.322061406	0.322061406	0.322061406	0.322061406	0.322061406	0.322061406	0.322061406
89	0.322177621	0.322177621	0.322177621	0.322177621	0.322177621	0.322177621	0.322177621	0.322177621	0.322177621	0.322177621	0.322177621	0.322177621	0.322177621	0.322177621	0.322177621	0.322177621	0.322177621	0.322177621	0.322177621	0.322177621	0.322177621	0.322177621	0.322177621	0.322177621	0.322177621	0.322177621	0.322177621	0.322177621	0.322177621	0.322177621	0.322177621	0.322177621	0.322177621	0.322177621	0.322177621	0.322177621	0.322177621	0.322177621	0.322177621	0.322177621	0.322177621	0.322177621	0.322177621	0.322177621	0.322177621	0.322177621	0.322177621	0.322177621	0.322177621
90	0.322312258	0.322312258	0.322312258	0.322312258	0.322312258	0.322312258	0.322312258	0.322312258	0.322312258	0.322312258	0.322312258	0.322312258	0.322312258	0.322312258	0.322312258	0.322312258	0.322312258	0.322312258	0.322312258	0.322312258	0.322312258	0.322312258	0.322312258	0.322312258	0.322312258	0.322312258	0.322312258	0.322312258	0.322312258	0.322312258	0.322312258	0.322312258	0.322312258	0.322312258	0.322312258	0.322312258	0.322312258	0.322312258	0.322312258	0.322312258	0.322312258	0.322312258	0.322312258	0.322312258	0.322312258	0.322312258	0.322312258	0.322312258	0.322312258
91	0.322456047	0.322456047	0.322456047	0.322456047	0.322456047	0.322456047	0.322456047	0.322456047	0.322456047	0.322456047	0.322456047	0.322456047	0.322456047	0.322456047	0.322456047	0.322456047	0.322456047	0.322456047	0.322456047	0.322456047	0.322456047	0.322456047	0.322456047	0.322456047	0.322456047	0.322456047	0.322456047	0.322456047	0.322456047	0.322456047	0.322456047	0.322456047	0.322456047	0.322456047	0.322456047	0.322456047	0.322456047	0.322456047	0.322456047	0.322456047	0.322456047	0.322456047	0.322456047	0.322456047	0.322456047	0.322456047	0.322456047	0.322456047	0.322456047
92	0.322606255	0.322606255	0.322606255	0.322606255	0.322606255	0.322606255	0.322606255	0.322606255	0.322606255	0.322606255	0.322606255	0.322606255	0.322606255	0.322606255	0.322606255	0.322606255	0.322606255	0.322606255	0.322606255	0.322606255	0.322606255	0.322606255	0.322606255	0.322606255	0.322606255	0.322606255	0.322606255	0.322606255	0.322606255	0.322606255	0.322606255	0.322606255	0.322606255	0.322606255	0.322606255	0.322606255	0.322606255	0.322606255	0.322606255	0.322606255	0.322606255	0.322606255	0.322606255	0.322606255	0.322606255	0.322606255	0.322606255	0.322606255	0.322606255
93	0.32276011	0.32276011	0.32276011	0.32276011	0.32276011	0.32276011	0.32276011	0.32276011	0.32276011	0.32276011	0.32276011	0.32276011	0.32276011	0.32276011	0.32276011	0.32276011	0.32276011	0.32276011	0.32276011	0.32276011	0.32276011	0.32276011	0.32276011	0.32276011	0.32276011	0.32276011	0.32276011	0.32276011	0.32276011	0.32276011	0.32276011	0.32276011	0.32276011	0.32276011	0.32276011	0.32276011	0.32276011	0.32276011	0.32276011	0.32276011	0.32276011	0.32276011	0.32276011	0.32276011	0.32276011	0.32276011	0.32276011	0.32276011	0.32276011
94	0.322914793	0.322914793	0.322914793	0.322914793	0.322914793	0.322914793	0.322914793	0.322914793	0.322914793	0.322914793	0.322914793	0.322914793	0.322914793	0.322914793	0.322914793	0.322914793	0.322914793	0.322914793	0.322914793	0.322914793	0.322914793	0.322914793	0.322914793	0.322914793	0.322914793	0.322914793	0.322914793	0.322914793	0.322914793	0.322914793	0.322914793	0.322914793	0.322914793	0.322914793	0.322914793	0.322914793	0.322914793	0.322914793	0.322914793	0.322914793	0.322914793	0.322914793	0.322914793	0.322914793	0.322914793	0.322914793	0.322914793	0.322914793	0.322914793
95	0.323071854	0.323071854	0.323071854	0.323071854	0.323071854	0.323071854	0.323071854	0.323071854	0.323071854	0.323071854	0.323071854	0.323071854	0.323071854	0.323071854	0.323071854	0.323071854	0.323071854	0.323071854	0.323071854	0.323071854	0.323071854	0.323071854	0.323071854	0.323071854	0.323071854	0.323071854	0.323071854	0.323071854	0.323071854	0.323071854	0.323071854	0.323071854	0.323071854	0.323071854	0.323071854	0.323071854	0.323071854	0.323071854	0.323071854	0.323071854	0.323071854	0.323071854	0.323071854	0.323071854	0.323071854	0.323071854	0.323071854	0.323071854	0.323071854
96	0.323231272	0.323231272	0.323231272	0.323231272	0.323231272	0.323231272	0.323231272	0.323231272	0.323231272	0.323231272	0.323231272	0.323231272	0.323231272	0.323231272	0.323231272	0.323231272	0.323231272	0.323231272	0.323231272	0.323231272	0.323231272	0.323231272	0.323231272	0.323231272	0.323231272	0.323231272	0.323231272	0.323231272	0.323231272	0.323231272	0.323231272	0.323231272	0.323231272	0.323231272	0.323231272	0.323231272	0.323231272	0.323231272	0.323231272	0.323231272	0.323231272	0.323231272	0.323231272	0.323231272	0.323231272	0.323231272	0.323231272	0.323231272	0.323231272
97	0.323389054	0.323389054	0.323389054	0.323389054	0.323389054	0.323389054	0.323389054	0.323389054	0.323389054	0.323389054	0.323389054	0.323389054	0.323389054	0.323389054	0.323389054	0.323389054	0.323389054	0.323389054	0.323389054	0.323389054	0.323389054	0.323389054	0.323389054	0.323389054	0.323389054	0.323389054	0.323389054	0.323389054	0.323389054	0.323389054	0.323389054	0.323389054	0.323389054	0.323389054	0.323389054	0.323389054	0.323389054	0.323389054	0.323389054	0.323389054	0.323389054	0.323389054	0.323389054	0.323389054	0.323389054	0.323389054	0.323389054	0.323389054	0.323389054
98	0.323543704	0.323543704	0.323543704	0.323543704	0.323543704	0.323543704	0.323543704	0.323543704	0.323543704	0.323543704	0.323543704	0.323543704	0.323543704	0.323543704	0.323543704	0.323543704	0.323543704	0.323543704	0.323543704	0.323543704	0.323543704	0.323543704	0.323543704	0.323543704	0.323543704	0.323543704	0.323543704	0.323543704	0.323543704	0.323543704	0.323543704	0.323543704	0.323543704	0.323543704	0.323543704	0.323543704	0.323543704	0.323543704	0.323543704	0.323543704	0.323543704	0.323543704	0.323543704	0.323543704	0.323543704	0.323543704	0.323543704	0.323543704	0.323543704
99	0.323693824	0.323693824	0.323693824	0.323693824	0.323693824	0.323693824	0.323693824	0.323693824	0.323693824	0.323693824	0.323693824	0.323693824	0.323693824	0.323693824	0.323693824	0.323693824	0.323693824	0.323693824	0.323693824	0.323693824	0.323693824	0.323693824	0.323693824	0.323693824	0.323693824	0.323693824	0.323693824	0.323693824	0.323693824	0.323693824	0.323693824	0.323693824	0.323693824	0.323693824	0.323693824	0.323693824	0.323693824	0.323693824	0.323693824	0.323693824	0.323693824	0.323693824	0.323693824	0.323693824	0.323693824	0.323693824	0.323693824	0.323693824	0.323693824
100	0.323838116	0.323838116	0.323838116	0.323838116	0.323838116	0.323838116	0.323838116	0.323838116	0.323838116	0.323838116	0.323838116	0.323838116	0.323838116	0.323838116	0.323838116	0.323838116	0.323838116	0.323838116	0.323838116	0.323838116	0.323838116	0.323838116	0.323838116	0.323838116	0.323838116	0.323838116	0.323838116	0.323838116	0.323838116	0.323838116	0.323838116	0.323838116	0.323838116	0.323838116	0.323838116	0.323838116	0.323838116	0.323838116	0.323838116	0.323838116	0.323838116	0.323838116	0.323838116	0.323838116	0.323838116	0.323838116	0.323838116	0.323838116	0.323838116
101	0.323977995	0.323977995	0.323977995	0.323977995	0.323977995	0.323977995	0.323977995	0.323977995	0.323977995	0.323977995	0.323977995	0.323977995	0.323977995	0.323977995	0.323977995	0.323977995	0.323977995	0.323977995	0.323977995	0.323977995	0.323977995	0.323977995	0.323977995	0.323977995	0.323977995	0.323977995	0.323977995	0.323977995	0.323977995	0.323977995	0.323977995	0.323977995	0.323977995	0.323977995	0.323977995	0.323977995	0.323977995	0.323977995	0.323977995	0.323977995	0.323977995	0.323977995	0.323977995	0.323977995	0.323977995	0.323977995	0.323977995	0.323977995	0.323977995
102	0.324111357	0.324111357	0.324111357	0.324111357	0.324111357	0.324111357	0.324111357	0.324111357	0.324111357	0.324111357	0.324111357	0.324111357	0.324111357	0.324111357	0.324111357	0.324111357	0.324111357	0.324111357	0.324111357	0.324111357	0.324111357	0.324111357	0.324111357	0.324111357	0.324111357	0.324111357	0.324111357	0.324111357	0.324111357	0.324111357	0.324111357	0.324111357	0.324111357	0.324111357	0.324111357	0.324111357	0.324111357	0.324111357	0.324111357	0.324111357	0.324111357	0.324111357	0.324111357	0.324111357	0.324111357	0.324111357	0.324111357	0.324111357	0.324111357
103	0.324237217	0.324237217	0.324237217	0.324237217	0.324237217	0.324237217	0.324237217	0.324237217	0.324237217	0.324237217	0.324237217	0.324237217	0.324237217	0.324237217	0.324237217	0.324237217	0.324237217	0.324237217	0.324237217	0.324237217	0.324237217	0.324237217	0.324237217	0.324237217	0.324237217	0.324237217	0.324237217	0.324237217	0.324237217	0.324237217	0.324237217	0.324237217	0.324237217	0.324237217	0.324237217	0.324237217	0.324237217	0.324237217	0.324237217	0.324237217	0.324237217	0.324237217	0.324237217	0.324237217	0.324237217	0.324237217	0.324237217	0.324237217	0.324237217
104	0.32435496	0.32435496	0.32435496	0.32435496	0.32435496	0.32435496	0.32435496	0.32435496	0.32435496	0.32435496	0.32435496	0.32435496	0.32435496	0.32435496	0.32435496	0.32435496	0.32435496	0.32435496	0.32435496	0.32435496	0.32435496	0.32435496	0.32435496	0.32435496	0.32435496	0.32435496	0.32435496	0.32435496	0.32435496	0.32435496	0.32435496	0.32435496	0.32435496	0.32435496	0.32435496	0.32435496	0.32435496	0.32435496	0.32435496	0.32435496	0.32435496	0.32435496	0.32435496	0.32435496	0.32435496	0.32435496	0.32435496	0.32435496	0.32435496
105	0.324464089	0.324464089	0.324464089	0.324464089	0.324464089	0.324464089	0.324464089	0.324464089	0.324464089	0.324464089	0.324464089	0.324464089	0.324464089	0.324464089	0.324464089	0.324464089	0.324464089	0.324464089	0.324464089	0.324464089	0.324464089	0.324464089	0.324464089	0.324464089	0.324464089	0.324464089	0.324464089	0.324464089	0.324464089	0.324464089	0.324464089	0.324464089	0.324464089	0.324464089	0.324464089	0.324464089	0.324464089	0.324464089	0.324464089	0.324464089	0.324464089	0.324464089	0.324464089	0.324464089	0.324464089	0.324464089	0.324464089	0.324464089	0.324464089
106	0.324564228	0.324564228	0.324564228	0.324564228	0.324564228	0.324564228	0.324564228	0.324564228	0.324564228	0.324564228	0.324564228	0.324564228	0.324564228	0.324564228	0.324564228	0.324564228	0.324564228	0.324564228	0.324564228	0.324564228	0.324564228	0.324564228	0.324564228	0.324564228	0.324564228	0.324564228	0.324564228	0.324564228	0.324564228	0.324564228	0.324564228	0.324564228	0.324564228	0.324564228	0.324564228	0.324564228	0.324564228	0.324564228	0.324564228	0.324564228	0.324564228	0.324564228	0.324564228	0.324564228	0.324564228	0.324564228	0.324564228	0.324564228	0.324564228
107	0.324655118	0.324655118	0.324655118	0.324655118	0.324655118	0.324655118	0.324655118	0.324655118	0.324655118	0.324655118	0.324655118	0.324655118	0.324655118	0.324655118	0.324655118	0.324655118	0.324655118	0.324655118	0.324655118	0.324655118	0.324655118	0.324655118	0.324655118	0.324655118	0.324655118	0.324655118	0.324655118	0.324655118	0.324655118	0.324655118	0.324655118	0.324655118	0.324655118	0.324655118	0.324655118	0.324655118	0.324655118	0.324655118	0.324655118	0.324655118	0.324655118	0.324655118	0.324655118	0.324655118	0.324655118	0.324655118	0.324655118	0.324655118	0.324655118
108	0.324736595	0.324736595	0.324736595	0.324736595	0.324736595	0.324736595	0.324736595	0.324736595	0.324736595	0.324736595	0.324736595	0.324736595	0.324736595	0.324736595	0.324736595	0.324736595	0.324736595	0.324736595	0.324736595	0.324736595	0.324736595	0.324736595	0.324736595	0.324736595	0.324736595	0.324736595	0.324736595	0.324736595	0.324736595	0.324736595	0.324736595	0.324736595	0.324736595	0.324736595	0.324736595	0.324736595	0.324736595	0.324736595	0.324736595	0.324736595	0.324736595	0.324736595	0.324736595	0.324736595	0.324736595	0.324736595	0.324736595	0.324736595	0.324736595
109	0.324808518	0.324808518	0.324808518	0.324808518	0.324808518	0.324808518	0.324808518	0.324808518	0.324808518	0.324808518	0.324808518	0.324808518	0.324808518	0.324808518	0.324808518	0.324808518	0.324808518	0.324808518	0.324808518	0.324808518	0.324808518	0.324808518	0.324808518	0.324808518	0.324808518	0.324808518	0.324808518	0.324808518	0.324808518	0.324808518	0.324808518	0.324808518	0.324808518	0.324808518	0.324808518	0.324808518	0.324808518	0.324808518	0.324808518	0.324808518	0.324808518	0.324808518	0.324808518	0.324808518	0.324808518	0.324808518	0.324808518	0.324808518	0.324808518
110	0.324871056	0.324871056	0.324871056	0.324871056	0.324871056	0.324871056	0.324871056	0.324871056	0.324871056	0.324871056	0.324871056	0.324871056	0.324871056	0.324871056	0.324871056	0.324871056	0.324871056	0.324871056	0.324871056	0.324871056	0.324871056	0.324871056	0.324871056	0.324871056	0.324871056	0.324871056	0.324871056	0.324871056	0.324871056	0.324871056	0.324871056	0.324871056	0.324871056	0.324871056	0.324871056	0.324871056	0.324871056	0.324871056	0.324871056	0.324871056	0.324871056	0.324871056	0.324871056	0.324871056	0.324871056	0.324871056	0.324871056	0.324871056	0.324871056
111	0.324924412	0.324924412	0.324924412	0.324924412	0.324924412	0.324924412	0.324924412	0.324924412	0.324924412	0.324924412	0.324924412	0.324924412	0.324924412	0.324924412	0.324924412	0.324924412	0.324924412	0.324924412	0.324924412	0.324924412	0.324924412	0.324924412	0.324924412	0.324924412	0.324924412	0.324924412	0.324924412	0.324924412	0.324924412	0.324924412	0.324924412	0.324924412	0.324924412	0.324924412	0.324924412	0.324924412	0.324924412	0.324924412	0.324924412	0.324924412	0.324924412	0.324924412	0.324924412	0.324924412	0.324924412	0.324924412	0.324924412	0.324924412	0.324924412
112	0.324968907	0.324968907	0.324968907	0.324968907	0.324968907	0.324968907	0.324968907	0.324968907	0.324968907	0.324968907	0.324968907	0.324968907	0.324968907	0.324968907	0.324968907	0.324968907	0.324968907	0.324968907	0.324968907	0.324968907	0.324968907	0.324968907	0.324968907	0.324968907	0.324968907	0.324968907	0.324968907	0.324968907	0.324968907	0.324968907	0.324968907	0.324968907	0.324968907	0.324968907	0.324968907	0.324968907	0.324968907	0.324968907	0.324968907	0.324968907	0.324968907	0.324968907	0.324968907	0.324968907	0.324968907	0.324968907	0.324968907	0.324968907	0.324968907
113	0.325004979	0.325004979	0.325004979	0.325004979	0.325004979	0.325004979	0.325004979	0.325004979	0.325004979	0.325004979	0.325004979	0.325004979	0.325004979	0.325004979	0.325004979	0.325004979	0.325004979	0.325004979	0.325004979	0.325004979	0.325004979	0.325004979	0.325004979	0.325004979	0.325004979	0.325004979	0.325004979	0.325004979	0.325004979	0.325004979	0.325004979	0.325004979	0.325004979	0.325004979	0.325004979	0.325004979	0.325004979	0.325004979	0.325004979	0.325004979	0.325004979	0.325004979	0.325004979	0.325004979	0.325004979	0.325004979	0.325004979	0.325004979	0.325004979
114	0.325033187	0.325033187	0.325033187	0.325033187	0.325033187	0.325033187	0.325033187	0.325033187	0.325033187	0.325033187	0.325033187	0.325033187	0.325033187	0.325033187	0.325033187	0.325033187	0.325033187	0.325033187	0.325033187	0.325033187	0.325033186	0.325033187	0.325033187	0.325033187	0.325033187	0.325033187	0.325033187	0.325033187	0.325033187	0.325033187	0.325033187	0.325033187	0.325033187	0.325033187	0.325033187	0.325033187	0.325033187	0.325033187	0.325033187	0.325033187	0.325033187	0.325033187	0.325033187	0.325033187	0.325033187	0.325033187	0.325033187	0.325033187	0.325033187
115	0.325054203	0.325054203	0.325054203	0.325054203	0.325054203	0.325054203	0.325054203	0.325054203	0.325054203	0.325054203	0.325054203	0.325054203	0.325054203	0.325054203	0.325054203	0.325054203	0.325054203	0.325054203	0.325054203	0.325054203	0.325054203	0.325054203	0.325054203	0.325054203	0.325054203	0.325054203	0.325054203	0.325054203	0.325054203	0.325054203	0.325054203	0.325054203	0.325054203	0.325054203	0.325054203	0.325054203	0.325054203	0.325054203	0.325054203	0.325054203	0.325054203	0.325054203	0.325054203	0.325054203	0.325054203	0.325054203	0.325054203	0.325054203	0.325054203
116	0.325067064	0.325067064	0.325067064	0.325067064	0.325067064	0.325067064	0.325067064	0.325067064	0.325067064	0.325067064	0.325067064	0.325067064	0.325067064	0.325067064	0.325067064	0.325067064	0.325067064	0.325067064	0.325067064	0.325067064	0.325067064	0.325067064	0.325067064	0.325067064	0.325067064	0.325067064	0.325067064	0.325067064	0.325067064	0.325067064	0.325067064	0.325067064	0.325067064	0.325067064	0.325067064	0.325067064	0.325067064	0.325067064	0.325067064	0.325067064	0.325067064	0.325067064	0.325067064	0.325067064	0.325067064	0.325067064	0.325067064	0.325067064	0.325067064
117	0.325071311	0.325071311	0.325071311	0.325071311	0.325071311	0.325071311	0.325071311	0.325071311	0.325071311	0.325071311	0.325071311	0.325071311	0.325071311	0.325071311	0.325071311	0.325071311	0.325071311	0.325071311	0.325071311	0.325071311	0.325071311	0.325071311	0.325071311	0.325071311	0.325071311	0.325071311	0.325071311	0.325071311	0.325071311	0.325071311	0.325071311	0.325071311	0.325071311	0.325071311	0.325071311	0.325071311	0.325071311	0.325071311	0.325071311	0.325071311	0.325071311	0.325071311	0.325071311	0.325071311	0.325071311	0.325071311	0.325071311	0.325071311	0.325071311
118	0.32506906	0.32506906	0.32506906	0.32506906	0.32506906	0.32506906	0.32506906	0.32506906	0.32506906	0.32506906	0.32506906	0.32506906	0.32506906	0.32506906	0.32506906	0.32506906	0.32506906	0.32506906	0.32506906	0.32506906	0.325069059	0.32506906	0.32506906	0.32506906	0.32506906	0.32506906	0.32506906	0.32506906	0.32506906	0.32506906	0.32506906	0.32506906	0.32506906	0.32506906	0.32506906	0.32506906	0.32506906	0.32506906	0.32506906	0.32506906	0.32506906	0.32506906	0.32506906	0.32506906	0.32506906	0.32506906	0.32506906	0.32506906	0.32506906
119	0.325061077	0.325061077	0.325061077	0.325061077	0.325061077	0.325061077	0.325061077	0.325061077	0.325061077	0.325061077	0.325061077	0.325061077	0.325061077	0.325061077	0.325061077	0.325061077	0.325061077	0.325061077	0.325061077	0.325061077	0.325061077	0.325061077	0.325061077	0.325061077	0.325061077	0.325061077	0.325061077	0.325061077	0.325061077	0.325061077	0.325061077	0.325061077	0.325061077	0.325061077	0.325061077	0.325061077	0.325061077	0.325061077	0.325061077	0.325061077	0.325061077	0.325061077	0.325061077	0.325061077	0.325061077	0.325061077	0.325061077	0.325061077	0.325061077
120	0.325048221	0.325048221	0.325048221	0.325048221	0.325048221	0.325048221	0.325048221	0.325048221	0.325048221	0.325048221	0.325048221	0.325048221	0.325048221	0.325048221	0.325048221	0.325048221	0.325048221	0.325048221	0.325048221	0.325048221	0.32504822	0.325048221	0.325048221	0.325048221	0.325048221	0.325048221	0.325048221	0.325048221	0.325048221	0.325048221	0.325048221	0.325048221	0.325048221	0.325048221	0.325048221	0.325048221	0.325048221	0.325048221	0.325048221	0.325048221	0.325048221	0.325048221	0.325048221	0.325048221	0.325048221	0.325048221	0.325048221	0.325048221	0.325048221
121	0.325031436	0.325031436	0.325031436	0.325031436	0.325031436	0.325031436	0.325031436	0.325031436	0.325031436	0.325031436	0.325031436	0.325031436	0.325031436	0.325031436	0.325031436	0.325031436	0.325031436	0.325031436	0.325031436	0.325031436	0.325031436	0.325031436	0.325031436	0.325031436	0.325031436	0.325031436	0.325031436	0.325031436	0.325031436	0.325031436	0.325031436	0.325031436	0.325031436	0.325031436	0.325031436	0.325031436	0.325031436	0.325031436	0.325031436	0.325031436	0.325031436	0.325031436	0.325031436	0.325031436	0.325031436	0.325031436	0.325031436	0.325031436	0.325031436
122	0.32501176	0.32501176	0.32501176	0.32501176	0.32501176	0.32501176	0.32501176	0.32501176	0.32501176	0.32501176	0.32501176	0.32501176	0.32501176	0.32501176	0.32501176	0.32501176	0.32501176	0.32501176	0.32501176	0.32501176	0.32501176	0.32501176	0.32501176	0.32501176	0.32501176	0.32501176	0.32501176	0.32501176	0.32501176	0.32501176	0.32501176	0.32501176	0.32501176	0.32501176	0.32501176	0.32501176	0.32501176	0.32501176	0.32501176	0.32501176	0.32501176	0.32501176	0.32501176	0.32501176	0.32501176	0.32501176	0.32501176	0.32501176	0.32501176
123	0.32499032	0.32499032	0.32499032	0.32499032	0.32499032	0.32499032	0.32499032	0.32499032	0.32499032	0.32499032	0.32499032	0.32499032	0.32499032	0.32499032	0.32499032	0.32499032	0.32499032	0.32499032	0.32499032	0.32499032	0.32499032	0.32499032	0.32499032	0.32499032	0.32499032	0.32499032	0.32499032	0.32499032	0.32499032	0.32499032	0.32499032	0.32499032	0.32499032	0.32499032	0.32499032	0.32499032	0.32499032	0.32499032	0.32499032	0.32499032	0.32499032	0.32499032	0.32499032	0.32499032	0.32499032	0.32499032	0.32499032	0.32499032	0.32499032
124	0.324962836	0.324962836	0.324962836	0.324962836	0.324962836	0.324962836	0.324962836	0.324962836	0.324962836	0.324962836	0.324962836	0.324962836	0.324962836	0.324962836	0.324962836	0.324962836	0.324962836	0.324962836	0.324962836	0.324962836	0.324962836	0.324962836	0.324962836	0.324962836	0.324962836	0.324962836	0.324962836	0.324962836	0.324962836	0.324962836	0.324962836	0.324962836	0.324962836	0.324962836	0.324962836	0.324962836	0.324962836	0.324962836	0.324962836	0.324962836	0.324962836	0.324962836	0.324962836	0.324962836	0.324962836	0.324962836	0.324962836	0.324962836	0.324962836
125	0.324931696	0.324931696	0.324931696	0.324931696	0.324931696	0.324931696	0.324931696	0.324931696	0.324931696	0.324931696	0.324931696	0.324931696	0.324931696	0.324931696	0.324931696	0.324931696	0.324931696	0.324931696	0.324931696	0.324931696	0.324931696	0.324931696	0.324931696	0.324931696	0.324931696	0.324931696	0.324931696	0.324931696	0.324931696	0.324931696	0.324931696	0.324931696	0.324931696	0.324931696	0.324931696	0.324931696	0.324931696	0.324931696	0.324931696	0.324931696	0.324931696	0.324931696	0.324931696	0.324931696	0.324931696	0.324931696	0.324931696	0.324931696	0.324931696
126	0.324898806	0.324898806	0.324898806	0.324898806	0.324898806	0.324898806	0.324898806	0.324898806	0.324898806	0.324898806	0.324898806	0.324898806	0.324898806	0.324898806	0.324898806	0.324898806	0.324898806	0.324898806	0.324898806	0.324898806	0.324898806	0.324898806	0.324898806	0.324898806	0.324898806	0.324898806	0.324898806	0.324898806	0.324898806	0.324898806	0.324898806	0.324898806	0.324898806	0.324898806	0.324898806	0.324898806	0.324898806	0.324898806	0.324898806	0.324898806	0.324898806	0.324898806	0.324898806	0.324898806	0.324898806	0.324898806	0.324898806	0.324898806	0.324898806
127	0.324864949	0.324864949	0.324864949	0.324864949	0.324864949	0.324864949	0.324864949	0.324864949	0.324864949	0.324864949	0.324864949	0.324864949	0.324864949	0.324864949	0.324864949	0.324864949	0.324864949	0.324864949	0.324864949	0.324864949	0.324864949	0.324864949	0.324864949	0.324864949	0.324864949	0.324864949	0.324864949	0.324864949	0.324864949	0.324864949	0.324864949	0.324864949	0.324864949	0.324864949	0.324864949	0.324864949	0.324864949	0.324864949	0.324864949	0.324864949	0.324864949	0.324864949	0.324864949	0.324864949	0.324864949	0.324864949	0.324864949	0.324864949	0.324864949
128	0.324830945	0.324830945	0.324830945	0.324830944	0.324830944	0.324830945	0.324830944	0.324830945	0.324830945	0.324830945	0.324830944	0.324830944	0.324830944	0.324830945	0.324830944	0.324830945	0.324830944	0.324830945	0.324830945	0.324830945	0.324830944	0.324830944	0.324830945	0.324830944	0.324830944	0.324830945	0.324830944	0.324830945	0.324830944	0.324830945	0.324830945	0.324830944	0.324830945	0.324830945	0.324830944	0.324830944	0.324830944	0.324830945	0.324830944	0.324830945	0.324830945	0.324830945	0.324830945	0.324830945	0.324830944	0.324830944	0.324830945	0.324830944	0.324830944
129	0.324797652	0.324797652	0.324797652	0.324797652	0.324797652	0.324797652	0.324797652	0.324797652	0.324797652	0.324797652	0.324797652	0.324797652	0.324797652	0.324797652	0.324797652	0.324797652	0.324797652	0.324797652	0.324797652	0.324797652	0.324797652	0.324797652	0.324797652	0.324797652	0.324797652	0.324797652	0.324797652	0.324797652	0.324797652	0.324797652	0.324797652	0.324797652	0.324797652	0.324797652	0.324797652	0.324797652	0.324797652	0.324797652	0.324797652	0.324797652	0.324797652	0.324797652	0.324797652	0.324797652	0.324797652	0.324797652	0.324797652	0.324797652	0.324797652
130	0.324765971	0.324765971	0.324765971	0.324765971	0.324765971	0.324765971	0.324765971	0.324765971	0.324765971	0.324765971	0.324765971	0.324765971	0.324765971	0.324765971	0.324765971	0.324765971	0.324765971	0.324765971	0.324765971	0.324765971	0.324765971	0.324765971	0.324765971	0.324765971	0.324765971	0.324765971	0.324765971	0.324765971	0.324765971	0.324765971	0.324765971	0.324765971	0.324765971	0.324765971	0.324765971	0.324765971	0.324765971	0.324765971	0.324765971	0.324765971	0.324765971	0.324765971	0.324765971	0.324765971	0.324765971	0.324765971	0.324765971	0.324765971	0.324765971
131	0.324736321	0.324736321	0.324736321	0.324736321	0.324736321	0.324736321	0.324736321	0.324736321	0.324736321	0.324736321	0.324736321	0.324736321	0.324736321	0.324736321	0.324736321	0.324736321	0.324736321	0.324736321	0.324736321	0.324736321	0.324736321	0.324736321	0.324736321	0.324736321	0.324736321	0.324736321	0.324736321	0.324736321	0.324736321	0.324736321	0.324736321	0.324736321	0.324736321	0.324736321	0.324736321	0.324736321	0.324736321	0.324736321	0.324736321	0.324736321	0.324736321	0.324736321	0.324736321	0.324736321	0.324736321	0.324736321	0.324736321	0.324736321	0.324736321
132	0.324703221	0.324703221	0.324703221	0.324703221	0.324703221	0.324703221	0.324703221	0.324703221	0.324703221	0.324703221	0.324703221	0.324703221	0.324703221	0.324703221	0.324703221	0.324703221	0.324703221	0.324703221	0.324703221	0.324703221	0.324703221	0.324703221	0.324703221	0.324703221	0.324703221	0.324703221	0.324703221	0.324703221	0.324703221	0.324703221	0.324703221	0.324703221	0.324703221	0.324703221	0.324703221	0.324703221	0.324703221	0.324703221	0.324703221	0.324703221	0.324703221	0.324703221	0.324703221	0.324703221	0.324703221	0.324703221	0.324703221	0.324703221	0.324703221
133	0.324671254	0.324671254	0.324671254	0.324671254	0.324671254	0.324671254	0.324671254	0.324671254	0.324671254	0.324671254	0.324671254	0.324671254	0.324671254	0.324671254	0.324671254	0.324671254	0.324671254	0.324671254	0.324671254	0.324671254	0.324671254	0.324671254	0.324671254	0.324671254	0.324671254	0.324671254	0.324671254	0.324671254	0.324671254	0.324671254	0.324671254	0.324671254	0.324671254	0.324671254	0.324671254	0.324671254	0.324671254	0.324671254	0.324671254	0.324671254	0.324671254	0.324671254	0.324671254	0.324671254	0.324671254	0.324671254	0.324671254	0.324671254	0.324671254
134	0.324640813	0.324640813	0.324640813	0.324640813	0.324640813	0.324640813	0.324640813	0.324640813	0.324640813	0.324640813	0.324640813	0.324640813	0.324640813	0.324640813	0.324640813	0.324640813	0.324640813	0.324640813	0.324640813	0.324640813	0.324640813	0.324640813	0.324640813	0.324640813	0.324640813	0.324640813	0.324640813	0.324640813	0.324640813	0.324640813	0.324640813	0.324640813	0.324640813	0.324640813	0.324640813	0.324640813	0.324640813	0.324640813	0.324640813	0.324640813	0.324640813	0.324640813	0.324640813	0.324640813	0.324640813	0.324640813	0.324640813	0.324640813	0.324640813
135	0.324612279	0.324612279	0.324612279	0.324612279	0.324612279	0.324612279	0.324612279	0.324612279	0.324612279	0.324612279	0.324612279	0.324612279	0.324612279	0.324612279	0.324612279	0.324612279	0.324612279	0.324612279	0.324612279	0.324612279	0.324612279	0.324612279	0.324612279	0.324612279	0.324612279	0.324612279	0.324612279	0.324612279	0.324612279	0.324612279	0.324612279	0.324612279	0.324612279	0.324612279	0.324612279	0.324612279	0.324612279	0.324612279	0.324612279	0.324612279	0.324612279	0.324612279	0.324612279	0.324612279	0.324612279	0.324612279	0.324612279	0.324612279	0.324612279
136	0.324586022	0.324586022	0.324586022	0.324586022	0.324586022	0.324586022	0.324586022	0.324586022	0.324586022	0.324586022	0.324586022	0.324586022	0.324586022	0.324586022	0.324586022	0.324586022	0.324586022	0.324586022	0.324586022	0.324586022	0.324586022	0.324586022	0.324586022	0.324586022	0.324586022	0.324586022	0.324586022	0.324586022	0.324586022	0.324586022	0.324586022	0.324586022	0.324586022	0.324586022	0.324586022	0.324586022	0.324586022	0.324586022	0.324586022	0.324586022	0.324586022	0.324586022	0.324586022	0.324586022	0.324586022	0.324586022	0.324586022	0.324586022	0.324586022
137	0.324562399	0.324562399	0.324562399	0.324562399	0.324562399	0.324562399	0.324562399	0.324562399	0.324562399	0.324562399	0.324562399	0.324562399	0.324562399	0.324562399	0.324562399	0.324562399	0.324562399	0.324562399	0.324562399	0.324562399	0.324562399	0.324562399	0.324562399	0.324562399	0.324562399	0.324562399	0.324562399	0.324562399	0.324562399	0.324562399	0.324562399	0.324562399	0.324562399	0.324562399	0.324562399	0.324562399	0.324562399	0.324562399	0.324562399	0.324562399	0.324562399	0.324562399	0.324562399	0.324562399	0.324562399	0.324562399	0.324562399	0.324562399	0.324562399
138	0.324541759	0.324541759	0.324541759	0.324541759	0.324541759	0.324541759	0.324541759	0.324541759	0.324541759	0.324541759	0.324541759	0.324541759	0.324541759	0.324541759	0.324541759	0.324541759	0.324541759	0.324541759	0.324541759	0.324541759	0.324541759	0.324541759	0.324541759	0.324541759	0.324541759	0.324541759	0.324541759	0.324541759	0.324541759	0.324541759	0.324541759	0.324541759	0.324541759	0.324541759	0.324541759	0.324541759	0.324541759	0.324541759	0.324541759	0.324541759	0.324541759	0.324541759	0.324541759	0.324541759	0.324541759	0.324541759	0.324541759	0.324541759	0.324541759
139	0.32452324	0.32452324	0.32452324	0.32452324	0.32452324	0.32452324	0.32452324	0.32452324	0.32452324	0.32452324	0.32452324	0.32452324	0.32452324	0.32452324	0.32452324	0.32452324	0.32452324	0.32452324	0.32452324	0.32452324	0.32452324	0.32452324	0.32452324	0.32452324	0.32452324	0.32452324	0.32452324	0.32452324	0.32452324	0.32452324	0.32452324	0.32452324	0.32452324	0.32452324	0.32452324	0.32452324	0.32452324	0.32452324	0.32452324	0.32452324	0.32452324	0.32452324	0.32452324	0.32452324	0.32452324	0.32452324	0.32452324	0.32452324	0.32452324
140	0.324505418	0.324505418	0.324505418	0.324505418	0.324505418	0.324505418	0.324505418	0.324505418	0.324505418	0.324505418	0.324505418	0.324505418	0.324505418	0.324505418	0.324505418	0.324505418	0.324505418	0.324505418	0.324505418	0.324505418	0.324505418	0.324505418	0.324505418	0.324505418	0.324505418	0.324505418	0.324505418	0.324505418	0.324505418	0.324505418	0.324505418	0.324505418	0.324505418	0.324505418	0.324505418	0.324505418	0.324505418	0.324505418	0.324505418	0.324505418	0.324505418	0.324505418	0.324505418	0.324505418	0.324505418	0.324505418	0.324505418	0.324505418	0.324505418
141	0.324489785	0.324489785	0.324489785	0.324489785	0.324489785	0.324489785	0.324489785	0.324489785	0.324489785	0.324489785	0.324489785	0.324489785	0.324489785	0.324489785	0.324489785	0.324489785	0.324489785	0.324489785	0.324489785	0.324489785	0.324489785	0.324489785	0.324489785	0.324489785	0.324489785	0.324489785	0.324489785	0.324489785	0.324489785	0.324489785	0.324489785	0.324489785	0.324489785	0.324489785	0.324489785	0.324489785	0.324489785	0.324489785	0.324489785	0.324489785	0.324489785	0.324489785	0.324489785	0.324489785	0.324489785	0.324489785	0.324489785	0.324489785	0.324489785
142	0.32447631	0.32447631	0.32447631	0.32447631	0.32447631	0.32447631	0.32447631	0.32447631	0.32447631	0.32447631	0.32447631	0.32447631	0.32447631	0.32447631	0.32447631	0.32447631	0.32447631	0.32447631	0.32447631	0.32447631	0.32447631	0.32447631	0.32447631	0.32447631	0.32447631	0.32447631	0.32447631	0.32447631	0.32447631	0.32447631	0.32447631	0.32447631	0.32447631	0.32447631	0.32447631	0.32447631	0.32447631	0.32447631	0.32447631	0.32447631	0.32447631	0.32447631	0.32447631	0.32447631	0.32447631	0.32447631	0.32447631	0.32447631	0.32447631
143	0.324464927	0.324464927	0.324464927	0.324464927	0.324464927	0.324464927	0.324464927	0.324464927	0.324464927	0.324464927	0.324464927	0.324464927	0.324464927	0.324464927	0.324464927	0.324464927	0.324464927	0.324464927	0.324464927	0.324464927	0.324464927	0.324464927	0.324464927	0.324464927	0.324464927	0.324464927	0.324464927	0.324464927	0.324464927	0.324464927	0.324464927	0.324464927	0.324464927	0.324464927	0.324464927	0.324464927	0.324464927	0.324464927	0.324464927	0.324464927	0.324464927	0.324464927	0.324464927	0.324464927	0.324464927	0.324464927	0.324464927	0.324464927	0.324464927
144	0.324455533	0.324455533	0.324455533	0.324455533	0.324455533	0.324455533	0.324455533	0.324455533	0.324455533	0.324455533	0.324455533	0.324455533	0.324455533	0.324455533	0.324455533	0.324455533	0.324455533	0.324455533	0.324455533	0.324455533	0.324455533	0.324455533	0.324455533	0.324455533	0.324455533	0.324455533	0.324455533	0.324455533	0.324455533	0.324455533	0.324455533	0.324455533	0.324455533	0.324455533	0.324455533	0.324455533	0.324455533	0.324455532	0.324455533	0.324455533	0.324455533	0.324455533	0.324455533	0.324455533	0.324455533	0.324455533	0.324455533	0.324455533	0.324455533
145	0.324447987	0.324447987	0.324447987	0.324447987	0.324447987	0.324447987	0.324447987	0.324447987	0.324447987	0.324447987	0.324447987	0.324447987	0.324447987	0.324447987	0.324447987	0.324447987	0.324447987	0.324447987	0.324447987	0.324447987	0.324447987	0.324447987	0.324447987	0.324447987	0.324447987	0.324447987	0.324447987	0.324447987	0.324447987	0.324447987	0.324447987	0.324447987	0.324447987	0.324447987	0.324447987	0.324447987	0.324447987	0.324447987	0.324447987	0.324447987	0.324447987	0.324447987	0.324447987	0.324447987	0.324447987	0.324447987	0.324447987	0.324447987	0.324447987
146	0.324442117	0.324442117	0.324442117	0.324442117	0.324442117	0.324442117	0.324442117	0.324442117	0.324442117	0.324442117	0.324442117	0.324442117	0.324442117	0.324442117	0.324442117	0.324442117	0.324442117	0.324442117	0.324442117	0.324442117	0.324442117	0.324442117	0.324442117	0.324442117	0.324442117	0.324442117	0.324442117	0.324442117	0.324442117	0.324442117	0.324442117	0.324442117	0.324442117	0.324442117	0.324442117	0.324442117	0.324442117	0.324442117	0.324442117	0.324442117	0.324442117	0.324442117	0.324442117	0.324442117	0.324442117	0.324442117	0.324442117	0.324442117	0.324442117
147	0.324438702	0.324438702	0.324438702	0.324438702	0.324438702	0.324438702	0.324438702	0.324438702	0.324438702	0.324438702	0.324438702	0.324438702	0.324438702	0.324438702	0.324438702	0.324438702	0.324438702	0.324438702	0.324438702	0.324438702	0.324438702	0.324438702	0.324438702	0.324438702	0.324438702	0.324438702	0.324438702	0.324438702	0.324438702	0.324438702	0.324438702	0.324438702	0.324438702	0.324438702	0.324438702	0.324438702	0.324438702	0.324438702	0.324438702	0.324438702	0.324438702	0.324438702	0.324438702	0.324438702	0.324438702	0.324438702	0.324438702	0.324438702	0.324438702
148	0.324437421	0.324437421	0.324437421	0.324437421	0.324437421	0.324437421	0.324437421	0.324437421	0.324437421	0.324437421	0.324437421	0.324437421	0.324437421	0.324437421	0.324437421	0.324437421	0.324437421	0.324437421	0.324437421	0.324437421	0.324437421	0.324437421	0.324437421	0.324437421	0.324437421	0.324437421	0.324437421	0.324437421	0.324437421	0.324437421	0.324437421	0.324437421	0.324437421	0.324437421	0.324437421	0.324437421	0.324437421	0.324437421	0.324437421	0.324437421	0.324437421	0.324437421	0.324437421	0.324437421	0.324437421	0.324437421	0.324437421	0.324437421	0.324437421
149	0.324437703	0.324437703	0.324437703	0.324437703	0.324437703	0.324437703	0.324437703	0.324437703	0.324437703	0.324437703	0.324437703	0.324437703	0.324437703	0.324437703	0.324437703	0.324437703	0.324437703	0.324437703	0.324437703	0.324437703	0.324437703	0.324437703	0.324437703	0.324437703	0.324437703	0.324437703	0.324437703	0.324437703	0.324437703	0.324437703	0.324437703	0.324437703	0.324437703	0.324437703	0.324437703	0.324437703	0.324437703	0.324437703	0.324437703	0.324437703	0.324437703	0.324437703	0.324437703	0.324437703	0.324437703	0.324437703	0.324437703	0.324437703	0.324437703
150	0.324439324	0.324439324	0.324439324	0.324439324	0.324439324	0.324439324	0.324439324	0.324439324	0.324439324	0.324439324	0.324439324	0.324439324	0.324439324	0.324439324	0.324439324	0.324439324	0.324439324	0.324439324	0.324439324	0.324439324	0.324439324	0.324439324	0.324439324	0.324439324	0.324439324	0.324439324	0.324439324	0.324439324	0.324439324	0.324439324	0.324439324	0.324439324	0.324439324	0.324439324	0.324439324	0.324439324	0.324439324	0.324439324	0.324439324	0.324439324	0.324439324	0.324439324	0.324439324	0.324439324	0.324439324	0.324439324	0.324439324	0.324439324	0.324439324
151	0.324442027	0.324442027	0.324442027	0.324442027	0.324442027	0.324442027	0.324442027	0.324442027	0.324442027	0.324442027	0.324442027	0.324442027	0.324442027	0.324442027	0.324442027	0.324442027	0.324442027	0.324442027	0.324442027	0.324442027	0.324442027	0.324442027	0.324442027	0.324442027	0.324442027	0.324442027	0.324442027	0.324442027	0.324442027	0.324442027	0.324442027	0.324442027	0.324442027	0.324442027	0.324442027	0.324442027	0.324442027	0.324442027	0.324442027	0.324442027	0.324442027	0.324442027	0.324442027	0.324442027	0.324442027	0.324442027	0.324442027	0.324442027	0.324442027
152	0.324445527	0.324445527	0.324445527	0.324445527	0.324445527	0.324445527	0.324445527	0.324445527	0.324445527	0.324445527	0.324445527	0.324445527	0.324445527	0.324445527	0.324445527	0.324445527	0.324445527	0.324445527	0.324445527	0.324445527	0.324445527	0.324445527	0.324445527	0.324445527	0.324445527	0.324445527	0.324445527	0.324445527	0.324445527	0.324445527	0.324445527	0.324445527	0.324445527	0.324445527	0.324445527	0.324445527	0.324445527	0.324445527	0.324445527	0.324445527	0.324445527	0.324445527	0.324445527	0.324445527	0.324445527	0.324445527	0.324445527	0.324445527	0.324445527
153	0.324449506	0.324449506	0.324449506	0.324449506	0.324449506	0.324449506	0.324449506	0.324449506	0.324449506	0.324449506	0.324449506	0.324449506	0.324449506	0.324449506	0.324449506	0.324449506	0.324449506	0.324449506	0.324449506	0.324449506	0.324449507	0.324449506	0.324449506	0.324449506	0.324449506	0.324449506	0.324449506	0.324449506	0.324449506	0.324449506	0.324449506	0.324449506	0.324449506	0.324449506	0.324449506	0.324449506	0.324449506	0.324449506	0.324449506	0.324449506	0.324449506	0.324449506	0.324449506	0.324449506	0.324449506	0.324449506	0.324449506	0.324449506	0.324449506
154	0.32445362	0.32445362	0.324453619	0.32445362	0.32445362	0.324453619	0.32445362	0.32445362	0.324453619	0.324453619	0.32445362	0.32445362	0.32445362	0.32445362	0.32445362	0.324453619	0.32445362	0.324453619	0.32445362	0.32445362	0.32445362	0.32445362	0.32445362	0.32445362	0.32445362	0.324453619	0.32445362	0.32445362	0.32445362	0.32445362	0.324453619	0.32445362	0.32445362	0.324453619	0.32445362	0.32445362	0.32445362	0.324453619	0.32445362	0.324453619	0.324453619	0.32445362	0.324453619	0.32445362	0.32445362	0.32445362	0.324453619	0.32445362	0.32445362
155	0.324457489	0.324457489	0.324457489	0.324457489	0.324457489	0.324457489	0.324457489	0.324457489	0.324457489	0.324457489	0.324457489	0.324457489	0.324457489	0.324457489	0.324457489	0.324457489	0.324457489	0.324457489	0.324457489	0.324457489	0.324457489	0.324457489	0.324457489	0.324457489	0.324457489	0.324457489	0.324457489	0.324457489	0.324457489	0.324457489	0.324457489	0.324457489	0.324457489	0.324457489	0.324457489	0.324457489	0.324457489	0.324457489	0.324457489	0.324457489	0.324457489	0.324457489	0.324457489	0.324457489	0.324457489	0.324457489	0.324457489	0.324457489	0.324457489
156	0.324460853	0.324460853	0.324460853	0.324460853	0.324460853	0.324460853	0.324460853	0.324460853	0.324460853	0.324460853	0.324460853	0.324460853	0.324460853	0.324460853	0.324460853	0.324460853	0.324460853	0.324460853	0.324460853	0.324460853	0.324460853	0.324460853	0.324460853	0.324460853	0.324460853	0.324460853	0.324460853	0.324460853	0.324460853	0.324460853	0.324460853	0.324460853	0.324460853	0.324460853	0.324460853	0.324460853	0.324460853	0.324460853	0.324460853	0.324460853	0.324460853	0.324460853	0.324460853	0.324460853	0.324460853	0.324460853	0.324460853	0.324460853	0.324460853
157	0.324467954	0.324467954	0.324467954	0.324467954	0.324467954	0.324467954	0.324467954	0.324467954	0.324467954	0.324467954	0.324467954	0.324467954	0.324467954	0.324467954	0.324467954	0.324467954	0.324467954	0.324467954	0.324467954	0.324467954	0.324467954	0.324467954	0.324467954	0.324467954	0.324467954	0.324467954	0.324467954	0.324467954	0.324467954	0.324467954	0.324467954	0.324467954	0.324467954	0.324467954	0.324467954	0.324467954	0.324467954	0.324467954	0.324467954	0.324467954	0.324467954	0.324467954	0.324467954	0.324467954	0.324467954	0.324467954	0.324467954	0.324467954	0.324467954
158	0.324475336	0.324475336	0.324475336	0.324475336	0.324475336	0.324475336	0.324475336	0.324475336	0.324475336	0.324475336	0.324475336	0.324475336	0.324475336	0.324475336	0.324475336	0.324475336	0.324475336	0.324475336	0.324475336	0.324475336	0.324475336	0.324475336	0.324475336	0.324475336	0.324475336	0.324475336	0.324475336	0.324475336	0.324475336	0.324475336	0.324475336	0.324475336	0.324475336	0.324475336	0.324475336	0.324475336	0.324475336	0.324475336	0.324475336	0.324475336	0.324475336	0.324475336	0.324475336	0.324475336	0.324475336	0.324475336	0.324475336	0.324475336	0.324475336
159	0.324482791	0.324482791	0.324482791	0.324482791	0.324482791	0.324482791	0.324482791	0.324482791	0.324482791	0.324482791	0.324482791	0.324482791	0.324482791	0.324482791	0.324482791	0.324482791	0.324482791	0.324482791	0.324482791	0.324482791	0.324482791	0.324482791	0.324482791	0.324482791	0.324482791	0.324482791	0.324482791	0.324482791	0.324482791	0.324482791	0.324482791	0.324482791	0.324482791	0.324482791	0.324482791	0.324482791	0.324482791	0.324482791	0.324482791	0.324482791	0.324482791	0.324482791	0.324482791	0.324482791	0.324482791	0.324482791	0.324482791	0.324482791	0.324482791
160	0.3244901	0.3244901	0.3244901	0.3244901	0.3244901	0.3244901	0.3244901	0.3244901	0.3244901	0.3244901	0.3244901	0.3244901	0.3244901	0.3244901	0.3244901	0.3244901	0.3244901	0.3244901	0.3244901	0.3244901	0.3244901	0.3244901	0.3244901	0.3244901	0.3244901	0.3244901	0.3244901	0.3244901	0.3244901	0.3244901	0.3244901	0.3244901	0.3244901	0.3244901	0.3244901	0.3244901	0.3244901	0.3244901	0.3244901	0.3244901	0.3244901	0.3244901	0.3244901	0.3244901	0.3244901	0.3244901	0.3244901	0.3244901	0.3244901
161	0.324497029	0.324497029	0.324497029	0.324497029	0.324497029	0.324497029	0.324497029	0.324497029	0.324497029	0.324497029	0.324497029	0.324497029	0.324497029	0.324497029	0.324497029	0.324497029	0.324497029	0.324497029	0.324497029	0.324497029	0.324497029	0.324497029	0.324497029	0.324497029	0.324497029	0.324497029	0.324497029	0.324497029	0.324497029	0.324497029	0.324497029	0.324497029	0.324497029	0.324497029	0.324497029	0.324497029	0.324497029	0.324497029	0.324497029	0.324497029	0.324497029	0.324497029	0.324497029	0.324497029	0.324497029	0.324497029	0.324497029	0.324497029	0.324497029
162	0.324503337	0.324503337	0.324503337	0.324503337	0.324503337	0.324503337	0.324503337	0.324503337	0.324503336	0.324503337	0.324503337	0.324503337	0.324503337	0.324503337	0.324503337	0.324503337	0.324503337	0.324503337	0.324503337	0.324503337	0.324503337	0.324503337	0.324503337	0.324503337	0.324503337	0.324503336	0.324503337	0.324503337	0.324503337	0.324503337	0.324503337	0.324503337	0.324503337	0.324503337	0.324503337	0.324503337	0.324503337	0.324503336	0.324503337	0.324503337	0.324503337	0.324503337	0.324503337	0.324503337	0.324503337	0.324503337	0.324503337	0.324503337	0.324503337
163	0.324508765	0.324508765	0.324508765	0.324508765	0.324508765	0.324508765	0.324508765	0.324508765	0.324508765	0.324508765	0.324508765	0.324508765	0.324508765	0.324508765	0.324508765	0.324508765	0.324508765	0.324508765	0.324508765	0.324508765	0.324508765	0.324508765	0.324508765	0.324508765	0.324508765	0.324508765	0.324508765	0.324508765	0.324508765	0.324508765	0.324508765	0.324508765	0.324508765	0.324508765	0.324508765	0.324508765	0.324508765	0.324508765	0.324508765	0.324508765	0.324508765	0.324508765	0.324508765	0.324508765	0.324508765	0.324508765	0.324508765	0.324508765	0.324508765
164	0.324513045	0.324513045	0.324513045	0.324513045	0.324513045	0.324513045	0.324513045	0.324513045	0.324513045	0.324513045	0.324513045	0.324513045	0.324513045	0.324513045	0.324513045	0.324513045	0.324513045	0.324513045	0.324513045	0.324513045	0.324513045	0.324513045	0.324513045	0.324513045	0.324513045	0.324513045	0.324513045	0.324513045	0.324513045	0.324513045	0.324513045	0.324513045	0.324513045	0.324513045	0.324513045	0.324513045	0.324513045	0.324513045	0.324513045	0.324513045	0.324513045	0.324513045	0.324513045	0.324513045	0.324513045	0.324513045	0.324513045	0.324513045	0.324513045
165	0.324515897	0.324515897	0.324515897	0.324515897	0.324515897	0.324515897	0.324515897	0.324515897	0.324515897	0.324515897	0.324515897	0.324515897	0.324515897	0.324515897	0.324515897	0.324515897	0.324515897	0.324515897	0.324515897	0.324515897	0.324515897	0.324515897	0.324515897	0.324515897	0.324515897	0.324515897	0.324515897	0.324515897	0.324515897	0.324515897	0.324515897	0.324515897	0.324515897	0.324515897	0.324515897	0.324515897	0.324515897	0.324515897	0.324515897	0.324515897	0.324515897	0.324515897	0.324515897	0.324515897	0.324515897	0.324515897	0.324515897	0.324515897	0.324515897
166	0.324518561	0.324518561	0.324518561	0.324518561	0.324518561	0.324518561	0.324518561	0.324518561	0.324518561	0.324518561	0.324518561	0.324518561	0.324518561	0.324518561	0.324518561	0.324518561	0.324518561	0.324518561	0.324518561	0.324518561	0.324518561	0.324518561	0.324518561	0.324518561	0.324518561	0.324518561	0.324518561	0.324518561	0.324518561	0.324518561	0.324518561	0.324518561	0.324518561	0.324518561	0.324518561	0.324518561	0.324518561	0.324518561	0.324518561	0.324518561	0.324518561	0.324518561	0.324518561	0.324518561	0.324518561	0.324518561	0.324518561	0.324518561	0.324518561
167	0.324522718	0.324522718	0.324522718	0.324522718	0.324522718	0.324522718	0.324522718	0.324522718	0.324522718	0.324522718	0.324522718	0.324522718	0.324522718	0.324522718	0.324522718	0.324522718	0.324522718	0.324522718	0.324522718	0.324522718	0.324522718	0.324522718	0.324522718	0.324522718	0.324522718	0.324522718	0.324522718	0.324522718	0.324522718	0.324522718	0.324522718	0.324522718	0.324522718	0.324522718	0.324522718	0.324522718	0.324522718	0.324522718	0.324522718	0.324522718	0.324522718	0.324522718	0.324522718	0.324522718	0.324522718	0.324522718	0.324522718	0.324522718	0.324522718
168	0.324526284	0.324526284	0.324526284	0.324526284	0.324526284	0.324526284	0.324526284	0.324526284	0.324526284	0.324526284	0.324526284	0.324526284	0.324526284	0.324526284	0.324526284	0.324526284	0.324526284	0.324526284	0.324526284	0.324526284	0.324526284	0.324526284	0.324526284	0.324526284	0.324526284	0.324526284	0.324526284	0.324526284	0.324526284	0.324526284	0.324526284	0.324526284	0.324526284	0.324526284	0.324526284	0.324526284	0.324526284	0.324526284	0.324526284	0.324526284	0.324526284	0.324526284	0.324526284	0.324526284	0.324526284	0.324526284	0.324526284	0.324526284	0.324526284
169	0.324529201	0.324529201	0.324529201	0.324529201	0.324529201	0.324529201	0.324529201	0.324529201	0.324529201	0.324529201	0.324529201	0.324529201	0.324529201	0.324529201	0.324529201	0.324529201	0.324529201	0.324529201	0.324529201	0.324529201	0.324529201	0.324529201	0.324529201	0.324529201	0.324529201	0.324529201	0.324529201	0.324529201	0.324529201	0.324529201	0.324529201	0.324529201	0.324529201	0.324529201	0.324529201	0.324529201	0.324529201	0.324529201	0.324529201	0.324529201	0.324529201	0.324529201	0.324529201	0.324529201	0.324529201	0.324529201	0.324529201	0.324529201	0.324529201
170	0.324531411	0.324531411	0.324531411	0.324531411	0.324531411	0.324531411	0.324531411	0.324531411	0.324531411	0.324531411	0.324531411	0.324531411	0.324531411	0.324531411	0.324531411	0.324531411	0.324531411	0.324531411	0.324531411	0.324531411	0.324531411	0.324531411	0.324531411	0.324531411	0.324531411	0.324531411	0.324531411	0.324531411	0.324531411	0.324531411	0.324531411	0.324531411	0.324531411	0.324531411	0.324531411	0.324531411	0.324531411	0.324531411	0.324531411	0.324531411	0.324531411	0.324531411	0.324531411	0.324531411	0.324531411	0.324531411	0.324531411	0.324531411	0.324531411
171	0.324532864	0.324532864	0.324532864	0.324532864	0.324532864	0.324532864	0.324532864	0.324532864	0.324532864	0.324532864	0.324532864	0.324532864	0.324532864	0.324532864	0.324532864	0.324532864	0.324532864	0.324532864	0.324532864	0.324532864	0.324532864	0.324532864	0.324532864	0.324532864	0.324532864	0.324532864	0.324532864	0.324532864	0.324532864	0.324532864	0.324532864	0.324532864	0.324532864	0.324532864	0.324532864	0.324532864	0.324532864	0.324532864	0.324532864	0.324532864	0.324532864	0.324532864	0.324532864	0.324532864	0.324532864	0.324532864	0.324532864	0.324532864	0.324532864
172	0.324533512	0.324533512	0.324533512	0.324533512	0.324533512	0.324533512	0.324533512	0.324533512	0.324533512	0.324533512	0.324533512	0.324533512	0.324533512	0.324533512	0.324533512	0.324533512	0.324533512	0.324533512	0.324533512	0.324533512	0.324533512	0.324533512	0.324533512	0.324533512	0.324533512	0.324533512	0.324533512	0.324533512	0.324533512	0.324533512	0.324533512	0.324533512	0.324533512	0.324533512	0.324533512	0.324533512	0.324533512	0.324533512	0.324533512	0.324533512	0.324533512	0.324533512	0.324533512	0.324533512	0.324533512	0.324533512	0.324533512	0.324533512	0.324533512
173	0.324533311	0.324533311	0.324533311	0.324533311	0.324533311	0.324533311	0.324533311	0.324533311	0.324533311	0.324533311	0.324533311	0.324533311	0.324533311	0.324533311	0.324533311	0.324533311	0.324533311	0.324533311	0.324533311	0.324533311	0.324533311	0.324533311	0.324533311	0.324533311	0.324533311	0.324533311	0.324533311	0.324533311	0.324533311	0.324533311	0.324533311	0.324533311	0.324533311	0.324533311	0.324533311	0.324533311	0.324533311	0.324533311	0.324533311	0.324533311	0.324533311	0.324533311	0.324533311	0.324533311	0.324533311	0.324533311	0.324533311	0.324533311	0.324533311
174	0.324532223	0.324532223	0.324532223	0.324532223	0.324532223	0.324532223	0.324532223	0.324532223	0.324532223	0.324532223	0.324532223	0.324532223	0.324532223	0.324532223	0.324532223	0.324532223	0.324532223	0.324532223	0.324532223	0.324532223	0.324532223	0.324532223	0.324532223	0.324532223	0.324532223	0.324532223	0.324532223	0.324532223	0.324532223	0.324532223	0.324532223	0.324532223	0.324532223	0.324532223	0.324532223	0.324532223	0.324532223	0.324532223	0.324532223	0.324532223	0.324532223	0.324532223	0.324532223	0.324532223	0.324532223	0.324532223	0.324532223	0.324532223	0.324532223
175	0.324530214	0.324530214	0.324530214	0.324530214	0.324530214	0.324530214	0.324530214	0.324530214	0.324530214	0.324530214	0.324530214	0.324530214	0.324530214	0.324530214	0.324530214	0.324530214	0.324530214	0.324530214	0.324530214	0.324530214	0.324530214	0.324530214	0.324530214	0.324530214	0.324530214	0.324530214	0.324530214	0.324530214	0.324530214	0.324530214	0.324530214	0.324530214	0.324530214	0.324530214	0.324530214	0.324530214	0.324530214	0.324530214	0.324530214	0.324530214	0.324530214	0.324530214	0.324530214	0.324530214	0.324530214	0.324530214	0.324530214	0.324530214	0.324530214
176	0.324528305	0.324528305	0.324528305	0.324528305	0.324528305	0.324528305	0.324528305	0.324528305	0.324528305	0.324528305	0.324528305	0.324528305	0.324528305	0.324528305	0.324528305	0.324528305	0.324528305	0.324528305	0.324528305	0.324528305	0.324528305	0.324528305	0.324528305	0.324528305	0.324528305	0.324528305	0.324528305	0.324528305	0.324528305	0.324528305	0.324528305	0.324528305	0.324528305	0.324528305	0.324528305	0.324528305	0.324528305	0.324528305	0.324528305	0.324528305	0.324528305	0.324528305	0.324528305	0.324528305	0.324528305	0.324528305	0.324528305	0.324528305	0.324528305
177	0.32452627	0.32452627	0.32452627	0.32452627	0.32452627	0.32452627	0.32452627	0.32452627	0.32452627	0.32452627	0.32452627	0.32452627	0.32452627	0.32452627	0.32452627	0.32452627	0.32452627	0.32452627	0.32452627	0.32452627	0.32452627	0.32452627	0.32452627	0.32452627	0.32452627	0.32452627	0.32452627	0.32452627	0.32452627	0.32452627	0.32452627	0.32452627	0.32452627	0.32452627	0.32452627	0.32452627	0.32452627	0.32452627	0.32452627	0.32452627	0.32452627	0.32452627	0.32452627	0.32452627	0.32452627	0.32452627	0.32452627	0.32452627	0.32452627
178	0.32452386	0.32452386	0.32452386	0.32452386	0.324523859	0.32452386	0.32452386	0.32452386	0.324523859	0.32452386	0.324523859	0.32452386	0.32452386	0.32452386	0.324523859	0.32452386	0.324523859	0.32452386	0.32452386	0.32452386	0.324523859	0.32452386	0.32452386	0.324523859	0.324523859	0.324523859	0.324523859	0.32452386	0.324523859	0.32452386	0.32452386	0.324523859	0.32452386	0.32452386	0.32452386	0.32452386	0.324523859	0.32452386	0.324523859	0.32452386	0.32452386	0.32452386	0.32452386	0.32452386	0.32452386	0.324523859	0.32452386	0.32452386	0.32452386
179	0.324521148	0.324521148	0.324521148	0.324521148	0.324521148	0.324521148	0.324521148	0.324521148	0.324521148	0.324521148	0.324521148	0.324521148	0.324521148	0.324521148	0.324521148	0.324521148	0.324521148	0.324521148	0.324521148	0.324521148	0.324521148	0.324521148	0.324521148	0.324521148	0.324521148	0.324521148	0.324521148	0.324521148	0.324521148	0.324521148	0.324521148	0.324521148	0.324521148	0.324521148	0.324521148	0.324521148	0.324521148	0.324521148	0.324521148	0.324521148	0.324521148	0.324521148	0.324521148	0.324521148	0.324521148	0.324521148	0.324521148	0.324521148	0.324521148
180	0.324518221	0.324518221	0.324518221	0.324518221	0.324518221	0.324518221	0.324518221	0.324518221	0.324518221	0.324518221	0.324518221	0.324518221	0.324518221	0.324518221	0.324518221	0.324518221	0.324518221	0.324518221	0.324518221	0.324518221	0.324518221	0.324518221	0.324518221	0.324518221	0.324518221	0.324518221	0.324518221	0.324518221	0.324518221	0.324518221	0.324518221	0.324518221	0.324518221	0.324518221	0.324518221	0.324518221	0.324518221	0.324518221	0.324518221	0.324518221	0.324518221	0.324518221	0.324518221	0.324518221	0.324518221	0.324518221	0.324518221	0.324518221	0.324518221
181	0.324515174	0.324515174	0.324515174	0.324515174	0.324515174	0.324515174	0.324515174	0.324515174	0.324515174	0.324515174	0.324515174	0.324515174	0.324515174	0.324515174	0.324515174	0.324515174	0.324515174	0.324515174	0.324515174	0.324515174	0.324515174	0.324515174	0.324515174	0.324515174	0.324515174	0.324515174	0.324515174	0.324515174	0.324515174	0.324515174	0.324515174	0.324515174	0.324515174	0.324515174	0.324515174	0.324515174	0.324515174	0.324515174	0.324515174	0.324515174	0.324515174	0.324515174	0.324515174	0.324515174	0.324515174	0.324515174	0.324515174	0.324515174	0.324515174
182	0.324512112	0.324512112	0.324512112	0.324512112	0.324512112	0.324512112	0.324512112	0.324512112	0.324512112	0.324512112	0.324512112	0.324512112	0.324512112	0.324512112	0.324512112	0.324512112	0.324512112	0.324512112	0.324512112	0.324512112	0.324512112	0.324512112	0.324512112	0.324512112	0.324512112	0.324512112	0.324512112	0.324512112	0.324512112	0.324512112	0.324512112	0.324512112	0.324512112	0.324512112	0.324512112	0.324512112	0.324512112	0.324512112	0.324512112	0.324512112	0.324512112	0.324512112	0.324512112	0.324512112	0.324512112	0.324512112	0.324512112	0.324512112	0.324512112
183	0.324509148	0.324509148	0.324509148	0.324509148	0.324509148	0.324509148	0.324509148	0.324509148	0.324509148	0.324509148	0.324509148	0.324509148	0.324509148	0.324509148	0.324509148	0.324509148	0.324509148	0.324509148	0.324509148	0.324509148	0.324509148	0.324509148	0.324509148	0.324509148	0.324509148	0.324509148	0.324509148	0.324509148	0.324509148	0.324509148	0.324509148	0.324509148	0.324509148	0.324509148	0.324509148	0.324509148	0.324509148	0.324509148	0.324509148	0.324509148	0.324509148	0.324509148	0.324509148	0.324509148	0.324509148	0.324509148	0.324509148	0.324509148	0.324509148
184	0.324506409	0.324506409	0.324506409	0.324506409	0.324506409	0.324506409	0.324506409	0.324506409	0.324506409	0.324506409	0.324506409	0.324506409	0.324506409	0.324506409	0.324506409	0.324506409	0.324506409	0.324506409	0.324506409	0.324506409	0.324506409	0.324506409	0.324506409	0.324506409	0.324506409	0.324506409	0.324506409	0.324506409	0.324506409	0.324506409	0.324506409	0.324506409	0.324506409	0.324506409	0.324506409	0.324506409	0.324506409	0.324506409	0.324506409	0.324506409	0.324506409	0.324506409	0.324506409	0.324506409	0.324506409	0.324506409	0.324506409	0.324506409	0.324506409
185	0.324503931	0.324503931	0.324503931	0.324503931	0.324503931	0.324503931	0.324503931	0.324503931	0.324503931	0.324503931	0.324503931	0.324503931	0.324503931	0.324503931	0.324503931	0.324503931	0.324503931	0.324503931	0.324503931	0.324503931	0.324503931	0.324503931	0.324503931	0.324503931	0.324503931	0.324503931	0.324503931	0.324503931	0.324503931	0.324503931	0.324503931	0.324503931	0.324503931	0.324503931	0.324503931	0.324503931	0.324503931	0.324503931	0.324503931	0.324503931	0.324503931	0.324503931	0.324503931	0.324503931	0.324503931	0.324503931	0.324503931	0.324503931	0.324503931
186	0.324500648	0.324500648	0.324500648	0.324500648	0.324500648	0.324500648	0.324500648	0.324500648	0.324500648	0.324500648	0.324500648	0.324500648	0.324500648	0.324500648	0.324500648	0.324500648	0.324500648	0.324500648	0.324500648	0.324500648	0.324500648	0.324500648	0.324500648	0.324500648	0.324500648	0.324500648	0.324500648	0.324500648	0.324500648	0.324500648	0.324500648	0.324500648	0.324500648	0.324500648	0.324500648	0.324500648	0.324500648	0.324500648	0.324500648	0.324500648	0.324500648	0.324500648	0.324500648	0.324500648	0.324500648	0.324500648	0.324500648	0.324500648	0.324500648
187	0.324497506	0.324497506	0.324497506	0.324497506	0.324497506	0.324497506	0.324497506	0.324497506	0.324497506	0.324497506	0.324497506	0.324497506	0.324497506	0.324497506	0.324497506	0.324497506	0.324497506	0.324497506	0.324497506	0.324497506	0.324497506	0.324497506	0.324497506	0.324497506	0.324497506	0.324497506	0.324497506	0.324497506	0.324497506	0.324497506	0.324497506	0.324497506	0.324497506	0.324497506	0.324497506	0.324497506	0.324497506	0.324497506	0.324497506	0.324497506	0.324497506	0.324497506	0.324497506	0.324497506	0.324497506	0.324497506	0.324497506	0.324497506	0.324497506
188	0.32449459	0.32449459	0.32449459	0.32449459	0.32449459	0.32449459	0.32449459	0.32449459	0.32449459	0.32449459	0.32449459	0.32449459	0.32449459	0.32449459	0.32449459	0.32449459	0.32449459	0.32449459	0.32449459	0.32449459	0.32449459	0.32449459	0.32449459	0.32449459	0.32449459	0.32449459	0.32449459	0.32449459	0.32449459	0.32449459	0.32449459	0.32449459	0.32449459	0.32449459	0.32449459	0.32449459	0.32449459	0.32449459	0.32449459	0.32449459	0.32449459	0.32449459	0.32449459	0.32449459	0.32449459	0.32449459	0.32449459	0.32449459	0.32449459
189	0.324491985	0.324491985	0.324491985	0.324491985	0.324491985	0.324491985	0.324491985	0.324491985	0.324491985	0.324491985	0.324491985	0.324491985	0.324491985	0.324491985	0.324491985	0.324491985	0.324491985	0.324491985	0.324491985	0.324491985	0.324491985	0.324491985	0.324491985	0.324491985	0.324491985	0.324491985	0.324491985	0.324491985	0.324491985	0.324491985	0.324491985	0.324491985	0.324491985	0.324491985	0.324491985	0.324491985	0.324491985	0.324491985	0.324491985	0.324491985	0.324491985	0.324491985	0.324491985	0.324491985	0.324491985	0.324491985	0.324491985	0.324491985	0.324491985
190	0.324489785	0.324489785	0.324489785	0.324489785	0.324489785	0.324489785	0.324489785	0.324489785	0.324489785	0.324489785	0.324489785	0.324489785	0.324489785	0.324489785	0.324489785	0.324489785	0.324489785	0.324489785	0.324489785	0.324489785	0.324489785	0.324489785	0.324489785	0.324489785	0.324489785	0.324489785	0.324489785	0.324489785	0.324489785	0.324489785	0.324489785	0.324489785	0.324489785	0.324489785	0.324489785	0.324489785	0.324489785	0.324489785	0.324489785	0.324489785	0.324489785	0.324489785	0.324489785	0.324489785	0.324489785	0.324489785	0.324489785	0.324489785	0.324489785
191	0.324488085	0.324488085	0.324488085	0.324488085	0.324488085	0.324488085	0.324488085	0.324488085	0.324488085	0.324488085	0.324488085	0.324488085	0.324488085	0.324488085	0.324488085	0.324488085	0.324488085	0.324488085	0.324488085	0.324488085	0.324488085	0.324488085	0.324488085	0.324488085	0.324488085	0.324488085	0.324488085	0.324488085	0.324488085	0.324488085	0.324488085	0.324488085	0.324488085	0.324488085	0.324488085	0.324488085	0.324488085	0.324488085	0.324488085	0.324488085	0.324488085	0.324488085	0.324488085	0.324488085	0.324488085	0.324488085	0.324488085	0.324488085	0.324488085
192	0.324486988	0.324486988	0.324486988	0.324486988	0.324486988	0.324486988	0.324486988	0.324486988	0.324486988	0.324486988	0.324486988	0.324486988	0.324486988	0.324486988	0.324486988	0.324486988	0.324486988	0.324486988	0.324486988	0.324486988	0.324486988	0.324486988	0.324486988	0.324486988	0.324486988	0.324486988	0.324486988	0.324486988	0.324486988	0.324486988	0.324486988	0.324486988	0.324486988	0.324486988	0.324486988	0.324486988	0.324486988	0.324486988	0.324486988	0.324486988	0.324486988	0.324486988	0.324486988	0.324486988	0.324486988	0.324486988	0.324486988	0.324486988	0.324486988
193	0.3244866	0.3244866	0.3244866	0.3244866	0.3244866	0.3244866	0.3244866	0.3244866	0.3244866	0.3244866	0.3244866	0.3244866	0.3244866	0.3244866	0.3244866	0.3244866	0.3244866	0.3244866	0.3244866	0.3244866	0.3244866	0.3244866	0.3244866	0.3244866	0.3244866	0.3244866	0.3244866	0.3244866	0.3244866	0.3244866	0.3244866	0.3244866	0.3244866	0.3244866	0.3244866	0.3244866	0.3244866	0.3244866	0.3244866	0.3244866	0.3244866	0.3244866	0.3244866	0.3244866	0.3244866	0.3244866	0.3244866	0.3244866	0.3244866
194	0.324487032	0.324487032	0.324487032	0.324487032	0.324487032	0.324487032	0.324487032	0.324487032	0.324487032	0.324487032	0.324487032	0.324487032	0.324487032	0.324487032	0.324487032	0.324487032	0.324487032	0.324487032	0.324487032	0.324487032	0.324487032	0.324487032	0.324487032	0.324487032	0.324487032	0.324487032	0.324487032	0.324487032	0.324487032	0.324487032	0.324487032	0.324487032	0.324487032	0.324487032	0.324487032	0.324487032	0.324487032	0.324487032	0.324487032	0.324487032	0.324487032	0.324487032	0.324487032	0.324487032	0.324487032	0.324487032	0.324487032	0.324487032	0.324487032
195	0.324488198	0.324488198	0.324488198	0.324488198	0.324488198	0.324488198	0.324488198	0.324488198	0.324488198	0.324488198	0.324488198	0.324488198	0.324488198	0.324488198	0.324488198	0.324488198	0.324488198	0.324488198	0.324488198	0.324488198	0.324488198	0.324488198	0.324488198	0.324488198	0.324488198	0.324488198	0.324488198	0.324488198	0.324488198	0.324488198	0.324488198	0.324488198	0.324488198	0.324488198	0.324488198	0.324488198	0.324488198	0.324488198	0.324488198	0.324488198	0.324488198	0.324488198	0.324488198	0.324488198	0.324488198	0.324488198	0.324488198	0.324488198	0.324488198
196	0.324489708	0.324489708	0.324489708	0.324489708	0.324489708	0.324489708	0.324489708	0.324489708	0.324489708	0.324489708	0.324489708	0.324489708	0.324489708	0.324489708	0.324489708	0.324489708	0.324489708	0.324489708	0.324489708	0.324489708	0.324489708	0.324489708	0.324489708	0.324489708	0.324489708	0.324489708	0.324489708	0.324489708	0.324489708	0.324489708	0.324489708	0.324489708	0.324489708	0.324489708	0.324489708	0.324489708	0.324489708	0.324489708	0.324489708	0.324489708	0.324489708	0.324489708	0.324489708	0.324489708	0.324489708	0.324489708	0.324489708	0.324489708	0.324489708
197	0.324491511	0.324491511	0.324491511	0.324491511	0.324491511	0.324491511	0.324491511	0.324491511	0.324491511	0.324491511	0.324491511	0.324491511	0.324491511	0.324491511	0.324491511	0.324491511	0.324491511	0.324491511	0.324491511	0.324491511	0.324491511	0.324491511	0.324491511	0.324491511	0.324491511	0.324491511	0.324491511	0.324491511	0.324491511	0.324491511	0.324491511	0.324491511	0.324491511	0.324491511	0.324491511	0.324491511	0.324491511	0.324491511	0.324491511	0.324491511	0.324491511	0.324491511	0.324491511	0.324491511	0.324491511	0.324491511	0.324491511	0.324491511	0.324491511
198	0.324493389	0.324493389	0.324493389	0.324493389	0.324493389	0.324493389	0.324493389	0.324493389	0.324493389	0.324493389	0.324493389	0.324493389	0.324493389	0.324493389	0.324493389	0.324493389	0.324493389	0.324493389	0.324493389	0.324493389	0.324493389	0.324493389	0.324493389	0.324493389	0.324493389	0.324493389	0.324493389	0.324493389	0.324493389	0.324493389	0.324493389	0.324493389	0.324493389	0.324493389	0.324493389	0.324493389	0.324493389	0.324493389	0.324493389	0.324493389	0.324493389	0.324493389	0.324493389	0.324493389	0.324493389	0.324493389	0.324493389	0.324493389	0.324493389
199	0.324495234	0.324495234	0.324495234	0.324495234	0.324495234	0.324495234	0.324495234	0.324495234	0.324495234	0.324495234	0.324495234	0.324495234	0.324495234	0.324495234	0.324495234	0.324495234	0.324495234	0.324495234	0.324495234	0.324495234	0.324495234	0.324495234	0.324495234	0.324495234	0.324495234	0.324495234	0.324495234	0.324495234	0.324495234	0.324495234	0.324495234	0.324495234	0.324495234	0.324495234	0.324495234	0.324495234	0.324495234	0.324495234	0.324495234	0.324495234	0.324495234	0.324495234	0.324495234	0.324495234	0.324495234	0.324495234	0.324495234	0.324495234	0.324495234
200	0.324497129	0.324497129	0.324497129	0.324497129	0.324497129	0.324497129	0.324497129	0.324497129	0.324497129	0.324497129	0.324497129	0.324497129	0.324497129	0.324497129	0.324497129	0.324497129	0.324497129	0.324497129	0.324497129	0.324497129	0.324497129	0.324497129	0.324497129	0.324497129	0.324497129	0.324497129	0.324497129	0.324497129	0.324497129	0.324497129	0.324497129	0.324497129	0.324497129	0.324497129	0.324497129	0.324497129	0.324497129	0.324497129	0.324497129	0.324497129	0.324497129	0.324497129	0.324497129	0.324497129	0.324497129	0.324497129	0.324497129	0.324497129	0.324497129
201	0.326732747	0.326989114	0.327006527	0.326807051	0.326679365	0.327143064	0.327100988	0.326937586	0.326593884	0.327237696	0.327242442	0.326839685	0.327062858	0.327115884	0.327350987	0.327579493	0.327360269	0.327647611	0.327310829	0.327161093	0.3277586	0.327593852	0.327815176	0.327276569	0.327419172	0.327159972	0.328192659	0.328343356	0.32826727	0.328410886	0.327783375	0.328355919	0.32762292	0.327356367	0.327554801	0.327519654	0.32735755	0.327674819	0.328154396	0.328275288	0.327975986	0.328092269	0.328109677	0.327946178	0.329133059	0.328335868	0.328355249	0.328430112	0.328103838
202	0.340126183	0.341628492	0.341782778	0.340641367	0.339917646	0.342172487	0.342166461	0.341175418	0.338980734	0.343225312	0.343240779	0.341280101	0.342220456	0.343036189	0.344830185	0.345555143	0.344345712	0.346016804	0.343818742	0.343410747	0.346880252	0.346479456	0.347664242	0.343990949	0.344852121	0.343478241	0.350304196	0.351494865	0.350946727	0.35270662	0.348300384	0.352117298	0.346023976	0.344507246	0.345618511	0.345461363	0.344482929	0.34661382	0.350104774	0.351270865	0.349369417	0.350031482	0.350801104	0.348813343	0.356376819	0.352216954	0.352052678	0.352705797	0.350920224
203	0.364905488	0.368532428	0.36905786	0.366222019	0.364481793	0.369610433	0.369790217	0.367178688	0.361628746	0.372728456	0.372791052	0.36844594	0.370529967	0.3730707	0.378123809	0.378946339	0.376025661	0.380246155	0.374461451	0.37405315	0.382777567	0.382491945	0.385466053	0.375387571	0.377560777	0.374332303	0.392819588	0.396440908	0.394891743	0.400776128	0.388204805	0.398885508	0.380490067	0.376746051	0.379548051	0.379031574	0.376712376	0.382379368	0.392722918	0.395778183	0.391096373	0.392887232	0.395844957	0.388816719	0.409777235	0.399545686	0.39869328	0.400539584	0.396162369
204	0.399072426	0.405719704	0.406926179	0.401575804	0.398441685	0.407447354	0.408099471	0.402735362	0.392455483	0.414028813	0.414200884	0.406610695	0.410349064	0.415724069	0.426163587	0.426197244	0.420835578	0.428895527	0.417521924	0.417567003	0.434275981	0.434747053	0.440525642	0.419935167	0.424028385	0.418294792	0.455786148	0.463933265	0.4605743	0.474433982	0.44760299	0.470041182	0.429707313	0.422627239	0.428117262	0.426818503	0.422723827	0.433915204	0.456519476	0.462116874	0.453606732	0.457301535	0.464624793	0.447566386	0.491652348	0.472083713	0.469599122	0.473421684	0.465163118
205	0.442260935	0.452972081	0.455295963	0.446427479	0.441497249	0.455413528	0.457018697	0.447287261	0.430795556	0.467400993	0.467776268	0.455973212	0.461982861	0.471692247	0.490433038	0.488038546	0.479430411	0.492890957	0.473379731	0.474658278	0.50273902	0.505122175	0.515011625	0.478348219	0.485066524	0.4761986	0.542501862	0.558262687	0.551918095	0.579534062	0.530009507	0.570872041	0.494802693	0.48302625	0.492539085	0.489782278	0.483530679	0.502793097	0.545478476	0.554008557	0.540871482	0.547519321	0.56258346	0.527753436	0.607989304	0.575678208	0.569973268	0.576764353	0.563263313
206	0.495257885	0.511166513	0.515198732	0.501649289	0.494514037	0.514282278	0.517554263	0.501290807	0.477026642	0.534196827	0.534914	0.518037764	0.527015024	0.542967921	0.573545217	0.56601078	0.553473767	0.573912411	0.543476881	0.547212436	0.590155416	0.596253278	0.611541058	0.55244345	0.56246887	0.550064666	0.655464007	0.681890112	0.671517	0.718125563	0.63906284	0.703887971	0.577690639	0.559877072	0.57492311	0.569741173	0.561218299	0.591278787	0.662912543	0.673629818	0.656528734	0.667027536	0.693330018	0.632031895	0.757249545	0.712894907	0.702342742	0.71256645	0.693762819
207	0.558601487	0.580513441	0.586885318	0.567711513	0.55811681	0.584055801	0.589849596	0.564716667	0.531513587	0.614313857	0.615545992	0.593568051	0.6060067	0.629826785	0.674402027	0.658522074	0.642229971	0.669981664	0.627442067	0.635072433	0.693602931	0.70513748	0.725563311	0.641731303	0.655149888	0.639696959	0.78400779	0.819017834	0.80583024	0.865028006	0.767183089	0.848215153	0.676333272	0.652388817	0.673601	0.665108371	0.655006864	0.696504428	0.797409909	0.807038154	0.790381279	0.803589793	0.838537453	0.753347706	0.903081863	0.860150805	0.846293615	0.857655744	0.838120011
208	0.630518191	0.657894297	0.666840473	0.642340263	0.630567858	0.661303581	0.670150388	0.63507015	0.593284634	0.702029766	0.703895315	0.678970556	0.694383892	0.725252353	0.779541604	0.754718577	0.736930411	0.76862985	0.71835836	0.730391797	0.79680546	0.812889347	0.834167566	0.737591	0.752782699	0.736639289	0.89147978	0.923196036	0.91208932	0.960379994	0.880524629	0.948675222	0.777233038	0.750606494	0.775417271	0.764053503	0.7544467	0.801353807	0.907784824	0.912017475	0.902618301	0.913810342	0.94366247	0.862517116	0.981984095	0.958180532	0.947274705	0.954958818	0.942482828
209	0.704142688	0.733772038	0.744385941	0.717502982	0.704865512	0.736262878	0.74747276	0.705153275	0.658253851	0.782198837	0.784577354	0.761798441	0.777777367	0.809914983	0.860298547	0.83225965	0.817296987	0.845339517	0.79899772	0.813291757	0.87071728	0.886435888	0.902012465	0.819359391	0.832722774	0.819808165	0.939864548	0.9584297	0.952675971	0.977306731	0.937305571	0.973061682	0.854090979	0.831857832	0.853764782	0.842291012	0.835863863	0.875322778	0.953316363	0.952061314	0.951215864	0.956922335	0.972412399	0.921787047	0.983405213	0.977573859	0.972557057	0.975332987	0.971165484
210	0.766690209	0.792919259	0.803005539	0.779117821	0.767879035	0.793929979	0.805231757	0.76310197	0.718075672	0.835143981	0.837614716	0.822440113	0.835363651	0.860450588	0.893886653	0.870871267	0.861972913	0.880027762	0.848765611	0.861216346	0.896767536	0.90772011	0.915321607	0.864871324	0.873365345	0.866200267	0.931665292	0.938796445	0.937176835	0.944864555	0.934449514	0.945070142	0.886599007	0.873820151	0.887434324	0.878909764	0.876648835	0.899875916	0.94048082	0.936663463	0.940440888	0.941840397	0.94649309	0.924456493	0.943274704	0.946242849	0.945131032	0.945051561	0.94544717
211	0.804825931	0.822801294	0.830232293	0.813865415	0.805994644	0.822418629	0.831325618	0.797571013	0.762060499	0.851090412	0.853214757	0.847265341	0.855020466	0.869030717	0.883778291	0.869141714	0.866138953	0.873847042	0.859707745	0.86773077	0.881841455	0.887608109	0.889369475	0.86904153	0.872501477	0.870473493	0.891762062	0.892307849	0.892903021	0.891665521	0.896728971	0.893958458	0.877615415	0.873690513	0.87891238	0.874124133	0.874918238	0.883238526	0.897123494	0.892625306	0.898032965	0.897189077	0.896145816	0.891208367	0.886844465	0.893423918	0.894287997	0.892906986	0.895268489
212	0.813154379	0.821708871	0.825769351	0.817898877	0.813898587	0.820479697	0.825902545	0.804453054	0.782568007	0.835241455	0.836834095	0.837976721	0.840967495	0.845382994	0.846752028	0.83933939	0.840300494	0.840702575	0.839351393	0.842995573	0.842557935	0.844574126	0.842984298	0.84275816	0.84270637	0.843881751	0.837689949	0.834725465	0.83643647	0.830673189	0.843298649	0.833905241	0.842254439	0.844099945	0.843571873	0.841700991	0.844070567	0.842707554	0.840829928	0.836371205	0.842126213	0.840206713	0.836303261	0.840706441	0.82467507	0.832510304	0.834357121	0.832420501	0.835540506
213	0.795991125	0.796898305	0.798064516	0.797034326	0.796190858	0.795352057	0.797567965	0.78775505	0.778975674	0.798918769	0.800005749	0.805401994	0.80507162	0.80299706	0.796128132	0.793902662	0.797149083	0.793083081	0.799813038	0.80017524	0.791059831	0.790591574	0.787154198	0.799076883	0.796927723	0.799808467	0.777678321	0.772833222	0.775098868	0.767057632	0.783250375	0.770671695	0.793117452	0.798266543	0.794288869	0.794387226	0.797414776	0.790387624	0.77936042	0.775217949	0.78077774	0.778362255	0.773028515	0.782594623	0.760872044	0.768840072	0.771175809	0.769044716	0.77234259
214	0.761326281	0.7569925	0.756043895	0.759725403	0.761044207	0.755448174	0.75518689	0.754532795	0.755978465	0.751062712	0.751732711	0.75938861	0.756972335	0.750819092	0.739014728	0.740428934	0.744913235	0.738217993	0.749822251	0.747895025	0.733774847	0.731647354	0.727221125	0.746353152	0.743008645	0.746716857	0.715543389	0.70971504	0.712234882	0.703109504	0.720746776	0.706822251	0.737229759	0.744188981	0.738201058	0.739607737	0.742814128	0.732556746	0.716229633	0.712520845	0.717631028	0.715026393	0.709017578	0.721425706	0.697240044	0.70477315	0.707343383	0.705201434	0.708381363
215	0.716104556	0.708418364	0.705997118	0.712753855	0.715448042	0.707027432	0.704950146	0.711043119	0.719643635	0.69715322	0.697489038	0.706245143	0.702541892	0.693826741	0.679056099	0.68309024	0.688199994	0.679983536	0.694498354	0.690962269	0.674015796	0.670741489	0.665822453	0.689213683	0.685208102	0.689249796	0.653073328	0.646764444	0.649372541	0.639823498	0.657733567	0.643477663	0.678289978	0.686191125	0.679045774	0.681341692	0.684476245	0.672421988	0.653034164	0.649815325	0.654346277	0.651719809	0.645449726	0.659392948	0.634549726	0.64133223	0.643996505	0.641944249	0.644844408
216	0.664726283	0.654930714	0.651475989	0.660228946	0.663781315	0.653764414	0.65034324	0.661406937	0.674855272	0.640062999	0.640127287	0.649295212	0.644806201	0.634483829	0.617978394	0.623961622	0.629318105	0.620277698	0.636464602	0.631767707	0.613354693	0.609261363	0.60415461	0.629956736	0.625623015	0.629697702	0.591028808	0.584550061	0.58714367	0.577582988	0.595040295	0.581076984	0.61808506	0.626392095	0.618621078	0.621535331	0.624452136	0.611494568	0.590431991	0.587735911	0.591611057	0.589065103	0.582791526	0.597461283	0.57307372	0.57891309	0.581580961	0.579680876	0.582203065
217	0.609989109	0.598899985	0.59471162	0.604746756	0.608818458	0.597989908	0.593557844	0.608319279	0.624988009	0.58158838	0.581427713	0.590591773	0.585638398	0.574319921	0.556850834	0.564337839	0.569708235	0.560281085	0.577357294	0.571798769	0.552763128	0.548062842	0.542953303	0.570012787	0.56555755	0.569485309	0.529873769	0.523415966	0.525932274	0.516612779	0.533179177	0.519882121	0.557723935	0.566108142	0.55804246	0.561399275	0.564016664	0.550709012	0.528825693	0.52666571	0.529848109	0.527443744	0.521326564	0.536222348	0.512951134	0.517750537	0.520362893	0.518650818	0.52074416
218	0.553608298	0.541765608	0.537051126	0.547890233	0.552258152	0.54112259	0.535916888	0.55346719	0.572235232	0.522797452	0.522445972	0.531351833	0.526143371	0.51423161	0.496301806	0.504978754	0.510218383	0.500684761	0.518140745	0.511930032	0.492808845	0.487650966	0.482653755	0.510221455	0.505775063	0.509450147	0.469886408	0.46357147	0.465971007	0.457051733	0.47246528	0.46005451	0.497855677	0.506109721	0.497963818	0.501643147	0.503918077	0.490614265	0.468461051	0.466832919	0.469317371	0.467090444	0.461233156	0.476029007	0.45425452	0.457991404	0.460506004	0.45899977	0.46064913
219	0.496586515	0.484368615	0.479282344	0.490584127	0.495094299	0.483992233	0.478194398	0.497853004	0.517932145	0.464320867	0.463804983	0.47228503	0.466968163	0.454758745	0.436742399	0.44635025	0.451362679	0.441920272	0.459386167	0.452691683	0.433863396	0.428374934	0.423569546	0.451092737	0.446744744	0.450105109	0.411302795	0.405220588	0.407475285	0.399069039	0.413166458	0.401775588	0.438893209	0.446871751	0.438803483	0.442710394	0.444623494	0.431576938	0.409563201	0.408444966	0.410254382	0.408226508	0.402705957	0.417155099	0.397099375	0.399811734	0.40219257	0.400898025	0.402116569
220	0.439634964	0.427330535	0.422001898	0.433497506	0.438036319	0.427210979	0.420978798	0.442181289	0.462982876	0.406680586	0.40602385	0.413957597	0.40864707	0.396392704	0.378621252	0.388899972	0.393614537	0.384423815	0.401586447	0.394570779	0.376344063	0.370657341	0.366107967	0.393101368	0.388921421	0.391933126	0.354502306	0.348734928	0.350820392	0.343024569	0.355693583	0.345411477	0.381270486	0.388856117	0.381002944	0.385046558	0.386596361	0.37401873	0.35251551	0.351865979	0.353050877	0.351236087	0.346121266	0.359994507	0.34179899	0.343578017	0.345788722	0.344703356	0.345528444
221	0.383479648	0.371348375	0.365909456	0.377345358	0.381815738	0.371464324	0.364965545	0.387145276	0.408164177	0.350578767	0.349808068	0.357093993	0.351899202	0.339866291	0.322702854	0.333335872	0.337689786	0.32891358	0.345444061	0.33829818	0.320988605	0.315267245	0.311040738	0.336971895	0.333027299	0.335673054	0.300273126	0.294916239	0.296805339	0.289727173	0.300867702	0.291774187	0.325719487	0.332794996	0.325304805	0.329377999	0.330578512	0.318689931	0.298124781	0.297881637	0.298519939	0.296930209	0.29229672	0.305329017	0.289124601	0.290106139	0.292106151	0.291222111	0.291710516
222	0.328960807	0.317262608	0.311862274	0.322972017	0.327282009	0.317579377	0.311009457	0.333534928	0.354296496	0.296914176	0.296063308	0.302606283	0.297644447	0.286140556	0.270014908	0.280601972	0.28453178	0.276354646	0.291873488	0.284833496	0.26880065	0.263251244	0.25942558	0.283660597	0.280024854	0.282298346	0.249708909	0.24488005	0.246540667	0.240305955	0.24981559	0.241996144	0.27322695	0.279662449	0.272707887	0.276677407	0.277557124	0.266609822	0.247509967	0.247589352	0.247785475	0.246432912	0.242367292	0.254236794	0.240174762	0.240532625	0.242277142	0.241582523	0.241806877
223	0.277341954	0.266378061	0.26119839	0.271666536	0.275711526	0.266845554	0.260448285	0.282533845	0.302501379	0.247104745	0.246218758	0.251921291	0.247330049	0.236715596	0.222114625	0.232180818	0.235619237	0.22825166	0.242323579	0.235671962	0.221320017	0.21617658	0.21283454	0.234662298	0.231417858	0.233317836	0.204388433	0.20020477	0.201607946	0.196329381	0.204139882	0.197660096	0.225316954	0.230973155	0.224745991	0.228455328	0.22905526	0.219325167	0.202265498	0.202569345	0.202444289	0.201336516	0.197913263	0.208295516	0.196511493	0.19643297	0.19788664	0.1973647	0.197402384
224	0.229858555	0.219952864	0.215198393	0.224680247	0.228349561	0.22050745	0.214561167	0.235309043	0.253908115	0.202479351	0.201611726	0.206384329	0.202311208	0.192973152	0.180403389	0.189429952	0.192313229	0.185973453	0.198141775	0.192189237	0.179931336	0.175440352	0.172661449	0.191350217	0.188580763	0.190114453	0.165692778	0.162262215	0.163384553	0.15915285	0.165241113	0.160135931	0.183369103	0.18811021	0.182805973	0.186086205	0.186459531	0.178222423	0.163780512	0.164199757	0.163887888	0.16302642	0.160302776	0.168893842	0.159485259	0.159168527	0.160306803	0.159935747	0.159868182
225	0.188290194	0.179771842	0.17564817	0.183799764	0.186977711	0.180341428	0.17513085	0.193575333	0.210154736	0.1647941	0.164001232	0.167793891	0.164370054	0.156625561	0.146436257	0.154008234	0.15630292	0.151145037	0.161072714	0.15608096	0.146186661	0.142518435	0.140334882	0.155413396	0.153174823	0.154363191	0.134910528	0.132260166	0.133106323	0.129904834	0.134393246	0.130583956	0.14897824	0.152732526	0.148475435	0.1511966	0.151403817	0.144819808	0.133304303	0.133744553	0.133363642	0.132730208	0.130689239	0.137386547	0.130264742	0.129868283	0.13070407	0.130455299	0.130347003
226	0.154092732	0.147173264	0.143815465	0.150421638	0.153030645	0.147693976	0.143416048	0.158822621	0.172835196	0.135096527	0.134419771	0.137270356	0.134552171	0.128509346	0.120722901	0.126683262	0.128416498	0.124447814	0.13208322	0.128165027	0.120607055	0.117789943	0.116159845	0.12765571	0.125942014	0.126829068	0.112148522	0.11020159	0.110808405	0.108498713	0.111660076	0.108941512	0.122753437	0.125565027	0.122341585	0.124464732	0.12456476	0.119582507	0.110873722	0.111274486	0.110904062	0.110459627	0.109003956	0.113970463	0.108816826	0.108438746	0.109020893	0.10886219	0.108753456
227	0.127858103	0.122513435	0.119922719	0.12501196	0.127056123	0.122948064	0.119626348	0.13180207	0.143041096	0.11324701	0.11269757	0.114751005	0.112682467	0.108170658	0.102443462	0.106948096	0.108213726	0.105269181	0.110906389	0.107975383	0.102397756	0.100311834	0.099126968	0.107595579	0.106329042	0.106980209	0.096235237	0.094837699	0.095262673	0.093629465	0.095813928	0.093908071	0.103995811	0.106027991	0.103676835	0.105270252	0.105309871	0.101660865	0.095248046	0.095589559	0.095262168	0.094956902	0.093940968	0.097544253	0.09388722	0.093562985	0.093958536	0.09386042	0.093766892
228	0.108966331	0.104956486	0.103018376	0.106830432	0.108392291	0.105297897	0.102801834	0.112098336	0.120783516	0.098021385	0.097584612	0.099038955	0.097488286	0.094173984	0.090001972	0.093369299	0.094287903	0.092121203	0.096228301	0.094079658	0.089988403	0.088454756	0.087592423	0.093794891	0.092865277	0.093349204	0.085504479	0.084498291	0.084796006	0.083635874	0.085152654	0.083807069	0.09117416	0.092631861	0.090932616	0.092117186	0.092126888	0.089465426	0.084735494	0.08502183	0.084740913	0.084530749	0.083819685	0.086447511	0.083838738	0.083570216	0.083838326	0.083779009	0.083703104
229	0.096001739	0.092999588	0.091555517	0.094407805	0.095603907	0.093260047	0.091395518	0.098439527	0.105070357	0.087801167	0.087451841	0.088489415	0.087313885	0.084859147	0.081784714	0.084329947	0.085007473	0.083390948	0.086411405	0.084830473	0.081783994	0.080642853	0.080003971	0.084611048	0.083918125	0.084290017	0.078472439	0.077737316	0.07794773	0.077112216	0.078179237	0.07721298	0.082678639	0.083737503	0.082495447	0.08338679	0.083383108	0.081411404	0.077860202	0.078102453	0.077860972	0.077714818	0.077211598	0.079162689	0.077270852	0.07704963	0.077231485	0.07719713	0.077136921
230	0.087412482	0.085124362	0.08403288	0.08620505	0.087141777	0.085321893	0.083911399	0.089318196	0.094439645	0.081156821	0.08087144	0.081625677	0.080711961	0.078857761	0.076548901	0.078510741	0.07902285	0.077789389	0.080052619	0.07887236	0.076552253	0.075688398	0.075204949	0.078697293	0.078168215	0.078465503	0.074061964	0.073517028	0.0736665	0.073057681	0.073815278	0.073110765	0.07724314	0.078026834	0.077102613	0.077786897	0.077777713	0.07628514	0.07356212	0.073770559	0.073560383	0.073458244	0.073099573	0.074575725	0.073181536	0.072998504	0.073120538	0.07310276	0.073055628
231	0.081933912	0.080144797	0.079302349	0.080997515	0.08175333	0.080295338	0.079207188	0.083449581	0.087504169	0.077045485	0.07680637	0.077365571	0.076635257	0.07520406	0.073436224	0.074980499	0.075377435	0.074413842	0.076143651	0.075248046	0.073439767	0.072774183	0.072400594	0.075103566	0.074689391	0.074936032	0.071533145	0.071123554	0.071229837	0.07078165	0.071322676	0.070801854	0.073986185	0.074576983	0.073876897	0.07441349	0.074402464	0.073247683	0.071114625	0.071297352	0.071111542	0.071040219	0.070783667	0.071921773	0.070878572	0.070725639	0.07080554	0.070799008	0.070762395
232	0.078660967	0.077223634	0.0765585	0.077916067	0.078544685	0.077339356	0.076481596	0.079892871	0.083195711	0.074742289	0.074536776	0.074959704	0.074359341	0.073229144	0.071846647	0.073090498	0.073406344	0.072634566	0.073985119	0.073293373	0.071848766	0.071325471	0.071029928	0.073170266	0.072837471	0.073049212	0.070358478	0.070045296	0.070120942	0.069786663	0.070175689	0.069784177	0.072292074	0.072746427	0.072205654	0.072636291	0.072625151	0.071710275	0.069998762	0.070162191	0.069994954	0.069945277	0.069760916	0.070658146	0.06986335	0.069733365	0.069783626	0.069784777	0.069756269
233	0.076963347	0.075775435	0.075236936	0.076354515	0.07689312	0.075865463	0.075172769	0.077988709	0.080758458	0.073734858	0.073553712	0.073881176	0.073373062	0.072456924	0.071348164	0.072376754	0.072635495	0.071999872	0.073081142	0.072535057	0.071348417	0.07092672	0.070686489	0.072426932	0.072151737	0.072339309	0.070154056	0.069909331	0.069963303	0.069709649	0.069991954	0.069691515	0.07171831	0.072076311	0.071648488	0.07200339	0.071992876	0.071247991	0.069836649	0.069985855	0.069832418	0.069797946	0.069664495	0.07039064	0.069771697	0.069658542	0.069688027	0.069694481	0.069671926
234	0.076391782	0.075380276	0.074931818	0.075879368	0.076354366	0.075451535	0.074876529	0.077267576	0.079659192	0.073652756	0.073489188	0.073749918	0.073307095	0.072542574	0.071627724	0.072502739	0.072721278	0.072182117	0.073072786	0.072630208	0.071626315	0.07127693	0.071075972	0.072532624	0.072298148	0.072468848	0.070642393	0.070446453	0.070485019	0.070288787	0.070495448	0.070259762	0.071943978	0.072234018	0.071886089	0.072187048	0.072177331	0.071552803	0.070355465	0.070494341	0.070350922	0.070327225	0.070229869	0.07083408	0.070340689	0.070239371	0.070254233	0.070264441	0.070246028
235	0.076620606	0.075733587	0.075348939	0.076176286	0.07660638	0.075791301	0.075299859	0.077388949	0.079513348	0.074228082	0.074077186	0.074291066	0.073894563	0.073237598	0.072460675	0.073225932	0.07341594	0.072945488	0.073700811	0.073331739	0.07245813	0.07216038	0.071987603	0.073241681	0.073036179	0.073194834	0.07162508	0.071464303	0.071491783	0.071337041	0.071489035	0.0713003	0.072738376	0.072980161	0.072689015	0.072951438	0.072942377	0.072403671	0.071360306	0.071491771	0.071355452	0.071339532	0.071268111	0.07178443	0.071382355	0.071288879	0.071293341	0.071306318	0.071290564
236	0.077428011	0.076628449	0.076288746	0.077031494	0.07742997	0.076676542	0.076244023	0.078120033	0.080057108	0.075279756	0.075137971	0.075318898	0.074955269	0.074374452	0.073695561	0.074382648	0.074552306	0.074130879	0.074790162	0.074473018	0.073692512	0.073431502	0.073279057	0.074388414	0.074203598	0.074353448	0.072967853	0.072832537	0.072851997	0.072727477	0.072839387	0.072685213	0.073945879	0.074153328	0.07390253	0.074137484	0.074128809	0.073651447	0.072719216	0.072845508	0.072713995	0.072703767	0.072651094	0.073103767	0.072769096	0.072680196	0.072677254	0.072692367	0.072678033
237	0.078626858	0.077890172	0.077582716	0.078264597	0.078640213	0.077931456	0.077541163	0.079264266	0.081067484	0.076654597	0.076519485	0.07667643	0.076336789	0.075811169	0.075203705	0.075834082	0.075988695	0.07560327	0.076192643	0.075912835	0.075200853	0.074966484	0.074829203	0.075832381	0.075662809	0.075805803	0.07455628	0.074439995	0.07445345	0.074351784	0.074432858	0.074305365	0.075434352	0.075616608	0.075395242	0.075610196	0.075601548	0.07516935	0.074319681	0.074442473	0.074313988	0.074308125	0.074269497	0.074674619	0.074392041	0.074305062	0.074296687	0.074313591	0.074299649
238	0.080100333	0.079409613	0.079125539	0.07976297	0.080121716	0.07944614	0.079086363	0.080698611	0.082404751	0.078256682	0.078126503	0.078265536	0.077943731	0.077458662	0.076903976	0.07749295	0.07763614	0.07727766	0.077815344	0.077562553	0.076902003	0.076687074	0.076561378	0.077485381	0.077327292	0.077464672	0.076317686	0.076215963	0.076224799	0.076140948	0.076197288	0.076091254	0.077120541	0.077283921	0.077084363	0.077284616	0.077275628	0.076877335	0.076090167	0.076210783	0.076083877	0.076081502	0.076053699	0.076422501	0.076181811	0.076094502	0.076082048	0.076100571	0.076086135
239	0.081772292	0.081115385	0.080848244	0.081453085	0.081799253	0.081148704	0.080810887	0.082342876	0.083978231	0.080022921	0.079896372	0.080021773	0.079713343	0.079258154	0.07874267	0.079301594	0.07943593	0.079097843	0.079597052	0.079363685	0.078742219	0.078541409	0.078424743	0.079289191	0.079139885	0.079272468	0.078203836	0.078113498	0.078118682	0.078049151	0.078084791	0.07799674	0.078949362	0.079098391	0.078915119	0.079104576	0.079094894	0.078722383	0.077983182	0.078102714	0.077976154	0.077976686	0.077957466	0.078297991	0.078092339	0.07800272	0.077987136	0.078007217	0.077991503
240	0.083589965	0.082957929	0.082702926	0.083283939	0.08362069	0.082989234	0.082666991	0.08414153	0.085725429	0.081909458	0.081785542	0.081900352	0.081602003	0.081168803	0.08068254	0.081219958	0.081347274	0.081024795	0.081495212	0.0812756	0.080684228	0.080493562	0.080384103	0.081203362	0.081060881	0.081189196	0.080181413	0.08010022	0.080102416	0.080044832	0.080062307	0.079990027	0.080882589	0.081020518	0.080849502	0.081031081	0.081020359	0.080667733	0.079965945	0.080085323	0.07995803	0.079961102	0.079948935	0.080266915	0.08009189	0.079998173	0.079980113	0.080001772	0.079984067
241	0.085509658	0.084896246	0.084649977	0.085213318	0.08554286	0.084926434	0.084615199	0.086048571	0.087594557	0.083880105	0.083758078	0.083864292	0.083573715	0.083156965	0.082692986	0.083215068	0.083336571	0.08302641	0.083474735	0.083264833	0.082697407	0.082514047	0.082410596	0.083194586	0.083057599	0.083181928	0.082223144	0.082149651	0.082149266	0.082102208	0.082102775	0.082045132	0.08288879	0.083017796	0.082856267	0.083032048	0.083019952	0.082683199	0.082011638	0.082131653	0.082002677	0.082008105	0.082002066	0.082301273	0.082154544	0.082055094	0.082034958	0.08205829	0.082037934
242	0.087505594	0.086906169	0.086666074	0.087216333	0.087540313	0.086935957	0.086632272	0.088036836	0.089555081	0.085913623	0.085792905	0.08589187	0.08560736	0.085202973	0.084756244	0.085267678	0.085384186	0.085083986	0.085515061	0.085311832	0.084763982	0.084585806	0.084487557	0.085243405	0.085110978	0.085231447	0.084313377	0.08424665	0.084243925	0.08420659	0.084190676	0.084147236	0.084949684	0.08507127	0.084917249	0.085088789	0.085074989	0.08475128	0.0841049	0.08422626	0.084094725	0.084102443	0.084101994	0.084384951	0.084265542	0.084158801	0.084136829	0.084161977	0.08413834
243	0.089554811	0.088966232	0.088730528	0.089270841	0.08959038	0.08899617	0.088697596	0.090082095	0.09157964	0.087991245	0.087871396	0.087963865	0.087684272	0.087289495	0.086856711	0.087360839	0.087472814	0.087181072	0.087598043	0.087399365	0.086868348	0.086693874	0.086600381	0.08733268	0.087204235	0.087320827	0.086438426	0.08637799	0.086373016	0.086345163	0.086312434	0.086283406	0.087049202	0.087164256	0.087016481	0.087184863	0.08716903	0.086856614	0.086232306	0.086355648	0.08622074	0.08623079	0.086235747	0.086503841	0.086412018	0.086296483	0.086272772	0.086299923	0.086272392
244	0.091641466	0.091061667	0.090829128	0.091361589	0.091677432	0.091092188	0.090797012	0.092167585	0.093649202	0.090100134	0.089980821	0.090067119	0.089791693	0.089404723	0.088983818	0.089483026	0.08959067	0.089306495	0.089711294	0.089515699	0.08899994	0.088828148	0.088739225	0.089450741	0.089325962	0.089438551	0.088589124	0.088534844	0.088527601	0.08850941	0.088458954	0.088445035	0.089176446	0.089285412	0.089143137	0.089309106	0.089290906	0.08898881	0.088384879	0.088510795	0.088371735	0.088384242	0.088394684	0.088648463	0.088585444	0.088459626	0.088434164	0.088463546	0.08843151
245	0.093754863	0.093182563	0.092952368	0.093478312	0.093790925	0.093214014	0.092921057	0.094281941	0.095750771	0.092231794	0.092112762	0.0921929	0.091921185	0.091540918	0.091130738	0.091626709	0.09173003	0.091452988	0.091846653	0.091653145	0.091151942	0.090982148	0.090897807	0.091589954	0.091468714	0.091577089	0.090759695	0.090711696	0.090702078	0.090694052	0.090624503	0.090626774	0.091324349	0.091427344	0.091290203	0.091454252	0.091433349	0.091141179	0.090556986	0.090686037	0.090542065	0.090557218	0.090573424	0.090812807	0.090780553	0.09064295	0.090615645	0.090647517	0.090610358
246	0.095894102	0.095328234	0.095099667	0.095620221	0.095929992	0.095360944	0.095069161	0.096424098	0.097882832	0.094385918	0.094266932	0.094340819	0.094072448	0.093697969	0.093297623	0.093791861	0.093890801	0.093620602	0.094003909	0.09381161	0.09332454	0.093156147	0.093076474	0.093750244	0.093632484	0.093736391	0.092950682	0.092909192	0.092897058	0.092899853	0.092809606	0.092829351	0.093493015	0.09359005	0.093457789	0.093620345	0.093596386	0.093313933	0.092749218	0.09288198	0.092732309	0.092750329	0.092772667	0.092997319	0.092998192	0.092847211	0.092817938	0.092852585	0.092809644
247	0.0980531	0.097493113	0.097265721	0.097781516	0.098088646	0.097527361	0.097236048	0.098587548	0.100037802	0.096557862	0.096438738	0.096506071	0.096240871	0.095871724	0.095480929	0.095974483	0.09606885	0.09580551	0.096178642	0.095986976	0.095514211	0.095346842	0.095272062	0.095927534	0.095813323	0.095912441	0.095159284	0.095124717	0.095109863	0.095124382	0.095011473	0.095050278	0.095678749	0.095769609	0.095642231	0.095803556	0.095776176	0.09550363	0.094958874	0.095095912	0.094939749	0.09496091	0.094989896	0.095199026	0.095235977	0.095069972	0.095038548	0.095076283	0.095026877
248	0.100235272	0.099680586	0.099453887	0.099965586	0.10027028	0.099716669	0.099425077	0.100775786	0.102219247	0.098750939	0.098631489	0.098691948	0.098429749	0.098065459	0.097683928	0.098177893	0.098267472	0.098011031	0.098374166	0.098182519	0.097724283	0.097557543	0.097487911	0.098125111	0.098014534	0.098108508	0.097388928	0.097361756	0.097343955	0.097371205	0.097233471	0.097293091	0.097884862	0.097969311	0.097846823	0.098007189	0.097975997	0.097713583	0.097189394	0.097331312	0.097167809	0.097192407	0.097228615	0.097421306	0.097497614	0.097314786	0.097281008	0.097322175	0.097265557
249	0.102437839	0.101888205	0.101661877	0.102169829	0.10247217	0.101926393	0.101633979	0.102985787	0.104423465	0.100963281	0.100843348	0.100896463	0.100637226	0.100277609	0.099905459	0.100400648	0.100485129	0.100235835	0.10058876	0.100396702	0.099953628	0.099787261	0.099723137	0.100341467	0.100234702	0.100323118	0.099639003	0.099619839	0.099598815	0.099640008	0.099474975	0.099557429	0.100110108	0.100187752	0.100070334	0.100229906	0.100194495	0.099942715	0.099440237	0.099587646	0.099415928	0.099444307	0.099488431	0.099663416	0.099782874	0.099581328	0.09954495	0.099589923	0.099525303
250	0.104662287	0.104117549	0.103891305	0.104395772	0.104695803	0.104158125	0.103864378	0.105219041	0.106651773	0.103196617	0.10307605	0.103121275	0.10286501	0.102509976	0.102147478	0.102644641	0.102723658	0.102481859	0.102824204	0.102631339	0.102204266	0.102038054	0.101979865	0.102578441	0.102475712	0.102558103	0.10191182	0.101901384	0.101876823	0.101933352	0.10173823	0.101845797	0.102356446	0.102426812	0.102314715	0.102473629	0.102433555	0.102193053	0.101713753	0.1018673	0.101686433	0.101718974	0.10177181	0.101927567	0.102094475	0.101872139	0.101832876	0.101882067	0.101808581
251	0.106910635	0.106371135	0.106144877	0.106645675	0.106943236	0.106414397	0.106119025	0.107477445	0.108905139	0.105454249	0.105332929	0.105369387	0.105116331	0.104766247	0.104414373	0.104913925	0.104986877	0.104753344	0.10508404	0.10489018	0.104480804	0.104314721	0.104263159	0.10483987	0.104741602	0.1048173	0.104213178	0.104212614	0.104184043	0.104257999	0.104028819	0.104164758	0.104628233	0.104690503	0.104584303	0.104742541	0.104697248	0.10446926	0.104015893	0.104176355	0.103985187	0.104022433	0.104085181	0.104219181	0.104439742	0.104193915	0.104151326	0.104205296	0.104121815
252	0.109185212	0.10865149	0.108425183	0.108921952	0.109216797	0.108697762	0.10840053	0.109763359	0.111185576	0.107738993	0.107616807	0.107643458	0.107393947	0.107049367	0.106709404	0.107211653	0.107277818	0.107053525	0.107371185	0.107176204	0.106786642	0.106620734	0.106576632	0.107128781	0.107035497	0.107103722	0.106547088	0.106557771	0.106524628	0.106618515	0.106350602	0.106518753	0.106928749	0.10698193	0.106882352	0.10703984	0.106988695	0.106774752	0.106350744	0.106518985	0.106316222	0.106358806	0.106432901	0.106542056	0.106823601	0.106551174	0.106504729	0.106564126	0.106469354
253	0.111483314	0.110955543	0.110729023	0.11122173	0.111513767	0.111005124	0.110705658	0.112074111	0.113491079	0.110047217	0.109924035	0.109940106	0.109694301	0.109355438	0.109028129	0.109533612	0.109592461	0.109378044	0.109681828	0.109485461	0.109117137	0.108951311	0.10891528	0.10944115	0.109353211	0.109413355	0.108907927	0.108930874	0.108892733	0.109008439	0.108698164	0.108901502	0.109253552	0.109296934	0.109204449	0.109361222	0.109303699	0.109104851	0.108712559	0.108889321	0.10867387	0.108722289	0.108808813	0.108890894	0.109239075	0.108937521	0.108886823	0.108952167	0.108845048
254	0.113804941	0.113283295	0.113056397	0.113545009	0.113834145	0.113336483	0.113034409	0.1144097	0.115821648	0.112378923	0.112254611	0.112259329	0.112017394	0.111684461	0.111370548	0.111879802	0.111930807	0.111726901	0.112015967	0.11181795	0.11147229	0.111306454	0.111279104	0.111776976	0.111694745	0.111746199	0.111295694	0.111331922	0.111288356	0.111427772	0.111071504	0.111313006	0.111602641	0.111635513	0.111550592	0.111706686	0.111642259	0.111459556	0.111101337	0.111287363	0.111058131	0.111112879	0.111212916	0.111265695	0.111686166	0.111352954	0.11129761	0.111369417	0.111248897
255	0.116150094	0.115634747	0.115407305	0.11589179	0.116177932	0.115691838	0.115386784	0.116770126	0.118177282	0.114734109	0.114608537	0.114601128	0.114363224	0.114036435	0.113736661	0.114250222	0.114292855	0.114100097	0.114373602	0.114173673	0.113852101	0.113686162	0.113668105	0.114136259	0.114060097	0.114102253	0.113710389	0.113760914	0.113711499	0.113876514	0.113470623	0.113753263	0.113976018	0.113997667	0.113920781	0.114076233	0.114004376	0.113838867	0.113517078	0.11371311	0.113469004	0.113530579	0.11364521	0.113666459	0.114164872	0.113797476	0.113737088	0.113815877	0.113680901
256	0.118529349	0.11802113	0.117793149	0.118272922	0.118555685	0.118082547	0.117774265	0.119166243	0.12056775	0.117124891	0.116997936	0.116977006	0.11674364	0.116423829	0.116140042	0.116658154	0.116691431	0.116511188	0.11676718	0.116565229	0.116270712	0.116104812	0.116097204	0.116531787	0.11646242	0.11649422	0.116168507	0.116235298	0.116179238	0.11637345	0.115911379	0.116240532	0.116387375	0.116396446	0.116328613	0.116483267	0.116403149	0.116256979	0.115976578	0.116183727	0.115923057	0.115992338	0.116123626	0.11610884	0.116695518	0.116289675	0.11622346	0.116310131	0.116158929
257	0.120951119	0.120451375	0.120222994	0.120697033	0.120975798	0.120517637	0.120205983	0.121606681	0.123000819	0.119560901	0.119432448	0.119396106	0.119168059	0.118856555	0.118591483	0.119114157	0.119136733	0.118970956	0.119206595	0.119002636	0.118739367	0.118573834	0.118578269	0.118973725	0.118912168	0.118932197	0.118683161	0.118768945	0.118705155	0.118933519	0.118406385	0.118789329	0.118847603	0.118842225	0.118784897	0.118938449	0.118848995	0.118725178	0.118493188	0.118712858	0.118433461	0.118511637	0.11866242	0.118605284	0.119294265	0.118844334	0.1187712	0.118866955	0.118697189
258	0.123404997	0.122914433	0.122685625	0.12315345	0.123427886	0.122985938	0.122670643	0.124080762	0.125466879	0.122030221	0.121900146	0.121847116	0.12162483	0.121322349	0.121077631	0.121605166	0.121616144	0.121466063	0.121679604	0.121473501	0.121244154	0.121079088	0.121096618	0.121449495	0.121396407	0.121403691	0.121238127	0.121344693	0.121272448	0.121538241	0.120940037	0.121381694	0.12134323	0.121322166	0.121276258	0.121428591	0.121329027	0.121229501	0.121050388	0.12128362	0.120983919	0.121071798	0.121243953	0.121140393	0.121941119	0.121443165	0.121362402	0.121468067	0.121278104
259	0.125890983	0.125410304	0.125181041	0.125642171	0.125911948	0.12548745	0.125168243	0.126588488	0.127965931	0.124532853	0.124401031	0.124330035	0.124113951	0.123821211	0.123598487	0.124131183	0.124129665	0.123996509	0.124186209	0.123977822	0.123785074	0.123620572	0.123652253	0.123959098	0.123915135	0.123908702	0.123833405	0.123962542	0.123881118	0.124187614	0.123512337	0.124017626	0.123874256	0.123836271	0.123802697	0.123953693	0.123843245	0.123769948	0.123648179	0.123896015	0.123574432	0.123672822	0.123868227	0.123714167	0.12463608	0.124086168	0.123997065	0.124113468	0.123901674
260	0.128409078	0.127938988	0.127709243	0.128163198	0.128427986	0.128022173	0.127698784	0.129129858	0.130497975	0.127068795	0.126935103	0.126844862	0.126635422	0.126353141	0.12615405	0.126692206	0.126677294	0.126562295	0.126726408	0.126515601	0.126362127	0.126198286	0.126245172	0.126502534	0.126468353	0.126447229	0.126468994	0.126622492	0.126531165	0.12688164	0.126123283	0.126697127	0.12644068	0.12638454	0.126364215	0.126513755	0.126391649	0.126346519	0.126286561	0.126550041	0.126204999	0.12631471	0.12653524	0.126326605	0.127379148	0.126773342	0.12667519	0.126803158	0.126567897
261	0.130973395	0.130515321	0.130285211	0.130730922	0.130990057	0.130605136	0.130277352	0.131719545	0.133076585	0.129653789	0.12951809	0.129406522	0.129204579	0.128934201	0.128761786	0.129305406	0.129275602	0.129180928	0.129316317	0.129103078	0.128993571	0.128830788	0.128894695	0.129096292	0.129073023	0.129035627	0.12916648	0.129347569	0.129245053	0.129645455	0.128793528	0.129444482	0.12906017	0.128983779	0.12897833	0.129126071	0.128991104	0.128977541	0.128987589	0.129268283	0.128897344	0.129019767	0.129268836	0.128998067	0.130197817	0.129529524	0.129420972	0.12956192	0.129300482
262	0.133596295	0.133152299	0.132922068	0.133357948	0.133610474	0.133249504	0.13291716	0.134370401	0.135713651	0.132301621	0.13216377	0.132028086	0.131834851	0.131578462	0.13143699	0.131985821	0.1319391	0.131867745	0.131970048	0.131754481	0.131695398	0.131534333	0.131617746	0.131754815	0.131744001	0.131688219	0.131944768	0.132157941	0.132042459	0.132501078	0.131541158	0.132280961	0.1317482	0.131648709	0.131660387	0.13180579	0.131656382	0.131679065	0.131770583	0.13207052	0.131670491	0.131807528	0.132089897	0.131746383	0.133116168	0.132376464	0.132255603	0.13241146	0.132120191
263	0.136265728	0.135837253	0.13560702	0.136031988	0.136277233	0.135942441	0.135605325	0.137069897	0.138397581	0.134998849	0.134858712	0.134696811	0.134513144	0.134272206	0.134164749	0.13471879	0.134653641	0.134607794	0.134673843	0.134455939	0.134452018	0.134293073	0.134397824	0.134464022	0.134466803	0.134391041	0.134785428	0.135033945	0.134904199	0.135427042	0.134348541	0.135185827	0.134489684	0.134364978	0.134395425	0.134538143	0.134373082	0.134435441	0.134616707	0.134937467	0.134505892	0.134658947	0.134978065	0.13455417	0.136110723	0.135292955	0.135158423	0.135330616	0.135006782
264	0.138981692	0.138570182	0.138340068	0.138753041	0.138990334	0.138683949	0.138341849	0.139818033	0.141128377	0.137745474	0.137602914	0.137412695	0.137239459	0.137015434	0.136945063	0.137504313	0.137419223	0.137401075	0.1374277	0.137207452	0.137263429	0.137107008	0.137234932	0.137223914	0.13724143	0.137144092	0.137688457	0.137975581	0.137830274	0.138423347	0.137215674	0.13815908	0.137284621	0.137132587	0.137183446	0.137323131	0.137141204	0.137246671	0.137525963	0.137869126	0.137403547	0.137574025	0.137933338	0.137421427	0.139181482	0.138278998	0.138129431	0.138319388	0.137960254
265	0.141772525	0.141381008	0.141151437	0.141550043	0.141777987	0.141504403	0.141157194	0.142644552	0.143933494	0.140573415	0.140428254	0.140205752	0.140044747	0.139840826	0.139814059	0.140377665	0.140269703	0.140283688	0.140264377	0.140042109	0.140167608	0.140014978	0.14016984	0.140068155	0.140102663	0.139980739	0.140700587	0.141033575	0.140869853	0.141546787	0.140186985	0.141255031	0.140169523	0.139985954	0.140060625	0.140196348	0.139995337	0.140150961	0.140546539	0.1409149	0.140410802	0.140601687	0.141009067	0.140391632	0.142391532	0.141390572	0.141222665	0.141433417	0.141033436
266	0.144632121	0.144263284	0.144034615	0.144416757	0.144634113	0.144397256	0.144044797	0.145543045	0.146807017	0.143475793	0.143327863	0.143069515	0.142922337	0.142741339	0.142763953	0.143331244	0.143197784	0.143247852	0.143176816	0.142952779	0.14315637	0.143008613	0.143193762	0.142989491	0.143043008	0.142893793	0.143811747	0.144196995	0.14401234	0.144785122	0.143252899	0.144461977	0.143136521	0.142917662	0.143019167	0.143150126	0.142928028	0.143140078	0.143668049	0.144064143	0.143517453	0.14373139	0.144193755	0.143455415	0.145727278	0.144615614	0.14442648	0.144660712	0.144214944
267	0.147554418	0.147210609	0.146983136	0.147346995	0.147552678	0.147356013	0.14699814	0.148507149	0.149743071	0.146445781	0.146294921	0.145997563	0.14586561	0.145709983	0.145787016	0.146357505	0.146196226	0.146285846	0.14615801	0.145932384	0.146221593	0.146079606	0.146297977	0.145980721	0.146055025	0.145876115	0.147011942	0.147454993	0.147247217	0.148126204	0.146403914	0.147768301	0.146177807	0.14592035	0.146051335	0.146176849	0.145931878	0.146205849	0.146880186	0.147306288	0.146713375	0.146952669	0.147475991	0.146603477	0.149175225	0.147942149	0.147729319	0.147989374	0.147493477
268	0.150542045	0.150225782	0.149999835	0.150343452	0.150536299	0.150383518	0.150020086	0.151539641	0.152744191	0.149486404	0.149332452	0.148992718	0.148877489	0.148749883	0.148886776	0.14945985	0.149268274	0.149401169	0.149211077	0.148984091	0.149366999	0.149231797	0.149486553	0.149045072	0.149142064	0.148930906	0.150305963	0.150812867	0.150579588	0.151576133	0.149644564	0.151179771	0.14929693	0.148997331	0.149160645	0.149279963	0.149010225	0.149352031	0.150187949	0.150646456	0.150003467	0.150270622	0.150861454	0.149840212	0.152742242	0.151376177	0.15113691	0.151425331	0.15087463
269	0.153627878	0.153343814	0.153120173	0.153439819	0.153617713	0.153515367	0.153146409	0.15467522	0.155842052	0.152635497	0.152478235	0.152090258	0.151994548	0.15190011	0.15210734	0.152680817	0.152454516	0.152637563	0.15237501	0.152147482	0.152639121	0.152513208	0.152810354	0.152222906	0.152346038	0.152098184	0.153753728	0.154336904	0.15407326	0.155211165	0.153031539	0.154768519	0.152538298	0.152190045	0.152391094	0.152502542	0.152204812	0.152625607	0.153653827	0.154148685	0.153449008	0.153748989	0.154421179	0.153220566	0.156514216	0.154992702	0.154720912	0.155042751	0.154428358
270	0.156796649	0.156548447	0.156327682	0.156620449	0.156781716	0.156735029	0.156360494	0.157897771	0.159021943	0.155875487	0.155714724	0.155273799	0.155199801	0.155142518	0.155428225	0.156000651	0.155736103	0.155974714	0.155631701	0.155404176	0.156016349	0.155901538	0.156245756	0.15549548	0.155647481	0.155359363	0.157327409	0.15799632	0.157698601	0.158995885	0.15653851	0.158501045	0.155881287	0.155479248	0.15572225	0.155824582	0.155496251	0.156004758	0.1572488	0.157783236	0.15702154	0.157358168	0.158122177	0.15671902	0.160451259	0.158756892	0.158448044	0.15880719	0.158122173
271	0.160064895	0.159857467	0.159640449	0.15990237	0.160044789	0.160060607	0.159680608	0.161224801	0.162299614	0.159225923	0.159061445	0.158561434	0.158512116	0.158497548	0.158873058	0.15944175	0.159134288	0.159435786	0.1590014	0.158774873	0.159523652	0.159422851	0.159820631	0.158883941	0.159068469	0.158735436	0.161060818	0.161829304	0.161492101	0.162975566	0.160197356	0.162419653	0.159349526	0.158886758	0.159177536	0.159268872	0.158906588	0.159514808	0.161008627	0.161586663	0.160756073	0.161134833	0.162006323	0.160366102	0.164604991	0.162713185	0.162360256	0.16276229	0.161997
272	0.163446709	0.163286034	0.163073884	0.163300091	0.163420973	0.163507527	0.163122312	0.16467123	0.165688485	0.16270346	0.162535035	0.161968579	0.161947573	0.161982617	0.162461974	0.163023201	0.16266718	0.163040518	0.162501364	0.162277212	0.163182308	0.163099358	0.163558727	0.162406314	0.162627811	0.162244292	0.164982762	0.165868399	0.165484854	0.167188785	0.164035238	0.166560391	0.162963149	0.16243117	0.162776915	0.162854831	0.162454604	0.163177338	0.164963778	0.165590113	0.164682443	0.165110232	0.166109301	0.164187827	0.169019399	0.166899447	0.16649329	0.166945243	0.166087716
273	0.166931879	0.166823162	0.166616821	0.166803098	0.166900093	0.167064609	0.166674328	0.168226246	0.169178831	0.166296027	0.166123436	0.165484061	0.165494519	0.165585104	0.166180382	0.166731172	0.166321655	0.166774606	0.166119087	0.16589841	0.166976898	0.166914965	0.167442833	0.166049538	0.166311877	0.165872969	0.169072365	0.170090023	0.169654328	0.171607585	0.168032473	0.170897135	0.166707567	0.166099008	0.16650592	0.166568386	0.166126689	0.166976709	0.169092174	0.169771015	0.168779029	0.16926172	0.170405252	0.168165342	0.173662607	0.171288237	0.170821245	0.171329097	0.170369047
274	0.170552857	0.170504043	0.170305168	0.170444935	0.170514516	0.170767681	0.170372944	0.171924236	0.172801223	0.170042875	0.16986587	0.169144025	0.169190847	0.169346583	0.170077377	0.170611381	0.170140899	0.17068558	0.169895422	0.169680516	0.170959292	0.170924451	0.171532031	0.169856636	0.170165758	0.169664234	0.173403284	0.174579066	0.17408106	0.176335599	0.172258312	0.175525527	0.170631489	0.169934849	0.17041289	0.170456271	0.169968005	0.170965783	0.173472848	0.174209873	0.173123125	0.173670801	0.174989529	0.1723642	0.17865405	0.17598107	0.17543877	0.176012816	0.174933328
275	0.174305671	0.174324394	0.17413457	0.17422151	0.174260284	0.174612382	0.174213759	0.175760991	0.17655189	0.173939283	0.17375762	0.172944111	0.173032004	0.173262106	0.174147212	0.174658391	0.174119761	0.174767811	0.17382547	0.173618516	0.175123408	0.175121461	0.175819508	0.173822484	0.1741841	0.173613	0.177967219	0.179326128	0.178756077	0.181361658	0.176704936	0.180435136	0.174729172	0.173933399	0.174492131	0.174512948	0.173973202	0.175138389	0.178097014	0.178897696	0.177706129	0.178328459	0.179851821	0.176776922	0.183980963	0.180966986	0.180335523	0.180985632	0.179770475
276	0.178221439	0.178318234	0.178139881	0.178165117	0.178168469	0.178633342	0.178232011	0.179769455	0.180459772	0.178023808	0.177837236	0.176919688	0.177055276	0.177373144	0.178439965	0.178917858	0.178301196	0.179069033	0.17794956	0.177754249	0.17952205	0.179562511	0.180366761	0.177989949	0.17841201	0.177761967	0.182843035	0.18442405	0.183766812	0.186802671	0.181446336	0.18573242	0.179049803	0.178139262	0.178792527	0.178785341	0.178187624	0.179548642	0.183050698	0.183921647	0.182612104	0.183323952	0.18509931	0.181472653	0.189779316	0.186360268	0.185616622	0.186357989	0.184983087
277	0.182296392	0.182481491	0.182316957	0.182271871	0.182235315	0.182826414	0.182423513	0.183945629	0.184521298	0.182291955	0.182100226	0.181066611	0.181256333	0.181674991	0.182950179	0.1833846	0.182680298	0.183583883	0.182263025	0.18208294	0.184149432	0.184241577	0.185167347	0.182354147	0.182844386	0.182106291	0.188022957	0.189864122	0.189104917	0.192648518	0.186475172	0.191407813	0.183587912	0.182547398	0.183308659	0.183268175	0.182606177	0.184190682	0.188325741	0.18927335	0.187833063	0.188648946	0.190722652	0.186444346	0.196037623	0.19215096	0.191272563	0.192120028	0.190561898
278	0.186559003	0.186845488	0.186698005	0.186571419	0.186489287	0.187223477	0.186820837	0.18831962	0.188762685	0.186779705	0.186582581	0.185417805	0.185670041	0.186206887	0.187726157	0.188101803	0.187297569	0.188357736	0.186803654	0.186644064	0.189056355	0.18921371	0.19028164	0.186955563	0.187523966	0.186686374	0.193586414	0.195741683	0.194859573	0.199022765	0.191865775	0.197572377	0.188390488	0.187200083	0.188087297	0.188006048	0.187271969	0.189116854	0.194010126	0.195041482	0.193454923	0.194395269	0.19683486	0.191760699	0.202900772	0.198459592	0.197412765	0.198387237	0.196613763
279	0.191032903	0.191436431	0.191310101	0.191088475	0.190954043	0.19185118	0.191451371	0.192916331	0.19320537	0.191517716	0.191314987	0.190001263	0.190326237	0.191002944	0.192810973	0.193106909	0.192188002	0.193430192	0.191603818	0.191471769	0.19428789	0.194528613	0.195764703	0.191829257	0.192487915	0.19153731	0.199608249	0.202148846	0.201116217	0.206049268	0.197687998	0.204335563	0.193498828	0.192134108	0.193169645	0.193037888	0.192222672	0.19437396	0.200188527	0.201310686	0.199560335	0.200651998	0.203549114	0.197485331	0.210515154	0.205406647	0.204144727	0.205273697	0.203243786
280	0.195732531	0.196270397	0.1961699	0.195838172	0.195644055	0.196725864	0.196331963	0.197750951	0.197862356	0.196524976	0.196316457	0.194834315	0.19524345	0.196084536	0.198231994	0.198423323	0.197373425	0.198826096	0.196683627	0.196587381	0.19987258	0.200218088	0.201651976	0.196997136	0.197759502	0.196681063	0.20613758	0.209146988	0.207931482	0.213812461	0.203987568	0.211771158	0.198938946	0.197372515	0.198581695	0.198388118	0.197481939	0.199991778	0.206917241	0.208136947	0.206204234	0.207478651	0.210942582	0.203659563	0.218981062	0.213074096	0.211540768	0.212856426	0.21052273
281	0.200691066	0.201384407	0.201315808	0.200855328	0.200592589	0.201885144	0.201501471	0.202858325	0.202763387	0.201845449	0.201631026	0.199957078	0.200464667	0.201501499	0.204053547	0.204105512	0.202904599	0.204603391	0.202089721	0.202040514	0.205877361	0.206357163	0.208027359	0.202510185	0.203392943	0.202168804	0.213291945	0.216884232	0.215441663	0.222518711	0.210873775	0.22005838	0.204771657	0.202969011	0.20438427	0.20411371	0.203104978	0.206040341	0.214332015	0.215654813	0.213519082	0.215019171	0.219204014	0.210381704	0.228544131	0.221662071	0.219776331	0.221322603	0.218622347
282	0.205938506	0.206812115	0.206782881	0.206171519	0.205829766	0.207363185	0.206995357	0.208269835	0.207935047	0.207519666	0.207299316	0.205406535	0.206029716	0.207300602	0.210337205	0.210204333	0.208828811	0.21081647	0.207865283	0.207877471	0.212365933	0.213018336	0.214972588	0.208416014	0.209439013	0.208048443	0.221188893	0.225511776	0.223784944	0.23238508	0.218455558	0.22938293	0.211054395	0.208973923	0.210634946	0.210268161	0.209143712	0.212586775	0.22257115	0.224000267	0.221639826	0.223421236	0.228532351	0.217748709	0.239463921	0.231380522	0.229032665	0.230866448	0.227720313
283	0.211513889	0.212597523	0.212617107	0.211827951	0.21139483	0.213204608	0.212860145	0.214026159	0.213411577	0.21360128	0.21337513	0.211231675	0.211991599	0.213544817	0.217167391	0.216787876	0.215209255	0.217538511	0.214067703	0.214160234	0.219425116	0.220301869	0.222601575	0.214778396	0.215965881	0.214384308	0.229996342	0.23524979	0.23316129	0.243736731	0.226887928	0.240018943	0.217864883	0.215454867	0.217411816	0.216923469	0.215668143	0.219723216	0.231835788	0.233369489	0.230762731	0.232901098	0.239226539	0.225897272	0.25213069	0.242543106	0.239576529	0.241774979	0.238078462
284	0.217461663	0.218790981	0.218871326	0.217871678	0.217332529	0.219460406	0.219149278	0.220173376	0.219231506	0.220152552	0.219920948	0.217489414	0.218412236	0.220308707	0.224646121	0.223936127	0.222120029	0.224855971	0.220763869	0.220961644	0.227159024	0.228330065	0.231054492	0.22167232	0.223053925	0.221252267	0.239926676	0.246382781	0.243827338	0.257007145	0.23636599	0.252325832	0.225295566	0.222491622	0.224808028	0.224164737	0.222761202	0.227561099	0.242385709	0.244013388	0.241141333	0.243740259	0.251687155	0.234997771	0.267066051	0.255566659	0.251756428	0.254424811	0.250039421
285	0.223833465	0.225451271	0.225607491	0.224357534	0.223694929	0.226190028	0.225925406	0.226764714	0.225439047	0.227247243	0.227010847	0.224247323	0.225365564	0.227682596	0.232899673	0.23174507	0.229649892	0.232873221	0.228033408	0.228369174	0.235695412	0.23725584	0.240508245	0.229187897	0.230799981	0.228743768	0.251255917	0.259288942	0.256121844	0.272791416	0.247141762	0.266788418	0.233458891	0.230180378	0.232937238	0.232094762	0.230523327	0.236238477	0.254566366	0.256261999	0.253112888	0.256316241	0.266467891	0.245268219	0.284987168	0.271021495	0.266040615	0.269324211	0.264064332
286	0.230692748	0.232650968	0.232902422	0.231353098	0.230546107	0.233466752	0.233266187	0.233865155	0.232087844	0.234977769	0.234737713	0.231590294	0.232945046	0.235782353	0.242093562	0.240336457	0.237911267	0.241723478	0.235976559	0.236493939	0.245200104	0.247281588	0.251199181	0.237439645	0.239327438	0.236975419	0.264363595	0.274499725	0.270517751	0.291951182	0.259559497	0.284097092	0.242499514	0.238643794	0.241946157	0.240844839	0.239083193	0.245936387	0.268864084	0.270574545	0.267152445	0.27116496	0.284377481	0.257003867	0.306931276	0.289730758	0.283093254	0.287196856	0.28080848
287	0.238118911	0.240481398	0.24085332	0.238943243	0.237966406	0.241382579	0.241269835	0.241555312	0.239243962	0.243462565	0.243220703	0.239627594	0.241271933	0.244761119	0.252452499	0.249868697	0.24705019	0.251581437	0.244722571	0.245480825	0.255895288	0.258685402	0.263455841	0.246576988	0.24879778	0.246100019	0.279796	0.292799802	0.28770831	0.315800681	0.274110237	0.305285881	0.252609089	0.248042555	0.252030034	0.250587293	0.248610403	0.256900735	0.285999859	0.287621756	0.283964911	0.289088765	0.306665333	0.270622022	0.334472864	0.312945669	0.303904376	0.309125538	0.301250811
288	0.246203399	0.24904832	0.24957342	0.24722608	0.246048545	0.250043781	0.250050688	0.249927085	0.246982193	0.252841483	0.252600681	0.248489004	0.250491526	0.254806196	0.264259279	0.260531787	0.257241588	0.262658454	0.254425081	0.255504168	0.26805629	0.271821621	0.277702006	0.256779833	0.259406043	0.25630241	0.298283136	0.31526303	0.30863656	0.346184209	0.291443529	0.331786579	0.264022203	0.258570914	0.2634291	0.261530842	0.259311416	0.269441057	0.306968236	0.308313622	0.304523909	0.311204381	0.335113793	0.286670288	0.369794909	0.342418359	0.329838893	0.336605773	0.326743847
289	0.255061626	0.258485912	0.259207267	0.256325899	0.25490981	0.259584788	0.259754587	0.259095152	0.255395274	0.263295489	0.263060144	0.258343708	0.260795049	0.266169357	0.277905079	0.272575363	0.268715091	0.27523475	0.265284275	0.26679399	0.282057432	0.287186226	0.294537926	0.268285682	0.271410461	0.267827843	0.32089243	0.34348789	0.334701962	0.385864815	0.312500415	0.365743563	0.277053796	0.270486323	0.276467708	0.273952553	0.271461913	0.283985354	0.33327004	0.333999833	0.330301474	0.339206849	0.37244806	0.305936865	0.416085027	0.380777759	0.362935884	0.371866339	0.359311812
290	0.264837884	0.268962828	0.269937829	0.266398707	0.264697187	0.270173972	0.270565945	0.269200897	0.264596798	0.275057151	0.274833967	0.269411304	0.272433531	0.279189161	0.293932369	0.286325558	0.281770563	0.289680246	0.277559495	0.279652547	0.298407233	0.305475144	0.314815688	0.281406793	0.28515159	0.281000659	0.349179913	0.379818881	0.367962783	0.438755117	0.338644381	0.410286923	0.292125732	0.284128654	0.291583296	0.288218749	0.285429041	0.301126355	0.36716176	0.366672938	0.363517282	0.375642594	0.422639457	0.329557254	0.477597731	0.431786174	0.406177689	0.418129158	0.401918884
291	0.275710925	0.280689128	0.281994834	0.277638604	0.27559327	0.282020111	0.28271598	0.280416456	0.274724213	0.288423411	0.28822255	0.281975976	0.285736157	0.294321596	0.313095034	0.302205961	0.296797594	0.306481038	0.291584953	0.294475606	0.317795499	0.327664951	0.339742031	0.296552223	0.301076843	0.29624864	0.385370719	0.427528013	0.411341212	0.50954333	0.371835301	0.469635956	0.309801676	0.29994498	0.309365045	0.304811782	0.30170066	0.321684674	0.411945002	0.409198671	0.407435611	0.424175518	0.490707405	0.35915462	0.558606949	0.50012855	0.463642756	0.479646583	0.458620722
292	0.287904902	0.293929457	0.295670152	0.290290013	0.287827693	0.295384892	0.296497961	0.292953416	0.28594563	0.303777917	0.303614782	0.296411167	0.301141621	0.312190424	0.336450899	0.320772263	0.314308134	0.326282209	0.307796724	0.311787976	0.341165901	0.355130137	0.371017542	0.314264503	0.3197808	0.314143246	0.432495534	0.490632816	0.468627015	0.601283711	0.41483438	0.5483158	0.33084207	0.31853034	0.330614702	0.324373443	0.320932746	0.346801481	0.472079768	0.465414799	0.466510115	0.48949094	0.580656753	0.39700346	0.659339717	0.589487406	0.539942085	0.560717291	0.534009574
293	0.301703827	0.309020373	0.31133832	0.304663879	0.30169229	0.310599093	0.312287435	0.307073524	0.298468267	0.321621324	0.321519405	0.313214918	0.319243493	0.33365959	0.365484095	0.342758297	0.334980855	0.34994443	0.326769957	0.332293047	0.369809434	0.389778796	0.410966361	0.335270511	0.342060202	0.335455917	0.494150426	0.572372953	0.543576836	0.708777565	0.471272165	0.64757021	0.356276106	0.340683997	0.356427078	0.347763134	0.344014499	0.378046158	0.552269515	0.539463942	0.545567789	0.575686279	0.68921976	0.446091885	0.767647628	0.696601228	0.637171075	0.661668051	0.630246987
294	0.317468867	0.326390754	0.329481025	0.321157058	0.317559355	0.328081172	0.33056617	0.323100196	0.312547831	0.342607575	0.342603076	0.333056055	0.340849292	0.359922225	0.402213592	0.369126296	0.359712587	0.378602796	0.349264131	0.356932829	0.405444731	0.434103138	0.462459998	0.360542248	0.368976508	0.361225809	0.572949913	0.670576178	0.636530828	0.810564463	0.544932383	0.757005519	0.38747052	0.367475246	0.388267935	0.376120484	0.372141523	0.417462072	0.653319961	0.63270789	0.645879634	0.680806266	0.796803834	0.509649595	0.855365389	0.802388002	0.746961277	0.770270244	0.739367153
295	0.335659856	0.346586066	0.350716175	0.340276104	0.335904347	0.348358758	0.351950354	0.341431142	0.328499545	0.367585117	0.367734675	0.356833667	0.367053038	0.392587694	0.449159444	0.401107541	0.3896685	0.413701644	0.376274481	0.386951746	0.450193283	0.490866851	0.528153014	0.391358791	0.401910173	0.392828252	0.666284511	0.770487397	0.737649922	0.876128516	0.636734824	0.848919808	0.426144201	0.400305516	0.427989644	0.410908411	0.406872412	0.467353652	0.763128871	0.736608873	0.756246536	0.787784412	0.87135885	0.589214147	0.896893179	0.875376322	0.843098983	0.857703794	0.835962169
296	0.356859284	0.37029263	0.375826049	0.362662866	0.3573312	0.372088927	0.377217483	0.362549289	0.34670957	0.397629333	0.398023087	0.38574123	0.399300471	0.433685788	0.508808855	0.440181755	0.426292937	0.456919672	0.409070156	0.423925974	0.506190993	0.561790388	0.608138722	0.429325775	0.442544611	0.431991839	0.760278106	0.845530688	0.823256347	0.892303912	0.737983118	0.895022483	0.474181858	0.440908817	0.47761228	0.453854149	0.450079876	0.529387678	0.852158506	0.827140768	0.84761843	0.865421346	0.895050437	0.680214975	0.892506021	0.897907383	0.895160148	0.897803214	0.88981942
297	0.381793113	0.398350771	0.405768329	0.38911373	0.38259389	0.400066315	0.40731594	0.387025799	0.367643897	0.434027046	0.434810144	0.421300841	0.439378117	0.485374261	0.581905556	0.487868588	0.471180761	0.509790272	0.449161704	0.469650079	0.574324065	0.644439154	0.695665239	0.476231879	0.492623378	0.48061997	0.831070903	0.876536872	0.869223439	0.871091112	0.825408772	0.892953251	0.532950613	0.491135202	0.538523645	0.506593121	0.503581779	0.602514427	0.893219156	0.877272671	0.891666735	0.893108151	0.877710557	0.76727527	0.859576151	0.87980092	0.89725567	0.891370861	0.894016944
298	0.411332975	0.431728598	0.441628619	0.420570837	0.412597025	0.433192398	0.443316583	0.415501548	0.39184807	0.478114804	0.47951862	0.465265369	0.489144491	0.548903852	0.66401796	0.545067277	0.525582682	0.572662609	0.498050877	0.525620419	0.651544469	0.728133871	0.774401269	0.533460381	0.553150234	0.540084157	0.861533884	0.867218176	0.871693343	0.829515011	0.873497633	0.860306635	0.601705073	0.552168834	0.609639217	0.569644276	0.56803948	0.680065216	0.886909539	0.881148042	0.88745528	0.878130591	0.837542273	0.828436254	0.812253492	0.839213057	0.866450072	0.856498513	0.864732885
299	0.446438427	0.471391347	0.484423189	0.458031189	0.448329777	0.472346967	0.486216698	0.448618647	0.419921328	0.530779056	0.533149032	0.519148215	0.549654051	0.622409939	0.742541496	0.610647459	0.58921918	0.642791633	0.556483409	0.591708061	0.727966692	0.794801379	0.825262701	0.600547927	0.622664279	0.609541485	0.854014634	0.832804172	0.843966678	0.777935492	0.876591756	0.812405711	0.675239262	0.622744073	0.684831304	0.640448459	0.640814961	0.749097951	0.851531378	0.852899792	0.853092254	0.838741408	0.786161463	0.850951472	0.758097999	0.787691491	0.81918727	0.807585313	0.818398677
300	0.487964984	0.517950583	0.534594793	0.502276101	0.490650716	0.518058244	0.53644046	0.486854775	0.452439767	0.591336757	0.595105886	0.582973786	0.619245751	0.698005072	0.799821513	0.679353601	0.658228306	0.712209935	0.622844384	0.663768414	0.78799638	0.82929359	0.839892054	0.672735041	0.694750531	0.683243686	0.821910738	0.785350511	0.799930728	0.721670042	0.848227716	0.757272223	0.74250377	0.696431767	0.75183732	0.711062932	0.713446246	0.795468754	0.801941334	0.807760406	0.803929769	0.78744935	0.729466143	0.839329282	0.701004086	0.731068839	0.764175649	0.752050582	0.763939069
301	0.536199159	0.570937748	0.591040817	0.553264192	0.539775196	0.569837496	0.592873845	0.530191208	0.48977753	0.65582518	0.661329677	0.653044994	0.691037727	0.761709498	0.824274466	0.740897949	0.723534765	0.768424248	0.691022277	0.731703847	0.818919564	0.829803169	0.824205659	0.739325137	0.757339288	0.749221868	0.776481736	0.73142622	0.747677354	0.663518213	0.803062039	0.698965093	0.789988752	0.760672116	0.796736853	0.768667346	0.772263315	0.81227591	0.745612071	0.75435516	0.747738854	0.730510163	0.670540952	0.805824221	0.642977786	0.672373423	0.705749141	0.69367504	0.705822987
302	0.59000028	0.627694574	0.649827412	0.609108008	0.594351664	0.625173687	0.651579358	0.577570189	0.531770032	0.715861101	0.722966288	0.719973697	0.752516713	0.799824194	0.817355953	0.783205387	0.772696459	0.800193902	0.749899357	0.781737395	0.818989713	0.80515891	0.789212933	0.786633144	0.797321312	0.793410745	0.724178437	0.674535475	0.691491262	0.604912143	0.74953804	0.639569405	0.809361504	0.801584934	0.812227902	0.80148484	0.804965915	0.802480605	0.686314228	0.697111114	0.688420036	0.671154467	0.610962014	0.760234301	0.585020657	0.613139885	0.646130081	0.634389314	0.646362212
303	0.645627592	0.682386714	0.703544884	0.664918729	0.650265498	0.678626484	0.705141121	0.626206285	0.577167363	0.76051858	0.768358398	0.77044356	0.790718826	0.807648862	0.788457656	0.799247059	0.796424338	0.804325356	0.787532679	0.804149047	0.795585284	0.76532384	0.743306182	0.805924858	0.808598367	0.808291055	0.668503807	0.616525502	0.63365426	0.546577641	0.691974871	0.580117892	0.801911638	0.812731367	0.801091801	0.806035837	0.808371591	0.773895606	0.625975633	0.638344528	0.627973128	0.611025754	0.551530674	0.708217659	0.527625853	0.554137779	0.586412549	0.575147124	0.58670921
304	0.696295256	0.726786402	0.743256161	0.712941533	0.700355155	0.722473281	0.744612182	0.671312227	0.623070058	0.781919414	0.789232176	0.794513391	0.800195755	0.790139811	0.746379496	0.790371316	0.793809335	0.785551101	0.798231252	0.79887143	0.757355238	0.716944031	0.691471922	0.798129243	0.794434562	0.796416164	0.61140924	0.558385315	0.575393056	0.488916712	0.632715852	0.521160049	0.774678748	0.797704584	0.771074426	0.787173062	0.788002618	0.73355325	0.565595041	0.579273895	0.56743619	0.550987017	0.492701832	0.65297774	0.471057008	0.495791484	0.527172604	0.516455233	0.527478171
305	0.733795269	0.753380924	0.762463788	0.745057978	0.736343342	0.749477991	0.763506519	0.706922514	0.664836302	0.779013926	0.784807366	0.790960815	0.784430342	0.755624399	0.696913379	0.762927499	0.770409107	0.751249842	0.784481504	0.772583981	0.710575796	0.663968318	0.636608774	0.770247045	0.762455582	0.765555229	0.553961918	0.500659921	0.517374432	0.432204806	0.573009325	0.463023565	0.734948761	0.76463317	0.729430521	0.752531861	0.751938504	0.686295334	0.505716413	0.520543756	0.50737558	0.491524531	0.434796782	0.596327386	0.415514215	0.438386729	0.468746622	0.458617335	0.469032831
306	0.752004654	0.759007821	0.760222063	0.756590207	0.752513063	0.756292107	0.760927527	0.727875553	0.696881169	0.75670516	0.760612772	0.766068994	0.751320756	0.710948195	0.643349872	0.723660071	0.73341915	0.707525892	0.753385942	0.733061122	0.658974274	0.60859984	0.580310972	0.729826758	0.71963696	0.723139543	0.496735163	0.443688138	0.459986168	0.376758673	0.513507582	0.405993381	0.687837715	0.720775508	0.681001738	0.708389435	0.70656514	0.635058287	0.446689078	0.462518292	0.448154887	0.43297852	0.378180551	0.539236235	0.361294723	0.382240186	0.411413536	0.401908108	0.411672442
307	0.749640627	0.745466929	0.740068654	0.7480079	0.748165289	0.744272041	0.740472225	0.731888361	0.714671866	0.721187456	0.72328433	0.727344231	0.707607529	0.660391942	0.587675664	0.677301604	0.688202132	0.658308252	0.711431804	0.685748975	0.604806053	0.552172324	0.523541265	0.68204054	0.670521306	0.674023223	0.440132871	0.387821155	0.403579226	0.323113146	0.454659669	0.350497437	0.636518725	0.670746695	0.628753277	0.658743136	0.655857481	0.581676538	0.388893868	0.405528023	0.390165102	0.37575769	0.323446712	0.482308134	0.308961952	0.32787798	0.355581928	0.346755874	0.355820563
308	0.729848341	0.717375261	0.707146374	0.723442622	0.726819329	0.717664539	0.707317697	0.720047828	0.716423691	0.677402843	0.677916559	0.68036297	0.657660163	0.606495094	0.531060299	0.626794627	0.638137127	0.605975582	0.663014387	0.633942529	0.549397315	0.495476079	0.46689488	0.630011972	0.617826722	0.621089958	0.384555388	0.333589073	0.348632229	0.27218713	0.396885286	0.297280206	0.582897534	0.617259483	0.574457044	0.605993519	0.602174633	0.527254706	0.332916745	0.350036551	0.333998267	0.320515869	0.271587695	0.425980718	0.259504884	0.276204879	0.301963481	0.293915645	0.302197212
309	0.697387044	0.67939843	0.665866376	0.687726915	0.693295311	0.680976294	0.665878934	0.695430569	0.703231344	0.628638104	0.627802822	0.628600208	0.604156537	0.550842647	0.474259298	0.573987459	0.585338597	0.552014003	0.610876621	0.579671379	0.493574876	0.439068928	0.410854977	0.575672237	0.563237427	0.566122267	0.330580258	0.281862303	0.295921251	0.225347093	0.340761957	0.247526586	0.528163834	0.561981965	0.519220197	0.551636198	0.546982709	0.47251365	0.279715334	0.296814013	0.280614581	0.268307427	0.224052058	0.370728622	0.214363378	0.228579647	0.251704986	0.244587741	0.251949662
310	0.656452833	0.634982749	0.619229947	0.64467771	0.6516725	0.637648984	0.619144437	0.661520768	0.678060416	0.576881336	0.57489483	0.574063741	0.548674049	0.494408219	0.417855445	0.519990429	0.531074201	0.497321672	0.556636929	0.524146298	0.437906806	0.383490774	0.35599878	0.520174546	0.507762581	0.5101914	0.279167673	0.233998364	0.246695414	0.184273171	0.287240589	0.202879102	0.473059888	0.50591065	0.463748736	0.496575558	0.491175344	0.41800567	0.230763182	0.247119233	0.231487898	0.220691863	0.182582264	0.317270459	0.175211512	0.186704282	0.206429351	0.200420883	0.206692312
311	0.610133256	0.586581102	0.569352191	0.597037745	0.604924521	0.590160888	0.569215601	0.621208929	0.643991752	0.523524377	0.520551975	0.518152987	0.492332926	0.437956209	0.362500532	0.465607719	0.476252728	0.442581521	0.501429169	0.468245512	0.382962929	0.32945593	0.3031589	0.464359279	0.4521537	0.454095565	0.23167116	0.191627352	0.2025395	0.150374544	0.237683882	0.164978242	0.418202799	0.449791488	0.408656337	0.441502237	0.43545119	0.364340776	0.187791749	0.20256109	0.188351518	0.17940001	0.148591659	0.266675652	0.143325657	0.152044531	0.167803735	0.163035984	0.168080384
312	0.56048026	0.535778352	0.517587134	0.546595131	0.555014694	0.540131746	0.517433569	0.576653112	0.603742842	0.469463478	0.465646918	0.461774193	0.435910652	0.382172374	0.309066293	0.411442816	0.421529807	0.38837581	0.446008008	0.41262902	0.329456244	0.278005919	0.253562235	0.408869434	0.397021928	0.398479984	0.189757769	0.156278674	0.16508647	0.124221196	0.193819323	0.134889978	0.364208832	0.394240528	0.354593801	0.38700989	0.380436961	0.312328677	0.152351898	0.164804296	0.152762359	0.145830963	0.122576046	0.220435705	0.119046722	0.125243504	0.13697706	0.133449118	0.137253515
313	0.508843943	0.483634014	0.464859885	0.494536104	0.503240668	0.488643368	0.464712643	0.529355744	0.559349866	0.415386531	0.410861079	0.405658322	0.380123902	0.327893142	0.258795868	0.358125649	0.367549726	0.335400674	0.391023964	0.357984457	0.278421199	0.230590503	0.208816267	0.354391926	0.343066851	0.344072764	0.154935641	0.128717154	0.135368408	0.105258086	0.157278326	0.112560011	0.311894501	0.339974893	0.302445543	0.3338118	0.326905782	0.263124701	0.125097598	0.134898942	0.125383357	0.12037352	0.103862517	0.180247097	0.101627824	0.105791453	0.11399484	0.111549962	0.114256647
314	0.456190134	0.430953371	0.411919918	0.44173836	0.450543947	0.436504385	0.411793034	0.480374537	0.512248608	0.362000277	0.35691686	0.350606573	0.325855699	0.276283112	0.213308074	0.306506324	0.315148598	0.284645252	0.337247183	0.305231056	0.231298018	0.188918058	0.170594455	0.301858612	0.291267159	0.291878743	0.127898324	0.108560103	0.113302388	0.092145952	0.128885703	0.09688113	0.262428369	0.288003463	0.253466092	0.282920096	0.275951605	0.218247599	0.10544492	0.112749381	0.105636239	0.102215705	0.09101251	0.147460473	0.089672635	0.092344012	0.097808336	0.096202155	0.098047706
315	0.403331815	0.378488133	0.359533504	0.388984118	0.397734183	0.384448793	0.359432639	0.430526139	0.463488025	0.310211013	0.304760788	0.297676813	0.274318729	0.228895113	0.174309917	0.257791353	0.265502364	0.237486387	0.285741106	0.255655762	0.189791409	0.154470796	0.140024262	0.252577291	0.242991552	0.243289859	0.10818826	0.094536317	0.097783029	0.083386719	0.108233236	0.086294444	0.217352633	0.239731642	0.209261353	0.235736138	0.229057696	0.179343526	0.091941171	0.097213876	0.092066565	0.089828216	0.082478869	0.122461914	0.081738938	0.083365536	0.086857769	0.085852353	0.087074341
316	0.351113848	0.327108654	0.308650045	0.337137644	0.345670717	0.333306942	0.308573334	0.380558282	0.413928973	0.261258055	0.255692382	0.248297108	0.227104976	0.187489092	0.142997296	0.213548357	0.220158053	0.195591	0.237955073	0.2109015	0.155397935	0.127862371	0.1171487	0.208206532	0.199927441	0.200009711	0.094499817	0.085120218	0.087279606	0.077741801	0.093954996	0.079373006	0.178345857	0.19687089	0.171484325	0.193940724	0.187937295	0.147660075	0.082967652	0.08672463	0.083048798	0.081644529	0.077013187	0.104504871	0.07667827	0.077577363	0.079682835	0.079096494	0.079880216
317	0.300586724	0.277962513	0.260539378	0.287311261	0.295432763	0.284167295	0.260479052	0.331312574	0.364412183	0.21673013	0.211356827	0.204206064	0.185983648	0.153495085	0.119461794	0.175433956	0.180807046	0.160487579	0.195617492	0.172653918	0.128737181	0.108526283	0.100941011	0.170419467	0.16367664	0.163641496	0.085324178	0.079018593	0.080406828	0.074324904	0.084430188	0.075059038	0.146653144	0.161001967	0.141218396	0.159046995	0.154024386	0.123469773	0.07721399	0.07987379	0.077265452	0.076445287	0.073735091	0.092159496	0.073677624	0.0740655	0.075191413	0.074898808	0.075373882
318	0.253106789	0.232519453	0.216771074	0.240935013	0.248407467	0.238440507	0.216716262	0.283858176	0.315907641	0.178284745	0.173416846	0.167044503	0.152351408	0.127407824	0.102760586	0.144622399	0.148734642	0.132956711	0.160275019	0.14203169	0.109322985	0.095147609	0.089932319	0.140284806	0.135125628	0.135054505	0.07939555	0.075277105	0.076118583	0.072503182	0.078297029	0.072601834	0.122552593	0.132934715	0.118510329	0.131787755	0.12786943	0.106041966	0.073737488	0.075605597	0.07376873	0.073361079	0.072019431	0.083969257	0.072154244	0.072180149	0.072608671	0.072524015	0.072779878
319	0.210297899	0.192431562	0.178971513	0.199659971	0.206228827	0.197757174	0.178911948	0.239558345	0.269623821	0.147132436	0.142998284	0.137758159	0.126656962	0.108597199	0.091413387	0.121313863	0.124288233	0.112704999	0.132698189	0.119103349	0.095874905	0.086226523	0.082710314	0.117804389	0.114063913	0.11400812	0.075776073	0.073222047	0.073672824	0.071826703	0.074555509	0.071473968	0.105280781	0.112357871	0.102413726	0.111809859	0.108920612	0.094045071	0.071882438	0.073175629	0.071899699	0.071785912	0.071423217	0.078745209	0.07169212	0.071461074	0.071391524	0.071454854	0.071554195
320	0.173754207	0.159112727	0.148317862	0.164985326	0.170451411	0.16359169	0.148247004	0.199979456	0.227030671	0.12351559	0.120187819	0.116160895	0.108207872	0.095674233	0.083966536	0.104679529	0.106742748	0.098566562	0.112529707	0.102895846	0.086900296	0.080493928	0.078179729	0.101958661	0.099342307	0.099323569	0.073808871	0.072378315	0.072549222	0.071972302	0.072515014	0.071299686	0.093453781	0.09804839	0.091481536	0.097905005	0.09585106	0.086080302	0.071188952	0.072063909	0.071196462	0.071292198	0.071628973	0.075631932	0.071991916	0.071578437	0.07115386	0.071322414	0.071309938
321	0.144504964	0.133188911	0.125043399	0.137705269	0.142008662	0.136715413	0.12495922	0.166547331	0.18968333	0.106636408	0.104041069	0.101085074	0.095579715	0.087113937	0.079288021	0.093325121	0.09472118	0.089076089	0.098529491	0.091921708	0.081130911	0.077025688	0.075566517	0.091251484	0.089455569	0.089476782	0.073028348	0.072403787	0.072374557	0.072706683	0.071691527	0.071807912	0.085642332	0.088477431	0.084316621	0.088594557	0.087164995	0.081009356	0.071326765	0.07189811	0.071327409	0.071572245	0.072408086	0.074030514	0.072837633	0.072294353	0.07161723	0.071860508	0.071768065
322	0.122576908	0.114239237	0.108376414	0.117570621	0.120814969	0.116871865	0.108279867	0.140049254	0.158814458	0.095107042	0.09309707	0.090978675	0.087243477	0.081659495	0.07657724	0.085850075	0.086778959	0.082937349	0.089180554	0.084749628	0.077638953	0.075175241	0.074326874	0.084268396	0.083050979	0.083107332	0.073098793	0.073051497	0.072879314	0.073862266	0.071738132	0.072803883	0.080697656	0.082303536	0.079833358	0.082588392	0.0816109	0.078006023	0.072058317	0.072409574	0.072054043	0.072404905	0.073596709	0.073513904	0.074074132	0.073438085	0.072581536	0.072877883	0.072728038
323	0.107039622	0.101070491	0.096972995	0.103476596	0.105868588	0.102970442	0.096865977	0.120318163	0.134875722	0.087515726	0.085942307	0.084442071	0.081955864	0.07840555	0.07527311	0.081144219	0.081748261	0.079183309	0.083165454	0.080274664	0.075773889	0.07448368	0.074071173	0.079926598	0.079116406	0.079201539	0.073778016	0.074144127	0.073869816	0.07531887	0.07240541	0.074148114	0.077794474	0.078535697	0.077260617	0.07893095	0.078279753	0.07648509	0.073213573	0.073405308	0.073205687	0.073631937	0.075077507	0.073773854	0.075590094	0.074887282	0.073903487	0.074237539	0.074046254
324	0.096500431	0.092274396	0.089461424	0.094007167	0.095767196	0.093621736	0.089345687	0.106382101	0.117380443	0.082737063	0.081481388	0.080430446	0.078827207	0.076720064	0.074974677	0.078412977	0.078789566	0.077132449	0.079514378	0.077716973	0.075073799	0.074620597	0.074518543	0.077463356	0.076941593	0.077049566	0.074892381	0.075554695	0.075207413	0.076990332	0.073515072	0.075740682	0.076351898	0.076481439	0.076054968	0.076950395	0.076535065	0.076026916	0.074670949	0.07474713	0.074660316	0.075140132	0.076766431	0.074588663	0.077305719	0.076554261	0.075480453	0.075841321	0.075619869
325	0.089629939	0.086645199	0.084747954	0.087901396	0.089209615	0.087590048	0.08462498	0.096949701	0.105200651	0.079968706	0.078943284	0.078218409	0.077241098	0.076157585	0.075395674	0.077099228	0.077316247	0.076304515	0.077552894	0.07653264	0.075208712	0.075350456	0.075469296	0.076346102	0.076028603	0.076154191	0.07631873	0.077193064	0.076793699	0.078815694	0.074940951	0.077510758	0.07595759	0.075655382	0.075829821	0.07617339	0.075927894	0.076330936	0.07634415	0.076336906	0.076331327	0.076849161	0.078604057	0.075801083	0.079164656	0.078376983	0.07723966	0.077619664	0.077375963
326	0.085380856	0.08327107	0.082023782	0.084192383	0.085181584	0.0839265	0.081894874	0.090837919	0.097083414	0.078628703	0.077769749	0.077280952	0.076748033	0.076390479	0.076326241	0.076793737	0.076898523	0.076345608	0.076790526	0.076322717	0.075935865	0.07650072	0.076777123	0.076183919	0.076011183	0.076149924	0.07796646	0.078992967	0.078556289	0.080750436	0.076590327	0.079406456	0.076307449	0.075700487	0.076300261	0.076251203	0.076127588	0.077176023	0.078169821	0.078102433	0.07815515	0.078700109	0.080547068	0.077295665	0.081125806	0.080310134	0.079127771	0.079521624	0.0792611
327	0.082999593	0.081506975	0.080721065	0.082192632	0.082956547	0.081954793	0.080587406	0.087116629	0.091930028	0.078309478	0.07757033	0.077251408	0.077033158	0.077189258	0.077619745	0.077208339	0.077234181	0.077006787	0.076883503	0.076807141	0.077085241	0.077950673	0.078339542	0.076702317	0.076632087	0.076780312	0.0797721	0.080908251	0.080444671	0.082763949	0.078398314	0.081391932	0.077187964	0.076366213	0.077266502	0.076938699	0.076902138	0.078407217	0.080103925	0.079993295	0.080087593	0.080652116	0.082565745	0.078991452	0.083161008	0.082322559	0.081107902	0.081512023	0.081238329
328	0.081943772	0.080887006	0.080428303	0.081406584	0.082011217	0.081186283	0.080290978	0.085100238	0.088897202	0.078714497	0.078061413	0.077864175	0.077868735	0.078388524	0.07917043	0.078133912	0.078103996	0.07810789	0.077582459	0.077783334	0.078534147	0.079613143	0.080082561	0.077702796	0.07770536	0.077860127	0.081690135	0.082906148	0.082422866	0.084834876	0.080318413	0.083442009	0.078444933	0.07747163	0.078584377	0.078058594	0.078084062	0.079912625	0.082115246	0.081973561	0.082097329	0.082676304	0.084639375	0.080830109	0.085250721	0.084392514	0.083154117	0.08356618	0.08328166
329	0.081824042	0.081075594	0.080849036	0.081477835	0.081969626	0.081268728	0.080708962	0.084292877	0.087369137	0.07963107	0.079039988	0.078929711	0.079092554	0.079870619	0.080903062	0.079421114	0.079351456	0.079520454	0.078709348	0.079106918	0.080195229	0.081426239	0.081953804	0.07904392	0.079098506	0.079257451	0.083688815	0.084964108	0.084466001	0.086948877	0.082318101	0.085539598	0.079968495	0.078887834	0.0801512	0.079484502	0.07955405	0.081612643	0.084182296	0.084018373	0.084162782	0.084752874	0.086754051	0.082770595	0.087381937	0.086505372	0.085248775	0.085667366	0.085373405
330	0.082367072	0.081837046	0.081775219	0.082156155	0.082567833	0.081954495	0.081633167	0.084344635	0.086909597	0.080910283	0.080364017	0.08031567	0.080591279	0.081553171	0.08276496	0.080965155	0.080866887	0.081154269	0.080139561	0.080676778	0.082007125	0.083346685	0.083916758	0.080626591	0.080718592	0.080879861	0.085746318	0.087066891	0.08655718	0.089096587	0.084375099	0.087673398	0.081681479	0.080524417	0.081894873	0.081127705	0.081228415	0.083451387	0.086290657	0.086110847	0.086269472	0.086868609	0.088900743	0.084784463	0.089546263	0.088651586	0.087380188	0.087804539	0.087501841
331	0.083380962	0.083005889	0.083060936	0.083265916	0.083620579	0.083069521	0.08291752	0.08500842	0.087210555	0.082447695	0.081933856	0.081929319	0.08228546	0.083378498	0.08471948	0.082692416	0.082573287	0.082945985	0.081785627	0.082421959	0.083926958	0.085344525	0.085946287	0.082381244	0.082500371	0.082662523	0.08784797	0.089204516	0.088685246	0.091272226	0.08647444	0.089836265	0.083529781	0.082317914	0.083764905	0.082925922	0.083048469	0.085389899	0.088430953	0.088239832	0.088407982	0.089014983	0.09107391	0.086852321	0.091738633	0.090825255	0.089540937	0.089970741	0.089659515
332	0.084730386	0.08446543	0.084603359	0.084683302	0.084997266	0.084490949	0.084459041	0.086109139	0.088053919	0.084169695	0.083679267	0.083705349	0.084119209	0.085306235	0.08674132	0.084551115	0.084416473	0.084851153	0.083585909	0.084292587	0.085924957	0.087399244	0.088025321	0.084258996	0.084398038	0.084559936	0.08998417	0.09137074	0.09084311	0.093472561	0.088606318	0.092023992	0.08547558	0.08422379	0.085726066	0.084835466	0.084973106	0.087401225	0.09059737	0.090398244	0.090572458	0.091186787	0.093270477	0.088961201	0.093956359	0.09302306	0.091726621	0.092161902	0.09184199
333	0.086325318	0.086138027	0.086334125	0.086325966	0.086611051	0.086136965	0.086189241	0.087529852	0.089294077	0.086027465	0.085553705	0.085600569	0.086055695	0.087310073	0.088814362	0.086507171	0.086360743	0.086840679	0.085499669	0.086255888	0.087981994	0.08949796	0.090143303	0.086227748	0.086381582	0.0865423	0.092149411	0.093562331	0.093026967	0.095696422	0.090765091	0.094234747	0.087494288	0.086212894	0.087755526	0.086827762	0.086975505	0.089468137	0.092786961	0.092582285	0.092759923	0.093381481	0.095489362	0.091103314	0.096198688	0.095243771	0.093935279	0.094376295	0.094047271
334	0.088085062	0.087954128	0.088192021	0.088120111	0.088384097	0.087934293	0.088046807	0.089165821	0.090800477	0.0879774	0.087515603	0.087576396	0.088062065	0.089366612	0.090924357	0.088530245	0.088374291	0.088888694	0.087490561	0.088282671	0.090081132	0.091629334	0.092290993	0.088258917	0.0884243	0.088583088	0.094339001	0.095776657	0.095233665	0.09794305	0.092945938	0.096467167	0.089564072	0.088259287	0.089833023	0.088877401	0.08903182	0.091575398	0.094997344	0.094788812	0.094967965	0.095597053	0.097729881	0.09327191	0.098465258	0.097486575	0.096165429	0.096612651	0.09627384
335	0.08996222	0.08987293	0.090141223	0.090022434	0.090270724	0.089839893	0.089995844	0.090955217	0.092495967	0.089994211	0.089540897	0.089610568	0.090119527	0.091462794	0.093063782	0.090603078	0.090438962	0.090980656	0.089537676	0.090356365	0.092213246	0.093787612	0.094463907	0.090336302	0.090511139	0.090667348	0.096551237	0.098013287	0.097462448	0.100213205	0.095147074	0.098721631	0.091672837	0.090348374	0.091947411	0.090970116	0.091128727	0.093714899	0.097228233	0.097017081	0.097196274	0.097833444	0.099992812	0.095464023	0.100757137	0.099752195	0.098417377	0.098871419	0.098521963
336	0.09192761	0.091869352	0.092159812	0.092006313	0.09224284	0.091827231	0.092014375	0.092859607	0.09433257	0.092062683	0.091615186	0.09168991	0.092217105	0.093591267	0.095228783	0.092715549	0.092544094	0.093108195	0.091628638	0.092467353	0.094373449	0.095970071	0.096660146	0.092450526	0.092633436	0.0927865	0.098786052	0.100273027	0.099713894	0.102508544	0.09736839	0.100999519	0.093813787	0.0924718	0.094092505	0.093097725	0.093258668	0.095882375	0.099480527	0.09926768	0.099445719	0.100091701	0.102279804	0.097678744	0.103076256	0.102042258	0.100692453	0.101154039	0.100792934
337	0.09395791	0.09392344	0.094230414	0.094050528	0.094278011	0.093875173	0.094084981	0.094848151	0.096271668	0.094170912	0.093727219	0.093804146	0.094346317	0.095746498	0.097416698	0.094859911	0.094681485	0.095264984	0.093753843	0.094608276	0.096558255	0.098174989	0.098878676	0.094594422	0.094784619	0.094934023	0.101043952	0.10255713	0.101989061	0.104831081	0.099610334	0.103302591	0.095981873	0.094623237	0.096263751	0.095254045	0.095415959	0.098074845	0.101755536	0.10154167	0.101717587	0.102373273	0.104592844	0.099915867	0.105424907	0.104358743	0.10299237	0.103462326	0.103088421
338	0.096036542	0.09602109	0.096340827	0.096140042	0.096360311	0.095968741	0.096195424	0.09689871	0.098285418	0.096310734	0.095869325	0.095946326	0.096501543	0.097925053	0.099626234	0.097031092	0.096845725	0.097447012	0.095906846	0.096774347	0.098765768	0.100401786	0.101119443	0.096763352	0.096960492	0.097105753	0.103326082	0.104867343	0.104289531	0.107183205	0.101873988	0.105633009	0.098174031	0.096798669	0.098458451	0.097435174	0.097597063	0.100290781	0.104055036	0.103840642	0.104013625	0.104680042	0.106934276	0.102175974	0.107805755	0.106704003	0.105319254	0.105798499	0.105410504
339	0.098155497	0.098155662	0.098485459	0.098267696	0.098482084	0.098100822	0.098340096	0.099000234	0.100359648	0.09847879	0.098038415	0.098113732	0.098680803	0.100126165	0.101857845	0.099227467	0.099034983	0.099653243	0.098085243	0.098964064	0.100996142	0.102651356	0.103383665	0.098955905	0.099159902	0.099300532	0.105634449	0.107206103	0.106617617	0.109567873	0.104161271	0.107993529	0.100389748	0.098997038	0.100676285	0.099640125	0.099801177	0.102530535	0.106381445	0.106166913	0.106336218	0.107014507	0.109306981	0.10446069	0.110222045	0.109080951	0.107675827	0.108165371	0.107761856
340	0.100312046	0.10032514	0.100662805	0.100431192	0.100640767	0.100269181	0.100517491	0.101148546	0.102488599	0.1006747	0.100234239	0.100306252	0.100884368	0.102350742	0.104113133	0.101449573	0.101249661	0.101884523	0.100289137	0.101177977	0.103250863	0.104925591	0.105673457	0.101172688	0.10138361	0.101519082	0.10797176	0.109576488	0.108976278	0.111988683	0.106474751	0.110387519	0.10263014	0.101219143	0.10291846	0.101869757	0.10202923	0.104795701	0.108737769	0.108523446	0.108688337	0.109379755	0.111714445	0.10677242	0.112677724	0.111493126	0.110065423	0.110566377	0.110145751
341	0.102493954	0.102519205	0.102864014	0.102619485	0.102824626	0.102462828	0.102718733	0.10332713	0.104651354	0.102892737	0.10245145	0.102519081	0.103108463	0.104596702	0.106391694	0.103694089	0.103486166	0.104138352	0.102514134	0.103412966	0.105529079	0.107224665	0.107989418	0.103410699	0.103628965	0.103758765	0.110339606	0.111980608	0.11136748	0.114448333	0.108815942	0.112817461	0.104893441	0.10346247	0.105183488	0.10412165	0.104279074	0.10708571	0.111126123	0.110912212	0.111072063	0.111777997	0.114159304	0.109112285	0.115175775	0.113943184	0.112490486	0.113004055	0.112564585
342	0.104703762	0.10474041	0.105091618	0.10483511	0.105036175	0.104684344	0.104946363	0.105538609	0.106850534	0.105135458	0.104692615	0.104754721	0.10535562	0.106866643	0.108696307	0.105963686	0.105747115	0.106417442	0.104762832	0.105671626	0.107833626	0.109551514	0.110334616	0.105672562	0.105898634	0.106022187	0.112741508	0.114422336	0.11379497	0.116951276	0.11118818	0.115287528	0.10718239	0.105729673	0.107474102	0.106398495	0.106553365	0.109403412	0.113550259	0.113336956	0.1134911	0.114213069	0.116645855	0.11148355	0.117721094	0.116435498	0.11495515	0.115482664	0.115022416
343	0.106937614	0.10698574	0.107343223	0.107074722	0.107271761	0.106930437	0.107197983	0.107777324	0.109078572	0.107401835	0.106956873	0.107012509	0.107625638	0.10916113	0.111028365	0.10825844	0.108032435	0.108722245	0.107034803	0.107954075	0.110165734	0.111907865	0.112711033	0.107958459	0.10819298	0.108309678	0.11518012	0.116904744	0.116261689	0.119501156	0.113593988	0.117801117	0.109497772	0.108021167	0.109791202	0.108700767	0.108852675	0.111750166	0.116013184	0.115800622	0.115948416	0.116688066	0.119177627	0.113888531	0.120317692	0.118973647	0.117462773	0.118005671	0.117522539
344	0.109195229	0.109255325	0.109619249	0.109338282	0.10953119	0.109201124	0.109474013	0.110042241	0.111333554	0.109692941	0.109245369	0.109293635	0.109919954	0.111482024	0.113390253	0.110580031	0.110343695	0.11105465	0.109331413	0.110261951	0.112527747	0.114296376	0.115121545	0.110270075	0.110513806	0.110622988	0.117658963	0.119431806	0.118771457	0.122102654	0.11603666	0.120362571	0.111841658	0.110338766	0.112136911	0.111030351	0.11117891	0.114128416	0.118518742	0.118307024	0.118447799	0.119206941	0.121759131	0.116330403	0.122970748	0.121562217	0.120017645	0.120577513	0.120069163
345	0.111480222	0.111552704	0.111923141	0.111629342	0.11181803	0.111500014	0.111777908	0.112337367	0.113619751	0.112012082	0.111561378	0.111601261	0.112241728	0.113832507	0.115785319	0.112931799	0.112684175	0.113418009	0.111655932	0.112598466	0.114923099	0.116720573	0.117569834	0.112610651	0.112864397	0.112965321	0.120182276	0.122008214	0.121328801	0.124761246	0.118520154	0.122976963	0.11421741	0.112685725	0.11451457	0.113390568	0.113535327	0.116541639	0.121071443	0.120860677	0.120993694	0.12177432	0.124395626	0.118813088	0.125686331	0.124206561	0.122624781	0.123203378	0.122667206
346	0.113791322	0.113877149	0.114254559	0.113946954	0.114131129	0.113826225	0.114109325	0.114660387	0.11593366	0.114359781	0.113905523	0.11393609	0.11459198	0.116214134	0.118215756	0.115315038	0.115055036	0.115813877	0.114009267	0.114964885	0.11735391	0.119182961	0.120058646	0.114981505	0.115246213	0.115338084	0.122753512	0.124637915	0.123937502	0.127481623	0.121047705	0.125648633	0.116626814	0.115063524	0.116926036	0.115782973	0.115923522	0.118992069	0.123675103	0.123465357	0.123589864	0.124394137	0.127091632	0.121339668	0.128469645	0.12691127	0.125288465	0.125887702	0.12532087
347	0.116133334	0.116233326	0.116618004	0.116295809	0.11647522	0.116184545	0.116472781	0.11701684	0.118281294	0.11674026	0.116281959	0.116302082	0.116974654	0.118630872	0.120685776	0.117733981	0.117460421	0.11824649	0.116395533	0.117365233	0.119824514	0.121688022	0.122592701	0.117386697	0.11766338	0.117745286	0.125378257	0.127327214	0.126603599	0.130271364	0.123624442	0.128384494	0.119074115	0.117476234	0.119375519	0.118211753	0.118347582	0.121484133	0.12633574	0.126127081	0.126242227	0.127072604	0.129854398	0.123915232	0.131329196	0.129683724	0.128015509	0.128637575	0.128036826
348	0.118506519	0.118621842	0.119014318	0.118676368	0.118850629	0.118575497	0.118869119	0.119406393	0.120661588	0.119154908	0.118692132	0.118700704	0.119391433	0.121084774	0.123197917	0.120190551	0.119902146	0.120717955	0.118816373	0.119801375	0.122337429	0.124238561	0.125175016	0.119828139	0.120117918	0.120188887	0.128060179	0.130080251	0.129331073	0.133135354	0.126253798	0.131189071	0.121561577	0.119925882	0.121865325	0.120679005	0.120809611	0.124020437	0.129057351	0.128849822	0.128954725	0.129813835	0.132688626	0.126543098	0.134270399	0.132528703	0.130810383	0.131457622	0.130819457
349	0.120914553	0.121046475	0.121447282	0.121092334	0.121261012	0.121002924	0.121302135	0.121833045	0.123078505	0.121607611	0.121139896	0.121135638	0.121846136	0.123579963	0.125756919	0.12268902	0.122384319	0.123232677	0.121275732	0.122277343	0.124897468	0.126839786	0.127811203	0.122309924	0.122614063	0.122672974	0.130806294	0.132905196	0.132127675	0.136083767	0.128942152	0.134071501	0.12409374	0.122416655	0.124399998	0.123189083	0.12331388	0.126605976	0.131847707	0.131641291	0.131734989	0.132625909	0.135604026	0.129229494	0.137304817	0.135456081	0.133682065	0.134357241	0.133677544
350	0.123359206	0.12350919	0.123918968	0.123545578	0.12370816	0.123468773	0.12377391	0.124298407	0.125533308	0.124100727	0.123627629	0.123609206	0.12434123	0.126119177	0.128365948	0.125232126	0.124909571	0.125793525	0.123776107	0.124795762	0.127507825	0.129495148	0.130504946	0.124834722	0.125154582	0.125200233	0.133621054	0.135807091	0.13499824	0.139122635	0.131693628	0.137037321	0.126673587	0.124951305	0.12698254	0.125744832	0.125863204	0.129244041	0.13471165	0.134506312	0.134587787	0.135513824	0.138606387	0.131978448	0.140439187	0.138471743	0.136636015	0.137342102	0.136616435
351	0.125844266	0.126014062	0.126433573	0.126040014	0.126195868	0.12597716	0.126288658	0.126806406	0.128029564	0.126638859	0.126159915	0.126125789	0.126881397	0.128707725	0.131031475	0.127825266	0.127483028	0.128406187	0.126322305	0.127361691	0.130175013	0.132211946	0.133264267	0.127407696	0.127744887	0.127775857	0.136515046	0.138798705	0.137954752	0.142268646	0.134517709	0.140101168	0.129307095	0.127535184	0.129618968	0.128351869	0.128463105	0.131941481	0.137661278	0.137456779	0.137524978	0.138490286	0.141711626	0.134799099	0.143692776	0.141591798	0.139686551	0.140427313	0.13965011
352	0.128372287	0.128563836	0.128993928	0.128578287	0.128726699	0.128530841	0.128849221	0.129359597	0.13056955	0.129225104	0.128739853	0.128688379	0.129469798	0.131349111	0.133757604	0.130471995	0.130108095	0.131074375	0.128917556	0.129978499	0.132903177	0.134994706	0.136094048	0.130032276	0.130388541	0.13040329	0.13949438	0.141887147	0.141003964	0.145530647	0.137419974	0.143270996	0.131998125	0.130171825	0.132313163	0.131013868	0.131117205	0.134702599	0.140703372	0.140499416	0.140553229	0.141562348	0.144928203	0.137696873	0.14707562	0.144824837	0.142841488	0.143621048	0.142786216
353	0.130945479	0.131160887	0.131602483	0.131162684	0.131302876	0.131132194	0.131458058	0.131960155	0.133155181	0.131862141	0.131370127	0.131299578	0.132109173	0.134046334	0.136547779	0.133175349	0.132787695	0.133801251	0.131564653	0.132649089	0.135695801	0.137847181	0.138998301	0.13271141	0.133088596	0.133085489	0.142563926	0.145077956	0.144151176	0.148915302	0.140404916	0.146552899	0.134749951	0.132864258	0.135068411	0.133733962	0.133828594	0.137530987	0.143843238	0.143639503	0.143677758	0.144735488	0.148262501	0.140676164	0.150595187	0.148177356	0.146106835	0.146929556	0.146030636
354	0.133566425	0.133807988	0.134262102	0.13379588	0.133926988	0.133784005	0.134118043	0.134610666	0.135788763	0.134553102	0.13405387	0.13396241	0.134802719	0.13680294	0.139406161	0.135938925	0.135525271	0.136590571	0.134266862	0.13537687	0.138557083	0.140773961	0.141981982	0.135448566	0.135848659	0.135825937	0.145729897	0.148378373	0.147403261	0.152431635	0.143478201	0.149954984	0.137566482	0.135616058	0.137888642	0.136515868	0.136600935	0.140431007	0.147087779	0.146883881	0.14690535	0.148016887	0.151723152	0.14374248	0.154261723	0.151658115	0.149490555	0.150361169	0.149391161
355	0.136240898	0.136511351	0.136979173	0.136483834	0.13660482	0.136492564	0.136835592	0.13731725	0.138475947	0.13730499	0.136798043	0.136683488	0.137557543	0.139627105	0.142342971	0.138771039	0.138328684	0.139451148	0.137031497	0.138169582	0.141497285	0.143786758	0.145058128	0.138251661	0.138677061	0.138632605	0.149010215	0.151810675	0.150780925	0.156110119	0.14665565	0.153503335	0.140457038	0.138435455	0.140783253	0.13936828	0.139442767	0.143413551	0.150458032	0.150253066	0.1502566	0.151428863	0.155339258	0.146910963	0.158110901	0.155296357	0.153018043	0.153942889	0.152892562
356	0.138972706	0.139275072	0.139757913	0.139230485	0.139340189	0.139262004	0.13961494	0.140083851	0.141220322	0.140122423	0.139607249	0.139467213	0.140378343	0.142524155	0.145364699	0.141677101	0.141203073	0.142388681	0.13986338	0.141032299	0.144522932	0.146892897	0.148234799	0.141125871	0.141579225	0.141510699	0.15241559	0.155387878	0.154296352	0.159968015	0.149946831	0.157212962	0.143427604	0.141327811	0.143758274	0.142296827	0.142359622	0.146485489	0.153966331	0.153759149	0.153743596	0.154984409	0.159127312	0.15019082	0.162162731	0.159108711	0.156703958	0.15769022	0.156549151
357	0.141764633	0.142102142	0.142601406	0.142038711	0.142135889	0.142095332	0.142459183	0.142913278	0.144024405	0.143008778	0.142484864	0.142316834	0.143268562	0.145497925	0.148475885	0.144661003	0.144152162	0.145407247	0.142766034	0.143968703	0.147638608	0.150097417	0.151517462	0.144074947	0.144559056	0.144463986	0.155952975	0.159118172	0.157957291	0.164015705	0.153358052	0.161093109	0.146482434	0.144296996	0.146817979	0.145305542	0.145355474	0.149651594	0.157620471	0.157409835	0.157373997	0.158691663	0.163097239	0.153588171	0.166429067	0.163105231	0.160557365	0.161612676	0.160369794
358	0.144622398	0.144998749	0.145516039	0.14491444	0.144997655	0.144998809	0.145374737	0.145811558	0.146893697	0.145971111	0.145437909	0.145239026	0.146235401	0.148556763	0.151687091	0.1477312	0.147183926	0.148515833	0.145746859	0.146986661	0.150854873	0.153412493	0.154919751	0.147106937	0.147625041	0.147500582	0.159641494	0.163025728	0.161786085	0.168287146	0.156906081	0.165172402	0.149631066	0.147351394	0.149972004	0.148403291	0.148439037	0.152923123	0.161443279	0.161227244	0.161170139	0.162574982	0.16728159	0.157118994	0.17094992	0.16731839	0.164606049	0.165739923	0.16438159
359	0.147552565	0.147972001	0.148509149	0.147864471	0.147932068	0.147979627	0.148368972	0.148785633	0.149834545	0.149017546	0.148474466	0.148241459	0.149287151	0.151710333	0.155010644	0.150897473	0.150307582	0.15172486	0.148814381	0.150095255	0.154184044	0.156852403	0.158457712	0.150231141	0.150787001	0.150629869	0.163503892	0.167139505	0.165809447	0.17282343	0.160610794	0.1694853	0.152884584	0.150500707	0.15323155	0.151600353	0.151620409	0.156313239	0.165462084	0.165237802	0.165158761	0.166663594	0.171719769	0.160802189	0.175773834	0.171787429	0.168883416	0.170107696	0.168617123
360	0.150559214	0.151026298	0.151585274	0.150893029	0.150943219	0.151042228	0.151446445	0.151839736	0.152850792	0.152153074	0.151599509	0.151328883	0.152428902	0.154964446	0.158453713	0.154165712	0.153528715	0.155040552	0.151973823	0.153300001	0.157633313	0.160425298	0.16214037	0.153453191	0.154050847	0.153857515	0.167552406	0.171474622	0.170041456	0.177645133	0.164483045	0.174049435	0.156249553	0.153750778	0.156603234	0.154902875	0.154905637	0.159829543	0.169691197	0.169455468	0.169353884	0.170972665	0.176431486	0.164648162	0.180924831	0.176532098	0.173406638	0.17473423	0.173093153
361	0.153650903	0.15417103	0.154754177	0.154009044	0.154039708	0.15419611	0.154616968	0.154982892	0.155950532	0.155388718	0.154824014	0.1545117	0.155672042	0.158332715	0.162034351	0.157549547	0.156860092	0.158477587	0.155236865	0.156613506	0.161220537	0.164152504	0.165992121	0.156786027	0.157430333	0.157196626	0.171823551	0.176079501	0.174526207	0.182825246	0.168554119	0.178923911	0.159741775	0.15711519	0.160103092	0.158325329	0.158308965	0.163491386	0.174176276	0.173923752	0.173800135	0.175551724	0.181487338	0.168686389	0.186490318	0.181621514	0.178232594	0.17968097	0.177865147
362	0.156833251	0.15741229	0.15802216	0.157218345	0.15722717	0.157447432	0.15788687	0.158220992	0.15913911	0.158731475	0.158154949	0.157796541	0.159023739	0.161823494	0.165763212	0.16105741	0.16030966	0.16204495	0.158610864	0.160043613	0.164956342	0.168046361	0.170026839	0.160237675	0.160933934	0.160655305	0.176337064	0.180979396	0.179286957	0.188399962	0.172841228	0.184138872	0.163370811	0.160602317	0.163740789	0.161876579	0.161839111	0.167310131	0.178941171	0.178665654	0.178520851	0.180426339	0.186922141	0.172933232	0.192513123	0.187090178	0.183390466	0.184979174	0.182961573
363	0.160115911	0.160760771	0.161400408	0.160531058	0.160515318	0.160806995	0.161267391	0.161564153	0.162425464	0.162194173	0.161605101	0.161195534	0.162497408	0.165453163	0.169662724	0.16470549	0.16389252	0.165760234	0.162109523	0.163605274	0.16886268	0.172133814	0.174275827	0.163823509	0.164578071	0.164249175	0.18114213	0.186242022	0.184384671	0.1944773	0.177385659	0.189778732	0.167155811	0.164228374	0.167535837	0.165573974	0.165513191	0.17130989	0.184049799	0.183741179	0.183578477	0.185666849	0.192841701	0.177427378	0.199123917	0.19303944	0.188960851	0.190716723	0.188461052
364	0.16350583	0.164224067	0.164896807	0.163954418	0.163911129	0.164282478	0.164766454	0.16501967	0.165816148	0.16578568	0.165183303	0.16471707	0.1661022	0.169232592	0.173747166	0.168504676	0.167618891	0.169635134	0.165742222	0.167308585	0.172953686	0.176431656	0.178758232	0.167553879	0.168373726	0.167988713	0.186267181	0.191904951	0.189853601	0.201113779	0.182211807	0.195889239	0.171109333	0.168004207	0.171500969	0.169429048	0.169342561	0.175505946	0.189537624	0.18918413	0.189007687	0.19131171	0.199300799	0.182191864	0.206390295	0.199522799	0.194987769	0.19694115	0.194406523
365	0.167013953	0.167814354	0.168524137	0.167499933	0.167425623	0.167886175	0.168396901	0.16859899	0.169321218	0.169520784	0.168904305	0.168375157	0.169853717	0.173181115	0.178043647	0.172473889	0.171506374	0.173690344	0.16952484	0.171171	0.177255665	0.180972867	0.183512822	0.171446754	0.172340155	0.171892229	0.191775458	0.198057825	0.195773752	0.20845892	0.187371813	0.202583847	0.175254085	0.17194883	0.175659393	0.173462205	0.173347392	0.179927524	0.195489414	0.195073112	0.194891277	0.197455314	0.206447728	0.187275441	0.214494357	0.206679442	0.201578803	0.203770636	0.200902965
366	0.170650676	0.171543185	0.172294515	0.171178527	0.171069267	0.17162975	0.172170906	0.172312992	0.172950252	0.173413486	0.17278207	0.172183063	0.173766721	0.177317014	0.182577776	0.176631008	0.175571608	0.177945413	0.173472398	0.175209023	0.18179345	0.185788599	0.188576232	0.175519116	0.176495555	0.175977028	0.197726872	0.204785841	0.202221092	0.216655787	0.192914938	0.209970511	0.179611516	0.176080209	0.180033028	0.177692723	0.177546743	0.184602235	0.201985803	0.201482749	0.201308017	0.204187628	0.214424906	0.192724219	0.223610386	0.214642323	0.208836182	0.211317607	0.208050154
367	0.174428955	0.175425052	0.176223208	0.17500386	0.174855119	0.175527827	0.176103811	0.176175202	0.176715052	0.177481651	0.176834428	0.176157749	0.177860267	0.181664355	0.187384304	0.180999265	0.179836135	0.18242596	0.177604192	0.179444066	0.186600375	0.190921784	0.19399968	0.179793039	0.180863682	0.180265678	0.20420888	0.212217371	0.209309034	0.225929993	0.198911579	0.218214367	0.184210037	0.180421793	0.184651023	0.182145863	0.181965649	0.189567688	0.209148573	0.20852425	0.208376845	0.211646256	0.223459968	0.198603994	0.234014847	0.223619402	0.21691513	0.219754102	0.215999642
368	0.178363087	0.179476015	0.180327189	0.178991043	0.178797601	0.179596601	0.180212667	0.180200522	0.18062857	0.181745294	0.181081363	0.180318261	0.182155902	0.186250766	0.192504054	0.185605014	0.184324333	0.187161233	0.181941944	0.183900405	0.191715217	0.196423481	0.199844815	0.184293571	0.185471581	0.184783857	0.211330753	0.220517434	0.217182198	0.236584194	0.205447769	0.227530247	0.189082365	0.185000267	0.189547061	0.186850462	0.186632762	0.194868227	0.217134786	0.216339232	0.216251156	0.220010887	0.233863094	0.20499535	0.246080216	0.233887237	0.226016017	0.229303866	0.224947137
369	0.182469249	0.183714323	0.184625811	0.183157215	0.182913046	0.183854461	0.184516912	0.184405772	0.184705339	0.186227452	0.185545886	0.184686577	0.186678676	0.191108887	0.197986451	0.190478976	0.189064556	0.192185571	0.186510777	0.188606332	0.197184419	0.202356289	0.206188152	0.189049943	0.190350915	0.189561614	0.219233234	0.229904451	0.226030569	0.249034973	0.212631816	0.23820547	0.194267281	0.189846864	0.194761206	0.191840383	0.19158181	0.200557757	0.22615319	0.225113546	0.22513485	0.2295232	0.246067987	0.212000072	0.26032044	0.245823379	0.236404779	0.240265913	0.235152487
370	0.186765934	0.188160943	0.189141393	0.187522025	0.187220144	0.188322517	0.189038961	0.188810116	0.188961822	0.190954961	0.190254821	0.189288397	0.191458151	0.196277963	0.203892622	0.195657485	0.194090251	0.197539927	0.19134013	0.193595301	0.203064684	0.208798771	0.213127102	0.194096762	0.195539322	0.194634651	0.228103302	0.240677694	0.236112313	0.263878158	0.220603602	0.250637932	0.199811562	0.19499869	0.200341998	0.197156007	0.196853149	0.206703299	0.236491469	0.235099597	0.235308991	0.240520761	0.260706493	0.219750383	0.277471684	0.259962814	0.248446395	0.253053786	0.24697243
371	0.191274561	0.192840293	0.193900042	0.192108302	0.191740569	0.193025323	0.193805027	0.193435673	0.193416898	0.195959574	0.195239925	0.194154269	0.19652983	0.201806159	0.210300009	0.201184249	0.199441533	0.203274035	0.196465068	0.198907556	0.209426754	0.215852094	0.220789119	0.199475723	0.201082343	0.200046145	0.238197214	0.25326072	0.247789784	0.281992866	0.229548662	0.265396471	0.205772789	0.200500609	0.206349494	0.202846378	0.202495992	0.213390331	0.248559973	0.246651744	0.247174629	0.253491598	0.278728688	0.228423174	0.298619253	0.27708769	0.262657662	0.268257447	0.260912126
372	0.196019857	0.197780706	0.198932195	0.19694248	0.196499373	0.197991334	0.198845656	0.198307861	0.198092128	0.201278748	0.200538684	0.199320432	0.201936318	0.207752641	0.21730704	0.207111733	0.205166422	0.209448241	0.20192724	0.204591425	0.216359012	0.223647071	0.229341807	0.205236973	0.207035013	0.205848249	0.249868419	0.268256408	0.261574721	0.304675888	0.239713967	0.283298157	0.21222189	0.206406784	0.212858095	0.208971003	0.208570328	0.220728355	0.262948829	0.260271325	0.261308807	0.269146017	0.301560706	0.238256487	0.325357113	0.29834289	0.27977409	0.286721822	0.277690226
373	0.201030845	0.203015642	0.204273994	0.2020557	0.201526003	0.203254101	0.204197098	0.203456352	0.203012507	0.206957583	0.206196264	0.204830847	0.207730032	0.214192277	0.225043325	0.213504423	0.211323747	0.216137683	0.207777215	0.210706341	0.223975442	0.232359391	0.239014608	0.2114423	0.213465531	0.212105561	0.263626446	0.286560885	0.278222426	0.333899616	0.251441788	0.305568259	0.219248848	0.212784243	0.219962857	0.215603976	0.215151299	0.228863014	0.280548566	0.276701726	0.278582955	0.28856517	0.331400272	0.24958458	0.360080881	0.325463056	0.30089019	0.309708593	0.298374643
374	0.206341406	0.208584396	0.209968131	0.20748445	0.206854888	0.208852951	0.20990215	0.208915573	0.208206842	0.21305013	0.212266826	0.210738662	0.213975331	0.221219799	0.233679718	0.220441293	0.217985309	0.2234357	0.214076132	0.21732516	0.232423007	0.242225215	0.250121713	0.2181676	0.220458176	0.218897869	0.280202635	0.309488731	0.298836689	0.372529997	0.265206607	0.334017179	0.22696774	0.219715677	0.227785217	0.22283733	0.222332868	0.237988345	0.302693498	0.297039137	0.300304057	0.313369173	0.371450202	0.262876206	0.406178376	0.360983865	0.327620077	0.339072139	0.324535802
375	0.211991642	0.214533787	0.216065815	0.213272093	0.212526852	0.214834636	0.216012102	0.214725965	0.213708732	0.219622291	0.218816454	0.217109395	0.220753	0.228958201	0.243447992	0.228021027	0.225240508	0.231460856	0.220899302	0.224539046	0.241896278	0.253571274	0.26310568	0.225508055	0.228119381	0.226325895	0.300669734	0.338981756	0.325051665	0.424498781	0.281687148	0.37132889	0.235526872	0.227305304	0.236484423	0.230787977	0.230235343	0.248370444	0.331418662	0.322932555	0.328468476	0.345996264	0.426053666	0.278806176	0.467999413	0.408481303	0.362377889	0.377543164	0.358512111
376	0.218029369	0.220920032	0.22262901	0.219470568	0.218590668	0.221255148	0.222588948	0.220935323	0.219557593	0.226755276	0.225926632	0.224024862	0.228165995	0.237570054	0.25466833	0.236368575	0.233202102	0.240366009	0.228340589	0.232463651	0.252657379	0.266857125	0.278598576	0.233584714	0.236585516	0.234518666	0.326599287	0.377820358	0.359242618	0.494275765	0.301873666	0.421313796	0.245122267	0.235686368	0.246272973	0.239606661	0.239015246	0.260380408	0.369786959	0.35684452	0.366088584	0.38998361	0.499934944	0.298354376	0.549561781	0.472392782	0.408694201	0.428963227	0.40370423
377	0.224511933	0.227811065	0.229733236	0.22614247	0.22510496	0.228181934	0.229708147	0.227600376	0.225799848	0.234550058	0.233698751	0.231588413	0.236347301	0.247273366	0.267788369	0.245643912	0.242013902	0.25035065	0.236518214	0.241247452	0.265063949	0.282734493	0.297505837	0.242553395	0.246033461	0.243643592	0.360235575	0.429654541	0.404663579	0.58434952	0.327227354	0.488713865	0.256016265	0.24503136	0.257438081	0.24949021	0.248878926	0.274540046	0.422151254	0.402300392	0.417467381	0.449962615	0.595074216	0.322934495	0.650222131	0.556443871	0.47130191	0.498033267	0.464650405
378	0.231508693	0.235289706	0.237471452	0.233363912	0.232140803	0.235696924	0.23746244	0.234788894	0.232490531	0.24313368	0.242260487	0.239932483	0.245471341	0.258364791	0.283439664	0.256054592	0.251861801	0.261678566	0.245583037	0.25108383	0.279609575	0.302130436	0.321117349	0.252617575	0.256695848	0.253921127	0.404602072	0.49838198	0.46521767	0.689393374	0.359907657	0.577417007	0.26856397	0.255566856	0.270372365	0.260699146	0.260102247	0.291584311	0.493840778	0.463840937	0.487940169	0.53056743	0.704055624	0.35454242	0.757179413	0.659081687	0.555082236	0.588368399	0.546057106
379	0.239104338	0.243457954	0.245959373	0.241228375	0.239785223	0.243900589	0.245967063	0.242582445	0.239695346	0.252668088	0.251774806	0.249229479	0.255770615	0.271253577	0.302517251	0.267873584	0.262989525	0.274702804	0.255730416	0.262228546	0.296981361	0.326356387	0.35123353	0.264047069	0.26888292	0.265646143	0.463249104	0.585775883	0.544063837	0.789765924	0.403042649	0.684796851	0.283249745	0.267595059	0.285616343	0.273582807	0.273058737	0.312537438	0.58872193	0.54575589	0.581599697	0.632416169	0.80407886	0.395854409	0.843410574	0.765842947	0.660527214	0.69652804	0.648670364
380	0.247403205	0.252442603	0.25534253	0.249851753	0.248145754	0.252917213	0.255366661	0.25107983	0.247493226	0.263362182	0.262452335	0.259707118	0.267559158	0.286508571	0.326278181	0.281463474	0.275720206	0.289898528	0.267216706	0.275024203	0.318134623	0.357217515	0.390230019	0.277204169	0.283012313	0.279217976	0.538897776	0.6861739	0.639685148	0.857548226	0.460820854	0.79269706	0.300731812	0.281523794	0.303910097	0.288612937	0.28825713	0.338771444	0.701966394	0.647622774	0.694336619	0.743917156	0.866608648	0.450026865	0.885292065	0.848670634	0.773968084	0.803065849	0.760286307
381	0.256535021	0.262402772	0.265805809	0.259379102	0.257356542	0.262901892	0.265844635	0.260401487	0.255979606	0.275488378	0.274568658	0.271670254	0.281265465	0.304920328	0.356435881	0.297308497	0.290485588	0.307903362	0.280382469	0.289934278	0.344377049	0.397039934	0.440859218	0.292579978	0.299648396	0.295182224	0.629880786	0.781106501	0.739657437	0.878869977	0.53765674	0.869467306	0.321887166	0.29790752	0.326243404	0.306426087	0.306387939	0.37196591	0.810472459	0.755987951	0.804061138	0.836973448	0.881295006	0.519636567	0.882880902	0.885435849	0.863560606	0.876121034	0.851192723
382	0.266662748	0.273540184	0.277586516	0.269993885	0.267586683	0.274050037	0.277635995	0.270695262	0.265270681	0.289405512	0.288488779	0.2855322	0.297477975	0.327575495	0.395175363	0.316054974	0.307864482	0.329560935	0.295685296	0.307589719	0.37742984	0.448404424	0.50536225	0.310843942	0.319551569	0.314287323	0.724794914	0.845191327	0.819864057	0.862714893	0.634639849	0.895538151	0.347837003	0.317501273	0.35387678	0.327871686	0.328373978	0.413819837	0.879988475	0.841994381	0.876396724	0.884122996	0.860215802	0.603901026	0.852109714	0.878681787	0.902045242	0.898075125	0.893823329
383	0.277992958	0.286112731	0.290991548	0.2819302	0.279051294	0.286609797	0.291044366	0.282143657	0.275508758	0.305589014	0.304700403	0.301857747	0.317002938	0.355921923	0.444899503	0.338556014	0.328628912	0.35595447	0.313743948	0.32884777	0.419369285	0.513167284	0.583301323	0.3329055	0.343732232	0.33755331	0.802055455	0.865736365	0.859673111	0.82486899	0.741742945	0.879448593	0.379917154	0.341323665	0.38828372	0.354053464	0.355408835	0.465367068	0.895804685	0.881137941	0.894957395	0.883273974	0.819278267	0.694282847	0.806571549	0.844977036	0.892571669	0.879219268	0.88852556
384	0.290789815	0.30045255	0.306420038	0.295489194	0.292026443	0.300898501	0.306464651	0.29497306	0.286869113	0.324670188	0.323858748	0.321420975	0.340931389	0.391772936	0.507364541	0.365913828	0.353795398	0.388413003	0.335395937	0.354860511	0.472251055	0.590286455	0.668196247	0.359982801	0.373500389	0.366343105	0.842690823	0.850380278	0.85843575	0.775859696	0.832788134	0.839781723	0.419558376	0.370720265	0.430962681	0.386345946	0.388961256	0.525950943	0.871969983	0.874863136	0.872736093	0.851489935	0.768223173	0.772907745	0.753767919	0.797404235	0.855263215	0.838066944	0.853985819
385	0.305393925	0.316989889	0.324392775	0.311060997	0.306869264	0.317324168	0.324412732	0.309465392	0.299568741	0.347485176	0.346844331	0.345278154	0.370697998	0.437127559	0.581759607	0.399500522	0.384670096	0.428451244	0.361766221	0.387137175	0.537065145	0.672715768	0.745749592	0.393655376	0.410481165	0.402400149	0.844785178	0.813499245	0.829524112	0.721369914	0.880572034	0.788613413	0.468016112	0.407398743	0.483040836	0.426344253	0.43069745	0.592188171	0.827502162	0.840476337	0.829030423	0.803892528	0.712227212	0.821129381	0.697703288	0.743040861	0.804643922	0.786126128	0.805056822
386	0.322246229	0.336282158	0.345586636	0.329152074	0.324043399	0.336411381	0.345560751	0.325971506	0.313876746	0.375124674	0.374825459	0.374840478	0.408074031	0.493564078	0.661901407	0.440895515	0.422842476	0.477532052	0.394324845	0.427537751	0.611703029	0.746343812	0.799099276	0.43582257	0.456497705	0.447743103	0.819495991	0.765242956	0.785404962	0.664470422	0.881225672	0.732055333	0.525794928	0.453341653	0.544501218	0.475630724	0.482187054	0.657501638	0.773195687	0.791842732	0.775058046	0.748595548	0.65406352	0.832858966	0.640478974	0.685641121	0.747855229	0.729200001	0.749309775
387	0.341918824	0.359048102	0.370870647	0.350419036	0.344151474	0.358831447	0.370775272	0.344926619	0.330127086	0.408960187	0.409302551	0.411905614	0.454966581	0.560862925	0.734846266	0.49158811	0.470010296	0.536404576	0.434874983	0.478038963	0.688446511	0.795513468	0.819517293	0.488381745	0.513086603	0.504171415	0.778427825	0.711261457	0.733446817	0.606772002	0.850542494	0.673254439	0.591504579	0.510360737	0.612812882	0.535097522	0.544095907	0.713041708	0.714344922	0.736289488	0.716311252	0.689765685	0.595176537	0.815552063	0.583163845	0.627144243	0.688498183	0.67026738	0.690594681
388	0.365147983	0.386194951	0.401319661	0.375700454	0.367968748	0.385426302	0.401136203	0.366863391	0.348731552	0.450560237	0.452043914	0.458509687	0.512750853	0.634821408	0.785404032	0.55214023	0.527363021	0.603698334	0.485295593	0.5399081	0.753938278	0.81284539	0.810457071	0.552239075	0.580227605	0.57193406	0.728896154	0.654642708	0.677681012	0.549127405	0.803617666	0.61380388	0.660239676	0.578815091	0.681382488	0.603466606	0.61451132	0.750700397	0.653664296	0.677628977	0.655607604	0.629560258	0.536343985	0.780053968	0.526304698	0.568551739	0.628376592	0.610825719	0.630874982
389	0.39285975	0.418812289	0.438154077	0.406028402	0.396465483	0.417204218	0.437887646	0.392415956	0.370190554	0.501316043	0.504709736	0.516310459	0.580785086	0.705629264	0.805331766	0.620506833	0.594146199	0.673929306	0.54669572	0.611807411	0.794986948	0.802161579	0.781086242	0.625240635	0.654049207	0.647281403	0.675038869	0.597046083	0.620293151	0.492005766	0.748718506	0.554514473	0.722803629	0.655092571	0.739716313	0.675131593	0.686734452	0.766647735	0.59252078	0.617853272	0.594369839	0.569093969	0.478025795	0.734247561	0.470191758	0.510399484	0.568386618	0.551633607	0.571140899
390	0.426156386	0.458060373	0.48247944	0.442566517	0.430778839	0.455246683	0.482196038	0.422296503	0.395094147	0.561418306	0.56772447	0.584957666	0.654048589	0.760101059	0.797259246	0.68987627	0.665323109	0.736669424	0.61745311	0.686927987	0.80667764	0.772185599	0.739425322	0.699466149	0.724677902	0.720088355	0.619153498	0.539362933	0.562452559	0.43571863	0.690067118	0.495824043	0.768253784	0.728920662	0.77747664	0.739193866	0.748901874	0.762287034	0.531633649	0.558002248	0.533347171	0.508982516	0.420585603	0.682824508	0.415043994	0.453018491	0.508998276	0.49309765	0.511917995
391	0.466181018	0.504831728	0.534686422	0.486368555	0.472041624	0.500421647	0.534560203	0.45720627	0.424090126	0.628193763	0.638298483	0.659665235	0.722086317	0.7883719	0.769184608	0.748894696	0.730577896	0.780054055	0.690858462	0.752496717	0.793014835	0.730514962	0.690797265	0.761612603	0.77841287	0.776019876	0.562544648	0.482118323	0.504829365	0.380601944	0.629928082	0.438038132	0.789291116	0.785377258	0.789783146	0.783207334	0.78873182	0.741893911	0.471454356	0.498674409	0.473009981	0.449648338	0.364475328	0.628558183	0.361173664	0.396727676	0.450517526	0.435503164	0.453546163
392	0.513746922	0.558999272	0.593318367	0.537800007	0.520936485	0.55273777	0.593654549	0.497627263	0.457799881	0.694201394	0.708044313	0.729174965	0.771500327	0.789201209	0.728821803	0.785895904	0.776962257	0.797036333	0.754234643	0.794401494	0.762018142	0.682114472	0.638341625	0.798550023	0.804638879	0.80380348	0.505929554	0.425678483	0.447841581	0.327186855	0.56942439	0.381498176	0.785863595	0.812639963	0.779025064	0.799915434	0.800453122	0.710211917	0.412365201	0.44025851	0.413752718	0.39150914	0.31041596	0.572984653	0.309156635	0.342003693	0.393254716	0.379179501	0.396351145
393	0.568452362	0.618103478	0.653661685	0.595387583	0.576701539	0.610172056	0.654804192	0.543368895	0.49659409	0.747972963	0.76381236	0.77897264	0.793552319	0.768373494	0.681215021	0.795985384	0.796435113	0.789025585	0.794238698	0.80632856	0.720334062	0.62994056	0.583903072	0.805835315	0.802483539	0.802384878	0.449775819	0.370464185	0.391887996	0.276375021	0.509187833	0.326774409	0.763260985	0.809819039	0.751310167	0.791042102	0.787266699	0.670948615	0.354891975	0.383157303	0.356108573	0.335186674	0.259558887	0.516998701	0.259992228	0.289665295	0.337717456	0.324690937	0.340837946
394	0.62746519	0.676359029	0.707683267	0.654636941	0.635896415	0.667661397	0.70979441	0.592940855	0.540210973	0.779205406	0.794163684	0.799553749	0.788315233	0.733058166	0.629484736	0.782179607	0.789591856	0.762307282	0.804746715	0.79174666	0.672358389	0.575792702	0.528600919	0.788072541	0.778322353	0.778360297	0.394508984	0.317120468	0.337525495	0.22949792	0.449661396	0.274814896	0.727677439	0.784116812	0.712498085	0.763299755	0.756398944	0.626742234	0.299875933	0.327968976	0.300922095	0.281666306	0.213475847	0.461184089	0.215112593	0.240967298	0.284767793	0.272984228	0.287848184
395	0.684311885	0.724911783	0.746155359	0.707521194	0.691413405	0.717032049	0.7490173	0.642767268	0.587119063	0.784446843	0.796159409	0.791791423	0.762509133	0.688790704	0.575473218	0.751603167	0.763209769	0.723586238	0.789507719	0.75912	0.62074528	0.520724853	0.473119835	0.753637233	0.740134689	0.740002803	0.340689132	0.266681281	0.28564463	0.188205539	0.391284165	0.227050298	0.683960916	0.744260699	0.666805013	0.723629333	0.714557524	0.579354844	0.248629913	0.275671341	0.249506031	0.232412578	0.173901971	0.406009579	0.176175724	0.197560156	0.235754742	0.225490736	0.238696194
396	0.729845423	0.755361797	0.763261488	0.744958574	0.734029943	0.749906046	0.766377377	0.687127842	0.633890897	0.767598435	0.775189057	0.763286449	0.723392752	0.639094821	0.520326441	0.710488786	0.724302366	0.677559372	0.756555481	0.715562388	0.567136347	0.465434336	0.418000745	0.709131525	0.69358064	0.693129187	0.289195854	0.220612119	0.237573591	0.153940925	0.334703328	0.185211182	0.635304644	0.696186896	0.616965122	0.676780358	0.666164738	0.52998294	0.202886319	0.227706331	0.203592888	0.189204241	0.14205154	0.352047352	0.144444509	0.161041339	0.192399503	0.183936336	0.195074936
397	0.755955142	0.763671469	0.75874591	0.760951507	0.756372888	0.761521952	0.761637912	0.719572021	0.675298042	0.735293703	0.739002514	0.721889574	0.676253095	0.586224463	0.464821207	0.663097107	0.677895426	0.627265204	0.712876111	0.665692119	0.512568102	0.410497196	0.363834305	0.658795733	0.642222795	0.641369907	0.241311046	0.180578971	0.194957618	0.127331372	0.280933378	0.150792777	0.583784799	0.643509479	0.564753744	0.625782295	0.614016474	0.479482358	0.164383442	0.185791353	0.164926087	0.153604976	0.118073552	0.300132487	0.120234979	0.132309539	0.156316553	0.149799513	0.158607125
398	0.759706496	0.75162843	0.736813983	0.755395885	0.756612702	0.752730693	0.739234677	0.735436919	0.705466353	0.693260931	0.69367084	0.672915881	0.624347457	0.531584135	0.409594046	0.612036808	0.627071889	0.574559416	0.66291863	0.612220198	0.457728817	0.356562885	0.311447046	0.605139694	0.588179813	0.586876391	0.198657052	0.147889757	0.159326041	0.107850851	0.231478509	0.124326303	0.530696387	0.588332938	0.51129222	0.572470485	0.559806386	0.428534854	0.134114149	0.151375517	0.134510307	0.126208965	0.100980693	0.251502847	0.102761387	0.111075089	0.128263403	0.123585396	0.130111765
399	0.743657146	0.724102626	0.702644615	0.732436239	0.73797438	0.72787877	0.704550675	0.733656038	0.720142215	0.645322749	0.642993055	0.619570028	0.569721012	0.476133644	0.355360616	0.558952253	0.573764352	0.520623743	0.609385067	0.556830352	0.403215565	0.304529709	0.262025481	0.549729985	0.532779695	0.531000826	0.162763465	0.122884322	0.131427221	0.094234027	0.188150442	0.105164489	0.476913494	0.531962759	0.457372111	0.518010935	0.504624274	0.377824669	0.111827674	0.124951634	0.112105957	0.106381984	0.089287047	0.207737884	0.090677297	0.096148679	0.107783626	0.104627369	0.109211815
400	0.712993011	0.686102169	0.660484981	0.697306754	0.705688422	0.691905843	0.66193037	0.716395329	0.718194095	0.593893808	0.589284194	0.563815154	0.513691264	0.420640528	0.303079606	0.504893382	0.519200079	0.466253029	0.55394422	0.500597669	0.349717687	0.255654004	0.217109329	0.493574138	0.476894702	0.474639325	0.134460546	0.104827332	0.110895424	0.08505517	0.152526514	0.091917387	0.423114687	0.475251605	0.403663664	0.463191676	0.449238826	0.328168241	0.096256974	0.105851157	0.096449063	0.092691685	0.081561044	0.170428888	0.082613183	0.08604783	0.093549621	0.091532219	0.094631067
401	0.672651044	0.64138555	0.613257677	0.654278851	0.664424214	0.648707446	0.614319017	0.687332921	0.701477086	0.540490978	0.533971711	0.506890116	0.457169095	0.365890831	0.254071341	0.450575727	0.46419346	0.412076039	0.497645292	0.444273522	0.298186772	0.211525206	0.178330637	0.437394312	0.421190199	0.41848776	0.113468677	0.092342116	0.096499432	0.079103147	0.125194166	0.083081502	0.369969936	0.418854888	0.350894382	0.408646502	0.394317764	0.280620512	0.08578303	0.092654205	0.085915603	0.083569464	0.076679662	0.14057501	0.077458918	0.079459827	0.084013077	0.082805191	0.084830994
402	0.626240271	0.592508289	0.562925699	0.606325211	0.617527839	0.600986152	0.563675701	0.650015833	0.67323729	0.48612775	0.478005518	0.449677949	0.400936507	0.312865251	0.209956384	0.396613706	0.409404358	0.35875369	0.44124338	0.38853706	0.249925696	0.173750785	0.146878045	0.381869324	0.366344505	0.363266605	0.098666087	0.084005649	0.086773256	0.075457816	0.105518229	0.077406073	0.318304854	0.363453983	0.299998815	0.355054411	0.340621488	0.23649238	0.078970966	0.083847449	0.079063255	0.077708426	0.073818283	0.118163845	0.074384555	0.075375552	0.077847932	0.077206882	0.078473236
403	0.576074688	0.541107262	0.510771385	0.555346372	0.56714492	0.550482623	0.511270883	0.607174369	0.636781782	0.431545839	0.422101925	0.392949536	0.345857383	0.262879134	0.172357279	0.343706274	0.355534435	0.307154306	0.385424651	0.334195248	0.206558842	0.143402113	0.122954997	0.327831612	0.31323716	0.309911373	0.088601211	0.078653953	0.080428424	0.073466936	0.091995825	0.073980088	0.269245996	0.309947335	0.252238901	0.303316017	0.289174812	0.197252549	0.074751087	0.078182246	0.074815955	0.074159958	0.072401222	0.102194492	0.072803913	0.073080264	0.07407779	0.073835725	0.07456347
404	0.523665184	0.488298737	0.457716652	0.502616897	0.514695228	0.498371427	0.458014261	0.560702637	0.594689527	0.377461284	0.366997057	0.337608706	0.293072069	0.217570797	0.142282307	0.292821059	0.303524476	0.2584947	0.331035876	0.282367586	0.169668327	0.12050515	0.105730675	0.276443859	0.263105205	0.259721164	0.081998767	0.075443494	0.076509217	0.072666002	0.083022008	0.072163206	0.224260132	0.25960503	0.209169446	0.254689041	0.241370347	0.164170639	0.072376122	0.074758694	0.072422171	0.072260888	0.072019575	0.091254727	0.072298378	0.072068226	0.072018016	0.072057947	0.072402626
405	0.470097265	0.434939759	0.404542658	0.449087236	0.461215972	0.445531149	0.40467528	0.511945265	0.548849549	0.324741688	0.313624951	0.28484585	0.244065429	0.178606172	0.119721441	0.245277062	0.254658016	0.214315184	0.27923173	0.234538796	0.140229227	0.104156095	0.093864003	0.229232242	0.217531883	0.214325141	0.077880044	0.073762428	0.074320936	0.072716387	0.077286696	0.071493007	0.184947185	0.214044555	0.17232887	0.210745661	0.19885407	0.137890587	0.071310792	0.072929242	0.071343775	0.071534212	0.07237624	0.084024222	0.072562432	0.071972235	0.071175718	0.071415797	0.071487016
406	0.416222704	0.381800338	0.352057833	0.395562175	0.407546502	0.39271373	0.352052445	0.461866694	0.500605593	0.274553081	0.263258757	0.236216733	0.20057872	0.147162994	0.103697	0.202693857	0.210549003	0.176241179	0.231547662	0.192435042	0.11819412	0.092958298	0.085970094	0.187928302	0.178215084	0.175417256	0.075539932	0.073178561	0.073373246	0.073377966	0.073835091	0.071643962	0.152602217	0.174971139	0.142738638	0.173104927	0.163161146	0.118187486	0.071180742	0.072239922	0.071204553	0.071645371	0.073261265	0.079454726	0.073379201	0.072532816	0.07120471	0.071586992	0.071462616
407	0.36288405	0.329767622	0.301284383	0.342913351	0.35454695	0.340748508	0.301161525	0.411251221	0.450961159	0.228423092	0.21753483	0.193503117	0.164196513	0.123394773	0.092770141	0.166637216	0.172840613	0.145434845	0.189743969	0.157555156	0.102555795	0.085552858	0.080935403	0.153963424	0.14639893	0.144163571	0.074479887	0.073383985	0.073317706	0.074478831	0.072008132	0.072384208	0.127657571	0.143576242	0.120433476	0.142860697	0.135103155	0.104113814	0.071720574	0.072369134	0.071737863	0.072356715	0.074524697	0.076794403	0.0745933	0.073564642	0.071858779	0.072341952	0.072077586
408	0.311097836	0.27999777	0.25356333	0.292245151	0.303273914	0.290703501	0.253341891	0.360880904	0.400776048	0.188051438	0.178179472	0.158231115	0.135738437	0.106433367	0.085578616	0.138040067	0.142632118	0.12209654	0.155306552	0.130554692	0.091901843	0.080868858	0.07794594	0.127866441	0.122328418	0.120686263	0.074338578	0.074154772	0.0739012	0.07589363	0.07133822	0.073545174	0.109534948	0.120000332	0.104524376	0.120105439	0.114416666	0.094455291	0.072737976	0.073083926	0.072750531	0.073495838	0.076057451	0.075503843	0.076091409	0.074932751	0.072959068	0.073513734	0.073148995
409	0.262191646	0.233986952	0.210523257	0.244995259	0.255102415	0.243984853	0.210225429	0.311693172	0.350925586	0.154823984	0.146431062	0.131019546	0.114860612	0.094846408	0.081064047	0.116762091	0.119963846	0.1053929	0.128799672	0.110922401	0.084902077	0.078135462	0.076425043	0.109007724	0.105147282	0.10402646	0.074857479	0.075330918	0.074942971	0.077532876	0.071494624	0.075006524	0.096971003	0.103283286	0.093649592	0.103914057	0.099934741	0.088085395	0.07409601	0.074218426	0.074105038	0.074939923	0.07778194	0.075198138	0.077792691	0.076540833	0.074377944	0.074983156	0.074546308
410	0.217796085	0.193414358	0.173755254	0.202840363	0.211683129	0.202244396	0.17340796	0.264907184	0.302457725	0.129218244	0.122468213	0.111300318	0.100317666	0.087218715	0.078464752	0.101746032	0.103871392	0.093952308	0.109619735	0.097334946	0.080525355	0.076803277	0.075959762	0.096014751	0.093416521	0.092703916	0.075851131	0.076797815	0.076313555	0.07933287	0.072241786	0.076682305	0.088587857	0.091931222	0.086493132	0.092876829	0.09019259	0.084114748	0.075696948	0.07565408	0.07570325	0.076601408	0.079643235	0.075600707	0.079639717	0.078320297	0.076024184	0.07666508	0.076176233
411	0.179568012	0.159703114	0.144284304	0.167317064	0.174624018	0.167006235	0.143914847	0.222021329	0.256683252	0.110662523	0.105425007	0.09772152	0.090591156	0.082417771	0.07723221	0.091584766	0.092937682	0.086406278	0.096418778	0.088289537	0.078019632	0.076473261	0.07624933	0.087397342	0.085698434	0.085286284	0.077184503	0.078472245	0.077918863	0.08124787	0.073409128	0.078510399	0.08322463	0.084498306	0.082005243	0.085629412	0.083884179	0.08187677	0.077470119	0.077304836	0.07747421	0.078417113	0.081602135	0.076510142	0.081591356	0.080221822	0.077831792	0.078497991	0.077971262
412	0.148682469	0.133482516	0.122145412	0.139280326	0.144967052	0.139132652	0.121774287	0.184620111	0.21515107	0.097852558	0.093834981	0.088717059	0.084322416	0.079625402	0.076977885	0.084957175	0.085773481	0.081646308	0.087664833	0.082491637	0.076854254	0.076860937	0.077079371	0.081901504	0.080834768	0.080640091	0.078761314	0.08029525	0.079692091	0.083246012	0.074875445	0.080447133	0.080017261	0.079842913	0.079423395	0.081086114	0.080015869	0.080888953	0.079365731	0.079109644	0.079367922	0.080342672	0.08363156	0.077782832	0.083619076	0.08221098	0.079754278	0.080438645	0.07988382
413	0.125331813	0.114323153	0.106423036	0.118532364	0.122739491	0.118453206	0.106060034	0.153922066	0.179389816	0.089335584	0.086230288	0.082967913	0.080499498	0.078265932	0.077422315	0.080850061	0.081293998	0.07887262	0.082079044	0.078993531	0.076648864	0.077761685	0.078295935	0.078617489	0.077997457	0.07796041	0.080512539	0.082225021	0.081585717	0.085305197	0.07655385	0.082461858	0.078352357	0.077156933	0.07820625	0.078469409	0.077885679	0.08080046	0.081348715	0.081025081	0.08134917	0.082346969	0.085712918	0.079315577	0.085703205	0.084263832	0.081758945	0.082456705	0.081880424
414	0.108681272	0.101013665	0.095733098	0.103982104	0.106995845	0.103912943	0.095379429	0.130301263	0.150440622	0.083897121	0.081454851	0.079517519	0.078413415	0.077928946	0.078365168	0.078542782	0.078726444	0.077520191	0.078735763	0.07713264	0.07712944	0.079029034	0.079788888	0.076909208	0.076606178	0.07668332	0.082389152	0.08423232	0.083566362	0.087410444	0.078382492	0.084533451	0.077791877	0.075875561	0.077965562	0.077230641	0.076997509	0.081356893	0.08339476	0.083020653	0.083393537	0.084408546	0.08783378	0.081034616	0.087830532	0.086364091	0.083823192	0.084531278	0.083937903
415	0.097335562	0.092125985	0.088736004	0.094192579	0.096321692	0.094105441	0.08838909	0.113169968	0.128452146	0.08064841	0.078685838	0.077698602	0.07756373	0.078319185	0.079663153	0.077523391	0.077524606	0.07718384	0.076987667	0.076439434	0.078099077	0.080558142	0.081479455	0.076324833	0.076246659	0.076406032	0.084356575	0.086296947	0.085610825	0.089551859	0.080317593	0.086647626	0.078019735	0.07559572	0.078421202	0.076976301	0.076994988	0.082374769	0.085487268	0.08507519	0.085484349	0.086512864	0.089986098	0.082887414	0.089992464	0.088500944	0.085931669	0.086648244	0.086040489
416	0.08989322	0.086429459	0.084381979	0.087858908	0.08935706	0.087744336	0.084038939	0.101322357	0.112666238	0.078963668	0.077347844	0.077041486	0.077593708	0.0792264	0.081214466	0.077425076	0.077298514	0.077572774	0.076377655	0.076578275	0.079417654	0.082274474	0.083311795	0.076541189	0.076622295	0.076840413	0.08639081	0.088405272	0.087703321	0.091723232	0.082328623	0.088795052	0.07880975	0.076029053	0.079373196	0.077424191	0.077623167	0.083723188	0.087615236	0.087174327	0.087610546	0.088650386	0.092164989	0.084837026	0.092183759	0.090667541	0.088074293	0.088798399	0.088177789
417	0.085245175	0.083012491	0.081917419	0.083993766	0.085045945	0.083850866	0.08157623	0.093456315	0.101841162	0.078398014	0.077032075	0.077211654	0.078249542	0.080502006	0.082947108	0.077985144	0.077769137	0.078479779	0.076579485	0.077310077	0.080985857	0.084125464	0.085246759	0.077328231	0.077522151	0.077781843	0.088475526	0.090548406	0.089833416	0.093920995	0.084394651	0.090969959	0.080001413	0.0769707	0.080679839	0.07837345	0.07870115	0.085309332	0.089771677	0.089308623	0.089765094	0.090815168	0.094367832	0.086857842	0.09440158	0.092859876	0.090244759	0.090976068	0.090343271
418	0.082579799	0.081216056	0.08079717	0.081881557	0.082618465	0.081713263	0.080456635	0.088479988	0.094732127	0.078627019	0.077440886	0.077966523	0.079347783	0.082038603	0.084809113	0.079012819	0.078733944	0.079754647	0.077356211	0.078461806	0.082731659	0.086073347	0.087256417	0.078519463	0.078793522	0.079082328	0.090599505	0.092720615	0.091994239	0.096143357	0.086501197	0.093168955	0.081478405	0.078272409	0.082238457	0.079678549	0.080098014	0.087065963	0.091952281	0.091471912	0.091943649	0.093003659	0.096593527	0.08893184	0.096644717	0.095075845	0.092439289	0.093177935	0.092532977
419	0.08132257	0.080572781	0.08063319	0.081015594	0.08152942	0.080826254	0.080292756	0.08556934	0.090305079	0.079420017	0.078363277	0.079134951	0.080759146	0.083760482	0.086764184	0.080372891	0.080049581	0.081291012	0.078540294	0.079911202	0.084604326	0.088091955	0.089321628	0.079997217	0.080328412	0.080637297	0.092755538	0.09491864	0.094181714	0.098389922	0.088638811	0.095390508	0.083158462	0.079829328	0.083976528	0.081236473	0.081721209	0.088945812	0.094154827	0.0936606	0.094143958	0.095214176	0.098842172	0.091046944	0.098913244	0.097314842	0.094656075	0.095402528	0.094744959
420	0.081061844	0.08074599	0.081145893	0.081031628	0.081387504	0.08082563	0.08080533	0.084126826	0.087787336	0.080612137	0.079648798	0.080595331	0.082391871	0.085614205	0.088787186	0.081968974	0.081613919	0.083013253	0.080012486	0.081571292	0.086568371	0.090163408	0.091429531	0.081677833	0.082050072	0.082372473	0.094939287	0.097140984	0.096393749	0.100661297	0.090801573	0.09763439	0.084983373	0.081566921	0.08584287	0.08297401	0.083505096	0.090915883	0.096378556	0.095872936	0.096365232	0.097446348	0.101114712	0.093195336	0.101208162	0.099577315	0.096894696	0.097649674	0.096978682
421	0.081507017	0.081497927	0.082138218	0.081672474	0.081916432	0.081453832	0.0817975	0.083728786	0.086626546	0.082087593	0.081191852	0.082262499	0.084181774	0.087562711	0.090861089	0.083733293	0.083355207	0.08486836	0.081689056	0.083381105	0.088599392	0.092275798	0.09357178	0.083502672	0.083904746	0.084235902	0.097148482	0.099387443	0.098629707	0.102958859	0.092986142	0.099901361	0.08691257	0.083433004	0.087801945	0.084839879	0.085403848	0.092953524	0.098623797	0.098108508	0.098607775	0.099700783	0.103412757	0.095372248	0.103531197	0.101864525	0.099155767	0.099920179	0.099234666
422	0.082452924	0.082660903	0.08347144	0.082756731	0.082921249	0.082528874	0.083130617	0.084074356	0.086431133	0.083764908	0.082918119	0.084076704	0.086084043	0.089580498	0.092974574	0.085618322	0.085223117	0.086819375	0.083511152	0.085298021	0.090680839	0.094421437	0.095743219	0.085430779	0.085854953	0.086191415	0.09938232	0.101658745	0.100889989	0.105284567	0.095190977	0.102192891	0.088918004	0.085391218	0.089829296	0.086798363	0.087385675	0.095043401	0.100891659	0.10036787	0.100872669	0.101978805	0.105738429	0.097575078	0.105884639	0.104178335	0.101440652	0.10221556	0.101514189
423	0.083756619	0.084118124	0.085049041	0.084158098	0.084266188	0.083923842	0.084708154	0.084952402	0.086926755	0.085587476	0.084776005	0.085996689	0.088067994	0.091650477	0.095120477	0.087591398	0.087183013	0.088841114	0.085438101	0.087292863	0.092801898	0.09659571	0.097941027	0.087434155	0.087875152	0.088214402	0.101641105	0.103956339	0.103175791	0.107640866	0.097415849	0.104511012	0.090980781	0.087416805	0.091908553	0.088825157	0.08942905	0.097175521	0.103183853	0.102652318	0.103161594	0.104282288	0.108094275	0.09980282	0.108271255	0.1065211	0.103751294	0.104537893	0.103819118
424	0.085312506	0.085783289	0.086799766	0.085783292	0.085850993	0.085544892	0.086458816	0.08620621	0.087909585	0.08751372	0.086727681	0.087992404	0.090111491	0.093760615	0.097294138	0.089628863	0.089209765	0.090915517	0.087440271	0.08934459	0.094955208	0.098795869	0.100163799	0.089492647	0.089947021	0.09028723	0.10392583	0.106282145	0.105488821	0.110030551	0.099661328	0.106858138	0.093087528	0.08949203	0.09402822	0.090902853	0.091518641	0.099343108	0.105502486	0.104963636	0.10547663	0.106613484	0.110483159	0.102055448	0.110694169	0.108895523	0.106090029	0.106889639	0.106151714
425	0.087050661	0.087599335	0.088676627	0.087570595	0.087609318	0.08732992	0.088335583	0.087731718	0.089243941	0.089516578	0.088748591	0.090044499	0.092200494	0.09590363	0.09949323	0.091715694	0.091287358	0.093031306	0.089498616	0.09143992	0.09713666	0.1010209	0.102411461	0.09159357	0.092059109	0.092398899	0.10623816	0.10863857	0.107831306	0.112456818	0.101928742	0.109237096	0.095230094	0.091605831	0.096181395	0.09302061	0.093644983	0.101542395	0.107850082	0.107304094	0.107820265	0.108975042	0.112908315	0.104333866	0.11315693	0.111304701	0.108459614	0.109273673	0.108514656
426	0.088911573	0.089517725	0.090639731	0.089467515	0.089484721	0.089226044	0.090298517	0.089440112	0.09081409	0.09157322	0.090818076	0.09213682	0.09432339	0.098073686	0.10171617	0.093839376	0.093402438	0.095179195	0.091597213	0.093567862	0.099343136	0.103270358	0.10468439	0.093726447	0.094201994	0.094540375	0.108580037	0.111028253	0.110205711	0.114923094	0.104219699	0.111650925	0.097401886	0.093749127	0.098362559	0.095169517	0.09580036	0.103770567	0.110229367	0.109676196	0.110195189	0.111369816	0.115373197	0.106639321	0.115663337	0.113751954	0.110863014	0.111693087	0.110910832
427	0.090862793	0.091512104	0.092667603	0.091445519	0.091446483	0.091204425	0.092326098	0.091282342	0.092555976	0.09367182	0.092925565	0.094261388	0.096474761	0.100268609	0.103963215	0.095993936	0.09554856	0.09735506	0.093728192	0.095723332	0.101574037	0.105545195	0.106984056	0.095886491	0.096371492	0.096707684	0.110954017	0.113454326	0.112615012	0.117433275	0.106536453	0.114103106	0.099600315	0.09591793	0.100569733	0.097345664	0.09798154	0.106027186	0.112643497	0.112082935	0.112604518	0.113801085	0.117881701	0.108973861	0.118217698	0.116241047	0.113303633	0.114151421	0.113343567
428	0.092881987	0.093564477	0.094745728	0.093485064	0.093473507	0.093245292	0.094403772	0.093224281	0.094424948	0.095804711	0.095064292	0.096413269	0.098651494	0.102487597	0.106235343	0.098175871	0.097721886	0.099556724	0.095886711	0.097903456	0.103829733	0.107846935	0.109312403	0.098071045	0.098565382	0.098898742	0.113363006	0.115920256	0.115062512	0.119991643	0.108881572	0.116597457	0.101824307	0.09811016	0.102802277	0.099547023	0.10018698	0.108312748	0.115095929	0.114527627	0.115051662	0.11627244	0.1204381	0.11133992	0.120824753	0.118776111	0.115785204	0.116652555	0.115816504
429	0.094953708	0.095662548	0.096864315	0.095572723	0.095551233	0.095335074	0.096521727	0.09524198	0.096389465	0.097967045	0.09723006	0.09858956	0.100852004	0.10473077	0.108534046	0.100383369	0.09992034	0.101783341	0.098069965	0.10010685	0.106111275	0.110177531	0.111671752	0.100278889	0.100782772	0.101112739	0.115810236	0.118429867	0.117551859	0.122602934	0.111257904	0.119138169	0.104073822	0.100325023	0.105060467	0.101772852	0.102416274	0.110628411	0.117590452	0.117013929	0.11754036	0.118787825	0.123047114	0.11374027	0.123489765	0.121361699	0.118311821	0.119200755	0.118333643
430	0.097068709	0.09779914	0.099017817	0.097700571	0.097670986	0.097465771	0.098674405	0.097320662	0.098429793	0.100156518	0.099420992	0.100789211	0.10307613	0.106999135	0.110861362	0.102616165	0.102143464	0.104035307	0.100277006	0.102333504	0.108420397	0.112539422	0.114064874	0.102510129	0.103024007	0.103350048	0.118299409	0.12098752	0.12008721	0.125272602	0.113668671	0.121730021	0.106349815	0.102562923	0.107345474	0.104023607	0.104670091	0.112976025	0.120131362	0.119546004	0.120074844	0.121351721	0.125714181	0.116178123	0.126218827	0.124003038	0.12088814	0.121800888	0.120899525
431	0.09921548	0.099965203	0.101199134	0.099858672	0.099821945	0.099627341	0.100854692	0.099442197	0.10052189	0.102369895	0.101634364	0.1030105	0.105323194	0.109293379	0.113219128	0.104873427	0.10439021	0.106312562	0.102506209	0.104582906	0.110758582	0.114934866	0.116494374	0.104764388	0.10528898	0.105610614	0.120834046	0.12359737	0.122672524	0.128005826	0.116116954	0.124377567	0.108652878	0.104823825	0.109658141	0.106299305	0.106948708	0.115357189	0.122722762	0.122127821	0.122659159	0.123968405	0.128444462	0.118656526	0.129017712	0.126705094	0.123518602	0.124457589	0.123518486
432	0.101391174	0.102158812	0.103407055	0.102044759	0.102001501	0.101817503	0.103061378	0.101601296	0.102658254	0.104607464	0.103870679	0.105254286	0.107594504	0.111615463	0.115610026	0.107156479	0.106661776	0.10861679	0.104758533	0.106856467	0.113128336	0.117366912	0.118963627	0.107043152	0.107579325	0.107896049	0.123418558	0.126264638	0.125312763	0.130809232	0.118606548	0.127086546	0.110985015	0.107109384	0.112000596	0.10860165	0.109253926	0.117774535	0.125369771	0.124764344	0.125298344	0.126643237	0.131244564	0.121179324	0.131893872	0.129474188	0.126208786	0.127176709	0.126195962
433	0.10359148	0.104376838	0.105639375	0.104255267	0.104205657	0.104032665	0.105292257	0.103790494	0.104828583	0.106868916	0.106129895	0.107520994	0.109891032	0.113967127	0.118036586	0.109466279	0.108958983	0.110949377	0.107034502	0.109155273	0.115531984	0.119838462	0.121475865	0.10934759	0.109896376	0.110207681	0.12605718	0.128994329	0.128012687	0.133689154	0.121141109	0.129862457	0.11334799	0.109420966	0.114374741	0.11093206	0.111587283	0.120230514	0.128077302	0.127460338	0.127997239	0.129381361	0.134120803	0.123750208	0.13485442	0.132316371	0.12896404	0.129963854	0.128937166
434	0.105816055	0.106619478	0.107896703	0.106490189	0.106434201	0.106272824	0.107547934	0.106008125	0.107029997	0.109155733	0.108413599	0.1098124	0.112214878	0.116350982	0.120502094	0.111805023	0.111283908	0.113312788	0.109336002	0.111481507	0.117972672	0.122353216	0.124035163	0.111679948	0.112242511	0.112547836	0.128755273	0.131792875	0.130778378	0.136653966	0.123725138	0.132712408	0.115744532	0.111760938	0.1167834	0.113292995	0.113951284	0.122728495	0.130851638	0.130221892	0.130762022	0.1321894	0.137081551	0.126373824	0.137908851	0.135239575	0.131791244	0.132826279	0.131748798
435	0.108065253	0.108887494	0.110180112	0.108750127	0.108687582	0.108538602	0.109829477	0.108253569	0.109260968	0.111469657	0.110723623	0.112130469	0.114568275	0.118769705	0.123009857	0.114175048	0.113638779	0.115709591	0.111665105	0.113837479	0.120453579	0.124914873	0.126645594	0.114042594	0.114620213	0.114918946	0.131518174	0.134666661	0.133615879	0.139711965	0.12636312	0.135643455	0.118177445	0.114131775	0.119229454	0.115687018	0.116348525	0.125271873	0.133699017	0.133055054	0.13359883	0.135073928	0.140135106	0.129054801	0.141066572	0.138251671	0.13469723	0.135771188	0.134637506
436	0.110339768	0.111181975	0.112490981	0.111036014	0.110966579	0.110830969	0.112138266	0.110526703	0.111520541	0.113812711	0.113062059	0.114477411	0.116953734	0.121226325	0.125563673	0.116579019	0.11602613	0.118142707	0.114024153	0.116225791	0.12297835	0.127527736	0.129311927	0.116438193	0.117032288	0.117323744	0.134352303	0.137623524	0.136532559	0.142873622	0.129060348	0.138664336	0.120649926	0.116536257	0.121716196	0.118117036	0.118781938	0.127864592	0.13662709	0.135967204	0.136515177	0.138043058	0.143291975	0.131798636	0.144339549	0.141362527	0.137690425	0.138807509	0.137611481
437	0.112641701	0.113505178	0.114831668	0.113350029	0.113273306	0.113152159	0.114476657	0.11282947	0.113810411	0.116187525	0.115431553	0.116855886	0.119374129	0.123724132	0.128167548	0.119019997	0.1184489	0.120615392	0.116415942	0.118649395	0.125550857	0.130196312	0.13203915	0.118869755	0.119481867	0.119765281	0.137264359	0.140671641	0.139536109	0.146149894	0.131822325	0.141784178	0.123165461	0.118977483	0.124247188	0.120586282	0.121254759	0.130510847	0.139643835	0.138966043	0.139518906	0.141105259	0.146563158	0.134611062	0.147740322	0.144582467	0.140779625	0.141944573	0.140679273
438	0.114972404	0.11585878	0.117204081	0.115693712	0.115609176	0.115503774	0.116846557	0.115162687	0.116130769	0.11859655	0.117834604	0.119268474	0.121832355	0.126266609	0.130825896	0.121501083	0.120910039	0.123131026	0.118843211	0.121111292	0.12817532	0.132925645	0.134832908	0.121340354	0.121972182	0.1222467	0.140262154	0.143820734	0.14263562	0.149554152	0.134655369	0.145013934	0.12572775	0.121458651	0.126826234	0.123098116	0.123770365	0.133215248	0.142758749	0.142060673	0.142619336	0.14427067	0.149962146	0.137498663	0.151284302	0.147924029	0.143975351	0.145193585	0.143851093
439	0.117334233	0.118245312	0.119610854	0.118069505	0.117976557	0.117888334	0.119250603	0.117528639	0.118483664	0.12104273	0.120274167	0.121718142	0.124331661	0.128857559	0.133543487	0.124025768	0.12341288	0.125693356	0.121309098	0.123614829	0.130856316	0.135721185	0.137699308	0.123853411	0.124506812	0.124771477	0.143354185	0.147081431	0.145841015	0.153101126	0.137566313	0.148365609	0.128340849	0.123983292	0.129457495	0.125656252	0.126332477	0.135982813	0.145982208	0.145261034	0.145826653	0.147550392	0.153503812	0.140468584	0.154988503	0.151401001	0.147289118	0.148566833	0.147138113
440	0.119729446	0.120667316	0.122054721	0.120479818	0.120377745	0.120308344	0.121691526	0.119929337	0.120870675	0.123529299	0.122753497	0.124208203	0.126875765	0.131501509	0.136326242	0.126598078	0.125961236	0.128306777	0.123817131	0.126163857	0.133599445	0.138589837	0.140646223	0.126412874	0.127089928	0.127343653	0.14655199	0.1504687	0.149166124	0.156812739	0.140564136	0.151856414	0.131009608	0.126555516	0.132145977	0.12826505	0.128945477	0.138819789	0.149328876	0.148580979	0.149155229	0.150960319	0.157210603	0.143530259	0.158878584	0.155033679	0.150737301	0.152081953	0.150556189
441	0.122160506	0.123127496	0.124538545	0.122927237	0.122815229	0.122766488	0.124172188	0.122367106	0.123293793	0.126059553	0.125275907	0.126742007	0.129468406	0.134202973	0.139180034	0.129222057	0.128558944	0.130975689	0.126370877	0.128762243	0.136410275	0.141538433	0.143681431	0.129022708	0.129725706	0.129967275	0.149866912	0.153997213	0.152624512	0.160710366	0.143657694	0.155503192	0.133738867	0.129179439	0.13489667	0.130928874	0.131613744	0.141732374	0.152813113	0.152034097	0.152619144	0.154515999	0.161104372	0.14669299	0.162979535	0.158841869	0.154335932	0.155756202	0.154120845
442	0.12462922	0.125627907	0.127064547	0.125413706	0.125290851	0.125264775	0.126694812	0.124843427	0.125754065	0.128636139	0.127844071	0.129322279	0.132112593	0.136965508	0.142109327	0.131900929	0.13120908	0.133703573	0.128973217	0.131413095	0.139293087	0.144572066	0.146810627	0.131686091	0.132417476	0.132645584	0.15330683	0.157676778	0.156225351	0.164807531	0.14685335	0.159317001	0.136532408	0.131858354	0.137713457	0.13365118	0.134340747	0.144725249	0.156444503	0.155629574	0.156227804	0.158227669	0.165198772	0.14996342	0.167306952	0.162838246	0.158095628	0.159600894	0.157842387
443	0.127139019	0.128172272	0.12963664	0.127942799	0.127808068	0.127806924	0.129263305	0.12736175	0.128254651	0.131263512	0.130462444	0.131953517	0.134813413	0.139795415	0.145122629	0.134640254	0.133916885	0.136496537	0.131628968	0.134121688	0.142255854	0.147700844	0.150045531	0.134408442	0.135170991	0.135384132	0.156889793	0.161531657	0.159990832	0.169141638	0.150164716	0.163326198	0.13939704	0.134597911	0.140603391	0.136438016	0.137132567	0.147807453	0.160246905	0.159389666	0.160004574	0.162121528	0.169532664	0.15335593	0.171905107	0.16705708	0.162043147	0.163645115	0.161746671
444	0.129692973	0.130763944	0.132258358	0.130517728	0.130369977	0.130396277	0.131881197	0.129925093	0.130798254	0.133945722	0.133135077	0.134639818	0.137575477	0.142698366	0.148227523	0.137445059	0.136687106	0.13936009	0.13434251	0.136892801	0.145305705	0.150933726	0.153396486	0.137194673	0.137991449	0.138187946	0.160631516	0.165582788	0.163940153	0.173744579	0.153603747	0.167555161	0.142338884	0.137403223	0.143572802	0.139294839	0.139994685	0.150987029	0.164240897	0.163333623	0.163969609	0.166220099	0.174139078	0.156883129	0.17681165	0.17152766	0.166201535	0.16791386	0.16585598
445	0.1322943	0.133406448	0.134933429	0.133141865	0.132979826	0.133036344	0.13455221	0.132536614	0.133387685	0.136687063	0.13586627	0.137385534	0.140403719	0.14568049	0.151432333	0.140320732	0.139524821	0.142300162	0.137118502	0.13973155	0.148450421	0.154280638	0.156875045	0.14005004	0.140884432	0.141062418	0.164550051	0.169854744	0.168095712	0.178655082	0.157183909	0.17203276	0.145364563	0.140279776	0.14662856	0.142227523	0.142933011	0.154272829	0.16845071	0.167483919	0.168146635	0.170550144	0.179058637	0.160559287	0.18207259	0.176285282	0.170597924	0.172436733	0.170196522
446	0.134947179	0.136104335	0.137666646	0.135819573	0.135641828	0.135731678	0.13728113	0.135200578	0.13602689	0.139493028	0.138661501	0.140196211	0.143304478	0.148749817	0.154748263	0.143274245	0.14243657	0.145324483	0.139962907	0.142644523	0.151700379	0.157755127	0.160497177	0.142981331	0.14385718	0.144014525	0.168671237	0.17438353	0.172490114	0.183931736	0.160924046	0.176801713	0.148482808	0.143234671	0.149779746	0.145243721	0.145955252	0.157676819	0.172911951	0.17187329	0.172570493	0.175151321	0.184353364	0.164404462	0.187757956	0.181382993	0.175272243	0.177257555	0.174806823
447	0.13765567	0.138862071	0.140462744	0.138555114	0.138360081	0.138486735	0.14007268	0.137921051	0.138719539	0.14236912	0.141526272	0.143077436	0.146284191	0.151914595	0.158187021	0.146312675	0.145428983	0.148440949	0.142881742	0.145638412	0.155066344	0.16137149	0.164279898	0.145995445	0.14691707	0.147051376	0.173023486	0.179209741	0.177159876	0.189643328	0.164844393	0.181910609	0.15170259	0.146275142	0.153035721	0.148351245	0.149069294	0.161211533	0.177664987	0.176538438	0.177280676	0.180069103	0.190097431	0.168440339	0.193950439	0.186882453	0.180269552	0.182426137	0.179730328
448	0.140424111	0.14168442	0.143326772	0.141353037	0.141138967	0.141306273	0.1429319	0.140702412	0.141469615	0.145321207	0.144466439	0.14603516	0.149349725	0.155183659	0.161761221	0.149443586	0.148509134	0.151658008	0.145881421	0.14872036	0.158559891	0.165145172	0.168241634	0.149099751	0.150071989	0.150180567	0.177637753	0.184377766	0.182144889	0.19586539	0.168966908	0.187412656	0.155033535	0.149408922	0.156406536	0.151558458	0.152283578	0.164890483	0.18275397	0.181519457	0.182320375	0.185353287	0.196372354	0.17269047	0.200740915	0.192851316	0.185639159	0.18799703	0.185014566
449	0.14325741	0.144576822	0.14626453	0.144218516	0.143983446	0.144195717	0.145864575	0.143549587	0.144281547	0.148356129	0.147488844	0.14907637	0.152509249	0.158567777	0.165486775	0.152675998	0.151685428	0.154985848	0.148969495	0.151898876	0.162195418	0.169096012	0.172406471	0.152303046	0.153331405	0.153411204	0.182556693	0.189951184	0.187501717	0.202712601	0.173320679	0.193385024	0.158487417	0.15264528	0.159904549	0.15487544	0.155608318	0.1687308	0.188242688	0.186873303	0.18775197	0.191077048	0.203305231	0.177186421	0.208268373	0.199390844	0.191451733	0.194049265	0.190727574
450	0.146160692	0.14754497	0.149282096	0.14715696	0.146898703	0.14716074	0.14887677	0.146467724	0.147159956	0.151481089	0.150600685	0.152208426	0.155771411	0.162078433	0.169380848	0.156019464	0.154966751	0.158435298	0.152153932	0.155182965	0.165988378	0.17324555	0.176800713	0.155614648	0.156705366	0.156752945	0.18782777	0.196001736	0.19329396	0.210317205	0.177937579	0.199915126	0.162076807	0.155994047	0.163542977	0.158312907	0.159054381	0.172751007	0.194203366	0.192664069	0.193646082	0.197323785	0.211044234	0.181962969	0.216693477	0.20661713	0.19778694	0.200672306	0.196946016
451	0.149139833	0.15059543	0.15238652	0.150174591	0.149890686	0.150207887	0.151975512	0.149462708	0.150110089	0.154704548	0.153810429	0.155440035	0.159146562	0.165729694	0.173465172	0.159485439	0.158363718	0.162019482	0.155444177	0.158583417	0.169958062	0.177621529	0.181458815	0.159045742	0.160205993	0.160217427	0.193516258	0.202631562	0.199611396	0.218877286	0.182859728	0.207128558	0.165817158	0.159467073	0.167338153	0.16188384	0.162634979	0.176974703	0.200739728	0.198982409	0.200104123	0.204215169	0.219816905	0.187066736	0.226258145	0.214701793	0.204757943	0.207994491	0.203778666
452	0.152201211	0.15373536	0.155585506	0.153278179	0.152965858	0.153344282	0.155168483	0.15254092	0.153137621	0.15803583	0.157127407	0.158780828	0.162646259	0.169537535	0.177765047	0.163086711	0.16188815	0.165753169	0.158850692	0.162112271	0.174126663	0.182256693	0.18642198	0.162608831	0.163846884	0.163817696	0.199703436	0.209971612	0.206568325	0.228658074	0.188137721	0.215187301	0.169726052	0.163077634	0.171308739	0.165602847	0.166365028	0.181429531	0.207985951	0.205944029	0.207257276	0.211910805	0.229935369	0.192554561	0.237287267	0.223871865	0.21250912	0.216180997	0.211364178
453	0.155351833	0.156972655	0.158887584	0.156475177	0.156131322	0.156577778	0.158464184	0.155709359	0.15624875	0.161485357	0.160562058	0.16224163	0.166283625	0.173520445	0.182310617	0.166837798	0.165553426	0.169653282	0.162385247	0.165783186	0.178520261	0.18719066	0.191740834	0.166318121	0.167643561	0.167568626	0.206493724	0.218195519	0.214315194	0.240027762	0.193833891	0.224307317	0.173823902	0.166840863	0.175476503	0.16948666	0.170261673	0.186148704	0.216121789	0.213701703	0.215281301	0.220627773	0.241844138	0.198497786	0.250233021	0.234438458	0.221230637	0.225451459	0.219884969
454	0.158599489	0.160316139	0.162302331	0.159773898	0.159394985	0.159917144	0.161872153	0.158975788	0.159450316	0.165064959	0.164126233	0.165834808	0.170073834	0.177700305	0.187138759	0.170755473	0.169374956	0.173739589	0.166061301	0.169611937	0.18317024	0.192472764	0.19747951	0.170190049	0.171614075	0.171487492	0.21402619	0.22754259	0.223057735	0.253518497	0.200027273	0.234787779	0.178134938	0.17077433	0.179867432	0.17355482	0.174345026	0.191173282	0.225398061	0.22246525	0.224421482	0.230673777	0.256202533	0.204988998	0.265750112	0.246845235	0.231182358	0.236109106	0.229589964
455	0.161952817	0.163775648	0.165840465	0.163183585	0.162765621	0.163372145	0.165403062	0.162348785	0.162749839	0.168788028	0.167833358	0.16957446	0.174034408	0.182102977	0.192294563	0.174859071	0.17337044	0.17803515	0.169894206	0.1736167	0.188114322	0.198164411	0.203719234	0.174243594	0.175779378	0.175594325	0.222485756	0.238341508	0.233076442	0.269892368	0.206817859	0.24704147	0.182687896	0.174898394	0.184512532	0.177830113	0.178638653	0.196554077	0.236163839	0.232522267	0.235019274	0.242482956	0.273975382	0.21214827	0.284776624	0.261720322	0.242718182	0.248570735	0.240817568
456	0.165421626	0.167362416	0.169514299	0.166714772	0.166253206	0.166953918	0.169069166	0.165838051	0.166155769	0.172670176	0.171699091	0.173477181	0.178186317	0.1867604	0.197836215	0.17917167	0.177560919	0.182567926	0.173902031	0.177819161	0.193400092	0.204346659	0.21056958	0.17850145	0.180164713	0.179913209	0.232137135	0.251080592	0.244784471	0.290329152	0.214340084	0.261685253	0.18751843	0.17923751	0.189450585	0.18234015	0.183171304	0.202357774	0.248947001	0.244299977	0.247591198	0.256720156	0.296681354	0.22014237	0.308762827	0.280026194	0.256359342	0.263456057	0.254064754
457	0.169016835	0.171089023	0.173337696	0.170379224	0.169868857	0.170674915	0.172884247	0.16945434	0.169677424	0.176729215	0.175741304	0.177562091	0.182554139	0.191711171	0.203837059	0.183720209	0.181970852	0.187371081	0.178105584	0.18224462	0.199086201	0.211123868	0.218174494	0.182990165	0.184799818	0.184472468	0.243346975	0.266457161	0.258767544	0.316550171	0.222769882	0.279606025	0.19266982	0.183820412	0.194729046	0.187117663	0.187977299	0.208669889	0.264516047	0.25841055	0.262889517	0.274358457	0.326539913	0.229196184	0.339811636	0.303162409	0.27284767	0.281651517	0.270036093
458	0.17275085	0.174969856	0.177326613	0.174190363	0.173625225	0.17454935	0.176864162	0.173209807	0.173325269	0.180985992	0.179980924	0.181851852	0.187167609	0.19700373	0.210393693	0.188537108	0.186629531	0.19248532	0.18252949	0.186923512	0.205247932	0.218636695	0.226732178	0.187741759	0.189720894	0.189306497	0.256647769	0.285509915	0.275893276	0.351098991	0.232349039	0.302137385	0.19819668	0.188681947	0.200408371	0.192202792	0.193099092	0.215605252	0.284045255	0.275774562	0.282064332	0.296878903	0.366770616	0.239627761	0.380974241	0.333212848	0.293294123	0.30448291	0.289780898
459	0.176637753	0.179021357	0.181499417	0.178163484	0.177536689	0.178593436	0.181027137	0.177118166	0.177111034	0.18546493	0.184442466	0.186373388	0.192062863	0.20269926	0.217634111	0.193661501	0.191572131	0.197960823	0.187202945	0.191892554	0.211982484	0.227075599	0.236516289	0.192794987	0.194972174	0.194457222	0.272808312	0.309754968	0.297427451	0.397436352	0.243412644	0.331248955	0.204168327	0.193864535	0.20656606	0.197644987	0.198589473	0.223318844	0.309308097	0.297763673	0.306854015	0.326475761	0.42152246	0.251886541	0.436210468	0.373105803	0.31935354	0.33390025	0.314851673
460	0.180693641	0.183262459	0.185877436	0.182316154	0.181619713	0.182825798	0.185394308	0.181194985	0.181047949	0.190194946	0.18915496	0.19115911	0.197284499	0.208876414	0.225730898	0.199141297	0.196841473	0.203860445	0.192160981	0.197196685	0.219417564	0.236702569	0.247909745	0.198197433	0.200608538	0.199976536	0.29294066	0.341359176	0.325194737	0.45961265	0.256435826	0.369791847	0.210674261	0.199420596	0.213303233	0.203506147	0.204515201	0.232023206	0.342962243	0.326416168	0.339867441	0.366302277	0.494994879	0.266613456	0.509561036	0.426605344	0.353489326	0.372722446	0.347544499
461	0.184937029	0.187715123	0.190485628	0.18666868	0.185893273	0.187267974	0.189990375	0.185458026	0.185151	0.195210634	0.194153135	0.196248519	0.202888353	0.215637831	0.234919772	0.20503591	0.202490348	0.210264017	0.197446131	0.202891634	0.227723321	0.247881692	0.261452006	0.204008315	0.206699015	0.205929575	0.318635225	0.383263061	0.361734081	0.540669424	0.272105547	0.421658037	0.217831652	0.20541583	0.220753707	0.209864862	0.210961939	0.242012834	0.388846823	0.36468959	0.384884695	0.420554013	0.58849409	0.28472308	0.602272005	0.497624453	0.399273569	0.424811177	0.391177613
462	0.189389345	0.192404986	0.195353441	0.1912447	0.190379377	0.191945028	0.19484442	0.189927656	0.189437245	0.200553787	0.199478945	0.201690348	0.208945259	0.223119191	0.245525829	0.211419926	0.208584634	0.217274179	0.203110613	0.2090474	0.237129044	0.261122174	0.27790424	0.210302275	0.213331532	0.212399182	0.352101481	0.439032558	0.410319172	0.638585021	0.29143135	0.491409706	0.225795563	0.21193367	0.22909648	0.216822186	0.218041028	0.253697607	0.451981638	0.416606136	0.446884953	0.493820459	0.694491585	0.307510414	0.706867588	0.587815176	0.461478831	0.494745352	0.450208201
463	0.194075553	0.197362207	0.200515911	0.19607192	0.195103725	0.196886335	0.199990976	0.194627349	0.19392619	0.206275438	0.20518363	0.207545482	0.215546269	0.231501998	0.258000771	0.21838808	0.215207513	0.225024288	0.209219317	0.215753034	0.247946772	0.277137929	0.298334657	0.217174618	0.220619402	0.219492119	0.396217119	0.511873407	0.474473826	0.740297475	0.315912999	0.582146914	0.234772636	0.219081451	0.238572587	0.224509514	0.22589874	0.267645369	0.537263664	0.486788851	0.530846705	0.588363617	0.79177883	0.33677004	0.802260681	0.691237987	0.54505467	0.585756258	0.529430953
464	0.19902495	0.202622544	0.206015105	0.201183075	0.200096561	0.202126573	0.205471409	0.199584309	0.198640255	0.212438585	0.211330489	0.213890999	0.222809957	0.241031602	0.272973972	0.226061954	0.222465197	0.233688815	0.215853892	0.223123241	0.260604175	0.296924193	0.324212723	0.224748572	0.228710084	0.227347738	0.454194195	0.601762762	0.556155031	0.821533747	0.347775602	0.689612308	0.245038221	0.226998896	0.24950629	0.233099095	0.234728578	0.28462568	0.644640644	0.578098375	0.637164741	0.697692965	0.854107576	0.374863875	0.862494774	0.788837854	0.650711855	0.693797402	0.630320093
465	0.204272192	0.208228776	0.211902027	0.206617177	0.20539377	0.207707034	0.211335763	0.204830268	0.203605367	0.219121854	0.217998685	0.220825821	0.230892643	0.252042101	0.291317283	0.234598768	0.230494523	0.243496153	0.223118421	0.231307453	0.275688378	0.321839523	0.357465818	0.233185341	0.237796667	0.236150063	0.528224963	0.70025695	0.651598042	0.86205867	0.390234116	0.794262707	0.256954767	0.235869569	0.262327669	0.2428173	0.244786529	0.305626421	0.759651071	0.685481908	0.752352826	0.799799959	0.87105651	0.4245544	0.877706902	0.85448354	0.765313502	0.799241807	0.742555834
466	0.20985859	0.214232489	0.218239014	0.212421085	0.211038263	0.213677254	0.217645083	0.210402444	0.208851655	0.226424213	0.225288288	0.228478347	0.24000209	0.264988392	0.314212083	0.244201881	0.239472338	0.254741969	0.231147022	0.240501647	0.293997849	0.353648737	0.400375461	0.242697353	0.248131584	0.246143793	0.616306267	0.787511179	0.746358055	0.861567792	0.447561022	0.865880086	0.270984351	0.245935187	0.277586968	0.253959148	0.256406964	0.331780384	0.850566995	0.788546442	0.845333513	0.865212264	0.852737103	0.488208834	0.858426946	0.875248949	0.857456954	0.871225002	0.83815835
467	0.215833821	0.220696445	0.225102882	0.218651588	0.217081819	0.220097186	0.22447453	0.216344792	0.214414364	0.23447118	0.233327223	0.237017117	0.250416192	0.280486344	0.343192736	0.255133115	0.249627074	0.267801531	0.240114371	0.250963991	0.316596023	0.3944308	0.455080156	0.253566023	0.260042934	0.257655788	0.707839528	0.841285566	0.817604999	0.833525572	0.524257218	0.888133266	0.287687778	0.257513257	0.295949243	0.266902804	0.270016913	0.364133239	0.89074113	0.857447898	0.888439426	0.881522902	0.814097642	0.565783856	0.819561882	0.859365241	0.899041756	0.893019314	0.88784054
468	0.222258125	0.22769763	0.232588912	0.225378069	0.223587446	0.227039984	0.231917372	0.222709572	0.220334975	0.243422848	0.242280593	0.2466653	0.26250736	0.299356873	0.380096253	0.26772676	0.261252773	0.283140137	0.250249922	0.263035073	0.344841574	0.446152552	0.522331201	0.266164878	0.273954014	0.271122851	0.78344946	0.853894963	0.849280714	0.790361782	0.621649487	0.870458283	0.307707443	0.271017958	0.318162868	0.282122907	0.286146932	0.403251896	0.882728638	0.877349218	0.882621543	0.860266248	0.764827201	0.651469855	0.770624868	0.821884506	0.891632955	0.874502881	0.888018796
469	0.229205159	0.235331204	0.240816024	0.232685969	0.230632449	0.234595611	0.240090247	0.229559324	0.226662607	0.253484646	0.252363388	0.257720342	0.276773543	0.322664391	0.426792926	0.282407908	0.274727898	0.301327552	0.261857284	0.277165194	0.380346199	0.509642127	0.599345494	0.2809902	0.290410437	0.287127756	0.825583005	0.834482453	0.843498826	0.739350422	0.7304188	0.83047514	0.331749497	0.286987287	0.345018773	0.300207609	0.305444862	0.448826696	0.846113736	0.858230845	0.847146458	0.818288959	0.710168861	0.731499874	0.71676425	0.773145931	0.855265032	0.833773054	0.856349126
470	0.23676586	0.24371595	0.249934076	0.240681526	0.238312615	0.242875772	0.249140534	0.236969471	0.23345586	0.26492314	0.26385877	0.270581602	0.29387786	0.35173081	0.484502035	0.299721604	0.290544517	0.32306718	0.275341945	0.293954126	0.424771871	0.582802633	0.677613938	0.298703778	0.310122507	0.306447538	0.831037546	0.796104188	0.812925157	0.684496644	0.825105006	0.779535533	0.360584393	0.306124395	0.377322199	0.32188962	0.328704919	0.499424385	0.795669447	0.817309257	0.797242712	0.765973321	0.652988403	0.788571397	0.660786087	0.718792497	0.805168352	0.782265163	0.808934891
471	0.245053613	0.25300169	0.260134139	0.249498217	0.24674784	0.252020532	0.25925663	0.245031634	0.240785113	0.278088992	0.277144127	0.285788138	0.314693959	0.388072255	0.552455563	0.320375856	0.309351219	0.349237657	0.291249966	0.314206153	0.479300677	0.658615216	0.743570016	0.320188604	0.334022274	0.330111992	0.809122569	0.747561413	0.768573027	0.62800813	0.877543805	0.723355915	0.395043597	0.32935751	0.415844746	0.348090267	0.356908344	0.552377159	0.738583934	0.765520821	0.740392268	0.708613755	0.594828984	0.812713779	0.604180913	0.661902088	0.748630601	0.725667002	0.753987614
472	0.254211417	0.263379752	0.271663241	0.259305812	0.256089989	0.262207546	0.270682605	0.253857996	0.248735528	0.293449948	0.292728681	0.304069737	0.340347398	0.433151291	0.625982369	0.345294026	0.332009073	0.380920779	0.310321302	0.338998791	0.543553879	0.725092512	0.784637256	0.346612105	0.363320835	0.359458966	0.770759615	0.693793389	0.716945909	0.571075898	0.881710532	0.664952779	0.435933519	0.357912644	0.461149454	0.379952204	0.39123946	0.60377957	0.678514404	0.708417511	0.680383239	0.649020382	0.536530022	0.806522362	0.547725105	0.604111752	0.689342258	0.666968212	0.695642324
473	0.264421902	0.275097584	0.28484478	0.270323059	0.266533921	0.273664864	0.283738672	0.263587082	0.257410979	0.311635362	0.311305919	0.326410062	0.372220278	0.487760274	0.695349098	0.375655361	0.359648261	0.419356372	0.333557306	0.369745985	0.613933386	0.769845394	0.796492476	0.379468581	0.399522105	0.396137297	0.723268184	0.637566619	0.66168698	0.514352693	0.85278842	0.605880741	0.483751771	0.393364136	0.51315164	0.418798878	0.432994984	0.64885655	0.617360008	0.648961647	0.619190865	0.588664465	0.478594405	0.779139105	0.491825981	0.54628562	0.629197631	0.6076966	0.636066576
474	0.275920719	0.288478024	0.300104556	0.28283449	0.278332205	0.286687788	0.298847847	0.27439106	0.266938957	0.333489056	0.33381914	0.354107143	0.411848335	0.550901544	0.748163095	0.41287366	0.393689738	0.465724632	0.362287765	0.408196627	0.682383958	0.786877222	0.783504893	0.420524463	0.444295778	0.44194167	0.670929203	0.580411844	0.604834658	0.458235095	0.806702592	0.546937757	0.538114822	0.437570504	0.570376929	0.465910637	0.483255028	0.683011658	0.556100148	0.588731279	0.557836353	0.528346302	0.421419698	0.738924625	0.436736069	0.488907727	0.569134417	0.548628193	0.576355244
475	0.289017185	0.303948095	0.318007358	0.29721585	0.291817721	0.301664195	0.316574506	0.286486658	0.277477911	0.360130829	0.361543768	0.388805257	0.46057455	0.618259728	0.775675097	0.45840888	0.435756453	0.520565807	0.398209368	0.456233325	0.737731963	0.778784272	0.753327069	0.47149747	0.498998428	0.498236264	0.616178942	0.523173471	0.547506407	0.403059484	0.752134792	0.488560817	0.596834421	0.492282387	0.629047922	0.521904872	0.542082035	0.703266539	0.495294455	0.528581544	0.496902862	0.468568921	0.365490876	0.69132841	0.382728213	0.432314675	0.50963979	0.490181358	0.517078209
476	0.304114937	0.322065594	0.339285124	0.313958385	0.307426001	0.319098232	0.337656594	0.300145077	0.289223863	0.392966647	0.396117974	0.432373999	0.518828234	0.68171894	0.776897835	0.513234493	0.487298259	0.582775219	0.443258011	0.515214444	0.770618978	0.752339945	0.712454888	0.533224708	0.563621489	0.564758642	0.560441354	0.466379181	0.490371288	0.349276706	0.693576614	0.431070302	0.655208324	0.558108916	0.68295039	0.585637966	0.607287508	0.708959899	0.43537338	0.469065414	0.436836235	0.409781438	0.311550501	0.639702633	0.330259117	0.376884992	0.451033094	0.432656821	0.458598058
477	0.32175354	0.343568277	0.364879083	0.333715406	0.325739454	0.339655393	0.363057235	0.315712798	0.30242469	0.433619283	0.439493136	0.486457799	0.58470149	0.731054573	0.757298477	0.576589198	0.548588531	0.647994825	0.499109837	0.584346653	0.778380109	0.714163923	0.665216172	0.603825868	0.634736523	0.637422102	0.50452006	0.410441873	0.433884868	0.297633145	0.633304155	0.374847355	0.706024848	0.632241914	0.724638293	0.652443411	0.67280331	0.701581446	0.376831753	0.410643287	0.378140542	0.352573591	0.260765706	0.585980468	0.280147248	0.323222604	0.393640857	0.376412052	0.401249681
478	0.342638037	0.369392577	0.395914692	0.357326951	0.347516282	0.36418372	0.393953134	0.333624908	0.317389855	0.483545987	0.493495749	0.551374056	0.652623716	0.75845037	0.723706219	0.644388119	0.617113341	0.708127583	0.565954206	0.658534956	0.764608466	0.668950039	0.614360535	0.676768135	0.704015605	0.707034553	0.448957747	0.355860572	0.378512789	0.249272043	0.572549839	0.320507561	0.741750147	0.706317782	0.748304363	0.713636168	0.729037513	0.68361661	0.320414262	0.353882219	0.321564971	0.297847019	0.214710518	0.531344779	0.233638092	0.272296285	0.33797563	0.322034191	0.345521995
479	0.367693931	0.400687946	0.433598169	0.385855156	0.373740462	0.393740322	0.4316534	0.354433315	0.334512375	0.543052076	0.558590297	0.623878458	0.712864807	0.76234575	0.681403871	0.707829663	0.685482738	0.753039643	0.640043057	0.72666997	0.735657117	0.619568832	0.561535745	0.740160374	0.759046067	0.760759097	0.394234649	0.303407823	0.324919922	0.205733293	0.511979911	0.269083302	0.757782191	0.76653954	0.752345812	0.758516467	0.766059495	0.657630492	0.267301615	0.299646196	0.268290452	0.246967486	0.175106935	0.476531626	0.192326569	0.225533121	0.284929395	0.27052457	0.292249464
480	0.398065249	0.438699462	0.478881643	0.420523019	0.405599734	0.429513493	0.477269905	0.378811017	0.354278504	0.609737101	0.63176849	0.695432332	0.754903054	0.746349764	0.633865524	0.755761268	0.742342056	0.77539176	0.711979108	0.775287419	0.69692932	0.567874662	0.507816793	0.781570836	0.789363951	0.788631397	0.340954214	0.25423386	0.274106207	0.168591551	0.45206679	0.222043911	0.754006367	0.800466283	0.738943209	0.779683302	0.778682985	0.625744897	0.219109473	0.249195501	0.219931567	0.201661011	0.143193089	0.422112357	0.157694405	0.18460125	0.23584867	0.223327943	0.242703995
481	0.43507394	0.48445994	0.531757633	0.462535216	0.444395033	0.47260562	0.530981294	0.407556543	0.377289619	0.676574721	0.703975747	0.752839404	0.772502302	0.716211078	0.583217564	0.77988072	0.776874354	0.77429936	0.767906424	0.795771783	0.65208828	0.514996306	0.453910142	0.794910695	0.792349441	0.789089275	0.29000919	0.209879457	0.227489679	0.138855088	0.393275378	0.181122143	0.733999743	0.804515696	0.712293344	0.776769189	0.768670429	0.589541306	0.177656364	0.204174535	0.178309681	0.163621912	0.119099452	0.368659956	0.130474698	0.150905789	0.192465264	0.182174927	0.198567818
482	0.47995121	0.538113611	0.590277673	0.512587473	0.491183665	0.523494228	0.590928682	0.441519807	0.404248313	0.732687591	0.761571025	0.784666409	0.766226726	0.676783822	0.530852969	0.778953443	0.784803367	0.754027282	0.796715593	0.788751483	0.603526907	0.461711435	0.400422864	0.782727574	0.772750388	0.767562437	0.242658182	0.171942252	0.186702014	0.116509215	0.336271132	0.147717843	0.702238146	0.784026219	0.676392383	0.754634936	0.741601366	0.550200325	0.144294084	0.166209729	0.14478741	0.133795698	0.101899561	0.316931743	0.110347046	0.124954638	0.156385207	0.148495023	0.161486563
483	0.533173575	0.597686581	0.649396585	0.569863827	0.545970099	0.580978565	0.651864945	0.481414796	0.435914707	0.767584901	0.792782398	0.787904803	0.74157857	0.631384893	0.477674229	0.758067171	0.769787363	0.720546648	0.796621135	0.761552548	0.552745396	0.408640794	0.348037506	0.752534641	0.738050715	0.731564697	0.20046533	0.141481058	0.153098648	0.100545369	0.282111188	0.122208382	0.66255976	0.747636769	0.634306881	0.719554853	0.703313993	0.50861201	0.119199362	0.136235215	0.119556404	0.11185462	0.09010281	0.26801461	0.096140997	0.10608943	0.128351546	0.122716455	0.13235829
484	0.593305297	0.658034265	0.701335824	0.630830854	0.606494173	0.641053557	0.7054686	0.527417318	0.472951384	0.776812549	0.794665128	0.767567091	0.704536108	0.582234275	0.424390172	0.723693931	0.738638525	0.678655315	0.773661918	0.721687707	0.500758714	0.356459266	0.297667938	0.711132155	0.694133341	0.68676244	0.164900574	0.118536352	0.127163691	0.089581581	0.232309543	0.103845166	0.61776935	0.701915614	0.588241797	0.676369509	0.658046705	0.465521382	0.101386056	0.114047585	0.101639038	0.096521785	0.082288282	0.22332462	0.08648019	0.092983284	0.107910924	0.104130126	0.11091158
485	0.655343694	0.710687607	0.737802039	0.688253488	0.666793719	0.696224303	0.74282266	0.578399418	0.515576849	0.763449271	0.773170098	0.731604365	0.659605675	0.530782084	0.371697611	0.680924406	0.697387585	0.631560243	0.736023942	0.674286652	0.448283494	0.306054816	0.250565983	0.662990785	0.644695386	0.636668661	0.136746179	0.102122847	0.10825453	0.082312192	0.188708233	0.091176494	0.569771305	0.650777948	0.539703628	0.62822882	0.60852464	0.421594094	0.089241673	0.09842248	0.089420873	0.08618902	0.077337572	0.18441829	0.08015234	0.084191936	0.093689965	0.091295282	0.095877939
486	0.710575222	0.746742749	0.753703611	0.732825952	0.717788088	0.737518198	0.758597845	0.631144447	0.563006522	0.733844698	0.736438694	0.686193629	0.609797747	0.478072454	0.320458375	0.633102586	0.650045564	0.581388769	0.689681344	0.622502962	0.395969326	0.258618722	0.208239875	0.610910316	0.592084473	0.583527095	0.115769291	0.090842095	0.095073675	0.077709321	0.152897881	0.082736005	0.519891678	0.596634938	0.489770265	0.577204282	0.556556908	0.377488625	0.081235966	0.087827368	0.081364648	0.079465106	0.074426199	0.152498405	0.076225145	0.078521776	0.084147202	0.082737705	0.085727185
487	0.74903441	0.761049918	0.749232648	0.757054328	0.750436592	0.758377039	0.753273963	0.679820204	0.612592557	0.693866135	0.690652377	0.635131689	0.557034879	0.424927449	0.271831214	0.582301715	0.599070115	0.529489823	0.638199469	0.568236005	0.34455944	0.215636278	0.17215319	0.556605958	0.537748309	0.528734224	0.100860066	0.083354485	0.086200041	0.075028484	0.125445578	0.077340917	0.469040092	0.540944696	0.43923336	0.524602956	0.503304873	0.333916999	0.076182375	0.08088968	0.076276655	0.075314741	0.072976322	0.127867861	0.074029288	0.075093699	0.077978932	0.077261273	0.079116836
488	0.764422507	0.753952191	0.728074812	0.758676699	0.760145714	0.757432758	0.730991375	0.717342351	0.659551997	0.647542455	0.639639278	0.580831641	0.502656015	0.37216547	0.227261839	0.529903717	0.546091747	0.476797957	0.583841672	0.51275642	0.295023394	0.178605374	0.1432183	0.501236435	0.482676705	0.473265796	0.090654511	0.078596882	0.080448026	0.073721252	0.105693693	0.074109819	0.417944136	0.484689451	0.388795246	0.471334396	0.449615654	0.291702753	0.073212027	0.076555253	0.07328272	0.072983408	0.072566074	0.109895827	0.073071792	0.073261679	0.074204705	0.073973673	0.075024169
489	0.757176592	0.730034106	0.695039949	0.741012584	0.748658171	0.73832099	0.696877573	0.738010443	0.697459359	0.597336922	0.585603496	0.524768216	0.447611444	0.320759721	0.188316028	0.476779246	0.492127401	0.423991974	0.527969091	0.456902665	0.24866055	0.148539248	0.12134705	0.445595749	0.427585797	0.417866214	0.083911843	0.075804452	0.076943487	0.073405885	0.092105862	0.072430432	0.367289835	0.428568677	0.339206841	0.418074129	0.396187657	0.251835933	0.071729347	0.074082967	0.07178376	0.071953727	0.072903863	0.097314764	0.073009278	0.072578163	0.072142832	0.072255023	0.072733148
490	0.732069406	0.694435329	0.654062022	0.709318637	0.720994722	0.70612163	0.654987449	0.739866306	0.720599936	0.544882367	0.529995055	0.467993705	0.392761766	0.271946064	0.156213687	0.423598917	0.437932775	0.371730513	0.471527118	0.401398059	0.206996682	0.125572454	0.105641089	0.39040895	0.373181744	0.363305893	0.079667979	0.074417336	0.075045258	0.073801732	0.083084688	0.071857496	0.317891171	0.373274448	0.291407415	0.36549823	0.343786924	0.215425939	0.071303635	0.072935024	0.071346661	0.071850246	0.073775657	0.088815366	0.073588914	0.072715817	0.071299418	0.071654792	0.071724414
491	0.694898595	0.651276058	0.607932425	0.668410044	0.682510063	0.665311707	0.608120607	0.724869475	0.726183035	0.491247386	0.473765532	0.411352863	0.33905118	0.22724198	0.131351404	0.371003379	0.38418399	0.320808814	0.415255435	0.347033019	0.171493493	0.108932837	0.094799239	0.336508672	0.320329528	0.310547121	0.077221199	0.074038753	0.074298937	0.07470839	0.077315245	0.072076718	0.270814281	0.319665682	0.246612813	0.31444107	0.293398851	0.183556443	0.071632311	0.072732984	0.071667257	0.072408207	0.075028932	0.083293799	0.074629891	0.073442085	0.071327186	0.07185516	0.071632544
492	0.650088202	0.603319399	0.55852664	0.621642079	0.637132179	0.618993736	0.558128159	0.69697656	0.715132058	0.437218543	0.417659181	0.35573195	0.287677174	0.188243488	0.113138077	0.319797371	0.331685065	0.272314377	0.359932414	0.294855655	0.143019303	0.097364764	0.087583119	0.285013364	0.270214313	0.260885825	0.076070339	0.074386171	0.074381495	0.075982165	0.073851276	0.072864446	0.227426317	0.268935689	0.206269613	0.266045116	0.246341289	0.156998393	0.072500646	0.073208539	0.07252976	0.073439212	0.076554708	0.079926213	0.076002497	0.074590712	0.071979773	0.072630069	0.072198327
493	0.600586607	0.552426008	0.50715464	0.571260605	0.587489665	0.56925917	0.506292156	0.660092703	0.690597654	0.383526145	0.362444384	0.302237736	0.240141096	0.156184209	0.100392188	0.271079537	0.281513731	0.227657606	0.306556857	0.246258495	0.121530282	0.089608239	0.082995661	0.237386584	0.224360221	0.215925253	0.075850449	0.075253849	0.075058061	0.077518244	0.072016497	0.074057894	0.189230513	0.222632318	0.171769172	0.221770991	0.204188422	0.135985578	0.073752629	0.074166981	0.073777429	0.074806261	0.078273911	0.078106096	0.07761216	0.076040544	0.073078166	0.073815014	0.07323346
494	0.548228078	0.499820607	0.454752355	0.518714583	0.535250576	0.517465191	0.453524857	0.617201454	0.656295458	0.331036423	0.309115541	0.252333853	0.19814212	0.131409197	0.091795155	0.226311047	0.235118359	0.188430311	0.256501019	0.202930198	0.106101081	0.084634269	0.080310115	0.195334167	0.184447695	0.177316972	0.076304919	0.076496965	0.076163472	0.079243171	0.071347222	0.075542682	0.157461866	0.182463917	0.143964008	0.183213461	0.168445255	0.120128389	0.075278846	0.075471877	0.075300364	0.07641335	0.080131566	0.077406379	0.079392698	0.077706623	0.074496634	0.075294411	0.074605692
495	0.494305001	0.446439682	0.402140947	0.46507395	0.481615967	0.464612546	0.400631292	0.57042037	0.615301037	0.280892498	0.259003917	0.207739512	0.163140897	0.113349855	0.086228876	0.187092621	0.19414061	0.155942534	0.211440147	0.166441591	0.095478837	0.081662124	0.078987387	0.160338313	0.15178738	0.146203113	0.077242693	0.078007845	0.07757489	0.081102862	0.071504199	0.07723406	0.132637375	0.149743153	0.122877271	0.15160473	0.140007193	0.108677184	0.076998388	0.077022339	0.077017304	0.078189644	0.082087559	0.077509996	0.08129549	0.079526287	0.076141923	0.0769826	0.0762169
496	0.439763776	0.393092489	0.350183398	0.411198345	0.427499769	0.411503954	0.348468514	0.521182073	0.569851645	0.234583342	0.213777251	0.170084827	0.135797271	0.100791611	0.082848073	0.154717041	0.160001899	0.13069255	0.17304912	0.137651218	0.088442304	0.080132508	0.078645506	0.13306225	0.12675353	0.122700949	0.078528317	0.079710613	0.079205616	0.083059821	0.072250585	0.079072641	0.114332852	0.124798868	0.107709727	0.127293516	0.118751759	0.100742388	0.078854776	0.078747906	0.078871528	0.080085884	0.084114474	0.07819247	0.083286944	0.081455955	0.077948562	0.07881954	0.077998143
497	0.385455944	0.340663365	0.299942765	0.357957418	0.373764774	0.358954911	0.298104145	0.470518486	0.521538459	0.193768049	0.175113755	0.140321263	0.1157394	0.092399598	0.081032916	0.129663904	0.133357434	0.1122195	0.142411076	0.116361562	0.083999804	0.079639937	0.079008503	0.113108283	0.108696468	0.105953068	0.080064004	0.081551048	0.080993537	0.085087819	0.073416678	0.08101629	0.101493375	0.106908042	0.097277522	0.10967376	0.103713857	0.095496455	0.080808169	0.080598798	0.080823019	0.082067495	0.086193496	0.079291536	0.085343672	0.083464999	0.079869974	0.080762617	0.079900323
498	0.332332128	0.290271808	0.252780396	0.306405799	0.32140769	0.307964387	0.250912045	0.419243335	0.471494541	0.159860484	0.144144678	0.118297402	0.101770056	0.087019778	0.080343979	0.111406717	0.113816666	0.099352256	0.119537738	0.101447751	0.081421106	0.079895961	0.079880168	0.099242253	0.096278157	0.094540116	0.081780494	0.083491346	0.082895179	0.087169123	0.074882368	0.08303591	0.092843408	0.094666549	0.090381439	0.097494031	0.093517111	0.092256958	0.082831307	0.082540799	0.082844394	0.084110989	0.08831228	0.080691715	0.087449979	0.085532564	0.081873879	0.082782394	0.081889347
499	0.281612032	0.24335769	0.210300521	0.257906208	0.271709505	0.259839474	0.208506786	0.368151492	0.420630001	0.133474204	0.120941931	0.102880524	0.092423163	0.083794041	0.080465179	0.098726773	0.100193274	0.090731371	0.103408422	0.091416791	0.080185639	0.080691395	0.081118226	0.089974211	0.088049502	0.087040732	0.083628067	0.085504912	0.084879796	0.089291756	0.076560819	0.085111272	0.087254945	0.086589957	0.086048336	0.089388428	0.086859978	0.090499228	0.08490546	0.08455014	0.084916828	0.08620038	0.090462831	0.082309365	0.089595375	0.087644407	0.083937728	0.084858397	0.083941343
500	0.234839416	0.201578972	0.174046034	0.21409524	0.226254767	0.216173717	0.172423716	0.318179934	0.369817164	0.114169453	0.104531068	0.09252702	0.086406439	0.082111988	0.081168018	0.090246356	0.091056368	0.085183805	0.092509397	0.084909883	0.079918339	0.081874864	0.082620005	0.084007419	0.082814612	0.082327035	0.085571464	0.087573394	0.086926024	0.091447945	0.078389816	0.087228652	0.08386876	0.081474079	0.083560484	0.084216041	0.08273139	0.089828134	0.087018103	0.086610575	0.087027725	0.088325122	0.092640314	0.084084418	0.091773182	0.089791123	0.086046124	0.086976732	0.08603995
501	0.193726426	0.166440348	0.144992348	0.176594466	0.186722087	0.178581923	0.143603164	0.27053455	0.320051397	0.100731796	0.093414011	0.08581926	0.082753689	0.081536654	0.08228787	0.084796458	0.085156752	0.081834526	0.085399269	0.080901663	0.08034651	0.083337584	0.084312096	0.080382262	0.07970676	0.079593167	0.087586117	0.089684489	0.089019385	0.093632995	0.080325437	0.089379099	0.082065227	0.078456389	0.082400603	0.081138844	0.080408058	0.089948671	0.08916121	0.088711258	0.089169001	0.090478596	0.09484218	0.085974287	0.093979515	0.091966853	0.088188924	0.089128331	0.088174327
502	0.159709528	0.138748357	0.123147241	0.146482357	0.154403185	0.148191873	0.122001221	0.226717038	0.272575849	0.091728733	0.086142816	0.081686789	0.080783665	0.081752101	0.083706809	0.081513452	0.081564016	0.08006103	0.080971003	0.078671563	0.081272811	0.085001792	0.086142364	0.078425885	0.078118021	0.07827344	0.089655174	0.091830234	0.091150351	0.095844419	0.08233706	0.091557094	0.081398608	0.076935475	0.082194088	0.079562839	0.07937722	0.090643167	0.091329931	0.090845157	0.091335765	0.092656955	0.097067501	0.087949087	0.096212508	0.094168281	0.090359766	0.091307601	0.090337599
503	0.133381929	0.118268016	0.107605304	0.123835937	0.12967563	0.125174013	0.106669922	0.188342326	0.228906471	0.085924004	0.081597124	0.079380309	0.080014221	0.082530863	0.08534071	0.079784722	0.079620753	0.079418092	0.07844622	0.07771221	0.082555731	0.086812122	0.088073989	0.077662399	0.077615721	0.077963885	0.091767289	0.094005738	0.0933129	0.098081305	0.084403589	0.093759557	0.081546172	0.076484115	0.082669531	0.079062903	0.079270368	0.0917532	0.093521643	0.093007941	0.093525356	0.094858287	0.099316497	0.089988036	0.098471741	0.096393908	0.09255497	0.093511417	0.092525711
504	0.114240285	0.103900419	0.09701575	0.107745937	0.111861213	0.108711699	0.096241142	0.156697746	0.190653206	0.082400717	0.078986771	0.07837468	0.080099311	0.083710756	0.087129784	0.079171756	0.078859286	0.079583981	0.077279977	0.077659628	0.084094339	0.088729391	0.090081173	0.077749667	0.077888129	0.078373583	0.093915044	0.096208295	0.095503501	0.100343879	0.08651075	0.095985148	0.082275128	0.07679479	0.083631912	0.079331955	0.079821915	0.093164686	0.095735291	0.095197209	0.095736685	0.097082048	0.101590212	0.09207689	0.100757856	0.098643537	0.09477277	0.095738416	0.094736615
505	0.100995705	0.094225931	0.090077648	0.096804777	0.099617376	0.097450552	0.08941759	0.132218861	0.159074659	0.080513568	0.077761256	0.078296662	0.080792255	0.085177442	0.089032044	0.079359209	0.078944287	0.080328297	0.077084921	0.07825352	0.085817256	0.090726295	0.092146201	0.078443274	0.078712855	0.07929555	0.096093894	0.098436796	0.097720438	0.102633221	0.088649237	0.098233803	0.083420016	0.077648338	0.084943043	0.080150481	0.08084304	0.094796496	0.097970964	0.097411992	0.097969815	0.099328698	0.103890321	0.09420619	0.1030723	0.100917943	0.097012799	0.097988526	0.096969727
506	0.092196915	0.087969999	0.085761094	0.089653471	0.09153224	0.090046181	0.085180114	0.114385216	0.134619356	0.079794963	0.077521146	0.078874952	0.081915254	0.086848782	0.09101766	0.08011691	0.079631193	0.081484213	0.077578774	0.079305618	0.087673197	0.092783661	0.094256879	0.079566649	0.079929382	0.080580655	0.098301258	0.100691232	0.099963247	0.104951029	0.090813115	0.100506343	0.084861528	0.078886667	0.086503395	0.081359765	0.082197687	0.096590111	0.100229543	0.099652326	0.100225596	0.101599396	0.106218968	0.096369744	0.105417114	0.103218589	0.099275652	0.100262572	0.099225468
507	0.086587632	0.084147767	0.083313039	0.08520321	0.086423224	0.085402992	0.0827863	0.102023689	0.116788564	0.079909765	0.07798118	0.079917509	0.083343145	0.088667086	0.093066112	0.081281096	0.080746211	0.08293365	0.07856107	0.080682932	0.089626307	0.094888538	0.096405238	0.080995116	0.081424348	0.082123688	0.100536077	0.102972465	0.102232441	0.107299525	0.092999004	0.102804295	0.086515461	0.080398127	0.088242838	0.082847557	0.083789866	0.098504405	0.102512537	0.101919043	0.102505509	0.10389587	0.108578705	0.098563875	0.107794853	0.105547505	0.101562682	0.102562093	0.101505049
508	0.083236316	0.082057229	0.082199223	0.08267008	0.08342411	0.082724554	0.081709663	0.093797713	0.104423336	0.080617987	0.078938358	0.081289055	0.084987938	0.090592073	0.09516352	0.082735691	0.082166356	0.084593173	0.079890143	0.082291626	0.091651798	0.097032417	0.098586329	0.082640713	0.083117756	0.083850485	0.102798403	0.105282017	0.104529264	0.10968136	0.095205337	0.105129723	0.08832257	0.082103896	0.09011218	0.084534583	0.085551961	0.100510729	0.104821938	0.104213585	0.104811515	0.106220286	0.110972442	0.100786711	0.110208507	0.107907176	0.103875814	0.104889169	0.103810269
509	0.081489076	0.081202067	0.082037291	0.08150249	0.081925939	0.081448189	0.081573086	0.088561107	0.096197897	0.081748541	0.080248715	0.082894142	0.086787688	0.092595802	0.097300699	0.084398328	0.083804478	0.086403808	0.081465764	0.084065362	0.093732741	0.099209941	0.100797353	0.084441306	0.084953141	0.085708789	0.105089108	0.107621921	0.10685552	0.11209957	0.097431823	0.107485121	0.090241296	0.08394832	0.09207708	0.086364864	0.087436424	0.102589284	0.107160124	0.10653788	0.10714596	0.10857518	0.113403418	0.103037686	0.112661461	0.110300473	0.106217421	0.10724632	0.106143389
510	0.080882256	0.081225668	0.082551476	0.08130585	0.081495039	0.081171065	0.082104559	0.085458682	0.090970441	0.083179463	0.081809736	0.084664977	0.088698667	0.094658977	0.099471759	0.086210263	0.085598479	0.088323779	0.083216521	0.085957091	0.095857692	0.10141798	0.103037051	0.086352879	0.086890577	0.087661749	0.107409704	0.109994647	0.109213482	0.114557559	0.099679081	0.109873359	0.092242507	0.08589205	0.094113627	0.088298797	0.089409813	0.104726552	0.109529813	0.10889427	0.109511526	0.110963419	0.115875214	0.105317198	0.115157496	0.112730625	0.108590259	0.109636441	0.108507055
511	0.081084341	0.081872473	0.083545075	0.08179749	0.081820943	0.081603889	0.083109983	0.083879513	0.087882591	0.084824401	0.083548912	0.086553991	0.090690565	0.096768641	0.101673238	0.088130186	0.087504693	0.090324032	0.085092126	0.08793402	0.09801926	0.103655062	0.10530532	0.088344832	0.088902391	0.089683907	0.109762218	0.112403048	0.111605817	0.117059098	0.101948413	0.112297648	0.094306234	0.08790783	0.09620557	0.090308902	0.0914491	0.106913599	0.111934039	0.111285464	0.111911207	0.113388186	0.118391758	0.107626385	0.11770079	0.115201213	0.110997422	0.112062773	0.110904254
512	0.081864836	0.082965499	0.084882516	0.082781455	0.082688015	0.082545369	0.084455461	0.08339703	0.086333708	0.08662401	0.085416552	0.088529046	0.092743262	0.098916622	0.103903537	0.090130177	0.089493583	0.092385239	0.087058472	0.089974249	0.100213135	0.105921002	0.107602979	0.090396804	0.090970254	0.091758469	0.112149144	0.114850365	0.114035588	0.119608377	0.104241669	0.114761561	0.096419461	0.089977623	0.098342469	0.092376947	0.093539168	0.109144991	0.114376164	0.113714545	0.114348321	0.115853008	0.120957398	0.109967012	0.120295987	0.117716203	0.113442358	0.114528925	0.11333832
513	0.083048825	0.084370645	0.086461174	0.084109272	0.083932743	0.083842699	0.08603957	0.083683485	0.085864243	0.088533559	0.087375326	0.090566285	0.094842057	0.101097284	0.106162057	0.092189553	0.091543242	0.094493279	0.089090181	0.09206171	0.102436654	0.108216329	0.109931369	0.092493907	0.093080823	0.093873253	0.114573285	0.117340131	0.116506145	0.122209935	0.106561022	0.117268955	0.098572873	0.092088312	0.100516965	0.094489646	0.09566911	0.111417177	0.116859816	0.116184878	0.116826448	0.118361685	0.123576834	0.112341221	0.122948124	0.120279882	0.115928788	0.117038793	0.115812859
514	0.084517553	0.085996952	0.088211578	0.085680259	0.085444204	0.085392038	0.087793595	0.084513125	0.086157382	0.090523149	0.08940044	0.09265019	0.096977672	0.103307531	0.10844922	0.094294926	0.093639452	0.096639267	0.091170691	0.094186202	0.104688809	0.110542305	0.112292391	0.094626751	0.095225773	0.096020719	0.117037819	0.119876251	0.1190212	0.124868779	0.108909002	0.119824066	0.100760872	0.094231734	0.102724796	0.096638693	0.097832246	0.113728501	0.119388965	0.118700182	0.1193495	0.120918385	0.126255248	0.11475158	0.125662771	0.122896968	0.118460793	0.119596652	0.11833182
515	0.086188821	0.087781421	0.090085743	0.087424732	0.087145658	0.08712139	0.089670042	0.085728748	0.086991733	0.092572531	0.091475275	0.094770709	0.099144424	0.105546009	0.110766212	0.096437644	0.095772996	0.098817756	0.093289185	0.096341361	0.106969759	0.112900785	0.114688428	0.096789549	0.09740007	0.098196372	0.119546319	0.122463058	0.121584876	0.127590481	0.111288457	0.122431556	0.102980356	0.096402975	0.104963813	0.098819045	0.100024702	0.116078742	0.121967985	0.121264598	0.12192179	0.12352771	0.128998414	0.117201069	0.128446144	0.125572681	0.121042857	0.122207215	0.120899548
516	0.088005355	0.089680276	0.092050525	0.089294229	0.088983693	0.088980593	0.09163609	0.087220236	0.088211831	0.094668147	0.093588864	0.096921512	0.101339056	0.107812542	0.113114766	0.098612344	0.09793811	0.101025671	0.095438798	0.098523453	0.109280481	0.115294068	0.117122251	0.098978983	0.099600935	0.100397804	0.122102734	0.125105326	0.124201713	0.130381224	0.113702512	0.125096552	0.105229931	0.098599346	0.107233309	0.101027916	0.102244515	0.118468663	0.124601675	0.123882692	0.124548046	0.126194726	0.131812755	0.11969303	0.131305157	0.128312793	0.123679897	0.124875658	0.123520801
517	0.089927199	0.09166315	0.094083138	0.091255061	0.090921102	0.090934713	0.093669171	0.088910128	0.089708174	0.096801102	0.095734159	0.099098825	0.103559989	0.110107795	0.115497049	0.100815958	0.100131434	0.103261594	0.097615402	0.100730568	0.111622555	0.117724834	0.119596983	0.101193445	0.101827162	0.102624052	0.124711423	0.127808329	0.126876719	0.133247912	0.116154573	0.127824715	0.107509407	0.100819701	0.109533597	0.103264089	0.10449106	0.120899759	0.127295329	0.126559508	0.12723348	0.128925036	0.134705461	0.122231165	0.134247562	0.131123721	0.126377329	0.127607703	0.126200818
518	0.0919296	0.093711473	0.096169885	0.09328652	0.092934909	0.092962225	0.095755721	0.090749548	0.091411525	0.098966586	0.097907548	0.101301129	0.105807138	0.112433228	0.117915706	0.10304747	0.102351744	0.105525606	0.099817276	0.102962414	0.113998184	0.120196221	0.122116213	0.103432854	0.104078952	0.104875453	0.127377341	0.130578109	0.129615614	0.136198587	0.118648435	0.130622535	0.109819716	0.103064275	0.111865961	0.105527771	0.106764929	0.123374306	0.130055008	0.129300825	0.129984055	0.131725085	0.137684952	0.124819689	0.137282436	0.134012897	0.129141342	0.130409909	0.128945575
519	0.093986187	0.095805386	0.09829604	0.095366491	0.095000605	0.095040167	0.097881162	0.092686648	0.09324842	0.101159307	0.100105021	0.103526637	0.108080249	0.114790228	0.120373376	0.10530562	0.104597561	0.107817619	0.102042418	0.105218516	0.116409532	0.122711377	0.124683551	0.105696957	0.106356348	0.1071522	0.130105505	0.133420792	0.132424198	0.139241421	0.121187936	0.133496605	0.112161674	0.10533315	0.114231593	0.107819011	0.109066581	0.125894525	0.13288686	0.1321125	0.132805819	0.134601414	0.140759788	0.127462854	0.140419005	0.136987872	0.131978217	0.133288939	0.131761136
520	0.09608553	0.097936586	0.100455733	0.097485586	0.09710765	0.097158747	0.100039699	0.094697836	0.095185147	0.103377936	0.102325899	0.105775742	0.110380519	0.117180978	0.122873212	0.107591123	0.106869469	0.110138999	0.104291158	0.10749997	0.118859403	0.125273962	0.127303144	0.107986981	0.108660763	0.109455749	0.132901658	0.136343448	0.135309146	0.142385985	0.12377739	0.136454545	0.114537193	0.107627749	0.116632639	0.110139234	0.111397659	0.128463424	0.135797977	0.135001283	0.135705746	0.1375616	0.143940035	0.130165521	0.143668128	0.140057448	0.134895194	0.136252495	0.134654484
521	0.098221297	0.10010073	0.102646204	0.099638777	0.099250277	0.099312646	0.1022286	0.096768823	0.09720094	0.105622634	0.104570763	0.108049744	0.112709857	0.119608212	0.125418926	0.109905594	0.109168952	0.112491861	0.106564775	0.109808598	0.121351163	0.12788827	0.129979853	0.110304855	0.11099429	0.111788198	0.135772652	0.139354643	0.138278505	0.145644196	0.126421776	0.139505619	0.116948872	0.109950147	0.119071904	0.11249059	0.113760465	0.131084798	0.13879697	0.137975347	0.138692296	0.14061491	0.147238349	0.132933429	0.147043411	0.143232494	0.137901022	0.139309943	0.13763404
522	0.100384897	0.102291728	0.104863332	0.101819107	0.101420603	0.101494572	0.104443788	0.098881185	0.099269221	0.107892943	0.106839674	0.110349586	0.115069925	0.122074532	0.128014151	0.112250323	0.111497163	0.114878079	0.108864176	0.112145962	0.123888075	0.130558525	0.132718477	0.112652264	0.113358797	0.114151433	0.138725267	0.142462865	0.14134025	0.149027878	0.129126026	0.142659017	0.119399122	0.112302201	0.121552029	0.114874995	0.116157098	0.133762299	0.141892377	0.14104279	0.141773857	0.143770533	0.150667294	0.135772248	0.150558363	0.146523791	0.141004381	0.142470571	0.140708155
523	0.102575899	0.104509817	0.107107889	0.104026579	0.103618373	0.103704436	0.106686038	0.101031853	0.101384833	0.110190694	0.109134621	0.112677544	0.117463397	0.124583304	0.130663301	0.114627905	0.113856576	0.117300593	0.111191685	0.114514681	0.126474187	0.13328985	0.135524847	0.115031909	0.115757129	0.116548255	0.141767917	0.145678837	0.144504404	0.152552388	0.131896068	0.145926401	0.121891301	0.114686709	0.124076555	0.117295387	0.118590576	0.136500622	0.145095013	0.14421382	0.144961044	0.147040192	0.154243348	0.138688936	0.154230641	0.149945232	0.144216223	0.145746168	0.143887346
524	0.104792589	0.106754256	0.109379897	0.106260102	0.105842128	0.10594105	0.108955387	0.103215451	0.103539334	0.112517433	0.111457362	0.11503578	0.119892936	0.127138035	0.133371103	0.117040882	0.116249589	0.119762369	0.113549507	0.116917349	0.129113789	0.136087785	0.138405319	0.117446484	0.118192151	0.118981489	0.144909967	0.149014654	0.147782235	0.156235405	0.134738385	0.149320987	0.124428875	0.117106485	0.126649167	0.119754733	0.121063981	0.139304769	0.148417113	0.147499928	0.148265863	0.150437223	0.15798563	0.14169115	0.158080667	0.153512726	0.14754891	0.149150093	0.147183473
525	0.107034635	0.109025391	0.111680239	0.108519772	0.108091703	0.108204458	0.111252725	0.105429199	0.10572788	0.114875152	0.113810044	0.117426753	0.122361487	0.129742534	0.136142706	0.119492123	0.118678921	0.122266687	0.115940163	0.119356839	0.131811547	0.138958394	0.141366887	0.119898963	0.120667011	0.121454233	0.148161902	0.152484042	0.151186483	0.160097409	0.137660103	0.15285783	0.127015645	0.119564616	0.129273896	0.12225631	0.123580685	0.142180242	0.151872609	0.150914129	0.151701981	0.153976891	0.161916496	0.144787385	0.162132195	0.157244596	0.151016468	0.152697555	0.150609965
526	0.109303411	0.111324947	0.114010912	0.11080717	0.110368539	0.110496263	0.113580054	0.107673544	0.107950047	0.117266531	0.116195419	0.119853459	0.124872578	0.132401383	0.138984432	0.121985141	0.1211479	0.124817519	0.118366742	0.121836598	0.134573138	0.141909237	0.144418389	0.122392906	0.123185484	0.123970185	0.151537516	0.156105568	0.154734261	0.164167256	0.140670238	0.15655745	0.129656224	0.122064781	0.131955641	0.124804067	0.126144745	0.145133884	0.155480473	0.154473961	0.155287988	0.157680213	0.16606799	0.147988586	0.166418952	0.161166374	0.154637852	0.156409276	0.154184936
527	0.111597681	0.113652555	0.116372233	0.113121613	0.112671624	0.112815696	0.115937699	0.109943984	0.110198622	0.11969325	0.118615362	0.122318139	0.127428934	0.135118129	0.141901049	0.124522555	0.123659002	0.127417891	0.120831531	0.124359282	0.137402893	0.144945897	0.147566233	0.124931065	0.125750491	0.126532223	0.155046265	0.159891466	0.15843696	0.168462883	0.143775319	0.160433221	0.132354131	0.124609849	0.134698138	0.127401034	0.128759293	0.148170756	0.159253087	0.158191045	0.159036037	0.161560695	0.170459544	0.151302478	0.170961667	0.165294186	0.158425566	0.160298773	0.157920372
528	0.113920354	0.116011237	0.11876732	0.115466056	0.115003857	0.115165787	0.11832877	0.11224367	0.112476855	0.12215883	0.121073408	0.124824559	0.130035001	0.137898636	0.144900903	0.127108835	0.126216445	0.130072863	0.123338422	0.126929218	0.140308213	0.148078535	0.150822496	0.127517916	0.128366795	0.129144999	0.158707951	0.163869334	0.162319798	0.173029487	0.1469877	0.164515926	0.135115307	0.127204442	0.137507723	0.130052233	0.131429484	0.151299981	0.163218933	0.162091343	0.162974019	0.165650353	0.175142653	0.154744373	0.175813642	0.16966744	0.162407729	0.164397091	0.161843059
529	0.116272316	0.118402352	0.121197911	0.117841672	0.117366229	0.117547712	0.120755005	0.11457204	0.114782927	0.124665864	0.123572251	0.127375703	0.132694338	0.140747563	0.147990473	0.129747498	0.128823554	0.132786443	0.125890488	0.129549872	0.143294898	0.151314921	0.154196292	0.130157047	0.131038204	0.131812246	0.162536964	0.168058724	0.166400756	0.17789797	0.150316688	0.168827228	0.137944435	0.129852274	0.14038938	0.132761655	0.134159425	0.154528566	0.167398061	0.166193308	0.167121584	0.169971501	0.180151985	0.158325615	0.181011091	0.174313339	0.166604286	0.168726092	0.165972032
530	0.118656816	0.120829325	0.123667589	0.120251791	0.119761992	0.119964895	0.123219971	0.116932569	0.11712039	0.127218462	0.126116005	0.129976003	0.13541228	0.143672152	0.151180441	0.132443903	0.131485356	0.135564777	0.12849231	0.132226413	0.146372274	0.154668302	0.157703651	0.132853819	0.133770462	0.134539569	0.166560987	0.172499661	0.170716091	0.183137592	0.153778712	0.17341212	0.140848865	0.1325589	0.143350998	0.1355354	0.136955403	0.15786827	0.171832292	0.170534465	0.171519667	0.174571919	0.185568902	0.162067036	0.186636278	0.17929131	0.171055819	0.173331065	0.170345835
531	0.121075628	0.123294288	0.126178776	0.122698395	0.122192987	0.122419354	0.125726081	0.119326231	0.119489477	0.129819767	0.128707881	0.132628965	0.138193024	0.146677987	0.154478794	0.135202231	0.134205789	0.138412643	0.131147506	0.134962918	0.149547407	0.158148417	0.161356171	0.135612456	0.136568073	0.137331371	0.170799211	0.177219113	0.175290401	0.18879324	0.15738564	0.178300721	0.143834235	0.135328693	0.146398604	0.138378215	0.139822305	0.161327806	0.176549576	0.175140176	0.176195642	0.179483185	0.191445181	0.165983398	0.192742216	0.18464028	0.175789741	0.178242356	0.174990562
532	0.12353191	0.125800703	0.128735199	0.125184801	0.124662408	0.124914508	0.128277044	0.121756089	0.121893044	0.13247426	0.131352374	0.135339503	0.141042602	0.149773466	0.15789831	0.138028514	0.136990485	0.141337052	0.133861159	0.137765208	0.152831298	0.161771372	0.165173645	0.138439014	0.13943756	0.140194013	0.175287438	0.182270592	0.180171799	0.194962361	0.161157759	0.18355352	0.146909068	0.138167947	0.149541403	0.14129706	0.142767333	0.164921315	0.181606516	0.180060484	0.181204899	0.184770992	0.197898889	0.170100999	0.199445291	0.190442556	0.180859933	0.183520699	0.179957258
533	0.126028518	0.128351778	0.131340366	0.127714058	0.127173166	0.127453494	0.130876349	0.124224678	0.124333231	0.135186265	0.134053845	0.138112406	0.143966904	0.152966816	0.161451571	0.140928627	0.139844929	0.144344857	0.136638219	0.140638964	0.15623475	0.16555307	0.169175677	0.141339407	0.142385296	0.143133708	0.180061547	0.187708236	0.185408862	0.201745212	0.165115146	0.18923176	0.150081707	0.141082812	0.152788417	0.144298733	0.145797535	0.168662731	0.187060651	0.185346007	0.186603742	0.190502492	0.20505307	0.17444602	0.206865377	0.196782335	0.186320709	0.189227517	0.185297344
534	0.12856867	0.130951145	0.133998267	0.13028961	0.12972854	0.130039867	0.133527965	0.126734902	0.126812534	0.137960756	0.136817305	0.140953228	0.146972879	0.156268001	0.16515434	0.143909489	0.142775546	0.147444223	0.139484432	0.143590862	0.159771089	0.169513793	0.17338769	0.144320604	0.145418837	0.146157817	0.185170358	0.193608179	0.191069425	0.209289743	0.169283797	0.195421928	0.153362275	0.144080559	0.156150658	0.147391337	0.148921344	0.172569642	0.192993928	0.191067807	0.192472348	0.196774819	0.213094766	0.179053221	0.215180126	0.203782011	0.192247788	0.195449309	0.191082333
535	0.131155755	0.133602651	0.136713149	0.132915094	0.132331991	0.132677385	0.13623611	0.129289808	0.129333552	0.140803092	0.139648153	0.143867999	0.150068161	0.159688184	0.169024767	0.146978671	0.145789349	0.150644182	0.142406033	0.146628212	0.16345545	0.173677246	0.177839845	0.147390249	0.148546509	0.149274441	0.190674413	0.200067827	0.197239722	0.217794478	0.173694409	0.202234912	0.156762118	0.147169184	0.159640539	0.150583829	0.152148121	0.176662463	0.199512656	0.197316762	0.198914722	0.203716018	0.222283251	0.183964718	0.224628659	0.211603234	0.198736934	0.202296593	0.197402458
536	0.133793474	0.136310488	0.139489641	0.135594477	0.134987292	0.135370148	0.139005384	0.131892789	0.131899259	0.14371914	0.142552306	0.146863367	0.153261261	0.163240059	0.173084091	0.150144592	0.148894116	0.153954882	0.145409897	0.149759139	0.167305298	0.178071597	0.182568521	0.150556854	0.151777625	0.152492631	0.196650012	0.20721372	0.204031113	0.227529201	0.178383785	0.209814924	0.160294176	0.150357614	0.163272285	0.153886271	0.155488423	0.180965309	0.206756953	0.204210986	0.206067951	0.211497477	0.232982027	0.189232404	0.235536647	0.220462408	0.205910973	0.209912565	0.204373191
537	0.136485876	0.139079258	0.142332843	0.138332107	0.137698576	0.138122659	0.141840847	0.134547598	0.134512973	0.146715425	0.145536339	0.149946783	0.156561856	0.16693841	0.177357878	0.153416793	0.152098622	0.157387961	0.148503724	0.15299284	0.171341302	0.182731368	0.187619087	0.153830078	0.155122813	0.155822705	0.203197217	0.215217523	0.21159367	0.238878179	0.183397399	0.218357743	0.163973554	0.15365601	0.16706261	0.157310196	0.158954413	0.185507578	0.214920172	0.211910969	0.214121223	0.220359642	0.245725735	0.194922596	0.248369026	0.230662871	0.213933978	0.218490709	0.21214835
538	0.139237352	0.141913974	0.145248337	0.141132713	0.140470327	0.140939816	0.144748039	0.137258295	0.137178278	0.149799173	0.14860754	0.153126582	0.159980924	0.170800419	0.181876872	0.156806052	0.155412749	0.160956747	0.15169612	0.156339703	0.17558789	0.187698823	0.19304806	0.157220855	0.158594177	0.159276389	0.210446922	0.224311118	0.220128832	0.252383724	0.188791294	0.228127961	0.167817874	0.15707591	0.171031139	0.160868805	0.162560087	0.19032512	0.22426803	0.220634051	0.223334574	0.230637798	0.261289659	0.201119915	0.263783059	0.242626837	0.223024258	0.228291244	0.220932005
539	0.142052736	0.144820196	0.148242357	0.144001521	0.143307491	0.143827043	0.147733136	0.140029333	0.139899092	0.152978582	0.151774179	0.156412333	0.163531315	0.174846858	0.186679902	0.160324915	0.158847944	0.16467703	0.154996954	0.159811812	0.180075218	0.193028577	0.198930087	0.16074194	0.162205952	0.162867447	0.218582637	0.234832068	0.229927549	0.268873051	0.194638336	0.239511229	0.171848555	0.160630837	0.175201928	0.164577726	0.166322138	0.195464127	0.235195772	0.230698023	0.234094873	0.242837833	0.280883676	0.207939463	0.282783217	0.256989708	0.233494192	0.239691072	0.231014977
540	0.144937281	0.147804006	0.151321761	0.146944235	0.146215451	0.146790259	0.150802931	0.142865529	0.14267963	0.156262812	0.155045498	0.159814867	0.167227847	0.179102463	0.191815275	0.163987769	0.16241727	0.168567251	0.158417374	0.16342301	0.184839941	0.198790108	0.205362153	0.164407985	0.165974629	0.166611779	0.227856575	0.247260357	0.241400297	0.289563114	0.201031642	0.253057644	0.176091265	0.164336395	0.179604063	0.168455191	0.170260192	0.200983312	0.248278034	0.242557546	0.246964722	0.257701241	0.306298803	0.215535004	0.306847971	0.274679123	0.245782372	0.253224387	0.242803596
541	0.147896774	0.150872146	0.154494211	0.149967162	0.149200141	0.149836016	0.153965001	0.14577216	0.145524492	0.159662268	0.158432003	0.163346672	0.171087991	0.183597506	0.197345022	0.167811453	0.166135938	0.172649468	0.161970201	0.167189484	0.189927934	0.205074755	0.212474589	0.168236182	0.169919753	0.17052817	0.238627137	0.262299281	0.255143947	0.316264005	0.20809433	0.269578302	0.180577659	0.168210995	0.184273764	0.172522989	0.174397924	0.206959862	0.264378145	0.256884748	0.262789612	0.276342012	0.340155401	0.224118977	0.338167027	0.29707513	0.26052807	0.269673751	0.25688634
542	0.150937595	0.154032106	0.157768283	0.153077288	0.152268118	0.152971576	0.157227821	0.148755009	0.148438687	0.163188827	0.161945683	0.16702224	0.175132523	0.188369434	0.203349753	0.171815834	0.170021784	0.176950328	0.165670265	0.171130307	0.195397263	0.212003966	0.220444329	0.172246849	0.174064684	0.174638989	0.251406108	0.280975295	0.272025076	0.351557598	0.2159915	0.290268947	0.185347207	0.172276534	0.189256665	0.176807406	0.178764186	0.213496401	0.284794464	0.274675023	0.282841584	0.300414965	0.386003085	0.233987194	0.379811745	0.326175966	0.27867142	0.290186507	0.274121813
543	0.15406682	0.157292261	0.161153654	0.156282401	0.155426667	0.156205034	0.160600934	0.151820439	0.151427699	0.166856168	0.165600343	0.170858577	0.179386491	0.193465337	0.209935972	0.176024642	0.174095974	0.181502482	0.169534895	0.175268227	0.201322632	0.219741706	0.229514866	0.176464314	0.178437731	0.178971238	0.266928644	0.304773949	0.293297675	0.398847159	0.224949194	0.316885575	0.190449926	0.176559414	0.194611223	0.181340621	0.183394685	0.220731454	0.311481011	0.297406775	0.309036382	0.332337954	0.44799234	0.245555884	0.43564296	0.364742915	0.301609008	0.3164426	0.295774526
544	0.157292331	0.160662019	0.164661301	0.15959122	0.158683914	0.159545458	0.164095149	0.154975477	0.154497543	0.170680173	0.169412009	0.174875851	0.183880469	0.198945229	0.217246065	0.180466549	0.178383911	0.186346452	0.173584539	0.179630695	0.207801378	0.228511492	0.240023682	0.180918043	0.183073614	0.183557915	0.286246193	0.335786731	0.320742066	0.461887255	0.235282378	0.351950772	0.195950001	0.181091862	0.200413286	0.186162532	0.188334201	0.228853875	0.347329389	0.327253197	0.344213038	0.375490806	0.529301946	0.259412357	0.509340099	0.416250078	0.331412202	0.350861322	0.323706921
545	0.160622953	0.164152012	0.168303771	0.163013569	0.162048983	0.163003061	0.167722791	0.158227917	0.157654844	0.174679456	0.173399456	0.179098249	0.188652247	0.204886546	0.225472292	0.185176604	0.182916424	0.191533138	0.177843579	0.184251225	0.214961753	0.238620346	0.252440711	0.185644156	0.188015438	0.188439845	0.310844466	0.376809944	0.35679321	0.543081192	0.247437672	0.398921329	0.201930743	0.185913709	0.206762398	0.191323226	0.193639604	0.238123046	0.396421947	0.367314177	0.392392896	0.434152483	0.628172847	0.276384511	0.601511369	0.484270637	0.371107049	0.396798576	0.360635114
546	0.164068621	0.167774331	0.172095504	0.166560573	0.165532163	0.16658941	0.171498015	0.161586434	0.160906922	0.178876036	0.177584881	0.183555106	0.193749111	0.211390383	0.234876645	0.190198141	0.18773136	0.197127182	0.182341396	0.189171234	0.222974527	0.250492697	0.267421907	0.190687463	0.193317338	0.193668163	0.342769065	0.431202902	0.404539439	0.639598103	0.262059584	0.462026912	0.208501263	0.191074802	0.213790381	0.196886302	0.199383939	0.248896122	0.463852309	0.421688928	0.45863725	0.51247759	0.731923577	0.297632391	0.704205635	0.570462284	0.424903579	0.458489769	0.410372722
547	0.167640581	0.171542815	0.176053253	0.170244923	0.169145137	0.170317689	0.175437196	0.165060729	0.164261902	0.183296214	0.181994798	0.18828243	0.199230954	0.218590202	0.245818864	0.195585297	0.192875675	0.203211364	0.187113801	0.19444249	0.232069284	0.26471733	0.285879745	0.196104212	0.199047978	0.199307687	0.384675157	0.501998669	0.467250801	0.738150537	0.280092728	0.544909025	0.215805052	0.196638238	0.221672466	0.202933263	0.205661827	0.261660997	0.553909956	0.494812188	0.547356946	0.61105927	0.816284335	0.32475182	0.796902592	0.670096924	0.497859317	0.539935979	0.477678137
548	0.171351644	0.175473414	0.180196611	0.174081182	0.17290125	0.174203017	0.179559431	0.1686617	0.167728837	0.187971713	0.186661203	0.193324959	0.205174565	0.226663933	0.258794615	0.201406236	0.198408142	0.209892026	0.192204938	0.200130398	0.242556879	0.282107828	0.309062381	0.201965795	0.205295057	0.205441523	0.43955605	0.589334484	0.546705122	0.815743515	0.302934608	0.646359438	0.224029857	0.202684631	0.230640242	0.20956904	0.212596204	0.277065628	0.664327374	0.58867406	0.656821287	0.720060306	0.860059034	0.359840084	0.855234021	0.766935258	0.593423414	0.640977195	0.566497739
549	0.17521649	0.179584637	0.184548648	0.178086176	0.176815841	0.178262845	0.18388715	0.172401646	0.17131785	0.192941085	0.191623081	0.198738886	0.211679328	0.235849974	0.27448268	0.207746921	0.204402597	0.217304778	0.197669777	0.206318164	0.254858373	0.303767486	0.338607425	0.208363538	0.212170594	0.212177056	0.509644068	0.685829453	0.639520592	0.854052518	0.332642341	0.753013844	0.233415994	0.209317308	0.240992622	0.21692805	0.220345497	0.295915194	0.777042063	0.696389799	0.76997594	0.814867643	0.861763046	0.405387251	0.87010016	0.836865971	0.706354696	0.749698799	0.674342549
550	0.179252055	0.183898107	0.189136709	0.18227948	0.180906666	0.182517456	0.188446895	0.176294514	0.175040322	0.198251468	0.196928391	0.20459557	0.218874943	0.246468268	0.29379819	0.214715202	0.210951662	0.225619307	0.203577447	0.213112059	0.269541096	0.331137288	0.376496525	0.215414911	0.219816737	0.219653817	0.593796989	0.773438537	0.732677073	0.853189484	0.372169446	0.837883744	0.244258359	0.216668351	0.253098157	0.225179819	0.229109705	0.319088615	0.859370608	0.795860247	0.854564702	0.868696889	0.834780099	0.463714914	0.851448502	0.864864233	0.813616508	0.839097693	0.783309456
551	0.183478002	0.188439244	0.193993338	0.186684005	0.185194409	0.186990567	0.193270247	0.180356208	0.178909101	0.203960628	0.202636574	0.210986382	0.226931414	0.258945971	0.317934332	0.222444485	0.218170493	0.23504126	0.210015501	0.220647628	0.287357123	0.365962359	0.424744447	0.223271138	0.228411393	0.228053204	0.683564048	0.830545624	0.804973082	0.825776425	0.425473611	0.877975028	0.256896096	0.224904604	0.267379677	0.234532201	0.239132602	0.347326553	0.889528286	0.858390068	0.887570517	0.875285792	0.79199857	0.535482525	0.81350837	0.855460693	0.881837502	0.883661725	0.861787669
552	0.187917299	0.193238079	0.199157337	0.191326699	0.189703306	0.19171007	0.198394945	0.184604954	0.182938765	0.210139381	0.208821749	0.218029076	0.236071839	0.273846464	0.348355583	0.231097101	0.226200775	0.245811892	0.217095446	0.22909727	0.309273717	0.410055101	0.484571351	0.232126712	0.238174559	0.237610653	0.761859309	0.847702923	0.84006917	0.783527665	0.496988588	0.873797792	0.27169264	0.234233731	0.284283062	0.245232512	0.25070042	0.380924901	0.874949762	0.87264491	0.874983997	0.848671721	0.740906429	0.616978594	0.765484439	0.822463933	0.896858541	0.881832587	0.889487243
553	0.192596925	0.198330267	0.204675086	0.196239425	0.194461914	0.196708947	0.2038663	0.18906175	0.187145931	0.216874794	0.215576927	0.225876194	0.246588566	0.291898157	0.386675613	0.240869495	0.23521653	0.258211345	0.224960121	0.238680649	0.336475077	0.464679417	0.554863276	0.242232106	0.249378866	0.248631569	0.810722416	0.832089414	0.838144922	0.733410572	0.589167224	0.841474139	0.28902354	0.244912543	0.3042518	0.257571571	0.264143902	0.419488532	0.835244513	0.850385993	0.836300044	0.804253914	0.685613761	0.697549574	0.712415417	0.776651597	0.872719962	0.850140966	0.874211682
554	0.197548778	0.203758407	0.210602396	0.201460088	0.199504097	0.202026449	0.209739119	0.193750926	0.191549646	0.224275008	0.223019864	0.234726382	0.258863702	0.314016898	0.434317613	0.252003326	0.245434831	0.272574166	0.23379398	0.24968067	0.370302	0.529406463	0.630239553	0.253912116	0.262369409	0.261513614	0.823768689	0.796263813	0.810551754	0.679343623	0.696314945	0.794657911	0.309290879	0.257262762	0.327731919	0.271899083	0.279854642	0.461867619	0.783388442	0.808045196	0.784938568	0.750864284	0.628398002	0.761418453	0.657102987	0.724182598	0.828489813	0.803258533	0.834870562
555	0.202810868	0.209573898	0.2170073	0.207034196	0.204870353	0.207709708	0.21608049	0.198700847	0.19617186	0.232476794	0.231301642	0.244840231	0.273395454	0.341307266	0.491805472	0.264805751	0.2571342	0.289319278	0.243838012	0.26246822	0.412067334	0.600533885	0.700293923	0.267592776	0.277595369	0.276778361	0.807784283	0.749348207	0.768221547	0.623523976	0.79752205	0.740683819	0.332956324	0.271699445	0.355195242	0.288653901	0.298318646	0.506199973	0.725670031	0.755610788	0.727435998	0.693100155	0.570490948	0.796176099	0.601057417	0.668512091	0.774769286	0.748968805	0.783888071
556	0.208428934	0.215839531	0.223974149	0.213017043	0.21060963	0.213815936	0.222973767	0.203944796	0.201038017	0.241656664	0.240619167	0.256562318	0.290829249	0.375001651	0.557544339	0.279678181	0.270681032	0.308985917	0.255411101	0.277537085	0.46262793	0.669946065	0.752555695	0.283837975	0.295650752	0.295112367	0.773367795	0.696600918	0.71793139	0.567160214	0.863487902	0.683420004	0.360558373	0.288772859	0.387130583	0.308402171	0.320155343	0.549961905	0.665349954	0.698207818	0.66717088	0.633416658	0.512586016	0.800234727	0.545082957	0.611535357	0.716677103	0.691313599	0.727349005
557	0.214458659	0.222633071	0.231609252	0.219476703	0.216781822	0.22041546	0.230524097	0.20952213	0.206177803	0.252046269	0.251233052	0.270350967	0.311986987	0.416256231	0.626340762	0.297150757	0.286563152	0.3322634	0.268939738	0.295548884	0.521565195	0.72643829	0.778830553	0.303394231	0.317318922	0.317412369	0.728403961	0.641001992	0.66354602	0.51092843	0.880761384	0.624913408	0.392677337	0.309220806	0.423949249	0.331871194	0.346143407	0.590096311	0.604112597	0.638588697	0.605897099	0.573106635	0.45513749	0.780575658	0.489612536	0.554272051	0.656896003	0.632421104	0.668443236
558	0.220968694	0.23005216	0.24004848	0.226498132	0.223461189	0.227595846	0.238866012	0.21547978	0.211626108	0.263953389	0.263492906	0.286816484	0.337878417	0.46568792	0.689000208	0.317920255	0.305430245	0.360002987	0.284998094	0.317385917	0.585985477	0.76057237	0.779096902	0.327237707	0.343612601	0.344819852	0.677656858	0.5842185	0.607253078	0.455246486	0.860070321	0.566216252	0.429821606	0.334026575	0.46577089	0.359965692	0.377212997	0.623419172	0.542839714	0.578221046	0.544534336	0.512895326	0.398570548	0.745602976	0.43491765	0.497291008	0.596768874	0.573373044	0.608815321
559	0.228044632	0.238220765	0.24946719	0.23418855	0.230740863	0.235467336	0.248173488	0.221874141	0.217424205	0.277789596	0.277871623	0.306765043	0.369662992	0.522578953	0.735023467	0.342884647	0.328137392	0.393189212	0.304357809	0.344200554	0.649598347	0.769445588	0.759005911	0.356604306	0.375785567	0.378708467	0.623921797	0.527194351	0.550288234	0.400472968	0.818282398	0.507894305	0.47220707	0.364466721	0.51207936	0.393740605	0.41436864	0.647312479	0.482067761	0.51793148	0.483641309	0.453278303	0.343468709	0.701494576	0.381284905	0.440968941	0.536979636	0.514741108	0.549306908
560	0.235794889	0.247298703	0.260094654	0.242685374	0.238739502	0.244170851	0.258674801	0.228773797	0.223621439	0.294109746	0.295015609	0.331247602	0.40850941	0.583832545	0.757720243	0.373161544	0.35578614	0.432821314	0.328050554	0.377438599	0.703473076	0.756631296	0.725164941	0.39296494	0.415264083	0.42055179	0.568806424	0.470504795	0.493376658	0.347087712	0.765954552	0.45030545	0.519379529	0.402113007	0.561259311	0.43427484	0.458468508	0.660385849	0.422242948	0.458269953	0.42367831	0.394746293	0.290750379	0.652132627	0.329190723	0.385687547	0.477916227	0.456872788	0.490383351
561	0.244357433	0.257492539	0.272230159	0.252165306	0.247608946	0.253887133	0.270669506	0.23626242	0.230276965	0.313653352	0.315800121	0.361579002	0.455277524	0.643441615	0.756949736	0.410033906	0.389715495	0.479622949	0.357411617	0.418749357	0.739321034	0.728210558	0.682708024	0.437844174	0.463380786	0.471540566	0.513267058	0.414599408	0.437025608	0.295851394	0.708467707	0.393802008	0.569746596	0.448671184	0.610258371	0.482352046	0.509773594	0.662655408	0.36392238	0.399745422	0.36521078	0.337977409	0.241761633	0.599903535	0.279450804	0.332010066	0.419890743	0.400093008	0.432382342
562	0.253911532	0.269074194	0.28626919	0.262859933	0.257547501	0.264852468	0.284556634	0.244443833	0.2374628	0.337401966	0.341409775	0.399300102	0.509867629	0.693337663	0.737401057	0.454734984	0.431382126	0.533414055	0.394088625	0.469632033	0.753353612	0.689622363	0.635055478	0.492292586	0.520681079	0.531697916	0.457923057	0.359996516	0.381731686	0.247931242	0.648648765	0.338918068	0.620080479	0.50542812	0.654622644	0.537760695	0.567095236	0.655281156	0.307970996	0.343022707	0.309106838	0.284020444	0.198191632	0.546247271	0.233316143	0.280851767	0.363325466	0.344889437	0.375702225
563	0.264689628	0.28239889	0.302725352	0.275071016	0.268813274	0.277374034	0.300859995	0.253446753	0.245266571	0.366598713	0.373377391	0.445947679	0.570358431	0.726162327	0.704903898	0.507934546	0.48197407	0.592248684	0.439869721	0.53060894	0.746944622	0.644810703	0.584419852	0.555880163	0.58575615	0.598596632	0.403288124	0.307446736	0.328155694	0.204841003	0.587992311	0.286521388	0.665612226	0.572079962	0.689396475	0.598332056	0.626895593	0.639999451	0.255682221	0.289077667	0.256659252	0.234359141	0.161646796	0.49207655	0.192343453	0.233540992	0.308918258	0.292068632	0.320969518
564	0.27700237	0.297940985	0.322269141	0.289201623	0.2817519	0.2918612	0.320274421	0.263435146	0.253797666	0.402725866	0.413576711	0.502398542	0.631847077	0.73853979	0.664133589	0.568598813	0.541442564	0.651260044	0.496111735	0.599455546	0.724866115	0.596259284	0.532165928	0.624846708	0.653389721	0.665675502	0.349963958	0.258092645	0.277300792	0.168125669	0.527281045	0.237950006	0.700884904	0.644459777	0.710665626	0.65869128	0.682568657	0.618637003	0.208793851	0.239326401	0.209604665	0.1907947	0.132952025	0.438032597	0.157979633	0.191723955	0.257823397	0.242908205	0.269227162
565	0.291256523	0.31631302	0.345727867	0.305774894	0.296815349	0.308844066	0.343674431	0.274614992	0.263191077	0.447248169	0.463891216	0.567682533	0.686733346	0.7316386	0.618260833	0.632743367	0.607134674	0.702977783	0.562524102	0.669604194	0.692014003	0.545612524	0.479240071	0.691145439	0.714348521	0.722901261	0.298795382	0.213430367	0.230543647	0.138768239	0.467053908	0.194872252	0.721593745	0.713263837	0.716790124	0.710736415	0.725953599	0.592775039	0.169086558	0.195474143	0.169728196	0.154895956	0.111806693	0.384721486	0.130960904	0.156883525	0.211623452	0.199051752	0.221954093
566	0.307999598	0.338310001	0.374081068	0.32547943	0.314607991	0.329017909	0.372124525	0.287252981	0.273618594	0.500961615	0.525283091	0.636984898	0.726635268	0.709661219	0.569292406	0.69242077	0.672117199	0.739339488	0.634917331	0.729800851	0.652113289	0.493923779	0.426341179	0.743503008	0.757793994	0.760213672	0.25099341	0.175056826	0.18950569	0.116681692	0.407787456	0.158859278	0.726203174	0.765549546	0.708741847	0.746067144	0.75047464	0.563636442	0.137660717	0.159064054	0.138143762	0.127253293	0.096953991	0.332868511	0.11092411	0.129677486	0.172059605	0.162126104	0.180888836
567	0.327943976	0.364900887	0.408347068	0.349177508	0.335905736	0.353248148	0.406768497	0.30168747	0.285295573	0.56287528	0.596083378	0.701080627	0.746002088	0.677040412	0.518598992	0.737838596	0.726192956	0.755292648	0.704040212	0.768676394	0.60773642	0.441971343	0.37414387	0.772651795	0.776753698	0.77262579	0.208056223	0.144095691	0.155564361	0.100902846	0.350109844	0.130715549	0.715846157	0.79142752	0.688919387	0.759887749	0.753984057	0.532134794	0.114416689	0.130810965	0.114767073	0.107259022	0.086904338	0.283449472	0.096760997	0.109692279	0.140362434	0.133062458	0.147429477
568	0.352024089	0.3972039	0.449336525	0.377923103	0.361699849	0.382578928	0.448568514	0.318358191	0.298500109	0.628435906	0.669363588	0.748375698	0.744509886	0.637268502	0.467098778	0.761689668	0.759790031	0.751021056	0.757098772	0.780958508	0.560547174	0.390419208	0.323456083	0.776324162	0.771658468	0.762308092	0.171472296	0.120626097	0.129222454	0.090048017	0.295002283	0.110023763	0.693404305	0.789818318	0.660145217	0.753072817	0.73915794	0.498912854	0.098094312	0.110175047	0.098344756	0.093434307	0.080350156	0.237775376	0.087104063	0.095667998	0.116584512	0.111573774	0.121922653
569	0.381390582	0.436319662	0.497225293	0.412875883	0.393159944	0.418130844	0.497809935	0.337818249	0.31358341	0.689221698	0.733095183	0.770716811	0.725586414	0.592823558	0.415530734	0.762474904	0.768827605	0.73023915	0.784240482	0.769007	0.51169528	0.340004433	0.275329751	0.758527479	0.747767231	0.734996647	0.142177841	0.103777524	0.109952199	0.08283795	0.243884345	0.095543858	0.661976326	0.76650115	0.62489982	0.729918984	0.710596107	0.464460103	0.087069006	0.095814793	0.087249257	0.08420653	0.076291475	0.197343005	0.080757257	0.086181307	0.099721332	0.096480748	0.103598909
570	0.417382856	0.482951673	0.550769672	0.455093514	0.431534287	0.460860119	0.553184023	0.360768107	0.330999806	0.734831793	0.774464276	0.767711221	0.69404472	0.545349106	0.36461403	0.744269286	0.75616395	0.697775079	0.784138162	0.739704963	0.4619684	0.291678431	0.231111978	0.725886966	0.711372573	0.696523222	0.120077505	0.092149094	0.096460404	0.078273211	0.198569936	0.085767422	0.624214473	0.729150019	0.585120202	0.695482445	0.672719845	0.429170559	0.079872765	0.086165731	0.080004918	0.078279496	0.074021674	0.163461531	0.076811075	0.080004352	0.088221243	0.086261465	0.090977735
571	0.461295268	0.536775184	0.606702986	0.505072434	0.477818704	0.511076122	0.611077139	0.388042909	0.35131668	0.757856407	0.787180382	0.744528137	0.653956596	0.496023346	0.315210039	0.712675509	0.727636081	0.657600321	0.762201359	0.699385413	0.412029387	0.246654116	0.192262035	0.683851132	0.667192821	0.651080588	0.104234692	0.084396264	0.087345047	0.07560644	0.160773842	0.079400079	0.582167675	0.683424912	0.542284249	0.653737457	0.62883649	0.39341389	0.075387191	0.079909884	0.075486471	0.07468893	0.073025037	0.136758601	0.074588313	0.07619865	0.08064133	0.079582654	0.08257934
572	0.513782378	0.595303995	0.65927129	0.561791678	0.531996971	0.56748256	0.665104566	0.420580408	0.375242434	0.757531952	0.774372286	0.707839537	0.608223941	0.445718878	0.268442227	0.672432233	0.688792161	0.612485231	0.725869927	0.652323809	0.362559518	0.206349417	0.15995961	0.635993657	0.618232801	0.601332054	0.093295888	0.079450484	0.081418425	0.074309746	0.13134255	0.07547801	0.537299132	0.632744023	0.497461444	0.607376057	0.581166944	0.357574731	0.072830618	0.076078287	0.072907328	0.072765029	0.072943123	0.116856627	0.073611056	0.074097787	0.07586885	0.075442411	0.077217435
573	0.573836858	0.653265655	0.7015067	0.621745412	0.592005962	0.626321502	0.707702475	0.459258212	0.403601546	0.738084288	0.743481581	0.662739702	0.558896503	0.395228377	0.225675911	0.626827853	0.643544789	0.564344941	0.680777284	0.60126427	0.314394821	0.172074028	0.134669698	0.584660833	0.56647958	0.54906664	0.085997195	0.076513211	0.077777054	0.073995204	0.109884644	0.073295761	0.490684198	0.57928504	0.451476188	0.558241223	0.531249539	0.322092716	0.071639579	0.073965732	0.071700613	0.072023405	0.073513733	0.102699796	0.07352765	0.073214191	0.07308784	0.073106983	0.074012872
574	0.637130838	0.70278937	0.72755532	0.678114416	0.652376739	0.68078009	0.73286433	0.504513345	0.437266881	0.705432912	0.701479482	0.61247649	0.507378418	0.345408797	0.188345524	0.577971314	0.594381584	0.514437828	0.63041591	0.547910283	0.268630716	0.144566869	0.115915891	0.531341247	0.513199247	0.49545495	0.081341131	0.075020517	0.075778401	0.074389514	0.09499026	0.072361324	0.443115508	0.524391373	0.405003972	0.507537436	0.480119599	0.287506273	0.07142502	0.073082565	0.07147504	0.072128338	0.074552684	0.092982877	0.074089892	0.073206438	0.071730897	0.07206495	0.07235131
575	0.69548321	0.736105673	0.734981279	0.722249324	0.704588213	0.72264797	0.738533438	0.555679344	0.476936219	0.66433064	0.652900016	0.559149161	0.454730144	0.297306863	0.157539143	0.527272716	0.542950928	0.463655753	0.576988013	0.493415914	0.226605752	0.123714082	0.102614655	0.47706987	0.459289494	0.441373866	0.078589272	0.074564661	0.074958024	0.075293433	0.085022565	0.072320335	0.395274821	0.46898168	0.358712626	0.45612487	0.428569964	0.254470049	0.071907382	0.073076874	0.071949536	0.07283773	0.075926039	0.086549809	0.075116566	0.073826955	0.071391254	0.071948415	0.071792052
576	0.738827815	0.748820481	0.725068432	0.747018502	0.739778127	0.745503303	0.726593939	0.610100056	0.522693151	0.617983161	0.60050011	0.504169043	0.401863201	0.252214367	0.133591027	0.475689101	0.49036218	0.412702504	0.521928113	0.438629205	0.189728103	0.10866265	0.093520948	0.422652857	0.405488375	0.387607953	0.077205822	0.074851994	0.074981843	0.076562378	0.078582277	0.072918026	0.347863472	0.413777474	0.313376044	0.404700753	0.377322666	0.223736959	0.072885764	0.073695972	0.072922178	0.073977166	0.077537092	0.082497928	0.076476078	0.074896725	0.071777756	0.072493203	0.072019675
577	0.759879205	0.741637764	0.701422794	0.750207929	0.752978905	0.747658884	0.701100814	0.662377926	0.573197576	0.568398394	0.545946812	0.448540579	0.34971946	0.211609238	0.115930534	0.423916381	0.437399732	0.362260514	0.466193296	0.384305135	0.159087051	0.098204078	0.087539686	0.36887025	0.352566757	0.335036188	0.076813691	0.075676103	0.075615429	0.078094382	0.074645961	0.07397545	0.30173685	0.359511196	0.269981679	0.353969779	0.327196447	0.19607795	0.074219132	0.074762484	0.074251255	0.075424114	0.07931821	0.080173025	0.078075631	0.076289653	0.072686638	0.073513944	0.072813555
578	0.757447102	0.718445471	0.667827469	0.734320333	0.744778997	0.731690289	0.66601898	0.705334625	0.624983152	0.516934496	0.490381474	0.393160062	0.29942385	0.176863277	0.103471289	0.372613973	0.384773314	0.313157918	0.410579245	0.331316825	0.135069354	0.091197006	0.083818155	0.316666278	0.301500952	0.284779595	0.077135417	0.076884951	0.076686263	0.079814649	0.072478501	0.075360942	0.257987522	0.307116722	0.229740244	0.304807598	0.279242772	0.172133713	0.075803896	0.076145942	0.075832702	0.077088691	0.08122026	0.079092362	0.079847226	0.077913133	0.07396813	0.074874285	0.074011576
579	0.735747565	0.683969771	0.627387868	0.704296761	0.719766082	0.702277138	0.624454585	0.732318383	0.672197635	0.464522665	0.434633618	0.33899744	0.252367158	0.148829687	0.094995681	0.322561817	0.333283846	0.266490471	0.355909348	0.280802388	0.1172256	0.086713571	0.08172964	0.267278268	0.253584933	0.23827199	0.077972248	0.07836983	0.078070969	0.081670243	0.071567802	0.076980604	0.217947349	0.257860126	0.193978575	0.258375002	0.234811781	0.152264717	0.07756644	0.07775341	0.077592576	0.078907189	0.083208944	0.078910136	0.081742837	0.079701445	0.07551538	0.076476974	0.075498036
580	0.700726851	0.641991182	0.5823241	0.664774711	0.683228916	0.663750643	0.578566326	0.740214806	0.707932898	0.411916035	0.379477891	0.287276731	0.210145985	0.127484325	0.089462783	0.274818477	0.283994928	0.223657352	0.303236658	0.234240679	0.104530802	0.084065915	0.080823236	0.222262147	0.210405057	0.197140737	0.07918159	0.080053286	0.079681516	0.08362407	0.071555083	0.078767819	0.182989682	0.213343245	0.163814612	0.21612384	0.195436772	0.136457711	0.079454835	0.079519217	0.079478724	0.080834845	0.08526066	0.079378617	0.083728913	0.081608337	0.077252428	0.078252972	0.077190593
581	0.65724983	0.595181008	0.534242174	0.619154605	0.639288924	0.619302415	0.529895264	0.729990162	0.726860019	0.359895394	0.325836268	0.239522765	0.174245895	0.11205872	0.086063923	0.230747929	0.238282385	0.186159591	0.253939185	0.193281283	0.095834591	0.082743245	0.080767236	0.183247204	0.173523273	0.162798993	0.080658732	0.081879038	0.08145379	0.085649735	0.072180638	0.080674429	0.154146202	0.175199577	0.139800367	0.179547008	0.162451866	0.124394883	0.08143186	0.081396307	0.081453759	0.082839732	0.087358999	0.080315735	0.085781686	0.083600703	0.079124211	0.08015234	0.079029465
582	0.608534726	0.545314006	0.484293326	0.569676239	0.590679369	0.571058246	0.479539987	0.705437685	0.727334405	0.309432367	0.274936068	0.197449257	0.145555195	0.10136746	0.084210302	0.191892797	0.197739982	0.155191821	0.209695106	0.159327369	0.090111996	0.082380878	0.081326161	0.151454641	0.143951387	0.135906254	0.082329592	0.083807909	0.083342999	0.087729435	0.073262198	0.082667146	0.131718945	0.144547535	0.121712664	0.14972763	0.13649576	0.115553187	0.083472166	0.083352778	0.08349222	0.08490028	0.089493313	0.081592143	0.087885229	0.085655997	0.081092501	0.082140514	0.080973042
583	0.556615868	0.493635846	0.43339882	0.517854656	0.539192412	0.520466442	0.428389226	0.670749813	0.711360996	0.261802392	0.228346547	0.162513951	0.123997812	0.094243377	0.083473474	0.159545824	0.16377181	0.13115803	0.172132615	0.132953893	0.08656715	0.082713789	0.082329254	0.127168154	0.121700212	0.116087384	0.084140927	0.085812303	0.085317444	0.089851131	0.074668225	0.084722697	0.115207592	0.121472467	0.108732955	0.126883395	0.117252919	0.109353117	0.085558454	0.085367048	0.08557672	0.087001927	0.091656827	0.083114111	0.09002888	0.087758754	0.083130434	0.084193302	0.082991988
584	0.50286759	0.44109988	0.382419802	0.464790724	0.486082216	0.468574881	0.37729367	0.629260864	0.682745235	0.218551905	0.187767426	0.135338952	0.108640706	0.089731414	0.083543357	0.134240778	0.137050901	0.113537995	0.142236291	0.113668941	0.084608307	0.083550539	0.083653638	0.109652118	0.10584563	0.102194221	0.086055098	0.087873249	0.087355189	0.092007047	0.076304532	0.086825235	0.103602954	0.105049362	0.099809556	0.110326249	0.103683107	0.105247156	0.087679409	0.087425167	0.087695877	0.089135324	0.093845636	0.08481452	0.092205865	0.089898735	0.08521958	0.086294202	0.085066082
585	0.448315805	0.388562808	0.332307905	0.411395588	0.432325975	0.416239706	0.327214916	0.583328588	0.645279816	0.181232474	0.154535182	0.115484633	0.098170332	0.087104705	0.084194979	0.115582556	0.117277961	0.10122284	0.119944091	0.100254289	0.083798128	0.084752334	0.085210757	0.097593606	0.095031936	0.092842462	0.088045704	0.089977953	0.089441293	0.094192449	0.078103685	0.088964204	0.095781625	0.093867482	0.093944031	0.098863615	0.094505223	0.102758652	0.089827987	0.089518493	0.089842591	0.091294832	0.096057892	0.086645424	0.094412189	0.092069427	0.087347533	0.088432197	0.087181617
586	0.393850033	0.336957813	0.284229775	0.358577798	0.378821435	0.364302825	0.27934369	0.534536435	0.60190267	0.150926532	0.129059894	0.10169219	0.091309437	0.085836983	0.085267967	0.102470123	0.103361154	0.092946791	0.104207348	0.091276134	0.083820714	0.086220229	0.086938048	0.089598602	0.087929621	0.086793034	0.090094844	0.09211826	0.091566076	0.096404889	0.080018495	0.091133023	0.090754559	0.086529746	0.090323268	0.091229874	0.088550265	0.101498004	0.0920003	0.091642148	0.09201293	0.093477555	0.098293292	0.088573415	0.096645949	0.094267104	0.089506412	0.090600388	0.089329776
587	0.340432671	0.287440601	0.239605013	0.307417228	0.326579442	0.313761588	0.235120349	0.484014925	0.554651524	0.12781938	0.110675916	0.092481415	0.08704317	0.08554511	0.086645793	0.093605809	0.093946989	0.087620648	0.093553689	0.085501434	0.084444617	0.087882405	0.088790605	0.084523809	0.083487212	0.083103575	0.092190336	0.094289127	0.093723387	0.098643464	0.082015524	0.093327778	0.087755777	0.081934169	0.088331947	0.086374975	0.084913619	0.101156809	0.094194517	0.093793541	0.09420502	0.095682371	0.100552568	0.090574929	0.098906675	0.09648992	0.091691367	0.09279464	0.091505025
588	0.289257964	0.241453409	0.199989869	0.259273614	0.276861672	0.265883064	0.196092299	0.432649007	0.504945325	0.111155794	0.098017904	0.08656921	0.084629937	0.085952556	0.088244839	0.087848108	0.087820878	0.084418853	0.08659988	0.08200986	0.085502376	0.089687502	0.090736753	0.081530895	0.080942707	0.081098002	0.094324235	0.096487804	0.095909673	0.100908436	0.084071648	0.095546536	0.086220436	0.079288316	0.087517148	0.083516461	0.082937718	0.10149835	0.09641026	0.095971609	0.096418447	0.097909412	0.102837214	0.092633736	0.10119498	0.098737438	0.093899804	0.095012873	0.09370427
589	0.241840296	0.200615462	0.166713467	0.21576376	0.231225228	0.222210082	0.163525621	0.381255346	0.453841191	0.099644956	0.089617243	0.083006333	0.083544008	0.086863178	0.09000621	0.084333876	0.084060654	0.082748399	0.082286635	0.080152325	0.086874923	0.091599554	0.092754698	0.080029268	0.079759017	0.080299197	0.096491715	0.098713232	0.098123294	0.103200955	0.086171443	0.097788846	0.085741483	0.078037679	0.087552123	0.08209537	0.082154865	0.102346527	0.098648183	0.098176333	0.098653832	0.100159698	0.1051493	0.094739055	0.103512324	0.101010285	0.096130807	0.097254541	0.095926225
590	0.199870154	0.16633625	0.140427066	0.178461908	0.191317817	0.184313836	0.137967618	0.330756788	0.402261794	0.091991725	0.0842694	0.08110858	0.083401367	0.08813398	0.091887246	0.082429022	0.081991632	0.082173919	0.079847087	0.079457644	0.088475198	0.093592714	0.09482908	0.079588929	0.079544199	0.080358631	0.098689956	0.100965445	0.10036384	0.105522779	0.088304479	0.100055235	0.086018727	0.077779018	0.088196107	0.081701707	0.08222229	0.103569018	0.100909588	0.10040835	0.100912444	0.102434812	0.107491293	0.096883633	0.105860765	0.103309814	0.098384557	0.09952011	0.098170786
591	0.164822716	0.139325392	0.120866173	0.148412819	0.158445304	0.15334905	0.11905272	0.282313749	0.351148439	0.087126563	0.081089123	0.080394466	0.083929431	0.089663743	0.093858066	0.081679906	0.081133481	0.082383918	0.078741964	0.079591429	0.090241453	0.095649091	0.096949575	0.079904469	0.080019713	0.081028925	0.100917708	0.103245343	0.10263187	0.107876191	0.090464212	0.102347017	0.086837599	0.078226408	0.08927727	0.082042604	0.082896056	0.105069614	0.10319629	0.102668837	0.103196066	0.104736786	0.109866018	0.099062972	0.108242883	0.105637979	0.100662109	0.101810859	0.100438789
592	0.137415142	0.119317904	0.107038387	0.12571496	0.133073782	0.129610373	0.10573374	0.237374532	0.301617351	0.084259268	0.079451778	0.080520664	0.0849339	0.091380532	0.095897788	0.081759388	0.081141079	0.083154468	0.078587007	0.080314386	0.092129838	0.097756407	0.099109403	0.080757491	0.080986442	0.0821336	0.103174839	0.105554461	0.104928647	0.110263895	0.092646789	0.104666091	0.088044444	0.079175627	0.090672744	0.082907881	0.084001881	0.106778583	0.105510494	0.104959406	0.105506871	0.107068013	0.11227661	0.101274524	0.110661696	0.107997208	0.10296516	0.104128668	0.102731745
593	0.11730656	0.105263292	0.097673861	0.109530011	0.114655072	0.112448177	0.096738656	0.197542687	0.255051463	0.082822256	0.07891195	0.081241106	0.086276411	0.093233356	0.097992	0.082430938	0.081765416	0.084324851	0.079105885	0.081455318	0.094109413	0.099906434	0.101304337	0.081991893	0.082302081	0.08354675	0.105462047	0.107894835	0.107255977	0.112688977	0.09485027	0.107014821	0.089529428	0.080480752	0.092294829	0.08414691	0.085415335	0.108645687	0.107854733	0.107282041	0.107847356	0.109431191	0.114726516	0.10351716	0.113120624	0.110390328	0.105295901	0.106475893	0.105051691
594	0.103313625	0.095796602	0.091590281	0.09850373	0.101933682	0.100614014	0.090912526	0.164204313	0.213050987	0.082411152	0.079153915	0.08238289	0.087860168	0.09518688	0.10013114	0.083526837	0.082830296	0.085781842	0.080103578	0.082893913	0.096158928	0.102094	0.103532091	0.083498014	0.083866655	0.085180065	0.107780702	0.110268934	0.109616128	0.115154894	0.09707414	0.109395979	0.091215512	0.082039224	0.094082159	0.085653685	0.087049148	0.11063557	0.110231844	0.109639086	0.110220322	0.111829316	0.117219509	0.105790852	0.115623487	0.112820543	0.107656946	0.108855304	0.107401094
595	0.093965288	0.089669647	0.087863891	0.091276716	0.093488353	0.09276564	0.087363434	0.138028692	0.177145901	0.082735444	0.079952781	0.083824195	0.089617199	0.097216683	0.102309063	0.084927904	0.084210797	0.087445433	0.081442159	0.084545239	0.098263938	0.104316105	0.105791776	0.08519849	0.085609652	0.086971408	0.110132706	0.112679605	0.112011762	0.117665473	0.099318878	0.11181269	0.093048607	0.083778628	0.095991805	0.087353369	0.088841951	0.112723497	0.112644955	0.112033228	0.112628857	0.114265685	0.119759718	0.108096396	0.118174514	0.115291415	0.110051267	0.111270031	0.10978279
596	0.087959043	0.085926769	0.085826139	0.086762434	0.088112595	0.087787148	0.085447592	0.118705218	0.148311873	0.083585943	0.081148112	0.085478752	0.091499681	0.099305999	0.104522047	0.086549076	0.085817943	0.089258935	0.083023603	0.086349125	0.10041479	0.106571322	0.108083533	0.087038596	0.087481256	0.088877016	0.112520407	0.115130055	0.114445906	0.120224936	0.101585679	0.114268422	0.094990747	0.085647741	0.097993801	0.089193012	0.090750563	0.11489232	0.115097495	0.114467502	0.115076343	0.116743905	0.122351668	0.110435229	0.120778369	0.117806869	0.112482169	0.113723546	0.112199944
597	0.084321057	0.083885616	0.084998545	0.084177743	0.08491716	0.084858052	0.08470349	0.105158313	0.126585203	0.084812684	0.082625659	0.087285571	0.093474196	0.101443529	0.106768139	0.088329731	0.087588451	0.091182389	0.0847783	0.088263167	0.102605285	0.108859391	0.110408296	0.088979865	0.089446529	0.090866322	0.114946559	0.11762385	0.116921943	0.122837932	0.103876273	0.116766986	0.097015508	0.087610593	0.100067451	0.091135366	0.09274484	0.117130382	0.117593213	0.116945298	0.117566479	0.119267923	0.125000333	0.112809317	0.123440199	0.120371217	0.114953285	0.116219669	0.114656044
598	0.082366376	0.083061207	0.085035936	0.082969845	0.083274947	0.083395436	0.084797634	0.096045563	0.111106613	0.08630889	0.084304452	0.08920195	0.095517742	0.103621939	0.109046701	0.090227049	0.089477701	0.093187979	0.086657237	0.090257867	0.104831743	0.111180951	0.112767633	0.090995637	0.091481334	0.092918313	0.117414299	0.120164933	0.119443624	0.125509593	0.106192816	0.119312561	0.099104802	0.089642314	0.102198754	0.093154579	0.09480407	0.119430056	0.12013621	0.119470382	0.120103307	0.121842067	0.127711205	0.115221081	0.126165695	0.1229892	0.117468596	0.118762585	0.117154912
599	0.081612661	0.08310551	0.085690062	0.082744468	0.082741411	0.08298281	0.085490031	0.090166233	0.100564273	0.087999063	0.086127536	0.091198404	0.097614797	0.105836757	0.111358089	0.092211178	0.091454634	0.095256671	0.088626342	0.092313059	0.107092328	0.113537343	0.115163638	0.093067779	0.093569326	0.095018861	0.11992715	0.122757661	0.1220151	0.128245602	0.108537817	0.121909734	0.101246544	0.091726052	0.104378531	0.095233028	0.096914333	0.121786677	0.122730983	0.12204693	0.12269126	0.124471094	0.130490383	0.11767336	0.128961175	0.125666047	0.120032457	0.121356889	0.119700735
600	0.081713623	0.08376794	0.086783477	0.083217754	0.0829967	0.083319275	0.086609046	0.086605199	0.093676246	0.089829834	0.088054939	0.093254717	0.099755051	0.108085519	0.113703392	0.094261463	0.093497785	0.097375602	0.090662093	0.094415119	0.109386521	0.115930461	0.117598846	0.095184125	0.095699617	0.097158642	0.122489021	0.125406833	0.124640942	0.131052265	0.110914085	0.124563537	0.10343284	0.093850573	0.106600968	0.097358863	0.099066447	0.124197693	0.125382467	0.12467955	0.125335199	0.12716024	0.133344651	0.120169377	0.131833667	0.128407528	0.122649637	0.124007619	0.122298089
601	0.082418704	0.084868104	0.088189103	0.08418501	0.083809667	0.084187093	0.088031705	0.084698576	0.089411913	0.091763283	0.090058539	0.095357123	0.101931854	0.110367243	0.116084313	0.096363665	0.095592366	0.099536234	0.092748302	0.096554978	0.111714811	0.118362691	0.120076217	0.097336669	0.097865131	0.099331698	0.125104264	0.128117775	0.127326219	0.133936645	0.11332472	0.127279535	0.105658804	0.096008561	0.108862704	0.099524287	0.101254573	0.126662273	0.12809613	0.127373383	0.128040508	0.12991533	0.136281651	0.122712767	0.134791072	0.131220075	0.125325388	0.126720343	0.124952012
602	0.083550174	0.086278595	0.089817461	0.085501585	0.085016585	0.085431628	0.089671295	0.083970462	0.087011862	0.093773085	0.092119069	0.097496569	0.104141186	0.112681992	0.118503011	0.098508325	0.097728546	0.101733202	0.094874207	0.098726907	0.114078416	0.120836814	0.122599078	0.099520452	0.100061579	0.101534515	0.12777766	0.130896357	0.130076508	0.136906605	0.115773093	0.130063849	0.107921692	0.098195567	0.111162107	0.101724464	0.103475287	0.129180731	0.130877992	0.130134098	0.13081311	0.132742794	0.139309925	0.125307538	0.137842206	0.13411081	0.128065473	0.129501189	0.127668025
603	0.084983421	0.087910172	0.091606016	0.087066217	0.086502758	0.086944256	0.091467144	0.084081415	0.085936836	0.095841284	0.094223647	0.099667428	0.106380995	0.115030689	0.120962093	0.100689465	0.099900091	0.103963491	0.09703297	0.100927622	0.116479192	0.123356028	0.125171166	0.101732746	0.102286725	0.103765395	0.130514526	0.133749135	0.132898032	0.13997105	0.118262881	0.132923313	0.110220423	0.100409247	0.113498918	0.103956759	0.105726979	0.131754458	0.133734787	0.132968048	0.13365963	0.135649857	0.142439211	0.127958157	0.140997094	0.137087757	0.130876301	0.132356989	0.130452259
604	0.08663128	0.08970043	0.093511236	0.088808127	0.088188004	0.088648827	0.093376971	0.084789042	0.085804196	0.097955861	0.096363897	0.101866477	0.108650614	0.1174149	0.123464565	0.102903588	0.102103324	0.106225766	0.099220521	0.103155569	0.11891951	0.125923933	0.127796639	0.103972408	0.104539796	0.10602393	0.133320778	0.136683457	0.135797745	0.1431401	0.120798087	0.13586558	0.112555116	0.102648748	0.115873893	0.106220109	0.108009338	0.134385704	0.136674072	0.135882364	0.136587495	0.138644661	0.145680653	0.130669576	0.144267166	0.140159981	0.133765017	0.135295394	0.133311539
605	0.088433031	0.091606028	0.095503127	0.090678116	0.090016521	0.090492242	0.095371631	0.085921859	0.086342763	0.100109024	0.098534646	0.104092195	0.110950387	0.119836707	0.126013819	0.105148983	0.104336391	0.108519914	0.10143475	0.105410431	0.12140219	0.128544545	0.130480117	0.106239433	0.106821075	0.108310644	0.136203029	0.139707609	0.138783472	0.146425357	0.123383081	0.138899286	0.114926793	0.104914288	0.118288559	0.108514594	0.110322999	0.137077446	0.139704396	0.138885102	0.139605106	0.141736456	0.149047128	0.133447306	0.147665575	0.143337814	0.136739656	0.138325033	0.136253529
606	0.090347003	0.093597446	0.097561522	0.092642582	0.09195009	0.092438097	0.097431514	0.087360722	0.087362948	0.102296061	0.100733042	0.106344314	0.113281428	0.12229865	0.128613657	0.107425278	0.106598805	0.110846768	0.10367499	0.107692824	0.123930487	0.131222349	0.133226755	0.108534677	0.109131655	0.110626787	0.139168751	0.142831063	0.141864131	0.149840337	0.126022676	0.142034312	0.11733721	0.107206898	0.120745103	0.110841177	0.112669347	0.139833373	0.142835563	0.141985481	0.142722094	0.14493591	0.152553781	0.136297528	0.151207707	0.14663321	0.139809365	0.141455772	0.139286934
607	0.092341255	0.09565219	0.099671162	0.094675862	0.093959449	0.094458547	0.099541798	0.089013632	0.088718077	0.104513773	0.102957383	0.108623184	0.115645254	0.124803553	0.131268195	0.109732766	0.108890748	0.113207639	0.105941285	0.110003837	0.126507958	0.133962204	0.136042146	0.110859438	0.111473049	0.112973989	0.142226138	0.146064287	0.145049562	0.153400158	0.128722062	0.145281596	0.119788524	0.109528031	0.123246082	0.11320128	0.115050162	0.142657605	0.146078442	0.145193689	0.145949126	0.148254883	0.156217657	0.139226976	0.15491082	0.150059493	0.142984245	0.14469853	0.142421355
608	0.094393844	0.097755016	0.101821938	0.096760474	0.096024563	0.09653452	0.101692665	0.090815969	0.090304693	0.106760613	0.105207213	0.110929854	0.118043864	0.127354605	0.133981962	0.112072512	0.111213178	0.115604426	0.108234478	0.112345111	0.129138555	0.136769462	0.138932472	0.113215532	0.113847269	0.115354328	0.145384379	0.149419163	0.148350896	0.157122297	0.131486926	0.148653567	0.122283401	0.111879629	0.125794536	0.115596873	0.117467704	0.145554897	0.149445415	0.148521297	0.149298357	0.151706961	0.160058651	0.142243149	0.158794935	0.153631968	0.146275715	0.148065702	0.145667632
609	0.096492171	0.099897464	0.104008579	0.098886586	0.09813401	0.098655146	0.103878994	0.092728525	0.092059732	0.109036626	0.107483281	0.11326609	0.120479794	0.129955467	0.136760076	0.114446392	0.113567855	0.118039676	0.11055621	0.114718871	0.131826768	0.139650203	0.141904786	0.115605336	0.116256876	0.117770393	0.148654168	0.152909723	0.151781236	0.161027896	0.134323678	0.152164927	0.124825118	0.114264164	0.128394112	0.118030543	0.119924791	0.148530863	0.152951193	0.151981985	0.152784216	0.15530839	0.164101151	0.145354673	0.16288437	0.157368996	0.149697211	0.151571941	0.149038485
610	0.098627877	0.102074139	0.106227988	0.101047823	0.100280269	0.100813296	0.106097789	0.094723703	0.093938557	0.11134262	0.109786916	0.115634028	0.122955916	0.132610191	0.13960822	0.116856732	0.11595697	0.12051634	0.112908536	0.117127686	0.134577576	0.142611221	0.144967019	0.118031564	0.118704777	0.120225096	0.152047785	0.15655232	0.155355798	0.165142149	0.137239483	0.155832839	0.127417389	0.116684436	0.13104891	0.120505266	0.122424606	0.151591866	0.156613016	0.155591698	0.156423607	0.159078329	0.168374599	0.14857135	0.167208221	0.161292294	0.153264324	0.155234332	0.152548652
611	0.100795731	0.104281915	0.10847868	0.103240351	0.102458688	0.103004618	0.108347635	0.096782674	0.095910298	0.113679996	0.112119914	0.118036144	0.125475451	0.135323286	0.142532801	0.119306265	0.118383107	0.123037774	0.115293875	0.11957446	0.137396556	0.145660237	0.148128262	0.120497267	0.121194232	0.122721687	0.155579671	0.160366537	0.15909273	0.169496076	0.140242506	0.159677907	0.130064404	0.119143575	0.133763554	0.123024408	0.124970723	0.154745161	0.160451682	0.159369537	0.160236916	0.163040082	0.172915856	0.151904551	0.171802466	0.165428357	0.15699565	0.159073357	0.156215662
612	0.102992399	0.106519068	0.110760192	0.105461901	0.104666369	0.10522646	0.110628118	0.098891887	0.097952346	0.116050592	0.114484421	0.120475202	0.128041957	0.138099759	0.145541041	0.121798091	0.12084919	0.125607731	0.117714952	0.122062408	0.140289952	0.148806057	0.151398984	0.123005819	0.123728848	0.125263755	0.159266975	0.164376153	0.16301396	0.174128689	0.143342081	0.163725192	0.132770851	0.121645031	0.136543218	0.125591724	0.127567114	0.157999023	0.164492698	0.163338699	0.164249132	0.167222526	0.177772381	0.155367564	0.176712556	0.169810095	0.160913599	0.163113881	0.160060593
613	0.105215398	0.108784494	0.113072509	0.107710898	0.106901193	0.107476922	0.112939263	0.101040147	0.1000458	0.11845642	0.116882722	0.122954071	0.130659107	0.140944771	0.148640415	0.124335435	0.123358262	0.128230091	0.120174601	0.124594851	0.143264212	0.152057807	0.15479006	0.125560701	0.126312345	0.127854993	0.16312763	0.168606145	0.167142503	0.179081235	0.146547892	0.168001034	0.135541577	0.124192361	0.139393256	0.128211092	0.130217874	0.161362037	0.168762905	0.167523557	0.168486551	0.171656113	0.182994555	0.158974237	0.18198659	0.174472231	0.165041686	0.167382026	0.164105543
614	0.107465024	0.111079163	0.115417173	0.109988066	0.109163611	0.109756602	0.115282621	0.103223974	0.102183865	0.12090027	0.119317765	0.125476262	0.133331393	0.143864755	0.151840565	0.12692233	0.125914114	0.130909678	0.122676314	0.127175841	0.146327524	0.155427504	0.158316084	0.12816616	0.128949279	0.130499915	0.16718712	0.173093464	0.17151212	0.18441865	0.149872789	0.172544501	0.138382676	0.126789893	0.142320427	0.130887318	0.132928075	0.164845431	0.173302781	0.17196022	0.172988807	0.176387667	0.188665242	0.16274367	0.187700799	0.179468249	0.169414213	0.171916387	0.1683826
615	0.109740111	0.113402964	0.117794921	0.112292928	0.111452727	0.112064791	0.117658952	0.105435821	0.104353362	0.123384551	0.121792178	0.128044987	0.136062931	0.146865572	0.155150164	0.129562433	0.128520185	0.133650884	0.125223274	0.129809093	0.149487297	0.158925877	0.161990002	0.130826089	0.131643823	0.133202658	0.171467618	0.177869852	0.17615189	0.19019568	0.153328219	0.177389122	0.141299678	0.129441602	0.145330856	0.133624783	0.135702342	0.16845925	0.178146897	0.176679696	0.177789756	0.181456946	0.194853469	0.166692645	0.193919317	0.184843527	0.174060771	0.176750121	0.172919485
616	0.112042689	0.115758229	0.120208386	0.114627687	0.113770615	0.114403686	0.120070879	0.107676754	0.106554568	0.125912745	0.124309524	0.130664415	0.138859115	0.149955121	0.15858145	0.132260618	0.131181037	0.136459566	0.127819638	0.132499441	0.152753762	0.162568457	0.165831002	0.133545565	0.13440145	0.135968633	0.176004356	0.182988175	0.181109797	0.1965101	0.156930906	0.182590875	0.144300098	0.132152658	0.148432934	0.136429312	0.138546834	0.172217891	0.18335418	0.181733756	0.182947078	0.186933253	0.20168873	0.170846893	0.200757404	0.190677166	0.179029793	0.181938317	0.177761332
617	0.114374511	0.118147133	0.122660139	0.116994349	0.116119112	0.116775273	0.122520963	0.109946943	0.108786297	0.128488426	0.126873468	0.133338878	0.141725599	0.153141801	0.162147653	0.135021981	0.133901423	0.13934189	0.130469715	0.135251939	0.156137886	0.166372181	0.169860202	0.1363299	0.137227907	0.138803517	0.180837193	0.188509435	0.186441009	0.203478344	0.160699125	0.188214313	0.147391925	0.134928476	0.151635607	0.139307035	0.141468046	0.176137007	0.188993378	0.187182254	0.188528062	0.192898315	0.209329192	0.175235106	0.208352597	0.197062238	0.184376603	0.187544327	0.18295958
618	0.116737705	0.120572223	0.125153127	0.119395288	0.118500423	0.119181936	0.125012144	0.112247306	0.111048436	0.1311156	0.12948809	0.136073238	0.144668839	0.156435429	0.165864734	0.13785231	0.136686722	0.142304946	0.133178336	0.138072312	0.159652697	0.170357842	0.174103951	0.139185127	0.140129755	0.141713789	0.186018286	0.194516062	0.192219651	0.211265539	0.164655389	0.194346583	0.150584512	0.137775216	0.154949422	0.142264993	0.144473476	0.180235681	0.195159079	0.193106345	0.194625278	0.199466455	0.218007726	0.179893922	0.21690046	0.204128398	0.190174749	0.193653296	0.188582372
619	0.119134331	0.123036055	0.127690375	0.121832857	0.120916708	0.121626036	0.127547436	0.114578391	0.113340225	0.133798502	0.132157708	0.138872699	0.147695833	0.159846868	0.169750821	0.140757852	0.139542716	0.145356466	0.135950663	0.140966735	0.163312794	0.174549386	0.178593028	0.14211777	0.143114123	0.144706481	0.191611145	0.201111326	0.198538145	0.220087744	0.168825677	0.201096647	0.153888215	0.140699553	0.158386123	0.145310868	0.147571338	0.184535783	0.201971861	0.199608133	0.201356732	0.20678566	0.22803996	0.184867011	0.226657314	0.212042533	0.196514856	0.200371203	0.194713401
620	0.121566804	0.125541534	0.130275265	0.124309755	0.123370478	0.124110302	0.130130209	0.116941454	0.115661932	0.136541809	0.134887082	0.141743049	0.150814497	0.163388704	0.173827635	0.143745623	0.14247588	0.148505262	0.138792429	0.143942145	0.167135367	0.178976038	0.183365657	0.145135175	0.146189085	0.147789549	0.197698751	0.208434768	0.205520683	0.230251706	0.173241715	0.208611334	0.15731507	0.143709015	0.161959452	0.148453404	0.150771036	0.189063872	0.20959814	0.206826384	0.208885302	0.215063729	0.239891538	0.190209972	0.237987733	0.221037283	0.203516879	0.20784004	0.201463021
621	0.124037914	0.12809193	0.132911558	0.126829045	0.125864611	0.126637848	0.132764205	0.119338477	0.118014879	0.139350673	0.137681444	0.144690711	0.154033742	0.16707546	0.178121083	0.146823487	0.145493437	0.15176134	0.141709982	0.147006298	0.171140572	0.18367327	0.188469042	0.148245576	0.149363756	0.150971953	0.204388663	0.216673039	0.213332513	0.242186409	0.177941981	0.217086495	0.160879019	0.146812069	0.165685433	0.151702523	0.154083301	0.193852093	0.218265188	0.21494793	0.217433453	0.224588801	0.254235171	0.195993122	0.251402448	0.231432888	0.211338078	0.216248115	0.208975343
622	0.126550761	0.13069087	0.135603428	0.129394125	0.128402303	0.129212145	0.135453572	0.121771882	0.120400948	0.142230854	0.140546634	0.147722956	0.157363862	0.170924451	0.182663385	0.150000457	0.148603629	0.155136387	0.144710487	0.150168085	0.175352922	0.188686202	0.193964514	0.15145844	0.152648693	0.154264054	0.211829125	0.226093136	0.222208438	0.256536332	0.182975272	0.226801553	0.164596781	0.15001848	0.169583453	0.155069806	0.157520754	0.198941274	0.228306576	0.224242439	0.227327759	0.235790345	0.272111978	0.202310541	0.267670818	0.24370288	0.220198182	0.225862123	0.217450708
623	0.129108684	0.133342281	0.138355426	0.132008664	0.130987002	0.131836945	0.138202833	0.12424431	0.122822233	0.145188729	0.143489119	0.150847954	0.160816669	0.174956198	0.187494424	0.153286797	0.15181579	0.158643975	0.147801974	0.15343761	0.179802066	0.194071948	0.199931388	0.154784561	0.156056052	0.157677742	0.22022312	0.237073642	0.232478937	0.274252136	0.188403094	0.238152583	0.168488321	0.153339435	0.173676877	0.158568686	0.161098158	0.204383138	0.240207635	0.235096076	0.239043458	0.249299268	0.295075889	0.209287389	0.287931396	0.258538729	0.230402705	0.237057285	0.227166076
624	0.131715308	0.136050454	0.141172554	0.134676661	0.133622459	0.134516345	0.14101695	0.126758687	0.12528113	0.14823142	0.146516116	0.154074975	0.164405871	0.179195399	0.192664483	0.156694319	0.155140605	0.162300087	0.150993519	0.156826495	0.184524467	0.199904198	0.206474221	0.158236392	0.159600005	0.161226828	0.229853603	0.250159565	0.244616019	0.296737443	0.194304487	0.251711427	0.172577888	0.156787908	0.177994357	0.162214963	0.164833043	0.210244532	0.25468574	0.248070692	0.253283148	0.26605015	0.325394207	0.217093296	0.31386776	0.276958101	0.242385761	0.250371348	0.238512308
625	0.134374583	0.138820092	0.144060341	0.137402492	0.136312765	0.137254828	0.143901402	0.129318237	0.127780328	0.151366948	0.149635755	0.157414661	0.16814761	0.183672297	0.198238224	0.160236809	0.15859046	0.166123842	0.154295493	0.160348272	0.1895658	0.206279937	0.213733589	0.161828492	0.163297315	0.164927581	0.24112165	0.266144455	0.259302016	0.326036183	0.200783244	0.268316154	0.176895479	0.160379159	0.182571712	0.166027511	0.168746576	0.216613579	0.27281582	0.26399495	0.271099885	0.287432203	0.366222118	0.225962399	0.347920275	0.300453369	0.25677749	0.266587011	0.252052033
626	0.137090815	0.141656369	0.147024927	0.140190952	0.139062394	0.140057315	0.146862265	0.131926478	0.13032278	0.154604417	0.152857257	0.160879339	0.172061122	0.188424484	0.204300122	0.163930525	0.162179865	0.170138421	0.157719851	0.164018878	0.194984164	0.213328735	0.221901117	0.165578064	0.167168056	0.168799392	0.254600553	0.286181985	0.277524641	0.364983117	0.207978252	0.289198459	0.181478754	0.164131357	0.187454402	0.170029186	0.172864678	0.223608116	0.296215651	0.284097178	0.294079217	0.315489338	0.421500962	0.236221573	0.393406273	0.331151818	0.27450495	0.286848508	0.268604887
627	0.139868717	0.144564999	0.150073166	0.143047318	0.141876249	0.142929224	0.149906308	0.134587243	0.132911707	0.157954244	0.156191167	0.164483449	0.176169628	0.193499366	0.210962072	0.167794882	0.165926015	0.174372306	0.161280511	0.1678573	0.200854512	0.221225804	0.231240674	0.169505693	0.171236577	0.172865672	0.271110811	0.31192316	0.300699519	0.417101665	0.216078742	0.316151215	0.186375662	0.168066417	0.192700954	0.174248038	0.17721955	0.231387585	0.327303961	0.310192582	0.3245938	0.353141996	0.494986287	0.248330145	0.454206681	0.37190718	0.296941072	0.312819203	0.289372777
628	0.142713462	0.147552316	0.15321275	0.145977423	0.144759729	0.145876536	0.153041113	0.137304703	0.135550606	0.161428434	0.159649632	0.168244057	0.180501449	0.198957347	0.218373442	0.171853283	0.169849479	0.178860856	0.164993807	0.171886384	0.207274417	0.230209345	0.242116574	0.173636249	0.175532713	0.177154978	0.291814596	0.345642751	0.330797815	0.4857722	0.225345997	0.351711054	0.191647823	0.172211045	0.198387424	0.178718854	0.181851612	0.240168923	0.369579607	0.344904834	0.366082979	0.404271163	0.587330948	0.262932209	0.533293025	0.426129116	0.326108861	0.346868971	0.316115473
629	0.145630748	0.150625381	0.156452372	0.148987738	0.147718796	0.148905894	0.15627522	0.140083407	0.138243276	0.165040951	0.163246767	0.172181554	0.18509154	0.204876246	0.226735346	0.176134263	0.173975139	0.183648446	0.168879118	0.176133941	0.214372161	0.240605247	0.255033529	0.178000131	0.180093435	0.181702554	0.318332491	0.39028479	0.370436714	0.571978159	0.236146462	0.399291499	0.197375184	0.176598193	0.204613585	0.183485271	0.186812182	0.250248525	0.427721424	0.391841641	0.423169789	0.473250543	0.690733176	0.28092844	0.62917621	0.496984095	0.364947756	0.392255946	0.351393533
630	0.148626894	0.153792119	0.159801927	0.152085497	0.150760083	0.152024711	0.15961833	0.14292833	0.140993847	0.1688082	0.166999149	0.176320613	0.189983618	0.211357635	0.236321541	0.180673025	0.178333453	0.188791373	0.172959699	0.180634251	0.222318441	0.252863024	0.270693452	0.182634976	0.184965102	0.186552481	0.352855817	0.449168284	0.422762486	0.669863004	0.249004215	0.462961488	0.203662292	0.181269039	0.211511364	0.188602656	0.192167143	0.262031025	0.506771589	0.455394645	0.500917279	0.562831852	0.784877815	0.303570562	0.730276185	0.585052219	0.417549785	0.453070937	0.398828668
631	0.151708936	0.157061465	0.163272757	0.155278821	0.153890998	0.155241309	0.163081523	0.14584493	0.143806812	0.172749612	0.170926412	0.180691387	0.195232921	0.218535221	0.247506216	0.185513294	0.182961987	0.194361266	0.177263726	0.18542995	0.231341897	0.267602175	0.290063496	0.187587808	0.190206178	0.191760402	0.398119525	0.524715667	0.490666363	0.762660611	0.26467836	0.545975851	0.210645392	0.186275446	0.219254532	0.194141543	0.198001306	0.2760574	0.608581224	0.539218558	0.60147146	0.668861977	0.845378457	0.332550357	0.81380135	0.683745275	0.488861466	0.533169056	0.463036516
632	0.154884757	0.160443574	0.166877966	0.158576894	0.15711987	0.158565084	0.166677562	0.148839214	0.146687079	0.176888411	0.175052058	0.185331208	0.200910114	0.226586747	0.26080209	0.190709642	0.187907371	0.200449058	0.181825737	0.190574566	0.241750829	0.285671283	0.314448272	0.192918008	0.195890676	0.197397327	0.456951781	0.615304626	0.574563538	0.827666827	0.28428129	0.646536047	0.21849968	0.191683169	0.228068758	0.200191778	0.204423582	0.293018136	0.723612894	0.64169674	0.716117554	0.773361771	0.86255588	0.37002793	0.858827672	0.775379737	0.582469241	0.632513709	0.548241043
633	0.158163234	0.163950045	0.170632766	0.161990155	0.160456116	0.162006706	0.17042123	0.151917822	0.149640022	0.181252493	0.179404453	0.190286742	0.20710633	0.235749206	0.276905314	0.196329802	0.193227364	0.207168115	0.186688437	0.196135507	0.253960131	0.308205835	0.345521461	0.198700899	0.202111636	0.203554305	0.530834659	0.710597912	0.668310421	0.852422666	0.309440965	0.750998069	0.227442164	0.19757528	0.238235779	0.206866103	0.21157117	0.313708195	0.82446608	0.748460798	0.818371496	0.848016884	0.845555879	0.418431694	0.862789619	0.837350646	0.694037452	0.740051814	0.653431797
634	0.161554421	0.167594197	0.174554879	0.165530537	0.163910437	0.165578358	0.174329732	0.155088124	0.152671545	0.185875396	0.184018058	0.195616824	0.213939765	0.246338162	0.296742158	0.202456516	0.198992756	0.214655105	0.191904968	0.202197466	0.268523214	0.336657573	0.385230542	0.205032083	0.208984183	0.210348171	0.616922115	0.790640573	0.755944486	0.842212304	0.342503942	0.833353284	0.237725241	0.204055364	0.250084459	0.214301898	0.219610849	0.338874412	0.880392277	0.831801086	0.877057385	0.875484167	0.808328697	0.479719229	0.837968041	0.858523303	0.802332327	0.830215539	0.7636897
635	0.165069766	0.17139139	0.178664954	0.169211733	0.167495062	0.169294015	0.178423157	0.158358332	0.15578816	0.190797364	0.188934965	0.20139618	0.221564288	0.258771244	0.321499565	0.209188594	0.205288959	0.223067878	0.197541828	0.208866314	0.286164846	0.372726073	0.435399293	0.212032676	0.216648144	0.217928581	0.704397866	0.836239119	0.81669884	0.809862104	0.38672303	0.872130441	0.249619141	0.211250009	0.263964902	0.222660192	0.228736091	0.368943634	0.885035156	0.869409616	0.884191459	0.862277008	0.760291276	0.553632787	0.797075265	0.845419346	0.874509613	0.877576715	0.848848213
636	0.168722353	0.175359372	0.182987003	0.173049498	0.171224011	0.173169762	0.182724988	0.161737643	0.15899708	0.196066533	0.194206745	0.207720109	0.230179984	0.273592787	0.352596235	0.21664166	0.212217633	0.232582646	0.203682474	0.216273739	0.307801616	0.418061327	0.496783941	0.219855661	0.22527154	0.226486504	0.775213006	0.843145478	0.839264158	0.765268553	0.446189092	0.868077991	0.263392093	0.219310876	0.280216216	0.232123639	0.239162514	0.403733434	0.855389689	0.863076372	0.855987716	0.824922388	0.706635184	0.634928265	0.747783377	0.811013325	0.894145658	0.878876183	0.885158217
637	0.172527198	0.179518718	0.187548971	0.177062015	0.17511342	0.177224182	0.187262757	0.16523639	0.162306322	0.201740658	0.199896897	0.21471056	0.240046227	0.291496833	0.391532699	0.224951342	0.219900293	0.243397692	0.210432156	0.224584306	0.334532923	0.473586318	0.567490759	0.228694783	0.235058926	0.236265705	0.813972394	0.821097774	0.82835316	0.714187567	0.524818697	0.836429978	0.279308615	0.228419546	0.299155192	0.242900067	0.251130768	0.44232007	0.808429039	0.829181698	0.809741611	0.775154993	0.650253092	0.711591572	0.694348258	0.764886196	0.873150177	0.849393275	0.876105042
638	0.176501623	0.183893424	0.192383664	0.181270386	0.17918196	0.181478874	0.19206902	0.168866249	0.165724839	0.207890077	0.206084389	0.222524361	0.251498425	0.313343444	0.439524894	0.234282021	0.228486271	0.255748916	0.217924834	0.234007166	0.367574574	0.538336896	0.641255957	0.23879807	0.246267819	0.247579578	0.81836854	0.781861709	0.795733095	0.659889471	0.622857897	0.790268878	0.297653331	0.238799462	0.321096045	0.255237449	0.264924109	0.483087175	0.753058633	0.781030469	0.754712034	0.71916747	0.592725369	0.768284623	0.63912496	0.712593495	0.830618566	0.803841045	0.840107089
639	0.180665754	0.188511768	0.197530213	0.185699342	0.183451407	0.185959153	0.197182785	0.172640469	0.169262668	0.214602324	0.212868827	0.231364533	0.264969056	0.340152302	0.496784922	0.244841666	0.238165689	0.269934135	0.226333065	0.244813704	0.408078674	0.608018346	0.707343417	0.250487279	0.259232567	0.260834716	0.796893034	0.733240393	0.750843146	0.60420967	0.729896993	0.736835704	0.318761353	0.250736891	0.34637381	0.269448577	0.280896842	0.523843706	0.693743993	0.725716763	0.695526177	0.660267416	0.534925401	0.795171362	0.583387068	0.657304699	0.777797247	0.750343646	0.790835971
640	0.185043201	0.193407513	0.203036174	0.190378218	0.187947438	0.190695035	0.202651537	0.176574174	0.172931121	0.22198865	0.220377887	0.241495921	0.281012087	0.373035654	0.561356834	0.256900905	0.249186703	0.286338196	0.235882027	0.257361622	0.456739541	0.674257097	0.754145449	0.26418388	0.274393129	0.276561161	0.759477162	0.679725759	0.699349712	0.548171976	0.820948814	0.680015643	0.343027709	0.264609674	0.375329739	0.285938183	0.299502274	0.561967028	0.632817493	0.666992921	0.634607641	0.600201368	0.477383712	0.793097695	0.527824603	0.60077856	0.720177636	0.693164364	0.735165381
641	0.189661987	0.198621539	0.208960301	0.195342294	0.1927007	0.195722558	0.208533965	0.180684755	0.176743013	0.230192747	0.228777782	0.253266095	0.300325293	0.412999162	0.627829197	0.270815105	0.261876727	0.305453975	0.246868872	0.272125777	0.51306966	0.726374417	0.775137081	0.280441101	0.292327166	0.295446517	0.712991725	0.623862038	0.644496629	0.492366256	0.870167086	0.621872395	0.370880702	0.28092241	0.408234138	0.305227057	0.321311401	0.594675225	0.57147013	0.606860189	0.573198424	0.539909487	0.420521022	0.769645231	0.47282244	0.543979163	0.6606255	0.634554393	0.676661969
642	0.194555738	0.204203934	0.215376046	0.200634492	0.197748204	0.201085484	0.214903492	0.184992343	0.180712952	0.239402138	0.238287473	0.267131255	0.323757306	0.460518866	0.68725534	0.28704946	0.27666814	0.327896535	0.259688206	0.289735136	0.57438943	0.7561383	0.771512075	0.299979046	0.313782669	0.318365636	0.661549993	0.567080299	0.588126351	0.437188707	0.873058733	0.563484683	0.402713387	0.300347416	0.445140211	0.327969443	0.347015521	0.619513277	0.510370512	0.546406111	0.511995596	0.47997061	0.364843324	0.732613106	0.418653529	0.487461724	0.600594801	0.575675938	0.617189325
643	0.199765247	0.210216756	0.222376165	0.206307616	0.203135134	0.206837538	0.221852994	0.189520422	0.184857687	0.249863658	0.249198357	0.283687385	0.352280334	0.514843438	0.729917506	0.306208069	0.294130123	0.354405345	0.27486554	0.311014838	0.635055352	0.761731833	0.749102416	0.323717806	0.339705015	0.346391391	0.607569098	0.510205932	0.531293303	0.383028269	0.844285786	0.505436336	0.438762633	0.323771214	0.485668476	0.354957492	0.377401265	0.634894938	0.449987384	0.48629063	0.451485636	0.420860505	0.311122102	0.687478119	0.3656496	0.431611806	0.540826847	0.517145333	0.557700986
644	0.205340542	0.216737716	0.230078897	0.212427323	0.208917271	0.213045385	0.22950119	0.194296603	0.189196553	0.261904578	0.261901626	0.303705113	0.386895738	0.573141478	0.749978986	0.329063833	0.315005631	0.385816512	0.293099857	0.337025398	0.687071476	0.747004756	0.714077756	0.352793178	0.371238037	0.380753762	0.552458241	0.4537723	0.47464686	0.330442475	0.79871734	0.448099521	0.478914882	0.352337447	0.528737901	0.387092432	0.413268266	0.640406025	0.39080969	0.427029257	0.392168465	0.363158908	0.260536476	0.637684614	0.314371349	0.376840209	0.481740223	0.459334947	0.498718783
645	0.21134399	0.22386577	0.238637289	0.219076618	0.215164628	0.219793138	0.238002385	0.199353751	0.193752103	0.275964264	0.276930165	0.328166286	0.428404595	0.629964202	0.747858376	0.356580207	0.340250437	0.422960666	0.31531944	0.369077854	0.722915231	0.717708509	0.671070956	0.38851678	0.409647434	0.422670707	0.497061887	0.39824391	0.418684648	0.280323232	0.744603989	0.391843668	0.522405692	0.387458403	0.572300434	0.42527206	0.455221	0.636725283	0.33355275	0.369208938	0.334764782	0.3077474	0.214680385	0.585328955	0.26576319	0.323771031	0.42365938	0.402582806	0.440598028
646	0.217853303	0.231726612	0.248248177	0.22636023	0.221965007	0.227186738	0.247556149	0.204730952	0.198550616	0.29262381	0.295000095	0.358259158	0.47701164	0.678145309	0.727935132	0.389874193	0.37102791	0.46643119	0.342713209	0.408639142	0.738648285	0.67886889	0.623251015	0.432187213	0.4560655	0.472952827	0.441973489	0.344201925	0.363953137	0.233949516	0.686372589	0.337213324	0.567544867	0.430691079	0.613362673	0.470130203	0.503299427	0.625199311	0.279310888	0.313663104	0.280369743	0.255923198	0.175253158	0.531730256	0.221166801	0.273375431	0.367000476	0.347371499	0.383724506
647	0.22496744	0.240483187	0.259168804	0.234413066	0.229430919	0.235362446	0.258425386	0.210475525	0.203623192	0.312655539	0.317081437	0.395323805	0.531648994	0.711020258	0.695572747	0.430088419	0.408645115	0.516119095	0.376749115	0.457039896	0.735034645	0.634089972	0.572646404	0.484625506	0.510901691	0.531207485	0.387732583	0.292514096	0.311223723	0.192879831	0.626333632	0.2851014	0.611476588	0.483353238	0.648317145	0.521510312	0.556338503	0.607468528	0.229644444	0.26162252	0.23054202	0.2093901	0.143458044	0.477736856	0.182140846	0.227041281	0.312454516	0.294505942	0.328695712
648	0.232812653	0.250346225	0.271731988	0.243408706	0.237706654	0.244495388	0.270953736	0.216644892	0.209006718	0.337053674	0.344448449	0.440623146	0.589270394	0.72495305	0.655218414	0.478045983	0.454296415	0.570551022	0.41905373	0.514785413	0.715879723	0.585778114	0.520568274	0.545306305	0.572849469	0.594760066	0.33500291	0.244425779	0.261614445	0.158535232	0.565701389	0.236831179	0.650385716	0.545635886	0.673751193	0.577719905	0.611306636	0.585150197	0.186384507	0.214705577	0.187113665	0.169906461	0.119465608	0.423989913	0.149976317	0.186396862	0.261126018	0.245220323	0.276474224
649	0.241555027	0.261595185	0.286373822	0.253576548	0.246982783	0.254816819	0.28559804	0.223310592	0.214745985	0.367057212	0.378724888	0.494726811	0.644270631	0.720660804	0.6098446	0.533434896	0.508379217	0.625951372	0.47098305	0.580065003	0.685737134	0.535445115	0.46789211	0.610791913	0.637313805	0.657397288	0.284747156	0.201516335	0.216625582	0.131558998	0.505149143	0.194077044	0.680226938	0.614732385	0.687484566	0.634512232	0.662794808	0.559635231	0.151037634	0.174630425	0.151601027	0.138562193	0.102305161	0.371124167	0.1250695	0.152808073	0.214594589	0.201157672	0.228503518
650	0.251408107	0.274588632	0.303638346	0.265210928	0.257504606	0.266623288	0.302937636	0.23056035	0.220894663	0.404023884	0.421713874	0.556550502	0.689654712	0.701419111	0.561464607	0.593839654	0.569479578	0.676388825	0.532706643	0.647482904	0.64828312	0.484159669	0.415344482	0.6741036	0.696337198	0.710361691	0.238259406	0.16528774	0.177837362	0.111605571	0.445204287	0.158373167	0.697909321	0.683517587	0.688960494	0.685367375	0.704186754	0.532051765	0.124104173	0.142570337	0.124520268	0.115299695	0.090543519	0.319932559	0.106860194	0.12680509	0.174580754	0.163935306	0.186485475
651	0.262653577	0.289792518	0.324195639	0.278696167	0.269594987	0.280301615	0.323700506	0.238504559	0.227518687	0.449147417	0.474962224	0.621914188	0.719094628	0.671369111	0.511393288	0.653656168	0.632974672	0.714853432	0.601581647	0.707551398	0.606104118	0.43269575	0.363635457	0.725459342	0.740254389	0.745047661	0.197080972	0.136601169	0.146407132	0.097520072	0.386401044	0.130485894	0.702187771	0.740718865	0.679198033	0.722878844	0.72966587	0.503245114	0.104802236	0.118577125	0.10510197	0.09894311	0.082750004	0.271484638	0.094112016	0.107822952	0.142363213	0.13452222	0.151904441
652	0.275664546	0.307802447	0.348823563	0.294530083	0.283678372	0.296351587	0.34875043	0.247283444	0.234699941	0.50272713	0.538556179	0.682769038	0.729641316	0.633949884	0.460558613	0.704517929	0.690623477	0.736054302	0.670421964	0.749730421	0.560917854	0.381748743	0.313631072	0.75633997	0.762237822	0.75726665	0.162583839	0.115222353	0.122489202	0.087923543	0.3295026	0.109992598	0.69382002	0.775636065	0.660091126	0.7419066	0.736755307	0.473801563	0.091562028	0.101564759	0.091777618	0.087871821	0.077809599	0.227156399	0.085490827	0.09456391	0.11808938	0.112704635	0.12528812
653	0.290924638	0.329345545	0.378335153	0.313335593	0.300297466	0.315395182	0.379006691	0.257073152	0.242539407	0.563133814	0.609384516	0.729233027	0.722163952	0.591655646	0.409723278	0.738290481	0.733028664	0.7383971	0.728355892	0.767549855	0.513922447	0.332096306	0.266443391	0.763452336	0.76119746	0.748289134	0.135441016	0.100077562	0.105270037	0.081618201	0.275650467	0.095657744	0.67473629	0.783758067	0.633665258	0.741451473	0.726600551	0.444102769	0.082784299	0.089987061	0.082941911	0.08062766	0.074901782	0.188427409	0.079883005	0.08562896	0.100822224	0.097347425	0.106023173
654	0.309068139	0.355281897	0.41343912	0.335884521	0.320147566	0.338194354	0.41527681	0.268099648	0.251164586	0.625491957	0.679257466	0.753688145	0.700202053	0.546181205	0.359627345	0.750693698	0.75369989	0.724112645	0.764785179	0.761534311	0.465945102	0.284717603	0.22344105	0.749592493	0.74128502	0.723066933	0.115295646	0.089736797	0.093366747	0.077692363	0.226449703	0.085979644	0.647299826	0.768385399	0.601731404	0.724404154	0.702776478	0.414357928	0.077180429	0.082364461	0.077298438	0.076103631	0.073449969	0.156465705	0.076455687	0.079833501	0.089025617	0.086931009	0.092691886
655	0.330910034	0.386542212	0.45446855	0.363085731	0.34408977	0.365627964	0.457917161	0.280652082	0.260736928	0.681638202	0.736078661	0.754545723	0.667729345	0.498716798	0.311147077	0.742848856	0.752067998	0.697200008	0.775131447	0.737139371	0.417645406	0.240840525	0.186036871	0.720453279	0.708228934	0.686815319	0.101018915	0.082920115	0.085415146	0.075484581	0.183741469	0.079678615	0.613661559	0.73655629	0.565749378	0.695123378	0.669170061	0.384684414	0.073829144	0.077565354	0.073919981	0.073515441	0.073041981	0.131628353	0.07460495	0.076298405	0.081233075	0.080109234	0.083778553
656	0.357460123	0.423986386	0.501010564	0.395924987	0.373134086	0.398617077	0.506374932	0.295097038	0.271460315	0.722531972	0.769142387	0.735507911	0.628006986	0.450163843	0.265381759	0.719184716	0.732161837	0.661513189	0.761972329	0.700527449	0.369670135	0.201831561	0.15528741	0.681312246	0.666748329	0.643476259	0.091260174	0.078636442	0.080315764	0.074510675	0.149013891	0.075788905	0.575583663	0.694563022	0.526871757	0.657535574	0.628954551	0.355182265	0.072072726	0.074768743	0.072144741	0.072300775	0.073378836	0.113364493	0.07388799	0.074381041	0.076295917	0.075853376	0.078036134
657	0.389920246	0.468095168	0.551333747	0.435306927	0.408370979	0.437947804	0.558525418	0.31190592	0.283598265	0.742249198	0.774993898	0.702462359	0.583374625	0.401285977	0.223661713	0.684711736	0.699555393	0.619990683	0.731973342	0.656300537	0.322786174	0.168889313	0.131443236	0.635844887	0.619980052	0.595638606	0.084819248	0.076176012	0.077269004	0.074428194	0.122657368	0.073628932	0.534409872	0.646489167	0.485982188	0.614509334	0.584396565	0.325991424	0.071456284	0.073403925	0.071515138	0.072069197	0.074250681	0.100488116	0.073991116	0.073628622	0.07339821	0.0734357	0.074560066
658	0.429545627	0.518465939	0.602046261	0.48170223	0.450738514	0.483919025	0.610376842	0.331670321	0.297487827	0.740362911	0.757687443	0.660346982	0.53551699	0.352883461	0.187339651	0.64325332	0.658738614	0.574701065	0.691257922	0.607394865	0.2779731	0.142619787	0.113905101	0.586443553	0.569978161	0.545050091	0.080777058	0.075024076	0.075694879	0.074987221	0.103827364	0.072706936	0.491162417	0.59483084	0.443789882	0.568030718	0.5370931	0.297329793	0.071652744	0.073060129	0.071702257	0.072539238	0.075504855	0.091720856	0.074685025	0.073712159	0.071955401	0.072332206	0.072701291
659	0.477310974	0.57313066	0.648195451	0.534552562	0.500566416	0.53578314	0.656384839	0.355116763	0.313559862	0.720795274	0.724466313	0.612545804	0.485680156	0.305907238	0.157425157	0.597410124	0.61276922	0.527080974	0.644010081	0.555703738	0.236437968	0.122809789	0.101543013	0.534704558	0.518122732	0.492926116	0.078460447	0.074810075	0.075175934	0.076006765	0.090959457	0.07267029	0.446632377	0.541187754	0.400906662	0.519469604	0.48817434	0.269511681	0.072428252	0.073443495	0.072470998	0.07350908	0.077031246	0.085967261	0.075803395	0.074394546	0.071550353	0.072167678	0.07199632
660	0.533074184	0.627765863	0.6842574	0.591261673	0.556633201	0.590853069	0.690813159	0.383105594	0.332370445	0.688857821	0.681465871	0.561197502	0.434841812	0.26154232	0.134149739	0.548873418	0.563601128	0.478121405	0.592748184	0.502475138	0.199498226	0.108531166	0.093131253	0.481716712	0.465365547	0.440163983	0.077394326	0.075273814	0.075419266	0.077358912	0.082456273	0.073271979	0.401483559	0.486609831	0.357941149	0.469773097	0.438471903	0.242956554	0.073618935	0.074348201	0.073656672	0.074837034	0.078752644	0.082407315	0.077228573	0.0755088	0.071892212	0.072679692	0.072121872
661	0.594448822	0.676095086	0.705955561	0.646720504	0.615279776	0.644186037	0.709703688	0.416542437	0.354606021	0.648865917	0.632637558	0.507811211	0.383913021	0.22114421	0.116971014	0.498842392	0.512608365	0.428599448	0.539175916	0.448649732	0.168264843	0.098626214	0.087632289	0.428345637	0.412490869	0.387579443	0.077227906	0.076223341	0.076209031	0.078949185	0.077055037	0.074329913	0.356385509	0.431900483	0.315597138	0.419697666	0.388723337	0.218152095	0.075103977	0.07562237	0.075137885	0.076418693	0.080612609	0.08043007	0.078873678	0.076931586	0.07276729	0.073675036	0.072840554
662	0.65560773	0.711300577	0.71158182	0.69363771	0.669882447	0.689006933	0.712045713	0.456193458	0.381088213	0.603797305	0.580368933	0.453484186	0.333868749	0.186053558	0.104820763	0.448169894	0.460755551	0.379206349	0.484448736	0.395021153	0.143291083	0.091994902	0.084247502	0.375391101	0.360270126	0.336055523	0.077710366	0.077521484	0.077391109	0.08071039	0.073844971	0.075714096	0.312113815	0.377784775	0.274750195	0.369941925	0.339703727	0.195603437	0.076797377	0.077157553	0.076828244	0.078179888	0.082571585	0.079595324	0.080676969	0.078575004	0.074023379	0.075015886	0.073983368
663	0.707486969	0.728813623	0.702303141	0.72489775	0.712158508	0.718888326	0.699673614	0.50222204	0.412718994	0.555551938	0.526165609	0.399147916	0.285887683	0.15719432	0.096530946	0.397552787	0.408807506	0.330715159	0.429439489	0.342447382	0.124329524	0.087769111	0.082399458	0.323784441	0.309651025	0.286707506	0.078663563	0.079071132	0.07885634	0.082595551	0.072198405	0.077332666	0.269656963	0.325125246	0.236488686	0.321317216	0.292383432	0.175739302	0.078638772	0.078877245	0.078667123	0.080068745	0.084602447	0.07959012	0.082595371	0.08037733	0.075552879	0.076604831	0.075430803
664	0.741251299	0.727748257	0.680755381	0.736504612	0.735565024	0.730274069	0.675596532	0.553575405	0.45030293	0.505457222	0.471114436	0.34578315	0.241370862	0.134786562	0.0910987	0.347717306	0.357533958	0.284101119	0.374984179	0.292001956	0.110577686	0.085287275	0.081657649	0.274707625	0.261855712	0.2409203	0.079955155	0.080800676	0.080524108	0.084570585	0.071659094	0.079118054	0.230212675	0.275059518	0.2020061	0.274859192	0.247988376	0.158836194	0.080584145	0.080725418	0.080610309	0.082047584	0.08668594	0.080182166	0.084597711	0.082293538	0.07727648	0.078370174	0.077094648
665	0.752201352	0.710638395	0.649978995	0.728925365	0.738003461	0.723596468	0.642930969	0.607153272	0.494194768	0.454441627	0.416053399	0.294568627	0.201846344	0.118270773	0.087748484	0.299559336	0.307858856	0.240616464	0.322052329	0.245066075	0.100967428	0.084070392	0.081715109	0.229641107	0.218396026	0.20026533	0.081491024	0.082659844	0.082337671	0.086612148	0.071909366	0.081023	0.195089124	0.229068658	0.172388745	0.231884345	0.207967866	0.144963757	0.082603123	0.082663279	0.082627298	0.084090569	0.088809328	0.081206128	0.08666274	0.084292525	0.079138513	0.080261703	0.078912844
666	0.741693548	0.681434882	0.61254411	0.705850611	0.722051965	0.702171486	0.604169092	0.657458556	0.543632376	0.403276149	0.361821022	0.24697561	0.168616154	0.106609932	0.085912428	0.2542603	0.260991498	0.20170709	0.271908407	0.203245584	0.094498194	0.083772723	0.082351319	0.190187123	0.18082985	0.166122368	0.083203836	0.084613281	0.084256987	0.088704354	0.072724057	0.083014403	0.165392138	0.188807718	0.148275448	0.193858854	0.173708125	0.13398956	0.084674861	0.084664261	0.08469715	0.086180116	0.090964379	0.08254312	0.08877609	0.086352851	0.081099807	0.082244195	0.080841578
667	0.714654502	0.643771521	0.570425899	0.671651846	0.69232842	0.669984237	0.561176919	0.697740275	0.596003231	0.352766507	0.309443405	0.204655105	0.142317963	0.098695363	0.085172251	0.213241203	0.218399492	0.168686309	0.226117661	0.167998908	0.090358287	0.084141196	0.083405437	0.157620286	0.150269406	0.139180289	0.085045003	0.086636014	0.086253638	0.090836461	0.073940165	0.085068979	0.141671058	0.155623348	0.129673865	0.16202223	0.1460793	0.125640323	0.086785147	0.086710456	0.086805582	0.088304385	0.093145969	0.084106584	0.090928143	0.088459746	0.08313264	0.084292821	0.082849719
668	0.676523833	0.600434765	0.525108434	0.630013145	0.653306801	0.63046317	0.515338129	0.722216042	0.646395911	0.303897628	0.26024862	0.169092387	0.122701582	0.093557828	0.085225155	0.177919999	0.181581766	0.142303849	0.186343217	0.140127312	0.087927625	0.08499341	0.084762029	0.132405924	0.126942764	0.119172771	0.086980336	0.088710993	0.088308095	0.093001633	0.075441293	0.087170902	0.123751619	0.130018308	0.116019018	0.136952351	0.125111449	0.119560815	0.088924861	0.088790686	0.088943416	0.090455947	0.095351354	0.085834761	0.093112886	0.090603494	0.085218013	0.086390659	0.084915797
669	0.631399422	0.553374032	0.47772498	0.583528665	0.608267907	0.586076669	0.467712292	0.728381925	0.688170806	0.257930268	0.215854644	0.141071109	0.108781704	0.090447047	0.085853836	0.149261848	0.151610799	0.122436634	0.153863276	0.119412037	0.086748766	0.08619861	0.08633891	0.113997995	0.110111008	0.105041842	0.088986248	0.090826966	0.090407331	0.09519588	0.077144807	0.089309779	0.110856716	0.111417001	0.106422912	0.118326085	0.110018934	0.115370478	0.091088634	0.090898728	0.091105237	0.09263063	0.097579555	0.08768416	0.095326931	0.092778043	0.087343278	0.088526545	0.087025394
670	0.581875261	0.503965643	0.429213737	0.533951436	0.559370691	0.538516948	0.419197551	0.717606861	0.715185089	0.216352444	0.177866847	0.120302707	0.099304023	0.088811706	0.086902198	0.127353292	0.128657797	0.108202293	0.128991994	0.104774665	0.086486784	0.087662935	0.088077731	0.101169434	0.098488374	0.095455002	0.091046743	0.092976807	0.092542955	0.097417242	0.078992187	0.091479061	0.101963432	0.098521554	0.099972201	0.105133088	0.099613064	0.112707093	0.093273778	0.093031769	0.093288315	0.094826597	0.09983088	0.089624394	0.097568773	0.094979943	0.089500296	0.090693392	0.089169091
671	0.529695744	0.453275531	0.380464652	0.482568154	0.508136933	0.489025918	0.370675206	0.693342812	0.72417071	0.180593031	0.147339283	0.105702598	0.093123755	0.088241199	0.088255624	0.111480312	0.112028635	0.098431762	0.111037918	0.094856302	0.086891709	0.089317642	0.089936343	0.092580338	0.090774862	0.089214895	0.093150959	0.095156174	0.0947097	0.099665146	0.080941342	0.093674788	0.09610509	0.089928316	0.095880623	0.096170106	0.092733538	0.111247854	0.095479392	0.095189068	0.095491708	0.097043563	0.102106536	0.091633961	0.099838199	0.097207498	0.091683956	0.092886864	0.091340837
672	0.47608306	0.402207809	0.332431688	0.430382706	0.455686714	0.43855855	0.323116295	0.659437973	0.715591537	0.151602446	0.124339887	0.09585742	0.089326737	0.088438601	0.089832313	0.100467379	0.100506247	0.091992973	0.098667399	0.088392663	0.087782177	0.091113901	0.091885372	0.087068147	0.085886284	0.085380483	0.095292049	0.097362903	0.096904742	0.101940128	0.082963169	0.095895036	0.092481123	0.084435305	0.093524242	0.090332589	0.08841923	0.110720092	0.097705917	0.097371268	0.097715821	0.099282414	0.104408446	0.093698334	0.10213604	0.09946041	0.093891524	0.095104774	0.093537216
673	0.422011651	0.351677191	0.286240332	0.37831651	0.402966086	0.387965282	0.277672509	0.618975162	0.692648492	0.129468654	0.107945264	0.08947753	0.087241338	0.089190465	0.09157396	0.093109964	0.09281896	0.087978432	0.090457035	0.084406455	0.089027021	0.093017141	0.0939045	0.083760538	0.08302167	0.083269251	0.097465973	0.099596363	0.099126971	0.104243541	0.085037813	0.098139328	0.090484103	0.081152957	0.092433815	0.086759331	0.085953382	0.110904185	0.099954684	0.099579746	0.099961947	0.101544802	0.106739058	0.095807899	0.104463911	0.10173939	0.096121951	0.097346475	0.095756678
674	0.368416836	0.302751381	0.243219819	0.327379603	0.350935518	0.338153656	0.23568128	0.574121373	0.659239712	0.113445509	0.096749681	0.085571286	0.08637933	0.090342075	0.09343862	0.088417275	0.087916604	0.085711946	0.085236134	0.082188457	0.09053057	0.0950027	0.09597963	0.082027209	0.081603069	0.082388417	0.099670591	0.101856971	0.101376442	0.106577338	0.087151792	0.100408203	0.089662922	0.079444707	0.092260319	0.084815079	0.084812808	0.1116278	0.102227576	0.101816242	0.102231935	0.103832864	0.109101197	0.097956387	0.106824023	0.104045877	0.098375351	0.099612384	0.09799896
675	0.316375765	0.256746278	0.204803838	0.278808412	0.300731234	0.290226977	0.198530512	0.526364415	0.618632006	0.102323447	0.089387703	0.083432342	0.086393424	0.0917839	0.095396939	0.085655675	0.085024263	0.084707114	0.082153861	0.081237299	0.092224785	0.097053543	0.098101395	0.081421769	0.081220793	0.08238852	0.101905198	0.104145954	0.103654103	0.108943983	0.089296469	0.102703001	0.089691769	0.078862317	0.092751633	0.084044593	0.084624036	0.112760757	0.104526886	0.104082738	0.104528041	0.106149092	0.111498021	0.100140058	0.1092191	0.106381914	0.10065275	0.101903762	0.100264802
[truncated: 525 more rows]
[truncated: 92 more columns]
