# Supplementary material for: Causality Analysis and Cell Network Modeling of Spatial Calcium Signaling Patterns in Liver Lobules
Source: Front Physiol. 2018 Oct 4;9:1377. doi: 10.3389/fphys.2018.01377 (PMC6180170; doi:10.3389/fphys.2018.01377)
Supplement: Supplementary file 1 [file Data_Sheet_1.ZIP › Vadigepalli-Supplementary-Data-Code/Fig8A_data.txt]

Time (sec)	Cell 1	Cell 2	Cell 3	Cell 4	Cell 5	Cell 6	Cell 7	Cell 8	Cell 9	Cell 10	Cell 11	Cell 12	Cell 13	Cell 14	Cell 15	Cell 16	Cell 17	Cell 18	Cell 19	Cell 20	Cell 21	Cell 22	Cell 23	Cell 24	Cell 25	Cell 26	Cell 27	Cell 28	Cell 29	Cell 30	Cell 31	Cell 32	Cell 33	Cell 34	Cell 35	Cell 36	Cell 37	Cell 38	Cell 39	Cell 40	Cell 41	Cell 42	Cell 43	Cell 44	Cell 45	Cell 46	Cell 47	Cell 48	Cell 49
1	0.2	0.2	0.2	0.2	0.2	0.2	0.2	0.2	0.2	0.2	0.2	0.2	0.2	0.2	0.2	0.2	0.2	0.2	0.2	0.2	0.2	0.2	0.2	0.2	0.2	0.2	0.2	0.2	0.2	0.2	0.2	0.2	0.2	0.2	0.2	0.2	0.2	0.2	0.2	0.2	0.2	0.2	0.2	0.2	0.2	0.2	0.2	0.2	0.2
2	0.20519	0.20519	0.20519	0.20519	0.20519	0.20519	0.20519	0.20519	0.20519	0.20519	0.20519	0.20519	0.20519	0.20519	0.20519	0.20519	0.20519	0.20519	0.20519	0.20519	0.20519	0.20519	0.20519	0.20519	0.20519	0.20519	0.20519	0.20519	0.20519	0.20519	0.20519	0.20519	0.20519	0.20519	0.20519	0.20519	0.20519	0.20519	0.20519	0.20519	0.20519	0.20519	0.20519	0.20519	0.20519	0.20519	0.20519	0.20519	0.20519
3	0.20874	0.20874	0.20874	0.20874	0.20874	0.20874	0.20874	0.20874	0.20874	0.20874	0.20874	0.20874	0.20874	0.20874	0.20874	0.20874	0.20874	0.20874	0.20874	0.20874	0.20874	0.20874	0.20874	0.20874	0.20874	0.20874	0.20874	0.20874	0.20874	0.20874	0.20874	0.20874	0.20874	0.20874	0.20874	0.20874	0.20874	0.20874	0.20874	0.20874	0.20874	0.20874	0.20874	0.20874	0.20874	0.20874	0.20874	0.20874	0.20874
4	0.21224	0.21224	0.21224	0.21224	0.21224	0.21224	0.21224	0.21224	0.21224	0.21224	0.21224	0.21224	0.21224	0.21224	0.21224	0.21224	0.21224	0.21224	0.21224	0.21224	0.21224	0.21224	0.21224	0.21224	0.21224	0.21224	0.21224	0.21224	0.21224	0.21224	0.21224	0.21224	0.21224	0.21224	0.21224	0.21224	0.21224	0.21224	0.21224	0.21224	0.21224	0.21224	0.21224	0.21224	0.21224	0.21224	0.21224	0.21224	0.21224
5	0.21577	0.21577	0.21577	0.21577	0.21577	0.21577	0.21577	0.21577	0.21577	0.21577	0.21577	0.21577	0.21577	0.21577	0.21577	0.21577	0.21577	0.21577	0.21577	0.21577	0.21577	0.21577	0.21577	0.21577	0.21577	0.21577	0.21577	0.21577	0.21577	0.21577	0.21577	0.21577	0.21577	0.21577	0.21577	0.21577	0.21577	0.21577	0.21577	0.21577	0.21577	0.21577	0.21577	0.21577	0.21577	0.21577	0.21577	0.21577	0.21577
6	0.21932	0.21932	0.21932	0.21932	0.21932	0.21932	0.21932	0.21932	0.21932	0.21932	0.21932	0.21932	0.21932	0.21932	0.21932	0.21932	0.21932	0.21932	0.21932	0.21932	0.21932	0.21932	0.21932	0.21932	0.21932	0.21932	0.21932	0.21932	0.21932	0.21932	0.21932	0.21932	0.21932	0.21932	0.21932	0.21932	0.21932	0.21932	0.21932	0.21932	0.21932	0.21932	0.21932	0.21932	0.21932	0.21932	0.21932	0.21932	0.21932
7	0.2229	0.2229	0.2229	0.2229	0.2229	0.2229	0.2229	0.2229	0.2229	0.2229	0.2229	0.2229	0.2229	0.2229	0.2229	0.2229	0.2229	0.2229	0.2229	0.2229	0.2229	0.2229	0.2229	0.2229	0.2229	0.2229	0.2229	0.2229	0.2229	0.2229	0.2229	0.2229	0.2229	0.2229	0.2229	0.2229	0.2229	0.2229	0.2229	0.2229	0.2229	0.2229	0.2229	0.2229	0.2229	0.2229	0.2229	0.2229	0.2229
8	0.22652	0.22652	0.22652	0.22652	0.22652	0.22652	0.22652	0.22652	0.22652	0.22652	0.22652	0.22652	0.22652	0.22652	0.22652	0.22652	0.22652	0.22652	0.22652	0.22652	0.22652	0.22652	0.22652	0.22652	0.22652	0.22652	0.22652	0.22652	0.22652	0.22652	0.22652	0.22652	0.22652	0.22652	0.22652	0.22652	0.22652	0.22652	0.22652	0.22652	0.22652	0.22652	0.22652	0.22652	0.22652	0.22652	0.22652	0.22652	0.22652
9	0.23017	0.23017	0.23017	0.23017	0.23017	0.23017	0.23017	0.23017	0.23017	0.23017	0.23017	0.23017	0.23017	0.23017	0.23017	0.23017	0.23017	0.23017	0.23017	0.23017	0.23017	0.23017	0.23017	0.23017	0.23017	0.23017	0.23017	0.23017	0.23017	0.23017	0.23017	0.23017	0.23017	0.23017	0.23017	0.23017	0.23017	0.23017	0.23017	0.23017	0.23017	0.23017	0.23017	0.23017	0.23017	0.23017	0.23017	0.23017	0.23017
10	0.23385	0.23385	0.23385	0.23385	0.23385	0.23385	0.23385	0.23385	0.23385	0.23385	0.23385	0.23385	0.23385	0.23385	0.23385	0.23385	0.23385	0.23385	0.23385	0.23385	0.23385	0.23385	0.23385	0.23385	0.23385	0.23385	0.23385	0.23385	0.23385	0.23385	0.23385	0.23385	0.23385	0.23385	0.23385	0.23385	0.23385	0.23385	0.23385	0.23385	0.23385	0.23385	0.23385	0.23385	0.23385	0.23385	0.23385	0.23385	0.23385
11	0.23756	0.23756	0.23756	0.23756	0.23756	0.23756	0.23756	0.23756	0.23756	0.23756	0.23756	0.23756	0.23756	0.23756	0.23756	0.23756	0.23756	0.23756	0.23756	0.23756	0.23756	0.23756	0.23756	0.23756	0.23756	0.23756	0.23756	0.23756	0.23756	0.23756	0.23756	0.23756	0.23756	0.23756	0.23756	0.23756	0.23756	0.23756	0.23756	0.23756	0.23756	0.23756	0.23756	0.23756	0.23756	0.23756	0.23756	0.23756	0.23756
12	0.2413	0.2413	0.2413	0.2413	0.2413	0.2413	0.2413	0.2413	0.2413	0.2413	0.2413	0.2413	0.2413	0.2413	0.2413	0.2413	0.2413	0.2413	0.2413	0.2413	0.2413	0.2413	0.2413	0.2413	0.2413	0.2413	0.2413	0.2413	0.2413	0.2413	0.2413	0.2413	0.2413	0.2413	0.2413	0.2413	0.2413	0.2413	0.2413	0.2413	0.2413	0.2413	0.2413	0.2413	0.2413	0.2413	0.2413	0.2413	0.2413
13	0.24506	0.24506	0.24506	0.24506	0.24506	0.24506	0.24506	0.24506	0.24506	0.24506	0.24506	0.24506	0.24506	0.24506	0.24506	0.24506	0.24506	0.24506	0.24506	0.24506	0.24506	0.24506	0.24506	0.24506	0.24506	0.24506	0.24506	0.24506	0.24506	0.24506	0.24506	0.24506	0.24506	0.24506	0.24506	0.24506	0.24506	0.24506	0.24506	0.24506	0.24506	0.24506	0.24506	0.24506	0.24506	0.24506	0.24506	0.24506	0.24506
14	0.24884	0.24884	0.24884	0.24884	0.24884	0.24884	0.24884	0.24884	0.24884	0.24884	0.24884	0.24884	0.24884	0.24884	0.24884	0.24884	0.24884	0.24884	0.24884	0.24884	0.24884	0.24884	0.24884	0.24884	0.24884	0.24884	0.24884	0.24884	0.24884	0.24884	0.24884	0.24884	0.24884	0.24884	0.24884	0.24884	0.24884	0.24884	0.24884	0.24884	0.24884	0.24884	0.24884	0.24884	0.24884	0.24884	0.24884	0.24884	0.24884
15	0.25264	0.25264	0.25264	0.25264	0.25264	0.25264	0.25264	0.25264	0.25264	0.25264	0.25264	0.25264	0.25264	0.25264	0.25264	0.25264	0.25264	0.25264	0.25264	0.25264	0.25264	0.25264	0.25264	0.25264	0.25264	0.25264	0.25264	0.25264	0.25264	0.25264	0.25264	0.25264	0.25264	0.25264	0.25264	0.25264	0.25264	0.25264	0.25264	0.25264	0.25264	0.25264	0.25264	0.25264	0.25264	0.25264	0.25264	0.25264	0.25264
16	0.25645	0.25645	0.25645	0.25645	0.25645	0.25645	0.25645	0.25645	0.25645	0.25645	0.25645	0.25645	0.25645	0.25645	0.25645	0.25645	0.25645	0.25645	0.25645	0.25645	0.25645	0.25645	0.25645	0.25645	0.25645	0.25645	0.25645	0.25645	0.25645	0.25645	0.25645	0.25645	0.25645	0.25645	0.25645	0.25645	0.25645	0.25645	0.25645	0.25645	0.25645	0.25645	0.25645	0.25645	0.25645	0.25645	0.25645	0.25645	0.25645
17	0.26027	0.26027	0.26027	0.26027	0.26027	0.26027	0.26027	0.26027	0.26027	0.26027	0.26027	0.26027	0.26027	0.26027	0.26027	0.26027	0.26027	0.26027	0.26027	0.26027	0.26027	0.26027	0.26027	0.26027	0.26027	0.26027	0.26027	0.26027	0.26027	0.26027	0.26027	0.26027	0.26027	0.26027	0.26027	0.26027	0.26027	0.26027	0.26027	0.26027	0.26027	0.26027	0.26027	0.26027	0.26027	0.26027	0.26027	0.26027	0.26027
18	0.26408	0.26408	0.26408	0.26408	0.26408	0.26408	0.26408	0.26408	0.26408	0.26408	0.26408	0.26408	0.26408	0.26408	0.26408	0.26408	0.26408	0.26408	0.26408	0.26408	0.26408	0.26408	0.26408	0.26408	0.26408	0.26408	0.26408	0.26408	0.26408	0.26408	0.26408	0.26408	0.26408	0.26408	0.26408	0.26408	0.26408	0.26408	0.26408	0.26408	0.26408	0.26408	0.26408	0.26408	0.26408	0.26408	0.26408	0.26408	0.26408
19	0.26789	0.26789	0.26789	0.26789	0.26789	0.26789	0.26789	0.26789	0.26789	0.26789	0.26789	0.26789	0.26789	0.26789	0.26789	0.26789	0.26789	0.26789	0.26789	0.26789	0.26789	0.26789	0.26789	0.26789	0.26789	0.26789	0.26789	0.26789	0.26789	0.26789	0.26789	0.26789	0.26789	0.26789	0.26789	0.26789	0.26789	0.26789	0.26789	0.26789	0.26789	0.26789	0.26789	0.26789	0.26789	0.26789	0.26789	0.26789	0.26789
20	0.27169	0.27169	0.27169	0.27169	0.27169	0.27169	0.27169	0.27169	0.27169	0.27169	0.27169	0.27169	0.27169	0.27169	0.27169	0.27169	0.27169	0.27169	0.27169	0.27169	0.27169	0.27169	0.27169	0.27169	0.27169	0.27169	0.27169	0.27169	0.27169	0.27169	0.27169	0.27169	0.27169	0.27169	0.27169	0.27169	0.27169	0.27169	0.27169	0.27169	0.27169	0.27169	0.27169	0.27169	0.27169	0.27169	0.27169	0.27169	0.27169
21	0.27546	0.27546	0.27546	0.27546	0.27546	0.27546	0.27546	0.27546	0.27546	0.27546	0.27546	0.27546	0.27546	0.27546	0.27546	0.27546	0.27546	0.27546	0.27546	0.27546	0.27546	0.27546	0.27546	0.27546	0.27546	0.27546	0.27546	0.27546	0.27546	0.27546	0.27546	0.27546	0.27546	0.27546	0.27546	0.27546	0.27546	0.27546	0.27546	0.27546	0.27546	0.27546	0.27546	0.27546	0.27546	0.27546	0.27546	0.27546	0.27546
22	0.2792	0.2792	0.2792	0.2792	0.2792	0.2792	0.2792	0.2792	0.2792	0.2792	0.2792	0.2792	0.2792	0.2792	0.2792	0.2792	0.2792	0.2792	0.2792	0.2792	0.2792	0.2792	0.2792	0.2792	0.2792	0.2792	0.2792	0.2792	0.2792	0.2792	0.2792	0.2792	0.2792	0.2792	0.2792	0.2792	0.2792	0.2792	0.2792	0.2792	0.2792	0.2792	0.2792	0.2792	0.2792	0.2792	0.2792	0.2792	0.2792
23	0.2829	0.2829	0.2829	0.2829	0.2829	0.2829	0.2829	0.2829	0.2829	0.2829	0.2829	0.2829	0.2829	0.2829	0.2829	0.2829	0.2829	0.2829	0.2829	0.2829	0.2829	0.2829	0.2829	0.2829	0.2829	0.2829	0.2829	0.2829	0.2829	0.2829	0.2829	0.2829	0.2829	0.2829	0.2829	0.2829	0.2829	0.2829	0.2829	0.2829	0.2829	0.2829	0.2829	0.2829	0.2829	0.2829	0.2829	0.2829	0.2829
24	0.28656	0.28656	0.28656	0.28656	0.28656	0.28656	0.28656	0.28656	0.28656	0.28656	0.28656	0.28656	0.28656	0.28656	0.28656	0.28656	0.28656	0.28656	0.28656	0.28656	0.28656	0.28656	0.28656	0.28656	0.28656	0.28656	0.28656	0.28656	0.28656	0.28656	0.28656	0.28656	0.28656	0.28656	0.28656	0.28656	0.28656	0.28656	0.28656	0.28656	0.28656	0.28656	0.28656	0.28656	0.28656	0.28656	0.28656	0.28656	0.28656
25	0.29015	0.29015	0.29015	0.29015	0.29015	0.29015	0.29015	0.29015	0.29015	0.29015	0.29015	0.29015	0.29015	0.29015	0.29015	0.29015	0.29015	0.29015	0.29015	0.29015	0.29015	0.29015	0.29015	0.29015	0.29015	0.29015	0.29015	0.29015	0.29015	0.29015	0.29015	0.29015	0.29015	0.29015	0.29015	0.29015	0.29015	0.29015	0.29015	0.29015	0.29015	0.29015	0.29015	0.29015	0.29015	0.29015	0.29015	0.29015	0.29015
26	0.29367	0.29367	0.29367	0.29367	0.29367	0.29367	0.29367	0.29367	0.29367	0.29367	0.29367	0.29367	0.29367	0.29367	0.29367	0.29367	0.29367	0.29367	0.29367	0.29367	0.29367	0.29367	0.29367	0.29367	0.29367	0.29367	0.29367	0.29367	0.29367	0.29367	0.29367	0.29367	0.29367	0.29367	0.29367	0.29367	0.29367	0.29367	0.29367	0.29367	0.29367	0.29367	0.29367	0.29367	0.29367	0.29367	0.29367	0.29367	0.29367
27	0.29712	0.29712	0.29712	0.29712	0.29712	0.29712	0.29712	0.29712	0.29712	0.29712	0.29712	0.29712	0.29712	0.29712	0.29712	0.29712	0.29712	0.29712	0.29712	0.29712	0.29712	0.29712	0.29712	0.29712	0.29712	0.29712	0.29712	0.29712	0.29712	0.29712	0.29712	0.29712	0.29712	0.29712	0.29712	0.29712	0.29712	0.29712	0.29712	0.29712	0.29712	0.29712	0.29712	0.29712	0.29712	0.29712	0.29712	0.29712	0.29712
28	0.30047	0.30047	0.30047	0.30047	0.30047	0.30047	0.30047	0.30047	0.30047	0.30047	0.30047	0.30047	0.30047	0.30047	0.30047	0.30047	0.30047	0.30047	0.30047	0.30047	0.30047	0.30047	0.30047	0.30047	0.30047	0.30047	0.30047	0.30047	0.30047	0.30047	0.30047	0.30047	0.30047	0.30047	0.30047	0.30047	0.30047	0.30047	0.30047	0.30047	0.30047	0.30047	0.30047	0.30047	0.30047	0.30047	0.30047	0.30047	0.30047
29	0.30372	0.30372	0.30372	0.30372	0.30372	0.30372	0.30372	0.30372	0.30372	0.30372	0.30372	0.30372	0.30372	0.30372	0.30372	0.30372	0.30372	0.30372	0.30372	0.30372	0.30372	0.30372	0.30372	0.30372	0.30372	0.30372	0.30372	0.30372	0.30372	0.30372	0.30372	0.30372	0.30372	0.30372	0.30372	0.30372	0.30372	0.30372	0.30372	0.30372	0.30372	0.30372	0.30372	0.30372	0.30372	0.30372	0.30372	0.30372	0.30372
30	0.30686	0.30686	0.30686	0.30686	0.30686	0.30686	0.30686	0.30686	0.30686	0.30686	0.30686	0.30686	0.30686	0.30686	0.30686	0.30686	0.30686	0.30686	0.30686	0.30686	0.30686	0.30686	0.30686	0.30686	0.30686	0.30686	0.30686	0.30686	0.30686	0.30686	0.30686	0.30686	0.30686	0.30686	0.30686	0.30686	0.30686	0.30686	0.30686	0.30686	0.30686	0.30686	0.30686	0.30686	0.30686	0.30686	0.30686	0.30686	0.30686
31	0.30989	0.30989	0.30989	0.30989	0.30989	0.30989	0.30989	0.30989	0.30989	0.30989	0.30989	0.30989	0.30989	0.30989	0.30989	0.30989	0.30989	0.30989	0.30989	0.30989	0.30989	0.30989	0.30989	0.30989	0.30989	0.30989	0.30989	0.30989	0.30989	0.30989	0.30989	0.30989	0.30989	0.30989	0.30989	0.30989	0.30989	0.30989	0.30989	0.30989	0.30989	0.30989	0.30989	0.30989	0.30989	0.30989	0.30989	0.30989	0.30989
32	0.31278	0.31278	0.31278	0.31278	0.31278	0.31278	0.31278	0.31278	0.31278	0.31278	0.31278	0.31278	0.31278	0.31278	0.31278	0.31278	0.31278	0.31278	0.31278	0.31278	0.31278	0.31278	0.31278	0.31278	0.31278	0.31278	0.31278	0.31278	0.31278	0.31278	0.31278	0.31278	0.31278	0.31278	0.31278	0.31278	0.31278	0.31278	0.31278	0.31278	0.31278	0.31278	0.31278	0.31278	0.31278	0.31278	0.31278	0.31278	0.31278
33	0.31553	0.31553	0.31553	0.31553	0.31553	0.31553	0.31553	0.31553	0.31553	0.31553	0.31553	0.31553	0.31553	0.31553	0.31553	0.31553	0.31553	0.31553	0.31553	0.31553	0.31553	0.31553	0.31553	0.31553	0.31553	0.31553	0.31553	0.31553	0.31553	0.31553	0.31553	0.31553	0.31553	0.31553	0.31553	0.31553	0.31553	0.31553	0.31553	0.31553	0.31553	0.31553	0.31553	0.31553	0.31553	0.31553	0.31553	0.31553	0.31553
34	0.31813	0.31813	0.31813	0.31813	0.31813	0.31813	0.31813	0.31813	0.31813	0.31813	0.31813	0.31813	0.31813	0.31813	0.31813	0.31813	0.31813	0.31813	0.31813	0.31813	0.31813	0.31813	0.31813	0.31813	0.31813	0.31813	0.31813	0.31813	0.31813	0.31813	0.31813	0.31813	0.31813	0.31813	0.31813	0.31813	0.31813	0.31813	0.31813	0.31813	0.31813	0.31813	0.31813	0.31813	0.31813	0.31813	0.31813	0.31813	0.31813
35	0.32057	0.32057	0.32057	0.32057	0.32057	0.32057	0.32057	0.32057	0.32057	0.32057	0.32057	0.32057	0.32057	0.32057	0.32057	0.32057	0.32057	0.32057	0.32057	0.32057	0.32057	0.32057	0.32057	0.32057	0.32057	0.32057	0.32057	0.32057	0.32057	0.32057	0.32057	0.32057	0.32057	0.32057	0.32057	0.32057	0.32057	0.32057	0.32057	0.32057	0.32057	0.32057	0.32057	0.32057	0.32057	0.32057	0.32057	0.32057	0.32057
36	0.32286	0.32286	0.32286	0.32286	0.32286	0.32286	0.32286	0.32286	0.32286	0.32286	0.32286	0.32286	0.32286	0.32286	0.32286	0.32286	0.32286	0.32286	0.32286	0.32286	0.32286	0.32286	0.32286	0.32286	0.32286	0.32286	0.32286	0.32286	0.32286	0.32286	0.32286	0.32286	0.32286	0.32286	0.32286	0.32286	0.32286	0.32286	0.32286	0.32286	0.32286	0.32286	0.32286	0.32286	0.32286	0.32286	0.32286	0.32286	0.32286
37	0.32497	0.32497	0.32497	0.32497	0.32497	0.32497	0.32497	0.32497	0.32497	0.32497	0.32497	0.32497	0.32497	0.32497	0.32497	0.32497	0.32497	0.32497	0.32497	0.32497	0.32497	0.32497	0.32497	0.32497	0.32497	0.32497	0.32497	0.32497	0.32497	0.32497	0.32497	0.32497	0.32497	0.32497	0.32497	0.32497	0.32497	0.32497	0.32497	0.32497	0.32497	0.32497	0.32497	0.32497	0.32497	0.32497	0.32497	0.32497	0.32497
38	0.3269	0.3269	0.3269	0.3269	0.3269	0.3269	0.3269	0.3269	0.3269	0.3269	0.3269	0.3269	0.3269	0.3269	0.3269	0.3269	0.3269	0.3269	0.3269	0.3269	0.3269	0.3269	0.3269	0.3269	0.3269	0.3269	0.3269	0.3269	0.3269	0.3269	0.3269	0.3269	0.3269	0.3269	0.3269	0.3269	0.3269	0.3269	0.3269	0.3269	0.3269	0.3269	0.3269	0.3269	0.3269	0.3269	0.3269	0.3269	0.3269
39	0.32866	0.32866	0.32866	0.32866	0.32866	0.32866	0.32866	0.32866	0.32866	0.32866	0.32866	0.32866	0.32866	0.32866	0.32866	0.32866	0.32866	0.32866	0.32866	0.32866	0.32866	0.32866	0.32866	0.32866	0.32866	0.32866	0.32866	0.32866	0.32866	0.32866	0.32866	0.32866	0.32866	0.32866	0.32866	0.32866	0.32866	0.32866	0.32866	0.32866	0.32866	0.32866	0.32866	0.32866	0.32866	0.32866	0.32866	0.32866	0.32866
40	0.33024	0.33024	0.33024	0.33024	0.33024	0.33024	0.33024	0.33024	0.33024	0.33024	0.33024	0.33024	0.33024	0.33024	0.33024	0.33024	0.33024	0.33024	0.33024	0.33024	0.33024	0.33024	0.33024	0.33024	0.33024	0.33024	0.33024	0.33024	0.33024	0.33024	0.33024	0.33024	0.33024	0.33024	0.33024	0.33024	0.33024	0.33024	0.33024	0.33024	0.33024	0.33024	0.33024	0.33024	0.33024	0.33024	0.33024	0.33024	0.33024
41	0.33164	0.33164	0.33164	0.33164	0.33164	0.33164	0.33164	0.33164	0.33164	0.33164	0.33164	0.33164	0.33164	0.33164	0.33164	0.33164	0.33164	0.33164	0.33164	0.33164	0.33164	0.33164	0.33164	0.33164	0.33164	0.33164	0.33164	0.33164	0.33164	0.33164	0.33164	0.33164	0.33164	0.33164	0.33164	0.33164	0.33164	0.33164	0.33164	0.33164	0.33164	0.33164	0.33164	0.33164	0.33164	0.33164	0.33164	0.33164	0.33164
42	0.33286	0.33286	0.33286	0.33286	0.33286	0.33286	0.33286	0.33286	0.33286	0.33286	0.33286	0.33286	0.33286	0.33286	0.33286	0.33286	0.33286	0.33286	0.33286	0.33286	0.33286	0.33286	0.33286	0.33286	0.33286	0.33286	0.33286	0.33286	0.33286	0.33286	0.33286	0.33286	0.33286	0.33286	0.33286	0.33286	0.33286	0.33286	0.33286	0.33286	0.33286	0.33286	0.33286	0.33286	0.33286	0.33286	0.33286	0.33286	0.33286
43	0.3339	0.3339	0.3339	0.3339	0.3339	0.3339	0.3339	0.3339	0.3339	0.3339	0.3339	0.3339	0.3339	0.3339	0.3339	0.3339	0.3339	0.3339	0.3339	0.3339	0.3339	0.3339	0.3339	0.3339	0.3339	0.3339	0.3339	0.3339	0.3339	0.3339	0.3339	0.3339	0.3339	0.3339	0.3339	0.3339	0.3339	0.3339	0.3339	0.3339	0.3339	0.3339	0.3339	0.3339	0.3339	0.3339	0.3339	0.3339	0.3339
44	0.33476	0.33476	0.33476	0.33476	0.33476	0.33476	0.33476	0.33476	0.33476	0.33476	0.33476	0.33476	0.33476	0.33476	0.33476	0.33476	0.33476	0.33476	0.33476	0.33476	0.33476	0.33476	0.33476	0.33476	0.33476	0.33476	0.33476	0.33476	0.33476	0.33476	0.33476	0.33476	0.33476	0.33476	0.33476	0.33476	0.33476	0.33476	0.33476	0.33476	0.33476	0.33476	0.33476	0.33476	0.33476	0.33476	0.33476	0.33476	0.33476
45	0.33545	0.33545	0.33545	0.33545	0.33545	0.33545	0.33545	0.33545	0.33545	0.33545	0.33545	0.33545	0.33545	0.33545	0.33545	0.33545	0.33545	0.33545	0.33545	0.33545	0.33545	0.33545	0.33545	0.33545	0.33545	0.33545	0.33545	0.33545	0.33545	0.33545	0.33545	0.33545	0.33545	0.33545	0.33545	0.33545	0.33545	0.33545	0.33545	0.33545	0.33545	0.33545	0.33545	0.33545	0.33545	0.33545	0.33545	0.33545	0.33545
46	0.33597	0.33597	0.33597	0.33597	0.33597	0.33597	0.33597	0.33597	0.33597	0.33597	0.33597	0.33597	0.33597	0.33597	0.33597	0.33597	0.33597	0.33597	0.33597	0.33597	0.33597	0.33597	0.33597	0.33597	0.33597	0.33597	0.33597	0.33597	0.33597	0.33597	0.33597	0.33597	0.33597	0.33597	0.33597	0.33597	0.33597	0.33597	0.33597	0.33597	0.33597	0.33597	0.33597	0.33597	0.33597	0.33597	0.33597	0.33597	0.33597
47	0.33633	0.33633	0.33633	0.33633	0.33633	0.33633	0.33633	0.33633	0.33633	0.33633	0.33633	0.33633	0.33633	0.33633	0.33633	0.33633	0.33633	0.33633	0.33633	0.33633	0.33633	0.33633	0.33633	0.33633	0.33633	0.33633	0.33633	0.33633	0.33633	0.33633	0.33633	0.33633	0.33633	0.33633	0.33633	0.33633	0.33633	0.33633	0.33633	0.33633	0.33633	0.33633	0.33633	0.33633	0.33633	0.33633	0.33633	0.33633	0.33633
48	0.33654	0.33654	0.33654	0.33654	0.33654	0.33654	0.33654	0.33654	0.33654	0.33654	0.33654	0.33654	0.33654	0.33654	0.33654	0.33654	0.33654	0.33654	0.33654	0.33654	0.33654	0.33654	0.33654	0.33654	0.33654	0.33654	0.33654	0.33654	0.33654	0.33654	0.33654	0.33654	0.33654	0.33654	0.33654	0.33654	0.33654	0.33654	0.33654	0.33654	0.33654	0.33654	0.33654	0.33654	0.33654	0.33654	0.33654	0.33654	0.33654
49	0.33661	0.33661	0.33661	0.33661	0.33661	0.33661	0.33661	0.33661	0.33661	0.33661	0.33661	0.33661	0.33661	0.33661	0.33661	0.33661	0.33661	0.33661	0.33661	0.33661	0.33661	0.33661	0.33661	0.33661	0.33661	0.33661	0.33661	0.33661	0.33661	0.33661	0.33661	0.33661	0.33661	0.33661	0.33661	0.33661	0.33661	0.33661	0.33661	0.33661	0.33661	0.33661	0.33661	0.33661	0.33661	0.33661	0.33661	0.33661	0.33661
50	0.33655	0.33655	0.33655	0.33655	0.33655	0.33655	0.33655	0.33655	0.33655	0.33655	0.33655	0.33655	0.33655	0.33655	0.33655	0.33655	0.33655	0.33655	0.33655	0.33655	0.33655	0.33655	0.33655	0.33655	0.33655	0.33655	0.33655	0.33655	0.33655	0.33655	0.33655	0.33655	0.33655	0.33655	0.33655	0.33655	0.33655	0.33655	0.33655	0.33655	0.33655	0.33655	0.33655	0.33655	0.33655	0.33655	0.33655	0.33655	0.33655
51	0.33637	0.33637	0.33637	0.33637	0.33637	0.33637	0.33637	0.33637	0.33637	0.33637	0.33637	0.33637	0.33637	0.33637	0.33637	0.33637	0.33637	0.33637	0.33637	0.33637	0.33637	0.33637	0.33637	0.33637	0.33637	0.33637	0.33637	0.33637	0.33637	0.33637	0.33637	0.33637	0.33637	0.33637	0.33637	0.33637	0.33637	0.33637	0.33637	0.33637	0.33637	0.33637	0.33637	0.33637	0.33637	0.33637	0.33637	0.33637	0.33637
52	0.33608	0.33608	0.33608	0.33608	0.33608	0.33608	0.33608	0.33608	0.33608	0.33608	0.33608	0.33608	0.33608	0.33608	0.33608	0.33608	0.33608	0.33608	0.33608	0.33608	0.33608	0.33608	0.33608	0.33608	0.33608	0.33608	0.33608	0.33608	0.33608	0.33608	0.33608	0.33608	0.33608	0.33608	0.33608	0.33608	0.33608	0.33608	0.33608	0.33608	0.33608	0.33608	0.33608	0.33608	0.33608	0.33608	0.33608	0.33608	0.33608
53	0.33569	0.33569	0.33569	0.33569	0.33569	0.33569	0.33569	0.33569	0.33569	0.33569	0.33569	0.33569	0.33569	0.33569	0.33569	0.33569	0.33569	0.33569	0.33569	0.33569	0.33569	0.33569	0.33569	0.33569	0.33569	0.33569	0.33569	0.33569	0.33569	0.33569	0.33569	0.33569	0.33569	0.33569	0.33569	0.33569	0.33569	0.33569	0.33569	0.33569	0.33569	0.33569	0.33569	0.33569	0.33569	0.33569	0.33569	0.33569	0.33569
54	0.33521	0.33521	0.33521	0.33521	0.33521	0.33521	0.33521	0.33521	0.33521	0.33521	0.33521	0.33521	0.33521	0.33521	0.33521	0.33521	0.33521	0.33521	0.33521	0.33521	0.33521	0.33521	0.33521	0.33521	0.33521	0.33521	0.33521	0.33521	0.33521	0.33521	0.33521	0.33521	0.33521	0.33521	0.33521	0.33521	0.33521	0.33521	0.33521	0.33521	0.33521	0.33521	0.33521	0.33521	0.33521	0.33521	0.33521	0.33521	0.33521
55	0.33466	0.33466	0.33466	0.33466	0.33466	0.33466	0.33466	0.33466	0.33466	0.33466	0.33466	0.33466	0.33466	0.33466	0.33466	0.33466	0.33466	0.33466	0.33466	0.33466	0.33466	0.33466	0.33466	0.33466	0.33466	0.33466	0.33466	0.33466	0.33466	0.33466	0.33466	0.33466	0.33466	0.33466	0.33466	0.33466	0.33466	0.33466	0.33466	0.33466	0.33466	0.33466	0.33466	0.33466	0.33466	0.33466	0.33466	0.33466	0.33466
56	0.33405	0.33405	0.33405	0.33405	0.33405	0.33405	0.33405	0.33405	0.33405	0.33405	0.33405	0.33405	0.33405	0.33405	0.33405	0.33405	0.33405	0.33405	0.33405	0.33405	0.33405	0.33405	0.33405	0.33405	0.33405	0.33405	0.33405	0.33405	0.33405	0.33405	0.33405	0.33405	0.33405	0.33405	0.33405	0.33405	0.33405	0.33405	0.33405	0.33405	0.33405	0.33405	0.33405	0.33405	0.33405	0.33405	0.33405	0.33405	0.33405
57	0.3334	0.3334	0.3334	0.3334	0.3334	0.3334	0.3334	0.3334	0.3334	0.3334	0.3334	0.3334	0.3334	0.3334	0.3334	0.3334	0.3334	0.3334	0.3334	0.3334	0.3334	0.3334	0.3334	0.3334	0.3334	0.3334	0.3334	0.3334	0.3334	0.3334	0.3334	0.3334	0.3334	0.3334	0.3334	0.3334	0.3334	0.3334	0.3334	0.3334	0.3334	0.3334	0.3334	0.3334	0.3334	0.3334	0.3334	0.3334	0.3334
58	0.33271	0.33271	0.33271	0.33271	0.33271	0.33271	0.33271	0.33271	0.33271	0.33271	0.33271	0.33271	0.33271	0.33271	0.33271	0.33271	0.33271	0.33271	0.33271	0.33271	0.33271	0.33271	0.33271	0.33271	0.33271	0.33271	0.33271	0.33271	0.33271	0.33271	0.33271	0.33271	0.33271	0.33271	0.33271	0.33271	0.33271	0.33271	0.33271	0.33271	0.33271	0.33271	0.33271	0.33271	0.33271	0.33271	0.33271	0.33271	0.33271
59	0.33198	0.33198	0.33198	0.33198	0.33198	0.33198	0.33198	0.33198	0.33198	0.33198	0.33198	0.33198	0.33198	0.33198	0.33198	0.33198	0.33198	0.33198	0.33198	0.33198	0.33198	0.33198	0.33198	0.33198	0.33198	0.33198	0.33198	0.33198	0.33198	0.33198	0.33198	0.33198	0.33198	0.33198	0.33198	0.33198	0.33198	0.33198	0.33198	0.33198	0.33198	0.33198	0.33198	0.33198	0.33198	0.33198	0.33198	0.33198	0.33198
60	0.33124	0.33124	0.33124	0.33124	0.33124	0.33124	0.33124	0.33124	0.33124	0.33124	0.33124	0.33124	0.33124	0.33124	0.33124	0.33124	0.33124	0.33124	0.33124	0.33124	0.33124	0.33124	0.33124	0.33124	0.33124	0.33124	0.33124	0.33124	0.33124	0.33124	0.33124	0.33124	0.33124	0.33124	0.33124	0.33124	0.33124	0.33124	0.33124	0.33124	0.33124	0.33124	0.33124	0.33124	0.33124	0.33124	0.33124	0.33124	0.33124
61	0.3305	0.3305	0.3305	0.3305	0.3305	0.3305	0.3305	0.3305	0.3305	0.3305	0.3305	0.3305	0.3305	0.3305	0.3305	0.3305	0.3305	0.3305	0.3305	0.3305	0.3305	0.3305	0.3305	0.3305	0.3305	0.3305	0.3305	0.3305	0.3305	0.3305	0.3305	0.3305	0.3305	0.3305	0.3305	0.3305	0.3305	0.3305	0.3305	0.3305	0.3305	0.3305	0.3305	0.3305	0.3305	0.3305	0.3305	0.3305	0.3305
62	0.32976	0.32976	0.32976	0.32976	0.32976	0.32976	0.32976	0.32976	0.32976	0.32976	0.32976	0.32976	0.32976	0.32976	0.32976	0.32976	0.32976	0.32976	0.32976	0.32976	0.32976	0.32976	0.32976	0.32976	0.32976	0.32976	0.32976	0.32976	0.32976	0.32976	0.32976	0.32976	0.32976	0.32976	0.32976	0.32976	0.32976	0.32976	0.32976	0.32976	0.32976	0.32976	0.32976	0.32976	0.32976	0.32976	0.32976	0.32976	0.32976
63	0.32903	0.32903	0.32903	0.32903	0.32903	0.32903	0.32903	0.32903	0.32903	0.32903	0.32903	0.32903	0.32903	0.32903	0.32903	0.32903	0.32903	0.32903	0.32903	0.32903	0.32903	0.32903	0.32903	0.32903	0.32903	0.32903	0.32903	0.32903	0.32903	0.32903	0.32903	0.32903	0.32903	0.32903	0.32903	0.32903	0.32903	0.32903	0.32903	0.32903	0.32903	0.32903	0.32903	0.32903	0.32903	0.32903	0.32903	0.32903	0.32903
64	0.32831	0.32831	0.32831	0.32831	0.32831	0.32831	0.32831	0.32831	0.32831	0.32831	0.32831	0.32831	0.32831	0.32831	0.32831	0.32831	0.32831	0.32831	0.32831	0.32831	0.32831	0.32831	0.32831	0.32831	0.32831	0.32831	0.32831	0.32831	0.32831	0.32831	0.32831	0.32831	0.32831	0.32831	0.32831	0.32831	0.32831	0.32831	0.32831	0.32831	0.32831	0.32831	0.32831	0.32831	0.32831	0.32831	0.32831	0.32831	0.32831
65	0.32761	0.32761	0.32761	0.32761	0.32761	0.32761	0.32761	0.32761	0.32761	0.32761	0.32761	0.32761	0.32761	0.32761	0.32761	0.32761	0.32761	0.32761	0.32761	0.32761	0.32761	0.32761	0.32761	0.32761	0.32761	0.32761	0.32761	0.32761	0.32761	0.32761	0.32761	0.32761	0.32761	0.32761	0.32761	0.32761	0.32761	0.32761	0.32761	0.32761	0.32761	0.32761	0.32761	0.32761	0.32761	0.32761	0.32761	0.32761	0.32761
66	0.32694	0.32694	0.32694	0.32694	0.32694	0.32694	0.32694	0.32694	0.32694	0.32694	0.32694	0.32694	0.32694	0.32694	0.32694	0.32694	0.32694	0.32694	0.32694	0.32694	0.32694	0.32694	0.32694	0.32694	0.32694	0.32694	0.32694	0.32694	0.32694	0.32694	0.32694	0.32694	0.32694	0.32694	0.32694	0.32694	0.32694	0.32694	0.32694	0.32694	0.32694	0.32694	0.32694	0.32694	0.32694	0.32694	0.32694	0.32694	0.32694
67	0.3263	0.3263	0.3263	0.3263	0.3263	0.3263	0.3263	0.3263	0.3263	0.3263	0.3263	0.3263	0.3263	0.3263	0.3263	0.3263	0.3263	0.3263	0.3263	0.3263	0.3263	0.3263	0.3263	0.3263	0.3263	0.3263	0.3263	0.3263	0.3263	0.3263	0.3263	0.3263	0.3263	0.3263	0.3263	0.3263	0.3263	0.3263	0.3263	0.3263	0.3263	0.3263	0.3263	0.3263	0.3263	0.3263	0.3263	0.3263	0.3263
68	0.3257	0.3257	0.3257	0.3257	0.3257	0.3257	0.3257	0.3257	0.3257	0.3257	0.3257	0.3257	0.3257	0.3257	0.3257	0.3257	0.3257	0.3257	0.3257	0.3257	0.3257	0.3257	0.3257	0.3257	0.3257	0.3257	0.3257	0.3257	0.3257	0.3257	0.3257	0.3257	0.3257	0.3257	0.3257	0.3257	0.3257	0.3257	0.3257	0.3257	0.3257	0.3257	0.3257	0.3257	0.3257	0.3257	0.3257	0.3257	0.3257
69	0.32513	0.32513	0.32513	0.32513	0.32513	0.32513	0.32513	0.32513	0.32513	0.32513	0.32513	0.32513	0.32513	0.32513	0.32513	0.32513	0.32513	0.32513	0.32513	0.32513	0.32513	0.32513	0.32513	0.32513	0.32513	0.32513	0.32513	0.32513	0.32513	0.32513	0.32513	0.32513	0.32513	0.32513	0.32513	0.32513	0.32513	0.32513	0.32513	0.32513	0.32513	0.32513	0.32513	0.32513	0.32513	0.32513	0.32513	0.32513	0.32513
70	0.32461	0.32461	0.32461	0.32461	0.32461	0.32461	0.32461	0.32461	0.32461	0.32461	0.32461	0.32461	0.32461	0.32461	0.32461	0.32461	0.32461	0.32461	0.32461	0.32461	0.32461	0.32461	0.32461	0.32461	0.32461	0.32461	0.32461	0.32461	0.32461	0.32461	0.32461	0.32461	0.32461	0.32461	0.32461	0.32461	0.32461	0.32461	0.32461	0.32461	0.32461	0.32461	0.32461	0.32461	0.32461	0.32461	0.32461	0.32461	0.32461
71	0.32413	0.32413	0.32413	0.32413	0.32413	0.32413	0.32413	0.32413	0.32413	0.32413	0.32413	0.32413	0.32413	0.32413	0.32413	0.32413	0.32413	0.32413	0.32413	0.32413	0.32413	0.32413	0.32413	0.32413	0.32413	0.32413	0.32413	0.32413	0.32413	0.32413	0.32413	0.32413	0.32413	0.32413	0.32413	0.32413	0.32413	0.32413	0.32413	0.32413	0.32413	0.32413	0.32413	0.32413	0.32413	0.32413	0.32413	0.32413	0.32413
72	0.3237	0.3237	0.3237	0.3237	0.3237	0.3237	0.3237	0.3237	0.3237	0.3237	0.3237	0.3237	0.3237	0.3237	0.3237	0.3237	0.3237	0.3237	0.3237	0.3237	0.3237	0.3237	0.3237	0.3237	0.3237	0.3237	0.3237	0.3237	0.3237	0.3237	0.3237	0.3237	0.3237	0.3237	0.3237	0.3237	0.3237	0.3237	0.3237	0.3237	0.3237	0.3237	0.3237	0.3237	0.3237	0.3237	0.3237	0.3237	0.3237
73	0.32331	0.32331	0.32331	0.32331	0.32331	0.32331	0.32331	0.32331	0.32331	0.32331	0.32331	0.32331	0.32331	0.32331	0.32331	0.32331	0.32331	0.32331	0.32331	0.32331	0.32331	0.32331	0.32331	0.32331	0.32331	0.32331	0.32331	0.32331	0.32331	0.32331	0.32331	0.32331	0.32331	0.32331	0.32331	0.32331	0.32331	0.32331	0.32331	0.32331	0.32331	0.32331	0.32331	0.32331	0.32331	0.32331	0.32331	0.32331	0.32331
74	0.32297	0.32297	0.32297	0.32297	0.32297	0.32297	0.32297	0.32297	0.32297	0.32297	0.32297	0.32297	0.32297	0.32297	0.32297	0.32297	0.32297	0.32297	0.32297	0.32297	0.32297	0.32297	0.32297	0.32297	0.32297	0.32297	0.32297	0.32297	0.32297	0.32297	0.32297	0.32297	0.32297	0.32297	0.32297	0.32297	0.32297	0.32297	0.32297	0.32297	0.32297	0.32297	0.32297	0.32297	0.32297	0.32297	0.32297	0.32297	0.32297
75	0.32267	0.32267	0.32267	0.32267	0.32267	0.32267	0.32267	0.32267	0.32267	0.32267	0.32267	0.32267	0.32267	0.32267	0.32267	0.32267	0.32267	0.32267	0.32267	0.32267	0.32267	0.32267	0.32267	0.32267	0.32267	0.32267	0.32267	0.32267	0.32267	0.32267	0.32267	0.32267	0.32267	0.32267	0.32267	0.32267	0.32267	0.32267	0.32267	0.32267	0.32267	0.32267	0.32267	0.32267	0.32267	0.32267	0.32267	0.32267	0.32267
76	0.32242	0.32242	0.32242	0.32242	0.32242	0.32242	0.32242	0.32242	0.32242	0.32242	0.32242	0.32242	0.32242	0.32242	0.32242	0.32242	0.32242	0.32242	0.32242	0.32242	0.32242	0.32242	0.32242	0.32242	0.32242	0.32242	0.32242	0.32242	0.32242	0.32242	0.32242	0.32242	0.32242	0.32242	0.32242	0.32242	0.32242	0.32242	0.32242	0.32242	0.32242	0.32242	0.32242	0.32242	0.32242	0.32242	0.32242	0.32242	0.32242
77	0.32221	0.32221	0.32221	0.32221	0.32221	0.32221	0.32221	0.32221	0.32221	0.32221	0.32221	0.32221	0.32221	0.32221	0.32221	0.32221	0.32221	0.32221	0.32221	0.32221	0.32221	0.32221	0.32221	0.32221	0.32221	0.32221	0.32221	0.32221	0.32221	0.32221	0.32221	0.32221	0.32221	0.32221	0.32221	0.32221	0.32221	0.32221	0.32221	0.32221	0.32221	0.32221	0.32221	0.32221	0.32221	0.32221	0.32221	0.32221	0.32221
78	0.32204	0.32204	0.32204	0.32204	0.32204	0.32204	0.32204	0.32204	0.32204	0.32204	0.32204	0.32204	0.32204	0.32204	0.32204	0.32204	0.32204	0.32204	0.32204	0.32204	0.32204	0.32204	0.32204	0.32204	0.32204	0.32204	0.32204	0.32204	0.32204	0.32204	0.32204	0.32204	0.32204	0.32204	0.32204	0.32204	0.32204	0.32204	0.32204	0.32204	0.32204	0.32204	0.32204	0.32204	0.32204	0.32204	0.32204	0.32204	0.32204
79	0.32191	0.32191	0.32191	0.32191	0.32191	0.32191	0.32191	0.32191	0.32191	0.32191	0.32191	0.32191	0.32191	0.32191	0.32191	0.32191	0.32191	0.32191	0.32191	0.32191	0.32191	0.32191	0.32191	0.32191	0.32191	0.32191	0.32191	0.32191	0.32191	0.32191	0.32191	0.32191	0.32191	0.32191	0.32191	0.32191	0.32191	0.32191	0.32191	0.32191	0.32191	0.32191	0.32191	0.32191	0.32191	0.32191	0.32191	0.32191	0.32191
80	0.32182	0.32182	0.32182	0.32182	0.32182	0.32182	0.32182	0.32182	0.32182	0.32182	0.32182	0.32182	0.32182	0.32182	0.32182	0.32182	0.32182	0.32182	0.32182	0.32182	0.32182	0.32182	0.32182	0.32182	0.32182	0.32182	0.32182	0.32182	0.32182	0.32182	0.32182	0.32182	0.32182	0.32182	0.32182	0.32182	0.32182	0.32182	0.32182	0.32182	0.32182	0.32182	0.32182	0.32182	0.32182	0.32182	0.32182	0.32182	0.32182
81	0.32176	0.32176	0.32176	0.32176	0.32176	0.32176	0.32176	0.32176	0.32176	0.32176	0.32176	0.32176	0.32176	0.32176	0.32176	0.32176	0.32176	0.32176	0.32176	0.32176	0.32176	0.32176	0.32176	0.32176	0.32176	0.32176	0.32176	0.32176	0.32176	0.32176	0.32176	0.32176	0.32176	0.32176	0.32176	0.32176	0.32176	0.32176	0.32176	0.32176	0.32176	0.32176	0.32176	0.32176	0.32176	0.32176	0.32176	0.32176	0.32176
82	0.32173	0.32173	0.32173	0.32173	0.32173	0.32173	0.32173	0.32173	0.32173	0.32173	0.32173	0.32173	0.32173	0.32173	0.32173	0.32173	0.32173	0.32173	0.32173	0.32173	0.32173	0.32173	0.32173	0.32173	0.32173	0.32173	0.32173	0.32173	0.32173	0.32173	0.32173	0.32173	0.32173	0.32173	0.32173	0.32173	0.32173	0.32173	0.32173	0.32173	0.32173	0.32173	0.32173	0.32173	0.32173	0.32173	0.32173	0.32173	0.32173
83	0.32173	0.32173	0.32173	0.32173	0.32173	0.32173	0.32173	0.32173	0.32173	0.32173	0.32173	0.32173	0.32173	0.32173	0.32173	0.32173	0.32173	0.32173	0.32173	0.32173	0.32173	0.32173	0.32173	0.32173	0.32173	0.32173	0.32173	0.32173	0.32173	0.32173	0.32173	0.32173	0.32173	0.32173	0.32173	0.32173	0.32173	0.32173	0.32173	0.32173	0.32173	0.32173	0.32173	0.32173	0.32173	0.32173	0.32173	0.32173	0.32173
84	0.32177	0.32177	0.32177	0.32177	0.32177	0.32177	0.32177	0.32177	0.32177	0.32177	0.32177	0.32177	0.32177	0.32177	0.32177	0.32177	0.32177	0.32177	0.32177	0.32177	0.32177	0.32177	0.32177	0.32177	0.32177	0.32177	0.32177	0.32177	0.32177	0.32177	0.32177	0.32177	0.32177	0.32177	0.32177	0.32177	0.32177	0.32177	0.32177	0.32177	0.32177	0.32177	0.32177	0.32177	0.32177	0.32177	0.32177	0.32177	0.32177
85	0.32182	0.32182	0.32182	0.32182	0.32182	0.32182	0.32182	0.32182	0.32182	0.32182	0.32182	0.32182	0.32182	0.32182	0.32182	0.32182	0.32182	0.32182	0.32182	0.32182	0.32182	0.32182	0.32182	0.32182	0.32182	0.32182	0.32182	0.32182	0.32182	0.32182	0.32182	0.32182	0.32182	0.32182	0.32182	0.32182	0.32182	0.32182	0.32182	0.32182	0.32182	0.32182	0.32182	0.32182	0.32182	0.32182	0.32182	0.32182	0.32182
86	0.3219	0.3219	0.3219	0.3219	0.3219	0.3219	0.3219	0.3219	0.3219	0.3219	0.3219	0.3219	0.3219	0.3219	0.3219	0.3219	0.3219	0.3219	0.3219	0.3219	0.3219	0.3219	0.3219	0.3219	0.3219	0.3219	0.3219	0.3219	0.3219	0.3219	0.3219	0.3219	0.3219	0.3219	0.3219	0.3219	0.3219	0.3219	0.3219	0.3219	0.3219	0.3219	0.3219	0.3219	0.3219	0.3219	0.3219	0.3219	0.3219
87	0.322	0.322	0.322	0.322	0.322	0.322	0.322	0.322	0.322	0.322	0.322	0.322	0.322	0.322	0.322	0.322	0.322	0.322	0.322	0.322	0.322	0.322	0.322	0.322	0.322	0.322	0.322	0.322	0.322	0.322	0.322	0.322	0.322	0.322	0.322	0.322	0.322	0.322	0.322	0.322	0.322	0.322	0.322	0.322	0.322	0.322	0.322	0.322	0.322
88	0.3221	0.3221	0.3221	0.3221	0.3221	0.3221	0.3221	0.3221	0.3221	0.3221	0.3221	0.3221	0.3221	0.3221	0.3221	0.3221	0.3221	0.3221	0.3221	0.3221	0.3221	0.3221	0.3221	0.3221	0.3221	0.3221	0.3221	0.3221	0.3221	0.3221	0.3221	0.3221	0.3221	0.3221	0.3221	0.3221	0.3221	0.3221	0.3221	0.3221	0.3221	0.3221	0.3221	0.3221	0.3221	0.3221	0.3221	0.3221	0.3221
89	0.32222	0.32222	0.32222	0.32222	0.32222	0.32222	0.32222	0.32222	0.32222	0.32222	0.32222	0.32222	0.32222	0.32222	0.32222	0.32222	0.32222	0.32222	0.32222	0.32222	0.32222	0.32222	0.32222	0.32222	0.32222	0.32222	0.32222	0.32222	0.32222	0.32222	0.32222	0.32222	0.32222	0.32222	0.32222	0.32222	0.32222	0.32222	0.32222	0.32222	0.32222	0.32222	0.32222	0.32222	0.32222	0.32222	0.32222	0.32222	0.32222
90	0.32236	0.32236	0.32236	0.32236	0.32236	0.32236	0.32236	0.32236	0.32236	0.32236	0.32236	0.32236	0.32236	0.32236	0.32236	0.32236	0.32236	0.32236	0.32236	0.32236	0.32236	0.32236	0.32236	0.32236	0.32236	0.32236	0.32236	0.32236	0.32236	0.32236	0.32236	0.32236	0.32236	0.32236	0.32236	0.32236	0.32236	0.32236	0.32236	0.32236	0.32236	0.32236	0.32236	0.32236	0.32236	0.32236	0.32236	0.32236	0.32236
91	0.32251	0.32251	0.32251	0.32251	0.32251	0.32251	0.32251	0.32251	0.32251	0.32251	0.32251	0.32251	0.32251	0.32251	0.32251	0.32251	0.32251	0.32251	0.32251	0.32251	0.32251	0.32251	0.32251	0.32251	0.32251	0.32251	0.32251	0.32251	0.32251	0.32251	0.32251	0.32251	0.32251	0.32251	0.32251	0.32251	0.32251	0.32251	0.32251	0.32251	0.32251	0.32251	0.32251	0.32251	0.32251	0.32251	0.32251	0.32251	0.32251
92	0.32266	0.32266	0.32266	0.32266	0.32266	0.32266	0.32266	0.32266	0.32266	0.32266	0.32266	0.32266	0.32266	0.32266	0.32266	0.32266	0.32266	0.32266	0.32266	0.32266	0.32266	0.32266	0.32266	0.32266	0.32266	0.32266	0.32266	0.32266	0.32266	0.32266	0.32266	0.32266	0.32266	0.32266	0.32266	0.32266	0.32266	0.32266	0.32266	0.32266	0.32266	0.32266	0.32266	0.32266	0.32266	0.32266	0.32266	0.32266	0.32266
93	0.32282	0.32282	0.32282	0.32282	0.32282	0.32282	0.32282	0.32282	0.32282	0.32282	0.32282	0.32282	0.32282	0.32282	0.32282	0.32282	0.32282	0.32282	0.32282	0.32282	0.32282	0.32282	0.32282	0.32282	0.32282	0.32282	0.32282	0.32282	0.32282	0.32282	0.32282	0.32282	0.32282	0.32282	0.32282	0.32282	0.32282	0.32282	0.32282	0.32282	0.32282	0.32282	0.32282	0.32282	0.32282	0.32282	0.32282	0.32282	0.32282
94	0.32297	0.32297	0.32297	0.32297	0.32297	0.32297	0.32297	0.32297	0.32297	0.32297	0.32297	0.32297	0.32297	0.32297	0.32297	0.32297	0.32297	0.32297	0.32297	0.32297	0.32297	0.32297	0.32297	0.32297	0.32297	0.32297	0.32297	0.32297	0.32297	0.32297	0.32297	0.32297	0.32297	0.32297	0.32297	0.32297	0.32297	0.32297	0.32297	0.32297	0.32297	0.32297	0.32297	0.32297	0.32297	0.32297	0.32297	0.32297	0.32297
95	0.32313	0.32313	0.32313	0.32313	0.32313	0.32313	0.32313	0.32313	0.32313	0.32313	0.32313	0.32313	0.32313	0.32313	0.32313	0.32313	0.32313	0.32313	0.32313	0.32313	0.32313	0.32313	0.32313	0.32313	0.32313	0.32313	0.32313	0.32313	0.32313	0.32313	0.32313	0.32313	0.32313	0.32313	0.32313	0.32313	0.32313	0.32313	0.32313	0.32313	0.32313	0.32313	0.32313	0.32313	0.32313	0.32313	0.32313	0.32313	0.32313
96	0.3233	0.3233	0.3233	0.3233	0.3233	0.3233	0.3233	0.3233	0.3233	0.3233	0.3233	0.3233	0.3233	0.3233	0.3233	0.3233	0.3233	0.3233	0.3233	0.3233	0.3233	0.3233	0.3233	0.3233	0.3233	0.3233	0.3233	0.3233	0.3233	0.3233	0.3233	0.3233	0.3233	0.3233	0.3233	0.3233	0.3233	0.3233	0.3233	0.3233	0.3233	0.3233	0.3233	0.3233	0.3233	0.3233	0.3233	0.3233	0.3233
97	0.32346	0.32346	0.32346	0.32346	0.32346	0.32346	0.32346	0.32346	0.32346	0.32346	0.32346	0.32346	0.32346	0.32346	0.32346	0.32346	0.32346	0.32346	0.32346	0.32346	0.32346	0.32346	0.32346	0.32346	0.32346	0.32346	0.32346	0.32346	0.32346	0.32346	0.32346	0.32346	0.32346	0.32346	0.32346	0.32346	0.32346	0.32346	0.32346	0.32346	0.32346	0.32346	0.32346	0.32346	0.32346	0.32346	0.32346	0.32346	0.32346
98	0.32361	0.32361	0.32361	0.32361	0.32361	0.32361	0.32361	0.32361	0.32361	0.32361	0.32361	0.32361	0.32361	0.32361	0.32361	0.32361	0.32361	0.32361	0.32361	0.32361	0.32361	0.32361	0.32361	0.32361	0.32361	0.32361	0.32361	0.32361	0.32361	0.32361	0.32361	0.32361	0.32361	0.32361	0.32361	0.32361	0.32361	0.32361	0.32361	0.32361	0.32361	0.32361	0.32361	0.32361	0.32361	0.32361	0.32361	0.32361	0.32361
99	0.32376	0.32376	0.32376	0.32376	0.32376	0.32376	0.32376	0.32376	0.32376	0.32376	0.32376	0.32376	0.32376	0.32376	0.32376	0.32376	0.32376	0.32376	0.32376	0.32376	0.32376	0.32376	0.32376	0.32376	0.32376	0.32376	0.32376	0.32376	0.32376	0.32376	0.32376	0.32376	0.32376	0.32376	0.32376	0.32376	0.32376	0.32376	0.32376	0.32376	0.32376	0.32376	0.32376	0.32376	0.32376	0.32376	0.32376	0.32376	0.32376
100	0.32391	0.32391	0.32391	0.32391	0.32391	0.32391	0.32391	0.32391	0.32391	0.32391	0.32391	0.32391	0.32391	0.32391	0.32391	0.32391	0.32391	0.32391	0.32391	0.32391	0.32391	0.32391	0.32391	0.32391	0.32391	0.32391	0.32391	0.32391	0.32391	0.32391	0.32391	0.32391	0.32391	0.32391	0.32391	0.32391	0.32391	0.32391	0.32391	0.32391	0.32391	0.32391	0.32391	0.32391	0.32391	0.32391	0.32391	0.32391	0.32391
101	0.32405	0.32405	0.32405	0.32405	0.32405	0.32405	0.32405	0.32405	0.32405	0.32405	0.32405	0.32405	0.32405	0.32405	0.32405	0.32405	0.32405	0.32405	0.32405	0.32405	0.32405	0.32405	0.32405	0.32405	0.32405	0.32405	0.32405	0.32405	0.32405	0.32405	0.32405	0.32405	0.32405	0.32405	0.32405	0.32405	0.32405	0.32405	0.32405	0.32405	0.32405	0.32405	0.32405	0.32405	0.32405	0.32405	0.32405	0.32405	0.32405
102	0.32418	0.32418	0.32418	0.32418	0.32418	0.32418	0.32418	0.32418	0.32418	0.32418	0.32418	0.32418	0.32418	0.32418	0.32418	0.32418	0.32418	0.32418	0.32418	0.32418	0.32418	0.32418	0.32418	0.32418	0.32418	0.32418	0.32418	0.32418	0.32418	0.32418	0.32418	0.32418	0.32418	0.32418	0.32418	0.32418	0.32418	0.32418	0.32418	0.32418	0.32418	0.32418	0.32418	0.32418	0.32418	0.32418	0.32418	0.32418	0.32418
103	0.32431	0.32431	0.32431	0.32431	0.32431	0.32431	0.32431	0.32431	0.32431	0.32431	0.32431	0.32431	0.32431	0.32431	0.32431	0.32431	0.32431	0.32431	0.32431	0.32431	0.32431	0.32431	0.32431	0.32431	0.32431	0.32431	0.32431	0.32431	0.32431	0.32431	0.32431	0.32431	0.32431	0.32431	0.32431	0.32431	0.32431	0.32431	0.32431	0.32431	0.32431	0.32431	0.32431	0.32431	0.32431	0.32431	0.32431	0.32431	0.32431
104	0.32443	0.32443	0.32443	0.32443	0.32443	0.32443	0.32443	0.32443	0.32443	0.32443	0.32443	0.32443	0.32443	0.32443	0.32443	0.32443	0.32443	0.32443	0.32443	0.32443	0.32443	0.32443	0.32443	0.32443	0.32443	0.32443	0.32443	0.32443	0.32443	0.32443	0.32443	0.32443	0.32443	0.32443	0.32443	0.32443	0.32443	0.32443	0.32443	0.32443	0.32443	0.32443	0.32443	0.32443	0.32443	0.32443	0.32443	0.32443	0.32443
105	0.32454	0.32454	0.32454	0.32454	0.32454	0.32454	0.32454	0.32454	0.32454	0.32454	0.32454	0.32454	0.32454	0.32454	0.32454	0.32454	0.32454	0.32454	0.32454	0.32454	0.32454	0.32454	0.32454	0.32454	0.32454	0.32454	0.32454	0.32454	0.32454	0.32454	0.32454	0.32454	0.32454	0.32454	0.32454	0.32454	0.32454	0.32454	0.32454	0.32454	0.32454	0.32454	0.32454	0.32454	0.32454	0.32454	0.32454	0.32454	0.32454
106	0.32464	0.32464	0.32464	0.32464	0.32464	0.32464	0.32464	0.32464	0.32464	0.32464	0.32464	0.32464	0.32464	0.32464	0.32464	0.32464	0.32464	0.32464	0.32464	0.32464	0.32464	0.32464	0.32464	0.32464	0.32464	0.32464	0.32464	0.32464	0.32464	0.32464	0.32464	0.32464	0.32464	0.32464	0.32464	0.32464	0.32464	0.32464	0.32464	0.32464	0.32464	0.32464	0.32464	0.32464	0.32464	0.32464	0.32464	0.32464	0.32464
107	0.32473	0.32473	0.32473	0.32473	0.32473	0.32473	0.32473	0.32473	0.32473	0.32473	0.32473	0.32473	0.32473	0.32473	0.32473	0.32473	0.32473	0.32473	0.32473	0.32473	0.32473	0.32473	0.32473	0.32473	0.32473	0.32473	0.32473	0.32473	0.32473	0.32473	0.32473	0.32473	0.32473	0.32473	0.32473	0.32473	0.32473	0.32473	0.32473	0.32473	0.32473	0.32473	0.32473	0.32473	0.32473	0.32473	0.32473	0.32473	0.32473
108	0.32481	0.32481	0.32481	0.32481	0.32481	0.32481	0.32481	0.32481	0.32481	0.32481	0.32481	0.32481	0.32481	0.32481	0.32481	0.32481	0.32481	0.32481	0.32481	0.32481	0.32481	0.32481	0.32481	0.32481	0.32481	0.32481	0.32481	0.32481	0.32481	0.32481	0.32481	0.32481	0.32481	0.32481	0.32481	0.32481	0.32481	0.32481	0.32481	0.32481	0.32481	0.32481	0.32481	0.32481	0.32481	0.32481	0.32481	0.32481	0.32481
109	0.32488	0.32488	0.32488	0.32488	0.32488	0.32488	0.32488	0.32488	0.32488	0.32488	0.32488	0.32488	0.32488	0.32488	0.32488	0.32488	0.32488	0.32488	0.32488	0.32488	0.32488	0.32488	0.32488	0.32488	0.32488	0.32488	0.32488	0.32488	0.32488	0.32488	0.32488	0.32488	0.32488	0.32488	0.32488	0.32488	0.32488	0.32488	0.32488	0.32488	0.32488	0.32488	0.32488	0.32488	0.32488	0.32488	0.32488	0.32488	0.32488
110	0.32494	0.32494	0.32494	0.32494	0.32494	0.32494	0.32494	0.32494	0.32494	0.32494	0.32494	0.32494	0.32494	0.32494	0.32494	0.32494	0.32494	0.32494	0.32494	0.32494	0.32494	0.32494	0.32494	0.32494	0.32494	0.32494	0.32494	0.32494	0.32494	0.32494	0.32494	0.32494	0.32494	0.32494	0.32494	0.32494	0.32494	0.32494	0.32494	0.32494	0.32494	0.32494	0.32494	0.32494	0.32494	0.32494	0.32494	0.32494	0.32494
111	0.32499	0.32499	0.32499	0.32499	0.32499	0.32499	0.32499	0.32499	0.32499	0.32499	0.32499	0.32499	0.32499	0.32499	0.32499	0.32499	0.32499	0.32499	0.32499	0.32499	0.32499	0.32499	0.32499	0.32499	0.32499	0.32499	0.32499	0.32499	0.32499	0.32499	0.32499	0.32499	0.32499	0.32499	0.32499	0.32499	0.32499	0.32499	0.32499	0.32499	0.32499	0.32499	0.32499	0.32499	0.32499	0.32499	0.32499	0.32499	0.32499
112	0.32503	0.32503	0.32503	0.32503	0.32503	0.32503	0.32503	0.32503	0.32503	0.32503	0.32503	0.32503	0.32503	0.32503	0.32503	0.32503	0.32503	0.32503	0.32503	0.32503	0.32503	0.32503	0.32503	0.32503	0.32503	0.32503	0.32503	0.32503	0.32503	0.32503	0.32503	0.32503	0.32503	0.32503	0.32503	0.32503	0.32503	0.32503	0.32503	0.32503	0.32503	0.32503	0.32503	0.32503	0.32503	0.32503	0.32503	0.32503	0.32503
113	0.32507	0.32507	0.32507	0.32507	0.32507	0.32507	0.32507	0.32507	0.32507	0.32507	0.32507	0.32507	0.32507	0.32507	0.32507	0.32507	0.32507	0.32507	0.32507	0.32507	0.32507	0.32507	0.32507	0.32507	0.32507	0.32507	0.32507	0.32507	0.32507	0.32507	0.32507	0.32507	0.32507	0.32507	0.32507	0.32507	0.32507	0.32507	0.32507	0.32507	0.32507	0.32507	0.32507	0.32507	0.32507	0.32507	0.32507	0.32507	0.32507
114	0.3251	0.3251	0.3251	0.3251	0.3251	0.3251	0.3251	0.3251	0.3251	0.3251	0.3251	0.3251	0.3251	0.3251	0.3251	0.3251	0.3251	0.3251	0.3251	0.3251	0.3251	0.3251	0.3251	0.3251	0.3251	0.3251	0.3251	0.3251	0.3251	0.3251	0.3251	0.3251	0.3251	0.3251	0.3251	0.3251	0.3251	0.3251	0.3251	0.3251	0.3251	0.3251	0.3251	0.3251	0.3251	0.3251	0.3251	0.3251	0.3251
115	0.32512	0.32512	0.32512	0.32512	0.32512	0.32512	0.32512	0.32512	0.32512	0.32512	0.32512	0.32512	0.32512	0.32512	0.32512	0.32512	0.32512	0.32512	0.32512	0.32512	0.32512	0.32512	0.32512	0.32512	0.32512	0.32512	0.32512	0.32512	0.32512	0.32512	0.32512	0.32512	0.32512	0.32512	0.32512	0.32512	0.32512	0.32512	0.32512	0.32512	0.32512	0.32512	0.32512	0.32512	0.32512	0.32512	0.32512	0.32512	0.32512
116	0.32513	0.32513	0.32513	0.32513	0.32513	0.32513	0.32513	0.32513	0.32513	0.32513	0.32513	0.32513	0.32513	0.32513	0.32513	0.32513	0.32513	0.32513	0.32513	0.32513	0.32513	0.32513	0.32513	0.32513	0.32513	0.32513	0.32513	0.32513	0.32513	0.32513	0.32513	0.32513	0.32513	0.32513	0.32513	0.32513	0.32513	0.32513	0.32513	0.32513	0.32513	0.32513	0.32513	0.32513	0.32513	0.32513	0.32513	0.32513	0.32513
117	0.32513	0.32513	0.32513	0.32513	0.32513	0.32513	0.32513	0.32513	0.32513	0.32513	0.32513	0.32513	0.32513	0.32513	0.32513	0.32513	0.32513	0.32513	0.32513	0.32513	0.32513	0.32513	0.32513	0.32513	0.32513	0.32513	0.32513	0.32513	0.32513	0.32513	0.32513	0.32513	0.32513	0.32513	0.32513	0.32513	0.32513	0.32513	0.32513	0.32513	0.32513	0.32513	0.32513	0.32513	0.32513	0.32513	0.32513	0.32513	0.32513
118	0.32513	0.32513	0.32513	0.32513	0.32513	0.32513	0.32513	0.32513	0.32513	0.32513	0.32513	0.32513	0.32513	0.32513	0.32513	0.32513	0.32513	0.32513	0.32513	0.32513	0.32513	0.32513	0.32513	0.32513	0.32513	0.32513	0.32513	0.32513	0.32513	0.32513	0.32513	0.32513	0.32513	0.32513	0.32513	0.32513	0.32513	0.32513	0.32513	0.32513	0.32513	0.32513	0.32513	0.32513	0.32513	0.32513	0.32513	0.32513	0.32513
119	0.32512	0.32512	0.32512	0.32512	0.32512	0.32512	0.32512	0.32512	0.32512	0.32512	0.32512	0.32512	0.32512	0.32512	0.32512	0.32512	0.32512	0.32512	0.32512	0.32512	0.32512	0.32512	0.32512	0.32512	0.32512	0.32512	0.32512	0.32512	0.32512	0.32512	0.32512	0.32512	0.32512	0.32512	0.32512	0.32512	0.32512	0.32512	0.32512	0.32512	0.32512	0.32512	0.32512	0.32512	0.32512	0.32512	0.32512	0.32512	0.32512
120	0.3251	0.3251	0.3251	0.3251	0.3251	0.3251	0.3251	0.3251	0.3251	0.3251	0.3251	0.3251	0.3251	0.3251	0.3251	0.3251	0.3251	0.3251	0.3251	0.3251	0.3251	0.3251	0.3251	0.3251	0.3251	0.3251	0.3251	0.3251	0.3251	0.3251	0.3251	0.3251	0.3251	0.3251	0.3251	0.3251	0.3251	0.3251	0.3251	0.3251	0.3251	0.3251	0.3251	0.3251	0.3251	0.3251	0.3251	0.3251	0.3251
121	0.32508	0.32508	0.32508	0.32508	0.32508	0.32508	0.32508	0.32508	0.32508	0.32508	0.32508	0.32508	0.32508	0.32508	0.32508	0.32508	0.32508	0.32508	0.32508	0.32508	0.32508	0.32508	0.32508	0.32508	0.32508	0.32508	0.32508	0.32508	0.32508	0.32508	0.32508	0.32508	0.32508	0.32508	0.32508	0.32508	0.32508	0.32508	0.32508	0.32508	0.32508	0.32508	0.32508	0.32508	0.32508	0.32508	0.32508	0.32508	0.32508
122	0.32506	0.32506	0.32506	0.32506	0.32506	0.32506	0.32506	0.32506	0.32506	0.32506	0.32506	0.32506	0.32506	0.32506	0.32506	0.32506	0.32506	0.32506	0.32506	0.32506	0.32506	0.32506	0.32506	0.32506	0.32506	0.32506	0.32506	0.32506	0.32506	0.32506	0.32506	0.32506	0.32506	0.32506	0.32506	0.32506	0.32506	0.32506	0.32506	0.32506	0.32506	0.32506	0.32506	0.32506	0.32506	0.32506	0.32506	0.32506	0.32506
123	0.32504	0.32504	0.32504	0.32504	0.32504	0.32504	0.32504	0.32504	0.32504	0.32504	0.32504	0.32504	0.32504	0.32504	0.32504	0.32504	0.32504	0.32504	0.32504	0.32504	0.32504	0.32504	0.32504	0.32504	0.32504	0.32504	0.32504	0.32504	0.32504	0.32504	0.32504	0.32504	0.32504	0.32504	0.32504	0.32504	0.32504	0.32504	0.32504	0.32504	0.32504	0.32504	0.32504	0.32504	0.32504	0.32504	0.32504	0.32504	0.32504
124	0.32501	0.32501	0.32501	0.32501	0.32501	0.32501	0.32501	0.32501	0.32501	0.32501	0.32501	0.32501	0.32501	0.32501	0.32501	0.32501	0.32501	0.32501	0.32501	0.32501	0.32501	0.32501	0.32501	0.32501	0.32501	0.32501	0.32501	0.32501	0.32501	0.32501	0.32501	0.32501	0.32501	0.32501	0.32501	0.32501	0.32501	0.32501	0.32501	0.32501	0.32501	0.32501	0.32501	0.32501	0.32501	0.32501	0.32501	0.32501	0.32501
125	0.32498	0.32498	0.32498	0.32498	0.32498	0.32498	0.32498	0.32498	0.32498	0.32498	0.32498	0.32498	0.32498	0.32498	0.32498	0.32498	0.32498	0.32498	0.32498	0.32498	0.32498	0.32498	0.32498	0.32498	0.32498	0.32498	0.32498	0.32498	0.32498	0.32498	0.32498	0.32498	0.32498	0.32498	0.32498	0.32498	0.32498	0.32498	0.32498	0.32498	0.32498	0.32498	0.32498	0.32498	0.32498	0.32498	0.32498	0.32498	0.32498
126	0.32494	0.32494	0.32494	0.32494	0.32494	0.32494	0.32494	0.32494	0.32494	0.32494	0.32494	0.32494	0.32494	0.32494	0.32494	0.32494	0.32494	0.32494	0.32494	0.32494	0.32494	0.32494	0.32494	0.32494	0.32494	0.32494	0.32494	0.32494	0.32494	0.32494	0.32494	0.32494	0.32494	0.32494	0.32494	0.32494	0.32494	0.32494	0.32494	0.32494	0.32494	0.32494	0.32494	0.32494	0.32494	0.32494	0.32494	0.32494	0.32494
127	0.32491	0.32491	0.32491	0.32491	0.32491	0.32491	0.32491	0.32491	0.32491	0.32491	0.32491	0.32491	0.32491	0.32491	0.32491	0.32491	0.32491	0.32491	0.32491	0.32491	0.32491	0.32491	0.32491	0.32491	0.32491	0.32491	0.32491	0.32491	0.32491	0.32491	0.32491	0.32491	0.32491	0.32491	0.32491	0.32491	0.32491	0.32491	0.32491	0.32491	0.32491	0.32491	0.32491	0.32491	0.32491	0.32491	0.32491	0.32491	0.32491
128	0.32487	0.32487	0.32487	0.32487	0.32487	0.32487	0.32487	0.32487	0.32487	0.32487	0.32487	0.32487	0.32487	0.32487	0.32487	0.32487	0.32487	0.32487	0.32487	0.32487	0.32487	0.32487	0.32487	0.32487	0.32487	0.32487	0.32487	0.32487	0.32487	0.32487	0.32487	0.32487	0.32487	0.32487	0.32487	0.32487	0.32487	0.32487	0.32487	0.32487	0.32487	0.32487	0.32487	0.32487	0.32487	0.32487	0.32487	0.32487	0.32487
129	0.32484	0.32484	0.32484	0.32484	0.32484	0.32484	0.32484	0.32484	0.32484	0.32484	0.32484	0.32484	0.32484	0.32484	0.32484	0.32484	0.32484	0.32484	0.32484	0.32484	0.32484	0.32484	0.32484	0.32484	0.32484	0.32484	0.32484	0.32484	0.32484	0.32484	0.32484	0.32484	0.32484	0.32484	0.32484	0.32484	0.32484	0.32484	0.32484	0.32484	0.32484	0.32484	0.32484	0.32484	0.32484	0.32484	0.32484	0.32484	0.32484
130	0.32481	0.32481	0.32481	0.32481	0.32481	0.32481	0.32481	0.32481	0.32481	0.32481	0.32481	0.32481	0.32481	0.32481	0.32481	0.32481	0.32481	0.32481	0.32481	0.32481	0.32481	0.32481	0.32481	0.32481	0.32481	0.32481	0.32481	0.32481	0.32481	0.32481	0.32481	0.32481	0.32481	0.32481	0.32481	0.32481	0.32481	0.32481	0.32481	0.32481	0.32481	0.32481	0.32481	0.32481	0.32481	0.32481	0.32481	0.32481	0.32481
131	0.32478	0.32478	0.32478	0.32478	0.32478	0.32478	0.32478	0.32478	0.32478	0.32478	0.32478	0.32478	0.32478	0.32478	0.32478	0.32478	0.32478	0.32478	0.32478	0.32478	0.32478	0.32478	0.32478	0.32478	0.32478	0.32478	0.32478	0.32478	0.32478	0.32478	0.32478	0.32478	0.32478	0.32478	0.32478	0.32478	0.32478	0.32478	0.32478	0.32478	0.32478	0.32478	0.32478	0.32478	0.32478	0.32478	0.32478	0.32478	0.32478
132	0.32474	0.32474	0.32474	0.32474	0.32474	0.32474	0.32474	0.32474	0.32474	0.32474	0.32474	0.32474	0.32474	0.32474	0.32474	0.32474	0.32474	0.32474	0.32474	0.32474	0.32474	0.32474	0.32474	0.32474	0.32474	0.32474	0.32474	0.32474	0.32474	0.32474	0.32474	0.32474	0.32474	0.32474	0.32474	0.32474	0.32474	0.32474	0.32474	0.32474	0.32474	0.32474	0.32474	0.32474	0.32474	0.32474	0.32474	0.32474	0.32474
133	0.32471	0.32471	0.32471	0.32471	0.32471	0.32471	0.32471	0.32471	0.32471	0.32471	0.32471	0.32471	0.32471	0.32471	0.32471	0.32471	0.32471	0.32471	0.32471	0.32471	0.32471	0.32471	0.32471	0.32471	0.32471	0.32471	0.32471	0.32471	0.32471	0.32471	0.32471	0.32471	0.32471	0.32471	0.32471	0.32471	0.32471	0.32471	0.32471	0.32471	0.32471	0.32471	0.32471	0.32471	0.32471	0.32471	0.32471	0.32471	0.32471
134	0.32468	0.32468	0.32468	0.32468	0.32468	0.32468	0.32468	0.32468	0.32468	0.32468	0.32468	0.32468	0.32468	0.32468	0.32468	0.32468	0.32468	0.32468	0.32468	0.32468	0.32468	0.32468	0.32468	0.32468	0.32468	0.32468	0.32468	0.32468	0.32468	0.32468	0.32468	0.32468	0.32468	0.32468	0.32468	0.32468	0.32468	0.32468	0.32468	0.32468	0.32468	0.32468	0.32468	0.32468	0.32468	0.32468	0.32468	0.32468	0.32468
135	0.32465	0.32465	0.32465	0.32465	0.32465	0.32465	0.32465	0.32465	0.32465	0.32465	0.32465	0.32465	0.32465	0.32465	0.32465	0.32465	0.32465	0.32465	0.32465	0.32465	0.32465	0.32465	0.32465	0.32465	0.32465	0.32465	0.32465	0.32465	0.32465	0.32465	0.32465	0.32465	0.32465	0.32465	0.32465	0.32465	0.32465	0.32465	0.32465	0.32465	0.32465	0.32465	0.32465	0.32465	0.32465	0.32465	0.32465	0.32465	0.32465
136	0.32463	0.32463	0.32463	0.32463	0.32463	0.32463	0.32463	0.32463	0.32463	0.32463	0.32463	0.32463	0.32463	0.32463	0.32463	0.32463	0.32463	0.32463	0.32463	0.32463	0.32463	0.32463	0.32463	0.32463	0.32463	0.32463	0.32463	0.32463	0.32463	0.32463	0.32463	0.32463	0.32463	0.32463	0.32463	0.32463	0.32463	0.32463	0.32463	0.32463	0.32463	0.32463	0.32463	0.32463	0.32463	0.32463	0.32463	0.32463	0.32463
137	0.3246	0.3246	0.3246	0.3246	0.3246	0.3246	0.3246	0.3246	0.3246	0.3246	0.3246	0.3246	0.3246	0.3246	0.3246	0.3246	0.3246	0.3246	0.3246	0.3246	0.3246	0.3246	0.3246	0.3246	0.3246	0.3246	0.3246	0.3246	0.3246	0.3246	0.3246	0.3246	0.3246	0.3246	0.3246	0.3246	0.3246	0.3246	0.3246	0.3246	0.3246	0.3246	0.3246	0.3246	0.3246	0.3246	0.3246	0.3246	0.3246
138	0.32458	0.32458	0.32458	0.32458	0.32458	0.32458	0.32458	0.32458	0.32458	0.32458	0.32458	0.32458	0.32458	0.32458	0.32458	0.32458	0.32458	0.32458	0.32458	0.32458	0.32458	0.32458	0.32458	0.32458	0.32458	0.32458	0.32458	0.32458	0.32458	0.32458	0.32458	0.32458	0.32458	0.32458	0.32458	0.32458	0.32458	0.32458	0.32458	0.32458	0.32458	0.32458	0.32458	0.32458	0.32458	0.32458	0.32458	0.32458	0.32458
139	0.32456	0.32456	0.32456	0.32456	0.32456	0.32456	0.32456	0.32456	0.32456	0.32456	0.32456	0.32456	0.32456	0.32456	0.32456	0.32456	0.32456	0.32456	0.32456	0.32456	0.32456	0.32456	0.32456	0.32456	0.32456	0.32456	0.32456	0.32456	0.32456	0.32456	0.32456	0.32456	0.32456	0.32456	0.32456	0.32456	0.32456	0.32456	0.32456	0.32456	0.32456	0.32456	0.32456	0.32456	0.32456	0.32456	0.32456	0.32456	0.32456
140	0.32455	0.32455	0.32455	0.32455	0.32455	0.32455	0.32455	0.32455	0.32455	0.32455	0.32455	0.32455	0.32455	0.32455	0.32455	0.32455	0.32455	0.32455	0.32455	0.32455	0.32455	0.32455	0.32455	0.32455	0.32455	0.32455	0.32455	0.32455	0.32455	0.32455	0.32455	0.32455	0.32455	0.32455	0.32455	0.32455	0.32455	0.32455	0.32455	0.32455	0.32455	0.32455	0.32455	0.32455	0.32455	0.32455	0.32455	0.32455	0.32455
141	0.32453	0.32453	0.32453	0.32453	0.32453	0.32453	0.32453	0.32453	0.32453	0.32453	0.32453	0.32453	0.32453	0.32453	0.32453	0.32453	0.32453	0.32453	0.32453	0.32453	0.32453	0.32453	0.32453	0.32453	0.32453	0.32453	0.32453	0.32453	0.32453	0.32453	0.32453	0.32453	0.32453	0.32453	0.32453	0.32453	0.32453	0.32453	0.32453	0.32453	0.32453	0.32453	0.32453	0.32453	0.32453	0.32453	0.32453	0.32453	0.32453
142	0.32452	0.32452	0.32452	0.32452	0.32452	0.32452	0.32452	0.32452	0.32452	0.32452	0.32452	0.32452	0.32452	0.32452	0.32452	0.32452	0.32452	0.32452	0.32452	0.32452	0.32452	0.32452	0.32452	0.32452	0.32452	0.32452	0.32452	0.32452	0.32452	0.32452	0.32452	0.32452	0.32452	0.32452	0.32452	0.32452	0.32452	0.32452	0.32452	0.32452	0.32452	0.32452	0.32452	0.32452	0.32452	0.32452	0.32452	0.32452	0.32452
143	0.32451	0.32451	0.32451	0.32451	0.32451	0.32451	0.32451	0.32451	0.32451	0.32451	0.32451	0.32451	0.32451	0.32451	0.32451	0.32451	0.32451	0.32451	0.32451	0.32451	0.32451	0.32451	0.32451	0.32451	0.32451	0.32451	0.32451	0.32451	0.32451	0.32451	0.32451	0.32451	0.32451	0.32451	0.32451	0.32451	0.32451	0.32451	0.32451	0.32451	0.32451	0.32451	0.32451	0.32451	0.32451	0.32451	0.32451	0.32451	0.32451
144	0.3245	0.3245	0.3245	0.3245	0.3245	0.3245	0.3245	0.3245	0.3245	0.3245	0.3245	0.3245	0.3245	0.3245	0.3245	0.3245	0.3245	0.3245	0.3245	0.3245	0.3245	0.3245	0.3245	0.3245	0.3245	0.3245	0.3245	0.3245	0.3245	0.3245	0.3245	0.3245	0.3245	0.3245	0.3245	0.3245	0.3245	0.3245	0.3245	0.3245	0.3245	0.3245	0.3245	0.3245	0.3245	0.3245	0.3245	0.3245	0.3245
145	0.32449	0.32449	0.32449	0.32449	0.32449	0.32449	0.32449	0.32449	0.32449	0.32449	0.32449	0.32449	0.32449	0.32449	0.32449	0.32449	0.32449	0.32449	0.32449	0.32449	0.32449	0.32449	0.32449	0.32449	0.32449	0.32449	0.32449	0.32449	0.32449	0.32449	0.32449	0.32449	0.32449	0.32449	0.32449	0.32449	0.32449	0.32449	0.32449	0.32449	0.32449	0.32449	0.32449	0.32449	0.32449	0.32449	0.32449	0.32449	0.32449
146	0.32449	0.32449	0.32449	0.32449	0.32449	0.32449	0.32449	0.32449	0.32449	0.32449	0.32449	0.32449	0.32449	0.32449	0.32449	0.32449	0.32449	0.32449	0.32449	0.32449	0.32449	0.32449	0.32449	0.32449	0.32449	0.32449	0.32449	0.32449	0.32449	0.32449	0.32449	0.32449	0.32449	0.32449	0.32449	0.32449	0.32449	0.32449	0.32449	0.32449	0.32449	0.32449	0.32449	0.32449	0.32449	0.32449	0.32449	0.32449	0.32449
147	0.32448	0.32448	0.32448	0.32448	0.32448	0.32448	0.32448	0.32448	0.32448	0.32448	0.32448	0.32448	0.32448	0.32448	0.32448	0.32448	0.32448	0.32448	0.32448	0.32448	0.32448	0.32448	0.32448	0.32448	0.32448	0.32448	0.32448	0.32448	0.32448	0.32448	0.32448	0.32448	0.32448	0.32448	0.32448	0.32448	0.32448	0.32448	0.32448	0.32448	0.32448	0.32448	0.32448	0.32448	0.32448	0.32448	0.32448	0.32448	0.32448
148	0.32448	0.32448	0.32448	0.32448	0.32448	0.32448	0.32448	0.32448	0.32448	0.32448	0.32448	0.32448	0.32448	0.32448	0.32448	0.32448	0.32448	0.32448	0.32448	0.32448	0.32448	0.32448	0.32448	0.32448	0.32448	0.32448	0.32448	0.32448	0.32448	0.32448	0.32448	0.32448	0.32448	0.32448	0.32448	0.32448	0.32448	0.32448	0.32448	0.32448	0.32448	0.32448	0.32448	0.32448	0.32448	0.32448	0.32448	0.32448	0.32448
149	0.32448	0.32448	0.32448	0.32448	0.32448	0.32448	0.32448	0.32448	0.32448	0.32448	0.32448	0.32448	0.32448	0.32448	0.32448	0.32448	0.32448	0.32448	0.32448	0.32448	0.32448	0.32448	0.32448	0.32448	0.32448	0.32448	0.32448	0.32448	0.32448	0.32448	0.32448	0.32448	0.32448	0.32448	0.32448	0.32448	0.32448	0.32448	0.32448	0.32448	0.32448	0.32448	0.32448	0.32448	0.32448	0.32448	0.32448	0.32448	0.32448
150	0.32449	0.32449	0.32449	0.32449	0.32449	0.32449	0.32449	0.32449	0.32449	0.32449	0.32449	0.32449	0.32449	0.32449	0.32449	0.32449	0.32449	0.32449	0.32449	0.32449	0.32449	0.32449	0.32449	0.32449	0.32449	0.32449	0.32449	0.32449	0.32449	0.32449	0.32449	0.32449	0.32449	0.32449	0.32449	0.32449	0.32449	0.32449	0.32449	0.32449	0.32449	0.32449	0.32449	0.32449	0.32449	0.32449	0.32449	0.32449	0.32449
151	0.32449	0.32449	0.32449	0.32449	0.32449	0.32449	0.32449	0.32449	0.32449	0.32449	0.32449	0.32449	0.32449	0.32449	0.32449	0.32449	0.32449	0.32449	0.32449	0.32449	0.32449	0.32449	0.32449	0.32449	0.32449	0.32449	0.32449	0.32449	0.32449	0.32449	0.32449	0.32449	0.32449	0.32449	0.32449	0.32449	0.32449	0.32449	0.32449	0.32449	0.32449	0.32449	0.32449	0.32449	0.32449	0.32449	0.32449	0.32449	0.32449
152	0.32449	0.32449	0.32449	0.32449	0.32449	0.32449	0.32449	0.32449	0.32449	0.32449	0.32449	0.32449	0.32449	0.32449	0.32449	0.32449	0.32449	0.32449	0.32449	0.32449	0.32449	0.32449	0.32449	0.32449	0.32449	0.32449	0.32449	0.32449	0.32449	0.32449	0.32449	0.32449	0.32449	0.32449	0.32449	0.32449	0.32449	0.32449	0.32449	0.32449	0.32449	0.32449	0.32449	0.32449	0.32449	0.32449	0.32449	0.32449	0.32449
153	0.3245	0.3245	0.3245	0.3245	0.3245	0.3245	0.3245	0.3245	0.3245	0.3245	0.3245	0.3245	0.3245	0.3245	0.3245	0.3245	0.3245	0.3245	0.3245	0.3245	0.3245	0.3245	0.3245	0.3245	0.3245	0.3245	0.3245	0.3245	0.3245	0.3245	0.3245	0.3245	0.3245	0.3245	0.3245	0.3245	0.3245	0.3245	0.3245	0.3245	0.3245	0.3245	0.3245	0.3245	0.3245	0.3245	0.3245	0.3245	0.3245
154	0.3245	0.3245	0.3245	0.3245	0.3245	0.3245	0.3245	0.3245	0.3245	0.3245	0.3245	0.3245	0.3245	0.3245	0.3245	0.3245	0.3245	0.3245	0.3245	0.3245	0.3245	0.3245	0.3245	0.3245	0.3245	0.3245	0.3245	0.3245	0.3245	0.3245	0.3245	0.3245	0.3245	0.3245	0.3245	0.3245	0.3245	0.3245	0.3245	0.3245	0.3245	0.3245	0.3245	0.3245	0.3245	0.3245	0.3245	0.3245	0.3245
155	0.32451	0.32451	0.32451	0.32451	0.32451	0.32451	0.32451	0.32451	0.32451	0.32451	0.32451	0.32451	0.32451	0.32451	0.32451	0.32451	0.32451	0.32451	0.32451	0.32451	0.32451	0.32451	0.32451	0.32451	0.32451	0.32451	0.32451	0.32451	0.32451	0.32451	0.32451	0.32451	0.32451	0.32451	0.32451	0.32451	0.32451	0.32451	0.32451	0.32451	0.32451	0.32451	0.32451	0.32451	0.32451	0.32451	0.32451	0.32451	0.32451
156	0.32451	0.32451	0.32451	0.32451	0.32451	0.32451	0.32451	0.32451	0.32451	0.32451	0.32451	0.32451	0.32451	0.32451	0.32451	0.32451	0.32451	0.32451	0.32451	0.32451	0.32451	0.32451	0.32451	0.32451	0.32451	0.32451	0.32451	0.32451	0.32451	0.32451	0.32451	0.32451	0.32451	0.32451	0.32451	0.32451	0.32451	0.32451	0.32451	0.32451	0.32451	0.32451	0.32451	0.32451	0.32451	0.32451	0.32451	0.32451	0.32451
157	0.32452	0.32452	0.32452	0.32452	0.32452	0.32452	0.32452	0.32452	0.32452	0.32452	0.32452	0.32452	0.32452	0.32452	0.32452	0.32452	0.32452	0.32452	0.32452	0.32452	0.32452	0.32452	0.32452	0.32452	0.32452	0.32452	0.32452	0.32452	0.32452	0.32452	0.32452	0.32452	0.32452	0.32452	0.32452	0.32452	0.32452	0.32452	0.32452	0.32452	0.32452	0.32452	0.32452	0.32452	0.32452	0.32452	0.32452	0.32452	0.32452
158	0.32453	0.32453	0.32453	0.32453	0.32453	0.32453	0.32453	0.32453	0.32453	0.32453	0.32453	0.32453	0.32453	0.32453	0.32453	0.32453	0.32453	0.32453	0.32453	0.32453	0.32453	0.32453	0.32453	0.32453	0.32453	0.32453	0.32453	0.32453	0.32453	0.32453	0.32453	0.32453	0.32453	0.32453	0.32453	0.32453	0.32453	0.32453	0.32453	0.32453	0.32453	0.32453	0.32453	0.32453	0.32453	0.32453	0.32453	0.32453	0.32453
159	0.32453	0.32453	0.32453	0.32453	0.32453	0.32453	0.32453	0.32453	0.32453	0.32453	0.32453	0.32453	0.32453	0.32453	0.32453	0.32453	0.32453	0.32453	0.32453	0.32453	0.32453	0.32453	0.32453	0.32453	0.32453	0.32453	0.32453	0.32453	0.32453	0.32453	0.32453	0.32453	0.32453	0.32453	0.32453	0.32453	0.32453	0.32453	0.32453	0.32453	0.32453	0.32453	0.32453	0.32453	0.32453	0.32453	0.32453	0.32453	0.32453
160	0.32454	0.32454	0.32454	0.32454	0.32454	0.32454	0.32454	0.32454	0.32454	0.32454	0.32454	0.32454	0.32454	0.32454	0.32454	0.32454	0.32454	0.32454	0.32454	0.32454	0.32454	0.32454	0.32454	0.32454	0.32454	0.32454	0.32454	0.32454	0.32454	0.32454	0.32454	0.32454	0.32454	0.32454	0.32454	0.32454	0.32454	0.32454	0.32454	0.32454	0.32454	0.32454	0.32454	0.32454	0.32454	0.32454	0.32454	0.32454	0.32454
161	0.32455	0.32455	0.32455	0.32455	0.32455	0.32455	0.32455	0.32455	0.32455	0.32455	0.32455	0.32455	0.32455	0.32455	0.32455	0.32455	0.32455	0.32455	0.32455	0.32455	0.32455	0.32455	0.32455	0.32455	0.32455	0.32455	0.32455	0.32455	0.32455	0.32455	0.32455	0.32455	0.32455	0.32455	0.32455	0.32455	0.32455	0.32455	0.32455	0.32455	0.32455	0.32455	0.32455	0.32455	0.32455	0.32455	0.32455	0.32455	0.32455
162	0.32455	0.32455	0.32455	0.32455	0.32455	0.32455	0.32455	0.32455	0.32455	0.32455	0.32455	0.32455	0.32455	0.32455	0.32455	0.32455	0.32455	0.32455	0.32455	0.32455	0.32455	0.32455	0.32455	0.32455	0.32455	0.32455	0.32455	0.32455	0.32455	0.32455	0.32455	0.32455	0.32455	0.32455	0.32455	0.32455	0.32455	0.32455	0.32455	0.32455	0.32455	0.32455	0.32455	0.32455	0.32455	0.32455	0.32455	0.32455	0.32455
163	0.32456	0.32456	0.32456	0.32456	0.32456	0.32456	0.32456	0.32456	0.32456	0.32456	0.32456	0.32456	0.32456	0.32456	0.32456	0.32456	0.32456	0.32456	0.32456	0.32456	0.32456	0.32456	0.32456	0.32456	0.32456	0.32456	0.32456	0.32456	0.32456	0.32456	0.32456	0.32456	0.32456	0.32456	0.32456	0.32456	0.32456	0.32456	0.32456	0.32456	0.32456	0.32456	0.32456	0.32456	0.32456	0.32456	0.32456	0.32456	0.32456
164	0.32456	0.32456	0.32456	0.32456	0.32456	0.32456	0.32456	0.32456	0.32456	0.32456	0.32456	0.32456	0.32456	0.32456	0.32456	0.32456	0.32456	0.32456	0.32456	0.32456	0.32456	0.32456	0.32456	0.32456	0.32456	0.32456	0.32456	0.32456	0.32456	0.32456	0.32456	0.32456	0.32456	0.32456	0.32456	0.32456	0.32456	0.32456	0.32456	0.32456	0.32456	0.32456	0.32456	0.32456	0.32456	0.32456	0.32456	0.32456	0.32456
165	0.32457	0.32457	0.32457	0.32457	0.32457	0.32457	0.32457	0.32457	0.32457	0.32457	0.32457	0.32457	0.32457	0.32457	0.32457	0.32457	0.32457	0.32457	0.32457	0.32457	0.32457	0.32457	0.32457	0.32457	0.32457	0.32457	0.32457	0.32457	0.32457	0.32457	0.32457	0.32457	0.32457	0.32457	0.32457	0.32457	0.32457	0.32457	0.32457	0.32457	0.32457	0.32457	0.32457	0.32457	0.32457	0.32457	0.32457	0.32457	0.32457
166	0.32457	0.32457	0.32457	0.32457	0.32457	0.32457	0.32457	0.32457	0.32457	0.32457	0.32457	0.32457	0.32457	0.32457	0.32457	0.32457	0.32457	0.32457	0.32457	0.32457	0.32457	0.32457	0.32457	0.32457	0.32457	0.32457	0.32457	0.32457	0.32457	0.32457	0.32457	0.32457	0.32457	0.32457	0.32457	0.32457	0.32457	0.32457	0.32457	0.32457	0.32457	0.32457	0.32457	0.32457	0.32457	0.32457	0.32457	0.32457	0.32457
167	0.32457	0.32457	0.32457	0.32457	0.32457	0.32457	0.32457	0.32457	0.32457	0.32457	0.32457	0.32457	0.32457	0.32457	0.32457	0.32457	0.32457	0.32457	0.32457	0.32457	0.32457	0.32457	0.32457	0.32457	0.32457	0.32457	0.32457	0.32457	0.32457	0.32457	0.32457	0.32457	0.32457	0.32457	0.32457	0.32457	0.32457	0.32457	0.32457	0.32457	0.32457	0.32457	0.32457	0.32457	0.32457	0.32457	0.32457	0.32457	0.32457
168	0.32458	0.32458	0.32458	0.32458	0.32458	0.32458	0.32458	0.32458	0.32458	0.32458	0.32458	0.32458	0.32458	0.32458	0.32458	0.32458	0.32458	0.32458	0.32458	0.32458	0.32458	0.32458	0.32458	0.32458	0.32458	0.32458	0.32458	0.32458	0.32458	0.32458	0.32458	0.32458	0.32458	0.32458	0.32458	0.32458	0.32458	0.32458	0.32458	0.32458	0.32458	0.32458	0.32458	0.32458	0.32458	0.32458	0.32458	0.32458	0.32458
169	0.32458	0.32458	0.32458	0.32458	0.32458	0.32458	0.32458	0.32458	0.32458	0.32458	0.32458	0.32458	0.32458	0.32458	0.32458	0.32458	0.32458	0.32458	0.32458	0.32458	0.32458	0.32458	0.32458	0.32458	0.32458	0.32458	0.32458	0.32458	0.32458	0.32458	0.32458	0.32458	0.32458	0.32458	0.32458	0.32458	0.32458	0.32458	0.32458	0.32458	0.32458	0.32458	0.32458	0.32458	0.32458	0.32458	0.32458	0.32458	0.32458
170	0.32458	0.32458	0.32458	0.32458	0.32458	0.32458	0.32458	0.32458	0.32458	0.32458	0.32458	0.32458	0.32458	0.32458	0.32458	0.32458	0.32458	0.32458	0.32458	0.32458	0.32458	0.32458	0.32458	0.32458	0.32458	0.32458	0.32458	0.32458	0.32458	0.32458	0.32458	0.32458	0.32458	0.32458	0.32458	0.32458	0.32458	0.32458	0.32458	0.32458	0.32458	0.32458	0.32458	0.32458	0.32458	0.32458	0.32458	0.32458	0.32458
171	0.32458	0.32458	0.32458	0.32458	0.32458	0.32458	0.32458	0.32458	0.32458	0.32458	0.32458	0.32458	0.32458	0.32458	0.32458	0.32458	0.32458	0.32458	0.32458	0.32458	0.32458	0.32458	0.32458	0.32458	0.32458	0.32458	0.32458	0.32458	0.32458	0.32458	0.32458	0.32458	0.32458	0.32458	0.32458	0.32458	0.32458	0.32458	0.32458	0.32458	0.32458	0.32458	0.32458	0.32458	0.32458	0.32458	0.32458	0.32458	0.32458
172	0.32458	0.32458	0.32458	0.32458	0.32458	0.32458	0.32458	0.32458	0.32458	0.32458	0.32458	0.32458	0.32458	0.32458	0.32458	0.32458	0.32458	0.32458	0.32458	0.32458	0.32458	0.32458	0.32458	0.32458	0.32458	0.32458	0.32458	0.32458	0.32458	0.32458	0.32458	0.32458	0.32458	0.32458	0.32458	0.32458	0.32458	0.32458	0.32458	0.32458	0.32458	0.32458	0.32458	0.32458	0.32458	0.32458	0.32458	0.32458	0.32458
173	0.32458	0.32458	0.32458	0.32458	0.32458	0.32458	0.32458	0.32458	0.32458	0.32458	0.32458	0.32458	0.32458	0.32458	0.32458	0.32458	0.32458	0.32458	0.32458	0.32458	0.32458	0.32458	0.32458	0.32458	0.32458	0.32458	0.32458	0.32458	0.32458	0.32458	0.32458	0.32458	0.32458	0.32458	0.32458	0.32458	0.32458	0.32458	0.32458	0.32458	0.32458	0.32458	0.32458	0.32458	0.32458	0.32458	0.32458	0.32458	0.32458
174	0.32458	0.32458	0.32458	0.32458	0.32458	0.32458	0.32458	0.32458	0.32458	0.32458	0.32458	0.32458	0.32458	0.32458	0.32458	0.32458	0.32458	0.32458	0.32458	0.32458	0.32458	0.32458	0.32458	0.32458	0.32458	0.32458	0.32458	0.32458	0.32458	0.32458	0.32458	0.32458	0.32458	0.32458	0.32458	0.32458	0.32458	0.32458	0.32458	0.32458	0.32458	0.32458	0.32458	0.32458	0.32458	0.32458	0.32458	0.32458	0.32458
175	0.32458	0.32458	0.32458	0.32458	0.32458	0.32458	0.32458	0.32458	0.32458	0.32458	0.32458	0.32458	0.32458	0.32458	0.32458	0.32458	0.32458	0.32458	0.32458	0.32458	0.32458	0.32458	0.32458	0.32458	0.32458	0.32458	0.32458	0.32458	0.32458	0.32458	0.32458	0.32458	0.32458	0.32458	0.32458	0.32458	0.32458	0.32458	0.32458	0.32458	0.32458	0.32458	0.32458	0.32458	0.32458	0.32458	0.32458	0.32458	0.32458
176	0.32458	0.32458	0.32458	0.32458	0.32458	0.32458	0.32458	0.32458	0.32458	0.32458	0.32458	0.32458	0.32458	0.32458	0.32458	0.32458	0.32458	0.32458	0.32458	0.32458	0.32458	0.32458	0.32458	0.32458	0.32458	0.32458	0.32458	0.32458	0.32458	0.32458	0.32458	0.32458	0.32458	0.32458	0.32458	0.32458	0.32458	0.32458	0.32458	0.32458	0.32458	0.32458	0.32458	0.32458	0.32458	0.32458	0.32458	0.32458	0.32458
177	0.32457	0.32457	0.32457	0.32457	0.32457	0.32457	0.32457	0.32457	0.32457	0.32457	0.32457	0.32457	0.32457	0.32457	0.32457	0.32457	0.32457	0.32457	0.32457	0.32457	0.32457	0.32457	0.32457	0.32457	0.32457	0.32457	0.32457	0.32457	0.32457	0.32457	0.32457	0.32457	0.32457	0.32457	0.32457	0.32457	0.32457	0.32457	0.32457	0.32457	0.32457	0.32457	0.32457	0.32457	0.32457	0.32457	0.32457	0.32457	0.32457
178	0.32457	0.32457	0.32457	0.32457	0.32457	0.32457	0.32457	0.32457	0.32457	0.32457	0.32457	0.32457	0.32457	0.32457	0.32457	0.32457	0.32457	0.32457	0.32457	0.32457	0.32457	0.32457	0.32457	0.32457	0.32457	0.32457	0.32457	0.32457	0.32457	0.32457	0.32457	0.32457	0.32457	0.32457	0.32457	0.32457	0.32457	0.32457	0.32457	0.32457	0.32457	0.32457	0.32457	0.32457	0.32457	0.32457	0.32457	0.32457	0.32457
179	0.32457	0.32457	0.32457	0.32457	0.32457	0.32457	0.32457	0.32457	0.32457	0.32457	0.32457	0.32457	0.32457	0.32457	0.32457	0.32457	0.32457	0.32457	0.32457	0.32457	0.32457	0.32457	0.32457	0.32457	0.32457	0.32457	0.32457	0.32457	0.32457	0.32457	0.32457	0.32457	0.32457	0.32457	0.32457	0.32457	0.32457	0.32457	0.32457	0.32457	0.32457	0.32457	0.32457	0.32457	0.32457	0.32457	0.32457	0.32457	0.32457
180	0.32457	0.32457	0.32457	0.32457	0.32457	0.32457	0.32457	0.32457	0.32457	0.32457	0.32457	0.32457	0.32457	0.32457	0.32457	0.32457	0.32457	0.32457	0.32457	0.32457	0.32457	0.32457	0.32457	0.32457	0.32457	0.32457	0.32457	0.32457	0.32457	0.32457	0.32457	0.32457	0.32457	0.32457	0.32457	0.32457	0.32457	0.32457	0.32457	0.32457	0.32457	0.32457	0.32457	0.32457	0.32457	0.32457	0.32457	0.32457	0.32457
181	0.32456	0.32456	0.32456	0.32456	0.32456	0.32456	0.32456	0.32456	0.32456	0.32456	0.32456	0.32456	0.32456	0.32456	0.32456	0.32456	0.32456	0.32456	0.32456	0.32456	0.32456	0.32456	0.32456	0.32456	0.32456	0.32456	0.32456	0.32456	0.32456	0.32456	0.32456	0.32456	0.32456	0.32456	0.32456	0.32456	0.32456	0.32456	0.32456	0.32456	0.32456	0.32456	0.32456	0.32456	0.32456	0.32456	0.32456	0.32456	0.32456
182	0.32456	0.32456	0.32456	0.32456	0.32456	0.32456	0.32456	0.32456	0.32456	0.32456	0.32456	0.32456	0.32456	0.32456	0.32456	0.32456	0.32456	0.32456	0.32456	0.32456	0.32456	0.32456	0.32456	0.32456	0.32456	0.32456	0.32456	0.32456	0.32456	0.32456	0.32456	0.32456	0.32456	0.32456	0.32456	0.32456	0.32456	0.32456	0.32456	0.32456	0.32456	0.32456	0.32456	0.32456	0.32456	0.32456	0.32456	0.32456	0.32456
183	0.32456	0.32456	0.32456	0.32456	0.32456	0.32456	0.32456	0.32456	0.32456	0.32456	0.32456	0.32456	0.32456	0.32456	0.32456	0.32456	0.32456	0.32456	0.32456	0.32456	0.32456	0.32456	0.32456	0.32456	0.32456	0.32456	0.32456	0.32456	0.32456	0.32456	0.32456	0.32456	0.32456	0.32456	0.32456	0.32456	0.32456	0.32456	0.32456	0.32456	0.32456	0.32456	0.32456	0.32456	0.32456	0.32456	0.32456	0.32456	0.32456
184	0.32455	0.32455	0.32455	0.32455	0.32455	0.32455	0.32455	0.32455	0.32455	0.32455	0.32455	0.32455	0.32455	0.32455	0.32455	0.32455	0.32455	0.32455	0.32455	0.32455	0.32455	0.32455	0.32455	0.32455	0.32455	0.32455	0.32455	0.32455	0.32455	0.32455	0.32455	0.32455	0.32455	0.32455	0.32455	0.32455	0.32455	0.32455	0.32455	0.32455	0.32455	0.32455	0.32455	0.32455	0.32455	0.32455	0.32455	0.32455	0.32455
185	0.32455	0.32455	0.32455	0.32455	0.32455	0.32455	0.32455	0.32455	0.32455	0.32455	0.32455	0.32455	0.32455	0.32455	0.32455	0.32455	0.32455	0.32455	0.32455	0.32455	0.32455	0.32455	0.32455	0.32455	0.32455	0.32455	0.32455	0.32455	0.32455	0.32455	0.32455	0.32455	0.32455	0.32455	0.32455	0.32455	0.32455	0.32455	0.32455	0.32455	0.32455	0.32455	0.32455	0.32455	0.32455	0.32455	0.32455	0.32455	0.32455
186	0.32455	0.32455	0.32455	0.32455	0.32455	0.32455	0.32455	0.32455	0.32455	0.32455	0.32455	0.32455	0.32455	0.32455	0.32455	0.32455	0.32455	0.32455	0.32455	0.32455	0.32455	0.32455	0.32455	0.32455	0.32455	0.32455	0.32455	0.32455	0.32455	0.32455	0.32455	0.32455	0.32455	0.32455	0.32455	0.32455	0.32455	0.32455	0.32455	0.32455	0.32455	0.32455	0.32455	0.32455	0.32455	0.32455	0.32455	0.32455	0.32455
187	0.32454	0.32454	0.32454	0.32454	0.32454	0.32454	0.32454	0.32454	0.32454	0.32454	0.32454	0.32454	0.32454	0.32454	0.32454	0.32454	0.32454	0.32454	0.32454	0.32454	0.32454	0.32454	0.32454	0.32454	0.32454	0.32454	0.32454	0.32454	0.32454	0.32454	0.32454	0.32454	0.32454	0.32454	0.32454	0.32454	0.32454	0.32454	0.32454	0.32454	0.32454	0.32454	0.32454	0.32454	0.32454	0.32454	0.32454	0.32454	0.32454
188	0.32454	0.32454	0.32454	0.32454	0.32454	0.32454	0.32454	0.32454	0.32454	0.32454	0.32454	0.32454	0.32454	0.32454	0.32454	0.32454	0.32454	0.32454	0.32454	0.32454	0.32454	0.32454	0.32454	0.32454	0.32454	0.32454	0.32454	0.32454	0.32454	0.32454	0.32454	0.32454	0.32454	0.32454	0.32454	0.32454	0.32454	0.32454	0.32454	0.32454	0.32454	0.32454	0.32454	0.32454	0.32454	0.32454	0.32454	0.32454	0.32454
189	0.32454	0.32454	0.32454	0.32454	0.32454	0.32454	0.32454	0.32454	0.32454	0.32454	0.32454	0.32454	0.32454	0.32454	0.32454	0.32454	0.32454	0.32454	0.32454	0.32454	0.32454	0.32454	0.32454	0.32454	0.32454	0.32454	0.32454	0.32454	0.32454	0.32454	0.32454	0.32454	0.32454	0.32454	0.32454	0.32454	0.32454	0.32454	0.32454	0.32454	0.32454	0.32454	0.32454	0.32454	0.32454	0.32454	0.32454	0.32454	0.32454
190	0.32454	0.32454	0.32454	0.32454	0.32454	0.32454	0.32454	0.32454	0.32454	0.32454	0.32454	0.32454	0.32454	0.32454	0.32454	0.32454	0.32454	0.32454	0.32454	0.32454	0.32454	0.32454	0.32454	0.32454	0.32454	0.32454	0.32454	0.32454	0.32454	0.32454	0.32454	0.32454	0.32454	0.32454	0.32454	0.32454	0.32454	0.32454	0.32454	0.32454	0.32454	0.32454	0.32454	0.32454	0.32454	0.32454	0.32454	0.32454	0.32454
191	0.32453	0.32453	0.32453	0.32453	0.32453	0.32453	0.32453	0.32453	0.32453	0.32453	0.32453	0.32453	0.32453	0.32453	0.32453	0.32453	0.32453	0.32453	0.32453	0.32453	0.32453	0.32453	0.32453	0.32453	0.32453	0.32453	0.32453	0.32453	0.32453	0.32453	0.32453	0.32453	0.32453	0.32453	0.32453	0.32453	0.32453	0.32453	0.32453	0.32453	0.32453	0.32453	0.32453	0.32453	0.32453	0.32453	0.32453	0.32453	0.32453
192	0.32453	0.32453	0.32453	0.32453	0.32453	0.32453	0.32453	0.32453	0.32453	0.32453	0.32453	0.32453	0.32453	0.32453	0.32453	0.32453	0.32453	0.32453	0.32453	0.32453	0.32453	0.32453	0.32453	0.32453	0.32453	0.32453	0.32453	0.32453	0.32453	0.32453	0.32453	0.32453	0.32453	0.32453	0.32453	0.32453	0.32453	0.32453	0.32453	0.32453	0.32453	0.32453	0.32453	0.32453	0.32453	0.32453	0.32453	0.32453	0.32453
193	0.32453	0.32453	0.32453	0.32453	0.32453	0.32453	0.32453	0.32453	0.32453	0.32453	0.32453	0.32453	0.32453	0.32453	0.32453	0.32453	0.32453	0.32453	0.32453	0.32453	0.32453	0.32453	0.32453	0.32453	0.32453	0.32453	0.32453	0.32453	0.32453	0.32453	0.32453	0.32453	0.32453	0.32453	0.32453	0.32453	0.32453	0.32453	0.32453	0.32453	0.32453	0.32453	0.32453	0.32453	0.32453	0.32453	0.32453	0.32453	0.32453
194	0.32453	0.32453	0.32453	0.32453	0.32453	0.32453	0.32453	0.32453	0.32453	0.32453	0.32453	0.32453	0.32453	0.32453	0.32453	0.32453	0.32453	0.32453	0.32453	0.32453	0.32453	0.32453	0.32453	0.32453	0.32453	0.32453	0.32453	0.32453	0.32453	0.32453	0.32453	0.32453	0.32453	0.32453	0.32453	0.32453	0.32453	0.32453	0.32453	0.32453	0.32453	0.32453	0.32453	0.32453	0.32453	0.32453	0.32453	0.32453	0.32453
195	0.32454	0.32454	0.32454	0.32454	0.32454	0.32454	0.32454	0.32454	0.32454	0.32454	0.32454	0.32454	0.32454	0.32454	0.32454	0.32454	0.32454	0.32454	0.32454	0.32454	0.32454	0.32454	0.32454	0.32454	0.32454	0.32454	0.32454	0.32454	0.32454	0.32454	0.32454	0.32454	0.32454	0.32454	0.32454	0.32454	0.32454	0.32454	0.32454	0.32454	0.32454	0.32454	0.32454	0.32454	0.32454	0.32454	0.32454	0.32454	0.32454
196	0.32454	0.32454	0.32454	0.32454	0.32454	0.32454	0.32454	0.32454	0.32454	0.32454	0.32454	0.32454	0.32454	0.32454	0.32454	0.32454	0.32454	0.32454	0.32454	0.32454	0.32454	0.32454	0.32454	0.32454	0.32454	0.32454	0.32454	0.32454	0.32454	0.32454	0.32454	0.32454	0.32454	0.32454	0.32454	0.32454	0.32454	0.32454	0.32454	0.32454	0.32454	0.32454	0.32454	0.32454	0.32454	0.32454	0.32454	0.32454	0.32454
197	0.32454	0.32454	0.32454	0.32454	0.32454	0.32454	0.32454	0.32454	0.32454	0.32454	0.32454	0.32454	0.32454	0.32454	0.32454	0.32454	0.32454	0.32454	0.32454	0.32454	0.32454	0.32454	0.32454	0.32454	0.32454	0.32454	0.32454	0.32454	0.32454	0.32454	0.32454	0.32454	0.32454	0.32454	0.32454	0.32454	0.32454	0.32454	0.32454	0.32454	0.32454	0.32454	0.32454	0.32454	0.32454	0.32454	0.32454	0.32454	0.32454
198	0.32454	0.32454	0.32454	0.32454	0.32454	0.32454	0.32454	0.32454	0.32454	0.32454	0.32454	0.32454	0.32454	0.32454	0.32454	0.32454	0.32454	0.32454	0.32454	0.32454	0.32454	0.32454	0.32454	0.32454	0.32454	0.32454	0.32454	0.32454	0.32454	0.32454	0.32454	0.32454	0.32454	0.32454	0.32454	0.32454	0.32454	0.32454	0.32454	0.32454	0.32454	0.32454	0.32454	0.32454	0.32454	0.32454	0.32454	0.32454	0.32454
199	0.32454	0.32454	0.32454	0.32454	0.32454	0.32454	0.32454	0.32454	0.32454	0.32454	0.32454	0.32454	0.32454	0.32454	0.32454	0.32454	0.32454	0.32454	0.32454	0.32454	0.32454	0.32454	0.32454	0.32454	0.32454	0.32454	0.32454	0.32454	0.32454	0.32454	0.32454	0.32454	0.32454	0.32454	0.32454	0.32454	0.32454	0.32454	0.32454	0.32454	0.32454	0.32454	0.32454	0.32454	0.32454	0.32454	0.32454	0.32454	0.32454
200	0.32455	0.32455	0.32455	0.32455	0.32455	0.32455	0.32455	0.32455	0.32455	0.32455	0.32455	0.32455	0.32455	0.32455	0.32455	0.32455	0.32455	0.32455	0.32455	0.32455	0.32455	0.32455	0.32455	0.32455	0.32455	0.32455	0.32455	0.32455	0.32455	0.32455	0.32455	0.32455	0.32455	0.32455	0.32455	0.32455	0.32455	0.32455	0.32455	0.32455	0.32455	0.32455	0.32455	0.32455	0.32455	0.32455	0.32455	0.32455	0.32455
201	0.32813	0.32856	0.32857	0.3281	0.32799	0.32877	0.3287	0.32852	0.32789	0.32892	0.32897	0.32789	0.32877	0.32871	0.32885	0.32965	0.32911	0.32961	0.32927	0.3288	0.33013	0.32952	0.32984	0.32906	0.32922	0.32865	0.33059	0.33077	0.33071	0.33046	0.32974	0.33072	0.32959	0.32911	0.32945	0.32945	0.32903	0.32973	0.33036	0.33074	0.33001	0.33031	0.33034	0.33018	0.333	0.33039	0.33085	0.33083	0.33016
202	0.34342	0.34556	0.34554	0.34334	0.34303	0.34614	0.34612	0.34528	0.34212	0.3474	0.34775	0.34232	0.34664	0.34691	0.34778	0.35135	0.34878	0.3511	0.34941	0.34748	0.35396	0.35154	0.35256	0.34863	0.34935	0.3469	0.35677	0.35774	0.35745	0.35765	0.3532	0.35819	0.3511	0.34883	0.35043	0.35068	0.34839	0.35207	0.35552	0.35843	0.35423	0.3555	0.35641	0.35525	0.36879	0.35662	0.35874	0.3588	0.35589
203	0.36938	0.37445	0.37432	0.36928	0.36878	0.37553	0.37578	0.37364	0.36618	0.37913	0.38007	0.36686	0.37735	0.37851	0.38097	0.389	0.38293	0.38844	0.38414	0.38012	0.3957	0.39051	0.39249	0.3827	0.38435	0.37895	0.40344	0.40602	0.40531	0.40862	0.39555	0.40831	0.38859	0.38314	0.38707	0.38773	0.3822	0.39134	0.40057	0.40855	0.39775	0.40077	0.40398	0.40048	0.43436	0.40463	0.40956	0.40991	0.40332
204	0.40413	0.41343	0.41317	0.40405	0.4035	0.41515	0.41608	0.41162	0.39818	0.4227	0.42461	0.39951	0.41948	0.42219	0.4274	0.44165	0.43038	0.44064	0.43219	0.42549	0.45484	0.44587	0.44912	0.43008	0.43307	0.42372	0.47112	0.47651	0.47516	0.48654	0.45734	0.48296	0.44119	0.43089	0.43861	0.43969	0.42951	0.44705	0.46614	0.48221	0.46107	0.46687	0.47445	0.46644	0.53419	0.47616	0.48519	0.48608	0.47422
205	0.44734	0.46252	0.46211	0.44739	0.44704	0.46495	0.46725	0.45896	0.43767	0.47876	0.48215	0.43974	0.47359	0.47874	0.48838	0.51069	0.49221	0.5091	0.49449	0.4846	0.53343	0.51973	0.52455	0.49182	0.49659	0.48235	0.56321	0.57307	0.57077	0.59898	0.54236	0.58744	0.51048	0.49323	0.50674	0.50806	0.49167	0.52131	0.55593	0.58352	0.54782	0.55768	0.57268	0.55682	0.67412	0.57655	0.59084	0.59267	0.57411
206	0.49959	0.52252	0.52199	0.49992	0.50025	0.52567	0.53034	0.51613	0.48509	0.54868	0.55417	0.4879	0.54114	0.54986	0.56603	0.59753	0.57009	0.59531	0.57241	0.55926	0.63255	0.61406	0.62055	0.56959	0.57653	0.55693	0.68039	0.69588	0.69254	0.74761	0.65357	0.72224	0.59816	0.57193	0.59345	0.59452	0.5708	0.61609	0.67174	0.71192	0.66037	0.67507	0.70025	0.67325	0.83942	0.70761	0.72651	0.72961	0.70521
207	0.56098	0.59316	0.59254	0.56183	0.56348	0.59683	0.60504	0.58271	0.54069	0.63173	0.63974	0.54403	0.62189	0.63517	0.6594	0.69817	0.66227	0.69554	0.66386	0.64856	0.74423	0.72352	0.73101	0.66173	0.67076	0.64689	0.807	0.82588	0.82225	0.89869	0.78086	0.86193	0.70042	0.66532	0.6956	0.69548	0.66556	0.72589	0.80014	0.84464	0.78743	0.80493	0.83723	0.80178	0.96716	0.84765	0.86571	0.86952	0.84627
208	0.62933	0.67033	0.66968	0.63096	0.63456	0.67402	0.68638	0.65506	0.6031	0.72043	0.73049	0.60653	0.70966	0.72702	0.75749	0.7959	0.75746	0.79356	0.75746	0.74304	0.84321	0.82616	0.83279	0.75708	0.76694	0.74289	0.90338	0.91901	0.91659	0.98367	0.88798	0.95168	0.80007	0.76188	0.79663	0.79453	0.76415	0.82848	0.90183	0.93373	0.89217	0.90643	0.9338	0.9027	1.0056	0.94345	0.95358	0.95651	0.94341
209	0.69803	0.74341	0.74283	0.70051	0.70617	0.74639	0.76169	0.72434	0.6676	0.79752	0.80771	0.67043	0.78864	0.80679	0.83641	0.86393	0.83301	0.86261	0.83132	0.82162	0.89884	0.89011	0.89408	0.83303	0.8414	0.82315	0.93878	0.94718	0.94648	0.98667	0.93652	0.96765	0.86902	0.83822	0.86794	0.86427	0.84194	0.89184	0.94214	0.95481	0.93784	0.94495	0.95963	0.94193	0.98034	0.96567	0.96796	0.9694	0.96625
210	0.75575	0.79735	0.79691	0.75877	0.76556	0.79903	0.81406	0.7777	0.72525	0.84364	0.85161	0.72683	0.8391	0.85345	0.87445	0.88674	0.86926	0.88657	0.86681	0.86327	0.9044	0.90316	0.90449	0.86973	0.87496	0.86565	0.92302	0.92571	0.92613	0.94594	0.92846	0.93616	0.89125	0.87418	0.89208	0.88819	0.87778	0.90417	0.92851	0.92828	0.92811	0.92965	0.93442	0.92766	0.92869	0.93743	0.93573	0.93619	0.93807
211	0.79111	0.82144	0.82117	0.79404	0.80032	0.8218	0.8334	0.80497	0.76555	0.85209	0.85685	0.76568	0.85207	0.86038	0.87069	0.87115	0.86557	0.87174	0.8633	0.86442	0.8755	0.87854	0.87825	0.86631	0.86855	0.86666	0.87996	0.8794	0.88037	0.8885	0.88843	0.88388	0.87442	0.86949	0.87614	0.87292	0.87195	0.87904	0.88587	0.87926	0.88742	0.88599	0.8853	0.88477	0.86779	0.88649	0.88318	0.88313	0.88705
212	0.79949	0.81603	0.81589	0.80177	0.80626	0.81546	0.82245	0.80472	0.782	0.83075	0.83272	0.78101	0.83386	0.83681	0.8388	0.83241	0.83457	0.83336	0.83289	0.8365	0.82856	0.8336	0.83251	0.83542	0.8356	0.83818	0.82472	0.82243	0.82363	0.82516	0.83406	0.82346	0.83451	0.83744	0.83646	0.83408	0.83868	0.83381	0.83042	0.8209	0.83286	0.82997	0.82642	0.82926	0.80409	0.82655	0.82269	0.82237	0.82699
213	0.78403	0.78858	0.78851	0.78544	0.78777	0.78753	0.79038	0.78244	0.77489	0.79099	0.79099	0.77336	0.79579	0.79501	0.79163	0.78174	0.78841	0.78284	0.78733	0.79199	0.77317	0.77899	0.77755	0.78926	0.78821	0.79308	0.76455	0.76132	0.76262	0.7603	0.77378	0.76033	0.78295	0.7904	0.78483	0.78318	0.79068	0.77904	0.76982	0.75912	0.7726	0.76904	0.764	0.76866	0.74027	0.76348	0.75958	0.75913	0.7638
214	0.7517	0.7474	0.74737	0.75229	0.7527	0.74617	0.74582	0.74554	0.74948	0.74116	0.73985	0.74787	0.74678	0.74355	0.73676	0.72523	0.73447	0.72637	0.73392	0.73889	0.71395	0.71992	0.71837	0.73528	0.73351	0.73946	0.70258	0.69888	0.70019	0.69554	0.71123	0.69664	0.72576	0.73578	0.72744	0.7264	0.73533	0.71989	0.70733	0.69639	0.71019	0.70637	0.70058	0.70622	0.67728	0.69965	0.69596	0.69545	0.69984
215	0.70867	0.69822	0.6982	0.70858	0.70746	0.69698	0.69423	0.6997	0.71165	0.686	0.68379	0.71026	0.69192	0.68709	0.67815	0.66604	0.67668	0.66716	0.67657	0.68146	0.65328	0.65905	0.65752	0.67742	0.67524	0.68157	0.64036	0.63644	0.63773	0.63163	0.64817	0.63342	0.66603	0.67745	0.66747	0.66694	0.67643	0.65899	0.64456	0.6339	0.64733	0.6435	0.63738	0.64351	0.61557	0.63617	0.63284	0.63231	0.63624
216	0.65934	0.64469	0.64467	0.65871	0.6564	0.64354	0.639	0.64876	0.66607	0.62832	0.6255	0.66501	0.63425	0.62836	0.61804	0.60598	0.6173	0.60704	0.61759	0.62216	0.59247	0.59785	0.59642	0.61797	0.61557	0.62188	0.57873	0.57474	0.57598	0.56894	0.58556	0.5712	0.60553	0.61764	0.60671	0.6066	0.61617	0.59778	0.58236	0.57228	0.58495	0.58124	0.57504	0.58138	0.5553	0.57362	0.57074	0.57021	0.57358
217	0.60639	0.58887	0.58882	0.60533	0.60209	0.58785	0.58194	0.59497	0.61584	0.56958	0.56633	0.61518	0.57534	0.56875	0.55756	0.54592	0.55746	0.5469	0.55811	0.56224	0.53214	0.53701	0.53573	0.55806	0.55558	0.56161	0.51804	0.51407	0.51525	0.50762	0.52381	0.51019	0.54511	0.55746	0.54601	0.54628	0.55561	0.53696	0.52109	0.51178	0.52346	0.51995	0.51384	0.52019	0.4965	0.51226	0.50986	0.50934	0.5121
218	0.55141	0.53194	0.53187	0.55	0.54602	0.53109	0.52412	0.53966	0.56285	0.51061	0.50706	0.5626	0.51609	0.50904	0.49733	0.48636	0.49783	0.48726	0.49878	0.5024	0.47265	0.47693	0.47583	0.49835	0.49586	0.50146	0.45851	0.45464	0.45573	0.44778	0.4632	0.45054	0.48525	0.49752	0.48587	0.48647	0.49536	0.47691	0.46099	0.45255	0.4631	0.45985	0.45393	0.46018	0.43914	0.45223	0.45033	0.44983	0.45197
219	0.49552	0.47478	0.47468	0.49382	0.48926	0.4741	0.46631	0.4838	0.50839	0.45205	0.4483	0.50857	0.45717	0.44985	0.43789	0.42775	0.43892	0.42855	0.44015	0.44322	0.41433	0.41801	0.41709	0.43937	0.43692	0.442	0.4004	0.39667	0.39768	0.38962	0.40403	0.39246	0.42638	0.43835	0.42673	0.42762	0.43593	0.41801	0.40233	0.39482	0.40417	0.4012	0.39557	0.4016	0.38333	0.39379	0.39236	0.3919	0.39344
220	0.43954	0.41807	0.41795	0.43761	0.4326	0.41757	0.40918	0.42811	0.45342	0.3945	0.39063	0.45401	0.39919	0.39178	0.37981	0.37059	0.3813	0.37129	0.38275	0.38527	0.35768	0.36076	0.36002	0.38167	0.37931	0.38382	0.34419	0.34065	0.34157	0.3336	0.34682	0.33643	0.36902	0.38051	0.36912	0.37026	0.3779	0.36079	0.3456	0.33905	0.34717	0.34451	0.33924	0.34496	0.32943	0.33742	0.33643	0.336	0.33701
221	0.38426	0.36255	0.36241	0.38218	0.37684	0.36223	0.35345	0.37332	0.39879	0.33869	0.3348	0.39976	0.3429	0.33555	0.32384	0.31562	0.3257	0.31621	0.3273	0.32929	0.30343	0.30593	0.30536	0.32599	0.32375	0.32768	0.29063	0.28735	0.28816	0.2805	0.29237	0.28321	0.3139	0.32471	0.31379	0.31511	0.32201	0.30597	0.29156	0.28598	0.29287	0.29053	0.28571	0.29102	0.27813	0.2839	0.28329	0.2829	0.28346
222	0.3305	0.30906	0.3089	0.32831	0.32282	0.3089	0.30001	0.32023	0.34529	0.28558	0.28177	0.34659	0.28926	0.28217	0.27103	0.26388	0.27314	0.26437	0.27482	0.27631	0.25269	0.25465	0.25422	0.27335	0.27127	0.27462	0.24091	0.23795	0.23864	0.23156	0.24189	0.23405	0.2621	0.27201	0.26183	0.26326	0.26933	0.2547	0.24141	0.23681	0.24247	0.24048	0.23621	0.24097	0.23059	0.23449	0.23417	0.23384	0.23405
223	0.27932	0.25881	0.25865	0.27711	0.27169	0.25877	0.25013	0.26994	0.29393	0.23653	0.23295	0.29548	0.23962	0.23305	0.22288	0.21688	0.22507	0.21726	0.22671	0.22778	0.207	0.20847	0.20816	0.2252	0.22333	0.22611	0.19662	0.19407	0.19463	0.1884	0.19701	0.19057	0.21514	0.22388	0.21476	0.2162	0.22135	0.20852	0.19679	0.19316	0.19762	0.19598	0.19237	0.19645	0.18841	0.19082	0.19071	0.19044	0.19042
224	0.2322	0.21338	0.21323	0.23008	0.22497	0.21344	0.20545	0.22393	0.24608	0.19325	0.19005	0.24775	0.19571	0.18993	0.18112	0.17631	0.18321	0.1766	0.18471	0.18542	0.16806	0.16909	0.16888	0.18328	0.18168	0.18389	0.1594	0.15733	0.15776	0.15259	0.1594	0.15437	0.17473	0.18205	0.17432	0.17565	0.17982	0.16913	0.15934	0.15662	0.15995	0.15868	0.15579	0.15909	0.15316	0.15449	0.1545	0.15429	0.15415
225	0.19081	0.1744	0.17427	0.18889	0.18435	0.17451	0.16756	0.18385	0.20338	0.15721	0.15452	0.20505	0.15905	0.15424	0.14707	0.1434	0.14891	0.1436	0.15018	0.15062	0.13688	0.13757	0.13743	0.14893	0.14762	0.14931	0.13006	0.12847	0.12878	0.12472	0.12983	0.1261	0.14205	0.14784	0.14166	0.14282	0.14601	0.13759	0.12985	0.12794	0.13029	0.12935	0.12717	0.1297	0.12553	0.12614	0.12622	0.12606	0.12588
226	0.15659	0.14314	0.14304	0.15497	0.15121	0.14326	0.1376	0.15105	0.16734	0.12936	0.12723	0.16887	0.13063	0.12689	0.12139	0.11873	0.12289	0.11886	0.1239	0.12414	0.11385	0.11429	0.11419	0.12288	0.12187	0.12311	0.10875	0.10759	0.1078	0.10475	0.10843	0.10578	0.11766	0.12199	0.11733	0.11825	0.12058	0.1143	0.10849	0.1072	0.10878	0.10812	0.10655	0.10839	0.10558	0.10578	0.10587	0.10576	0.10558
227	0.13019	0.1197	0.11963	0.1289	0.12595	0.11981	0.11544	0.12598	0.13891	0.10915	0.10753	0.14018	0.10997	0.10718	0.10312	0.10125	0.1043	0.10132	0.10505	0.10518	0.097696	0.097969	0.097895	0.10426	0.1035	0.10441	0.093964	0.093136	0.09327	0.090994	0.093631	0.091769	0.10042	0.10355	0.10015	0.10087	0.10252	0.09796	0.093689	0.092849	0.093885	0.093429	0.092315	0.093641	0.091764	0.091747	0.091837	0.091757	0.091611
228	0.11104	0.10311	0.10306	0.11005	0.10785	0.10319	0.099901	0.10794	0.11787	0.09518	0.093962	0.11887	0.095689	0.093625	0.09066	0.089342	0.09157	0.089383	0.092127	0.092198	0.086761	0.086929	0.086871	0.091524	0.090952	0.091626	0.084022	0.083431	0.083515	0.081789	0.083704	0.082387	0.088708	0.090964	0.0885	0.089055	0.090222	0.086909	0.083754	0.083212	0.083884	0.083569	0.082776	0.083736	0.082481	0.082357	0.082438	0.082381	0.08226
229	0.097827	0.091845	0.091819	0.097083	0.095453	0.09191	0.089434	0.095543	0.10313	0.085862	0.084937	0.10387	0.08616	0.084621	0.082433	0.081489	0.083144	0.081509	0.083556	0.083594	0.079588	0.079689	0.079639	0.083093	0.082652	0.08317	0.077544	0.077118	0.077167	0.075823	0.077247	0.076302	0.080996	0.082641	0.080833	0.081267	0.082106	0.079661	0.077287	0.076945	0.077374	0.077154	0.076583	0.077289	0.076447	0.076268	0.076339	0.076298	0.076199
230	0.089045	0.084467	0.084458	0.088479	0.087272	0.084511	0.082624	0.087336	0.093205	0.079868	0.07915	0.093749	0.080023	0.078854	0.077211	0.076522	0.077777	0.076527	0.078085	0.078105	0.075096	0.075155	0.07511	0.077723	0.077374	0.077789	0.073543	0.073233	0.073258	0.072182	0.073268	0.072579	0.07613	0.07735	0.076	0.076347	0.076961	0.075122	0.073297	0.073091	0.073355	0.0732	0.072784	0.073312	0.072749	0.072544	0.072607	0.072576	0.072495
231	0.083433	0.079848	0.07985	0.082996	0.08209	0.079875	0.078407	0.082122	0.08678	0.076229	0.075659	0.087173	0.076288	0.07538	0.074122	0.073609	0.074583	0.073604	0.074816	0.074827	0.072521	0.072552	0.072509	0.074528	0.074244	0.074588	0.071317	0.07109	0.071098	0.070211	0.07106	0.070551	0.073291	0.074212	0.073186	0.07347	0.073927	0.072514	0.07108	0.070969	0.071119	0.071009	0.070702	0.071105	0.070734	0.070517	0.070572	0.070549	0.070482
232	0.080072	0.077189	0.077199	0.079726	0.079035	0.077203	0.076034	0.079037	0.082841	0.074268	0.073803	0.083123	0.074259	0.073537	0.072553	0.072163	0.072938	0.072152	0.073117	0.073124	0.071315	0.071327	0.071286	0.072883	0.072644	0.072939	0.07036	0.070191	0.070188	0.069435	0.070118	0.069736	0.071898	0.072607	0.071811	0.07205	0.072397	0.071286	0.070131	0.070085	0.070155	0.070078	0.069849	0.070162	0.069924	0.069701	0.069751	0.069733	0.069677
233	0.078313	0.075929	0.075946	0.078033	0.077496	0.075933	0.074979	0.077472	0.080672	0.073505	0.073115	0.080872	0.07345	0.072859	0.07207	0.071766	0.0724	0.07175	0.072541	0.072544	0.071087	0.071087	0.071047	0.072345	0.072138	0.0724	0.070309	0.070183	0.070171	0.069514	0.070079	0.069787	0.071538	0.072098	0.071466	0.071671	0.071941	0.071044	0.070087	0.070087	0.070102	0.070047	0.069873	0.070123	0.069978	0.069753	0.069798	0.069784	0.069736
234	0.077699	0.075668	0.07569	0.077465	0.077037	0.075665	0.074863	0.076993	0.079765	0.073597	0.07326	0.079906	0.07351	0.073013	0.072361	0.072118	0.072652	0.072099	0.072765	0.072767	0.07156	0.071551	0.071511	0.072596	0.072413	0.072651	0.070908	0.070812	0.070794	0.070205	0.070687	0.070458	0.071917	0.072371	0.071854	0.072036	0.072252	0.071506	0.070691	0.070724	0.070699	0.070661	0.070525	0.07073	0.070652	0.070425	0.070467	0.070456	0.070413
235	0.077909	0.076127	0.076151	0.077708	0.077357	0.076118	0.075424	0.077297	0.079769	0.074305	0.074007	0.079866	0.074196	0.073765	0.073211	0.07301	0.073473	0.072989	0.073567	0.073569	0.072538	0.072523	0.072484	0.073418	0.073251	0.073473	0.071977	0.071902	0.07188	0.07134	0.071762	0.07158	0.072829	0.073208	0.072773	0.072938	0.073116	0.072477	0.071764	0.07182	0.071766	0.07174	0.071632	0.071805	0.071777	0.071546	0.071587	0.071577	0.071538
236	0.078687	0.077082	0.077109	0.07851	0.078214	0.07707	0.076453	0.078142	0.0804	0.075439	0.075168	0.080466	0.075315	0.074931	0.074447	0.074277	0.074689	0.074255	0.074769	0.07477	0.073868	0.073848	0.073809	0.074634	0.074479	0.074688	0.073373	0.073314	0.073289	0.072785	0.073162	0.073014	0.07411	0.074435	0.074059	0.074212	0.074362	0.073801	0.073162	0.073236	0.073161	0.073143	0.073056	0.073205	0.073216	0.072981	0.073021	0.073012	0.072974
237	0.079864	0.078386	0.078415	0.079703	0.079447	0.078371	0.07781	0.079366	0.081471	0.076873	0.076621	0.081516	0.076738	0.076388	0.075955	0.075808	0.076182	0.075785	0.076252	0.076252	0.075445	0.075421	0.075383	0.076128	0.075981	0.076181	0.074999	0.074952	0.074925	0.074449	0.074791	0.07467	0.075651	0.075937	0.075604	0.075748	0.075877	0.075374	0.074791	0.074878	0.074787	0.074775	0.074703	0.074834	0.074878	0.074635	0.074676	0.074668	0.074631
238	0.081326	0.079941	0.07997	0.081178	0.080949	0.079924	0.079402	0.080863	0.082858	0.078521	0.078284	0.082887	0.078378	0.078054	0.077658	0.077529	0.077874	0.077504	0.077937	0.077936	0.077199	0.077172	0.077135	0.07782	0.07768	0.077872	0.076791	0.076752	0.076724	0.076269	0.076583	0.076484	0.077379	0.077635	0.077334	0.077471	0.077585	0.077125	0.076584	0.076682	0.076577	0.076571	0.07651	0.076628	0.0767	0.076448	0.076489	0.076483	0.076445
239	0.082994	0.081675	0.081706	0.082855	0.082645	0.081658	0.081164	0.082557	0.084471	0.080323	0.080098	0.08449	0.080175	0.079869	0.0795	0.079385	0.079709	0.07936	0.079767	0.079764	0.079081	0.079051	0.079014	0.079655	0.07952	0.079705	0.078701	0.07867	0.07864	0.078203	0.078493	0.078412	0.079241	0.079475	0.079197	0.07933	0.079431	0.079004	0.078495	0.078602	0.078486	0.078484	0.078433	0.07854	0.078639	0.078375	0.078417	0.078412	0.078372
240	0.08481	0.083539	0.083569	0.084676	0.08448	0.083521	0.083047	0.084391	0.086247	0.082236	0.082018	0.086259	0.082084	0.081791	0.081441	0.081338	0.081645	0.081312	0.081701	0.081696	0.081055	0.08102	0.080985	0.081591	0.081461	0.08164	0.080697	0.08067	0.08064	0.080216	0.080487	0.080421	0.081198	0.081415	0.081154	0.081284	0.081376	0.080974	0.080491	0.080606	0.080479	0.080481	0.080437	0.080536	0.080662	0.080382	0.080427	0.080422	0.080379
241	0.086736	0.085499	0.08553	0.086606	0.086419	0.085481	0.085022	0.086332	0.088146	0.084232	0.084019	0.088153	0.084076	0.083793	0.083458	0.083365	0.083659	0.083338	0.083712	0.083705	0.083097	0.083059	0.083025	0.083605	0.083478	0.083651	0.082757	0.082735	0.082703	0.082292	0.082543	0.082492	0.083227	0.083431	0.083184	0.083311	0.083395	0.083013	0.08255	0.082674	0.082536	0.082542	0.082504	0.082595	0.082749	0.082452	0.082499	0.082494	0.082449
242	0.088729	0.087518	0.087549	0.088602	0.088421	0.087501	0.087051	0.088337	0.090119	0.086277	0.086069	0.090123	0.086118	0.085843	0.085519	0.085435	0.085718	0.085408	0.08577	0.085761	0.085181	0.085139	0.085107	0.085664	0.08554	0.085708	0.084856	0.084838	0.084806	0.084405	0.084638	0.084602	0.085299	0.085492	0.085256	0.085382	0.085458	0.085093	0.084648	0.08478	0.084632	0.084641	0.084609	0.084694	0.084877	0.084558	0.084609	0.084605	0.084555
243	0.090777	0.089586	0.089616	0.090652	0.090475	0.089568	0.089125	0.090394	0.092153	0.088364	0.088159	0.092155	0.088202	0.087932	0.087617	0.087543	0.087816	0.087515	0.087868	0.087855	0.0873	0.087254	0.087223	0.087762	0.087641	0.087803	0.086989	0.086974	0.086941	0.08655	0.086765	0.086744	0.087408	0.087591	0.087363	0.087489	0.087558	0.087208	0.086779	0.08692	0.08676	0.086772	0.086746	0.086825	0.087041	0.086697	0.086752	0.086749	0.086693
244	0.092862	0.091685	0.091715	0.092738	0.092563	0.091668	0.09123	0.092487	0.094227	0.090478	0.090276	0.094229	0.090314	0.090048	0.08974	0.089675	0.089939	0.089647	0.089991	0.089975	0.089443	0.089392	0.089363	0.089885	0.089766	0.089922	0.089144	0.089133	0.0891	0.088718	0.088914	0.088908	0.089541	0.089715	0.089495	0.089621	0.089682	0.089347	0.088933	0.089083	0.088911	0.088927	0.088906	0.08898	0.089231	0.088859	0.088918	0.088915	0.088854
245	0.094977	0.093812	0.093842	0.094854	0.094681	0.093796	0.09336	0.09461	0.096335	0.092617	0.092416	0.096337	0.092449	0.092187	0.091885	0.09183	0.092085	0.091801	0.092137	0.092117	0.091608	0.091551	0.091525	0.092031	0.091914	0.092064	0.091322	0.091314	0.09128	0.090908	0.091084	0.091094	0.091696	0.091862	0.091649	0.091774	0.091828	0.091507	0.091108	0.091268	0.091083	0.091102	0.091087	0.091155	0.091445	0.091041	0.091105	0.091103	0.091035
246	0.097122	0.095965	0.095995	0.096999	0.096826	0.095951	0.095516	0.096762	0.098475	0.094778	0.094579	0.098479	0.094607	0.094348	0.094051	0.094006	0.094253	0.093977	0.094307	0.094282	0.093794	0.093732	0.093708	0.094199	0.094084	0.094228	0.093521	0.093517	0.093482	0.09312	0.093274	0.093302	0.093872	0.09403	0.093823	0.09395	0.093996	0.093689	0.093303	0.093475	0.093275	0.093299	0.093289	0.093351	0.093685	0.093244	0.093314	0.093313	0.093238
247	0.09929	0.09814	0.098169	0.099167	0.098994	0.098128	0.097693	0.098938	0.10064	0.096959	0.096762	0.10065	0.096785	0.096529	0.096236	0.096202	0.09644	0.096172	0.096495	0.096465	0.096	0.095932	0.095909	0.096385	0.096274	0.096409	0.095739	0.095739	0.095703	0.095351	0.095482	0.09553	0.096067	0.096217	0.096016	0.096144	0.096182	0.095889	0.095518	0.095702	0.095486	0.095514	0.095511	0.095567	0.095948	0.095467	0.095543	0.095543	0.09546
248	0.10148	0.10034	0.10037	0.10136	0.10118	0.10033	0.099891	0.10114	0.10283	0.099161	0.098964	0.10284	0.098982	0.098729	0.09844	0.098417	0.098647	0.098386	0.098703	0.098668	0.098227	0.098151	0.098131	0.098592	0.098482	0.09861	0.097978	0.097982	0.097946	0.097605	0.097709	0.097779	0.098282	0.098423	0.098229	0.098358	0.098387	0.098108	0.097753	0.097951	0.097717	0.09775	0.097753	0.097802	0.098237	0.097711	0.097794	0.097795	0.097702
249	0.1037	0.10256	0.10258	0.10357	0.1034	0.10255	0.10211	0.10336	0.10505	0.10138	0.10119	0.10506	0.1012	0.10095	0.10066	0.10065	0.10087	0.10062	0.10093	0.10089	0.10048	0.10039	0.10037	0.10082	0.10071	0.10083	0.10024	0.10025	0.10021	0.099884	0.099959	0.10005	0.10052	0.10065	0.10046	0.10059	0.10061	0.10035	0.10001	0.10022	0.099971	0.10001	0.10002	0.10006	0.10056	0.099979	0.10007	0.10007	0.099969
250	0.10593	0.10479	0.10482	0.10581	0.10563	0.10479	0.10435	0.1056	0.10728	0.10363	0.10343	0.1073	0.10344	0.10319	0.10291	0.10291	0.10312	0.10288	0.10318	0.10313	0.10275	0.10265	0.10264	0.10307	0.10296	0.10307	0.10253	0.10254	0.1025	0.10219	0.10223	0.10235	0.10278	0.1029	0.10272	0.10285	0.10286	0.10261	0.10229	0.10252	0.10225	0.10229	0.10231	0.10234	0.10291	0.10227	0.10237	0.10238	0.10226
251	0.10819	0.10706	0.10708	0.10806	0.10788	0.10705	0.10661	0.10787	0.10954	0.10589	0.1057	0.10956	0.1057	0.10545	0.10517	0.10519	0.10539	0.10516	0.10546	0.1054	0.10504	0.10494	0.10493	0.10534	0.10523	0.10534	0.10484	0.10486	0.10482	0.10452	0.10453	0.10468	0.10506	0.10517	0.10499	0.10513	0.10513	0.1049	0.1046	0.10485	0.10455	0.1046	0.10463	0.10465	0.10529	0.10459	0.1047	0.1047	0.10457
252	0.11047	0.10934	0.10937	0.11034	0.11016	0.10934	0.10889	0.11016	0.11183	0.10817	0.10798	0.11185	0.10798	0.10773	0.10746	0.1075	0.10768	0.10746	0.10775	0.10768	0.10736	0.10724	0.10724	0.10763	0.10753	0.10762	0.10717	0.1072	0.10716	0.10687	0.10684	0.10702	0.10736	0.10746	0.10729	0.10743	0.10741	0.1072	0.10693	0.1072	0.10687	0.10693	0.10696	0.10698	0.1077	0.10693	0.10705	0.10706	0.10691
253	0.11278	0.11165	0.11168	0.11265	0.11246	0.11165	0.1112	0.11248	0.11414	0.11049	0.1103	0.11416	0.11028	0.11004	0.10977	0.10983	0.11	0.10979	0.11007	0.11	0.10971	0.10958	0.10958	0.10995	0.10985	0.10993	0.10954	0.10958	0.10953	0.10927	0.10919	0.10941	0.10969	0.10978	0.10962	0.10976	0.10973	0.10954	0.10929	0.10958	0.10922	0.10929	0.10934	0.10934	0.11015	0.1093	0.10944	0.10945	0.10929
254	0.11512	0.11399	0.11402	0.11499	0.1148	0.114	0.11354	0.11482	0.11648	0.11283	0.11264	0.11651	0.11262	0.11238	0.11212	0.11219	0.11235	0.11215	0.11242	0.11234	0.11209	0.11195	0.11195	0.11229	0.1122	0.11227	0.11195	0.11199	0.11194	0.1117	0.11157	0.11183	0.11205	0.11212	0.11197	0.11212	0.11207	0.11191	0.11168	0.112	0.11161	0.11168	0.11175	0.11174	0.11265	0.11171	0.11186	0.11187	0.11169
255	0.11748	0.11636	0.11638	0.11735	0.11715	0.11637	0.11591	0.1172	0.11885	0.1152	0.115	0.11888	0.11498	0.11474	0.11448	0.11458	0.11472	0.11454	0.1148	0.1147	0.11449	0.11434	0.11435	0.11467	0.11458	0.11463	0.11438	0.11443	0.11438	0.11416	0.11398	0.11428	0.11444	0.11449	0.11436	0.1145	0.11444	0.11431	0.1141	0.11445	0.11403	0.11411	0.11418	0.11416	0.11518	0.11415	0.11432	0.11433	0.11413
256	0.11987	0.11875	0.11878	0.11974	0.11954	0.11876	0.1183	0.1196	0.12125	0.11759	0.1174	0.12129	0.11736	0.11713	0.11688	0.117	0.11713	0.11696	0.1172	0.1171	0.11693	0.11676	0.11678	0.11707	0.11698	0.11702	0.11684	0.1169	0.11685	0.11665	0.11642	0.11677	0.11685	0.11689	0.11677	0.11692	0.11684	0.11673	0.11656	0.11693	0.11647	0.11656	0.11665	0.11662	0.11775	0.11663	0.1168	0.11682	0.1166
257	0.12231	0.12119	0.12121	0.12217	0.12197	0.12121	0.12074	0.12205	0.12369	0.12003	0.11984	0.12373	0.11979	0.11956	0.11932	0.11947	0.11958	0.11942	0.11966	0.11954	0.11942	0.11924	0.11926	0.11951	0.11944	0.11945	0.11936	0.11943	0.11938	0.11921	0.11891	0.11931	0.11932	0.11934	0.11923	0.11938	0.11928	0.11921	0.11907	0.11948	0.11897	0.11908	0.11919	0.11913	0.12041	0.11916	0.11935	0.11937	0.11913
258	0.12477	0.12366	0.12369	0.12464	0.12443	0.12368	0.12321	0.12453	0.12616	0.12251	0.12232	0.12621	0.12226	0.12203	0.12179	0.12197	0.12206	0.12193	0.12215	0.12201	0.12196	0.12175	0.12178	0.122	0.12193	0.12192	0.12193	0.12201	0.12195	0.12182	0.12145	0.1219	0.12182	0.12182	0.12172	0.12188	0.12176	0.12172	0.12162	0.12207	0.12151	0.12163	0.12176	0.12169	0.12311	0.12174	0.12195	0.12197	0.12171
259	0.12728	0.12617	0.12619	0.12714	0.12692	0.1262	0.12571	0.12705	0.12867	0.12502	0.12483	0.12873	0.12476	0.12453	0.12431	0.12452	0.12458	0.12447	0.12467	0.12452	0.12453	0.1243	0.12433	0.12452	0.12445	0.12443	0.12454	0.12463	0.12457	0.12447	0.12402	0.12454	0.12436	0.12434	0.12426	0.12442	0.12428	0.12427	0.12422	0.12471	0.1241	0.12423	0.12438	0.12428	0.12587	0.12436	0.12459	0.12462	0.12432
260	0.12982	0.12872	0.12874	0.12968	0.12946	0.12875	0.12826	0.12962	0.13122	0.12757	0.12738	0.13129	0.1273	0.12708	0.12686	0.12711	0.12715	0.12705	0.12724	0.12708	0.12715	0.1269	0.12694	0.12708	0.12702	0.12698	0.1272	0.1273	0.12724	0.12719	0.12665	0.12724	0.12695	0.1269	0.12684	0.127	0.12683	0.12687	0.12687	0.1274	0.12673	0.12688	0.12705	0.12693	0.12871	0.12704	0.1273	0.12732	0.127
261	0.13242	0.13133	0.13135	0.13228	0.13205	0.13137	0.13087	0.13224	0.13383	0.13019	0.13	0.13391	0.1299	0.12968	0.12948	0.12976	0.12978	0.12971	0.12988	0.12969	0.12984	0.12957	0.12962	0.12971	0.12966	0.12958	0.12994	0.13006	0.12999	0.12999	0.12934	0.13002	0.1296	0.12953	0.12948	0.12965	0.12946	0.12954	0.12959	0.13018	0.12944	0.12961	0.1298	0.12966	0.13165	0.12979	0.13008	0.13011	0.12975
262	0.13507	0.13399	0.134	0.13492	0.13469	0.13403	0.13353	0.13491	0.13648	0.13285	0.13266	0.13657	0.13255	0.13234	0.13214	0.13247	0.13245	0.13241	0.13256	0.13235	0.13259	0.13229	0.13235	0.13238	0.13234	0.13224	0.13274	0.13287	0.13281	0.13286	0.1321	0.13286	0.13231	0.13221	0.13218	0.13236	0.13213	0.13226	0.13237	0.13302	0.13221	0.13239	0.13262	0.13245	0.13467	0.13262	0.13293	0.13297	0.13257
263	0.13776	0.13669	0.1367	0.13761	0.13737	0.13674	0.13623	0.13762	0.13918	0.13556	0.13537	0.13928	0.13524	0.13504	0.13486	0.13523	0.13518	0.13517	0.13529	0.13506	0.13539	0.13506	0.13513	0.13511	0.13507	0.13494	0.1356	0.13575	0.13568	0.1358	0.13491	0.13577	0.13507	0.13493	0.13493	0.13511	0.13484	0.13504	0.13521	0.13592	0.13503	0.13524	0.1355	0.13529	0.13777	0.1355	0.13585	0.13589	0.13545
264	0.14052	0.13945	0.13947	0.14036	0.14011	0.13951	0.13899	0.1404	0.14194	0.13833	0.13815	0.14205	0.13799	0.1378	0.13764	0.13806	0.13797	0.138	0.13809	0.13784	0.13827	0.13791	0.13799	0.1379	0.13787	0.13771	0.13854	0.13872	0.13864	0.13883	0.1378	0.13877	0.13789	0.13772	0.13774	0.13793	0.13763	0.13789	0.13814	0.13891	0.13794	0.13817	0.13846	0.13822	0.14098	0.13847	0.13886	0.1389	0.13842
265	0.14334	0.14229	0.1423	0.14318	0.14292	0.14235	0.14182	0.14325	0.14476	0.14118	0.141	0.14488	0.14082	0.14064	0.14049	0.14097	0.14084	0.1409	0.14097	0.14069	0.14124	0.14083	0.14093	0.14076	0.14075	0.14055	0.14158	0.14178	0.1417	0.14198	0.14078	0.14187	0.1408	0.14058	0.14064	0.14083	0.14049	0.14082	0.14115	0.14201	0.14093	0.14119	0.14153	0.14124	0.14434	0.14155	0.14197	0.14202	0.14149
266	0.14622	0.14519	0.1452	0.14606	0.14579	0.14526	0.14473	0.14617	0.14765	0.14409	0.14392	0.14779	0.14372	0.14354	0.14341	0.14396	0.14378	0.14389	0.14392	0.14361	0.14429	0.14384	0.14395	0.1437	0.1437	0.14346	0.14471	0.14494	0.14485	0.14524	0.14384	0.14508	0.14379	0.14352	0.14361	0.14381	0.14342	0.14383	0.14426	0.1452	0.14402	0.14431	0.14469	0.14435	0.14782	0.14472	0.14519	0.14525	0.14465
267	0.14918	0.14816	0.14817	0.14901	0.14873	0.14825	0.1477	0.14917	0.15061	0.14708	0.14691	0.15076	0.14668	0.14652	0.14642	0.14704	0.1468	0.14695	0.14695	0.1466	0.14743	0.14694	0.14707	0.14672	0.14673	0.14645	0.14795	0.14821	0.14811	0.14862	0.147	0.1484	0.14685	0.14654	0.14667	0.14688	0.14643	0.14693	0.14747	0.14851	0.1472	0.14752	0.14796	0.14757	0.15145	0.148	0.14852	0.14858	0.14793
268	0.15221	0.15122	0.15122	0.15204	0.15175	0.15132	0.15076	0.15224	0.15364	0.15016	0.14999	0.15382	0.14973	0.14958	0.14951	0.1502	0.14991	0.15012	0.15007	0.14968	0.15067	0.15013	0.15028	0.14983	0.14985	0.14952	0.1513	0.15159	0.15148	0.15213	0.15027	0.15184	0.15002	0.14964	0.14982	0.15003	0.14953	0.15013	0.15079	0.15193	0.15049	0.15085	0.15135	0.15089	0.15525	0.15141	0.15197	0.15205	0.15132
269	0.15533	0.15437	0.15437	0.15516	0.15486	0.15448	0.15392	0.15542	0.15677	0.15334	0.15318	0.15696	0.15288	0.15275	0.1527	0.15348	0.15313	0.15339	0.1533	0.15287	0.15404	0.15345	0.15361	0.15304	0.15308	0.15269	0.15479	0.15512	0.15501	0.15582	0.15367	0.15545	0.1533	0.15286	0.15308	0.1533	0.15273	0.15345	0.15426	0.15552	0.15392	0.15432	0.1549	0.15436	0.15927	0.15497	0.1556	0.15568	0.15488
270	0.15855	0.15762	0.15762	0.15837	0.15806	0.15774	0.15717	0.15868	0.15998	0.15661	0.15646	0.1602	0.15613	0.15601	0.156	0.15688	0.15645	0.15678	0.15663	0.15616	0.15753	0.15688	0.15707	0.15636	0.15642	0.15597	0.15842	0.1588	0.15868	0.1597	0.15721	0.15922	0.15669	0.15617	0.15645	0.15668	0.15604	0.15689	0.15786	0.15926	0.15748	0.15793	0.15859	0.15797	0.16351	0.15868	0.15938	0.15948	0.15859
271	0.16186	0.16097	0.16096	0.16168	0.16135	0.16111	0.16052	0.16206	0.1633	0.16	0.15985	0.16353	0.15948	0.15938	0.15941	0.1604	0.15988	0.16029	0.16008	0.15956	0.16116	0.16044	0.16065	0.15979	0.15987	0.15935	0.16221	0.16264	0.16251	0.16376	0.16089	0.16316	0.1602	0.15961	0.15995	0.16019	0.15946	0.16046	0.16161	0.16317	0.16119	0.16169	0.16245	0.16172	0.16798	0.16256	0.16334	0.16345	0.16246
272	0.16528	0.16443	0.16442	0.16509	0.16475	0.16458	0.16399	0.16554	0.16671	0.1635	0.16336	0.16697	0.16294	0.16287	0.16294	0.16405	0.16344	0.16393	0.16365	0.16307	0.16494	0.16414	0.16438	0.16334	0.16345	0.16285	0.16616	0.16665	0.16651	0.16803	0.16472	0.16729	0.16385	0.16316	0.16357	0.16382	0.16301	0.16416	0.16552	0.16725	0.16505	0.16562	0.16649	0.16564	0.1727	0.16662	0.16749	0.16761	0.16651
273	0.16882	0.16802	0.16801	0.16862	0.16827	0.16819	0.16759	0.16916	0.17024	0.16714	0.16702	0.17053	0.16654	0.16649	0.16662	0.16786	0.16715	0.16773	0.16737	0.16673	0.16889	0.16801	0.16828	0.16704	0.16718	0.1665	0.17033	0.17089	0.17073	0.17259	0.16875	0.17167	0.16766	0.16686	0.16735	0.16762	0.1667	0.16804	0.16964	0.17157	0.16912	0.16976	0.17076	0.16977	0.17779	0.17093	0.17189	0.17203	0.1708
274	0.17249	0.17175	0.17173	0.17229	0.17192	0.17194	0.17133	0.17291	0.1739	0.17093	0.17082	0.17422	0.17027	0.17026	0.17045	0.17184	0.17101	0.1717	0.17124	0.17054	0.17303	0.17206	0.17236	0.1709	0.17107	0.17029	0.17471	0.17535	0.17518	0.17744	0.17299	0.1763	0.17164	0.17072	0.17131	0.17158	0.17055	0.17211	0.17398	0.17614	0.1734	0.17412	0.17527	0.17412	0.18325	0.17548	0.17655	0.17672	0.17534
275	0.1763	0.17563	0.1756	0.17609	0.17571	0.17584	0.17522	0.17681	0.1777	0.17488	0.17478	0.17806	0.17417	0.17419	0.17446	0.17601	0.17504	0.17586	0.17529	0.17451	0.17739	0.17631	0.17665	0.17493	0.17513	0.17425	0.17935	0.18008	0.17989	0.18265	0.17746	0.18124	0.17581	0.17475	0.17545	0.17573	0.17457	0.17637	0.17857	0.18099	0.17792	0.17873	0.18006	0.17871	0.18915	0.18031	0.18151	0.18171	0.18017
276	0.18027	0.17968	0.17965	0.18005	0.17965	0.17992	0.17929	0.18089	0.18165	0.17901	0.17893	0.18205	0.17824	0.17831	0.17866	0.1804	0.17927	0.18024	0.17954	0.17868	0.18199	0.18079	0.18119	0.17915	0.17939	0.17839	0.18429	0.18513	0.18491	0.18829	0.18221	0.18653	0.18019	0.17898	0.1798	0.18009	0.17879	0.18087	0.18345	0.18618	0.18272	0.18364	0.18518	0.18361	0.19559	0.1855	0.18684	0.18707	0.18534
277	0.18441	0.18391	0.18387	0.18419	0.18377	0.18418	0.18354	0.18515	0.18577	0.18334	0.18328	0.18621	0.1825	0.18262	0.18307	0.18503	0.18372	0.18485	0.18401	0.18305	0.18687	0.18553	0.18598	0.18359	0.18388	0.18275	0.18955	0.19052	0.19028	0.19441	0.18726	0.19223	0.18482	0.18343	0.18439	0.1847	0.18323	0.18562	0.18866	0.19174	0.18783	0.18888	0.19068	0.18882	0.20265	0.19107	0.19257	0.19284	0.19089
278	0.18875	0.18836	0.18831	0.18851	0.18807	0.18865	0.18801	0.18962	0.19007	0.18791	0.18787	0.19056	0.18699	0.18717	0.18773	0.18993	0.18842	0.18973	0.18873	0.18767	0.19206	0.19057	0.19108	0.18828	0.18862	0.18734	0.19521	0.19633	0.19606	0.20116	0.19268	0.19842	0.18973	0.18812	0.18926	0.18957	0.18791	0.19069	0.19426	0.19775	0.19332	0.19452	0.19663	0.19442	0.2105	0.19711	0.1988	0.19912	0.19692
279	0.19329	0.19303	0.19297	0.19305	0.19259	0.19336	0.19272	0.19432	0.19458	0.19272	0.19272	0.19512	0.19171	0.19196	0.19267	0.19514	0.19339	0.19492	0.19372	0.19254	0.19761	0.19594	0.19653	0.19325	0.19365	0.19219	0.20132	0.20262	0.20231	0.20864	0.19853	0.20518	0.19495	0.19309	0.19444	0.19475	0.19288	0.19609	0.2003	0.20427	0.19924	0.20062	0.20311	0.20047	0.21926	0.20369	0.2056	0.20599	0.2035
280	0.19807	0.19796	0.19789	0.19782	0.19734	0.19833	0.19769	0.19927	0.19931	0.19783	0.19785	0.19991	0.19671	0.19705	0.19792	0.20071	0.19869	0.20047	0.19903	0.19772	0.20357	0.20171	0.20238	0.19853	0.199	0.19734	0.20795	0.20947	0.20913	0.21706	0.20487	0.21264	0.20053	0.19839	0.19997	0.20029	0.19817	0.20189	0.20687	0.21142	0.20566	0.20726	0.21022	0.20705	0.22921	0.21094	0.21311	0.21358	0.21074
281	0.20311	0.20318	0.2031	0.20285	0.20235	0.20359	0.20296	0.20452	0.20429	0.20325	0.20332	0.20496	0.20202	0.20247	0.20353	0.20668	0.20433	0.20641	0.2047	0.20324	0.21001	0.20792	0.20869	0.20416	0.20471	0.20284	0.21521	0.21699	0.2166	0.22662	0.21179	0.22093	0.20651	0.20404	0.2059	0.20622	0.20382	0.20814	0.21406	0.2193	0.21268	0.21453	0.21808	0.21424	0.24058	0.21898	0.22146	0.22202	0.21878
282	0.20844	0.20872	0.20863	0.20818	0.20766	0.20919	0.20857	0.21008	0.20955	0.20905	0.20917	0.2103	0.20769	0.20826	0.20956	0.21312	0.2104	0.21282	0.21078	0.20915	0.217	0.21466	0.21554	0.21021	0.21085	0.20873	0.2232	0.22531	0.22487	0.23766	0.21941	0.23025	0.21297	0.21011	0.21231	0.21263	0.20989	0.21493	0.22201	0.22807	0.22041	0.22258	0.22688	0.22217	0.25379	0.228	0.23083	0.23152	0.2278
283	0.21411	0.21464	0.21453	0.21383	0.2133	0.21516	0.21457	0.21601	0.21513	0.21527	0.21546	0.21596	0.21376	0.21448	0.21607	0.2201	0.21694	0.21977	0.21734	0.21552	0.22466	0.22202	0.22304	0.21673	0.21749	0.21507	0.23209	0.2346	0.2341	0.25066	0.22788	0.24085	0.22	0.21666	0.21927	0.21957	0.21645	0.22235	0.23086	0.23792	0.22901	0.23157	0.23683	0.231	0.2694	0.23824	0.2415	0.24236	0.23806
284	0.22015	0.22098	0.22086	0.21987	0.21932	0.22156	0.22101	0.22236	0.22107	0.22199	0.22225	0.22199	0.22031	0.22121	0.22315	0.22772	0.22403	0.22736	0.22446	0.22242	0.23309	0.23011	0.23131	0.22381	0.22469	0.22195	0.24207	0.24509	0.2445	0.26627	0.2374	0.25308	0.22768	0.22378	0.22689	0.22716	0.22359	0.23053	0.24083	0.24912	0.23868	0.24173	0.24824	0.24092	0.28815	0.25003	0.2538	0.25489	0.24988
285	0.22661	0.22781	0.22767	0.22633	0.22577	0.22846	0.22796	0.22919	0.2274	0.22928	0.22963	0.22844	0.22739	0.22852	0.23091	0.23611	0.23179	0.2357	0.23222	0.22994	0.24246	0.23908	0.24049	0.23154	0.23258	0.22945	0.2534	0.25705	0.25637	0.28551	0.24823	0.26741	0.23614	0.23156	0.23528	0.2355	0.23141	0.23961	0.2522	0.26202	0.24967	0.25334	0.26152	0.25221	0.31115	0.26383	0.26819	0.2696	0.26374
286	0.23357	0.2352	0.23503	0.23329	0.23271	0.23593	0.23551	0.23656	0.2342	0.23724	0.23771	0.23536	0.23513	0.23653	0.23947	0.2454	0.24032	0.24494	0.24075	0.23819	0.25296	0.24913	0.2508	0.24005	0.24127	0.23769	0.26642	0.27087	0.27008	0.30991	0.2607	0.28451	0.24554	0.24013	0.24462	0.24475	0.24005	0.24981	0.26534	0.27709	0.26235	0.26682	0.27726	0.26523	0.33997	0.28026	0.28535	0.28719	0.28028
287	0.2411	0.24325	0.24305	0.24081	0.24024	0.24407	0.24376	0.24457	0.24153	0.24601	0.24662	0.24283	0.24362	0.24538	0.249	0.25578	0.24979	0.25527	0.2502	0.24733	0.26485	0.26049	0.2625	0.24947	0.25092	0.24683	0.28158	0.28706	0.28615	0.34183	0.27531	0.30532	0.25608	0.24965	0.2551	0.2551	0.24966	0.26137	0.28077	0.29495	0.27718	0.28271	0.29629	0.28043	0.37688	0.30022	0.30619	0.30866	0.30044
288	0.24927	0.25206	0.25184	0.24899	0.24843	0.25299	0.25284	0.25331	0.24946	0.25572	0.25651	0.25092	0.25302	0.25522	0.25973	0.26749	0.26039	0.26692	0.26075	0.25752	0.27845	0.27348	0.27592	0.26002	0.26174	0.25705	0.29948	0.30632	0.30526	0.38501	0.2927	0.3312	0.26802	0.26033	0.267	0.2668	0.26048	0.27466	0.29921	0.31652	0.29486	0.3018	0.3198	0.29849	0.42509	0.32504	0.33203	0.33542	0.32557
289	0.25821	0.26179	0.26153	0.25794	0.25742	0.26283	0.26289	0.26292	0.2581	0.26659	0.2676	0.25973	0.26352	0.2663	0.27194	0.28084	0.27236	0.28021	0.27264	0.26901	0.29419	0.28852	0.29153	0.27194	0.274	0.26859	0.32098	0.3296	0.32837	0.44511	0.31382	0.36414	0.28171	0.27242	0.28066	0.28015	0.27279	0.29012	0.32165	0.34302	0.31633	0.32518	0.34957	0.32031	0.48878	0.35663	0.36482	0.36956	0.35769
290	0.26805	0.27259	0.27229	0.2678	0.26734	0.27376	0.27413	0.27355	0.26757	0.27885	0.28016	0.2694	0.27536	0.27888	0.286	0.29623	0.28603	0.29554	0.28617	0.2821	0.31263	0.30618	0.30994	0.28553	0.28802	0.28177	0.34721	0.35818	0.35679	0.52951	0.33999	0.40698	0.29759	0.28628	0.29657	0.29558	0.28696	0.30838	0.34956	0.37622	0.34294	0.35447	0.38811	0.34717	0.57201	0.3978	0.40729	0.41403	0.39968
291	0.27896	0.2847	0.28433	0.27874	0.27837	0.28601	0.28679	0.28539	0.27801	0.29284	0.29451	0.28006	0.28886	0.29335	0.30243	0.31418	0.30183	0.31343	0.30174	0.29718	0.33452	0.32719	0.33199	0.30123	0.30425	0.29702	0.37974	0.39383	0.3923	0.64331	0.37313	0.46358	0.31626	0.30234	0.31534	0.31363	0.30349	0.33031	0.38497	0.41846	0.37666	0.3919	0.43893	0.38082	0.67443	0.45242	0.46316	0.47274	0.45551
292	0.29113	0.29837	0.29793	0.29097	0.29075	0.29985	0.3012	0.29868	0.2896	0.30897	0.31112	0.29189	0.30443	0.31022	0.32193	0.33538	0.3203	0.33458	0.31986	0.31477	0.36083	0.35258	0.35881	0.31958	0.32327	0.31488	0.42064	0.43879	0.43722	0.77582	0.4159	0.53818	0.33852	0.32121	0.33785	0.33503	0.32306	0.35708	0.43072	0.47275	0.4202	0.44056	0.50606	0.42366	0.78258	0.52503	0.53667	0.54983	0.52965
293	0.30482	0.31395	0.31343	0.30475	0.30475	0.31561	0.31775	0.3137	0.30256	0.32778	0.33054	0.30511	0.32262	0.33015	0.34542	0.36073	0.34218	0.35991	0.34118	0.33556	0.39281	0.38366	0.3919	0.34129	0.34586	0.33611	0.47242	0.49563	0.49424	0.88709	0.47178	0.63264	0.36543	0.34369	0.36525	0.36074	0.34659	0.39028	0.49034	0.542	0.47708	0.50408	0.59207	0.47864	0.86697	0.61835	0.62995	0.64638	0.62427
294	0.32035	0.33187	0.33123	0.3204	0.32073	0.33372	0.33698	0.33081	0.31715	0.34997	0.35355	0.31999	0.34415	0.35406	0.37417	0.39136	0.36842	0.3906	0.36656	0.36045	0.432	0.42216	0.43316	0.3673	0.373	0.36167	0.53744	0.5663	0.56546	0.93582	0.54433	0.73911	0.3984	0.37085	0.39909	0.39199	0.37529	0.43194	0.56697	0.6268	0.55081	0.58511	0.69266	0.5486	0.90334	0.72618	0.73612	0.7528	0.73184
295	0.3381	0.35266	0.35188	0.33834	0.33915	0.35472	0.35952	0.35045	0.33372	0.37644	0.38108	0.33685	0.37	0.38315	0.40984	0.4287	0.40023	0.42812	0.39708	0.39062	0.48007	0.47002	0.48468	0.3988	0.40596	0.39286	0.61598	0.64958	0.64977	0.92509	0.63434	0.83346	0.43914	0.40406	0.44128	0.43032	0.41077	0.48433	0.65985	0.72035	0.64183	0.68094	0.79002	0.63375	0.89495	0.82539	0.83202	0.84337	0.82815
296	0.35856	0.37699	0.37601	0.35906	0.36057	0.37925	0.3862	0.37313	0.35266	0.40832	0.41434	0.35607	0.40141	0.41895	0.45442	0.47427	0.43907	0.47408	0.43402	0.4275	0.53827	0.52897	0.54797	0.43724	0.44627	0.43125	0.70243	0.73669	0.73825	0.88344	0.73348	0.88699	0.48944	0.44501	0.49385	0.47743	0.45494	0.549	0.75766	0.80438	0.74104	0.77691	0.85733	0.72667	0.86003	0.88519	0.88816	0.89082	0.88368
297	0.38229	0.40563	0.40439	0.38318	0.38567	0.40807	0.41798	0.39945	0.37445	0.44687	0.45465	0.37811	0.4399	0.46325	0.50979	0.52931	0.48644	0.52976	0.4787	0.47268	0.60608	0.599	0.62189	0.4841	0.49543	0.47857	0.78182	0.80974	0.81236	0.82877	0.81969	0.89231	0.55045	0.49549	0.55798	0.53461	0.50966	0.62459	0.83642	0.85654	0.82566	0.84777	0.87968	0.80853	0.81211	0.89489	0.89542	0.89114	0.89031
298	0.40996	0.43945	0.43785	0.4114	0.41526	0.442	0.45589	0.43005	0.39965	0.49332	0.50325	0.40345	0.48712	0.51765	0.57644	0.59355	0.54326	0.59491	0.53208	0.52743	0.679	0.6757	0.69967	0.5404	0.55428	0.53607	0.83475	0.85065	0.85345	0.76857	0.86824	0.86417	0.62086	0.55658	0.63187	0.60143	0.57557	0.70356	0.87438	0.868	0.87142	0.87571	0.86426	0.85739	0.75818	0.86861	0.86809	0.86026	0.86275
299	0.44225	0.47921	0.47715	0.44445	0.45017	0.48175	0.50075	0.46549	0.42883	0.54815	0.56047	0.4326	0.54412	0.58227	0.65099	0.66329	0.60852	0.66563	0.59363	0.59148	0.74669	0.74783	0.76768	0.60534	0.62143	0.60307	0.8512	0.85481	0.85702	0.7064	0.87274	0.81875	0.69436	0.62689	0.70778	0.67343	0.64969	0.77132	0.87039	0.8475	0.87332	0.86444	0.82657	0.86561	0.70182	0.82371	0.8229	0.81356	0.81751
300	0.47974	0.52522	0.52262	0.48293	0.49104	0.52756	0.55258	0.50602	0.46251	0.60991	0.62439	0.46596	0.60996	0.65359	0.72367	0.72963	0.67717	0.73259	0.65967	0.66097	0.79562	0.80009	0.81101	0.67423	0.69107	0.6746	0.8363	0.83115	0.83256	0.64394	0.84564	0.76498	0.75878	0.69992	0.7717	0.74044	0.72281	0.81291	0.83856	0.80826	0.84455	0.82881	0.7774	0.8426	0.64485	0.76988	0.76914	0.75923	0.76371
301	0.52255	0.57668	0.57352	0.52697	0.53789	0.57854	0.6095	0.55118	0.50091	0.67343	0.68899	0.50361	0.67933	0.72224	0.77982	0.78006	0.73903	0.78287	0.72195	0.72663	0.81679	0.82225	0.82321	0.73721	0.75213	0.73988	0.80147	0.79105	0.79174	0.58195	0.80139	0.70738	0.80068	0.76309	0.80978	0.78903	0.78037	0.82284	0.79207	0.75919	0.79939	0.78053	0.72251	0.80158	0.58817	0.71193	0.71146	0.70146	0.70593
302	0.56984	0.63064	0.6271	0.57557	0.58929	0.63174	0.66656	0.59915	0.54354	0.72945	0.74407	0.54494	0.74142	0.77479	0.80806	0.80504	0.78204	0.80698	0.76928	0.77581	0.81077	0.81528	0.80861	0.78204	0.79233	0.7856	0.75559	0.7421	0.74221	0.52083	0.7485	0.6483	0.81364	0.80289	0.8173	0.81024	0.81037	0.80636	0.73821	0.7052	0.74602	0.7259	0.665	0.75116	0.53218	0.65235	0.65228	0.64242	0.64659
303	0.6191	0.68157	0.6781	0.62594	0.64157	0.68171	0.71593	0.64633	0.58877	0.76761	0.77906	0.58831	0.78356	0.80065	0.80667	0.80308	0.79867	0.80385	0.79288	0.79895	0.78441	0.78713	0.77588	0.80055	0.80503	0.80334	0.70394	0.68869	0.68832	0.4608	0.69143	0.58898	0.80052	0.81289	0.79916	0.80409	0.81029	0.77242	0.68091	0.64902	0.68875	0.66834	0.60657	0.69611	0.47709	0.59246	0.59286	0.58325	0.58696
304	0.66566	0.72204	0.71926	0.6729	0.68849	0.72128	0.74923	0.68735	0.63322	0.78186	0.78889	0.63056	0.79837	0.79849	0.78256	0.78	0.79004	0.77972	0.79132	0.79525	0.74535	0.74614	0.73244	0.79327	0.79261	0.79435	0.64941	0.63318	0.6324	0.40214	0.63251	0.53002	0.76928	0.79691	0.76418	0.77756	0.78682	0.72822	0.62215	0.59209	0.62978	0.60962	0.54807	0.63889	0.42298	0.53291	0.53381	0.52452	0.52766
305	0.70336	0.74563	0.74406	0.70994	0.72286	0.74427	0.76158	0.71652	0.67201	0.77304	0.77568	0.66727	0.78729	0.77437	0.74403	0.7431	0.76255	0.74201	0.76935	0.77059	0.6989	0.69789	0.68294	0.76648	0.76216	0.76569	0.59365	0.57693	0.57578	0.34529	0.57302	0.47179	0.72701	0.76318	0.71931	0.73819	0.74848	0.67824	0.56307	0.53519	0.57034	0.55071	0.49002	0.58093	0.37004	0.47408	0.4755	0.46655	0.46909
306	0.72656	0.74976	0.74959	0.73138	0.73948	0.74823	0.7536	0.72997	0.69986	0.74669	0.74574	0.69377	0.75741	0.73611	0.69705	0.69792	0.72304	0.69622	0.73365	0.7324	0.64826	0.64559	0.6301	0.7272	0.72052	0.72477	0.53758	0.52068	0.51919	0.29105	0.51367	0.41458	0.67832	0.71887	0.66878	0.69124	0.70146	0.62508	0.50426	0.47877	0.51111	0.49216	0.43276	0.52299	0.3187	0.41629	0.4182	0.40964	0.41159
307	0.73235	0.7361	0.73715	0.73479	0.73718	0.73475	0.72946	0.72692	0.71301	0.70876	0.70513	0.70664	0.7158	0.68948	0.64526	0.64796	0.67636	0.64578	0.68952	0.68616	0.5954	0.59121	0.57558	0.68051	0.67234	0.67669	0.48177	0.46487	0.46308	0.24073	0.45494	0.3588	0.62604	0.66854	0.61516	0.64001	0.64956	0.57033	0.44614	0.42314	0.45252	0.43437	0.37668	0.46555	0.26973	0.35997	0.3623	0.35418	0.35559
308	0.72164	0.7088	0.71076	0.72163	0.71869	0.70783	0.69415	0.70955	0.71064	0.66362	0.65801	0.70501	0.6672	0.63792	0.59076	0.59528	0.62544	0.59273	0.64033	0.63518	0.54148	0.53589	0.52035	0.62945	0.62034	0.62444	0.42657	0.40985	0.40779	0.19605	0.39726	0.30515	0.57181	0.61479	0.55993	0.58639	0.59493	0.51493	0.38912	0.36867	0.395	0.37777	0.32241	0.40898	0.22444	0.30583	0.30847	0.3009	0.30184
309	0.69743	0.67199	0.67457	0.69529	0.68803	0.67147	0.65155	0.68109	0.69433	0.61415	0.60706	0.69014	0.61457	0.58362	0.53494	0.54126	0.57219	0.53839	0.58824	0.58155	0.48726	0.48037	0.46507	0.57597	0.5663	0.56992	0.3724	0.35607	0.35377	0.15867	0.34121	0.25476	0.51674	0.55929	0.50408	0.53164	0.53897	0.45952	0.33378	0.31597	0.33914	0.323	0.27096	0.35378	0.18442	0.25504	0.2578	0.25096	0.25153
310	0.66336	0.62894	0.63192	0.65955	0.64904	0.62889	0.60441	0.64474	0.66695	0.56221	0.554	0.66453	0.55976	0.52794	0.47867	0.48673	0.5178	0.4836	0.53465	0.52662	0.43325	0.4252	0.41024	0.52132	0.51133	0.51435	0.31987	0.30419	0.30173	0.12951	0.28773	0.20919	0.46151	0.50306	0.44827	0.47655	0.48259	0.40462	0.28108	0.266	0.28585	0.27109	0.22376	0.30071	0.15111	0.20917	0.21184	0.20594	0.20624
311	0.62259	0.58191	0.58514	0.6175	0.60459	0.58232	0.55449	0.60304	0.63158	0.50893	0.49988	0.63097	0.50387	0.47176	0.42261	0.43228	0.46303	0.42894	0.4804	0.47121	0.37993	0.37092	0.35644	0.46627	0.45614	0.4585	0.26994	0.25529	0.25278	0.10822	0.23817	0.17015	0.40669	0.44681	0.39306	0.4217	0.42642	0.35082	0.23242	0.22018	0.23653	0.22353	0.18256	0.25097	0.12517	0.16995	0.17231	0.16753	0.16767
312	0.57739	0.53241	0.53578	0.57132	0.55665	0.53324	0.50294	0.55779	0.59065	0.45512	0.44543	0.59178	0.4477	0.41575	0.36743	0.37848	0.4085	0.37498	0.42615	0.41598	0.32794	0.31826	0.30447	0.41146	0.40133	0.40303	0.22401	0.21087	0.20847	0.093442	0.1943	0.13886	0.3529	0.39114	0.33914	0.36767	0.37111	0.299	0.18956	0.1802	0.19292	0.18209	0.14877	0.20616	0.10617	0.13857	0.14048	0.13688	0.13694
313	0.52935	0.48149	0.48494	0.52254	0.50658	0.48272	0.45063	0.51028	0.546	0.40146	0.39135	0.54875	0.39197	0.36066	0.314	0.32604	0.3549	0.32247	0.37252	0.36163	0.27823	0.26829	0.25552	0.35755	0.34759	0.34868	0.18372	0.17257	0.17042	0.083557	0.15773	0.11542	0.301	0.33681	0.2875	0.31525	0.3175	0.25039	0.15405	0.14742	0.15664	0.14819	0.12289	0.16795	0.092907	0.11512	0.11655	0.11401	0.11405
314	0.47958	0.42996	0.43344	0.47222	0.45534	0.43154	0.3983	0.46143	0.4989	0.34869	0.33838	0.50314	0.3375	0.30743	0.26355	0.27599	0.30312	0.27247	0.32031	0.30904	0.23211	0.22248	0.21115	0.30543	0.29586	0.29642	0.15048	0.14159	0.1398	0.07716	0.12929	0.098853	0.25224	0.28485	0.23951	0.26556	0.26677	0.20659	0.12662	0.12229	0.12848	0.12233	0.10426	0.13747	0.083991	0.098577	0.099587	0.097894	0.097929
315	0.42896	0.37855	0.382	0.42121	0.40377	0.38044	0.3467	0.41199	0.45035	0.29776	0.28756	0.45594	0.28541	0.25738	0.21768	0.22975	0.2544	0.22643	0.27063	0.25947	0.19122	0.18249	0.17302	0.25635	0.24744	0.2476	0.12484	0.11816	0.11677	0.073223	0.10858	0.087615	0.20823	0.23672	0.19684	0.22012	0.22051	0.16924	0.10675	0.10417	0.10801	0.10379	0.091457	0.11475	0.078214	0.087375	0.088062	0.086986	0.087027
316	0.37829	0.3281	0.33147	0.37032	0.35269	0.33022	0.29684	0.36269	0.40119	0.24999	0.24026	0.40796	0.2372	0.21218	0.17812	0.18899	0.21036	0.18605	0.22497	0.2145	0.15705	0.14971	0.14231	0.2119	0.20398	0.20389	0.10624	0.10143	0.10039	0.071039	0.094258	0.080236	0.17062	0.19414	0.16109	0.18061	0.18043	0.13941	0.093043	0.091686	0.09387	0.091084	0.082949	0.098737	0.074687	0.08003	0.080483	0.079838	0.079887
317	0.32846	0.27972	0.28291	0.32047	0.30312	0.28196	0.25001	0.31442	0.35226	0.207	0.19816	0.36	0.19462	0.17355	0.14614	0.15517	0.17264	0.15275	0.18502	0.17582	0.13032	0.12457	0.11915	0.17377	0.16712	0.16693	0.093363	0.08999	0.089229	0.070113	0.084694	0.0756	0.14052	0.15869	0.13306	0.14836	0.14787	0.11707	0.083915	0.083375	0.084433	0.082671	0.077507	0.087891	0.072781	0.075421	0.075705	0.075365	0.07542
318	0.28061	0.23482	0.23773	0.27287	0.25637	0.23705	0.20781	0.26832	0.30457	0.17036	0.16281	0.31299	0.15924	0.14263	0.12195	0.12891	0.14235	0.12704	0.15215	0.14464	0.11066	0.1064	0.10264	0.14309	0.13786	0.13767	0.084763	0.082435	0.081881	0.070089	0.078534	0.072921	0.11793	0.13111	0.11244	0.12372	0.12314	0.10124	0.078058	0.078063	0.078361	0.077316	0.074254	0.080797	0.072045	0.072764	0.072927	0.072801	0.072863
319	0.23617	0.19502	0.19752	0.22898	0.214	0.19709	0.17179	0.2258	0.25938	0.14111	0.13501	0.26807	0.13178	0.11949	0.10473	0.10976	0.11959	0.1084	0.12686	0.12113	0.096941	0.093895	0.091381	0.12	0.1161	0.11599	0.079242	0.077662	0.077258	0.070708	0.074778	0.071638	0.10194	0.11099	0.098054	0.10601	0.10545	0.090488	0.074511	0.074887	0.074664	0.074125	0.072558	0.076368	0.072148	0.071498	0.071572	0.0716	0.071666
320	0.19673	0.16171	0.16374	0.19041	0.17756	0.1635	0.14294	0.1884	0.21818	0.11922	0.11454	0.22666	0.1118	0.10316	0.092998	0.096491	0.10345	0.095525	0.10857	0.10441	0.087733	0.085598	0.083978	0.10362	0.10081	0.10079	0.075916	0.074872	0.074577	0.071786	0.072729	0.071354	0.091084	0.097059	0.088408	0.09386	0.093382	0.083441	0.072609	0.073239	0.072657	0.072477	0.071977	0.073832	0.072852	0.071226	0.071238	0.071374	0.071443
321	0.16369	0.13559	0.13713	0.15848	0.14814	0.13704	0.12128	0.15739	0.18248	0.10375	0.10024	0.19024	0.097997	0.092116	0.085292	0.087636	0.092485	0.086966	0.095973	0.093049	0.081783	0.080308	0.079321	0.092491	0.090504	0.090568	0.074162	0.073504	0.073287	0.073191	0.071901	0.071785	0.083978	0.087778	0.08217	0.085827	0.085432	0.079034	0.071885	0.07269	0.071857	0.071933	0.072195	0.072652	0.073988	0.071666	0.071633	0.071847	0.071918
322	0.13775	0.11635	0.11745	0.1337	0.12586	0.11746	0.10591	0.13325	0.15334	0.093255	0.090637	0.15999	0.088817	0.084908	0.08044	0.08195	0.085303	0.081493	0.087614	0.085597	0.078156	0.077157	0.07662	0.085199	0.083797	0.083932	0.073536	0.073155	0.072995	0.07483	0.071946	0.072727	0.079539	0.081816	0.07835	0.080729	0.080409	0.076512	0.072002	0.072927	0.071921	0.072179	0.072984	0.072441	0.075434	0.072615	0.07255	0.072819	0.07289
323	0.11861	0.1029	0.10365	0.11561	0.10994	0.10371	0.095452	0.11557	0.13103	0.086402	0.084434	0.13639	0.082936	0.080416	0.077615	0.078521	0.080813	0.078216	0.082288	0.080923	0.07619	0.075537	0.075321	0.080637	0.079648	0.079839	0.073719	0.073537	0.073418	0.076635	0.072612	0.074034	0.077	0.078203	0.076254	0.077721	0.07746	0.075339	0.07272	0.073728	0.072602	0.072988	0.074181	0.072924	0.077102	0.073927	0.07384	0.074147	0.074218
324	0.10519	0.093859	0.094354	0.10304	0.099056	0.09444	0.088612	0.10323	0.11488	0.082147	0.080646	0.11903	0.07939	0.077854	0.076237	0.076705	0.078243	0.076509	0.079123	0.078227	0.075418	0.075013	0.075026	0.078017	0.077324	0.077558	0.07448	0.074442	0.074352	0.078558	0.073722	0.075601	0.075821	0.076264	0.075393	0.076207	0.075994	0.075134	0.073867	0.074932	0.073722	0.0742	0.075668	0.073902	0.078928	0.075497	0.075395	0.07573	0.075799
325	0.096187	0.088043	0.088358	0.094663	0.091915	0.088455	0.08437	0.094974	0.10374	0.079749	0.078584	0.10687	0.077508	0.07667	0.075892	0.076045	0.077047	0.075928	0.077503	0.076943	0.075499	0.075273	0.075449	0.076787	0.076304	0.076571	0.075655	0.075719	0.075652	0.080564	0.075149	0.077354	0.075615	0.075521	0.075415	0.075762	0.075587	0.07562	0.07532	0.076423	0.075156	0.075699	0.077362	0.075233	0.080869	0.077252	0.077139	0.077493	0.077561
326	0.090402	0.084533	0.084721	0.089331	0.087467	0.084823	0.081981	0.089704	0.096372	0.078674	0.077751	0.098721	0.076807	0.076464	0.076282	0.076208	0.076829	0.076147	0.076984	0.076665	0.07619	0.076091	0.076382	0.076547	0.076212	0.076504	0.077125	0.077263	0.077211	0.082631	0.076799	0.079238	0.076101	0.075628	0.076063	0.076079	0.075932	0.076597	0.076989	0.07812	0.076811	0.077401	0.079203	0.076816	0.082892	0.079136	0.079018	0.079385	0.07945
327	0.086921	0.082668	0.082767	0.086172	0.084939	0.082868	0.080913	0.086576	0.091751	0.078543	0.077793	0.093521	0.076947	0.076953	0.077192	0.076957	0.077307	0.076936	0.077248	0.077101	0.077313	0.077305	0.077679	0.07701	0.076782	0.077091	0.078805	0.078996	0.078955	0.084743	0.078608	0.081215	0.07708	0.076339	0.077157	0.076938	0.076811	0.077925	0.078813	0.079962	0.078625	0.079247	0.081149	0.078577	0.084977	0.081114	0.080992	0.081369	0.08143
328	0.085075	0.08197	0.082005	0.084556	0.083771	0.082106	0.080782	0.084973	0.089089	0.079079	0.078452	0.090438	0.077678	0.077933	0.07847	0.07812	0.078277	0.078127	0.078067	0.078042	0.078743	0.0788	0.079232	0.077969	0.077817	0.078139	0.080633	0.080864	0.08083	0.086888	0.080529	0.08326	0.078407	0.077477	0.078565	0.078179	0.078067	0.079499	0.080745	0.081909	0.080549	0.081195	0.083169	0.080464	0.087107	0.083158	0.083034	0.083419	0.083475
329	0.084391	0.082103	0.082093	0.084036	0.08357	0.082192	0.081318	0.084459	0.087822	0.080089	0.079551	0.088866	0.078829	0.079259	0.080009	0.079578	0.079596	0.079605	0.079279	0.079341	0.080392	0.080494	0.080968	0.079282	0.079184	0.079514	0.082569	0.082827	0.0828	0.08906	0.082529	0.085354	0.079981	0.078917	0.080198	0.079692	0.079591	0.081251	0.082754	0.083931	0.082553	0.083217	0.085244	0.082442	0.089275	0.08525	0.085127	0.085517	0.085569
330	0.084536	0.082826	0.082784	0.084298	0.084058	0.082882	0.082327	0.084721	0.087551	0.081436	0.080962	0.088374	0.080278	0.080833	0.081733	0.081246	0.081164	0.081288	0.080771	0.080895	0.082197	0.08233	0.082835	0.080846	0.080787	0.081121	0.084581	0.084861	0.084837	0.091255	0.084588	0.087485	0.081732	0.080572	0.08199	0.081399	0.081305	0.083128	0.084821	0.086008	0.084614	0.085292	0.08736	0.084484	0.091474	0.087379	0.087257	0.087652	0.087698
331	0.085274	0.083973	0.083909	0.085118	0.085038	0.084005	0.083676	0.085541	0.087993	0.083025	0.082596	0.088659	0.08194	0.082584	0.083591	0.083065	0.082911	0.083117	0.082464	0.082631	0.084115	0.08427	0.084797	0.08259	0.082559	0.082896	0.08665	0.086947	0.086926	0.093472	0.086689	0.089646	0.08361	0.082381	0.083897	0.083246	0.083155	0.085096	0.086929	0.088127	0.086718	0.087407	0.089509	0.086575	0.093701	0.089537	0.089418	0.089817	0.089857
332	0.086431	0.085419	0.085339	0.086333	0.086365	0.085435	0.085265	0.086755	0.08894	0.084785	0.08439	0.089492	0.083753	0.08446	0.085544	0.084991	0.084785	0.08505	0.0843	0.084497	0.086114	0.086283	0.086827	0.084461	0.084451	0.084788	0.088762	0.089072	0.089054	0.09571	0.088822	0.091833	0.085579	0.084299	0.085886	0.085192	0.085103	0.087131	0.089071	0.09028	0.088855	0.089554	0.091684	0.088703	0.095954	0.09172	0.091605	0.092007	0.092041
333	0.087888	0.08708	0.086989	0.08783	0.087941	0.087084	0.087027	0.088251	0.090248	0.086668	0.086297	0.090721	0.085674	0.086426	0.087565	0.086996	0.08675	0.08706	0.086239	0.086456	0.088173	0.088352	0.088908	0.086425	0.086431	0.086766	0.090909	0.091229	0.091212	0.097969	0.090983	0.094042	0.087614	0.086297	0.087936	0.087211	0.087121	0.089215	0.091239	0.092461	0.091018	0.091727	0.093882	0.090861	0.098233	0.093926	0.093814	0.09422	0.094246
334	0.089546	0.088886	0.088787	0.089518	0.089685	0.088882	0.088906	0.08994	0.0918	0.088637	0.088283	0.092216	0.087669	0.088454	0.089635	0.089055	0.088778	0.089123	0.088248	0.088479	0.090276	0.090459	0.091026	0.088453	0.08847	0.088803	0.093082	0.093413	0.093397	0.10025	0.093165	0.096273	0.089696	0.088349	0.090028	0.08928	0.089188	0.091335	0.093429	0.094666	0.093204	0.093922	0.096103	0.093043	0.10054	0.096152	0.096045	0.096455	0.096473
335	0.091352	0.090799	0.090694	0.091345	0.091553	0.09079	0.090872	0.091769	0.093531	0.090668	0.090327	0.093906	0.089719	0.090529	0.091742	0.091156	0.090855	0.091227	0.090311	0.090551	0.092413	0.092599	0.093175	0.090529	0.090555	0.090884	0.09528	0.09562	0.095605	0.10256	0.095367	0.098526	0.091815	0.090443	0.092154	0.091389	0.091293	0.093485	0.09564	0.096894	0.09541	0.096138	0.098345	0.095247	0.10288	0.098399	0.098298	0.098712	0.098721
336	0.093268	0.092793	0.092684	0.093276	0.093513	0.092781	0.092905	0.093704	0.095394	0.092749	0.092416	0.095742	0.091811	0.092641	0.09388	0.093292	0.092971	0.093365	0.092416	0.092661	0.094579	0.094766	0.09535	0.092643	0.092676	0.093002	0.097502	0.097851	0.097836	0.10489	0.09759	0.1008	0.093964	0.09257	0.094309	0.09353	0.09343	0.095662	0.097873	0.099146	0.097638	0.098375	0.10061	0.097472	0.10524	0.10067	0.10057	0.10099	0.10099
337	0.095268	0.094849	0.094736	0.095286	0.095543	0.094835	0.094989	0.095719	0.097357	0.094868	0.094543	0.097686	0.093937	0.094784	0.096045	0.095457	0.095118	0.095531	0.094555	0.094803	0.096772	0.096958	0.09755	0.094789	0.094828	0.095149	0.099747	0.10011	0.10009	0.10726	0.099834	0.1031	0.09614	0.094726	0.09649	0.095699	0.095593	0.097863	0.10013	0.10142	0.099886	0.10063	0.1029	0.09972	0.10764	0.10296	0.10287	0.1033	0.10329
338	0.097334	0.096956	0.09684	0.097359	0.09763	0.096941	0.097116	0.097798	0.0994	0.097021	0.0967	0.099717	0.096093	0.096953	0.098234	0.097649	0.097293	0.097724	0.096724	0.096973	0.09899	0.099174	0.099774	0.096962	0.097007	0.097322	0.10202	0.10238	0.10237	0.10965	0.1021	0.10543	0.098342	0.096907	0.098694	0.097893	0.097781	0.10009	0.10241	0.10372	0.10216	0.10292	0.10521	0.10199	0.11008	0.10528	0.1052	0.10563	0.10561
339	0.099444	0.099098	0.09898	0.099475	0.099756	0.099083	0.099274	0.099921	0.1015	0.099201	0.098883	0.10181	0.098272	0.099145	0.10044	0.099864	0.099491	0.099939	0.098917	0.099166	0.10123	0.10141	0.10202	0.099159	0.099209	0.099518	0.10431	0.10469	0.10467	0.11209	0.10439	0.10779	0.10056	0.09911	0.10092	0.10011	0.099989	0.10233	0.10471	0.10605	0.10445	0.10523	0.10756	0.10429	0.11256	0.10763	0.10756	0.108	0.10796
340	0.1016	0.10127	0.10115	0.10163	0.10192	0.10126	0.10146	0.10209	0.10364	0.10141	0.10109	0.10395	0.10047	0.10136	0.10268	0.1021	0.10171	0.10218	0.10113	0.10138	0.1035	0.10367	0.10429	0.10138	0.10143	0.10174	0.10663	0.10702	0.10701	0.11456	0.1067	0.11018	0.10281	0.10133	0.10317	0.10235	0.10222	0.10461	0.10704	0.10841	0.10677	0.10756	0.10993	0.10661	0.11509	0.11001	0.10995	0.11039	0.11034
341	0.10377	0.10347	0.10335	0.10381	0.10411	0.10346	0.10367	0.10428	0.10581	0.10363	0.10332	0.10612	0.1027	0.10359	0.10493	0.10436	0.10396	0.10444	0.10337	0.10362	0.10579	0.10596	0.10659	0.10362	0.10368	0.10398	0.10898	0.10938	0.10937	0.11708	0.10905	0.1126	0.10508	0.10358	0.10544	0.10461	0.10447	0.1069	0.1094	0.11081	0.10912	0.10993	0.11234	0.10896	0.11766	0.11243	0.11238	0.11283	0.11276
342	0.10599	0.1057	0.10558	0.10603	0.10632	0.10569	0.10591	0.1065	0.10803	0.10588	0.10557	0.10833	0.10494	0.10585	0.10721	0.10665	0.10623	0.10673	0.10564	0.10588	0.10811	0.10827	0.10891	0.10589	0.10595	0.10624	0.11137	0.11178	0.11176	0.11965	0.11142	0.11507	0.10738	0.10585	0.10774	0.1069	0.10675	0.10923	0.11179	0.11323	0.11151	0.11233	0.11479	0.11134	0.1203	0.11488	0.11484	0.1153	0.11521
343	0.10822	0.10796	0.10783	0.10826	0.10857	0.10795	0.10817	0.10876	0.11027	0.10816	0.10785	0.11058	0.10721	0.10813	0.10951	0.10896	0.10852	0.10904	0.10793	0.10816	0.11045	0.11061	0.11126	0.10818	0.10825	0.10852	0.11379	0.11421	0.1142	0.12227	0.11383	0.11758	0.1097	0.10814	0.11006	0.10921	0.10905	0.11158	0.11421	0.1157	0.11392	0.11476	0.11728	0.11376	0.12299	0.11738	0.11735	0.11782	0.11771
344	0.11049	0.11024	0.11011	0.11053	0.11084	0.11023	0.11046	0.11104	0.11254	0.11046	0.11015	0.11285	0.1095	0.11044	0.11184	0.1113	0.11084	0.11138	0.11024	0.11047	0.11283	0.11298	0.11365	0.11049	0.11057	0.11084	0.11624	0.11669	0.11667	0.12495	0.11627	0.12013	0.11205	0.11046	0.11242	0.11156	0.11138	0.11396	0.11668	0.11821	0.11637	0.11724	0.11981	0.11622	0.12574	0.11992	0.1199	0.12038	0.12025
345	0.11278	0.11255	0.11242	0.11283	0.11314	0.11254	0.11278	0.11335	0.11484	0.11279	0.11248	0.11516	0.11182	0.11278	0.11421	0.11368	0.11319	0.11375	0.11259	0.11281	0.11525	0.11539	0.11607	0.11284	0.11292	0.11318	0.11874	0.1192	0.11918	0.12769	0.11876	0.12274	0.11443	0.11281	0.1148	0.11393	0.11374	0.11638	0.11919	0.12077	0.11887	0.11976	0.12239	0.11872	0.12857	0.12251	0.12251	0.123	0.12285
346	0.11511	0.11489	0.11476	0.11515	0.11547	0.11489	0.11513	0.1157	0.11718	0.11516	0.11485	0.1175	0.11417	0.11514	0.1166	0.11608	0.11557	0.11616	0.11496	0.11518	0.1177	0.11783	0.11852	0.11522	0.11531	0.11555	0.12129	0.12176	0.12174	0.13051	0.12129	0.1254	0.11685	0.11519	0.11722	0.11634	0.11613	0.11884	0.12174	0.12338	0.12141	0.12233	0.12503	0.12126	0.13149	0.12516	0.12517	0.12568	0.1255
347	0.11747	0.11726	0.11713	0.11751	0.11783	0.11726	0.11751	0.11808	0.11955	0.11755	0.11724	0.11988	0.11655	0.11754	0.11903	0.11853	0.11799	0.11861	0.11737	0.11759	0.12019	0.12031	0.12102	0.11763	0.11773	0.11796	0.12388	0.12438	0.12436	0.13341	0.12387	0.12813	0.11931	0.11761	0.11968	0.11879	0.11856	0.12134	0.12435	0.12605	0.124	0.12495	0.12773	0.12385	0.13449	0.12786	0.1279	0.12842	0.12821
348	0.11986	0.11967	0.11953	0.11991	0.12022	0.11968	0.11993	0.12049	0.12195	0.11999	0.11967	0.1223	0.11897	0.11998	0.1215	0.12101	0.12044	0.12109	0.11982	0.12003	0.12273	0.12284	0.12357	0.12008	0.12019	0.1204	0.12653	0.12705	0.12703	0.13639	0.1265	0.13092	0.12181	0.12007	0.12218	0.12127	0.12102	0.12389	0.12701	0.12878	0.12665	0.12763	0.13049	0.1265	0.13759	0.13064	0.13069	0.13123	0.13099
349	0.12229	0.12212	0.12197	0.12233	0.12265	0.12213	0.12238	0.12295	0.12439	0.12246	0.12215	0.12475	0.12142	0.12246	0.12401	0.12354	0.12294	0.12362	0.12231	0.12251	0.12532	0.12541	0.12616	0.12257	0.12269	0.12289	0.12924	0.12979	0.12977	0.13948	0.12919	0.1338	0.12435	0.12256	0.12473	0.12381	0.12353	0.12649	0.12974	0.13158	0.12936	0.13037	0.13333	0.12922	0.14081	0.13349	0.13357	0.13412	0.13384
350	0.12475	0.1246	0.12445	0.1248	0.12512	0.12461	0.12488	0.12544	0.12687	0.12497	0.12466	0.12724	0.12391	0.12497	0.12657	0.12612	0.12548	0.1262	0.12484	0.12503	0.12796	0.12804	0.12881	0.1251	0.12523	0.12541	0.13202	0.13259	0.13257	0.14267	0.13194	0.13675	0.12695	0.1251	0.12733	0.12638	0.12608	0.12914	0.13253	0.13445	0.13213	0.13318	0.13624	0.13199	0.14414	0.13642	0.13652	0.13709	0.13678
351	0.12725	0.12713	0.12697	0.1273	0.12763	0.12714	0.12741	0.12797	0.12939	0.12752	0.12721	0.12977	0.12645	0.12753	0.12917	0.12875	0.12807	0.12882	0.12742	0.1276	0.13065	0.13072	0.13152	0.12768	0.12782	0.12798	0.13486	0.13547	0.13544	0.14598	0.13477	0.13979	0.12959	0.12768	0.12997	0.12901	0.12868	0.13184	0.1354	0.13741	0.13497	0.13606	0.13924	0.13483	0.1476	0.13943	0.13956	0.14016	0.1398
352	0.1298	0.1297	0.12954	0.12985	0.13018	0.12972	0.13	0.13056	0.13196	0.13013	0.12982	0.13235	0.12903	0.13015	0.13183	0.13143	0.13071	0.13151	0.13005	0.13022	0.13342	0.13346	0.13429	0.13032	0.13047	0.13061	0.13779	0.13843	0.13841	0.14944	0.13767	0.14294	0.13229	0.13032	0.13268	0.1317	0.13134	0.13462	0.13834	0.14046	0.13789	0.13903	0.14234	0.13776	0.15124	0.14255	0.14271	0.14333	0.14292
353	0.1324	0.13232	0.13216	0.13245	0.13278	0.13235	0.13263	0.13319	0.13457	0.13279	0.13248	0.13498	0.13167	0.13281	0.13455	0.13417	0.1334	0.13425	0.13274	0.1329	0.13625	0.13627	0.13713	0.13301	0.13317	0.13329	0.14081	0.14148	0.14146	0.15305	0.14065	0.1462	0.13506	0.13302	0.13545	0.13444	0.13405	0.13746	0.14138	0.1436	0.1409	0.14209	0.14554	0.14078	0.15504	0.14578	0.14597	0.14662	0.14616
354	0.13504	0.13499	0.13482	0.13509	0.13543	0.13503	0.13532	0.13588	0.13723	0.1355	0.13519	0.13766	0.13435	0.13554	0.13733	0.13698	0.13616	0.13706	0.13548	0.13563	0.13915	0.13916	0.14004	0.13575	0.13593	0.13602	0.14391	0.14463	0.1446	0.15682	0.14373	0.14958	0.13789	0.13577	0.13829	0.13726	0.13682	0.14037	0.14451	0.14686	0.144	0.14525	0.14886	0.14388	0.15902	0.14912	0.14935	0.15003	0.1495
355	0.13774	0.13772	0.13755	0.13779	0.13813	0.13776	0.13806	0.13862	0.13995	0.13828	0.13797	0.1404	0.1371	0.13832	0.14018	0.13986	0.13898	0.13994	0.13829	0.13842	0.14213	0.14211	0.14304	0.13857	0.13876	0.13882	0.14711	0.14788	0.14785	0.16077	0.1469	0.15309	0.1408	0.13859	0.1412	0.14014	0.13966	0.14337	0.14775	0.15023	0.14719	0.14851	0.1523	0.14709	0.16321	0.15259	0.15286	0.15357	0.15298
356	0.14049	0.14051	0.14033	0.14055	0.14089	0.14056	0.14087	0.14142	0.14273	0.14112	0.14081	0.14319	0.13991	0.14117	0.1431	0.14282	0.14187	0.1429	0.14117	0.14129	0.1452	0.14516	0.14612	0.14145	0.14166	0.14169	0.15043	0.15125	0.15122	0.16495	0.15018	0.15676	0.14378	0.14149	0.14419	0.1431	0.14258	0.14645	0.1511	0.15373	0.15051	0.1519	0.15589	0.15041	0.16765	0.15621	0.15653	0.15728	0.15661
357	0.14331	0.14337	0.14318	0.14336	0.14371	0.14343	0.14375	0.14429	0.14556	0.14404	0.14373	0.14605	0.14279	0.1441	0.1461	0.14586	0.14484	0.14594	0.14413	0.14423	0.14837	0.1483	0.1493	0.14441	0.14464	0.14463	0.15387	0.15476	0.15472	0.16938	0.15359	0.1606	0.14685	0.14446	0.14726	0.14614	0.14557	0.14964	0.15458	0.15738	0.15395	0.15542	0.15963	0.15385	0.17237	0.15999	0.16037	0.16116	0.1604
358	0.14619	0.1463	0.14611	0.14625	0.1466	0.14637	0.1467	0.14724	0.14847	0.14703	0.14673	0.14898	0.14575	0.14711	0.14919	0.149	0.1479	0.14908	0.14717	0.14725	0.15164	0.15154	0.15259	0.14745	0.14771	0.14766	0.15746	0.15841	0.15837	0.1741	0.15713	0.16463	0.15002	0.14751	0.15044	0.14928	0.14866	0.15293	0.15822	0.1612	0.15753	0.1591	0.16356	0.15744	0.17742	0.16396	0.1644	0.16523	0.16438
359	0.14915	0.14931	0.14911	0.14921	0.14957	0.14939	0.14973	0.15026	0.15146	0.15011	0.14981	0.15199	0.14879	0.1502	0.15238	0.15223	0.15105	0.15231	0.1503	0.15036	0.15504	0.1549	0.156	0.15059	0.15087	0.15078	0.1612	0.16222	0.16218	0.17916	0.16083	0.16888	0.1533	0.15066	0.15372	0.15252	0.15184	0.15634	0.16201	0.16521	0.16127	0.16294	0.16769	0.16119	0.18285	0.16814	0.16864	0.16954	0.16858
360	0.15219	0.1524	0.15219	0.15225	0.15262	0.15249	0.15286	0.15337	0.15452	0.15328	0.15299	0.15508	0.15192	0.15339	0.15567	0.15558	0.1543	0.15566	0.15354	0.15357	0.15856	0.15838	0.15955	0.15383	0.15413	0.15399	0.16511	0.16622	0.16618	0.18464	0.16469	0.17338	0.15669	0.15391	0.15712	0.15588	0.15512	0.15989	0.16599	0.16942	0.16519	0.16697	0.17206	0.16511	0.18873	0.17256	0.17314	0.1741	0.17302
361	0.15532	0.15559	0.15537	0.15538	0.15575	0.15569	0.15607	0.15657	0.15767	0.15656	0.15627	0.15826	0.15515	0.15669	0.15908	0.15906	0.15766	0.15914	0.15688	0.15688	0.16222	0.16201	0.16324	0.15718	0.15751	0.15732	0.16922	0.17043	0.17038	0.1906	0.16875	0.17817	0.16021	0.15728	0.16065	0.15936	0.15852	0.16358	0.17017	0.17388	0.1693	0.17122	0.17669	0.16923	0.19514	0.17726	0.17793	0.17896	0.17774
362	0.15854	0.15888	0.15865	0.1586	0.15898	0.15899	0.1594	0.15988	0.16091	0.15995	0.15966	0.16154	0.15849	0.1601	0.16262	0.16266	0.16115	0.16274	0.16034	0.16032	0.16605	0.16578	0.16709	0.16064	0.16102	0.16076	0.17354	0.17487	0.17482	0.19715	0.17303	0.18329	0.16387	0.16077	0.16432	0.16297	0.16205	0.16743	0.17459	0.17861	0.17364	0.17572	0.18163	0.17357	0.20219	0.18229	0.18305	0.18417	0.18278
363	0.16186	0.16228	0.16204	0.16193	0.16231	0.16241	0.16283	0.1633	0.16425	0.16346	0.16318	0.16492	0.16194	0.16364	0.1663	0.16642	0.16477	0.1665	0.16394	0.16388	0.17005	0.16973	0.17112	0.16425	0.16466	0.16433	0.17812	0.17957	0.17952	0.20442	0.17755	0.1888	0.16769	0.1644	0.16815	0.16674	0.16572	0.17147	0.17928	0.18365	0.17824	0.18049	0.18693	0.17816	0.21	0.18768	0.18855	0.18978	0.1882
364	0.16529	0.1658	0.16554	0.16536	0.16575	0.16594	0.16639	0.16683	0.16771	0.16711	0.16684	0.16841	0.16553	0.16732	0.17014	0.17034	0.16854	0.17043	0.16768	0.16759	0.17425	0.17387	0.17535	0.168	0.16845	0.16805	0.18297	0.18458	0.18452	0.21258	0.18235	0.19476	0.17168	0.16817	0.17216	0.17067	0.16955	0.17571	0.18428	0.18905	0.18313	0.18558	0.19265	0.18305	0.21875	0.19351	0.1945	0.19586	0.19407
365	0.16883	0.16945	0.16918	0.16891	0.16931	0.16961	0.17009	0.1705	0.17128	0.1709	0.17064	0.17203	0.16925	0.17115	0.17415	0.17445	0.17247	0.17453	0.17158	0.17145	0.17867	0.17823	0.17981	0.17191	0.17241	0.17192	0.18815	0.18993	0.18987	0.22189	0.18748	0.20127	0.17587	0.17211	0.17636	0.17479	0.17355	0.18017	0.18963	0.19488	0.18835	0.19105	0.19887	0.18826	0.22867	0.19986	0.20099	0.2025	0.20046
366	0.17251	0.17324	0.17295	0.17259	0.173	0.17342	0.17394	0.17431	0.17498	0.17486	0.17461	0.17578	0.17314	0.17516	0.17835	0.17877	0.17659	0.17885	0.17566	0.17548	0.18334	0.18282	0.18453	0.176	0.17655	0.17597	0.1937	0.19569	0.19563	0.23268	0.19299	0.20843	0.18027	0.17624	0.18078	0.17911	0.17774	0.1849	0.19539	0.20119	0.19398	0.19696	0.20569	0.19387	0.24008	0.20683	0.20812	0.20982	0.20749
367	0.17634	0.17719	0.17689	0.17642	0.17684	0.1774	0.17795	0.17828	0.17882	0.179	0.17877	0.17968	0.1772	0.17935	0.18278	0.18331	0.18091	0.1834	0.17994	0.17971	0.18829	0.1877	0.18955	0.18029	0.18091	0.18022	0.19969	0.20191	0.20186	0.24547	0.19894	0.21638	0.18492	0.18058	0.18546	0.18368	0.18216	0.18992	0.20165	0.2081	0.20007	0.20339	0.21324	0.19992	0.25342	0.21457	0.21603	0.21797	0.21529
368	0.18032	0.18132	0.181	0.18041	0.18084	0.18155	0.18215	0.18242	0.18283	0.18334	0.18313	0.18374	0.18146	0.18376	0.18745	0.18812	0.18546	0.18821	0.18444	0.18416	0.19357	0.19288	0.1949	0.18481	0.1855	0.18469	0.20618	0.20869	0.20864	0.26098	0.20542	0.2253	0.18985	0.18515	0.19041	0.1885	0.18681	0.19529	0.20849	0.21571	0.20671	0.21044	0.22169	0.20651	0.26929	0.22324	0.2249	0.22714	0.22406
369	0.18447	0.18564	0.1853	0.18457	0.18502	0.1859	0.18655	0.18676	0.187	0.18791	0.18772	0.18798	0.18593	0.18841	0.19241	0.19323	0.19027	0.19332	0.1892	0.18886	0.19921	0.19843	0.20064	0.18959	0.19036	0.18941	0.21327	0.21613	0.21609	0.28034	0.21252	0.23546	0.1951	0.18999	0.1957	0.19363	0.19175	0.20105	0.21603	0.22417	0.21402	0.21826	0.23128	0.21373	0.28856	0.23309	0.23497	0.2376	0.23403
370	0.18882	0.19018	0.18981	0.18892	0.18939	0.19047	0.19118	0.19131	0.19136	0.19274	0.19258	0.19242	0.19066	0.19333	0.19769	0.19867	0.19538	0.19876	0.19424	0.19383	0.20528	0.20439	0.20683	0.19465	0.19552	0.19441	0.22109	0.22435	0.22434	0.30531	0.22038	0.24719	0.20071	0.19513	0.20135	0.19911	0.197	0.20726	0.22444	0.23369	0.22213	0.22701	0.24233	0.22171	0.31253	0.24445	0.24656	0.24971	0.24556
371	0.19338	0.19496	0.19456	0.19349	0.19398	0.19529	0.19607	0.1961	0.19593	0.19785	0.19773	0.19708	0.19566	0.19857	0.20333	0.2045	0.20082	0.2046	0.1996	0.19912	0.21185	0.21084	0.21354	0.20005	0.20103	0.19974	0.22977	0.23354	0.23355	0.33873	0.22918	0.26098	0.20674	0.20062	0.20745	0.20497	0.20263	0.21402	0.23392	0.24455	0.23126	0.23693	0.25531	0.23062	0.34314	0.25777	0.26012	0.26397	0.25913
372	0.19817	0.20001	0.19958	0.1983	0.19882	0.20038	0.20125	0.20115	0.20074	0.2033	0.20321	0.20197	0.20098	0.20416	0.20941	0.21078	0.20664	0.21089	0.20533	0.20477	0.21899	0.21786	0.22089	0.20582	0.20692	0.20543	0.23952	0.2439	0.24396	0.38511	0.23914	0.2775	0.21327	0.2065	0.21405	0.2113	0.20867	0.22143	0.24475	0.25709	0.24165	0.24836	0.27088	0.24069	0.38323	0.27373	0.2763	0.28113	0.27543
373	0.20323	0.20536	0.20491	0.20337	0.20392	0.20578	0.20675	0.20651	0.2058	0.20911	0.20908	0.20714	0.20666	0.21016	0.21599	0.21758	0.21291	0.21771	0.21148	0.21084	0.22682	0.22555	0.22898	0.21202	0.21328	0.21155	0.25059	0.25572	0.25587	0.45123	0.25058	0.29777	0.22037	0.21284	0.22125	0.21817	0.21521	0.22961	0.25733	0.27183	0.25367	0.26175	0.29	0.25221	0.43686	0.29329	0.29601	0.30222	0.29547
374	0.20859	0.21106	0.21057	0.20875	0.20934	0.21153	0.21263	0.2122	0.21115	0.21536	0.21539	0.21261	0.21276	0.21664	0.22317	0.225	0.21969	0.22515	0.21812	0.21739	0.23546	0.23405	0.23799	0.21874	0.22017	0.21817	0.26333	0.26939	0.26969	0.54535	0.26394	0.32326	0.22817	0.21972	0.22918	0.22567	0.22234	0.23874	0.2722	0.28948	0.26782	0.27774	0.3141	0.26558	0.50886	0.31788	0.3206	0.32881	0.32074
375	0.21428	0.21716	0.21662	0.21446	0.2151	0.21768	0.21893	0.21828	0.21683	0.22212	0.22221	0.21843	0.21935	0.22368	0.23106	0.23314	0.22708	0.23332	0.22534	0.22451	0.24509	0.24354	0.2481	0.22604	0.22768	0.22538	0.2782	0.28543	0.28596	0.67075	0.27981	0.35615	0.23678	0.22724	0.23797	0.23392	0.23016	0.24905	0.29015	0.31105	0.28483	0.29729	0.34522	0.28137	0.60242	0.34965	0.35207	0.36314	0.35342
376	0.22036	0.22371	0.22312	0.22056	0.22126	0.22429	0.22573	0.2248	0.22288	0.22945	0.22964	0.22462	0.22652	0.23139	0.23981	0.24215	0.23519	0.24237	0.23323	0.23229	0.25591	0.25422	0.25959	0.23404	0.23594	0.23328	0.29583	0.30456	0.30544	0.80825	0.2991	0.39958	0.24641	0.23552	0.24784	0.24307	0.23883	0.26085	0.31234	0.33798	0.30574	0.32174	0.38621	0.30034	0.71196	0.39172	0.39334	0.40848	0.39667
377	0.22687	0.23078	0.23012	0.22711	0.22788	0.23143	0.2331	0.23181	0.22935	0.23747	0.23777	0.23126	0.23436	0.2399	0.24961	0.25221	0.24415	0.25249	0.24192	0.24088	0.26819	0.26639	0.27282	0.24288	0.24509	0.24202	0.31711	0.32776	0.3292	0.90967	0.32307	0.45768	0.25726	0.24472	0.25904	0.25333	0.24852	0.27455	0.3404	0.37229	0.33209	0.35305	0.44059	0.3236	0.81503	0.44831	0.44849	0.46901	0.4546
378	0.23387	0.23845	0.23773	0.23415	0.23502	0.23919	0.24115	0.2394	0.23631	0.24631	0.24676	0.2384	0.24302	0.24939	0.26072	0.26355	0.25415	0.26392	0.25156	0.25042	0.2823	0.28044	0.28828	0.25272	0.25531	0.25176	0.34325	0.3564	0.3587	0.94111	0.35359	0.53479	0.26966	0.25504	0.27191	0.26494	0.25949	0.29074	0.37674	0.41673	0.36611	0.39393	0.51172	0.35269	0.88028	0.52411	0.5223	0.54896	0.53155
379	0.24146	0.24684	0.24603	0.24179	0.24277	0.24766	0.24999	0.24767	0.24381	0.25614	0.25675	0.24612	0.25266	0.26007	0.27348	0.27647	0.26542	0.27698	0.26236	0.26114	0.2987	0.29689	0.30662	0.26379	0.26685	0.26273	0.37593	0.39233	0.39593	0.91855	0.3934	0.63217	0.28402	0.26674	0.28695	0.27824	0.27206	0.31023	0.42464	0.47461	0.41094	0.44786	0.60008	0.38975	0.8953	0.6212	0.61772	0.64875	0.62867
380	0.24971	0.25606	0.25514	0.25011	0.25124	0.25698	0.25977	0.25671	0.25195	0.26715	0.26799	0.2545	0.26351	0.27225	0.28836	0.29136	0.27826	0.29208	0.27457	0.27329	0.31801	0.31642	0.32876	0.27637	0.28002	0.27523	0.41738	0.43799	0.44347	0.87142	0.4462	0.74057	0.30089	0.28019	0.30481	0.29368	0.28666	0.33413	0.48811	0.54882	0.47063	0.51847	0.69845	0.43766	0.87346	0.73157	0.72853	0.75708	0.73648
381	0.25875	0.26626	0.26523	0.25922	0.26055	0.26731	0.27069	0.26668	0.26083	0.27961	0.28073	0.26365	0.27587	0.28632	0.306	0.30876	0.29306	0.30977	0.28852	0.28724	0.34107	0.33999	0.35594	0.29082	0.29523	0.28966	0.47027	0.49616	0.50419	0.81403	0.51629	0.83459	0.32102	0.29584	0.32638	0.31184	0.30392	0.36399	0.57046	0.6387	0.5491	0.60712	0.78811	0.49974	0.83219	0.83002	0.8306	0.84664	0.82956
382	0.26871	0.27766	0.27648	0.26929	0.27086	0.27883	0.28298	0.27773	0.27058	0.29389	0.29536	0.27372	0.29012	0.30284	0.32727	0.32935	0.31034	0.33082	0.30465	0.30346	0.36896	0.36889	0.38981	0.30763	0.31303	0.30653	0.53705	0.56898	0.57995	0.75241	0.60608	0.88605	0.34544	0.31435	0.35291	0.33354	0.32465	0.40175	0.66982	0.73448	0.64644	0.70742	0.84618	0.57837	0.78163	0.8862	0.89154	0.89098	0.88031
383	0.27976	0.29049	0.28912	0.28048	0.28238	0.2918	0.29696	0.29007	0.28135	0.31042	0.31235	0.28484	0.3068	0.32254	0.35339	0.35405	0.3308	0.3562	0.32351	0.32258	0.40309	0.40479	0.43242	0.32746	0.33415	0.32654	0.61771	0.65497	0.66818	0.68948	0.70979	0.88945	0.37547	0.3366	0.38601	0.35983	0.34999	0.4496	0.77163	0.815	0.75124	0.79983	0.86291	0.67113	0.72696	0.89233	0.90062	0.88853	0.88368
384	0.29213	0.30506	0.30345	0.29302	0.29535	0.30653	0.31303	0.30396	0.29334	0.32981	0.33232	0.29723	0.32664	0.34644	0.38597	0.38409	0.35536	0.3872	0.34584	0.34544	0.44514	0.4497	0.48583	0.35116	0.35954	0.35066	0.70557	0.74419	0.757	0.62655	0.80635	0.86037	0.41277	0.36378	0.42761	0.39212	0.38144	0.50911	0.84865	0.85915	0.83713	0.85888	0.84629	0.76484	0.67087	0.86409	0.87332	0.85616	0.85491
385	0.30607	0.32177	0.31986	0.3072	0.3101	0.32341	0.3317	0.31971	0.30677	0.35285	0.35611	0.31111	0.35063	0.37593	0.42698	0.42095	0.38524	0.4254	0.37262	0.37316	0.49684	0.50557	0.55103	0.37986	0.39048	0.38013	0.78427	0.81706	0.82568	0.56425	0.86722	0.81449	0.45906	0.39747	0.47961	0.43208	0.42086	0.57953	0.88034	0.86279	0.87915	0.87357	0.80949	0.83613	0.61468	0.81818	0.82754	0.80863	0.80936
386	0.32192	0.34112	0.33882	0.32337	0.32703	0.34293	0.35362	0.33772	0.32195	0.38054	0.38479	0.32677	0.38012	0.41274	0.47847	0.46634	0.42191	0.4725	0.40505	0.40718	0.55909	0.57308	0.62569	0.41498	0.42853	0.41656	0.83429	0.85518	0.85759	0.50291	0.88062	0.76046	0.51564	0.43963	0.54286	0.48148	0.47027	0.65535	0.87005	0.83726	0.87581	0.85331	0.76178	0.86705	0.55903	0.76378	0.77304	0.75382	0.75558
387	0.34011	0.36374	0.36093	0.34198	0.34666	0.36571	0.37964	0.35844	0.33923	0.41414	0.41967	0.34457	0.41681	0.45887	0.54155	0.52164	0.46704	0.52974	0.44457	0.4492	0.6302	0.64917	0.70161	0.45818	0.47539	0.46181	0.84727	0.85567	0.85282	0.44275	0.8579	0.70272	0.58202	0.49234	0.6153	0.54141	0.53107	0.7253	0.83404	0.79524	0.84311	0.81288	0.7084	0.85924	0.50419	0.7055	0.71464	0.69576	0.69797
388	0.36114	0.39038	0.38691	0.36358	0.36963	0.3925	0.41076	0.38244	0.35903	0.45506	0.46225	0.36491	0.46273	0.51599	0.61444	0.58684	0.52195	0.59657	0.49264	0.50092	0.70339	0.72441	0.76511	0.51099	0.53242	0.5175	0.82988	0.82901	0.82294	0.38408	0.81529	0.64357	0.65405	0.55688	0.68967	0.61077	0.60237	0.77597	0.78491	0.7446	0.79534	0.76205	0.65228	0.82624	0.45028	0.64574	0.6548	0.63655	0.63886
389	0.38563	0.42193	0.4176	0.38883	0.39671	0.42413	0.44808	0.41035	0.38188	0.50451	0.51382	0.38827	0.51962	0.58393	0.68977	0.6583	0.58638	0.66843	0.55005	0.56302	0.76623	0.78399	0.80345	0.57378	0.59916	0.58374	0.79364	0.78682	0.77898	0.32748	0.76273	0.58415	0.72235	0.63152	0.75344	0.6838	0.67826	0.79929	0.7293	0.6897	0.74014	0.70605	0.59501	0.7797	0.3974	0.5857	0.59474	0.57723	0.57943
390	0.4143	0.4593	0.4539	0.4185	0.42879	0.46147	0.49256	0.44282	0.40835	0.56265	0.57449	0.41515	0.58753	0.65826	0.75446	0.72694	0.65645	0.73534	0.61554	0.63331	0.80574	0.81552	0.81234	0.64384	0.67116	0.65673	0.74708	0.73646	0.72766	0.27395	0.70536	0.52509	0.7744	0.70851	0.79395	0.74915	0.74666	0.79605	0.67073	0.63296	0.68149	0.64771	0.53748	0.72628	0.34581	0.526	0.53508	0.51835	0.52031
391	0.44788	0.50312	0.49648	0.45338	0.46671	0.50509	0.54436	0.48033	0.43902	0.62703	0.64147	0.44602	0.66221	0.72843	0.79497	0.77972	0.72298	0.78427	0.6838	0.70432	0.81622	0.81666	0.79653	0.71323	0.73823	0.72667	0.69514	0.68205	0.67274	0.22497	0.64587	0.46675	0.8007	0.77351	0.8057	0.79351	0.79322	0.77288	0.61104	0.57569	0.62147	0.58854	0.48022	0.66955	0.29608	0.46703	0.47618	0.46025	0.46191
392	0.48696	0.55321	0.54535	0.49405	0.51096	0.55473	0.6018	0.52296	0.47436	0.69085	0.70709	0.48119	0.73278	0.7801	0.80571	0.80627	0.77322	0.80622	0.74445	0.7632	0.80159	0.79426	0.7641	0.76917	0.78683	0.77948	0.64057	0.62584	0.61625	0.18237	0.58568	0.40943	0.80017	0.81189	0.79239	0.80946	0.80995	0.73682	0.55118	0.51857	0.56116	0.52933	0.42363	0.61145	0.24921	0.40913	0.41832	0.40323	0.40457
393	0.53161	0.60759	0.59896	0.54045	0.56102	0.60839	0.66005	0.5698	0.51443	0.74358	0.75974	0.52049	0.78448	0.80344	0.79072	0.80512	0.79769	0.80125	0.78558	0.79766	0.76975	0.75689	0.72156	0.80027	0.80781	0.80463	0.58493	0.56907	0.55932	0.14765	0.52555	0.3536	0.77844	0.81847	0.76157	0.79907	0.79918	0.69288	0.49172	0.46205	0.50116	0.47059	0.36818	0.55303	0.20664	0.35277	0.36191	0.34774	0.34879
394	0.58073	0.66166	0.65332	0.59113	0.61446	0.66156	0.71118	0.61839	0.55846	0.77522	0.78896	0.56297	0.80681	0.79826	0.75815	0.78218	0.79518	0.77586	0.80014	0.80318	0.72757	0.71084	0.67312	0.8031	0.80126	0.80106	0.5291	0.51244	0.50259	0.12128	0.46598	0.29999	0.74266	0.79868	0.71994	0.76978	0.76892	0.6443	0.43306	0.40645	0.44193	0.41273	0.31457	0.4949	0.16993	0.29875	0.30763	0.29456	0.29537
395	0.63124	0.70821	0.70166	0.6424	0.66605	0.70724	0.74654	0.66425	0.60421	0.78197	0.79175	0.60632	0.8001	0.77183	0.7149	0.74516	0.77174	0.73744	0.78977	0.78455	0.67937	0.65988	0.62136	0.78285	0.77427	0.77571	0.47356	0.45636	0.44647	0.10238	0.40739	0.24983	0.69828	0.76191	0.67186	0.72878	0.72676	0.59302	0.37566	0.35223	0.3839	0.35629	0.26394	0.43746	0.1402	0.24832	0.25662	0.24496	0.24558
396	0.67781	0.73978	0.73636	0.68825	0.70858	0.73825	0.76085	0.70156	0.64773	0.76676	0.77231	0.64685	0.77184	0.73197	0.66541	0.69976	0.7346	0.69127	0.76101	0.74965	0.62785	0.6063	0.56785	0.74718	0.7344	0.73651	0.41871	0.40118	0.39131	0.089436	0.35037	0.20476	0.64884	0.71536	0.62008	0.68094	0.67769	0.54031	0.32023	0.30009	0.32777	0.30209	0.2178	0.38115	0.11758	0.20315	0.21048	0.20057	0.20108
397	0.71376	0.75194	0.75214	0.72174	0.7352	0.7503	0.75447	0.72499	0.68371	0.73591	0.73778	0.67982	0.73033	0.68414	0.61232	0.64949	0.68919	0.64059	0.72062	0.70499	0.57461	0.55145	0.51355	0.70226	0.68694	0.68917	0.36495	0.34737	0.33764	0.080861	0.29581	0.16647	0.59651	0.66327	0.56628	0.62917	0.62466	0.48695	0.26787	0.25119	0.2746	0.2514	0.17789	0.32659	0.10126	0.16495	0.17097	0.16309	0.16354
398	0.73356	0.74485	0.74824	0.73779	0.74246	0.7435	0.73152	0.73176	0.70708	0.69511	0.69401	0.70091	0.68121	0.63174	0.5573	0.59654	0.63897	0.58744	0.67333	0.6547	0.52065	0.49617	0.4591	0.652	0.63516	0.63719	0.31293	0.29567	0.28628	0.075396	0.24505	0.13609	0.54265	0.60818	0.51151	0.5753	0.56953	0.43351	0.22015	0.20705	0.22592	0.20589	0.14549	0.27477	0.08995	0.13477	0.13935	0.13352	0.13393
399	0.73526	0.72222	0.72792	0.73542	0.73157	0.72137	0.69705	0.72253	0.71501	0.64818	0.64472	0.70773	0.62768	0.57674	0.50137	0.54222	0.58598	0.53303	0.622	0.60119	0.46655	0.44104	0.40502	0.59867	0.58098	0.58261	0.26369	0.24725	0.23852	0.072143	0.19988	0.11348	0.48814	0.55158	0.45648	0.52042	0.51339	0.38059	0.17889	0.16932	0.18355	0.16729	0.12086	0.22716	0.082388	0.11242	0.11565	0.11164	0.11201
400	0.72039	0.68845	0.69559	0.71696	0.70619	0.68816	0.65506	0.70005	0.70747	0.59763	0.59228	0.70027	0.57178	0.52047	0.44531	0.48739	0.53159	0.47818	0.56846	0.54603	0.41283	0.3866	0.35191	0.54379	0.52566	0.52677	0.21865	0.20367	0.19597	0.070452	0.16199	0.097558	0.43361	0.49443	0.40182	0.46529	0.45706	0.3289	0.14546	0.13908	0.14899	0.1367	0.1032	0.18545	0.077549	0.096747	0.098899	0.096292	0.096643
401	0.69266	0.64727	0.65525	0.68647	0.67062	0.64754	0.60831	0.66781	0.68682	0.54501	0.53813	0.68054	0.51474	0.46378	0.38977	0.43266	0.47665	0.4235	0.51383	0.49017	0.35999	0.3335	0.30064	0.48828	0.46999	0.47052	0.17945	0.16655	0.16019	0.069877	0.13235	0.086777	0.37967	0.43742	0.34822	0.41049	0.40117	0.27948	0.1202	0.11638	0.1227	0.11401	0.091062	0.15115	0.07468	0.086164	0.087518	0.085929	0.086261
402	0.65589	0.60131	0.60973	0.64768	0.62826	0.60211	0.55861	0.62881	0.65621	0.49134	0.48321	0.65132	0.45738	0.40737	0.33556	0.37859	0.42181	0.36958	0.45887	0.43432	0.30879	0.28273	0.25245	0.43279	0.41458	0.41455	0.14738	0.13692	0.13201	0.070104	0.11062	0.079727	0.3271	0.38119	0.29664	0.35665	0.34649	0.23374	0.10218	0.10022	0.10385	0.098054	0.083009	0.12477	0.073238	0.079266	0.08005	0.079176	0.079493
403	0.61305	0.55236	0.56097	0.60342	0.58152	0.55364	0.50719	0.58526	0.61851	0.43738	0.42826	0.61519	0.40046	0.35205	0.28378	0.32593	0.36773	0.31721	0.40421	0.37915	0.26032	0.23566	0.20891	0.37798	0.3601	0.35955	0.12281	0.11476	0.11121	0.070902	0.095507	0.075332	0.27695	0.32656	0.24839	0.30464	0.29401	0.19325	0.08989	0.089178	0.090957	0.087276	0.077889	0.1057	0.072823	0.074985	0.075364	0.074992	0.075298
404	0.56628	0.50163	0.51027	0.55564	0.53205	0.50336	0.45494	0.53876	0.57594	0.3838	0.37395	0.57424	0.3448	0.29884	0.23592	0.2757	0.31525	0.26751	0.35054	0.32548	0.21606	0.19392	0.17162	0.32464	0.30744	0.30647	0.10506	0.09908	0.096623	0.072108	0.085394	0.072821	0.23066	0.27467	0.20509	0.25569	0.24513	0.15943	0.081791	0.081897	0.082435	0.080243	0.074855	0.092561	0.073146	0.072557	0.072648	0.072631	0.072927
405	0.51703	0.45	0.45856	0.50569	0.48098	0.45213	0.40259	0.49041	0.53013	0.33142	0.32111	0.53001	0.29149	0.24918	0.1937	0.22935	0.26554	0.22199	0.29877	0.27446	0.17764	0.15902	0.14166	0.2739	0.25783	0.25659	0.092797	0.08842	0.086776	0.073604	0.078849	0.071657	0.1899	0.2271	0.16833	0.21137	0.20155	0.13292	0.07666	0.077307	0.07701	0.075864	0.073314	0.083817	0.074002	0.071453	0.071339	0.071573	0.071863
406	0.46633	0.39822	0.4066	0.45453	0.42917	0.4007	0.35091	0.44105	0.48225	0.28131	0.27093	0.48363	0.24207	0.20478	0.15862	0.18857	0.22017	0.18233	0.25022	0.22761	0.1463	0.1317	0.11908	0.22727	0.21289	0.21157	0.084613	0.081425	0.080366	0.075308	0.074831	0.071461	0.15607	0.1856	0.13906	0.17334	0.16486	0.11332	0.07364	0.074645	0.073784	0.073376	0.072845	0.07822	0.075245	0.071302	0.07104	0.071453	0.071737
407	0.41504	0.34709	0.35516	0.40301	0.37747	0.34982	0.30086	0.3914	0.43322	0.23491	0.22492	0.43601	0.19829	0.16732	0.13137	0.15477	0.18079	0.14984	0.20653	0.18664	0.12236	0.11161	0.10298	0.18645	0.1743	0.17309	0.079372	0.07705	0.076409	0.07716	0.072602	0.071955	0.12979	0.15161	0.11721	0.14273	0.13595	0.099528	0.072119	0.073363	0.072117	0.072234	0.073142	0.074855	0.076764	0.071828	0.071463	0.072001	0.07228
408	0.36399	0.2976	0.30521	0.35196	0.32679	0.30049	0.25375	0.34227	0.38388	0.19388	0.18477	0.38794	0.16178	0.13776	0.11151	0.12858	0.1487	0.12496	0.16931	0.15298	0.10513	0.097583	0.091989	0.15286	0.14325	0.14228	0.076233	0.074541	0.074201	0.079115	0.071645	0.072942	0.11059	0.12562	0.10177	0.11967	0.11463	0.090194	0.071665	0.073068	0.07156	0.07205	0.073984	0.07308	0.078481	0.072838	0.072399	0.073027	0.0733
409	0.31415	0.25107	0.25799	0.30243	0.2783	0.25395	0.21115	0.29462	0.33512	0.15967	0.15185	0.34025	0.13335	0.11594	0.097749	0.10953	0.12426	0.10702	0.13965	0.12713	0.093285	0.088167	0.084749	0.12705	0.11991	0.11922	0.074603	0.073371	0.073246	0.081145	0.071597	0.07428	0.097253	0.10697	0.0913	0.10328	0.099737	0.084113	0.071974	0.073482	0.071796	0.072551	0.075217	0.072441	0.080341	0.074193	0.073702	0.074392	0.074661
410	0.26675	0.20906	0.21507	0.25571	0.23346	0.21178	0.17463	0.24972	0.28803	0.13299	0.12664	0.29395	0.11264	0.1007	0.088571	0.096334	0.10672	0.094689	0.11752	0.1085	0.08543	0.082071	0.080193	0.10841	0.10335	0.10294	0.074058	0.073162	0.073191	0.083229	0.072197	0.075868	0.088331	0.094202	0.084456	0.092124	0.089733	0.080368	0.072829	0.074404	0.072599	0.073542	0.076727	0.072616	0.082304	0.075793	0.075266	0.076001	0.076265
411	0.22331	0.17314	0.17804	0.21339	0.1939	0.17554	0.14523	0.2091	0.24398	0.11345	0.10848	0.25032	0.09831	0.090465	0.082671	0.087531	0.0947	0.086509	0.10193	0.095694	0.080437	0.078339	0.077557	0.095595	0.092104	0.091917	0.074294	0.073641	0.073781	0.085354	0.073261	0.077636	0.082586	0.085769	0.080193	0.084796	0.083248	0.078302	0.074073	0.075691	0.073807	0.074883	0.078437	0.073374	0.084343	0.077568	0.077017	0.077783	0.078042
412	0.18546	0.14432	0.14804	0.17706	0.16101	0.14629	0.12306	0.17424	0.20451	0.099835	0.096002	0.21081	0.088769	0.083834	0.079096	0.08188	0.086755	0.081299	0.091382	0.087209	0.077487	0.076298	0.076298	0.087092	0.084733	0.084715	0.075089	0.074613	0.074832	0.087509	0.074654	0.07953	0.079108	0.080408	0.077774	0.080194	0.079258	0.077446	0.075593	0.077239	0.075302	0.076471	0.080288	0.074547	0.086439	0.079468	0.0789	0.079688	0.079941
413	0.15442	0.12262	0.12524	0.14774	0.13536	0.12413	0.10722	0.14612	0.17103	0.090715	0.087742	0.17685	0.082647	0.07976	0.077185	0.078479	0.081726	0.078213	0.084509	0.081811	0.07601	0.075472	0.07603	0.081678	0.080121	0.08023	0.076285	0.075938	0.076214	0.08969	0.076282	0.081515	0.077256	0.077229	0.07668	0.077542	0.07705	0.07746	0.077312	0.078973	0.077001	0.078237	0.08224	0.076017	0.08858	0.081456	0.080878	0.081681	0.081928
414	0.13056	0.10717	0.10891	0.12557	0.11655	0.10829	0.096412	0.12481	0.14434	0.084845	0.0825	0.14936	0.078935	0.077495	0.076457	0.076682	0.07877	0.076642	0.080248	0.078601	0.075585	0.075515	0.076468	0.078454	0.077466	0.077669	0.077767	0.077514	0.07783	0.091893	0.078075	0.083565	0.076566	0.0756	0.076531	0.076281	0.076112	0.078096	0.079169	0.08084	0.078846	0.080129	0.084265	0.077697	0.090757	0.083508	0.082924	0.083737	0.083979
415	0.1133	0.096656	0.097739	0.10974	0.10345	0.097457	0.089318	0.10955	0.12434	0.081289	0.079398	0.12845	0.076932	0.076519	0.076573	0.076031	0.077293	0.076152	0.077842	0.076947	0.075911	0.076175	0.077409	0.07679	0.076207	0.07648	0.079453	0.07927	0.079614	0.094118	0.079985	0.085664	0.076704	0.075076	0.077055	0.076014	0.076077	0.079175	0.081126	0.082804	0.080793	0.08211	0.086344	0.079527	0.092964	0.085606	0.085019	0.085841	0.086077
416	0.1014	0.08978	0.090396	0.098951	0.094702	0.090345	0.084886	0.099117	0.11015	0.079381	0.07782	0.11339	0.076144	0.076461	0.077287	0.076199	0.076872	0.076435	0.07676	0.076402	0.076774	0.077275	0.078709	0.076237	0.075944	0.076267	0.081286	0.081153	0.081517	0.096363	0.081979	0.087799	0.077433	0.075337	0.078058	0.076455	0.076684	0.08057	0.083155	0.084838	0.082813	0.084155	0.088464	0.081464	0.095201	0.087741	0.087152	0.087981	0.088211
417	0.093535	0.085508	0.085796	0.091882	0.089102	0.085902	0.082354	0.092267	0.10053	0.078653	0.077329	0.10305	0.07622	0.077053	0.078426	0.076949	0.077203	0.077266	0.076623	0.076648	0.078019	0.078689	0.080263	0.076478	0.07639	0.07675	0.083223	0.083128	0.083507	0.098631	0.084033	0.089964	0.078582	0.076157	0.079401	0.0774	0.077748	0.082191	0.085235	0.086924	0.084887	0.086248	0.090616	0.083477	0.097465	0.089904	0.089315	0.09015	0.090373
418	0.088563	0.083094	0.083149	0.087481	0.085746	0.083363	0.081179	0.088	0.094267	0.078764	0.077612	0.096249	0.076909	0.078107	0.079867	0.078114	0.078069	0.078489	0.077157	0.077456	0.079536	0.080326	0.082	0.077281	0.077339	0.077725	0.085236	0.085169	0.08556	0.10092	0.08613	0.092154	0.080029	0.077374	0.080987	0.078703	0.079136	0.083974	0.087354	0.08905	0.087	0.088377	0.092796	0.085546	0.099756	0.092091	0.091503	0.092344	0.09256
419	0.085671	0.082015	0.081907	0.084995	0.084002	0.082195	0.08098	0.085598	0.090447	0.079478	0.078449	0.092026	0.078035	0.079491	0.081523	0.079576	0.079319	0.079992	0.078173	0.078664	0.081248	0.082123	0.083869	0.078486	0.078649	0.079052	0.087306	0.087261	0.087659	0.10324	0.088261	0.094367	0.081691	0.078873	0.082746	0.080263	0.080756	0.085874	0.089504	0.091209	0.089145	0.090536	0.095	0.087657	0.10208	0.094301	0.093714	0.094562	0.09477
420	0.084247	0.08188	0.081656	0.08386	0.083394	0.081995	0.081468	0.084515	0.088357	0.080614	0.079675	0.089642	0.079468	0.081105	0.083332	0.081247	0.080837	0.081692	0.079526	0.080154	0.083098	0.084033	0.08583	0.079975	0.080211	0.080626	0.089419	0.089391	0.089796	0.10558	0.090418	0.096601	0.083504	0.080571	0.084629	0.082003	0.082538	0.087858	0.091679	0.093395	0.091315	0.092719	0.097228	0.089801	0.10443	0.096531	0.095946	0.096801	0.097001
421	0.083861	0.082409	0.082104	0.08368	0.083589	0.082479	0.082441	0.084368	0.087495	0.082049	0.081175	0.088566	0.081116	0.082883	0.085248	0.083066	0.082545	0.083531	0.081118	0.081842	0.085047	0.086024	0.087859	0.081663	0.081952	0.082374	0.091566	0.091552	0.091962	0.10796	0.092598	0.098859	0.085424	0.082409	0.0866	0.083872	0.084436	0.089905	0.093876	0.095607	0.093506	0.094924	0.099478	0.091971	0.10681	0.098784	0.098201	0.099063	0.099254
422	0.084216	0.083413	0.08305	0.08418	0.084355	0.083449	0.083758	0.08489	0.087509	0.083697	0.08287	0.088424	0.082918	0.084776	0.087241	0.084991	0.08439	0.085471	0.082879	0.083672	0.087068	0.088075	0.08994	0.083493	0.083821	0.084247	0.093741	0.093739	0.094153	0.11037	0.094799	0.10114	0.087423	0.084347	0.088635	0.085832	0.086416	0.091999	0.096095	0.097843	0.095719	0.097151	0.10175	0.094166	0.10924	0.10106	0.10048	0.10135	0.10153
423	0.085098	0.084755	0.084351	0.085165	0.085528	0.084768	0.085323	0.085889	0.088148	0.085497	0.084705	0.088952	0.08483	0.086754	0.089292	0.086993	0.086333	0.087484	0.084763	0.085604	0.089143	0.09017	0.09206	0.085426	0.085782	0.086209	0.095942	0.09595	0.096369	0.11282	0.097019	0.10345	0.08948	0.086358	0.090719	0.087861	0.088458	0.094131	0.098335	0.1001	0.097952	0.0994	0.10405	0.096382	0.1117	0.10336	0.10278	0.10366	0.10383
424	0.086359	0.086341	0.085909	0.0865	0.086995	0.086338	0.087068	0.087234	0.089237	0.08741	0.086642	0.089962	0.086821	0.088794	0.091388	0.089054	0.088348	0.089553	0.086736	0.087611	0.09126	0.092302	0.094212	0.087433	0.087811	0.088237	0.098168	0.098185	0.098608	0.11531	0.09926	0.10578	0.091582	0.088423	0.092842	0.08994	0.090546	0.096295	0.1006	0.10239	0.10021	0.10167	0.10638	0.098621	0.1142	0.10569	0.10511	0.106	0.10616
425	0.087886	0.088099	0.087646	0.088078	0.088667	0.088084	0.088938	0.088819	0.090642	0.089402	0.088652	0.09131	0.08887	0.090879	0.093517	0.091158	0.090416	0.091662	0.088773	0.089671	0.09341	0.094463	0.096392	0.089495	0.089889	0.090313	0.10042	0.10044	0.10087	0.11785	0.10152	0.10814	0.093719	0.090527	0.094995	0.092058	0.092669	0.098487	0.10288	0.1047	0.10248	0.10397	0.10874	0.10088	0.11676	0.10804	0.10747	0.10837	0.10852
426	0.089607	0.089984	0.089516	0.089835	0.090489	0.089961	0.090903	0.090583	0.092278	0.091454	0.090717	0.092907	0.090963	0.093001	0.095674	0.093296	0.092525	0.093806	0.090859	0.091774	0.095588	0.09665	0.098598	0.0916	0.092006	0.092428	0.10269	0.10273	0.10316	0.12043	0.10381	0.11054	0.095886	0.092664	0.097176	0.094208	0.094822	0.1007	0.10519	0.10704	0.10479	0.10629	0.11113	0.10317	0.11936	0.11043	0.10986	0.11078	0.11091
427	0.091455	0.091952	0.091473	0.091709	0.092411	0.091924	0.092931	0.092463	0.094064	0.093549	0.092821	0.094666	0.093087	0.09515	0.097855	0.095462	0.094666	0.095976	0.09298	0.093907	0.097791	0.09886	0.10083	0.093735	0.094152	0.09457	0.10499	0.10504	0.10547	0.12308	0.10612	0.11297	0.098078	0.094826	0.099381	0.096384	0.096998	0.10295	0.10753	0.10942	0.10712	0.10864	0.11356	0.10548	0.12203	0.11286	0.11229	0.11322	0.11334
428	0.093398	0.093986	0.093498	0.093672	0.094409	0.093954	0.09501	0.094433	0.095965	0.095679	0.094956	0.096548	0.095237	0.097323	0.10006	0.097653	0.096833	0.098171	0.09513	0.096067	0.10002	0.10109	0.10308	0.095897	0.096324	0.096737	0.10732	0.10737	0.10782	0.12578	0.10846	0.11545	0.10029	0.09701	0.10161	0.098583	0.099198	0.10522	0.1099	0.11183	0.10947	0.11103	0.11602	0.10782	0.12476	0.11532	0.11476	0.1157	0.1158
429	0.095417	0.096072	0.095577	0.095704	0.096468	0.096038	0.09713	0.096475	0.097956	0.097839	0.097121	0.098527	0.097413	0.099519	0.10229	0.099868	0.099025	0.10039	0.097307	0.098251	0.10227	0.10335	0.10536	0.098084	0.09852	0.098927	0.10968	0.10974	0.11019	0.12855	0.11083	0.11796	0.10253	0.099217	0.10386	0.10081	0.10142	0.10751	0.1123	0.11427	0.11187	0.11345	0.11853	0.11019	0.12756	0.11782	0.11727	0.11823	0.11831
430	0.097492	0.098199	0.097697	0.09779	0.098573	0.098164	0.099284	0.098569	0.10001	0.10003	0.099309	0.10058	0.09961	0.10174	0.10454	0.10211	0.10124	0.10263	0.099509	0.10046	0.10455	0.10563	0.10766	0.10029	0.10074	0.10114	0.11207	0.11215	0.1126	0.1314	0.11323	0.12053	0.1048	0.10145	0.10614	0.10305	0.10366	0.10983	0.11474	0.11676	0.11429	0.11591	0.12109	0.11259	0.13044	0.12038	0.11982	0.12081	0.12087
431	0.099613	0.10036	0.099854	0.099919	0.10072	0.10033	0.10147	0.10071	0.10213	0.10224	0.10152	0.10269	0.10183	0.10398	0.10681	0.10437	0.10348	0.1049	0.10173	0.10269	0.10685	0.10794	0.11	0.10253	0.10298	0.10337	0.1145	0.11459	0.11505	0.13433	0.11567	0.12315	0.10709	0.1037	0.10844	0.10532	0.10593	0.11219	0.11722	0.11929	0.11676	0.11841	0.1237	0.11503	0.1334	0.12298	0.12243	0.12344	0.12348
432	0.10177	0.10255	0.10204	0.10209	0.1029	0.10252	0.10368	0.10289	0.10428	0.10448	0.10376	0.10485	0.10407	0.10624	0.10911	0.10666	0.10575	0.10719	0.10398	0.10494	0.10918	0.11028	0.11236	0.10478	0.10525	0.10563	0.11697	0.11707	0.11753	0.13736	0.11814	0.12583	0.10941	0.10597	0.11077	0.10762	0.10823	0.11458	0.11975	0.12188	0.11927	0.12095	0.12637	0.11751	0.13646	0.12564	0.1251	0.12613	0.12615
433	0.10396	0.10477	0.10426	0.10428	0.1051	0.10474	0.10592	0.1051	0.10647	0.10674	0.10602	0.10704	0.10633	0.10853	0.11144	0.10897	0.10803	0.10951	0.10626	0.10722	0.11154	0.11264	0.11476	0.10706	0.10754	0.10792	0.11948	0.11959	0.12007	0.14048	0.12067	0.12857	0.11175	0.10827	0.11314	0.10995	0.11055	0.117	0.12232	0.12451	0.12182	0.12355	0.1291	0.12004	0.13962	0.12837	0.12783	0.12889	0.12888
434	0.10618	0.10702	0.1065	0.1065	0.10733	0.10699	0.10818	0.10734	0.1087	0.10902	0.1083	0.10927	0.10862	0.11085	0.11379	0.11132	0.11035	0.11186	0.10855	0.10952	0.11394	0.11504	0.11719	0.10937	0.10985	0.11022	0.12204	0.12217	0.12265	0.14372	0.12324	0.13138	0.11413	0.1106	0.11553	0.1123	0.1129	0.11946	0.12495	0.12721	0.12443	0.1262	0.1319	0.12261	0.1429	0.13116	0.13063	0.13171	0.13168
435	0.10843	0.10929	0.10876	0.10875	0.10959	0.10926	0.11047	0.1096	0.11095	0.11134	0.11062	0.11153	0.11094	0.11319	0.11618	0.11369	0.11269	0.11424	0.11088	0.11185	0.11637	0.11748	0.11967	0.1117	0.1122	0.11256	0.12465	0.12479	0.12529	0.14708	0.12586	0.13426	0.11655	0.11295	0.11796	0.11469	0.11528	0.12197	0.12763	0.12997	0.12709	0.12891	0.13477	0.12524	0.14631	0.13403	0.13351	0.13462	0.13455
436	0.1107	0.11159	0.11105	0.11103	0.11187	0.11156	0.11279	0.1119	0.11323	0.11368	0.11295	0.11382	0.11328	0.11557	0.11861	0.1161	0.11507	0.11666	0.11323	0.11421	0.11884	0.11996	0.12219	0.11407	0.11457	0.11493	0.12731	0.12748	0.12798	0.15059	0.12854	0.13724	0.119	0.11534	0.12043	0.11711	0.11769	0.12452	0.13038	0.13281	0.12981	0.13169	0.13773	0.12792	0.14987	0.13698	0.13647	0.13761	0.13751
437	0.113	0.11392	0.11338	0.11333	0.11419	0.11389	0.11514	0.11422	0.11555	0.11605	0.11532	0.11614	0.11565	0.11797	0.12107	0.11855	0.11748	0.11911	0.11562	0.1166	0.12135	0.12248	0.12475	0.11646	0.11699	0.11732	0.13004	0.13022	0.13074	0.15426	0.13128	0.1403	0.12149	0.11776	0.12295	0.11957	0.12015	0.12712	0.1332	0.13572	0.13261	0.13455	0.14077	0.13067	0.15358	0.14002	0.13952	0.1407	0.14056
438	0.11532	0.11628	0.11573	0.11566	0.11653	0.11625	0.11752	0.11658	0.11789	0.11846	0.11773	0.11849	0.11806	0.12042	0.12357	0.12103	0.11993	0.12161	0.11804	0.11903	0.12391	0.12504	0.12736	0.1189	0.11943	0.11976	0.13283	0.13304	0.13357	0.15811	0.1341	0.14347	0.12402	0.12022	0.12551	0.12207	0.12264	0.12977	0.13609	0.13872	0.13547	0.13748	0.14392	0.13348	0.15749	0.14316	0.14267	0.1439	0.14371
439	0.11768	0.11867	0.11811	0.11803	0.1189	0.11865	0.11993	0.11897	0.12027	0.12091	0.12017	0.12088	0.1205	0.1229	0.12612	0.12356	0.12241	0.12415	0.1205	0.12149	0.12652	0.12766	0.13004	0.12137	0.12192	0.12223	0.1357	0.13594	0.13648	0.16217	0.13698	0.14676	0.12661	0.12272	0.12811	0.12462	0.12518	0.13248	0.13907	0.14181	0.13842	0.1405	0.14718	0.13638	0.1616	0.14641	0.14594	0.14721	0.14697
440	0.12008	0.1211	0.12053	0.12043	0.12131	0.12108	0.12238	0.1214	0.12268	0.12339	0.12265	0.12331	0.12298	0.12543	0.12872	0.12614	0.12494	0.12673	0.123	0.124	0.12919	0.13033	0.13277	0.12388	0.12445	0.12475	0.13865	0.13891	0.13947	0.16646	0.13995	0.15017	0.12925	0.12527	0.13078	0.12721	0.12776	0.13526	0.14214	0.14501	0.14145	0.14361	0.15057	0.13935	0.16594	0.14979	0.14933	0.15066	0.15036
441	0.12251	0.12356	0.12298	0.12286	0.12376	0.12355	0.12487	0.12386	0.12513	0.12592	0.12517	0.12578	0.1255	0.128	0.13137	0.12877	0.12752	0.12937	0.12555	0.12655	0.13191	0.13307	0.13556	0.12644	0.12703	0.12731	0.14168	0.14198	0.14255	0.17103	0.14301	0.15372	0.13194	0.12786	0.1335	0.12986	0.1304	0.1381	0.14531	0.14832	0.14458	0.14684	0.15409	0.14242	0.17055	0.1533	0.15286	0.15425	0.15388
442	0.12498	0.12607	0.12548	0.12534	0.12624	0.12606	0.12741	0.12637	0.12762	0.12849	0.12774	0.12828	0.12807	0.13063	0.13407	0.13146	0.13015	0.13207	0.12814	0.12915	0.1347	0.13587	0.13843	0.12905	0.12966	0.12992	0.14481	0.14515	0.14574	0.17592	0.14618	0.15743	0.13469	0.13051	0.13629	0.13256	0.13309	0.14103	0.14859	0.15176	0.14782	0.15018	0.15777	0.14559	0.17548	0.15697	0.15655	0.158	0.15756
443	0.12748	0.12862	0.12802	0.12785	0.12877	0.12862	0.12999	0.12892	0.13015	0.13112	0.13035	0.13084	0.13069	0.13331	0.13684	0.1342	0.13284	0.13483	0.13079	0.13181	0.13756	0.13874	0.14138	0.13171	0.13235	0.13258	0.14805	0.14843	0.14904	0.18119	0.14945	0.16133	0.13752	0.13321	0.13915	0.13533	0.13585	0.14403	0.152	0.15535	0.15118	0.15365	0.16162	0.14887	0.18077	0.16081	0.16041	0.16194	0.16142
444	0.13004	0.13122	0.13061	0.13041	0.13134	0.13122	0.13262	0.13152	0.13273	0.13379	0.13303	0.13343	0.13337	0.13605	0.13968	0.13702	0.13558	0.13765	0.1335	0.13452	0.1405	0.14169	0.14441	0.13443	0.13509	0.13531	0.15141	0.15183	0.15246	0.18691	0.15284	0.16542	0.14041	0.13598	0.14208	0.13817	0.13867	0.14713	0.15555	0.15909	0.15468	0.15728	0.16567	0.15227	0.18649	0.16485	0.16447	0.16608	0.16547
445	0.13264	0.13387	0.13325	0.13302	0.13396	0.13388	0.13531	0.13417	0.13536	0.13653	0.13576	0.13608	0.1361	0.13885	0.14259	0.1399	0.13839	0.14055	0.13626	0.13729	0.14353	0.14472	0.14753	0.13722	0.13791	0.13809	0.15489	0.15537	0.15603	0.19317	0.15637	0.16974	0.14339	0.13882	0.1451	0.14108	0.14156	0.15032	0.15926	0.16302	0.15832	0.16106	0.16994	0.15581	0.19271	0.16912	0.16876	0.17047	0.16975
446	0.13529	0.13658	0.13594	0.13568	0.13664	0.13659	0.13806	0.13688	0.13804	0.13933	0.13855	0.13879	0.1389	0.14172	0.14558	0.14287	0.14127	0.14353	0.1391	0.14013	0.14664	0.14785	0.15076	0.14007	0.14079	0.14095	0.15852	0.15906	0.15975	0.2001	0.16005	0.17433	0.14645	0.14173	0.14821	0.14407	0.14454	0.15363	0.16314	0.16715	0.16213	0.16503	0.17447	0.1595	0.19954	0.17363	0.1733	0.17513	0.17429
447	0.13799	0.13935	0.13869	0.13839	0.13937	0.13937	0.14086	0.13964	0.14078	0.1422	0.14141	0.14155	0.14177	0.14467	0.14866	0.14592	0.14423	0.1466	0.142	0.14304	0.14986	0.15108	0.1541	0.143	0.14375	0.14388	0.16232	0.16292	0.16364	0.20787	0.16391	0.17923	0.14961	0.14472	0.15142	0.14716	0.1476	0.15705	0.16721	0.17151	0.16613	0.16922	0.1793	0.16336	0.2071	0.17845	0.17815	0.1801	0.17913
448	0.14076	0.14218	0.14151	0.14116	0.14216	0.14221	0.14374	0.14247	0.14357	0.14515	0.14435	0.14437	0.14471	0.14771	0.15184	0.14906	0.14727	0.14976	0.14499	0.14604	0.15319	0.15443	0.15757	0.14601	0.1468	0.14689	0.16629	0.16697	0.16773	0.21671	0.16795	0.18448	0.15288	0.14779	0.15473	0.15034	0.15075	0.16061	0.17151	0.17613	0.17034	0.17364	0.18448	0.16741	0.21557	0.18361	0.18334	0.18545	0.18432
449	0.14359	0.14508	0.14439	0.144	0.14501	0.14512	0.14669	0.14537	0.14644	0.14818	0.14737	0.14726	0.14773	0.15083	0.15512	0.15231	0.15041	0.15303	0.14806	0.14912	0.15665	0.1579	0.16117	0.14911	0.14994	0.14999	0.17047	0.17123	0.17204	0.22693	0.17222	0.19015	0.15625	0.15097	0.15817	0.15362	0.15401	0.16432	0.17607	0.18105	0.1748	0.17834	0.19008	0.17169	0.22518	0.18917	0.18893	0.19122	0.18992
450	0.14649	0.14806	0.14735	0.14691	0.14794	0.1481	0.14973	0.14835	0.14937	0.15129	0.15048	0.15023	0.15084	0.15405	0.15851	0.15567	0.15364	0.15641	0.15123	0.1523	0.16024	0.16151	0.16493	0.1523	0.15318	0.15318	0.17487	0.17574	0.17659	0.23902	0.17673	0.19632	0.15976	0.15425	0.16175	0.15702	0.15738	0.16819	0.18093	0.18633	0.17954	0.18337	0.19617	0.17621	0.23625	0.19521	0.195	0.19752	0.196
451	0.14946	0.15112	0.15039	0.14989	0.15095	0.15118	0.15285	0.15141	0.15237	0.15451	0.15369	0.15327	0.15406	0.15738	0.16204	0.15916	0.15699	0.15992	0.1545	0.15558	0.16398	0.16527	0.16886	0.15561	0.15653	0.15649	0.17954	0.18053	0.18144	0.25366	0.18153	0.20309	0.16341	0.15764	0.16547	0.16056	0.16088	0.17225	0.18613	0.19202	0.1846	0.18877	0.20286	0.18101	0.24921	0.20184	0.20165	0.20444	0.20268
452	0.15251	0.15427	0.15352	0.15295	0.15403	0.15434	0.15606	0.15455	0.15546	0.15782	0.157	0.1564	0.15737	0.16083	0.1657	0.16278	0.16045	0.16357	0.15788	0.15897	0.16789	0.1692	0.17297	0.15902	0.16001	0.15991	0.18451	0.18563	0.18661	0.27196	0.18666	0.21058	0.16721	0.16117	0.16936	0.16423	0.16452	0.17651	0.19173	0.19821	0.19005	0.19461	0.2103	0.18614	0.26471	0.20917	0.20899	0.21212	0.21007
453	0.15565	0.15752	0.15674	0.1561	0.15721	0.1576	0.15939	0.1578	0.15864	0.16126	0.16042	0.15962	0.16081	0.16442	0.16952	0.16655	0.16405	0.16738	0.16139	0.16249	0.17199	0.17332	0.17731	0.16257	0.16362	0.16345	0.18982	0.1911	0.19217	0.2956	0.19218	0.21899	0.17119	0.16483	0.17343	0.16806	0.16831	0.18102	0.19782	0.20499	0.19595	0.201	0.21869	0.19165	0.28371	0.21738	0.21718	0.22075	0.21836
454	0.15888	0.16087	0.16007	0.15935	0.16049	0.16096	0.16282	0.16114	0.16191	0.16482	0.16398	0.16294	0.16437	0.16814	0.17352	0.1705	0.1678	0.17136	0.16504	0.16615	0.17629	0.17765	0.18188	0.16626	0.16738	0.16714	0.19554	0.19701	0.19818	0.3273	0.19815	0.22856	0.17536	0.16865	0.17771	0.17207	0.17227	0.18579	0.20449	0.21249	0.20239	0.20804	0.22828	0.19762	0.30763	0.2267	0.22645	0.23058	0.22779
455	0.16222	0.16435	0.16351	0.1627	0.16387	0.16445	0.16638	0.1646	0.16529	0.16852	0.16768	0.16636	0.16808	0.17203	0.17771	0.17463	0.17171	0.17553	0.16883	0.16996	0.18083	0.18223	0.18674	0.17011	0.17131	0.17099	0.20173	0.20341	0.20472	0.37138	0.20467	0.23961	0.17975	0.17265	0.18223	0.17628	0.17642	0.19086	0.21187	0.22088	0.2095	0.2159	0.23947	0.20412	0.33862	0.23745	0.23709	0.24196	0.23868
456	0.16566	0.16794	0.16707	0.16617	0.16737	0.16806	0.17007	0.16819	0.16878	0.17238	0.17153	0.16991	0.17194	0.1761	0.18212	0.17897	0.1758	0.17991	0.1728	0.17395	0.18564	0.18708	0.19191	0.17413	0.17542	0.17501	0.20849	0.21042	0.21189	0.43436	0.21185	0.25262	0.18439	0.17684	0.18701	0.18071	0.18079	0.1963	0.22014	0.2304	0.21743	0.22478	0.25279	0.21126	0.37987	0.25012	0.24951	0.25539	0.25152
457	0.16923	0.17168	0.17077	0.16975	0.17099	0.17182	0.17392	0.17191	0.17239	0.17641	0.17555	0.17358	0.17599	0.18038	0.18678	0.18356	0.1801	0.18454	0.17695	0.17812	0.19075	0.19225	0.19745	0.17835	0.17973	0.17923	0.21592	0.21815	0.21984	0.52452	0.21984	0.2683	0.18931	0.18125	0.1921	0.18539	0.18541	0.20216	0.22953	0.24135	0.2264	0.23497	0.269	0.21919	0.43569	0.26535	0.2643	0.27158	0.26698
458	0.17293	0.17557	0.17462	0.17348	0.17476	0.17573	0.17793	0.17578	0.17614	0.18063	0.17977	0.17739	0.18022	0.18487	0.19172	0.18841	0.18462	0.18945	0.18132	0.18251	0.19621	0.19778	0.20341	0.18278	0.18428	0.18366	0.22418	0.22676	0.22873	0.64648	0.22884	0.28765	0.19456	0.18591	0.19755	0.19035	0.19031	0.20852	0.24037	0.25416	0.23669	0.24689	0.28923	0.22809	0.5108	0.28415	0.28232	0.29156	0.28603
459	0.17678	0.17963	0.17864	0.17735	0.17867	0.17981	0.18213	0.17981	0.18003	0.18506	0.1842	0.18136	0.18468	0.18963	0.19699	0.19356	0.1894	0.19468	0.18591	0.18713	0.20208	0.20372	0.20988	0.18746	0.1891	0.18834	0.23344	0.23646	0.2388	0.78555	0.23913	0.31214	0.20018	0.19086	0.20341	0.19565	0.19552	0.21548	0.25311	0.26944	0.24872	0.26111	0.31503	0.23822	0.60703	0.30796	0.30485	0.31684	0.3101
460	0.18079	0.18387	0.18283	0.18138	0.18276	0.18408	0.18653	0.18403	0.18409	0.18974	0.18887	0.18549	0.18939	0.19468	0.20264	0.19907	0.19447	0.20027	0.19078	0.19203	0.2084	0.21016	0.21694	0.19242	0.19421	0.1933	0.24398	0.2475	0.25035	0.89656	0.25109	0.34388	0.20624	0.19613	0.20976	0.20132	0.20111	0.22316	0.26839	0.28803	0.26308	0.27845	0.34859	0.24989	0.71619	0.33888	0.33374	0.34959	0.34124
461	0.18497	0.18833	0.18723	0.18559	0.18703	0.18856	0.19116	0.18845	0.18832	0.19468	0.19381	0.18981	0.19438	0.20007	0.20873	0.20499	0.19988	0.20628	0.19594	0.19723	0.21527	0.21718	0.22473	0.19769	0.19966	0.19858	0.25611	0.26026	0.2638	0.93943	0.26527	0.38583	0.21282	0.20177	0.21669	0.20742	0.20713	0.23175	0.28715	0.31113	0.2806	0.30006	0.39264	0.26358	0.81407	0.37989	0.37174	0.39289	0.38237
462	0.18935	0.19301	0.19186	0.19001	0.19151	0.19328	0.19605	0.19309	0.19274	0.19993	0.19906	0.19434	0.1997	0.20584	0.21534	0.21138	0.20568	0.21279	0.20144	0.20279	0.22279	0.22489	0.23339	0.20333	0.2055	0.20423	0.27029	0.27522	0.2797	0.92294	0.28243	0.44175	0.22002	0.20785	0.22434	0.21405	0.21367	0.24146	0.31073	0.34043	0.30249	0.32758	0.45016	0.2799	0.87203	0.43489	0.42271	0.45071	0.4373
463	0.19395	0.19796	0.19674	0.19464	0.19622	0.19826	0.20123	0.19798	0.19739	0.20553	0.20467	0.19909	0.20539	0.21208	0.22258	0.21832	0.21192	0.21987	0.20734	0.20876	0.23107	0.23344	0.24312	0.20939	0.2118	0.21031	0.28715	0.29306	0.29884	0.87815	0.30372	0.51558	0.22797	0.21444	0.23285	0.22128	0.22082	0.25262	0.34104	0.37821	0.33053	0.36328	0.5231	0.29974	0.88193	0.50813	0.49151	0.52717	0.5101
464	0.19879	0.2032	0.2019	0.19953	0.20118	0.20354	0.20673	0.20315	0.20227	0.21154	0.21069	0.2041	0.21151	0.21885	0.23056	0.22592	0.21869	0.22766	0.2137	0.2152	0.24028	0.24301	0.25421	0.21594	0.21864	0.21688	0.30754	0.31472	0.3223	0.82189	0.33081	0.60882	0.23683	0.22165	0.24244	0.22925	0.22871	0.26566	0.38079	0.4274	0.36722	0.41008	0.60989	0.32434	0.85782	0.6017	0.58218	0.62344	0.60243
465	0.20391	0.20877	0.20738	0.20469	0.20644	0.20915	0.21262	0.20863	0.20743	0.21801	0.21717	0.20939	0.21815	0.22626	0.23947	0.23431	0.22608	0.23628	0.22059	0.2222	0.25061	0.25385	0.267	0.22305	0.2261	0.22404	0.33267	0.34153	0.35159	0.76062	0.36617	0.7145	0.24684	0.22959	0.25339	0.2381	0.23752	0.28116	0.43354	0.49107	0.41605	0.4714	0.70172	0.35546	0.8159	0.70931	0.69205	0.73094	0.70744
466	0.20933	0.21472	0.21323	0.21016	0.21203	0.21515	0.21893	0.21448	0.21288	0.22502	0.22421	0.215	0.22539	0.23444	0.24953	0.24365	0.2342	0.24593	0.22809	0.22987	0.26233	0.26627	0.28201	0.23085	0.23432	0.2319	0.36418	0.37532	0.38876	0.69766	0.4133	0.81114	0.25827	0.23842	0.26611	0.24805	0.24747	0.29994	0.5033	0.57089	0.48122	0.5498	0.78121	0.39548	0.76538	0.8093	0.80201	0.82575	0.80386
467	0.21509	0.2211	0.2195	0.21599	0.21799	0.22158	0.22575	0.22072	0.21868	0.23268	0.23189	0.22097	0.23336	0.24358	0.26104	0.25417	0.24322	0.25685	0.23634	0.23833	0.27579	0.28073	0.29991	0.23946	0.24345	0.24061	0.40424	0.41855	0.43642	0.63454	0.47662	0.87118	0.27154	0.24836	0.28111	0.25935	0.25886	0.32312	0.59228	0.66329	0.56613	0.64359	0.83022	0.44745	0.7111	0.87251	0.87889	0.88022	0.86438
468	0.22125	0.22799	0.22625	0.22222	0.22438	0.22853	0.23315	0.22743	0.22486	0.2411	0.24035	0.22734	0.24222	0.2539	0.2744	0.26614	0.25333	0.26937	0.24547	0.24775	0.29144	0.2978	0.32163	0.24904	0.25368	0.25033	0.45547	0.47423	0.49743	0.57195	0.55996	0.88379	0.28717	0.25968	0.29911	0.27238	0.2721	0.35213	0.69535	0.7548	0.66848	0.74123	0.84243	0.5145	0.6556	0.88663	0.90263	0.88677	0.87803
469	0.22786	0.23545	0.23356	0.22892	0.23127	0.23606	0.24123	0.23467	0.23148	0.25045	0.24974	0.23418	0.25216	0.26571	0.2902	0.27993	0.26478	0.2839	0.25567	0.25835	0.3099	0.31832	0.34845	0.25982	0.26528	0.26133	0.52026	0.54507	0.57347	0.51025	0.66176	0.86078	0.30586	0.27277	0.32106	0.28759	0.28774	0.38865	0.79345	0.82371	0.77255	0.82032	0.82525	0.59783	0.60017	0.8637	0.88326	0.8597	0.85606
470	0.23499	0.24359	0.24151	0.23616	0.23873	0.24427	0.25012	0.24253	0.23861	0.2609	0.26025	0.24155	0.26347	0.27943	0.3092	0.29606	0.27792	0.301	0.26718	0.27042	0.332	0.34337	0.38198	0.27209	0.27858	0.27391	0.59888	0.63092	0.66181	0.4497	0.76707	0.81847	0.3285	0.28812	0.34816	0.30562	0.30652	0.43421	0.85889	0.85418	0.84978	0.8606	0.78983	0.6922	0.5454	0.82091	0.84108	0.8151	0.8145
471	0.24271	0.25253	0.25023	0.24401	0.24686	0.25329	0.25999	0.2511	0.24632	0.27273	0.27214	0.24954	0.27652	0.29564	0.33246	0.31517	0.2932	0.32143	0.2803	0.28433	0.35885	0.37443	0.42411	0.28621	0.29405	0.2885	0.68567	0.72381	0.75065	0.39061	0.84724	0.76656	0.35616	0.30645	0.38181	0.32731	0.3294	0.48942	0.87751	0.84787	0.87978	0.8601	0.74411	0.78123	0.49153	0.76837	0.78823	0.7619	0.76309
472	0.25114	0.26241	0.25986	0.25259	0.25578	0.26327	0.27104	0.26051	0.25469	0.28627	0.28575	0.25823	0.29181	0.31514	0.36138	0.33815	0.31122	0.34612	0.29544	0.3006	0.39189	0.4133	0.47653	0.30269	0.31229	0.30567	0.76591	0.80475	0.8197	0.33353	0.88058	0.71004	0.39005	0.32867	0.4234	0.3537	0.35761	0.55278	0.85835	0.81709	0.8673	0.83138	0.69277	0.84196	0.43864	0.71115	0.73038	0.70466	0.70687
473	0.26039	0.27344	0.27056	0.26203	0.26564	0.2744	0.28353	0.2709	0.26386	0.30196	0.30153	0.26775	0.31004	0.33897	0.39764	0.36612	0.33275	0.37628	0.31314	0.3199	0.43288	0.46196	0.53962	0.3222	0.3341	0.32621	0.82043	0.85245	0.85251	0.27942	0.87057	0.65156	0.43141	0.35606	0.47401	0.38611	0.39264	0.61954	0.81776	0.77268	0.82964	0.78702	0.63851	0.86175	0.38686	0.65198	0.67054	0.64581	0.64856
474	0.27061	0.28585	0.28256	0.27249	0.27662	0.28692	0.29779	0.28248	0.27394	0.32037	0.32007	0.27823	0.33217	0.36856	0.44311	0.40052	0.35884	0.41334	0.33412	0.34314	0.48362	0.5218	0.61066	0.34564	0.36056	0.35117	0.83893	0.86003	0.84876	0.22974	0.83436	0.59253	0.48112	0.39027	0.53356	0.4261	0.43612	0.68152	0.76635	0.72104	0.77936	0.73449	0.58286	0.84656	0.33646	0.59225	0.61021	0.58661	0.58958
475	0.282	0.29994	0.29615	0.28418	0.28898	0.30112	0.31427	0.29546	0.28512	0.34227	0.34214	0.28986	0.3595	0.40563	0.49918	0.44302	0.39083	0.45883	0.35932	0.37155	0.54523	0.59218	0.68218	0.3742	0.39305	0.38196	0.82596	0.83705	0.81967	0.18633	0.7849	0.53365	0.53913	0.43331	0.59961	0.4752	0.48947	0.72929	0.7096	0.66579	0.72285	0.67787	0.52671	0.80987	0.28805	0.53268	0.55014	0.52771	0.53071
476	0.29478	0.3161	0.31167	0.29734	0.303	0.31739	0.33353	0.31012	0.2976	0.36867	0.3688	0.30284	0.39375	0.45213	0.5656	0.4952	0.4303	0.51389	0.38998	0.40669	0.61636	0.66795	0.74274	0.40943	0.43327	0.42036	0.7926	0.79636	0.77622	0.15075	0.72886	0.47535	0.60319	0.4873	0.66606	0.53422	0.55286	0.75616	0.65043	0.60897	0.66347	0.6194	0.47064	0.7617	0.24267	0.47372	0.49074	0.46947	0.4724
477	0.30926	0.33483	0.32959	0.3123	0.31907	0.33623	0.35632	0.32683	0.31163	0.40083	0.40138	0.31743	0.43703	0.50959	0.63847	0.55765	0.47887	0.57814	0.42764	0.45041	0.69078	0.73802	0.7815	0.45313	0.48302	0.46837	0.74781	0.7464	0.72519	0.12355	0.66975	0.41797	0.66773	0.55343	0.72337	0.60188	0.62346	0.761	0.59039	0.55171	0.603	0.56031	0.4151	0.70761	0.20173	0.41574	0.4323	0.41223	0.41502
478	0.3258	0.35676	0.35047	0.32947	0.3377	0.35825	0.38356	0.34602	0.32754	0.44019	0.44151	0.33394	0.49146	0.57768	0.70845	0.62816	0.53746	0.64789	0.474	0.50447	0.75636	0.78836	0.79405	0.50703	0.54344	0.52754	0.69695	0.6918	0.67036	0.10398	0.60943	0.36196	0.72385	0.62971	0.76188	0.67276	0.6936	0.74739	0.53032	0.49467	0.54239	0.50129	0.36063	0.65069	0.16667	0.35921	0.37521	0.35643	0.35906
479	0.34488	0.38268	0.37503	0.34936	0.35951	0.38421	0.41635	0.36821	0.34572	0.48811	0.49082	0.35274	0.55804	0.65192	0.76259	0.69949	0.6047	0.71453	0.5304	0.56939	0.79957	0.80996	0.78338	0.57166	0.61335	0.59737	0.64306	0.63511	0.61385	0.090514	0.54888	0.30803	0.76232	0.70786	0.77674	0.7364	0.75132	0.72043	0.47075	0.43831	0.48219	0.44285	0.30804	0.59262	0.13842	0.30491	0.32009	0.3028	0.30527
480	0.36707	0.41349	0.40414	0.37262	0.38528	0.41499	0.45582	0.39402	0.36664	0.54502	0.5502	0.37429	0.63411	0.72184	0.7909	0.75942	0.67482	0.7662	0.59648	0.64215	0.81377	0.80383	0.75591	0.64414	0.68669	0.67255	0.58789	0.57774	0.55686	0.081566	0.48868	0.25735	0.77803	0.77306	0.7695	0.78069	0.78573	0.68458	0.41211	0.38305	0.42288	0.38548	0.25851	0.53434	0.11697	0.25405	0.26799	0.25254	0.25483
481	0.39308	0.45018	0.43876	0.40002	0.41591	0.45151	0.50275	0.42414	0.39086	0.609	0.61806	0.39906	0.71057	0.77376	0.79172	0.79595	0.73705	0.79343	0.66794	0.71398	0.80186	0.77727	0.7176	0.71589	0.75169	0.74146	0.53242	0.52048	0.50004	0.075841	0.42928	0.21149	0.77184	0.81089	0.74536	0.79836	0.79289	0.64304	0.35498	0.32951	0.36499	0.32988	0.21359	0.47642	0.10145	0.20825	0.22043	0.20725	0.20933
482	0.42371	0.49348	0.47978	0.43241	0.45234	0.49447	0.55677	0.4592	0.419	0.67407	0.68811	0.42755	0.77225	0.79787	0.77073	0.80426	0.77914	0.79437	0.73477	0.77101	0.77187	0.73803	0.67262	0.77324	0.79474	0.78946	0.47721	0.46376	0.44383	0.072399	0.3712	0.17219	0.74861	0.8165	0.70985	0.79061	0.7768	0.59792	0.30024	0.2786	0.30936	0.27712	0.17496	0.41928	0.090637	0.16926	0.1792	0.16866	0.1705
483	0.45976	0.54335	0.52756	0.47059	0.49526	0.54377	0.61515	0.4996	0.45165	0.73013	0.74866	0.4602	0.80577	0.79405	0.73526	0.78842	0.79449	0.7741	0.78366	0.8015	0.73086	0.6913	0.62366	0.80433	0.80882	0.80788	0.42265	0.40797	0.38862	0.07058	0.31524	0.14065	0.71366	0.79598	0.66701	0.76397	0.74451	0.55059	0.2492	0.23165	0.25726	0.2287	0.14376	0.36344	0.08336	0.1382	0.14571	0.13788	0.13944
484	0.50177	0.59808	0.58122	0.51498	0.54452	0.59773	0.67199	0.54504	0.48919	0.76674	0.78725	0.49715	0.80762	0.76885	0.69093	0.75598	0.78469	0.73953	0.80513	0.80256	0.68349	0.64035	0.57244	0.80602	0.7963	0.7981	0.36917	0.35356	0.33497	0.069913	0.26262	0.11697	0.67117	0.7587	0.61964	0.72525	0.70211	0.50194	0.2036	0.19028	0.21039	0.18641	0.12015	0.30963	0.078673	0.11505	0.12032	0.11491	0.1162
485	0.54952	0.65321	0.63742	0.56493	0.59821	0.65202	0.7188	0.59389	0.53143	0.77872	0.79797	0.53795	0.78461	0.72999	0.64127	0.71342	0.75661	0.69614	0.79924	0.78033	0.6325	0.5871	0.52001	0.78427	0.76522	0.76828	0.31739	0.30124	0.28376	0.070073	0.21502	0.10013	0.62395	0.71176	0.56951	0.6792	0.65358	0.45261	0.16517	0.1559	0.17053	0.15171	0.1032	0.25904	0.075879	0.098688	0.10214	0.098647	0.09971
486	0.60124	0.70174	0.68994	0.61789	0.65183	0.6999	0.74789	0.64264	0.57709	0.76783	0.78357	0.58115	0.74579	0.68296	0.58851	0.66494	0.71691	0.64751	0.7726	0.74301	0.57964	0.53276	0.46709	0.74728	0.7228	0.72623	0.26827	0.25216	0.23626	0.070822	0.17427	0.088634	0.57389	0.65941	0.51781	0.62888	0.6015	0.40317	0.13492	0.12915	0.13886	0.12512	0.09154	0.2132	0.074459	0.087576	0.089691	0.087588	0.08847
487	0.65272	0.73596	0.7306	0.66863	0.69828	0.73391	0.75594	0.68576	0.62318	0.7401	0.7517	0.62385	0.69787	0.63107	0.53405	0.61305	0.67019	0.59583	0.73296	0.69679	0.5259	0.47807	0.41424	0.70129	0.67377	0.67708	0.2232	0.20784	0.19412	0.071994	0.14165	0.081061	0.5222	0.60408	0.46538	0.57614	0.54742	0.35429	0.11261	0.10952	0.11534	0.10594	0.083797	0.17385	0.074041	0.08029	0.081449	0.080327	0.081073
488	0.69743	0.75091	0.75278	0.71002	0.73017	0.74914	0.74468	0.71719	0.66493	0.70141	0.7091	0.6618	0.64476	0.57644	0.47882	0.55935	0.61936	0.54252	0.68567	0.64545	0.47196	0.4236	0.36207	0.65014	0.62098	0.6239	0.18377	0.16993	0.15883	0.073466	0.11727	0.07629	0.46974	0.54727	0.4129	0.52219	0.49242	0.30679	0.097005	0.095773	0.09879	0.092707	0.078883	0.1422	0.074351	0.075731	0.076215	0.075781	0.076426
489	0.72843	0.74635	0.75442	0.73549	0.74302	0.74523	0.71865	0.73258	0.69675	0.65592	0.66018	0.69028	0.58876	0.52037	0.42357	0.50484	0.56621	0.48849	0.63396	0.59123	0.4183	0.36994	0.31141	0.59609	0.56616	0.56852	0.15127	0.13953	0.13115	0.075153	0.10004	0.07352	0.41718	0.48993	0.36106	0.46781	0.43725	0.2618	0.086494	0.086499	0.087603	0.083908	0.075997	0.11835	0.075189	0.073116	0.073121	0.07317	0.073741
490	0.74111	0.7255	0.73783	0.7418	0.73668	0.72518	0.68248	0.73083	0.71416	0.60638	0.60766	0.70559	0.53133	0.4638	0.36902	0.45021	0.51192	0.43439	0.57985	0.53557	0.36545	0.31784	0.26341	0.54059	0.51044	0.51215	0.12617	0.11669	0.11078	0.076991	0.08837	0.072168	0.3652	0.43278	0.31075	0.41363	0.38263	0.22064	0.07966	0.080472	0.080297	0.078279	0.074556	0.10139	0.076409	0.071877	0.071542	0.071932	0.072449
491	0.73511	0.69296	0.70775	0.73006	0.71461	0.69343	0.63971	0.71401	0.71542	0.55446	0.55316	0.70629	0.47341	0.40746	0.31609	0.39602	0.45725	0.38084	0.52454	0.47937	0.31413	0.26841	0.21955	0.48452	0.45453	0.45557	0.10787	0.10045	0.096491	0.078937	0.080721	0.071833	0.31464	0.37647	0.26314	0.3603	0.3294	0.18468	0.075431	0.076772	0.075738	0.074901	0.074152	0.08981	0.077906	0.071624	0.071047	0.071679	0.072156
492	0.71359	0.65258	0.66861	0.70412	0.68121	0.65377	0.59271	0.68568	0.70184	0.50126	0.49773	0.69344	0.41575	0.35217	0.26606	0.34297	0.40285	0.3286	0.46884	0.42332	0.26542	0.22312	0.1814	0.42857	0.39907	0.39945	0.0951	0.089354	0.08684	0.080961	0.075933	0.072229	0.26664	0.32189	0.21967	0.30868	0.27869	0.15493	0.07306	0.074747	0.073135	0.073131	0.074494	0.082181	0.079604	0.07208	0.071331	0.072134	0.07258
493	0.68062	0.60714	0.62365	0.66812	0.64022	0.60897	0.54309	0.64917	0.67626	0.44759	0.44216	0.6694	0.35916	0.29901	0.22049	0.29198	0.34944	0.27869	0.4134	0.36812	0.22076	0.18357	0.15014	0.3734	0.34479	0.34458	0.086511	0.082045	0.080562	0.08304	0.073158	0.073144	0.22265	0.27023	0.18189	0.25995	0.23196	0.13169	0.071999	0.073913	0.071911	0.072499	0.075366	0.077372	0.081447	0.073038	0.072168	0.073091	0.073513
494	0.63997	0.55852	0.57506	0.62547	0.59431	0.56091	0.49196	0.60717	0.64192	0.39414	0.38711	0.63696	0.3047	0.2494	0.18107	0.24436	0.29798	0.23253	0.3589	0.31467	0.18176	0.1511	0.1261	0.31985	0.29267	0.292	0.080951	0.07744	0.076692	0.08516	0.071813	0.07443	0.18422	0.22309	0.15095	0.21563	0.19089	0.11448	0.071874	0.073934	0.07167	0.072678	0.076617	0.074564	0.083396	0.074355	0.0734	0.074407	0.074811
495	0.59435	0.50795	0.52426	0.57855	0.54528	0.51085	0.44011	0.56156	0.60153	0.34167	0.33338	0.59857	0.25379	0.20509	0.14906	0.20173	0.24977	0.19177	0.30623	0.2642	0.14974	0.12613	0.10863	0.26909	0.2441	0.24311	0.077562	0.074764	0.074541	0.087312	0.071488	0.07598	0.15261	0.18223	0.12717	0.17737	0.15692	0.10227	0.072418	0.074568	0.072132	0.073439	0.078139	0.073185	0.085423	0.075928	0.074913	0.07598	0.076368
496	0.54553	0.45636	0.47225	0.5289	0.49436	0.45969	0.3883	0.51363	0.55704	0.29122	0.28207	0.55606	0.20822	0.16772	0.12471	0.16565	0.20646	0.15782	0.25667	0.21832	0.1251	0.108	0.096485	0.22269	0.20077	0.19966	0.075745	0.073477	0.07363	0.08949	0.071895	0.077721	0.12818	0.14902	0.10987	0.14633	0.13058	0.093913	0.073442	0.075645	0.073099	0.074616	0.079856	0.072834	0.08751	0.077684	0.076629	0.077737	0.078112
497	0.49478	0.40451	0.41984	0.47768	0.44251	0.40821	0.33733	0.46433	0.50987	0.24417	0.23466	0.5108	0.16968	0.13823	0.10724	0.13704	0.16963	0.13133	0.21185	0.17875	0.10722	0.095447	0.088355	0.18239	0.16429	0.16324	0.075054	0.073182	0.073603	0.091692	0.072822	0.079596	0.11038	0.12379	0.097849	0.12273	0.11139	0.088432	0.074807	0.077038	0.074423	0.076088	0.081711	0.073214	0.089644	0.07957	0.078487	0.079624	0.079988
498	0.44306	0.35321	0.36778	0.42577	0.39054	0.35717	0.28829	0.41443	0.46108	0.20212	0.19284	0.4638	0.13923	0.11645	0.095279	0.11578	0.14027	0.11192	0.17345	0.14673	0.094858	0.087081	0.083142	0.14951	0.13555	0.13469	0.075175	0.073597	0.074209	0.093914	0.074117	0.081566	0.098004	0.10577	0.089822	0.10581	0.098096	0.085058	0.076412	0.078656	0.076	0.07777	0.083666	0.074116	0.091817	0.081547	0.080447	0.081604	0.081958
499	0.39118	0.30343	0.31701	0.37399	0.33937	0.30752	0.24254	0.36469	0.41153	0.16663	0.15813	0.41589	0.11674	0.10122	0.087382	0.1008	0.11835	0.098396	0.14263	0.12253	0.086613	0.081724	0.080023	0.12447	0.11436	0.11373	0.075879	0.07452	0.075269	0.096158	0.075675	0.083606	0.08973	0.093477	0.084686	0.094216	0.089225	0.083221	0.07819	0.080436	0.077757	0.0796	0.085693	0.07539	0.094023	0.083592	0.08248	0.083651	0.083996
500	0.34002	0.25645	0.26871	0.3233	0.29008	0.26049	0.20169	0.31599	0.36207	0.13854	0.13119	0.36786	0.10104	0.091	0.082385	0.090684	0.10287	0.089324	0.11952	0.10529	0.081332	0.078514	0.07841	0.10653	0.099557	0.099148	0.077004	0.075807	0.076653	0.098424	0.077419	0.085698	0.084424	0.085387	0.081626	0.086552	0.083534	0.082501	0.080089	0.082333	0.079641	0.081537	0.087773	0.07693	0.096259	0.085686	0.084566	0.085748	0.086085
501	0.2907	0.21384	0.22439	0.27488	0.24411	0.21762	0.16718	0.26947	0.31368	0.11768	0.11159	0.32061	0.090514	0.084375	0.079451	0.084084	0.092374	0.083468	0.10315	0.093554	0.078173	0.076843	0.077878	0.094255	0.089613	0.089387	0.07843	0.077355	0.07827	0.10071	0.079294	0.087828	0.081247	0.080271	0.080058	0.081704	0.080104	0.082592	0.082076	0.084315	0.081617	0.08355	0.089896	0.078659	0.098526	0.087817	0.086692	0.087883	0.088211
502	0.24463	0.17717	0.1857	0.23026	0.20305	0.18048	0.13984	0.22656	0.26757	0.10299	0.098011	0.27526	0.083691	0.080297	0.077991	0.079996	0.085509	0.079909	0.092056	0.085835	0.076537	0.076276	0.078122	0.08615	0.083168	0.083083	0.080072	0.079088	0.080052	0.10303	0.081264	0.089989	0.0796	0.07726	0.079562	0.078865	0.078289	0.083269	0.084125	0.08636	0.083658	0.085619	0.092052	0.080523	0.10082	0.089978	0.08885	0.090049	0.090369
503	0.20344	0.14752	0.15393	0.19108	0.16841	0.15023	0.11947	0.18884	0.22524	0.093056	0.08896	0.23316	0.079487	0.078033	0.077584	0.077706	0.081241	0.077996	0.084791	0.080979	0.075997	0.076501	0.078922	0.081018	0.079212	0.079233	0.081871	0.080955	0.081954	0.10537	0.0833	0.092177	0.079051	0.075753	0.079834	0.07747	0.077629	0.084367	0.086221	0.088454	0.085747	0.087731	0.094236	0.082484	0.10315	0.092164	0.091034	0.09224	0.092552
504	0.16864	0.12503	0.12948	0.15866	0.14098	0.12711	0.10506	0.15757	0.18822	0.086586	0.083158	0.19583	0.077139	0.07706	0.077928	0.076703	0.078826	0.077262	0.080257	0.078155	0.076241	0.07729	0.080119	0.077997	0.077027	0.077128	0.083782	0.082918	0.083942	0.10775	0.085385	0.094388	0.079288	0.075318	0.080653	0.077106	0.077792	0.085771	0.088353	0.090586	0.087873	0.089875	0.096447	0.084515	0.10551	0.094373	0.093241	0.094456	0.094759
505	0.14107	0.10892	0.11178	0.13354	0.12059	0.11045	0.095291	0.13325	0.15772	0.082594	0.079659	0.16451	0.076107	0.077004	0.078803	0.076617	0.077733	0.077369	0.077657	0.076777	0.077043	0.07848	0.081598	0.076479	0.076104	0.076264	0.085776	0.084951	0.085993	0.11015	0.087506	0.096622	0.080084	0.075643	0.081863	0.077476	0.078538	0.087394	0.090513	0.092751	0.090027	0.092047	0.098682	0.086597	0.1079	0.096604	0.09547	0.096694	0.096988
506	0.12059	0.097905	0.099567	0.11522	0.10623	0.098988	0.088929	0.11543	0.13412	0.080371	0.077798	0.13981	0.07601	0.077598	0.080055	0.077186	0.077583	0.078073	0.076438	0.07643	0.078244	0.079957	0.08328	0.076031	0.07608	0.076284	0.08783	0.087035	0.088092	0.1126	0.089656	0.098879	0.081277	0.076508	0.083352	0.078368	0.0797	0.089176	0.092698	0.094944	0.092206	0.094242	0.10094	0.088719	0.11034	0.098857	0.097722	0.098955	0.09924
507	0.10617	0.090656	0.091474	0.10253	0.09655	0.091411	0.085009	0.10302	0.11692	0.079413	0.077106	0.12147	0.076578	0.078653	0.081576	0.078221	0.078106	0.079204	0.076203	0.076816	0.079729	0.081638	0.085107	0.076346	0.076696	0.076931	0.089932	0.089159	0.090227	0.11509	0.09183	0.10116	0.082755	0.077756	0.08504	0.079633	0.081156	0.091076	0.094905	0.097164	0.094407	0.096461	0.10323	0.090872	0.11281	0.10113	0.099996	0.10124	0.10152
508	0.096461	0.086116	0.08634	0.094078	0.090277	0.086632	0.082838	0.094723	0.10498	0.079358	0.077245	0.10855	0.077615	0.080034	0.083287	0.079587	0.079107	0.080638	0.076669	0.077722	0.081417	0.083465	0.087039	0.077202	0.077766	0.078023	0.092071	0.091316	0.092394	0.11762	0.094025	0.10347	0.084436	0.079276	0.086871	0.081163	0.082822	0.093062	0.097134	0.09941	0.096629	0.098702	0.10554	0.093052	0.11533	0.10344	0.1023	0.10355	0.10382
509	0.090176	0.083509	0.083315	0.088696	0.086441	0.083851	0.081918	0.089419	0.097039	0.079946	0.077976	0.099822	0.078986	0.081648	0.085135	0.081189	0.080447	0.082289	0.077632	0.078997	0.08325	0.085396	0.089048	0.078442	0.079158	0.07943	0.094241	0.0935	0.094587	0.12021	0.09624	0.1058	0.086263	0.080989	0.088806	0.082882	0.084637	0.095115	0.099385	0.10168	0.098872	0.10097	0.10789	0.095255	0.1179	0.10576	0.10462	0.10589	0.10615
510	0.086337	0.082283	0.081792	0.085497	0.084343	0.082499	0.08189	0.086261	0.091997	0.080991	0.079126	0.094195	0.080592	0.083426	0.08708	0.08296	0.082029	0.084093	0.078948	0.080534	0.085186	0.087404	0.091115	0.079956	0.08078	0.081062	0.096439	0.095709	0.096805	0.12285	0.098475	0.10817	0.088194	0.08284	0.090818	0.084735	0.086559	0.097221	0.10166	0.10398	0.10114	0.10326	0.11026	0.097482	0.12053	0.10812	0.10698	0.10826	0.1085
511	0.084243	0.082043	0.081344	0.083859	0.083486	0.08217	0.0825	0.084642	0.089037	0.082363	0.080574	0.090805	0.082365	0.085321	0.089097	0.084851	0.083784	0.086009	0.080516	0.082258	0.087199	0.089468	0.093226	0.081663	0.082565	0.082853	0.098662	0.097942	0.099047	0.12555	0.10073	0.11057	0.090204	0.084788	0.092887	0.086687	0.08856	0.099369	0.10396	0.10631	0.10343	0.10557	0.11268	0.099731	0.12322	0.11051	0.10936	0.11067	0.1109
512	0.083403	0.082511	0.081667	0.083341	0.08352	0.082574	0.083565	0.084132	0.087579	0.083969	0.082236	0.089034	0.084259	0.087302	0.091167	0.086831	0.085664	0.088007	0.082264	0.084116	0.089269	0.091576	0.095374	0.08351	0.084467	0.084758	0.10091	0.1002	0.10131	0.12832	0.10301	0.113	0.092272	0.086808	0.095002	0.08871	0.090619	0.10155	0.10629	0.10868	0.10574	0.10792	0.11513	0.102	0.12597	0.11294	0.11179	0.11311	0.11332
513	0.08344	0.083474	0.082527	0.083606	0.084175	0.08349	0.084951	0.084399	0.087175	0.085739	0.084048	0.088403	0.086236	0.089344	0.093277	0.088874	0.087633	0.090063	0.084138	0.086068	0.091382	0.093719	0.097552	0.085455	0.086453	0.086744	0.10319	0.10248	0.10361	0.13117	0.10531	0.11548	0.094385	0.088879	0.097153	0.090786	0.092721	0.10377	0.10864	0.11107	0.10809	0.11029	0.11762	0.1043	0.1288	0.11541	0.11425	0.1156	0.11579
514	0.084091	0.084783	0.083763	0.084419	0.085265	0.084767	0.086561	0.085212	0.08751	0.087627	0.085966	0.088575	0.088275	0.091431	0.09542	0.090964	0.089666	0.092165	0.086102	0.088088	0.093529	0.09589	0.099758	0.08747	0.088498	0.088788	0.10549	0.10479	0.10593	0.1341	0.10765	0.118	0.096535	0.090989	0.099336	0.092902	0.094858	0.10602	0.11103	0.11351	0.11046	0.1127	0.12016	0.10663	0.1317	0.11792	0.11676	0.11812	0.1183
515	0.08518	0.08634	0.085269	0.085623	0.086665	0.086301	0.088334	0.086415	0.088374	0.0896	0.087961	0.089321	0.090358	0.093554	0.097591	0.093092	0.091748	0.094303	0.088131	0.090158	0.095705	0.098087	0.10199	0.089536	0.090589	0.090876	0.10782	0.10713	0.10828	0.13712	0.11001	0.12057	0.098716	0.09313	0.10155	0.095052	0.097024	0.10831	0.11345	0.11598	0.11287	0.11515	0.12275	0.10899	0.1347	0.12048	0.11931	0.1207	0.12086
516	0.086583	0.088076	0.086968	0.087107	0.088289	0.088021	0.090225	0.0879	0.089616	0.091637	0.090013	0.09048	0.092477	0.095706	0.099787	0.095251	0.093868	0.096471	0.09021	0.092267	0.097907	0.10031	0.10425	0.091643	0.092715	0.092999	0.11019	0.10949	0.11066	0.14024	0.1124	0.12319	0.10093	0.095298	0.10379	0.097231	0.099217	0.11062	0.11592	0.1185	0.11532	0.11764	0.12539	0.11137	0.13779	0.12309	0.12191	0.12334	0.12347
517	0.088214	0.089945	0.08881	0.088796	0.090076	0.089878	0.092204	0.089589	0.091135	0.093723	0.092109	0.09194	0.094624	0.097884	0.10201	0.097438	0.09602	0.098667	0.092327	0.094408	0.10013	0.10255	0.10654	0.093783	0.094871	0.09515	0.11259	0.1119	0.11308	0.14347	0.11483	0.12587	0.10316	0.097489	0.10605	0.099436	0.10143	0.11297	0.11842	0.12107	0.11781	0.12018	0.1281	0.1138	0.141	0.12576	0.12457	0.12603	0.12614
518	0.090005	0.091906	0.090752	0.090628	0.091979	0.091832	0.094248	0.091423	0.092846	0.095848	0.09424	0.09361	0.096797	0.10009	0.10425	0.099649	0.0982	0.10089	0.094475	0.096576	0.10239	0.10483	0.10885	0.095949	0.097053	0.097326	0.11502	0.11434	0.11554	0.14683	0.1173	0.12862	0.10543	0.099703	0.10835	0.10167	0.10368	0.11535	0.12098	0.1237	0.12034	0.12276	0.13087	0.11626	0.14432	0.12849	0.1273	0.12879	0.12888
519	0.091914	0.093939	0.09277	0.092566	0.093967	0.093859	0.096342	0.093365	0.0947	0.098005	0.096399	0.095437	0.098991	0.10231	0.10652	0.10189	0.1004	0.10313	0.09665	0.098767	0.10466	0.10712	0.11119	0.09814	0.099258	0.099525	0.1175	0.11682	0.11804	0.15034	0.11981	0.13143	0.10772	0.10194	0.11067	0.10392	0.10594	0.11777	0.12358	0.12638	0.12292	0.1254	0.13371	0.11877	0.14778	0.13129	0.13009	0.13162	0.13168
520	0.093899	0.09602	0.094838	0.094573	0.096013	0.095937	0.098473	0.095377	0.096647	0.10019	0.098583	0.097364	0.10121	0.10456	0.10882	0.10415	0.10263	0.1054	0.098848	0.10098	0.10697	0.10945	0.11357	0.10035	0.10149	0.10175	0.12002	0.11934	0.12058	0.15401	0.12236	0.13433	0.11004	0.1042	0.11303	0.1062	0.10824	0.12023	0.12624	0.12913	0.12556	0.12811	0.13664	0.12132	0.15139	0.13416	0.13296	0.13453	0.13455
521	0.095947	0.098143	0.096949	0.096638	0.098108	0.098057	0.10064	0.097449	0.098669	0.1024	0.10079	0.099374	0.10344	0.10683	0.11114	0.10643	0.10489	0.1077	0.10107	0.10322	0.1093	0.1118	0.11598	0.10259	0.10374	0.10399	0.12258	0.12191	0.12318	0.15785	0.12497	0.13731	0.11239	0.10648	0.11542	0.10851	0.11056	0.12273	0.12896	0.13194	0.12826	0.13087	0.13965	0.12392	0.15517	0.13712	0.13591	0.13752	0.13752
522	0.098044	0.1003	0.099096	0.098748	0.10024	0.10021	0.10283	0.099568	0.10075	0.10463	0.10302	0.10145	0.1057	0.10912	0.11349	0.10874	0.10716	0.11003	0.10331	0.10548	0.11167	0.11419	0.11843	0.10485	0.10601	0.10625	0.1252	0.12454	0.12583	0.16191	0.12764	0.14038	0.11477	0.10879	0.11784	0.11084	0.11291	0.12527	0.13175	0.13484	0.13102	0.13371	0.14276	0.12658	0.15914	0.14018	0.13895	0.14062	0.14057
523	0.10018	0.10249	0.10127	0.1009	0.10241	0.1024	0.10505	0.10173	0.10288	0.10689	0.10527	0.10358	0.10799	0.11145	0.11587	0.11109	0.10947	0.11238	0.10558	0.10776	0.11406	0.11662	0.12093	0.10713	0.10831	0.10854	0.12788	0.12722	0.12854	0.16621	0.13037	0.14356	0.11719	0.11112	0.12031	0.11321	0.11529	0.12787	0.13462	0.13782	0.13385	0.13663	0.14598	0.12931	0.16333	0.14333	0.1421	0.14382	0.14373
524	0.10235	0.10471	0.10348	0.10307	0.10461	0.10462	0.1073	0.10392	0.10505	0.10918	0.10755	0.10574	0.1103	0.1138	0.11829	0.11346	0.1118	0.11477	0.10787	0.11007	0.1165	0.11908	0.12346	0.10944	0.11064	0.11086	0.13062	0.12997	0.13132	0.17078	0.13316	0.14686	0.11965	0.11349	0.12282	0.11561	0.1177	0.13052	0.13756	0.14089	0.13676	0.13963	0.14932	0.1321	0.16777	0.1466	0.14535	0.14714	0.147
525	0.10455	0.10695	0.10571	0.10528	0.10683	0.10686	0.10958	0.10614	0.10725	0.11149	0.10986	0.10795	0.11263	0.11619	0.12075	0.11587	0.11417	0.1172	0.11019	0.11241	0.11897	0.12158	0.12605	0.11177	0.113	0.11321	0.13343	0.13279	0.13417	0.17568	0.13603	0.15029	0.12215	0.11589	0.12537	0.11805	0.12016	0.13323	0.1406	0.14407	0.13976	0.14273	0.1528	0.13496	0.1725	0.14999	0.14874	0.15059	0.15039
526	0.10678	0.10922	0.10797	0.10752	0.10908	0.10914	0.11188	0.10839	0.10949	0.11384	0.11219	0.11019	0.115	0.11861	0.12325	0.11831	0.11656	0.11966	0.11254	0.11478	0.12149	0.12413	0.12868	0.11414	0.11539	0.11558	0.13632	0.13569	0.1371	0.18097	0.13898	0.15386	0.1247	0.11833	0.12797	0.12053	0.12265	0.13601	0.14374	0.14736	0.14285	0.14594	0.15642	0.1379	0.17756	0.15353	0.15226	0.1542	0.15393
527	0.10903	0.11152	0.11026	0.10978	0.11136	0.11144	0.11422	0.11067	0.11175	0.11621	0.11455	0.11247	0.1174	0.12106	0.12579	0.1208	0.119	0.12217	0.11492	0.11718	0.12405	0.12673	0.13138	0.11654	0.11781	0.11799	0.13928	0.13866	0.14012	0.18671	0.14202	0.15759	0.12729	0.1208	0.13063	0.12305	0.12519	0.13885	0.14698	0.15078	0.14605	0.14927	0.16022	0.14093	0.18301	0.15723	0.15594	0.15796	0.15763
528	0.11132	0.11385	0.11257	0.11207	0.11367	0.11377	0.11658	0.11299	0.11405	0.11862	0.11694	0.11477	0.11984	0.12356	0.12838	0.12333	0.12147	0.12472	0.11734	0.11962	0.12667	0.12939	0.13414	0.11898	0.12028	0.12044	0.14234	0.14174	0.14324	0.19302	0.14516	0.16151	0.12994	0.12332	0.13334	0.12561	0.12778	0.14177	0.15035	0.15434	0.14937	0.15272	0.1642	0.14406	0.18891	0.1611	0.15979	0.16192	0.1615
529	0.11363	0.11621	0.11491	0.1144	0.11601	0.11613	0.11898	0.11533	0.11637	0.12107	0.11938	0.11711	0.12232	0.1261	0.13103	0.12591	0.12398	0.12732	0.11979	0.1221	0.12934	0.1321	0.13696	0.12145	0.12278	0.12293	0.1455	0.14491	0.14646	0.20001	0.14841	0.16564	0.13265	0.12589	0.13612	0.12823	0.13042	0.14477	0.15386	0.15806	0.15281	0.15633	0.16841	0.1473	0.19537	0.16518	0.16385	0.16609	0.16558
530	0.11597	0.1186	0.11729	0.11675	0.11838	0.11852	0.12142	0.1177	0.11873	0.12356	0.12184	0.11948	0.12483	0.12869	0.13373	0.12854	0.12655	0.12998	0.12228	0.12462	0.13207	0.13488	0.13987	0.12397	0.12533	0.12546	0.14877	0.14819	0.1498	0.20788	0.15178	0.17	0.13542	0.1285	0.13897	0.13091	0.13312	0.14786	0.15751	0.16197	0.1564	0.1601	0.17287	0.15066	0.20249	0.16949	0.16813	0.17051	0.16989
531	0.11834	0.12103	0.1197	0.11913	0.12078	0.12095	0.12389	0.12011	0.12112	0.12609	0.12436	0.12189	0.1274	0.13134	0.13649	0.13122	0.12916	0.13269	0.12482	0.12719	0.13487	0.13773	0.14285	0.12654	0.12793	0.12804	0.15215	0.1516	0.15327	0.21688	0.15528	0.17464	0.13826	0.13117	0.1419	0.13364	0.13588	0.15105	0.16135	0.16607	0.16016	0.16406	0.17763	0.15415	0.21044	0.17407	0.17268	0.17521	0.17447
532	0.12075	0.12349	0.12214	0.12155	0.12322	0.12342	0.12641	0.12256	0.12355	0.12866	0.12691	0.12433	0.13001	0.13404	0.13932	0.13397	0.13182	0.13547	0.1274	0.1298	0.13773	0.14065	0.14592	0.12915	0.13059	0.13067	0.15568	0.15515	0.15689	0.22735	0.15893	0.17961	0.14117	0.1339	0.14491	0.13644	0.13871	0.15435	0.16537	0.17042	0.1641	0.16824	0.18274	0.1578	0.21941	0.17896	0.17753	0.18024	0.17936
533	0.12319	0.126	0.12463	0.124	0.1257	0.12593	0.12897	0.12505	0.12602	0.13129	0.12952	0.12681	0.13268	0.1368	0.14222	0.13678	0.13454	0.13832	0.13004	0.13247	0.14068	0.14366	0.14909	0.13182	0.1333	0.13335	0.15935	0.15886	0.16067	0.23984	0.16276	0.18495	0.14417	0.1367	0.14801	0.13931	0.14161	0.15776	0.16962	0.17503	0.16825	0.17266	0.18826	0.16161	0.22971	0.18422	0.18273	0.18566	0.18461
534	0.12567	0.12855	0.12715	0.12649	0.12821	0.12848	0.13158	0.12757	0.12852	0.13397	0.13217	0.12934	0.1354	0.13962	0.14521	0.13967	0.13733	0.14124	0.13273	0.13521	0.14372	0.14676	0.15237	0.13455	0.13607	0.1361	0.16319	0.16273	0.16464	0.25513	0.16677	0.19073	0.14726	0.13956	0.15121	0.14226	0.1446	0.16131	0.17413	0.17995	0.17265	0.17737	0.19429	0.16561	0.24172	0.18991	0.18835	0.19153	0.1903
535	0.12819	0.13115	0.12973	0.12903	0.13078	0.13109	0.13424	0.13015	0.13107	0.13671	0.13489	0.13191	0.13819	0.14252	0.14828	0.14264	0.14019	0.14424	0.13548	0.138	0.14685	0.14996	0.15576	0.13734	0.13892	0.13891	0.16723	0.16681	0.16881	0.27446	0.17101	0.19706	0.15044	0.1425	0.15452	0.1453	0.14767	0.16501	0.17894	0.18525	0.17733	0.18242	0.20095	0.16982	0.25604	0.19612	0.19447	0.19796	0.19651
536	0.13076	0.1338	0.13235	0.13161	0.13339	0.13374	0.13696	0.13277	0.13367	0.13952	0.13767	0.13453	0.14105	0.1455	0.15145	0.14569	0.14312	0.14734	0.1383	0.14087	0.15008	0.15327	0.15929	0.14021	0.14183	0.14179	0.17148	0.1711	0.17323	0.29976	0.17549	0.20405	0.15374	0.14553	0.15795	0.14843	0.15083	0.16887	0.18411	0.19099	0.18233	0.18788	0.20838	0.17429	0.27356	0.20298	0.20119	0.20507	0.20337
537	0.13338	0.13651	0.13503	0.13424	0.13605	0.13645	0.13974	0.13545	0.13632	0.14239	0.14052	0.1372	0.14399	0.14857	0.15472	0.14884	0.14614	0.15054	0.1412	0.14381	0.15342	0.1567	0.16296	0.14314	0.14483	0.14475	0.17597	0.17565	0.17792	0.33411	0.18026	0.21186	0.15715	0.14865	0.16151	0.15166	0.15411	0.17292	0.18969	0.19727	0.18773	0.19381	0.21682	0.17904	0.29558	0.21064	0.20865	0.21303	0.21102
538	0.13605	0.13927	0.13776	0.13693	0.13877	0.13922	0.14258	0.13819	0.13902	0.14534	0.14344	0.13993	0.147	0.15173	0.15811	0.15209	0.14924	0.15384	0.14417	0.14683	0.15689	0.16027	0.1668	0.14617	0.14792	0.1478	0.18075	0.18049	0.18292	0.38232	0.18537	0.22073	0.16069	0.15188	0.16522	0.155	0.15749	0.17717	0.19578	0.20419	0.19361	0.20035	0.22654	0.18412	0.32413	0.21932	0.21704	0.22205	0.21968
539	0.13877	0.1421	0.14056	0.13967	0.14155	0.14206	0.1455	0.14099	0.14178	0.14838	0.14644	0.14271	0.15011	0.15499	0.16162	0.15546	0.15244	0.15726	0.14722	0.14994	0.1605	0.16398	0.17081	0.14928	0.15111	0.15093	0.18586	0.18566	0.18829	0.45147	0.19088	0.23096	0.16439	0.15521	0.1691	0.15847	0.16101	0.18166	0.2025	0.21192	0.20005	0.20762	0.23797	0.1896	0.36213	0.22933	0.22661	0.23247	0.22964
540	0.14156	0.145	0.14342	0.14248	0.14439	0.14497	0.1485	0.14385	0.1446	0.1515	0.14953	0.14556	0.15331	0.15837	0.16528	0.15895	0.15575	0.16082	0.15037	0.15316	0.16427	0.16787	0.17504	0.15249	0.1544	0.15417	0.19136	0.19123	0.19411	0.54962	0.19685	0.243	0.16824	0.15867	0.17317	0.16208	0.16468	0.18643	0.20998	0.22066	0.2072	0.21581	0.25168	0.19554	0.41362	0.2411	0.23773	0.24472	0.24133
541	0.14441	0.14798	0.14636	0.14535	0.14731	0.14795	0.15158	0.14679	0.14749	0.15472	0.15271	0.14849	0.15662	0.16187	0.16909	0.16258	0.15918	0.16453	0.15363	0.15648	0.1682	0.17194	0.17949	0.15581	0.15781	0.15752	0.1973	0.19726	0.20044	0.67834	0.2034	0.25749	0.17228	0.16226	0.17745	0.16584	0.1685	0.19151	0.21844	0.23068	0.21524	0.2252	0.2685	0.20205	0.4831	0.25525	0.25089	0.25942	0.25533
542	0.14733	0.15104	0.14938	0.1483	0.15029	0.15102	0.15476	0.1498	0.15045	0.15805	0.156	0.15148	0.16005	0.16551	0.17308	0.16637	0.16274	0.1684	0.15699	0.15992	0.17233	0.17622	0.18421	0.15925	0.16135	0.16099	0.20379	0.20385	0.2074	0.81525	0.21065	0.27533	0.17653	0.16601	0.18197	0.16977	0.1725	0.19697	0.22814	0.24237	0.22442	0.23615	0.28957	0.20923	0.57315	0.27269	0.26683	0.27749	0.27245
543	0.15033	0.15419	0.15248	0.15132	0.15337	0.15418	0.15803	0.15291	0.15348	0.16149	0.1594	0.15456	0.16361	0.16931	0.17727	0.17034	0.16645	0.17245	0.16048	0.16349	0.17668	0.18074	0.18924	0.16282	0.16504	0.16459	0.21093	0.2111	0.21511	0.91117	0.21878	0.29781	0.18102	0.16992	0.18677	0.1739	0.1767	0.20286	0.23948	0.25625	0.23508	0.24915	0.31648	0.21726	0.67853	0.29469	0.2866	0.3002	0.2939
544	0.15341	0.15744	0.15568	0.15443	0.15653	0.15743	0.16141	0.1561	0.15661	0.16507	0.16293	0.15772	0.16731	0.17328	0.18169	0.17449	0.17031	0.17671	0.16411	0.16721	0.18126	0.18553	0.19462	0.16654	0.16888	0.16835	0.21887	0.21915	0.22377	0.93701	0.22802	0.32673	0.18577	0.17403	0.1919	0.17824	0.18114	0.20929	0.253	0.27304	0.2477	0.26493	0.35133	0.22633	0.77978	0.32306	0.31176	0.3294	0.32138
545	0.15658	0.1608	0.15897	0.15763	0.15978	0.1608	0.16492	0.15939	0.15982	0.16878	0.1666	0.16098	0.17118	0.17744	0.18636	0.17887	0.17436	0.1812	0.16788	0.17109	0.18613	0.19064	0.20042	0.17042	0.1729	0.17227	0.22778	0.22821	0.23359	0.91175	0.23869	0.36453	0.19084	0.17835	0.1974	0.18283	0.18584	0.21635	0.26945	0.29377	0.26296	0.28446	0.39656	0.23672	0.8489	0.36029	0.34458	0.3677	0.35732
546	0.15985	0.16427	0.16238	0.16093	0.16315	0.16428	0.16855	0.1628	0.16313	0.17266	0.17042	0.16435	0.17522	0.18182	0.19132	0.18349	0.1786	0.18596	0.17182	0.17515	0.19131	0.19611	0.20671	0.17448	0.17712	0.17637	0.23791	0.23851	0.24489	0.86356	0.25125	0.41435	0.19628	0.18292	0.20335	0.1877	0.19084	0.2242	0.28992	0.31984	0.28183	0.30911	0.45451	0.24881	0.87159	0.40964	0.38829	0.41852	0.40493
547	0.16322	0.16786	0.16591	0.16434	0.16662	0.16789	0.17233	0.16632	0.16655	0.1767	0.17441	0.16782	0.17946	0.18645	0.19662	0.1884	0.18307	0.19103	0.17595	0.17942	0.19686	0.202	0.21358	0.17874	0.18156	0.18068	0.2496	0.25039	0.25807	0.80574	0.26634	0.47972	0.20215	0.18777	0.20983	0.1929	0.1962	0.23305	0.31596	0.35316	0.30571	0.34074	0.52624	0.26309	0.85639	0.47489	0.44723	0.4858	0.46803
548	0.16671	0.1716	0.16958	0.16787	0.17022	0.17164	0.17627	0.16997	0.17009	0.18095	0.17859	0.17142	0.18394	0.19136	0.20232	0.19363	0.1878	0.19645	0.18029	0.18391	0.20283	0.20839	0.22115	0.18323	0.18626	0.18523	0.26327	0.26431	0.27372	0.74389	0.28492	0.56306	0.20854	0.19295	0.21697	0.19847	0.20198	0.24315	0.34974	0.39617	0.33661	0.3818	0.60934	0.28027	0.81937	0.55884	0.52618	0.57224	0.54955
549	0.17033	0.17549	0.17339	0.17152	0.17396	0.17555	0.18039	0.17377	0.17375	0.18541	0.18299	0.17515	0.18867	0.19659	0.20849	0.19924	0.19283	0.20229	0.18487	0.18866	0.2093	0.21536	0.2296	0.18797	0.19125	0.19005	0.27954	0.2809	0.29261	0.68081	0.30838	0.66175	0.21555	0.1985	0.22492	0.2045	0.20826	0.25488	0.39423	0.45162	0.37734	0.43528	0.69516	0.30135	0.77144	0.65923	0.62698	0.67466	0.64757
550	0.17408	0.17955	0.17736	0.17532	0.17785	0.17963	0.1847	0.17772	0.17755	0.19012	0.18763	0.17902	0.19369	0.20221	0.21521	0.2053	0.19819	0.20862	0.18971	0.1937	0.21636	0.22306	0.23911	0.19301	0.19656	0.19517	0.29922	0.30104	0.31582	0.61773	0.33877	0.76185	0.22332	0.2045	0.23387	0.21105	0.21514	0.26873	0.45316	0.52175	0.43162	0.50403	0.76834	0.32769	0.71843	0.76195	0.74041	0.77705	0.74901
551	0.17799	0.1838	0.18151	0.17928	0.18191	0.1839	0.18923	0.18185	0.18151	0.19511	0.19254	0.18305	0.19906	0.20827	0.22261	0.21187	0.20395	0.21554	0.19485	0.19909	0.22411	0.23162	0.24997	0.19838	0.20227	0.20064	0.32347	0.32598	0.34485	0.55525	0.37909	0.83847	0.23204	0.21103	0.24409	0.21825	0.22277	0.28536	0.53	0.60598	0.50353	0.58869	0.81354	0.36118	0.66347	0.84088	0.83924	0.85221	0.82905
552	0.18206	0.18826	0.18586	0.18341	0.18615	0.18838	0.19401	0.18617	0.18563	0.20041	0.19775	0.18726	0.20482	0.21486	0.23084	0.21907	0.21016	0.22316	0.20034	0.20487	0.23271	0.24125	0.26256	0.20414	0.20842	0.20653	0.35378	0.35745	0.38164	0.49371	0.43333	0.87239	0.24195	0.21821	0.25596	0.22622	0.23131	0.30569	0.62475	0.69681	0.595	0.68342	0.82543	0.40426	0.60828	0.87562	0.89278	0.88159	0.8671
553	0.18632	0.19296	0.19044	0.18773	0.19059	0.19309	0.19907	0.1907	0.18994	0.20609	0.20333	0.19167	0.21106	0.22209	0.2401	0.22701	0.21692	0.23165	0.20622	0.21111	0.24235	0.25223	0.27738	0.21035	0.21511	0.21289	0.39213	0.39778	0.42862	0.43338	0.50588	0.86524	0.25336	0.22617	0.26993	0.23515	0.241	0.33083	0.72767	0.77761	0.69982	0.77217	0.80996	0.45977	0.55371	0.86797	0.89487	0.86974	0.86312
554	0.19079	0.19791	0.19526	0.19227	0.19527	0.19807	0.20444	0.19547	0.19445	0.21219	0.20931	0.19628	0.21785	0.23009	0.25067	0.23587	0.22433	0.2412	0.21258	0.2179	0.25327	0.26493	0.29512	0.2171	0.22242	0.21981	0.44082	0.44993	0.48834	0.37464	0.59875	0.83194	0.26666	0.23509	0.28663	0.24526	0.25216	0.36204	0.81571	0.82918	0.79738	0.83326	0.77682	0.53007	0.5001	0.83375	0.86325	0.83321	0.83168
555	0.19548	0.20317	0.20036	0.19704	0.2002	0.20336	0.21018	0.20051	0.19918	0.21879	0.21578	0.20114	0.22531	0.23906	0.26289	0.24586	0.23253	0.25207	0.21947	0.22533	0.26579	0.27983	0.31668	0.22447	0.23049	0.22742	0.50202	0.5169	0.56224	0.31815	0.7051	0.78508	0.28235	0.24524	0.30679	0.25685	0.26516	0.40042	0.86442	0.84331	0.85974	0.8545	0.73339	0.61472	0.44759	0.78597	0.81546	0.78431	0.78583
556	0.20043	0.20876	0.20577	0.20208	0.20541	0.20898	0.21633	0.20584	0.20417	0.22598	0.2228	0.20626	0.23359	0.24923	0.27728	0.25725	0.24168	0.26458	0.22701	0.23355	0.28035	0.2976	0.34329	0.23259	0.23948	0.23585	0.57626	0.59979	0.64785	0.26501	0.80292	0.73136	0.301	0.25691	0.33128	0.27031	0.28052	0.44642	0.86831	0.82664	0.87451	0.84103	0.68414	0.70614	0.39626	0.73139	0.76	0.72927	0.73264
557	0.20566	0.21474	0.21155	0.20742	0.21096	0.21499	0.22297	0.21151	0.20945	0.23386	0.2305	0.21168	0.24288	0.26093	0.2945	0.27039	0.25201	0.27913	0.23532	0.24271	0.29754	0.31916	0.37641	0.24163	0.24959	0.24529	0.65939	0.69333	0.73475	0.21684	0.86384	0.67439	0.32325	0.27054	0.361	0.28609	0.29886	0.49923	0.84063	0.79076	0.85246	0.80569	0.6317	0.78697	0.34633	0.67361	0.70106	0.67145	0.6759
558	0.21122	0.22115	0.21774	0.2131	0.21687	0.22145	0.23017	0.21757	0.21504	0.24258	0.23899	0.21743	0.25346	0.27462	0.31543	0.28573	0.26378	0.29625	0.24455	0.25305	0.31815	0.34567	0.41758	0.25178	0.2611	0.25597	0.73936	0.7812	0.80451	0.17547	0.87685	0.61614	0.34984	0.28668	0.39683	0.3048	0.32096	0.55613	0.79598	0.74413	0.81014	0.75833	0.57761	0.83723	0.29828	0.61458	0.64087	0.61264	0.61769
559	0.21715	0.22809	0.2244	0.21916	0.22322	0.22842	0.23803	0.22407	0.22099	0.25232	0.24845	0.22356	0.26567	0.29087	0.34122	0.30387	0.27738	0.31659	0.25491	0.26484	0.34323	0.37859	0.46793	0.26332	0.27434	0.26823	0.79863	0.84075	0.84087	0.14224	0.85385	0.55762	0.38153	0.30607	0.4394	0.32721	0.34777	0.61234	0.74271	0.69171	0.75768	0.7046	0.52279	0.84904	0.25301	0.55532	0.58055	0.55377	0.55912
560	0.22351	0.23562	0.23162	0.22567	0.23005	0.236	0.24668	0.23106	0.22736	0.26331	0.25909	0.23012	0.27998	0.31049	0.37322	0.3256	0.29327	0.34099	0.26668	0.27847	0.37412	0.41957	0.52716	0.2766	0.28979	0.28249	0.82495	0.85968	0.84151	0.11732	0.81116	0.49942	0.41907	0.32973	0.48878	0.35428	0.38044	0.66152	0.68516	0.63638	0.70018	0.64766	0.46785	0.82992	0.21178	0.4964	0.52068	0.49534	0.50081
561	0.23034	0.24385	0.23948	0.23269	0.23747	0.24428	0.25629	0.23864	0.23419	0.27584	0.2712	0.23718	0.29706	0.33452	0.41292	0.35192	0.3121	0.3705	0.28019	0.29445	0.41248	0.4701	0.59248	0.2921	0.30807	0.29934	0.8192	0.84389	0.81589	0.099654	0.75862	0.44193	0.46292	0.35897	0.54382	0.38717	0.42018	0.69752	0.62571	0.57977	0.6404	0.58929	0.4133	0.79195	0.17595	0.43825	0.46161	0.43772	0.44319
562	0.23774	0.25291	0.24809	0.24031	0.24555	0.25339	0.26704	0.24689	0.24155	0.29032	0.28517	0.24479	0.3178	0.3643	0.46167	0.38414	0.33472	0.40634	0.29592	0.31347	0.4601	0.53082	0.65773	0.31047	0.33001	0.31957	0.79094	0.80692	0.77482	0.087623	0.70115	0.38554	0.51285	0.39549	0.60136	0.42716	0.46802	0.7166	0.56564	0.52284	0.5798	0.53049	0.35972	0.74371	0.14655	0.3813	0.40367	0.3813	0.38668
563	0.24579	0.26297	0.25761	0.24863	0.25443	0.2635	0.27921	0.25594	0.24955	0.30727	0.30148	0.25305	0.34341	0.40147	0.52	0.42375	0.36221	0.44973	0.3145	0.33645	0.51832	0.60005	0.714	0.33257	0.35671	0.34429	0.74944	0.75875	0.72532	0.079703	0.64145	0.33087	0.56732	0.44128	0.65588	0.47538	0.52413	0.71853	0.50567	0.4662	0.51921	0.47188	0.30792	0.69003	0.12379	0.32621	0.34736	0.32667	0.33189
564	0.25461	0.27424	0.26822	0.25777	0.26427	0.27482	0.29314	0.26592	0.25826	0.32739	0.32084	0.26207	0.37553	0.44781	0.58631	0.47228	0.39594	0.50153	0.33679	0.36465	0.58668	0.67186	0.75259	0.35958	0.3896	0.37494	0.70063	0.70485	0.67144	0.074709	0.58095	0.27887	0.62278	0.49814	0.70037	0.53215	0.58672	0.70586	0.4463	0.41034	0.45914	0.41399	0.25909	0.63368	0.10701	0.274	0.29351	0.27482	0.2798
565	0.26434	0.28698	0.28013	0.26789	0.27525	0.2876	0.30928	0.27701	0.26783	0.3516	0.34417	0.27197	0.41621	0.50458	0.65504	0.5305	0.43742	0.56126	0.36394	0.39967	0.66055	0.73546	0.76913	0.39306	0.4304	0.41338	0.64801	0.64821	0.61548	0.07179	0.52043	0.23096	0.67358	0.56638	0.72891	0.59573	0.65066	0.68214	0.38806	0.35583	0.40012	0.35746	0.21476	0.5762	0.095104	0.22617	0.24344	0.22718	0.2318
566	0.27516	0.30153	0.29365	0.2792	0.28764	0.30218	0.3282	0.28942	0.2784	0.38105	0.37268	0.28291	0.46767	0.57128	0.71657	0.59715	0.48796	0.62587	0.39743	0.44336	0.72983	0.77905	0.76453	0.43488	0.48085	0.46165	0.59365	0.59058	0.55878	0.070338	0.46042	0.18883	0.71323	0.64261	0.73889	0.66104	0.70764	0.65066	0.33166	0.30347	0.34282	0.30317	0.17653	0.51849	0.086931	0.18443	0.19883	0.18548	0.18958
567	0.28729	0.31834	0.30915	0.29193	0.30175	0.319	0.35066	0.30344	0.29017	0.41709	0.40797	0.29507	0.53139	0.64346	0.75985	0.66692	0.54774	0.68849	0.43913	0.49748	0.78107	0.79592	0.74345	0.48699	0.54189	0.52134	0.53872	0.53285	0.5021	0.069936	0.4014	0.15397	0.73662	0.71712	0.73161	0.71915	0.74824	0.61399	0.27818	0.25442	0.28826	0.25244	0.14555	0.46113	0.081525	0.15023	0.16139	0.15117	0.15464
568	0.30101	0.33796	0.32711	0.30643	0.31801	0.33859	0.37758	0.3194	0.30338	0.46107	0.45187	0.30868	0.60605	0.71146	0.77826	0.72971	0.61425	0.73937	0.49092	0.56245	0.80497	0.78766	0.71089	0.55043	0.612	0.59191	0.48391	0.4756	0.44595	0.070284	0.34403	0.12702	0.74203	0.77537	0.7106	0.7601	0.76658	0.57399	0.22916	0.2102	0.23791	0.20695	0.12199	0.40459	0.078151	0.12404	0.13203	0.1248	0.1276
569	0.31669	0.36111	0.34816	0.32309	0.33695	0.36165	0.41	0.33772	0.31832	0.51373	0.50607	0.32403	0.68461	0.76258	0.77253	0.77368	0.68069	0.76979	0.55389	0.63534	0.8014	0.76095	0.67082	0.62336	0.68488	0.6681	0.42971	0.41921	0.39078	0.071168	0.28934	0.1074	0.73115	0.80523	0.67969	0.77765	0.76268	0.53189	0.1864	0.17238	0.19359	0.16841	0.105	0.34948	0.076268	0.10514	0.11047	0.10569	0.1079
570	0.33478	0.38865	0.37306	0.34244	0.35924	0.389	0.44897	0.35894	0.33536	0.57409	0.57085	0.34145	0.75311	0.78774	0.74837	0.79179	0.73639	0.77668	0.62615	0.70729	0.77727	0.72246	0.62595	0.6982	0.74866	0.73803	0.37655	0.36416	0.33716	0.072435	0.23881	0.093751	0.70746	0.80488	0.64197	0.77236	0.74103	0.48855	0.1514	0.142	0.15692	0.13786	0.093246	0.29666	0.075484	0.092095	0.095387	0.092466	0.094195
571	0.35587	0.42152	0.40276	0.36514	0.38572	0.42156	0.49507	0.38367	0.35496	0.63806	0.64302	0.36133	0.79651	0.7859	0.71195	0.78482	0.77114	0.76279	0.70049	0.76489	0.74016	0.67691	0.57812	0.76169	0.79041	0.78713	0.32502	0.31112	0.28597	0.073976	0.19426	0.084599	0.67454	0.78095	0.59971	0.74916	0.707	0.44458	0.12468	0.11909	0.12862	0.11519	0.085402	0.24738	0.075504	0.083398	0.085232	0.083625	0.084993
572	0.38066	0.46064	0.43831	0.392	0.41732	0.46019	0.54775	0.41264	0.37766	0.69749	0.71341	0.38415	0.80803	0.76303	0.66782	0.75916	0.78075	0.73389	0.76353	0.79636	0.69535	0.6272	0.52853	0.80025	0.80362	0.80639	0.27601	0.26116	0.23847	0.07571	0.15735	0.078697	0.63526	0.7422	0.5545	0.71388	0.66491	0.40051	0.10545	0.1027	0.1081	0.099202	0.080399	0.20329	0.076117	0.077833	0.078635	0.077949	0.079052
573	0.41002	0.50647	0.48065	0.42392	0.45497	0.50534	0.60427	0.44657	0.40409	0.74235	0.76849	0.41041	0.79177	0.7262	0.61893	0.72143	0.76789	0.69515	0.80178	0.79869	0.64613	0.57518	0.478	0.80844	0.79091	0.79719	0.23079	0.21575	0.19626	0.077582	0.12885	0.075112	0.59175	0.69483	0.50745	0.67098	0.61776	0.35689	0.092226	0.09143	0.093925	0.088374	0.077435	0.16599	0.077162	0.074494	0.074567	0.074526	0.075436
574	0.44486	0.55834	0.53013	0.4618	0.49924	0.5564	0.65905	0.48601	0.43493	0.76517	0.79695	0.44059	0.75704	0.68076	0.5672	0.67636	0.73888	0.65024	0.80978	0.77761	0.59444	0.522	0.42715	0.79099	0.76003	0.7677	0.19087	0.17653	0.16084	0.079552	0.10817	0.07318	0.54551	0.6425	0.45939	0.62339	0.56754	0.31437	0.083446	0.083954	0.084464	0.081296	0.075936	0.13645	0.078524	0.072742	0.0723	0.072712	0.073481
575	0.48596	0.61356	0.58561	0.50617	0.54968	0.6108	0.70447	0.53096	0.47073	0.76478	0.79663	0.47503	0.71143	0.63013	0.51388	0.62694	0.6994	0.60158	0.79207	0.74121	0.54153	0.46841	0.37661	0.75643	0.71794	0.72581	0.15759	0.14473	0.13297	0.081593	0.093875	0.072428	0.49759	0.58746	0.41099	0.57304	0.51558	0.27378	0.077844	0.079217	0.078386	0.076892	0.075486	0.11451	0.080117	0.072122	0.071314	0.072046	0.072711
576	0.53349	0.66674	0.64332	0.55659	0.60392	0.66344	0.73358	0.5802	0.51167	0.74533	0.77362	0.51368	0.65958	0.57646	0.45984	0.57505	0.65346	0.55073	0.75729	0.69568	0.48814	0.41501	0.32714	0.71172	0.66925	0.67671	0.13154	0.1206	0.11236	0.083684	0.084338	0.072521	0.44878	0.53107	0.36292	0.52116	0.46279	0.23608	0.074495	0.076444	0.074704	0.07439	0.07579	0.099014	0.081879	0.072311	0.071243	0.0722	0.07279
577	0.58618	0.71054	0.69631	0.61064	0.65692	0.70723	0.74323	0.63058	0.55699	0.71257	0.73597	0.55572	0.60419	0.52113	0.40584	0.52189	0.60361	0.49872	0.71239	0.64481	0.43481	0.36241	0.27976	0.66114	0.61674	0.62349	0.11228	0.10326	0.097836	0.085813	0.078212	0.07322	0.39973	0.47425	0.31597	0.46862	0.40994	0.2023	0.072746	0.075078	0.072721	0.07324	0.076633	0.088499	0.083765	0.073079	0.071827	0.072944	0.073477
578	0.6404	0.73819	0.73606	0.66326	0.70147	0.73554	0.73459	0.67682	0.60443	0.67128	0.6897	0.59914	0.54696	0.46513	0.35268	0.46826	0.55153	0.44629	0.6617	0.59094	0.38207	0.31143	0.23577	0.60726	0.56217	0.56803	0.098687	0.091336	0.087987	0.087973	0.074495	0.07435	0.35115	0.4177	0.27115	0.41605	0.35779	0.17334	0.072133	0.074718	0.071942	0.073053	0.077862	0.081617	0.085744	0.07426	0.072878	0.074107	0.074597
579	0.68966	0.74648	0.75616	0.70712	0.73058	0.74497	0.71155	0.7125	0.64973	0.62468	0.63842	0.64044	0.48895	0.40923	0.30138	0.41478	0.4983	0.39406	0.60776	0.53549	0.33056	0.26321	0.19665	0.55164	0.50663	0.51152	0.089434	0.083413	0.081554	0.090157	0.072488	0.075789	0.3039	0.36215	0.22972	0.36413	0.30726	0.14966	0.072331	0.07508	0.072022	0.073553	0.079368	0.077337	0.087793	0.075736	0.074264	0.075571	0.076028
580	0.72629	0.73655	0.75519	0.73521	0.74052	0.73635	0.6783	0.73244	0.68718	0.57486	0.58432	0.67501	0.43099	0.35428	0.25327	0.36206	0.44468	0.34276	0.55212	0.47942	0.28123	0.21919	0.16368	0.4953	0.45087	0.45478	0.083367	0.078376	0.077577	0.092364	0.071697	0.07745	0.25911	0.30855	0.19303	0.31367	0.25961	0.13118	0.073108	0.07596	0.072717	0.074544	0.081072	0.074914	0.089897	0.077422	0.075888	0.077249	0.077681
581	0.74443	0.71207	0.73616	0.74376	0.7318	0.71314	0.63816	0.73467	0.71137	0.52322	0.52881	0.69836	0.37387	0.30136	0.20996	0.31095	0.39135	0.2933	0.49581	0.42347	0.2354	0.18094	0.13753	0.43897	0.39556	0.39852	0.079593	0.075391	0.075346	0.094593	0.071767	0.079266	0.21815	0.25821	0.16225	0.26579	0.21632	0.11737	0.074296	0.077209	0.073847	0.075884	0.082917	0.073808	0.092046	0.079257	0.077681	0.079079	0.07949
582	0.74273	0.67735	0.70411	0.73362	0.70813	0.67951	0.59348	0.72083	0.71929	0.47066	0.47279	0.70766	0.3186	0.25189	0.17302	0.26258	0.33908	0.24696	0.43952	0.36833	0.19466	0.14966	0.11793	0.38329	0.34145	0.34352	0.077476	0.073879	0.074372	0.096843	0.072453	0.081195	0.18244	0.21279	0.13785	0.22194	0.17898	0.10739	0.075778	0.078723	0.075287	0.077472	0.084865	0.073648	0.094234	0.081199	0.079595	0.081018	0.081413
583	0.72386	0.63579	0.66349	0.70857	0.67377	0.63886	0.54585	0.69442	0.71114	0.4179	0.41695	0.70254	0.26652	0.20758	0.14345	0.21845	0.2889	0.20529	0.38388	0.31494	0.16045	0.12565	0.10393	0.3291	0.28958	0.29087	0.076554	0.07342	0.074296	0.099115	0.073579	0.083205	0.15303	0.17398	0.11955	0.18368	0.14865	0.10044	0.077468	0.080425	0.076948	0.079236	0.086887	0.074163	0.096455	0.083218	0.081594	0.083036	0.083416
584	0.6923	0.58977	0.61743	0.67301	0.63226	0.59362	0.49641	0.65908	0.68949	0.36568	0.36202	0.68468	0.21935	0.17009	0.12124	0.18015	0.24217	0.16977	0.32972	0.26454	0.13352	0.10823	0.094321	0.27752	0.24138	0.24201	0.076493	0.073714	0.074865	0.10141	0.075017	0.085275	0.13022	0.14293	0.10646	0.15223	0.12555	0.095811	0.079305	0.082263	0.078765	0.081126	0.088966	0.07516	0.09871	0.085293	0.083656	0.085112	0.085479
585	0.65223	0.54094	0.568	0.6305	0.5861	0.54544	0.44601	0.61772	0.65776	0.31488	0.30894	0.65683	0.17888	0.14041	0.10546	0.14892	0.2005	0.14136	0.27813	0.21873	0.11359	0.096161	0.087981	0.23009	0.19853	0.19868	0.077054	0.074548	0.075893	0.10374	0.076676	0.087388	0.11348	0.11971	0.097466	0.12799	0.10892	0.092929	0.081247	0.084198	0.080692	0.083105	0.091087	0.0765	0.101	0.08741	0.085765	0.087231	0.087587
586	0.60665	0.49041	0.51653	0.58348	0.53695	0.49547	0.39539	0.57239	0.61897	0.26672	0.25901	0.62166	0.14637	0.11836	0.094693	0.12502	0.1654	0.11998	0.23065	0.17923	0.099533	0.088095	0.084028	0.18856	0.16263	0.16246	0.078065	0.075769	0.077253	0.10609	0.078491	0.089537	0.10172	0.10327	0.091542	0.11034	0.097463	0.091364	0.083265	0.086205	0.082698	0.085149	0.093244	0.078086	0.10331	0.08956	0.087909	0.089384	0.08973
587	0.55759	0.43904	0.46402	0.53364	0.48603	0.44456	0.34537	0.5245	0.5754	0.22268	0.21387	0.58136	0.12196	0.10286	0.08763	0.10776	0.13766	0.10474	0.18901	0.14727	0.090008	0.082937	0.081803	0.15436	0.13446	0.13414	0.079403	0.077268	0.07885	0.10847	0.080418	0.091715	0.093798	0.092126	0.08787	0.098071	0.08987	0.090783	0.085337	0.088266	0.084761	0.087241	0.095432	0.079848	0.10567	0.091738	0.090081	0.091565	0.091901
588	0.5064	0.38762	0.41125	0.48214	0.43426	0.39349	0.29695	0.47508	0.52867	0.18437	0.17521	0.53756	0.10469	0.092416	0.083224	0.095851	0.11707	0.094318	0.15468	0.1231	0.083795	0.079864	0.080821	0.12805	0.11376	0.1134	0.080976	0.078965	0.080616	0.11089	0.082425	0.093918	0.0887	0.084846	0.085836	0.089872	0.085073	0.090932	0.08745	0.09037	0.086867	0.089371	0.097646	0.081734	0.10806	0.09394	0.092279	0.093772	0.094097
589	0.4541	0.337	0.35902	0.4299	0.38249	0.34308	0.25146	0.42493	0.47996	0.15299	0.14417	0.49147	0.093007	0.085633	0.080709	0.087942	0.10257	0.087469	0.12825	0.10587	0.079961	0.078285	0.080734	0.10904	0.09932	0.098982	0.082719	0.080804	0.082504	0.11335	0.084488	0.096146	0.08565	0.080304	0.084985	0.084625	0.082273	0.091623	0.089595	0.092509	0.089006	0.09153	0.099887	0.08371	0.11049	0.096166	0.094499	0.096002	0.096318
590	0.40155	0.28827	0.3083	0.37776	0.33165	0.29434	0.2104	0.3748	0.4302	0.12888	0.12088	0.444	0.085377	0.081445	0.079543	0.082909	0.09276	0.083187	0.10914	0.094121	0.077835	0.077777	0.081288	0.095963	0.089641	0.089348	0.084587	0.082745	0.08448	0.11586	0.086593	0.098396	0.084077	0.077704	0.084986	0.081492	0.0809	0.092713	0.091766	0.094679	0.091171	0.093715	0.10216	0.085752	0.11296	0.098414	0.096742	0.098256	0.098561
591	0.3496	0.24279	0.26037	0.32667	0.2829	0.2486	0.17523	0.32555	0.38024	0.1114	0.10437	0.39594	0.080601	0.079099	0.079342	0.079932	0.086368	0.080744	0.095978	0.086395	0.076936	0.078038	0.082303	0.087283	0.083384	0.083135	0.086546	0.084761	0.086522	0.11841	0.088731	0.10067	0.083569	0.076485	0.085601	0.079875	0.080549	0.094099	0.093962	0.096878	0.09336	0.095924	0.10445	0.087843	0.11547	0.10069	0.099007	0.10053	0.10083
592	0.29934	0.20216	0.2168	0.27783	0.2377	0.20743	0.14689	0.27827	0.331	0.099296	0.093164	0.34811	0.077845	0.078067	0.079829	0.078429	0.082423	0.079623	0.087239	0.081529	0.076919	0.078849	0.083651	0.081742	0.079558	0.07935	0.088574	0.086832	0.088614	0.12101	0.090894	0.10297	0.083826	0.076254	0.08666	0.079346	0.080927	0.095706	0.09618	0.099105	0.095571	0.098157	0.10678	0.089972	0.11804	0.10298	0.1013	0.10284	0.10312
593	0.25216	0.16781	0.1792	0.23275	0.19767	0.1723	0.12538	0.23438	0.28363	0.091222	0.085827	0.3015	0.076527	0.07797	0.080806	0.077985	0.080232	0.07945	0.081662	0.078698	0.077535	0.080054	0.085236	0.078433	0.077466	0.077292	0.090655	0.088947	0.090745	0.12367	0.093081	0.1053	0.084632	0.076724	0.088037	0.079596	0.081825	0.097478	0.09842	0.10136	0.097803	0.10041	0.10913	0.092133	0.12066	0.10531	0.10361	0.10517	0.10544
594	0.20969	0.14056	0.14871	0.19307	0.16419	0.14413	0.10992	0.19543	0.23954	0.086063	0.081239	0.25732	0.076229	0.078535	0.08213	0.078295	0.079293	0.079952	0.078323	0.077314	0.0786	0.08154	0.086993	0.076708	0.076609	0.076461	0.092779	0.091095	0.092909	0.12639	0.095288	0.10766	0.08583	0.077692	0.089644	0.0804	0.083092	0.099374	0.10068	0.10365	0.10006	0.10269	0.11152	0.094321	0.12335	0.10766	0.10596	0.10753	0.10779
595	0.1735	0.12025	0.12557	0.16016	0.13794	0.12293	0.099287	0.16279	0.20031	0.082992	0.0786	0.21702	0.076653	0.079569	0.083701	0.079142	0.079249	0.080935	0.076575	0.076962	0.079987	0.083226	0.088875	0.076114	0.076631	0.076504	0.094939	0.093273	0.095102	0.12919	0.097515	0.11005	0.087309	0.079013	0.091418	0.081599	0.084622	0.10137	0.10297	0.10596	0.10234	0.105	0.11395	0.096533	0.12609	0.11005	0.10833	0.10993	0.11017
596	0.14459	0.10589	0.109	0.1346	0.11859	0.10782	0.092254	0.13713	0.16731	0.081416	0.077351	0.18204	0.077589	0.080936	0.085448	0.080373	0.079843	0.082262	0.075963	0.077343	0.081604	0.085055	0.090848	0.076323	0.077279	0.077168	0.097129	0.095477	0.09732	0.13206	0.099764	0.11248	0.08899	0.080585	0.093314	0.083081	0.08634	0.10344	0.10529	0.10831	0.10464	0.10734	0.11642	0.09877	0.12892	0.11247	0.11074	0.11236	0.11259
597	0.12293	0.096169	0.097663	0.11593	0.10504	0.097515	0.08783	0.11816	0.14126	0.080913	0.077095	0.15344	0.078888	0.082539	0.087321	0.081878	0.080891	0.083835	0.076162	0.078245	0.083386	0.08699	0.09289	0.077105	0.078372	0.078272	0.099349	0.097706	0.099565	0.13502	0.10203	0.11495	0.090819	0.082335	0.095301	0.084765	0.088194	0.10557	0.10763	0.1107	0.10697	0.10971	0.11893	0.10103	0.13182	0.11493	0.11319	0.11483	0.11505
598	0.10761	0.089846	0.090208	0.10297	0.095947	0.090763	0.085284	0.10484	0.12191	0.081176	0.077543	0.13146	0.080444	0.08431	0.089286	0.083578	0.082263	0.085584	0.076935	0.079517	0.085286	0.089	0.094986	0.078293	0.079781	0.079688	0.1016	0.09996	0.10184	0.13807	0.10433	0.11746	0.092755	0.084212	0.09736	0.086593	0.090147	0.10776	0.11001	0.11312	0.10933	0.11211	0.12149	0.10332	0.13481	0.11743	0.11568	0.11735	0.11755
599	0.097238	0.08596	0.08553	0.094327	0.090093	0.086565	0.084086	0.095869	0.10829	0.081986	0.078492	0.11551	0.082183	0.086201	0.091319	0.085418	0.083866	0.087459	0.078116	0.081052	0.087272	0.091068	0.097124	0.079769	0.081414	0.081326	0.10387	0.10224	0.10413	0.14123	0.10665	0.12002	0.094773	0.08618	0.099473	0.088527	0.092172	0.10999	0.11242	0.11559	0.11173	0.11455	0.12411	0.10563	0.1379	0.11998	0.11822	0.11992	0.12009
600	0.090484	0.083817	0.082828	0.088809	0.086554	0.084197	0.083855	0.090083	0.099109	0.083185	0.079796	0.10448	0.08405	0.088178	0.093403	0.087359	0.085635	0.089427	0.079587	0.082773	0.089322	0.09318	0.099299	0.08145	0.083207	0.083121	0.10618	0.10455	0.10646	0.14451	0.109	0.12264	0.096853	0.088215	0.10163	0.090539	0.094253	0.11227	0.11487	0.1181	0.11416	0.11703	0.12678	0.10798	0.14109	0.12259	0.1208	0.12254	0.12269
601	0.086322	0.082924	0.081541	0.085522	0.084671	0.083141	0.084316	0.086586	0.093181	0.084665	0.081354	0.097162	0.08601	0.090219	0.095528	0.089375	0.087523	0.091464	0.081265	0.084628	0.09142	0.095329	0.10151	0.083276	0.085114	0.085029	0.10852	0.10688	0.10882	0.14792	0.11138	0.12531	0.098983	0.0903	0.10383	0.092609	0.096378	0.11459	0.11736	0.12066	0.11663	0.11956	0.12952	0.11035	0.14441	0.12525	0.12344	0.12521	0.12534
602	0.084003	0.082921	0.081263	0.083824	0.083968	0.083022	0.08527	0.084726	0.089595	0.086344	0.083092	0.092564	0.088037	0.092307	0.097686	0.091448	0.089498	0.093555	0.08309	0.086579	0.093558	0.097508	0.10374	0.085207	0.087104	0.087018	0.11089	0.10925	0.11121	0.15148	0.1138	0.12804	0.10115	0.092423	0.10607	0.094725	0.098539	0.11695	0.1199	0.12328	0.11915	0.12214	0.13233	0.11276	0.14786	0.12797	0.12615	0.12796	0.12806
603	0.082988	0.083548	0.081695	0.083248	0.084099	0.083566	0.086574	0.084031	0.087674	0.088166	0.084958	0.089911	0.090113	0.094433	0.099873	0.093564	0.091538	0.095687	0.08502	0.088599	0.095727	0.099715	0.10601	0.087213	0.089154	0.089065	0.11329	0.11165	0.11364	0.15521	0.11625	0.13085	0.10336	0.094577	0.10834	0.096878	0.10073	0.11936	0.12248	0.12595	0.12172	0.12477	0.13521	0.11521	0.15147	0.13076	0.12891	0.13077	0.13084
604	0.082897	0.084621	0.082632	0.08347	0.084821	0.084579	0.088128	0.084163	0.086936	0.090092	0.086916	0.088646	0.092226	0.09659	0.10209	0.095715	0.093627	0.097854	0.087025	0.09067	0.097925	0.10195	0.10831	0.089274	0.091249	0.091156	0.11574	0.11409	0.11611	0.15913	0.11875	0.13373	0.10561	0.096758	0.11064	0.099064	0.10295	0.12181	0.12513	0.12869	0.12433	0.12746	0.13818	0.11771	0.15524	0.13362	0.13176	0.13366	0.1337
605	0.083465	0.086012	0.083927	0.084259	0.085962	0.085928	0.089861	0.084886	0.087041	0.092095	0.08894	0.088373	0.09437	0.098773	0.10433	0.097898	0.095756	0.10005	0.089085	0.092781	0.10015	0.10421	0.11064	0.091377	0.093381	0.093282	0.11822	0.11657	0.11862	0.16327	0.12129	0.1367	0.10788	0.098963	0.11298	0.10128	0.1052	0.1243	0.12783	0.1315	0.12701	0.13022	0.14124	0.12024	0.1592	0.13657	0.13468	0.13664	0.13664
606	0.0845	0.08763	0.085477	0.08545	0.087403	0.087516	0.091724	0.086029	0.087747	0.094156	0.091015	0.088808	0.09654	0.10098	0.10659	0.10011	0.097917	0.10228	0.091187	0.094924	0.1024	0.1065	0.113	0.093513	0.095542	0.095436	0.12076	0.1191	0.12118	0.16767	0.12388	0.13976	0.11019	0.10119	0.11536	0.10352	0.10748	0.12685	0.1306	0.13439	0.12975	0.13305	0.14441	0.12283	0.16338	0.13962	0.13769	0.13971	0.13967
607	0.085877	0.089416	0.087215	0.086935	0.089063	0.089281	0.093686	0.087481	0.088892	0.096264	0.09313	0.089761	0.098732	0.10321	0.10889	0.10234	0.10011	0.10453	0.093324	0.097095	0.10468	0.10881	0.1154	0.095677	0.09773	0.097616	0.12334	0.12167	0.1238	0.17236	0.12652	0.14292	0.11253	0.10344	0.11777	0.10579	0.10979	0.12944	0.13344	0.13736	0.13256	0.13595	0.14769	0.12547	0.16781	0.14276	0.1408	0.14289	0.1428
608	0.087481	0.091317	0.08908	0.088618	0.090871	0.091167	0.095717	0.08914	0.090332	0.098408	0.095275	0.091064	0.10095	0.10547	0.11121	0.10461	0.10233	0.10682	0.095488	0.099291	0.10698	0.11116	0.11783	0.097865	0.099941	0.099818	0.12598	0.1243	0.12647	0.17741	0.12923	0.1462	0.11491	0.10572	0.12022	0.10809	0.11213	0.13209	0.13636	0.14043	0.13544	0.13895	0.1511	0.12817	0.17252	0.14602	0.14402	0.14618	0.14604
609	0.089245	0.093299	0.091034	0.090438	0.092784	0.093138	0.097801	0.090944	0.091976	0.10058	0.097447	0.09261	0.10318	0.10775	0.11356	0.1069	0.10457	0.10913	0.097676	0.10151	0.10931	0.11353	0.12031	0.10008	0.10218	0.10204	0.12867	0.12698	0.1292	0.18287	0.132	0.14961	0.11732	0.10803	0.12272	0.11042	0.1145	0.1348	0.13938	0.1436	0.13841	0.14204	0.15465	0.13094	0.17756	0.1494	0.14737	0.14961	0.14941
610	0.091127	0.095346	0.093057	0.092362	0.094777	0.095177	0.099929	0.092859	0.093773	0.10279	0.099642	0.094338	0.10544	0.11006	0.11594	0.10922	0.10684	0.11147	0.099887	0.10375	0.11168	0.11595	0.12282	0.10231	0.10443	0.10429	0.13143	0.12974	0.13201	0.18883	0.13485	0.15317	0.11977	0.11036	0.12526	0.11278	0.1169	0.13758	0.14249	0.14689	0.14147	0.14523	0.15837	0.13378	0.183	0.15292	0.15085	0.15318	0.15292
611	0.093102	0.097444	0.095136	0.094368	0.096834	0.09727	0.10209	0.09486	0.09569	0.10502	0.10186	0.096206	0.10773	0.11239	0.11836	0.11157	0.10914	0.11385	0.10212	0.10602	0.11408	0.1184	0.12539	0.10457	0.10672	0.10656	0.13427	0.13256	0.13489	0.19541	0.13777	0.15688	0.12227	0.11272	0.12785	0.11518	0.11934	0.14042	0.1457	0.15031	0.14464	0.14855	0.16227	0.1367	0.18889	0.1566	0.15448	0.15692	0.15658
612	0.095144	0.099584	0.097257	0.096434	0.098939	0.099406	0.10429	0.096925	0.097692	0.10728	0.10411	0.098175	0.11004	0.11476	0.12082	0.11395	0.11147	0.11626	0.10438	0.10831	0.11651	0.12089	0.12801	0.10685	0.10903	0.10886	0.13718	0.13546	0.13785	0.20277	0.14078	0.16078	0.12481	0.11511	0.1305	0.11761	0.12183	0.14334	0.14904	0.15387	0.14792	0.152	0.16638	0.13971	0.19534	0.16047	0.15829	0.16084	0.16042
613	0.097236	0.10176	0.099412	0.098544	0.10108	0.10158	0.10652	0.099037	0.099757	0.10956	0.10637	0.10022	0.11237	0.11716	0.12332	0.11637	0.11382	0.11871	0.10666	0.11063	0.11899	0.12343	0.13068	0.10916	0.11137	0.11118	0.14017	0.13844	0.1409	0.21112	0.14389	0.16489	0.1274	0.11754	0.1332	0.12008	0.12435	0.14634	0.15252	0.1576	0.15133	0.1556	0.17074	0.14281	0.20246	0.16453	0.16229	0.16498	0.16446
614	0.099367	0.10396	0.1016	0.10069	0.10326	0.10378	0.10878	0.10119	0.10187	0.11188	0.10867	0.10232	0.11474	0.1196	0.12587	0.11882	0.11622	0.1212	0.10897	0.11298	0.12151	0.12602	0.13342	0.11149	0.11374	0.11353	0.14326	0.14152	0.14406	0.22077	0.1471	0.16924	0.13005	0.12001	0.13597	0.1226	0.12693	0.14943	0.15615	0.16151	0.15489	0.15936	0.17538	0.14603	0.21041	0.16883	0.16651	0.16936	0.16872
615	0.10153	0.10619	0.10381	0.10287	0.10547	0.10601	0.11107	0.10338	0.10403	0.11423	0.11099	0.10446	0.11714	0.12208	0.12846	0.12132	0.11864	0.12373	0.11131	0.11536	0.12407	0.12866	0.13622	0.11386	0.11614	0.11592	0.14646	0.1447	0.14733	0.23217	0.15044	0.17387	0.13275	0.12253	0.1388	0.12516	0.12956	0.15262	0.15995	0.16564	0.15861	0.16332	0.18036	0.14936	0.21942	0.1734	0.17099	0.17402	0.17326
616	0.10373	0.10845	0.10605	0.10508	0.1077	0.10827	0.11339	0.10559	0.10622	0.1166	0.11333	0.10665	0.11958	0.12459	0.13111	0.12387	0.12111	0.12632	0.11367	0.11777	0.12669	0.13136	0.13909	0.11626	0.11859	0.11834	0.14977	0.148	0.15072	0.24599	0.1539	0.17882	0.13552	0.12509	0.14171	0.12777	0.13224	0.15592	0.16394	0.17001	0.16251	0.16751	0.18575	0.15282	0.22979	0.17829	0.17577	0.17901	0.1781
617	0.10595	0.11074	0.10831	0.10732	0.10996	0.11056	0.11573	0.10784	0.10844	0.11902	0.11572	0.10887	0.12206	0.12716	0.13381	0.12646	0.12362	0.12896	0.11607	0.12022	0.12937	0.13412	0.14205	0.1187	0.12107	0.12079	0.15321	0.15142	0.15426	0.26324	0.15752	0.18416	0.13836	0.12769	0.1447	0.13044	0.13498	0.15933	0.16817	0.17466	0.16662	0.17195	0.19163	0.15643	0.24196	0.18356	0.1809	0.18439	0.18331
618	0.1082	0.11306	0.1106	0.10958	0.11225	0.11287	0.11812	0.11012	0.1107	0.12147	0.11813	0.11113	0.12458	0.12978	0.13658	0.12911	0.12618	0.13165	0.11851	0.12271	0.1321	0.13695	0.14509	0.12117	0.12359	0.12329	0.15679	0.15499	0.15795	0.2855	0.1613	0.18997	0.14127	0.13036	0.14779	0.13317	0.1378	0.16288	0.17266	0.17966	0.17099	0.17669	0.19813	0.16022	0.25657	0.18928	0.18644	0.19024	0.18896
619	0.11047	0.11541	0.11292	0.11187	0.11457	0.11522	0.12053	0.11242	0.11298	0.12396	0.12058	0.11342	0.12714	0.13245	0.13941	0.13181	0.12878	0.13441	0.12099	0.12525	0.1349	0.13985	0.14822	0.12369	0.12616	0.12584	0.16053	0.15872	0.16182	0.31523	0.16527	0.19633	0.14426	0.13308	0.15097	0.13597	0.14068	0.16657	0.17746	0.18505	0.17564	0.1818	0.20539	0.16419	0.27459	0.19555	0.19248	0.19666	0.19515
620	0.11278	0.11779	0.11527	0.11419	0.11692	0.1176	0.12299	0.11476	0.11529	0.12649	0.12308	0.11573	0.12976	0.13517	0.14232	0.13458	0.13144	0.13724	0.12351	0.12783	0.13778	0.14284	0.15146	0.12626	0.12879	0.12843	0.16446	0.16263	0.16589	0.35636	0.16946	0.20341	0.14735	0.13587	0.15426	0.13884	0.14364	0.17042	0.18262	0.19093	0.18063	0.18733	0.21362	0.16839	0.29747	0.20251	0.19913	0.20378	0.20199
621	0.11511	0.1202	0.11766	0.11654	0.1193	0.12002	0.12548	0.11713	0.11764	0.12908	0.12562	0.11809	0.13243	0.13797	0.14531	0.13742	0.13416	0.14014	0.12607	0.13047	0.14073	0.14592	0.15482	0.12887	0.13147	0.13107	0.1686	0.16675	0.1702	0.41481	0.17389	0.21137	0.15053	0.13873	0.15767	0.14178	0.1467	0.17445	0.18823	0.1974	0.18603	0.1934	0.22312	0.17284	0.3274	0.21034	0.20654	0.2118	0.20966
622	0.11747	0.12265	0.12007	0.11892	0.12172	0.12247	0.12802	0.11953	0.12002	0.13171	0.1282	0.12047	0.13515	0.14083	0.14839	0.14033	0.13694	0.14312	0.12869	0.13316	0.14378	0.1491	0.1583	0.13154	0.1342	0.13377	0.17297	0.1711	0.17477	0.49846	0.17862	0.2205	0.15383	0.14167	0.16121	0.14482	0.14984	0.17869	0.19437	0.20458	0.19192	0.20012	0.23428	0.17759	0.36752	0.21929	0.2149	0.22095	0.2184
623	0.11987	0.12515	0.12253	0.12133	0.12417	0.12497	0.13061	0.12197	0.12243	0.1344	0.13084	0.12289	0.13795	0.14377	0.15157	0.14333	0.13979	0.14619	0.13136	0.13592	0.14692	0.15239	0.16193	0.13427	0.13701	0.13653	0.17762	0.17572	0.17966	0.6133	0.18368	0.23114	0.15724	0.1447	0.1649	0.14794	0.1531	0.18316	0.20118	0.21267	0.19841	0.20765	0.24764	0.18268	0.42191	0.22974	0.2245	0.2316	0.22851
624	0.1223	0.12768	0.12502	0.12379	0.12667	0.1275	0.13325	0.12445	0.12488	0.13715	0.13353	0.12535	0.14081	0.1468	0.15485	0.14642	0.14271	0.14936	0.13409	0.13874	0.15016	0.1558	0.16572	0.13707	0.13989	0.13936	0.18259	0.18065	0.18491	0.7505	0.18916	0.24382	0.16079	0.14782	0.16875	0.15117	0.15647	0.1879	0.20881	0.2219	0.20566	0.21622	0.26397	0.18819	0.49468	0.24217	0.23572	0.24422	0.24045
625	0.12477	0.13027	0.12756	0.12628	0.1292	0.13009	0.13594	0.12697	0.12737	0.13997	0.13628	0.12785	0.14375	0.14991	0.15825	0.14961	0.14572	0.15264	0.13688	0.14163	0.15352	0.15934	0.16969	0.13993	0.14284	0.14227	0.18793	0.18596	0.1906	0.87148	0.19512	0.25924	0.1645	0.15104	0.1728	0.15452	0.15997	0.19296	0.2175	0.2326	0.21386	0.22614	0.28433	0.1942	0.58702	0.25731	0.2491	0.2595	0.25483
626	0.12728	0.1329	0.13015	0.12882	0.13179	0.13272	0.13869	0.12953	0.1299	0.14285	0.1391	0.1304	0.14677	0.15313	0.16178	0.15291	0.14882	0.15604	0.13975	0.14461	0.15701	0.16303	0.17386	0.14287	0.14589	0.14525	0.19372	0.19169	0.1968	0.93104	0.20167	0.27839	0.16837	0.15437	0.17706	0.158	0.16361	0.19838	0.22756	0.2452	0.22329	0.23783	0.31017	0.2008	0.69132	0.27613	0.26543	0.27841	0.27251
627	0.12984	0.13559	0.13278	0.1314	0.13442	0.13541	0.14151	0.13215	0.13247	0.14581	0.142	0.13299	0.14989	0.15646	0.16546	0.15633	0.15202	0.15957	0.14269	0.14766	0.16064	0.16689	0.17826	0.1459	0.14902	0.14832	0.20004	0.19794	0.20362	0.92629	0.20897	0.30263	0.17243	0.15784	0.18156	0.16161	0.16742	0.20423	0.23942	0.26032	0.23434	0.25186	0.34333	0.20814	0.7865	0.30001	0.28582	0.30231	0.29474
628	0.13244	0.13833	0.13547	0.13403	0.1371	0.13816	0.14439	0.13481	0.1351	0.14886	0.14497	0.13563	0.1531	0.15991	0.16931	0.15988	0.15533	0.16326	0.14571	0.15082	0.16443	0.17094	0.18293	0.14902	0.15226	0.15149	0.20699	0.20481	0.2112	0.88658	0.21719	0.33378	0.17671	0.16144	0.18634	0.16539	0.17141	0.2106	0.25367	0.2788	0.24752	0.26904	0.386	0.21637	0.84691	0.33081	0.3119	0.33315	0.32329
629	0.13509	0.14114	0.13822	0.13671	0.13985	0.14097	0.14735	0.13754	0.13778	0.152	0.14802	0.13832	0.15643	0.16349	0.17333	0.16359	0.15875	0.1671	0.14883	0.15408	0.16839	0.1752	0.1879	0.15223	0.15562	0.15476	0.21472	0.21243	0.21972	0.83258	0.2266	0.37424	0.18124	0.16521	0.19146	0.16934	0.17561	0.21761	0.27117	0.30179	0.2636	0.29045	0.44023	0.22574	0.86259	0.37102	0.34601	0.37353	0.36059
630	0.1378	0.14402	0.14103	0.13945	0.14265	0.14385	0.1504	0.14032	0.14051	0.15524	0.15117	0.14107	0.15987	0.16723	0.17757	0.16746	0.16231	0.17114	0.15205	0.15745	0.17256	0.17971	0.19322	0.15556	0.1591	0.15815	0.22341	0.22099	0.22941	0.77235	0.23755	0.42694	0.18607	0.16915	0.19696	0.1735	0.18005	0.22539	0.29311	0.33085	0.28364	0.31759	0.5071	0.23653	0.84362	0.42373	0.39147	0.42684	0.40978
631	0.14057	0.14698	0.14392	0.14226	0.14552	0.14681	0.15353	0.14318	0.1433	0.15858	0.15442	0.14388	0.16345	0.17113	0.18204	0.17152	0.16602	0.17539	0.15538	0.16095	0.17695	0.18449	0.19896	0.15901	0.16272	0.16166	0.2333	0.23071	0.24057	0.7097	0.25054	0.49493	0.19124	0.17329	0.20293	0.17789	0.18477	0.23414	0.32116	0.36795	0.30915	0.35243	0.58497	0.24918	0.80495	0.49226	0.45263	0.49669	0.47442
632	0.1434	0.15001	0.14687	0.14513	0.14847	0.14985	0.15675	0.1461	0.14616	0.16205	0.15779	0.14676	0.16718	0.17523	0.18678	0.1758	0.16989	0.17988	0.15882	0.16459	0.1816	0.18959	0.2052	0.1626	0.16649	0.16532	0.24471	0.2419	0.25364	0.64654	0.26631	0.57957	0.19681	0.17767	0.20946	0.18255	0.18982	0.24411	0.35765	0.41548	0.3423	0.39748	0.66729	0.26423	0.75641	0.57826	0.53398	0.5849	0.55677
633	0.14631	0.15313	0.14991	0.14807	0.15149	0.15297	0.16009	0.1491	0.14909	0.16565	0.16128	0.14971	0.17108	0.17953	0.19184	0.18033	0.17395	0.18466	0.16241	0.16839	0.18654	0.19507	0.21204	0.16634	0.17044	0.16914	0.25807	0.25501	0.26917	0.58371	0.28592	0.67641	0.20287	0.18231	0.21668	0.18752	0.19524	0.25565	0.4057	0.47582	0.38607	0.45558	0.74136	0.28248	0.7032	0.67731	0.6364	0.6866	0.65386
634	0.14928	0.15635	0.15304	0.1511	0.1546	0.15619	0.16354	0.15219	0.1521	0.1694	0.1649	0.15274	0.17516	0.18409	0.19727	0.18513	0.17822	0.18976	0.16614	0.17237	0.19182	0.20098	0.21959	0.17024	0.17459	0.17313	0.27395	0.27061	0.28794	0.52166	0.31095	0.77011	0.20951	0.18727	0.22475	0.19285	0.20113	0.26922	0.46894	0.55007	0.44426	0.52878	0.7925	0.30498	0.64824	0.77331	0.74888	0.78434	0.75177
635	0.15234	0.15967	0.15626	0.15421	0.1578	0.15952	0.16711	0.15536	0.15518	0.17331	0.16868	0.15586	0.17946	0.18893	0.20313	0.19027	0.18273	0.19525	0.17003	0.17654	0.19749	0.20742	0.22804	0.17433	0.17896	0.17733	0.29313	0.28951	0.31099	0.46067	0.3437	0.83738	0.21688	0.19258	0.23389	0.19861	0.20757	0.28544	0.55014	0.63534	0.52057	0.61583	0.81278	0.33317	0.59314	0.84167	0.84322	0.85214	0.82664
636	0.15549	0.16311	0.15959	0.15741	0.16111	0.16296	0.17082	0.15864	0.15836	0.1774	0.17262	0.15906	0.184	0.19409	0.20951	0.19578	0.18752	0.20119	0.17412	0.18094	0.20363	0.21449	0.23759	0.17863	0.18359	0.18175	0.31661	0.31286	0.33967	0.40107	0.38738	0.86326	0.22513	0.19833	0.24439	0.20489	0.2147	0.30511	0.64728	0.72123	0.6155	0.70798	0.80499	0.36891	0.53877	0.86697	0.89084	0.87504	0.86029
637	0.15873	0.16666	0.16304	0.16071	0.16452	0.16652	0.17469	0.16202	0.16163	0.1817	0.17675	0.16236	0.18882	0.19964	0.21652	0.20176	0.19262	0.20769	0.1784	0.18559	0.21031	0.22232	0.24853	0.18318	0.18851	0.18642	0.34574	0.34222	0.37577	0.34337	0.44607	0.85193	0.23451	0.2046	0.25662	0.21179	0.22266	0.32921	0.74736	0.79033	0.71978	0.78743	0.77754	0.41447	0.48551	0.85422	0.88891	0.85977	0.85423
638	0.16208	0.17036	0.1666	0.16412	0.16805	0.17023	0.17873	0.16552	0.165	0.18623	0.1811	0.16577	0.19396	0.20564	0.2243	0.20827	0.19809	0.21484	0.18293	0.19053	0.21765	0.23109	0.26124	0.18799	0.19376	0.1914	0.38218	0.37971	0.42138	0.28848	0.52369	0.8172	0.24525	0.2115	0.27105	0.21945	0.23167	0.35872	0.82621	0.82751	0.81043	0.83536	0.73812	0.47225	0.43352	0.81811	0.85545	0.82195	0.82226
639	0.16554	0.17421	0.17031	0.16765	0.17171	0.17408	0.18296	0.16915	0.16849	0.19103	0.18568	0.16929	0.19948	0.21218	0.23303	0.21542	0.204	0.22279	0.18772	0.19582	0.22578	0.24104	0.27623	0.19312	0.19941	0.19671	0.42795	0.42808	0.47874	0.2378	0.62046	0.77011	0.25769	0.21917	0.2882	0.22802	0.24198	0.39446	0.86334	0.83023	0.8619	0.84523	0.69174	0.5437	0.3829	0.76987	0.80696	0.7727	0.77651
640	0.16913	0.17822	0.17417	0.17131	0.17552	0.1781	0.1874	0.17293	0.1721	0.19612	0.19054	0.17294	0.20544	0.21938	0.24296	0.22336	0.21042	0.2317	0.19281	0.2015	0.23488	0.25248	0.29418	0.19861	0.20553	0.20242	0.48498	0.49035	0.54913	0.19312	0.7261	0.71666	0.27217	0.22779	0.30869	0.23772	0.2539	0.43658	0.85865	0.80707	0.86743	0.82499	0.64142	0.62695	0.33388	0.71544	0.75127	0.71772	0.72366
641	0.17285	0.18242	0.1782	0.17512	0.17948	0.18231	0.19208	0.17685	0.17585	0.20157	0.19571	0.17673	0.21194	0.22739	0.25442	0.23224	0.21745	0.24178	0.19826	0.20765	0.2452	0.26582	0.316	0.20453	0.21219	0.20861	0.55403	0.56846	0.63057	0.15613	0.81608	0.66016	0.28908	0.23758	0.33312	0.24879	0.26781	0.48414	0.82653	0.76817	0.84026	0.78642	0.58894	0.71309	0.28704	0.65805	0.6923	0.66012	0.66733
642	0.17673	0.18683	0.18242	0.17908	0.18363	0.18672	0.19703	0.18095	0.17974	0.20741	0.20124	0.18067	0.21907	0.23641	0.26785	0.24228	0.2252	0.25327	0.20411	0.21435	0.25703	0.28162	0.3428	0.21094	0.21949	0.21535	0.63227	0.6596	0.7144	0.12755	0.8652	0.60243	0.30882	0.24884	0.36208	0.26152	0.28415	0.53481	0.77987	0.72035	0.79559	0.73769	0.53535	0.78537	0.24329	0.59949	0.63216	0.60159	0.60952
643	0.18077	0.19146	0.18684	0.18322	0.18796	0.19137	0.20229	0.18524	0.1838	0.21372	0.20719	0.18477	0.227	0.24671	0.28383	0.25371	0.23382	0.26647	0.21043	0.2217	0.27081	0.30062	0.37583	0.21795	0.22758	0.22276	0.71034	0.75107	0.7846	0.10681	0.8688	0.54445	0.33188	0.26194	0.39606	0.27629	0.30347	0.58476	0.72573	0.66767	0.74209	0.68352	0.48136	0.82729	0.20387	0.54073	0.57193	0.54301	0.55133
644	0.18499	0.19636	0.1915	0.18755	0.19252	0.19628	0.20789	0.18974	0.18803	0.22058	0.21363	0.18906	0.23591	0.25862	0.30309	0.2669	0.2435	0.28178	0.21731	0.22984	0.28709	0.32375	0.4162	0.22566	0.23661	0.23099	0.7731	0.82129	0.82543	0.092461	0.84071	0.48679	0.35873	0.27737	0.43533	0.29356	0.32647	0.62911	0.66789	0.61251	0.68418	0.62659	0.42749	0.83401	0.17003	0.48233	0.51215	0.48489	0.49338
645	0.18941	0.20155	0.19642	0.1921	0.19732	0.20147	0.21391	0.19448	0.19246	0.22809	0.22064	0.19355	0.24605	0.27261	0.32655	0.28227	0.25449	0.29969	0.22486	0.23894	0.30658	0.35211	0.46437	0.23423	0.24679	0.24021	0.80718	0.85316	0.83204	0.08287	0.79584	0.42986	0.38984	0.29581	0.4796	0.31395	0.35394	0.66301	0.60841	0.55627	0.62429	0.56843	0.37432	0.81311	0.14256	0.42473	0.45321	0.4276	0.43612
646	0.19406	0.20707	0.20164	0.1969	0.20239	0.20701	0.22039	0.19948	0.19712	0.23639	0.22835	0.19826	0.25777	0.28926	0.35525	0.30039	0.26708	0.32083	0.23322	0.24922	0.33024	0.38696	0.51951	0.24384	0.25841	0.25067	0.80987	0.8472	0.81155	0.076691	0.7424	0.37411	0.42551	0.31814	0.52763	0.33818	0.38677	0.68308	0.54843	0.4998	0.56372	0.50994	0.32259	0.7752	0.12144	0.36843	0.39545	0.37158	0.38001
647	0.19897	0.21298	0.20719	0.20196	0.20778	0.21292	0.22741	0.20478	0.20201	0.24563	0.23688	0.20322	0.2715	0.30935	0.39039	0.32201	0.28171	0.34596	0.24255	0.26099	0.35926	0.42959	0.57885	0.25476	0.27182	0.26271	0.78819	0.81594	0.77409	0.072931	0.68462	0.32022	0.46571	0.34553	0.57683	0.36713	0.42578	0.68846	0.48862	0.44368	0.50322	0.45172	0.27336	0.72769	0.10593	0.31417	0.33943	0.3175	0.3257
648	0.20416	0.21933	0.21314	0.20734	0.21353	0.21928	0.23509	0.21042	0.20718	0.25603	0.24644	0.20846	0.28788	0.33389	0.4331	0.34807	0.29891	0.37598	0.25308	0.27463	0.39514	0.48094	0.63725	0.26733	0.28752	0.27675	0.75105	0.77075	0.72699	0.070886	0.62489	0.26923	0.50975	0.37946	0.62315	0.40177	0.47141	0.6805	0.4295	0.38847	0.44334	0.39437	0.22806	0.67495	0.094936	0.26307	0.28605	0.26642	0.27421
649	0.20968	0.22619	0.21953	0.21306	0.21968	0.22615	0.24354	0.21644	0.21266	0.26788	0.25725	0.21401	0.30773	0.36415	0.48416	0.37974	0.31938	0.41185	0.26513	0.29067	0.43953	0.54087	0.68792	0.282	0.30615	0.2934	0.7051	0.71843	0.67471	0.070057	0.5645	0.22259	0.55602	0.42164	0.66175	0.44301	0.52324	0.66175	0.37166	0.33484	0.38464	0.33859	0.18828	0.61956	0.08737	0.21668	0.23667	0.21981	0.22697
650	0.21556	0.23365	0.22644	0.21919	0.22631	0.23361	0.25293	0.22289	0.21848	0.28153	0.26965	0.21992	0.33222	0.40168	0.54303	0.41834	0.34403	0.4544	0.2791	0.30983	0.49381	0.60683	0.72416	0.29939	0.32858	0.31347	0.65431	0.6625	0.61977	0.070102	0.50414	0.182	0.60162	0.47373	0.6883	0.49132	0.57915	0.635	0.31593	0.28375	0.32788	0.28546	0.15533	0.56296	0.082354	0.17669	0.19305	0.17941	0.18567
651	0.22187	0.24182	0.23395	0.22578	0.23349	0.24178	0.26346	0.22985	0.2247	0.29748	0.28407	0.22622	0.36288	0.448	0.60676	0.46508	0.37397	0.50393	0.29553	0.33306	0.55805	0.67261	0.74202	0.32035	0.35591	0.33808	0.60108	0.60501	0.5637	0.070769	0.44434	0.14881	0.64267	0.53641	0.70047	0.54609	0.63478	0.60264	0.26353	0.23653	0.27424	0.23642	0.12971	0.50606	0.079216	0.14437	0.15678	0.14652	0.15172
652	0.22867	0.25084	0.24219	0.2329	0.24132	0.25079	0.2754	0.2374	0.23138	0.31636	0.30109	0.23298	0.40166	0.50406	0.66883	0.52048	0.41046	0.55944	0.31519	0.36162	0.6291	0.72858	0.74157	0.34601	0.38955	0.36869	0.54684	0.54713	0.50739	0.071881	0.38566	0.1234	0.67496	0.60768	0.69842	0.60467	0.68363	0.56656	0.21613	0.19477	0.22531	0.19322	0.11089	0.44945	0.077465	0.11992	0.12861	0.12149	0.1256
653	0.23603	0.26088	0.25128	0.24066	0.24992	0.26082	0.28908	0.24562	0.23857	0.33898	0.32151	0.24025	0.45072	0.56896	0.7201	0.58322	0.45468	0.61777	0.33909	0.39705	0.69898	0.76518	0.72577	0.37788	0.43113	0.40714	0.4925	0.48953	0.45145	0.073311	0.32887	0.10506	0.69516	0.68071	0.68415	0.66171	0.71889	0.52816	0.17551	0.1599	0.18291	0.15742	0.097682	0.39368	0.076741	0.10245	0.10809	0.10351	0.10667
654	0.24406	0.27217	0.2614	0.24916	0.25945	0.27207	0.30497	0.25466	0.24637	0.36635	0.34641	0.24812	0.51166	0.63812	0.75218	0.64855	0.50714	0.67291	0.36863	0.44113	0.75562	0.77779	0.69862	0.41782	0.4821	0.45542	0.43862	0.43268	0.39639	0.074967	0.27512	0.092385	0.70193	0.74344	0.66041	0.70957	0.73616	0.48847	0.14293	0.13259	0.14849	0.12967	0.08874	0.33942	0.076783	0.090475	0.093834	0.091122	0.093534
655	0.25288	0.28499	0.27277	0.25854	0.27011	0.28482	0.32361	0.26464	0.25488	0.39961	0.3772	0.25668	0.58395	0.70268	0.7614	0.708	0.56676	0.71721	0.40559	0.49532	0.7884	0.76807	0.66359	0.46782	0.54302	0.51503	0.38573	0.37707	0.3428	0.076783	0.22603	0.083925	0.69582	0.78341	0.62977	0.741	0.73484	0.44827	0.11853	0.11246	0.12244	0.10948	0.08292	0.2876	0.077391	0.082543	0.084279	0.082887	0.084743
656	0.26263	0.2997	0.28569	0.26899	0.28215	0.29943	0.34571	0.27576	0.26421	0.43987	0.41565	0.26605	0.66186	0.7513	0.75008	0.75146	0.62937	0.74412	0.45205	0.5596	0.79426	0.74179	0.62321	0.52916	0.61171	0.58523	0.33438	0.32334	0.29155	0.078713	0.18344	0.078511	0.67884	0.79491	0.59428	0.75238	0.71781	0.40818	0.10124	0.098311	0.10382	0.095449	0.079362	0.23957	0.07842	0.077519	0.078109	0.07764	0.079089
657	0.27352	0.31677	0.30052	0.28074	0.29588	0.31633	0.37209	0.28825	0.27453	0.48784	0.4637	0.27636	0.73342	0.77573	0.72333	0.77201	0.68756	0.75094	0.50986	0.6307	0.77741	0.70464	0.57932	0.60079	0.68174	0.66089	0.2854	0.27247	0.24384	0.080724	0.14884	0.075265	0.65334	0.78075	0.55549	0.74459	0.68897	0.36873	0.089489	0.088723	0.091109	0.086059	0.077426	0.19695	0.07976	0.074558	0.07434	0.074517	0.075671
658	0.28578	0.33679	0.31774	0.29408	0.31173	0.33611	0.40364	0.30241	0.28602	0.54298	0.5227	0.28778	0.78363	0.77492	0.68629	0.76932	0.73215	0.73959	0.57916	0.70007	0.74535	0.66073	0.53317	0.6765	0.74197	0.73065	0.23994	0.22584	0.20123	0.082794	0.12261	0.073571	0.62149	0.74879	0.5145	0.72171	0.65195	0.33042	0.081772	0.082471	0.082712	0.080009	0.076659	0.16123	0.081329	0.073074	0.072282	0.072914	0.073853
659	0.29973	0.36045	0.33796	0.30938	0.33022	0.35942	0.44114	0.31861	0.29892	0.60252	0.59189	0.30051	0.80316	0.75373	0.64263	0.74809	0.75622	0.71436	0.65584	0.75533	0.70411	0.61275	0.48566	0.74414	0.78094	0.78046	0.19942	0.18509	0.16519	0.084907	0.10387	0.072987	0.58506	0.70601	0.47213	0.68829	0.60946	0.29378	0.076923	0.078615	0.077388	0.076336	0.076732	0.1332	0.083068	0.072643	0.071445	0.072396	0.073179
660	0.31578	0.3886	0.36196	0.32713	0.35201	0.38708	0.48493	0.3373	0.31354	0.66065	0.6659	0.3148	0.79336	0.71869	0.59479	0.7143	0.75822	0.67956	0.72929	0.78583	0.65749	0.56241	0.43749	0.78971	0.7929	0.8011	0.16519	0.15158	0.13661	0.087053	0.091062	0.073197	0.54542	0.65691	0.42902	0.64792	0.56345	0.25941	0.074107	0.076475	0.074237	0.074351	0.077407	0.11254	0.084934	0.072965	0.071479	0.072656	0.073323
661	0.33443	0.42208	0.3907	0.34795	0.3779	0.4199	0.53425	0.35907	0.33026	0.70906	0.73324	0.33096	0.76276	0.67492	0.54437	0.6726	0.74162	0.63847	0.78445	0.78878	0.60772	0.51084	0.38929	0.80551	0.78042	0.79349	0.13797	0.12577	0.11529	0.089227	0.082602	0.073977	0.50357	0.6041	0.38573	0.60311	0.51524	0.22793	0.072738	0.075568	0.072634	0.073572	0.078515	0.098016	0.086894	0.073827	0.072138	0.073473	0.074055
662	0.35635	0.46161	0.42522	0.37259	0.40876	0.45858	0.58664	0.38459	0.34954	0.74	0.78013	0.34935	0.71968	0.62577	0.49249	0.62606	0.71159	0.59336	0.81005	0.76891	0.55626	0.45881	0.34176	0.7937	0.75035	0.76508	0.11757	0.10704	0.10019	0.091424	0.077229	0.075164	0.46029	0.5493	0.34287	0.55556	0.46583	0.19996	0.072396	0.07554	0.072125	0.073648	0.079932	0.088198	0.088928	0.075073	0.073242	0.074688	0.075206
663	0.38236	0.50732	0.46656	0.40194	0.44543	0.50331	0.63731	0.41465	0.37196	0.74988	0.7982	0.37039	0.6694	0.57333	0.44	0.57661	0.67267	0.54573	0.80564	0.73386	0.50398	0.40692	0.2958	0.7627	0.70928	0.72398	0.10299	0.094037	0.089881	0.093642	0.074051	0.076643	0.41619	0.49359	0.30113	0.50641	0.41597	0.17597	0.07279	0.076146	0.072401	0.074339	0.081571	0.081806	0.091021	0.076595	0.074665	0.076187	0.076658
664	0.41342	0.5582	0.51524	0.43695	0.48843	0.55322	0.68005	0.45	0.39821	0.73996	0.78853	0.39456	0.61502	0.51906	0.38764	0.52556	0.62808	0.49664	0.77863	0.68963	0.45152	0.35583	0.2525	0.72015	0.66165	0.67553	0.092954	0.085327	0.083104	0.095883	0.072423	0.07833	0.3719	0.43776	0.26141	0.45647	0.36642	0.15612	0.073707	0.077203	0.073234	0.075465	0.08337	0.077865	0.093161	0.078313	0.076315	0.07789	0.078324
665	0.45053	0.61131	0.57045	0.4784	0.53734	0.6056	0.70906	0.49116	0.42899	0.71484	0.75895	0.42239	0.55835	0.46394	0.33628	0.47375	0.57992	0.44685	0.7379	0.6399	0.39937	0.30636	0.21318	0.67091	0.6101	0.62278	0.086286	0.07972	0.078871	0.098145	0.0719	0.080166	0.3281	0.38256	0.22478	0.4064	0.31804	0.14028	0.074996	0.078583	0.074464	0.076903	0.085284	0.075677	0.095342	0.08017	0.078126	0.079738	0.080144
666	0.49446	0.66147	0.62892	0.52641	0.59007	0.65564	0.72121	0.53792	0.46495	0.67929	0.71723	0.45429	0.50062	0.4088	0.28699	0.42184	0.52962	0.39698	0.68939	0.58696	0.34813	0.25963	0.1791	0.6178	0.55634	0.56764	0.082061	0.076333	0.076461	0.10043	0.072165	0.082108	0.28565	0.32883	0.19231	0.35688	0.2719	0.12803	0.076551	0.080193	0.075978	0.078562	0.087283	0.074743	0.097561	0.082128	0.080053	0.08169	0.082073
667	0.54517	0.70214	0.68428	0.57968	0.64224	0.69703	0.71678	0.5887	0.50636	0.63702	0.66854	0.49051	0.44271	0.35451	0.24116	0.37045	0.47817	0.34773	0.63648	0.5323	0.29862	0.21705	0.15115	0.56258	0.50148	0.51134	0.079596	0.074527	0.075351	0.10274	0.072989	0.084128	0.24564	0.27772	0.1649	0.30871	0.22936	0.11882	0.078294	0.081967	0.07769	0.080377	0.089345	0.074701	0.099815	0.084159	0.082062	0.083717	0.084081
668	0.60068	0.72756	0.72796	0.63438	0.6873	0.72398	0.69866	0.63968	0.55251	0.59048	0.61578	0.53069	0.38544	0.30215	0.20037	0.32036	0.42633	0.29997	0.58112	0.47689	0.25201	0.1801	0.12946	0.50636	0.44631	0.45473	0.078405	0.073857	0.075177	0.10508	0.074213	0.086205	0.20931	0.23075	0.14288	0.263	0.19187	0.11209	0.08017	0.083858	0.079545	0.082304	0.091455	0.075299	0.1021	0.086243	0.084131	0.0858	0.086147
669	0.65626	0.73499	0.75276	0.68417	0.71864	0.73344	0.67027	0.68505	0.60115	0.54136	0.56081	0.57359	0.32977	0.25314	0.16605	0.27262	0.37482	0.25488	0.52458	0.42148	0.2098	0.14988	0.11345	0.44995	0.39154	0.39855	0.078131	0.073998	0.075671	0.10745	0.07572	0.088325	0.17784	0.18962	0.12606	0.2211	0.16062	0.10733	0.082141	0.085834	0.081501	0.084312	0.093604	0.076355	0.10443	0.088368	0.086245	0.087925	0.088258
670	0.70441	0.72536	0.75602	0.72145	0.732	0.72591	0.63466	0.71823	0.64796	0.49079	0.50479	0.61661	0.27698	0.20917	0.13894	0.22859	0.32447	0.21387	0.46773	0.36684	0.17351	0.12665	0.10214	0.39403	0.33795	0.34361	0.078522	0.07472	0.076644	0.10986	0.077428	0.09048	0.152	0.15576	0.11375	0.18449	0.13612	0.10412	0.08418	0.087871	0.083528	0.086378	0.095786	0.077736	0.10679	0.090525	0.088394	0.090083	0.090404
671	0.73716	0.70206	0.74026	0.74056	0.72726	0.70448	0.59408	0.73461	0.68699	0.43959	0.44856	0.6557	0.22874	0.17187	0.11877	0.18982	0.27642	0.17838	0.41124	0.31392	0.14415	0.10973	0.09445	0.33942	0.28665	0.29102	0.079397	0.075859	0.077961	0.1123	0.07928	0.092665	0.1319	0.12964	0.1051	0.15427	0.11794	0.10213	0.086269	0.089955	0.085608	0.088487	0.097998	0.079351	0.10918	0.09271	0.090572	0.09227	0.092579
672	0.74961	0.66882	0.71033	0.73992	0.70719	0.67281	0.55013	0.73307	0.71256	0.3885	0.39284	0.68616	0.18686	0.14222	0.10452	0.15758	0.23204	0.14943	0.35584	0.26397	0.12185	0.097954	0.089456	0.2872	0.23906	0.24224	0.080623	0.077296	0.079523	0.11479	0.081232	0.094875	0.11705	0.1107	0.09926	0.13081	0.1051	0.1011	0.088395	0.092075	0.087727	0.090631	0.10024	0.08113	0.11162	0.09492	0.092774	0.094483	0.09478
673	0.74185	0.6288	0.67101	0.72207	0.67581	0.63406	0.50396	0.71591	0.7214	0.3383	0.33844	0.70399	0.15274	0.12012	0.094847	0.13241	0.19292	0.1272	0.30251	0.21862	0.10579	0.090052	0.086441	0.23885	0.19689	0.19899	0.082105	0.078946	0.081262	0.11732	0.083256	0.09711	0.10652	0.09761	0.095551	0.11358	0.096396	0.10081	0.090552	0.094226	0.089876	0.092803	0.1025	0.083029	0.11411	0.097154	0.095	0.09672	0.097005
674	0.71773	0.58426	0.62574	0.69142	0.63668	0.59057	0.45642	0.68695	0.71363	0.29004	0.28648	0.70727	0.1268	0.10452	0.088539	0.11389	0.16035	0.11104	0.25259	0.17953	0.094701	0.08498	0.084868	0.1961	0.16167	0.16287	0.083775	0.080749	0.083128	0.1199	0.085333	0.099369	0.099373	0.088897	0.093422	0.1015	0.090741	0.10112	0.092733	0.096406	0.092051	0.095	0.1048	0.085014	0.11664	0.099411	0.097248	0.098981	0.099254
675	0.68218	0.53676	0.57672	0.65208	0.59236	0.54393	0.40827	0.64979	0.69201	0.24501	0.23843	0.69663	0.10822	0.093968	0.084662	0.10088	0.13486	0.099797	0.2078	0.14791	0.087321	0.081958	0.084343	0.1605	0.13412	0.13462	0.085584	0.082662	0.085088	0.12253	0.08745	0.10165	0.094761	0.083336	0.092461	0.093351	0.087307	0.10188	0.094938	0.098612	0.094248	0.097221	0.10713	0.087063	0.11923	0.10169	0.09952	0.10127	0.10153
676	0.63921	0.48745	0.52545	0.60708	0.54466	0.49533	0.36027	0.60717	0.66006	0.20473	0.19599	0.6743	0.095538	0.087094	0.08252	0.092095	0.11607	0.092276	0.16981	0.12397	0.082632	0.080406	0.084574	0.13278	0.11389	0.11393	0.087496	0.084657	0.087116	0.12523	0.089597	0.10397	0.092017	0.080012	0.092356	0.088102	0.085467	0.10299	0.097165	0.10085	0.096467	0.099465	0.10948	0.08916	0.12187	0.104	0.10182	0.10358	0.10383
677	0.59153	0.4372	0.47297	0.55846	0.49486	0.44565	0.31335	0.56097	0.62095	0.17056	0.16068	0.64311	0.087187	0.082844	0.08162	0.086406	0.10287	0.087477	0.13964	0.10687	0.079883	0.079912	0.08535	0.11253	0.099779	0.09953	0.089486	0.086712	0.089197	0.128	0.091769	0.10631	0.090638	0.078279	0.092876	0.084948	0.084772	0.10438	0.099414	0.10311	0.098708	0.10173	0.11188	0.091294	0.12457	0.10634	0.10414	0.10592	0.10616
678	0.54093	0.3868	0.42011	0.50762	0.44395	0.39565	0.26863	0.5125	0.57702	0.14329	0.13321	0.60559	0.081908	0.080455	0.081605	0.082944	0.093949	0.084645	0.11725	0.095189	0.078528	0.080176	0.08652	0.098471	0.090316	0.089895	0.091537	0.088812	0.09132	0.13084	0.093963	0.10868	0.090249	0.077678	0.093854	0.083303	0.084897	0.10598	0.10169	0.1054	0.10097	0.10403	0.11431	0.093461	0.12735	0.10871	0.10649	0.1083	0.10852
679	0.48863	0.33712	0.36766	0.45557	0.39279	0.34616	0.2275	0.4627	0.52991	0.12281	0.11315	0.56369	0.078797	0.07939	0.08222	0.081081	0.088161	0.08323	0.10151	0.087491	0.078178	0.080983	0.087975	0.089074	0.084205	0.083681	0.093637	0.09095	0.093478	0.13376	0.096179	0.11109	0.090578	0.077882	0.095166	0.082742	0.085607	0.10775	0.10399	0.10773	0.10326	0.10635	0.11678	0.095656	0.1302	0.11111	0.10888	0.11071	0.11091
680	0.43556	0.28923	0.31657	0.4032	0.34228	0.29819	0.19134	0.41235	0.48081	0.10818	0.099213	0.51881	0.077228	0.079269	0.083285	0.08037	0.084633	0.082836	0.090892	0.082645	0.078549	0.082182	0.089636	0.083028	0.080486	0.079899	0.095779	0.093119	0.095667	0.13678	0.098415	0.11354	0.091428	0.078661	0.096725	0.082961	0.086737	0.10966	0.10631	0.11009	0.10557	0.10871	0.11929	0.097878	0.13313	0.11355	0.1113	0.11315	0.11334
681	0.38258	0.24447	0.26808	0.3514	0.29355	0.25301	0.16124	0.36224	0.43066	0.098149	0.089904	0.47204	0.076755	0.079818	0.084672	0.080485	0.082731	0.083176	0.083985	0.07983	0.079439	0.083661	0.091449	0.079363	0.078472	0.077847	0.097956	0.095316	0.097884	0.13989	0.10067	0.11602	0.092654	0.079847	0.098467	0.08374	0.088169	0.11167	0.10867	0.1125	0.10792	0.11109	0.12186	0.10012	0.13615	0.11603	0.11376	0.11564	0.11581
682	0.33066	0.20438	0.22371	0.30126	0.24797	0.21211	0.13758	0.31329	0.38034	0.091542	0.083924	0.42422	0.077058	0.080843	0.086289	0.081191	0.081994	0.08404	0.079714	0.07846	0.080699	0.085342	0.093374	0.077391	0.077674	0.077025	0.10017	0.09754	0.10013	0.14312	0.10295	0.11856	0.094155	0.081325	0.10035	0.084919	0.089818	0.11378	0.11106	0.11494	0.11029	0.11352	0.12448	0.1024	0.13928	0.11856	0.11626	0.11818	0.11832
683	0.281	0.17033	0.18507	0.25416	0.20709	0.17692	0.12001	0.26669	0.33079	0.087408	0.080298	0.37615	0.077908	0.082202	0.088069	0.082316	0.082084	0.085278	0.077301	0.078114	0.082224	0.087168	0.095383	0.076617	0.077735	0.077072	0.10241	0.099789	0.1024	0.14648	0.10526	0.12114	0.095855	0.083007	0.10233	0.086384	0.091624	0.11597	0.11349	0.11743	0.11271	0.11598	0.12716	0.1047	0.14252	0.12113	0.11881	0.12076	0.12089
684	0.23512	0.14314	0.1534	0.21168	0.17235	0.14841	0.10757	0.2239	0.28318	0.085046	0.078338	0.3287	0.079144	0.083798	0.089967	0.083742	0.082766	0.086784	0.076208	0.078495	0.083937	0.089099	0.097458	0.076695	0.078407	0.077735	0.10468	0.10207	0.1047	0.14998	0.10759	0.12378	0.097702	0.084836	0.1044	0.088054	0.093544	0.11822	0.11596	0.11997	0.11516	0.11849	0.1299	0.10703	0.14588	0.12376	0.12141	0.1234	0.1235
685	0.19467	0.12273	0.1291	0.17538	0.14462	0.1267	0.099109	0.18646	0.23893	0.083958	0.077567	0.28294	0.080654	0.085565	0.091952	0.085383	0.083871	0.088484	0.07606	0.079395	0.085788	0.091109	0.099585	0.077381	0.079516	0.078838	0.10699	0.10437	0.10704	0.15364	0.10996	0.12648	0.099661	0.08677	0.10654	0.089874	0.09555	0.12054	0.11847	0.12257	0.11765	0.12105	0.13272	0.10939	0.14939	0.12645	0.12407	0.1261	0.12617
686	0.16107	0.10822	0.11154	0.14627	0.12384	0.11107	0.093597	0.1556	0.19963	0.083786	0.077646	0.24018	0.082361	0.087453	0.094003	0.087181	0.08528	0.090326	0.076587	0.080664	0.087739	0.093179	0.10176	0.078501	0.080935	0.080253	0.10933	0.1067	0.1094	0.15749	0.11235	0.12925	0.10171	0.088782	0.10873	0.091804	0.097622	0.12292	0.12104	0.12523	0.12019	0.12366	0.13561	0.11179	0.15305	0.12921	0.12679	0.12887	0.12891
687	0.13494	0.098351	0.099476	0.12438	0.10909	0.10034	0.090225	0.13173	0.16664	0.084275	0.078332	0.20191	0.084207	0.08943	0.096104	0.089092	0.086908	0.092271	0.077594	0.082197	0.089764	0.095296	0.10397	0.079929	0.082576	0.081891	0.11171	0.10907	0.1118	0.16154	0.11479	0.13209	0.10382	0.090851	0.11098	0.093816	0.099748	0.12536	0.12365	0.12795	0.12278	0.12633	0.13859	0.11423	0.15688	0.13203	0.12959	0.13171	0.13172
688	0.11587	0.091913	0.09151	0.10884	0.099101	0.093265	0.088405	0.11435	0.14063	0.085238	0.079449	0.16946	0.086152	0.091472	0.098247	0.091087	0.088693	0.094295	0.078942	0.083917	0.091845	0.097453	0.10621	0.081576	0.084375	0.083687	0.11412	0.11147	0.11424	0.16584	0.11726	0.13501	0.10599	0.092965	0.11327	0.095891	0.10192	0.12785	0.12632	0.13074	0.12542	0.12906	0.14167	0.1167	0.16092	0.13494	0.13245	0.13464	0.13461
689	0.10266	0.087932	0.08647	0.098316	0.0926	0.088821	0.087709	0.1023	0.12137	0.086541	0.080872	0.14358	0.088168	0.093564	0.10042	0.093146	0.090592	0.096379	0.080532	0.08577	0.09397	0.099642	0.10849	0.083378	0.086287	0.085595	0.11658	0.11391	0.11672	0.17042	0.11978	0.13803	0.10821	0.095115	0.1156	0.098017	0.10413	0.1304	0.12906	0.13361	0.12813	0.13186	0.14485	0.11923	0.16519	0.13794	0.1354	0.13765	0.13758
690	0.093889	0.085708	0.083503	0.091462	0.08859	0.086261	0.087827	0.094292	0.10785	0.088089	0.082512	0.12417	0.090238	0.095695	0.10263	0.095255	0.092576	0.098512	0.082293	0.08772	0.096132	0.10186	0.11081	0.085292	0.088281	0.087584	0.11908	0.11639	0.11925	0.17533	0.12234	0.14114	0.11048	0.097295	0.11799	0.10019	0.10637	0.13302	0.13187	0.13656	0.1309	0.13474	0.14815	0.1218	0.16971	0.14103	0.13845	0.14077	0.14065
691	0.088292	0.084741	0.082011	0.087211	0.086352	0.085051	0.088527	0.089196	0.098774	0.089814	0.084308	0.1104	0.092348	0.097858	0.10487	0.097404	0.094625	0.10069	0.084177	0.08974	0.098325	0.10411	0.11316	0.087285	0.090335	0.089633	0.12162	0.11892	0.12183	0.18063	0.12496	0.14436	0.11279	0.099502	0.12041	0.10239	0.10865	0.13569	0.13476	0.13961	0.13375	0.13771	0.15158	0.12442	0.17454	0.14423	0.14159	0.14399	0.14382
692	0.084925	0.084675	0.081573	0.084799	0.085378	0.084808	0.089645	0.086165	0.092918	0.091668	0.086214	0.10106	0.09449	0.10005	0.10714	0.099589	0.096725	0.1029	0.086148	0.091813	0.10055	0.10639	0.11555	0.089337	0.092436	0.091726	0.12422	0.1215	0.12446	0.18642	0.12763	0.1477	0.11513	0.10174	0.12288	0.10463	0.11096	0.13843	0.13773	0.14276	0.13668	0.14077	0.15515	0.12711	0.17972	0.14755	0.14485	0.14734	0.1471
693	0.083167	0.08526	0.0819	0.083721	0.085322	0.085268	0.091065	0.084634	0.089365	0.09362	0.088201	0.094966	0.096659	0.10227	0.10943	0.10181	0.098867	0.10514	0.088185	0.093928	0.1028	0.1087	0.11797	0.091435	0.094574	0.093855	0.12688	0.12413	0.12716	0.19278	0.13037	0.15118	0.11753	0.10399	0.1254	0.1069	0.1133	0.14124	0.1408	0.14603	0.1397	0.14393	0.1589	0.12985	0.18532	0.151	0.14824	0.15082	0.15052
694	0.082556	0.086306	0.082765	0.083593	0.085914	0.086223	0.092703	0.084176	0.087467	0.095644	0.090249	0.091226	0.098852	0.10451	0.11176	0.10405	0.10104	0.10742	0.09027	0.096076	0.10508	0.11104	0.12044	0.093567	0.096743	0.096014	0.1296	0.12682	0.12992	0.19987	0.13318	0.15482	0.11996	0.10628	0.12797	0.1092	0.11568	0.14413	0.14397	0.14943	0.14282	0.14721	0.16283	0.13267	0.19141	0.15461	0.15177	0.15446	0.15409
695	0.08276	0.087678	0.08401	0.084136	0.086965	0.087531	0.0945	0.084482	0.086756	0.097725	0.092342	0.089196	0.10107	0.10678	0.11411	0.10633	0.10325	0.10973	0.092392	0.098253	0.10738	0.11342	0.12295	0.095729	0.09894	0.098198	0.13239	0.12957	0.13275	0.2079	0.13606	0.15863	0.12244	0.10859	0.1306	0.11154	0.1181	0.1471	0.14726	0.15297	0.14605	0.15062	0.16699	0.13557	0.1981	0.15839	0.15546	0.15828	0.15782
696	0.083539	0.089284	0.085526	0.085154	0.088342	0.089091	0.096413	0.08533	0.086888	0.099852	0.094472	0.088388	0.10331	0.10908	0.1165	0.10864	0.10549	0.11207	0.094545	0.10046	0.10972	0.11583	0.12551	0.097917	0.10116	0.10041	0.13525	0.1324	0.13566	0.21714	0.13903	0.16264	0.12497	0.11094	0.13328	0.11392	0.12056	0.15015	0.15068	0.15668	0.1494	0.15418	0.17141	0.13856	0.20553	0.16236	0.15934	0.16229	0.16173
697	0.084725	0.091057	0.087234	0.086509	0.089952	0.090831	0.098413	0.086563	0.087613	0.10202	0.096631	0.088445	0.10557	0.1114	0.11893	0.11098	0.10777	0.11445	0.096724	0.10268	0.11209	0.11827	0.12812	0.10013	0.10341	0.10264	0.13819	0.13531	0.13866	0.22801	0.14209	0.16688	0.12755	0.11331	0.13603	0.11633	0.12307	0.1533	0.15425	0.16057	0.15289	0.1579	0.17612	0.14164	0.21388	0.16656	0.16342	0.16654	0.16586
698	0.086198	0.092952	0.08908	0.088102	0.091727	0.092703	0.10048	0.08807	0.088759	0.10422	0.098817	0.089116	0.10786	0.11376	0.1214	0.11335	0.11007	0.11687	0.098927	0.10494	0.1145	0.12076	0.13079	0.10237	0.10568	0.10489	0.14122	0.1383	0.14176	0.24112	0.14525	0.17138	0.13018	0.11572	0.13885	0.11878	0.12562	0.15655	0.15799	0.16468	0.15655	0.16182	0.1812	0.14483	0.22342	0.17101	0.16774	0.17105	0.17024
699	0.087877	0.094937	0.091026	0.089866	0.093623	0.09467	0.1026	0.089773	0.090205	0.10645	0.10103	0.090224	0.11017	0.11614	0.12391	0.11576	0.1124	0.11933	0.10115	0.10722	0.11694	0.1233	0.13352	0.10462	0.10798	0.10717	0.14436	0.14139	0.14496	0.25739	0.14853	0.17619	0.13287	0.11817	0.14174	0.12127	0.12822	0.15991	0.16192	0.16905	0.16038	0.16596	0.18672	0.14813	0.23452	0.17577	0.17234	0.17587	0.17491
700	0.089701	0.096989	0.093046	0.091753	0.095606	0.09671	0.10477	0.091616	0.091864	0.10871	0.10326	0.091642	0.11252	0.11857	0.12646	0.11821	0.11477	0.12183	0.1034	0.10952	0.11942	0.12589	0.13632	0.10691	0.11031	0.10948	0.1476	0.14459	0.14829	0.27823	0.15193	0.18138	0.13563	0.12066	0.14471	0.12381	0.13087	0.1634	0.16608	0.1737	0.16442	0.17035	0.19278	0.15157	0.2477	0.1809	0.17726	0.18105	0.17992
701	0.091631	0.099093	0.09512	0.093729	0.097656	0.098805	0.10697	0.093562	0.093676	0.11101	0.10552	0.093282	0.11489	0.12103	0.12907	0.1207	0.11717	0.12438	0.10568	0.11186	0.12195	0.12852	0.13918	0.10922	0.11267	0.11181	0.15097	0.14791	0.15175	0.30582	0.15548	0.18701	0.13845	0.1232	0.14776	0.1264	0.13359	0.16702	0.17049	0.17871	0.16871	0.17506	0.1995	0.15516	0.26378	0.18645	0.18257	0.18668	0.18534
702	0.093638	0.10124	0.097239	0.095771	0.099758	0.10095	0.10921	0.095585	0.095599	0.11333	0.10781	0.095082	0.1173	0.12353	0.13173	0.12324	0.11961	0.12698	0.10798	0.11423	0.12453	0.13122	0.14213	0.11156	0.11506	0.11418	0.15447	0.15136	0.15536	0.34364	0.15918	0.19318	0.14135	0.12578	0.15092	0.12904	0.13637	0.17079	0.17521	0.18413	0.17328	0.18012	0.20707	0.15893	0.28394	0.19254	0.18834	0.19284	0.19126
703	0.095703	0.10342	0.099392	0.097865	0.1019	0.10312	0.11149	0.097665	0.097605	0.11569	0.11012	0.096999	0.11974	0.12608	0.13445	0.12582	0.12209	0.12963	0.11031	0.11663	0.12716	0.13398	0.14516	0.11393	0.11749	0.11658	0.15814	0.15496	0.15915	0.397	0.16307	0.20004	0.14433	0.12842	0.15418	0.13175	0.13922	0.17473	0.1803	0.19005	0.17818	0.18563	0.21571	0.16288	0.30999	0.1993	0.19468	0.19967	0.19779
704	0.097813	0.10564	0.10158	0.099999	0.10408	0.10534	0.1138	0.099791	0.099673	0.11809	0.11246	0.099003	0.12223	0.12868	0.13724	0.12846	0.12462	0.13235	0.11267	0.11907	0.12985	0.13681	0.14829	0.11634	0.11996	0.11901	0.16197	0.15872	0.16313	0.4733	0.16718	0.20777	0.1474	0.13111	0.15755	0.13452	0.14215	0.17886	0.18582	0.19659	0.18348	0.19167	0.22576	0.16707	0.34458	0.20691	0.20172	0.20734	0.20511
705	0.099959	0.10788	0.10379	0.10217	0.10629	0.10758	0.11614	0.10196	0.10179	0.12052	0.11483	0.10107	0.12475	0.13134	0.14009	0.13116	0.12719	0.13513	0.11506	0.12154	0.1326	0.13972	0.15153	0.11878	0.12247	0.12148	0.16602	0.16269	0.16734	0.57963	0.17152	0.21662	0.15058	0.13387	0.16106	0.13735	0.14516	0.1832	0.19188	0.20387	0.18927	0.19837	0.23764	0.17151	0.39132	0.21563	0.20966	0.21609	0.21341
706	0.10214	0.11016	0.10603	0.10437	0.10853	0.10985	0.11851	0.10415	0.10395	0.12299	0.11724	0.10319	0.12733	0.13405	0.14302	0.13393	0.12982	0.13798	0.11748	0.12407	0.13543	0.14271	0.15488	0.12127	0.12503	0.124	0.17029	0.16687	0.17182	0.71275	0.17615	0.22696	0.15386	0.1367	0.16471	0.14027	0.14827	0.18779	0.1986	0.21211	0.19566	0.20591	0.25196	0.17627	0.45435	0.2258	0.21874	0.22625	0.22299
707	0.10434	0.11247	0.1083	0.10659	0.1108	0.11216	0.12093	0.10638	0.10614	0.1255	0.11968	0.10536	0.12996	0.13682	0.14604	0.13676	0.1325	0.14091	0.11995	0.12663	0.13832	0.14579	0.15836	0.12379	0.12764	0.12656	0.17483	0.1713	0.1766	0.84242	0.18111	0.23926	0.15726	0.13961	0.16851	0.14327	0.15148	0.19265	0.20615	0.22154	0.2028	0.21451	0.26957	0.18138	0.53657	0.2379	0.22932	0.23825	0.23424
708	0.10658	0.1148	0.11059	0.10885	0.1131	0.11449	0.12338	0.10864	0.10837	0.12806	0.12217	0.10756	0.13264	0.13966	0.14915	0.13967	0.13525	0.14393	0.12245	0.12925	0.1413	0.14897	0.16198	0.12637	0.1303	0.12917	0.17968	0.17602	0.18174	0.92052	0.18647	0.2542	0.16079	0.14259	0.1725	0.14637	0.1548	0.19784	0.21476	0.23251	0.21089	0.22449	0.2916	0.18692	0.63534	0.25261	0.2419	0.25274	0.24772
709	0.10884	0.11717	0.11291	0.11113	0.11543	0.11686	0.12587	0.11093	0.11062	0.13067	0.12469	0.1098	0.13538	0.14258	0.15236	0.14266	0.13806	0.14704	0.12501	0.13193	0.14437	0.15227	0.16577	0.12899	0.13303	0.13184	0.1849	0.18109	0.1873	0.93054	0.19232	0.27267	0.16448	0.14568	0.1767	0.14956	0.15826	0.2034	0.22473	0.24549	0.2202	0.23627	0.31956	0.19298	0.73663	0.27083	0.25717	0.27057	0.26419
710	0.11112	0.11958	0.11527	0.11344	0.11779	0.11926	0.12841	0.11325	0.1129	0.13334	0.12727	0.11207	0.13819	0.14558	0.15568	0.14575	0.14094	0.15026	0.12761	0.13466	0.14754	0.15568	0.16973	0.13167	0.13582	0.13457	0.19054	0.18656	0.19337	0.89759	0.19875	0.29588	0.16834	0.14886	0.18113	0.15287	0.16185	0.20941	0.23651	0.26111	0.23111	0.25043	0.35531	0.19967	0.81577	0.29379	0.27611	0.29298	0.28475
711	0.11344	0.12202	0.11765	0.11579	0.12018	0.1217	0.131	0.11559	0.11522	0.13606	0.12989	0.11437	0.14107	0.14867	0.15912	0.14894	0.14391	0.15359	0.13027	0.13746	0.15082	0.15924	0.17391	0.13442	0.13868	0.13736	0.1967	0.19251	0.20006	0.84647	0.20592	0.32544	0.17239	0.15216	0.18583	0.15631	0.1656	0.21596	0.25067	0.28024	0.24414	0.26778	0.40087	0.20711	0.85358	0.32314	0.30016	0.32165	0.31093
712	0.11578	0.1245	0.12007	0.11816	0.12261	0.12418	0.13363	0.11798	0.11756	0.13885	0.13257	0.1167	0.14403	0.15186	0.16271	0.15224	0.14696	0.15706	0.13298	0.14034	0.15422	0.16295	0.17832	0.13723	0.14162	0.14023	0.20349	0.19904	0.20749	0.78758	0.21401	0.3634	0.17666	0.15558	0.19084	0.15989	0.16954	0.22314	0.26806	0.30405	0.26003	0.28939	0.45789	0.21551	0.85071	0.36104	0.33135	0.35891	0.34484
713	0.11816	0.12703	0.12253	0.12057	0.12508	0.1267	0.13632	0.12039	0.11994	0.1417	0.13532	0.11906	0.14708	0.15516	0.16645	0.15566	0.15011	0.16066	0.13576	0.14329	0.15775	0.16683	0.183	0.14011	0.14464	0.14317	0.21103	0.20627	0.21584	0.72542	0.22327	0.41237	0.18118	0.15914	0.19623	0.16364	0.17368	0.23112	0.28983	0.33407	0.27981	0.31671	0.52669	0.2251	0.82107	0.41025	0.37258	0.40777	0.38928
714	0.12057	0.1296	0.12503	0.12301	0.12759	0.12927	0.13908	0.12285	0.12236	0.14463	0.13812	0.12146	0.15022	0.15859	0.17036	0.15923	0.15336	0.16443	0.13861	0.14633	0.16144	0.17091	0.18799	0.14307	0.14776	0.14619	0.2195	0.21437	0.22535	0.66233	0.23405	0.47516	0.18601	0.16287	0.20205	0.16756	0.17807	0.24008	0.31761	0.37223	0.30496	0.35166	0.60445	0.23621	0.77718	0.47379	0.42779	0.47168	0.44756
715	0.12301	0.13222	0.12757	0.12549	0.13014	0.13189	0.14189	0.12534	0.12481	0.14765	0.141	0.1239	0.15347	0.16214	0.17448	0.16295	0.15674	0.16839	0.14154	0.14946	0.16529	0.17521	0.19335	0.14612	0.15098	0.14931	0.22914	0.22354	0.23633	0.59937	0.24688	0.55351	0.19118	0.16677	0.20841	0.17169	0.18273	0.25027	0.35367	0.42075	0.33755	0.39667	0.6832	0.24928	0.72614	0.55365	0.50149	0.55312	0.52247
716	0.1255	0.13489	0.13016	0.12802	0.13274	0.13456	0.14478	0.12788	0.1273	0.15075	0.14396	0.12638	0.15683	0.16585	0.17881	0.16685	0.16024	0.17256	0.14454	0.1527	0.16934	0.17976	0.19914	0.14926	0.15433	0.15253	0.24026	0.2341	0.24917	0.53707	0.26247	0.64489	0.19677	0.17089	0.2154	0.17606	0.18771	0.26202	0.40099	0.48169	0.38048	0.45436	0.75015	0.26491	0.67192	0.64727	0.59624	0.64983	0.61333
717	0.12803	0.13763	0.13281	0.13059	0.1354	0.13729	0.14774	0.13047	0.12983	0.15395	0.147	0.1289	0.16032	0.16973	0.18341	0.17096	0.16389	0.17698	0.14764	0.15605	0.1736	0.18461	0.20545	0.15251	0.15779	0.15587	0.25325	0.24641	0.26442	0.47575	0.28189	0.73811	0.20287	0.17524	0.2232	0.18071	0.19308	0.27577	0.46308	0.55565	0.43739	0.52657	0.79251	0.2839	0.61673	0.74272	0.70628	0.74932	0.71118
718	0.1306	0.14042	0.1355	0.13321	0.13811	0.14009	0.15078	0.1331	0.13241	0.15725	0.15014	0.13146	0.16396	0.1738	0.18831	0.17529	0.1677	0.18167	0.15084	0.15953	0.1781	0.1898	0.21239	0.15588	0.16141	0.15933	0.26862	0.26101	0.28278	0.41572	0.30671	0.8127	0.20957	0.17987	0.23198	0.18568	0.19892	0.29213	0.54264	0.63916	0.51193	0.61193	0.80517	0.30731	0.56181	0.81826	0.80963	0.8281	0.79589
719	0.13322	0.14328	0.13826	0.13588	0.14087	0.14295	0.15391	0.13579	0.13503	0.16068	0.15338	0.13407	0.16775	0.17809	0.19356	0.1799	0.1717	0.18671	0.15416	0.16316	0.18289	0.1954	0.22007	0.15938	0.16518	0.16293	0.28706	0.27861	0.30519	0.35743	0.33914	0.85064	0.21703	0.18483	0.24201	0.19104	0.20533	0.31184	0.63806	0.72167	0.60491	0.7021	0.79241	0.33651	0.50786	0.85526	0.8754	0.86601	0.84574
720	0.1359	0.14622	0.14108	0.13861	0.14371	0.14588	0.15714	0.13854	0.13771	0.16424	0.15673	0.13673	0.17173	0.18263	0.19922	0.18481	0.17592	0.19214	0.15759	0.16695	0.188	0.20147	0.22868	0.16302	0.16914	0.16669	0.30943	0.30021	0.33284	0.30169	0.38231	0.85019	0.22541	0.19017	0.25362	0.19686	0.21243	0.33578	0.73744	0.78657	0.70825	0.78016	0.76248	0.37322	0.45521	0.85289	0.89002	0.8627	0.85428
721	0.13863	0.14924	0.14398	0.1414	0.14661	0.1489	0.16047	0.14136	0.14045	0.16794	0.16021	0.13945	0.17591	0.18746	0.20538	0.1901	0.18037	0.19804	0.16116	0.17091	0.19349	0.20812	0.23844	0.16682	0.17331	0.17062	0.33687	0.32716	0.36726	0.24978	0.44008	0.82273	0.23493	0.19599	0.26722	0.20324	0.22038	0.36486	0.81751	0.82042	0.80022	0.82811	0.72202	0.41947	0.40402	0.8236	0.86645	0.83205	0.83179
722	0.14143	0.15234	0.14695	0.14426	0.14959	0.152	0.16392	0.14424	0.14324	0.1718	0.16382	0.14222	0.18032	0.19263	0.21213	0.19581	0.18511	0.20449	0.16488	0.17509	0.19942	0.21546	0.24963	0.17081	0.17771	0.17476	0.37082	0.36132	0.41031	0.20344	0.51621	0.7799	0.24583	0.20236	0.28325	0.21027	0.22938	0.39973	0.85753	0.82173	0.85516	0.83933	0.67542	0.47724	0.35446	0.77933	0.82281	0.78666	0.79137
723	0.14429	0.15554	0.15	0.14719	0.15265	0.15519	0.1675	0.14719	0.1461	0.17585	0.1676	0.14506	0.185	0.1982	0.21961	0.20204	0.19017	0.21162	0.16876	0.1795	0.20589	0.22365	0.26265	0.175	0.18239	0.17912	0.41301	0.40515	0.46396	0.16444	0.61107	0.72894	0.25838	0.20942	0.30224	0.2181	0.23966	0.44041	0.856	0.79857	0.86463	0.82087	0.62533	0.54741	0.3069	0.7272	0.76949	0.73375	0.74145
724	0.14723	0.15884	0.15314	0.15019	0.15579	0.15849	0.17121	0.15023	0.14904	0.1801	0.17154	0.14797	0.19	0.20424	0.22799	0.20887	0.19561	0.21952	0.17284	0.18418	0.21299	0.23291	0.27802	0.17942	0.18738	0.18374	0.46522	0.46158	0.52954	0.1338	0.71521	0.67388	0.27284	0.2173	0.32468	0.22688	0.2515	0.48585	0.82618	0.7602	0.84037	0.78375	0.5733	0.62753	0.26207	0.67116	0.71162	0.67722	0.6867
725	0.15024	0.16225	0.15639	0.15328	0.15904	0.1619	0.17509	0.15336	0.15205	0.18459	0.17568	0.15095	0.19536	0.21086	0.23751	0.21642	0.20148	0.22836	0.17713	0.18917	0.22087	0.2435	0.29644	0.18411	0.19273	0.18865	0.52847	0.5331	0.60592	0.11126	0.80555	0.61699	0.28952	0.22619	0.35102	0.23679	0.26521	0.53368	0.78087	0.71303	0.79737	0.73605	0.52028	0.70875	0.22105	0.61338	0.6519	0.61919	0.62971
726	0.15334	0.16579	0.15974	0.15647	0.16239	0.16543	0.17913	0.15658	0.15514	0.18934	0.18004	0.15402	0.20116	0.21819	0.24846	0.22483	0.20786	0.2383	0.18167	0.19452	0.22971	0.25579	0.31875	0.1891	0.1985	0.19392	0.60123	0.6192	0.68668	0.095506	0.85736	0.5595	0.30873	0.23633	0.38164	0.24805	0.2812	0.58024	0.72754	0.66101	0.7448	0.68261	0.46691	0.77588	0.18505	0.55507	0.59173	0.56079	0.57192
727	0.15653	0.16946	0.1632	0.15975	0.16586	0.1691	0.18337	0.1599	0.15832	0.19439	0.18465	0.15716	0.20748	0.22638	0.26125	0.23427	0.21485	0.24955	0.18648	0.20029	0.23975	0.27026	0.34598	0.19445	0.20477	0.19959	0.67692	0.71163	0.75855	0.08489	0.86428	0.50211	0.33079	0.24801	0.41672	0.26093	0.29991	0.62104	0.67018	0.60645	0.68743	0.62621	0.41374	0.81451	0.15508	0.4969	0.53181	0.50267	0.51409
728	0.15982	0.17329	0.1668	0.16314	0.16945	0.17292	0.18783	0.16334	0.16159	0.19978	0.18954	0.16041	0.21444	0.23567	0.27637	0.24497	0.22255	0.2624	0.1916	0.20655	0.25129	0.28751	0.37908	0.20021	0.21162	0.20574	0.74303	0.79181	0.80617	0.077983	0.83889	0.4453	0.35603	0.26164	0.45603	0.27577	0.32193	0.65176	0.61098	0.55073	0.62782	0.56842	0.36135	0.82067	0.13145	0.43938	0.47259	0.44524	0.45676
729	0.16322	0.17728	0.17054	0.16665	0.17318	0.17691	0.19253	0.1669	0.16498	0.20557	0.19476	0.16375	0.22219	0.24631	0.29443	0.2572	0.23111	0.27717	0.1971	0.21339	0.26473	0.30826	0.41872	0.20646	0.21917	0.21246	0.78595	0.83945	0.82183	0.073706	0.79572	0.38951	0.38468	0.27772	0.49868	0.293	0.34787	0.66954	0.55113	0.4947	0.56738	0.51017	0.31058	0.80095	0.11371	0.38298	0.41441	0.38891	0.40036
730	0.16674	0.18145	0.17444	0.1703	0.17706	0.18107	0.1975	0.1706	0.16847	0.21183	0.20036	0.16721	0.2309	0.25868	0.31617	0.27135	0.24071	0.29427	0.20303	0.22093	0.28058	0.33337	0.46485	0.21329	0.22756	0.21987	0.7993	0.84782	0.80917	0.071294	0.74337	0.33533	0.41684	0.29696	0.54281	0.31313	0.37839	0.67367	0.49137	0.43898	0.50691	0.45214	0.26256	0.76468	0.10089	0.32837	0.35776	0.33427	0.34548
731	0.1704	0.18583	0.17852	0.17408	0.18111	0.18545	0.20279	0.17444	0.17209	0.21864	0.20641	0.17078	0.24083	0.27321	0.34242	0.28786	0.25158	0.31423	0.20946	0.22931	0.2995	0.3638	0.51627	0.22081	0.23697	0.22811	0.78649	0.82571	0.77722	0.070206	0.68631	0.28368	0.45231	0.32025	0.58552	0.33678	0.41406	0.66535	0.43223	0.38414	0.44698	0.3949	0.21877	0.71878	0.091898	0.27655	0.30341	0.28224	0.29298
732	0.1742	0.19045	0.18279	0.17803	0.18535	0.19005	0.20843	0.17846	0.17585	0.22611	0.21298	0.17449	0.25229	0.2905	0.37413	0.30736	0.26403	0.33763	0.2165	0.23874	0.32236	0.4006	0.57029	0.22918	0.24764	0.2374	0.7556	0.7857	0.73378	0.070064	0.62703	0.23589	0.49041	0.34874	0.62307	0.36464	0.45513	0.64687	0.37432	0.33089	0.38817	0.33921	0.18076	0.66748	0.085784	0.22895	0.25257	0.23417	0.24413
733	0.17815	0.19532	0.18728	0.18215	0.1898	0.19492	0.2145	0.18265	0.17976	0.23436	0.22018	0.17833	0.26573	0.31132	0.41228	0.33059	0.27845	0.36517	0.22427	0.24946	0.35024	0.44468	0.62256	0.23859	0.25988	0.24798	0.71371	0.73613	0.68383	0.070598	0.56688	0.19361	0.52986	0.38383	0.65176	0.39745	0.5012	0.62071	0.31846	0.28023	0.33124	0.28613	0.14969	0.61328	0.081796	0.18727	0.20689	0.19174	0.20058
734	0.18229	0.2005	0.19202	0.18646	0.19449	0.20008	0.22105	0.18705	0.18383	0.24358	0.22814	0.18234	0.28174	0.33668	0.45761	0.3585	0.29534	0.39755	0.23293	0.26181	0.38451	0.49639	0.66763	0.2493	0.27411	0.26021	0.66544	0.68153	0.63033	0.071618	0.50664	0.1583	0.56857	0.42705	0.669	0.43579	0.55063	0.58906	0.26589	0.23353	0.27736	0.23713	0.12577	0.55769	0.079384	0.1529	0.16807	0.15645	0.16387
735	0.18662	0.20601	0.19704	0.191	0.19944	0.20557	0.22817	0.19167	0.18809	0.25397	0.23703	0.18652	0.30114	0.36779	0.5101	0.39215	0.31532	0.43539	0.24268	0.27622	0.42666	0.55482	0.70036	0.26166	0.29084	0.27456	0.6138	0.62464	0.57518	0.072981	0.44689	0.13072	0.60391	0.47966	0.67384	0.47989	0.60037	0.5537	0.21823	0.19235	0.2281	0.19394	0.10837	0.50165	0.078134	0.12641	0.13723	0.129	0.13491
736	0.19118	0.21192	0.20238	0.19578	0.2047	0.21145	0.23598	0.19655	0.19254	0.26582	0.24707	0.19088	0.32503	0.40607	0.56812	0.43259	0.3392	0.47889	0.25382	0.29328	0.47798	0.61664	0.71755	0.27613	0.31079	0.29167	0.56053	0.5669	0.51944	0.074589	0.38819	0.11045	0.633	0.54178	0.66704	0.5291	0.64577	0.51602	0.17728	0.1581	0.18527	0.15809	0.096245	0.44581	0.077752	0.10719	0.11431	0.10892	0.11345
737	0.19598	0.21828	0.20809	0.20084	0.2103	0.21779	0.24461	0.20171	0.19722	0.2795	0.25855	0.19546	0.35488	0.45277	0.62737	0.48053	0.36791	0.52743	0.26671	0.31376	0.53861	0.67541	0.71893	0.29334	0.33485	0.31241	0.50673	0.50912	0.46379	0.076372	0.33133	0.096265	0.65339	0.61063	0.65054	0.58125	0.68158	0.47707	0.14433	0.13137	0.15036	0.13027	0.088085	0.39075	0.078025	0.093861	0.098157	0.094926	0.098336
738	0.20105	0.22517	0.21422	0.20621	0.21631	0.22464	0.25424	0.2072	0.20216	0.29548	0.27188	0.20027	0.39253	0.5084	0.68095	0.53565	0.40244	0.57899	0.28186	0.33867	0.6062	0.72276	0.70651	0.31415	0.36415	0.33793	0.45313	0.45189	0.40882	0.078278	0.27745	0.086691	0.66366	0.67923	0.62653	0.63236	0.70358	0.4377	0.11959	0.11174	0.12383	0.11	0.082818	0.33716	0.078788	0.084944	0.087217	0.085514	0.088083
739	0.20645	0.2327	0.22084	0.21195	0.22277	0.23211	0.26508	0.21306	0.20737	0.31434	0.28758	0.20535	0.44001	0.57152	0.72094	0.59553	0.44366	0.62963	0.29998	0.36928	0.67417	0.75144	0.68338	0.33969	0.40004	0.36974	0.40032	0.3957	0.35512	0.080271	0.22816	0.080463	0.66368	0.7365	0.59705	0.67673	0.71002	0.39863	0.10203	0.097978	0.10484	0.095924	0.079645	0.286	0.079918	0.079202	0.080049	0.079413	0.081368
740	0.21221	0.24097	0.22804	0.2181	0.22979	0.24032	0.27742	0.21935	0.21291	0.33683	0.30637	0.21071	0.49891	0.63732	0.74173	0.65471	0.4918	0.67381	0.32201	0.40706	0.73207	0.75866	0.65248	0.37146	0.44386	0.40962	0.34889	0.34116	0.30351	0.082329	0.18529	0.076633	0.65437	0.77185	0.56375	0.7086	0.70183	0.36049	0.090089	0.08868	0.09185	0.0865	0.077985	0.23862	0.081325	0.075732	0.075573	0.075681	0.07719
741	0.21838	0.25015	0.23594	0.22473	0.23744	0.2494	0.2916	0.22612	0.21881	0.36377	0.32923	0.2164	0.56891	0.6974	0.7422	0.70524	0.5458	0.70579	0.34925	0.45343	0.76961	0.74651	0.6161	0.41123	0.49655	0.45939	0.29958	0.28914	0.25512	0.084432	0.15036	0.074515	0.63718	0.78062	0.52787	0.72414	0.68154	0.32387	0.082233	0.082633	0.083257	0.080421	0.07741	0.19659	0.082936	0.073877	0.073005	0.073636	0.074822
742	0.22504	0.26042	0.24465	0.23193	0.24587	0.25955	0.30806	0.23347	0.22512	0.39605	0.35742	0.22246	0.64527	0.74181	0.72548	0.73915	0.60239	0.72177	0.38339	0.50916	0.78188	0.7199	0.57592	0.46088	0.55764	0.52009	0.25344	0.24091	0.21141	0.086571	0.1238	0.073625	0.61369	0.76586	0.49034	0.72289	0.65215	0.28933	0.077285	0.078926	0.077793	0.076726	0.077619	0.16137	0.084701	0.07318	0.071803	0.072802	0.073752
743	0.23227	0.27201	0.25436	0.23979	0.25521	0.27098	0.32733	0.24148	0.23191	0.43446	0.39257	0.22895	0.71725	0.76369	0.69621	0.75218	0.65584	0.72114	0.42648	0.57313	0.7712	0.68358	0.53319	0.52155	0.62385	0.59034	0.21178	0.19805	0.17389	0.088738	0.10478	0.073615	0.58534	0.73443	0.45183	0.70713	0.61625	0.25739	0.074402	0.076899	0.074547	0.074728	0.078391	0.1337	0.086583	0.073311	0.071577	0.072834	0.073612
744	0.24016	0.28524	0.26528	0.24846	0.26568	0.28399	0.35002	0.25029	0.23925	0.47931	0.43652	0.23591	0.77067	0.76214	0.65847	0.74511	0.69901	0.70605	0.48059	0.64087	0.74388	0.64108	0.48881	0.59208	0.68805	0.66428	0.17597	0.16207	0.14365	0.09093	0.091775	0.074234	0.5533	0.69266	0.41287	0.68032	0.57583	0.22854	0.072981	0.076072	0.07287	0.073937	0.079566	0.11327	0.088555	0.074034	0.072047	0.073486	0.074137
745	0.24884	0.30047	0.2777	0.25807	0.27752	0.29893	0.37679	0.26003	0.24724	0.52991	0.49092	0.24342	0.79535	0.74157	0.61519	0.72236	0.72591	0.67997	0.54664	0.70348	0.70614	0.59472	0.44353	0.66652	0.74001	0.7305	0.14692	0.13377	0.12073	0.093143	0.083168	0.075305	0.51855	0.64467	0.37392	0.64572	0.53239	0.20316	0.072607	0.076109	0.072314	0.074009	0.081031	0.0989	0.090596	0.075181	0.073017	0.074582	0.07514
746	0.25848	0.31817	0.29196	0.26885	0.29104	0.31625	0.4083	0.27091	0.25599	0.5839	0.55601	0.25156	0.79065	0.70774	0.56834	0.68882	0.73402	0.64612	0.62226	0.75017	0.66219	0.54608	0.39799	0.7335	0.77075	0.77612	0.12472	0.11286	0.10428	0.095378	0.077695	0.0767	0.48183	0.59301	0.3355	0.60587	0.48704	0.18151	0.072977	0.076763	0.072556	0.074695	0.082704	0.08917	0.092695	0.07663	0.074344	0.075996	0.076485
747	0.26927	0.33892	0.30855	0.28105	0.30664	0.33648	0.44496	0.28315	0.26564	0.63674	0.62863	0.26044	0.76364	0.66538	0.51926	0.64835	0.72472	0.60703	0.69924	0.77301	0.61457	0.49625	0.35285	0.77973	0.77679	0.79333	0.10861	0.098166	0.09296	0.097635	0.074436	0.078325	0.44378	0.5393	0.29818	0.56261	0.44063	0.16359	0.073877	0.077859	0.073364	0.075819	0.084527	0.082821	0.094841	0.078296	0.075924	0.077637	0.078073
748	0.28149	0.36336	0.32805	0.29501	0.32483	0.36026	0.48662	0.29707	0.27638	0.68195	0.69987	0.27018	0.72286	0.61759	0.46894	0.6035	0.70179	0.56445	0.76336	0.77114	0.56483	0.44597	0.30888	0.79747	0.76133	0.78375	0.097373	0.088213	0.085438	0.099915	0.072755	0.080116	0.40492	0.48461	0.26268	0.51718	0.3939	0.14916	0.075156	0.079272	0.074579	0.077255	0.086459	0.078908	0.097029	0.080115	0.077686	0.07944	0.079836
749	0.29545	0.39219	0.3512	0.31115	0.34619	0.38825	0.53213	0.31304	0.28842	0.71316	0.7567	0.28092	0.67417	0.56644	0.41815	0.55599	0.66913	0.51964	0.80118	0.74928	0.514	0.39586	0.267	0.78802	0.7304	0.75455	0.089807	0.081711	0.080663	0.10222	0.072194	0.082026	0.36577	0.42978	0.22979	0.47052	0.3476	0.13784	0.076704	0.080911	0.076081	0.078914	0.088472	0.076736	0.099257	0.082046	0.079577	0.08136	0.081724
750	0.31161	0.42605	0.37891	0.33	0.37144	0.42109	0.57889	0.33153	0.30204	0.7264	0.78763	0.29285	0.6209	0.51332	0.36766	0.50697	0.62988	0.4735	0.80756	0.71397	0.46274	0.34658	0.22833	0.75886	0.68963	0.71335	0.084914	0.077677	0.077856	0.10455	0.072429	0.084021	0.32687	0.37557	0.20034	0.42332	0.30258	0.12913	0.078443	0.08271	0.077787	0.08073	0.090545	0.075806	0.10152	0.084056	0.08156	0.083363	0.083702
751	0.33052	0.46529	0.41221	0.35224	0.40132	0.45915	0.62271	0.35314	0.31762	0.72178	0.78985	0.3062	0.56497	0.45924	0.31838	0.45722	0.58623	0.42669	0.788	0.67027	0.41157	0.29895	0.19401	0.7177	0.64276	0.66508	0.081961	0.075416	0.076467	0.10692	0.073234	0.086081	0.28895	0.32287	0.17499	0.37622	0.25993	0.12255	0.080318	0.084625	0.079639	0.08266	0.092666	0.07577	0.10382	0.086126	0.083611	0.085429	0.085747
752	0.3529	0.50963	0.45208	0.37868	0.43652	0.50229	0.65873	0.37855	0.3356	0.70215	0.76842	0.32122	0.50771	0.40504	0.27143	0.4074	0.53973	0.37983	0.75145	0.62149	0.36105	0.25408	0.165	0.66955	0.59219	0.61269	0.080401	0.074417	0.076089	0.10931	0.074444	0.088188	0.25286	0.27288	0.1541	0.3299	0.2209	0.11768	0.082289	0.086623	0.081593	0.084671	0.094825	0.076371	0.10616	0.08824	0.085712	0.087541	0.087841
753	0.37962	0.55771	0.49914	0.4102	0.4774	0.54935	0.6827	0.40857	0.35653	0.67149	0.73161	0.33825	0.45008	0.35164	0.22825	0.35814	0.49147	0.33361	0.70531	0.56964	0.31192	0.21334	0.14174	0.6173	0.53945	0.55794	0.079846	0.074321	0.076436	0.11175	0.07594	0.090334	0.21958	0.22709	0.13761	0.28526	0.18677	0.11416	0.08433	0.088681	0.083621	0.08674	0.097018	0.077427	0.10854	0.090389	0.08785	0.089689	0.089974
754	0.41173	0.60647	0.55277	0.44767	0.52348	0.59762	0.69263	0.44394	0.38111	0.63327	0.6857	0.35767	0.39292	0.30013	0.19034	0.31024	0.44227	0.28893	0.6536	0.51603	0.26525	0.17809	0.12396	0.56265	0.48559	0.50201	0.080023	0.074876	0.077305	0.11422	0.077643	0.092511	0.1901	0.18716	0.12506	0.24346	0.15845	0.11173	0.086422	0.090784	0.085702	0.088854	0.099241	0.07881	0.11096	0.092568	0.090019	0.091869	0.092139
755	0.45028	0.65149	0.61036	0.49158	0.57301	0.64299	0.68868	0.48515	0.41007	0.59011	0.63466	0.37995	0.33719	0.25195	0.1589	0.26476	0.39287	0.24691	0.59887	0.46167	0.22239	0.14929	0.111	0.50685	0.43142	0.44578	0.080726	0.075893	0.078544	0.11674	0.079489	0.094715	0.16515	0.15437	0.11588	0.20577	0.13627	0.11017	0.088552	0.092923	0.087823	0.091003	0.10149	0.080424	0.11342	0.094774	0.092215	0.094075	0.094332
756	0.49598	0.68747	0.6664	0.5415	0.6224	0.68036	0.67281	0.53195	0.44415	0.54383	0.58071	0.40557	0.28413	0.20872	0.13438	0.22302	0.34409	0.20887	0.54255	0.40736	0.18483	0.12713	0.10193	0.45074	0.37769	0.39004	0.081811	0.077239	0.080048	0.11931	0.081438	0.096946	0.14506	0.12915	0.10941	0.17342	0.11979	0.10932	0.090712	0.09509	0.089975	0.093181	0.10377	0.082203	0.11594	0.097004	0.094434	0.096306	0.096549
757	0.54856	0.70988	0.71311	0.59522	0.66633	0.70508	0.64775	0.58269	0.48384	0.49569	0.52521	0.43501	0.23535	0.17204	0.11635	0.18643	0.29689	0.17607	0.4856	0.3539	0.15377	0.11099	0.095826	0.39505	0.3253	0.33566	0.083179	0.078822	0.081742	0.12194	0.08346	0.099202	0.12962	0.11091	0.10506	0.14718	0.10812	0.10906	0.092897	0.097284	0.092153	0.095383	0.10608	0.084101	0.1185	0.099258	0.096677	0.098561	0.098792
758	0.60568	0.71648	0.74298	0.64814	0.699	0.71453	0.61604	0.63368	0.52891	0.44662	0.46911	0.46866	0.19264	0.14285	0.10372	0.15612	0.2525	0.14935	0.42875	0.30233	0.12963	0.099721	0.09194	0.34061	0.27542	0.28379	0.084754	0.080574	0.083574	0.12462	0.085535	0.10148	0.11828	0.098324	0.10233	0.12709	0.10017	0.10928	0.095105	0.099503	0.094353	0.097609	0.10843	0.086085	0.12112	0.10154	0.098943	0.10084	0.10106
759	0.662	0.70785	0.75203	0.69355	0.71609	0.70878	0.57965	0.67921	0.57775	0.39741	0.4132	0.50655	0.1575	0.12107	0.095211	0.1325	0.21237	0.1288	0.37275	0.25398	0.11192	0.092153	0.089694	0.28851	0.22954	0.23594	0.086485	0.08245	0.085506	0.12737	0.087651	0.10379	0.11027	0.089968	0.10084	0.11247	0.095	0.10991	0.097336	0.10175	0.096575	0.099859	0.1108	0.088134	0.1238	0.10384	0.10123	0.10315	0.10335
760	0.70962	0.68658	0.74115	0.72458	0.71629	0.69008	0.53996	0.71292	0.6268	0.34885	0.3583	0.54801	0.1305	0.10569	0.089716	0.11509	0.17786	0.1138	0.31852	0.21049	0.099503	0.087287	0.088654	0.24025	0.18934	0.19385	0.088333	0.084415	0.087513	0.1302	0.089798	0.10613	0.10487	0.08464	0.10028	0.10228	0.091865	0.11087	0.099589	0.10402	0.098818	0.10213	0.11321	0.090231	0.12655	0.10618	0.10355	0.10549	0.10568
761	0.74061	0.65587	0.7147	0.73692	0.70132	0.66152	0.498	0.73009	0.67057	0.30189	0.3054	0.59129	0.11102	0.09528	0.086394	0.10285	0.14986	0.1033	0.26731	0.17343	0.091107	0.084381	0.088495	0.19753	0.15617	0.15898	0.090271	0.086446	0.089577	0.1331	0.091971	0.1085	0.10145	0.081466	0.10043	0.095453	0.090212	0.11211	0.10187	0.10632	0.10108	0.10443	0.11566	0.092367	0.12937	0.10855	0.1059	0.10786	0.10803
762	0.75055	0.6185	0.67771	0.73042	0.6745	0.62591	0.45456	0.7295	0.70291	0.25769	0.25587	0.63317	0.097654	0.088494	0.084637	0.094559	0.12846	0.096233	0.22075	0.1438	0.085652	0.082897	0.08898	0.1619	0.13055	0.13198	0.092279	0.088527	0.091686	0.1361	0.094167	0.11091	0.099512	0.079834	0.10111	0.091102	0.089631	0.11358	0.10417	0.10865	0.10337	0.10676	0.11816	0.094537	0.13227	0.11095	0.10828	0.11026	0.11041
763	0.74017	0.57654	0.63404	0.7083	0.63922	0.58539	0.4103	0.71324	0.71934	0.21758	0.21134	0.66925	0.088811	0.0843	0.084008	0.089179	0.11292	0.091711	0.18058	0.12158	0.082329	0.082443	0.089934	0.13408	0.1119	0.11232	0.094344	0.09065	0.093833	0.1392	0.096384	0.11335	0.098679	0.079305	0.10219	0.088563	0.089827	0.11523	0.1065	0.11102	0.10569	0.10912	0.1207	0.096735	0.13526	0.11338	0.11069	0.1127	0.11284
764	0.71366	0.53149	0.58621	0.67483	0.59813	0.54154	0.36595	0.685	0.71851	0.18289	0.17342	0.695	0.083187	0.081946	0.084182	0.085908	0.10213	0.089042	0.14805	0.10583	0.080548	0.082728	0.091227	0.11371	0.098993	0.098732	0.096456	0.092806	0.096013	0.1424	0.098623	0.11584	0.09866	0.07956	0.10357	0.087338	0.090581	0.11705	0.10886	0.11343	0.10804	0.11151	0.12329	0.098962	0.13835	0.11586	0.11314	0.11518	0.1153
765	0.67617	0.48445	0.53581	0.63381	0.55313	0.49548	0.32228	0.64847	0.7022	0.15451	0.14316	0.70712	0.07983	0.080905	0.084931	0.084162	0.094922	0.087721	0.12344	0.095125	0.079883	0.083546	0.09277	0.099559	0.090394	0.089689	0.098611	0.094991	0.098224	0.14573	0.10088	0.11837	0.099241	0.080372	0.10518	0.087065	0.091738	0.119	0.11125	0.11588	0.11042	0.11395	0.12594	0.10122	0.14155	0.11839	0.11564	0.11771	0.1178
766	0.63178	0.43629	0.48393	0.58791	0.50558	0.4481	0.28028	0.60644	0.67392	0.13261	0.12054	0.70466	0.078081	0.080798	0.08609	0.083518	0.090328	0.087377	0.1059	0.088122	0.080022	0.084747	0.094496	0.090096	0.084893	0.083897	0.1008	0.097205	0.10046	0.1492	0.10317	0.12095	0.10026	0.081581	0.10696	0.087479	0.093186	0.12107	0.11368	0.11838	0.11283	0.11642	0.12865	0.1035	0.14487	0.12096	0.11818	0.12029	0.12036
767	0.5831	0.3878	0.43145	0.53887	0.45651	0.40017	0.24109	0.56078	0.63723	0.11659	0.10457	0.68893	0.077476	0.081355	0.087541	0.083669	0.087628	0.08774	0.093961	0.083757	0.080739	0.086225	0.096359	0.083997	0.081595	0.080406	0.10303	0.099446	0.10273	0.15283	0.10548	0.12359	0.10161	0.083072	0.10888	0.088388	0.094846	0.12323	0.11616	0.12093	0.11528	0.11893	0.13144	0.10581	0.14832	0.12359	0.12077	0.12292	0.12296
768	0.53176	0.33985	0.37917	0.48793	0.40679	0.35249	0.20592	0.51278	0.59485	0.10537	0.093755	0.66262	0.077685	0.082384	0.089204	0.084392	0.086298	0.088612	0.08611	0.081273	0.081872	0.087903	0.098325	0.080286	0.079875	0.078554	0.1053	0.10171	0.10503	0.15664	0.10782	0.12629	0.10321	0.084765	0.11091	0.089657	0.096663	0.12549	0.11868	0.12354	0.11778	0.1215	0.13429	0.10815	0.15192	0.12628	0.12342	0.12562	0.12563
769	0.47891	0.29344	0.32802	0.43605	0.35733	0.30601	0.17583	0.46337	0.54871	0.097805	0.086691	0.62851	0.07847	0.083747	0.09102	0.085526	0.085955	0.089853	0.081157	0.080131	0.083304	0.089727	0.10037	0.078271	0.07928	0.07787	0.1076	0.10401	0.10737	0.16066	0.11018	0.12905	0.10499	0.086603	0.11303	0.091185	0.098598	0.12783	0.12124	0.12621	0.12032	0.12412	0.13723	0.11053	0.15569	0.12903	0.12613	0.12838	0.12835
770	0.42546	0.24982	0.27914	0.38412	0.30913	0.26187	0.15139	0.41337	0.50013	0.092927	0.082287	0.58896	0.079662	0.085348	0.092946	0.086956	0.086321	0.09136	0.078257	0.079948	0.084951	0.091659	0.10249	0.077467	0.079486	0.078016	0.10993	0.10634	0.10974	0.16491	0.11259	0.13189	0.1069	0.088546	0.11523	0.092902	0.10062	0.13026	0.12387	0.12895	0.12292	0.1268	0.14026	0.11295	0.15966	0.13186	0.1289	0.13121	0.13115
771	0.37232	0.21043	0.23398	0.33309	0.26345	0.22145	0.13256	0.36355	0.45014	0.089993	0.079773	0.54567	0.081142	0.087118	0.094956	0.0886	0.087196	0.093062	0.076821	0.080446	0.086753	0.093672	0.10465	0.077528	0.080264	0.078753	0.11231	0.1087	0.11214	0.16943	0.11502	0.13481	0.10893	0.090566	0.11749	0.09476	0.10272	0.13275	0.12655	0.13177	0.12557	0.12955	0.14339	0.1154	0.16384	0.13476	0.13176	0.13412	0.13402
772	0.32049	0.17661	0.19414	0.28415	0.22176	0.18614	0.1187	0.31484	0.39963	0.088468	0.078608	0.49991	0.082827	0.089011	0.09703	0.0904	0.088436	0.094909	0.076431	0.08143	0.08867	0.095748	0.10687	0.078204	0.081448	0.079909	0.11473	0.1111	0.11459	0.17428	0.1175	0.13782	0.11105	0.092645	0.11982	0.096724	0.10487	0.13533	0.1293	0.13466	0.12828	0.13237	0.14663	0.1179	0.16826	0.13776	0.13469	0.13713	0.13698
773	0.27127	0.14922	0.16099	0.23878	0.18554	0.15698	0.10891	0.26842	0.34952	0.087962	0.078409	0.45261	0.084659	0.090993	0.099154	0.092315	0.089939	0.096863	0.076788	0.082759	0.090671	0.097875	0.10912	0.079317	0.082922	0.081363	0.11719	0.11353	0.11708	0.17952	0.12003	0.14093	0.11325	0.09477	0.12221	0.098768	0.10708	0.13797	0.13211	0.13765	0.13107	0.13527	0.15	0.12045	0.17298	0.14085	0.13772	0.14023	0.14003
774	0.22622	0.12837	0.13517	0.1986	0.15589	0.13434	0.10227	0.22573	0.3009	0.088188	0.078891	0.4046	0.086593	0.093041	0.10132	0.094315	0.091632	0.0989	0.077671	0.084332	0.092736	0.10004	0.11142	0.080738	0.0846	0.083027	0.11969	0.11601	0.11961	0.18522	0.1226	0.14415	0.11551	0.096932	0.12466	0.10088	0.10933	0.1407	0.13501	0.14074	0.13392	0.13825	0.15351	0.12305	0.17803	0.14405	0.14085	0.14344	0.14318
775	0.18704	0.11329	0.11622	0.16502	0.13306	0.11768	0.097976	0.18834	0.25511	0.088948	0.079863	0.35665	0.088604	0.09514	0.10352	0.096383	0.093464	0.101	0.078932	0.086081	0.094851	0.10225	0.11376	0.082381	0.086428	0.084843	0.12225	0.11854	0.1222	0.19149	0.12523	0.14749	0.11783	0.099126	0.12716	0.10304	0.11162	0.1435	0.138	0.14393	0.13686	0.14134	0.15718	0.12571	0.18347	0.14737	0.14409	0.14677	0.14645
776	0.15506	0.10284	0.10298	0.13875	0.11646	0.10597	0.095431	0.15749	0.21375	0.090092	0.081181	0.30971	0.09067	0.097279	0.10576	0.098503	0.0954	0.10316	0.080459	0.087957	0.097007	0.10449	0.11614	0.084181	0.088362	0.086766	0.12486	0.12111	0.12485	0.19848	0.12791	0.15097	0.1202	0.10135	0.12972	0.10525	0.11395	0.14638	0.14109	0.14725	0.1399	0.14453	0.16104	0.12843	0.18938	0.15083	0.14746	0.15024	0.14985
777	0.13057	0.095897	0.094081	0.11936	0.10489	0.098064	0.09418	0.13357	0.17834	0.091516	0.082747	0.26497	0.09278	0.099453	0.10803	0.10067	0.097415	0.10536	0.082178	0.089924	0.099199	0.10676	0.11856	0.086093	0.090374	0.088768	0.12753	0.12374	0.12756	0.20637	0.13066	0.15461	0.12263	0.1036	0.13234	0.1075	0.11633	0.14935	0.14428	0.15071	0.14303	0.14785	0.1651	0.13122	0.19586	0.15443	0.15097	0.15387	0.1534
778	0.11288	0.091537	0.088362	0.10574	0.097169	0.09299	0.093873	0.11603	0.14983	0.093145	0.084488	0.22385	0.094922	0.10166	0.11032	0.10287	0.099492	0.10761	0.084031	0.091959	0.10142	0.10907	0.12102	0.088088	0.092446	0.090828	0.13027	0.12643	0.13033	0.21546	0.13348	0.15842	0.12511	0.10589	0.13502	0.10978	0.11874	0.15241	0.1476	0.15433	0.14629	0.1513	0.16941	0.13408	0.20302	0.15822	0.15463	0.15767	0.1571
779	0.10067	0.089045	0.084932	0.096565	0.092277	0.089977	0.094253	0.10376	0.12825	0.094927	0.086355	0.18786	0.097094	0.10389	0.11266	0.10511	0.10162	0.10989	0.085981	0.094046	0.10368	0.11141	0.12353	0.090142	0.094563	0.092932	0.13307	0.12918	0.13319	0.22614	0.13638	0.16243	0.12765	0.1082	0.13778	0.11211	0.1212	0.15557	0.15105	0.15812	0.14967	0.1549	0.174	0.13703	0.21106	0.1622	0.15848	0.16167	0.161
780	0.09258	0.087893	0.08313	0.090663	0.089423	0.088447	0.095133	0.095526	0.11274	0.096824	0.088313	0.15813	0.099291	0.10615	0.11502	0.10739	0.10379	0.11222	0.088002	0.096175	0.10596	0.11378	0.12609	0.092242	0.096717	0.095071	0.13596	0.13201	0.13612	0.23902	0.13936	0.16668	0.13025	0.11054	0.1406	0.11448	0.12371	0.15884	0.15466	0.16212	0.15319	0.15869	0.17895	0.14007	0.22019	0.16641	0.16254	0.1659	0.1651
781	0.087479	0.087697	0.082483	0.08711	0.088025	0.087979	0.096377	0.090265	0.1021	0.098808	0.09034	0.13504	0.10151	0.10844	0.11743	0.1097	0.106	0.11458	0.090076	0.098338	0.10828	0.11619	0.1287	0.094379	0.098903	0.09724	0.13892	0.13492	0.13915	0.25497	0.14244	0.1712	0.1329	0.11291	0.1435	0.11689	0.12626	0.16223	0.15844	0.16636	0.15688	0.16268	0.18431	0.14322	0.23077	0.17088	0.16683	0.17039	0.16946
782	0.084504	0.088184	0.082656	0.085226	0.087661	0.088269	0.097887	0.087144	0.095103	0.10086	0.092417	0.11809	0.10376	0.11075	0.11987	0.11204	0.10825	0.11699	0.09219	0.10053	0.11063	0.11865	0.13137	0.096546	0.10112	0.099435	0.14199	0.13792	0.14228	0.27533	0.14562	0.17604	0.13562	0.11532	0.14648	0.11934	0.12887	0.16574	0.16243	0.17088	0.16077	0.16691	0.19017	0.14648	0.24328	0.17567	0.1714	0.1752	0.1741
783	0.083035	0.089157	0.083411	0.084526	0.088033	0.089102	0.099592	0.085554	0.090759	0.10297	0.094535	0.10621	0.10603	0.1131	0.12235	0.11442	0.11054	0.11943	0.094337	0.10275	0.11301	0.12114	0.1341	0.09874	0.10336	0.10166	0.14516	0.14101	0.14552	0.30222	0.14893	0.18126	0.13841	0.11777	0.14955	0.12184	0.13153	0.16938	0.16666	0.17573	0.16487	0.17142	0.19667	0.14988	0.25843	0.18083	0.1763	0.18039	0.17909
784	0.082632	0.090478	0.084578	0.084664	0.088928	0.090321	0.10144	0.085053	0.08831	0.10513	0.096686	0.098259	0.10832	0.11548	0.12487	0.11685	0.11286	0.12193	0.096513	0.105	0.11543	0.12368	0.1369	0.10096	0.10563	0.1039	0.14844	0.14422	0.1489	0.33892	0.15236	0.18695	0.14127	0.12027	0.15272	0.12438	0.13426	0.17319	0.17117	0.18097	0.16923	0.17626	0.20395	0.15342	0.27732	0.18645	0.18159	0.18602	0.1845
785	0.082981	0.092049	0.086038	0.085395	0.090193	0.091819	0.10341	0.085327	0.087207	0.10734	0.098867	0.093196	0.11064	0.1179	0.12745	0.11931	0.11521	0.12447	0.098713	0.10728	0.11789	0.12628	0.13977	0.1032	0.10793	0.10617	0.15186	0.14754	0.15241	0.39052	0.15594	0.19321	0.14422	0.1228	0.15599	0.12698	0.13705	0.17716	0.17601	0.18668	0.17389	0.1815	0.21224	0.15713	0.30158	0.19264	0.18735	0.19221	0.19042
786	0.083863	0.093799	0.087708	0.086547	0.091724	0.093516	0.10546	0.086151	0.087058	0.10958	0.10107	0.09022	0.113	0.12035	0.13008	0.12182	0.11761	0.12707	0.10094	0.10959	0.12039	0.12892	0.14272	0.10547	0.11026	0.10847	0.15543	0.15101	0.15609	0.46418	0.1597	0.20021	0.14725	0.12539	0.15939	0.12964	0.13991	0.18132	0.18124	0.19296	0.17892	0.18723	0.22183	0.16104	0.33361	0.19954	0.19368	0.19909	0.19696
787	0.085121	0.09568	0.089527	0.087997	0.093446	0.095359	0.10757	0.087366	0.087586	0.11186	0.10331	0.088736	0.11538	0.12285	0.13276	0.12438	0.12005	0.12972	0.10319	0.11192	0.12294	0.13163	0.14576	0.10777	0.11263	0.11079	0.15916	0.15463	0.15996	0.56717	0.16364	0.20814	0.15037	0.12803	0.16291	0.13236	0.14286	0.1857	0.18695	0.19995	0.18438	0.19356	0.2331	0.16516	0.37676	0.20736	0.20075	0.20686	0.20431
788	0.086648	0.097659	0.091455	0.089659	0.095304	0.09731	0.10975	0.088861	0.088592	0.11417	0.10557	0.088313	0.1178	0.12539	0.13551	0.127	0.12253	0.13244	0.10546	0.11429	0.12554	0.13441	0.14889	0.1101	0.11502	0.11315	0.16308	0.15842	0.16405	0.698	0.16781	0.2173	0.1536	0.13074	0.16658	0.13515	0.14589	0.19032	0.19326	0.20781	0.19038	0.20063	0.24662	0.16955	0.43502	0.21639	0.20873	0.21575	0.21268
789	0.088364	0.099712	0.093463	0.091473	0.097265	0.099342	0.11197	0.090555	0.089939	0.11653	0.10785	0.088644	0.12026	0.12798	0.13832	0.12967	0.12506	0.13522	0.10776	0.1167	0.1282	0.13725	0.15214	0.11245	0.11746	0.11554	0.16723	0.16242	0.16838	0.82965	0.17225	0.22806	0.15695	0.1335	0.17041	0.13801	0.14902	0.19521	0.20029	0.21678	0.19703	0.20865	0.26311	0.17424	0.51176	0.22699	0.21791	0.22612	0.22237
790	0.090216	0.10182	0.09553	0.093398	0.099301	0.10144	0.11424	0.092394	0.091527	0.11892	0.11017	0.089509	0.12276	0.13062	0.14121	0.1324	0.12764	0.13808	0.11009	0.11914	0.13092	0.14017	0.1555	0.11484	0.11993	0.11796	0.17163	0.16665	0.17301	0.91405	0.17699	0.24094	0.16042	0.13634	0.17442	0.14095	0.15226	0.20043	0.20826	0.22716	0.20452	0.21789	0.2836	0.17929	0.60618	0.2397	0.22865	0.23843	0.23377
791	0.092167	0.10398	0.097645	0.095404	0.1014	0.10358	0.11655	0.094338	0.093289	0.12135	0.11251	0.090755	0.1253	0.13332	0.14417	0.13521	0.13027	0.14102	0.11245	0.12163	0.1337	0.14318	0.15899	0.11727	0.12245	0.12042	0.17632	0.17114	0.17797	0.9303	0.1821	0.25664	0.16404	0.13926	0.17863	0.14398	0.15561	0.20601	0.21742	0.23937	0.21307	0.2287	0.30942	0.18476	0.70771	0.2552	0.24147	0.25334	0.24746
792	0.094191	0.10618	0.099798	0.097471	0.10354	0.10577	0.11891	0.09636	0.095176	0.12383	0.11489	0.092272	0.1279	0.13608	0.14723	0.13808	0.13296	0.14405	0.11485	0.12415	0.13656	0.14628	0.16263	0.11973	0.12501	0.12293	0.18135	0.17595	0.18334	0.90089	0.18765	0.27607	0.16782	0.14226	0.18307	0.14711	0.1591	0.21203	0.22813	0.25397	0.223	0.24159	0.34226	0.19074	0.79405	0.27444	0.25707	0.27174	0.26422
793	0.096269	0.10842	0.10198	0.099587	0.10572	0.108	0.1213	0.098442	0.097156	0.12635	0.1173	0.093983	0.13054	0.13891	0.15038	0.14105	0.13571	0.14717	0.11728	0.12673	0.1395	0.14949	0.16643	0.12224	0.12763	0.12548	0.18679	0.18112	0.18919	0.85126	0.19374	0.30045	0.17177	0.14537	0.18778	0.15034	0.16273	0.21857	0.24089	0.27173	0.23474	0.25723	0.38402	0.19734	0.84316	0.29865	0.27647	0.29487	0.28515
794	0.09839	0.11069	0.1042	0.10174	0.10794	0.11027	0.12374	0.10057	0.099205	0.12892	0.11975	0.095835	0.13325	0.14182	0.15364	0.1441	0.13854	0.1504	0.11975	0.12936	0.14252	0.15282	0.17042	0.12479	0.13031	0.12808	0.19271	0.18672	0.19561	0.79294	0.20049	0.33134	0.17594	0.14857	0.1928	0.1537	0.16653	0.22573	0.25638	0.29368	0.2489	0.27654	0.43643	0.2047	0.8504	0.32949	0.30111	0.32445	0.31178
795	0.10055	0.11299	0.10644	0.10393	0.11019	0.11256	0.12622	0.10274	0.10131	0.13154	0.12224	0.09779	0.13602	0.14481	0.15702	0.14725	0.14144	0.15376	0.12226	0.13205	0.14564	0.15627	0.17462	0.12739	0.13305	0.13073	0.19922	0.19285	0.20274	0.73104	0.20805	0.37079	0.18034	0.1519	0.19817	0.15719	0.17052	0.23365	0.27557	0.32115	0.26632	0.30072	0.50031	0.21299	0.82719	0.36908	0.33307	0.3628	0.34622
796	0.10273	0.11533	0.10872	0.10615	0.11248	0.1149	0.12875	0.10495	0.10345	0.13422	0.12478	0.099822	0.13885	0.1479	0.16054	0.15052	0.14442	0.15725	0.12481	0.1348	0.14887	0.15987	0.17906	0.13005	0.13585	0.13345	0.20643	0.1996	0.21073	0.66802	0.21667	0.42126	0.18501	0.15536	0.20397	0.16084	0.17472	0.24249	0.29978	0.35585	0.2882	0.33143	0.57414	0.22247	0.78675	0.42009	0.37529	0.41289	0.39122
797	0.10495	0.1177	0.11102	0.1084	0.11479	0.11726	0.13132	0.10718	0.10564	0.13696	0.12736	0.10191	0.14177	0.15108	0.1642	0.15391	0.14749	0.16089	0.12742	0.13762	0.15222	0.16362	0.18378	0.13277	0.13873	0.13623	0.21452	0.20714	0.21981	0.60504	0.22663	0.48533	0.19	0.15897	0.21028	0.16466	0.17917	0.25249	0.33088	0.3998	0.31622	0.37077	0.65218	0.23345	0.73743	0.4853	0.4317	0.47803	0.44996
798	0.10719	0.12011	0.11335	0.11067	0.11714	0.11967	0.13395	0.10945	0.10786	0.13976	0.13	0.10405	0.14477	0.15437	0.16803	0.15744	0.15067	0.1647	0.13009	0.14051	0.15569	0.16757	0.18883	0.13555	0.1417	0.13908	0.22369	0.21563	0.23024	0.54267	0.23838	0.56417	0.19537	0.16276	0.2172	0.16868	0.18392	0.26393	0.37142	0.4551	0.35278	0.42125	0.72344	0.24636	0.68389	0.56604	0.50671	0.5603	0.52501
799	0.10946	0.12256	0.11571	0.11298	0.11952	0.12211	0.13663	0.11175	0.1101	0.14264	0.1327	0.10623	0.14785	0.15778	0.17205	0.16113	0.15396	0.16872	0.13281	0.14349	0.15931	0.17172	0.19425	0.13841	0.14475	0.14201	0.23421	0.22535	0.24241	0.48123	0.25253	0.65428	0.20119	0.16674	0.22487	0.17293	0.18901	0.27722	0.42462	0.52298	0.40108	0.4852	0.77483	0.26177	0.62876	0.65857	0.60241	0.65663	0.61531
800	0.11176	0.12505	0.11811	0.11532	0.12194	0.1246	0.13937	0.11407	0.11238	0.14559	0.13545	0.10845	0.15104	0.16134	0.17629	0.165	0.15737	0.17296	0.1356	0.14656	0.1631	0.17611	0.20013	0.14134	0.14791	0.14502	0.24643	0.2366	0.25677	0.42104	0.27	0.74359	0.20755	0.17094	0.23346	0.17745	0.19452	0.29287	0.4938	0.60193	0.46485	0.5632	0.79818	0.28043	0.57354	0.74986	0.712	0.75367	0.71152
801	0.11409	0.12758	0.12054	0.11769	0.1244	0.12713	0.14217	0.11644	0.11469	0.14863	0.13828	0.1107	0.15435	0.16505	0.18078	0.16907	0.16092	0.17747	0.13847	0.14973	0.16708	0.18077	0.20654	0.14436	0.15118	0.14813	0.26079	0.24984	0.27394	0.36254	0.29208	0.8124	0.21458	0.17542	0.24321	0.18227	0.20052	0.31157	0.58027	0.68475	0.54696	0.65114	0.79447	0.30331	0.51911	0.81891	0.81275	0.8283	0.79388
802	0.11644	0.13016	0.12301	0.12009	0.1269	0.1297	0.14505	0.11883	0.11703	0.15177	0.14118	0.11298	0.15777	0.16893	0.18555	0.17338	0.16463	0.18229	0.14141	0.15301	0.17126	0.18576	0.21359	0.14748	0.15457	0.15134	0.27784	0.26566	0.29469	0.3065	0.32063	0.84512	0.22242	0.1802	0.25443	0.18747	0.20712	0.33411	0.67875	0.75742	0.64535	0.73691	0.77077	0.33162	0.46593	0.84994	0.87472	0.86234	0.84176
803	0.11883	0.1328	0.12553	0.12253	0.12944	0.13233	0.148	0.12126	0.1194	0.15501	0.14416	0.11529	0.16134	0.17301	0.19066	0.17797	0.16851	0.18748	0.14443	0.15641	0.17568	0.19112	0.22141	0.1507	0.15811	0.15467	0.2983	0.28485	0.32002	0.25417	0.35826	0.84165	0.23126	0.18536	0.26747	0.19311	0.21446	0.3614	0.77225	0.80468	0.74649	0.80236	0.73436	0.3669	0.41427	0.84405	0.8866	0.85675	0.84947
804	0.12126	0.13548	0.12809	0.12501	0.13203	0.13501	0.15103	0.12373	0.12181	0.15836	0.14724	0.11764	0.16506	0.17731	0.19617	0.18288	0.17261	0.1931	0.14756	0.15996	0.18039	0.19692	0.23018	0.15404	0.1618	0.15813	0.32311	0.30853	0.35121	0.20725	0.40839	0.81283	0.24131	0.19096	0.28279	0.19928	0.22272	0.39418	0.83698	0.81955	0.82559	0.83375	0.69041	0.41093	0.36432	0.81314	0.86125	0.82496	0.82665
805	0.12372	0.13823	0.1307	0.12753	0.13467	0.13775	0.15415	0.12625	0.12425	0.16183	0.15041	0.12002	0.16895	0.18187	0.20214	0.18817	0.17693	0.19924	0.15079	0.16367	0.18541	0.20325	0.24011	0.15751	0.16568	0.16173	0.35344	0.33821	0.38986	0.16754	0.47485	0.76972	0.25282	0.1971	0.30087	0.20607	0.23209	0.43272	0.85893	0.80635	0.86196	0.83075	0.64208	0.46546	0.3164	0.76846	0.81687	0.77931	0.78632
806	0.12623	0.14104	0.13336	0.1301	0.13737	0.14056	0.15736	0.12881	0.12674	0.16545	0.15369	0.12243	0.17305	0.18674	0.20869	0.19391	0.18152	0.20598	0.15413	0.16755	0.19081	0.21022	0.25151	0.16113	0.16976	0.1655	0.3908	0.37596	0.43775	0.13616	0.56006	0.71895	0.26605	0.20388	0.32221	0.21362	0.24281	0.47635	0.844	0.77437	0.85602	0.80318	0.59126	0.53142	0.27113	0.71646	0.76346	0.7265	0.73671
807	0.12878	0.14392	0.13608	0.13271	0.14012	0.14343	0.16068	0.13141	0.12926	0.16922	0.15709	0.12489	0.17737	0.19196	0.21592	0.20016	0.18642	0.21343	0.15761	0.17164	0.19665	0.21797	0.26479	0.16491	0.17408	0.16944	0.43682	0.42442	0.49644	0.11295	0.66013	0.66424	0.28124	0.21145	0.34726	0.22204	0.25515	0.52309	0.80667	0.7312	0.82274	0.76104	0.53908	0.60708	0.22948	0.66073	0.70564	0.67016	0.68229
808	0.13137	0.14688	0.13886	0.13538	0.14294	0.14638	0.16412	0.13407	0.13183	0.17317	0.16063	0.12738	0.18197	0.19761	0.22402	0.20703	0.19168	0.22172	0.16123	0.17595	0.20303	0.2267	0.28045	0.16887	0.17866	0.1736	0.49284	0.4864	0.56605	0.096672	0.75909	0.60774	0.29866	0.21998	0.37638	0.23151	0.26945	0.56959	0.75762	0.68164	0.77524	0.71078	0.48627	0.68547	0.19261	0.60333	0.64601	0.61236	0.62559
809	0.13402	0.14992	0.14171	0.13811	0.14583	0.14941	0.16768	0.13679	0.13445	0.17731	0.16431	0.12991	0.18687	0.20377	0.23318	0.21462	0.19734	0.23097	0.16501	0.18053	0.21006	0.23664	0.29918	0.17304	0.18354	0.178	0.55876	0.56348	0.64306	0.085675	0.83161	0.55066	0.31858	0.22967	0.40973	0.24221	0.28609	0.61148	0.70248	0.62856	0.7205	0.6561	0.4334	0.75366	0.16157	0.54542	0.58594	0.5542	0.56806
810	0.13672	0.15305	0.14463	0.1409	0.14879	0.15253	0.17138	0.13957	0.13712	0.18167	0.16817	0.13249	0.19213	0.21055	0.2437	0.22307	0.20347	0.24139	0.16897	0.18541	0.21787	0.24813	0.32177	0.17746	0.18878	0.18267	0.63106	0.65261	0.71806	0.078495	0.86067	0.4937	0.34125	0.24082	0.4471	0.25437	0.30551	0.64431	0.6443	0.57371	0.66212	0.59919	0.38101	0.7976	0.13681	0.48767	0.52614	0.49631	0.51048
811	0.13948	0.15628	0.14764	0.14375	0.15184	0.15575	0.17523	0.14241	0.13985	0.18628	0.17221	0.13512	0.19784	0.21809	0.25592	0.23256	0.21017	0.25318	0.17313	0.19063	0.22665	0.26157	0.34908	0.18214	0.19443	0.18765	0.70089	0.74149	0.77692	0.074026	0.85037	0.43734	0.36687	0.25377	0.48771	0.2683	0.32825	0.6648	0.58482	0.51815	0.60212	0.54129	0.32985	0.81099	0.11802	0.43059	0.46705	0.43914	0.45338
812	0.14231	0.15962	0.15073	0.14668	0.15497	0.15908	0.17926	0.14533	0.14264	0.19118	0.17646	0.13781	0.20407	0.22657	0.27028	0.2433	0.21752	0.26661	0.17753	0.19626	0.23665	0.27744	0.38186	0.18714	0.20056	0.19301	0.75558	0.80995	0.80808	0.071476	0.8155	0.38204	0.39552	0.26901	0.52994	0.28434	0.35485	0.6717	0.525	0.46258	0.54163	0.48322	0.28093	0.79769	0.10432	0.37469	0.40904	0.3831	0.39723
813	0.14521	0.16307	0.15392	0.14968	0.1582	0.16252	0.18347	0.14832	0.14549	0.1964	0.18096	0.14055	0.21094	0.23621	0.28728	0.25558	0.22566	0.28201	0.1822	0.20238	0.24815	0.29635	0.42046	0.19251	0.20726	0.1988	0.7847	0.84191	0.80941	0.070291	0.76777	0.32843	0.42707	0.28714	0.57118	0.30291	0.38582	0.66582	0.46548	0.40759	0.48134	0.42558	0.23557	0.76616	0.094633	0.32068	0.35261	0.32882	0.34261
814	0.14818	0.16665	0.15721	0.15277	0.16153	0.16608	0.1879	0.1514	0.14842	0.20201	0.18573	0.14335	0.21858	0.2473	0.30754	0.26975	0.23474	0.29977	0.18717	0.20905	0.26153	0.31896	0.46454	0.19831	0.21463	0.20511	0.78628	0.83731	0.78745	0.070079	0.71326	0.27748	0.46107	0.30899	0.60806	0.3245	0.42152	0.64924	0.40681	0.35381	0.42181	0.36903	0.19534	0.72363	0.087972	0.26962	0.29857	0.27726	0.29042
815	0.15124	0.17038	0.16062	0.15596	0.16498	0.16979	0.19257	0.15457	0.15142	0.20805	0.19083	0.14622	0.22719	0.26019	0.33173	0.28626	0.24498	0.32036	0.1925	0.21642	0.27727	0.34604	0.51275	0.20462	0.22282	0.21204	0.76585	0.80753	0.75044	0.070564	0.65527	0.23055	0.49663	0.33555	0.63712	0.34968	0.4619	0.62443	0.34967	0.3021	0.36367	0.31446	0.16161	0.6747	0.083554	0.22298	0.24819	0.22982	0.24196
816	0.15438	0.17426	0.16415	0.15924	0.16855	0.17366	0.19751	0.15785	0.1545	0.21461	0.1963	0.14915	0.237	0.27534	0.36065	0.30567	0.25662	0.34429	0.19825	0.2246	0.296	0.37845	0.56256	0.21154	0.232	0.21973	0.73078	0.76355	0.70453	0.071547	0.59572	0.18927	0.53227	0.36808	0.65566	0.37902	0.5062	0.59363	0.29507	0.25366	0.30786	0.26312	0.13502	0.62219	0.08079	0.18242	0.20313	0.18815	0.19885
817	0.15763	0.17832	0.16782	0.16264	0.17227	0.1777	0.20276	0.16123	0.15767	0.2218	0.20221	0.15217	0.24833	0.29335	0.39515	0.32869	0.27	0.37213	0.2045	0.23381	0.31853	0.41701	0.61022	0.2192	0.24239	0.22834	0.68689	0.71207	0.65358	0.072885	0.53566	0.15506	0.56604	0.40797	0.66251	0.41302	0.55261	0.55871	0.24441	0.21001	0.25571	0.21662	0.11523	0.56784	0.079251	0.14928	0.16508	0.15373	0.16263
818	0.16098	0.18258	0.17165	0.16616	0.17614	0.18193	0.20838	0.16473	0.16094	0.22972	0.20864	0.15526	0.26161	0.31501	0.43593	0.35614	0.28553	0.40436	0.21134	0.24426	0.3459	0.46229	0.65117	0.22778	0.25429	0.23811	0.6379	0.65669	0.59991	0.074476	0.47574	0.12851	0.59561	0.45649	0.6581	0.45192	0.59797	0.52109	0.19949	0.17269	0.20897	0.1767	0.10118	0.5127	0.07863	0.12393	0.13504	0.1271	0.13413
819	0.16444	0.18706	0.17565	0.16981	0.18018	0.18639	0.21441	0.16836	0.16431	0.23854	0.2157	0.15845	0.27743	0.34131	0.48327	0.38893	0.30372	0.44132	0.2189	0.25629	0.37936	0.51413	0.68115	0.23748	0.26807	0.24934	0.58618	0.59952	0.54499	0.076246	0.41654	0.10909	0.61875	0.51415	0.64399	0.49543	0.63811	0.48192	0.16198	0.14274	0.16942	0.1446	0.091562	0.45751	0.0787	0.10562	0.11283	0.10772	0.11306
820	0.16804	0.19179	0.17984	0.17361	0.18441	0.19108	0.22092	0.17214	0.1678	0.24845	0.22352	0.16173	0.29657	0.37344	0.53629	0.42794	0.3252	0.48288	0.22734	0.27029	0.4203	0.5708	0.6975	0.24859	0.28421	0.26243	0.53318	0.54177	0.48972	0.078143	0.35871	0.095517	0.63383	0.57944	0.6222	0.5423	0.66867	0.44208	0.13274	0.12014	0.13818	0.12043	0.085228	0.40286	0.079294	0.092958	0.097217	0.094213	0.098206
821	0.17178	0.19681	0.18425	0.17757	0.18885	0.19606	0.22801	0.17608	0.17141	0.25971	0.23228	0.16512	0.32013	0.41266	0.59218	0.47366	0.35071	0.5281	0.23688	0.28682	0.46988	0.6282	0.69994	0.26151	0.30333	0.27793	0.47989	0.48418	0.43475	0.08013	0.30324	0.086361	0.64013	0.64717	0.59469	0.58989	0.68653	0.40234	0.11133	0.10395	0.11507	0.10319	0.081283	0.34943	0.080285	0.084497	0.086636	0.085135	0.088112
822	0.17568	0.20215	0.1889	0.18172	0.19354	0.20136	0.23578	0.18019	0.17516	0.27262	0.2422	0.16862	0.3495	0.45995	0.64571	0.52565	0.38104	0.57485	0.2478	0.30656	0.52825	0.67982	0.69003	0.27676	0.32622	0.29657	0.42698	0.4273	0.38067	0.082183	0.25153	0.080428	0.63788	0.70792	0.56313	0.63414	0.69068	0.36342	0.096413	0.092791	0.098838	0.091393	0.079065	0.29812	0.081577	0.079083	0.079722	0.079272	0.081505
823	0.17975	0.20788	0.19383	0.18607	0.19851	0.20703	0.24436	0.18451	0.17907	0.28759	0.25359	0.17224	0.38645	0.51537	0.68997	0.58164	0.41687	0.61955	0.26049	0.3304	0.59323	0.71837	0.67015	0.29501	0.35383	0.31932	0.37509	0.37169	0.32821	0.084283	0.20536	0.076811	0.62796	0.75086	0.52883	0.67021	0.68213	0.32597	0.086395	0.085397	0.087876	0.083613	0.078089	0.25015	0.083097	0.075848	0.075431	0.075713	0.077406
824	0.18401	0.21404	0.19908	0.19065	0.20378	0.21313	0.25392	0.18905	0.18314	0.30508	0.26684	0.176	0.4329	0.57694	0.7186	0.6369	0.45853	0.65758	0.27548	0.35941	0.65895	0.73862	0.64271	0.31721	0.38725	0.34744	0.32489	0.31806	0.27834	0.08642	0.16651	0.074848	0.61162	0.76906	0.49283	0.69384	0.66299	0.29066	0.079905	0.080722	0.08072	0.078709	0.078008	0.20704	0.084789	0.074165	0.073002	0.073797	0.0751
825	0.1885	0.22073	0.2047	0.19549	0.20943	0.21973	0.26466	0.19383	0.18739	0.32564	0.28248	0.17991	0.49036	0.63954	0.72865	0.68451	0.50548	0.6845	0.29346	0.39478	0.7159	0.7397	0.60972	0.34455	0.42756	0.38248	0.27727	0.26748	0.23238	0.088585	0.13598	0.074067	0.59007	0.76311	0.45586	0.70288	0.63562	0.2581	0.075931	0.078002	0.076278	0.075854	0.078571	0.17034	0.086612	0.07359	0.0719	0.073054	0.074072
826	0.19323	0.22802	0.21075	0.20062	0.21549	0.22691	0.27683	0.1989	0.19185	0.34991	0.30122	0.18399	0.55865	0.69496	0.72126	0.71745	0.5558	0.69748	0.3154	0.43765	0.75418	0.72447	0.57277	0.37854	0.47552	0.42614	0.23343	0.22139	0.19187	0.090774	0.11353	0.074134	0.56445	0.73878	0.4185	0.69773	0.60214	0.22886	0.073744	0.076684	0.073763	0.074458	0.079596	0.14099	0.088536	0.073809	0.071746	0.073152	0.073962
827	0.19824	0.23603	0.2173	0.2061	0.22204	0.23479	0.29072	0.20429	0.19655	0.37849	0.324	0.18824	0.63364	0.7343	0.70002	0.73164	0.60573	0.6962	0.34259	0.48862	0.76863	0.69713	0.53306	0.42087	0.5309	0.47983	0.19473	0.18143	0.15818	0.092986	0.097821	0.074809	0.53568	0.70228	0.38123	0.68056	0.56427	0.20335	0.072826	0.07637	0.072613	0.074099	0.080953	0.11894	0.090539	0.074594	0.072269	0.073851	0.07451
828	0.20358	0.24489	0.22444	0.21197	0.22917	0.2435	0.30668	0.21005	0.2015	0.41193	0.35204	0.19269	0.70543	0.75206	0.66879	0.72744	0.65005	0.68243	0.37672	0.54693	0.76096	0.6614	0.49153	0.47311	0.59154	0.54365	0.16235	0.14886	0.13186	0.09522	0.087228	0.075918	0.50454	0.658	0.34449	0.65411	0.52338	0.1818	0.07281	0.076775	0.072433	0.07448	0.082549	0.1032	0.092605	0.075785	0.073276	0.074981	0.075527
829	0.20927	0.25479	0.23228	0.21829	0.23698	0.25319	0.32513	0.21623	0.20674	0.45049	0.38686	0.19736	0.76027	0.74834	0.63066	0.70832	0.68332	0.65882	0.41979	0.60936	0.73697	0.62006	0.44893	0.53569	0.65233	0.61463	0.13682	0.124	0.11249	0.097475	0.080324	0.077339	0.47165	0.60884	0.30879	0.6209	0.48051	0.16415	0.073436	0.077695	0.072943	0.075387	0.084316	0.092397	0.094725	0.077266	0.07463	0.076418	0.076882
830	0.2154	0.26594	0.24096	0.22514	0.24561	0.26408	0.34652	0.22291	0.21231	0.49387	0.43018	0.20227	0.78722	0.7275	0.58786	0.67854	0.70178	0.62799	0.4738	0.66939	0.70242	0.57516	0.40589	0.60631	0.70536	0.68498	0.11779	0.10607	0.098855	0.099753	0.076057	0.078983	0.43754	0.55679	0.27471	0.58298	0.4365	0.15013	0.074522	0.078984	0.073945	0.07667	0.086208	0.085238	0.096891	0.078953	0.07623	0.078076	0.078477
831	0.22202	0.27859	0.25067	0.23262	0.25521	0.2764	0.37136	0.23015	0.21827	0.5408	0.48353	0.20745	0.78489	0.69471	0.54201	0.6415	0.7046	0.59206	0.53968	0.71802	0.66113	0.52813	0.36304	0.67784	0.74207	0.74258	0.10421	0.093653	0.089594	0.10206	0.073668	0.080787	0.40271	0.50322	0.2429	0.54189	0.39206	0.13926	0.075933	0.080537	0.075298	0.078221	0.088191	0.080733	0.099098	0.080789	0.078005	0.079891	0.080245
832	0.22922	0.29307	0.26163	0.24085	0.266	0.29046	0.40007	0.23808	0.22466	0.58863	0.54715	0.21294	0.76035	0.65377	0.49428	0.59964	0.6935	0.55266	0.6151	0.7473	0.61558	0.48	0.32106	0.73843	0.75736	0.77627	0.094865	0.085347	0.083552	0.10439	0.072608	0.082706	0.36758	0.4491	0.21406	0.49878	0.34793	0.131	0.077576	0.082278	0.0769	0.079961	0.090243	0.07814	0.10135	0.08273	0.079906	0.081819	0.082136
833	0.23712	0.30977	0.27412	0.24998	0.27823	0.30664	0.4329	0.2468	0.23156	0.63315	0.6181	0.21878	0.72209	0.60737	0.44552	0.55474	0.67142	0.51099	0.69192	0.7541	0.56752	0.43147	0.28072	0.77611	0.75162	0.78207	0.088665	0.080022	0.079845	0.10675	0.07249	0.084709	0.33262	0.3952	0.18879	0.45453	0.30493	0.12485	0.079383	0.084154	0.078677	0.081837	0.092347	0.076914	0.10363	0.084749	0.081897	0.083829	0.084117
834	0.24585	0.32916	0.28851	0.2602	0.29222	0.32536	0.46967	0.25648	0.23905	0.66923	0.68823	0.225	0.67542	0.55749	0.39647	0.50805	0.64117	0.46792	0.756	0.74111	0.51814	0.38315	0.24295	0.78572	0.72939	0.76479	0.084765	0.076845	0.077815	0.10914	0.073043	0.086774	0.29838	0.34239	0.16746	0.4098	0.26406	0.12035	0.081307	0.086128	0.08058	0.08381	0.094493	0.076665	0.10596	0.086825	0.083954	0.085899	0.086163
835	0.25559	0.35174	0.30528	0.27175	0.30835	0.34711	0.50943	0.26732	0.24725	0.69235	0.74474	0.23167	0.62331	0.50557	0.34791	0.46047	0.60499	0.42411	0.7936	0.71353	0.46815	0.33572	0.20877	0.77148	0.69553	0.732	0.082527	0.075198	0.076981	0.11158	0.074075	0.088886	0.26548	0.29174	0.15011	0.36523	0.22645	0.11712	0.083315	0.088172	0.082571	0.085853	0.096676	0.077114	0.10832	0.088944	0.086059	0.088015	0.088259
836	0.26657	0.37802	0.325	0.28493	0.3271	0.37238	0.5502	0.27956	0.25627	0.70021	0.77625	0.23884	0.56818	0.45261	0.30078	0.41264	0.5647	0.38015	0.80032	0.67592	0.41807	0.29002	0.17912	0.7408	0.65383	0.68926	0.08148	0.074642	0.077003	0.11405	0.075446	0.091036	0.23467	0.24464	0.13651	0.32151	0.19326	0.1149	0.085383	0.090269	0.084627	0.087948	0.098891	0.078062	0.11073	0.091099	0.088201	0.090168	0.090394
837	0.27906	0.40844	0.34841	0.30011	0.34897	0.40163	0.58893	0.29352	0.26628	0.69325	0.77989	0.24659	0.51155	0.39945	0.2563	0.36519	0.52163	0.33668	0.78201	0.63169	0.36846	0.24714	0.1546	0.69944	0.60707	0.64029	0.08129	0.074866	0.077637	0.11657	0.077058	0.093217	0.20672	0.2027	0.12617	0.27949	0.16541	0.11345	0.087496	0.092406	0.08673	0.090082	0.10114	0.079367	0.11318	0.093284	0.090374	0.092351	0.092561
838	0.29343	0.44324	0.37635	0.31779	0.37457	0.43514	0.62193	0.30957	0.2775	0.67379	0.76087	0.25501	0.45435	0.34704	0.21589	0.31886	0.47671	0.29447	0.74731	0.58327	0.32	0.20841	0.13527	0.65141	0.5572	0.5877	0.08172	0.075648	0.07871	0.11913	0.078841	0.095427	0.1823	0.16741	0.11857	0.24024	0.14323	0.11262	0.089644	0.094575	0.088869	0.092249	0.10341	0.080926	0.11569	0.095494	0.092573	0.094561	0.094756
839	0.31018	0.48224	0.40975	0.33854	0.40444	0.47282	0.64584	0.32821	0.29019	0.64474	0.72659	0.26422	0.39746	0.29652	0.18095	0.27457	0.43073	0.25451	0.70252	0.53234	0.27367	0.17509	0.12069	0.59945	0.50549	0.53313	0.082598	0.076827	0.080095	0.12175	0.080745	0.097663	0.16183	0.13956	0.11317	0.20492	0.12644	0.1123	0.09182	0.096772	0.091036	0.094443	0.10571	0.082667	0.11824	0.097731	0.094796	0.096796	0.096977
840	0.32991	0.52456	0.44949	0.36307	0.43902	0.51399	0.6585	0.35001	0.30467	0.60881	0.68281	0.27434	0.34184	0.24931	0.15246	0.23353	0.38442	0.21795	0.65165	0.48	0.23077	0.14803	0.11012	0.54529	0.45287	0.47762	0.083803	0.078291	0.081705	0.12443	0.082735	0.099926	0.14537	0.11889	0.10951	0.17462	0.11427	0.11241	0.09402	0.098995	0.093227	0.096661	0.10805	0.084538	0.12085	0.099992	0.097042	0.099057	0.099223
841	0.3534	0.56831	0.49602	0.39219	0.47838	0.55705	0.65955	0.37566	0.32137	0.56813	0.63313	0.28553	0.28874	0.20708	0.13056	0.19704	0.33857	0.18595	0.59732	0.42713	0.19277	0.12724	0.10274	0.49002	0.40015	0.42199	0.085249	0.079958	0.083474	0.12718	0.084789	0.10222	0.13267	0.10428	0.10721	0.14996	0.1058	0.11287	0.096242	0.10124	0.095441	0.098903	0.11042	0.086504	0.12351	0.10228	0.099313	0.10134	0.10149
842	0.3816	0.61044	0.5487	0.42671	0.52186	0.59927	0.65004	0.40592	0.34082	0.52431	0.58	0.298	0.23973	0.17133	0.11458	0.16625	0.29414	0.15934	0.54123	0.37458	0.16093	0.11205	0.097837	0.43448	0.34818	0.36711	0.086874	0.08177	0.08536	0.13	0.086888	0.10453	0.12322	0.094366	0.10598	0.13091	0.10017	0.11365	0.098487	0.10351	0.097676	0.10117	0.11283	0.088539	0.12625	0.10459	0.10161	0.10366	0.10379
843	0.41559	0.64704	0.60489	0.4672	0.56761	0.63699	0.63181	0.44147	0.36366	0.47858	0.52508	0.31197	0.19663	0.14295	0.10342	0.14171	0.25233	0.13836	0.4844	0.32332	0.1358	0.1014	0.094795	0.37948	0.29802	0.31396	0.088635	0.083688	0.087331	0.1329	0.089022	0.10688	0.11647	0.087909	0.10555	0.11688	0.096661	0.11468	0.10076	0.10582	0.099933	0.10346	0.11527	0.090627	0.12906	0.10694	0.10393	0.106	0.10612
844	0.45642	0.6741	0.65929	0.51365	0.61236	0.66625	0.60686	0.4827	0.39063	0.4319	0.46941	0.32775	0.16097	0.12179	0.095913	0.1232	0.21445	0.12263	0.42761	0.27454	0.11708	0.094198	0.093141	0.32594	0.25101	0.26388	0.090501	0.085683	0.089367	0.13589	0.091185	0.10926	0.11187	0.083933	0.10576	0.10695	0.094706	0.11595	0.10305	0.10815	0.10221	0.10578	0.11776	0.092757	0.13195	0.10932	0.10629	0.10838	0.10848
845	0.50464	0.68876	0.7044	0.56472	0.65155	0.68388	0.57693	0.5292	0.42251	0.38511	0.41382	0.34569	0.13342	0.10681	0.091108	0.10986	0.18173	0.11131	0.37163	0.22974	0.10374	0.089562	0.092514	0.27507	0.20875	0.21849	0.092449	0.087736	0.091454	0.13898	0.093372	0.11168	0.10894	0.081732	0.10645	0.10019	0.093888	0.11742	0.10537	0.11051	0.10452	0.10813	0.12029	0.094921	0.13492	0.11173	0.10867	0.11079	0.11087
846	0.55954	0.69009	0.73302	0.61706	0.68039	0.68853	0.54339	0.57916	0.45993	0.33907	0.35916	0.36619	0.11343	0.096611	0.088277	0.1006	0.15498	0.10347	0.31744	0.19054	0.094567	0.08681	0.092645	0.22847	0.17278	0.17947	0.094463	0.089834	0.093582	0.14218	0.095581	0.11414	0.10729	0.080801	0.10751	0.095826	0.093897	0.11906	0.10771	0.11291	0.10685	0.11051	0.12287	0.097117	0.13799	0.11418	0.11109	0.11324	0.1133
847	0.61795	0.67913	0.74144	0.66506	0.69543	0.68078	0.50729	0.62879	0.50301	0.29471	0.30648	0.38973	0.099596	0.089924	0.086874	0.094424	0.13428	0.098281	0.26633	0.15821	0.088496	0.085433	0.093331	0.18785	0.14404	0.14804	0.096533	0.09197	0.095745	0.14551	0.097812	0.11664	0.10663	0.080773	0.10887	0.093238	0.094508	0.12085	0.11009	0.11535	0.10922	0.11293	0.12551	0.099342	0.14117	0.11668	0.11355	0.11574	0.11577
848	0.6735	0.65799	0.73089	0.70208	0.69576	0.66253	0.46943	0.67249	0.55077	0.25316	0.25714	0.41683	0.090354	0.085788	0.086494	0.09053	0.11903	0.095069	0.21996	0.13319	0.084709	0.085047	0.094425	0.15457	0.12246	0.12432	0.098651	0.094137	0.097941	0.14897	0.10007	0.11919	0.10669	0.081384	0.11045	0.091954	0.095554	0.12278	0.11251	0.11784	0.11162	0.11538	0.12822	0.10159	0.14447	0.11922	0.11606	0.11828	0.11829
849	0.71766	0.629	0.70567	0.72268	0.68278	0.63604	0.43046	0.70424	0.60049	0.21564	0.21277	0.44794	0.084412	0.083487	0.086845	0.088312	0.10824	0.093319	0.18005	0.11493	0.082591	0.085374	0.095819	0.12907	0.10709	0.10741	0.10081	0.096334	0.10017	0.1526	0.10234	0.12179	0.10731	0.082449	0.11221	0.09162	0.096919	0.12482	0.11497	0.12038	0.11405	0.11788	0.13098	0.10388	0.1479	0.12181	0.11861	0.12087	0.12085
850	0.74286	0.59416	0.67046	0.72494	0.65913	0.60335	0.39095	0.71982	0.64741	0.18328	0.17498	0.48335	0.080836	0.082495	0.087717	0.087312	0.10089	0.09264	0.14787	0.10219	0.081682	0.086217	0.097436	0.11066	0.096575	0.095837	0.10301	0.09856	0.10243	0.1564	0.10464	0.12445	0.10835	0.083839	0.11411	0.091975	0.098518	0.12697	0.11746	0.12297	0.11653	0.12043	0.13383	0.10619	0.15148	0.12446	0.12121	0.12352	0.12347
851	0.74618	0.5551	0.62861	0.71072	0.6275	0.56611	0.35151	0.71845	0.68541	0.15682	0.14481	0.52287	0.078953	0.082426	0.088965	0.087192	0.096126	0.092741	0.12361	0.093629	0.08164	0.087434	0.09922	0.097935	0.089636	0.088184	0.10525	0.10081	0.10472	0.1604	0.10697	0.12717	0.10971	0.08546	0.11613	0.092832	0.10029	0.12922	0.12001	0.12562	0.11905	0.12303	0.13675	0.10854	0.15522	0.12717	0.12387	0.12623	0.12615
852	0.73018	0.51307	0.5823	0.68386	0.59003	0.52563	0.31285	0.70245	0.70901	0.13634	0.12224	0.56547	0.078265	0.083009	0.090482	0.087707	0.093266	0.093411	0.10632	0.08811	0.082224	0.088921	0.10113	0.089437	0.085299	0.083358	0.10753	0.1031	0.10704	0.16464	0.10933	0.12995	0.11131	0.087247	0.11825	0.094057	0.1022	0.13156	0.12261	0.12834	0.12162	0.12569	0.13976	0.11092	0.15915	0.12995	0.12659	0.129	0.12889
853	0.7002	0.46907	0.5331	0.6481	0.54839	0.48293	0.27576	0.67542	0.71553	0.12122	0.10623	0.60883	0.078415	0.084057	0.092193	0.088683	0.091802	0.094498	0.094494	0.0848	0.083258	0.090606	0.10314	0.083995	0.082845	0.08057	0.10985	0.10541	0.1094	0.16916	0.11172	0.13282	0.11311	0.089154	0.12046	0.095551	0.1042	0.13399	0.12526	0.13114	0.12424	0.12841	0.14288	0.11334	0.1633	0.1328	0.12939	0.13186	0.1317
854	0.66108	0.42395	0.48226	0.60618	0.50389	0.43885	0.24116	0.64057	0.70582	0.11051	0.095301	0.64913	0.079158	0.085436	0.094047	0.089996	0.091349	0.095892	0.086663	0.083081	0.084619	0.092437	0.10523	0.080759	0.081736	0.079236	0.11221	0.10776	0.1118	0.174	0.11415	0.13577	0.11505	0.09115	0.12275	0.097245	0.10629	0.13651	0.12798	0.13401	0.12693	0.1312	0.1461	0.1158	0.16769	0.13574	0.13226	0.13479	0.13459
855	0.61591	0.37844	0.43075	0.56003	0.45758	0.39412	0.21	0.60023	0.68305	0.10321	0.088102	0.68163	0.080322	0.08705	0.096005	0.091553	0.091626	0.097511	0.081713	0.082492	0.086215	0.094376	0.10739	0.079104	0.08158	0.078926	0.11462	0.11014	0.11423	0.17923	0.11661	0.13881	0.11712	0.093212	0.12512	0.099088	0.10845	0.13911	0.13077	0.13698	0.12968	0.13407	0.14945	0.11831	0.17235	0.13877	0.13521	0.13782	0.13757
856	0.56669	0.33338	0.37937	0.51116	0.41036	0.34949	0.18306	0.55607	0.65073	0.09845	0.083597	0.70195	0.081786	0.088831	0.098043	0.093291	0.092431	0.099301	0.078836	0.082702	0.087981	0.096398	0.1096	0.078567	0.082099	0.07934	0.11707	0.11256	0.11672	0.18492	0.11912	0.14196	0.11928	0.095327	0.12755	0.10105	0.11067	0.14179	0.13363	0.14004	0.1325	0.13702	0.15294	0.12086	0.17735	0.1419	0.13826	0.14095	0.14064
857	0.51495	0.28973	0.329	0.46072	0.36306	0.30582	0.16078	0.50939	0.61166	0.095574	0.081037	0.70767	0.083461	0.090734	0.10014	0.095162	0.093621	0.10122	0.077442	0.083482	0.089872	0.098486	0.11186	0.078819	0.083102	0.080268	0.11956	0.11502	0.11925	0.19118	0.12168	0.14522	0.12154	0.097483	0.13005	0.1031	0.11293	0.14457	0.13658	0.14321	0.13541	0.14007	0.15658	0.12347	0.18273	0.14514	0.14142	0.1442	0.14382
858	0.46196	0.24867	0.2808	0.40966	0.31666	0.26418	0.14315	0.46121	0.56779	0.094071	0.079853	0.69928	0.085285	0.092726	0.10229	0.097135	0.095087	0.10324	0.077086	0.084666	0.091856	0.10063	0.11417	0.079632	0.084447	0.081562	0.12211	0.11753	0.12183	0.19817	0.12429	0.14861	0.12388	0.099676	0.13262	0.10522	0.11525	0.14743	0.13963	0.1465	0.1384	0.14322	0.16041	0.12614	0.18856	0.14851	0.14469	0.14757	0.14712
859	0.40861	0.21151	0.23617	0.35889	0.27231	0.22581	0.12973	0.41233	0.52077	0.093556	0.07964	0.67895	0.087217	0.094785	0.10449	0.099187	0.096756	0.10533	0.077465	0.086138	0.09391	0.10281	0.11653	0.080842	0.086036	0.083114	0.12472	0.12008	0.12447	0.20607	0.12696	0.15215	0.12629	0.1019	0.13526	0.1074	0.11762	0.15038	0.14277	0.14994	0.14149	0.14649	0.16444	0.12887	0.19495	0.15202	0.14809	0.15108	0.15055
860	0.35584	0.17948	0.19672	0.30947	0.23138	0.192	0.1199	0.36351	0.4718	0.093757	0.080116	0.64933	0.089226	0.096895	0.10672	0.1013	0.098575	0.1075	0.07837	0.087817	0.096021	0.10504	0.11893	0.082335	0.087801	0.08485	0.12738	0.1227	0.12717	0.21519	0.12969	0.15585	0.12876	0.10416	0.13796	0.10964	0.12003	0.15344	0.14604	0.15352	0.14469	0.1499	0.16872	0.13168	0.20201	0.1557	0.15164	0.15476	0.15414
861	0.30476	0.15334	0.16378	0.26272	0.1953	0.16371	0.11295	0.3157	0.42183	0.094477	0.081083	0.61293	0.091293	0.099046	0.10899	0.10347	0.10051	0.10972	0.079645	0.089643	0.098176	0.1073	0.12138	0.08403	0.089692	0.086718	0.13011	0.12537	0.12995	0.22592	0.13248	0.15974	0.13131	0.10645	0.14075	0.11193	0.12249	0.1566	0.14944	0.15729	0.14802	0.15345	0.17329	0.13457	0.20992	0.15955	0.15535	0.15862	0.15789
862	0.25676	0.13317	0.13794	0.22021	0.16519	0.14133	0.10826	0.27006	0.37177	0.095575	0.082396	0.57179	0.093404	0.10123	0.11129	0.10568	0.10252	0.11199	0.081184	0.091577	0.10037	0.10961	0.12388	0.085868	0.091676	0.088681	0.13291	0.1281	0.13279	0.23888	0.13536	0.16384	0.13392	0.10877	0.14361	0.11426	0.125	0.15987	0.15299	0.16126	0.15149	0.15718	0.17819	0.13754	0.2189	0.16362	0.15925	0.16268	0.16184
863	0.21353	0.11836	0.11882	0.1835	0.14149	0.12451	0.10531	0.22802	0.32266	0.096951	0.083957	0.52741	0.09555	0.10345	0.11363	0.10793	0.10461	0.11431	0.082911	0.093591	0.1026	0.11194	0.12643	0.087809	0.093729	0.090713	0.1358	0.13091	0.13573	0.25495	0.13832	0.1682	0.1366	0.11112	0.14655	0.11664	0.12757	0.16326	0.15671	0.16547	0.15512	0.16111	0.18351	0.14061	0.22929	0.16794	0.16337	0.167	0.16601
864	0.17666	0.10796	0.10535	0.15366	0.12384	0.11245	0.10366	0.19109	0.27573	0.098533	0.085694	0.48094	0.097726	0.1057	0.11601	0.11023	0.10675	0.11667	0.08477	0.095665	0.10486	0.11432	0.12904	0.089826	0.095837	0.092799	0.13876	0.1338	0.13875	0.2755	0.14137	0.17284	0.13936	0.1135	0.14959	0.11906	0.13019	0.16678	0.16063	0.16995	0.15893	0.16527	0.18934	0.14379	0.24155	0.17254	0.16774	0.17159	0.17044
865	0.14716	0.10097	0.096251	0.13086	0.1113	0.10417	0.10301	0.16045	0.23248	0.10027	0.087557	0.43326	0.099929	0.10798	0.11842	0.11256	0.10894	0.11909	0.086726	0.097786	0.10716	0.11674	0.1317	0.091899	0.097987	0.094925	0.14183	0.13677	0.14188	0.30263	0.14452	0.17784	0.14219	0.11593	0.15272	0.12154	0.13287	0.17045	0.16478	0.17476	0.16295	0.1697	0.19578	0.14709	0.25638	0.17749	0.1724	0.17653	0.17519
866	0.12499	0.096529	0.090374	0.11436	0.10277	0.098744	0.1031	0.13653	0.19449	0.10213	0.089512	0.38516	0.10216	0.11029	0.12088	0.11494	0.11118	0.12155	0.088751	0.099948	0.10949	0.11919	0.13443	0.094016	0.10017	0.097085	0.145	0.13984	0.14513	0.33967	0.14779	0.18327	0.1451	0.11839	0.15595	0.12406	0.13561	0.17427	0.16919	0.17997	0.16722	0.17445	0.20301	0.15052	0.27483	0.18286	0.17742	0.18186	0.1803
867	0.10921	0.093952	0.086822	0.10296	0.097254	0.095439	0.10374	0.11886	0.163	0.10409	0.091536	0.3375	0.10441	0.11263	0.12337	0.11735	0.11346	0.12406	0.090829	0.10214	0.11185	0.1217	0.13722	0.096169	0.1024	0.099275	0.14829	0.14303	0.14851	0.39173	0.15119	0.18922	0.1481	0.1209	0.1593	0.12664	0.13842	0.17827	0.17393	0.18564	0.17178	0.17959	0.21123	0.15412	0.29848	0.18874	0.18285	0.1877	0.18587
868	0.098441	0.092722	0.084929	0.095405	0.093925	0.093675	0.1048	0.10641	0.13846	0.10613	0.093612	0.29128	0.10669	0.11501	0.12592	0.11981	0.11578	0.12663	0.092948	0.10437	0.11426	0.12425	0.14009	0.098353	0.10465	0.10149	0.15172	0.14633	0.15204	0.46596	0.15474	0.19583	0.15119	0.12346	0.16278	0.12927	0.14131	0.18246	0.17904	0.19188	0.17669	0.1852	0.22072	0.15789	0.32966	0.19527	0.1888	0.19416	0.192
869	0.091403	0.092462	0.084216	0.090661	0.092176	0.093026	0.10617	0.097998	0.12038	0.10824	0.095731	0.24782	0.10899	0.11742	0.12851	0.12232	0.11815	0.12925	0.0951	0.10663	0.1167	0.12685	0.14303	0.10056	0.10693	0.10373	0.1553	0.14977	0.15573	0.56961	0.15846	0.20328	0.15438	0.12607	0.16639	0.13197	0.14429	0.18687	0.18461	0.19882	0.18202	0.19139	0.23188	0.16187	0.3716	0.20263	0.1954	0.20139	0.19883
870	0.087051	0.092898	0.08434	0.087928	0.091557	0.093178	0.10778	0.092581	0.1077	0.1104	0.097884	0.2086	0.11133	0.11986	0.13116	0.12488	0.12056	0.13193	0.097281	0.10892	0.11918	0.12951	0.14607	0.1028	0.10924	0.106	0.15905	0.15336	0.15962	0.70087	0.16236	0.21183	0.15769	0.12874	0.17015	0.13474	0.14735	0.19153	0.19075	0.20663	0.18785	0.19829	0.24523	0.16609	0.42825	0.21107	0.2028	0.20962	0.20655
871	0.084608	0.093833	0.085059	0.086624	0.091743	0.093908	0.10957	0.089336	0.099166	0.11262	0.10007	0.17505	0.11369	0.12235	0.13387	0.1275	0.12302	0.13469	0.099489	0.11125	0.12171	0.13223	0.1492	0.10507	0.11159	0.1083	0.16299	0.15713	0.16373	0.83204	0.1665	0.22181	0.16112	0.13147	0.17409	0.13758	0.15051	0.19647	0.19759	0.21554	0.19432	0.2061	0.26148	0.17058	0.50303	0.22092	0.21124	0.21914	0.2154
872	0.083516	0.095127	0.086202	0.086334	0.092505	0.095053	0.1115	0.087649	0.093704	0.11488	0.10228	0.14802	0.11609	0.12489	0.13664	0.13018	0.12553	0.13751	0.10172	0.1136	0.12429	0.13502	0.15244	0.10736	0.11397	0.11063	0.16717	0.1611	0.1681	0.9141	0.17089	0.23367	0.16468	0.13427	0.17821	0.1405	0.15378	0.20174	0.20531	0.22585	0.20157	0.21508	0.28163	0.17541	0.59565	0.23263	0.22103	0.23033	0.22572
873	0.083379	0.096681	0.087645	0.086763	0.093677	0.096499	0.11354	0.087075	0.090453	0.1172	0.10453	0.12752	0.11853	0.12747	0.13949	0.13292	0.1281	0.14042	0.10398	0.116	0.12692	0.13788	0.1558	0.10968	0.11639	0.11299	0.1716	0.1653	0.17277	0.92762	0.17559	0.24799	0.1684	0.13714	0.18255	0.1435	0.15717	0.20739	0.21417	0.23795	0.20983	0.22556	0.30694	0.18062	0.69666	0.24679	0.23259	0.24376	0.23798
874	0.083918	0.098425	0.089304	0.0877	0.095144	0.098163	0.11567	0.087295	0.08878	0.11956	0.1068	0.11276	0.121	0.13011	0.14241	0.13574	0.13072	0.14342	0.10627	0.11843	0.12962	0.14083	0.15928	0.11204	0.11886	0.11538	0.17634	0.16978	0.1778	0.89829	0.18065	0.26557	0.17228	0.1401	0.18714	0.14661	0.1607	0.21347	0.22449	0.25242	0.21939	0.23801	0.33904	0.18629	0.7848	0.26421	0.24652	0.26014	0.2528
875	0.084935	0.10031	0.091117	0.088999	0.096822	0.099988	0.11787	0.088079	0.088228	0.12197	0.1091	0.1026	0.12352	0.1328	0.14541	0.13864	0.1334	0.14651	0.10858	0.1209	0.13237	0.14386	0.16292	0.11442	0.12136	0.1178	0.18144	0.17456	0.18325	0.84935	0.18616	0.28741	0.17636	0.14315	0.19201	0.14982	0.16438	0.22009	0.23674	0.26999	0.23066	0.25307	0.37976	0.19252	0.83722	0.28592	0.26362	0.28052	0.27109
876	0.08629	0.1023	0.093043	0.090555	0.098655	0.10193	0.12015	0.089266	0.088469	0.12442	0.11143	0.095923	0.12609	0.13556	0.14851	0.14162	0.13615	0.1497	0.11092	0.12342	0.1352	0.14699	0.16672	0.11685	0.12391	0.12027	0.18696	0.17971	0.1892	0.79083	0.19219	0.31482	0.18065	0.1463	0.1972	0.15316	0.16824	0.22733	0.25156	0.29166	0.24418	0.27158	0.43081	0.19943	0.84774	0.31329	0.28506	0.30629	0.29408
877	0.087886	0.10437	0.095052	0.092296	0.1006	0.10397	0.12248	0.090741	0.089273	0.12693	0.11379	0.091785	0.1287	0.13839	0.15171	0.14469	0.13897	0.15302	0.1133	0.12599	0.13811	0.15023	0.1707	0.11931	0.12652	0.12278	0.19299	0.18531	0.19576	0.72894	0.19889	0.34951	0.18519	0.14957	0.20277	0.15663	0.17229	0.23534	0.26982	0.3187	0.26074	0.29468	0.49305	0.20718	0.8273	0.34812	0.3125	0.33936	0.32348
878	0.089653	0.1065	0.097125	0.09417	0.10264	0.10608	0.12487	0.092423	0.090476	0.12949	0.11619	0.089471	0.13138	0.14129	0.15503	0.14788	0.14186	0.15647	0.11571	0.12861	0.1411	0.15359	0.1749	0.12182	0.12918	0.12534	0.19963	0.19143	0.20307	0.66597	0.2064	0.39363	0.19002	0.15297	0.20879	0.16025	0.17656	0.24428	0.29276	0.35274	0.28143	0.3239	0.56527	0.21598	0.78875	0.3927	0.34831	0.38228	0.36159
879	0.091544	0.10869	0.099247	0.096141	0.10474	0.10825	0.12732	0.094255	0.091964	0.13211	0.11863	0.088459	0.13411	0.14428	0.15847	0.15118	0.14485	0.16006	0.11817	0.13129	0.14419	0.15709	0.17933	0.12437	0.1319	0.12795	0.20702	0.1982	0.2113	0.60298	0.21495	0.44967	0.19518	0.15651	0.21535	0.16404	0.18109	0.25437	0.32208	0.39572	0.30779	0.36123	0.64235	0.2261	0.74036	0.44972	0.3958	0.43817	0.41132
880	0.093524	0.11093	0.10141	0.098186	0.1069	0.11047	0.12982	0.096197	0.093655	0.13479	0.12111	0.088371	0.13691	0.14735	0.16206	0.15461	0.14792	0.16383	0.12066	0.13403	0.14738	0.16074	0.18405	0.12698	0.13469	0.13061	0.21533	0.20576	0.22068	0.54062	0.22484	0.51963	0.20074	0.16021	0.22254	0.16802	0.18592	0.26592	0.36016	0.44965	0.34203	0.40907	0.71402	0.23791	0.68722	0.52136	0.45918	0.50999	0.47571
881	0.095572	0.11321	0.10361	0.10029	0.1091	0.11274	0.13237	0.098221	0.095493	0.13752	0.12363	0.08894	0.13979	0.15053	0.1658	0.15819	0.1511	0.16779	0.1232	0.13684	0.15069	0.16455	0.1891	0.12964	0.13756	0.13334	0.22479	0.21431	0.23152	0.4792	0.23653	0.60295	0.20676	0.16411	0.23052	0.17223	0.1911	0.2793	0.41004	0.51582	0.38712	0.4698	0.76734	0.25189	0.6322	0.60706	0.54234	0.59821	0.55633
882	0.097671	0.11553	0.10584	0.10243	0.11134	0.11505	0.13498	0.10031	0.097438	0.14033	0.1262	0.089975	0.14274	0.15382	0.16973	0.16194	0.15439	0.17197	0.12578	0.13973	0.15413	0.16857	0.19452	0.13237	0.14051	0.13613	0.23566	0.22411	0.24417	0.41902	0.25061	0.69288	0.21335	0.16822	0.23946	0.1767	0.19671	0.29503	0.4751	0.59303	0.44671	0.54455	0.79334	0.26867	0.57685	0.69939	0.64489	0.6962	0.6497
883	0.099811	0.11789	0.1081	0.10462	0.11363	0.1174	0.13765	0.10245	0.099463	0.14322	0.12883	0.091342	0.14579	0.15724	0.17386	0.16588	0.15781	0.1764	0.12843	0.1427	0.15771	0.1728	0.20039	0.13516	0.14356	0.139	0.2483	0.23548	0.25913	0.36055	0.268	0.77366	0.22063	0.17259	0.24961	0.18148	0.20282	0.31378	0.5574	0.67481	0.5241	0.63051	0.7923	0.28904	0.52216	0.78126	0.75407	0.78591	0.74251
884	0.10199	0.12029	0.1104	0.10684	0.11595	0.1198	0.14039	0.10463	0.10155	0.14618	0.13151	0.092945	0.14893	0.16079	0.17823	0.17005	0.16138	0.18114	0.13113	0.14577	0.16145	0.1773	0.20679	0.13802	0.14671	0.14195	0.26313	0.24886	0.277	0.30459	0.28998	0.82617	0.22875	0.17725	0.26128	0.18662	0.20956	0.33633	0.65382	0.74806	0.61902	0.71758	0.77095	0.31402	0.46867	0.83261	0.84186	0.84406	0.81309
885	0.10419	0.12274	0.11272	0.10909	0.1183	0.12223	0.14318	0.10685	0.10369	0.14923	0.13426	0.094719	0.15218	0.16451	0.18287	0.17447	0.1651	0.18623	0.1339	0.14894	0.16538	0.18208	0.21382	0.14097	0.14997	0.14499	0.28069	0.26485	0.29854	0.25239	0.31834	0.84134	0.23791	0.18228	0.27485	0.19219	0.21705	0.3636	0.75052	0.7974	0.72153	0.78842	0.73643	0.34486	0.41673	0.84514	0.88222	0.85977	0.84486
886	0.10643	0.12523	0.11508	0.11138	0.1207	0.12471	0.14605	0.1091	0.10586	0.15238	0.13707	0.096617	0.15555	0.1684	0.18782	0.17919	0.16902	0.19174	0.13673	0.15223	0.16952	0.18721	0.2216	0.14401	0.15336	0.14813	0.30171	0.28424	0.32475	0.20569	0.35562	0.82579	0.24833	0.18772	0.29079	0.19828	0.22549	0.39637	0.82351	0.81503	0.8083	0.82711	0.69375	0.38309	0.36656	0.82701	0.87615	0.84204	0.83959
887	0.10869	0.12776	0.11747	0.11369	0.12313	0.12724	0.149	0.11139	0.10808	0.15563	0.13996	0.098606	0.15906	0.17249	0.19314	0.18426	0.17314	0.19775	0.13965	0.15564	0.17389	0.19274	0.23031	0.14715	0.15691	0.15138	0.32709	0.30814	0.35688	0.16627	0.40511	0.79086	0.26027	0.19369	0.30962	0.20498	0.23507	0.43496	0.85494	0.80487	0.85508	0.831	0.64629	0.43041	0.3185	0.79008	0.84258	0.80452	0.81002
888	0.11098	0.13034	0.1199	0.11604	0.12561	0.12981	0.15203	0.11371	0.11033	0.15901	0.14294	0.10066	0.16272	0.17682	0.19891	0.18974	0.1775	0.20435	0.14265	0.1592	0.17854	0.19876	0.24015	0.1504	0.16061	0.15475	0.35801	0.33809	0.39651	0.13521	0.47057	0.74461	0.274	0.20027	0.33187	0.21242	0.24606	0.47878	0.84767	0.77545	0.85803	0.80864	0.59611	0.48824	0.27315	0.74232	0.79439	0.75585	0.7663
889	0.1133	0.13298	0.12237	0.11842	0.12813	0.13244	0.15514	0.11607	0.1126	0.16251	0.146	0.10278	0.16655	0.18141	0.2052	0.19571	0.18214	0.21163	0.14575	0.16293	0.18352	0.20535	0.25142	0.15377	0.16451	0.15827	0.39591	0.37615	0.4453	0.1123	0.55438	0.69236	0.28978	0.20761	0.358	0.22072	0.25873	0.52587	0.81539	0.73403	0.83079	0.76977	0.54442	0.55663	0.23143	0.68889	0.73883	0.70157	0.71491
890	0.11565	0.13567	0.12488	0.12084	0.13069	0.13512	0.15835	0.11846	0.11491	0.16616	0.14917	0.10493	0.17057	0.18632	0.21213	0.20224	0.18709	0.21971	0.14896	0.16684	0.18887	0.21266	0.26451	0.15728	0.16861	0.16194	0.44231	0.42494	0.50457	0.096239	0.65319	0.63716	0.3079	0.21588	0.38835	0.23005	0.27345	0.57282	0.76917	0.68564	0.78686	0.72136	0.49198	0.63229	0.19448	0.6327	0.68018	0.64473	0.65974
891	0.11804	0.13842	0.12744	0.1233	0.13331	0.13786	0.16167	0.12088	0.11726	0.16997	0.15244	0.10713	0.17483	0.19161	0.21985	0.20945	0.19241	0.22873	0.15228	0.17097	0.19467	0.22084	0.27989	0.16095	0.17296	0.16578	0.49832	0.48721	0.57398	0.085388	0.75175	0.58068	0.32861	0.22527	0.42302	0.2406	0.29061	0.61512	0.71542	0.63337	0.73385	0.66773	0.43937	0.70633	0.16332	0.57533	0.62034	0.58687	0.60286
892	0.12046	0.14124	0.13005	0.12579	0.13598	0.14067	0.1651	0.12335	0.11964	0.17397	0.15584	0.10936	0.17934	0.19734	0.22856	0.21744	0.19814	0.23887	0.15573	0.17533	0.20101	0.23011	0.29821	0.1648	0.17759	0.16983	0.56349	0.5644	0.6494	0.078309	0.82497	0.5239	0.35215	0.23606	0.46167	0.25259	0.31067	0.64816	0.65791	0.57908	0.67625	0.61138	0.38714	0.76523	0.13841	0.51773	0.56035	0.52891	0.54541
893	0.12291	0.14413	0.13271	0.12834	0.1387	0.14355	0.16866	0.12586	0.12205	0.17816	0.15938	0.11162	0.18417	0.20362	0.23851	0.22639	0.20437	0.25032	0.15933	0.17997	0.20801	0.24076	0.32018	0.16884	0.18253	0.17411	0.63393	0.65325	0.72104	0.073914	0.85518	0.46744	0.37865	0.2486	0.50325	0.2663	0.33417	0.66853	0.59873	0.52392	0.61662	0.55376	0.33601	0.79738	0.11946	0.46049	0.50081	0.4714	0.48811
894	0.12541	0.1471	0.13543	0.13093	0.14149	0.1465	0.17235	0.12842	0.1245	0.18259	0.16307	0.11392	0.18936	0.21055	0.24999	0.23649	0.21117	0.26335	0.16309	0.18492	0.21582	0.25312	0.34659	0.17311	0.18785	0.17865	0.70072	0.74118	0.77521	0.071419	0.84696	0.41175	0.40812	0.26334	0.54577	0.28207	0.36163	0.67506	0.53898	0.46864	0.55624	0.49577	0.28693	0.80081	0.1056	0.40413	0.44214	0.41476	0.43145
895	0.12795	0.15015	0.13821	0.13357	0.14435	0.14954	0.1762	0.13102	0.12699	0.18727	0.16694	0.11624	0.19498	0.21829	0.2634	0.24798	0.21866	0.27824	0.16703	0.19025	0.22461	0.26761	0.37806	0.17764	0.1936	0.18349	0.75164	0.80767	0.80188	0.070274	0.81445	0.35737	0.44029	0.28088	0.58623	0.30029	0.39354	0.66867	0.47937	0.41384	0.49587	0.43806	0.24122	0.78151	0.095773	0.34922	0.38473	0.35949	0.37593
896	0.13054	0.1533	0.14106	0.13626	0.14728	0.15267	0.18021	0.13368	0.12952	0.19226	0.171	0.1186	0.20112	0.22702	0.27915	0.26119	0.22696	0.29535	0.17119	0.19602	0.23461	0.28472	0.41486	0.18247	0.19985	0.18869	0.77754	0.83755	0.80062	0.070092	0.76801	0.30505	0.47449	0.30199	0.62101	0.32145	0.43012	0.65153	0.42046	0.36013	0.43611	0.38127	0.2004	0.74697	0.088995	0.29663	0.32922	0.30634	0.32223
897	0.13319	0.15654	0.14399	0.13902	0.15029	0.1559	0.18442	0.13639	0.1321	0.1976	0.17529	0.121	0.2079	0.23697	0.29777	0.27649	0.23624	0.31511	0.17559	0.20229	0.24612	0.305	0.45661	0.18766	0.20671	0.19432	0.77743	0.83218	0.77785	0.070598	0.71421	0.25593	0.5096	0.32765	0.64671	0.34603	0.47117	0.62612	0.36289	0.30834	0.37756	0.32622	0.1659	0.70307	0.084474	0.24759	0.27658	0.25645	0.2714
898	0.13588	0.1599	0.147	0.14184	0.15339	0.15924	0.18883	0.13917	0.13473	0.20333	0.17983	0.12342	0.21545	0.2484	0.31983	0.2944	0.2467	0.33797	0.18026	0.20919	0.25948	0.32908	0.50211	0.19325	0.2143	0.20044	0.75671	0.8028	0.74092	0.071597	0.65672	0.21152	0.54391	0.35905	0.66107	0.37457	0.51564	0.59472	0.30758	0.25961	0.32107	0.27407	0.13848	0.65373	0.081617	0.20371	0.22828	0.21136	0.22489
899	0.13864	0.16337	0.1501	0.14473	0.15658	0.1627	0.19349	0.14202	0.13742	0.20954	0.18467	0.12589	0.22394	0.26169	0.34601	0.31551	0.25861	0.3644	0.18526	0.21683	0.27517	0.35769	0.54915	0.19934	0.22275	0.20717	0.7221	0.75939	0.69537	0.072947	0.59747	0.17343	0.57531	0.39755	0.66355	0.40749	0.56138	0.55918	0.25585	0.21543	0.26788	0.22639	0.1179	0.60133	0.079992	0.16658	0.18606	0.17273	0.18435
900	0.14146	0.16699	0.1533	0.1477	0.15988	0.16628	0.19841	0.14493	0.14016	0.21631	0.18986	0.1284	0.23361	0.27732	0.37705	0.34056	0.27229	0.39484	0.19063	0.22537	0.29379	0.39157	0.59447	0.20602	0.23226	0.21463	0.67882	0.7082	0.64486	0.074546	0.53759	0.14274	0.60152	0.44443	0.65509	0.44499	0.60499	0.52094	0.20943	0.17737	0.21966	0.18493	0.10318	0.54738	0.079286	0.13713	0.1514	0.1417	0.15112
901	0.14436	0.17075	0.1566	0.15076	0.16328	0.17002	0.20365	0.14793	0.14296	0.22374	0.19546	0.13096	0.24478	0.29589	0.41367	0.37035	0.28814	0.42955	0.19645	0.23503	0.31615	0.43139	0.6341	0.21341	0.24308	0.22298	0.63045	0.65303	0.59168	0.076322	0.47778	0.11955	0.6206	0.50034	0.63754	0.48676	0.64227	0.48111	0.17007	0.14652	0.17824	0.15108	0.093051	0.49282	0.079274	0.1152	0.12483	0.11832	0.1256
902	0.14733	0.17468	0.16003	0.1539	0.16682	0.17392	0.20924	0.15101	0.14583	0.23197	0.20154	0.13356	0.25786	0.3182	0.45629	0.40571	0.30666	0.46844	0.2028	0.24606	0.34323	0.47738	0.66418	0.22168	0.25548	0.23244	0.57929	0.59601	0.53722	0.078224	0.41862	0.10292	0.63134	0.56421	0.61296	0.53163	0.66923	0.44059	0.13889	0.12305	0.14497	0.12524	0.086328	0.43833	0.079792	0.099667	0.10562	0.10163	0.10708
903	0.15038	0.17879	0.16358	0.15715	0.17049	0.178	0.21524	0.15418	0.14877	0.24117	0.20819	0.13621	0.27344	0.34523	0.50461	0.44724	0.3284	0.51076	0.2098	0.25882	0.37623	0.52882	0.68209	0.23102	0.26988	0.24331	0.52682	0.53838	0.48238	0.080215	0.3608	0.091464	0.63349	0.63163	0.58323	0.57728	0.68337	0.40015	0.11577	0.10611	0.11999	0.10662	0.082098	0.38455	0.080714	0.089076	0.092335	0.09017	0.094206
904	0.15353	0.18312	0.16729	0.1605	0.17431	0.18228	0.22172	0.15746	0.15179	0.25153	0.21556	0.13891	0.29228	0.37808	0.55699	0.49492	0.35401	0.55478	0.21759	0.27373	0.41642	0.58338	0.68715	0.24172	0.28673	0.25596	0.47399	0.48087	0.42783	0.082271	0.30527	0.083852	0.62762	0.69403	0.54993	0.62008	0.68429	0.36048	0.099485	0.094377	0.10226	0.093759	0.079672	0.33219	0.081945	0.082117	0.083456	0.082577	0.085564
905	0.15677	0.18768	0.17115	0.16397	0.17831	0.1868	0.22876	0.16085	0.1549	0.26331	0.22378	0.14168	0.31543	0.41787	0.60975	0.5474	0.38411	0.59757	0.22636	0.29135	0.46484	0.63652	0.68042	0.25414	0.30664	0.2709	0.42153	0.42406	0.37421	0.084373	0.25345	0.079031	0.61481	0.74061	0.51429	0.65565	0.67333	0.3223	0.08845	0.086544	0.090173	0.085201	0.078547	0.28227	0.083413	0.07778	0.077764	0.077782	0.080005
906	0.16013	0.19251	0.17521	0.16758	0.18249	0.19158	0.23645	0.16436	0.15809	0.27682	0.23306	0.1445	0.34423	0.46532	0.65728	0.60135	0.41911	0.63524	0.23636	0.31238	0.52156	0.68201	0.66384	0.26875	0.33032	0.28879	0.37007	0.36853	0.32225	0.086511	0.20711	0.076204	0.59631	0.76378	0.47725	0.68009	0.6526	0.2863	0.081245	0.081555	0.082222	0.079748	0.078357	0.23608	0.085061	0.075309	0.07434	0.074982	0.076653
907	0.1636	0.19766	0.17946	0.17134	0.1869	0.19666	0.24493	0.16801	0.16139	0.29241	0.24368	0.1474	0.38033	0.52	0.69346	0.65121	0.45895	0.6638	0.24791	0.33761	0.58433	0.71387	0.63956	0.28618	0.35857	0.31054	0.32036	0.31506	0.27301	0.088677	0.16798	0.074809	0.57331	0.7629	0.43954	0.6912	0.6243	0.25317	0.07678	0.078615	0.077235	0.076513	0.078843	0.19519	0.086848	0.074175	0.072533	0.073611	0.074882
908	0.16721	0.20316	0.18396	0.17526	0.19154	0.20208	0.25433	0.17181	0.1648	0.31047	0.25595	0.15037	0.4255	0.57957	0.71376	0.69053	0.50278	0.68027	0.26147	0.36795	0.64785	0.72844	0.60952	0.30724	0.39222	0.33724	0.27333	0.26472	0.22781	0.090868	0.13711	0.074431	0.54686	0.74213	0.4017	0.68878	0.59042	0.22351	0.074241	0.077135	0.074331	0.074843	0.079811	0.16095	0.088742	0.07399	0.071872	0.073255	0.074235
909	0.17097	0.20907	0.18872	0.17936	0.19647	0.2079	0.26482	0.17578	0.16833	0.33143	0.27034	0.15341	0.48118	0.63894	0.71678	0.71401	0.54855	0.68351	0.27761	0.40427	0.70365	0.72558	0.57531	0.33296	0.43195	0.37026	0.23016	0.21897	0.18818	0.093081	0.11434	0.07478	0.51781	0.70756	0.36423	0.67437	0.55254	0.1978	0.073062	0.076698	0.072894	0.074281	0.081125	0.13406	0.090719	0.074482	0.072027	0.073625	0.074391
910	0.17489	0.21545	0.19378	0.18367	0.20171	0.21418	0.27658	0.17993	0.17199	0.3557	0.28741	0.15655	0.54722	0.6905	0.70437	0.71964	0.59289	0.67436	0.29715	0.44719	0.74269	0.70807	0.53814	0.36464	0.47805	0.4111	0.19222	0.17943	0.15539	0.095315	0.098422	0.075655	0.48682	0.66439	0.3276	0.65043	0.51189	0.17626	0.072858	0.077011	0.072506	0.074515	0.082689	0.11415	0.092765	0.075461	0.072769	0.074516	0.075126
911	0.179	0.2224	0.1992	0.18821	0.20731	0.22099	0.28986	0.18429	0.17579	0.38367	0.30794	0.15977	0.61997	0.7266	0.67996	0.70895	0.63152	0.65491	0.32114	0.49662	0.75971	0.67968	0.49896	0.40372	0.52983	0.46108	0.1606	0.14731	0.12992	0.097571	0.087704	0.076906	0.45443	0.61597	0.29236	0.61941	0.46945	0.15883	0.073352	0.077865	0.07287	0.075319	0.084433	0.10012	0.094866	0.076789	0.073933	0.075784	0.076278
912	0.18332	0.23	0.20503	0.19302	0.21334	0.22842	0.30491	0.18889	0.17976	0.41554	0.3329	0.16309	0.6907	0.74266	0.64698	0.68543	0.66031	0.62756	0.35099	0.55113	0.75513	0.64378	0.45853	0.45159	0.58502	0.52052	0.13575	0.12285	0.11125	0.099851	0.080737	0.078428	0.42113	0.56441	0.25913	0.58335	0.42599	0.14515	0.074341	0.079106	0.073767	0.076528	0.086308	0.090607	0.097017	0.078367	0.075398	0.077319	0.077728
913	0.18786	0.23836	0.21133	0.19813	0.21986	0.23659	0.32203	0.19375	0.1839	0.45129	0.36354	0.16653	0.74701	0.73847	0.60822	0.65286	0.67638	0.59453	0.38844	0.60739	0.73343	0.60295	0.4175	0.50897	0.63931	0.58759	0.11732	0.10531	0.098193	0.10216	0.076406	0.080142	0.38733	0.51112	0.22858	0.54387	0.38223	0.13471	0.075682	0.080621	0.075042	0.078022	0.088278	0.084385	0.099212	0.080123	0.077075	0.079044	0.079389
914	0.19268	0.24764	0.2182	0.20358	0.22695	0.24562	0.34155	0.19891	0.18825	0.49038	0.40135	0.17008	0.77803	0.71799	0.56556	0.61425	0.67915	0.55756	0.43544	0.65953	0.70042	0.55893	0.37645	0.57445	0.68627	0.6562	0.10421	0.093217	0.089383	0.10449	0.073965	0.081996	0.3535	0.45708	0.20138	0.50214	0.33892	0.12692	0.077274	0.082336	0.076588	0.079723	0.09032	0.08055	0.10145	0.082006	0.078906	0.080908	0.081203
915	0.19779	0.25801	0.22573	0.20944	0.23472	0.25568	0.3638	0.20442	0.19281	0.53157	0.44785	0.17375	0.78072	0.68581	0.52035	0.57173	0.66977	0.51798	0.49353	0.70056	0.66034	0.51301	0.33598	0.64311	0.71934	0.71626	0.095229	0.08516	0.083668	0.10685	0.072864	0.083951	0.3201	0.40312	0.17803	0.45907	0.29689	0.12123	0.079046	0.084193	0.078327	0.081571	0.092417	0.078426	0.10373	0.083983	0.080846	0.08287	0.083128
916	0.20326	0.26967	0.23407	0.21577	0.2433	0.26698	0.38908	0.21033	0.19763	0.57269	0.50392	0.17757	0.76038	0.64564	0.47358	0.5268	0.65049	0.47678	0.56241	0.72485	0.61586	0.46609	0.29676	0.7055	0.73446	0.75687	0.089307	0.080027	0.080195	0.10925	0.072719	0.08598	0.28769	0.35011	0.15872	0.41542	0.25716	0.11717	0.080945	0.086152	0.080201	0.083524	0.094559	0.077533	0.10604	0.086027	0.082866	0.084906	0.085133
917	0.20913	0.28289	0.24337	0.22264	0.25284	0.27974	0.41754	0.2167	0.20273	0.61066	0.56865	0.18155	0.72455	0.60018	0.42602	0.48054	0.62362	0.43471	0.63784	0.73022	0.56879	0.41887	0.25957	0.7506	0.73125	0.77191	0.085606	0.07698	0.078326	0.11168	0.073249	0.088065	0.25687	0.29908	0.14336	0.37183	0.22085	0.11437	0.082934	0.088187	0.082173	0.085552	0.096738	0.077518	0.1084	0.088123	0.084943	0.086995	0.087198
918	0.21548	0.29797	0.25384	0.23017	0.26352	0.29426	0.44904	0.22361	0.20815	0.64186	0.63726	0.18569	0.67923	0.55126	0.37837	0.43374	0.59117	0.3924	0.70951	0.71846	0.52024	0.37195	0.22529	0.77129	0.71262	0.76299	0.083511	0.075427	0.077609	0.11416	0.074265	0.090194	0.2283	0.25141	0.13152	0.32899	0.18906	0.11254	0.084989	0.090278	0.084214	0.087636	0.09895	0.078135	0.11081	0.090259	0.087064	0.089127	0.089308
919	0.22238	0.31524	0.26575	0.23848	0.2756	0.31084	0.48298	0.23115	0.21395	0.66298	0.70054	0.19002	0.62827	0.50026	0.33142	0.38705	0.55472	0.35043	0.76387	0.69325	0.47097	0.326	0.1948	0.76731	0.68242	0.73596	0.082565	0.074937	0.077714	0.11667	0.075624	0.092358	0.20263	0.20867	0.12269	0.28771	0.16256	0.11146	0.087093	0.092412	0.086307	0.089763	0.10119	0.079201	0.11325	0.092428	0.089219	0.091292	0.091455
920	0.22995	0.33507	0.27942	0.24772	0.28933	0.32983	0.51806	0.23944	0.22017	0.672	0.74696	0.19455	0.57398	0.44815	0.28616	0.34116	0.51546	0.30949	0.79068	0.65845	0.42154	0.28187	0.16881	0.74411	0.64418	0.69713	0.082446	0.075209	0.078409	0.11924	0.077227	0.094553	0.18036	0.17239	0.1163	0.24894	0.14158	0.11096	0.089233	0.094581	0.088438	0.091924	0.10347	0.080591	0.11575	0.094625	0.091404	0.093487	0.093633
921	0.23831	0.35781	0.29525	0.25808	0.30504	0.35159	0.55225	0.24863	0.2269	0.66862	0.76858	0.19932	0.51787	0.39582	0.24384	0.29686	0.47429	0.27038	0.78885	0.61714	0.37247	0.24067	0.14764	0.70798	0.60053	0.651	0.082923	0.076026	0.079525	0.12187	0.079004	0.096776	0.16174	0.14346	0.11186	0.21375	0.12576	0.11094	0.091404	0.096779	0.090599	0.094113	0.10577	0.082211	0.1183	0.096849	0.093614	0.095709	0.095838
922	0.24764	0.38377	0.31375	0.2698	0.3231	0.37642	0.58297	0.25889	0.23421	0.65396	0.76473	0.20434	0.46102	0.34421	0.20583	0.25515	0.43193	0.23408	0.76465	0.57154	0.32445	0.20366	0.13116	0.66377	0.55335	0.60043	0.083829	0.077231	0.080941	0.12455	0.080904	0.099026	0.14676	0.12181	0.10893	0.18317	0.11434	0.11129	0.0936	0.099004	0.092786	0.096328	0.1081	0.083996	0.1209	0.099099	0.095847	0.097957	0.09807
923	0.25815	0.41313	0.33553	0.28318	0.34392	0.40454	0.6075	0.27045	0.24221	0.63004	0.74087	0.20964	0.40432	0.29447	0.17339	0.21721	0.38904	0.20161	0.72612	0.52316	0.27841	0.17199	0.11882	0.61454	0.50397	0.54724	0.085049	0.078713	0.082573	0.1273	0.082891	0.1013	0.13514	0.10642	0.10718	0.15786	0.10643	0.11196	0.095819	0.10126	0.094996	0.098567	0.11047	0.0859	0.12357	0.10138	0.098105	0.10023	0.10033
924	0.27009	0.44586	0.3613	0.29858	0.36791	0.43598	0.62368	0.28357	0.25103	0.59901	0.70364	0.21527	0.34874	0.24803	0.14727	0.1842	0.34633	0.17385	0.67923	0.47317	0.23559	0.14635	0.10994	0.56231	0.45338	0.49267	0.086499	0.080392	0.084358	0.13013	0.084942	0.10361	0.12643	0.095957	0.10634	0.13796	0.10119	0.1129	0.098061	0.10353	0.097228	0.10083	0.11288	0.08789	0.1263	0.10368	0.10039	0.10253	0.10261
925	0.28384	0.4815	0.39187	0.31647	0.39548	0.47041	0.63045	0.2986	0.26084	0.56279	0.65821	0.22126	0.2955	0.2065	0.12736	0.15691	0.30464	0.15123	0.62739	0.42246	0.19742	0.12668	0.10381	0.50837	0.40243	0.43765	0.088122	0.082213	0.086255	0.13303	0.08704	0.10594	0.12015	0.089122	0.10621	0.12301	0.097958	0.11407	0.10033	0.10584	0.099482	0.10312	0.11533	0.089945	0.12911	0.10601	0.1027	0.10486	0.10492
926	0.29982	0.5191	0.42799	0.33739	0.4269	0.50708	0.6278	0.31596	0.27184	0.52297	0.60796	0.22765	0.24612	0.17132	0.11297	0.13557	0.26498	0.13369	0.57278	0.37191	0.16512	0.11232	0.099784	0.45372	0.352	0.38303	0.089875	0.084137	0.088235	0.13603	0.089174	0.10831	0.11581	0.084886	0.10663	0.11226	0.096193	0.11545	0.10262	0.10818	0.10176	0.10544	0.11781	0.092049	0.13199	0.10838	0.10503	0.10722	0.10727
927	0.31862	0.55702	0.47018	0.36197	0.46215	0.54458	0.61663	0.33616	0.28431	0.48083	0.55494	0.23451	0.20234	0.14334	0.10302	0.11972	0.22847	0.12071	0.51676	0.32249	0.13937	0.1023	0.097361	0.39921	0.30312	0.32979	0.09173	0.086135	0.090277	0.13913	0.091337	0.11071	0.11302	0.082492	0.10747	0.10485	0.095498	0.11699	0.10493	0.11055	0.10406	0.10778	0.12035	0.094193	0.13497	0.11077	0.1074	0.10962	0.10964
928	0.34095	0.5929	0.51821	0.39091	0.50071	0.58079	0.5984	0.35979	0.29856	0.43736	0.50044	0.24191	0.16573	0.12243	0.096425	0.10846	0.19621	0.11147	0.46023	0.27539	0.12001	0.095573	0.096137	0.34571	0.25708	0.27913	0.093666	0.08819	0.092367	0.14233	0.093524	0.11316	0.11141	0.08141	0.10864	0.099954	0.095584	0.11869	0.10728	0.11295	0.10639	0.11016	0.12293	0.096371	0.13804	0.11321	0.10981	0.11205	0.11205
929	0.36771	0.62391	0.57048	0.42487	0.54127	0.61302	0.57471	0.3875	0.31503	0.39343	0.4454	0.24993	0.13709	0.10764	0.092268	0.10075	0.16904	0.10515	0.40399	0.23202	0.10616	0.091265	0.095806	0.29433	0.21535	0.23257	0.095669	0.090289	0.094499	0.14567	0.095734	0.11564	0.11073	0.081267	0.11006	0.096934	0.096243	0.12052	0.10965	0.1154	0.10875	0.11257	0.12558	0.098579	0.14122	0.11569	0.11225	0.11452	0.1145
930	0.39992	0.64723	0.62329	0.46422	0.58152	0.63848	0.54699	0.4199	0.33422	0.34987	0.3907	0.25866	0.11613	0.097637	0.089878	0.095687	0.1473	0.10103	0.3489	0.19386	0.096628	0.088723	0.09614	0.24649	0.1794	0.19177	0.097729	0.092425	0.096666	0.14914	0.097967	0.11817	0.11075	0.081794	0.11169	0.095295	0.09732	0.12247	0.11206	0.1179	0.11115	0.11503	0.12828	0.10082	0.14451	0.11821	0.11473	0.11704	0.11699
931	0.43857	0.66075	0.6709	0.50872	0.61821	0.65484	0.51639	0.45738	0.35675	0.30757	0.33729	0.26822	0.1016	0.091124	0.088768	0.092563	0.13074	0.098543	0.29609	0.16211	0.09031	0.087471	0.096967	0.20384	0.15021	0.15809	0.099838	0.094594	0.098867	0.15277	0.10022	0.12075	0.11131	0.082801	0.11348	0.094674	0.098705	0.12453	0.11451	0.12044	0.11358	0.11752	0.13105	0.10309	0.14794	0.12078	0.11726	0.11961	0.11953
932	0.4843	0.66353	0.70677	0.55695	0.6477	0.66083	0.48383	0.49979	0.38332	0.26751	0.28633	0.27875	0.091929	0.087102	0.088586	0.090861	0.11867	0.097272	0.24699	0.13728	0.086322	0.087161	0.09816	0.16791	0.12795	0.13207	0.10199	0.096792	0.1011	0.15659	0.1025	0.12338	0.11229	0.084148	0.11541	0.0948	0.10032	0.12669	0.11701	0.12304	0.11605	0.12007	0.13389	0.10538	0.15151	0.12341	0.11983	0.12223	0.12212
933	0.53672	0.65588	0.72588	0.60585	0.66685	0.65645	0.45001	0.54596	0.41463	0.23078	0.23929	0.29044	0.085721	0.084857	0.089073	0.0902	0.11021	0.096902	0.2033	0.11896	0.084029	0.087537	0.099625	0.13953	0.1119	0.11317	0.10419	0.099018	0.10336	0.16061	0.1048	0.12608	0.11358	0.085737	0.11745	0.095476	0.1021	0.12894	0.11955	0.1257	0.11856	0.12266	0.13682	0.10771	0.15526	0.1261	0.12247	0.12491	0.12477
934	0.59346	0.63907	0.72654	0.65069	0.6739	0.6427	0.41549	0.59327	0.45117	0.19841	0.19779	0.30349	0.081943	0.083885	0.090042	0.090302	0.10452	0.0972	0.1666	0.10612	0.082972	0.08841	0.1013	0.11851	0.10086	0.10014	0.10643	0.10127	0.10566	0.16487	0.10713	0.12884	0.11512	0.087502	0.11958	0.096555	0.10401	0.13127	0.12214	0.12842	0.12112	0.12531	0.13984	0.11008	0.15918	0.12885	0.12516	0.12766	0.12748
935	0.64936	0.61481	0.7106	0.68591	0.66878	0.62119	0.38075	0.63753	0.49297	0.17121	0.16324	0.31816	0.079885	0.083826	0.091357	0.090962	0.10089	0.097994	0.13773	0.097482	0.082818	0.089644	0.10312	0.10376	0.09355	0.091484	0.10871	0.10356	0.10799	0.16941	0.1095	0.13168	0.11686	0.089392	0.12179	0.097933	0.10602	0.13369	0.12478	0.13122	0.12374	0.12803	0.14295	0.11248	0.16332	0.13168	0.12792	0.13048	0.13025
936	0.69709	0.5848	0.6819	0.70674	0.65281	0.5936	0.34628	0.67367	0.53916	0.14951	0.13634	0.33477	0.079046	0.084411	0.092919	0.092028	0.098801	0.099155	0.11653	0.091888	0.083312	0.091139	0.10507	0.093852	0.08892	0.085939	0.11104	0.10588	0.11036	0.17428	0.11189	0.1346	0.11876	0.091375	0.12409	0.099533	0.10811	0.13618	0.12749	0.1341	0.12642	0.13081	0.14618	0.11493	0.16771	0.13458	0.13075	0.13337	0.13311
937	0.72877	0.55048	0.64467	0.71115	0.62825	0.56144	0.31263	0.69703	0.58716	0.13301	0.1166	0.3537	0.079096	0.085463	0.094666	0.093397	0.097854	0.10059	0.10171	0.0885	0.084282	0.092831	0.10712	0.087402	0.086232	0.08262	0.11341	0.10823	0.11277	0.17954	0.11432	0.1376	0.12079	0.093429	0.12645	0.1013	0.11027	0.13876	0.13027	0.13707	0.12916	0.13367	0.14953	0.11742	0.17237	0.13757	0.13366	0.13636	0.13604
938	0.74	0.51303	0.60185	0.70006	0.59713	0.52589	0.28037	0.7052	0.63274	0.121	0.10283	0.37538	0.079773	0.086844	0.096548	0.094991	0.097753	0.10225	0.091726	0.086702	0.085596	0.094668	0.10924	0.083427	0.084942	0.080892	0.11582	0.11062	0.11523	0.18528	0.11679	0.14071	0.12294	0.095537	0.12889	0.10321	0.11249	0.14143	0.13313	0.14014	0.13197	0.13661	0.15303	0.11995	0.17737	0.14067	0.13667	0.13944	0.13907
939	0.73112	0.47338	0.5554	0.67636	0.56114	0.48791	0.25016	0.69848	0.67047	0.11261	0.093571	0.4003	0.080887	0.088459	0.09853	0.096753	0.098268	0.10406	0.085243	0.086041	0.087155	0.096614	0.11144	0.081222	0.084647	0.080295	0.11828	0.11305	0.11773	0.19161	0.11931	0.14393	0.12518	0.097689	0.1314	0.10521	0.11477	0.14418	0.13606	0.14331	0.13486	0.13965	0.15668	0.12254	0.18274	0.14387	0.13977	0.14264	0.14219
940	0.70667	0.43229	0.50664	0.64343	0.52162	0.44826	0.22264	0.67949	0.6952	0.10698	0.087596	0.42898	0.082314	0.090242	0.10059	0.098644	0.09924	0.106	0.081273	0.0862	0.088895	0.098645	0.11369	0.080292	0.085069	0.080507	0.1208	0.11552	0.12028	0.19868	0.12187	0.14727	0.12751	0.09988	0.13397	0.10731	0.1171	0.14702	0.1391	0.14662	0.13784	0.1428	0.16051	0.12519	0.18857	0.14719	0.14298	0.14595	0.14544
941	0.67123	0.39046	0.45661	0.60393	0.47961	0.40762	0.19834	0.65113	0.7043	0.10343	0.083985	0.46183	0.083964	0.092148	0.10271	0.10064	0.10055	0.10804	0.079094	0.086941	0.090768	0.10074	0.116	0.080267	0.086	0.081293	0.12336	0.11804	0.12288	0.2067	0.12448	0.15075	0.12993	0.1021	0.13662	0.10947	0.11948	0.14996	0.14223	0.15006	0.14092	0.14606	0.16456	0.1279	0.19496	0.15065	0.14632	0.1494	0.1488
942	0.62841	0.3486	0.40619	0.55991	0.43602	0.36662	0.17762	0.61596	0.69808	0.1014	0.082051	0.49899	0.085771	0.094145	0.10489	0.10271	0.10211	0.11017	0.078182	0.088099	0.09274	0.1029	0.11836	0.080882	0.087295	0.082484	0.12599	0.12061	0.12555	0.21598	0.12716	0.1544	0.13243	0.10436	0.13934	0.1117	0.12191	0.153	0.14549	0.15365	0.14411	0.14945	0.16885	0.13069	0.20202	0.15427	0.1498	0.15301	0.15231
943	0.58082	0.30752	0.35621	0.51291	0.39165	0.32597	0.16056	0.576	0.67883	0.10049	0.081308	0.53997	0.087691	0.096209	0.10711	0.10485	0.10385	0.11237	0.078169	0.089553	0.094788	0.1051	0.12078	0.081952	0.088851	0.083965	0.12869	0.12323	0.12828	0.22696	0.1299	0.15822	0.135	0.10665	0.14215	0.11399	0.12439	0.15614	0.14887	0.15743	0.14742	0.153	0.17344	0.13354	0.20994	0.15806	0.15344	0.15678	0.15599
944	0.53028	0.26818	0.30766	0.4641	0.34731	0.28651	0.14699	0.53277	0.64951	0.10038	0.08141	0.58326	0.089693	0.098327	0.10937	0.10704	0.10574	0.11464	0.078795	0.091222	0.096896	0.10735	0.12324	0.083347	0.090594	0.085651	0.13145	0.12592	0.13109	0.24025	0.1327	0.16224	0.13765	0.10897	0.14503	0.11633	0.12693	0.1594	0.1524	0.16142	0.15088	0.15671	0.17837	0.13649	0.21894	0.16206	0.15725	0.16076	0.15984
945	0.47804	0.23167	0.26174	0.41441	0.30396	0.24924	0.13651	0.48737	0.61286	0.10087	0.082112	0.62587	0.091756	0.10049	0.11166	0.10929	0.10773	0.11696	0.079874	0.093045	0.099052	0.10964	0.12576	0.084972	0.092473	0.087484	0.13429	0.12868	0.13398	0.25681	0.13559	0.16651	0.14038	0.11133	0.148	0.11872	0.12952	0.16278	0.15611	0.16566	0.15449	0.16063	0.18373	0.13953	0.22935	0.16629	0.16127	0.16497	0.16391
946	0.42511	0.19915	0.21994	0.36478	0.26272	0.21525	0.12867	0.44066	0.57105	0.10178	0.083238	0.66346	0.093865	0.10269	0.114	0.11158	0.10981	0.11934	0.081275	0.094983	0.10125	0.11196	0.12833	0.086762	0.094453	0.089424	0.13721	0.13151	0.13696	0.27806	0.13856	0.17106	0.1432	0.11372	0.15107	0.12116	0.13217	0.16629	0.16001	0.17017	0.15828	0.16478	0.1896	0.14268	0.24166	0.1708	0.16553	0.16945	0.16823
947	0.3724	0.17153	0.18373	0.31623	0.22487	0.18558	0.12299	0.3934	0.52573	0.10301	0.084667	0.69127	0.096011	0.10492	0.11638	0.11392	0.11196	0.12177	0.082904	0.097005	0.10349	0.11433	0.13096	0.088671	0.09651	0.091442	0.14023	0.13442	0.14003	0.30624	0.14162	0.17595	0.14609	0.11615	0.15424	0.12366	0.13489	0.16995	0.16414	0.17502	0.16228	0.1692	0.19611	0.14594	0.25658	0.17564	0.17006	0.17425	0.17283
948	0.32097	0.14926	0.15415	0.27002	0.19168	0.16093	0.11904	0.34641	0.47814	0.10447	0.086311	0.70572	0.098189	0.10718	0.11879	0.1163	0.11417	0.12425	0.084696	0.099092	0.10576	0.11674	0.13366	0.090667	0.098626	0.093519	0.14335	0.13743	0.14322	0.34483	0.1448	0.18124	0.14907	0.11862	0.15751	0.12621	0.13767	0.17376	0.16854	0.18028	0.16653	0.17395	0.20342	0.14934	0.27517	0.18088	0.17493	0.17943	0.17779
949	0.27212	0.1322	0.13142	0.22766	0.16408	0.14147	0.11647	0.30065	0.42928	0.10611	0.088108	0.70563	0.1004	0.10948	0.12125	0.11872	0.11643	0.12679	0.086604	0.10123	0.10806	0.11919	0.13642	0.092727	0.10079	0.095642	0.14658	0.14053	0.14654	0.39916	0.14809	0.18703	0.15215	0.12113	0.16091	0.12882	0.14053	0.17776	0.17326	0.18601	0.17108	0.17908	0.21174	0.15289	0.29904	0.18662	0.18019	0.18508	0.18317
950	0.22746	0.11972	0.11488	0.19066	0.14238	0.12683	0.11499	0.25735	0.38009	0.10788	0.090015	0.69216	0.10263	0.11181	0.12375	0.1212	0.11874	0.12939	0.088597	0.10341	0.11041	0.12169	0.13925	0.094838	0.103	0.097802	0.14994	0.14376	0.14999	0.47648	0.15151	0.19346	0.15533	0.1237	0.16443	0.13149	0.14346	0.18195	0.17836	0.19234	0.17596	0.18469	0.22136	0.15662	0.33053	0.19297	0.18593	0.19131	0.18907
951	0.18862	0.11099	0.10338	0.16017	0.12617	0.11628	0.11436	0.21791	0.33157	0.10977	0.092004	0.66777	0.10489	0.11417	0.1263	0.12372	0.1211	0.13205	0.090652	0.10564	0.11278	0.12424	0.14216	0.096988	0.10524	0.099994	0.15345	0.14711	0.15361	0.5834	0.15509	0.20069	0.15862	0.12632	0.1681	0.13423	0.14649	0.18636	0.18391	0.19938	0.18127	0.19087	0.2327	0.16055	0.3729	0.20011	0.19228	0.19828	0.19562
952	0.15686	0.10515	0.095712	0.13653	0.11461	0.10901	0.1144	0.1837	0.28492	0.11174	0.094054	0.63515	0.10717	0.11657	0.1289	0.1263	0.12351	0.13478	0.092754	0.10789	0.1152	0.12684	0.14515	0.099173	0.10752	0.10222	0.15713	0.1506	0.15741	0.71577	0.15884	0.20896	0.16203	0.12899	0.17193	0.13704	0.14961	0.19103	0.19003	0.20733	0.18708	0.19778	0.24628	0.16471	0.43004	0.20828	0.19938	0.20617	0.203
953	0.13248	0.10149	0.090855	0.1192	0.10673	0.10426	0.11498	0.15568	0.24156	0.1138	0.096153	0.59665	0.10948	0.119	0.13156	0.12893	0.12597	0.13758	0.094894	0.11019	0.11766	0.1295	0.14824	0.10139	0.10983	0.10447	0.16099	0.15426	0.16142	0.84281	0.16279	0.21858	0.16557	0.13173	0.17593	0.13993	0.15283	0.19598	0.19686	0.21641	0.19352	0.20561	0.26283	0.16914	0.50519	0.21778	0.20744	0.21526	0.21142
954	0.11481	0.099446	0.088022	0.10708	0.10162	0.10138	0.11596	0.13401	0.20303	0.11593	0.098292	0.55406	0.11183	0.12148	0.13427	0.13163	0.12849	0.14046	0.097066	0.11252	0.12017	0.13222	0.15143	0.10363	0.11218	0.10675	0.16507	0.15811	0.16568	0.91783	0.16698	0.22997	0.16926	0.13455	0.18014	0.1429	0.15617	0.20126	0.20457	0.22693	0.20075	0.2146	0.28334	0.17389	0.59772	0.22904	0.21675	0.22591	0.22119
955	0.10259	0.098577	0.086635	0.098968	0.098559	0.099893	0.11727	0.11811	0.17063	0.11813	0.10047	0.50875	0.1142	0.124	0.13706	0.13439	0.13106	0.14342	0.099267	0.11488	0.12272	0.13501	0.15474	0.10591	0.11457	0.10905	0.1694	0.16217	0.17023	0.92641	0.17145	0.24367	0.17311	0.13743	0.18457	0.14597	0.15964	0.20693	0.21341	0.23933	0.20899	0.2251	0.30911	0.17901	0.69788	0.2426	0.22769	0.2386	0.23271
956	0.09448	0.098563	0.086277	0.093798	0.09698	0.099421	0.11883	0.10696	0.14497	0.12039	0.10267	0.46172	0.11661	0.12657	0.13991	0.13723	0.13369	0.14647	0.1015	0.11729	0.12532	0.13788	0.15817	0.10821	0.117	0.11139	0.17401	0.16649	0.17511	0.89341	0.17623	0.26039	0.17715	0.14041	0.18925	0.14914	0.16325	0.21304	0.22372	0.25417	0.21853	0.23759	0.34175	0.18459	0.78465	0.25919	0.24079	0.25401	0.24657
957	0.089356	0.099169	0.086651	0.090753	0.096471	0.09969	0.1206	0.099464	0.12579	0.12271	0.10491	0.4138	0.11906	0.12919	0.14285	0.14016	0.13639	0.14963	0.10375	0.11973	0.12799	0.14082	0.16174	0.11054	0.11947	0.11376	0.17897	0.17109	0.18039	0.84243	0.18141	0.28106	0.18139	0.14347	0.19424	0.15242	0.16703	0.2197	0.23597	0.27221	0.22977	0.25269	0.38304	0.1907	0.83617	0.27976	0.25677	0.27305	0.26353
958	0.086364	0.10023	0.087548	0.089223	0.096732	0.1005	0.12253	0.094681	0.11215	0.1251	0.10717	0.36579	0.12155	0.13187	0.14587	0.14317	0.13917	0.15291	0.10603	0.12222	0.13071	0.14386	0.16546	0.11291	0.12198	0.11617	0.18433	0.17604	0.18615	0.78362	0.18706	0.30685	0.18587	0.14665	0.19956	0.15584	0.17098	0.22699	0.25077	0.29448	0.24326	0.27125	0.43461	0.19748	0.84632	0.30553	0.27666	0.29697	0.28471
959	0.084882	0.10161	0.088816	0.088771	0.097544	0.1017	0.1246	0.09187	0.10286	0.12754	0.10947	0.3186	0.12408	0.13461	0.14898	0.14629	0.14202	0.15631	0.10835	0.12476	0.13351	0.147	0.16936	0.11532	0.12455	0.11862	0.19016	0.18139	0.19248	0.72161	0.19327	0.3393	0.19062	0.14994	0.20528	0.1594	0.17515	0.23507	0.26902	0.32226	0.25978	0.29441	0.49718	0.20506	0.82517	0.33813	0.30192	0.32747	0.31159
960	0.08447	0.10324	0.09035	0.089084	0.098754	0.10319	0.12678	0.090482	0.096829	0.13004	0.11181	0.27335	0.12667	0.13742	0.1522	0.14952	0.14495	0.15986	0.11069	0.12735	0.13638	0.15024	0.17346	0.11776	0.12717	0.1211	0.19658	0.18723	0.19951	0.65863	0.20019	0.38034	0.19568	0.15336	0.21147	0.16312	0.17955	0.24409	0.29193	0.35718	0.28041	0.32368	0.56928	0.21366	0.78597	0.37964	0.33463	0.36684	0.34623
961	0.084814	0.10504	0.092076	0.089939	0.10025	0.10489	0.12906	0.090112	0.093158	0.13261	0.11418	0.23144	0.1293	0.1403	0.15554	0.15287	0.14798	0.16356	0.11307	0.13	0.13933	0.15361	0.17779	0.12024	0.12984	0.12364	0.2037	0.19366	0.20741	0.59575	0.20799	0.43231	0.2011	0.15693	0.21822	0.16702	0.18423	0.2543	0.32119	0.40114	0.30668	0.36102	0.64556	0.22353	0.73739	0.43254	0.37774	0.41797	0.39127
962	0.085694	0.10699	0.093941	0.091181	0.10196	0.10676	0.13144	0.090472	0.09118	0.13525	0.11658	0.19436	0.132	0.14326	0.15901	0.15637	0.15111	0.16745	0.11548	0.13271	0.14237	0.15711	0.18239	0.12277	0.13259	0.12622	0.21168	0.20081	0.21639	0.53351	0.21693	0.49731	0.20695	0.16067	0.22565	0.17113	0.18922	0.26599	0.35916	0.45604	0.34077	0.40879	0.71573	0.23502	0.68419	0.49914	0.43514	0.4839	0.44972
963	0.086952	0.10903	0.095908	0.092699	0.10382	0.10875	0.13389	0.091354	0.090407	0.13795	0.11903	0.16337	0.13476	0.14632	0.16262	0.16001	0.15434	0.17155	0.11794	0.13549	0.14552	0.16078	0.18728	0.12536	0.13541	0.12886	0.22073	0.20887	0.22671	0.47223	0.22735	0.57572	0.21332	0.16461	0.2339	0.17549	0.1946	0.27956	0.40883	0.52289	0.38562	0.46932	0.76738	0.24859	0.6291	0.57985	0.51096	0.56618	0.52384
964	0.08848	0.11117	0.097954	0.094415	0.1058	0.11083	0.13642	0.09261	0.09049	0.14073	0.12152	0.13901	0.13759	0.14947	0.1664	0.16384	0.1577	0.17588	0.12043	0.13834	0.14877	0.16461	0.19253	0.12799	0.1383	0.13156	0.23108	0.21805	0.23871	0.41223	0.23974	0.66307	0.22029	0.16877	0.24318	0.18013	0.20043	0.29553	0.47352	0.60001	0.44482	0.54365	0.79211	0.26482	0.57371	0.66972	0.6068	0.66111	0.6125
965	0.090201	0.11337	0.10006	0.096274	0.10787	0.113	0.13903	0.094137	0.091182	0.14359	0.12406	0.12094	0.14049	0.15274	0.17037	0.16788	0.1612	0.1805	0.12298	0.14127	0.15215	0.16865	0.1982	0.13069	0.14129	0.13432	0.24306	0.22864	0.25283	0.35402	0.25482	0.74675	0.22802	0.1732	0.25372	0.1851	0.20681	0.31457	0.55519	0.6803	0.52159	0.62887	0.79029	0.28444	0.51893	0.75489	0.71482	0.75475	0.70639
966	0.09206	0.11563	0.10221	0.09824	0.11002	0.11524	0.14171	0.095858	0.092307	0.14653	0.12665	0.10819	0.14348	0.15613	0.17455	0.17215	0.16485	0.18544	0.12557	0.1443	0.15568	0.17291	0.20435	0.13345	0.14437	0.13716	0.25704	0.24102	0.26959	0.29842	0.27359	0.80882	0.23667	0.17793	0.26587	0.19046	0.21385	0.3375	0.65072	0.75079	0.61562	0.71515	0.7682	0.3084	0.46537	0.81632	0.81244	0.82533	0.78697
967	0.094019	0.11795	0.10441	0.10029	0.11222	0.11753	0.14447	0.097723	0.09374	0.14956	0.12929	0.099577	0.14656	0.15966	0.17898	0.17669	0.16868	0.19077	0.12822	0.14742	0.15936	0.17743	0.21107	0.13629	0.14756	0.14007	0.2735	0.2557	0.28967	0.24677	0.29745	0.8363	0.24644	0.18304	0.28003	0.1963	0.22172	0.36521	0.74675	0.79717	0.7173	0.78578	0.7331	0.33785	0.41337	0.84127	0.8714	0.85642	0.83467
968	0.096053	0.12032	0.10665	0.10239	0.11448	0.11988	0.14731	0.099696	0.095394	0.15269	0.132	0.094032	0.14975	0.16334	0.18368	0.18155	0.1727	0.19656	0.13094	0.15066	0.16321	0.18225	0.21848	0.13921	0.15088	0.14308	0.29307	0.27336	0.31395	0.20081	0.3284	0.8302	0.25759	0.18859	0.29668	0.20269	0.23059	0.39849	0.82055	0.81273	0.80442	0.82554	0.69016	0.3742	0.36322	0.83218	0.88167	0.84948	0.84346
969	0.098145	0.12274	0.10891	0.10455	0.11678	0.12228	0.15022	0.10175	0.097208	0.15592	0.13477	0.090708	0.15306	0.1672	0.18872	0.1868	0.17695	0.20289	0.13372	0.15403	0.16728	0.18743	0.22672	0.14221	0.15434	0.14618	0.31653	0.29496	0.34355	0.1623	0.36915	0.80057	0.27039	0.19468	0.31638	0.20976	0.24072	0.43767	0.85424	0.80082	0.85373	0.83035	0.64268	0.41904	0.3153	0.80015	0.85545	0.81727	0.82174
970	0.10028	0.1252	0.11122	0.10675	0.11913	0.12474	0.15323	0.10387	0.099139	0.15928	0.13762	0.088975	0.15649	0.17126	0.19414	0.19248	0.18145	0.20987	0.13657	0.15753	0.17157	0.19302	0.23597	0.14532	0.15795	0.14939	0.34494	0.32179	0.37985	0.13218	0.4231	0.75756	0.28514	0.20143	0.33967	0.21764	0.25236	0.48212	0.84822	0.77019	0.8589	0.8081	0.59256	0.47377	0.27021	0.75541	0.81078	0.77173	0.78228
971	0.10246	0.12772	0.11356	0.10899	0.12152	0.12724	0.15632	0.10604	0.10116	0.16277	0.14055	0.088375	0.16007	0.17556	0.20002	0.19869	0.18625	0.2176	0.13951	0.1612	0.17613	0.19912	0.24649	0.14854	0.16175	0.15273	0.37957	0.35565	0.42446	0.11012	0.49366	0.70729	0.30214	0.20897	0.36706	0.22648	0.26585	0.52985	0.81574	0.72829	0.83179	0.76917	0.54098	0.5388	0.22887	0.70385	0.75754	0.7193	0.73346
972	0.10467	0.13029	0.11593	0.11127	0.12396	0.1298	0.15951	0.10826	0.10325	0.1664	0.14357	0.088578	0.16381	0.18012	0.20646	0.20551	0.19139	0.22623	0.14254	0.16505	0.18101	0.20581	0.25859	0.15188	0.16574	0.1562	0.42187	0.39888	0.47882	0.094749	0.58188	0.65321	0.32169	0.2175	0.39888	0.23646	0.28158	0.57736	0.76937	0.67986	0.78749	0.72092	0.48868	0.61178	0.19239	0.6487	0.7	0.66337	0.67969
973	0.10691	0.13292	0.11834	0.11358	0.12644	0.13242	0.16281	0.11051	0.10539	0.1702	0.14668	0.089354	0.16774	0.185	0.21358	0.21307	0.19692	0.23591	0.14567	0.1691	0.18625	0.21325	0.27271	0.15536	0.16997	0.15983	0.47309	0.4542	0.54333	0.084422	0.68108	0.59732	0.34405	0.22723	0.43516	0.24779	0.29999	0.61999	0.71576	0.62771	0.73453	0.66744	0.43623	0.68543	0.16174	0.59189	0.64057	0.60591	0.62347
974	0.10918	0.13561	0.12079	0.11593	0.12897	0.13509	0.16622	0.11281	0.10757	0.17417	0.14991	0.090536	0.17189	0.19025	0.22153	0.2215	0.20291	0.24683	0.14891	0.17338	0.19194	0.2216	0.28937	0.15899	0.17446	0.16363	0.53352	0.52387	0.61566	0.077718	0.77323	0.54085	0.36945	0.23847	0.47541	0.26075	0.3216	0.65304	0.65841	0.57365	0.67712	0.61123	0.38419	0.74784	0.13732	0.53457	0.58068	0.54807	0.56631
975	0.11148	0.13835	0.12328	0.11831	0.13155	0.13783	0.16976	0.11514	0.1098	0.17835	0.15325	0.092007	0.17629	0.19596	0.23054	0.23099	0.20942	0.25925	0.15228	0.17794	0.19816	0.23109	0.30922	0.1628	0.17925	0.16763	0.60093	0.60729	0.68869	0.073585	0.83464	0.48448	0.39798	0.2516	0.51835	0.27565	0.34697	0.67311	0.59931	0.51876	0.61757	0.55372	0.33327	0.78693	0.11881	0.47741	0.52105	0.4905	0.50905
976	0.11381	0.14117	0.12582	0.12073	0.13418	0.14063	0.17343	0.11752	0.11206	0.18276	0.15673	0.093685	0.18098	0.2022	0.24084	0.24175	0.21657	0.27343	0.15578	0.1828	0.20502	0.24201	0.33297	0.16681	0.1844	0.17186	0.66892	0.69689	0.75055	0.071272	0.8536	0.42874	0.42952	0.26713	0.56162	0.29289	0.37665	0.67903	0.53962	0.46377	0.55722	0.49581	0.28445	0.79772	0.10531	0.42095	0.46212	0.43363	0.45223
977	0.11617	0.14406	0.12841	0.12319	0.13687	0.1435	0.17725	0.11993	0.11436	0.18743	0.16037	0.095512	0.18602	0.20911	0.25275	0.25408	0.22446	0.28974	0.15944	0.18803	0.21266	0.25468	0.36129	0.17104	0.18996	0.17636	0.72691	0.77591	0.7892	0.070255	0.83719	0.3741	0.46358	0.28572	0.60185	0.31291	0.41108	0.67182	0.48005	0.40929	0.49688	0.43817	0.23906	0.78392	0.095757	0.36573	0.40429	0.37794	0.39633
978	0.11857	0.14703	0.13105	0.12569	0.13962	0.14646	0.18124	0.12238	0.11669	0.1924	0.16417	0.09745	0.19148	0.21682	0.26665	0.26834	0.23324	0.30855	0.16328	0.19369	0.22126	0.26953	0.3946	0.17555	0.19601	0.18116	0.76403	0.82489	0.79971	0.070165	0.79985	0.32125	0.49922	0.30823	0.63517	0.33623	0.45034	0.65384	0.42116	0.35593	0.43711	0.38143	0.19862	0.7532	0.089177	0.3125	0.3481	0.32407	0.34197
979	0.12101	0.15008	0.13375	0.12824	0.14244	0.1495	0.18541	0.12487	0.11906	0.19772	0.16817	0.099469	0.19744	0.22551	0.28296	0.28497	0.24311	0.33034	0.16732	0.19984	0.23103	0.28699	0.43282	0.18036	0.20263	0.18632	0.77543	0.83644	0.78583	0.070737	0.75107	0.27117	0.53488	0.33573	0.65822	0.36339	0.49388	0.62763	0.36359	0.30455	0.37855	0.32643	0.16452	0.71188	0.084794	0.26239	0.2944	0.27302	0.29003
980	0.12348	0.15323	0.13652	0.13083	0.14532	0.15263	0.18979	0.12741	0.12147	0.20344	0.1724	0.10155	0.20399	0.23539	0.30216	0.30455	0.25427	0.35557	0.17159	0.20661	0.24224	0.30761	0.4752	0.18552	0.20994	0.19191	0.76374	0.81779	0.75479	0.071783	0.6962	0.22527	0.56847	0.36953	0.66912	0.39489	0.5401	0.59552	0.30827	0.2563	0.32203	0.27431	0.13748	0.66425	0.082027	0.21689	0.24447	0.2262	0.24181
981	0.126	0.15648	0.13935	0.13348	0.14829	0.15586	0.1944	0.13	0.12391	0.20963	0.17688	0.10368	0.21127	0.24674	0.32482	0.32774	0.26704	0.3847	0.17614	0.2141	0.25522	0.33198	0.52012	0.19112	0.21807	0.198	0.73525	0.78034	0.71295	0.073166	0.63825	0.18513	0.5976	0.41102	0.66787	0.43104	0.58612	0.55935	0.25652	0.21268	0.26879	0.22666	0.11724	0.61301	0.080455	0.17762	0.19999	0.18526	0.19892
982	0.12857	0.15985	0.14226	0.13619	0.15134	0.1592	0.19927	0.13265	0.12639	0.21638	0.18166	0.10586	0.21945	0.2599	0.35159	0.35535	0.28174	0.41805	0.18099	0.22247	0.27043	0.36077	0.56501	0.19722	0.22721	0.20471	0.69591	0.73247	0.66475	0.074789	0.5789	0.15208	0.62001	0.46141	0.65585	0.47175	0.6279	0.52056	0.21004	0.17521	0.22049	0.1852	0.10278	0.55985	0.079776	0.14579	0.16262	0.1516	0.16289
983	0.13118	0.16334	0.14525	0.13896	0.15448	0.16267	0.20444	0.13535	0.12892	0.2238	0.18679	0.10807	0.22873	0.27535	0.38315	0.3882	0.29882	0.45565	0.18622	0.23193	0.28844	0.39466	0.60651	0.20393	0.23756	0.21216	0.65	0.67907	0.61295	0.076582	0.51911	0.12655	0.63408	0.52087	0.63512	0.51616	0.66105	0.48025	0.17058	0.14494	0.17894	0.1513	0.092854	0.50582	0.07977	0.12159	0.13324	0.12566	0.1345
984	0.13385	0.16697	0.14833	0.1418	0.15772	0.16627	0.20995	0.13811	0.1315	0.23201	0.19234	0.11031	0.23941	0.29366	0.4201	0.42702	0.31878	0.49697	0.19188	0.24273	0.30999	0.43419	0.64092	0.21138	0.2494	0.22052	0.60037	0.62295	0.55931	0.078496	0.45954	0.10797	0.63914	0.58738	0.60783	0.56235	0.68203	0.4393	0.13928	0.12197	0.1455	0.12541	0.086288	0.45168	0.080278	0.10422	0.11162	0.10684	0.11349
985	0.13658	0.17075	0.15151	0.14471	0.16107	0.17002	0.21586	0.14094	0.13412	0.24117	0.19838	0.11258	0.25188	0.31559	0.46266	0.47206	0.34218	0.54054	0.19807	0.25519	0.33603	0.47941	0.66516	0.21974	0.26307	0.23002	0.54873	0.5656	0.50487	0.080496	0.4008	0.095011	0.63555	0.65474	0.57587	0.60698	0.68944	0.39845	0.11598	0.10542	0.12031	0.10671	0.082177	0.39805	0.081184	0.092249	0.096452	0.093766	0.098667
986	0.13937	0.17471	0.15479	0.1477	0.16454	0.17394	0.22222	0.14384	0.1368	0.25149	0.20501	0.11489	0.26668	0.34206	0.51027	0.52261	0.36958	0.58383	0.20489	0.26972	0.36769	0.52946	0.67746	0.22923	0.27898	0.24093	0.49631	0.50803	0.45042	0.082557	0.34365	0.086321	0.62427	0.71353	0.54074	0.64588	0.6837	0.3584	0.099617	0.094011	0.10244	0.093855	0.079829	0.34561	0.082396	0.084309	0.08624	0.085022	0.08862
987	0.14223	0.17886	0.1582	0.15078	0.16815	0.17805	0.22911	0.14682	0.13953	0.26319	0.21236	0.11723	0.2845	0.37409	0.56107	0.57627	0.40142	0.62328	0.21249	0.28681	0.40616	0.58199	0.67772	0.24013	0.29762	0.25365	0.44391	0.4509	0.39658	0.084664	0.28917	0.08072	0.60663	0.75363	0.50361	0.67477	0.66676	0.31985	0.088588	0.086437	0.090332	0.085334	0.078752	0.29528	0.083843	0.07926	0.079604	0.079399	0.082054
988	0.14517	0.18324	0.16175	0.15396	0.17191	0.18238	0.23661	0.14988	0.14233	0.27653	0.22058	0.1196	0.30627	0.41269	0.61145	0.62859	0.43784	0.65481	0.22105	0.30704	0.4525	0.63282	0.66722	0.25279	0.31956	0.26866	0.3922	0.39473	0.34404	0.086805	0.23887	0.077313	0.58399	0.76871	0.46535	0.6905	0.64109	0.28349	0.081381	0.081611	0.08237	0.079887	0.07859	0.24824	0.085471	0.076262	0.075483	0.075986	0.077958
989	0.14819	0.18786	0.16545	0.15724	0.17584	0.18694	0.24483	0.15305	0.14519	0.29183	0.22988	0.12201	0.33322	0.45853	0.656	0.67313	0.47833	0.6749	0.23081	0.3311	0.50702	0.67612	0.64808	0.26769	0.34541	0.2866	0.34184	0.34017	0.29367	0.088974	0.19459	0.075488	0.55754	0.75984	0.4266	0.69215	0.60899	0.25002	0.076878	0.078765	0.077335	0.07663	0.079091	0.20601	0.08724	0.074738	0.073162	0.074163	0.075638
990	0.1513	0.19277	0.16931	0.16064	0.17995	0.19178	0.25389	0.15631	0.14813	0.30939	0.24051	0.12446	0.36687	0.51131	0.68891	0.70359	0.5214	0.68186	0.24208	0.3597	0.56815	0.70619	0.62233	0.28542	0.37582	0.30831	0.29368	0.28818	0.24671	0.091168	0.15797	0.074806	0.5282	0.73329	0.38789	0.68109	0.57223	0.22009	0.074316	0.077356	0.074398	0.07495	0.080074	0.17006	0.089119	0.074279	0.07214	0.073489	0.074603
991	0.15452	0.198	0.17337	0.16416	0.18428	0.19693	0.26391	0.15969	0.15115	0.32955	0.25279	0.12694	0.40893	0.56893	0.70634	0.71655	0.56436	0.67609	0.25528	0.39348	0.63132	0.7198	0.59164	0.30675	0.41128	0.33484	0.24883	0.24005	0.20465	0.093383	0.12969	0.074941	0.49672	0.69501	0.3497	0.65964	0.53217	0.19419	0.07313	0.076973	0.072949	0.074389	0.081399	0.1413	0.091083	0.074578	0.072042	0.073633	0.074484
992	0.15784	0.2036	0.17764	0.16784	0.18885	0.20243	0.27506	0.16319	0.15425	0.35258	0.26714	0.12947	0.46092	0.62675	0.70752	0.71232	0.60355	0.65937	0.27096	0.43287	0.68865	0.71705	0.55735	0.33265	0.45205	0.36744	0.20859	0.1974	0.16894	0.09562	0.10918	0.075659	0.46369	0.64935	0.31256	0.63029	0.48991	0.17255	0.072921	0.077324	0.072553	0.074623	0.082971	0.11964	0.093118	0.075418	0.072602	0.074363	0.075021
993	0.16128	0.20963	0.18216	0.17167	0.19368	0.20835	0.28749	0.16683	0.15745	0.37869	0.28409	0.13204	0.52333	0.67778	0.6944	0.69383	0.63502	0.63405	0.28985	0.47774	0.73105	0.70045	0.52055	0.36427	0.49782	0.4075	0.17424	0.16172	0.14046	0.097879	0.094976	0.076798	0.42962	0.5992	0.2771	0.59523	0.44629	0.15509	0.073409	0.078203	0.072909	0.075425	0.084721	0.10414	0.09521	0.076646	0.073635	0.075513	0.076029
[truncated: 207 more rows]
[truncated: 92 more columns]
