# Supplementary material for: Causality Analysis and Cell Network Modeling of Spatial Calcium Signaling Patterns in Liver Lobules
Source: Front Physiol. 2018 Oct 4;9:1377. doi: 10.3389/fphys.2018.01377 (PMC6180170; doi:10.3389/fphys.2018.01377)
Supplement: Supplementary file 1 [file Data_Sheet_1.ZIP › Vadigepalli-Supplementary-Data-Code/Fig8B_data.txt]

Time (sec)	Cell 1	Cell 2	Cell 3	Cell 4	Cell 5	Cell 6	Cell 7	Cell 8	Cell 9	Cell 10	Cell 11	Cell 12	Cell 13	Cell 14	Cell 15	Cell 16	Cell 17	Cell 18	Cell 19	Cell 20	Cell 21	Cell 22	Cell 23	Cell 24	Cell 25	Cell 26	Cell 27	Cell 28	Cell 29	Cell 30	Cell 31	Cell 32	Cell 33	Cell 34	Cell 35	Cell 36	Cell 37	Cell 38	Cell 39	Cell 40	Cell 41	Cell 42	Cell 43	Cell 44	Cell 45	Cell 46	Cell 47	Cell 48	Cell 49
1	0.2	0.2	0.2	0.2	0.2	0.2	0.2	0.2	0.2	0.2	0.2	0.2	0.2	0.2	0.2	0.2	0.2	0.2	0.2	0.2	0.2	0.2	0.2	0.2	0.2	0.2	0.2	0.2	0.2	0.2	0.2	0.2	0.2	0.2	0.2	0.2	0.2	0.2	0.2	0.2	0.2	0.2	0.2	0.2	0.2	0.2	0.2	0.2	0.2
2	0.20519	0.20519	0.20519	0.20519	0.20519	0.20519	0.20519	0.20519	0.20519	0.20519	0.20519	0.20519	0.20519	0.20519	0.20519	0.20519	0.20519	0.20519	0.20519	0.20519	0.20519	0.20519	0.20519	0.20519	0.20519	0.20519	0.20519	0.20519	0.20519	0.20519	0.20519	0.20519	0.20519	0.20519	0.20519	0.20519	0.20519	0.20519	0.20519	0.20519	0.20519	0.20519	0.20519	0.20519	0.20519	0.20519	0.20519	0.20519	0.20519
3	0.20874	0.20874	0.20874	0.20874	0.20874	0.20874	0.20874	0.20874	0.20874	0.20874	0.20874	0.20874	0.20874	0.20874	0.20874	0.20874	0.20874	0.20874	0.20874	0.20874	0.20874	0.20874	0.20874	0.20874	0.20874	0.20874	0.20874	0.20874	0.20874	0.20874	0.20874	0.20874	0.20874	0.20874	0.20874	0.20874	0.20874	0.20874	0.20874	0.20874	0.20874	0.20874	0.20874	0.20874	0.20874	0.20874	0.20874	0.20874	0.20874
4	0.21224	0.21224	0.21224	0.21224	0.21224	0.21224	0.21224	0.21224	0.21224	0.21224	0.21224	0.21224	0.21224	0.21224	0.21224	0.21224	0.21224	0.21224	0.21224	0.21224	0.21224	0.21224	0.21224	0.21224	0.21224	0.21224	0.21224	0.21224	0.21224	0.21224	0.21224	0.21224	0.21224	0.21224	0.21224	0.21224	0.21224	0.21224	0.21224	0.21224	0.21224	0.21224	0.21224	0.21224	0.21224	0.21224	0.21224	0.21224	0.21224
5	0.21577	0.21577	0.21577	0.21577	0.21577	0.21577	0.21577	0.21577	0.21577	0.21577	0.21577	0.21577	0.21577	0.21577	0.21577	0.21577	0.21577	0.21577	0.21577	0.21577	0.21577	0.21577	0.21577	0.21577	0.21577	0.21577	0.21577	0.21577	0.21577	0.21577	0.21577	0.21577	0.21577	0.21577	0.21577	0.21577	0.21577	0.21577	0.21577	0.21577	0.21577	0.21577	0.21577	0.21577	0.21577	0.21577	0.21577	0.21577	0.21577
6	0.21932	0.21932	0.21932	0.21932	0.21932	0.21932	0.21932	0.21932	0.21932	0.21932	0.21932	0.21932	0.21932	0.21932	0.21932	0.21932	0.21932	0.21932	0.21932	0.21932	0.21932	0.21932	0.21932	0.21932	0.21932	0.21932	0.21932	0.21932	0.21932	0.21932	0.21932	0.21932	0.21932	0.21932	0.21932	0.21932	0.21932	0.21932	0.21932	0.21932	0.21932	0.21932	0.21932	0.21932	0.21932	0.21932	0.21932	0.21932	0.21932
7	0.2229	0.2229	0.2229	0.2229	0.2229	0.2229	0.2229	0.2229	0.2229	0.2229	0.2229	0.2229	0.2229	0.2229	0.2229	0.2229	0.2229	0.2229	0.2229	0.2229	0.2229	0.2229	0.2229	0.2229	0.2229	0.2229	0.2229	0.2229	0.2229	0.2229	0.2229	0.2229	0.2229	0.2229	0.2229	0.2229	0.2229	0.2229	0.2229	0.2229	0.2229	0.2229	0.2229	0.2229	0.2229	0.2229	0.2229	0.2229	0.2229
8	0.22652	0.22652	0.22652	0.22652	0.22652	0.22652	0.22652	0.22652	0.22652	0.22652	0.22652	0.22652	0.22652	0.22652	0.22652	0.22652	0.22652	0.22652	0.22652	0.22652	0.22652	0.22652	0.22652	0.22652	0.22652	0.22652	0.22652	0.22652	0.22652	0.22652	0.22652	0.22652	0.22652	0.22652	0.22652	0.22652	0.22652	0.22652	0.22652	0.22652	0.22652	0.22652	0.22652	0.22652	0.22652	0.22652	0.22652	0.22652	0.22652
9	0.23017	0.23017	0.23017	0.23017	0.23017	0.23017	0.23017	0.23017	0.23017	0.23017	0.23017	0.23017	0.23017	0.23017	0.23017	0.23017	0.23017	0.23017	0.23017	0.23017	0.23017	0.23017	0.23017	0.23017	0.23017	0.23017	0.23017	0.23017	0.23017	0.23017	0.23017	0.23017	0.23017	0.23017	0.23017	0.23017	0.23017	0.23017	0.23017	0.23017	0.23017	0.23017	0.23017	0.23017	0.23017	0.23017	0.23017	0.23017	0.23017
10	0.23385	0.23385	0.23385	0.23385	0.23385	0.23385	0.23385	0.23385	0.23385	0.23385	0.23385	0.23385	0.23385	0.23385	0.23385	0.23385	0.23385	0.23385	0.23385	0.23385	0.23385	0.23385	0.23385	0.23385	0.23385	0.23385	0.23385	0.23385	0.23385	0.23385	0.23385	0.23385	0.23385	0.23385	0.23385	0.23385	0.23385	0.23385	0.23385	0.23385	0.23385	0.23385	0.23385	0.23385	0.23385	0.23385	0.23385	0.23385	0.23385
11	0.23756	0.23756	0.23756	0.23756	0.23756	0.23756	0.23756	0.23756	0.23756	0.23756	0.23756	0.23756	0.23756	0.23756	0.23756	0.23756	0.23756	0.23756	0.23756	0.23756	0.23756	0.23756	0.23756	0.23756	0.23756	0.23756	0.23756	0.23756	0.23756	0.23756	0.23756	0.23756	0.23756	0.23756	0.23756	0.23756	0.23756	0.23756	0.23756	0.23756	0.23756	0.23756	0.23756	0.23756	0.23756	0.23756	0.23756	0.23756	0.23756
12	0.2413	0.2413	0.2413	0.2413	0.2413	0.2413	0.2413	0.2413	0.2413	0.2413	0.2413	0.2413	0.2413	0.2413	0.2413	0.2413	0.2413	0.2413	0.2413	0.2413	0.2413	0.2413	0.2413	0.2413	0.2413	0.2413	0.2413	0.2413	0.2413	0.2413	0.2413	0.2413	0.2413	0.2413	0.2413	0.2413	0.2413	0.2413	0.2413	0.2413	0.2413	0.2413	0.2413	0.2413	0.2413	0.2413	0.2413	0.2413	0.2413
13	0.24506	0.24506	0.24506	0.24506	0.24506	0.24506	0.24506	0.24506	0.24506	0.24506	0.24506	0.24506	0.24506	0.24506	0.24506	0.24506	0.24506	0.24506	0.24506	0.24506	0.24506	0.24506	0.24506	0.24506	0.24506	0.24506	0.24506	0.24506	0.24506	0.24506	0.24506	0.24506	0.24506	0.24506	0.24506	0.24506	0.24506	0.24506	0.24506	0.24506	0.24506	0.24506	0.24506	0.24506	0.24506	0.24506	0.24506	0.24506	0.24506
14	0.24884	0.24884	0.24884	0.24884	0.24884	0.24884	0.24884	0.24884	0.24884	0.24884	0.24884	0.24884	0.24884	0.24884	0.24884	0.24884	0.24884	0.24884	0.24884	0.24884	0.24884	0.24884	0.24884	0.24884	0.24884	0.24884	0.24884	0.24884	0.24884	0.24884	0.24884	0.24884	0.24884	0.24884	0.24884	0.24884	0.24884	0.24884	0.24884	0.24884	0.24884	0.24884	0.24884	0.24884	0.24884	0.24884	0.24884	0.24884	0.24884
15	0.25264	0.25264	0.25264	0.25264	0.25264	0.25264	0.25264	0.25264	0.25264	0.25264	0.25264	0.25264	0.25264	0.25264	0.25264	0.25264	0.25264	0.25264	0.25264	0.25264	0.25264	0.25264	0.25264	0.25264	0.25264	0.25264	0.25264	0.25264	0.25264	0.25264	0.25264	0.25264	0.25264	0.25264	0.25264	0.25264	0.25264	0.25264	0.25264	0.25264	0.25264	0.25264	0.25264	0.25264	0.25264	0.25264	0.25264	0.25264	0.25264
16	0.25645	0.25645	0.25645	0.25645	0.25645	0.25645	0.25645	0.25645	0.25645	0.25645	0.25645	0.25645	0.25645	0.25645	0.25645	0.25645	0.25645	0.25645	0.25645	0.25645	0.25645	0.25645	0.25645	0.25645	0.25645	0.25645	0.25645	0.25645	0.25645	0.25645	0.25645	0.25645	0.25645	0.25645	0.25645	0.25645	0.25645	0.25645	0.25645	0.25645	0.25645	0.25645	0.25645	0.25645	0.25645	0.25645	0.25645	0.25645	0.25645
17	0.26027	0.26027	0.26027	0.26027	0.26027	0.26027	0.26027	0.26027	0.26027	0.26027	0.26027	0.26027	0.26027	0.26027	0.26027	0.26027	0.26027	0.26027	0.26027	0.26027	0.26027	0.26027	0.26027	0.26027	0.26027	0.26027	0.26027	0.26027	0.26027	0.26027	0.26027	0.26027	0.26027	0.26027	0.26027	0.26027	0.26027	0.26027	0.26027	0.26027	0.26027	0.26027	0.26027	0.26027	0.26027	0.26027	0.26027	0.26027	0.26027
18	0.26408	0.26408	0.26408	0.26408	0.26408	0.26408	0.26408	0.26408	0.26408	0.26408	0.26408	0.26408	0.26408	0.26408	0.26408	0.26408	0.26408	0.26408	0.26408	0.26408	0.26408	0.26408	0.26408	0.26408	0.26408	0.26408	0.26408	0.26408	0.26408	0.26408	0.26408	0.26408	0.26408	0.26408	0.26408	0.26408	0.26408	0.26408	0.26408	0.26408	0.26408	0.26408	0.26408	0.26408	0.26408	0.26408	0.26408	0.26408	0.26408
19	0.26789	0.26789	0.26789	0.26789	0.26789	0.26789	0.26789	0.26789	0.26789	0.26789	0.26789	0.26789	0.26789	0.26789	0.26789	0.26789	0.26789	0.26789	0.26789	0.26789	0.26789	0.26789	0.26789	0.26789	0.26789	0.26789	0.26789	0.26789	0.26789	0.26789	0.26789	0.26789	0.26789	0.26789	0.26789	0.26789	0.26789	0.26789	0.26789	0.26789	0.26789	0.26789	0.26789	0.26789	0.26789	0.26789	0.26789	0.26789	0.26789
20	0.27169	0.27169	0.27169	0.27169	0.27169	0.27169	0.27169	0.27169	0.27169	0.27169	0.27169	0.27169	0.27169	0.27169	0.27169	0.27169	0.27169	0.27169	0.27169	0.27169	0.27169	0.27169	0.27169	0.27169	0.27169	0.27169	0.27169	0.27169	0.27169	0.27169	0.27169	0.27169	0.27169	0.27169	0.27169	0.27169	0.27169	0.27169	0.27169	0.27169	0.27169	0.27169	0.27169	0.27169	0.27169	0.27169	0.27169	0.27169	0.27169
21	0.27546	0.27546	0.27546	0.27546	0.27546	0.27546	0.27546	0.27546	0.27546	0.27546	0.27546	0.27546	0.27546	0.27546	0.27546	0.27546	0.27546	0.27546	0.27546	0.27546	0.27546	0.27546	0.27546	0.27546	0.27546	0.27546	0.27546	0.27546	0.27546	0.27546	0.27546	0.27546	0.27546	0.27546	0.27546	0.27546	0.27546	0.27546	0.27546	0.27546	0.27546	0.27546	0.27546	0.27546	0.27546	0.27546	0.27546	0.27546	0.27546
22	0.2792	0.2792	0.2792	0.2792	0.2792	0.2792	0.2792	0.2792	0.2792	0.2792	0.2792	0.2792	0.2792	0.2792	0.2792	0.2792	0.2792	0.2792	0.2792	0.2792	0.2792	0.2792	0.2792	0.2792	0.2792	0.2792	0.2792	0.2792	0.2792	0.2792	0.2792	0.2792	0.2792	0.2792	0.2792	0.2792	0.2792	0.2792	0.2792	0.2792	0.2792	0.2792	0.2792	0.2792	0.2792	0.2792	0.2792	0.2792	0.2792
23	0.2829	0.2829	0.2829	0.2829	0.2829	0.2829	0.2829	0.2829	0.2829	0.2829	0.2829	0.2829	0.2829	0.2829	0.2829	0.2829	0.2829	0.2829	0.2829	0.2829	0.2829	0.2829	0.2829	0.2829	0.2829	0.2829	0.2829	0.2829	0.2829	0.2829	0.2829	0.2829	0.2829	0.2829	0.2829	0.2829	0.2829	0.2829	0.2829	0.2829	0.2829	0.2829	0.2829	0.2829	0.2829	0.2829	0.2829	0.2829	0.2829
24	0.28656	0.28656	0.28656	0.28656	0.28656	0.28656	0.28656	0.28656	0.28656	0.28656	0.28656	0.28656	0.28656	0.28656	0.28656	0.28656	0.28656	0.28656	0.28656	0.28656	0.28656	0.28656	0.28656	0.28656	0.28656	0.28656	0.28656	0.28656	0.28656	0.28656	0.28656	0.28656	0.28656	0.28656	0.28656	0.28656	0.28656	0.28656	0.28656	0.28656	0.28656	0.28656	0.28656	0.28656	0.28656	0.28656	0.28656	0.28656	0.28656
25	0.29015	0.29015	0.29015	0.29015	0.29015	0.29015	0.29015	0.29015	0.29015	0.29015	0.29015	0.29015	0.29015	0.29015	0.29015	0.29015	0.29015	0.29015	0.29015	0.29015	0.29015	0.29015	0.29015	0.29015	0.29015	0.29015	0.29015	0.29015	0.29015	0.29015	0.29015	0.29015	0.29015	0.29015	0.29015	0.29015	0.29015	0.29015	0.29015	0.29015	0.29015	0.29015	0.29015	0.29015	0.29015	0.29015	0.29015	0.29015	0.29015
26	0.29367	0.29367	0.29367	0.29367	0.29367	0.29367	0.29367	0.29367	0.29367	0.29367	0.29367	0.29367	0.29367	0.29367	0.29367	0.29367	0.29367	0.29367	0.29367	0.29367	0.29367	0.29367	0.29367	0.29367	0.29367	0.29367	0.29367	0.29367	0.29367	0.29367	0.29367	0.29367	0.29367	0.29367	0.29367	0.29367	0.29367	0.29367	0.29367	0.29367	0.29367	0.29367	0.29367	0.29367	0.29367	0.29367	0.29367	0.29367	0.29367
27	0.29712	0.29712	0.29712	0.29712	0.29712	0.29712	0.29712	0.29712	0.29712	0.29712	0.29712	0.29712	0.29712	0.29712	0.29712	0.29712	0.29712	0.29712	0.29712	0.29712	0.29712	0.29712	0.29712	0.29712	0.29712	0.29712	0.29712	0.29712	0.29712	0.29712	0.29712	0.29712	0.29712	0.29712	0.29712	0.29712	0.29712	0.29712	0.29712	0.29712	0.29712	0.29712	0.29712	0.29712	0.29712	0.29712	0.29712	0.29712	0.29712
28	0.30047	0.30047	0.30047	0.30047	0.30047	0.30047	0.30047	0.30047	0.30047	0.30047	0.30047	0.30047	0.30047	0.30047	0.30047	0.30047	0.30047	0.30047	0.30047	0.30047	0.30047	0.30047	0.30047	0.30047	0.30047	0.30047	0.30047	0.30047	0.30047	0.30047	0.30047	0.30047	0.30047	0.30047	0.30047	0.30047	0.30047	0.30047	0.30047	0.30047	0.30047	0.30047	0.30047	0.30047	0.30047	0.30047	0.30047	0.30047	0.30047
29	0.30372	0.30372	0.30372	0.30372	0.30372	0.30372	0.30372	0.30372	0.30372	0.30372	0.30372	0.30372	0.30372	0.30372	0.30372	0.30372	0.30372	0.30372	0.30372	0.30372	0.30372	0.30372	0.30372	0.30372	0.30372	0.30372	0.30372	0.30372	0.30372	0.30372	0.30372	0.30372	0.30372	0.30372	0.30372	0.30372	0.30372	0.30372	0.30372	0.30372	0.30372	0.30372	0.30372	0.30372	0.30372	0.30372	0.30372	0.30372	0.30372
30	0.30686	0.30686	0.30686	0.30686	0.30686	0.30686	0.30686	0.30686	0.30686	0.30686	0.30686	0.30686	0.30686	0.30686	0.30686	0.30686	0.30686	0.30686	0.30686	0.30686	0.30686	0.30686	0.30686	0.30686	0.30686	0.30686	0.30686	0.30686	0.30686	0.30686	0.30686	0.30686	0.30686	0.30686	0.30686	0.30686	0.30686	0.30686	0.30686	0.30686	0.30686	0.30686	0.30686	0.30686	0.30686	0.30686	0.30686	0.30686	0.30686
31	0.30989	0.30989	0.30989	0.30989	0.30989	0.30989	0.30989	0.30989	0.30989	0.30989	0.30989	0.30989	0.30989	0.30989	0.30989	0.30989	0.30989	0.30989	0.30989	0.30989	0.30989	0.30989	0.30989	0.30989	0.30989	0.30989	0.30989	0.30989	0.30989	0.30989	0.30989	0.30989	0.30989	0.30989	0.30989	0.30989	0.30989	0.30989	0.30989	0.30989	0.30989	0.30989	0.30989	0.30989	0.30989	0.30989	0.30989	0.30989	0.30989
32	0.31278	0.31278	0.31278	0.31278	0.31278	0.31278	0.31278	0.31278	0.31278	0.31278	0.31278	0.31278	0.31278	0.31278	0.31278	0.31278	0.31278	0.31278	0.31278	0.31278	0.31278	0.31278	0.31278	0.31278	0.31278	0.31278	0.31278	0.31278	0.31278	0.31278	0.31278	0.31278	0.31278	0.31278	0.31278	0.31278	0.31278	0.31278	0.31278	0.31278	0.31278	0.31278	0.31278	0.31278	0.31278	0.31278	0.31278	0.31278	0.31278
33	0.31553	0.31553	0.31553	0.31553	0.31553	0.31553	0.31553	0.31553	0.31553	0.31553	0.31553	0.31553	0.31553	0.31553	0.31553	0.31553	0.31553	0.31553	0.31553	0.31553	0.31553	0.31553	0.31553	0.31553	0.31553	0.31553	0.31553	0.31553	0.31553	0.31553	0.31553	0.31553	0.31553	0.31553	0.31553	0.31553	0.31553	0.31553	0.31553	0.31553	0.31553	0.31553	0.31553	0.31553	0.31553	0.31553	0.31553	0.31553	0.31553
34	0.31813	0.31813	0.31813	0.31813	0.31813	0.31813	0.31813	0.31813	0.31813	0.31813	0.31813	0.31813	0.31813	0.31813	0.31813	0.31813	0.31813	0.31813	0.31813	0.31813	0.31813	0.31813	0.31813	0.31813	0.31813	0.31813	0.31813	0.31813	0.31813	0.31813	0.31813	0.31813	0.31813	0.31813	0.31813	0.31813	0.31813	0.31813	0.31813	0.31813	0.31813	0.31813	0.31813	0.31813	0.31813	0.31813	0.31813	0.31813	0.31813
35	0.32057	0.32057	0.32057	0.32057	0.32057	0.32057	0.32057	0.32057	0.32057	0.32057	0.32057	0.32057	0.32057	0.32057	0.32057	0.32057	0.32057	0.32057	0.32057	0.32057	0.32057	0.32057	0.32057	0.32057	0.32057	0.32057	0.32057	0.32057	0.32057	0.32057	0.32057	0.32057	0.32057	0.32057	0.32057	0.32057	0.32057	0.32057	0.32057	0.32057	0.32057	0.32057	0.32057	0.32057	0.32057	0.32057	0.32057	0.32057	0.32057
36	0.32286	0.32286	0.32286	0.32286	0.32286	0.32286	0.32286	0.32286	0.32286	0.32286	0.32286	0.32286	0.32286	0.32286	0.32286	0.32286	0.32286	0.32286	0.32286	0.32286	0.32286	0.32286	0.32286	0.32286	0.32286	0.32286	0.32286	0.32286	0.32286	0.32286	0.32286	0.32286	0.32286	0.32286	0.32286	0.32286	0.32286	0.32286	0.32286	0.32286	0.32286	0.32286	0.32286	0.32286	0.32286	0.32286	0.32286	0.32286	0.32286
37	0.32497	0.32497	0.32497	0.32497	0.32497	0.32497	0.32497	0.32497	0.32497	0.32497	0.32497	0.32497	0.32497	0.32497	0.32497	0.32497	0.32497	0.32497	0.32497	0.32497	0.32497	0.32497	0.32497	0.32497	0.32497	0.32497	0.32497	0.32497	0.32497	0.32497	0.32497	0.32497	0.32497	0.32497	0.32497	0.32497	0.32497	0.32497	0.32497	0.32497	0.32497	0.32497	0.32497	0.32497	0.32497	0.32497	0.32497	0.32497	0.32497
38	0.3269	0.3269	0.3269	0.3269	0.3269	0.3269	0.3269	0.3269	0.3269	0.3269	0.3269	0.3269	0.3269	0.3269	0.3269	0.3269	0.3269	0.3269	0.3269	0.3269	0.3269	0.3269	0.3269	0.3269	0.3269	0.3269	0.3269	0.3269	0.3269	0.3269	0.3269	0.3269	0.3269	0.3269	0.3269	0.3269	0.3269	0.3269	0.3269	0.3269	0.3269	0.3269	0.3269	0.3269	0.3269	0.3269	0.3269	0.3269	0.3269
39	0.32866	0.32866	0.32866	0.32866	0.32866	0.32866	0.32866	0.32866	0.32866	0.32866	0.32866	0.32866	0.32866	0.32866	0.32866	0.32866	0.32866	0.32866	0.32866	0.32866	0.32866	0.32866	0.32866	0.32866	0.32866	0.32866	0.32866	0.32866	0.32866	0.32866	0.32866	0.32866	0.32866	0.32866	0.32866	0.32866	0.32866	0.32866	0.32866	0.32866	0.32866	0.32866	0.32866	0.32866	0.32866	0.32866	0.32866	0.32866	0.32866
40	0.33024	0.33024	0.33024	0.33024	0.33024	0.33024	0.33024	0.33024	0.33024	0.33024	0.33024	0.33024	0.33024	0.33024	0.33024	0.33024	0.33024	0.33024	0.33024	0.33024	0.33024	0.33024	0.33024	0.33024	0.33024	0.33024	0.33024	0.33024	0.33024	0.33024	0.33024	0.33024	0.33024	0.33024	0.33024	0.33024	0.33024	0.33024	0.33024	0.33024	0.33024	0.33024	0.33024	0.33024	0.33024	0.33024	0.33024	0.33024	0.33024
41	0.33164	0.33164	0.33164	0.33164	0.33164	0.33164	0.33164	0.33164	0.33164	0.33164	0.33164	0.33164	0.33164	0.33164	0.33164	0.33164	0.33164	0.33164	0.33164	0.33164	0.33164	0.33164	0.33164	0.33164	0.33164	0.33164	0.33164	0.33164	0.33164	0.33164	0.33164	0.33164	0.33164	0.33164	0.33164	0.33164	0.33164	0.33164	0.33164	0.33164	0.33164	0.33164	0.33164	0.33164	0.33164	0.33164	0.33164	0.33164	0.33164
42	0.33286	0.33286	0.33286	0.33286	0.33286	0.33286	0.33286	0.33286	0.33286	0.33286	0.33286	0.33286	0.33286	0.33286	0.33286	0.33286	0.33286	0.33286	0.33286	0.33286	0.33286	0.33286	0.33286	0.33286	0.33286	0.33286	0.33286	0.33286	0.33286	0.33286	0.33286	0.33286	0.33286	0.33286	0.33286	0.33286	0.33286	0.33286	0.33286	0.33286	0.33286	0.33286	0.33286	0.33286	0.33286	0.33286	0.33286	0.33286	0.33286
43	0.3339	0.3339	0.3339	0.3339	0.3339	0.3339	0.3339	0.3339	0.3339	0.3339	0.3339	0.3339	0.3339	0.3339	0.3339	0.3339	0.3339	0.3339	0.3339	0.3339	0.3339	0.3339	0.3339	0.3339	0.3339	0.3339	0.3339	0.3339	0.3339	0.3339	0.3339	0.3339	0.3339	0.3339	0.3339	0.3339	0.3339	0.3339	0.3339	0.3339	0.3339	0.3339	0.3339	0.3339	0.3339	0.3339	0.3339	0.3339	0.3339
44	0.33476	0.33476	0.33476	0.33476	0.33476	0.33476	0.33476	0.33476	0.33476	0.33476	0.33476	0.33476	0.33476	0.33476	0.33476	0.33476	0.33476	0.33476	0.33476	0.33476	0.33476	0.33476	0.33476	0.33476	0.33476	0.33476	0.33476	0.33476	0.33476	0.33476	0.33476	0.33476	0.33476	0.33476	0.33476	0.33476	0.33476	0.33476	0.33476	0.33476	0.33476	0.33476	0.33476	0.33476	0.33476	0.33476	0.33476	0.33476	0.33476
45	0.33545	0.33545	0.33545	0.33545	0.33545	0.33545	0.33545	0.33545	0.33545	0.33545	0.33545	0.33545	0.33545	0.33545	0.33545	0.33545	0.33545	0.33545	0.33545	0.33545	0.33545	0.33545	0.33545	0.33545	0.33545	0.33545	0.33545	0.33545	0.33545	0.33545	0.33545	0.33545	0.33545	0.33545	0.33545	0.33545	0.33545	0.33545	0.33545	0.33545	0.33545	0.33545	0.33545	0.33545	0.33545	0.33545	0.33545	0.33545	0.33545
46	0.33597	0.33597	0.33597	0.33597	0.33597	0.33597	0.33597	0.33597	0.33597	0.33597	0.33597	0.33597	0.33597	0.33597	0.33597	0.33597	0.33597	0.33597	0.33597	0.33597	0.33597	0.33597	0.33597	0.33597	0.33597	0.33597	0.33597	0.33597	0.33597	0.33597	0.33597	0.33597	0.33597	0.33597	0.33597	0.33597	0.33597	0.33597	0.33597	0.33597	0.33597	0.33597	0.33597	0.33597	0.33597	0.33597	0.33597	0.33597	0.33597
47	0.33633	0.33633	0.33633	0.33633	0.33633	0.33633	0.33633	0.33633	0.33633	0.33633	0.33633	0.33633	0.33633	0.33633	0.33633	0.33633	0.33633	0.33633	0.33633	0.33633	0.33633	0.33633	0.33633	0.33633	0.33633	0.33633	0.33633	0.33633	0.33633	0.33633	0.33633	0.33633	0.33633	0.33633	0.33633	0.33633	0.33633	0.33633	0.33633	0.33633	0.33633	0.33633	0.33633	0.33633	0.33633	0.33633	0.33633	0.33633	0.33633
48	0.33654	0.33654	0.33654	0.33654	0.33654	0.33654	0.33654	0.33654	0.33654	0.33654	0.33654	0.33654	0.33654	0.33654	0.33654	0.33654	0.33654	0.33654	0.33654	0.33654	0.33654	0.33654	0.33654	0.33654	0.33654	0.33654	0.33654	0.33654	0.33654	0.33654	0.33654	0.33654	0.33654	0.33654	0.33654	0.33654	0.33654	0.33654	0.33654	0.33654	0.33654	0.33654	0.33654	0.33654	0.33654	0.33654	0.33654	0.33654	0.33654
49	0.33661	0.33661	0.33661	0.33661	0.33661	0.33661	0.33661	0.33661	0.33661	0.33661	0.33661	0.33661	0.33661	0.33661	0.33661	0.33661	0.33661	0.33661	0.33661	0.33661	0.33661	0.33661	0.33661	0.33661	0.33661	0.33661	0.33661	0.33661	0.33661	0.33661	0.33661	0.33661	0.33661	0.33661	0.33661	0.33661	0.33661	0.33661	0.33661	0.33661	0.33661	0.33661	0.33661	0.33661	0.33661	0.33661	0.33661	0.33661	0.33661
50	0.33655	0.33655	0.33655	0.33655	0.33655	0.33655	0.33655	0.33655	0.33655	0.33655	0.33655	0.33655	0.33655	0.33655	0.33655	0.33655	0.33655	0.33655	0.33655	0.33655	0.33655	0.33655	0.33655	0.33655	0.33655	0.33655	0.33655	0.33655	0.33655	0.33655	0.33655	0.33655	0.33655	0.33655	0.33655	0.33655	0.33655	0.33655	0.33655	0.33655	0.33655	0.33655	0.33655	0.33655	0.33655	0.33655	0.33655	0.33655	0.33655
51	0.33637	0.33637	0.33637	0.33637	0.33637	0.33637	0.33637	0.33637	0.33637	0.33637	0.33637	0.33637	0.33637	0.33637	0.33637	0.33637	0.33637	0.33637	0.33637	0.33637	0.33637	0.33637	0.33637	0.33637	0.33637	0.33637	0.33637	0.33637	0.33637	0.33637	0.33637	0.33637	0.33637	0.33637	0.33637	0.33637	0.33637	0.33637	0.33637	0.33637	0.33637	0.33637	0.33637	0.33637	0.33637	0.33637	0.33637	0.33637	0.33637
52	0.33608	0.33608	0.33608	0.33608	0.33608	0.33608	0.33608	0.33608	0.33608	0.33608	0.33608	0.33608	0.33608	0.33608	0.33608	0.33608	0.33608	0.33608	0.33608	0.33608	0.33608	0.33608	0.33608	0.33608	0.33608	0.33608	0.33608	0.33608	0.33608	0.33608	0.33608	0.33608	0.33608	0.33608	0.33608	0.33608	0.33608	0.33608	0.33608	0.33608	0.33608	0.33608	0.33608	0.33608	0.33608	0.33608	0.33608	0.33608	0.33608
53	0.33569	0.33569	0.33569	0.33569	0.33569	0.33569	0.33569	0.33569	0.33569	0.33569	0.33569	0.33569	0.33569	0.33569	0.33569	0.33569	0.33569	0.33569	0.33569	0.33569	0.33569	0.33569	0.33569	0.33569	0.33569	0.33569	0.33569	0.33569	0.33569	0.33569	0.33569	0.33569	0.33569	0.33569	0.33569	0.33569	0.33569	0.33569	0.33569	0.33569	0.33569	0.33569	0.33569	0.33569	0.33569	0.33569	0.33569	0.33569	0.33569
54	0.33521	0.33521	0.33521	0.33521	0.33521	0.33521	0.33521	0.33521	0.33521	0.33521	0.33521	0.33521	0.33521	0.33521	0.33521	0.33521	0.33521	0.33521	0.33521	0.33521	0.33521	0.33521	0.33521	0.33521	0.33521	0.33521	0.33521	0.33521	0.33521	0.33521	0.33521	0.33521	0.33521	0.33521	0.33521	0.33521	0.33521	0.33521	0.33521	0.33521	0.33521	0.33521	0.33521	0.33521	0.33521	0.33521	0.33521	0.33521	0.33521
55	0.33466	0.33466	0.33466	0.33466	0.33466	0.33466	0.33466	0.33466	0.33466	0.33466	0.33466	0.33466	0.33466	0.33466	0.33466	0.33466	0.33466	0.33466	0.33466	0.33466	0.33466	0.33466	0.33466	0.33466	0.33466	0.33466	0.33466	0.33466	0.33466	0.33466	0.33466	0.33466	0.33466	0.33466	0.33466	0.33466	0.33466	0.33466	0.33466	0.33466	0.33466	0.33466	0.33466	0.33466	0.33466	0.33466	0.33466	0.33466	0.33466
56	0.33405	0.33405	0.33405	0.33405	0.33405	0.33405	0.33405	0.33405	0.33405	0.33405	0.33405	0.33405	0.33405	0.33405	0.33405	0.33405	0.33405	0.33405	0.33405	0.33405	0.33405	0.33405	0.33405	0.33405	0.33405	0.33405	0.33405	0.33405	0.33405	0.33405	0.33405	0.33405	0.33405	0.33405	0.33405	0.33405	0.33405	0.33405	0.33405	0.33405	0.33405	0.33405	0.33405	0.33405	0.33405	0.33405	0.33405	0.33405	0.33405
57	0.3334	0.3334	0.3334	0.3334	0.3334	0.3334	0.3334	0.3334	0.3334	0.3334	0.3334	0.3334	0.3334	0.3334	0.3334	0.3334	0.3334	0.3334	0.3334	0.3334	0.3334	0.3334	0.3334	0.3334	0.3334	0.3334	0.3334	0.3334	0.3334	0.3334	0.3334	0.3334	0.3334	0.3334	0.3334	0.3334	0.3334	0.3334	0.3334	0.3334	0.3334	0.3334	0.3334	0.3334	0.3334	0.3334	0.3334	0.3334	0.3334
58	0.33271	0.33271	0.33271	0.33271	0.33271	0.33271	0.33271	0.33271	0.33271	0.33271	0.33271	0.33271	0.33271	0.33271	0.33271	0.33271	0.33271	0.33271	0.33271	0.33271	0.33271	0.33271	0.33271	0.33271	0.33271	0.33271	0.33271	0.33271	0.33271	0.33271	0.33271	0.33271	0.33271	0.33271	0.33271	0.33271	0.33271	0.33271	0.33271	0.33271	0.33271	0.33271	0.33271	0.33271	0.33271	0.33271	0.33271	0.33271	0.33271
59	0.33198	0.33198	0.33198	0.33198	0.33198	0.33198	0.33198	0.33198	0.33198	0.33198	0.33198	0.33198	0.33198	0.33198	0.33198	0.33198	0.33198	0.33198	0.33198	0.33198	0.33198	0.33198	0.33198	0.33198	0.33198	0.33198	0.33198	0.33198	0.33198	0.33198	0.33198	0.33198	0.33198	0.33198	0.33198	0.33198	0.33198	0.33198	0.33198	0.33198	0.33198	0.33198	0.33198	0.33198	0.33198	0.33198	0.33198	0.33198	0.33198
60	0.33124	0.33124	0.33124	0.33124	0.33124	0.33124	0.33124	0.33124	0.33124	0.33124	0.33124	0.33124	0.33124	0.33124	0.33124	0.33124	0.33124	0.33124	0.33124	0.33124	0.33124	0.33124	0.33124	0.33124	0.33124	0.33124	0.33124	0.33124	0.33124	0.33124	0.33124	0.33124	0.33124	0.33124	0.33124	0.33124	0.33124	0.33124	0.33124	0.33124	0.33124	0.33124	0.33124	0.33124	0.33124	0.33124	0.33124	0.33124	0.33124
61	0.3305	0.3305	0.3305	0.3305	0.3305	0.3305	0.3305	0.3305	0.3305	0.3305	0.3305	0.3305	0.3305	0.3305	0.3305	0.3305	0.3305	0.3305	0.3305	0.3305	0.3305	0.3305	0.3305	0.3305	0.3305	0.3305	0.3305	0.3305	0.3305	0.3305	0.3305	0.3305	0.3305	0.3305	0.3305	0.3305	0.3305	0.3305	0.3305	0.3305	0.3305	0.3305	0.3305	0.3305	0.3305	0.3305	0.3305	0.3305	0.3305
62	0.32976	0.32976	0.32976	0.32976	0.32976	0.32976	0.32976	0.32976	0.32976	0.32976	0.32976	0.32976	0.32976	0.32976	0.32976	0.32976	0.32976	0.32976	0.32976	0.32976	0.32976	0.32976	0.32976	0.32976	0.32976	0.32976	0.32976	0.32976	0.32976	0.32976	0.32976	0.32976	0.32976	0.32976	0.32976	0.32976	0.32976	0.32976	0.32976	0.32976	0.32976	0.32976	0.32976	0.32976	0.32976	0.32976	0.32976	0.32976	0.32976
63	0.32903	0.32903	0.32903	0.32903	0.32903	0.32903	0.32903	0.32903	0.32903	0.32903	0.32903	0.32903	0.32903	0.32903	0.32903	0.32903	0.32903	0.32903	0.32903	0.32903	0.32903	0.32903	0.32903	0.32903	0.32903	0.32903	0.32903	0.32903	0.32903	0.32903	0.32903	0.32903	0.32903	0.32903	0.32903	0.32903	0.32903	0.32903	0.32903	0.32903	0.32903	0.32903	0.32903	0.32903	0.32903	0.32903	0.32903	0.32903	0.32903
64	0.32831	0.32831	0.32831	0.32831	0.32831	0.32831	0.32831	0.32831	0.32831	0.32831	0.32831	0.32831	0.32831	0.32831	0.32831	0.32831	0.32831	0.32831	0.32831	0.32831	0.32831	0.32831	0.32831	0.32831	0.32831	0.32831	0.32831	0.32831	0.32831	0.32831	0.32831	0.32831	0.32831	0.32831	0.32831	0.32831	0.32831	0.32831	0.32831	0.32831	0.32831	0.32831	0.32831	0.32831	0.32831	0.32831	0.32831	0.32831	0.32831
65	0.32761	0.32761	0.32761	0.32761	0.32761	0.32761	0.32761	0.32761	0.32761	0.32761	0.32761	0.32761	0.32761	0.32761	0.32761	0.32761	0.32761	0.32761	0.32761	0.32761	0.32761	0.32761	0.32761	0.32761	0.32761	0.32761	0.32761	0.32761	0.32761	0.32761	0.32761	0.32761	0.32761	0.32761	0.32761	0.32761	0.32761	0.32761	0.32761	0.32761	0.32761	0.32761	0.32761	0.32761	0.32761	0.32761	0.32761	0.32761	0.32761
66	0.32694	0.32694	0.32694	0.32694	0.32694	0.32694	0.32694	0.32694	0.32694	0.32694	0.32694	0.32694	0.32694	0.32694	0.32694	0.32694	0.32694	0.32694	0.32694	0.32694	0.32694	0.32694	0.32694	0.32694	0.32694	0.32694	0.32694	0.32694	0.32694	0.32694	0.32694	0.32694	0.32694	0.32694	0.32694	0.32694	0.32694	0.32694	0.32694	0.32694	0.32694	0.32694	0.32694	0.32694	0.32694	0.32694	0.32694	0.32694	0.32694
67	0.3263	0.3263	0.3263	0.3263	0.3263	0.3263	0.3263	0.3263	0.3263	0.3263	0.3263	0.3263	0.3263	0.3263	0.3263	0.3263	0.3263	0.3263	0.3263	0.3263	0.3263	0.3263	0.3263	0.3263	0.3263	0.3263	0.3263	0.3263	0.3263	0.3263	0.3263	0.3263	0.3263	0.3263	0.3263	0.3263	0.3263	0.3263	0.3263	0.3263	0.3263	0.3263	0.3263	0.3263	0.3263	0.3263	0.3263	0.3263	0.3263
68	0.3257	0.3257	0.3257	0.3257	0.3257	0.3257	0.3257	0.3257	0.3257	0.3257	0.3257	0.3257	0.3257	0.3257	0.3257	0.3257	0.3257	0.3257	0.3257	0.3257	0.3257	0.3257	0.3257	0.3257	0.3257	0.3257	0.3257	0.3257	0.3257	0.3257	0.3257	0.3257	0.3257	0.3257	0.3257	0.3257	0.3257	0.3257	0.3257	0.3257	0.3257	0.3257	0.3257	0.3257	0.3257	0.3257	0.3257	0.3257	0.3257
69	0.32513	0.32513	0.32513	0.32513	0.32513	0.32513	0.32513	0.32513	0.32513	0.32513	0.32513	0.32513	0.32513	0.32513	0.32513	0.32513	0.32513	0.32513	0.32513	0.32513	0.32513	0.32513	0.32513	0.32513	0.32513	0.32513	0.32513	0.32513	0.32513	0.32513	0.32513	0.32513	0.32513	0.32513	0.32513	0.32513	0.32513	0.32513	0.32513	0.32513	0.32513	0.32513	0.32513	0.32513	0.32513	0.32513	0.32513	0.32513	0.32513
70	0.32461	0.32461	0.32461	0.32461	0.32461	0.32461	0.32461	0.32461	0.32461	0.32461	0.32461	0.32461	0.32461	0.32461	0.32461	0.32461	0.32461	0.32461	0.32461	0.32461	0.32461	0.32461	0.32461	0.32461	0.32461	0.32461	0.32461	0.32461	0.32461	0.32461	0.32461	0.32461	0.32461	0.32461	0.32461	0.32461	0.32461	0.32461	0.32461	0.32461	0.32461	0.32461	0.32461	0.32461	0.32461	0.32461	0.32461	0.32461	0.32461
71	0.32413	0.32413	0.32413	0.32413	0.32413	0.32413	0.32413	0.32413	0.32413	0.32413	0.32413	0.32413	0.32413	0.32413	0.32413	0.32413	0.32413	0.32413	0.32413	0.32413	0.32413	0.32413	0.32413	0.32413	0.32413	0.32413	0.32413	0.32413	0.32413	0.32413	0.32413	0.32413	0.32413	0.32413	0.32413	0.32413	0.32413	0.32413	0.32413	0.32413	0.32413	0.32413	0.32413	0.32413	0.32413	0.32413	0.32413	0.32413	0.32413
72	0.3237	0.3237	0.3237	0.3237	0.3237	0.3237	0.3237	0.3237	0.3237	0.3237	0.3237	0.3237	0.3237	0.3237	0.3237	0.3237	0.3237	0.3237	0.3237	0.3237	0.3237	0.3237	0.3237	0.3237	0.3237	0.3237	0.3237	0.3237	0.3237	0.3237	0.3237	0.3237	0.3237	0.3237	0.3237	0.3237	0.3237	0.3237	0.3237	0.3237	0.3237	0.3237	0.3237	0.3237	0.3237	0.3237	0.3237	0.3237	0.3237
73	0.32331	0.32331	0.32331	0.32331	0.32331	0.32331	0.32331	0.32331	0.32331	0.32331	0.32331	0.32331	0.32331	0.32331	0.32331	0.32331	0.32331	0.32331	0.32331	0.32331	0.32331	0.32331	0.32331	0.32331	0.32331	0.32331	0.32331	0.32331	0.32331	0.32331	0.32331	0.32331	0.32331	0.32331	0.32331	0.32331	0.32331	0.32331	0.32331	0.32331	0.32331	0.32331	0.32331	0.32331	0.32331	0.32331	0.32331	0.32331	0.32331
74	0.32297	0.32297	0.32297	0.32297	0.32297	0.32297	0.32297	0.32297	0.32297	0.32297	0.32297	0.32297	0.32297	0.32297	0.32297	0.32297	0.32297	0.32297	0.32297	0.32297	0.32297	0.32297	0.32297	0.32297	0.32297	0.32297	0.32297	0.32297	0.32297	0.32297	0.32297	0.32297	0.32297	0.32297	0.32297	0.32297	0.32297	0.32297	0.32297	0.32297	0.32297	0.32297	0.32297	0.32297	0.32297	0.32297	0.32297	0.32297	0.32297
75	0.32267	0.32267	0.32267	0.32267	0.32267	0.32267	0.32267	0.32267	0.32267	0.32267	0.32267	0.32267	0.32267	0.32267	0.32267	0.32267	0.32267	0.32267	0.32267	0.32267	0.32267	0.32267	0.32267	0.32267	0.32267	0.32267	0.32267	0.32267	0.32267	0.32267	0.32267	0.32267	0.32267	0.32267	0.32267	0.32267	0.32267	0.32267	0.32267	0.32267	0.32267	0.32267	0.32267	0.32267	0.32267	0.32267	0.32267	0.32267	0.32267
76	0.32242	0.32242	0.32242	0.32242	0.32242	0.32242	0.32242	0.32242	0.32242	0.32242	0.32242	0.32242	0.32242	0.32242	0.32242	0.32242	0.32242	0.32242	0.32242	0.32242	0.32242	0.32242	0.32242	0.32242	0.32242	0.32242	0.32242	0.32242	0.32242	0.32242	0.32242	0.32242	0.32242	0.32242	0.32242	0.32242	0.32242	0.32242	0.32242	0.32242	0.32242	0.32242	0.32242	0.32242	0.32242	0.32242	0.32242	0.32242	0.32242
77	0.32221	0.32221	0.32221	0.32221	0.32221	0.32221	0.32221	0.32221	0.32221	0.32221	0.32221	0.32221	0.32221	0.32221	0.32221	0.32221	0.32221	0.32221	0.32221	0.32221	0.32221	0.32221	0.32221	0.32221	0.32221	0.32221	0.32221	0.32221	0.32221	0.32221	0.32221	0.32221	0.32221	0.32221	0.32221	0.32221	0.32221	0.32221	0.32221	0.32221	0.32221	0.32221	0.32221	0.32221	0.32221	0.32221	0.32221	0.32221	0.32221
78	0.32204	0.32204	0.32204	0.32204	0.32204	0.32204	0.32204	0.32204	0.32204	0.32204	0.32204	0.32204	0.32204	0.32204	0.32204	0.32204	0.32204	0.32204	0.32204	0.32204	0.32204	0.32204	0.32204	0.32204	0.32204	0.32204	0.32204	0.32204	0.32204	0.32204	0.32204	0.32204	0.32204	0.32204	0.32204	0.32204	0.32204	0.32204	0.32204	0.32204	0.32204	0.32204	0.32204	0.32204	0.32204	0.32204	0.32204	0.32204	0.32204
79	0.32191	0.32191	0.32191	0.32191	0.32191	0.32191	0.32191	0.32191	0.32191	0.32191	0.32191	0.32191	0.32191	0.32191	0.32191	0.32191	0.32191	0.32191	0.32191	0.32191	0.32191	0.32191	0.32191	0.32191	0.32191	0.32191	0.32191	0.32191	0.32191	0.32191	0.32191	0.32191	0.32191	0.32191	0.32191	0.32191	0.32191	0.32191	0.32191	0.32191	0.32191	0.32191	0.32191	0.32191	0.32191	0.32191	0.32191	0.32191	0.32191
80	0.32182	0.32182	0.32182	0.32182	0.32182	0.32182	0.32182	0.32182	0.32182	0.32182	0.32182	0.32182	0.32182	0.32182	0.32182	0.32182	0.32182	0.32182	0.32182	0.32182	0.32182	0.32182	0.32182	0.32182	0.32182	0.32182	0.32182	0.32182	0.32182	0.32182	0.32182	0.32182	0.32182	0.32182	0.32182	0.32182	0.32182	0.32182	0.32182	0.32182	0.32182	0.32182	0.32182	0.32182	0.32182	0.32182	0.32182	0.32182	0.32182
81	0.32176	0.32176	0.32176	0.32176	0.32176	0.32176	0.32176	0.32176	0.32176	0.32176	0.32176	0.32176	0.32176	0.32176	0.32176	0.32176	0.32176	0.32176	0.32176	0.32176	0.32176	0.32176	0.32176	0.32176	0.32176	0.32176	0.32176	0.32176	0.32176	0.32176	0.32176	0.32176	0.32176	0.32176	0.32176	0.32176	0.32176	0.32176	0.32176	0.32176	0.32176	0.32176	0.32176	0.32176	0.32176	0.32176	0.32176	0.32176	0.32176
82	0.32173	0.32173	0.32173	0.32173	0.32173	0.32173	0.32173	0.32173	0.32173	0.32173	0.32173	0.32173	0.32173	0.32173	0.32173	0.32173	0.32173	0.32173	0.32173	0.32173	0.32173	0.32173	0.32173	0.32173	0.32173	0.32173	0.32173	0.32173	0.32173	0.32173	0.32173	0.32173	0.32173	0.32173	0.32173	0.32173	0.32173	0.32173	0.32173	0.32173	0.32173	0.32173	0.32173	0.32173	0.32173	0.32173	0.32173	0.32173	0.32173
83	0.32173	0.32173	0.32173	0.32173	0.32173	0.32173	0.32173	0.32173	0.32173	0.32173	0.32173	0.32173	0.32173	0.32173	0.32173	0.32173	0.32173	0.32173	0.32173	0.32173	0.32173	0.32173	0.32173	0.32173	0.32173	0.32173	0.32173	0.32173	0.32173	0.32173	0.32173	0.32173	0.32173	0.32173	0.32173	0.32173	0.32173	0.32173	0.32173	0.32173	0.32173	0.32173	0.32173	0.32173	0.32173	0.32173	0.32173	0.32173	0.32173
84	0.32177	0.32177	0.32177	0.32177	0.32177	0.32177	0.32177	0.32177	0.32177	0.32177	0.32177	0.32177	0.32177	0.32177	0.32177	0.32177	0.32177	0.32177	0.32177	0.32177	0.32177	0.32177	0.32177	0.32177	0.32177	0.32177	0.32177	0.32177	0.32177	0.32177	0.32177	0.32177	0.32177	0.32177	0.32177	0.32177	0.32177	0.32177	0.32177	0.32177	0.32177	0.32177	0.32177	0.32177	0.32177	0.32177	0.32177	0.32177	0.32177
85	0.32182	0.32182	0.32182	0.32182	0.32182	0.32182	0.32182	0.32182	0.32182	0.32182	0.32182	0.32182	0.32182	0.32182	0.32182	0.32182	0.32182	0.32182	0.32182	0.32182	0.32182	0.32182	0.32182	0.32182	0.32182	0.32182	0.32182	0.32182	0.32182	0.32182	0.32182	0.32182	0.32182	0.32182	0.32182	0.32182	0.32182	0.32182	0.32182	0.32182	0.32182	0.32182	0.32182	0.32182	0.32182	0.32182	0.32182	0.32182	0.32182
86	0.3219	0.3219	0.3219	0.3219	0.3219	0.3219	0.3219	0.3219	0.3219	0.3219	0.3219	0.3219	0.3219	0.3219	0.3219	0.3219	0.3219	0.3219	0.3219	0.3219	0.3219	0.3219	0.3219	0.3219	0.3219	0.3219	0.3219	0.3219	0.3219	0.3219	0.3219	0.3219	0.3219	0.3219	0.3219	0.3219	0.3219	0.3219	0.3219	0.3219	0.3219	0.3219	0.3219	0.3219	0.3219	0.3219	0.3219	0.3219	0.3219
87	0.322	0.322	0.322	0.322	0.322	0.322	0.322	0.322	0.322	0.322	0.322	0.322	0.322	0.322	0.322	0.322	0.322	0.322	0.322	0.322	0.322	0.322	0.322	0.322	0.322	0.322	0.322	0.322	0.322	0.322	0.322	0.322	0.322	0.322	0.322	0.322	0.322	0.322	0.322	0.322	0.322	0.322	0.322	0.322	0.322	0.322	0.322	0.322	0.322
88	0.3221	0.3221	0.3221	0.3221	0.3221	0.3221	0.3221	0.3221	0.3221	0.3221	0.3221	0.3221	0.3221	0.3221	0.3221	0.3221	0.3221	0.3221	0.3221	0.3221	0.3221	0.3221	0.3221	0.3221	0.3221	0.3221	0.3221	0.3221	0.3221	0.3221	0.3221	0.3221	0.3221	0.3221	0.3221	0.3221	0.3221	0.3221	0.3221	0.3221	0.3221	0.3221	0.3221	0.3221	0.3221	0.3221	0.3221	0.3221	0.3221
89	0.32222	0.32222	0.32222	0.32222	0.32222	0.32222	0.32222	0.32222	0.32222	0.32222	0.32222	0.32222	0.32222	0.32222	0.32222	0.32222	0.32222	0.32222	0.32222	0.32222	0.32222	0.32222	0.32222	0.32222	0.32222	0.32222	0.32222	0.32222	0.32222	0.32222	0.32222	0.32222	0.32222	0.32222	0.32222	0.32222	0.32222	0.32222	0.32222	0.32222	0.32222	0.32222	0.32222	0.32222	0.32222	0.32222	0.32222	0.32222	0.32222
90	0.32236	0.32236	0.32236	0.32236	0.32236	0.32236	0.32236	0.32236	0.32236	0.32236	0.32236	0.32236	0.32236	0.32236	0.32236	0.32236	0.32236	0.32236	0.32236	0.32236	0.32236	0.32236	0.32236	0.32236	0.32236	0.32236	0.32236	0.32236	0.32236	0.32236	0.32236	0.32236	0.32236	0.32236	0.32236	0.32236	0.32236	0.32236	0.32236	0.32236	0.32236	0.32236	0.32236	0.32236	0.32236	0.32236	0.32236	0.32236	0.32236
91	0.32251	0.32251	0.32251	0.32251	0.32251	0.32251	0.32251	0.32251	0.32251	0.32251	0.32251	0.32251	0.32251	0.32251	0.32251	0.32251	0.32251	0.32251	0.32251	0.32251	0.32251	0.32251	0.32251	0.32251	0.32251	0.32251	0.32251	0.32251	0.32251	0.32251	0.32251	0.32251	0.32251	0.32251	0.32251	0.32251	0.32251	0.32251	0.32251	0.32251	0.32251	0.32251	0.32251	0.32251	0.32251	0.32251	0.32251	0.32251	0.32251
92	0.32266	0.32266	0.32266	0.32266	0.32266	0.32266	0.32266	0.32266	0.32266	0.32266	0.32266	0.32266	0.32266	0.32266	0.32266	0.32266	0.32266	0.32266	0.32266	0.32266	0.32266	0.32266	0.32266	0.32266	0.32266	0.32266	0.32266	0.32266	0.32266	0.32266	0.32266	0.32266	0.32266	0.32266	0.32266	0.32266	0.32266	0.32266	0.32266	0.32266	0.32266	0.32266	0.32266	0.32266	0.32266	0.32266	0.32266	0.32266	0.32266
93	0.32282	0.32282	0.32282	0.32282	0.32282	0.32282	0.32282	0.32282	0.32282	0.32282	0.32282	0.32282	0.32282	0.32282	0.32282	0.32282	0.32282	0.32282	0.32282	0.32282	0.32282	0.32282	0.32282	0.32282	0.32282	0.32282	0.32282	0.32282	0.32282	0.32282	0.32282	0.32282	0.32282	0.32282	0.32282	0.32282	0.32282	0.32282	0.32282	0.32282	0.32282	0.32282	0.32282	0.32282	0.32282	0.32282	0.32282	0.32282	0.32282
94	0.32297	0.32297	0.32297	0.32297	0.32297	0.32297	0.32297	0.32297	0.32297	0.32297	0.32297	0.32297	0.32297	0.32297	0.32297	0.32297	0.32297	0.32297	0.32297	0.32297	0.32297	0.32297	0.32297	0.32297	0.32297	0.32297	0.32297	0.32297	0.32297	0.32297	0.32297	0.32297	0.32297	0.32297	0.32297	0.32297	0.32297	0.32297	0.32297	0.32297	0.32297	0.32297	0.32297	0.32297	0.32297	0.32297	0.32297	0.32297	0.32297
95	0.32313	0.32313	0.32313	0.32313	0.32313	0.32313	0.32313	0.32313	0.32313	0.32313	0.32313	0.32313	0.32313	0.32313	0.32313	0.32313	0.32313	0.32313	0.32313	0.32313	0.32313	0.32313	0.32313	0.32313	0.32313	0.32313	0.32313	0.32313	0.32313	0.32313	0.32313	0.32313	0.32313	0.32313	0.32313	0.32313	0.32313	0.32313	0.32313	0.32313	0.32313	0.32313	0.32313	0.32313	0.32313	0.32313	0.32313	0.32313	0.32313
96	0.3233	0.3233	0.3233	0.3233	0.3233	0.3233	0.3233	0.3233	0.3233	0.3233	0.3233	0.3233	0.3233	0.3233	0.3233	0.3233	0.3233	0.3233	0.3233	0.3233	0.3233	0.3233	0.3233	0.3233	0.3233	0.3233	0.3233	0.3233	0.3233	0.3233	0.3233	0.3233	0.3233	0.3233	0.3233	0.3233	0.3233	0.3233	0.3233	0.3233	0.3233	0.3233	0.3233	0.3233	0.3233	0.3233	0.3233	0.3233	0.3233
97	0.32346	0.32346	0.32346	0.32346	0.32346	0.32346	0.32346	0.32346	0.32346	0.32346	0.32346	0.32346	0.32346	0.32346	0.32346	0.32346	0.32346	0.32346	0.32346	0.32346	0.32346	0.32346	0.32346	0.32346	0.32346	0.32346	0.32346	0.32346	0.32346	0.32346	0.32346	0.32346	0.32346	0.32346	0.32346	0.32346	0.32346	0.32346	0.32346	0.32346	0.32346	0.32346	0.32346	0.32346	0.32346	0.32346	0.32346	0.32346	0.32346
98	0.32361	0.32361	0.32361	0.32361	0.32361	0.32361	0.32361	0.32361	0.32361	0.32361	0.32361	0.32361	0.32361	0.32361	0.32361	0.32361	0.32361	0.32361	0.32361	0.32361	0.32361	0.32361	0.32361	0.32361	0.32361	0.32361	0.32361	0.32361	0.32361	0.32361	0.32361	0.32361	0.32361	0.32361	0.32361	0.32361	0.32361	0.32361	0.32361	0.32361	0.32361	0.32361	0.32361	0.32361	0.32361	0.32361	0.32361	0.32361	0.32361
99	0.32376	0.32376	0.32376	0.32376	0.32376	0.32376	0.32376	0.32376	0.32376	0.32376	0.32376	0.32376	0.32376	0.32376	0.32376	0.32376	0.32376	0.32376	0.32376	0.32376	0.32376	0.32376	0.32376	0.32376	0.32376	0.32376	0.32376	0.32376	0.32376	0.32376	0.32376	0.32376	0.32376	0.32376	0.32376	0.32376	0.32376	0.32376	0.32376	0.32376	0.32376	0.32376	0.32376	0.32376	0.32376	0.32376	0.32376	0.32376	0.32376
100	0.32391	0.32391	0.32391	0.32391	0.32391	0.32391	0.32391	0.32391	0.32391	0.32391	0.32391	0.32391	0.32391	0.32391	0.32391	0.32391	0.32391	0.32391	0.32391	0.32391	0.32391	0.32391	0.32391	0.32391	0.32391	0.32391	0.32391	0.32391	0.32391	0.32391	0.32391	0.32391	0.32391	0.32391	0.32391	0.32391	0.32391	0.32391	0.32391	0.32391	0.32391	0.32391	0.32391	0.32391	0.32391	0.32391	0.32391	0.32391	0.32391
101	0.32405	0.32405	0.32405	0.32405	0.32405	0.32405	0.32405	0.32405	0.32405	0.32405	0.32405	0.32405	0.32405	0.32405	0.32405	0.32405	0.32405	0.32405	0.32405	0.32405	0.32405	0.32405	0.32405	0.32405	0.32405	0.32405	0.32405	0.32405	0.32405	0.32405	0.32405	0.32405	0.32405	0.32405	0.32405	0.32405	0.32405	0.32405	0.32405	0.32405	0.32405	0.32405	0.32405	0.32405	0.32405	0.32405	0.32405	0.32405	0.32405
102	0.32418	0.32418	0.32418	0.32418	0.32418	0.32418	0.32418	0.32418	0.32418	0.32418	0.32418	0.32418	0.32418	0.32418	0.32418	0.32418	0.32418	0.32418	0.32418	0.32418	0.32418	0.32418	0.32418	0.32418	0.32418	0.32418	0.32418	0.32418	0.32418	0.32418	0.32418	0.32418	0.32418	0.32418	0.32418	0.32418	0.32418	0.32418	0.32418	0.32418	0.32418	0.32418	0.32418	0.32418	0.32418	0.32418	0.32418	0.32418	0.32418
103	0.32431	0.32431	0.32431	0.32431	0.32431	0.32431	0.32431	0.32431	0.32431	0.32431	0.32431	0.32431	0.32431	0.32431	0.32431	0.32431	0.32431	0.32431	0.32431	0.32431	0.32431	0.32431	0.32431	0.32431	0.32431	0.32431	0.32431	0.32431	0.32431	0.32431	0.32431	0.32431	0.32431	0.32431	0.32431	0.32431	0.32431	0.32431	0.32431	0.32431	0.32431	0.32431	0.32431	0.32431	0.32431	0.32431	0.32431	0.32431	0.32431
104	0.32443	0.32443	0.32443	0.32443	0.32443	0.32443	0.32443	0.32443	0.32443	0.32443	0.32443	0.32443	0.32443	0.32443	0.32443	0.32443	0.32443	0.32443	0.32443	0.32443	0.32443	0.32443	0.32443	0.32443	0.32443	0.32443	0.32443	0.32443	0.32443	0.32443	0.32443	0.32443	0.32443	0.32443	0.32443	0.32443	0.32443	0.32443	0.32443	0.32443	0.32443	0.32443	0.32443	0.32443	0.32443	0.32443	0.32443	0.32443	0.32443
105	0.32454	0.32454	0.32454	0.32454	0.32454	0.32454	0.32454	0.32454	0.32454	0.32454	0.32454	0.32454	0.32454	0.32454	0.32454	0.32454	0.32454	0.32454	0.32454	0.32454	0.32454	0.32454	0.32454	0.32454	0.32454	0.32454	0.32454	0.32454	0.32454	0.32454	0.32454	0.32454	0.32454	0.32454	0.32454	0.32454	0.32454	0.32454	0.32454	0.32454	0.32454	0.32454	0.32454	0.32454	0.32454	0.32454	0.32454	0.32454	0.32454
106	0.32464	0.32464	0.32464	0.32464	0.32464	0.32464	0.32464	0.32464	0.32464	0.32464	0.32464	0.32464	0.32464	0.32464	0.32464	0.32464	0.32464	0.32464	0.32464	0.32464	0.32464	0.32464	0.32464	0.32464	0.32464	0.32464	0.32464	0.32464	0.32464	0.32464	0.32464	0.32464	0.32464	0.32464	0.32464	0.32464	0.32464	0.32464	0.32464	0.32464	0.32464	0.32464	0.32464	0.32464	0.32464	0.32464	0.32464	0.32464	0.32464
107	0.32473	0.32473	0.32473	0.32473	0.32473	0.32473	0.32473	0.32473	0.32473	0.32473	0.32473	0.32473	0.32473	0.32473	0.32473	0.32473	0.32473	0.32473	0.32473	0.32473	0.32473	0.32473	0.32473	0.32473	0.32473	0.32473	0.32473	0.32473	0.32473	0.32473	0.32473	0.32473	0.32473	0.32473	0.32473	0.32473	0.32473	0.32473	0.32473	0.32473	0.32473	0.32473	0.32473	0.32473	0.32473	0.32473	0.32473	0.32473	0.32473
108	0.32481	0.32481	0.32481	0.32481	0.32481	0.32481	0.32481	0.32481	0.32481	0.32481	0.32481	0.32481	0.32481	0.32481	0.32481	0.32481	0.32481	0.32481	0.32481	0.32481	0.32481	0.32481	0.32481	0.32481	0.32481	0.32481	0.32481	0.32481	0.32481	0.32481	0.32481	0.32481	0.32481	0.32481	0.32481	0.32481	0.32481	0.32481	0.32481	0.32481	0.32481	0.32481	0.32481	0.32481	0.32481	0.32481	0.32481	0.32481	0.32481
109	0.32488	0.32488	0.32488	0.32488	0.32488	0.32488	0.32488	0.32488	0.32488	0.32488	0.32488	0.32488	0.32488	0.32488	0.32488	0.32488	0.32488	0.32488	0.32488	0.32488	0.32488	0.32488	0.32488	0.32488	0.32488	0.32488	0.32488	0.32488	0.32488	0.32488	0.32488	0.32488	0.32488	0.32488	0.32488	0.32488	0.32488	0.32488	0.32488	0.32488	0.32488	0.32488	0.32488	0.32488	0.32488	0.32488	0.32488	0.32488	0.32488
110	0.32494	0.32494	0.32494	0.32494	0.32494	0.32494	0.32494	0.32494	0.32494	0.32494	0.32494	0.32494	0.32494	0.32494	0.32494	0.32494	0.32494	0.32494	0.32494	0.32494	0.32494	0.32494	0.32494	0.32494	0.32494	0.32494	0.32494	0.32494	0.32494	0.32494	0.32494	0.32494	0.32494	0.32494	0.32494	0.32494	0.32494	0.32494	0.32494	0.32494	0.32494	0.32494	0.32494	0.32494	0.32494	0.32494	0.32494	0.32494	0.32494
111	0.32499	0.32499	0.32499	0.32499	0.32499	0.32499	0.32499	0.32499	0.32499	0.32499	0.32499	0.32499	0.32499	0.32499	0.32499	0.32499	0.32499	0.32499	0.32499	0.32499	0.32499	0.32499	0.32499	0.32499	0.32499	0.32499	0.32499	0.32499	0.32499	0.32499	0.32499	0.32499	0.32499	0.32499	0.32499	0.32499	0.32499	0.32499	0.32499	0.32499	0.32499	0.32499	0.32499	0.32499	0.32499	0.32499	0.32499	0.32499	0.32499
112	0.32503	0.32503	0.32503	0.32503	0.32503	0.32503	0.32503	0.32503	0.32503	0.32503	0.32503	0.32503	0.32503	0.32503	0.32503	0.32503	0.32503	0.32503	0.32503	0.32503	0.32503	0.32503	0.32503	0.32503	0.32503	0.32503	0.32503	0.32503	0.32503	0.32503	0.32503	0.32503	0.32503	0.32503	0.32503	0.32503	0.32503	0.32503	0.32503	0.32503	0.32503	0.32503	0.32503	0.32503	0.32503	0.32503	0.32503	0.32503	0.32503
113	0.32507	0.32507	0.32507	0.32507	0.32507	0.32507	0.32507	0.32507	0.32507	0.32507	0.32507	0.32507	0.32507	0.32507	0.32507	0.32507	0.32507	0.32507	0.32507	0.32507	0.32507	0.32507	0.32507	0.32507	0.32507	0.32507	0.32507	0.32507	0.32507	0.32507	0.32507	0.32507	0.32507	0.32507	0.32507	0.32507	0.32507	0.32507	0.32507	0.32507	0.32507	0.32507	0.32507	0.32507	0.32507	0.32507	0.32507	0.32507	0.32507
114	0.3251	0.3251	0.3251	0.3251	0.3251	0.3251	0.3251	0.3251	0.3251	0.3251	0.3251	0.3251	0.3251	0.3251	0.3251	0.3251	0.3251	0.3251	0.3251	0.3251	0.3251	0.3251	0.3251	0.3251	0.3251	0.3251	0.3251	0.3251	0.3251	0.3251	0.3251	0.3251	0.3251	0.3251	0.3251	0.3251	0.3251	0.3251	0.3251	0.3251	0.3251	0.3251	0.3251	0.3251	0.3251	0.3251	0.3251	0.3251	0.3251
115	0.32512	0.32512	0.32512	0.32512	0.32512	0.32512	0.32512	0.32512	0.32512	0.32512	0.32512	0.32512	0.32512	0.32512	0.32512	0.32512	0.32512	0.32512	0.32512	0.32512	0.32512	0.32512	0.32512	0.32512	0.32512	0.32512	0.32512	0.32512	0.32512	0.32512	0.32512	0.32512	0.32512	0.32512	0.32512	0.32512	0.32512	0.32512	0.32512	0.32512	0.32512	0.32512	0.32512	0.32512	0.32512	0.32512	0.32512	0.32512	0.32512
116	0.32513	0.32513	0.32513	0.32513	0.32513	0.32513	0.32513	0.32513	0.32513	0.32513	0.32513	0.32513	0.32513	0.32513	0.32513	0.32513	0.32513	0.32513	0.32513	0.32513	0.32513	0.32513	0.32513	0.32513	0.32513	0.32513	0.32513	0.32513	0.32513	0.32513	0.32513	0.32513	0.32513	0.32513	0.32513	0.32513	0.32513	0.32513	0.32513	0.32513	0.32513	0.32513	0.32513	0.32513	0.32513	0.32513	0.32513	0.32513	0.32513
117	0.32513	0.32513	0.32513	0.32513	0.32513	0.32513	0.32513	0.32513	0.32513	0.32513	0.32513	0.32513	0.32513	0.32513	0.32513	0.32513	0.32513	0.32513	0.32513	0.32513	0.32513	0.32513	0.32513	0.32513	0.32513	0.32513	0.32513	0.32513	0.32513	0.32513	0.32513	0.32513	0.32513	0.32513	0.32513	0.32513	0.32513	0.32513	0.32513	0.32513	0.32513	0.32513	0.32513	0.32513	0.32513	0.32513	0.32513	0.32513	0.32513
118	0.32513	0.32513	0.32513	0.32513	0.32513	0.32513	0.32513	0.32513	0.32513	0.32513	0.32513	0.32513	0.32513	0.32513	0.32513	0.32513	0.32513	0.32513	0.32513	0.32513	0.32513	0.32513	0.32513	0.32513	0.32513	0.32513	0.32513	0.32513	0.32513	0.32513	0.32513	0.32513	0.32513	0.32513	0.32513	0.32513	0.32513	0.32513	0.32513	0.32513	0.32513	0.32513	0.32513	0.32513	0.32513	0.32513	0.32513	0.32513	0.32513
119	0.32512	0.32512	0.32512	0.32512	0.32512	0.32512	0.32512	0.32512	0.32512	0.32512	0.32512	0.32512	0.32512	0.32512	0.32512	0.32512	0.32512	0.32512	0.32512	0.32512	0.32512	0.32512	0.32512	0.32512	0.32512	0.32512	0.32512	0.32512	0.32512	0.32512	0.32512	0.32512	0.32512	0.32512	0.32512	0.32512	0.32512	0.32512	0.32512	0.32512	0.32512	0.32512	0.32512	0.32512	0.32512	0.32512	0.32512	0.32512	0.32512
120	0.3251	0.3251	0.3251	0.3251	0.3251	0.3251	0.3251	0.3251	0.3251	0.3251	0.3251	0.3251	0.3251	0.3251	0.3251	0.3251	0.3251	0.3251	0.3251	0.3251	0.3251	0.3251	0.3251	0.3251	0.3251	0.3251	0.3251	0.3251	0.3251	0.3251	0.3251	0.3251	0.3251	0.3251	0.3251	0.3251	0.3251	0.3251	0.3251	0.3251	0.3251	0.3251	0.3251	0.3251	0.3251	0.3251	0.3251	0.3251	0.3251
121	0.32508	0.32508	0.32508	0.32508	0.32508	0.32508	0.32508	0.32508	0.32508	0.32508	0.32508	0.32508	0.32508	0.32508	0.32508	0.32508	0.32508	0.32508	0.32508	0.32508	0.32508	0.32508	0.32508	0.32508	0.32508	0.32508	0.32508	0.32508	0.32508	0.32508	0.32508	0.32508	0.32508	0.32508	0.32508	0.32508	0.32508	0.32508	0.32508	0.32508	0.32508	0.32508	0.32508	0.32508	0.32508	0.32508	0.32508	0.32508	0.32508
122	0.32506	0.32506	0.32506	0.32506	0.32506	0.32506	0.32506	0.32506	0.32506	0.32506	0.32506	0.32506	0.32506	0.32506	0.32506	0.32506	0.32506	0.32506	0.32506	0.32506	0.32506	0.32506	0.32506	0.32506	0.32506	0.32506	0.32506	0.32506	0.32506	0.32506	0.32506	0.32506	0.32506	0.32506	0.32506	0.32506	0.32506	0.32506	0.32506	0.32506	0.32506	0.32506	0.32506	0.32506	0.32506	0.32506	0.32506	0.32506	0.32506
123	0.32504	0.32504	0.32504	0.32504	0.32504	0.32504	0.32504	0.32504	0.32504	0.32504	0.32504	0.32504	0.32504	0.32504	0.32504	0.32504	0.32504	0.32504	0.32504	0.32504	0.32504	0.32504	0.32504	0.32504	0.32504	0.32504	0.32504	0.32504	0.32504	0.32504	0.32504	0.32504	0.32504	0.32504	0.32504	0.32504	0.32504	0.32504	0.32504	0.32504	0.32504	0.32504	0.32504	0.32504	0.32504	0.32504	0.32504	0.32504	0.32504
124	0.32501	0.32501	0.32501	0.32501	0.32501	0.32501	0.32501	0.32501	0.32501	0.32501	0.32501	0.32501	0.32501	0.32501	0.32501	0.32501	0.32501	0.32501	0.32501	0.32501	0.32501	0.32501	0.32501	0.32501	0.32501	0.32501	0.32501	0.32501	0.32501	0.32501	0.32501	0.32501	0.32501	0.32501	0.32501	0.32501	0.32501	0.32501	0.32501	0.32501	0.32501	0.32501	0.32501	0.32501	0.32501	0.32501	0.32501	0.32501	0.32501
125	0.32498	0.32498	0.32498	0.32498	0.32498	0.32498	0.32498	0.32498	0.32498	0.32498	0.32498	0.32498	0.32498	0.32498	0.32498	0.32498	0.32498	0.32498	0.32498	0.32498	0.32498	0.32498	0.32498	0.32498	0.32498	0.32498	0.32498	0.32498	0.32498	0.32498	0.32498	0.32498	0.32498	0.32498	0.32498	0.32498	0.32498	0.32498	0.32498	0.32498	0.32498	0.32498	0.32498	0.32498	0.32498	0.32498	0.32498	0.32498	0.32498
126	0.32494	0.32494	0.32494	0.32494	0.32494	0.32494	0.32494	0.32494	0.32494	0.32494	0.32494	0.32494	0.32494	0.32494	0.32494	0.32494	0.32494	0.32494	0.32494	0.32494	0.32494	0.32494	0.32494	0.32494	0.32494	0.32494	0.32494	0.32494	0.32494	0.32494	0.32494	0.32494	0.32494	0.32494	0.32494	0.32494	0.32494	0.32494	0.32494	0.32494	0.32494	0.32494	0.32494	0.32494	0.32494	0.32494	0.32494	0.32494	0.32494
127	0.32491	0.32491	0.32491	0.32491	0.32491	0.32491	0.32491	0.32491	0.32491	0.32491	0.32491	0.32491	0.32491	0.32491	0.32491	0.32491	0.32491	0.32491	0.32491	0.32491	0.32491	0.32491	0.32491	0.32491	0.32491	0.32491	0.32491	0.32491	0.32491	0.32491	0.32491	0.32491	0.32491	0.32491	0.32491	0.32491	0.32491	0.32491	0.32491	0.32491	0.32491	0.32491	0.32491	0.32491	0.32491	0.32491	0.32491	0.32491	0.32491
128	0.32487	0.32487	0.32487	0.32487	0.32487	0.32487	0.32487	0.32487	0.32487	0.32487	0.32487	0.32487	0.32487	0.32487	0.32487	0.32487	0.32487	0.32487	0.32487	0.32487	0.32487	0.32487	0.32487	0.32487	0.32487	0.32487	0.32487	0.32487	0.32487	0.32487	0.32487	0.32487	0.32487	0.32487	0.32487	0.32487	0.32487	0.32487	0.32487	0.32487	0.32487	0.32487	0.32487	0.32487	0.32487	0.32487	0.32487	0.32487	0.32487
129	0.32484	0.32484	0.32484	0.32484	0.32484	0.32484	0.32484	0.32484	0.32484	0.32484	0.32484	0.32484	0.32484	0.32484	0.32484	0.32484	0.32484	0.32484	0.32484	0.32484	0.32484	0.32484	0.32484	0.32484	0.32484	0.32484	0.32484	0.32484	0.32484	0.32484	0.32484	0.32484	0.32484	0.32484	0.32484	0.32484	0.32484	0.32484	0.32484	0.32484	0.32484	0.32484	0.32484	0.32484	0.32484	0.32484	0.32484	0.32484	0.32484
130	0.32481	0.32481	0.32481	0.32481	0.32481	0.32481	0.32481	0.32481	0.32481	0.32481	0.32481	0.32481	0.32481	0.32481	0.32481	0.32481	0.32481	0.32481	0.32481	0.32481	0.32481	0.32481	0.32481	0.32481	0.32481	0.32481	0.32481	0.32481	0.32481	0.32481	0.32481	0.32481	0.32481	0.32481	0.32481	0.32481	0.32481	0.32481	0.32481	0.32481	0.32481	0.32481	0.32481	0.32481	0.32481	0.32481	0.32481	0.32481	0.32481
131	0.32478	0.32478	0.32478	0.32478	0.32478	0.32478	0.32478	0.32478	0.32478	0.32478	0.32478	0.32478	0.32478	0.32478	0.32478	0.32478	0.32478	0.32478	0.32478	0.32478	0.32478	0.32478	0.32478	0.32478	0.32478	0.32478	0.32478	0.32478	0.32478	0.32478	0.32478	0.32478	0.32478	0.32478	0.32478	0.32478	0.32478	0.32478	0.32478	0.32478	0.32478	0.32478	0.32478	0.32478	0.32478	0.32478	0.32478	0.32478	0.32478
132	0.32474	0.32474	0.32474	0.32474	0.32474	0.32474	0.32474	0.32474	0.32474	0.32474	0.32474	0.32474	0.32474	0.32474	0.32474	0.32474	0.32474	0.32474	0.32474	0.32474	0.32474	0.32474	0.32474	0.32474	0.32474	0.32474	0.32474	0.32474	0.32474	0.32474	0.32474	0.32474	0.32474	0.32474	0.32474	0.32474	0.32474	0.32474	0.32474	0.32474	0.32474	0.32474	0.32474	0.32474	0.32474	0.32474	0.32474	0.32474	0.32474
133	0.32471	0.32471	0.32471	0.32471	0.32471	0.32471	0.32471	0.32471	0.32471	0.32471	0.32471	0.32471	0.32471	0.32471	0.32471	0.32471	0.32471	0.32471	0.32471	0.32471	0.32471	0.32471	0.32471	0.32471	0.32471	0.32471	0.32471	0.32471	0.32471	0.32471	0.32471	0.32471	0.32471	0.32471	0.32471	0.32471	0.32471	0.32471	0.32471	0.32471	0.32471	0.32471	0.32471	0.32471	0.32471	0.32471	0.32471	0.32471	0.32471
134	0.32468	0.32468	0.32468	0.32468	0.32468	0.32468	0.32468	0.32468	0.32468	0.32468	0.32468	0.32468	0.32468	0.32468	0.32468	0.32468	0.32468	0.32468	0.32468	0.32468	0.32468	0.32468	0.32468	0.32468	0.32468	0.32468	0.32468	0.32468	0.32468	0.32468	0.32468	0.32468	0.32468	0.32468	0.32468	0.32468	0.32468	0.32468	0.32468	0.32468	0.32468	0.32468	0.32468	0.32468	0.32468	0.32468	0.32468	0.32468	0.32468
135	0.32465	0.32465	0.32465	0.32465	0.32465	0.32465	0.32465	0.32465	0.32465	0.32465	0.32465	0.32465	0.32465	0.32465	0.32465	0.32465	0.32465	0.32465	0.32465	0.32465	0.32465	0.32465	0.32465	0.32465	0.32465	0.32465	0.32465	0.32465	0.32465	0.32465	0.32465	0.32465	0.32465	0.32465	0.32465	0.32465	0.32465	0.32465	0.32465	0.32465	0.32465	0.32465	0.32465	0.32465	0.32465	0.32465	0.32465	0.32465	0.32465
136	0.32463	0.32463	0.32463	0.32463	0.32463	0.32463	0.32463	0.32463	0.32463	0.32463	0.32463	0.32463	0.32463	0.32463	0.32463	0.32463	0.32463	0.32463	0.32463	0.32463	0.32463	0.32463	0.32463	0.32463	0.32463	0.32463	0.32463	0.32463	0.32463	0.32463	0.32463	0.32463	0.32463	0.32463	0.32463	0.32463	0.32463	0.32463	0.32463	0.32463	0.32463	0.32463	0.32463	0.32463	0.32463	0.32463	0.32463	0.32463	0.32463
137	0.3246	0.3246	0.3246	0.3246	0.3246	0.3246	0.3246	0.3246	0.3246	0.3246	0.3246	0.3246	0.3246	0.3246	0.3246	0.3246	0.3246	0.3246	0.3246	0.3246	0.3246	0.3246	0.3246	0.3246	0.3246	0.3246	0.3246	0.3246	0.3246	0.3246	0.3246	0.3246	0.3246	0.3246	0.3246	0.3246	0.3246	0.3246	0.3246	0.3246	0.3246	0.3246	0.3246	0.3246	0.3246	0.3246	0.3246	0.3246	0.3246
138	0.32458	0.32458	0.32458	0.32458	0.32458	0.32458	0.32458	0.32458	0.32458	0.32458	0.32458	0.32458	0.32458	0.32458	0.32458	0.32458	0.32458	0.32458	0.32458	0.32458	0.32458	0.32458	0.32458	0.32458	0.32458	0.32458	0.32458	0.32458	0.32458	0.32458	0.32458	0.32458	0.32458	0.32458	0.32458	0.32458	0.32458	0.32458	0.32458	0.32458	0.32458	0.32458	0.32458	0.32458	0.32458	0.32458	0.32458	0.32458	0.32458
139	0.32456	0.32456	0.32456	0.32456	0.32456	0.32456	0.32456	0.32456	0.32456	0.32456	0.32456	0.32456	0.32456	0.32456	0.32456	0.32456	0.32456	0.32456	0.32456	0.32456	0.32456	0.32456	0.32456	0.32456	0.32456	0.32456	0.32456	0.32456	0.32456	0.32456	0.32456	0.32456	0.32456	0.32456	0.32456	0.32456	0.32456	0.32456	0.32456	0.32456	0.32456	0.32456	0.32456	0.32456	0.32456	0.32456	0.32456	0.32456	0.32456
140	0.32455	0.32455	0.32455	0.32455	0.32455	0.32455	0.32455	0.32455	0.32455	0.32455	0.32455	0.32455	0.32455	0.32455	0.32455	0.32455	0.32455	0.32455	0.32455	0.32455	0.32455	0.32455	0.32455	0.32455	0.32455	0.32455	0.32455	0.32455	0.32455	0.32455	0.32455	0.32455	0.32455	0.32455	0.32455	0.32455	0.32455	0.32455	0.32455	0.32455	0.32455	0.32455	0.32455	0.32455	0.32455	0.32455	0.32455	0.32455	0.32455
141	0.32453	0.32453	0.32453	0.32453	0.32453	0.32453	0.32453	0.32453	0.32453	0.32453	0.32453	0.32453	0.32453	0.32453	0.32453	0.32453	0.32453	0.32453	0.32453	0.32453	0.32453	0.32453	0.32453	0.32453	0.32453	0.32453	0.32453	0.32453	0.32453	0.32453	0.32453	0.32453	0.32453	0.32453	0.32453	0.32453	0.32453	0.32453	0.32453	0.32453	0.32453	0.32453	0.32453	0.32453	0.32453	0.32453	0.32453	0.32453	0.32453
142	0.32452	0.32452	0.32452	0.32452	0.32452	0.32452	0.32452	0.32452	0.32452	0.32452	0.32452	0.32452	0.32452	0.32452	0.32452	0.32452	0.32452	0.32452	0.32452	0.32452	0.32452	0.32452	0.32452	0.32452	0.32452	0.32452	0.32452	0.32452	0.32452	0.32452	0.32452	0.32452	0.32452	0.32452	0.32452	0.32452	0.32452	0.32452	0.32452	0.32452	0.32452	0.32452	0.32452	0.32452	0.32452	0.32452	0.32452	0.32452	0.32452
143	0.32451	0.32451	0.32451	0.32451	0.32451	0.32451	0.32451	0.32451	0.32451	0.32451	0.32451	0.32451	0.32451	0.32451	0.32451	0.32451	0.32451	0.32451	0.32451	0.32451	0.32451	0.32451	0.32451	0.32451	0.32451	0.32451	0.32451	0.32451	0.32451	0.32451	0.32451	0.32451	0.32451	0.32451	0.32451	0.32451	0.32451	0.32451	0.32451	0.32451	0.32451	0.32451	0.32451	0.32451	0.32451	0.32451	0.32451	0.32451	0.32451
144	0.3245	0.3245	0.3245	0.3245	0.3245	0.3245	0.3245	0.3245	0.3245	0.3245	0.3245	0.3245	0.3245	0.3245	0.3245	0.3245	0.3245	0.3245	0.3245	0.3245	0.3245	0.3245	0.3245	0.3245	0.3245	0.3245	0.3245	0.3245	0.3245	0.3245	0.3245	0.3245	0.3245	0.3245	0.3245	0.3245	0.3245	0.3245	0.3245	0.3245	0.3245	0.3245	0.3245	0.3245	0.3245	0.3245	0.3245	0.3245	0.3245
145	0.32449	0.32449	0.32449	0.32449	0.32449	0.32449	0.32449	0.32449	0.32449	0.32449	0.32449	0.32449	0.32449	0.32449	0.32449	0.32449	0.32449	0.32449	0.32449	0.32449	0.32449	0.32449	0.32449	0.32449	0.32449	0.32449	0.32449	0.32449	0.32449	0.32449	0.32449	0.32449	0.32449	0.32449	0.32449	0.32449	0.32449	0.32449	0.32449	0.32449	0.32449	0.32449	0.32449	0.32449	0.32449	0.32449	0.32449	0.32449	0.32449
146	0.32449	0.32449	0.32449	0.32449	0.32449	0.32449	0.32449	0.32449	0.32449	0.32449	0.32449	0.32449	0.32449	0.32449	0.32449	0.32449	0.32449	0.32449	0.32449	0.32449	0.32449	0.32449	0.32449	0.32449	0.32449	0.32449	0.32449	0.32449	0.32449	0.32449	0.32449	0.32449	0.32449	0.32449	0.32449	0.32449	0.32449	0.32449	0.32449	0.32449	0.32449	0.32449	0.32449	0.32449	0.32449	0.32449	0.32449	0.32449	0.32449
147	0.32448	0.32448	0.32448	0.32448	0.32448	0.32448	0.32448	0.32448	0.32448	0.32448	0.32448	0.32448	0.32448	0.32448	0.32448	0.32448	0.32448	0.32448	0.32448	0.32448	0.32448	0.32448	0.32448	0.32448	0.32448	0.32448	0.32448	0.32448	0.32448	0.32448	0.32448	0.32448	0.32448	0.32448	0.32448	0.32448	0.32448	0.32448	0.32448	0.32448	0.32448	0.32448	0.32448	0.32448	0.32448	0.32448	0.32448	0.32448	0.32448
148	0.32448	0.32448	0.32448	0.32448	0.32448	0.32448	0.32448	0.32448	0.32448	0.32448	0.32448	0.32448	0.32448	0.32448	0.32448	0.32448	0.32448	0.32448	0.32448	0.32448	0.32448	0.32448	0.32448	0.32448	0.32448	0.32448	0.32448	0.32448	0.32448	0.32448	0.32448	0.32448	0.32448	0.32448	0.32448	0.32448	0.32448	0.32448	0.32448	0.32448	0.32448	0.32448	0.32448	0.32448	0.32448	0.32448	0.32448	0.32448	0.32448
149	0.32448	0.32448	0.32448	0.32448	0.32448	0.32448	0.32448	0.32448	0.32448	0.32448	0.32448	0.32448	0.32448	0.32448	0.32448	0.32448	0.32448	0.32448	0.32448	0.32448	0.32448	0.32448	0.32448	0.32448	0.32448	0.32448	0.32448	0.32448	0.32448	0.32448	0.32448	0.32448	0.32448	0.32448	0.32448	0.32448	0.32448	0.32448	0.32448	0.32448	0.32448	0.32448	0.32448	0.32448	0.32448	0.32448	0.32448	0.32448	0.32448
150	0.32449	0.32449	0.32449	0.32449	0.32449	0.32449	0.32449	0.32449	0.32449	0.32449	0.32449	0.32449	0.32449	0.32449	0.32449	0.32449	0.32449	0.32449	0.32449	0.32449	0.32449	0.32449	0.32449	0.32449	0.32449	0.32449	0.32449	0.32449	0.32449	0.32449	0.32449	0.32449	0.32449	0.32449	0.32449	0.32449	0.32449	0.32449	0.32449	0.32449	0.32449	0.32449	0.32449	0.32449	0.32449	0.32449	0.32449	0.32449	0.32449
151	0.32449	0.32449	0.32449	0.32449	0.32449	0.32449	0.32449	0.32449	0.32449	0.32449	0.32449	0.32449	0.32449	0.32449	0.32449	0.32449	0.32449	0.32449	0.32449	0.32449	0.32449	0.32449	0.32449	0.32449	0.32449	0.32449	0.32449	0.32449	0.32449	0.32449	0.32449	0.32449	0.32449	0.32449	0.32449	0.32449	0.32449	0.32449	0.32449	0.32449	0.32449	0.32449	0.32449	0.32449	0.32449	0.32449	0.32449	0.32449	0.32449
152	0.32449	0.32449	0.32449	0.32449	0.32449	0.32449	0.32449	0.32449	0.32449	0.32449	0.32449	0.32449	0.32449	0.32449	0.32449	0.32449	0.32449	0.32449	0.32449	0.32449	0.32449	0.32449	0.32449	0.32449	0.32449	0.32449	0.32449	0.32449	0.32449	0.32449	0.32449	0.32449	0.32449	0.32449	0.32449	0.32449	0.32449	0.32449	0.32449	0.32449	0.32449	0.32449	0.32449	0.32449	0.32449	0.32449	0.32449	0.32449	0.32449
153	0.3245	0.3245	0.3245	0.3245	0.3245	0.3245	0.3245	0.3245	0.3245	0.3245	0.3245	0.3245	0.3245	0.3245	0.3245	0.3245	0.3245	0.3245	0.3245	0.3245	0.3245	0.3245	0.3245	0.3245	0.3245	0.3245	0.3245	0.3245	0.3245	0.3245	0.3245	0.3245	0.3245	0.3245	0.3245	0.3245	0.3245	0.3245	0.3245	0.3245	0.3245	0.3245	0.3245	0.3245	0.3245	0.3245	0.3245	0.3245	0.3245
154	0.3245	0.3245	0.3245	0.3245	0.3245	0.3245	0.3245	0.3245	0.3245	0.3245	0.3245	0.3245	0.3245	0.3245	0.3245	0.3245	0.3245	0.3245	0.3245	0.3245	0.3245	0.3245	0.3245	0.3245	0.3245	0.3245	0.3245	0.3245	0.3245	0.3245	0.3245	0.3245	0.3245	0.3245	0.3245	0.3245	0.3245	0.3245	0.3245	0.3245	0.3245	0.3245	0.3245	0.3245	0.3245	0.3245	0.3245	0.3245	0.3245
155	0.32451	0.32451	0.32451	0.32451	0.32451	0.32451	0.32451	0.32451	0.32451	0.32451	0.32451	0.32451	0.32451	0.32451	0.32451	0.32451	0.32451	0.32451	0.32451	0.32451	0.32451	0.32451	0.32451	0.32451	0.32451	0.32451	0.32451	0.32451	0.32451	0.32451	0.32451	0.32451	0.32451	0.32451	0.32451	0.32451	0.32451	0.32451	0.32451	0.32451	0.32451	0.32451	0.32451	0.32451	0.32451	0.32451	0.32451	0.32451	0.32451
156	0.32451	0.32451	0.32451	0.32451	0.32451	0.32451	0.32451	0.32451	0.32451	0.32451	0.32451	0.32451	0.32451	0.32451	0.32451	0.32451	0.32451	0.32451	0.32451	0.32451	0.32451	0.32451	0.32451	0.32451	0.32451	0.32451	0.32451	0.32451	0.32451	0.32451	0.32451	0.32451	0.32451	0.32451	0.32451	0.32451	0.32451	0.32451	0.32451	0.32451	0.32451	0.32451	0.32451	0.32451	0.32451	0.32451	0.32451	0.32451	0.32451
157	0.32452	0.32452	0.32452	0.32452	0.32452	0.32452	0.32452	0.32452	0.32452	0.32452	0.32452	0.32452	0.32452	0.32452	0.32452	0.32452	0.32452	0.32452	0.32452	0.32452	0.32452	0.32452	0.32452	0.32452	0.32452	0.32452	0.32452	0.32452	0.32452	0.32452	0.32452	0.32452	0.32452	0.32452	0.32452	0.32452	0.32452	0.32452	0.32452	0.32452	0.32452	0.32452	0.32452	0.32452	0.32452	0.32452	0.32452	0.32452	0.32452
158	0.32453	0.32453	0.32453	0.32453	0.32453	0.32453	0.32453	0.32453	0.32453	0.32453	0.32453	0.32453	0.32453	0.32453	0.32453	0.32453	0.32453	0.32453	0.32453	0.32453	0.32453	0.32453	0.32453	0.32453	0.32453	0.32453	0.32453	0.32453	0.32453	0.32453	0.32453	0.32453	0.32453	0.32453	0.32453	0.32453	0.32453	0.32453	0.32453	0.32453	0.32453	0.32453	0.32453	0.32453	0.32453	0.32453	0.32453	0.32453	0.32453
159	0.32453	0.32453	0.32453	0.32453	0.32453	0.32453	0.32453	0.32453	0.32453	0.32453	0.32453	0.32453	0.32453	0.32453	0.32453	0.32453	0.32453	0.32453	0.32453	0.32453	0.32453	0.32453	0.32453	0.32453	0.32453	0.32453	0.32453	0.32453	0.32453	0.32453	0.32453	0.32453	0.32453	0.32453	0.32453	0.32453	0.32453	0.32453	0.32453	0.32453	0.32453	0.32453	0.32453	0.32453	0.32453	0.32453	0.32453	0.32453	0.32453
160	0.32454	0.32454	0.32454	0.32454	0.32454	0.32454	0.32454	0.32454	0.32454	0.32454	0.32454	0.32454	0.32454	0.32454	0.32454	0.32454	0.32454	0.32454	0.32454	0.32454	0.32454	0.32454	0.32454	0.32454	0.32454	0.32454	0.32454	0.32454	0.32454	0.32454	0.32454	0.32454	0.32454	0.32454	0.32454	0.32454	0.32454	0.32454	0.32454	0.32454	0.32454	0.32454	0.32454	0.32454	0.32454	0.32454	0.32454	0.32454	0.32454
161	0.32455	0.32455	0.32455	0.32455	0.32455	0.32455	0.32455	0.32455	0.32455	0.32455	0.32455	0.32455	0.32455	0.32455	0.32455	0.32455	0.32455	0.32455	0.32455	0.32455	0.32455	0.32455	0.32455	0.32455	0.32455	0.32455	0.32455	0.32455	0.32455	0.32455	0.32455	0.32455	0.32455	0.32455	0.32455	0.32455	0.32455	0.32455	0.32455	0.32455	0.32455	0.32455	0.32455	0.32455	0.32455	0.32455	0.32455	0.32455	0.32455
162	0.32455	0.32455	0.32455	0.32455	0.32455	0.32455	0.32455	0.32455	0.32455	0.32455	0.32455	0.32455	0.32455	0.32455	0.32455	0.32455	0.32455	0.32455	0.32455	0.32455	0.32455	0.32455	0.32455	0.32455	0.32455	0.32455	0.32455	0.32455	0.32455	0.32455	0.32455	0.32455	0.32455	0.32455	0.32455	0.32455	0.32455	0.32455	0.32455	0.32455	0.32455	0.32455	0.32455	0.32455	0.32455	0.32455	0.32455	0.32455	0.32455
163	0.32456	0.32456	0.32456	0.32456	0.32456	0.32456	0.32456	0.32456	0.32456	0.32456	0.32456	0.32456	0.32456	0.32456	0.32456	0.32456	0.32456	0.32456	0.32456	0.32456	0.32456	0.32456	0.32456	0.32456	0.32456	0.32456	0.32456	0.32456	0.32456	0.32456	0.32456	0.32456	0.32456	0.32456	0.32456	0.32456	0.32456	0.32456	0.32456	0.32456	0.32456	0.32456	0.32456	0.32456	0.32456	0.32456	0.32456	0.32456	0.32456
164	0.32456	0.32456	0.32456	0.32456	0.32456	0.32456	0.32456	0.32456	0.32456	0.32456	0.32456	0.32456	0.32456	0.32456	0.32456	0.32456	0.32456	0.32456	0.32456	0.32456	0.32456	0.32456	0.32456	0.32456	0.32456	0.32456	0.32456	0.32456	0.32456	0.32456	0.32456	0.32456	0.32456	0.32456	0.32456	0.32456	0.32456	0.32456	0.32456	0.32456	0.32456	0.32456	0.32456	0.32456	0.32456	0.32456	0.32456	0.32456	0.32456
165	0.32457	0.32457	0.32457	0.32457	0.32457	0.32457	0.32457	0.32457	0.32457	0.32457	0.32457	0.32457	0.32457	0.32457	0.32457	0.32457	0.32457	0.32457	0.32457	0.32457	0.32457	0.32457	0.32457	0.32457	0.32457	0.32457	0.32457	0.32457	0.32457	0.32457	0.32457	0.32457	0.32457	0.32457	0.32457	0.32457	0.32457	0.32457	0.32457	0.32457	0.32457	0.32457	0.32457	0.32457	0.32457	0.32457	0.32457	0.32457	0.32457
166	0.32457	0.32457	0.32457	0.32457	0.32457	0.32457	0.32457	0.32457	0.32457	0.32457	0.32457	0.32457	0.32457	0.32457	0.32457	0.32457	0.32457	0.32457	0.32457	0.32457	0.32457	0.32457	0.32457	0.32457	0.32457	0.32457	0.32457	0.32457	0.32457	0.32457	0.32457	0.32457	0.32457	0.32457	0.32457	0.32457	0.32457	0.32457	0.32457	0.32457	0.32457	0.32457	0.32457	0.32457	0.32457	0.32457	0.32457	0.32457	0.32457
167	0.32457	0.32457	0.32457	0.32457	0.32457	0.32457	0.32457	0.32457	0.32457	0.32457	0.32457	0.32457	0.32457	0.32457	0.32457	0.32457	0.32457	0.32457	0.32457	0.32457	0.32457	0.32457	0.32457	0.32457	0.32457	0.32457	0.32457	0.32457	0.32457	0.32457	0.32457	0.32457	0.32457	0.32457	0.32457	0.32457	0.32457	0.32457	0.32457	0.32457	0.32457	0.32457	0.32457	0.32457	0.32457	0.32457	0.32457	0.32457	0.32457
168	0.32458	0.32458	0.32458	0.32458	0.32458	0.32458	0.32458	0.32458	0.32458	0.32458	0.32458	0.32458	0.32458	0.32458	0.32458	0.32458	0.32458	0.32458	0.32458	0.32458	0.32458	0.32458	0.32458	0.32458	0.32458	0.32458	0.32458	0.32458	0.32458	0.32458	0.32458	0.32458	0.32458	0.32458	0.32458	0.32458	0.32458	0.32458	0.32458	0.32458	0.32458	0.32458	0.32458	0.32458	0.32458	0.32458	0.32458	0.32458	0.32458
169	0.32458	0.32458	0.32458	0.32458	0.32458	0.32458	0.32458	0.32458	0.32458	0.32458	0.32458	0.32458	0.32458	0.32458	0.32458	0.32458	0.32458	0.32458	0.32458	0.32458	0.32458	0.32458	0.32458	0.32458	0.32458	0.32458	0.32458	0.32458	0.32458	0.32458	0.32458	0.32458	0.32458	0.32458	0.32458	0.32458	0.32458	0.32458	0.32458	0.32458	0.32458	0.32458	0.32458	0.32458	0.32458	0.32458	0.32458	0.32458	0.32458
170	0.32458	0.32458	0.32458	0.32458	0.32458	0.32458	0.32458	0.32458	0.32458	0.32458	0.32458	0.32458	0.32458	0.32458	0.32458	0.32458	0.32458	0.32458	0.32458	0.32458	0.32458	0.32458	0.32458	0.32458	0.32458	0.32458	0.32458	0.32458	0.32458	0.32458	0.32458	0.32458	0.32458	0.32458	0.32458	0.32458	0.32458	0.32458	0.32458	0.32458	0.32458	0.32458	0.32458	0.32458	0.32458	0.32458	0.32458	0.32458	0.32458
171	0.32458	0.32458	0.32458	0.32458	0.32458	0.32458	0.32458	0.32458	0.32458	0.32458	0.32458	0.32458	0.32458	0.32458	0.32458	0.32458	0.32458	0.32458	0.32458	0.32458	0.32458	0.32458	0.32458	0.32458	0.32458	0.32458	0.32458	0.32458	0.32458	0.32458	0.32458	0.32458	0.32458	0.32458	0.32458	0.32458	0.32458	0.32458	0.32458	0.32458	0.32458	0.32458	0.32458	0.32458	0.32458	0.32458	0.32458	0.32458	0.32458
172	0.32458	0.32458	0.32458	0.32458	0.32458	0.32458	0.32458	0.32458	0.32458	0.32458	0.32458	0.32458	0.32458	0.32458	0.32458	0.32458	0.32458	0.32458	0.32458	0.32458	0.32458	0.32458	0.32458	0.32458	0.32458	0.32458	0.32458	0.32458	0.32458	0.32458	0.32458	0.32458	0.32458	0.32458	0.32458	0.32458	0.32458	0.32458	0.32458	0.32458	0.32458	0.32458	0.32458	0.32458	0.32458	0.32458	0.32458	0.32458	0.32458
173	0.32458	0.32458	0.32458	0.32458	0.32458	0.32458	0.32458	0.32458	0.32458	0.32458	0.32458	0.32458	0.32458	0.32458	0.32458	0.32458	0.32458	0.32458	0.32458	0.32458	0.32458	0.32458	0.32458	0.32458	0.32458	0.32458	0.32458	0.32458	0.32458	0.32458	0.32458	0.32458	0.32458	0.32458	0.32458	0.32458	0.32458	0.32458	0.32458	0.32458	0.32458	0.32458	0.32458	0.32458	0.32458	0.32458	0.32458	0.32458	0.32458
174	0.32458	0.32458	0.32458	0.32458	0.32458	0.32458	0.32458	0.32458	0.32458	0.32458	0.32458	0.32458	0.32458	0.32458	0.32458	0.32458	0.32458	0.32458	0.32458	0.32458	0.32458	0.32458	0.32458	0.32458	0.32458	0.32458	0.32458	0.32458	0.32458	0.32458	0.32458	0.32458	0.32458	0.32458	0.32458	0.32458	0.32458	0.32458	0.32458	0.32458	0.32458	0.32458	0.32458	0.32458	0.32458	0.32458	0.32458	0.32458	0.32458
175	0.32458	0.32458	0.32458	0.32458	0.32458	0.32458	0.32458	0.32458	0.32458	0.32458	0.32458	0.32458	0.32458	0.32458	0.32458	0.32458	0.32458	0.32458	0.32458	0.32458	0.32458	0.32458	0.32458	0.32458	0.32458	0.32458	0.32458	0.32458	0.32458	0.32458	0.32458	0.32458	0.32458	0.32458	0.32458	0.32458	0.32458	0.32458	0.32458	0.32458	0.32458	0.32458	0.32458	0.32458	0.32458	0.32458	0.32458	0.32458	0.32458
176	0.32458	0.32458	0.32458	0.32458	0.32458	0.32458	0.32458	0.32458	0.32458	0.32458	0.32458	0.32458	0.32458	0.32458	0.32458	0.32458	0.32458	0.32458	0.32458	0.32458	0.32458	0.32458	0.32458	0.32458	0.32458	0.32458	0.32458	0.32458	0.32458	0.32458	0.32458	0.32458	0.32458	0.32458	0.32458	0.32458	0.32458	0.32458	0.32458	0.32458	0.32458	0.32458	0.32458	0.32458	0.32458	0.32458	0.32458	0.32458	0.32458
177	0.32457	0.32457	0.32457	0.32457	0.32457	0.32457	0.32457	0.32457	0.32457	0.32457	0.32457	0.32457	0.32457	0.32457	0.32457	0.32457	0.32457	0.32457	0.32457	0.32457	0.32457	0.32457	0.32457	0.32457	0.32457	0.32457	0.32457	0.32457	0.32457	0.32457	0.32457	0.32457	0.32457	0.32457	0.32457	0.32457	0.32457	0.32457	0.32457	0.32457	0.32457	0.32457	0.32457	0.32457	0.32457	0.32457	0.32457	0.32457	0.32457
178	0.32457	0.32457	0.32457	0.32457	0.32457	0.32457	0.32457	0.32457	0.32457	0.32457	0.32457	0.32457	0.32457	0.32457	0.32457	0.32457	0.32457	0.32457	0.32457	0.32457	0.32457	0.32457	0.32457	0.32457	0.32457	0.32457	0.32457	0.32457	0.32457	0.32457	0.32457	0.32457	0.32457	0.32457	0.32457	0.32457	0.32457	0.32457	0.32457	0.32457	0.32457	0.32457	0.32457	0.32457	0.32457	0.32457	0.32457	0.32457	0.32457
179	0.32457	0.32457	0.32457	0.32457	0.32457	0.32457	0.32457	0.32457	0.32457	0.32457	0.32457	0.32457	0.32457	0.32457	0.32457	0.32457	0.32457	0.32457	0.32457	0.32457	0.32457	0.32457	0.32457	0.32457	0.32457	0.32457	0.32457	0.32457	0.32457	0.32457	0.32457	0.32457	0.32457	0.32457	0.32457	0.32457	0.32457	0.32457	0.32457	0.32457	0.32457	0.32457	0.32457	0.32457	0.32457	0.32457	0.32457	0.32457	0.32457
180	0.32457	0.32457	0.32457	0.32457	0.32457	0.32457	0.32457	0.32457	0.32457	0.32457	0.32457	0.32457	0.32457	0.32457	0.32457	0.32457	0.32457	0.32457	0.32457	0.32457	0.32457	0.32457	0.32457	0.32457	0.32457	0.32457	0.32457	0.32457	0.32457	0.32457	0.32457	0.32457	0.32457	0.32457	0.32457	0.32457	0.32457	0.32457	0.32457	0.32457	0.32457	0.32457	0.32457	0.32457	0.32457	0.32457	0.32457	0.32457	0.32457
181	0.32456	0.32456	0.32456	0.32456	0.32456	0.32456	0.32456	0.32456	0.32456	0.32456	0.32456	0.32456	0.32456	0.32456	0.32456	0.32456	0.32456	0.32456	0.32456	0.32456	0.32456	0.32456	0.32456	0.32456	0.32456	0.32456	0.32456	0.32456	0.32456	0.32456	0.32456	0.32456	0.32456	0.32456	0.32456	0.32456	0.32456	0.32456	0.32456	0.32456	0.32456	0.32456	0.32456	0.32456	0.32456	0.32456	0.32456	0.32456	0.32456
182	0.32456	0.32456	0.32456	0.32456	0.32456	0.32456	0.32456	0.32456	0.32456	0.32456	0.32456	0.32456	0.32456	0.32456	0.32456	0.32456	0.32456	0.32456	0.32456	0.32456	0.32456	0.32456	0.32456	0.32456	0.32456	0.32456	0.32456	0.32456	0.32456	0.32456	0.32456	0.32456	0.32456	0.32456	0.32456	0.32456	0.32456	0.32456	0.32456	0.32456	0.32456	0.32456	0.32456	0.32456	0.32456	0.32456	0.32456	0.32456	0.32456
183	0.32456	0.32456	0.32456	0.32456	0.32456	0.32456	0.32456	0.32456	0.32456	0.32456	0.32456	0.32456	0.32456	0.32456	0.32456	0.32456	0.32456	0.32456	0.32456	0.32456	0.32456	0.32456	0.32456	0.32456	0.32456	0.32456	0.32456	0.32456	0.32456	0.32456	0.32456	0.32456	0.32456	0.32456	0.32456	0.32456	0.32456	0.32456	0.32456	0.32456	0.32456	0.32456	0.32456	0.32456	0.32456	0.32456	0.32456	0.32456	0.32456
184	0.32455	0.32455	0.32455	0.32455	0.32455	0.32455	0.32455	0.32455	0.32455	0.32455	0.32455	0.32455	0.32455	0.32455	0.32455	0.32455	0.32455	0.32455	0.32455	0.32455	0.32455	0.32455	0.32455	0.32455	0.32455	0.32455	0.32455	0.32455	0.32455	0.32455	0.32455	0.32455	0.32455	0.32455	0.32455	0.32455	0.32455	0.32455	0.32455	0.32455	0.32455	0.32455	0.32455	0.32455	0.32455	0.32455	0.32455	0.32455	0.32455
185	0.32455	0.32455	0.32455	0.32455	0.32455	0.32455	0.32455	0.32455	0.32455	0.32455	0.32455	0.32455	0.32455	0.32455	0.32455	0.32455	0.32455	0.32455	0.32455	0.32455	0.32455	0.32455	0.32455	0.32455	0.32455	0.32455	0.32455	0.32455	0.32455	0.32455	0.32455	0.32455	0.32455	0.32455	0.32455	0.32455	0.32455	0.32455	0.32455	0.32455	0.32455	0.32455	0.32455	0.32455	0.32455	0.32455	0.32455	0.32455	0.32455
186	0.32455	0.32455	0.32455	0.32455	0.32455	0.32455	0.32455	0.32455	0.32455	0.32455	0.32455	0.32455	0.32455	0.32455	0.32455	0.32455	0.32455	0.32455	0.32455	0.32455	0.32455	0.32455	0.32455	0.32455	0.32455	0.32455	0.32455	0.32455	0.32455	0.32455	0.32455	0.32455	0.32455	0.32455	0.32455	0.32455	0.32455	0.32455	0.32455	0.32455	0.32455	0.32455	0.32455	0.32455	0.32455	0.32455	0.32455	0.32455	0.32455
187	0.32454	0.32454	0.32454	0.32454	0.32454	0.32454	0.32454	0.32454	0.32454	0.32454	0.32454	0.32454	0.32454	0.32454	0.32454	0.32454	0.32454	0.32454	0.32454	0.32454	0.32454	0.32454	0.32454	0.32454	0.32454	0.32454	0.32454	0.32454	0.32454	0.32454	0.32454	0.32454	0.32454	0.32454	0.32454	0.32454	0.32454	0.32454	0.32454	0.32454	0.32454	0.32454	0.32454	0.32454	0.32454	0.32454	0.32454	0.32454	0.32454
188	0.32454	0.32454	0.32454	0.32454	0.32454	0.32454	0.32454	0.32454	0.32454	0.32454	0.32454	0.32454	0.32454	0.32454	0.32454	0.32454	0.32454	0.32454	0.32454	0.32454	0.32454	0.32454	0.32454	0.32454	0.32454	0.32454	0.32454	0.32454	0.32454	0.32454	0.32454	0.32454	0.32454	0.32454	0.32454	0.32454	0.32454	0.32454	0.32454	0.32454	0.32454	0.32454	0.32454	0.32454	0.32454	0.32454	0.32454	0.32454	0.32454
189	0.32454	0.32454	0.32454	0.32454	0.32454	0.32454	0.32454	0.32454	0.32454	0.32454	0.32454	0.32454	0.32454	0.32454	0.32454	0.32454	0.32454	0.32454	0.32454	0.32454	0.32454	0.32454	0.32454	0.32454	0.32454	0.32454	0.32454	0.32454	0.32454	0.32454	0.32454	0.32454	0.32454	0.32454	0.32454	0.32454	0.32454	0.32454	0.32454	0.32454	0.32454	0.32454	0.32454	0.32454	0.32454	0.32454	0.32454	0.32454	0.32454
190	0.32454	0.32454	0.32454	0.32454	0.32454	0.32454	0.32454	0.32454	0.32454	0.32454	0.32454	0.32454	0.32454	0.32454	0.32454	0.32454	0.32454	0.32454	0.32454	0.32454	0.32454	0.32454	0.32454	0.32454	0.32454	0.32454	0.32454	0.32454	0.32454	0.32454	0.32454	0.32454	0.32454	0.32454	0.32454	0.32454	0.32454	0.32454	0.32454	0.32454	0.32454	0.32454	0.32454	0.32454	0.32454	0.32454	0.32454	0.32454	0.32454
191	0.32453	0.32453	0.32453	0.32453	0.32453	0.32453	0.32453	0.32453	0.32453	0.32453	0.32453	0.32453	0.32453	0.32453	0.32453	0.32453	0.32453	0.32453	0.32453	0.32453	0.32453	0.32453	0.32453	0.32453	0.32453	0.32453	0.32453	0.32453	0.32453	0.32453	0.32453	0.32453	0.32453	0.32453	0.32453	0.32453	0.32453	0.32453	0.32453	0.32453	0.32453	0.32453	0.32453	0.32453	0.32453	0.32453	0.32453	0.32453	0.32453
192	0.32453	0.32453	0.32453	0.32453	0.32453	0.32453	0.32453	0.32453	0.32453	0.32453	0.32453	0.32453	0.32453	0.32453	0.32453	0.32453	0.32453	0.32453	0.32453	0.32453	0.32453	0.32453	0.32453	0.32453	0.32453	0.32453	0.32453	0.32453	0.32453	0.32453	0.32453	0.32453	0.32453	0.32453	0.32453	0.32453	0.32453	0.32453	0.32453	0.32453	0.32453	0.32453	0.32453	0.32453	0.32453	0.32453	0.32453	0.32453	0.32453
193	0.32453	0.32453	0.32453	0.32453	0.32453	0.32453	0.32453	0.32453	0.32453	0.32453	0.32453	0.32453	0.32453	0.32453	0.32453	0.32453	0.32453	0.32453	0.32453	0.32453	0.32453	0.32453	0.32453	0.32453	0.32453	0.32453	0.32453	0.32453	0.32453	0.32453	0.32453	0.32453	0.32453	0.32453	0.32453	0.32453	0.32453	0.32453	0.32453	0.32453	0.32453	0.32453	0.32453	0.32453	0.32453	0.32453	0.32453	0.32453	0.32453
194	0.32453	0.32453	0.32453	0.32453	0.32453	0.32453	0.32453	0.32453	0.32453	0.32453	0.32453	0.32453	0.32453	0.32453	0.32453	0.32453	0.32453	0.32453	0.32453	0.32453	0.32453	0.32453	0.32453	0.32453	0.32453	0.32453	0.32453	0.32453	0.32453	0.32453	0.32453	0.32453	0.32453	0.32453	0.32453	0.32453	0.32453	0.32453	0.32453	0.32453	0.32453	0.32453	0.32453	0.32453	0.32453	0.32453	0.32453	0.32453	0.32453
195	0.32454	0.32454	0.32454	0.32454	0.32454	0.32454	0.32454	0.32454	0.32454	0.32454	0.32454	0.32454	0.32454	0.32454	0.32454	0.32454	0.32454	0.32454	0.32454	0.32454	0.32454	0.32454	0.32454	0.32454	0.32454	0.32454	0.32454	0.32454	0.32454	0.32454	0.32454	0.32454	0.32454	0.32454	0.32454	0.32454	0.32454	0.32454	0.32454	0.32454	0.32454	0.32454	0.32454	0.32454	0.32454	0.32454	0.32454	0.32454	0.32454
196	0.32454	0.32454	0.32454	0.32454	0.32454	0.32454	0.32454	0.32454	0.32454	0.32454	0.32454	0.32454	0.32454	0.32454	0.32454	0.32454	0.32454	0.32454	0.32454	0.32454	0.32454	0.32454	0.32454	0.32454	0.32454	0.32454	0.32454	0.32454	0.32454	0.32454	0.32454	0.32454	0.32454	0.32454	0.32454	0.32454	0.32454	0.32454	0.32454	0.32454	0.32454	0.32454	0.32454	0.32454	0.32454	0.32454	0.32454	0.32454	0.32454
197	0.32454	0.32454	0.32454	0.32454	0.32454	0.32454	0.32454	0.32454	0.32454	0.32454	0.32454	0.32454	0.32454	0.32454	0.32454	0.32454	0.32454	0.32454	0.32454	0.32454	0.32454	0.32454	0.32454	0.32454	0.32454	0.32454	0.32454	0.32454	0.32454	0.32454	0.32454	0.32454	0.32454	0.32454	0.32454	0.32454	0.32454	0.32454	0.32454	0.32454	0.32454	0.32454	0.32454	0.32454	0.32454	0.32454	0.32454	0.32454	0.32454
198	0.32454	0.32454	0.32454	0.32454	0.32454	0.32454	0.32454	0.32454	0.32454	0.32454	0.32454	0.32454	0.32454	0.32454	0.32454	0.32454	0.32454	0.32454	0.32454	0.32454	0.32454	0.32454	0.32454	0.32454	0.32454	0.32454	0.32454	0.32454	0.32454	0.32454	0.32454	0.32454	0.32454	0.32454	0.32454	0.32454	0.32454	0.32454	0.32454	0.32454	0.32454	0.32454	0.32454	0.32454	0.32454	0.32454	0.32454	0.32454	0.32454
199	0.32454	0.32454	0.32454	0.32454	0.32454	0.32454	0.32454	0.32454	0.32454	0.32454	0.32454	0.32454	0.32454	0.32454	0.32454	0.32454	0.32454	0.32454	0.32454	0.32454	0.32454	0.32454	0.32454	0.32454	0.32454	0.32454	0.32454	0.32454	0.32454	0.32454	0.32454	0.32454	0.32454	0.32454	0.32454	0.32454	0.32454	0.32454	0.32454	0.32454	0.32454	0.32454	0.32454	0.32454	0.32454	0.32454	0.32454	0.32454	0.32454
200	0.32455	0.32455	0.32455	0.32455	0.32455	0.32455	0.32455	0.32455	0.32455	0.32455	0.32455	0.32455	0.32455	0.32455	0.32455	0.32455	0.32455	0.32455	0.32455	0.32455	0.32455	0.32455	0.32455	0.32455	0.32455	0.32455	0.32455	0.32455	0.32455	0.32455	0.32455	0.32455	0.32455	0.32455	0.32455	0.32455	0.32455	0.32455	0.32455	0.32455	0.32455	0.32455	0.32455	0.32455	0.32455	0.32455	0.32455	0.32455	0.32455
201	0.32815	0.32864	0.32857	0.32824	0.3279	0.32899	0.32876	0.32864	0.32791	0.3289	0.32888	0.32789	0.3288	0.32869	0.32894	0.32947	0.32901	0.33014	0.32938	0.32857	0.32999	0.32941	0.32989	0.32901	0.32934	0.32846	0.33089	0.33082	0.33061	0.33096	0.32931	0.33081	0.32969	0.32913	0.32935	0.32924	0.32897	0.32962	0.3306	0.33082	0.33001	0.3303	0.3304	0.33	0.33288	0.33026	0.33088	0.33091	0.32973
202	0.34366	0.34606	0.34568	0.34421	0.34262	0.34704	0.34644	0.34589	0.34225	0.34725	0.347	0.34232	0.34668	0.34697	0.34848	0.35015	0.34801	0.35423	0.35018	0.346	0.35316	0.35091	0.35287	0.34839	0.34976	0.34579	0.35882	0.35822	0.35708	0.36033	0.35035	0.35865	0.35176	0.34901	0.34971	0.34936	0.34799	0.3515	0.35648	0.35915	0.35405	0.35527	0.35702	0.35368	0.36811	0.35566	0.3589	0.35904	0.35308
203	0.37012	0.37572	0.37493	0.37152	0.36787	0.37746	0.37646	0.37496	0.36652	0.37854	0.37775	0.36685	0.37705	0.37906	0.38301	0.38564	0.38064	0.39681	0.38637	0.37609	0.39364	0.38892	0.39326	0.38216	0.38511	0.37615	0.40938	0.40765	0.40489	0.41513	0.38748	0.40939	0.39042	0.38366	0.385	0.38414	0.38098	0.3899	0.40246	0.41093	0.39697	0.39989	0.40607	0.39543	0.43249	0.40181	0.40991	0.41014	0.39548
204	0.40571	0.41585	0.41467	0.40842	0.40194	0.41856	0.41724	0.4139	0.39882	0.42125	0.41953	0.3995	0.41829	0.42378	0.43169	0.43458	0.42542	0.45793	0.43689	0.41729	0.45084	0.44279	0.45055	0.42916	0.4342	0.41829	0.48408	0.48058	0.47531	0.49892	0.44003	0.48476	0.44499	0.43193	0.43424	0.43231	0.4268	0.44417	0.4691	0.4877	0.45899	0.46466	0.47952	0.45477	0.53023	0.46989	0.48567	0.48585	0.45757
205	0.45024	0.46655	0.46504	0.45486	0.44478	0.47044	0.46909	0.46244	0.43873	0.47581	0.4727	0.43974	0.47069	0.48216	0.49612	0.49778	0.48295	0.54047	0.50297	0.46999	0.52662	0.51448	0.52678	0.49046	0.49801	0.47302	0.58762	0.58167	0.57283	0.61912	0.50985	0.58977	0.51729	0.4949	0.49876	0.49489	0.48654	0.51622	0.55978	0.59409	0.54328	0.55302	0.58304	0.53386	0.66718	0.56449	0.59119	0.59102	0.54337
206	0.50445	0.52866	0.52703	0.51174	0.49731	0.53388	0.53307	0.52102	0.48672	0.54337	0.53831	0.4879	0.53527	0.55616	0.57858	0.57629	0.55443	0.64621	0.58612	0.53547	0.62229	0.60598	0.62349	0.56778	0.57795	0.54223	0.71965	0.71128	0.69874	0.77355	0.59906	0.72415	0.60907	0.57419	0.58036	0.57328	0.562	0.60794	0.67551	0.72877	0.65185	0.66667	0.71809	0.6339	0.83028	0.68773	0.72602	0.72515	0.65612
207	0.56855	0.60177	0.60042	0.57921	0.5601	0.60822	0.60877	0.58896	0.543	0.62316	0.61578	0.54404	0.61153	0.64532	0.67724	0.66742	0.63861	0.76577	0.68332	0.61345	0.73122	0.71285	0.73411	0.65965	0.67161	0.62597	0.85542	0.84681	0.83377	0.91915	0.70402	0.8618	0.71553	0.66773	0.67676	0.66534	0.65213	0.71471	0.80173	0.86427	0.77454	0.79285	0.86015	0.74685	0.95972	0.82271	0.86357	0.86204	0.78558
208	0.64006	0.68107	0.68054	0.65418	0.63128	0.68815	0.69087	0.6621	0.6061	0.70852	0.69914	0.60654	0.69388	0.74081	0.77825	0.75926	0.72714	0.86836	0.78021	0.69831	0.8307	0.81518	0.83511	0.75512	0.76655	0.7175	0.94373	0.93819	0.93012	0.98965	0.80655	0.94933	0.81674	0.7635	0.77462	0.7594	0.74699	0.81657	0.89983	0.94843	0.87812	0.89421	0.95292	0.84673	1.0024	0.92307	0.95031	0.94892	0.89397
209	0.71141	0.75481	0.75545	0.7276	0.70381	0.76128	0.76621	0.73086	0.67103	0.7841	0.77434	0.67044	0.7689	0.82157	0.85453	0.8304	0.80226	0.91974	0.85164	0.77571	0.8906	0.88222	0.8952	0.83173	0.83972	0.799	0.96142	0.95943	0.95745	0.98309	0.87653	0.96469	0.88258	0.83822	0.84878	0.83316	0.82497	0.88295	0.93793	0.96194	0.92729	0.93653	0.97033	0.90226	0.97986	0.95518	0.96491	0.96418	0.94176
210	0.76981	0.80713	0.80872	0.78506	0.76482	0.81173	0.81765	0.78221	0.72856	0.83186	0.82394	0.72685	0.81951	0.86546	0.8857	0.86366	0.84546	0.9176	0.8801	0.8272	0.9011	0.89952	0.90469	0.86929	0.87273	0.84884	0.93201	0.93203	0.93363	0.93877	0.89752	0.93346	0.89925	0.87266	0.8801	0.86797	0.86526	0.89977	0.92399	0.93034	0.92204	0.92521	0.93899	0.90702	0.92943	0.93408	0.93329	0.93308	0.93213
211	0.80321	0.828	0.82989	0.81452	0.80121	0.83028	0.83554	0.80668	0.76807	0.84402	0.83916	0.76569	0.83644	0.86783	0.87518	0.85923	0.85149	0.88236	0.86931	0.8432	0.87564	0.87809	0.878	0.86652	0.86652	0.85875	0.88124	0.88215	0.88539	0.88027	0.87867	0.88163	0.87769	0.86721	0.87105	0.86366	0.86501	0.87811	0.88182	0.87866	0.88453	0.88417	0.88654	0.8773	0.86903	0.88699	0.88129	0.88139	0.89088
212	0.80793	0.81922	0.82086	0.81414	0.80821	0.81957	0.82325	0.80392	0.78334	0.82648	0.82449	0.78102	0.82339	0.84023	0.83868	0.82884	0.82878	0.83116	0.83365	0.82834	0.83069	0.83505	0.83206	0.836	0.83408	0.83713	0.82182	0.82307	0.82703	0.81685	0.83702	0.82159	0.8347	0.83503	0.8361	0.83264	0.83613	0.83498	0.82695	0.81894	0.83192	0.82971	0.82586	0.82975	0.8055	0.82904	0.82119	0.82148	0.83571
213	0.78858	0.78914	0.79029	0.79029	0.7901	0.78821	0.79022	0.77991	0.77508	0.78966	0.78977	0.77337	0.78987	0.79559	0.78872	0.78369	0.78842	0.77297	0.78477	0.793	0.77637	0.78149	0.77703	0.79	0.78719	0.79636	0.75938	0.7607	0.76492	0.75232	0.78417	0.75878	0.78126	0.78814	0.78738	0.78667	0.79104	0.7814	0.76688	0.75648	0.77286	0.7697	0.76246	0.77391	0.74168	0.767	0.75838	0.75877	0.77489
214	0.75298	0.74611	0.74677	0.75134	0.75496	0.74444	0.745	0.742	0.74876	0.74193	0.74344	0.74788	0.74437	0.74218	0.73217	0.73081	0.73841	0.71185	0.72928	0.74598	0.71772	0.723	0.71785	0.73607	0.73292	0.74539	0.69621	0.69746	0.70171	0.68809	0.726	0.69538	0.72291	0.73377	0.73179	0.73299	0.73759	0.72293	0.70488	0.69344	0.7112	0.70759	0.69851	0.71436	0.67861	0.70367	0.69499	0.69547	0.71197
215	0.70743	0.69569	0.69589	0.70346	0.70945	0.69359	0.69298	0.69568	0.7103	0.68829	0.69072	0.71026	0.69219	0.68439	0.67256	0.67404	0.68331	0.64985	0.67065	0.69259	0.65733	0.66244	0.65704	0.67823	0.67505	0.68912	0.63342	0.63451	0.63867	0.62483	0.66553	0.63243	0.66249	0.67574	0.67294	0.67548	0.67998	0.6624	0.64256	0.63085	0.64885	0.64507	0.63505	0.65345	0.61676	0.6404	0.63207	0.63261	0.64867
216	0.65622	0.64133	0.64115	0.65064	0.65804	0.63903	0.63747	0.64456	0.66431	0.63171	0.63475	0.66502	0.63659	0.62475	0.61187	0.61562	0.62581	0.58805	0.61087	0.63602	0.59662	0.60138	0.596	0.61876	0.61572	0.63042	0.57156	0.57246	0.57646	0.56286	0.60445	0.57046	0.60158	0.61624	0.61288	0.6164	0.62059	0.60139	0.58078	0.56926	0.58682	0.58305	0.57259	0.59246	0.55633	0.5779	0.57015	0.57074	0.58588
217	0.60182	0.58493	0.58441	0.59513	0.60333	0.58255	0.58021	0.59078	0.61381	0.57377	0.5772	0.61517	0.5793	0.56447	0.55106	0.55668	0.5673	0.52694	0.55091	0.57793	0.53626	0.54057	0.53537	0.5588	0.55602	0.5707	0.51087	0.51154	0.51533	0.50228	0.54354	0.5097	0.54091	0.55635	0.55259	0.55685	0.56062	0.54064	0.51991	0.50887	0.52557	0.52191	0.51136	0.53197	0.49734	0.51647	0.50943	0.51005	0.52399
218	0.54573	0.52762	0.52679	0.53827	0.54685	0.52524	0.52225	0.53561	0.56064	0.51539	0.51907	0.56259	0.52133	0.50428	0.49069	0.49788	0.50859	0.46684	0.49132	0.51931	0.47666	0.48044	0.47554	0.49903	0.49656	0.51083	0.45149	0.45192	0.45549	0.44319	0.48326	0.45026	0.48092	0.49671	0.49267	0.49749	0.50078	0.48057	0.46018	0.4498	0.46538	0.4619	0.4515	0.47234	0.43979	0.4563	0.45004	0.4507	0.46327
219	0.48899	0.47022	0.46912	0.481	0.48969	0.46789	0.46435	0.47998	0.5061	0.45728	0.46108	0.50856	0.46346	0.44475	0.43125	0.43974	0.45032	0.40806	0.43259	0.46089	0.41818	0.42142	0.41687	0.43998	0.43785	0.45144	0.39364	0.39383	0.39715	0.38575	0.42405	0.39238	0.42201	0.43782	0.43361	0.43884	0.44162	0.4216	0.40186	0.39225	0.40656	0.4033	0.39323	0.41391	0.38378	0.39765	0.3922	0.39288	0.40401
220	0.43237	0.41337	0.41205	0.42407	0.43266	0.41115	0.40717	0.42458	0.45111	0.40003	0.40388	0.45401	0.40631	0.38647	0.37328	0.3828	0.39307	0.35111	0.37524	0.4033	0.3613	0.364	0.35985	0.38221	0.38042	0.39314	0.33776	0.33774	0.34079	0.33042	0.36642	0.33651	0.36469	0.38025	0.37594	0.38145	0.38372	0.36423	0.34542	0.33668	0.3496	0.34658	0.33701	0.35716	0.32968	0.34101	0.33637	0.33704	0.34672
221	0.37664	0.35782	0.35632	0.36822	0.37656	0.35572	0.35143	0.37013	0.39649	0.34437	0.34818	0.39976	0.35061	0.33017	0.31756	0.32776	0.33754	0.29675	0.32	0.34727	0.30678	0.30896	0.30523	0.32645	0.325	0.33671	0.28465	0.28445	0.2872	0.27797	0.31113	0.28343	0.3097	0.3247	0.3204	0.32605	0.32782	0.30921	0.29164	0.28384	0.29528	0.29255	0.28364	0.30284	0.27822	0.28719	0.28333	0.28397	0.2922
222	0.32265	0.30441	0.30281	0.31432	0.32225	0.30248	0.29804	0.31741	0.34306	0.29123	0.29491	0.34659	0.29727	0.2769	0.26516	0.27561	0.28471	0.24617	0.26791	0.29374	0.2557	0.2574	0.25414	0.27374	0.2726	0.28313	0.2355	0.23518	0.23758	0.22964	0.2593	0.23436	0.25815	0.27221	0.26806	0.27364	0.27495	0.25766	0.2417	0.23493	0.24478	0.24238	0.23436	0.25206	0.23056	0.2374	0.23429	0.23488	0.24167
223	0.27153	0.25439	0.25277	0.26355	0.27089	0.25265	0.24827	0.26753	0.29182	0.24193	0.24535	0.29548	0.24757	0.22809	0.2176	0.22773	0.2359	0.20095	0.22044	0.24403	0.20959	0.21086	0.2081	0.22551	0.22465	0.23382	0.19192	0.19155	0.19355	0.18702	0.21245	0.19091	0.21157	0.22423	0.22039	0.22566	0.22657	0.21111	0.19719	0.19157	0.19971	0.19767	0.19077	0.20636	0.18829	0.19327	0.19087	0.19138	0.19676
224	0.2248	0.20935	0.20781	0.21748	0.22403	0.20784	0.20376	0.22196	0.24415	0.19812	0.20116	0.24776	0.20315	0.1855	0.17662	0.18581	0.19282	0.16278	0.17929	0.1998	0.17015	0.17104	0.16882	0.1835	0.18287	0.19052	0.15552	0.15516	0.15672	0.15165	0.17231	0.15469	0.17166	0.18247	0.17912	0.18381	0.18438	0.17126	0.15977	0.15533	0.16172	0.16008	0.15446	0.16744	0.15299	0.15642	0.15466	0.15508	0.15913
225	0.18416	0.17094	0.16957	0.17781	0.18339	0.16969	0.16614	0.18234	0.2017	0.16139	0.16394	0.20505	0.16563	0.15057	0.14348	0.15129	0.15698	0.13261	0.1458	0.16266	0.13853	0.13912	0.13742	0.14911	0.14868	0.15474	0.12708	0.12677	0.12792	0.12419	0.14007	0.12643	0.13961	0.14833	0.14557	0.1495	0.14982	0.13929	0.13033	0.127	0.13176	0.13051	0.12619	0.13639	0.1254	0.12764	0.12642	0.12674	0.12962
226	0.15099	0.14033	0.13921	0.14581	0.15032	0.13934	0.13646	0.14997	0.16597	0.1327	0.13471	0.16887	0.13606	0.124	0.11867	0.12487	0.12924	0.11056	0.12053	0.1336	0.11505	0.11543	0.11419	0.123	0.1227	0.12727	0.10653	0.10628	0.10708	0.10446	0.1161	0.10605	0.11579	0.12243	0.1203	0.12339	0.12355	0.11555	0.1089	0.10652	0.1099	0.109	0.10582	0.11345	0.10546	0.10686	0.10605	0.10627	0.10824
227	0.12571	0.11751	0.11665	0.1217	0.12519	0.11677	0.11455	0.12525	0.13784	0.1117	0.11323	0.14018	0.11425	0.10498	0.10111	0.10585	0.10909	0.09522	0.10254	0.11231	0.098535	0.098769	0.097879	0.10433	0.10412	0.10746	0.092328	0.092145	0.092677	0.090868	0.09923	0.091981	0.099023	0.10392	0.10234	0.10469	0.10475	0.098852	0.094028	0.092352	0.094721	0.094075	0.091764	0.097362	0.091657	0.092505	0.091981	0.092137	0.093452
228	0.10759	0.10144	0.1008	0.10458	0.10723	0.10089	0.09924	0.10747	0.11708	0.097106	0.098247	0.11886	0.099008	0.091972	0.089193	0.092778	0.095163	0.084903	0.09028	0.097511	0.087351	0.087496	0.086854	0.091569	0.091415	0.093856	0.08281	0.082679	0.083024	0.08177	0.087809	0.082559	0.087668	0.091275	0.090109	0.091878	0.091892	0.087548	0.08404	0.082853	0.084519	0.084053	0.08236	0.086494	0.082395	0.082897	0.082561	0.082668	0.083542
229	0.095191	0.090584	0.090109	0.09294	0.094968	0.090166	0.088941	0.095268	0.10256	0.087332	0.088194	0.10387	0.088764	0.083365	0.081346	0.084091	0.08587	0.078172	0.082177	0.087599	0.080006	0.080097	0.079625	0.083121	0.083001	0.084821	0.076628	0.076536	0.076752	0.075875	0.080309	0.076445	0.08021	0.082905	0.082036	0.083389	0.083378	0.080126	0.077535	0.076681	0.077867	0.077526	0.07626	0.07937	0.076378	0.076659	0.076448	0.076521	0.0771
230	0.087007	0.083491	0.083138	0.085301	0.08689	0.083168	0.08225	0.087185	0.092806	0.081012	0.081678	0.093748	0.082111	0.077876	0.07639	0.078531	0.079888	0.073995	0.077035	0.081187	0.075395	0.07545	0.075096	0.07774	0.077641	0.079033	0.072836	0.072773	0.072898	0.072282	0.075594	0.0727	0.075522	0.077576	0.076917	0.077974	0.077952	0.075463	0.073515	0.072894	0.073747	0.073493	0.072526	0.074914	0.072693	0.072831	0.072704	0.072753	0.073129
231	0.08182	0.079072	0.078807	0.0805	0.081783	0.078815	0.078117	0.082051	0.086494	0.07714	0.077668	0.087172	0.078005	0.074598	0.073487	0.075195	0.076254	0.071645	0.073997	0.077252	0.072733	0.072766	0.072493	0.074535	0.074448	0.075543	0.070757	0.070715	0.070775	0.070344	0.072861	0.070656	0.072807	0.074407	0.073898	0.074743	0.074716	0.072767	0.071275	0.070818	0.071436	0.071244	0.070489	0.072363	0.070687	0.070728	0.07066	0.070691	0.070926
232	0.07876	0.076554	0.076353	0.077713	0.078783	0.076343	0.075803	0.07902	0.082634	0.075011	0.075442	0.083121	0.07571	0.072895	0.07205	0.073446	0.074294	0.070601	0.072463	0.075081	0.071466	0.071484	0.071269	0.072883	0.072804	0.07369	0.069904	0.069879	0.069893	0.06959	0.071545	0.069828	0.071504	0.072779	0.072377	0.073071	0.073042	0.071476	0.070308	0.069967	0.070421	0.070271	0.069667	0.071174	0.069884	0.06986	0.069832	0.069852	0.069987
233	0.077218	0.075395	0.07524	0.076365	0.077284	0.075217	0.07479	0.077491	0.08052	0.07413	0.074491	0.08087	0.07471	0.072317	0.071661	0.072833	0.073533	0.070491	0.072003	0.07417	0.071196	0.071204	0.07103	0.07234	0.072267	0.073006	0.06993	0.069916	0.069896	0.069685	0.071241	0.069871	0.071208	0.072254	0.071928	0.072513	0.072484	0.07119	0.070253	0.069993	0.07033	0.070211	0.069714	0.07096	0.069944	0.069874	0.069875	0.069886	0.069952
234	0.076758	0.075207	0.075083	0.076042	0.076856	0.075052	0.074705	0.077037	0.079652	0.074138	0.07445	0.079903	0.074635	0.072542	0.072019	0.073031	0.073626	0.071047	0.072311	0.074157	0.071638	0.071639	0.071494	0.072589	0.072519	0.073155	0.070583	0.070578	0.070535	0.070388	0.07166	0.070537	0.071633	0.072515	0.072244	0.072751	0.072722	0.071621	0.070848	0.070646	0.0709	0.070804	0.070382	0.071443	0.070622	0.07052	0.070541	0.070546	0.070562
235	0.077077	0.075717	0.075617	0.076459	0.077198	0.075578	0.075288	0.077359	0.079684	0.074787	0.075065	0.079865	0.075225	0.073345	0.072917	0.073814	0.074335	0.072086	0.073173	0.074793	0.072596	0.072592	0.072467	0.07341	0.073342	0.073905	0.071692	0.071693	0.071633	0.071533	0.072601	0.071655	0.072578	0.073344	0.073111	0.073564	0.073535	0.072571	0.071915	0.071756	0.07195	0.071869	0.071502	0.072429	0.07175	0.071623	0.071659	0.07166	0.07164
236	0.077933	0.076709	0.076626	0.077384	0.078071	0.076582	0.076332	0.078216	0.080335	0.075879	0.076132	0.080465	0.076274	0.074548	0.074188	0.075002	0.07547	0.073459	0.074418	0.075874	0.07391	0.073903	0.073793	0.074625	0.074559	0.075069	0.073117	0.073122	0.07305	0.072985	0.073903	0.073087	0.073883	0.074565	0.07436	0.074772	0.074744	0.07388	0.07331	0.073181	0.073331	0.073261	0.072935	0.073764	0.073192	0.073044	0.073091	0.073088	0.073042
237	0.079166	0.07804	0.077968	0.078666	0.079315	0.077921	0.077701	0.079449	0.081421	0.077282	0.077517	0.081515	0.077646	0.076032	0.075721	0.076476	0.076904	0.075069	0.075933	0.07727	0.075476	0.075465	0.075367	0.076117	0.076054	0.076524	0.074766	0.074773	0.074692	0.074653	0.07546	0.074741	0.075442	0.076062	0.075877	0.076261	0.076232	0.075441	0.074935	0.07483	0.074946	0.074885	0.07459	0.075345	0.074855	0.074688	0.074745	0.07474	0.074673
238	0.080669	0.079614	0.07955	0.080205	0.080825	0.079502	0.079302	0.080952	0.082817	0.078908	0.079129	0.082887	0.07925	0.077717	0.077442	0.078154	0.078553	0.076847	0.077641	0.07889	0.077223	0.077209	0.07712	0.077809	0.077747	0.078188	0.076575	0.076584	0.076496	0.076478	0.077198	0.076553	0.077184	0.077757	0.077587	0.077949	0.07792	0.077184	0.076726	0.07664	0.076729	0.076675	0.076403	0.077103	0.076678	0.076493	0.076558	0.076551	0.076467
239	0.082366	0.081363	0.081305	0.081927	0.082527	0.081255	0.08107	0.08265	0.084438	0.080694	0.080906	0.08449	0.08102	0.079547	0.079298	0.079979	0.080357	0.078747	0.079488	0.080672	0.079099	0.079082	0.079	0.079644	0.079584	0.080001	0.0785	0.078509	0.078416	0.078415	0.079068	0.07848	0.079055	0.079595	0.079435	0.079782	0.079752	0.079056	0.078635	0.078566	0.078632	0.078583	0.07833	0.078987	0.078617	0.078414	0.078485	0.078478	0.078378
240	0.084203	0.083238	0.083183	0.083782	0.084366	0.083133	0.082958	0.084489	0.08622	0.082596	0.082801	0.08626	0.08291	0.08148	0.08125	0.08191	0.082271	0.080733	0.081435	0.082571	0.081068	0.081048	0.080972	0.081581	0.081523	0.081922	0.080507	0.080516	0.08042	0.080434	0.081031	0.08049	0.08102	0.081534	0.081382	0.081718	0.081686	0.081022	0.080631	0.080574	0.080621	0.080577	0.080339	0.080963	0.08064	0.080417	0.080495	0.080487	0.080373
241	0.086143	0.085205	0.085153	0.085735	0.086307	0.085103	0.084935	0.086431	0.088122	0.084582	0.084782	0.088153	0.084888	0.083488	0.083274	0.083919	0.084267	0.082784	0.083455	0.084554	0.083105	0.083082	0.083012	0.083593	0.083537	0.083921	0.082576	0.082585	0.082485	0.082512	0.083063	0.082561	0.083055	0.083549	0.083402	0.08373	0.083696	0.083057	0.082689	0.082645	0.082674	0.082634	0.082409	0.083006	0.082726	0.082481	0.082566	0.082557	0.08243
242	0.088147	0.08723	0.087179	0.087749	0.088311	0.087131	0.086967	0.088438	0.090098	0.086622	0.086818	0.090124	0.086921	0.085544	0.085342	0.085976	0.086314	0.084875	0.085521	0.086592	0.085186	0.08516	0.085094	0.085652	0.085599	0.085969	0.084685	0.084692	0.08459	0.08463	0.085138	0.084671	0.085132	0.08561	0.085468	0.085789	0.085753	0.085134	0.084788	0.084755	0.084767	0.084731	0.084518	0.085091	0.084854	0.084584	0.084676	0.084667	0.084526
243	0.090199	0.089299	0.089249	0.089808	0.090363	0.089202	0.08904	0.090496	0.09213	0.088702	0.088894	0.092153	0.088995	0.087636	0.087443	0.088071	0.0884	0.086998	0.087623	0.088669	0.0873	0.08727	0.08721	0.087747	0.087697	0.088054	0.086824	0.08683	0.086725	0.086779	0.087247	0.086811	0.087243	0.087707	0.087568	0.087885	0.087847	0.087245	0.086917	0.086897	0.086892	0.086859	0.086657	0.087209	0.087014	0.086717	0.086817	0.086808	0.086652
244	0.09229	0.091403	0.091353	0.091904	0.092452	0.091308	0.091148	0.092593	0.094208	0.090814	0.091004	0.094228	0.091104	0.089757	0.089572	0.090197	0.090517	0.089146	0.089753	0.090779	0.089442	0.089407	0.089351	0.089871	0.089823	0.090169	0.08899	0.088994	0.088886	0.088954	0.089382	0.088978	0.089381	0.089833	0.089697	0.09001	0.089969	0.089382	0.089073	0.089065	0.089041	0.089013	0.088821	0.089354	0.089203	0.088875	0.088984	0.088975	0.088803
245	0.094409	0.093532	0.093483	0.094027	0.094569	0.09344	0.093279	0.094718	0.096317	0.09295	0.093138	0.096337	0.093236	0.091898	0.091721	0.092344	0.092657	0.091314	0.091904	0.092912	0.091604	0.091564	0.091514	0.092017	0.091972	0.092306	0.091176	0.091178	0.091067	0.09115	0.091537	0.091165	0.091539	0.09198	0.091846	0.092157	0.092112	0.09154	0.091249	0.091254	0.091211	0.091186	0.091006	0.091519	0.091416	0.091053	0.091172	0.091163	0.090974
246	0.096555	0.095688	0.095638	0.096176	0.096713	0.095597	0.095436	0.096873	0.098459	0.09511	0.095296	0.098479	0.095393	0.094062	0.093891	0.094515	0.094821	0.093503	0.094077	0.095069	0.093788	0.093743	0.093698	0.094184	0.094143	0.094465	0.093384	0.093384	0.093269	0.093369	0.093713	0.093374	0.093718	0.094149	0.094017	0.094326	0.094277	0.09372	0.093446	0.093465	0.093402	0.093381	0.093212	0.093706	0.093653	0.093252	0.093381	0.093373	0.093164
247	0.098725	0.097865	0.097814	0.098348	0.098879	0.097776	0.097614	0.099052	0.10063	0.097291	0.097475	0.10065	0.097572	0.096244	0.09608	0.096706	0.097005	0.095712	0.09627	0.097247	0.095991	0.09594	0.095901	0.096371	0.096333	0.096643	0.095613	0.095609	0.095491	0.095609	0.095908	0.095603	0.095917	0.096338	0.096207	0.096515	0.096462	0.095918	0.095663	0.095697	0.095612	0.095595	0.095439	0.095913	0.095914	0.095471	0.095611	0.095603	0.095374
248	0.10092	0.10006	0.10001	0.10054	0.10107	0.099976	0.099812	0.10125	0.10282	0.099492	0.099675	0.10284	0.099771	0.098445	0.098287	0.098917	0.099209	0.097939	0.098481	0.099444	0.098214	0.098157	0.098123	0.098576	0.098543	0.09884	0.097862	0.097855	0.097734	0.097871	0.098122	0.097853	0.098135	0.098546	0.098416	0.098724	0.098665	0.098135	0.0979	0.097951	0.097841	0.097829	0.097686	0.098139	0.098199	0.097709	0.097862	0.097854	0.097602
249	0.10313	0.10228	0.10223	0.10275	0.10328	0.1022	0.10203	0.10348	0.10503	0.10171	0.10189	0.10506	0.10199	0.10067	0.10051	0.10115	0.10143	0.10019	0.10071	0.10166	0.10046	0.10039	0.10037	0.1008	0.10077	0.10106	0.10014	0.10013	0.1	0.10016	0.10036	0.10013	0.10037	0.10077	0.10065	0.10095	0.10089	0.10037	0.10016	0.10023	0.10009	0.10009	0.099956	0.10039	0.10051	0.09997	0.10014	0.10013	0.099852
250	0.10536	0.10452	0.10447	0.10499	0.10551	0.10444	0.10427	0.10573	0.10727	0.10396	0.10414	0.1073	0.10423	0.10291	0.10276	0.1034	0.10368	0.10246	0.10297	0.1039	0.10272	0.10265	0.10263	0.10305	0.10302	0.10329	0.10243	0.10242	0.10229	0.10247	0.10261	0.10243	0.10263	0.10302	0.1029	0.1032	0.10313	0.10263	0.10244	0.10253	0.10236	0.10236	0.10225	0.10266	0.10285	0.10225	0.10244	0.10243	0.10212
251	0.10762	0.10678	0.10673	0.10725	0.10776	0.1067	0.10653	0.108	0.10954	0.10622	0.1064	0.10956	0.10649	0.10516	0.10503	0.10568	0.10594	0.10475	0.10524	0.10616	0.10501	0.10493	0.10492	0.10531	0.10529	0.10555	0.10475	0.10473	0.1046	0.10481	0.10488	0.10475	0.10491	0.10529	0.10516	0.10547	0.10539	0.10491	0.10474	0.10485	0.10466	0.10466	0.10456	0.10495	0.10522	0.10456	0.10476	0.10475	0.10441
252	0.1099	0.10907	0.10901	0.10953	0.11003	0.10899	0.10882	0.11029	0.11182	0.10851	0.10868	0.11185	0.10878	0.10745	0.10732	0.10798	0.10823	0.10707	0.10754	0.10844	0.10732	0.10723	0.10723	0.1076	0.10759	0.10783	0.1071	0.10708	0.10694	0.10718	0.10718	0.1071	0.10722	0.10758	0.10746	0.10777	0.10768	0.10721	0.10708	0.10721	0.10698	0.10699	0.10691	0.10726	0.10763	0.10689	0.10711	0.1071	0.10673
253	0.1122	0.11138	0.11132	0.11183	0.11233	0.11131	0.11113	0.11262	0.11414	0.11082	0.11099	0.11417	0.11109	0.10976	0.10964	0.1103	0.11055	0.10942	0.10986	0.11075	0.10966	0.10956	0.10957	0.10992	0.10991	0.11013	0.10948	0.10946	0.10931	0.10958	0.10951	0.10948	0.10955	0.1099	0.10978	0.11009	0.10999	0.10955	0.10944	0.1096	0.10933	0.10935	0.10929	0.10961	0.11007	0.10925	0.1095	0.10949	0.10908
254	0.11453	0.11372	0.11365	0.11416	0.11466	0.11365	0.11346	0.11496	0.11648	0.11316	0.11333	0.11651	0.11342	0.11209	0.11198	0.11265	0.11289	0.11179	0.11222	0.11308	0.11203	0.11192	0.11194	0.11226	0.11226	0.11246	0.1119	0.11186	0.11171	0.11202	0.11186	0.1119	0.11191	0.11225	0.11213	0.11243	0.11233	0.1119	0.11183	0.11202	0.1117	0.11173	0.1117	0.11198	0.11255	0.11165	0.11191	0.11191	0.11146
255	0.11689	0.11608	0.11601	0.11652	0.11701	0.11601	0.11582	0.11734	0.11884	0.11552	0.11569	0.11888	0.11579	0.11445	0.11435	0.11504	0.11526	0.1142	0.1146	0.11544	0.11443	0.11431	0.11434	0.11463	0.11464	0.11481	0.11435	0.1143	0.11415	0.11449	0.11425	0.11435	0.1143	0.11462	0.1145	0.11481	0.1147	0.11429	0.11425	0.11448	0.11411	0.11415	0.11414	0.11439	0.11508	0.11407	0.11436	0.11436	0.11386
256	0.11928	0.11848	0.11841	0.11891	0.11939	0.11842	0.11822	0.11976	0.12125	0.11792	0.1181	0.12129	0.11819	0.11685	0.11676	0.11746	0.11767	0.11665	0.11702	0.11784	0.11687	0.11673	0.11678	0.11704	0.11706	0.1172	0.11685	0.1168	0.11663	0.11702	0.11667	0.11685	0.11673	0.11704	0.11692	0.11722	0.1171	0.11672	0.11673	0.11699	0.11657	0.11661	0.11664	0.11684	0.11766	0.11655	0.11687	0.11686	0.11631
257	0.12171	0.12092	0.12084	0.12133	0.12181	0.12086	0.12065	0.12221	0.12368	0.12036	0.12053	0.12373	0.12062	0.11928	0.1192	0.11991	0.12011	0.11914	0.11947	0.12026	0.11935	0.1192	0.11925	0.11948	0.11951	0.11962	0.11939	0.11933	0.11915	0.1196	0.11913	0.11939	0.1192	0.11948	0.11936	0.11967	0.11954	0.11919	0.11924	0.11954	0.11906	0.11912	0.11917	0.11932	0.12029	0.11906	0.11941	0.11941	0.1188
258	0.12416	0.12338	0.12331	0.12379	0.12425	0.12332	0.12312	0.12469	0.12615	0.12283	0.12299	0.1262	0.12309	0.12174	0.12168	0.1224	0.12258	0.12166	0.12196	0.12272	0.12187	0.12169	0.12177	0.12195	0.12199	0.12208	0.12197	0.1219	0.12172	0.12222	0.12162	0.12198	0.1217	0.12196	0.12184	0.12215	0.12201	0.12169	0.12179	0.12213	0.12159	0.12166	0.12175	0.12184	0.12298	0.12161	0.122	0.12199	0.12133
259	0.12666	0.1259	0.12582	0.12629	0.12675	0.12585	0.12563	0.12723	0.12867	0.12535	0.12551	0.12873	0.1256	0.12425	0.1242	0.12494	0.12511	0.12424	0.1245	0.12523	0.12444	0.12425	0.12434	0.12448	0.12453	0.12458	0.12462	0.12454	0.12435	0.12491	0.12416	0.12463	0.12425	0.12449	0.12438	0.12469	0.12452	0.12424	0.1244	0.1248	0.12417	0.12426	0.12439	0.12443	0.12575	0.12423	0.12466	0.12465	0.12392
260	0.12921	0.12846	0.12837	0.12884	0.12928	0.12841	0.12819	0.1298	0.13122	0.12791	0.12807	0.13129	0.12816	0.1268	0.12678	0.12753	0.12768	0.12688	0.12709	0.12779	0.12706	0.12685	0.12696	0.12705	0.12711	0.12712	0.12733	0.12724	0.12703	0.12767	0.12675	0.12734	0.12686	0.12707	0.12696	0.12727	0.12709	0.12684	0.12706	0.12752	0.12681	0.12691	0.12709	0.12706	0.12858	0.1269	0.12737	0.12737	0.12655
261	0.13179	0.13106	0.13097	0.13142	0.13185	0.13101	0.13078	0.13243	0.13382	0.13051	0.13067	0.1339	0.13076	0.1294	0.12939	0.13017	0.13029	0.12956	0.12972	0.13038	0.12973	0.12949	0.12962	0.12966	0.12974	0.12971	0.13009	0.12999	0.12977	0.13049	0.12939	0.13011	0.12951	0.12969	0.12958	0.12989	0.12969	0.12949	0.12978	0.1303	0.1295	0.12962	0.12985	0.12974	0.13149	0.12962	0.13014	0.13014	0.12924
262	0.13443	0.13371	0.13361	0.13406	0.13448	0.13367	0.13343	0.1351	0.13647	0.13317	0.13332	0.13655	0.13341	0.13205	0.13206	0.13286	0.13296	0.13231	0.13241	0.13302	0.13245	0.1322	0.13235	0.13233	0.13242	0.13235	0.13293	0.13281	0.13258	0.13339	0.13208	0.13295	0.13222	0.13236	0.13226	0.13257	0.13235	0.1322	0.13256	0.13315	0.13225	0.13239	0.13268	0.13248	0.13448	0.13241	0.13298	0.13298	0.13199
263	0.13712	0.13642	0.13632	0.13675	0.13715	0.13639	0.13614	0.13784	0.13918	0.13589	0.13603	0.13927	0.13612	0.13476	0.1348	0.13561	0.13568	0.13513	0.13517	0.13573	0.13525	0.13497	0.13515	0.13506	0.13516	0.13504	0.13585	0.13572	0.13547	0.13638	0.13485	0.13588	0.13499	0.1351	0.135	0.13531	0.13507	0.13497	0.13542	0.13609	0.13508	0.13524	0.13559	0.13529	0.13758	0.13528	0.13591	0.13591	0.13481
264	0.13987	0.13919	0.13908	0.1395	0.13989	0.13917	0.13891	0.14063	0.14194	0.13866	0.13881	0.14204	0.13889	0.13753	0.1376	0.13843	0.13847	0.13802	0.13799	0.13849	0.13812	0.13781	0.13801	0.13785	0.13797	0.1378	0.13886	0.13871	0.13844	0.13947	0.13767	0.13889	0.13784	0.13791	0.13781	0.13812	0.13786	0.13782	0.13836	0.13912	0.13798	0.13816	0.13859	0.13817	0.14079	0.13823	0.13893	0.13892	0.13771
265	0.14268	0.14203	0.14191	0.14232	0.14268	0.14201	0.14174	0.1435	0.14477	0.1415	0.14164	0.14487	0.14172	0.14036	0.14046	0.14132	0.14133	0.14099	0.14087	0.14131	0.14106	0.14072	0.14095	0.1407	0.14085	0.14061	0.14195	0.14179	0.1415	0.14266	0.14057	0.14199	0.14076	0.14078	0.14068	0.14099	0.1407	0.14073	0.14138	0.14223	0.14096	0.14116	0.14168	0.14113	0.14411	0.14127	0.14203	0.14203	0.14069
266	0.14555	0.14493	0.14481	0.14519	0.14553	0.14492	0.14464	0.14643	0.14766	0.14442	0.14455	0.14777	0.14463	0.14327	0.1434	0.14428	0.14425	0.14404	0.14384	0.14421	0.14409	0.14371	0.14398	0.14364	0.14381	0.1435	0.14515	0.14496	0.14465	0.14596	0.14355	0.1452	0.14375	0.14372	0.14363	0.14394	0.14362	0.14372	0.1445	0.14546	0.14403	0.14426	0.14487	0.14418	0.14756	0.1444	0.14524	0.14524	0.14376
267	0.1485	0.14791	0.14778	0.14815	0.14847	0.14792	0.14762	0.14945	0.15062	0.14741	0.14754	0.15075	0.14761	0.14626	0.14643	0.14733	0.14727	0.1472	0.1469	0.14718	0.14722	0.1468	0.1471	0.14666	0.14685	0.14647	0.14848	0.14827	0.14793	0.14941	0.14662	0.14853	0.14685	0.14675	0.14667	0.14697	0.14663	0.14681	0.14773	0.14881	0.1472	0.14747	0.14819	0.14733	0.15118	0.14764	0.14858	0.14858	0.14694
268	0.15153	0.15098	0.15084	0.15119	0.15147	0.151	0.15069	0.15255	0.15367	0.15049	0.15061	0.15381	0.15068	0.14934	0.14955	0.15048	0.15037	0.15047	0.15005	0.15024	0.15044	0.14998	0.15033	0.14976	0.14998	0.14952	0.15193	0.15169	0.15133	0.15301	0.14978	0.152	0.15004	0.14988	0.1498	0.1501	0.14972	0.15	0.15107	0.1523	0.15048	0.15079	0.15164	0.15058	0.15496	0.15101	0.15205	0.15205	0.15022
269	0.15464	0.15414	0.15399	0.15431	0.15456	0.15416	0.15384	0.15574	0.1568	0.15366	0.15377	0.15695	0.15384	0.1525	0.15277	0.15372	0.15356	0.15385	0.1533	0.15339	0.15378	0.15326	0.15366	0.15297	0.15322	0.15266	0.15552	0.15525	0.15486	0.15676	0.15305	0.1556	0.15333	0.1531	0.15303	0.15332	0.15291	0.15329	0.15453	0.15592	0.15388	0.15422	0.15523	0.15394	0.15892	0.1545	0.15566	0.15566	0.15363
270	0.15785	0.15738	0.15723	0.15751	0.15773	0.15743	0.15708	0.15902	0.16001	0.15693	0.15702	0.16018	0.15709	0.15577	0.15609	0.15707	0.15685	0.15735	0.15665	0.15663	0.15723	0.15666	0.15711	0.15627	0.15655	0.15589	0.15926	0.15896	0.15853	0.16069	0.15642	0.15935	0.15674	0.15642	0.15636	0.15665	0.1562	0.1567	0.15813	0.15969	0.1574	0.15779	0.15896	0.15743	0.16308	0.15813	0.15942	0.15942	0.15716
271	0.16115	0.16074	0.16058	0.16083	0.16101	0.1608	0.16044	0.16242	0.16333	0.16031	0.16039	0.16352	0.16045	0.15915	0.15953	0.16054	0.16026	0.16101	0.16013	0.15998	0.16082	0.1602	0.16071	0.15969	0.16001	0.15924	0.16319	0.16285	0.16239	0.16484	0.15993	0.1633	0.16029	0.15986	0.15982	0.1601	0.1596	0.16024	0.16189	0.16367	0.16108	0.16153	0.16289	0.16106	0.1675	0.16194	0.16337	0.16337	0.16085
272	0.16457	0.16422	0.16404	0.16425	0.16439	0.16429	0.16392	0.16594	0.16676	0.16381	0.16388	0.16696	0.16393	0.16265	0.16311	0.16415	0.16379	0.16482	0.16375	0.16345	0.16456	0.16387	0.16445	0.16324	0.16361	0.1627	0.16732	0.16693	0.16643	0.16923	0.16358	0.16744	0.16397	0.16344	0.16341	0.16368	0.16313	0.16392	0.16583	0.16784	0.16492	0.16543	0.16702	0.16484	0.17219	0.16592	0.16753	0.16752	0.16471
273	0.1681	0.16782	0.16763	0.1678	0.16788	0.16791	0.16752	0.16959	0.1703	0.16744	0.16749	0.17052	0.16754	0.16629	0.16683	0.16789	0.16745	0.16881	0.16751	0.16705	0.16847	0.1677	0.16836	0.16693	0.16734	0.16629	0.17167	0.17122	0.17068	0.1739	0.16738	0.17181	0.16782	0.16716	0.16715	0.1674	0.1668	0.16776	0.16996	0.17224	0.16894	0.16952	0.17138	0.16879	0.17719	0.17011	0.17191	0.1719	0.16875
274	0.17176	0.17157	0.17136	0.17148	0.17151	0.17168	0.17126	0.17338	0.17397	0.17122	0.17125	0.17421	0.17129	0.17008	0.17072	0.17181	0.17127	0.17301	0.17145	0.17078	0.17257	0.17171	0.17245	0.17078	0.17124	0.17003	0.17628	0.17578	0.17518	0.17889	0.17135	0.17645	0.17185	0.17104	0.17105	0.17128	0.17062	0.17178	0.17432	0.17691	0.17318	0.17383	0.17601	0.17294	0.18257	0.17454	0.17656	0.17655	0.17302
275	0.17557	0.17546	0.17524	0.1753	0.17527	0.1756	0.17516	0.17733	0.17778	0.17516	0.17517	0.17805	0.1752	0.17404	0.17478	0.1759	0.17526	0.17743	0.17556	0.17468	0.17687	0.17592	0.17676	0.17481	0.17532	0.17392	0.18118	0.18061	0.17996	0.18425	0.17552	0.18139	0.17607	0.17509	0.17513	0.17534	0.17461	0.176	0.17892	0.18188	0.17764	0.17839	0.18095	0.17731	0.18838	0.17924	0.18151	0.18149	0.17752
276	0.17953	0.17953	0.1793	0.17929	0.17918	0.1797	0.17923	0.18146	0.18175	0.17928	0.17926	0.18204	0.17928	0.17818	0.17905	0.18019	0.17943	0.1821	0.17989	0.17875	0.1814	0.18036	0.1813	0.17902	0.1796	0.17799	0.18644	0.18579	0.18506	0.19006	0.1799	0.18668	0.18052	0.17935	0.17941	0.1796	0.17879	0.18045	0.18382	0.18721	0.18237	0.18323	0.18624	0.18192	0.1947	0.18425	0.18681	0.18679	0.1823
277	0.18367	0.18379	0.18354	0.18345	0.18326	0.18399	0.1835	0.18578	0.18588	0.1836	0.18354	0.1862	0.18355	0.18253	0.18354	0.18471	0.18381	0.18707	0.18444	0.18301	0.18621	0.18504	0.18611	0.18345	0.1841	0.18226	0.19208	0.19133	0.19054	0.19638	0.18453	0.19237	0.18522	0.18382	0.18392	0.18408	0.18318	0.18514	0.18904	0.19294	0.18741	0.18839	0.19195	0.1868	0.20163	0.18961	0.19252	0.19249	0.18741
278	0.18799	0.18826	0.18799	0.18781	0.18753	0.18849	0.18797	0.19031	0.1902	0.18813	0.18805	0.19055	0.18804	0.18712	0.18829	0.18947	0.18842	0.19237	0.18926	0.18748	0.19131	0.19001	0.19122	0.18813	0.18886	0.18675	0.19819	0.19733	0.19646	0.20334	0.18944	0.19854	0.19021	0.18854	0.18868	0.1888	0.18781	0.19013	0.19464	0.19915	0.19279	0.19392	0.19815	0.19201	0.20928	0.19539	0.1987	0.19867	0.19288
279	0.19254	0.19297	0.19267	0.19239	0.192	0.19324	0.19269	0.19507	0.19473	0.19292	0.19279	0.19512	0.19277	0.19196	0.19333	0.19452	0.19329	0.19807	0.19437	0.1922	0.19675	0.1953	0.19668	0.19308	0.1939	0.19148	0.20485	0.20385	0.20289	0.21108	0.19466	0.20526	0.19553	0.19355	0.19374	0.19381	0.19271	0.19544	0.20068	0.20592	0.19858	0.19988	0.20494	0.19757	0.21784	0.20167	0.20546	0.20541	0.1988
280	0.19731	0.19793	0.19761	0.19722	0.1967	0.19825	0.19767	0.20011	0.19949	0.19798	0.1978	0.19991	0.19776	0.19711	0.19871	0.19989	0.19845	0.2042	0.19981	0.19718	0.20259	0.20097	0.20253	0.19834	0.19926	0.1965	0.21216	0.21099	0.20993	0.21975	0.20024	0.21266	0.20122	0.19887	0.19912	0.19913	0.19791	0.20113	0.20724	0.21335	0.20483	0.20635	0.21244	0.20355	0.22747	0.20852	0.21287	0.21281	0.20522
281	0.20236	0.20319	0.20285	0.20231	0.20165	0.20356	0.20295	0.20544	0.2045	0.20336	0.20312	0.20496	0.20306	0.20259	0.20446	0.20563	0.20394	0.21086	0.20564	0.20247	0.20889	0.20706	0.20885	0.20396	0.20499	0.20183	0.22025	0.21888	0.21772	0.2296	0.20624	0.22085	0.20735	0.20456	0.20489	0.20482	0.20346	0.20725	0.2144	0.22158	0.21164	0.21341	0.2208	0.21001	0.23847	0.21606	0.2211	0.22102	0.21225
282	0.2077	0.20879	0.20842	0.20772	0.2069	0.20922	0.20857	0.21111	0.20979	0.2091	0.20879	0.2103	0.2087	0.20846	0.21066	0.21178	0.20981	0.21814	0.21191	0.2081	0.21571	0.21366	0.21571	0.20998	0.21114	0.20752	0.2293	0.22767	0.2264	0.24097	0.21273	0.23003	0.21398	0.21067	0.21108	0.21092	0.20941	0.21388	0.22229	0.23078	0.21911	0.22119	0.23025	0.21703	0.25119	0.22445	0.23032	0.23021	0.22002
283	0.21337	0.21477	0.21437	0.21348	0.21247	0.21526	0.21458	0.21716	0.21541	0.21525	0.21486	0.21596	0.21473	0.21479	0.21737	0.21842	0.21611	0.22615	0.2187	0.21413	0.22316	0.22085	0.2232	0.21648	0.21779	0.21363	0.23953	0.23757	0.2362	0.25429	0.21978	0.24042	0.2212	0.21726	0.21779	0.2175	0.21582	0.2211	0.23105	0.24118	0.22736	0.22983	0.24104	0.22472	0.26614	0.23387	0.24076	0.24062	0.22868
284	0.21943	0.22118	0.22075	0.21963	0.2184	0.22175	0.22104	0.22364	0.22138	0.22187	0.22138	0.22199	0.22121	0.22164	0.22469	0.22561	0.22292	0.23505	0.22609	0.22061	0.23134	0.22873	0.23144	0.22353	0.22501	0.22022	0.25123	0.24885	0.2474	0.27022	0.2275	0.25233	0.22912	0.22442	0.22509	0.22464	0.22276	0.22903	0.24089	0.25307	0.23658	0.23952	0.25358	0.2332	0.284	0.24458	0.25273	0.25254	0.23846
285	0.22593	0.22809	0.22764	0.22625	0.22477	0.22875	0.22801	0.23062	0.22777	0.22903	0.22842	0.22844	0.22821	0.22912	0.23274	0.23347	0.23031	0.24502	0.23419	0.22762	0.24041	0.23745	0.24059	0.23123	0.2329	0.22739	0.26482	0.26187	0.2604	0.28968	0.23603	0.26618	0.23788	0.23224	0.2331	0.23244	0.23034	0.23781	0.25203	0.26685	0.24697	0.25051	0.26841	0.24262	0.30576	0.25691	0.26664	0.26639	0.24963
286	0.23293	0.23559	0.2351	0.23339	0.23161	0.23635	0.23559	0.23817	0.23463	0.23684	0.23608	0.23536	0.23581	0.23733	0.24164	0.24209	0.23839	0.25633	0.24313	0.23524	0.25053	0.24717	0.25083	0.2397	0.24159	0.23522	0.28084	0.27714	0.27574	0.31404	0.24552	0.28253	0.24765	0.24085	0.24194	0.24101	0.23867	0.24761	0.26483	0.28305	0.25882	0.26314	0.2863	0.2532	0.33282	0.27134	0.28308	0.28274	0.26259
287	0.24051	0.24376	0.24325	0.24114	0.23903	0.24464	0.24386	0.24639	0.24203	0.2454	0.24446	0.24283	0.24412	0.24642	0.2516	0.25164	0.24727	0.26929	0.25308	0.24359	0.26196	0.25813	0.2624	0.24909	0.25123	0.24384	0.30006	0.29531	0.29418	0.34537	0.25619	0.30216	0.25865	0.2504	0.2518	0.25052	0.24789	0.25866	0.27971	0.30241	0.27253	0.27785	0.30839	0.26519	0.36719	0.2885	0.30282	0.30237	0.27787
288	0.24877	0.25272	0.25219	0.24962	0.2471	0.25374	0.25297	0.25539	0.25006	0.25484	0.25369	0.25092	0.25325	0.25659	0.26284	0.26229	0.25712	0.28434	0.26427	0.2528	0.27498	0.27059	0.27563	0.25959	0.26202	0.25343	0.32357	0.31732	0.31685	0.38676	0.26831	0.32617	0.27118	0.26108	0.2629	0.26114	0.2582	0.27127	0.29727	0.32593	0.2886	0.29526	0.33636	0.27892	0.41172	0.3093	0.32697	0.32637	0.29623
289	0.25782	0.26263	0.26208	0.25894	0.25594	0.26381	0.26306	0.26529	0.2588	0.26535	0.26392	0.25974	0.26338	0.26806	0.27568	0.27426	0.26812	0.30206	0.27695	0.26302	0.28998	0.28496	0.29093	0.27145	0.27421	0.26417	0.35292	0.34448	0.34537	0.44263	0.28224	0.3561	0.28561	0.27316	0.27551	0.27312	0.26983	0.28582	0.31835	0.35503	0.30777	0.31623	0.37276	0.29484	0.47023	0.33501	0.35708	0.35628	0.31877
290	0.26781	0.27366	0.2731	0.26926	0.2657	0.27503	0.27433	0.27626	0.2684	0.27715	0.27537	0.2694	0.27469	0.28117	0.29052	0.28786	0.28053	0.32325	0.2915	0.27449	0.30748	0.30171	0.30883	0.28499	0.28813	0.27634	0.39032	0.37861	0.38211	0.51841	0.29845	0.39409	0.30245	0.28694	0.29003	0.28677	0.28309	0.30285	0.34405	0.39166	0.33102	0.34194	0.42124	0.31353	0.54691	0.36747	0.3953	0.39425	0.34706
291	0.27891	0.28604	0.28549	0.28079	0.27656	0.28764	0.28703	0.2885	0.27899	0.2905	0.28829	0.28006	0.28744	0.29633	0.3079	0.30346	0.29465	0.34897	0.30836	0.28746	0.32815	0.32151	0.33008	0.30062	0.30419	0.29029	0.43879	0.42217	0.43042	0.61775	0.31757	0.44302	0.32237	0.30284	0.30694	0.30249	0.2984	0.32305	0.37595	0.43839	0.35973	0.37406	0.48668	0.33574	0.64345	0.40925	0.44451	0.44315	0.38338
292	0.29136	0.30006	0.29954	0.29378	0.28874	0.30193	0.30148	0.30226	0.29077	0.30577	0.303	0.2919	0.30192	0.31409	0.32857	0.32152	0.31088	0.38066	0.32815	0.30228	0.35287	0.34525	0.35562	0.31889	0.32295	0.30647	0.50207	0.47823	0.49447	0.73409	0.34045	0.50628	0.34627	0.32141	0.3269	0.3208	0.3163	0.3474	0.41612	0.49823	0.3958	0.41485	0.57377	0.36247	0.75179	0.46374	0.50808	0.5064	0.43094
293	0.30543	0.31607	0.31563	0.30854	0.30254	0.31826	0.31807	0.31785	0.30396	0.3234	0.31991	0.30512	0.31855	0.3352	0.35347	0.34267	0.32973	0.42019	0.35164	0.3194	0.38278	0.37408	0.38669	0.34052	0.34511	0.32548	0.58333	0.5498	0.5778	0.84079	0.3682	0.58647	0.37534	0.34335	0.3508	0.34238	0.33748	0.37717	0.46717	0.57359	0.44171	0.46718	0.6816	0.39503	0.84729	0.53468	0.58854	0.58664	0.49379
294	0.32147	0.33453	0.33423	0.32547	0.3183	0.3371	0.33732	0.33562	0.31884	0.34396	0.33954	0.32	0.33781	0.36066	0.38391	0.36766	0.35186	0.4698	0.37984	0.33937	0.41931	0.40949	0.42485	0.36644	0.3716	0.34812	0.68099	0.63729	0.67863	0.90274	0.40228	0.68151	0.41115	0.36957	0.3798	0.3681	0.36291	0.41402	0.53176	0.66308	0.50035	0.5339	0.79347	0.43496	0.90075	0.62379	0.68364	0.6818	0.57551
295	0.33994	0.356	0.35594	0.34507	0.3365	0.35902	0.35985	0.35602	0.33575	0.36817	0.36255	0.33686	0.36034	0.3918	0.4215	0.39745	0.37807	0.5316	0.41399	0.36294	0.46407	0.45325	0.47185	0.39786	0.40358	0.37545	0.78134	0.73319	0.78178	0.91013	0.44446	0.77811	0.45557	0.40122	0.41537	0.39907	0.39379	0.45996	0.6108	0.75603	0.57385	0.61582	0.87608	0.48397	0.90538	0.72477	0.77986	0.77857	0.67466
296	0.36137	0.38118	0.3815	0.36798	0.35772	0.38473	0.38647	0.37957	0.35512	0.39692	0.38973	0.35609	0.3869	0.43027	0.4681	0.43311	0.40935	0.60601	0.45551	0.39099	0.51849	0.50708	0.52917	0.43619	0.4424	0.40879	0.85776	0.81784	0.8589	0.88109	0.4966	0.85162	0.51049	0.43964	0.45925	0.43656	0.43161	0.51688	0.69955	0.83114	0.66043	0.70713	0.90606	0.54324	0.87702	0.81704	0.85255	0.8522	0.77676
297	0.38643	0.41088	0.41177	0.39495	0.38268	0.41503	0.41808	0.40685	0.37743	0.4312	0.42201	0.37812	0.41838	0.47794	0.52534	0.47575	0.44679	0.68854	0.50569	0.42459	0.58283	0.57171	0.59677	0.48297	0.48946	0.44972	0.88947	0.86805	0.88942	0.8343	0.55982	0.88288	0.57678	0.4862	0.51305	0.48194	0.478	0.58534	0.7833	0.86899	0.74941	0.79125	0.89081	0.61212	0.83189	0.87363	0.88295	0.88347	0.85373
298	0.41591	0.44596	0.44769	0.42684	0.41223	0.45079	0.45565	0.43843	0.40324	0.47202	0.46034	0.40347	0.45572	0.53631	0.5932	0.52605	0.49136	0.7666	0.56494	0.46487	0.65421	0.64481	0.67084	0.53918	0.54558	0.49977	0.87933	0.87607	0.87779	0.77931	0.63263	0.87403	0.652	0.54172	0.57717	0.53604	0.53413	0.66198	0.84115	0.86766	0.82048	0.84643	0.8505	0.68569	0.7788	0.88413	0.87354	0.87458	0.88443
299	0.45062	0.48718	0.49006	0.46453	0.44729	0.4927	0.49997	0.47474	0.43311	0.52001	0.50544	0.43263	0.49964	0.60496	0.6676	0.58348	0.54341	0.8223	0.63126	0.51267	0.72444	0.71836	0.74154	0.60402	0.60975	0.55958	0.84358	0.85235	0.84097	0.7208	0.70806	0.83985	0.72747	0.6053	0.64874	0.59816	0.59944	0.73665	0.86088	0.8392	0.85567	0.86206	0.79835	0.7532	0.72229	0.86005	0.83912	0.84038	0.87272
300	0.4912	0.53475	0.53906	0.50856	0.48864	0.54086	0.55105	0.5158	0.46753	0.57468	0.55719	0.466	0.55015	0.67889	0.7381	0.64495	0.60166	0.84405	0.69836	0.56782	0.78068	0.77875	0.79477	0.67284	0.67725	0.62717	0.79484	0.81065	0.79147	0.66115	0.77275	0.79246	0.78839	0.6724	0.7192	0.66421	0.66938	0.79392	0.84705	0.79572	0.85331	0.84481	0.74071	0.80097	0.66467	0.81703	0.79164	0.79297	0.83552
301	0.53772	0.58757	0.59341	0.55863	0.53642	0.594	0.60716	0.56083	0.50659	0.63324	0.61366	0.50365	0.60559	0.74666	0.79011	0.70371	0.66186	0.83412	0.7554	0.62785	0.8116	0.81311	0.81995	0.73583	0.73853	0.69573	0.7398	0.75972	0.7358	0.60149	0.8125	0.73853	0.82135	0.73377	0.77516	0.72551	0.7339	0.82178	0.8119	0.7445	0.8246	0.80743	0.68084	0.82037	0.60707	0.7646	0.7377	0.73902	0.78552
302	0.58889	0.64226	0.64924	0.61257	0.58929	0.64848	0.66373	0.60758	0.54966	0.68961	0.66998	0.545	0.66156	0.79377	0.81345	0.75034	0.71623	0.80257	0.79134	0.68672	0.81447	0.81779	0.81661	0.78075	0.78191	0.75342	0.68193	0.70428	0.67736	0.54239	0.82164	0.68161	0.8234	0.77789	0.80524	0.77082	0.7802	0.81943	0.76501	0.68955	0.78091	0.75915	0.62036	0.81268	0.55004	0.70765	0.68081	0.68209	0.72925
303	0.64128	0.69275	0.69988	0.66561	0.64348	0.69807	0.71334	0.65221	0.59481	0.73524	0.71859	0.58837	0.71094	0.81131	0.80796	0.77675	0.75563	0.7585	0.801	0.73543	0.79436	0.79802	0.79146	0.79956	0.79977	0.78848	0.62312	0.64694	0.61797	0.48416	0.80451	0.62362	0.80091	0.79697	0.8067	0.79201	0.79974	0.79417	0.7121	0.63309	0.72939	0.70532	0.56009	0.78504	0.49383	0.64885	0.62288	0.62409	0.67019
304	0.68885	0.73137	0.73724	0.7105	0.69233	0.73515	0.74772	0.68951	0.63844	0.7623	0.75137	0.63064	0.74567	0.80093	0.78112	0.78029	0.77363	0.70764	0.7872	0.76522	0.75909	0.7623	0.75264	0.79265	0.79258	0.79593	0.56426	0.58902	0.55853	0.42703	0.76995	0.56553	0.76293	0.79105	0.78528	0.78838	0.79292	0.75475	0.65624	0.57624	0.67392	0.64882	0.50046	0.74504	0.43857	0.58952	0.56485	0.56599	0.6101
305	0.72439	0.75211	0.75558	0.73998	0.72805	0.75406	0.76181	0.71452	0.67557	0.76777	0.76367	0.66733	0.76062	0.77063	0.74092	0.76409	0.76984	0.65323	0.75663	0.77235	0.71467	0.7171	0.70581	0.76634	0.76639	0.77953	0.50586	0.53124	0.49953	0.37128	0.72506	0.50786	0.71598	0.76591	0.74883	0.76519	0.76631	0.70712	0.59912	0.51964	0.61662	0.59122	0.44178	0.69779	0.38445	0.53038	0.50725	0.50831	0.54991
306	0.74234	0.753	0.75364	0.74992	0.74496	0.75328	0.75547	0.72426	0.70116	0.75365	0.75579	0.69379	0.75536	0.72815	0.693	0.73352	0.74815	0.59719	0.71546	0.75872	0.66506	0.66658	0.65455	0.72743	0.72779	0.74642	0.44824	0.47403	0.44134	0.31747	0.67441	0.45093	0.66412	0.72811	0.70344	0.72886	0.72701	0.65499	0.54174	0.46364	0.55873	0.53345	0.38438	0.64657	0.33181	0.47187	0.4504	0.45136	0.49017
307	0.74131	0.73653	0.73461	0.74097	0.7421	0.73554	0.73271	0.71873	0.71198	0.72493	0.73187	0.70666	0.7336	0.67864	0.64069	0.69361	0.71401	0.54056	0.66796	0.72969	0.61257	0.61313	0.60093	0.68095	0.68168	0.70304	0.39172	0.4177	0.38431	0.26655	0.62059	0.39507	0.60962	0.68259	0.65285	0.68446	0.68012	0.60046	0.48463	0.40854	0.50092	0.476	0.32884	0.59323	0.2814	0.41433	0.39461	0.39547	0.4313
308	0.72366	0.70701	0.70305	0.71683	0.72241	0.70518	0.69832	0.70009	0.70757	0.68639	0.69671	0.705	0.70004	0.62518	0.58602	0.6479	0.67185	0.48399	0.61679	0.69043	0.55864	0.55824	0.5462	0.63006	0.6312	0.65361	0.33681	0.36266	0.32906	0.21996	0.5652	0.34073	0.55387	0.63254	0.59939	0.63526	0.62885	0.54481	0.42818	0.35471	0.44365	0.4193	0.27612	0.53895	0.23443	0.35823	0.34034	0.34108	0.37375
309	0.69346	0.66858	0.6631	0.68189	0.69035	0.66623	0.65633	0.67138	0.68978	0.64163	0.65423	0.69008	0.65869	0.56962	0.53025	0.59871	0.62471	0.42795	0.56364	0.64476	0.50414	0.50281	0.49116	0.57671	0.57826	0.60071	0.28436	0.30957	0.27654	0.17938	0.50921	0.2887	0.49774	0.57994	0.54448	0.58332	0.57515	0.48885	0.37283	0.30283	0.38737	0.36381	0.22765	0.48442	0.1925	0.3043	0.28838	0.289	0.31825
310	0.65463	0.62434	0.61776	0.63978	0.64995	0.6217	0.60954	0.63544	0.66151	0.59302	0.60715	0.66447	0.6124	0.51311	0.47418	0.54754	0.57459	0.37293	0.50954	0.5952	0.44968	0.44748	0.43634	0.52212	0.52409	0.54593	0.23571	0.25948	0.22822	0.1462	0.45328	0.24023	0.44181	0.52604	0.48901	0.52995	0.52024	0.43315	0.31922	0.25395	0.3327	0.31027	0.1852	0.43017	0.1572	0.25373	0.23997	0.24045	0.2659
311	0.61018	0.57646	0.56906	0.59311	0.60421	0.57369	0.55982	0.59455	0.62568	0.54214	0.55727	0.63091	0.56308	0.45644	0.41844	0.49534	0.52279	0.3196	0.4552	0.54336	0.39575	0.39278	0.38226	0.46712	0.46947	0.49032	0.19256	0.21388	0.18586	0.12085	0.39795	0.19693	0.38661	0.47164	0.43362	0.47597	0.46494	0.37825	0.26838	0.20957	0.28059	0.25978	0.1503	0.37667	0.12941	0.20809	0.19673	0.19708	0.21829
312	0.56214	0.52635	0.51835	0.54359	0.55509	0.52355	0.50839	0.55035	0.5846	0.49002	0.50578	0.59173	0.51197	0.40025	0.36365	0.44281	0.47016	0.269	0.4012	0.4903	0.34295	0.33934	0.32954	0.41232	0.41502	0.43462	0.15653	0.17448	0.15098	0.10262	0.34388	0.16043	0.33282	0.41737	0.37893	0.42203	0.40991	0.32488	0.22177	0.17134	0.23245	0.21392	0.12354	0.32458	0.10891	0.16913	0.16029	0.16052	0.17719
313	0.51189	0.47501	0.46657	0.49239	0.50395	0.47223	0.45614	0.50399	0.53999	0.43742	0.45352	0.5487	0.45998	0.34529	0.31066	0.39053	0.41741	0.22259	0.34818	0.43683	0.29212	0.28809	0.27916	0.35841	0.36137	0.37953	0.12846	0.14257	0.12422	0.090085	0.29197	0.13169	0.28143	0.36388	0.32569	0.36876	0.35582	0.27409	0.18113	0.14049	0.19	0.17441	0.10428	0.27485	0.094544	0.13803	0.1316	0.13173	0.144
314	0.46041	0.42319	0.41448	0.4404	0.45177	0.4205	0.40378	0.45635	0.49307	0.38505	0.40122	0.50309	0.40781	0.29259	0.26069	0.33918	0.36519	0.18208	0.29706	0.38366	0.24454	0.24037	0.23249	0.30627	0.30938	0.32592	0.10796	0.11841	0.1049	0.081759	0.24356	0.11047	0.23387	0.31198	0.27501	0.31695	0.30361	0.22735	0.14785	0.11716	0.15478	0.1425	0.091034	0.22888	0.084857	0.11481	0.11041	0.11048	0.11897
315	0.40855	0.37164	0.36281	0.38839	0.39938	0.36906	0.35208	0.40813	0.4448	0.33367	0.34961	0.45589	0.35621	0.24356	0.21531	0.28971	0.31436	0.14886	0.24908	0.3316	0.2018	0.19781	0.19116	0.25715	0.26023	0.27494	0.09374	0.10116	0.091631	0.076442	0.20029	0.095625	0.19182	0.26285	0.22835	0.26774	0.25455	0.18636	0.1224	0.10053	0.12749	0.11843	0.082254	0.18829	0.078561	0.098449	0.095589	0.095611	0.1012
316	0.35712	0.32121	0.31249	0.33722	0.34766	0.31878	0.30197	0.36005	0.396	0.28433	0.29966	0.40791	0.3061	0.19991	0.1762	0.24339	0.26606	0.12342	0.20584	0.28175	0.16549	0.16197	0.15668	0.21263	0.21549	0.22811	0.084237	0.089395	0.082824	0.073264	0.16377	0.085635	0.15681	0.218	0.18742	0.22261	0.21025	0.15256	0.10411	0.089165	0.10767	0.10131	0.076637	0.15453	0.07468	0.087383	0.085617	0.08561	0.089134
317	0.30711	0.27304	0.26471	0.28796	0.29768	0.27079	0.25473	0.31293	0.34752	0.2384	0.25261	0.35995	0.2587	0.16327	0.14463	0.20179	0.22176	0.10509	0.16896	0.23553	0.13661	0.13376	0.12978	0.17438	0.17684	0.18717	0.078102	0.08163	0.077186	0.071619	0.13495	0.079141	0.12959	0.17911	0.15366	0.18322	0.17238	0.12653	0.091564	0.081668	0.093963	0.08966	0.073257	0.12827	0.072526	0.080144	0.079134	0.07911	0.081204
318	0.25981	0.22857	0.22097	0.24202	0.25079	0.22657	0.21192	0.26786	0.30035	0.19749	0.21005	0.31293	0.21554	0.13456	0.1208	0.16646	0.18311	0.092495	0.13951	0.1946	0.1151	0.11294	0.11009	0.14359	0.14553	0.15354	0.074353	0.076715	0.073792	0.071072	0.11365	0.07513	0.10975	0.14746	0.12763	0.1509	0.14204	0.10768	0.083245	0.07693	0.084825	0.081988	0.071475	0.10909	0.071615	0.075612	0.075131	0.075095	0.076193
319	0.21678	0.18945	0.18291	0.20102	0.20863	0.18773	0.17514	0.2262	0.25576	0.16311	0.17356	0.26801	0.17824	0.11348	0.10384	0.13834	0.15141	0.084137	0.11749	0.16045	0.099926	0.09836	0.09638	0.12042	0.12183	0.12774	0.072306	0.073832	0.072002	0.071315	0.098736	0.072892	0.095979	0.12337	0.10878	0.1261	0.11932	0.094669	0.077943	0.074166	0.078946	0.077146	0.070837	0.095752	0.071596	0.073008	0.072898	0.072854	0.073253
320	0.17963	0.15702	0.15175	0.16645	0.17273	0.15562	0.14547	0.18944	0.21523	0.13601	0.14418	0.22661	0.14794	0.098794	0.092273	0.11732	0.12704	0.078816	0.1019	0.13375	0.089651	0.088547	0.087191	0.10392	0.10488	0.1091	0.071481	0.072407	0.071361	0.072124	0.088692	0.071928	0.086782	0.10607	0.095755	0.10817	0.1032	0.086012	0.074793	0.072822	0.07539	0.074326	0.071019	0.086823	0.072218	0.071785	0.071939	0.07189	0.071793
321	0.1495	0.13184	0.12786	0.13912	0.14407	0.13074	0.12304	0.1588	0.18022	0.11598	0.12203	0.19019	0.12489	0.088969	0.084681	0.10245	0.1094	0.07565	0.091333	0.11416	0.082952	0.082188	0.08127	0.09271	0.09331	0.096289	0.071528	0.072022	0.071539	0.073336	0.082178	0.071873	0.08087	0.094218	0.087098	0.095812	0.092274	0.080477	0.073176	0.072491	0.073483	0.072943	0.071785	0.08108	0.073297	0.071547	0.071887	0.071834	0.071388
322	0.1266	0.11345	0.11059	0.11886	0.12261	0.11261	0.10703	0.1348	0.15175	0.10193	0.10625	0.15995	0.10834	0.082634	0.079914	0.092362	0.097233	0.074022	0.084436	0.10051	0.078804	0.078286	0.077675	0.085361	0.085704	0.087813	0.072197	0.072381	0.072302	0.074836	0.07817	0.072469	0.077289	0.086401	0.081568	0.087615	0.08513	0.077162	0.072654	0.072888	0.072757	0.072591	0.072967	0.077609	0.074704	0.072012	0.072484	0.072429	0.071734
323	0.11019	0.10068	0.098706	0.10461	0.10742	0.10004	0.096104	0.11708	0.12998	0.092475	0.095499	0.13635	0.097002	0.078765	0.077149	0.085784	0.089162	0.073494	0.080151	0.091381	0.076473	0.076133	0.07574	0.080764	0.080922	0.082427	0.073309	0.073271	0.073481	0.076542	0.075944	0.073528	0.075367	0.081465	0.078259	0.082403	0.080676	0.075429	0.072916	0.073803	0.072872	0.072973	0.074446	0.07576	0.076345	0.072979	0.073544	0.073488	0.072617
324	0.098964	0.092163	0.090837	0.095022	0.097134	0.091676	0.088939	0.10464	0.11427	0.086364	0.088456	0.11899	0.089533	0.076644	0.075812	0.081715	0.084037	0.073749	0.077726	0.085515	0.07544	0.075229	0.074989	0.07812	0.078145	0.079228	0.074738	0.074539	0.074957	0.078393	0.07499	0.074918	0.074628	0.078577	0.076531	0.079315	0.078133	0.074824	0.073736	0.075089	0.073587	0.073878	0.076137	0.075071	0.078153	0.074303	0.074935	0.074878	0.073881
325	0.091586	0.086723	0.085858	0.088819	0.090438	0.086339	0.084464	0.096265	0.10345	0.082638	0.084067	0.10685	0.08484	0.075769	0.075492	0.079438	0.081012	0.074564	0.076629	0.081969	0.075335	0.075216	0.075086	0.076868	0.076798	0.077586	0.076392	0.076078	0.076644	0.080349	0.074942	0.076543	0.074735	0.07715	0.075931	0.077743	0.076954	0.075025	0.074954	0.076639	0.07473	0.075157	0.077976	0.075209	0.08008	0.07588	0.076561	0.076504	0.075416
326	0.086968	0.083478	0.082943	0.085036	0.08631	0.083167	0.081908	0.090882	0.096306	0.080614	0.081572	0.098705	0.082127	0.075783	0.075898	0.078445	0.079487	0.075778	0.07648	0.080078	0.075892	0.07584	0.075787	0.076612	0.076473	0.077053	0.078205	0.077808	0.078481	0.08238	0.075541	0.078336	0.075444	0.076767	0.076137	0.077255	0.076748	0.0758	0.076455	0.078378	0.076178	0.076701	0.079922	0.07594	0.082094	0.077639	0.078355	0.078297	0.077144
327	0.084328	0.081809	0.081509	0.082987	0.084019	0.08155	0.080729	0.087668	0.091839	0.079812	0.080436	0.093509	0.080836	0.07643	0.076823	0.078373	0.07904	0.077277	0.077011	0.079372	0.076924	0.076918	0.076921	0.077066	0.076879	0.077313	0.080134	0.079677	0.080425	0.084465	0.076603	0.080249	0.076584	0.077132	0.076919	0.077543	0.077238	0.076987	0.07816	0.080253	0.077844	0.078436	0.081945	0.077096	0.084171	0.079527	0.080268	0.080211	0.079009
328	0.083083	0.081252	0.081119	0.082163	0.083025	0.08103	0.080521	0.086	0.089286	0.079873	0.080258	0.090431	0.080549	0.077523	0.078112	0.078951	0.079351	0.078977	0.07802	0.079503	0.07829	0.078317	0.078359	0.078021	0.077799	0.07813	0.082144	0.081642	0.082445	0.086593	0.07799	0.082247	0.078027	0.078022	0.078107	0.078379	0.078217	0.078463	0.080008	0.082224	0.079663	0.080305	0.084022	0.078549	0.086296	0.081505	0.082267	0.08221	0.080971
329	0.082828	0.081485	0.081471	0.082206	0.082948	0.081289	0.081002	0.085434	0.088095	0.080544	0.080761	0.088865	0.080973	0.078931	0.079659	0.079991	0.080202	0.080819	0.079367	0.080224	0.079893	0.079944	0.080014	0.07933	0.079085	0.079341	0.084212	0.083677	0.08452	0.088752	0.079608	0.084307	0.079686	0.079286	0.079582	0.079602	0.079543	0.080144	0.081957	0.084264	0.08159	0.082269	0.086141	0.080215	0.088457	0.083549	0.084327	0.084271	0.083001
330	0.083277	0.08228	0.082349	0.082866	0.083523	0.082101	0.081972	0.085657	0.087875	0.08165	0.081746	0.088375	0.081903	0.080562	0.08139	0.081359	0.081435	0.082762	0.080956	0.081366	0.081666	0.081731	0.081823	0.080891	0.080629	0.080831	0.086323	0.085764	0.086635	0.090938	0.08139	0.086413	0.081497	0.080814	0.08126	0.081102	0.081115	0.081971	0.083979	0.086355	0.083596	0.084301	0.08829	0.082033	0.09065	0.085641	0.086434	0.086377	0.08508
331	0.084226	0.083474	0.083603	0.083965	0.084562	0.083309	0.083291	0.086443	0.088348	0.083066	0.083077	0.088655	0.083194	0.082352	0.083251	0.082962	0.082941	0.084779	0.082717	0.082808	0.083559	0.083635	0.083743	0.082632	0.082358	0.08252	0.088469	0.087889	0.088783	0.093149	0.083289	0.088554	0.083417	0.082531	0.083085	0.082798	0.082863	0.083902	0.086055	0.088487	0.085658	0.086384	0.090466	0.083958	0.09287	0.087768	0.088575	0.088519	0.087197
332	0.085541	0.084961	0.085131	0.085384	0.085939	0.084805	0.084865	0.08764	0.089327	0.084707	0.084659	0.089498	0.084747	0.084259	0.085209	0.084737	0.084647	0.086852	0.084604	0.084468	0.085541	0.085623	0.085744	0.084504	0.084223	0.084355	0.090643	0.090046	0.090957	0.095383	0.085274	0.090724	0.085419	0.084387	0.085017	0.084639	0.084739	0.085911	0.088173	0.09065	0.087764	0.088506	0.092665	0.085965	0.095116	0.089926	0.090746	0.09069	0.089344
333	0.087101	0.086645	0.086844	0.08702	0.087543	0.086496	0.086612	0.089118	0.090647	0.086503	0.086411	0.090722	0.08648	0.086245	0.087233	0.086629	0.086489	0.088964	0.086578	0.086276	0.087586	0.087671	0.087803	0.086465	0.08618	0.086288	0.09284	0.092229	0.093154	0.097639	0.087319	0.092919	0.087477	0.086337	0.087022	0.086579	0.086704	0.087974	0.090321	0.09284	0.089902	0.090658	0.094885	0.088028	0.097387	0.092107	0.092941	0.092885	0.091515
334	0.088836	0.088469	0.08869	0.088808	0.089309	0.088326	0.088481	0.090795	0.092211	0.088408	0.088285	0.092216	0.088339	0.088288	0.089305	0.088607	0.088429	0.091107	0.088614	0.08819	0.089677	0.089764	0.089904	0.088491	0.088204	0.088292	0.095059	0.094434	0.095372	0.099919	0.089408	0.095136	0.089576	0.088355	0.089082	0.08859	0.088732	0.090078	0.092496	0.095054	0.092066	0.092835	0.097126	0.090133	0.099684	0.094309	0.095159	0.095104	0.093706
335	0.090698	0.090397	0.090633	0.09071	0.091193	0.090259	0.090441	0.092619	0.093953	0.090395	0.090248	0.093909	0.090292	0.090375	0.091415	0.090647	0.090441	0.093276	0.090698	0.090182	0.091805	0.091891	0.09204	0.090567	0.090279	0.090349	0.0973	0.096662	0.097611	0.10222	0.091533	0.097376	0.091709	0.090426	0.091182	0.090654	0.090808	0.092215	0.094694	0.097292	0.094254	0.095035	0.099389	0.092273	0.10201	0.096532	0.097399	0.097344	0.095918
336	0.092656	0.092403	0.092649	0.092695	0.093165	0.092268	0.09247	0.094553	0.095827	0.092443	0.09228	0.095747	0.092315	0.092497	0.093556	0.092738	0.092508	0.095469	0.09282	0.092233	0.093963	0.094047	0.094204	0.092681	0.092393	0.092448	0.099564	0.098912	0.099873	0.10456	0.093686	0.099638	0.09387	0.092536	0.093316	0.092761	0.092922	0.094379	0.096914	0.099553	0.096463	0.097256	0.10168	0.094442	0.10436	0.098777	0.099663	0.099607	0.098149
337	0.094681	0.094465	0.094719	0.094741	0.095201	0.094333	0.094549	0.096566	0.097794	0.094537	0.094361	0.09769	0.094391	0.094645	0.095722	0.094866	0.094617	0.097684	0.094972	0.094329	0.096148	0.096229	0.096393	0.094826	0.094539	0.094578	0.10185	0.10119	0.10216	0.10692	0.095863	0.10192	0.096055	0.094678	0.095478	0.094901	0.095067	0.096566	0.099157	0.10184	0.098694	0.099499	0.10399	0.096635	0.10675	0.10104	0.10195	0.10189	0.1004
338	0.096762	0.096574	0.096833	0.096837	0.097288	0.096444	0.09667	0.098642	0.099837	0.09667	0.096483	0.099716	0.096508	0.096819	0.097912	0.097026	0.096761	0.099921	0.097152	0.096461	0.098356	0.098433	0.098606	0.096997	0.096712	0.096736	0.10416	0.10348	0.10447	0.10932	0.098064	0.10424	0.098263	0.096849	0.097664	0.09707	0.097238	0.098777	0.10142	0.10415	0.10095	0.10177	0.10633	0.098853	0.10917	0.10333	0.10426	0.10421	0.10268
339	0.098887	0.098721	0.098984	0.098974	0.099418	0.098593	0.098826	0.10077	0.10194	0.098835	0.09864	0.10181	0.098663	0.099015	0.10012	0.099217	0.098937	0.10218	0.099356	0.098625	0.10059	0.10066	0.10084	0.099194	0.09891	0.09892	0.10651	0.10581	0.10681	0.11175	0.10029	0.10658	0.10049	0.099045	0.099875	0.099266	0.099434	0.10101	0.10371	0.10649	0.10322	0.10406	0.1087	0.1011	0.11164	0.10565	0.10661	0.10655	0.10498
340	0.10104	0.1009	0.10116	0.10114	0.10158	0.10077	0.10101	0.10294	0.10409	0.10103	0.10082	0.10394	0.10084	0.10123	0.10236	0.10143	0.10114	0.10447	0.10158	0.10081	0.10284	0.10291	0.1031	0.10141	0.10113	0.10112	0.10888	0.10816	0.10917	0.11423	0.10253	0.10895	0.10275	0.10126	0.10211	0.10148	0.10165	0.10327	0.10603	0.10887	0.10552	0.10637	0.1111	0.10336	0.11414	0.108	0.10898	0.10892	0.1073
341	0.10323	0.1031	0.10337	0.10334	0.10377	0.10298	0.10322	0.10514	0.10627	0.10324	0.10304	0.10612	0.10305	0.10347	0.10462	0.10367	0.10336	0.10678	0.10383	0.10303	0.10513	0.10519	0.10539	0.10365	0.10338	0.10335	0.11128	0.11055	0.11158	0.11675	0.1048	0.11136	0.10502	0.10351	0.10436	0.10373	0.10389	0.10555	0.10837	0.11127	0.10785	0.10872	0.11354	0.10565	0.1167	0.11037	0.11139	0.11133	0.10965
342	0.10545	0.10533	0.1056	0.10556	0.10598	0.10521	0.10545	0.10738	0.10849	0.10549	0.10527	0.10833	0.10529	0.10573	0.1069	0.10594	0.10561	0.10911	0.10611	0.10527	0.10743	0.10748	0.1077	0.10592	0.10564	0.1056	0.11373	0.11297	0.11401	0.11931	0.10709	0.1138	0.10732	0.10577	0.10664	0.10599	0.10616	0.10785	0.11075	0.11372	0.11021	0.11109	0.11602	0.10797	0.11931	0.11278	0.11383	0.11377	0.11204
343	0.10769	0.10759	0.10786	0.1078	0.10822	0.10747	0.10771	0.10964	0.11073	0.10775	0.10753	0.11058	0.10754	0.10802	0.1092	0.10823	0.10789	0.11148	0.10841	0.10753	0.10977	0.10981	0.11004	0.10821	0.10794	0.10787	0.11621	0.11543	0.11649	0.12193	0.10941	0.11628	0.10965	0.10806	0.10895	0.10829	0.10844	0.11019	0.11316	0.1162	0.1126	0.1135	0.11855	0.11032	0.12197	0.11523	0.11631	0.11626	0.11446
344	0.10995	0.10987	0.11014	0.11008	0.11049	0.10975	0.11	0.11193	0.11301	0.11005	0.10982	0.11286	0.10983	0.11033	0.11153	0.11055	0.11019	0.11388	0.11074	0.10982	0.11213	0.11217	0.1124	0.11052	0.11026	0.11017	0.11874	0.11794	0.11901	0.12461	0.11176	0.11881	0.11201	0.11038	0.11128	0.1106	0.11076	0.11255	0.1156	0.11873	0.11502	0.11595	0.12112	0.11269	0.1247	0.11772	0.11884	0.11879	0.11692
345	0.11225	0.11218	0.11246	0.11238	0.11278	0.11207	0.11231	0.11426	0.11532	0.11237	0.11213	0.11517	0.11214	0.11267	0.1139	0.1129	0.11252	0.11632	0.1131	0.11213	0.11453	0.11456	0.11481	0.11287	0.11261	0.1125	0.12132	0.12049	0.12159	0.12736	0.11414	0.12139	0.1144	0.11273	0.11364	0.11295	0.1131	0.11495	0.11809	0.12131	0.11749	0.11844	0.12375	0.11511	0.1275	0.12025	0.12142	0.12137	0.11942
346	0.11457	0.11452	0.1148	0.11471	0.11511	0.11441	0.11466	0.11662	0.11767	0.11472	0.11448	0.11751	0.11449	0.11504	0.1163	0.11528	0.11488	0.1188	0.11549	0.11448	0.11697	0.11698	0.11725	0.11525	0.11499	0.11485	0.12395	0.12309	0.12421	0.13018	0.11656	0.12402	0.11683	0.1151	0.11604	0.11534	0.11548	0.11738	0.12063	0.12395	0.11999	0.12097	0.12644	0.11756	0.13037	0.12284	0.12406	0.124	0.12197
347	0.11693	0.11689	0.11717	0.11707	0.11746	0.11678	0.11703	0.11902	0.12004	0.11711	0.11686	0.11989	0.11686	0.11744	0.11873	0.11769	0.11728	0.12132	0.11791	0.11685	0.11944	0.11944	0.11973	0.11766	0.1174	0.11724	0.12664	0.12574	0.12689	0.13307	0.11901	0.12671	0.1193	0.11752	0.11847	0.11775	0.11789	0.11985	0.12321	0.12664	0.12255	0.12356	0.12919	0.12005	0.13334	0.12547	0.12675	0.1267	0.12457
348	0.11931	0.1193	0.11958	0.11947	0.11985	0.11919	0.11944	0.12145	0.12246	0.11953	0.11927	0.1223	0.11927	0.11988	0.1212	0.12015	0.11971	0.12389	0.12038	0.11927	0.12196	0.12195	0.12225	0.12011	0.11986	0.11966	0.1294	0.12846	0.12964	0.13606	0.1215	0.12946	0.12181	0.11997	0.12094	0.1202	0.12034	0.12237	0.12584	0.1294	0.12515	0.12619	0.13202	0.12259	0.13639	0.12817	0.12951	0.12945	0.12722
349	0.12174	0.12174	0.12203	0.1219	0.12227	0.12164	0.12189	0.12392	0.12491	0.12198	0.12172	0.12475	0.12172	0.12236	0.12372	0.12264	0.12218	0.12651	0.12289	0.12171	0.12452	0.1245	0.12482	0.1226	0.12235	0.12212	0.13222	0.13125	0.13246	0.13914	0.12404	0.13229	0.12436	0.12246	0.12345	0.1227	0.12282	0.12493	0.12854	0.13223	0.12781	0.12889	0.13493	0.12517	0.13956	0.13093	0.13234	0.13229	0.12994
350	0.1242	0.12423	0.12451	0.12436	0.12472	0.12413	0.12438	0.12643	0.1274	0.12448	0.1242	0.12724	0.1242	0.12488	0.12628	0.12518	0.12469	0.12919	0.12544	0.1242	0.12714	0.1271	0.12745	0.12513	0.12489	0.12462	0.13513	0.13411	0.13535	0.14233	0.12662	0.1352	0.12696	0.12499	0.12601	0.12524	0.12535	0.12754	0.1313	0.13514	0.13053	0.13165	0.13792	0.12781	0.14284	0.13377	0.13525	0.13519	0.13272
351	0.12669	0.12675	0.12703	0.12687	0.12722	0.12665	0.12691	0.12899	0.12992	0.12702	0.12673	0.12977	0.12673	0.12744	0.12889	0.12777	0.12724	0.13193	0.12804	0.12673	0.12981	0.12975	0.13012	0.12771	0.12748	0.12717	0.13812	0.13705	0.13833	0.14564	0.12926	0.13818	0.12962	0.12757	0.12862	0.12782	0.12793	0.13021	0.13412	0.13813	0.13331	0.13448	0.141	0.1305	0.14624	0.13668	0.13824	0.13818	0.13557
352	0.12924	0.12932	0.12961	0.12942	0.12976	0.12923	0.12948	0.13159	0.1325	0.12961	0.12931	0.13235	0.1293	0.13006	0.13155	0.13041	0.12985	0.13473	0.1307	0.12931	0.13254	0.13246	0.13286	0.13034	0.13011	0.12976	0.1412	0.14007	0.1414	0.14908	0.13195	0.14127	0.13234	0.13021	0.13128	0.13046	0.13056	0.13293	0.13703	0.14121	0.13617	0.13738	0.14419	0.13326	0.14979	0.13967	0.14133	0.14127	0.1385
353	0.13182	0.13194	0.13223	0.13202	0.13234	0.13185	0.13211	0.13425	0.13512	0.13225	0.13193	0.13498	0.13193	0.13273	0.13427	0.1331	0.13251	0.13761	0.13341	0.13193	0.13533	0.13524	0.13567	0.13302	0.13281	0.1324	0.14439	0.1432	0.14457	0.15266	0.13471	0.14445	0.13512	0.13289	0.134	0.13315	0.13324	0.13572	0.14002	0.1444	0.1391	0.14037	0.1475	0.13609	0.1535	0.14276	0.14452	0.14446	0.14152
354	0.13446	0.13461	0.1349	0.13467	0.13498	0.13453	0.13478	0.13696	0.1378	0.13494	0.13461	0.13766	0.1346	0.13546	0.13706	0.13585	0.13522	0.14057	0.13618	0.13461	0.1382	0.13808	0.13854	0.13576	0.13556	0.1351	0.14769	0.14643	0.14786	0.15641	0.13753	0.14775	0.13797	0.13564	0.13678	0.1359	0.13598	0.13859	0.14309	0.14771	0.14212	0.14345	0.15094	0.13899	0.15739	0.14595	0.14782	0.14777	0.14463
355	0.13715	0.13734	0.13763	0.13738	0.13766	0.13727	0.13752	0.13974	0.14053	0.1377	0.13735	0.14039	0.13734	0.13825	0.13991	0.13867	0.138	0.14362	0.13903	0.13735	0.14114	0.141	0.1415	0.13857	0.13838	0.13786	0.15113	0.14978	0.15127	0.16036	0.14043	0.15118	0.14089	0.13846	0.13964	0.13872	0.13878	0.14152	0.14627	0.15114	0.14524	0.14663	0.15452	0.14197	0.16148	0.14926	0.15125	0.1512	0.14784
356	0.13991	0.14013	0.14043	0.14014	0.14041	0.14006	0.14032	0.14257	0.14333	0.14052	0.14016	0.14319	0.14014	0.14111	0.14284	0.14157	0.14084	0.14676	0.14194	0.14015	0.14417	0.144	0.14454	0.14146	0.14128	0.14068	0.1547	0.15326	0.15482	0.16451	0.1434	0.15475	0.1439	0.14134	0.14256	0.14161	0.14166	0.14455	0.14956	0.15471	0.14846	0.14992	0.15827	0.14504	0.16581	0.15269	0.15483	0.15478	0.15118
357	0.14272	0.14299	0.14329	0.14297	0.14322	0.14293	0.14319	0.14548	0.14618	0.14341	0.14303	0.14605	0.143	0.14405	0.14585	0.14454	0.14376	0.15001	0.14494	0.14302	0.14729	0.14709	0.14768	0.14441	0.14425	0.14358	0.15843	0.15688	0.15853	0.16891	0.14647	0.15848	0.147	0.14431	0.14557	0.14458	0.14461	0.14766	0.15298	0.15844	0.15179	0.15334	0.1622	0.14821	0.1704	0.15627	0.15856	0.15851	0.15464
358	0.1456	0.14592	0.14622	0.14587	0.14609	0.14587	0.14613	0.14847	0.14911	0.14637	0.14597	0.14898	0.14594	0.14707	0.14896	0.14759	0.14675	0.15337	0.14803	0.14597	0.15052	0.15028	0.15092	0.14746	0.14731	0.14655	0.16234	0.16068	0.16242	0.1736	0.14963	0.16238	0.1502	0.14735	0.14867	0.14764	0.14765	0.15088	0.15653	0.16235	0.15525	0.15689	0.16635	0.15148	0.1753	0.16	0.16247	0.16242	0.15825
359	0.14856	0.14894	0.14924	0.14885	0.14904	0.14889	0.14915	0.15154	0.15212	0.14942	0.149	0.15199	0.14896	0.15018	0.15216	0.15074	0.14983	0.15687	0.15121	0.14899	0.15385	0.15357	0.15427	0.15059	0.15046	0.14961	0.16645	0.16465	0.1665	0.17861	0.15289	0.16648	0.15351	0.15049	0.15187	0.15078	0.15078	0.1542	0.16023	0.16645	0.15885	0.1606	0.17073	0.15487	0.18055	0.16391	0.16659	0.16653	0.16202
360	0.15159	0.15203	0.15234	0.15191	0.15207	0.152	0.15226	0.1547	0.1552	0.15256	0.15211	0.15508	0.15207	0.15339	0.15547	0.15399	0.15301	0.1605	0.1545	0.15211	0.15731	0.15699	0.15775	0.15382	0.15371	0.15276	0.17079	0.16883	0.17081	0.18401	0.15627	0.17081	0.15694	0.15374	0.15517	0.15403	0.154	0.15765	0.1641	0.17078	0.16261	0.16447	0.17538	0.15839	0.18622	0.16802	0.17092	0.17087	0.16597
361	0.15471	0.15522	0.15553	0.15505	0.15518	0.1552	0.15546	0.15796	0.15838	0.1558	0.15532	0.15826	0.15527	0.1567	0.15889	0.15735	0.15628	0.1643	0.15791	0.15532	0.16091	0.16054	0.16137	0.15717	0.15708	0.15601	0.17539	0.17325	0.17538	0.18986	0.15978	0.17539	0.1605	0.15709	0.1586	0.15739	0.15734	0.16124	0.16817	0.17537	0.16654	0.16854	0.18036	0.16206	0.19237	0.17235	0.17552	0.17547	0.17012
362	0.15793	0.15851	0.15882	0.15829	0.15838	0.15851	0.15877	0.16132	0.16165	0.15914	0.15863	0.16154	0.15857	0.16013	0.16245	0.16083	0.15967	0.16827	0.16144	0.15863	0.16465	0.16423	0.16514	0.16063	0.16056	0.15937	0.18029	0.17793	0.18024	0.19626	0.16342	0.18027	0.16421	0.16056	0.16215	0.16087	0.16079	0.16497	0.17244	0.18024	0.17067	0.17282	0.1857	0.16588	0.19911	0.17694	0.18041	0.18036	0.17451
363	0.16124	0.16192	0.16223	0.16164	0.16168	0.16192	0.16219	0.1648	0.16502	0.1626	0.16206	0.16492	0.16199	0.16369	0.16615	0.16445	0.16319	0.17244	0.16511	0.16206	0.16856	0.16808	0.16908	0.16423	0.16419	0.16285	0.18553	0.18291	0.18545	0.20332	0.16722	0.18549	0.16808	0.16417	0.16584	0.16448	0.16438	0.16887	0.17696	0.18545	0.17502	0.17735	0.19149	0.16988	0.20654	0.18183	0.18564	0.18559	0.17916
364	0.16467	0.16544	0.16576	0.1651	0.16509	0.16546	0.16573	0.1684	0.16851	0.16619	0.16561	0.16841	0.16553	0.1674	0.17002	0.16821	0.16683	0.17683	0.16894	0.16561	0.17266	0.17211	0.17321	0.16797	0.16796	0.16646	0.19118	0.18825	0.19107	0.2112	0.1712	0.19109	0.17214	0.16792	0.16969	0.16825	0.16811	0.17296	0.18176	0.19105	0.17963	0.18216	0.1978	0.17408	0.21483	0.18705	0.19127	0.19121	0.18411
365	0.16821	0.16909	0.16942	0.16868	0.16862	0.16914	0.16941	0.17215	0.17212	0.16992	0.1693	0.17203	0.16921	0.17126	0.17406	0.17213	0.17063	0.18148	0.17294	0.1693	0.17696	0.17634	0.17755	0.17187	0.1719	0.17022	0.1973	0.194	0.19716	0.22009	0.17536	0.19716	0.17639	0.17183	0.17372	0.17217	0.172	0.17725	0.18687	0.19711	0.18452	0.18728	0.20474	0.17849	0.22416	0.19268	0.19735	0.1973	0.18942
366	0.17189	0.1729	0.17322	0.1724	0.17227	0.17296	0.17323	0.17604	0.17586	0.17381	0.17313	0.17579	0.17303	0.17529	0.1783	0.17623	0.17458	0.18641	0.17713	0.17314	0.1815	0.18079	0.18214	0.17595	0.17602	0.17414	0.20398	0.20022	0.20382	0.23028	0.17975	0.20377	0.18088	0.17593	0.17795	0.17628	0.17606	0.18178	0.19234	0.2037	0.18974	0.19278	0.21246	0.18316	0.23481	0.19876	0.20399	0.20393	0.19513
367	0.17571	0.17686	0.17719	0.17627	0.17607	0.17695	0.17722	0.18011	0.17975	0.17787	0.17713	0.17969	0.17701	0.17953	0.18276	0.18054	0.17872	0.19167	0.18154	0.17715	0.1863	0.1855	0.18699	0.18024	0.18034	0.17824	0.21133	0.20701	0.21117	0.24216	0.18437	0.21102	0.18563	0.18023	0.1824	0.18059	0.18033	0.18657	0.19824	0.21092	0.19534	0.19871	0.22115	0.18811	0.24714	0.2054	0.21127	0.21121	0.20134
368	0.17969	0.181	0.18133	0.18031	0.18003	0.18111	0.1814	0.18435	0.1838	0.18212	0.18132	0.18375	0.18118	0.18398	0.18748	0.18506	0.18307	0.1973	0.18619	0.18134	0.1914	0.19049	0.19215	0.18475	0.1849	0.18254	0.21951	0.21448	0.21939	0.25629	0.18928	0.21906	0.19067	0.18475	0.18709	0.18512	0.18482	0.19166	0.20463	0.21892	0.20139	0.20514	0.23107	0.19339	0.26166	0.21269	0.21933	0.21927	0.20812
369	0.18385	0.18533	0.18568	0.18453	0.18416	0.18548	0.18577	0.18881	0.18803	0.18658	0.18571	0.18799	0.18555	0.18868	0.19248	0.18984	0.18763	0.20338	0.19111	0.18574	0.19684	0.19582	0.19767	0.18951	0.18972	0.18707	0.2287	0.22276	0.22867	0.27351	0.19449	0.22803	0.19604	0.18953	0.19207	0.18992	0.18956	0.1971	0.21161	0.22784	0.20796	0.21219	0.24259	0.19903	0.27908	0.22078	0.22835	0.22829	0.2156
370	0.1882	0.18989	0.19024	0.18895	0.18848	0.19006	0.19037	0.19349	0.19245	0.19128	0.19033	0.19243	0.19014	0.19366	0.19781	0.19491	0.19245	0.20997	0.19634	0.19037	0.20268	0.20152	0.20359	0.19456	0.19483	0.19185	0.23917	0.23203	0.23932	0.29505	0.20007	0.23818	0.20181	0.1946	0.19737	0.195	0.19459	0.20294	0.2193	0.23792	0.21516	0.21996	0.25624	0.2051	0.30042	0.22985	0.23855	0.23849	0.22394
371	0.19276	0.19468	0.19505	0.1936	0.19301	0.1949	0.19522	0.19842	0.19709	0.19625	0.1952	0.19708	0.19499	0.19897	0.20351	0.20029	0.19756	0.21716	0.20192	0.19526	0.20896	0.20765	0.20999	0.19993	0.20027	0.19691	0.25126	0.24253	0.25177	0.32283	0.20607	0.2498	0.20802	0.2	0.20303	0.20041	0.19994	0.20925	0.22783	0.24944	0.22312	0.22862	0.2728	0.21166	0.32723	0.24013	0.25022	0.25017	0.23333
372	0.19757	0.19976	0.20013	0.1985	0.19777	0.20002	0.20035	0.20364	0.20198	0.20152	0.20036	0.20198	0.20012	0.20464	0.20965	0.20604	0.20299	0.22508	0.20791	0.20044	0.21578	0.2143	0.21693	0.20568	0.2061	0.2023	0.26548	0.25456	0.26662	0.35967	0.21255	0.26327	0.21476	0.20577	0.20912	0.20619	0.20566	0.2161	0.23741	0.2628	0.23199	0.23839	0.29342	0.2188	0.36171	0.25195	0.26377	0.26373	0.24406
373	0.20265	0.20514	0.20553	0.20369	0.20281	0.20545	0.20581	0.20918	0.20713	0.20713	0.20584	0.20715	0.20556	0.21073	0.2163	0.21222	0.20879	0.23385	0.21437	0.20595	0.22322	0.22154	0.22452	0.21187	0.21236	0.20807	0.28253	0.26854	0.28476	0.40962	0.2196	0.27915	0.22212	0.21197	0.21571	0.21241	0.21181	0.2236	0.24828	0.27853	0.24199	0.24954	0.31986	0.22663	0.4071	0.26573	0.27974	0.27972	0.25651
374	0.20803	0.21088	0.21129	0.2092	0.20814	0.21125	0.21163	0.21509	0.21258	0.21314	0.2117	0.21262	0.21138	0.21732	0.22355	0.21887	0.21502	0.24368	0.22137	0.21185	0.23139	0.22948	0.23289	0.21855	0.21914	0.21427	0.30343	0.28504	0.30749	0.47777	0.22732	0.29819	0.23022	0.21867	0.22288	0.21913	0.21846	0.23187	0.26077	0.29741	0.25342	0.26247	0.35476	0.23526	0.4677	0.28209	0.29888	0.2989	0.27119
375	0.21375	0.21702	0.21745	0.21508	0.21381	0.21745	0.21788	0.2214	0.21838	0.21959	0.21798	0.21843	0.2176	0.2245	0.23151	0.22609	0.22173	0.25481	0.22901	0.21818	0.24043	0.23827	0.24217	0.22581	0.22652	0.22097	0.32968	0.30484	0.33671	0.56853	0.23584	0.32143	0.23921	0.22595	0.23075	0.22643	0.22569	0.24109	0.27537	0.32049	0.26666	0.2777	0.402	0.24488	0.54815	0.30189	0.32227	0.32237	0.28886
376	0.21987	0.22361	0.22408	0.22137	0.21986	0.22413	0.2246	0.22819	0.22456	0.22657	0.22475	0.22463	0.22431	0.23236	0.24032	0.23397	0.22902	0.26754	0.23741	0.22501	0.25053	0.24809	0.25258	0.23377	0.23461	0.22827	0.36347	0.32903	0.37514	0.67977	0.24533	0.35037	0.24929	0.23393	0.23943	0.23443	0.23362	0.25145	0.29268	0.3493	0.28226	0.296	0.46668	0.25568	0.6498	0.32633	0.35139	0.35163	0.31061
377	0.22643	0.23074	0.23125	0.22814	0.22636	0.23135	0.23189	0.23552	0.23119	0.23416	0.23208	0.23127	0.23157	0.24105	0.25016	0.24263	0.23697	0.2823	0.24672	0.23243	0.26192	0.25915	0.26436	0.24256	0.24353	0.23626	0.40795	0.35913	0.42648	0.79312	0.25599	0.38711	0.26069	0.24272	0.24912	0.24324	0.24237	0.26325	0.31362	0.38594	0.30097	0.31841	0.55377	0.26793	0.76225	0.35719	0.38836	0.38885	0.33805
378	0.23352	0.23849	0.23904	0.23547	0.23337	0.2392	0.23982	0.24348	0.23832	0.24246	0.24008	0.23841	0.23948	0.25075	0.26126	0.25221	0.2457	0.29965	0.25711	0.24055	0.2749	0.27174	0.27783	0.25234	0.25346	0.2451	0.46736	0.39724	0.49499	0.87494	0.26811	0.43449	0.27377	0.25248	0.26004	0.25304	0.25213	0.27686	0.33941	0.43322	0.32386	0.3464	0.66303	0.28197	0.85721	0.39699	0.43603	0.43695	0.37351
379	0.2412	0.24696	0.24758	0.24345	0.24097	0.24779	0.24853	0.25216	0.24603	0.2516	0.24886	0.24613	0.24815	0.26167	0.27394	0.2629	0.25537	0.32035	0.26883	0.24948	0.28984	0.28626	0.29342	0.26332	0.26462	0.25494	0.54627	0.44614	0.58348	0.90368	0.28204	0.49603	0.28895	0.26343	0.27248	0.26403	0.26311	0.29277	0.37181	0.49444	0.35243	0.38202	0.779	0.29828	0.90537	0.44917	0.49789	0.4995	0.4204
380	0.24958	0.25629	0.25699	0.25219	0.24927	0.25725	0.25815	0.26169	0.25441	0.26174	0.25856	0.25451	0.25771	0.27412	0.28858	0.27493	0.26617	0.34543	0.28218	0.25938	0.30725	0.30321	0.3117	0.27578	0.27727	0.26602	0.64604	0.50903	0.68783	0.88828	0.29825	0.57478	0.30685	0.27583	0.28684	0.27648	0.2756	0.31169	0.41317	0.57216	0.38877	0.42788	0.86841	0.31742	0.90433	0.51783	0.57695	0.57949	0.48309
381	0.25878	0.26662	0.26744	0.26184	0.25839	0.26776	0.26886	0.27223	0.26358	0.2731	0.26936	0.26367	0.26835	0.28848	0.30574	0.28861	0.27832	0.37627	0.29756	0.27046	0.32781	0.32326	0.33341	0.29009	0.29178	0.27863	0.7565	0.58818	0.78982	0.84862	0.31738	0.66973	0.32828	0.29001	0.30364	0.29073	0.28999	0.33455	0.46647	0.66464	0.43566	0.48702	0.90512	0.3402	0.87248	0.60572	0.67199	0.67539	0.56572
382	0.26896	0.27818	0.27914	0.27256	0.26849	0.27951	0.28089	0.28395	0.27367	0.28592	0.28149	0.27373	0.28028	0.30529	0.32612	0.3043	0.29213	0.4147	0.31548	0.28297	0.35238	0.34731	0.35952	0.30671	0.30861	0.29315	0.84994	0.68118	0.86106	0.79735	0.34028	0.76899	0.35435	0.30641	0.3236	0.30723	0.30679	0.36264	0.53469	0.75999	0.4963	0.56163	0.89402	0.36763	0.82548	0.70854	0.77091	0.77437	0.66747
383	0.28031	0.2912	0.29237	0.28457	0.27977	0.29276	0.29452	0.29708	0.28486	0.30054	0.29524	0.28485	0.29377	0.32524	0.35069	0.32249	0.30799	0.46292	0.33662	0.29724	0.38209	0.37653	0.3913	0.32626	0.32837	0.3101	0.89739	0.77499	0.88521	0.74075	0.36806	0.84793	0.38657	0.32561	0.34768	0.32659	0.32669	0.39765	0.6186	0.83533	0.57306	0.64992	0.85559	0.401	0.77139	0.80722	0.84901	0.85124	0.77386
384	0.29306	0.30601	0.30745	0.29816	0.29247	0.30785	0.31011	0.31189	0.29734	0.31738	0.31097	0.29724	0.30917	0.34932	0.38073	0.34382	0.32639	0.52311	0.36185	0.31369	0.41835	0.41242	0.43032	0.34956	0.35186	0.33014	0.89566	0.8462	0.86987	0.68202	0.40219	0.88474	0.42686	0.34835	0.37716	0.34957	0.35059	0.44164	0.71197	0.87112	0.66374	0.74116	0.80417	0.44189	0.71433	0.87265	0.88488	0.8853	0.85532
385	0.30753	0.32301	0.32483	0.31368	0.30691	0.32517	0.32813	0.32873	0.31137	0.33697	0.32914	0.31112	0.32693	0.37879	0.41786	0.36908	0.34797	0.59602	0.39228	0.33286	0.46276	0.45674	0.47828	0.37768	0.3801	0.35419	0.86265	0.8767	0.8315	0.62276	0.44445	0.87931	0.47745	0.37559	0.41368	0.37718	0.37973	0.49668	0.79722	0.86708	0.75604	0.81508	0.74668	0.49188	0.65639	0.88996	0.87882	0.87788	0.88873
386	0.32409	0.34271	0.34505	0.33157	0.32351	0.34526	0.34916	0.348	0.32727	0.35999	0.35034	0.32679	0.34759	0.41535	0.46397	0.39924	0.37353	0.67804	0.42926	0.35544	0.51676	0.51116	0.53653	0.41196	0.41439	0.38343	0.81425	0.86827	0.78141	0.56376	0.4967	0.84657	0.54017	0.40851	0.45911	0.41069	0.41562	0.56368	0.85184	0.8365	0.82763	0.85346	0.68665	0.55198	0.59857	0.86911	0.8458	0.84417	0.87766
387	0.34323	0.36574	0.3688	0.3524	0.34277	0.36876	0.37395	0.37018	0.34542	0.38729	0.37528	0.34459	0.37184	0.46098	0.52073	0.43544	0.40404	0.75759	0.47424	0.38233	0.58065	0.5762	0.60467	0.45395	0.45621	0.41936	0.75855	0.83479	0.72553	0.50543	0.56007	0.79965	0.61456	0.4485	0.51505	0.45154	0.46002	0.63997	0.86572	0.7916	0.86051	0.85399	0.62583	0.62103	0.54135	0.82719	0.79878	0.79682	0.84015
388	0.36555	0.39288	0.39691	0.37687	0.36535	0.39644	0.40337	0.39583	0.36627	0.41987	0.40484	0.36493	0.40052	0.51755	0.58829	0.47881	0.44061	0.81713	0.52833	0.41458	0.65164	0.64919	0.67829	0.50508	0.50691	0.46366	0.69963	0.78803	0.66703	0.44802	0.63298	0.74576	0.69465	0.49686	0.58152	0.5011	0.51443	0.71658	0.84648	0.73948	0.85483	0.82726	0.56511	0.6935	0.48497	0.77498	0.74487	0.74275	0.78963
389	0.39179	0.425	0.43033	0.40582	0.39206	0.42917	0.43842	0.4255	0.39035	0.45877	0.43997	0.3883	0.43455	0.58549	0.66287	0.53001	0.4843	0.84349	0.5912	0.45338	0.72188	0.72185	0.74715	0.56581	0.56695	0.51782	0.63958	0.73464	0.60758	0.39182	0.70849	0.68869	0.76698	0.55418	0.65473	0.55982	0.57891	0.77891	0.80752	0.68396	0.82321	0.78492	0.50495	0.75838	0.42955	0.7179	0.68783	0.68565	0.7329
390	0.42279	0.463	0.46999	0.44017	0.42382	0.46783	0.48004	0.45971	0.41824	0.50482	0.48155	0.41518	0.47481	0.66116	0.73435	0.58837	0.5356	0.83701	0.65932	0.49974	0.77872	0.78056	0.79739	0.63387	0.63426	0.58187	0.57942	0.67813	0.54802	0.33726	0.77324	0.63043	0.81506	0.61896	0.72499	0.62572	0.64993	0.81379	0.7583	0.62707	0.77764	0.73428	0.44568	0.80255	0.3753	0.65872	0.62962	0.62742	0.67333
391	0.45941	0.50751	0.51646	0.48078	0.46159	0.51298	0.52869	0.49866	0.45047	0.55799	0.52999	0.44606	0.52178	0.73412	0.78814	0.65038	0.59352	0.80747	0.72427	0.55388	0.81069	0.81303	0.81942	0.70223	0.70216	0.65229	0.5197	0.6204	0.48887	0.28518	0.81305	0.57202	0.83026	0.68573	0.77853	0.69243	0.71835	0.81797	0.70379	0.5699	0.72482	0.67934	0.38766	0.81855	0.32267	0.59893	0.57128	0.56906	0.61274
392	0.5023	0.55826	0.56919	0.52798	0.50604	0.56423	0.58351	0.54194	0.48737	0.61627	0.58442	0.48123	0.57484	0.78908	0.81338	0.7088	0.6542	0.76453	0.77425	0.61399	0.81447	0.81603	0.81349	0.75922	0.75938	0.71997	0.46075	0.56248	0.4305	0.23685	0.82201	0.514	0.8163	0.74448	0.80494	0.74916	0.77109	0.7976	0.64679	0.51305	0.66839	0.62239	0.33147	0.80835	0.27248	0.5393	0.51334	0.51112	0.55207
393	0.55128	0.61326	0.62553	0.58084	0.5569	0.61938	0.64123	0.588	0.52871	0.67452	0.64159	0.52054	0.63122	0.81438	0.80936	0.75392	0.7102	0.71429	0.79975	0.67485	0.79506	0.79524	0.78683	0.7934	0.7945	0.77178	0.40289	0.50492	0.37335	0.19393	0.80468	0.45673	0.78287	0.78394	0.80307	0.78481	0.79773	0.7614	0.58883	0.45685	0.61036	0.56469	0.27812	0.77936	0.22609	0.48028	0.45614	0.45391	0.49188
394	0.60457	0.66773	0.67979	0.6361	0.61192	0.67344	0.6953	0.63368	0.57324	0.72449	0.6952	0.56302	0.68521	0.80945	0.7834	0.77797	0.75212	0.66019	0.79903	0.72759	0.76025	0.75901	0.74723	0.80034	0.80263	0.79731	0.34659	0.44807	0.31814	0.15801	0.76993	0.40049	0.73816	0.79772	0.77939	0.79435	0.79671	0.71587	0.53077	0.40161	0.55187	0.50698	0.22908	0.73874	0.18517	0.4222	0.39998	0.39774	0.43257
395	0.65775	0.71435	0.72402	0.68759	0.66595	0.71899	0.73724	0.67431	0.61817	0.75762	0.73698	0.60638	0.72888	0.78206	0.74371	0.77904	0.77298	0.60427	0.77722	0.76271	0.71617	0.71364	0.7001	0.78374	0.78705	0.79507	0.29271	0.39227	0.26601	0.12988	0.72495	0.34574	0.68717	0.78733	0.74167	0.78056	0.77388	0.66504	0.47309	0.34775	0.49355	0.44972	0.18617	0.69135	0.15122	0.36552	0.3453	0.34307	0.3746
396	0.70388	0.74553	0.7509	0.72736	0.71123	0.74861	0.76001	0.70466	0.65906	0.7691	0.76003	0.6469	0.75502	0.74093	0.69604	0.7608	0.77153	0.54766	0.74136	0.77484	0.66675	0.66309	0.64875	0.75086	0.7549	0.77108	0.24257	0.33801	0.21855	0.1092	0.6742	0.29323	0.63281	0.75908	0.6956	0.75015	0.73684	0.61131	0.4162	0.29599	0.43586	0.39336	0.15094	0.64016	0.12491	0.31093	0.29286	0.29068	0.31869
397	0.73552	0.75694	0.75732	0.74903	0.7402	0.75837	0.76159	0.72088	0.69069	0.75993	0.76219	0.67986	0.76063	0.69188	0.64382	0.72888	0.7516	0.49104	0.6969	0.76508	0.61437	0.60969	0.59517	0.70788	0.71242	0.73294	0.1979	0.28613	0.17757	0.0947	0.62029	0.24419	0.57679	0.71934	0.64467	0.70921	0.69122	0.55613	0.36058	0.24749	0.37927	0.33851	0.12395	0.58698	0.10571	0.25957	0.24388	0.24183	0.266
398	0.74793	0.74888	0.74477	0.7504	0.74877	0.7489	0.74459	0.72162	0.70875	0.73455	0.74585	0.70094	0.74732	0.63845	0.58919	0.68816	0.71857	0.4349	0.64743	0.73842	0.56053	0.55492	0.54058	0.65898	0.66388	0.68641	0.16044	0.23788	0.14445	0.084917	0.56486	0.20023	0.52015	0.6727	0.59109	0.66199	0.64065	0.50042	0.30697	0.2038	0.32446	0.28609	0.10452	0.53294	0.092348	0.21302	0.19999	0.19815	0.21812
399	0.74109	0.72523	0.71773	0.73394	0.73801	0.72423	0.714	0.7083	0.71145	0.69813	0.71584	0.70772	0.71962	0.58264	0.5334	0.64199	0.67708	0.37971	0.59509	0.70049	0.50609	0.49963	0.48572	0.60664	0.61184	0.63498	0.13111	0.19492	0.11944	0.078555	0.50883	0.16302	0.46352	0.622	0.53613	0.61109	0.58726	0.44476	0.25655	0.16655	0.27249	0.23748	0.091158	0.47868	0.083386	0.17305	0.16285	0.16131	0.17687
400	0.71844	0.69055	0.68071	0.70411	0.71204	0.68888	0.67434	0.68368	0.69968	0.65463	0.67667	0.70028	0.68208	0.52572	0.47726	0.59254	0.63033	0.32611	0.54126	0.65549	0.45165	0.44444	0.4311	0.55245	0.55791	0.58078	0.1096	0.15885	0.1016	0.074641	0.45286	0.13356	0.40745	0.56904	0.48067	0.55814	0.53241	0.38973	0.21091	0.13679	0.22487	0.19439	0.082283	0.42471	0.07761	0.14091	0.13345	0.13225	0.1436
401	0.68436	0.64861	0.63722	0.66518	0.67545	0.64653	0.62895	0.65073	0.67599	0.60677	0.63167	0.68055	0.63821	0.46854	0.42142	0.54126	0.58043	0.27509	0.48682	0.60621	0.39772	0.38989	0.37725	0.49745	0.50312	0.5252	0.094649	0.13055	0.089445	0.072466	0.3975	0.11176	0.35256	0.51497	0.42535	0.50422	0.47701	0.33603	0.17178	0.11453	0.18334	0.1584	0.076607	0.37153	0.074104	0.11681	0.11168	0.11081	0.11859
402	0.64274	0.60206	0.58963	0.62039	0.63197	0.59974	0.58	0.61196	0.64342	0.55627	0.58305	0.65129	0.59037	0.41176	0.3665	0.48905	0.52873	0.22806	0.4324	0.55441	0.34487	0.33664	0.32483	0.44232	0.44817	0.46912	0.084626	0.10975	0.081431	0.071536	0.3434	0.096454	0.29973	0.46054	0.3708	0.45003	0.42173	0.28464	0.14038	0.098758	0.14937	0.13033	0.073196	0.3198	0.072222	0.099751	0.096408	0.095803	0.10087
403	0.59624	0.55261	0.53952	0.57188	0.58409	0.55018	0.52891	0.56923	0.60458	0.50428	0.53225	0.61513	0.5401	0.35609	0.31334	0.43655	0.4761	0.18672	0.37859	0.50121	0.29398	0.28563	0.27485	0.38771	0.39365	0.41326	0.078141	0.095198	0.076367	0.071504	0.2915	0.086119	0.25025	0.40637	0.31786	0.39619	0.36725	0.23699	0.11682	0.088017	0.1234	0.10976	0.071401	0.27053	0.071509	0.088159	0.086094	0.085686	0.088828
404	0.5467	0.50148	0.48798	0.52111	0.53352	0.49902	0.47668	0.52388	0.56146	0.45163	0.48028	0.57416	0.48848	0.30251	0.26313	0.38438	0.42327	0.15254	0.32612	0.44748	0.24627	0.2382	0.22868	0.33436	0.34028	0.35835	0.074157	0.08542	0.07339	0.072114	0.24311	0.079387	0.20579	0.35312	0.26769	0.34339	0.31444	0.19475	0.10013	0.080962	0.10473	0.095442	0.070755	0.22512	0.071632	0.080554	0.079377	0.079111	0.080924
405	0.49536	0.44954	0.43582	0.46912	0.48142	0.4471	0.4241	0.47689	0.5155	0.39902	0.42791	0.52991	0.43632	0.25236	0.21744	0.33324	0.37091	0.12615	0.27605	0.39393	0.20332	0.19599	0.18797	0.28331	0.28903	0.30536	0.071946	0.079081	0.071898	0.073182	0.19988	0.075214	0.168	0.30168	0.22183	0.29259	0.26452	0.15945	0.088805	0.076539	0.091931	0.085849	0.070928	0.18518	0.072353	0.075772	0.075213	0.07505	0.07594
406	0.44314	0.3975	0.38379	0.41672	0.42869	0.39512	0.37188	0.42902	0.46778	0.34719	0.37584	0.48354	0.38431	0.20734	0.17796	0.2841	0.31982	0.10701	0.22979	0.34136	0.16675	0.16056	0.15419	0.236	0.24127	0.25562	0.071	0.075183	0.071465	0.074578	0.16343	0.072862	0.13797	0.25328	0.18198	0.24509	0.21904	0.13187	0.081373	0.073997	0.083454	0.079646	0.071687	0.15214	0.073502	0.072991	0.072868	0.072777	0.07302
407	0.39085	0.34615	0.3327	0.36469	0.37616	0.34386	0.32087	0.38095	0.41913	0.29709	0.3249	0.43591	0.33325	0.16916	0.146	0.23828	0.27113	0.093789	0.18904	0.29078	0.13761	0.13275	0.12799	0.19411	0.19868	0.21077	0.07096	0.073026	0.071791	0.076208	0.1347	0.071812	0.11565	0.20952	0.14947	0.20253	0.17972	0.11165	0.076702	0.072803	0.078043	0.075846	0.072865	0.12658	0.074959	0.071638	0.071822	0.071784	0.071571
408	0.33935	0.29648	0.28364	0.314	0.32478	0.29433	0.27223	0.33343	0.37039	0.25004	0.27618	0.38784	0.28419	0.13888	0.12177	0.1974	0.22629	0.084979	0.15523	0.2436	0.11582	0.11225	0.10886	0.15916	0.16283	0.17252	0.071571	0.072121	0.072661	0.078007	0.11345	0.071699	0.099929	0.17203	0.12465	0.16648	0.1478	0.097534	0.074005	0.072582	0.074821	0.073769	0.074342	0.10795	0.076637	0.07131	0.071713	0.071712	0.071177
409	0.28975	0.2498	0.23801	0.26588	0.27575	0.24783	0.22744	0.28744	0.32246	0.20759	0.23112	0.34015	0.23851	0.11643	0.10449	0.16293	0.18694	0.079335	0.12901	0.20145	0.10042	0.097921	0.09558	0.1319	0.13462	0.14196	0.072643	0.072108	0.073918	0.079924	0.098582	0.072252	0.089315	0.14192	0.1068	0.13787	0.12355	0.088064	0.07271	0.073054	0.073152	0.072918	0.076032	0.095039	0.078471	0.071712	0.072269	0.072295	0.071532
410	0.24347	0.20771	0.19742	0.22187	0.23061	0.20596	0.18812	0.2442	0.27648	0.17134	0.19135	0.29385	0.19781	0.10069	0.092705	0.13568	0.15444	0.075939	0.10991	0.16588	0.089994	0.088298	0.086713	0.11195	0.11381	0.11914	0.074044	0.072732	0.075449	0.081927	0.088583	0.073282	0.082396	0.11929	0.094543	0.11658	0.10621	0.081941	0.07242	0.074022	0.072594	0.072944	0.077872	0.086422	0.080417	0.072633	0.0733	0.073346	0.072421
411	0.20214	0.17177	0.16335	0.1836	0.19099	0.17029	0.15563	0.20518	0.23384	0.1423	0.15825	0.25022	0.16358	0.090104	0.08495	0.11547	0.1293	0.074145	0.096678	0.13778	0.083181	0.082069	0.081016	0.098094	0.099276	0.10304	0.07568	0.073812	0.077176	0.083992	0.082098	0.074651	0.078098	0.10324	0.086432	0.10158	0.094341	0.0782	0.072846	0.075345	0.072829	0.073594	0.079818	0.080896	0.082444	0.073926	0.074671	0.07473	0.07369
412	0.16729	0.14299	0.13656	0.15233	0.15826	0.14179	0.1305	0.17177	0.19605	0.1205	0.13246	0.21072	0.1366	0.08323	0.080064	0.10124	0.11101	0.073499	0.087852	0.11696	0.078949	0.078257	0.077579	0.088829	0.089511	0.092158	0.077482	0.075216	0.079041	0.086104	0.07811	0.076263	0.075666	0.092326	0.081282	0.091436	0.086514	0.07616	0.073784	0.076922	0.07363	0.074692	0.081841	0.077577	0.084532	0.075482	0.076283	0.076353	0.075229
413	0.13976	0.12139	0.11677	0.12841	0.13295	0.12045	0.11222	0.14485	0.16441	0.10503	0.11359	0.17678	0.11664	0.078978	0.077215	0.091624	0.098331	0.073671	0.082193	0.10236	0.076557	0.076167	0.075755	0.082868	0.083193	0.085063	0.079401	0.076851	0.081004	0.088251	0.075897	0.078046	0.074563	0.085178	0.078238	0.084822	0.08157	0.075335	0.075087	0.07868	0.074835	0.076107	0.08392	0.075836	0.086665	0.077226	0.078067	0.078144	0.076961
414	0.11935	0.10605	0.10289	0.11115	0.11453	0.10532	0.09955	0.12445	0.13951	0.094508	0.10044	0.14931	0.10263	0.07659	0.075819	0.085374	0.089884	0.074427	0.078793	0.092524	0.075483	0.07531	0.075086	0.079258	0.079328	0.080659	0.081406	0.07865	0.083039	0.090429	0.074954	0.079952	0.074411	0.080719	0.0767	0.080735	0.078678	0.075379	0.076649	0.080566	0.076326	0.077749	0.086039	0.075225	0.088833	0.079102	0.079973	0.080055	0.078828
415	0.10501	0.095625	0.093562	0.099287	0.10179	0.095057	0.09112	0.1098	0.12105	0.087636	0.091654	0.12841	0.0932	0.075528	0.075461	0.08154	0.084493	0.075599	0.077003	0.08616	0.07535	0.075332	0.075241	0.077321	0.077209	0.078162	0.08347	0.080566	0.085125	0.092632	0.074916	0.081945	0.074937	0.078174	0.076236	0.07845	0.077251	0.076042	0.078396	0.082546	0.078022	0.079551	0.08819	0.075421	0.091032	0.081073	0.081967	0.082053	0.080791
416	0.095359	0.088828	0.087546	0.091455	0.093321	0.088374	0.08575	0.099754	0.10807	0.083371	0.086027	0.11336	0.087112	0.075408	0.075839	0.07943	0.081281	0.077067	0.07636	0.082266	0.075888	0.075981	0.075984	0.076576	0.076334	0.077022	0.08558	0.082567	0.08725	0.094858	0.075522	0.084001	0.075944	0.076994	0.076537	0.077451	0.076868	0.077144	0.080274	0.084593	0.079862	0.081468	0.090367	0.076193	0.093258	0.083112	0.084024	0.084113	0.082823
417	0.089132	0.08462	0.083894	0.086519	0.08794	0.084248	0.082558	0.093157	0.09932	0.080964	0.082651	0.10302	0.083407	0.075959	0.076741	0.078555	0.079622	0.078745	0.076536	0.080128	0.076903	0.077075	0.077146	0.07668	0.076345	0.076846	0.087724	0.084627	0.089406	0.097108	0.076587	0.086105	0.077294	0.076787	0.077383	0.07737	0.077226	0.07856	0.082246	0.08669	0.081806	0.083467	0.092568	0.077374	0.095509	0.0852	0.086128	0.086219	0.084904
418	0.085337	0.082254	0.081922	0.083639	0.084748	0.081938	0.080915	0.089058	0.093695	0.07988	0.080876	0.096232	0.081397	0.076982	0.078014	0.07856	0.079071	0.080572	0.077292	0.079237	0.078257	0.078484	0.078604	0.077386	0.076985	0.077354	0.089896	0.086733	0.091587	0.099382	0.077976	0.088244	0.078886	0.077271	0.078615	0.077942	0.078111	0.080199	0.084285	0.088825	0.083823	0.085526	0.094789	0.078847	0.097786	0.087325	0.088267	0.088361	0.087023
419	0.083271	0.0812	0.08115	0.082221	0.083112	0.080925	0.080377	0.086753	0.09031	0.079738	0.080243	0.092005	0.080596	0.078342	0.079551	0.079191	0.079308	0.082505	0.078461	0.079236	0.079853	0.080118	0.080273	0.078518	0.078072	0.078347	0.092091	0.088874	0.093791	0.10168	0.079596	0.090412	0.080651	0.078246	0.080121	0.078978	0.079371	0.081995	0.086374	0.090992	0.085895	0.087629	0.097032	0.080526	0.10009	0.089479	0.090436	0.090531	0.08917
420	0.082434	0.081082	0.081231	0.081845	0.082582	0.080836	0.080625	0.085734	0.088526	0.080269	0.080424	0.089615	0.080658	0.079941	0.081274	0.080269	0.080107	0.084515	0.079924	0.079866	0.081619	0.081912	0.082092	0.079955	0.079477	0.079684	0.094309	0.091043	0.096016	0.10401	0.081379	0.092604	0.082539	0.07957	0.081822	0.080345	0.080896	0.083905	0.0885	0.093186	0.088006	0.089766	0.099296	0.082353	0.10242	0.091657	0.092629	0.092726	0.091341
421	0.082482	0.081637	0.081926	0.082218	0.082847	0.08141	0.081438	0.085643	0.087896	0.081281	0.08119	0.088552	0.081339	0.08171	0.083132	0.081669	0.081309	0.08658	0.081597	0.08095	0.08351	0.08382	0.08402	0.08161	0.081109	0.081267	0.096548	0.093236	0.098264	0.10637	0.083281	0.09482	0.084515	0.081146	0.083664	0.081949	0.082612	0.085896	0.090657	0.095405	0.09015	0.091932	0.10158	0.084287	0.10478	0.093858	0.094845	0.094943	0.093533
422	0.083148	0.082661	0.08305	0.083114	0.083667	0.082449	0.082646	0.086206	0.088078	0.082629	0.082363	0.088424	0.082453	0.083599	0.085084	0.083294	0.082793	0.088688	0.083419	0.08235	0.085489	0.085811	0.086026	0.083417	0.082902	0.083023	0.098808	0.095452	0.10053	0.10876	0.085266	0.097058	0.086555	0.082896	0.085606	0.08372	0.084463	0.087948	0.092839	0.097647	0.092319	0.094122	0.1039	0.086298	0.10718	0.096079	0.097084	0.097183	0.095745
423	0.084249	0.084016	0.084475	0.084377	0.084876	0.083815	0.084131	0.08723	0.088832	0.084216	0.083825	0.088957	0.083871	0.085572	0.087105	0.085079	0.084476	0.090827	0.085345	0.083973	0.087531	0.087861	0.088087	0.085332	0.084807	0.0849	0.10109	0.09769	0.10283	0.11118	0.08731	0.099318	0.088642	0.084771	0.087618	0.085609	0.086408	0.090043	0.095043	0.099914	0.094512	0.096334	0.10624	0.088364	0.10961	0.098321	0.099345	0.099446	0.097977
424	0.085657	0.085606	0.086116	0.085902	0.086361	0.085413	0.085815	0.088585	0.089994	0.085972	0.085491	0.089962	0.085507	0.087606	0.089175	0.086978	0.086302	0.092994	0.087347	0.085754	0.08962	0.089955	0.090192	0.087325	0.086794	0.086864	0.1034	0.099951	0.10515	0.11365	0.0894	0.1016	0.090765	0.086736	0.089684	0.087584	0.088424	0.092174	0.09727	0.10221	0.096726	0.098569	0.10861	0.090472	0.11209	0.10058	0.10163	0.10173	0.10023
425	0.087287	0.087367	0.087912	0.087615	0.088045	0.087179	0.087642	0.090177	0.09145	0.087851	0.087306	0.091305	0.0873	0.089687	0.091284	0.088963	0.088231	0.095184	0.089406	0.087651	0.091747	0.092084	0.09233	0.089377	0.088841	0.088892	0.10574	0.10224	0.1075	0.11616	0.091525	0.10391	0.092917	0.088766	0.09179	0.089622	0.090491	0.094333	0.099519	0.10452	0.098961	0.10083	0.11102	0.092615	0.1146	0.10287	0.10394	0.10405	0.1025
426	0.089076	0.08925	0.08982	0.089463	0.089872	0.089067	0.089572	0.091942	0.093116	0.089819	0.089228	0.092892	0.089206	0.091803	0.093424	0.09101	0.090237	0.097396	0.091508	0.089632	0.093905	0.094242	0.094497	0.091472	0.090934	0.090968	0.10811	0.10455	0.10988	0.11871	0.093678	0.10625	0.095094	0.090846	0.093929	0.091708	0.092598	0.096517	0.10179	0.10687	0.10122	0.10311	0.11346	0.094786	0.11717	0.10518	0.10628	0.10639	0.1048
427	0.090984	0.091226	0.091813	0.091413	0.091806	0.091046	0.091581	0.093837	0.09494	0.091856	0.091231	0.09466	0.091198	0.093948	0.09559	0.093106	0.092302	0.099631	0.093646	0.091677	0.096089	0.096425	0.09669	0.093602	0.093063	0.093082	0.11051	0.10688	0.11229	0.12132	0.095857	0.10862	0.097295	0.092965	0.096097	0.093834	0.094738	0.098726	0.10409	0.10925	0.1035	0.10541	0.11595	0.096983	0.11979	0.10752	0.10865	0.10876	0.10713
428	0.092971	0.093264	0.093865	0.093431	0.093812	0.093087	0.093644	0.09582	0.09687	0.093941	0.093289	0.096549	0.093248	0.096117	0.097779	0.095239	0.094408	0.10189	0.095811	0.093767	0.098297	0.098632	0.098905	0.09576	0.095221	0.095224	0.11294	0.10925	0.11475	0.12399	0.098058	0.11102	0.099518	0.095114	0.098288	0.095989	0.096905	0.10096	0.10641	0.11167	0.10581	0.10775	0.11848	0.099204	0.12247	0.1099	0.11105	0.11116	0.10948
429	0.095024	0.095355	0.095966	0.095507	0.095877	0.095181	0.095753	0.097876	0.098886	0.096067	0.095395	0.098537	0.095347	0.098309	0.09999	0.097405	0.096551	0.10417	0.098001	0.095895	0.10053	0.10086	0.10114	0.097944	0.097405	0.097393	0.11542	0.11166	0.11724	0.12672	0.10028	0.11346	0.10176	0.097291	0.1005	0.098172	0.099097	0.10321	0.10876	0.11412	0.10814	0.11011	0.12106	0.10145	0.12522	0.1123	0.11349	0.11361	0.11187
430	0.097118	0.097481	0.0981	0.097619	0.097981	0.097309	0.097894	0.099979	0.10096	0.098221	0.097533	0.10059	0.09748	0.10052	0.10222	0.099596	0.09872	0.10648	0.10021	0.098051	0.10278	0.10311	0.10341	0.10015	0.099611	0.099583	0.11794	0.11409	0.11978	0.12953	0.10253	0.11594	0.10403	0.09949	0.10274	0.10038	0.10131	0.10549	0.11115	0.11662	0.1105	0.11251	0.12369	0.10372	0.12803	0.11474	0.11597	0.11609	0.11429
431	0.09925	0.09964	0.10027	0.099767	0.10012	0.09947	0.10006	0.10213	0.10308	0.1004	0.099701	0.10269	0.099644	0.10275	0.10448	0.10181	0.10092	0.10881	0.10245	0.10023	0.10506	0.10539	0.10569	0.10238	0.10184	0.1018	0.12051	0.11657	0.12237	0.13241	0.10479	0.11846	0.10632	0.10171	0.105	0.10261	0.10355	0.10779	0.11357	0.11916	0.1129	0.11495	0.12639	0.10601	0.13093	0.11722	0.1185	0.11862	0.11675
432	0.10141	0.10183	0.10246	0.10194	0.10229	0.10166	0.10226	0.10431	0.10524	0.10261	0.1019	0.10484	0.10184	0.10501	0.10676	0.10406	0.10314	0.11117	0.10471	0.10244	0.10737	0.10769	0.10801	0.10463	0.10409	0.10403	0.12313	0.1191	0.12502	0.13537	0.10709	0.12103	0.10864	0.10396	0.10729	0.10486	0.10581	0.11013	0.11603	0.12175	0.11534	0.11742	0.12915	0.10833	0.13392	0.11975	0.12107	0.12119	0.11925
433	0.10361	0.10404	0.10468	0.10415	0.10449	0.10388	0.10449	0.10653	0.10744	0.10485	0.10412	0.10703	0.10405	0.10729	0.10906	0.10632	0.10539	0.11357	0.10699	0.10467	0.1097	0.11002	0.11035	0.10691	0.10637	0.10629	0.12581	0.12167	0.12773	0.13844	0.10941	0.12365	0.11099	0.10623	0.1096	0.10714	0.10809	0.11249	0.11853	0.1244	0.11781	0.11994	0.13198	0.11068	0.137	0.12233	0.1237	0.12382	0.12179
434	0.10583	0.10628	0.10693	0.10638	0.10671	0.10612	0.10673	0.10878	0.10967	0.10711	0.10637	0.10926	0.1063	0.10959	0.11139	0.10862	0.10766	0.116	0.10931	0.10693	0.11207	0.11238	0.11272	0.10921	0.10867	0.10857	0.12856	0.1243	0.1305	0.1416	0.11175	0.12634	0.11337	0.10852	0.11194	0.10945	0.1104	0.11488	0.12107	0.12711	0.12032	0.1225	0.13489	0.11307	0.14019	0.12495	0.12638	0.12651	0.12439
435	0.10808	0.10855	0.1092	0.10864	0.10896	0.10839	0.10901	0.11107	0.11194	0.10939	0.10864	0.11152	0.10857	0.11192	0.11376	0.11094	0.10996	0.11848	0.11165	0.10921	0.11446	0.11477	0.11513	0.11154	0.111	0.11088	0.13137	0.12698	0.13335	0.14489	0.11413	0.12908	0.11578	0.11085	0.11431	0.11178	0.11274	0.11732	0.12367	0.12988	0.12289	0.12512	0.13789	0.11548	0.1435	0.12764	0.12913	0.12927	0.12704
436	0.11035	0.11085	0.1115	0.11092	0.11124	0.11069	0.11131	0.11338	0.11424	0.11171	0.11094	0.11381	0.11087	0.11428	0.11615	0.1133	0.11229	0.12099	0.11402	0.11152	0.1169	0.1172	0.11757	0.1139	0.11336	0.11321	0.13427	0.12973	0.13628	0.1483	0.11655	0.1319	0.11824	0.1132	0.11672	0.11415	0.11511	0.11979	0.12632	0.13273	0.1255	0.12779	0.14099	0.11794	0.14694	0.13039	0.13195	0.13209	0.12975
437	0.11265	0.11317	0.11383	0.11324	0.11355	0.11301	0.11365	0.11573	0.11657	0.11405	0.11327	0.11614	0.1132	0.11668	0.11858	0.11568	0.11464	0.12355	0.11642	0.11386	0.11937	0.11966	0.12006	0.11629	0.11576	0.11558	0.13724	0.13255	0.13929	0.15187	0.119	0.1348	0.12073	0.11559	0.11916	0.11654	0.11752	0.1223	0.12903	0.13566	0.12817	0.13053	0.14419	0.12044	0.15053	0.13321	0.13485	0.135	0.13253
438	0.11498	0.11553	0.11619	0.11558	0.11588	0.11537	0.11601	0.11811	0.11893	0.11643	0.11563	0.11849	0.11555	0.11911	0.12105	0.11811	0.11704	0.12617	0.11886	0.11623	0.12189	0.12217	0.12259	0.11871	0.11818	0.11798	0.14032	0.13544	0.14241	0.15559	0.12149	0.13777	0.12326	0.11801	0.12164	0.11898	0.11996	0.12486	0.13181	0.13867	0.13091	0.13334	0.14752	0.12298	0.15429	0.13611	0.13783	0.13799	0.13538
439	0.11734	0.11792	0.11859	0.11795	0.11825	0.11776	0.1184	0.12053	0.12132	0.11884	0.11802	0.12088	0.11794	0.12157	0.12356	0.12057	0.11946	0.12884	0.12135	0.11863	0.12445	0.12472	0.12516	0.12118	0.12065	0.12041	0.14349	0.13842	0.14563	0.15951	0.12403	0.14085	0.12585	0.12046	0.12417	0.12145	0.12244	0.12747	0.13465	0.14179	0.13371	0.13621	0.15098	0.12557	0.15824	0.13909	0.14091	0.14107	0.13831
440	0.11974	0.12034	0.12101	0.12036	0.12064	0.12018	0.12083	0.12298	0.12375	0.12128	0.12045	0.12331	0.12037	0.12408	0.12612	0.12307	0.12193	0.13157	0.12387	0.12107	0.12706	0.12732	0.12779	0.12369	0.12316	0.12288	0.14678	0.14149	0.14897	0.16364	0.12661	0.14402	0.12849	0.12296	0.12674	0.12397	0.12496	0.13014	0.13758	0.14501	0.13658	0.13918	0.15459	0.12821	0.16241	0.14216	0.14409	0.14426	0.14133
441	0.12217	0.1228	0.12348	0.12281	0.12308	0.12265	0.1233	0.12548	0.12622	0.12377	0.12292	0.12578	0.12283	0.12663	0.12873	0.12561	0.12443	0.13436	0.12644	0.12355	0.12973	0.12998	0.13048	0.12624	0.12571	0.1254	0.1502	0.14466	0.15245	0.16801	0.12925	0.14731	0.13118	0.12551	0.12936	0.12653	0.12753	0.13286	0.1406	0.14835	0.13954	0.14223	0.15837	0.13092	0.16682	0.14534	0.14738	0.14756	0.14444
442	0.12464	0.1253	0.12599	0.12529	0.12555	0.12515	0.12581	0.12801	0.12873	0.1263	0.12543	0.12829	0.12533	0.12924	0.13139	0.12821	0.12699	0.13723	0.12906	0.12607	0.13246	0.1327	0.13322	0.12884	0.12832	0.12796	0.15376	0.14794	0.15607	0.17266	0.13195	0.15072	0.13394	0.1281	0.13204	0.12914	0.13015	0.13565	0.14371	0.15182	0.14258	0.14538	0.16234	0.13368	0.17151	0.14863	0.1508	0.15099	0.14766
443	0.12714	0.12784	0.12854	0.12781	0.12806	0.1277	0.12837	0.1306	0.13129	0.12887	0.12798	0.13084	0.12788	0.13189	0.13411	0.13085	0.12959	0.14018	0.13174	0.12863	0.13525	0.13548	0.13604	0.13149	0.13097	0.13056	0.15749	0.15135	0.15987	0.17765	0.1347	0.15428	0.13677	0.13074	0.13478	0.13181	0.13283	0.13851	0.14692	0.15544	0.14572	0.14863	0.16654	0.13652	0.17652	0.15205	0.15436	0.15456	0.151
444	0.1297	0.13043	0.13114	0.13038	0.13061	0.13029	0.13097	0.13324	0.13389	0.1315	0.13058	0.13343	0.13048	0.13461	0.13689	0.13356	0.13224	0.14322	0.13448	0.13124	0.13812	0.13833	0.13892	0.1342	0.13369	0.13323	0.16139	0.1549	0.16385	0.18302	0.13752	0.15799	0.13967	0.13344	0.13759	0.13453	0.13556	0.14145	0.15025	0.15922	0.14897	0.15201	0.17098	0.13943	0.18192	0.1556	0.15808	0.15828	0.15446
445	0.1323	0.13308	0.1338	0.133	0.13322	0.13294	0.13363	0.13593	0.13654	0.13418	0.13323	0.13608	0.13313	0.13738	0.13974	0.13632	0.13495	0.14635	0.13728	0.13391	0.14106	0.14125	0.14189	0.13698	0.13647	0.13595	0.16549	0.1586	0.16806	0.18885	0.14042	0.16187	0.14265	0.1362	0.14046	0.13732	0.13836	0.14447	0.15371	0.16319	0.15234	0.15553	0.17571	0.14242	0.18777	0.15931	0.16197	0.16219	0.15807
446	0.13495	0.13577	0.1365	0.13568	0.13587	0.13564	0.13634	0.13868	0.13925	0.13691	0.13594	0.13879	0.13583	0.14023	0.14267	0.13916	0.13772	0.14958	0.14015	0.13664	0.14409	0.14426	0.14494	0.13982	0.13931	0.13873	0.16983	0.16247	0.17251	0.19524	0.1434	0.16596	0.14572	0.13903	0.14341	0.14017	0.14123	0.14759	0.15731	0.16736	0.15584	0.15919	0.18079	0.14551	0.19414	0.1632	0.16606	0.1663	0.16185
447	0.13765	0.13853	0.13927	0.13841	0.13858	0.13841	0.13911	0.14149	0.14201	0.13972	0.13871	0.14155	0.13859	0.14314	0.14568	0.14206	0.14055	0.15293	0.1431	0.13942	0.1472	0.14736	0.14809	0.14274	0.14223	0.14158	0.17443	0.16654	0.17725	0.20231	0.14646	0.17026	0.14888	0.14193	0.14645	0.14311	0.14417	0.1508	0.16107	0.17178	0.15948	0.16302	0.18627	0.14869	0.20116	0.16728	0.17038	0.17063	0.1658
448	0.14042	0.14135	0.14211	0.1412	0.14135	0.14123	0.14195	0.14437	0.14484	0.14259	0.14154	0.14437	0.14142	0.14614	0.14877	0.14505	0.14346	0.15641	0.14614	0.14228	0.15043	0.15055	0.15135	0.14573	0.14524	0.1445	0.17934	0.17082	0.18232	0.21023	0.14962	0.17482	0.15216	0.14491	0.14958	0.14612	0.1472	0.15413	0.16501	0.17646	0.16329	0.16704	0.19223	0.15198	0.20896	0.17159	0.17495	0.17522	0.16996
449	0.14325	0.14425	0.14501	0.14406	0.14418	0.14413	0.14486	0.14733	0.14774	0.14553	0.14445	0.14726	0.14432	0.14923	0.15197	0.14812	0.14645	0.16003	0.14926	0.14521	0.15376	0.15386	0.15471	0.14881	0.14833	0.1475	0.18461	0.17535	0.18779	0.21924	0.15289	0.17967	0.15555	0.14798	0.15281	0.14922	0.15031	0.15758	0.16915	0.18146	0.16729	0.17127	0.19879	0.15538	0.21773	0.17614	0.17982	0.18011	0.17436
450	0.14614	0.14721	0.14799	0.14698	0.14708	0.14711	0.14785	0.15037	0.15071	0.14856	0.14744	0.15023	0.14729	0.15241	0.15527	0.15128	0.14952	0.1638	0.15249	0.14821	0.15721	0.15728	0.15821	0.15199	0.15151	0.15059	0.1903	0.18017	0.19374	0.22965	0.15627	0.18486	0.15907	0.15114	0.15615	0.15242	0.15353	0.16117	0.17352	0.18682	0.17149	0.17575	0.20607	0.15892	0.22771	0.181	0.18502	0.18533	0.17902
451	0.14912	0.15026	0.15106	0.14999	0.15006	0.15017	0.15092	0.15349	0.15375	0.15167	0.1505	0.15327	0.15035	0.15569	0.1587	0.15455	0.15269	0.16775	0.15582	0.15131	0.1608	0.16084	0.16184	0.15527	0.15481	0.15378	0.19649	0.18531	0.20026	0.24194	0.15977	0.19043	0.16273	0.1544	0.15961	0.15573	0.15685	0.1649	0.17815	0.1926	0.17593	0.1805	0.21426	0.16261	0.23927	0.18618	0.19061	0.19095	0.18399
452	0.15217	0.1534	0.15421	0.15308	0.15311	0.15331	0.15409	0.15671	0.15689	0.15488	0.15366	0.1564	0.1535	0.1591	0.16225	0.15793	0.15596	0.17189	0.15928	0.15449	0.16454	0.16454	0.16563	0.15867	0.15822	0.15706	0.20329	0.19083	0.20749	0.2568	0.16342	0.19646	0.16656	0.15778	0.16321	0.15915	0.16029	0.16881	0.18307	0.19888	0.18063	0.18558	0.22363	0.16645	0.2529	0.19176	0.19666	0.19704	0.18932
453	0.15531	0.15664	0.15746	0.15627	0.15626	0.15656	0.15735	0.16003	0.16011	0.1582	0.15692	0.15962	0.15675	0.16262	0.16594	0.16143	0.15934	0.17625	0.16287	0.15778	0.16845	0.16841	0.16959	0.16219	0.16175	0.16047	0.21082	0.19679	0.21562	0.27528	0.16722	0.20303	0.17056	0.16127	0.16695	0.1627	0.16386	0.1729	0.18834	0.20576	0.18565	0.19103	0.23455	0.17047	0.2693	0.1978	0.20325	0.20367	0.19507
454	0.15855	0.15998	0.16082	0.15955	0.15949	0.15991	0.16072	0.16346	0.16343	0.16162	0.16029	0.16294	0.1601	0.16629	0.1698	0.16507	0.16284	0.18086	0.1666	0.16118	0.17254	0.17245	0.17375	0.16586	0.16543	0.16399	0.21928	0.20326	0.22489	0.29892	0.17119	0.21023	0.17476	0.16491	0.17086	0.16639	0.16758	0.17721	0.19401	0.21337	0.19103	0.19692	0.24755	0.1747	0.28952	0.20438	0.21048	0.21095	0.20131
455	0.16189	0.16343	0.1643	0.16294	0.16283	0.16338	0.16421	0.16701	0.16687	0.16518	0.16377	0.16636	0.16357	0.17011	0.17383	0.16885	0.16647	0.18575	0.1705	0.16471	0.17684	0.1767	0.17812	0.16967	0.16926	0.16766	0.22891	0.21034	0.23568	0.32996	0.17536	0.21821	0.17919	0.16869	0.17496	0.17024	0.17145	0.18175	0.20016	0.22187	0.19683	0.20334	0.2634	0.17914	0.31509	0.21161	0.21849	0.21902	0.20815
456	0.16534	0.16702	0.16791	0.16645	0.16629	0.16698	0.16783	0.1707	0.17042	0.16887	0.16739	0.16991	0.16717	0.17411	0.17806	0.17281	0.17025	0.19097	0.17458	0.16837	0.18137	0.18117	0.18273	0.17366	0.17326	0.17147	0.24005	0.21816	0.24848	0.37159	0.17975	0.22713	0.18387	0.17264	0.17926	0.17426	0.17551	0.18656	0.20687	0.23149	0.20313	0.2104	0.28328	0.18385	0.34824	0.21963	0.22745	0.22806	0.2157
457	0.16892	0.17074	0.17165	0.17009	0.16986	0.17072	0.1716	0.17453	0.1741	0.17271	0.17115	0.17358	0.17091	0.17829	0.18251	0.17694	0.17419	0.19655	0.17885	0.17217	0.18616	0.1859	0.18762	0.17783	0.17746	0.17545	0.25318	0.22687	0.26402	0.42798	0.18437	0.23721	0.18884	0.17678	0.18379	0.17848	0.17976	0.19169	0.21425	0.24251	0.21002	0.21825	0.30896	0.18883	0.39221	0.22862	0.23758	0.23829	0.22414
458	0.17263	0.17461	0.17555	0.17387	0.17357	0.17461	0.17552	0.17853	0.17792	0.17672	0.17506	0.17739	0.17481	0.18269	0.18722	0.18128	0.17832	0.20257	0.18336	0.17614	0.19125	0.19091	0.19282	0.18222	0.18187	0.17963	0.269	0.23667	0.28335	0.50367	0.18928	0.24875	0.19414	0.18112	0.18859	0.18291	0.18423	0.19717	0.22247	0.25537	0.21765	0.22708	0.34305	0.19415	0.45133	0.23881	0.24918	0.25001	0.23368
459	0.17649	0.17865	0.17962	0.17781	0.17743	0.17868	0.17961	0.1827	0.18189	0.18092	0.17915	0.18136	0.17887	0.18734	0.19221	0.18585	0.18264	0.20909	0.18812	0.18029	0.19668	0.19626	0.19837	0.18684	0.18652	0.18401	0.28852	0.24783	0.30797	0.60076	0.1945	0.26214	0.19983	0.1857	0.19368	0.18759	0.18895	0.20307	0.23171	0.27061	0.22617	0.23715	0.3893	0.19984	0.53044	0.25054	0.26264	0.26365	0.24461
460	0.18051	0.18288	0.18388	0.18192	0.18145	0.18293	0.1839	0.18707	0.18604	0.18532	0.18343	0.18549	0.18313	0.19225	0.19752	0.19068	0.18719	0.2162	0.19316	0.18465	0.2025	0.20199	0.20434	0.19173	0.19145	0.18862	0.31322	0.2607	0.34001	0.71211	0.20008	0.27793	0.20596	0.19053	0.19912	0.19254	0.19396	0.20947	0.24224	0.28906	0.23581	0.2488	0.45254	0.20596	0.63154	0.26423	0.27852	0.27977	0.25733
461	0.18471	0.18731	0.18836	0.18622	0.18565	0.18739	0.18841	0.19165	0.19037	0.18996	0.18793	0.18981	0.1876	0.19749	0.20321	0.19579	0.19199	0.22401	0.19853	0.18923	0.20878	0.20816	0.21079	0.19693	0.19668	0.19351	0.34529	0.27576	0.38242	0.81436	0.20607	0.29688	0.21262	0.19566	0.20496	0.1978	0.1993	0.21644	0.25443	0.31182	0.24688	0.26252	0.53749	0.21258	0.74558	0.28049	0.29758	0.29916	0.27244
462	0.18912	0.19198	0.19307	0.19073	0.19005	0.19209	0.19315	0.19648	0.1949	0.19485	0.19267	0.19434	0.1923	0.20308	0.20934	0.20124	0.19707	0.23267	0.20428	0.19406	0.21558	0.21484	0.2178	0.20248	0.20227	0.19869	0.38793	0.29366	0.43884	0.87746	0.21256	0.32005	0.21991	0.20113	0.21127	0.20343	0.205	0.22412	0.26875	0.34048	0.25978	0.27893	0.6443	0.2198	0.84532	0.30021	0.3209	0.32296	0.29073
463	0.19374	0.1969	0.19804	0.19549	0.19467	0.19705	0.19817	0.20158	0.19967	0.20004	0.19767	0.19909	0.19727	0.20908	0.21597	0.20707	0.20247	0.24235	0.21046	0.19918	0.223	0.22213	0.22547	0.20842	0.20826	0.20422	0.44555	0.31531	0.51282	0.89064	0.21961	0.34897	0.22794	0.20698	0.21812	0.20946	0.21115	0.23265	0.28588	0.37717	0.27507	0.29893	0.75973	0.2277	0.89993	0.32461	0.35001	0.35277	0.31343
464	0.19862	0.20212	0.20331	0.2005	0.19954	0.20231	0.2035	0.20699	0.2047	0.20556	0.20299	0.2041	0.20253	0.21557	0.22319	0.21332	0.20825	0.25329	0.21714	0.20463	0.23114	0.23013	0.23392	0.21484	0.21472	0.21015	0.5232	0.34199	0.60499	0.86737	0.22733	0.3858	0.23689	0.21328	0.22561	0.21597	0.2178	0.24222	0.30677	0.42475	0.29353	0.32371	0.85329	0.23644	0.90361	0.35553	0.38708	0.39086	0.34232
465	0.20377	0.20767	0.20892	0.20583	0.20469	0.20791	0.20917	0.21274	0.21001	0.21147	0.20865	0.20939	0.20814	0.22262	0.23112	0.22008	0.21444	0.2658	0.2244	0.21045	0.24016	0.23898	0.24331	0.22179	0.22173	0.21654	0.62346	0.37547	0.70752	0.82481	0.23586	0.4335	0.24696	0.22009	0.23389	0.22303	0.22505	0.2531	0.33273	0.48652	0.31627	0.35492	0.89731	0.24617	0.87418	0.39559	0.43507	0.44034	0.38004
466	0.20924	0.21359	0.21492	0.21149	0.21015	0.21388	0.21524	0.21888	0.21564	0.2178	0.2147	0.215	0.21413	0.23035	0.2399	0.22742	0.22112	0.28027	0.23235	0.21669	0.25024	0.24887	0.25385	0.22938	0.22938	0.22347	0.73827	0.41815	0.79995	0.77282	0.24535	0.49573	0.25842	0.2275	0.24312	0.23076	0.23301	0.26563	0.36563	0.56503	0.34486	0.39473	0.89227	0.25711	0.8285	0.44839	0.49764	0.50491	0.43032
467	0.21507	0.21994	0.22136	0.21754	0.21597	0.2203	0.22177	0.22547	0.22164	0.22464	0.22121	0.22097	0.22057	0.23889	0.24971	0.23545	0.22836	0.29725	0.24113	0.22342	0.26159	0.26002	0.26578	0.23773	0.2378	0.23104	0.84062	0.47306	0.85781	0.71643	0.25602	0.57575	0.27166	0.23563	0.25352	0.23926	0.24183	0.28028	0.408	0.6585	0.38147	0.44576	0.85741	0.26953	0.77511	0.51823	0.57798	0.58746	0.4978
468	0.22131	0.22679	0.22831	0.22404	0.2222	0.22722	0.22883	0.23257	0.22805	0.23207	0.22825	0.22734	0.22752	0.2484	0.26078	0.24429	0.23627	0.31747	0.25088	0.23073	0.27452	0.27273	0.27944	0.24698	0.24712	0.23936	0.89773	0.54328	0.87185	0.65829	0.26815	0.6725	0.28717	0.2446	0.26538	0.24871	0.25171	0.29769	0.463	0.75491	0.42895	0.51042	0.80795	0.28378	0.71836	0.60798	0.67484	0.6856	0.58611
469	0.22802	0.23422	0.23586	0.23105	0.22891	0.23473	0.23651	0.24026	0.23494	0.24019	0.23589	0.23418	0.23506	0.2591	0.27341	0.2541	0.24495	0.34191	0.26183	0.23872	0.28941	0.2874	0.29527	0.25733	0.25754	0.2486	0.90195	0.62957	0.85195	0.59975	0.28209	0.77347	0.30566	0.25459	0.2791	0.25929	0.26288	0.31874	0.53364	0.83114	0.49058	0.58915	0.75151	0.30033	0.66052	0.71292	0.77544	0.78466	0.69194
470	0.23527	0.24231	0.24411	0.23866	0.23616	0.24293	0.24491	0.24863	0.24237	0.24911	0.24425	0.24155	0.24329	0.2713	0.28801	0.26508	0.25457	0.37193	0.27423	0.2475	0.30676	0.30452	0.31384	0.26902	0.2693	0.25894	0.87117	0.72531	0.81229	0.54149	0.29832	0.85284	0.32807	0.26581	0.2952	0.27128	0.27568	0.34462	0.62034	0.86756	0.56857	0.67687	0.69198	0.31979	0.60267	0.81272	0.85393	0.85838	0.79633
471	0.24315	0.25119	0.25318	0.24697	0.24405	0.25193	0.25417	0.25779	0.25043	0.25901	0.25346	0.24954	0.25235	0.28536	0.30511	0.27749	0.26532	0.40927	0.28844	0.25724	0.32724	0.3248	0.33591	0.28237	0.28272	0.27064	0.82335	0.81187	0.76221	0.48389	0.31748	0.88854	0.35572	0.27854	0.31441	0.28501	0.29054	0.37687	0.71577	0.86375	0.66038	0.75985	0.63135	0.34296	0.54533	0.87739	0.88865	0.88768	0.86832
472	0.25177	0.26101	0.26324	0.25611	0.25269	0.26188	0.26446	0.26789	0.25923	0.27007	0.26367	0.25823	0.26237	0.3018	0.32543	0.29165	0.27742	0.45609	0.3049	0.26813	0.35171	0.34913	0.36248	0.29779	0.29819	0.28405	0.76752	0.86574	0.70681	0.42722	0.34041	0.88133	0.39036	0.29313	0.33768	0.30095	0.30807	0.41738	0.80101	0.83317	0.75325	0.81934	0.5706	0.37087	0.48876	0.8927	0.8808	0.87634	0.89021
473	0.26127	0.27195	0.27447	0.26624	0.26223	0.27298	0.27598	0.27909	0.26888	0.28255	0.27509	0.26775	0.27356	0.32132	0.34993	0.30799	0.29119	0.51463	0.3242	0.28042	0.38131	0.37871	0.39483	0.31584	0.31626	0.29959	0.70813	0.87708	0.64891	0.37182	0.36823	0.84706	0.43419	0.31004	0.36628	0.31968	0.32905	0.46803	0.85355	0.78823	0.8249	0.84351	0.51028	0.40483	0.43312	0.86977	0.84626	0.84026	0.87098
474	0.27182	0.28424	0.28714	0.27756	0.27283	0.28546	0.28901	0.2916	0.27954	0.29676	0.28797	0.27823	0.28616	0.34487	0.37989	0.32706	0.30703	0.58594	0.34712	0.29443	0.41744	0.41505	0.43453	0.33725	0.33762	0.31786	0.64743	0.8552	0.59002	0.31829	0.40242	0.79921	0.48952	0.32989	0.40178	0.342	0.35455	0.52986	0.86454	0.73604	0.85749	0.8349	0.45076	0.4464	0.37861	0.82655	0.7983	0.7917	0.82926
475	0.28362	0.29817	0.30156	0.29031	0.28473	0.29962	0.30388	0.30567	0.29139	0.31311	0.30264	0.28986	0.30047	0.37373	0.41696	0.34958	0.32545	0.66717	0.37464	0.31059	0.4617	0.4599	0.48328	0.36297	0.3632	0.33965	0.58654	0.81447	0.53094	0.26761	0.44475	0.74469	0.5577	0.35345	0.44593	0.36896	0.38593	0.60136	0.84307	0.6804	0.85151	0.80406	0.3924	0.49714	0.32569	0.77358	0.74377	0.73699	0.77674
476	0.29695	0.31411	0.31815	0.30481	0.29821	0.31582	0.32102	0.32161	0.30468	0.33213	0.31949	0.30284	0.31687	0.40957	0.46301	0.37644	0.3471	0.7479	0.40802	0.32944	0.51557	0.51486	0.54228	0.39422	0.39418	0.36601	0.52604	0.76408	0.47219	0.22123	0.49709	0.68714	0.63664	0.38174	0.50017	0.40185	0.42485	0.67619	0.80275	0.62337	0.81974	0.76033	0.33583	0.55787	0.2752	0.71596	0.68625	0.67951	0.71899
477	0.31214	0.33254	0.33742	0.32149	0.31364	0.33456	0.341	0.3398	0.31969	0.35448	0.33906	0.31743	0.33586	0.45443	0.51974	0.40876	0.37283	0.81106	0.44872	0.35168	0.57935	0.58033	0.61088	0.43251	0.43198	0.39832	0.46628	0.70896	0.41421	0.18084	0.56053	0.62852	0.71756	0.41597	0.56454	0.44221	0.47299	0.74278	0.75269	0.56607	0.77405	0.70952	0.28203	0.62714	0.22847	0.65639	0.62768	0.62106	0.65894
478	0.32962	0.35404	0.36005	0.34084	0.33148	0.35643	0.36452	0.36067	0.33675	0.38102	0.36198	0.33394	0.35806	0.51032	0.58735	0.44776	0.40366	0.84209	0.49816	0.37822	0.65042	0.65338	0.68424	0.4794	0.47815	0.43822	0.4076	0.65172	0.35756	0.14779	0.63351	0.56981	0.78466	0.45755	0.63576	0.49148	0.53138	0.78817	0.69763	0.50908	0.72117	0.65498	0.23247	0.69903	0.18718	0.59631	0.56904	0.56257	0.59816
479	0.34995	0.37936	0.38685	0.36354	0.35234	0.38217	0.39244	0.38476	0.35631	0.41274	0.38906	0.35274	0.3842	0.57796	0.66206	0.49455	0.44076	0.83946	0.557	0.41014	0.72091	0.72532	0.75166	0.53598	0.53385	0.48746	0.35049	0.59382	0.30311	0.12248	0.70898	0.51154	0.82268	0.5077	0.70533	0.55024	0.59882	0.80535	0.64019	0.45277	0.66463	0.59862	0.18899	0.7622	0.15287	0.53643	0.51085	0.50454	0.53747
480	0.3738	0.40937	0.41878	0.3904	0.37697	0.41267	0.42579	0.41262	0.37885	0.45077	0.42121	0.37429	0.41518	0.65415	0.73376	0.54942	0.48522	0.81225	0.62364	0.44871	0.77825	0.78257	0.79956	0.60146	0.59855	0.54707	0.29582	0.53602	0.25218	0.10417	0.77362	0.45404	0.82738	0.56673	0.76078	0.6166	0.66967	0.79642	0.58187	0.39746	0.60647	0.54157	0.15317	0.80396	0.1262	0.4772	0.45343	0.44728	0.47734
481	0.40202	0.44505	0.45686	0.42236	0.4063	0.44887	0.46561	0.4448	0.40493	0.49606	0.45939	0.39905	0.45192	0.729	0.78794	0.61064	0.53753	0.77062	0.69225	0.49505	0.81081	0.81327	0.81906	0.67119	0.66816	0.61567	0.24493	0.47875	0.20646	0.091485	0.8133	0.39762	0.80565	0.63247	0.79153	0.68432	0.73315	0.76857	0.52348	0.34362	0.54782	0.48449	0.12564	0.81758	0.10669	0.41896	0.39708	0.39111	0.41818
482	0.43553	0.48722	0.50181	0.46039	0.44134	0.49158	0.51262	0.48165	0.43513	0.54878	0.50431	0.42755	0.49519	0.78694	0.81353	0.67297	0.59648	0.72109	0.75213	0.54953	0.81503	0.81475	0.81116	0.73523	0.73328	0.68702	0.1996	0.42234	0.16772	0.083003	0.8221	0.34273	0.76749	0.69851	0.79498	0.74254	0.77677	0.72878	0.46551	0.29202	0.48934	0.42791	0.10575	0.80563	0.093068	0.36215	0.34226	0.33651	0.36053
483	0.47522	0.53615	0.55349	0.50518	0.48303	0.541	0.56651	0.52308	0.46989	0.60729	0.55588	0.4602	0.54507	0.8154	0.80973	0.72755	0.65781	0.66737	0.7915	0.61048	0.79581	0.79292	0.78323	0.7812	0.7815	0.7493	0.16158	0.36717	0.13702	0.07756	0.80455	0.29017	0.72005	0.75424	0.77602	0.78004	0.79336	0.68187	0.4084	0.24385	0.43151	0.37234	0.092025	0.77558	0.083903	0.30752	0.28977	0.28435	0.30519
484	0.52157	0.59068	0.60984	0.55652	0.53172	0.59587	0.6248	0.56808	0.5093	0.66681	0.61223	0.49715	0.60013	0.81265	0.78381	0.76471	0.71362	0.61161	0.80404	0.67273	0.76106	0.75612	0.74298	0.80069	0.80362	0.7894	0.13183	0.31386	0.11424	0.074291	0.76965	0.24119	0.6675	0.78882	0.74198	0.79133	0.78441	0.63082	0.35267	0.20069	0.37483	0.31853	0.082882	0.73444	0.07797	0.25624	0.24087	0.23593	0.25344
485	0.57385	0.64707	0.6658	0.61221	0.58619	0.65226	0.68166	0.61422	0.55261	0.71917	0.66857	0.53795	0.65626	0.78641	0.74411	0.77907	0.75442	0.55504	0.79201	0.72718	0.71698	0.71048	0.69553	0.79412	0.79918	0.80098	0.11002	0.26346	0.098206	0.07258	0.72456	0.19748	0.61222	0.79753	0.69863	0.77903	0.75672	0.57748	0.29916	0.16411	0.32004	0.26762	0.077026	0.68682	0.074359	0.20994	0.19722	0.19295	0.207
486	0.62919	0.69874	0.71376	0.66724	0.64268	0.70345	0.72867	0.65746	0.59782	0.75541	0.71747	0.58115	0.70662	0.74573	0.69645	0.77137	0.77351	0.4984	0.76217	0.7639	0.66756	0.65984	0.6441	0.7677	0.7741	0.78669	0.09484	0.21742	0.087352	0.071981	0.67379	0.16068	0.55569	0.78294	0.64977	0.74966	0.71711	0.52301	0.24912	0.13509	0.26826	0.22111	0.073491	0.6356	0.072401	0.17039	0.16049	0.15705	0.16764
487	0.68163	0.73749	0.74586	0.71384	0.6941	0.74126	0.75777	0.69268	0.64116	0.77005	0.75085	0.62383	0.74317	0.69683	0.64423	0.74679	0.77038	0.44217	0.7212	0.77723	0.61516	0.60644	0.59052	0.72861	0.73575	0.75443	0.084655	0.17745	0.080266	0.072183	0.61986	0.13172	0.49876	0.75184	0.59769	0.70952	0.6703	0.46816	0.20424	0.11346	0.22103	0.18074	0.071612	0.58247	0.071633	0.1388	0.13159	0.129	0.13649
488	0.72329	0.75714	0.75761	0.74429	0.73206	0.75969	0.76517	0.71524	0.67766	0.76322	0.76377	0.66178	0.76021	0.64336	0.58958	0.71085	0.74904	0.38682	0.67366	0.7679	0.56128	0.55171	0.536	0.68196	0.68951	0.71123	0.078059	0.14492	0.075858	0.072958	0.5644	0.11037	0.44204	0.71037	0.54386	0.66291	0.61929	0.41352	0.16621	0.098149	0.18012	0.14783	0.070906	0.52852	0.071715	0.11523	0.11029	0.10847	0.11346
489	0.74725	0.7562	0.74953	0.75433	0.75034	0.75753	0.75251	0.72263	0.70236	0.73931	0.75639	0.69027	0.75686	0.58745	0.53376	0.66776	0.71503	0.33297	0.62233	0.74117	0.5068	0.49651	0.48124	0.63091	0.6387	0.66165	0.074004	0.12017	0.073351	0.074143	0.50838	0.095444	0.38611	0.66272	0.48926	0.6125	0.56592	0.35977	0.13609	0.087736	0.14689	0.12275	0.071037	0.4744	0.072406	0.098604	0.095392	0.094171	0.097324
490	0.75073	0.73762	0.72566	0.7447	0.74773	0.73795	0.72467	0.71515	0.71217	0.70371	0.73273	0.7056	0.73643	0.53037	0.47761	0.62028	0.67294	0.28154	0.56891	0.70296	0.45232	0.44142	0.42677	0.57737	0.58531	0.60842	0.071753	0.10241	0.072198	0.075622	0.45241	0.085388	0.33169	0.61145	0.43456	0.55995	0.51134	0.30778	0.11374	0.080903	0.12166	0.10472	0.071767	0.42059	0.073535	0.08734	0.085359	0.084576	0.086457
491	0.73561	0.70616	0.69074	0.71946	0.72741	0.70576	0.68663	0.69509	0.70676	0.66068	0.69771	0.70634	0.70372	0.47298	0.42174	0.57021	0.62584	0.2339	0.51449	0.65765	0.39834	0.38699	0.37309	0.5226	0.53063	0.5532	0.070782	0.090226	0.07201	0.07731	0.39705	0.078855	0.27985	0.55821	0.38043	0.50632	0.45638	0.25878	0.098034	0.076634	0.10362	0.092313	0.072926	0.36759	0.074978	0.079967	0.078842	0.078372	0.079381
492	0.70642	0.66615	0.6486	0.6834	0.69437	0.66527	0.64214	0.66548	0.68811	0.61302	0.65533	0.69345	0.66293	0.41596	0.36678	0.51868	0.57572	0.19173	0.45981	0.60804	0.34544	0.33389	0.3209	0.46739	0.47547	0.49708	0.070726	0.082154	0.07251	0.079149	0.34296	0.074828	0.23204	0.50402	0.32766	0.45237	0.40171	0.21434	0.087421	0.074201	0.091267	0.084079	0.074388	0.3161	0.076643	0.075353	0.074826	0.074578	0.074985
493	0.66768	0.62066	0.60183	0.64029	0.65295	0.61946	0.59361	0.62906	0.65923	0.56256	0.60831	0.66941	0.61699	0.36002	0.31358	0.46649	0.52385	0.15657	0.40544	0.55588	0.29448	0.28308	0.27122	0.4124	0.42047	0.44085	0.071324	0.077034	0.073504	0.081095	0.29108	0.07259	0.19	0.44959	0.27737	0.3987	0.34808	0.17608	0.080502	0.073086	0.083104	0.078843	0.076068	0.26714	0.07847	0.072702	0.072595	0.072505	0.072494
494	0.62282	0.57176	0.5522	0.59271	0.60623	0.57034	0.54265	0.58796	0.62297	0.5105	0.55846	0.63699	0.56788	0.3061	0.26333	0.41426	0.47114	0.12918	0.35204	0.50235	0.2467	0.23592	0.22546	0.35831	0.36626	0.38521	0.072388	0.074009	0.074847	0.083119	0.24271	0.071624	0.15523	0.39555	0.23102	0.34603	0.29649	0.14517	0.076204	0.072914	0.077924	0.075737	0.077901	0.22212	0.08041	0.071445	0.071635	0.071657	0.071353
495	0.57408	0.52079	0.50088	0.54237	0.55618	0.51926	0.49035	0.5437	0.58159	0.45771	0.50698	0.5986	0.51688	0.25554	0.2176	0.3626	0.41828	0.10915	0.30049	0.4483	0.20368	0.19406	0.18527	0.30602	0.31367	0.331	0.073785	0.072482	0.076441	0.085199	0.19954	0.071569	0.12835	0.34258	0.19027	0.29529	0.24828	0.12176	0.073772	0.073419	0.074864	0.074153	0.079843	0.18269	0.082434	0.071184	0.071584	0.071687	0.071177
496	0.52298	0.46873	0.44874	0.49043	0.50418	0.46714	0.43752	0.49742	0.53678	0.40488	0.45472	0.5561	0.46491	0.21002	0.17809	0.31233	0.36594	0.095237	0.25202	0.39445	0.16703	0.15903	0.15208	0.25678	0.26389	0.27936	0.075418	0.072023	0.078211	0.087324	0.16315	0.072164	0.10884	0.29164	0.15652	0.24778	0.20508	0.105	0.072668	0.074409	0.073311	0.073652	0.081863	0.1502	0.084519	0.071632	0.072181	0.072342	0.071686
497	0.47058	0.41634	0.39654	0.43779	0.45122	0.41473	0.38488	0.44993	0.48974	0.35277	0.4024	0.51084	0.41272	0.17128	0.14607	0.26457	0.31499	0.085927	0.20825	0.34159	0.1378	0.13161	0.12643	0.2122	0.21847	0.23181	0.077219	0.072328	0.080107	0.089482	0.13447	0.073224	0.095357	0.24404	0.13036	0.20512	0.16849	0.093507	0.072512	0.075747	0.072834	0.073926	0.08394	0.12516	0.08665	0.072588	0.073243	0.073445	0.072685
498	0.41773	0.36436	0.34507	0.38522	0.39813	0.36277	0.33325	0.40194	0.44141	0.30229	0.35076	0.46384	0.36102	0.14044	0.12182	0.22079	0.26658	0.079931	0.17081	0.29079	0.11594	0.11146	0.10778	0.17395	0.17911	0.19008	0.079138	0.07318	0.082093	0.091669	0.11329	0.074615	0.086375	0.20142	0.11126	0.16884	0.13943	0.085916	0.073035	0.077332	0.073126	0.074754	0.086058	0.10698	0.088818	0.073905	0.074635	0.074867	0.074033
499	0.36527	0.31372	0.29534	0.33362	0.34582	0.31217	0.28371	0.35414	0.3926	0.25473	0.30074	0.41593	0.31072	0.11749	0.10452	0.18258	0.2222	0.076284	0.14081	0.24342	0.1005	0.097405	0.09488	0.14319	0.14712	0.15566	0.081143	0.074422	0.084145	0.093882	0.098468	0.076242	0.080616	0.16534	0.097996	0.13992	0.1178	0.081118	0.074042	0.079096	0.073967	0.075976	0.088209	0.094416	0.091016	0.075479	0.076264	0.076516	0.075629
500	0.31417	0.26561	0.24868	0.2841	0.29537	0.26413	0.23767	0.30741	0.34418	0.21164	0.25361	0.3679	0.263	0.10137	0.092721	0.15119	0.18348	0.07431	0.11831	0.20113	0.090035	0.087983	0.086285	0.12006	0.12282	0.12913	0.083209	0.075942	0.086244	0.09612	0.08851	0.078037	0.077139	0.13677	0.089123	0.11831	0.10255	0.078314	0.075394	0.080986	0.075199	0.07748	0.090387	0.086049	0.093242	0.077236	0.078059	0.078326	0.0774
501	0.26571	0.22157	0.2067	0.23811	0.2482	0.22019	0.19677	0.26284	0.29715	0.17464	0.21092	0.32065	0.21936	0.090506	0.084959	0.12703	0.15171	0.073534	0.10238	0.1655	0.083199	0.081896	0.08078	0.10365	0.10544	0.10995	0.08532	0.07766	0.08838	0.098381	0.082053	0.079951	0.075288	0.11557	0.083414	0.10301	0.092225	0.076936	0.076991	0.082968	0.07671	0.079183	0.092588	0.0807	0.095494	0.079121	0.079974	0.080251	0.079295
502	0.22146	0.18322	0.17096	0.19732	0.20597	0.182	0.1625	0.22182	0.25279	0.14483	0.17427	0.27529	0.18144	0.083435	0.080065	0.10949	0.12731	0.073613	0.091574	0.1374	0.078948	0.078182	0.077476	0.092498	0.09356	0.096739	0.087465	0.079518	0.090546	0.10067	0.078081	0.08195	0.074601	0.10067	0.079961	0.09261	0.085487	0.076581	0.078762	0.085016	0.078418	0.081029	0.094811	0.077504	0.097771	0.081099	0.081974	0.082259	0.081278
503	0.18309	0.15185	0.1424	0.16319	0.17023	0.1508	0.1356	0.18582	0.21261	0.12232	0.14474	0.23319	0.15046	0.079048	0.077211	0.097333	0.10965	0.074303	0.084501	0.11662	0.076544	0.076163	0.075748	0.085192	0.085733	0.087976	0.089638	0.081476	0.092737	0.10298	0.075881	0.084011	0.074744	0.09062	0.078124	0.0858	0.081309	0.076956	0.080658	0.087115	0.080268	0.082977	0.097055	0.075852	0.10008	0.083142	0.084035	0.084326	0.083324
504	0.15182	0.1278	0.121	0.13644	0.14187	0.12692	0.11577	0.156	0.17804	0.10626	0.12243	0.19585	0.12673	0.076564	0.075814	0.089226	0.097455	0.075429	0.080097	0.10205	0.075463	0.075357	0.075149	0.080629	0.080799	0.082392	0.091835	0.083506	0.094951	0.10532	0.074949	0.086118	0.075479	0.084093	0.077444	0.081563	0.078959	0.077852	0.082643	0.089253	0.082218	0.084999	0.099321	0.075305	0.10241	0.085234	0.086142	0.086437	0.085416
505	0.12796	0.11043	0.10582	0.11675	0.12077	0.10971	0.1019	0.13277	0.15003	0.095311	0.10651	0.16453	0.10962	0.075433	0.075453	0.084054	0.089363	0.076863	0.077589	0.092255	0.075324	0.075416	0.075353	0.078012	0.077918	0.079058	0.094053	0.085589	0.097187	0.1077	0.074918	0.088259	0.076635	0.080078	0.077588	0.079164	0.077913	0.079118	0.084692	0.091423	0.08424	0.087076	0.10161	0.075546	0.10477	0.087362	0.088284	0.088583	0.087543
506	0.11082	0.098489	0.09553	0.103	0.10593	0.097897	0.0926	0.11571	0.12872	0.088133	0.095667	0.13982	0.097855	0.075264	0.075828	0.08098	0.084222	0.078517	0.076433	0.085925	0.075856	0.076089	0.07613	0.07678	0.076498	0.07732	0.096293	0.087712	0.099446	0.11011	0.075528	0.090429	0.078089	0.077845	0.078318	0.078077	0.077796	0.080649	0.086788	0.09362	0.086315	0.089193	0.10393	0.076349	0.10717	0.089518	0.090455	0.090757	0.089697
507	0.099078	0.090594	0.08882	0.093801	0.095924	0.090095	0.086609	0.10378	0.11338	0.083648	0.088563	0.12148	0.090082	0.075778	0.076728	0.079409	0.081183	0.080328	0.076243	0.082053	0.076868	0.077199	0.077315	0.076537	0.07612	0.076719	0.098555	0.089866	0.10173	0.11256	0.076595	0.092624	0.079756	0.076887	0.079466	0.07793	0.078341	0.082367	0.088921	0.095843	0.088431	0.091344	0.10627	0.077552	0.10961	0.091699	0.09265	0.092955	0.091874
508	0.09135	0.085604	0.08467	0.087888	0.089448	0.085171	0.082973	0.095795	0.10286	0.081081	0.084132	0.10854	0.085174	0.076777	0.078001	0.078915	0.079646	0.082249	0.07674	0.079927	0.07822	0.078621	0.078791	0.076997	0.076485	0.076926	0.10084	0.092047	0.10404	0.11505	0.077987	0.094841	0.081574	0.076837	0.080911	0.078453	0.079358	0.084221	0.091084	0.09809	0.090577	0.093522	0.10865	0.07904	0.11208	0.0939	0.094867	0.095176	0.094072
509	0.086492	0.08268	0.082342	0.084313	0.085479	0.082293	0.081013	0.090689	0.095938	0.079883	0.081603	0.099822	0.082306	0.07812	0.079537	0.079189	0.079181	0.08425	0.077726	0.079047	0.079814	0.080264	0.080472	0.077956	0.077377	0.077706	0.10315	0.09425	0.10637	0.11758	0.079608	0.09708	0.0835	0.077433	0.082568	0.079453	0.08071	0.086171	0.093272	0.10036	0.092751	0.095725	0.11106	0.080731	0.1146	0.096123	0.097107	0.097419	0.096289
510	0.083669	0.08123	0.081316	0.082401	0.08329	0.080875	0.08025	0.087661	0.091621	0.079661	0.080434	0.0942	0.080893	0.079707	0.08126	0.080012	0.079481	0.086309	0.079058	0.079054	0.08158	0.082064	0.0823	0.079269	0.078643	0.078892	0.10549	0.096476	0.10874	0.12017	0.081393	0.099341	0.085503	0.078489	0.084376	0.080793	0.0823	0.088192	0.095482	0.10266	0.094947	0.097951	0.11351	0.082566	0.11717	0.098366	0.099369	0.099685	0.098526
511	0.082296	0.08083	0.081217	0.081675	0.082369	0.080499	0.080339	0.086122	0.089171	0.080134	0.080233	0.09081	0.08052	0.081466	0.083116	0.081226	0.080324	0.088411	0.080637	0.079691	0.083469	0.083977	0.084234	0.080834	0.080175	0.080366	0.10786	0.098725	0.11114	0.12281	0.083294	0.10163	0.087563	0.07987	0.086293	0.082374	0.084059	0.090266	0.097716	0.10499	0.097166	0.1002	0.116	0.084505	0.1198	0.10063	0.10166	0.10197	0.10078
512	0.081967	0.081188	0.081787	0.081804	0.08236	0.080873	0.081042	0.085665	0.088072	0.081108	0.080731	0.089039	0.080895	0.08335	0.085069	0.082721	0.081557	0.090547	0.082394	0.080781	0.085447	0.085971	0.086244	0.08258	0.081899	0.082047	0.11026	0.101	0.11358	0.12552	0.08528	0.10394	0.089667	0.081486	0.088289	0.08413	0.085942	0.092382	0.099971	0.10734	0.099407	0.10248	0.11853	0.08652	0.12248	0.10292	0.10397	0.10429	0.10307
513	0.082366	0.082072	0.082821	0.082525	0.082986	0.08177	0.082171	0.085966	0.087918	0.082428	0.081714	0.088405	0.081791	0.08532	0.08709	0.084414	0.083063	0.092711	0.084274	0.082184	0.087489	0.088024	0.08831	0.084452	0.083756	0.083872	0.1127	0.10329	0.11605	0.12829	0.087326	0.10628	0.091804	0.083266	0.090344	0.08601	0.087912	0.09453	0.10225	0.10974	0.10167	0.10478	0.12112	0.08859	0.12523	0.10523	0.10631	0.10663	0.10537
514	0.083276	0.083326	0.084181	0.083664	0.084055	0.083033	0.083599	0.086802	0.088432	0.083994	0.083038	0.088576	0.083054	0.087352	0.089161	0.086247	0.084762	0.094898	0.086243	0.083809	0.089579	0.09012	0.090417	0.086414	0.085708	0.085798	0.11518	0.10562	0.11858	0.13114	0.089416	0.10865	0.093968	0.085161	0.092443	0.087977	0.089945	0.096707	0.10456	0.11216	0.10396	0.1071	0.12376	0.090701	0.12805	0.10758	0.10868	0.10901	0.1077
515	0.084548	0.084845	0.085775	0.085099	0.085442	0.084558	0.085241	0.088021	0.089423	0.085735	0.084607	0.089321	0.084578	0.08943	0.091269	0.088182	0.086598	0.097108	0.088277	0.085593	0.091706	0.092251	0.092558	0.088441	0.087728	0.087798	0.1177	0.10797	0.12115	0.13407	0.091542	0.11105	0.096157	0.087141	0.094577	0.09001	0.092027	0.098909	0.10689	0.11463	0.10627	0.10946	0.12646	0.092846	0.13096	0.10995	0.11108	0.11142	0.11007
516	0.086082	0.086554	0.087537	0.086748	0.087055	0.086271	0.087039	0.089517	0.090755	0.087603	0.086351	0.090479	0.08629	0.091544	0.093409	0.090192	0.088536	0.099339	0.090359	0.087491	0.093863	0.09441	0.094727	0.090518	0.089801	0.089853	0.12027	0.11035	0.12377	0.13709	0.093695	0.11349	0.098369	0.089182	0.096741	0.092092	0.094146	0.10114	0.10925	0.11714	0.10862	0.11185	0.12923	0.095019	0.13395	0.11236	0.11352	0.11387	0.11246
517	0.087802	0.0884	0.089422	0.088551	0.088831	0.088121	0.088948	0.091212	0.092333	0.089564	0.088222	0.091933	0.088139	0.093687	0.095574	0.092259	0.090547	0.10159	0.092479	0.089472	0.096046	0.096594	0.096921	0.092633	0.091913	0.091949	0.1229	0.11277	0.12645	0.14022	0.095873	0.11597	0.1006	0.09127	0.098932	0.094214	0.096297	0.10339	0.11165	0.1197	0.11099	0.11428	0.13207	0.097218	0.13704	0.1148	0.11601	0.11636	0.11489
518	0.089658	0.090347	0.091396	0.090466	0.090727	0.090072	0.09094	0.093054	0.094092	0.091594	0.090187	0.093604	0.090088	0.095854	0.097763	0.09437	0.092615	0.10387	0.094631	0.091517	0.098254	0.098802	0.099138	0.094779	0.094057	0.094078	0.12558	0.11523	0.1292	0.14346	0.098075	0.11849	0.10286	0.093395	0.10115	0.096369	0.098476	0.10567	0.11408	0.12231	0.1134	0.11674	0.13499	0.099441	0.14024	0.11728	0.11853	0.11889	0.11736
519	0.091607	0.092364	0.093434	0.092459	0.092705	0.092091	0.09299	0.094998	0.095973	0.093673	0.092217	0.095421	0.092105	0.098043	0.099974	0.096517	0.094725	0.10617	0.096808	0.093606	0.10049	0.10103	0.10138	0.096951	0.096228	0.096234	0.12833	0.11773	0.13202	0.14682	0.1003	0.12107	0.10514	0.09555	0.10339	0.09855	0.10068	0.10797	0.11655	0.12497	0.11584	0.11925	0.13801	0.10169	0.14356	0.11981	0.12111	0.12147	0.11987
520	0.093626	0.094435	0.095521	0.09451	0.094744	0.094164	0.095086	0.097019	0.097948	0.095792	0.094298	0.097349	0.094177	0.10025	0.10221	0.098694	0.096869	0.1085	0.099009	0.095732	0.10274	0.10329	0.10364	0.099147	0.098423	0.098413	0.13115	0.12027	0.13491	0.15032	0.10254	0.12369	0.10745	0.09773	0.10565	0.10076	0.10291	0.1103	0.11907	0.1277	0.11833	0.12181	0.14112	0.10396	0.14702	0.12239	0.12374	0.12411	0.12243
521	0.095699	0.096549	0.097648	0.096609	0.096833	0.096279	0.09722	0.099102	0.099994	0.097945	0.096419	0.099362	0.09629	0.10248	0.10446	0.1009	0.099043	0.11086	0.10123	0.097888	0.10502	0.10556	0.10593	0.10137	0.10064	0.10061	0.13405	0.12287	0.1379	0.15399	0.10481	0.12638	0.10979	0.099934	0.10794	0.10299	0.10516	0.11267	0.12163	0.1305	0.12086	0.12442	0.14435	0.10625	0.15063	0.12502	0.12643	0.12681	0.12504
522	0.097815	0.098699	0.099808	0.098745	0.09896	0.09843	0.099384	0.10123	0.1021	0.10013	0.098573	0.10144	0.098439	0.10474	0.10674	0.10313	0.10124	0.11326	0.10348	0.10007	0.10732	0.10787	0.10825	0.10361	0.10288	0.10284	0.13704	0.12552	0.14097	0.15783	0.1071	0.12913	0.11215	0.10216	0.11026	0.10525	0.10743	0.11506	0.12424	0.13338	0.12344	0.12708	0.14769	0.10858	0.15441	0.12771	0.12918	0.12957	0.12771
523	0.099966	0.10088	0.102	0.10091	0.10112	0.10061	0.10158	0.10341	0.10425	0.10233	0.10076	0.10357	0.10062	0.10701	0.10905	0.10539	0.10347	0.11568	0.10575	0.10228	0.10966	0.1102	0.11059	0.10587	0.10515	0.10508	0.14012	0.12823	0.14416	0.16188	0.10942	0.13195	0.11455	0.10441	0.11261	0.10753	0.10974	0.1175	0.12692	0.13634	0.12607	0.1298	0.15118	0.11093	0.15839	0.13046	0.132	0.13241	0.13044
524	0.10215	0.10308	0.10421	0.10311	0.10331	0.10282	0.10379	0.10561	0.10643	0.10457	0.10297	0.10574	0.10282	0.10932	0.11138	0.10767	0.10572	0.11815	0.10805	0.10451	0.11202	0.11256	0.11297	0.10816	0.10744	0.10735	0.14331	0.13101	0.14746	0.16616	0.11177	0.13485	0.11699	0.10669	0.11499	0.10984	0.11207	0.11997	0.12965	0.13939	0.12877	0.1326	0.15482	0.11332	0.16258	0.13329	0.1349	0.13532	0.13324
525	0.10435	0.10532	0.10646	0.10533	0.10552	0.10505	0.10604	0.10785	0.10865	0.10682	0.1052	0.10795	0.10506	0.11164	0.11374	0.10998	0.108	0.12066	0.11038	0.10677	0.11442	0.11495	0.11538	0.11048	0.10975	0.10965	0.14661	0.13386	0.15089	0.17072	0.11415	0.13783	0.11946	0.10899	0.11741	0.11218	0.11443	0.12248	0.13245	0.14254	0.13152	0.13546	0.15864	0.11574	0.16703	0.13619	0.13789	0.13832	0.13611
526	0.10659	0.10758	0.10872	0.10758	0.10776	0.10731	0.10831	0.11012	0.1109	0.10911	0.10746	0.11019	0.10731	0.114	0.11614	0.11232	0.1103	0.12322	0.11273	0.10905	0.11685	0.11738	0.11783	0.11283	0.1121	0.11197	0.15005	0.13679	0.15446	0.1756	0.11657	0.14091	0.12198	0.11132	0.11986	0.11455	0.11682	0.12505	0.13533	0.14581	0.13435	0.13841	0.16266	0.1182	0.17177	0.13918	0.14097	0.14142	0.13906
527	0.10885	0.10986	0.11102	0.10985	0.11003	0.1096	0.1106	0.11243	0.11319	0.11142	0.10975	0.11246	0.1096	0.11639	0.11857	0.11469	0.11264	0.12582	0.11512	0.11136	0.11932	0.11985	0.12032	0.1152	0.11447	0.11432	0.15363	0.13981	0.1582	0.18085	0.11902	0.14409	0.12455	0.11368	0.12235	0.11695	0.11925	0.12766	0.13829	0.1492	0.13725	0.14145	0.16692	0.1207	0.17685	0.14226	0.14415	0.14462	0.14211
528	0.11113	0.11217	0.11334	0.11215	0.11232	0.11191	0.11293	0.11476	0.1155	0.11376	0.11206	0.11477	0.11191	0.11882	0.12104	0.1171	0.115	0.12849	0.11754	0.1137	0.12184	0.12236	0.12285	0.11761	0.11688	0.1167	0.15738	0.14293	0.16213	0.18655	0.12151	0.14738	0.12716	0.11607	0.12489	0.1194	0.12172	0.13033	0.14134	0.15273	0.14024	0.14459	0.17144	0.12325	0.18233	0.14544	0.14745	0.14794	0.14525
529	0.11344	0.11452	0.1157	0.11448	0.11464	0.11426	0.11528	0.11712	0.11785	0.11613	0.11441	0.11711	0.11425	0.12128	0.12355	0.11954	0.1174	0.13121	0.12	0.11607	0.1244	0.12492	0.12543	0.12006	0.11933	0.11912	0.16132	0.14615	0.16628	0.19279	0.12405	0.1508	0.12983	0.1185	0.12748	0.12188	0.12423	0.13306	0.14449	0.15642	0.14332	0.14783	0.17628	0.12584	0.18829	0.14874	0.15088	0.15138	0.1485
530	0.11579	0.11689	0.11808	0.11684	0.11699	0.11663	0.11767	0.11953	0.12023	0.11854	0.11678	0.11948	0.11662	0.12379	0.1261	0.12203	0.11983	0.134	0.1225	0.11847	0.12701	0.12752	0.12807	0.12255	0.12182	0.12157	0.16546	0.14949	0.17067	0.1997	0.12663	0.15436	0.13257	0.12096	0.13012	0.1244	0.12679	0.13585	0.14775	0.16028	0.1465	0.1512	0.18149	0.12849	0.19481	0.15216	0.15445	0.15497	0.15187
531	0.11816	0.1193	0.12051	0.11923	0.11937	0.11904	0.12009	0.12196	0.12264	0.12098	0.11919	0.12188	0.11902	0.12634	0.12871	0.12455	0.1223	0.13686	0.12505	0.1209	0.12968	0.13018	0.13076	0.12508	0.12435	0.12406	0.16986	0.15296	0.17534	0.20746	0.12927	0.15808	0.13537	0.12347	0.13281	0.12697	0.1294	0.13872	0.15114	0.16434	0.1498	0.1547	0.18715	0.1312	0.20203	0.15573	0.15818	0.15873	0.15537
532	0.12057	0.12174	0.12296	0.12166	0.12178	0.12148	0.12254	0.12444	0.12509	0.12346	0.12164	0.12433	0.12147	0.12893	0.13137	0.12713	0.12481	0.13979	0.12764	0.12338	0.13241	0.1329	0.13351	0.12766	0.12693	0.1266	0.17454	0.15658	0.18036	0.21631	0.13197	0.16198	0.13824	0.12602	0.13557	0.12959	0.13205	0.14167	0.15466	0.16863	0.15322	0.15836	0.19336	0.13398	0.21011	0.15945	0.16208	0.16266	0.15903
533	0.12301	0.12423	0.12546	0.12413	0.12423	0.12397	0.12504	0.12696	0.12758	0.12599	0.12413	0.12681	0.12395	0.13158	0.13409	0.12975	0.12737	0.14282	0.13029	0.1259	0.1352	0.13569	0.13633	0.13029	0.12955	0.12918	0.17954	0.16035	0.18578	0.22659	0.13472	0.16608	0.14119	0.12863	0.13839	0.13227	0.13477	0.1447	0.15833	0.17318	0.15678	0.16218	0.20026	0.13682	0.21927	0.16335	0.16619	0.1668	0.16285
534	0.12549	0.12675	0.12801	0.12663	0.12672	0.1265	0.12758	0.12953	0.13012	0.12856	0.12666	0.12934	0.12647	0.13429	0.13687	0.13243	0.12998	0.14593	0.133	0.12846	0.13806	0.13854	0.13922	0.13298	0.13224	0.13181	0.18494	0.16431	0.19169	0.23882	0.13755	0.1704	0.14423	0.13128	0.14129	0.135	0.13755	0.14782	0.16218	0.17803	0.1605	0.1662	0.20802	0.13974	0.22985	0.16745	0.17052	0.17117	0.16686
535	0.12802	0.12933	0.1306	0.12918	0.12926	0.12907	0.13017	0.13214	0.1327	0.13118	0.12923	0.13191	0.12904	0.13706	0.13972	0.13517	0.13264	0.14915	0.13576	0.13107	0.14101	0.14147	0.1422	0.13572	0.13498	0.1345	0.19081	0.16847	0.19822	0.25373	0.14044	0.17497	0.14736	0.13399	0.14427	0.1378	0.1404	0.15105	0.16622	0.18324	0.16439	0.17044	0.21688	0.14274	0.24228	0.17177	0.17511	0.1758	0.17109
536	0.13059	0.13195	0.13324	0.13178	0.13184	0.1317	0.13282	0.13481	0.13533	0.13385	0.13186	0.13452	0.13166	0.1399	0.14265	0.13797	0.13536	0.15249	0.1386	0.13374	0.14403	0.14449	0.14526	0.13853	0.1378	0.13725	0.19724	0.17287	0.2055	0.27242	0.14342	0.17985	0.15059	0.13677	0.14733	0.14067	0.14332	0.15439	0.17048	0.18886	0.16849	0.17493	0.2272	0.14583	0.25722	0.17635	0.17999	0.18073	0.17556
537	0.13321	0.13462	0.13594	0.13443	0.13447	0.13437	0.13551	0.13754	0.13801	0.13658	0.13453	0.13719	0.13433	0.14281	0.14566	0.14085	0.13814	0.15595	0.14151	0.13646	0.14715	0.14759	0.14842	0.14141	0.14068	0.14007	0.20438	0.17753	0.21377	0.29644	0.14649	0.18506	0.15394	0.13961	0.15049	0.14362	0.14633	0.15785	0.17499	0.19498	0.17282	0.17972	0.23947	0.14902	0.27558	0.18123	0.18522	0.18601	0.18031
538	0.13588	0.13736	0.13869	0.13714	0.13715	0.13711	0.13827	0.14032	0.14075	0.13938	0.13727	0.13992	0.13706	0.1458	0.14876	0.1438	0.14099	0.15955	0.1445	0.13925	0.15037	0.1508	0.15168	0.14437	0.14364	0.14295	0.2124	0.18249	0.22331	0.32802	0.14965	0.19066	0.15742	0.14253	0.15375	0.14665	0.14942	0.16146	0.1798	0.2017	0.17741	0.18486	0.25442	0.15232	0.29874	0.18645	0.19084	0.1917	0.18538
539	0.13861	0.14015	0.14151	0.1399	0.13988	0.13991	0.14109	0.14318	0.14355	0.14224	0.14007	0.14271	0.13985	0.14887	0.15195	0.14683	0.14391	0.1633	0.14758	0.1421	0.1537	0.15411	0.15506	0.14742	0.14668	0.14591	0.22154	0.18779	0.23453	0.37019	0.15291	0.19673	0.16104	0.14552	0.15713	0.14977	0.15261	0.16522	0.18494	0.20915	0.1823	0.19041	0.27315	0.15574	0.32866	0.19206	0.19693	0.19786	0.19083
540	0.1414	0.14302	0.1444	0.14273	0.14268	0.14278	0.14398	0.1461	0.14641	0.14518	0.14294	0.14556	0.14271	0.15205	0.15526	0.14996	0.14691	0.16722	0.15075	0.14503	0.15715	0.15754	0.15857	0.15055	0.14982	0.14896	0.23216	0.19351	0.24802	0.42684	0.15629	0.20335	0.16481	0.14861	0.16064	0.15299	0.1559	0.16915	0.19049	0.21753	0.18755	0.19646	0.29728	0.15929	0.3682	0.19815	0.20357	0.20459	0.19672
541	0.14425	0.14595	0.14737	0.14562	0.14555	0.14572	0.14694	0.1491	0.14934	0.14819	0.14589	0.14848	0.14564	0.15532	0.15868	0.15318	0.15	0.17134	0.15403	0.14803	0.16074	0.16111	0.16222	0.15379	0.15306	0.1521	0.24471	0.19969	0.2646	0.50198	0.1598	0.21061	0.16876	0.15179	0.16428	0.15632	0.15932	0.17328	0.19652	0.22707	0.19323	0.20312	0.32917	0.16299	0.42135	0.20479	0.21087	0.212	0.20314
542	0.14718	0.14897	0.15042	0.1486	0.14849	0.14874	0.14999	0.15219	0.15236	0.1513	0.14891	0.15148	0.14865	0.15871	0.16223	0.15652	0.15319	0.17567	0.15742	0.15113	0.16448	0.16482	0.16602	0.15713	0.15641	0.15533	0.25989	0.20643	0.28543	0.597	0.16345	0.21867	0.17291	0.15507	0.16808	0.15977	0.16285	0.17764	0.20312	0.23811	0.19942	0.21053	0.37219	0.16685	0.49291	0.21209	0.21896	0.22022	0.21019
543	0.15018	0.15207	0.15355	0.15165	0.1515	0.15185	0.15313	0.15536	0.15545	0.1545	0.15202	0.15455	0.15175	0.16223	0.16593	0.15997	0.15647	0.18025	0.16094	0.15431	0.16838	0.1687	0.17	0.1606	0.15988	0.15867	0.27869	0.21383	0.31213	0.70462	0.16725	0.22769	0.17728	0.15847	0.17206	0.16335	0.16654	0.18224	0.21043	0.25109	0.20622	0.21887	0.43068	0.17089	0.58643	0.22021	0.22802	0.22945	0.21802
544	0.15327	0.15527	0.15679	0.15479	0.1546	0.15505	0.15636	0.15864	0.15863	0.1578	0.15523	0.15772	0.15494	0.16589	0.16978	0.16355	0.15987	0.1851	0.16459	0.1576	0.17247	0.17276	0.17418	0.1642	0.16348	0.16214	0.30259	0.22204	0.34699	0.80311	0.17123	0.2379	0.18191	0.162	0.17623	0.16708	0.17037	0.18714	0.2186	0.26663	0.21378	0.22838	0.50922	0.17513	0.69792	0.22933	0.23829	0.23993	0.22679
545	0.15645	0.15857	0.16012	0.15803	0.1578	0.15836	0.15971	0.16202	0.16191	0.16122	0.15854	0.16098	0.15824	0.16969	0.17381	0.16727	0.16339	0.19027	0.16841	0.161	0.17677	0.17702	0.17857	0.16794	0.16723	0.16573	0.33374	0.23122	0.39295	0.86498	0.1754	0.24962	0.18682	0.16566	0.18061	0.17097	0.17439	0.19237	0.22785	0.28557	0.22227	0.23938	0.60942	0.1796	0.80674	0.2397	0.25007	0.25198	0.23676
546	0.15972	0.16198	0.16358	0.16138	0.16109	0.16178	0.16316	0.16553	0.16529	0.16477	0.16196	0.16434	0.16164	0.17367	0.17804	0.17116	0.16705	0.19581	0.17239	0.16452	0.18129	0.18151	0.1832	0.17185	0.17115	0.16947	0.37532	0.24161	0.45334	0.87982	0.17978	0.26326	0.19208	0.16948	0.18525	0.17503	0.1786	0.198	0.23847	0.30907	0.23194	0.25226	0.72262	0.18433	0.88036	0.25165	0.26378	0.26606	0.24825
547	0.16311	0.16551	0.16716	0.16483	0.16448	0.16532	0.16675	0.16915	0.16879	0.16844	0.16551	0.16781	0.16517	0.17784	0.1825	0.17522	0.17086	0.20176	0.17656	0.16818	0.18608	0.18625	0.18812	0.17594	0.17525	0.17337	0.43167	0.2535	0.5306	0.8591	0.18441	0.2794	0.19772	0.17346	0.19018	0.1793	0.18303	0.20409	0.25084	0.33872	0.2431	0.26758	0.8236	0.18934	0.90203	0.26565	0.28001	0.28277	0.26174
548	0.16661	0.16918	0.17087	0.16842	0.168	0.169	0.17047	0.17292	0.17241	0.17227	0.16919	0.17141	0.16883	0.18223	0.1872	0.17948	0.17484	0.20821	0.18095	0.17199	0.19117	0.19129	0.19335	0.18023	0.17955	0.17744	0.50791	0.26731	0.62318	0.81863	0.18932	0.29883	0.20382	0.17764	0.19543	0.18379	0.18771	0.21072	0.26547	0.3767	0.25617	0.28607	0.88242	0.19469	0.88325	0.28237	0.29957	0.303	0.27788
549	0.17024	0.17299	0.17474	0.17214	0.17164	0.17282	0.17435	0.17685	0.17616	0.17627	0.17302	0.17514	0.17264	0.18685	0.19219	0.18396	0.179	0.21524	0.18557	0.17596	0.1966	0.19666	0.19894	0.18475	0.18408	0.18172	0.60713	0.28358	0.72071	0.7682	0.19454	0.32272	0.21046	0.18203	0.20106	0.18854	0.19267	0.21802	0.2831	0.42586	0.27176	0.30874	0.89087	0.20041	0.84294	0.30273	0.32361	0.32798	0.29763
550	0.17401	0.17697	0.17878	0.17601	0.17543	0.17681	0.1784	0.18094	0.18006	0.18045	0.17702	0.17901	0.17661	0.19175	0.19751	0.18868	0.18336	0.22295	0.19047	0.18011	0.20242	0.20242	0.20495	0.18953	0.18886	0.18622	0.72275	0.30307	0.80284	0.71296	0.20013	0.35269	0.21775	0.18665	0.20714	0.19357	0.19797	0.22613	0.30475	0.48939	0.29069	0.33694	0.86414	0.20658	0.7923	0.32809	0.35378	0.35949	0.32241
551	0.17793	0.18113	0.18301	0.18004	0.17937	0.18099	0.18264	0.18523	0.18413	0.18484	0.1812	0.18305	0.18075	0.19695	0.2032	0.19369	0.18796	0.23149	0.19567	0.18447	0.20869	0.20862	0.21145	0.19459	0.19394	0.19097	0.8294	0.32685	0.84976	0.6557	0.20613	0.39109	0.22583	0.19154	0.21374	0.19894	0.20364	0.23523	0.33185	0.56935	0.31415	0.37243	0.81905	0.21325	0.73689	0.36043	0.39242	0.40004	0.35433
552	0.18203	0.18548	0.18744	0.18426	0.18349	0.18536	0.18709	0.18972	0.18837	0.18946	0.18558	0.18726	0.1851	0.20252	0.20933	0.19901	0.19281	0.24103	0.20123	0.18905	0.21549	0.21534	0.21851	0.19998	0.19935	0.196	0.89304	0.35639	0.85704	0.59784	0.21261	0.4411	0.23488	0.19674	0.22097	0.20468	0.20975	0.24557	0.36639	0.66295	0.34376	0.41731	0.76495	0.22052	0.67961	0.40263	0.44275	0.453	0.39647
553	0.18632	0.19006	0.19211	0.18869	0.18779	0.18996	0.19177	0.19444	0.19281	0.19434	0.19019	0.19166	0.18967	0.20849	0.21596	0.2047	0.19796	0.25179	0.20718	0.19389	0.2229	0.22267	0.22624	0.20575	0.20514	0.20136	0.90258	0.39375	0.83474	0.54013	0.21967	0.50661	0.24515	0.20228	0.22896	0.21086	0.21637	0.25749	0.41103	0.75698	0.38175	0.47365	0.70661	0.22849	0.62192	0.45859	0.50862	0.52217	0.45303
554	0.19081	0.19489	0.19703	0.19334	0.19231	0.19481	0.19672	0.19942	0.19747	0.19951	0.19506	0.19628	0.19449	0.21494	0.22319	0.2108	0.20344	0.26407	0.2136	0.19902	0.23104	0.23072	0.23477	0.21196	0.21137	0.20709	0.87453	0.44165	0.79485	0.48297	0.2274	0.59069	0.25694	0.20821	0.23788	0.21756	0.22362	0.27144	0.46885	0.8287	0.43095	0.54242	0.64653	0.23731	0.56451	0.53273	0.59301	0.6097	0.52862
555	0.19554	0.2	0.20225	0.19825	0.19706	0.19995	0.20197	0.20469	0.20238	0.20501	0.20021	0.20113	0.19959	0.22196	0.23113	0.21739	0.2093	0.27826	0.22057	0.20448	0.24006	0.23964	0.24425	0.21867	0.21811	0.21325	0.82785	0.50326	0.74535	0.42667	0.23594	0.69089	0.2707	0.21461	0.24795	0.22487	0.23161	0.28803	0.54246	0.86069	0.49435	0.62143	0.58598	0.24713	0.50774	0.62718	0.69327	0.71068	0.62506
556	0.20053	0.20542	0.2078	0.20345	0.20208	0.20541	0.20756	0.21029	0.20755	0.21089	0.20568	0.20625	0.205	0.22965	0.23991	0.22454	0.2156	0.29488	0.22817	0.21032	0.25013	0.2496	0.25489	0.22598	0.22544	0.21992	0.77248	0.58103	0.69077	0.3716	0.24544	0.79172	0.28702	0.22153	0.25948	0.2329	0.24051	0.30806	0.63105	0.85422	0.57351	0.70252	0.52562	0.25818	0.45179	0.73453	0.79363	0.80665	0.73366
557	0.20582	0.21121	0.21373	0.20897	0.2074	0.21123	0.21353	0.21626	0.21304	0.21721	0.21153	0.21167	0.21077	0.23813	0.24973	0.23235	0.22241	0.31462	0.23652	0.21659	0.26147	0.26084	0.26696	0.234	0.23348	0.22717	0.71313	0.67313	0.63368	0.31837	0.25613	0.86547	0.30673	0.22908	0.27285	0.2418	0.25053	0.33261	0.72546	0.82254	0.66481	0.77141	0.46588	0.27074	0.39686	0.83085	0.8664	0.87066	0.8291
558	0.21145	0.21741	0.2201	0.21487	0.21306	0.21748	0.21995	0.22265	0.21886	0.22403	0.21779	0.21742	0.21696	0.24759	0.26081	0.24096	0.22981	0.33846	0.24578	0.22336	0.2744	0.27366	0.28078	0.24286	0.24236	0.23513	0.65224	0.76764	0.5755	0.26796	0.26827	0.8927	0.33093	0.23737	0.2886	0.25177	0.26195	0.36304	0.8058	0.77725	0.75468	0.8138	0.40715	0.28516	0.34331	0.88637	0.89266	0.88867	0.88217
559	0.21746	0.22409	0.22698	0.22119	0.21911	0.2242	0.22689	0.22952	0.22508	0.23144	0.22455	0.22355	0.22361	0.25823	0.27347	0.25051	0.23792	0.36766	0.25612	0.23072	0.28929	0.28846	0.29682	0.25273	0.25224	0.24392	0.59105	0.84173	0.51704	0.22182	0.28223	0.87866	0.36115	0.24653	0.30743	0.26306	0.27514	0.4009	0.8514	0.72501	0.82153	0.82447	0.35	0.30192	0.29187	0.89222	0.87804	0.86949	0.88594
560	0.22391	0.23131	0.23444	0.22801	0.2256	0.23149	0.23443	0.23695	0.23175	0.23954	0.23187	0.23011	0.23082	0.27035	0.28809	0.26121	0.24685	0.40393	0.26779	0.23876	0.30664	0.30576	0.31564	0.26384	0.26336	0.25373	0.53016	0.87597	0.45884	0.18161	0.29849	0.84056	0.3993	0.25675	0.33024	0.27599	0.2906	0.44766	0.85687	0.66945	0.8499	0.80861	0.29533	0.32164	0.24371	0.8635	0.8397	0.82933	0.85614
561	0.23086	0.23918	0.24259	0.23539	0.23262	0.23942	0.24268	0.24501	0.23892	0.24847	0.23984	0.23716	0.23865	0.28433	0.30523	0.27332	0.25679	0.44939	0.2811	0.24764	0.32713	0.32626	0.33804	0.27647	0.27598	0.26478	0.46996	0.87025	0.4014	0.14866	0.31767	0.79062	0.44758	0.26825	0.35818	0.29099	0.30899	0.50403	0.83252	0.61256	0.84176	0.77506	0.24452	0.34513	0.20045	0.81733	0.78968	0.77869	0.80938
562	0.2384	0.24781	0.25157	0.24345	0.24023	0.24812	0.25177	0.25382	0.24669	0.25837	0.2486	0.24478	0.24724	0.30067	0.32561	0.28717	0.26795	0.50631	0.29644	0.2575	0.35162	0.35088	0.36501	0.29101	0.29047	0.27738	0.41081	0.83821	0.34539	0.12338	0.34064	0.73494	0.50792	0.28132	0.39258	0.30864	0.33115	0.56888	0.79101	0.55542	0.80946	0.73089	0.19934	0.37345	0.16372	0.76278	0.73399	0.72293	0.75439
563	0.24663	0.25733	0.26151	0.25229	0.24856	0.25774	0.26186	0.2635	0.25514	0.26946	0.25827	0.25304	0.25671	0.32009	0.3502	0.3032	0.28059	0.576	0.31434	0.26856	0.38124	0.38083	0.39788	0.30794	0.30731	0.29191	0.35324	0.79222	0.2918	0.10503	0.36853	0.67675	0.58047	0.29634	0.4349	0.32969	0.35821	0.63783	0.74043	0.49862	0.76379	0.68063	0.16151	0.40793	0.13454	0.70433	0.67585	0.66498	0.69551
564	0.25568	0.26793	0.27264	0.26207	0.25773	0.26844	0.27316	0.2742	0.26438	0.282	0.26903	0.26206	0.26723	0.34351	0.38028	0.32198	0.29507	0.65633	0.33548	0.28109	0.41742	0.41763	0.43821	0.32793	0.32713	0.3089	0.29811	0.73922	0.24204	0.09229	0.40279	0.61777	0.66091	0.31379	0.48629	0.35513	0.39154	0.70254	0.68519	0.44255	0.71107	0.62705	0.13195	0.45011	0.11278	0.64435	0.61693	0.60636	0.63506
565	0.26569	0.27982	0.2852	0.27299	0.26792	0.28045	0.28594	0.28612	0.27456	0.29632	0.28113	0.27196	0.27901	0.37224	0.41751	0.34425	0.31186	0.73807	0.36078	0.29545	0.46178	0.46303	0.48769	0.35184	0.35076	0.32906	0.24677	0.68287	0.1979	0.083744	0.44521	0.55886	0.73782	0.33432	0.54672	0.3862	0.43269	0.75243	0.62774	0.38755	0.65475	0.57178	0.11029	0.50153	0.097359	0.58406	0.55809	0.54785	0.57424
566	0.27687	0.2933	0.29953	0.28528	0.27932	0.29406	0.30053	0.29948	0.28586	0.31286	0.29483	0.28289	0.29234	0.40795	0.4638	0.37095	0.33155	0.80446	0.39137	0.31209	0.51579	0.51861	0.54742	0.3808	0.37927	0.35334	0.20102	0.62519	0.16099	0.078244	0.49767	0.50049	0.79494	0.35875	0.61348	0.42438	0.483	0.77944	0.56947	0.33417	0.59681	0.51581	0.095189	0.56291	0.086839	0.52411	0.49979	0.48988	0.51371
567	0.28946	0.30872	0.31605	0.29925	0.29221	0.30963	0.31738	0.31457	0.29847	0.33218	0.3105	0.29505	0.30753	0.45271	0.52082	0.40322	0.35492	0.84002	0.42868	0.33162	0.57978	0.58461	0.6165	0.41623	0.41404	0.38297	0.16262	0.56725	0.13216	0.074929	0.56123	0.44295	0.82077	0.38812	0.6796	0.47111	0.54271	0.78207	0.51114	0.28325	0.53834	0.4598	0.085039	0.6325	0.079925	0.46488	0.44232	0.43276	0.4539
568	0.30378	0.32655	0.3353	0.3153	0.30695	0.32763	0.33705	0.33173	0.31266	0.35501	0.32859	0.30866	0.32503	0.50857	0.58872	0.44233	0.38294	0.84136	0.47422	0.35484	0.65105	0.65777	0.68965	0.45971	0.45661	0.41954	0.13256	0.50965	0.11099	0.073179	0.63428	0.38658	0.81556	0.42373	0.73463	0.52712	0.60933	0.7644	0.45326	0.23604	0.48004	0.40432	0.078463	0.70397	0.075605	0.40673	0.38602	0.37682	0.39524
569	0.32024	0.34737	0.35799	0.33394	0.32398	0.34865	0.36027	0.35137	0.32875	0.38225	0.34969	0.324	0.34537	0.57633	0.66361	0.48931	0.41676	0.81671	0.52918	0.38274	0.72174	0.72912	0.75586	0.51263	0.50845	0.46482	0.11052	0.45273	0.096206	0.072549	0.70974	0.33188	0.78787	0.46695	0.76872	0.59113	0.6761	0.73246	0.39631	0.19413	0.42241	0.35001	0.074423	0.76577	0.07314	0.35016	0.3314	0.32265	0.33835
570	0.33935	0.37195	0.38497	0.35582	0.34389	0.37343	0.38795	0.37399	0.34712	0.415	0.37452	0.34142	0.36923	0.65288	0.7352	0.5443	0.45759	0.77652	0.59322	0.41657	0.77909	0.7849	0.80163	0.57513	0.56998	0.52034	0.095153	0.39682	0.086253	0.072726	0.77418	0.27976	0.74659	0.51892	0.77804	0.658	0.73231	0.69134	0.3409	0.15902	0.36602	0.2978	0.072183	0.80545	0.072004	0.29599	0.27936	0.27123	0.28422
571	0.36178	0.40118	0.41724	0.38177	0.36743	0.40289	0.42115	0.40013	0.36825	0.45443	0.40393	0.3613	0.39742	0.72831	0.78898	0.60524	0.50628	0.72776	0.66259	0.45767	0.81156	0.81385	0.81892	0.64423	0.63884	0.58597	0.08484	0.34241	0.079802	0.07348	0.81365	0.23158	0.69758	0.57957	0.76538	0.71828	0.76778	0.64453	0.28797	0.13145	0.31169	0.24898	0.071221	0.81704	0.071822	0.24553	0.23125	0.22399	0.23433
572	0.38836	0.43608	0.45582	0.41275	0.39551	0.43804	0.46101	0.43034	0.39267	0.50148	0.43889	0.38411	0.43087	0.787	0.81392	0.66674	0.56254	0.67446	0.72851	0.50712	0.81546	0.81367	0.80919	0.71203	0.70788	0.65781	0.078154	0.29027	0.075844	0.074649	0.82211	0.18907	0.64431	0.64605	0.73679	0.76097	0.77794	0.59435	0.2389	0.1111	0.2606	0.20517	0.07117	0.80349	0.072322	0.20047	0.18881	0.18269	0.19049
573	0.42005	0.4776	0.50138	0.44979	0.42924	0.47984	0.50835	0.4651	0.42095	0.55608	0.48027	0.41036	0.47046	0.81612	0.80958	0.72002	0.6236	0.61888	0.77862	0.56488	0.79597	0.79079	0.78016	0.76634	0.76509	0.72595	0.074044	0.24166	0.07366	0.076116	0.80437	0.1538	0.58879	0.71093	0.69782	0.77934	0.76559	0.54223	0.19542	0.096758	0.21437	0.16799	0.071772	0.77249	0.073315	0.16256	0.15361	0.1488	0.15431
574	0.45788	0.52619	0.55364	0.49375	0.46967	0.52878	0.56299	0.50455	0.45362	0.61608	0.52851	0.44054	0.51675	0.81367	0.78321	0.75608	0.6833	0.56238	0.80329	0.62833	0.76096	0.75336	0.73928	0.79644	0.79889	0.77687	0.071753	0.1982	0.072736	0.077794	0.76929	0.12649	0.53228	0.76316	0.6524	0.77377	0.73683	0.48914	0.15913	0.087032	0.17472	0.13843	0.072837	0.73084	0.074659	0.13279	0.12636	0.12284	0.12649
575	0.50263	0.58099	0.61026	0.54466	0.51745	0.58399	0.62243	0.54813	0.49097	0.67584	0.58277	0.47497	0.56925	0.78752	0.74327	0.77003	0.7325	0.50572	0.80118	0.69071	0.71672	0.70742	0.69154	0.7993	0.80494	0.8004	0.070757	0.16155	0.072712	0.079625	0.72413	0.10662	0.47555	0.79266	0.60304	0.7499	0.69745	0.43579	0.13083	0.080677	0.14287	0.11636	0.074235	0.68297	0.076254	0.11089	0.10653	0.10411	0.10638
576	0.55415	0.63859	0.66599	0.60074	0.57191	0.64206	0.68074	0.59408	0.53268	0.72661	0.63988	0.51361	0.62545	0.74681	0.69542	0.76293	0.76291	0.44942	0.77793	0.74184	0.66715	0.6566	0.63993	0.77959	0.7873	0.79589	0.070686	0.13262	0.073331	0.081565	0.67327	0.09283	0.41921	0.79625	0.5514	0.71385	0.65148	0.38286	0.11011	0.076746	0.11893	0.10071	0.075868	0.63162	0.07803	0.095589	0.092778	0.091189	0.092517
577	0.61039	0.69252	0.71316	0.65737	0.62983	0.6964	0.72916	0.63908	0.57738	0.75962	0.69366	0.55564	0.67997	0.69786	0.64311	0.73948	0.7709	0.39394	0.74085	0.77227	0.61465	0.60314	0.58632	0.74464	0.75344	0.76991	0.071272	0.11124	0.074408	0.083584	0.61932	0.083611	0.3639	0.7778	0.49856	0.67025	0.60157	0.33113	0.095663	0.074551	0.10191	0.090065	0.077668	0.57848	0.079934	0.085299	0.083583	0.082598	0.083293
578	0.66629	0.73439	0.74419	0.70702	0.68467	0.73843	0.75925	0.67836	0.62213	0.77024	0.73595	0.59906	0.72509	0.64432	0.5884	0.70489	0.75848	0.33984	0.69549	0.77814	0.56069	0.54841	0.53183	0.70045	0.70976	0.73034	0.072329	0.096229	0.07581	0.085662	0.56385	0.077679	0.31049	0.74415	0.4453	0.62209	0.54939	0.28167	0.085966	0.073598	0.09031	0.083083	0.079587	0.52456	0.081931	0.078621	0.077666	0.07711	0.077382
579	0.7139	0.75733	0.75507	0.74144	0.72755	0.76117	0.76712	0.70688	0.66238	0.75989	0.75976	0.64036	0.75337	0.58829	0.53253	0.66316	0.73083	0.28803	0.6453	0.76242	0.50614	0.49324	0.47713	0.65078	0.66034	0.6828	0.073721	0.08609	0.077445	0.087784	0.50781	0.074089	0.26022	0.70113	0.39231	0.57126	0.49605	0.23588	0.079698	0.07354	0.082674	0.078736	0.081591	0.4705	0.083997	0.07451	0.074087	0.073834	0.073821
580	0.74507	0.75908	0.74646	0.75538	0.75105	0.76239	0.75447	0.72099	0.69291	0.73342	0.76252	0.67494	0.76107	0.53111	0.47635	0.61698	0.69301	0.2398	0.59241	0.73112	0.45161	0.43821	0.42274	0.59802	0.60766	0.63069	0.075351	0.079486	0.079245	0.089942	0.45183	0.072159	0.21469	0.65259	0.34035	0.51899	0.44233	0.19534	0.075864	0.074122	0.077866	0.076261	0.083656	0.41679	0.086114	0.072214	0.072165	0.072128	0.071919
581	0.75536	0.74238	0.72246	0.74891	0.75284	0.74502	0.72642	0.71985	0.70963	0.69614	0.74668	0.69832	0.74954	0.47362	0.42046	0.56807	0.6487	0.19683	0.53813	0.68988	0.39758	0.38386	0.36919	0.54358	0.55324	0.576	0.07715	0.075413	0.081162	0.09213	0.39648	0.071418	0.17559	0.60082	0.29045	0.4661	0.38894	0.16142	0.073766	0.075166	0.075074	0.075128	0.085766	0.36392	0.088271	0.071214	0.071429	0.071546	0.071201
582	0.74538	0.71203	0.68763	0.72584	0.73554	0.71403	0.68809	0.70498	0.71092	0.65201	0.71696	0.70763	0.72305	0.4165	0.36551	0.51761	0.60038	0.16071	0.48331	0.64257	0.34465	0.33089	0.31719	0.48843	0.49805	0.52003	0.07907	0.073138	0.083164	0.094344	0.3424	0.071522	0.14412	0.54731	0.24394	0.41324	0.3367	0.13478	0.072901	0.07654	0.073714	0.074949	0.087912	0.31261	0.09046	0.071136	0.071537	0.071764	0.071324
583	0.7195	0.67261	0.64566	0.6911	0.70429	0.67406	0.64325	0.67926	0.69789	0.60363	0.678	0.70249	0.68631	0.36046	0.31234	0.46637	0.54965	0.13233	0.42857	0.59161	0.29368	0.28027	0.26777	0.43326	0.44279	0.46365	0.081075	0.072146	0.085228	0.096583	0.29053	0.072232	0.12041	0.49301	0.2024	0.36108	0.28664	0.11506	0.072918	0.07815	0.073375	0.075452	0.090085	0.2639	0.092678	0.071715	0.07225	0.072555	0.072048
584	0.68265	0.62735	0.59908	0.64871	0.66378	0.62835	0.59436	0.64561	0.67327	0.55268	0.6331	0.68468	0.64293	0.30645	0.26216	0.41498	0.49758	0.1114	0.37453	0.53854	0.24593	0.23339	0.22239	0.37871	0.38806	0.40759	0.083141	0.072073	0.087337	0.098848	0.24221	0.073375	0.10352	0.43861	0.16728	0.31048	0.24018	0.10116	0.073564	0.079931	0.073765	0.076443	0.092283	0.21925	0.094923	0.072766	0.073395	0.073756	0.073202
585	0.63872	0.57845	0.54963	0.60146	0.61743	0.5791	0.54305	0.6064	0.64003	0.50032	0.58453	0.65685	0.59538	0.25579	0.21653	0.36407	0.44497	0.096776	0.32193	0.48443	0.20297	0.1919	0.18269	0.32558	0.3346	0.3526	0.085253	0.072654	0.089482	0.10114	0.19909	0.074826	0.091998	0.38472	0.13941	0.2626	0.1989	0.091747	0.074658	0.081833	0.074675	0.07778	0.094503	0.18028	0.097194	0.074151	0.074847	0.075247	0.074659
586	0.59036	0.52736	0.49847	0.55121	0.56743	0.52774	0.49042	0.56344	0.60074	0.44736	0.53377	0.62171	0.5453	0.21019	0.17718	0.31446	0.39248	0.086939	0.27187	0.43006	0.16643	0.1573	0.15005	0.27498	0.28342	0.29968	0.0874	0.073702	0.091656	0.10346	0.16279	0.076495	0.084419	0.33207	0.11861	0.21894	0.16426	0.085614	0.076072	0.083823	0.075954	0.079364	0.096745	0.14832	0.099492	0.075773	0.076517	0.076946	0.076332
587	0.53925	0.47509	0.44648	0.49918	0.51526	0.47524	0.43727	0.51799	0.55732	0.39449	0.48182	0.58144	0.49377	0.17139	0.14536	0.26723	0.34088	0.080562	0.22583	0.37618	0.13731	0.13032	0.12494	0.22841	0.23597	0.25022	0.089574	0.075084	0.093855	0.10581	0.1342	0.07832	0.079652	0.28168	0.10386	0.18107	0.13699	0.081845	0.077713	0.085878	0.077498	0.081125	0.099009	0.12378	0.10182	0.077563	0.078343	0.078791	0.078158
588	0.4866	0.4224	0.39442	0.44632	0.46197	0.42238	0.38435	0.47098	0.51116	0.34251	0.42944	0.53766	0.44161	0.1405	0.1213	0.22382	0.29118	0.076649	0.1855	0.32365	0.11558	0.11056	0.10675	0.18758	0.19395	0.20591	0.091773	0.076704	0.096078	0.10819	0.1131	0.080256	0.076886	0.23495	0.093807	0.15016	0.11679	0.07977	0.079516	0.087982	0.079229	0.083012	0.1013	0.10603	0.10418	0.079474	0.08028	0.080742	0.080092
589	0.4333	0.37008	0.3431	0.39343	0.40844	0.36991	0.33248	0.42317	0.46331	0.29242	0.37735	0.49158	0.38955	0.1175	0.10415	0.18578	0.2447	0.074491	0.15228	0.27367	0.10023	0.096799	0.094193	0.1539	0.15888	0.16841	0.093993	0.078493	0.098325	0.1106	0.09833	0.082271	0.075545	0.19353	0.087226	0.12647	0.10256	0.07891	0.081434	0.090125	0.081094	0.08499	0.10361	0.093785	0.10657	0.081469	0.082295	0.082768	0.082103
590	0.38018	0.319	0.29356	0.34138	0.35553	0.3187	0.28276	0.37523	0.41462	0.24557	0.32636	0.44411	0.33835	0.10135	0.092466	0.15433	0.20304	0.073583	0.12669	0.22774	0.089842	0.087594	0.085849	0.12794	0.13152	0.13872	0.096235	0.080401	0.10059	0.11306	0.088414	0.084343	0.07522	0.15893	0.083137	0.10932	0.092951	0.078917	0.083435	0.092301	0.083055	0.087035	0.10595	0.085652	0.10899	0.083525	0.084368	0.084848	0.08417
591	0.32818	0.27036	0.24715	0.29126	0.30433	0.26994	0.23663	0.32795	0.36592	0.20358	0.27755	0.39605	0.28903	0.090471	0.084789	0.12993	0.1677	0.073568	0.10818	0.18756	0.083062	0.081663	0.080525	0.10915	0.11152	0.11672	0.098499	0.082396	0.10289	0.11556	0.08199	0.086459	0.075618	0.1319	0.08083	0.097466	0.086695	0.079545	0.085497	0.094504	0.085086	0.08913	0.10833	0.080471	0.11146	0.085626	0.086484	0.08697	0.086277
592	0.27849	0.22567	0.20548	0.24449	0.25618	0.22515	0.19574	0.28229	0.31812	0.16798	0.23236	0.34823	0.24293	0.083392	0.079957	0.11208	0.1396	0.07419	0.095419	0.15451	0.078852	0.07806	0.077351	0.09619	0.097638	0.10132	0.10079	0.084452	0.10521	0.11811	0.078043	0.088607	0.076533	0.11208	0.079802	0.08956	0.082842	0.080617	0.087604	0.096735	0.087168	0.091264	0.11074	0.077396	0.11397	0.087762	0.088633	0.089124	0.088416
593	0.23265	0.18659	0.17008	0.20273	0.21274	0.186	0.16157	0.23954	0.27239	0.1397	0.1924	0.30161	0.20165	0.078995	0.077145	0.099603	0.11863	0.075266	0.086945	0.12907	0.076475	0.076119	0.075713	0.087584	0.088361	0.090956	0.1031	0.086555	0.10756	0.12071	0.075858	0.090783	0.077815	0.098284	0.07969	0.084507	0.080709	0.082006	0.089746	0.098991	0.089289	0.09343	0.11318	0.075827	0.11653	0.089924	0.090809	0.091305	0.090579
594	0.19234	0.15444	0.14188	0.16751	0.17564	0.15382	0.13483	0.20116	0.23013	0.11864	0.15911	0.25742	0.16672	0.076501	0.075774	0.091215	0.1038	0.076666	0.081538	0.11068	0.075409	0.075366	0.075176	0.082089	0.08239	0.084233	0.10544	0.088693	0.10995	0.12336	0.074933	0.092982	0.079359	0.089045	0.080232	0.081503	0.079809	0.083621	0.091917	0.10127	0.091441	0.095625	0.11567	0.075338	0.11914	0.092109	0.093009	0.093509	0.092765
595	0.15898	0.12967	0.12076	0.13967	0.1459	0.12904	0.11517	0.1685	0.19287	0.10375	0.13311	0.21711	0.139	0.075366	0.075434	0.085811	0.093735	0.078295	0.07832	0.097984	0.075284	0.075464	0.075427	0.078812	0.078775	0.080094	0.10781	0.090859	0.11237	0.12608	0.07491	0.095204	0.081089	0.083097	0.081242	0.079977	0.079792	0.085399	0.094114	0.10358	0.093621	0.097845	0.1182	0.075622	0.12182	0.094316	0.095232	0.095736	0.094971
596	0.13314	0.11171	0.1058	0.11902	0.12358	0.1111	0.10145	0.14235	0.16183	0.093685	0.11403	0.18213	0.11835	0.075195	0.075827	0.082559	0.08717	0.080088	0.07666	0.089567	0.075828	0.076166	0.076237	0.077113	0.076834	0.077786	0.11022	0.093051	0.11483	0.12887	0.075527	0.097447	0.082953	0.079492	0.082586	0.079508	0.080405	0.087295	0.096333	0.10592	0.095825	0.10009	0.12078	0.076457	0.12455	0.096543	0.097476	0.097985	0.097196
597	0.11432	0.099306	0.09566	0.10452	0.10775	0.098725	0.092256	0.12265	0.13755	0.087135	0.10074	0.15352	0.1038	0.075709	0.076738	0.080851	0.083113	0.081997	0.076111	0.084216	0.076848	0.077297	0.077446	0.076537	0.076086	0.07678	0.11266	0.095265	0.11733	0.13174	0.076599	0.099713	0.084911	0.077554	0.084168	0.079794	0.081464	0.089277	0.098577	0.1083	0.098051	0.10236	0.12342	0.077682	0.12736	0.098791	0.099743	0.10026	0.099442
598	0.10131	0.09108	0.08905	0.094766	0.097028	0.090524	0.086343	0.10859	0.11965	0.083096	0.091849	0.13153	0.093974	0.076707	0.078018	0.080252	0.080846	0.083989	0.076352	0.08104	0.078205	0.078733	0.078938	0.07676	0.076186	0.076699	0.11514	0.097501	0.11988	0.13469	0.077993	0.102	0.086939	0.076806	0.085921	0.080621	0.082843	0.091323	0.10084	0.11071	0.1003	0.10466	0.12612	0.079185	0.13025	0.10106	0.10203	0.10255	0.10171
599	0.092661	0.085854	0.084967	0.088456	0.090037	0.085317	0.082762	0.098988	0.10711	0.080848	0.086144	0.11556	0.087595	0.07805	0.07956	0.080448	0.079858	0.086042	0.077156	0.079412	0.079803	0.080386	0.080631	0.07755	0.076891	0.077275	0.11767	0.09976	0.12248	0.13773	0.079617	0.10432	0.089018	0.076906	0.087798	0.081833	0.08445	0.093418	0.10313	0.11315	0.10258	0.10699	0.12889	0.080887	0.13322	0.10336	0.10435	0.10488	0.104
600	0.087157	0.08277	0.082694	0.084607	0.085711	0.082247	0.080849	0.092713	0.098701	0.079881	0.082714	0.10451	0.083685	0.079637	0.081288	0.081212	0.079788	0.088139	0.078361	0.078891	0.081572	0.082194	0.082468	0.078745	0.078026	0.078318	0.12025	0.10204	0.12513	0.14088	0.081404	0.10666	0.091137	0.07761	0.089765	0.083322	0.086221	0.095554	0.10545	0.11564	0.10488	0.10934	0.13173	0.082731	0.1363	0.10567	0.1067	0.10723	0.10632
601	0.083857	0.08119	0.081693	0.082483	0.083251	0.080677	0.080107	0.088824	0.093296	0.079815	0.080885	0.097176	0.081513	0.081394	0.083146	0.082378	0.080359	0.090271	0.079846	0.079145	0.083462	0.084111	0.084407	0.080223	0.079461	0.079688	0.12288	0.10435	0.12785	0.14415	0.083305	0.10904	0.093287	0.078738	0.091798	0.085006	0.088109	0.097722	0.1078	0.11818	0.1072	0.11173	0.13465	0.084675	0.13948	0.10802	0.10907	0.10961	0.10866
602	0.082154	0.080706	0.081618	0.081615	0.082146	0.080201	0.080217	0.086677	0.090071	0.080403	0.080221	0.092553	0.080605	0.083276	0.0851	0.083836	0.081398	0.092431	0.081535	0.07996	0.085441	0.086108	0.08642	0.081906	0.081115	0.081293	0.12557	0.10669	0.13064	0.14754	0.085291	0.11145	0.095465	0.080173	0.093883	0.086833	0.090084	0.09992	0.11018	0.12076	0.10956	0.11416	0.13766	0.086692	0.14278	0.1104	0.11148	0.11203	0.11104
603	0.081585	0.080997	0.082197	0.081635	0.082001	0.080497	0.080928	0.085774	0.088405	0.081451	0.080384	0.089879	0.080594	0.085245	0.087121	0.085502	0.082766	0.094615	0.083368	0.081171	0.087483	0.088163	0.088489	0.083735	0.082923	0.083065	0.12833	0.10905	0.1335	0.15109	0.087337	0.1139	0.097668	0.081824	0.09601	0.088765	0.092123	0.10215	0.1126	0.1234	0.11195	0.11663	0.14077	0.088765	0.14621	0.11282	0.11393	0.11449	0.11345
604	0.081816	0.081836	0.083239	0.082282	0.082531	0.08134	0.082064	0.085761	0.087856	0.082827	0.081131	0.088612	0.081218	0.087277	0.089193	0.087317	0.084368	0.096822	0.085304	0.082663	0.089574	0.090261	0.090599	0.085666	0.084841	0.084955	0.13116	0.11145	0.13644	0.15479	0.089428	0.11638	0.099895	0.08363	0.098171	0.090772	0.094212	0.1044	0.11505	0.1261	0.11438	0.11914	0.144	0.090879	0.14979	0.11527	0.11642	0.11699	0.11589
605	0.082614	0.083063	0.08461	0.083374	0.08354	0.082571	0.083503	0.086381	0.088098	0.084435	0.082294	0.088343	0.082292	0.089356	0.091304	0.08924	0.086139	0.099051	0.087314	0.084353	0.091702	0.092394	0.092743	0.087672	0.086838	0.08693	0.13407	0.11389	0.13948	0.15869	0.091554	0.11892	0.10215	0.085546	0.10036	0.092837	0.09634	0.10668	0.11754	0.12887	0.11685	0.1217	0.14734	0.093026	0.15355	0.11776	0.11896	0.11954	0.11838
606	0.083813	0.084567	0.086215	0.08478	0.084888	0.084077	0.085155	0.087451	0.088901	0.086209	0.08375	0.088784	0.083687	0.091471	0.093445	0.091243	0.088029	0.1013	0.089379	0.086186	0.09386	0.094555	0.094914	0.089733	0.088893	0.088966	0.13707	0.11636	0.14262	0.1628	0.093708	0.1215	0.10442	0.087541	0.10258	0.094947	0.098501	0.10899	0.12008	0.13172	0.11936	0.12431	0.15083	0.095202	0.15749	0.1203	0.12154	0.12214	0.12091
607	0.085295	0.086266	0.087986	0.08641	0.086476	0.085778	0.086961	0.088842	0.090102	0.088102	0.085416	0.089727	0.085308	0.093614	0.095611	0.093306	0.090006	0.10358	0.091486	0.08812	0.096044	0.096742	0.09711	0.091836	0.090992	0.091048	0.14017	0.11888	0.14587	0.16716	0.095887	0.12414	0.10672	0.089594	0.10483	0.097093	0.10069	0.11133	0.12268	0.13464	0.12191	0.12697	0.15448	0.097402	0.16166	0.12289	0.12419	0.12479	0.12349
608	0.086979	0.088105	0.089876	0.088199	0.088234	0.087619	0.088876	0.090461	0.091587	0.09008	0.08723	0.091029	0.087091	0.095781	0.097801	0.095416	0.092047	0.10588	0.093626	0.090128	0.098253	0.098951	0.099329	0.093971	0.093125	0.093165	0.14337	0.12145	0.14925	0.1718	0.098088	0.12684	0.10905	0.091691	0.1071	0.099271	0.10291	0.11371	0.12532	0.13765	0.12452	0.1297	0.15831	0.099627	0.16608	0.12553	0.12689	0.1275	0.12613
609	0.088807	0.090045	0.091854	0.090102	0.090114	0.08956	0.09087	0.092246	0.093274	0.092122	0.089152	0.092585	0.08899	0.097971	0.10001	0.097563	0.094138	0.1082	0.095793	0.092191	0.10048	0.10118	0.10157	0.096134	0.095286	0.095311	0.1467	0.12407	0.15277	0.17679	0.10031	0.1296	0.11141	0.093823	0.10941	0.10148	0.10515	0.11612	0.12803	0.14076	0.12719	0.1325	0.16235	0.10188	0.17078	0.12824	0.12965	0.13029	0.12882
610	0.090738	0.092058	0.093896	0.092088	0.092082	0.091575	0.092924	0.09415	0.095107	0.094213	0.091152	0.094325	0.090973	0.10018	0.10225	0.099743	0.096268	0.11056	0.097985	0.094296	0.10274	0.10344	0.10384	0.098322	0.097472	0.097482	0.15016	0.12675	0.15645	0.18217	0.10256	0.13243	0.1138	0.095983	0.11174	0.10371	0.10742	0.11856	0.1308	0.14399	0.12992	0.13538	0.16664	0.10415	0.17583	0.131	0.13249	0.13314	0.13158
611	0.092744	0.094128	0.095988	0.094135	0.094115	0.093645	0.095024	0.096143	0.097048	0.096341	0.09321	0.096198	0.093019	0.10241	0.1045	0.10195	0.09843	0.11295	0.1002	0.096436	0.10502	0.10572	0.10613	0.10053	0.099681	0.099675	0.15378	0.12949	0.16031	0.18805	0.10483	0.13535	0.11623	0.098169	0.1141	0.10597	0.10972	0.12105	0.13365	0.14733	0.13271	0.13834	0.1712	0.10645	0.18128	0.13384	0.13541	0.13608	0.1344
612	0.094807	0.09624	0.098119	0.09623	0.096198	0.095757	0.097159	0.098204	0.099067	0.098502	0.095313	0.098168	0.095113	0.10466	0.10678	0.10419	0.10062	0.11537	0.10244	0.098603	0.10732	0.10802	0.10845	0.10277	0.10191	0.10189	0.15756	0.13231	0.16438	0.19453	0.10712	0.13835	0.1187	0.10038	0.1165	0.10826	0.11205	0.12359	0.13658	0.15081	0.13558	0.14139	0.1761	0.10877	0.1872	0.13676	0.13841	0.1391	0.13731
613	0.096914	0.098387	0.10028	0.098363	0.09832	0.097905	0.099325	0.10032	0.10115	0.10069	0.097452	0.10021	0.097244	0.10694	0.10909	0.10645	0.10284	0.11783	0.1047	0.1008	0.10966	0.11035	0.1108	0.10502	0.10417	0.10413	0.16155	0.13519	0.1687	0.20176	0.10944	0.14144	0.12121	0.10261	0.11894	0.11057	0.11441	0.12617	0.13959	0.15445	0.13853	0.14454	0.18141	0.11113	0.19371	0.13977	0.14151	0.14223	0.1403
614	0.099056	0.10056	0.10248	0.10053	0.10047	0.10008	0.10152	0.10247	0.10328	0.1029	0.099621	0.10231	0.099407	0.10924	0.11142	0.10875	0.10508	0.12034	0.10699	0.10301	0.11202	0.11272	0.11318	0.1073	0.10645	0.10639	0.16576	0.13816	0.1733	0.20996	0.11179	0.14465	0.12376	0.10487	0.12141	0.11292	0.1168	0.12881	0.1427	0.15826	0.14158	0.1478	0.18721	0.11352	0.20093	0.14287	0.14472	0.14546	0.14338
615	0.10123	0.10277	0.1047	0.10272	0.10266	0.10229	0.10374	0.10467	0.10545	0.10514	0.10182	0.10446	0.1016	0.11157	0.11378	0.11107	0.10735	0.12289	0.1093	0.10526	0.11442	0.11511	0.11559	0.10961	0.10875	0.10867	0.17023	0.14123	0.17823	0.21943	0.11417	0.14796	0.12637	0.10715	0.12393	0.1153	0.11923	0.1315	0.14593	0.16227	0.14472	0.1512	0.19361	0.11594	0.20905	0.14608	0.14804	0.14881	0.14657
616	0.10343	0.105	0.10694	0.10494	0.10487	0.10452	0.10598	0.10689	0.10765	0.10741	0.10404	0.10665	0.10382	0.11393	0.11618	0.11342	0.10965	0.12549	0.11164	0.10752	0.11685	0.11755	0.11804	0.11195	0.11108	0.11098	0.17501	0.14439	0.18358	0.23063	0.11658	0.15141	0.12903	0.10946	0.1265	0.11771	0.1217	0.13425	0.14927	0.1665	0.14798	0.15473	0.20077	0.1184	0.21831	0.1494	0.15149	0.15229	0.14987
617	0.10565	0.10726	0.10922	0.10718	0.1071	0.10677	0.10825	0.10915	0.10989	0.1097	0.10629	0.10887	0.10606	0.11632	0.11861	0.11581	0.11197	0.12814	0.11401	0.10982	0.11932	0.12002	0.12053	0.11431	0.11345	0.11332	0.18015	0.14766	0.18942	0.24418	0.11904	0.155	0.13176	0.11179	0.12912	0.12016	0.12421	0.13708	0.15275	0.171	0.15136	0.15843	0.20889	0.12091	0.22908	0.15286	0.15509	0.15593	0.15329
618	0.1079	0.10954	0.11152	0.10945	0.10936	0.10905	0.11055	0.11144	0.11216	0.11202	0.10856	0.11113	0.10833	0.11874	0.12108	0.11823	0.11432	0.13086	0.11642	0.11214	0.12184	0.12253	0.12307	0.11671	0.11584	0.11569	0.18572	0.15106	0.19588	0.26102	0.12153	0.15876	0.13455	0.11416	0.13179	0.12266	0.12676	0.13998	0.15638	0.17581	0.15488	0.16231	0.21826	0.12346	0.24185	0.15646	0.15886	0.15973	0.15686
619	0.11018	0.11185	0.11385	0.11175	0.11164	0.11136	0.11287	0.11376	0.11446	0.11437	0.11086	0.11341	0.11062	0.1212	0.12359	0.12069	0.11671	0.13363	0.11886	0.11448	0.1244	0.12509	0.12566	0.11914	0.11827	0.11809	0.19183	0.15459	0.20313	0.28248	0.12407	0.16269	0.13741	0.11656	0.13452	0.12519	0.12937	0.14296	0.16018	0.18097	0.15856	0.1664	0.22929	0.12606	0.25735	0.16022	0.1628	0.16372	0.16059
620	0.11248	0.11419	0.11621	0.11408	0.11396	0.1137	0.11523	0.11611	0.11679	0.11675	0.11319	0.11573	0.11295	0.12371	0.12615	0.12319	0.11913	0.13648	0.12134	0.11687	0.12701	0.1277	0.12829	0.12162	0.12074	0.12053	0.19859	0.15828	0.21139	0.3104	0.12665	0.16683	0.14035	0.11899	0.13732	0.12778	0.13202	0.14603	0.16418	0.18657	0.16241	0.17074	0.24259	0.12872	0.27659	0.16416	0.16695	0.16792	0.16449
621	0.11481	0.11656	0.1186	0.11643	0.1163	0.11607	0.11761	0.1185	0.11916	0.11917	0.11555	0.11809	0.1153	0.12626	0.12876	0.12574	0.1216	0.13941	0.12387	0.11928	0.12968	0.13036	0.13099	0.12413	0.12326	0.123	0.20619	0.16214	0.22098	0.34733	0.12929	0.17121	0.14337	0.12146	0.14019	0.13042	0.13474	0.14921	0.1684	0.19269	0.16647	0.17536	0.25905	0.13143	0.30108	0.16831	0.17133	0.17235	0.16859
622	0.11718	0.11896	0.12103	0.11882	0.11867	0.11847	0.12003	0.12092	0.12156	0.12162	0.11794	0.12047	0.11769	0.12885	0.13142	0.12833	0.1241	0.14242	0.12644	0.12173	0.13241	0.13309	0.13375	0.12669	0.12581	0.12552	0.21484	0.16619	0.23231	0.39664	0.13199	0.17584	0.1465	0.12398	0.14314	0.13311	0.13752	0.15249	0.17288	0.19945	0.17076	0.18033	0.27995	0.13421	0.33298	0.17269	0.17598	0.17707	0.17291
623	0.11957	0.12141	0.1235	0.12124	0.12108	0.12091	0.12249	0.12338	0.12399	0.12411	0.12037	0.12289	0.12011	0.1315	0.13414	0.13098	0.12664	0.14553	0.12907	0.12423	0.1352	0.13588	0.13657	0.1293	0.12842	0.12808	0.22486	0.17045	0.24598	0.46213	0.13474	0.18078	0.14972	0.12654	0.14617	0.13587	0.14037	0.15589	0.17767	0.207	0.17533	0.1857	0.3072	0.13706	0.37542	0.17733	0.18094	0.1821	0.1775
624	0.122	0.12389	0.12601	0.1237	0.12352	0.12339	0.12499	0.12588	0.12646	0.12665	0.12283	0.12535	0.12257	0.13421	0.13692	0.13368	0.12924	0.14874	0.13175	0.12676	0.13807	0.13874	0.13947	0.13197	0.13108	0.1307	0.2367	0.17496	0.26283	0.54654	0.13757	0.18608	0.15307	0.12915	0.14929	0.13869	0.14329	0.15943	0.18282	0.21556	0.18022	0.19157	0.34347	0.13998	0.4326	0.18229	0.18625	0.18749	0.18238
625	0.12447	0.12641	0.12856	0.1262	0.126	0.12591	0.12754	0.12843	0.12898	0.12924	0.12534	0.12785	0.12507	0.13698	0.13978	0.13645	0.13189	0.15205	0.13448	0.12934	0.14101	0.14167	0.14245	0.13469	0.1338	0.13336	0.25099	0.17975	0.28402	0.64743	0.14046	0.19178	0.15654	0.13182	0.15252	0.14158	0.1463	0.16312	0.1884	0.2254	0.18549	0.19805	0.39238	0.14299	0.50922	0.18759	0.19197	0.19331	0.18761
626	0.12698	0.12898	0.13116	0.12875	0.12853	0.12847	0.13013	0.13102	0.13154	0.13187	0.12789	0.1304	0.12761	0.13981	0.1427	0.13929	0.13459	0.1555	0.13729	0.13198	0.14403	0.14469	0.14552	0.13748	0.13658	0.13609	0.26865	0.18487	0.31117	0.75086	0.14344	0.19796	0.16015	0.13454	0.15586	0.14456	0.14939	0.16698	0.19448	0.23688	0.19121	0.20526	0.45827	0.14609	0.60754	0.19332	0.19817	0.19963	0.19325
627	0.12953	0.13159	0.13382	0.13134	0.13109	0.13109	0.13277	0.13366	0.13415	0.13456	0.13049	0.13299	0.1302	0.14272	0.14571	0.14219	0.13735	0.15908	0.14016	0.13467	0.14715	0.1478	0.14869	0.14033	0.13944	0.13887	0.29103	0.19035	0.34648	0.83152	0.14651	0.20471	0.16393	0.13733	0.15933	0.14762	0.15258	0.17103	0.2012	0.25048	0.19748	0.21338	0.54467	0.14929	0.72016	0.19953	0.20495	0.20655	0.19936
628	0.13213	0.13426	0.13653	0.13398	0.13371	0.13376	0.13547	0.13636	0.1368	0.13731	0.13314	0.13563	0.13284	0.14571	0.14881	0.14518	0.14018	0.16281	0.14312	0.13742	0.15037	0.15101	0.15196	0.14326	0.14236	0.14173	0.32011	0.19627	0.39272	0.86929	0.14967	0.21215	0.16788	0.14019	0.16293	0.15077	0.15588	0.1753	0.20867	0.26684	0.20441	0.22262	0.6499	0.1526	0.82271	0.20632	0.21241	0.21418	0.20604
629	0.13478	0.13699	0.1393	0.13668	0.13638	0.13648	0.13822	0.13912	0.13952	0.14013	0.13585	0.13832	0.13554	0.14878	0.15201	0.14826	0.14309	0.16671	0.14616	0.14023	0.15371	0.15433	0.15535	0.14627	0.14537	0.14466	0.35879	0.2027	0.45283	0.86541	0.15294	0.22041	0.17205	0.14312	0.16668	0.15403	0.1593	0.17982	0.21707	0.28686	0.21215	0.23327	0.75942	0.15602	0.88447	0.21382	0.22071	0.22269	0.21342
630	0.13749	0.13978	0.14213	0.13943	0.1391	0.13927	0.14105	0.14195	0.14229	0.14301	0.13861	0.14107	0.1383	0.15195	0.15532	0.15143	0.14607	0.1708	0.14928	0.14311	0.15716	0.15778	0.15887	0.14937	0.14847	0.14767	0.4111	0.20972	0.52868	0.83462	0.15632	0.2297	0.17644	0.14614	0.17061	0.1574	0.16284	0.18463	0.22665	0.31175	0.22089	0.24567	0.84505	0.15959	0.89567	0.22218	0.23004	0.23227	0.22164
631	0.14026	0.14264	0.14504	0.14225	0.14189	0.14212	0.14394	0.14484	0.14512	0.14598	0.14145	0.14388	0.14112	0.15523	0.15874	0.1547	0.14914	0.1751	0.15251	0.14607	0.16075	0.16135	0.16253	0.15257	0.15167	0.15077	0.48198	0.21748	0.61818	0.78953	0.15983	0.24025	0.1811	0.14924	0.17473	0.16089	0.16654	0.18978	0.23771	0.3432	0.23089	0.26032	0.88391	0.1633	0.87118	0.2316	0.24065	0.24321	0.23092
632	0.14309	0.14557	0.14803	0.14514	0.14474	0.14505	0.14691	0.14781	0.14802	0.14902	0.14435	0.14676	0.14401	0.15862	0.1623	0.15808	0.1523	0.17965	0.15585	0.14911	0.16449	0.16507	0.16635	0.15588	0.15497	0.15396	0.57538	0.22611	0.71147	0.73719	0.16347	0.2524	0.18607	0.15244	0.17908	0.16452	0.17039	0.19531	0.25068	0.38346	0.24251	0.27786	0.87783	0.16717	0.82841	0.24235	0.25287	0.25585	0.24153
633	0.14599	0.14858	0.15109	0.1481	0.14766	0.14806	0.14996	0.15086	0.151	0.15215	0.14733	0.14971	0.14698	0.16213	0.166	0.16159	0.15556	0.18446	0.15932	0.15224	0.16839	0.16896	0.17034	0.1593	0.15839	0.15726	0.6882	0.23581	0.79026	0.68145	0.16728	0.26662	0.19139	0.15575	0.18367	0.16831	0.17442	0.2013	0.26614	0.43539	0.2562	0.29917	0.84381	0.17123	0.77684	0.25482	0.26716	0.27071	0.25388
634	0.14897	0.15168	0.15425	0.15115	0.15065	0.15115	0.1531	0.15399	0.15406	0.15539	0.1504	0.15274	0.15003	0.16578	0.16986	0.16524	0.15893	0.18959	0.16291	0.15547	0.17248	0.17303	0.17453	0.16285	0.16194	0.16067	0.8005	0.24684	0.83678	0.62434	0.17126	0.28353	0.19713	0.15917	0.18854	0.17226	0.17866	0.20785	0.28492	0.50185	0.27264	0.32538	0.79553	0.17548	0.72124	0.26951	0.28418	0.28848	0.2685
635	0.15203	0.15487	0.15751	0.15428	0.15374	0.15434	0.15634	0.15722	0.1572	0.15873	0.15355	0.15586	0.15316	0.16959	0.17389	0.16904	0.16242	0.19507	0.16665	0.15881	0.17678	0.1773	0.17894	0.16654	0.16563	0.16421	0.87834	0.25955	0.84621	0.56696	0.17543	0.30404	0.20338	0.16272	0.19375	0.17641	0.18312	0.21506	0.30813	0.58396	0.29273	0.35789	0.74016	0.17997	0.66411	0.28717	0.30482	0.31015	0.28619
636	0.15517	0.15816	0.16087	0.15751	0.15691	0.15763	0.15969	0.16056	0.16043	0.16219	0.15681	0.15906	0.1564	0.17357	0.17813	0.17301	0.16605	0.20097	0.17056	0.16226	0.18131	0.18181	0.1836	0.17039	0.16947	0.16789	0.90205	0.2744	0.82679	0.50988	0.17981	0.32944	0.21022	0.16641	0.19934	0.18076	0.18784	0.2231	0.33735	0.67699	0.31771	0.39835	0.68148	0.18472	0.6067	0.30885	0.33038	0.33716	0.30812
637	0.15841	0.16156	0.16436	0.16084	0.16017	0.16103	0.16315	0.16401	0.16377	0.16577	0.16017	0.16236	0.15974	0.17773	0.18259	0.17717	0.16982	0.20735	0.17465	0.16584	0.1861	0.18657	0.18854	0.17441	0.1735	0.17172	0.88241	0.29203	0.78948	0.45346	0.18445	0.36156	0.21779	0.17026	0.20539	0.18536	0.19287	0.23214	0.37466	0.76588	0.34929	0.44839	0.62148	0.18976	0.54962	0.3361	0.36273	0.37156	0.33602
638	0.16176	0.16508	0.16797	0.16428	0.16355	0.16455	0.16674	0.16758	0.16721	0.1695	0.16365	0.16577	0.1632	0.18211	0.1873	0.18153	0.17376	0.2143	0.17894	0.16957	0.19119	0.19163	0.19379	0.17862	0.17771	0.17572	0.83973	0.31333	0.74199	0.39803	0.18935	0.40305	0.22625	0.17429	0.21199	0.19024	0.19824	0.24245	0.42272	0.82881	0.3897	0.50895	0.56119	0.19513	0.49318	0.3712	0.40449	0.41618	0.37244
639	0.16522	0.16874	0.17172	0.16785	0.16704	0.16821	0.17048	0.17129	0.17077	0.17339	0.16726	0.16929	0.16679	0.18673	0.1923	0.18613	0.17788	0.22192	0.18346	0.17345	0.19663	0.19702	0.19942	0.18306	0.18215	0.17992	0.78624	0.33953	0.68892	0.34407	0.19458	0.45744	0.23582	0.1785	0.21924	0.19542	0.20402	0.25437	0.48434	0.85247	0.44161	0.57899	0.50118	0.20089	0.43755	0.41739	0.45922	0.47471	0.42103
640	0.16881	0.17255	0.17564	0.17156	0.17066	0.17202	0.17437	0.17515	0.17447	0.17744	0.17102	0.17294	0.17051	0.19163	0.19762	0.191	0.18221	0.23034	0.18823	0.1775	0.20245	0.20281	0.20546	0.18774	0.18683	0.18432	0.7277	0.37236	0.63295	0.29238	0.20017	0.52874	0.24681	0.18293	0.22728	0.20097	0.21028	0.26833	0.5612	0.84082	0.50752	0.65367	0.44189	0.20708	0.38299	0.47894	0.53089	0.55073	0.48633
641	0.17253	0.17652	0.17972	0.17541	0.17441	0.17598	0.17843	0.17916	0.1783	0.1817	0.17493	0.17673	0.17439	0.19683	0.20332	0.19618	0.18676	0.23974	0.1933	0.18175	0.20872	0.20904	0.212	0.19269	0.19179	0.18897	0.66705	0.41416	0.57559	0.24417	0.20617	0.61917	0.2596	0.18761	0.23631	0.20695	0.2171	0.28494	0.65056	0.80674	0.5879	0.72322	0.38377	0.2138	0.32995	0.56011	0.6216	0.64463	0.5722
642	0.17641	0.18066	0.184	0.17943	0.17832	0.18013	0.18268	0.18336	0.18229	0.18617	0.17901	0.18067	0.17843	0.20239	0.20946	0.2017	0.19156	0.25033	0.1987	0.18622	0.21553	0.21579	0.21911	0.19796	0.19706	0.19389	0.60577	0.46793	0.51773	0.20103	0.21266	0.72308	0.27474	0.19256	0.24656	0.21341	0.22461	0.30498	0.74083	0.76054	0.67738	0.77523	0.32753	0.22111	0.27927	0.66099	0.72544	0.74703	0.67648
643	0.18045	0.18501	0.18849	0.18364	0.1824	0.18448	0.18715	0.18776	0.18645	0.19088	0.18328	0.18477	0.18267	0.20836	0.21611	0.20762	0.19666	0.2624	0.20448	0.19093	0.22295	0.22316	0.22689	0.20359	0.20269	0.19911	0.54462	0.53676	0.45998	0.16452	0.21972	0.81988	0.29296	0.19782	0.25836	0.22047	0.23297	0.32942	0.81181	0.70807	0.76118	0.801	0.27426	0.22914	0.23226	0.76903	0.82157	0.83465	0.78251
644	0.18468	0.18958	0.19323	0.18805	0.18667	0.18905	0.19186	0.19238	0.1908	0.19586	0.18777	0.18906	0.18711	0.21481	0.22335	0.21401	0.20209	0.27632	0.21069	0.19591	0.2311	0.23126	0.23549	0.20963	0.20874	0.20469	0.48404	0.62178	0.40288	0.13556	0.22746	0.88092	0.31525	0.20343	0.27211	0.22823	0.24235	0.35941	0.84672	0.65258	0.81927	0.80014	0.22555	0.23802	0.19059	0.85545	0.88155	0.88248	0.86009
645	0.18911	0.19441	0.19823	0.19268	0.19115	0.19387	0.19684	0.19725	0.19536	0.20116	0.1925	0.19355	0.19179	0.22183	0.23131	0.22095	0.2079	0.29259	0.21742	0.20121	0.24013	0.24023	0.24505	0.21616	0.21527	0.21068	0.42441	0.71722	0.34712	0.11396	0.236	0.89382	0.34291	0.20946	0.28834	0.23685	0.25301	0.39612	0.8446	0.59592	0.84009	0.77846	0.18322	0.24793	0.15581	0.89448	0.89355	0.88527	0.88857
646	0.19377	0.19951	0.20355	0.19757	0.19586	0.19898	0.20212	0.20239	0.20016	0.20681	0.1975	0.19826	0.19673	0.22951	0.24012	0.22853	0.21415	0.31189	0.22474	0.20687	0.25022	0.25027	0.25579	0.22325	0.22236	0.21714	0.36621	0.80546	0.2937	0.098617	0.24551	0.87015	0.37757	0.21595	0.30771	0.24651	0.26529	0.44046	0.81642	0.5391	0.82773	0.74283	0.14874	0.25908	0.12862	0.88671	0.86941	0.85681	0.87393
647	0.19868	0.20494	0.20921	0.20276	0.20083	0.20441	0.20775	0.20784	0.20521	0.21287	0.2028	0.20322	0.20196	0.23799	0.24997	0.23689	0.22091	0.33513	0.23276	0.21294	0.26159	0.26159	0.26797	0.23101	0.23011	0.22416	0.31025	0.86282	0.24403	0.08813	0.25621	0.82702	0.42113	0.22299	0.33103	0.25746	0.27958	0.49262	0.77336	0.48269	0.79378	0.69854	0.12252	0.27175	0.10862	0.85049	0.82611	0.81196	0.83455
648	0.20389	0.21073	0.21528	0.20826	0.2061	0.2102	0.21379	0.21364	0.21055	0.2194	0.20845	0.20846	0.20753	0.24745	0.2611	0.24618	0.22828	0.36356	0.24163	0.2195	0.27454	0.27452	0.28194	0.23955	0.23864	0.23183	0.25778	0.87762	0.19986	0.081216	0.26836	0.77452	0.47544	0.23068	0.35929	0.27001	0.29645	0.55138	0.72228	0.42708	0.74772	0.64908	0.10372	0.28632	0.094579	0.80068	0.77355	0.75898	0.78323
649	0.20942	0.21693	0.22181	0.21415	0.21171	0.21641	0.22028	0.21984	0.21622	0.22648	0.21449	0.21401	0.21348	0.25809	0.2738	0.2566	0.23636	0.39882	0.2515	0.22661	0.28947	0.28946	0.29815	0.24905	0.24812	0.24029	0.21053	0.85798	0.16283	0.07688	0.28234	0.71754	0.54141	0.23913	0.39363	0.28459	0.31661	0.61329	0.66704	0.37269	0.69512	0.59667	0.090817	0.30327	0.085078	0.74431	0.71658	0.70215	0.72608
650	0.21533	0.22363	0.22889	0.22046	0.21771	0.22311	0.22731	0.2265	0.22226	0.23421	0.22099	0.21992	0.21987	0.27022	0.28849	0.26841	0.24529	0.44297	0.2626	0.23439	0.30687	0.30693	0.31721	0.25971	0.25874	0.24969	0.17034	0.81842	0.13378	0.074393	0.29861	0.65875	0.61701	0.24849	0.43519	0.30174	0.34096	0.67217	0.60981	0.32013	0.63912	0.54268	0.082262	0.32322	0.078892	0.685	0.65784	0.64378	0.6663
651	0.22167	0.23088	0.2366	0.22727	0.22415	0.23036	0.23497	0.23367	0.22871	0.2427	0.228	0.22622	0.22676	0.2842	0.30572	0.28196	0.25526	0.49831	0.2752	0.24296	0.32742	0.32764	0.33989	0.27178	0.27076	0.26024	0.13841	0.76863	0.11238	0.073231	0.31783	0.59953	0.69466	0.25894	0.48472	0.32221	0.37067	0.72004	0.55183	0.27033	0.58157	0.48802	0.07682	0.347	0.075088	0.62469	0.59868	0.58507	0.60561
652	0.2285	0.23879	0.24506	0.23466	0.23111	0.23828	0.24338	0.24145	0.23565	0.25212	0.23562	0.23298	0.23423	0.30057	0.32622	0.29768	0.2665	0.56636	0.28967	0.25249	0.35201	0.35254	0.36724	0.28562	0.2845	0.27223	0.11471	0.71376	0.097377	0.073023	0.34083	0.54056	0.76073	0.27073	0.54181	0.34692	0.40703	0.74997	0.49384	0.22465	0.5235	0.43334	0.073585	0.3757	0.072991	0.56433	0.53979	0.52666	0.5449
653	0.23591	0.24749	0.25442	0.24274	0.23867	0.24697	0.25267	0.24992	0.24315	0.26266	0.24396	0.24025	0.24239	0.32002	0.35096	0.31617	0.2793	0.64561	0.30649	0.26319	0.38176	0.38285	0.40057	0.30169	0.30041	0.286	0.098032	0.65662	0.087249	0.073499	0.36876	0.48225	0.80137	0.28416	0.60362	0.37704	0.45125	0.75904	0.43635	0.18468	0.4656	0.37928	0.071917	0.41064	0.072117	0.50445	0.48155	0.4689	0.48469
654	0.244	0.25711	0.26487	0.25162	0.24695	0.25659	0.26304	0.2592	0.25128	0.27456	0.25313	0.24812	0.25135	0.3435	0.38126	0.33817	0.29405	0.72795	0.32627	0.27532	0.41812	0.4201	0.44148	0.32057	0.31906	0.30203	0.086754	0.59873	0.080666	0.074467	0.40307	0.42488	0.81101	0.29963	0.66399	0.41389	0.50389	0.74899	0.3799	0.15174	0.40844	0.32665	0.071362	0.45338	0.07212	0.44542	0.42426	0.4121	0.42538
655	0.25289	0.26786	0.27665	0.26148	0.25607	0.26732	0.27471	0.26944	0.26015	0.28815	0.26331	0.25668	0.26126	0.37231	0.41877	0.36459	0.31127	0.79735	0.34983	0.28924	0.46271	0.46605	0.49161	0.34308	0.3412	0.32096	0.079389	0.5409	0.076615	0.075787	0.44557	0.36882	0.79446	0.31764	0.71413	0.4587	0.56377	0.72412	0.32521	0.12627	0.35267	0.27652	0.071603	0.50542	0.072754	0.38762	0.36827	0.35666	0.36749
656	0.26274	0.27997	0.29007	0.27252	0.26623	0.2794	0.28799	0.2808	0.2699	0.30385	0.27468	0.26605	0.27232	0.40816	0.46541	0.39653	0.33161	0.83752	0.37825	0.30543	0.51699	0.52221	0.55198	0.37024	0.36784	0.34364	0.074797	0.48357	0.074361	0.077361	0.49809	0.3147	0.76037	0.33888	0.74597	0.51197	0.62675	0.68888	0.27336	0.10768	0.29919	0.23033	0.072411	0.56735	0.073841	0.33163	0.31422	0.3033	0.31179
657	0.27375	0.29377	0.30551	0.28499	0.27762	0.29315	0.30327	0.2935	0.28067	0.3222	0.28751	0.27636	0.28475	0.45313	0.52285	0.43508	0.3559	0.84297	0.41286	0.3245	0.58129	0.58872	0.62148	0.4034	0.40024	0.37123	0.072167	0.42707	0.073389	0.079115	0.56173	0.26356	0.71589	0.36421	0.75598	0.57245	0.68513	0.6468	0.22586	0.094698	0.24932	0.18974	0.073625	0.63724	0.075252	0.27845	0.26315	0.25316	0.2595
658	0.28617	0.30964	0.3235	0.29924	0.29056	0.30894	0.32107	0.30779	0.29267	0.34393	0.30211	0.28778	0.29887	0.50926	0.59112	0.48102	0.38513	0.82104	0.45519	0.34726	0.65279	0.66198	0.6944	0.4441	0.43993	0.4052	0.070931	0.37177	0.07333	0.081	0.63481	0.21693	0.6654	0.39473	0.7461	0.63566	0.72957	0.60035	0.18445	0.085951	0.20471	0.15612	0.075128	0.70832	0.076895	0.22953	0.2166	0.20787	0.2123
659	0.30033	0.32812	0.34468	0.3157	0.3054	0.32731	0.34203	0.324	0.30612	0.3699	0.31889	0.30051	0.31503	0.57735	0.66616	0.53414	0.42043	0.78234	0.50669	0.37474	0.72347	0.73271	0.7595	0.49389	0.48849	0.44731	0.070687	0.31827	0.073922	0.082979	0.71021	0.17657	0.61161	0.43175	0.72104	0.69356	0.75319	0.55122	0.15055	0.080288	0.16701	0.13	0.076836	0.7689	0.078704	0.18667	0.17631	0.16916	0.17201
660	0.31665	0.34985	0.36984	0.33494	0.32263	0.34889	0.36701	0.3425	0.32132	0.40121	0.33835	0.3148	0.33372	0.65423	0.73748	0.59222	0.46282	0.73442	0.56783	0.4082	0.78049	0.78712	0.80339	0.55348	0.54691	0.49927	0.071151	0.26756	0.07498	0.085026	0.77453	0.14385	0.55612	0.47666	0.68559	0.73656	0.75468	0.50055	0.12461	0.076842	0.1372	0.11088	0.078689	0.80672	0.080633	0.15144	0.14367	0.13822	0.13989
661	0.33569	0.37568	0.39992	0.35768	0.3429	0.37453	0.39706	0.36375	0.33862	0.43902	0.36115	0.33096	0.35554	0.72971	0.79042	0.65012	0.51272	0.68152	0.63638	0.44903	0.81235	0.81433	0.8187	0.62109	0.61403	0.56178	0.072122	0.22109	0.076369	0.087126	0.81378	0.11907	0.49994	0.53043	0.64335	0.75812	0.73763	0.44918	0.10589	0.074987	0.11508	0.097503	0.080646	0.81652	0.082648	0.12442	0.11895	0.11507	0.11593
662	0.35814	0.40659	0.43587	0.3848	0.36702	0.40522	0.43334	0.38827	0.35847	0.48432	0.38807	0.34934	0.38123	0.78817	0.81432	0.70031	0.5692	0.62614	0.70549	0.49837	0.81558	0.81264	0.80743	0.69057	0.68455	0.63253	0.073453	0.18056	0.077994	0.089266	0.82204	0.10137	0.44379	0.59261	0.59683	0.75741	0.70716	0.39783	0.092984	0.074271	0.099505	0.088505	0.082678	0.80163	0.084727	0.10494	0.10129	0.098684	0.09905
663	0.38488	0.44365	0.47844	0.41732	0.396	0.4421	0.47699	0.41663	0.38135	0.53735	0.42004	0.37038	0.41165	0.81674	0.80904	0.73512	0.62874	0.56969	0.7634	0.55627	0.79554	0.78875	0.77745	0.75068	0.7477	0.70368	0.07504	0.14738	0.079787	0.091439	0.80414	0.089252	0.38832	0.65948	0.5477	0.73857	0.66781	0.34728	0.084396	0.074378	0.088955	0.082699	0.084764	0.76982	0.086855	0.091525	0.089205	0.087537	0.087612
664	0.41697	0.48774	0.52765	0.4563	0.43103	0.48617	0.52853	0.44934	0.40784	0.59646	0.45799	0.39456	0.44774	0.81379	0.78204	0.75023	0.68483	0.51301	0.79852	0.62023	0.76015	0.75073	0.73603	0.78953	0.7909	0.76234	0.076809	0.122	0.081699	0.093641	0.76895	0.081243	0.3343	0.72278	0.49708	0.70697	0.6228	0.29849	0.078915	0.075075	0.082068	0.079183	0.08689	0.7277	0.089021	0.082607	0.081217	0.080223	0.080127
665	0.45551	0.53903	0.58198	0.50245	0.47323	0.53779	0.58686	0.48673	0.43851	0.65693	0.50268	0.42238	0.49029	0.78716	0.7417	0.74608	0.7291	0.45664	0.806	0.68375	0.71566	0.70448	0.68801	0.8011	0.80658	0.79611	0.078707	0.1037	0.083698	0.09587	0.72374	0.076175	0.28279	0.77111	0.44583	0.66707	0.5743	0.25268	0.075644	0.076197	0.077795	0.077303	0.089049	0.67959	0.091219	0.076905	0.076164	0.075648	0.07545
666	0.50135	0.59594	0.63747	0.55543	0.52319	0.59563	0.64788	0.52859	0.47376	0.71076	0.55402	0.4543	0.53949	0.74612	0.69365	0.7264	0.7547	0.40101	0.7895	0.73669	0.66594	0.65352	0.6363	0.78796	0.79625	0.80081	0.080697	0.091094	0.085759	0.098124	0.67288	0.073198	0.23524	0.79549	0.39464	0.62199	0.52375	0.2113	0.073946	0.077625	0.075382	0.07659	0.091235	0.62815	0.093445	0.073486	0.073198	0.07302	0.07276
667	0.55439	0.65407	0.68769	0.61281	0.57994	0.65538	0.70391	0.57378	0.51363	0.74892	0.61022	0.49051	0.5941	0.69699	0.64121	0.69564	0.75933	0.34669	0.75651	0.76927	0.61335	0.6	0.58265	0.75723	0.76702	0.78121	0.082754	0.082709	0.087868	0.1004	0.61892	0.071709	0.19331	0.79418	0.34429	0.57377	0.47215	0.17578	0.073368	0.079273	0.074293	0.076712	0.093444	0.57499	0.095698	0.071686	0.071717	0.071779	0.071481
668	0.6124	0.70595	0.72523	0.66908	0.63956	0.70933	0.74553	0.61967	0.55727	0.76563	0.66668	0.53072	0.65039	0.64331	0.58643	0.65746	0.74538	0.29451	0.71348	0.77718	0.55931	0.54526	0.52817	0.71555	0.72603	0.74543	0.084858	0.077364	0.090013	0.10271	0.56345	0.071281	0.15849	0.77209	0.29574	0.52375	0.4203	0.14703	0.073588	0.081079	0.074146	0.077428	0.095676	0.52109	0.097978	0.071037	0.071294	0.071527	0.071205
669	0.66987	0.74309	0.74469	0.71612	0.69453	0.74839	0.76583	0.66207	0.60247	0.76078	0.71596	0.57365	0.70174	0.58719	0.53054	0.61447	0.71755	0.24573	0.66457	0.76298	0.50472	0.49011	0.47352	0.66737	0.67813	0.70008	0.087	0.074185	0.092189	0.10505	0.50741	0.07161	0.13141	0.73617	0.25026	0.47285	0.36893	0.1251	0.074379	0.082999	0.074672	0.078569	0.09793	0.46708	0.10029	0.071211	0.071627	0.071982	0.071644
670	0.71835	0.75976	0.74485	0.74607	0.73551	0.76622	0.76374	0.69584	0.64535	0.73859	0.74997	0.61669	0.74009	0.52994	0.47434	0.56842	0.68026	0.20199	0.61231	0.73272	0.45015	0.43513	0.41921	0.61542	0.62625	0.64919	0.08917	0.07255	0.09439	0.10742	0.45145	0.072481	0.11161	0.69182	0.2093	0.42174	0.31892	0.10924	0.075577	0.085002	0.075677	0.080014	0.10021	0.41343	0.10262	0.071971	0.0725	0.072943	0.072594
671	0.74938	0.75555	0.72831	0.75502	0.75559	0.76228	0.74319	0.71656	0.68083	0.70432	0.76366	0.65579	0.75937	0.47241	0.41847	0.5205	0.63681	0.16491	0.55825	0.6921	0.39611	0.38087	0.36576	0.56139	0.57219	0.59511	0.091366	0.072016	0.096617	0.10983	0.3961	0.073739	0.097805	0.64245	0.17428	0.37111	0.27142	0.098237	0.077065	0.087068	0.077025	0.081674	0.10251	0.36067	0.10499	0.073149	0.07376	0.074264	0.073907
672	0.75847	0.7341	0.69922	0.74406	0.75332	0.74045	0.70966	0.72203	0.70404	0.66226	0.75691	0.6862	0.75806	0.41526	0.36355	0.47154	0.58946	0.13555	0.5034	0.64516	0.34318	0.32802	0.31391	0.50638	0.51709	0.53939	0.093584	0.072267	0.098867	0.11227	0.34203	0.075271	0.088545	0.59023	0.14608	0.32172	0.22782	0.090895	0.078759	0.089181	0.078616	0.083489	0.10484	0.30951	0.10739	0.074625	0.075293	0.075841	0.075478
673	0.74699	0.70049	0.66145	0.71772	0.73256	0.70616	0.66775	0.7129	0.71221	0.61525	0.73377	0.70396	0.73926	0.35921	0.31045	0.42216	0.5397	0.11373	0.44844	0.59435	0.29226	0.27758	0.26473	0.45114	0.4617	0.48299	0.095824	0.073082	0.10114	0.11475	0.29018	0.076999	0.082578	0.53649	0.12467	0.27463	0.18964	0.086233	0.0806	0.091333	0.080381	0.085416	0.1072	0.26103	0.10984	0.076313	0.077023	0.077601	0.077231
674	0.71961	0.65888	0.61791	0.68076	0.69865	0.66382	0.62058	0.69161	0.7053	0.56522	0.6991	0.7072	0.70767	0.30523	0.2604	0.37301	0.48858	0.098365	0.39394	0.54133	0.24459	0.23097	0.21968	0.39629	0.40663	0.42667	0.098086	0.074298	0.10344	0.11728	0.24189	0.078866	0.078959	0.48211	0.10924	0.23119	0.15807	0.083505	0.082545	0.093517	0.08227	0.087425	0.10959	0.2167	0.11232	0.07815	0.078891	0.079491	0.079115
675	0.68148	0.61221	0.57066	0.63693	0.65625	0.61646	0.57022	0.66114	0.68545	0.51344	0.65694	0.6965	0.6676	0.25464	0.21497	0.32482	0.43688	0.087983	0.34061	0.4872	0.20178	0.18983	0.18042	0.34258	0.35257	0.37115	0.10037	0.075799	0.10577	0.11987	0.19882	0.080832	0.077007	0.42776	0.098567	0.19287	0.13352	0.082164	0.084567	0.095731	0.084248	0.089494	0.11202	0.17815	0.11485	0.080093	0.080857	0.081473	0.081089
676	0.63649	0.56238	0.52105	0.58872	0.60851	0.566	0.51798	0.62415	0.65569	0.46081	0.61007	0.67417	0.62213	0.20916	0.17588	0.2786	0.38529	0.081217	0.28939	0.43276	0.16544	0.15566	0.14828	0.291	0.30041	0.31734	0.10268	0.077503	0.10813	0.1225	0.16258	0.082869	0.076245	0.37404	0.091469	0.1609	0.11547	0.08182	0.086645	0.097972	0.086291	0.09161	0.11449	0.14666	0.11743	0.082112	0.082894	0.083521	0.083129
677	0.58721	0.51068	0.4701	0.5378	0.55746	0.51373	0.46481	0.58267	0.6188	0.40805	0.56029	0.64301	0.57328	0.1705	0.14433	0.23563	0.33464	0.077036	0.24165	0.37877	0.13653	0.12908	0.12362	0.24293	0.25147	0.26649	0.10502	0.079352	0.11053	0.1252	0.13402	0.084957	0.076335	0.32175	0.08698	0.13578	0.1028	0.082193	0.088765	0.10024	0.088383	0.093764	0.11701	0.12255	0.12006	0.084186	0.084983	0.085619	0.085217
678	0.53533	0.45804	0.41861	0.48536	0.5045	0.46058	0.41149	0.53819	0.577	0.35593	0.50884	0.6055	0.52242	0.13977	0.12051	0.19735	0.28595	0.07469	0.19903	0.32611	0.11498	0.10966	0.10582	0.20005	0.20738	0.22021	0.10739	0.081304	0.11295	0.12797	0.11295	0.087085	0.077029	0.27198	0.084373	0.11713	0.094255	0.083078	0.090919	0.10254	0.090514	0.095951	0.11957	0.10516	0.12276	0.0863	0.087111	0.087754	0.087341
679	0.48205	0.40525	0.36739	0.43229	0.45066	0.40733	0.35879	0.4918	0.53191	0.30541	0.45659	0.56359	0.47053	0.11695	0.10359	0.16501	0.24057	0.073646	0.1631	0.27596	0.099797	0.096197	0.093573	0.16393	0.16979	0.1802	0.10979	0.083329	0.11542	0.13081	0.098224	0.089243	0.078152	0.22618	0.083113	0.10396	0.088728	0.084329	0.093102	0.10486	0.092676	0.098166	0.12218	0.093205	0.12552	0.088446	0.08927	0.089919	0.089493
680	0.42824	0.35309	0.31734	0.37941	0.3968	0.35473	0.30767	0.44429	0.48473	0.25771	0.40427	0.51875	0.41834	0.10098	0.092098	0.13932	0.20006	0.073525	0.13482	0.22982	0.089548	0.087208	0.085456	0.13552	0.13983	0.14783	0.11223	0.085408	0.11794	0.13374	0.088348	0.091427	0.079579	0.18603	0.082816	0.095002	0.085362	0.08584	0.09531	0.10722	0.094864	0.10041	0.12486	0.085284	0.12836	0.090616	0.091455	0.092109	0.091667
681	0.37474	0.30255	0.26967	0.32764	0.34381	0.30376	0.2594	0.39635	0.43633	0.21444	0.35259	0.47201	0.36655	0.090213	0.084539	0.12004	0.16588	0.074072	0.11396	0.18938	0.082853	0.081417	0.08028	0.11457	0.1175	0.12336	0.11471	0.087528	0.1205	0.13675	0.081937	0.093634	0.081226	0.15295	0.083217	0.089126	0.083558	0.087543	0.097542	0.10962	0.097078	0.10268	0.1276	0.080242	0.13128	0.092809	0.093662	0.094322	0.093863
682	0.32251	0.25495	0.22588	0.27818	0.29286	0.25574	0.21559	0.34868	0.38753	0.17719	0.30249	0.4242	0.31604	0.083192	0.079785	0.10622	0.1388	0.075099	0.099318	0.15606	0.0787	0.077914	0.077214	0.099883	0.10172	0.1059	0.11723	0.08968	0.12311	0.13987	0.077997	0.095863	0.08303	0.12745	0.084121	0.085492	0.082885	0.089384	0.099799	0.11205	0.099317	0.10498	0.13041	0.077269	0.13429	0.095023	0.095892	0.096557	0.096078
683	0.27282	0.21191	0.18759	0.23254	0.24539	0.21229	0.17789	0.30215	0.33919	0.14711	0.2552	0.37613	0.26794	0.078835	0.077031	0.0967	0.11865	0.076462	0.089444	0.13041	0.076367	0.076047	0.075656	0.089982	0.091014	0.09397	0.11981	0.091858	0.12579	0.1431	0.07582	0.098113	0.084946	0.10899	0.085384	0.08348	0.083016	0.091327	0.10208	0.11452	0.10158	0.10731	0.1333	0.075776	0.13741	0.097257	0.098143	0.098814	0.098314
684	0.22727	0.17507	0.15606	0.19244	0.20315	0.17507	0.14746	0.25794	0.29236	0.1243	0.21233	0.32866	0.22379	0.076388	0.075713	0.090404	0.10433	0.078067	0.083037	0.11175	0.075343	0.075354	0.075182	0.083563	0.084017	0.08611	0.12243	0.09406	0.12852	0.14645	0.074911	0.10039	0.086944	0.096172	0.086904	0.082646	0.083725	0.093346	0.10439	0.11704	0.10387	0.10967	0.13627	0.075346	0.14063	0.099513	0.10042	0.1011	0.10057
685	0.18759	0.14547	0.13168	0.15926	0.16767	0.14518	0.1244	0.21746	0.24836	0.10792	0.17548	0.28287	0.18521	0.075288	0.07541	0.086476	0.094585	0.079842	0.079121	0.098801	0.075246	0.075493	0.075476	0.079642	0.079685	0.081176	0.12512	0.096284	0.13133	0.14995	0.074897	0.10269	0.089001	0.08763	0.08861	0.082656	0.084847	0.095423	0.10673	0.11961	0.10619	0.11207	0.13935	0.075671	0.14399	0.10179	0.10272	0.1034	0.10285
686	0.15511	0.12315	0.11388	0.13354	0.13977	0.12266	0.10788	0.18216	0.20871	0.096659	0.14575	0.2401	0.15351	0.075143	0.075829	0.084266	0.088226	0.081739	0.076972	0.090172	0.07581	0.076225	0.076318	0.077493	0.077244	0.078317	0.12787	0.098531	0.13421	0.15361	0.07552	0.10501	0.091105	0.082186	0.090452	0.083273	0.086265	0.097548	0.1091	0.12223	0.10853	0.1145	0.14253	0.076535	0.14748	0.10409	0.10504	0.10574	0.10515
687	0.1302	0.10722	0.10147	0.11474	0.11913	0.10659	0.096542	0.15316	0.17483	0.089225	0.12324	0.20185	0.12908	0.075675	0.076759	0.083293	0.084315	0.083722	0.076078	0.084673	0.076845	0.077378	0.077549	0.0766	0.076145	0.076926	0.1307	0.1008	0.13719	0.15745	0.076597	0.10736	0.093245	0.078952	0.092393	0.084327	0.087897	0.099712	0.1115	0.12492	0.11091	0.11698	0.14584	0.077782	0.15113	0.10642	0.1074	0.1081	0.10748
688	0.11219	0.096319	0.093167	0.10166	0.10463	0.095611	0.089073	0.13073	0.14761	0.084564	0.10711	0.16948	0.11132	0.076688	0.078054	0.083211	0.082157	0.085768	0.076076	0.081406	0.078214	0.078831	0.079058	0.0766	0.075997	0.076573	0.13361	0.10309	0.14025	0.1615	0.077996	0.10975	0.095416	0.077287	0.09441	0.085695	0.089683	0.10191	0.11394	0.12767	0.11333	0.1195	0.14928	0.079301	0.15496	0.10878	0.10979	0.1105	0.10984
689	0.099755	0.08917	0.087876	0.092913	0.094865	0.08841	0.084399	0.11431	0.127	0.081882	0.096054	0.1437	0.098998	0.078041	0.079607	0.083769	0.081249	0.08786	0.076708	0.079723	0.07982	0.080496	0.080763	0.077233	0.076527	0.076958	0.1366	0.10541	0.14342	0.16578	0.079624	0.11217	0.097613	0.076737	0.096484	0.08729	0.091582	0.10414	0.11642	0.13049	0.11578	0.12207	0.15288	0.081015	0.159	0.11117	0.11221	0.11293	0.11223
690	0.091513	0.084723	0.084744	0.087331	0.088561	0.08393	0.081714	0.10285	0.11221	0.080607	0.088776	0.12434	0.09079	0.079636	0.081342	0.084785	0.081231	0.089989	0.07779	0.079161	0.081596	0.082312	0.082609	0.078316	0.077537	0.077865	0.13969	0.10776	0.14671	0.17035	0.081413	0.11463	0.099837	0.076978	0.098606	0.08905	0.093566	0.1064	0.11895	0.13339	0.11828	0.12469	0.15665	0.082867	0.16327	0.1136	0.11467	0.1154	0.11466
691	0.086303	0.082202	0.08315	0.084008	0.084733	0.081386	0.080441	0.095177	0.10206	0.080332	0.084232	0.11054	0.085578	0.081401	0.083208	0.086132	0.081845	0.092146	0.079192	0.079395	0.083491	0.084236	0.084555	0.079718	0.078888	0.079142	0.14289	0.11015	0.15014	0.17525	0.083318	0.11713	0.10209	0.077783	0.10077	0.090931	0.095615	0.1087	0.12153	0.13638	0.12082	0.12737	0.16064	0.084817	0.16781	0.11606	0.11717	0.11792	0.11713
692	0.083252	0.081047	0.082649	0.082289	0.082661	0.080216	0.080171	0.090306	0.095401	0.080767	0.081638	0.10112	0.082508	0.083288	0.085166	0.087715	0.082911	0.094327	0.080822	0.080194	0.085474	0.086237	0.086574	0.081346	0.080481	0.080682	0.14622	0.11256	0.15371	0.18054	0.085305	0.11968	0.10436	0.078987	0.10297	0.092901	0.097714	0.11102	0.12416	0.13947	0.12342	0.13012	0.16486	0.08684	0.17267	0.11857	0.11973	0.12049	0.11964
693	0.08173	0.080862	0.082925	0.081706	0.081831	0.08002	0.080612	0.087458	0.091282	0.081708	0.08043	0.094989	0.080963	0.08526	0.087191	0.089471	0.084298	0.096532	0.082612	0.081394	0.087519	0.088296	0.088646	0.083135	0.082246	0.082407	0.14968	0.11502	0.15745	0.1863	0.087353	0.12228	0.10666	0.080475	0.1052	0.094941	0.099856	0.11339	0.12685	0.14266	0.12607	0.13294	0.16937	0.088916	0.1779	0.12113	0.12233	0.12311	0.12219
694	0.081288	0.081363	0.083751	0.081926	0.081878	0.080514	0.081556	0.086058	0.088986	0.083006	0.080205	0.091244	0.080498	0.087295	0.089265	0.091351	0.085913	0.098758	0.084518	0.082877	0.089612	0.090397	0.090759	0.085039	0.084133	0.084263	0.1533	0.11751	0.16139	0.19265	0.089445	0.12494	0.10899	0.082164	0.10746	0.097034	0.10203	0.11578	0.12961	0.14598	0.12878	0.13584	0.17422	0.091033	0.18357	0.12373	0.12499	0.12578	0.1248
695	0.081609	0.082351	0.084968	0.082715	0.082545	0.081498	0.082859	0.085691	0.087989	0.084559	0.080678	0.089213	0.080801	0.089376	0.091377	0.093325	0.087693	0.10101	0.086506	0.084562	0.091741	0.092532	0.092905	0.087024	0.086108	0.086214	0.15709	0.12005	0.16555	0.19974	0.091571	0.12766	0.11135	0.083996	0.10975	0.099172	0.10425	0.11822	0.13243	0.14944	0.13156	0.13883	0.17946	0.093183	0.18978	0.1264	0.12771	0.12852	0.12746
696	0.082471	0.083684	0.086463	0.083907	0.083651	0.082829	0.084415	0.086058	0.087912	0.086294	0.081644	0.088399	0.081647	0.091492	0.09352	0.095368	0.08959	0.10328	0.088554	0.086391	0.093901	0.094695	0.095078	0.08907	0.088146	0.088232	0.16108	0.12264	0.16998	0.20777	0.093726	0.13044	0.11375	0.085931	0.11208	0.10135	0.10649	0.1207	0.13534	0.15305	0.13441	0.14191	0.1852	0.09536	0.19665	0.12912	0.13049	0.13133	0.13019
697	0.083715	0.085262	0.088157	0.085385	0.085067	0.084405	0.086151	0.086947	0.088488	0.088159	0.082962	0.088453	0.082879	0.093636	0.095687	0.097467	0.091574	0.10557	0.090648	0.088322	0.096086	0.096883	0.097276	0.091161	0.090232	0.090301	0.1653	0.12529	0.17472	0.21705	0.095905	0.1333	0.11618	0.08794	0.11444	0.10356	0.10876	0.12322	0.13834	0.15684	0.13735	0.1451	0.19153	0.097563	0.20434	0.13191	0.13336	0.13421	0.13298
698	0.08523	0.087015	0.089992	0.087066	0.086704	0.086157	0.088017	0.088209	0.089528	0.090118	0.084529	0.089122	0.084385	0.095804	0.097878	0.09961	0.093623	0.1079	0.092777	0.090329	0.098295	0.099094	0.099497	0.093287	0.092354	0.092408	0.1698	0.128	0.17984	0.22802	0.098107	0.13624	0.11865	0.090003	0.11684	0.1058	0.11107	0.12579	0.14144	0.16083	0.14038	0.14842	0.19861	0.099789	0.2131	0.13478	0.1363	0.13718	0.13585
699	0.086938	0.088893	0.09193	0.088891	0.088497	0.088035	0.089976	0.089737	0.090898	0.092146	0.086273	0.090228	0.086086	0.097994	0.10009	0.10179	0.095721	0.11025	0.094935	0.092392	0.10053	0.10133	0.10174	0.095442	0.094507	0.094545	0.17462	0.13077	0.18541	0.24131	0.10033	0.13927	0.12117	0.092108	0.11927	0.10807	0.1134	0.12841	0.14464	0.16505	0.1435	0.15187	0.20665	0.10204	0.22323	0.13773	0.13933	0.14025	0.13879
700	0.088782	0.090862	0.093945	0.090821	0.090402	0.090003	0.092004	0.091455	0.092504	0.094226	0.088144	0.091645	0.087925	0.1002	0.10232	0.10401	0.097859	0.11263	0.097118	0.094498	0.10278	0.10358	0.10401	0.097623	0.096685	0.096708	0.17982	0.13362	0.19157	0.25783	0.10258	0.1424	0.12373	0.094246	0.12175	0.11037	0.11577	0.1311	0.14797	0.16954	0.14675	0.15548	0.21594	0.10431	0.23522	0.14076	0.14247	0.14341	0.14183
701	0.090725	0.092898	0.096016	0.092828	0.092389	0.092038	0.094083	0.093311	0.094278	0.096348	0.090107	0.093285	0.089865	0.10244	0.10458	0.10625	0.10003	0.11505	0.099325	0.096638	0.10506	0.10586	0.1063	0.099826	0.098886	0.098893	0.18548	0.13654	0.19845	0.27885	0.10485	0.14564	0.12634	0.096412	0.12427	0.11271	0.11818	0.13384	0.15144	0.17435	0.15011	0.15927	0.22688	0.10661	0.24969	0.1439	0.14571	0.14668	0.14496
702	0.092741	0.094984	0.098133	0.094891	0.094436	0.094123	0.096203	0.095268	0.096174	0.098504	0.092137	0.095084	0.091879	0.10469	0.10686	0.10853	0.10223	0.11751	0.10155	0.098808	0.10737	0.10817	0.10862	0.10205	0.10111	0.1011	0.19172	0.13955	0.20626	0.30616	0.10714	0.149	0.12902	0.098603	0.12684	0.11507	0.12063	0.13666	0.15506	0.17953	0.15362	0.16326	0.24009	0.10894	0.26758	0.14715	0.14908	0.15009	0.14821
703	0.09481	0.097111	0.10029	0.096999	0.09653	0.096248	0.098356	0.097301	0.098161	0.10069	0.094218	0.097001	0.093948	0.10697	0.10917	0.11084	0.10446	0.12001	0.10381	0.101	0.1097	0.11051	0.11097	0.1043	0.10336	0.10333	0.19867	0.14266	0.21528	0.34221	0.10946	0.15249	0.13175	0.10082	0.12946	0.11748	0.12311	0.13955	0.15886	0.18518	0.1573	0.1675	0.25642	0.1113	0.29023	0.15052	0.15257	0.15363	0.15157
704	0.096922	0.099271	0.10247	0.099143	0.098661	0.098406	0.10054	0.099392	0.10022	0.1029	0.096339	0.099004	0.096059	0.10927	0.1115	0.11318	0.10672	0.12255	0.10608	0.10323	0.11207	0.11287	0.11336	0.10657	0.10563	0.10558	0.20653	0.14587	0.22589	0.39016	0.11181	0.15613	0.13455	0.10305	0.13214	0.11992	0.12565	0.14252	0.16286	0.19138	0.16116	0.17202	0.27715	0.11369	0.31958	0.15402	0.15623	0.15732	0.15506
705	0.099068	0.10146	0.10469	0.10132	0.10082	0.10059	0.10275	0.10153	0.10233	0.10514	0.098493	0.10107	0.098205	0.1116	0.11387	0.11556	0.10901	0.12514	0.10839	0.10547	0.11447	0.11527	0.11577	0.10887	0.10792	0.10786	0.21557	0.1492	0.23862	0.45367	0.11419	0.15994	0.13743	0.10532	0.13488	0.12241	0.12823	0.14558	0.16711	0.19828	0.16523	0.17688	0.30409	0.11612	0.35846	0.15767	0.16004	0.16119	0.15871
706	0.10124	0.10368	0.10693	0.10352	0.10301	0.1028	0.10498	0.10371	0.10448	0.10741	0.10068	0.1032	0.10038	0.11395	0.11626	0.11797	0.11132	0.12779	0.11072	0.10774	0.1169	0.1177	0.11823	0.1112	0.11025	0.11016	0.22614	0.15266	0.25418	0.53544	0.1166	0.16394	0.14039	0.1076	0.13769	0.12494	0.13086	0.14874	0.17163	0.20604	0.16956	0.18216	0.33979	0.11858	0.41071	0.16149	0.16405	0.16526	0.16252
707	0.10345	0.10592	0.1092	0.10575	0.10523	0.10504	0.10724	0.10592	0.10667	0.1097	0.10289	0.10536	0.10258	0.11634	0.1187	0.12042	0.11367	0.1305	0.11308	0.11004	0.11937	0.12018	0.12072	0.11355	0.1126	0.11249	0.23875	0.15626	0.2736	0.63363	0.11906	0.16816	0.14343	0.10991	0.14057	0.12751	0.13355	0.15202	0.17648	0.21489	0.17418	0.18793	0.38766	0.12109	0.48096	0.1655	0.16828	0.16955	0.16652
708	0.10567	0.10819	0.1115	0.108	0.10747	0.10731	0.10952	0.10816	0.10889	0.11202	0.10512	0.10756	0.10481	0.11877	0.12117	0.12291	0.11604	0.13327	0.11547	0.11236	0.12189	0.12269	0.12326	0.11594	0.11498	0.11484	0.25415	0.16002	0.29826	0.73596	0.12155	0.17261	0.14658	0.11226	0.14353	0.13014	0.1363	0.15541	0.18172	0.22513	0.17914	0.19429	0.45176	0.12365	0.57262	0.16973	0.17274	0.17409	0.17073
709	0.10793	0.11048	0.11383	0.11028	0.10973	0.1096	0.11184	0.11044	0.11115	0.11437	0.10738	0.1098	0.10707	0.12123	0.12368	0.12545	0.11846	0.13611	0.1179	0.11472	0.12445	0.12526	0.12585	0.11836	0.1174	0.11723	0.27341	0.16396	0.3301	0.81876	0.12409	0.17735	0.14984	0.11463	0.14657	0.13283	0.13911	0.15895	0.18743	0.23713	0.18452	0.20138	0.53548	0.12625	0.68206	0.1742	0.17749	0.17892	0.17519
710	0.1102	0.1128	0.11619	0.11259	0.11202	0.11191	0.11418	0.11274	0.11344	0.11675	0.10967	0.11207	0.10935	0.12374	0.12624	0.12803	0.12091	0.13902	0.12037	0.11711	0.12707	0.12787	0.12849	0.12083	0.11986	0.11966	0.2981	0.16811	0.37152	0.86126	0.12667	0.1824	0.15322	0.11703	0.14972	0.13557	0.142	0.16264	0.19369	0.25141	0.19039	0.20934	0.63758	0.12891	0.79033	0.17895	0.18256	0.18408	0.17992
711	0.11251	0.11516	0.11858	0.11493	0.11434	0.11426	0.11655	0.11508	0.11575	0.11917	0.11198	0.11437	0.11166	0.12629	0.12885	0.13067	0.1234	0.14202	0.12288	0.11953	0.12974	0.13054	0.13119	0.12333	0.12235	0.12212	0.33053	0.17248	0.42527	0.86218	0.12931	0.18782	0.15674	0.11948	0.15297	0.13839	0.14497	0.16651	0.20062	0.26865	0.19684	0.21837	0.74527	0.13163	0.86653	0.18402	0.188	0.18964	0.18498
712	0.11485	0.11755	0.12101	0.1173	0.11669	0.11664	0.11896	0.11745	0.1181	0.12162	0.11432	0.1167	0.11399	0.12888	0.13151	0.13337	0.12593	0.14512	0.12543	0.12199	0.13247	0.13326	0.13396	0.12587	0.1249	0.12462	0.37396	0.17712	0.49352	0.83477	0.13201	0.19368	0.16041	0.12196	0.15633	0.14127	0.14803	0.17057	0.20838	0.28979	0.20401	0.22874	0.83243	0.13441	0.89273	0.18947	0.19388	0.19565	0.19041
713	0.11721	0.11997	0.12348	0.1197	0.11907	0.11906	0.12141	0.11986	0.12049	0.12412	0.1167	0.11907	0.11636	0.13153	0.13424	0.13612	0.12851	0.14831	0.12803	0.12449	0.13526	0.13606	0.13679	0.12847	0.12749	0.12717	0.43278	0.18205	0.57593	0.79176	0.13477	0.20005	0.16425	0.12448	0.15982	0.14424	0.15118	0.17486	0.21716	0.31612	0.21205	0.24076	0.87579	0.13726	0.87781	0.19536	0.20027	0.20219	0.19628
714	0.11961	0.12243	0.12599	0.12214	0.12149	0.12151	0.12389	0.1223	0.1229	0.12666	0.11911	0.12147	0.11876	0.13424	0.13702	0.13894	0.13115	0.15161	0.13069	0.12703	0.13813	0.13892	0.13969	0.13111	0.13013	0.12977	0.51181	0.18732	0.66641	0.74069	0.13759	0.20702	0.16829	0.12705	0.16346	0.14729	0.15444	0.17941	0.22723	0.34943	0.22119	0.25489	0.87443	0.14019	0.83996	0.20177	0.20727	0.20938	0.20267
715	0.12204	0.12493	0.12854	0.12461	0.12394	0.124	0.12642	0.12479	0.12536	0.12925	0.12155	0.1239	0.1212	0.13701	0.13988	0.14184	0.13383	0.15504	0.13341	0.12963	0.14107	0.14186	0.14268	0.13382	0.13283	0.13241	0.61322	0.193	0.75086	0.68572	0.14049	0.21473	0.17255	0.12968	0.16726	0.15043	0.15781	0.18426	0.23895	0.39204	0.23172	0.27169	0.84371	0.14321	0.79092	0.20881	0.21501	0.21735	0.2097
716	0.12451	0.12747	0.13114	0.12713	0.12643	0.12653	0.12899	0.12731	0.12786	0.13189	0.12404	0.12638	0.12368	0.13985	0.14281	0.14481	0.13658	0.1586	0.13619	0.13227	0.1441	0.14489	0.14576	0.13658	0.13559	0.13512	0.72868	0.19914	0.81127	0.62911	0.14347	0.22333	0.17706	0.13235	0.17124	0.15368	0.1613	0.18946	0.25278	0.44671	0.24401	0.29192	0.79743	0.14631	0.73657	0.2166	0.22365	0.22627	0.21749
717	0.12703	0.13006	0.13379	0.1297	0.12896	0.12911	0.13161	0.12988	0.1304	0.13458	0.12656	0.1289	0.1262	0.14276	0.14582	0.14787	0.1394	0.16231	0.13903	0.13497	0.14722	0.148	0.14893	0.13942	0.13841	0.13788	0.83173	0.20583	0.83693	0.57206	0.14654	0.23303	0.18187	0.13509	0.17542	0.15704	0.16494	0.19507	0.2694	0.51586	0.25861	0.3165	0.74327	0.14952	0.68003	0.22533	0.2334	0.23637	0.22624
718	0.12958	0.1327	0.1365	0.13231	0.13154	0.13174	0.13429	0.13251	0.13298	0.13734	0.12914	0.13146	0.12876	0.14575	0.14893	0.15102	0.14228	0.16619	0.14196	0.13773	0.15044	0.15122	0.15221	0.14232	0.14131	0.14071	0.89037	0.21317	0.83047	0.5152	0.1497	0.24412	0.18703	0.13789	0.17984	0.16052	0.16874	0.20117	0.28968	0.59948	0.27621	0.34658	0.68534	0.15284	0.62286	0.23521	0.24454	0.24796	0.23618
719	0.13219	0.1354	0.13928	0.13497	0.13417	0.13443	0.13703	0.13518	0.13562	0.14016	0.13176	0.13407	0.13137	0.14882	0.15213	0.15428	0.14525	0.17025	0.14496	0.14056	0.15378	0.15455	0.15561	0.14531	0.14429	0.14362	0.89627	0.2213	0.8018	0.45893	0.15296	0.25696	0.19259	0.14076	0.18453	0.16414	0.17271	0.20785	0.31487	0.6909	0.29778	0.38342	0.6258	0.15627	0.56583	0.24657	0.25746	0.26146	0.24765
720	0.13485	0.13816	0.14211	0.1377	0.13685	0.13718	0.13983	0.13791	0.1383	0.14305	0.13444	0.13673	0.13404	0.152	0.15544	0.15765	0.14829	0.17453	0.14806	0.14346	0.15723	0.158	0.15914	0.14838	0.14736	0.1466	0.86654	0.23039	0.7598	0.40359	0.15635	0.27209	0.19864	0.14371	0.18952	0.16792	0.17688	0.21525	0.3466	0.77372	0.32462	0.42829	0.56578	0.15985	0.50931	0.25983	0.27268	0.27746	0.26112
721	0.13756	0.14098	0.14502	0.14048	0.13959	0.13999	0.14269	0.14071	0.14105	0.14602	0.13717	0.13945	0.13676	0.15527	0.15887	0.16114	0.15143	0.17904	0.15125	0.14644	0.16083	0.16158	0.16281	0.15155	0.15052	0.14967	0.81921	0.24066	0.71014	0.34963	0.15986	0.29024	0.20527	0.14674	0.19488	0.17187	0.18128	0.22352	0.38701	0.82782	0.35846	0.48198	0.50592	0.16357	0.45353	0.27558	0.29094	0.29677	0.27727
722	0.14033	0.14388	0.14801	0.14333	0.14239	0.14287	0.14563	0.14357	0.14385	0.14907	0.13997	0.14222	0.13955	0.15866	0.16243	0.16477	0.15467	0.18381	0.15455	0.1495	0.16457	0.16532	0.16664	0.15482	0.15379	0.15283	0.76361	0.25242	0.65627	0.29783	0.16351	0.31244	0.2126	0.14986	0.20066	0.17601	0.18593	0.23287	0.43862	0.84368	0.40149	0.54404	0.44669	0.16745	0.3987	0.29469	0.31328	0.32056	0.29707
723	0.14317	0.14685	0.15108	0.14625	0.14526	0.14582	0.14866	0.1465	0.14673	0.15221	0.14284	0.14506	0.1424	0.16218	0.16613	0.16855	0.15802	0.1889	0.15796	0.15266	0.16848	0.16921	0.17065	0.1582	0.15716	0.15609	0.70415	0.26604	0.60019	0.24934	0.16731	0.34019	0.2208	0.15308	0.20695	0.18036	0.19088	0.24357	0.50379	0.82748	0.45613	0.61157	0.38855	0.17152	0.34521	0.3184	0.34123	0.35054	0.32196
724	0.14608	0.1499	0.15424	0.14925	0.1482	0.14886	0.15177	0.14952	0.14967	0.15546	0.14578	0.14797	0.14532	0.16583	0.17	0.1725	0.16149	0.19433	0.1615	0.15592	0.17257	0.17329	0.17485	0.16171	0.16067	0.15946	0.64318	0.28207	0.54309	0.20572	0.17129	0.37566	0.23009	0.15641	0.21385	0.18497	0.19618	0.25598	0.58304	0.79148	0.52431	0.6781	0.33219	0.17579	0.29378	0.34854	0.37693	0.38909	0.3541
725	0.14907	0.15304	0.1575	0.15233	0.15122	0.15198	0.15497	0.15261	0.15269	0.15881	0.1488	0.15095	0.14833	0.16964	0.17404	0.17663	0.16509	0.20017	0.16519	0.15928	0.17688	0.17758	0.17928	0.16536	0.16431	0.16295	0.58186	0.30124	0.48569	0.16855	0.17546	0.42187	0.24075	0.15986	0.22148	0.18985	0.20189	0.27056	0.67152	0.74456	0.60524	0.73401	0.27868	0.1803	0.2456	0.38779	0.42345	0.4395	0.39661
726	0.15214	0.15628	0.16086	0.1555	0.15433	0.15521	0.15829	0.1558	0.15579	0.16228	0.15191	0.15402	0.15142	0.17362	0.17828	0.18098	0.16884	0.20649	0.16903	0.16277	0.18141	0.1821	0.18395	0.16915	0.1681	0.16658	0.52082	0.3246	0.4286	0.13883	0.17985	0.48277	0.25317	0.16344	0.23003	0.19507	0.20808	0.28793	0.75544	0.69183	0.69171	0.77017	0.22958	0.18506	0.20226	0.43992	0.48472	0.50566	0.45372
727	0.15529	0.15963	0.16435	0.15878	0.15752	0.15854	0.16171	0.15909	0.15898	0.16588	0.15511	0.15717	0.1546	0.17779	0.18275	0.18556	0.17275	0.21335	0.17305	0.16639	0.18621	0.18688	0.18891	0.17312	0.17206	0.17036	0.46046	0.35357	0.37243	0.1165	0.18449	0.56225	0.26787	0.16716	0.23969	0.20066	0.21484	0.30883	0.81528	0.63635	0.76801	0.78259	0.1867	0.19012	0.16541	0.50951	0.56458	0.59037	0.53
728	0.15855	0.1631	0.16797	0.16216	0.16082	0.16198	0.16526	0.16249	0.16227	0.16963	0.15842	0.16041	0.15788	0.18218	0.18747	0.19042	0.17684	0.22088	0.17727	0.17017	0.19131	0.19196	0.19419	0.17727	0.17621	0.17431	0.4012	0.39015	0.31804	0.10053	0.1894	0.66051	0.28552	0.17104	0.25075	0.2067	0.2223	0.33412	0.83877	0.57985	0.81603	0.77348	0.15158	0.19552	0.13605	0.60001	0.66302	0.69061	0.62704
729	0.16191	0.1667	0.17173	0.16566	0.16423	0.16556	0.16895	0.16601	0.16567	0.17354	0.16183	0.16375	0.16127	0.1868	0.19248	0.19559	0.18114	0.22919	0.1817	0.1741	0.19676	0.19737	0.19984	0.18164	0.18057	0.17843	0.34365	0.43701	0.26668	0.08955	0.19463	0.76622	0.30703	0.1751	0.26355	0.21326	0.23059	0.36467	0.82937	0.52326	0.8284	0.74803	0.12472	0.2013	0.11409	0.70747	0.76842	0.79036	0.73572
730	0.16539	0.17043	0.17566	0.1693	0.16776	0.16927	0.1728	0.16966	0.16917	0.17763	0.16538	0.16721	0.16478	0.1917	0.19782	0.20111	0.18566	0.23845	0.18637	0.17822	0.20259	0.20318	0.20592	0.18623	0.18516	0.18276	0.28881	0.49732	0.21995	0.082266	0.20022	0.85238	0.33353	0.17936	0.27849	0.22045	0.23992	0.40124	0.79813	0.46716	0.81161	0.71134	0.10536	0.20753	0.098452	0.81147	0.85366	0.86225	0.83014
731	0.169	0.17433	0.17976	0.17308	0.17142	0.17314	0.17681	0.17345	0.17281	0.18192	0.16905	0.17078	0.16843	0.19691	0.20354	0.20705	0.19045	0.24887	0.19133	0.18255	0.20888	0.20944	0.21249	0.1911	0.19002	0.18733	0.23813	0.57372	0.17959	0.077658	0.20622	0.89292	0.36641	0.18384	0.29608	0.22838	0.25051	0.44419	0.75401	0.41197	0.77625	0.66739	0.092008	0.21429	0.087742	0.87967	0.8931	0.88804	0.88101
732	0.17275	0.1784	0.18405	0.17701	0.17522	0.17718	0.18101	0.17739	0.17658	0.18644	0.17288	0.17449	0.17222	0.20248	0.2097	0.21347	0.19553	0.26072	0.1966	0.1871	0.2157	0.21623	0.21965	0.19627	0.19518	0.19215	0.19347	0.66506	0.14692	0.074972	0.21272	0.88762	0.40731	0.18856	0.31694	0.23723	0.26267	0.49322	0.70267	0.35817	0.72992	0.61895	0.08312	0.22165	0.080671	0.89583	0.88711	0.87441	0.88297
733	0.17665	0.18266	0.18857	0.18113	0.17919	0.18141	0.18542	0.18151	0.1805	0.19121	0.17687	0.17834	0.17617	0.20846	0.21636	0.22046	0.20094	0.27437	0.20224	0.19192	0.22314	0.22364	0.22748	0.20178	0.20069	0.19727	0.15651	0.76044	0.12213	0.073667	0.21979	0.85455	0.45789	0.19357	0.34184	0.24719	0.27677	0.5469	0.64761	0.30644	0.6775	0.56783	0.077441	0.22973	0.076229	0.87341	0.85372	0.83785	0.85333
734	0.18072	0.18714	0.19334	0.18544	0.18333	0.18585	0.19007	0.18582	0.18458	0.19626	0.18104	0.18234	0.1803	0.21493	0.22364	0.22812	0.20675	0.29029	0.20829	0.19704	0.23132	0.23179	0.23614	0.20769	0.20659	0.20273	0.12799	0.83726	0.10433	0.073353	0.22753	0.80696	0.51918	0.1989	0.37168	0.25852	0.29332	0.60219	0.59076	0.25783	0.62194	0.51522	0.074039	0.23867	0.073673	0.83079	0.806	0.78889	0.80717
735	0.18499	0.19186	0.19838	0.18996	0.18767	0.19054	0.19499	0.19034	0.18885	0.20164	0.18542	0.18652	0.18462	0.22196	0.23163	0.2366	0.21301	0.30915	0.21482	0.20249	0.24037	0.24082	0.24577	0.21407	0.21295	0.20857	0.10732	0.87464	0.092093	0.073751	0.23608	0.75188	0.59008	0.20459	0.40742	0.27157	0.31299	0.65415	0.53322	0.21376	0.56488	0.46196	0.072253	0.24865	0.072468	0.77763	0.75089	0.7337	0.75229
736	0.18946	0.19686	0.20375	0.19474	0.19223	0.19549	0.20021	0.19509	0.19331	0.20741	0.19002	0.19089	0.18917	0.22966	0.24048	0.24607	0.21981	0.33181	0.22192	0.20834	0.25049	0.25092	0.2566	0.22098	0.21985	0.21487	0.093015	0.87114	0.08397	0.074662	0.2456	0.69368	0.66511	0.2107	0.44987	0.28679	0.3366	0.69667	0.47571	0.17578	0.50732	0.40875	0.071616	0.25989	0.072234	0.71942	0.69272	0.67594	0.69343
737	0.19418	0.20216	0.20948	0.19979	0.19704	0.20074	0.20578	0.20011	0.198	0.2136	0.19488	0.19546	0.19396	0.23816	0.25037	0.25676	0.22724	0.35946	0.22968	0.21466	0.26191	0.26234	0.26889	0.22852	0.22737	0.22169	0.083461	0.84087	0.078817	0.075941	0.2563	0.63444	0.73309	0.2173	0.49923	0.30478	0.36516	0.72436	0.41877	0.14499	0.44997	0.35632	0.071798	0.27268	0.072697	0.65938	0.63354	0.61729	0.63309
738	0.19916	0.20783	0.21564	0.20516	0.20213	0.20635	0.21175	0.20542	0.20293	0.22031	0.20002	0.20028	0.19903	0.24764	0.26155	0.26894	0.23542	0.3937	0.23823	0.22151	0.27491	0.27537	0.283	0.23681	0.23564	0.22914	0.077318	0.79639	0.075782	0.077484	0.26847	0.5751	0.78035	0.22446	0.55428	0.32629	0.39975	0.73458	0.36301	0.12155	0.39343	0.30558	0.072566	0.28738	0.073661	0.59886	0.57426	0.5586	0.57234
739	0.20444	0.2139	0.2223	0.2109	0.20753	0.21235	0.21818	0.21106	0.20814	0.22763	0.20548	0.20535	0.2044	0.25833	0.27433	0.28302	0.24453	0.43655	0.24772	0.229	0.28991	0.29044	0.29938	0.24601	0.24479	0.23733	0.073595	0.74395	0.074254	0.079217	0.28246	0.5162	0.79888	0.23228	0.61143	0.35227	0.44133	0.7281	0.30927	0.10463	0.33845	0.25777	0.073751	0.3045	0.074984	0.53853	0.51544	0.50038	0.51185
740	0.21007	0.22045	0.22953	0.21705	0.21331	0.21882	0.22515	0.21708	0.21366	0.23566	0.21131	0.21071	0.21014	0.27049	0.28911	0.29945	0.25475	0.4903	0.25836	0.23727	0.3074	0.30808	0.31865	0.25629	0.25501	0.24641	0.071584	0.68771	0.073799	0.081085	0.29876	0.4581	0.79053	0.2409	0.66446	0.38378	0.49025	0.70783	0.25877	0.092887	0.28604	0.21441	0.075233	0.32467	0.076564	0.47886	0.45742	0.44295	0.45208
741	0.2161	0.22755	0.23746	0.22368	0.2195	0.22582	0.23277	0.22353	0.21952	0.24455	0.21756	0.21641	0.21627	0.28454	0.30646	0.31886	0.26636	0.5567	0.27041	0.24647	0.32807	0.32901	0.3416	0.26792	0.26655	0.25657	0.07079	0.6301	0.07411	0.083051	0.318	0.40109	0.76286	0.25046	0.70579	0.42192	0.54545	0.6772	0.2131	0.085029	0.23762	0.17705	0.076926	0.34874	0.078328	0.4202	0.40048	0.38663	0.39347
742	0.22258	0.23531	0.24622	0.23089	0.22619	0.23346	0.24115	0.23047	0.22579	0.2545	0.2243	0.22247	0.22287	0.30099	0.32711	0.34199	0.27968	0.63492	0.28419	0.25681	0.35281	0.35419	0.3693	0.2812	0.2797	0.26806	0.070863	0.57217	0.074966	0.08509	0.34103	0.34561	0.72291	0.26116	0.72954	0.46745	0.60349	0.63928	0.17399	0.079996	0.19487	0.14679	0.07877	0.37778	0.080224	0.36299	0.34508	0.33195	0.33665
743	0.2296	0.24384	0.25597	0.23876	0.23344	0.24185	0.25045	0.23797	0.23251	0.26573	0.23159	0.22895	0.23001	0.32054	0.35206	0.36969	0.29515	0.71788	0.30014	0.26858	0.38277	0.38485	0.40307	0.29655	0.29487	0.28122	0.071554	0.5145	0.076212	0.087183	0.369	0.29248	0.67545	0.27324	0.73406	0.52016	0.65818	0.59644	0.14261	0.076995	0.15933	0.12374	0.08072	0.41316	0.082215	0.30798	0.29202	0.27983	0.28263
744	0.23725	0.25331	0.26694	0.24744	0.24138	0.25113	0.26087	0.24612	0.23974	0.27855	0.23954	0.23591	0.23778	0.34417	0.38263	0.40286	0.31332	0.79023	0.31884	0.28212	0.41939	0.42255	0.44452	0.31454	0.31259	0.29649	0.072686	0.45749	0.077734	0.089319	0.40336	0.24294	0.62365	0.28703	0.72166	0.57787	0.70174	0.5504	0.11902	0.075451	0.13168	0.1071	0.082747	0.45645	0.084277	0.25636	0.24256	0.23164	0.23289
745	0.24564	0.26391	0.2794	0.25709	0.25014	0.2615	0.27266	0.25503	0.24758	0.29336	0.24827	0.24342	0.24628	0.37318	0.4205	0.4422	0.33485	0.83442	0.34103	0.29791	0.46433	0.46907	0.4953	0.33591	0.33355	0.31443	0.074133	0.40147	0.079454	0.091488	0.44593	0.1987	0.56952	0.30295	0.69635	0.63563	0.7278	0.5024	0.10222	0.074956	0.11144	0.095574	0.08483	0.50912	0.086391	0.20981	0.1984	0.18914	0.18927
746	0.25492	0.27589	0.29372	0.2679	0.25987	0.2732	0.28616	0.26483	0.25611	0.31067	0.2579	0.25156	0.25564	0.40931	0.4676	0.48784	0.36055	0.84351	0.36771	0.31656	0.51905	0.52588	0.55636	0.36161	0.35868	0.33586	0.075803	0.34689	0.081315	0.093688	0.49856	0.16146	0.51426	0.32154	0.6619	0.68588	0.73421	0.45335	0.090732	0.075215	0.097293	0.087902	0.086954	0.57169	0.088547	0.17012	0.16123	0.15391	0.15339
747	0.26528	0.28959	0.31032	0.28016	0.27081	0.28654	0.3018	0.27567	0.26545	0.33111	0.26862	0.26044	0.26604	0.45465	0.5256	0.53874	0.39132	0.82438	0.40014	0.33886	0.58384	0.593	0.62638	0.3929	0.38917	0.36182	0.077631	0.2945	0.083277	0.095914	0.56235	0.1322	0.45872	0.34351	0.62129	0.72088	0.72305	0.40404	0.083157	0.076017	0.087771	0.083038	0.089112	0.64198	0.090737	0.13851	0.13204	0.12665	0.12586
748	0.27696	0.30541	0.32977	0.2942	0.28323	0.30191	0.32013	0.28775	0.27575	0.35551	0.28066	0.27018	0.27768	0.51129	0.59447	0.59199	0.42799	0.78778	0.43982	0.36581	0.65577	0.66661	0.69934	0.43131	0.4265	0.39369	0.079572	0.24552	0.085311	0.098167	0.63565	0.11063	0.40358	0.36976	0.57668	0.73622	0.69832	0.35526	0.078397	0.077212	0.081615	0.080192	0.091298	0.71292	0.092956	0.11497	0.11053	0.1068	0.10599
749	0.29026	0.3239	0.35273	0.31047	0.2975	0.31984	0.34188	0.30131	0.28717	0.38481	0.2943	0.28092	0.29082	0.57997	0.6699	0.64256	0.47116	0.74104	0.48834	0.39863	0.72651	0.73693	0.76349	0.47843	0.4723	0.43318	0.081593	0.20155	0.0874	0.10045	0.71128	0.095518	0.3496	0.40145	0.52955	0.73234	0.66396	0.30789	0.075642	0.078689	0.077864	0.078789	0.093507	0.77238	0.095203	0.098365	0.095451	0.093005	0.092275
750	0.3056	0.34573	0.37999	0.32952	0.31411	0.34101	0.36796	0.31663	0.29994	0.4201	0.30989	0.29286	0.30579	0.65738	0.74099	0.6842	0.52062	0.68866	0.54666	0.43863	0.78288	0.78987	0.80536	0.53534	0.52787	0.48212	0.083672	0.16429	0.089531	0.10276	0.77557	0.08531	0.29774	0.43992	0.48096	0.71294	0.62309	0.26305	0.074313	0.08037	0.075823	0.078417	0.095739	0.80814	0.097476	0.087088	0.085271	0.083758	0.083141
751	0.32348	0.37175	0.41234	0.35209	0.33369	0.36627	0.39948	0.33407	0.31433	0.46234	0.32789	0.3062	0.32302	0.73304	0.79268	0.71147	0.57469	0.63349	0.61377	0.48692	0.81323	0.8147	0.81814	0.60126	0.59301	0.54172	0.085794	0.13475	0.091695	0.10509	0.81415	0.078671	0.24932	0.48653	0.43172	0.68236	0.57798	0.22205	0.073999	0.082199	0.075001	0.078782	0.097995	0.81562	0.099778	0.079701	0.078651	0.077804	0.077294
752	0.3446	0.40294	0.45048	0.37903	0.35707	0.39669	0.43764	0.35404	0.33065	0.51196	0.34887	0.32122	0.34302	0.7906	0.81453	0.72189	0.62951	0.57713	0.68442	0.54366	0.81495	0.81102	0.8052	0.6714	0.66386	0.61088	0.087949	0.11281	0.093887	0.10746	0.82151	0.074582	0.20594	0.54213	0.38254	0.64419	0.53025	0.18624	0.074409	0.084135	0.075045	0.079671	0.10027	0.79935	0.10211	0.075091	0.074576	0.074199	0.07378
753	0.3698	0.44035	0.49463	0.41135	0.38528	0.43346	0.48349	0.37705	0.34931	0.56803	0.37354	0.33825	0.36646	0.81725	0.80749	0.71639	0.679	0.52045	0.74791	0.6067	0.79408	0.78617	0.77455	0.73565	0.73106	0.6836	0.090132	0.097318	0.096106	0.10987	0.80318	0.072305	0.16919	0.60577	0.33424	0.60109	0.48101	0.15665	0.075337	0.086151	0.075708	0.080936	0.10258	0.76702	0.10447	0.072448	0.072309	0.072265	0.071918
754	0.40015	0.48481	0.54403	0.45007	0.41955	0.47771	0.53723	0.40365	0.37077	0.62714	0.40277	0.35767	0.39414	0.81253	0.7799	0.69795	0.71628	0.46399	0.79129	0.67016	0.75853	0.74792	0.73291	0.78126	0.78142	0.7478	0.092339	0.086798	0.098349	0.11231	0.76825	0.071316	0.14	0.67296	0.2878	0.55495	0.43114	0.13358	0.076632	0.088227	0.076812	0.082469	0.10491	0.72468	0.10687	0.071202	0.071326	0.07152	0.071228
755	0.43684	0.53638	0.59624	0.49585	0.46111	0.52991	0.5971	0.43439	0.39559	0.68274	0.43751	0.37994	0.42698	0.78517	0.73948	0.66991	0.73643	0.40822	0.80703	0.72445	0.71395	0.70151	0.6847	0.80011	0.80511	0.78972	0.094568	0.07992	0.10062	0.1148	0.72327	0.071246	0.11822	0.73441	0.24449	0.50704	0.38141	0.11652	0.078189	0.09035	0.078229	0.084193	0.10727	0.6764	0.1093	0.07095	0.071261	0.071624	0.071373
756	0.48093	0.59339	0.64674	0.54841	0.51076	0.58889	0.65807	0.46971	0.42434	0.72636	0.47866	0.40557	0.46588	0.7442	0.69134	0.63511	0.73831	0.35367	0.79691	0.75962	0.66407	0.6504	0.63284	0.79291	0.80134	0.80214	0.096819	0.075652	0.10291	0.11733	0.67244	0.071833	0.10277	0.77843	0.20569	0.45826	0.33268	0.10443	0.079933	0.092511	0.079869	0.086055	0.10967	0.62484	0.11177	0.071408	0.071851	0.072334	0.072113
757	0.53285	0.65135	0.68944	0.60544	0.5679	0.65037	0.71162	0.50969	0.45754	0.75103	0.52668	0.43504	0.51147	0.69511	0.63879	0.59572	0.72426	0.30113	0.76835	0.77066	0.61136	0.59681	0.57915	0.76652	0.77681	0.78835	0.099092	0.073243	0.10523	0.11991	0.61847	0.072889	0.092248	0.79704	0.17268	0.40934	0.28597	0.096206	0.08181	0.094705	0.081669	0.088018	0.1121	0.57164	0.11429	0.072371	0.072909	0.073477	0.073278
758	0.59121	0.70279	0.71846	0.66168	0.62902	0.70639	0.74847	0.55368	0.49543	0.75467	0.58083	0.46873	0.56344	0.64133	0.58394	0.55331	0.69799	0.25179	0.72816	0.75959	0.55726	0.54206	0.52467	0.72778	0.73899	0.75668	0.10139	0.072159	0.10759	0.12255	0.56299	0.074278	0.085348	0.79057	0.14618	0.36096	0.24256	0.090861	0.083783	0.096929	0.083582	0.090055	0.11457	0.51773	0.11686	0.073695	0.0743	0.074929	0.074745
759	0.65148	0.73926	0.73047	0.7092	0.68675	0.74723	0.76305	0.59976	0.53763	0.74006	0.63809	0.50671	0.61958	0.58514	0.52802	0.50896	0.663	0.20728	0.68083	0.7322	0.50262	0.48691	0.47003	0.68136	0.69296	0.71402	0.10371	0.07202	0.10997	0.12525	0.50695	0.075905	0.081061	0.76526	0.12605	0.31395	0.20386	0.087621	0.085825	0.099181	0.085579	0.092149	0.11709	0.46374	0.11949	0.075275	0.075928	0.076599	0.076425
760	0.70547	0.75533	0.7257	0.74017	0.73126	0.76618	0.75614	0.64436	0.5826	0.71189	0.69231	0.54832	0.67481	0.52787	0.47182	0.46348	0.62202	0.16927	0.62934	0.6939	0.44802	0.43196	0.41576	0.63036	0.64204	0.66462	0.10607	0.072555	0.11239	0.12802	0.45097	0.0777	0.078639	0.72762	0.11149	0.26932	0.1711	0.085903	0.087919	0.10146	0.087636	0.094288	0.11966	0.41013	0.12217	0.077037	0.077724	0.078426	0.078255
761	0.7436	0.75085	0.7069	0.75036	0.75456	0.76271	0.73256	0.68256	0.62719	0.67442	0.73513	0.59178	0.72139	0.47033	0.41595	0.41748	0.57707	0.13892	0.57562	0.64859	0.39396	0.37775	0.36239	0.57684	0.58844	0.6113	0.10845	0.073573	0.11485	0.13086	0.39561	0.079615	0.077544	0.68229	0.10135	0.22833	0.14494	0.08528	0.090054	0.10377	0.089741	0.096464	0.12228	0.35744	0.12492	0.078926	0.07964	0.080363	0.080193
762	0.75952	0.72978	0.67747	0.74096	0.75482	0.74136	0.6975	0.7093	0.66665	0.63076	0.75929	0.63384	0.75145	0.41317	0.36108	0.37158	0.52958	0.11621	0.52085	0.59892	0.34106	0.32499	0.31067	0.52206	0.53353	0.55593	0.11087	0.074934	0.11736	0.13379	0.34154	0.081615	0.077393	0.63229	0.094578	0.19231	0.12518	0.085446	0.092221	0.10612	0.091882	0.098674	0.12496	0.3064	0.12774	0.080907	0.081641	0.082379	0.082207
763	0.75345	0.69689	0.64041	0.71634	0.73605	0.70757	0.65479	0.7213	0.69565	0.58314	0.76234	0.66991	0.7609	0.35714	0.30806	0.32648	0.48058	0.10009	0.46576	0.54672	0.29018	0.27472	0.26168	0.46682	0.47811	0.49963	0.11333	0.076539	0.11991	0.13681	0.28968	0.083677	0.077917	0.5797	0.090284	0.1623	0.11094	0.086178	0.094417	0.1085	0.094055	0.10091	0.12771	0.25812	0.13065	0.082954	0.083704	0.084452	0.084276
764	0.73008	0.65589	0.59804	0.68084	0.70363	0.66539	0.60719	0.71824	0.71038	0.53313	0.74704	0.69531	0.75109	0.30322	0.25814	0.28307	0.43085	0.089109	0.41096	0.49317	0.24264	0.22836	0.21695	0.4118	0.42283	0.4432	0.11584	0.078317	0.12251	0.13993	0.24141	0.085785	0.078919	0.5258	0.087796	0.13866	0.10107	0.087317	0.096639	0.11091	0.096255	0.10319	0.13052	0.21409	0.13364	0.085047	0.085811	0.086569	0.086385
765	0.69448	0.60967	0.55214	0.63803	0.66203	0.61795	0.55663	0.70197	0.70978	0.48175	0.71793	0.7069	0.72613	0.25276	0.21296	0.24247	0.38111	0.08191	0.35708	0.43914	0.20005	0.18762	0.17814	0.35766	0.36834	0.38732	0.11838	0.080218	0.12517	0.14316	0.1984	0.087927	0.080263	0.47139	0.086611	0.12097	0.094516	0.08875	0.098886	0.11337	0.098482	0.10549	0.13342	0.17598	0.13674	0.087177	0.087954	0.088719	0.088525
766	0.65089	0.56021	0.50398	0.59055	0.61464	0.56732	0.50438	0.67529	0.69529	0.42983	0.67938	0.70402	0.69047	0.2075	0.17423	0.20592	0.33218	0.077422	0.30498	0.38541	0.16404	0.15394	0.14653	0.30533	0.31545	0.33286	0.12099	0.082208	0.12789	0.14652	0.16226	0.090097	0.08185	0.4171	0.086365	0.1083	0.090391	0.090395	0.10116	0.11587	0.10073	0.10782	0.13641	0.145	0.13994	0.089334	0.090125	0.090896	0.09069
767	0.60226	0.50881	0.45448	0.54015	0.56368	0.51485	0.45133	0.64098	0.66964	0.3781	0.63473	0.68819	0.64777	0.16919	0.14312	0.17456	0.28509	0.074862	0.25591	0.33285	0.13552	0.12787	0.12241	0.25609	0.26535	0.28094	0.12364	0.084261	0.13068	0.15002	0.13387	0.092291	0.083612	0.36359	0.086794	0.099558	0.088026	0.092195	0.10346	0.11842	0.10301	0.11019	0.1395	0.1214	0.14327	0.091516	0.09232	0.093097	0.092877
768	0.55059	0.45642	0.40445	0.48808	0.51064	0.46147	0.39826	0.60135	0.63572	0.32743	0.5863	0.66197	0.60062	0.13886	0.11973	0.14903	0.24115	0.073672	0.21147	0.2826	0.11432	0.10887	0.10502	0.21156	0.21962	0.23311	0.12637	0.086361	0.13355	0.15369	0.11291	0.094508	0.085498	0.31167	0.087711	0.09377	0.086928	0.09411	0.10579	0.12102	0.10532	0.11259	0.1427	0.1044	0.14674	0.093718	0.094537	0.095321	0.095084
769	0.49718	0.40383	0.35473	0.43524	0.4566	0.40797	0.34599	0.5581	0.59596	0.27892	0.5356	0.62803	0.55076	0.11639	0.10308	0.12933	0.20185	0.073458	0.17335	0.23613	0.099357	0.095661	0.093024	0.17344	0.18	0.19112	0.12916	0.088497	0.13651	0.15754	0.098211	0.096746	0.087474	0.26253	0.088978	0.090148	0.086741	0.096112	0.10815	0.12368	0.10766	0.11504	0.14603	0.092684	0.15036	0.095941	0.096776	0.097566	0.09731
770	0.44303	0.35187	0.3063	0.3825	0.40245	0.35513	0.29558	0.51247	0.55223	0.23403	0.48368	0.58859	0.49935	0.10058	0.091723	0.11481	0.16855	0.073939	0.14272	0.19512	0.089212	0.086823	0.085068	0.14288	0.14781	0.15649	0.13202	0.090662	0.13955	0.1616	0.0883	0.099006	0.089518	0.2177	0.090499	0.088102	0.087209	0.098181	0.11054	0.12641	0.11003	0.11752	0.1495	0.084915	0.15416	0.098184	0.099037	0.099835	0.099557
771	0.38897	0.30154	0.26043	0.33078	0.3491	0.30396	0.2484	0.46538	0.50586	0.19436	0.43129	0.54537	0.44723	0.089914	0.084268	0.10452	0.14198	0.074916	0.11967	0.16101	0.082604	0.081159	0.080028	0.11992	0.12334	0.12978	0.13498	0.092851	0.14271	0.1659	0.08188	0.10129	0.091613	0.17888	0.092203	0.0872	0.088147	0.1003	0.11297	0.12921	0.11243	0.12005	0.15313	0.080003	0.15817	0.10045	0.10132	0.10213	0.10183
772	0.33596	0.25419	0.21861	0.28129	0.2977	0.25579	0.20611	0.41754	0.4579	0.16129	0.37916	0.49964	0.3951	0.08298	0.079607	0.097507	0.12199	0.076245	0.10324	0.13444	0.078532	0.07776	0.07707	0.10358	0.10577	0.11041	0.13802	0.095064	0.14597	0.17049	0.07795	0.1036	0.093748	0.14734	0.094043	0.087129	0.089423	0.10247	0.11544	0.13208	0.11488	0.12264	0.15696	0.077132	0.1624	0.10274	0.10363	0.10445	0.10412
773	0.2852	0.21144	0.18236	0.23552	0.2497	0.21226	0.17026	0.36965	0.40918	0.13541	0.32808	0.45237	0.34374	0.078707	0.076933	0.092964	0.10767	0.077825	0.092022	0.11493	0.076267	0.075976	0.075595	0.092439	0.093708	0.096998	0.14118	0.097298	0.14937	0.17542	0.075791	0.10594	0.095916	0.12334	0.095984	0.087661	0.090946	0.10468	0.11796	0.13505	0.11736	0.12528	0.161	0.075719	0.1669	0.10505	0.10597	0.10679	0.10644
774	0.23823	0.17488	0.15278	0.19518	0.20682	0.17503	0.14176	0.3225	0.36052	0.1163	0.27915	0.40436	0.29413	0.076315	0.075668	0.090245	0.097837	0.079583	0.084655	0.10129	0.075287	0.075338	0.075177	0.085134	0.085736	0.088069	0.14445	0.099555	0.15292	0.18074	0.074889	0.1083	0.098114	0.10608	0.098002	0.088633	0.092648	0.10693	0.12053	0.13811	0.1199	0.12798	0.1653	0.075343	0.17171	0.10739	0.10834	0.10917	0.10878
775	0.19678	0.14554	0.13005	0.16166	0.17063	0.14516	0.12047	0.27712	0.31288	0.10287	0.23379	0.35643	0.24759	0.075254	0.075402	0.088863	0.09137	0.081467	0.080055	0.092134	0.075222	0.075517	0.075511	0.080582	0.080711	0.082374	0.14785	0.10184	0.15664	0.18656	0.074882	0.1107	0.10034	0.094206	0.10008	0.089927	0.094482	0.10921	0.12314	0.14128	0.12248	0.13076	0.16991	0.075706	0.17689	0.10976	0.11074	0.11159	0.11116
776	0.16233	0.12341	0.1135	0.13554	0.14201	0.12265	0.10536	0.23481	0.26745	0.093805	0.19364	0.30952	0.20573	0.075139	0.075849	0.088458	0.087362	0.083441	0.077425	0.086253	0.07581	0.076277	0.076383	0.077989	0.077783	0.078981	0.1514	0.10414	0.16055	0.19298	0.075511	0.11314	0.10259	0.086358	0.10221	0.091457	0.096416	0.11152	0.12582	0.14456	0.12512	0.1336	0.17487	0.076598	0.18251	0.11217	0.11318	0.11404	0.11357
777	0.13552	0.10761	0.10201	0.11638	0.12075	0.10661	0.095087	0.19705	0.22569	0.087955	0.16014	0.26481	0.17009	0.075692	0.076799	0.088763	0.085121	0.085481	0.076189	0.082711	0.076861	0.077451	0.077635	0.076782	0.076337	0.077212	0.15511	0.10647	0.16469	0.20017	0.076592	0.11562	0.10487	0.081412	0.10439	0.093163	0.098427	0.11388	0.12857	0.14799	0.12782	0.13653	0.18026	0.077865	0.18867	0.11461	0.11566	0.11653	0.11602
778	0.11592	0.09681	0.094355	0.103	0.10578	0.095668	0.088386	0.16518	0.1891	0.084412	0.13397	0.22372	0.14167	0.076718	0.078107	0.089582	0.084141	0.087568	0.07594	0.080825	0.078241	0.078917	0.079158	0.076554	0.07594	0.076587	0.15903	0.10884	0.16908	0.20834	0.077992	0.11814	0.10718	0.078525	0.1066	0.094999	0.1005	0.11627	0.13138	0.15157	0.13059	0.13956	0.18618	0.079398	0.19548	0.1171	0.11818	0.11907	0.11851
779	0.10226	0.089724	0.089508	0.09403	0.095653	0.08849	0.084256	0.13987	0.15887	0.082522	0.1147	0.18776	0.12035	0.078081	0.079669	0.090778	0.084067	0.089692	0.076398	0.080121	0.079856	0.080592	0.080873	0.077026	0.076293	0.07678	0.16316	0.11123	0.17379	0.21783	0.079621	0.12071	0.10952	0.077109	0.10885	0.096936	0.10262	0.1187	0.13428	0.15532	0.13343	0.14268	0.19275	0.081121	0.20311	0.11962	0.12075	0.12166	0.12104
780	0.093114	0.085321	0.086685	0.088281	0.089094	0.084026	0.081957	0.1209	0.13539	0.081808	0.10119	0.15807	0.1052	0.079683	0.081411	0.092248	0.084639	0.091846	0.077357	0.080254	0.081637	0.082415	0.082726	0.077996	0.077178	0.077551	0.16756	0.11367	0.17888	0.22911	0.081412	0.12333	0.11189	0.076735	0.11114	0.098952	0.10479	0.12117	0.13727	0.15928	0.13635	0.14593	0.20013	0.08298	0.21181	0.1222	0.12338	0.1243	0.12363
781	0.087264	0.082829	0.085306	0.08484	0.085087	0.081495	0.080957	0.10739	0.11815	0.08193	0.092113	0.135	0.094873	0.081453	0.083281	0.09392	0.085671	0.094025	0.078672	0.08098	0.083537	0.084344	0.084678	0.079317	0.07844	0.078732	0.17226	0.11614	0.18444	0.24285	0.083317	0.12601	0.11429	0.077102	0.11346	0.10103	0.107	0.1237	0.14035	0.16347	0.13937	0.1493	0.20858	0.084936	0.22191	0.12483	0.12606	0.12701	0.12627
782	0.08376	0.081695	0.084956	0.083036	0.082889	0.080334	0.080879	0.098181	0.10609	0.082646	0.086275	0.11807	0.08813	0.083343	0.085243	0.095741	0.087033	0.096226	0.080239	0.082127	0.085522	0.08635	0.0867	0.080888	0.07997	0.080203	0.17734	0.11866	0.19058	0.26004	0.085305	0.12875	0.11674	0.077996	0.11583	0.10316	0.10925	0.12627	0.14355	0.16793	0.14249	0.15283	0.21841	0.086962	0.23386	0.12752	0.12881	0.12978	0.12896
783	0.081918	0.081524	0.085336	0.082392	0.081969	0.080144	0.081456	0.092182	0.098008	0.083784	0.082759	0.10622	0.083968	0.085318	0.08727	0.097674	0.088631	0.098449	0.081985	0.083573	0.08757	0.088411	0.088775	0.082636	0.081691	0.08188	0.18286	0.12122	0.19745	0.28202	0.087353	0.13157	0.11923	0.079263	0.11823	0.10534	0.11153	0.1289	0.14687	0.17271	0.14573	0.15653	0.2301	0.089041	0.24834	0.13027	0.13162	0.13262	0.13172
784	0.081251	0.082035	0.086236	0.08257	0.081953	0.080643	0.082498	0.088521	0.092862	0.085224	0.080896	0.098273	0.081646	0.087355	0.089346	0.099693	0.090399	0.10069	0.083859	0.085232	0.089664	0.090514	0.090891	0.084511	0.083546	0.083703	0.18894	0.12384	0.20527	0.3107	0.089445	0.13446	0.12176	0.080796	0.12068	0.10756	0.11385	0.13159	0.15033	0.17788	0.14909	0.16043	0.24434	0.09116	0.26629	0.13309	0.13452	0.13554	0.13456
785	0.081413	0.08303	0.087506	0.083329	0.082576	0.08163	0.083868	0.086539	0.089831	0.086877	0.080206	0.093218	0.080631	0.089437	0.09146	0.10178	0.09229	0.10296	0.085824	0.087043	0.091795	0.092651	0.093038	0.086475	0.085498	0.085629	0.19571	0.12651	0.21433	0.34863	0.091572	0.13744	0.12434	0.082517	0.12317	0.10983	0.11621	0.13434	0.15396	0.18352	0.15261	0.16457	0.2621	0.093312	0.28907	0.13599	0.1375	0.13855	0.13747
786	0.082163	0.084368	0.089039	0.084501	0.083651	0.082963	0.085473	0.085757	0.088311	0.088684	0.080349	0.090248	0.080542	0.091554	0.093603	0.10392	0.094273	0.10526	0.087856	0.088962	0.093955	0.094815	0.095213	0.088506	0.087519	0.087629	0.20336	0.12925	0.22499	0.39904	0.093727	0.14051	0.12698	0.084372	0.12571	0.11212	0.11861	0.13716	0.15777	0.18974	0.15629	0.16898	0.2848	0.095491	0.31865	0.13898	0.14057	0.14166	0.14046
787	0.083329	0.085951	0.090761	0.085964	0.085046	0.084543	0.087245	0.08583	0.087863	0.090603	0.081082	0.088768	0.081111	0.093699	0.095772	0.10612	0.096325	0.10757	0.089937	0.090962	0.096141	0.097004	0.097412	0.090585	0.089592	0.089685	0.21214	0.13205	0.2378	0.46543	0.095907	0.14368	0.12968	0.086323	0.1283	0.11446	0.12105	0.14007	0.1618	0.19667	0.16017	0.17373	0.31443	0.097694	0.35789	0.14206	0.14375	0.14487	0.14355
788	0.084789	0.087708	0.092619	0.087635	0.086668	0.086297	0.089137	0.08651	0.088177	0.092603	0.082234	0.088349	0.082147	0.095868	0.097963	0.10835	0.09843	0.10992	0.092056	0.093021	0.098351	0.099216	0.099634	0.092702	0.091705	0.091781	0.2224	0.13493	0.25348	0.54987	0.098108	0.14697	0.13244	0.088344	0.13095	0.11684	0.12354	0.14305	0.16608	0.2045	0.16428	0.17888	0.35372	0.099922	0.41064	0.14524	0.14704	0.14821	0.14674
789	0.086457	0.089589	0.094577	0.089455	0.088451	0.088176	0.091116	0.087623	0.089031	0.094665	0.083683	0.088681	0.083513	0.098058	0.10018	0.11062	0.10058	0.1123	0.094205	0.095126	0.10058	0.10145	0.10188	0.094849	0.093849	0.09391	0.23463	0.13789	0.27304	0.64903	0.10033	0.15038	0.13528	0.090416	0.13366	0.11926	0.12607	0.14614	0.17066	0.21346	0.16866	0.18451	0.4062	0.10217	0.48145	0.14854	0.15046	0.15167	0.15005
790	0.088274	0.091562	0.096609	0.091381	0.090349	0.090146	0.09316	0.089044	0.090268	0.096774	0.085343	0.089548	0.085115	0.10027	0.10241	0.11294	0.10277	0.11472	0.096381	0.097267	0.10284	0.10371	0.10415	0.097023	0.09602	0.096066	0.24953	0.14095	0.29786	0.74875	0.10258	0.15393	0.13819	0.092528	0.13643	0.12172	0.12865	0.14933	0.17559	0.22383	0.17335	0.1907	0.47569	0.10445	0.57347	0.15196	0.15402	0.15528	0.15349
791	0.090197	0.093601	0.098699	0.093386	0.092331	0.092183	0.095253	0.090685	0.091778	0.098922	0.087154	0.090795	0.086883	0.1025	0.10467	0.11529	0.10499	0.11717	0.09858	0.09944	0.10512	0.10599	0.10644	0.09922	0.098214	0.098245	0.26813	0.1441	0.32984	0.82524	0.10485	0.15764	0.14119	0.094672	0.13928	0.12422	0.13129	0.15263	0.18094	0.23601	0.1784	0.19759	0.56442	0.10675	0.68264	0.15553	0.15774	0.15905	0.15706
792	0.092199	0.095692	0.10083	0.09545	0.094376	0.094271	0.097386	0.092486	0.093484	0.1011	0.089073	0.092313	0.088772	0.10476	0.10695	0.11768	0.10724	0.11966	0.1008	0.10164	0.10743	0.1083	0.10877	0.10144	0.10043	0.10045	0.29192	0.14736	0.3713	0.86055	0.10714	0.16153	0.14429	0.096843	0.1422	0.12677	0.13398	0.15607	0.18677	0.25051	0.18389	0.2053	0.66825	0.10908	0.78982	0.15925	0.16164	0.16301	0.1608
793	0.094258	0.097824	0.10301	0.097559	0.096468	0.096399	0.099551	0.094402	0.095331	0.10331	0.091071	0.094024	0.090748	0.10703	0.10926	0.12011	0.10952	0.1222	0.10305	0.10387	0.10976	0.11063	0.11112	0.10368	0.10267	0.10267	0.32306	0.15075	0.42482	0.85624	0.10946	0.16562	0.1475	0.099039	0.14521	0.12938	0.13674	0.15965	0.1932	0.26802	0.1899	0.21401	0.77055	0.11144	0.86474	0.16315	0.16573	0.16718	0.16471
794	0.096362	0.09999	0.10522	0.099706	0.098598	0.098559	0.10175	0.096404	0.097281	0.10555	0.093127	0.095876	0.092788	0.10934	0.11159	0.12258	0.11184	0.12478	0.10532	0.10612	0.11213	0.113	0.1135	0.10595	0.10494	0.10491	0.36464	0.15427	0.49228	0.82604	0.11181	0.16993	0.15083	0.10126	0.14831	0.13204	0.13956	0.16339	0.20035	0.2895	0.19653	0.22397	0.84494	0.11383	0.89009	0.16725	0.17005	0.17158	0.16883
795	0.098502	0.10219	0.10746	0.10188	0.10076	0.10075	0.10397	0.09847	0.099308	0.10782	0.095229	0.097832	0.094877	0.11167	0.11396	0.1251	0.11419	0.12742	0.10761	0.1084	0.11453	0.1154	0.11592	0.10824	0.10722	0.10718	0.42081	0.15794	0.57311	0.7818	0.11419	0.1745	0.15429	0.1035	0.15152	0.13476	0.14246	0.16732	0.20839	0.31626	0.20393	0.23547	0.87419	0.11626	0.87474	0.17158	0.17464	0.17625	0.17317
796	0.10067	0.10441	0.10972	0.10409	0.10295	0.10296	0.10621	0.10059	0.1014	0.11012	0.097367	0.099864	0.097005	0.11402	0.11636	0.12767	0.11657	0.13012	0.10993	0.11071	0.11696	0.11784	0.11838	0.11056	0.10954	0.10948	0.49631	0.16178	0.66134	0.73027	0.11661	0.17936	0.1579	0.10577	0.15484	0.13755	0.14545	0.17145	0.21753	0.35008	0.21227	0.2489	0.86324	0.11873	0.8368	0.17617	0.17951	0.18123	0.17778
797	0.10287	0.10666	0.11202	0.10633	0.10516	0.10521	0.10849	0.10275	0.10353	0.11244	0.099535	0.10196	0.099165	0.11642	0.11879	0.13029	0.11899	0.13288	0.11228	0.11304	0.11944	0.12031	0.12088	0.11291	0.11188	0.1118	0.59397	0.16581	0.74367	0.67521	0.11906	0.18456	0.16168	0.10806	0.15829	0.14041	0.14852	0.17583	0.22807	0.39323	0.2218	0.26475	0.8277	0.12124	0.78789	0.18105	0.18473	0.18657	0.18269
798	0.10509	0.10894	0.11436	0.10859	0.10741	0.10747	0.11079	0.10495	0.1057	0.1148	0.10173	0.1041	0.10135	0.11884	0.12127	0.13296	0.12144	0.13571	0.11466	0.11541	0.12196	0.12283	0.12342	0.11528	0.11426	0.11414	0.70783	0.17006	0.80328	0.6187	0.12155	0.19016	0.16565	0.11037	0.16187	0.14334	0.15169	0.18049	0.24039	0.44835	0.23282	0.28365	0.77929	0.1238	0.73373	0.18628	0.19035	0.19233	0.18794
799	0.10734	0.11124	0.11672	0.11087	0.10967	0.10977	0.11312	0.10718	0.10791	0.11719	0.10395	0.10628	0.10357	0.12131	0.12378	0.1357	0.12394	0.13862	0.11708	0.11781	0.12452	0.1254	0.12601	0.1177	0.11666	0.11652	0.8146	0.17455	0.82976	0.56183	0.12409	0.19623	0.16984	0.11272	0.16562	0.14636	0.15496	0.18547	0.25502	0.5176	0.24574	0.30637	0.72431	0.12641	0.67736	0.19192	0.19644	0.19858	0.19361
800	0.10962	0.11358	0.11912	0.11319	0.11197	0.11209	0.11548	0.10944	0.11016	0.11962	0.1062	0.1085	0.10581	0.12381	0.12634	0.1385	0.12649	0.14161	0.11954	0.12025	0.12714	0.12801	0.12866	0.12015	0.11911	0.11894	0.8818	0.17931	0.82505	0.50521	0.12668	0.20284	0.17429	0.1151	0.16954	0.14947	0.15836	0.19083	0.27264	0.60051	0.26112	0.3338	0.66618	0.12907	0.62035	0.19803	0.20308	0.20542	0.19977
801	0.11192	0.11595	0.12155	0.11554	0.11429	0.11445	0.11788	0.11173	0.11243	0.12208	0.10847	0.11075	0.10807	0.12636	0.12895	0.14137	0.12908	0.14468	0.12203	0.12273	0.12981	0.13069	0.13136	0.12264	0.12159	0.12139	0.89605	0.18439	0.79816	0.4492	0.12931	0.21012	0.17903	0.11751	0.17367	0.15268	0.16188	0.19663	0.2942	0.69002	0.27969	0.36696	0.60674	0.13179	0.56346	0.20471	0.21038	0.21296	0.2065
802	0.11425	0.11835	0.12403	0.11792	0.11664	0.11683	0.12031	0.11405	0.11473	0.12459	0.11077	0.11303	0.11037	0.12896	0.13162	0.14432	0.13173	0.14786	0.12457	0.12525	0.13254	0.13342	0.13413	0.12517	0.12412	0.12388	0.871	0.18984	0.75764	0.39417	0.13201	0.21819	0.18411	0.11996	0.17802	0.156	0.16556	0.20297	0.32095	0.77015	0.30243	0.40684	0.54696	0.13458	0.50706	0.21207	0.21849	0.22136	0.21394
803	0.11661	0.12078	0.12655	0.12033	0.11902	0.11925	0.12278	0.11641	0.11707	0.12714	0.1131	0.11534	0.11269	0.13161	0.13434	0.14735	0.13443	0.15115	0.12716	0.12781	0.13533	0.13621	0.13696	0.12775	0.1267	0.12641	0.82598	0.19572	0.70918	0.34063	0.13477	0.22725	0.1896	0.12245	0.18264	0.15945	0.16939	0.20994	0.35456	0.82194	0.33064	0.45417	0.48744	0.13743	0.45138	0.22026	0.22759	0.23081	0.22225
804	0.119	0.12326	0.12911	0.12278	0.12144	0.12171	0.12529	0.1188	0.11944	0.12974	0.11546	0.11769	0.11504	0.13432	0.13713	0.15048	0.13719	0.15456	0.1298	0.13043	0.1382	0.13908	0.13987	0.13038	0.12932	0.129	0.77165	0.20209	0.6562	0.2894	0.13759	0.23752	0.19557	0.12499	0.18756	0.16303	0.17342	0.21769	0.39711	0.83667	0.36604	0.50891	0.42863	0.14037	0.39665	0.22948	0.23792	0.24159	0.23164
805	0.12143	0.12578	0.13172	0.12527	0.1239	0.12421	0.12785	0.12123	0.12184	0.13239	0.11785	0.12007	0.11742	0.13709	0.13999	0.1537	0.14003	0.1581	0.13249	0.1331	0.14115	0.14203	0.14287	0.13307	0.132	0.13163	0.7128	0.20907	0.60079	0.24173	0.14049	0.24934	0.20212	0.12757	0.19284	0.16676	0.17765	0.2264	0.45093	0.82035	0.41069	0.56946	0.37107	0.14339	0.34327	0.24	0.2498	0.25405	0.24241
806	0.1239	0.12834	0.13439	0.12781	0.12639	0.12675	0.13045	0.12369	0.12428	0.13511	0.12027	0.12248	0.11984	0.13993	0.14293	0.15704	0.14293	0.16179	0.13525	0.13583	0.14418	0.14506	0.14595	0.13582	0.13475	0.13431	0.65207	0.21675	0.5442	0.19917	0.14347	0.26314	0.20938	0.1302	0.19853	0.17065	0.18212	0.23628	0.51784	0.78446	0.46676	0.63181	0.31555	0.1465	0.292	0.25217	0.26368	0.26869	0.25495
807	0.1264	0.13096	0.13712	0.13039	0.12893	0.12935	0.13311	0.1262	0.12676	0.13788	0.12274	0.12493	0.12229	0.14284	0.14594	0.16049	0.14592	0.16564	0.13808	0.13862	0.1473	0.14818	0.14913	0.13864	0.13755	0.13706	0.59079	0.22529	0.48719	0.16326	0.14654	0.27953	0.21752	0.13289	0.20473	0.17474	0.18687	0.24765	0.59727	0.73782	0.53555	0.68923	0.2633	0.14971	0.24402	0.2665	0.28017	0.2862	0.26986
808	0.12896	0.13362	0.1399	0.13302	0.13151	0.13199	0.13583	0.12875	0.12928	0.14072	0.12524	0.12743	0.12479	0.14584	0.14905	0.16408	0.14899	0.16968	0.14098	0.14148	0.15053	0.1514	0.15242	0.14152	0.14043	0.13987	0.52968	0.23488	0.43039	0.13485	0.1497	0.29938	0.22675	0.13564	0.21152	0.17904	0.19193	0.26088	0.68291	0.68547	0.61529	0.73367	0.21598	0.15304	0.20095	0.2837	0.30014	0.30757	0.28797
809	0.13155	0.13635	0.14276	0.1357	0.13414	0.13469	0.13861	0.13135	0.13184	0.14363	0.12779	0.12996	0.12733	0.14892	0.15226	0.16782	0.15216	0.17392	0.14395	0.14442	0.15387	0.15474	0.15582	0.14448	0.14339	0.14275	0.46918	0.24578	0.37445	0.11368	0.15297	0.32393	0.23738	0.13845	0.21904	0.18359	0.19737	0.27648	0.76048	0.63031	0.6978	0.75899	0.17538	0.15648	0.16439	0.30481	0.32486	0.33422	0.31049
810	0.1342	0.13914	0.14568	0.13845	0.13683	0.13745	0.14145	0.134	0.13445	0.14663	0.13039	0.13255	0.12991	0.15209	0.15557	0.17173	0.15543	0.1784	0.14702	0.14744	0.15733	0.15819	0.15936	0.14753	0.14643	0.14571	0.40969	0.25833	0.32021	0.098648	0.15635	0.35498	0.24978	0.14134	0.22745	0.18841	0.20325	0.29504	0.81253	0.57404	0.76773	0.76361	0.1428	0.16006	0.13532	0.33133	0.35612	0.36819	0.33928
811	0.13691	0.14199	0.14869	0.14126	0.13958	0.14027	0.14437	0.13671	0.13712	0.14971	0.13304	0.13518	0.13255	0.15537	0.15901	0.17582	0.15881	0.18314	0.15018	0.15055	0.16093	0.16178	0.16304	0.15067	0.14956	0.14875	0.35181	0.27296	0.26891	0.088372	0.15986	0.39511	0.26444	0.1443	0.23694	0.19356	0.20966	0.31722	0.83014	0.51763	0.80965	0.75012	0.11834	0.16379	0.1136	0.3655	0.39653	0.41235	0.37701
812	0.13968	0.14492	0.15178	0.14413	0.14239	0.14317	0.14737	0.13948	0.13984	0.15289	0.13574	0.13786	0.13524	0.15877	0.16257	0.18012	0.16233	0.18818	0.15344	0.15376	0.16467	0.16552	0.16688	0.15391	0.15279	0.15189	0.29647	0.29032	0.22213	0.081597	0.16351	0.44785	0.28202	0.14735	0.24776	0.19908	0.21669	0.34369	0.81732	0.46172	0.81817	0.72288	0.10097	0.16769	0.098164	0.41053	0.44961	0.47035	0.42745
813	0.14251	0.14793	0.15497	0.14708	0.14526	0.14615	0.15045	0.14231	0.14261	0.15617	0.1385	0.1406	0.13799	0.16229	0.16628	0.18465	0.16598	0.19356	0.15681	0.15708	0.16859	0.16943	0.1709	0.15727	0.15614	0.15512	0.24507	0.31124	0.18161	0.077351	0.16731	0.51738	0.30331	0.15049	0.26018	0.20504	0.22447	0.37504	0.78433	0.40676	0.79948	0.68606	0.089134	0.17177	0.087609	0.47068	0.51953	0.54586	0.49518
814	0.14541	0.15103	0.15826	0.15011	0.14822	0.14921	0.15363	0.14521	0.14546	0.15956	0.14134	0.1434	0.1408	0.16595	0.17015	0.18945	0.16978	0.19934	0.16032	0.16051	0.17269	0.17352	0.17511	0.16074	0.1596	0.15846	0.19943	0.33694	0.14865	0.07492	0.17129	0.60653	0.32931	0.15373	0.27456	0.21152	0.23314	0.41162	0.73963	0.35326	0.76331	0.64287	0.081344	0.17605	0.080648	0.55045	0.60901	0.63944	0.58356
815	0.14839	0.15422	0.16166	0.15323	0.15125	0.15236	0.15691	0.14819	0.14837	0.16308	0.14424	0.14627	0.14368	0.16976	0.1742	0.19456	0.17377	0.20559	0.16395	0.16408	0.177	0.17782	0.17955	0.16435	0.1632	0.16192	0.16129	0.36909	0.12354	0.073795	0.17547	0.71089	0.36128	0.15708	0.29132	0.21861	0.24291	0.45338	0.68841	0.30195	0.71697	0.5956	0.076446	0.18057	0.076282	0.65056	0.71336	0.74201	0.68885
816	0.15145	0.15752	0.16519	0.15645	0.15436	0.15561	0.16031	0.15125	0.15135	0.16674	0.14721	0.14921	0.14664	0.17375	0.17846	0.20002	0.17794	0.21237	0.16775	0.16779	0.18154	0.18235	0.18424	0.1681	0.16695	0.16551	0.13156	0.40997	0.10547	0.073608	0.17986	0.81141	0.40064	0.16056	0.31097	0.22643	0.25401	0.49967	0.63371	0.2539	0.66495	0.54582	0.073594	0.18535	0.073776	0.75984	0.81326	0.831	0.79255
817	0.1546	0.16093	0.16886	0.15977	0.15758	0.15897	0.16383	0.15439	0.15442	0.17056	0.15028	0.15223	0.14968	0.17793	0.18293	0.20589	0.18233	0.2198	0.17171	0.17167	0.18635	0.18715	0.18922	0.17202	0.17086	0.16924	0.10985	0.46254	0.093013	0.074097	0.18449	0.87863	0.44886	0.16416	0.33414	0.23513	0.26675	0.5489	0.5773	0.21052	0.60989	0.4946	0.072198	0.19043	0.072604	0.85036	0.8794	0.8811	0.86465
818	0.15785	0.16446	0.17267	0.1632	0.16089	0.16246	0.16749	0.15764	0.15757	0.17454	0.15343	0.15532	0.15281	0.18232	0.18767	0.21224	0.18698	0.22799	0.17586	0.17572	0.19146	0.19224	0.19452	0.17612	0.17495	0.17313	0.094752	0.52992	0.084732	0.075071	0.1894	0.89678	0.50689	0.16791	0.36161	0.24491	0.28153	0.59823	0.52025	0.17333	0.55335	0.44276	0.071838	0.19585	0.072393	0.89439	0.89657	0.88578	0.88737
819	0.16121	0.16814	0.17666	0.16677	0.16432	0.16607	0.1713	0.16099	0.16082	0.17872	0.15668	0.15851	0.15604	0.18695	0.19269	0.21916	0.1919	0.23711	0.18022	0.17998	0.19692	0.19768	0.2002	0.18043	0.17924	0.17721	0.084634	0.61353	0.079463	0.076395	0.19463	0.8758	0.57394	0.17183	0.39417	0.25602	0.29889	0.64356	0.46323	0.14332	0.49632	0.39101	0.072218	0.20166	0.072871	0.89	0.87507	0.8584	0.86913
820	0.16468	0.17197	0.18083	0.17047	0.16788	0.16984	0.17528	0.16445	0.16416	0.18312	0.16004	0.1618	0.15937	0.19186	0.19804	0.22676	0.19715	0.24736	0.18481	0.18447	0.20276	0.20351	0.2063	0.18496	0.18377	0.18148	0.078097	0.70841	0.076345	0.077969	0.20022	0.83364	0.64553	0.17593	0.43255	0.26879	0.31948	0.68018	0.40684	0.12055	0.4395	0.34017	0.073126	0.20791	0.073844	0.85515	0.83271	0.81404	0.828
821	0.16829	0.17596	0.18521	0.17432	0.17156	0.17376	0.17945	0.16804	0.16762	0.18776	0.16351	0.16518	0.16281	0.19708	0.20378	0.23517	0.20279	0.25899	0.18968	0.18922	0.20907	0.2098	0.2129	0.18975	0.18855	0.18597	0.074093	0.79822	0.074755	0.079723	0.20623	0.78154	0.71232	0.18023	0.47705	0.28365	0.34411	0.70404	0.35173	0.10416	0.38355	0.29123	0.07441	0.2147	0.075174	0.80589	0.78054	0.76137	0.77598
822	0.17203	0.18015	0.18983	0.17835	0.17541	0.17787	0.18383	0.17177	0.1712	0.19268	0.16712	0.16869	0.16638	0.20266	0.20995	0.24458	0.20886	0.27237	0.19485	0.19428	0.21591	0.21662	0.2201	0.19483	0.19362	0.19072	0.071881	0.85933	0.074254	0.081606	0.21272	0.72464	0.76211	0.18475	0.52697	0.30115	0.37368	0.7131	0.29882	0.092818	0.32926	0.24549	0.075963	0.2221	0.076757	0.74981	0.72365	0.70468	0.7186
823	0.17594	0.18455	0.19472	0.18256	0.17941	0.18218	0.18846	0.17564	0.17491	0.19792	0.17087	0.17232	0.17009	0.20866	0.21664	0.25521	0.21546	0.28795	0.20036	0.19967	0.22337	0.22406	0.22798	0.20025	0.19902	0.19575	0.070943	0.87833	0.07453	0.083584	0.21979	0.66572	0.78622	0.18953	0.57988	0.32198	0.4091	0.70767	0.24941	0.085253	0.27773	0.20445	0.077706	0.23022	0.078524	0.69054	0.66477	0.64634	0.65881
824	0.18001	0.18919	0.19992	0.18699	0.18361	0.18672	0.19335	0.17968	0.17876	0.20354	0.17477	0.17608	0.17395	0.21514	0.22394	0.26735	0.22268	0.30636	0.20628	0.20548	0.23157	0.23225	0.23669	0.20605	0.20481	0.20111	0.070912	0.86105	0.075362	0.085631	0.22753	0.60628	0.78386	0.1946	0.63124	0.34695	0.45097	0.68977	0.20515	0.080422	0.23042	0.16956	0.079584	0.23922	0.080422	0.63014	0.60539	0.58762	0.59819
825	0.18429	0.1941	0.20548	0.19166	0.18801	0.19152	0.19856	0.18391	0.18277	0.20959	0.17884	0.17999	0.17797	0.22219	0.23197	0.28136	0.23065	0.32844	0.21265	0.21176	0.24066	0.24134	0.24638	0.2123	0.21103	0.20684	0.071529	0.82253	0.076589	0.08773	0.23608	0.54706	0.76087	0.19999	0.67482	0.377	0.49912	0.66212	0.16767	0.077559	0.18901	0.14164	0.08156	0.24926	0.082414	0.56963	0.54624	0.52915	0.5376
826	0.18878	0.19932	0.21145	0.19661	0.19265	0.19661	0.20412	0.18833	0.18695	0.21614	0.18311	0.18407	0.18219	0.22992	0.24086	0.29771	0.23953	0.35534	0.21957	0.2186	0.25082	0.2515	0.25729	0.21906	0.21776	0.213	0.072608	0.77339	0.078098	0.089871	0.2456	0.48847	0.72421	0.20576	0.70471	0.413	0.55192	0.62728	0.13794	0.076107	0.1549	0.1206	0.083605	0.26058	0.084477	0.50958	0.48773	0.4713	0.47754
827	0.19352	0.2049	0.21791	0.20187	0.19755	0.20204	0.21011	0.19298	0.19132	0.22331	0.18759	0.18832	0.18661	0.23846	0.2508	0.31692	0.24952	0.38857	0.22711	0.22611	0.26229	0.263	0.26968	0.22642	0.2251	0.21967	0.074016	0.71892	0.079808	0.092045	0.25631	0.4308	0.6792	0.21196	0.71756	0.45553	0.60565	0.58739	0.11584	0.07567	0.12861	0.10554	0.085702	0.27347	0.086592	0.45034	0.43013	0.41439	0.41843
828	0.19854	0.21089	0.22494	0.20748	0.20276	0.20785	0.21658	0.19788	0.19591	0.23119	0.19231	0.19278	0.19126	0.24798	0.26204	0.33965	0.26087	0.43012	0.23541	0.23445	0.27536	0.27613	0.2839	0.2345	0.23314	0.22693	0.075659	0.66192	0.081661	0.094249	0.26848	0.37441	0.6292	0.21866	0.71368	0.50432	0.65447	0.5441	0.10022	0.075965	0.1095	0.095183	0.087839	0.2883	0.088749	0.39229	0.37382	0.35882	0.36079
829	0.20387	0.21737	0.23264	0.21352	0.20831	0.21412	0.22363	0.20305	0.20073	0.23995	0.1973	0.19745	0.19617	0.25871	0.2749	0.36657	0.27388	0.48223	0.2446	0.24378	0.29044	0.29132	0.30044	0.24345	0.24203	0.2349	0.077467	0.60407	0.083618	0.096481	0.28248	0.31988	0.57638	0.22595	0.69577	0.5576	0.6919	0.49863	0.089625	0.076788	0.096241	0.088351	0.090006	0.30557	0.09094	0.33602	0.31937	0.30529	0.30545
830	0.20957	0.22441	0.24116	0.22004	0.21427	0.22091	0.23136	0.20855	0.20581	0.24976	0.20259	0.20237	0.20136	0.27095	0.28978	0.39831	0.28895	0.54681	0.25487	0.25433	0.30804	0.30912	0.31989	0.25343	0.25194	0.24372	0.079394	0.54622	0.085649	0.098739	0.29878	0.26825	0.52211	0.23392	0.66738	0.61134	0.71309	0.45192	0.082696	0.077993	0.087372	0.08408	0.092201	0.32594	0.09316	0.28246	0.26781	0.25495	0.2537
831	0.2157	0.23212	0.25066	0.22713	0.2207	0.22832	0.23992	0.2144	0.21119	0.26087	0.20822	0.20756	0.20689	0.28508	0.30726	0.43524	0.30655	0.62345	0.26647	0.2664	0.32884	0.33026	0.3431	0.26468	0.26308	0.25356	0.081406	0.48884	0.087736	0.10102	0.31802	0.221	0.46732	0.24271	0.63164	0.65947	0.71667	0.40479	0.078395	0.079474	0.081681	0.081652	0.094419	0.35026	0.095409	0.23307	0.22064	0.20941	0.20725
832	0.22232	0.24064	0.26133	0.23491	0.22768	0.23647	0.24947	0.22065	0.2169	0.27358	0.21425	0.21305	0.2128	0.30163	0.32808	0.47716	0.32722	0.70618	0.27969	0.28038	0.35376	0.35569	0.3711	0.2775	0.27575	0.26467	0.083478	0.43225	0.089865	0.10334	0.34107	0.1799	0.41274	0.25248	0.59092	0.69532	0.70448	0.358	0.075961	0.081155	0.078257	0.080543	0.096661	0.37962	0.097685	0.18962	0.17962	0.17041	0.16789
833	0.22952	0.25012	0.27345	0.24349	0.23532	0.24551	0.26025	0.22737	0.22299	0.28825	0.22072	0.21889	0.21913	0.32133	0.35325	0.52291	0.35159	0.78078	0.29495	0.29674	0.38395	0.38669	0.40527	0.29228	0.29033	0.27734	0.085595	0.37683	0.092029	0.10568	0.36905	0.14639	0.35911	0.26343	0.54693	0.71434	0.67997	0.31238	0.074861	0.082982	0.076449	0.08038	0.098926	0.4154	0.099988	0.15373	0.14618	0.13916	0.13675
834	0.23741	0.26078	0.28731	0.25306	0.24374	0.25564	0.27254	0.23461	0.2295	0.30537	0.22772	0.22513	0.22596	0.34515	0.38412	0.56999	0.38029	0.83	0.31278	0.31612	0.42087	0.42482	0.4472	0.30954	0.3073	0.29199	0.087747	0.32313	0.094222	0.10806	0.40343	0.12089	0.30734	0.27582	0.50087	0.71556	0.64656	0.26896	0.074709	0.084917	0.075789	0.080891	0.10122	0.45917	0.10232	0.12609	0.12075	0.11576	0.11371
835	0.24613	0.27288	0.30331	0.26382	0.25312	0.26709	0.28671	0.24246	0.2365	0.32553	0.23531	0.2318	0.23337	0.37442	0.42236	0.6145	0.41391	0.84466	0.33388	0.33931	0.46617	0.47183	0.49852	0.32996	0.32731	0.30916	0.089928	0.27212	0.096442	0.11048	0.44601	0.1026	0.25868	0.29	0.45365	0.70133	0.60703	0.22894	0.075234	0.086931	0.075949	0.081885	0.10353	0.51235	0.10469	0.10609	0.10251	0.099153	0.097547
836	0.25585	0.28675	0.32191	0.27604	0.26367	0.28018	0.30324	0.25103	0.24406	0.34944	0.24362	0.23898	0.24144	0.41089	0.46991	0.65179	0.45277	0.82907	0.35916	0.36727	0.52128	0.52916	0.56006	0.35447	0.35123	0.32957	0.092132	0.22518	0.098687	0.11293	0.49863	0.090038	0.21464	0.30641	0.40601	0.67529	0.56342	0.19357	0.076243	0.089007	0.076695	0.083224	0.10588	0.57533	0.10709	0.092281	0.089983	0.087849	0.08664
837	0.26679	0.30283	0.34364	0.29006	0.27567	0.29533	0.32274	0.26042	0.25227	0.37793	0.25276	0.24675	0.25031	0.45666	0.52838	0.67765	0.49663	0.79397	0.38982	0.40114	0.58639	0.59663	0.63028	0.38423	0.38017	0.35422	0.094359	0.18403	0.10096	0.11543	0.56235	0.081713	0.17682	0.3256	0.35869	0.64093	0.51721	0.1639	0.077596	0.091131	0.077857	0.08481	0.10826	0.64571	0.10952	0.083077	0.081683	0.08042	0.07953
838	0.27924	0.32165	0.3691	0.30632	0.28948	0.31306	0.34599	0.27078	0.26124	0.41189	0.26289	0.25519	0.26011	0.51376	0.59752	0.6898	0.54426	0.74798	0.42732	0.44205	0.65832	0.67006	0.70278	0.42071	0.41556	0.3844	0.096609	0.15013	0.10326	0.11797	0.63544	0.076426	0.1463	0.34834	0.31256	0.60099	0.46949	0.14034	0.079195	0.093295	0.079315	0.086573	0.11067	0.71607	0.112	0.077179	0.076412	0.075767	0.075122
839	0.29357	0.34388	0.39886	0.32537	0.30558	0.33407	0.37395	0.28229	0.2711	0.4521	0.27421	0.26441	0.27103	0.5828	0.67279	0.68823	0.59303	0.69615	0.47325	0.49081	0.72862	0.73957	0.76584	0.46551	0.459	0.42174	0.098881	0.12405	0.10558	0.12057	0.71076	0.073293	0.12319	0.37558	0.26869	0.55744	0.42112	0.12261	0.080969	0.095493	0.080985	0.088466	0.11312	0.77443	0.11453	0.073618	0.073291	0.073082	0.072621
840	0.31027	0.37033	0.43338	0.34789	0.3246	0.35924	0.40773	0.29517	0.28201	0.49881	0.28698	0.27455	0.2833	0.66011	0.74307	0.6748	0.63877	0.64127	0.52888	0.54708	0.78423	0.79132	0.80647	0.51991	0.51197	0.46808	0.10118	0.10515	0.10794	0.12322	0.77487	0.071694	0.10662	0.4085	0.22837	0.51168	0.37291	0.10986	0.082868	0.097722	0.082805	0.090453	0.11561	0.80906	0.1171	0.07172	0.071701	0.071802	0.071476
841	0.32996	0.40193	0.47274	0.37468	0.34733	0.38963	0.4484	0.30968	0.29416	0.55117	0.3015	0.28576	0.2972	0.73505	0.79381	0.65204	0.67644	0.58502	0.59391	0.60822	0.81399	0.81523	0.8183	0.58371	0.57478	0.52486	0.1035	0.092074	0.11033	0.12594	0.81389	0.071188	0.095234	0.44847	0.1929	0.46475	0.32575	0.10107	0.084857	0.099981	0.084734	0.092511	0.11815	0.81564	0.11973	0.071001	0.0712	0.071522	0.071296
842	0.35344	0.43957	0.51638	0.40665	0.3748	0.42644	0.49667	0.32614	0.3078	0.6064	0.31818	0.29826	0.31311	0.79157	0.81487	0.62243	0.70154	0.52836	0.66457	0.66828	0.81512	0.81069	0.80439	0.6534	0.64483	0.59186	0.10585	0.083343	0.11275	0.12872	0.82184	0.071461	0.087701	0.49683	0.16334	0.41745	0.28069	0.095258	0.086912	0.10227	0.086742	0.094625	0.12074	0.79842	0.12242	0.071123	0.071477	0.071956	0.071803
843	0.38174	0.48393	0.56263	0.44468	0.40822	0.47081	0.55204	0.34495	0.32322	0.65916	0.33753	0.31226	0.3315	0.81725	0.80728	0.58801	0.71171	0.47186	0.73156	0.71821	0.79367	0.78505	0.77288	0.72017	0.71422	0.6646	0.10824	0.077749	0.11522	0.13159	0.80388	0.072292	0.082953	0.55417	0.14002	0.37051	0.23898	0.091654	0.089018	0.10459	0.088808	0.096783	0.12339	0.76525	0.12518	0.071847	0.072311	0.072902	0.072801
844	0.41602	0.5348	0.60845	0.48934	0.44886	0.52319	0.61163	0.36656	0.3408	0.70233	0.36018	0.32808	0.35293	0.81216	0.77915	0.55029	0.70728	0.41598	0.78177	0.74942	0.75749	0.74609	0.73058	0.77139	0.7702	0.73232	0.11066	0.074398	0.11773	0.13454	0.76889	0.073521	0.080201	0.61902	0.12257	0.32473	0.20195	0.089659	0.091163	0.10695	0.090921	0.09898	0.1261	0.72232	0.12801	0.073001	0.073543	0.074213	0.074148
845	0.45748	0.59034	0.64959	0.54027	0.49762	0.58236	0.6693	0.39152	0.36097	0.72963	0.38692	0.34606	0.37815	0.7846	0.73813	0.51041	0.69036	0.36123	0.80563	0.75827	0.71242	0.69919	0.68199	0.79735	0.80139	0.78093	0.11311	0.072641	0.12029	0.13758	0.72368	0.075034	0.078868	0.68587	0.11006	0.28106	0.17072	0.088827	0.09334	0.10934	0.09307	0.10121	0.12888	0.67371	0.13093	0.07446	0.075057	0.075784	0.075744
846	0.50692	0.64609	0.68147	0.59531	0.55409	0.64402	0.71644	0.42037	0.38425	0.73826	0.41867	0.36662	0.40799	0.74308	0.68957	0.4692	0.6637	0.30836	0.80254	0.74674	0.66228	0.64784	0.62996	0.7967	0.80477	0.80126	0.11561	0.072021	0.1229	0.14073	0.67274	0.076749	0.078547	0.74458	0.10145	0.24061	0.1458	0.088835	0.095547	0.11177	0.095251	0.10348	0.13174	0.62199	0.13393	0.076135	0.076773	0.077539	0.077515
847	0.56379	0.69504	0.70053	0.6497	0.61525	0.70024	0.7454	0.45365	0.41121	0.72941	0.45639	0.39023	0.44342	0.69354	0.63682	0.42734	0.62988	0.2585	0.77858	0.71971	0.60942	0.59413	0.57617	0.77484	0.78532	0.79416	0.11816	0.072213	0.12557	0.14399	0.61873	0.078607	0.078946	0.78377	0.09578	0.20459	0.12696	0.089449	0.09778	0.11424	0.097461	0.10578	0.13468	0.56869	0.13704	0.077964	0.078632	0.079425	0.079411
848	0.62484	0.72965	0.7054	0.69632	0.6742	0.74154	0.75312	0.49161	0.44241	0.7066	0.50084	0.41741	0.48525	0.63958	0.58184	0.38538	0.591	0.21322	0.74092	0.6821	0.55522	0.53929	0.52163	0.73872	0.75038	0.76675	0.12076	0.072984	0.12831	0.14739	0.56321	0.080566	0.07986	0.7973	0.092267	0.17403	0.11335	0.090501	0.10004	0.11676	0.099698	0.10811	0.13772	0.51475	0.14026	0.079902	0.080592	0.081405	0.081394
849	0.68305	0.74517	0.69685	0.72792	0.72132	0.76143	0.7416	0.534	0.47824	0.67365	0.55201	0.44862	0.5338	0.58329	0.52584	0.34394	0.54865	0.17422	0.69498	0.63765	0.50052	0.48412	0.46698	0.69379	0.70592	0.72636	0.12342	0.074169	0.13111	0.15094	0.50713	0.082598	0.08114	0.78696	0.090326	0.14942	0.10391	0.09187	0.10233	0.11933	0.10196	0.11048	0.14086	0.46075	0.1436	0.081917	0.082625	0.083452	0.083441
850	0.72878	0.74141	0.67698	0.74036	0.74837	0.75933	0.71532	0.57948	0.51866	0.63378	0.60821	0.48413	0.58804	0.52595	0.4696	0.30369	0.50401	0.14277	0.64426	0.58895	0.44589	0.42917	0.41274	0.64369	0.65592	0.67822	0.12614	0.075649	0.13399	0.15465	0.45112	0.084683	0.082682	0.75892	0.089526	0.13059	0.097623	0.09347	0.10464	0.12195	0.10426	0.11288	0.14413	0.40717	0.14709	0.083988	0.08471	0.085549	0.085534
851	0.75408	0.72162	0.64827	0.73399	0.7527	0.73918	0.67879	0.62524	0.56269	0.58933	0.6649	0.52376	0.64455	0.46838	0.41373	0.26546	0.45795	0.11901	0.59092	0.53773	0.39183	0.37501	0.35944	0.59067	0.60282	0.62566	0.12893	0.077339	0.13696	0.15856	0.39574	0.086809	0.084411	0.71935	0.089551	0.11682	0.093671	0.09524	0.10699	0.12464	0.10658	0.11533	0.14754	0.35455	0.15073	0.0861	0.086836	0.087683	0.087661
852	0.75659	0.69003	0.61301	0.71218	0.73717	0.70614	0.63553	0.66685	0.60793	0.54194	0.7146	0.56644	0.6969	0.41123	0.35888	0.23018	0.41122	0.10204	0.53627	0.48514	0.33896	0.32234	0.30784	0.53611	0.54811	0.57068	0.13179	0.079177	0.14003	0.16268	0.34165	0.088965	0.086275	0.67277	0.090172	0.10712	0.091412	0.097137	0.10937	0.1274	0.10894	0.11782	0.1511	0.30363	0.15456	0.088244	0.088993	0.089847	0.089816
853	0.73955	0.65036	0.57302	0.6791	0.70702	0.66458	0.58797	0.69911	0.65025	0.49275	0.74903	0.60978	0.73685	0.35524	0.30594	0.19878	0.36453	0.090417	0.48113	0.43205	0.28818	0.27222	0.25905	0.48093	0.49272	0.51451	0.13474	0.081121	0.1432	0.16707	0.28978	0.091147	0.088238	0.62209	0.091225	0.10054	0.090381	0.09913	0.11179	0.13023	0.11133	0.12036	0.15485	0.25555	0.15859	0.090413	0.091176	0.092037	0.091994
854	0.70819	0.60536	0.52971	0.6383	0.66699	0.61761	0.53776	0.71782	0.68441	0.44262	0.7631	0.6499	0.75798	0.30139	0.25617	0.17203	0.3187	0.082757	0.42611	0.37926	0.24078	0.22611	0.21461	0.42578	0.43732	0.45802	0.13779	0.083141	0.1465	0.17175	0.24149	0.093352	0.090273	0.56915	0.092591	0.096277	0.090233	0.1012	0.11424	0.13315	0.11376	0.12295	0.15881	0.21181	0.16286	0.092605	0.093382	0.09425	0.094192
855	0.66726	0.55696	0.48416	0.59241	0.62062	0.56732	0.48603	0.72131	0.70573	0.39231	0.757	0.68201	0.75865	0.25107	0.21121	0.15025	0.27475	0.077941	0.37184	0.32769	0.19842	0.1857	0.17617	0.37134	0.38252	0.4019	0.14094	0.085216	0.14993	0.17679	0.19846	0.095579	0.092363	0.51507	0.094185	0.093719	0.090723	0.10333	0.11675	0.13616	0.11623	0.1256	0.16301	0.17407	0.16741	0.094818	0.095609	0.096484	0.09641
856	0.62024	0.5065	0.43726	0.54328	0.57032	0.51509	0.43365	0.71056	0.71185	0.34264	0.73453	0.70192	0.7416	0.20601	0.17276	0.13329	0.23394	0.075149	0.3191	0.27848	0.16269	0.15239	0.14497	0.31845	0.32909	0.34696	0.14421	0.087333	0.15351	0.18226	0.1623	0.097828	0.094497	0.46063	0.095946	0.092402	0.091671	0.10551	0.11929	0.13927	0.11874	0.12832	0.1675	0.14349	0.17228	0.097051	0.097859	0.098742	0.098649
857	0.56943	0.45493	0.38979	0.4922	0.51769	0.46188	0.38142	0.68809	0.70323	0.29461	0.70039	0.70749	0.71137	0.16793	0.14193	0.12058	0.19762	0.073798	0.26902	0.2331	0.13443	0.12667	0.12122	0.26829	0.27812	0.29424	0.14761	0.089483	0.15726	0.18825	0.13384	0.1001	0.096668	0.40644	0.097832	0.091992	0.092952	0.10774	0.1219	0.1425	0.12131	0.1311	0.17233	0.12025	0.17752	0.099305	0.10013	0.10102	0.10091
858	0.51645	0.40307	0.34261	0.44016	0.46387	0.40851	0.33022	0.65679	0.68207	0.24952	0.65857	0.69892	0.67219	0.13787	0.11883	0.11141	0.16694	0.073466	0.22309	0.19317	0.11351	0.108	0.10417	0.22239	0.23107	0.24516	0.15117	0.09166	0.16122	0.1949	0.11287	0.1024	0.098871	0.35317	0.099812	0.09224	0.094473	0.11001	0.12456	0.14586	0.12393	0.13397	0.17757	0.10358	0.18323	0.10158	0.10243	0.10333	0.10319
859	0.46236	0.35177	0.29674	0.38803	0.40979	0.35578	0.2812	0.61924	0.65139	0.20888	0.61189	0.67834	0.62727	0.11565	0.10244	0.10503	0.14246	0.073861	0.18305	0.16004	0.098787	0.095069	0.092458	0.18249	0.18967	0.20146	0.15489	0.09386	0.16542	0.20238	0.098175	0.10472	0.1011	0.3017	0.10186	0.092972	0.096169	0.11232	0.12728	0.14936	0.12661	0.13692	0.18329	0.092137	0.18949	0.10388	0.10475	0.10566	0.1055
860	0.40807	0.30204	0.25343	0.33673	0.35637	0.3047	0.23582	0.57741	0.61391	0.17414	0.56226	0.64852	0.57878	0.10008	0.091295	0.10078	0.12399	0.074775	0.15029	0.13429	0.088827	0.086433	0.084699	0.14994	0.15545	0.16478	0.15881	0.096082	0.16989	0.21094	0.088274	0.10707	0.10336	0.25327	0.10398	0.094061	0.097996	0.11467	0.13008	0.15303	0.12936	0.13996	0.18963	0.084559	0.19644	0.10621	0.1071	0.10803	0.10783
861	0.35447	0.25521	0.21412	0.28743	0.30472	0.25662	0.19572	0.53271	0.57171	0.14621	0.5109	0.61199	0.52814	0.089572	0.083982	0.098168	0.11069	0.076061	0.12521	0.1154	0.082347	0.080909	0.079798	0.1251	0.129	0.13602	0.16296	0.098326	0.17469	0.22097	0.081854	0.10945	0.10565	0.2095	0.10614	0.095419	0.099923	0.11706	0.13295	0.1569	0.13219	0.14312	0.19672	0.079782	0.20427	0.10857	0.10949	0.11042	0.1102
862	0.30269	0.21286	0.18017	0.24161	0.25627	0.21316	0.16231	0.48617	0.52635	0.12505	0.45869	0.57076	0.47634	0.082758	0.079426	0.096778	0.1015	0.07761	0.1071	0.10219	0.078369	0.077613	0.07694	0.10721	0.10975	0.11483	0.16737	0.10059	0.17989	0.23299	0.077928	0.11187	0.10797	0.17204	0.10834	0.096978	0.10193	0.11949	0.13592	0.16099	0.13509	0.1464	0.20479	0.077009	0.21324	0.11095	0.11191	0.11286	0.11259
863	0.25416	0.17656	0.15251	0.2009	0.2127	0.17596	0.13618	0.43858	0.47897	0.10983	0.40635	0.52633	0.42414	0.078569	0.076825	0.096306	0.095441	0.079346	0.094604	0.093319	0.07617	0.075901	0.075537	0.094879	0.096392	0.10001	0.1721	0.10289	0.18559	0.2478	0.07577	0.11432	0.11032	0.142	0.11059	0.098693	0.104	0.12197	0.13898	0.16533	0.13809	0.14982	0.21413	0.075664	0.2237	0.11338	0.11436	0.11533	0.11503
864	0.21059	0.14732	0.13125	0.16675	0.17563	0.14608	0.11692	0.39063	0.43047	0.099347	0.35462	0.47983	0.37227	0.076237	0.075611	0.096519	0.091679	0.081214	0.086307	0.087626	0.075236	0.075314	0.075169	0.086713	0.087478	0.090042	0.17722	0.1052	0.19193	0.26652	0.074869	0.11682	0.11271	0.11942	0.11288	0.10053	0.10612	0.1245	0.14215	0.16999	0.14119	0.15339	0.22515	0.075337	0.23618	0.11584	0.11686	0.11784	0.1175
865	0.17361	0.1252	0.11573	0.13987	0.14604	0.12355	0.1034	0.34305	0.38168	0.092424	0.30443	0.43214	0.32155	0.075218	0.075382	0.097244	0.08959	0.083177	0.081043	0.084211	0.075205	0.075528	0.075538	0.081546	0.081779	0.083605	0.1828	0.10755	0.19906	0.29069	0.074862	0.11937	0.11513	0.10334	0.11521	0.10246	0.10829	0.12708	0.14545	0.17501	0.1444	0.15716	0.23847	0.075735	0.25141	0.11834	0.11941	0.12041	0.12002
866	0.1442	0.10934	0.10491	0.11996	0.12388	0.10746	0.094282	0.29674	0.33347	0.088097	0.25701	0.38405	0.27313	0.07513	0.075853	0.098351	0.088707	0.085208	0.077939	0.082417	0.075815	0.076314	0.076434	0.078514	0.078368	0.079682	0.18895	0.10993	0.20724	0.32245	0.07549	0.12196	0.1176	0.092366	0.11757	0.10447	0.1105	0.12971	0.1489	0.18048	0.14775	0.16115	0.25492	0.076651	0.27045	0.1209	0.12201	0.12303	0.12258
867	0.12225	0.098455	0.09769	0.10593	0.10815	0.096456	0.088406	0.25291	0.28691	0.085636	0.21394	0.33642	0.22846	0.075703	0.076821	0.099745	0.088691	0.08729	0.076366	0.081773	0.076882	0.077505	0.077704	0.076994	0.076581	0.077538	0.19584	0.11234	0.21676	0.36462	0.076571	0.12461	0.12011	0.08517	0.11999	0.10655	0.11276	0.13241	0.1525	0.18651	0.15125	0.16539	0.27573	0.077935	0.29479	0.1235	0.12466	0.1257	0.1252
868	0.10672	0.091295	0.093127	0.09646	0.097453	0.089235	0.084858	0.21297	0.24335	0.084509	0.17682	0.29026	0.18918	0.076745	0.078143	0.10136	0.089298	0.089409	0.075882	0.081947	0.078275	0.078984	0.07924	0.076549	0.075945	0.076653	0.20365	0.11479	0.22806	0.42055	0.077972	0.12732	0.12266	0.080688	0.12244	0.10869	0.11506	0.13518	0.1563	0.19321	0.15492	0.16994	0.30264	0.079481	0.32664	0.12616	0.12738	0.12844	0.12787
869	0.096183	0.086831	0.09049	0.09034	0.090476	0.084738	0.082968	0.17838	0.20432	0.084332	0.1468	0.24689	0.15667	0.078119	0.079714	0.10313	0.090352	0.091559	0.076171	0.082701	0.079898	0.080669	0.080965	0.076865	0.076127	0.076659	0.21266	0.11728	0.24172	0.49342	0.079601	0.1301	0.12527	0.078136	0.12495	0.11089	0.1174	0.13802	0.16032	0.20076	0.15879	0.17486	0.338	0.081213	0.36909	0.12888	0.13016	0.13125	0.1306
870	0.089331	0.084294	0.089235	0.08663	0.086171	0.082182	0.082258	0.15015	0.17121	0.084834	0.12401	0.20779	0.13145	0.079728	0.081463	0.10504	0.091729	0.093734	0.07701	0.083868	0.081685	0.082498	0.082824	0.077724	0.076891	0.077298	0.22323	0.11982	0.25853	0.58379	0.081392	0.13295	0.12794	0.076957	0.12751	0.11313	0.11979	0.14094	0.1646	0.20936	0.1629	0.18021	0.38495	0.083078	0.42624	0.13167	0.13301	0.13413	0.13341
871	0.085117	0.083125	0.088968	0.084635	0.083762	0.081003	0.082384	0.12848	0.14479	0.085818	0.10765	0.17437	0.113	0.081504	0.083338	0.10705	0.093338	0.095933	0.07824	0.085328	0.08359	0.084432	0.08478	0.078967	0.078068	0.078386	0.2359	0.12241	0.27962	0.68492	0.083297	0.13589	0.13067	0.076751	0.13013	0.11542	0.12223	0.14395	0.16918	0.2193	0.16728	0.18608	0.44714	0.085038	0.50252	0.13453	0.13595	0.1371	0.13628
872	0.082772	0.082928	0.089405	0.083854	0.082692	0.080799	0.083104	0.11272	0.12494	0.087147	0.096421	0.14748	0.10015	0.083397	0.085303	0.10915	0.095117	0.098153	0.079747	0.086997	0.085578	0.086441	0.086806	0.080482	0.079537	0.079791	0.25143	0.12505	0.3065	0.77855	0.085285	0.13891	0.13348	0.077237	0.1328	0.11776	0.12471	0.14706	0.17412	0.23092	0.17197	0.19257	0.52754	0.087068	0.59981	0.13747	0.13897	0.14016	0.13924
873	0.081749	0.08342	0.090345	0.083933	0.08257	0.081288	0.084247	0.10177	0.11078	0.088722	0.089017	0.12712	0.091543	0.085375	0.087333	0.11131	0.097022	0.1004	0.08145	0.088816	0.087628	0.088504	0.088884	0.082191	0.081213	0.08142	0.27092	0.12775	0.34118	0.84097	0.087333	0.14203	0.13636	0.078215	0.13555	0.12016	0.12724	0.15028	0.17948	0.2447	0.17704	0.1998	0.62514	0.08915	0.71075	0.1405	0.1421	0.14332	0.14229
874	0.081661	0.084402	0.091644	0.084624	0.083119	0.082268	0.085689	0.094481	0.1011	0.090474	0.084381	0.11248	0.086045	0.087414	0.089411	0.11354	0.099021	0.10266	0.083294	0.090744	0.089724	0.09061	0.091001	0.084037	0.083038	0.083209	0.29598	0.13052	0.38603	0.86084	0.089425	0.14525	0.13933	0.079542	0.13836	0.1226	0.12983	0.15363	0.18534	0.26126	0.18255	0.20793	0.72892	0.09127	0.81193	0.14363	0.14533	0.1466	0.14544
875	0.082234	0.085732	0.0932	0.085747	0.084142	0.083597	0.087346	0.089888	0.094793	0.092355	0.081722	0.10242	0.082773	0.089497	0.091526	0.11583	0.10109	0.10495	0.085237	0.092752	0.091856	0.092748	0.09315	0.085981	0.084967	0.085111	0.32893	0.13336	0.44341	0.846	0.091552	0.1486	0.14239	0.081118	0.14126	0.12509	0.13248	0.15711	0.1918	0.28148	0.18859	0.21716	0.81564	0.093423	0.87384	0.14687	0.14868	0.14999	0.14871
876	0.083275	0.087309	0.094943	0.087177	0.0855	0.085173	0.089157	0.08724	0.090928	0.094331	0.080468	0.095813	0.081083	0.091615	0.09367	0.11816	0.10323	0.10726	0.087252	0.094821	0.094018	0.094914	0.095326	0.087997	0.086972	0.087095	0.37303	0.13627	0.51451	0.81012	0.093707	0.15208	0.14556	0.082869	0.14424	0.12763	0.13519	0.16074	0.19901	0.30655	0.19527	0.22775	0.86282	0.095604	0.8869	0.15023	0.15217	0.15353	0.15209
877	0.084647	0.089063	0.096821	0.088825	0.087096	0.086927	0.091078	0.085981	0.088812	0.096378	0.080209	0.091727	0.080515	0.093761	0.09584	0.12055	0.10541	0.10961	0.089321	0.096936	0.096205	0.097104	0.097527	0.090065	0.089034	0.089137	0.43255	0.13928	0.59731	0.76292	0.095886	0.15571	0.14884	0.084746	0.14731	0.13023	0.13797	0.16455	0.20712	0.33807	0.20273	0.24001	0.86682	0.097809	0.86453	0.15372	0.15581	0.15723	0.15561
878	0.086254	0.090945	0.0988	0.090629	0.088862	0.088806	0.093081	0.085715	0.087942	0.098481	0.080658	0.089451	0.080745	0.095931	0.098032	0.12299	0.10763	0.11198	0.091431	0.099091	0.098415	0.099317	0.09975	0.092173	0.091137	0.091224	0.51207	0.14237	0.68385	0.70995	0.098088	0.15951	0.15226	0.086712	0.15049	0.1329	0.14082	0.16855	0.21638	0.37814	0.21116	0.25436	0.8404	0.10004	0.82324	0.15737	0.15961	0.1611	0.15928
879	0.088028	0.092919	0.10086	0.092547	0.090749	0.090778	0.095145	0.086154	0.087956	0.10063	0.081608	0.088464	0.081539	0.098122	0.10025	0.12548	0.10989	0.11439	0.093572	0.10128	0.10065	0.10155	0.102	0.094313	0.093273	0.093345	0.61344	0.14558	0.75966	0.65432	0.10031	0.16349	0.15582	0.088744	0.15378	0.13562	0.14375	0.17278	0.22706	0.42924	0.2208	0.2713	0.79705	0.10229	0.77276	0.16118	0.1636	0.16516	0.16312
880	0.089921	0.094963	0.10297	0.094548	0.092725	0.092817	0.097257	0.087094	0.088597	0.10281	0.082914	0.088394	0.082734	0.10033	0.10248	0.12802	0.1122	0.11684	0.095741	0.1035	0.10291	0.10381	0.10427	0.09648	0.095437	0.095494	0.72799	0.14889	0.80929	0.59768	0.10256	0.16769	0.15956	0.090825	0.15719	0.13842	0.14677	0.17726	0.23956	0.49371	0.23195	0.29144	0.74481	0.10457	0.71796	0.16518	0.16781	0.16945	0.16715
881	0.091902	0.097061	0.10514	0.096611	0.094765	0.094909	0.099408	0.088393	0.089683	0.10503	0.084472	0.088976	0.084214	0.10257	0.10474	0.13062	0.11453	0.11933	0.097934	0.10574	0.10519	0.10609	0.10656	0.098671	0.097626	0.097668	0.82922	0.15234	0.82625	0.54091	0.10483	0.17212	0.16348	0.092944	0.16075	0.14128	0.14988	0.18205	0.25439	0.57208	0.24503	0.31551	0.68814	0.10687	0.66145	0.16939	0.17226	0.17399	0.1714
882	0.093946	0.099201	0.10734	0.098723	0.096856	0.097041	0.10159	0.089947	0.091085	0.10729	0.086211	0.09002	0.085896	0.10482	0.10702	0.13328	0.11691	0.12186	0.10015	0.10802	0.1075	0.1084	0.10889	0.10089	0.099837	0.099863	0.88603	0.15593	0.81507	0.48452	0.10712	0.17683	0.16763	0.095094	0.16446	0.14423	0.1531	0.18717	0.27223	0.65977	0.26056	0.34431	0.62944	0.1092	0.60452	0.17385	0.17698	0.17882	0.17589
883	0.09604	0.10138	0.10959	0.10088	0.098987	0.099208	0.10381	0.091684	0.092714	0.10957	0.088077	0.091392	0.087723	0.1071	0.10933	0.13599	0.11933	0.12444	0.10239	0.11032	0.10983	0.11074	0.11124	0.10312	0.10207	0.10208	0.89151	0.15967	0.78459	0.42886	0.10944	0.18186	0.17202	0.09727	0.16835	0.14727	0.15643	0.19271	0.294	0.7436	0.27925	0.37869	0.56999	0.11156	0.54782	0.17858	0.18202	0.18399	0.18067
884	0.098172	0.10358	0.11187	0.10306	0.10115	0.1014	0.10605	0.093554	0.094505	0.11188	0.090037	0.093	0.089653	0.1094	0.11167	0.13878	0.12178	0.12707	0.10465	0.11265	0.1122	0.11311	0.11363	0.10538	0.10433	0.10432	0.86227	0.1636	0.74222	0.37434	0.11179	0.18726	0.17671	0.09947	0.17244	0.1504	0.15989	0.19873	0.3209	0.8047	0.30204	0.41936	0.51052	0.11396	0.49166	0.18364	0.18744	0.18954	0.18579
885	0.10034	0.10582	0.11419	0.10528	0.10334	0.10363	0.10832	0.095521	0.096414	0.11423	0.092065	0.094777	0.09166	0.11173	0.11403	0.14163	0.12428	0.12976	0.10694	0.11502	0.1146	0.11551	0.11605	0.10767	0.10661	0.10658	0.81535	0.16773	0.69289	0.32156	0.11417	0.19308	0.18174	0.10169	0.17676	0.15363	0.16348	0.20531	0.35453	0.83055	0.33018	0.46666	0.45155	0.11639	0.43626	0.18907	0.19328	0.19555	0.19128
886	0.10253	0.10809	0.11654	0.10752	0.10556	0.10588	0.11062	0.097562	0.09841	0.11661	0.094144	0.096677	0.093723	0.11409	0.11643	0.14456	0.12683	0.13251	0.10925	0.11742	0.11704	0.11795	0.11851	0.10998	0.10892	0.10887	0.75992	0.17208	0.6396	0.27151	0.11658	0.19941	0.18717	0.10394	0.18134	0.15698	0.16724	0.21259	0.39684	0.82324	0.36527	0.52005	0.39356	0.11886	0.38188	0.19494	0.19964	0.2021	0.19723
887	0.10475	0.11039	0.11893	0.1098	0.10781	0.10816	0.11295	0.099659	0.10047	0.11903	0.096264	0.098668	0.09583	0.11649	0.11887	0.14758	0.12943	0.13533	0.11159	0.11986	0.11951	0.12043	0.12101	0.11232	0.11125	0.11118	0.70065	0.17669	0.5842	0.22556	0.11904	0.20635	0.19309	0.10621	0.18622	0.16046	0.17117	0.2207	0.44997	0.79294	0.40922	0.57751	0.33723	0.12137	0.32902	0.20134	0.2066	0.2093	0.20373
888	0.107	0.11271	0.12136	0.1121	0.11008	0.11046	0.11531	0.1018	0.10259	0.12149	0.098417	0.10073	0.097973	0.11891	0.12134	0.15068	0.13208	0.13823	0.11397	0.12234	0.12203	0.12295	0.12355	0.11469	0.11362	0.11352	0.6398	0.18159	0.52777	0.18531	0.12153	0.21401	0.19959	0.10851	0.19146	0.16408	0.17531	0.22985	0.51553	0.74946	0.46403	0.63492	0.28362	0.12393	0.27853	0.20835	0.21429	0.21729	0.21087
889	0.10927	0.11507	0.12383	0.11444	0.11239	0.1128	0.11771	0.10398	0.10475	0.12399	0.1006	0.10284	0.10015	0.12138	0.12386	0.15389	0.13479	0.1412	0.11637	0.12486	0.1246	0.12552	0.12615	0.11709	0.11602	0.11589	0.57853	0.18683	0.47104	0.15213	0.12407	0.22256	0.2068	0.11083	0.19711	0.16785	0.17967	0.24028	0.59288	0.69893	0.53088	0.68616	0.23421	0.12654	0.23175	0.21612	0.22288	0.22623	0.21881
890	0.11157	0.11746	0.12634	0.1168	0.11472	0.11517	0.12014	0.1062	0.10694	0.12654	0.10281	0.105	0.10235	0.12389	0.12642	0.1572	0.13756	0.14427	0.11882	0.12743	0.12721	0.12813	0.1288	0.11953	0.11845	0.1183	0.51749	0.19247	0.41463	0.12646	0.12665	0.23221	0.21491	0.11318	0.20326	0.1718	0.1843	0.25232	0.676	0.64469	0.60805	0.72451	0.19081	0.12921	0.19034	0.22483	0.23258	0.23636	0.22774
891	0.1139	0.11989	0.1289	0.1192	0.11708	0.11757	0.12261	0.10845	0.10917	0.12913	0.10504	0.1072	0.10457	0.12644	0.12904	0.16063	0.1404	0.14743	0.1213	0.13004	0.12989	0.13081	0.1315	0.12201	0.12093	0.12074	0.45713	0.19856	0.35925	0.1077	0.12929	0.24323	0.22412	0.11557	0.21001	0.17595	0.18923	0.26637	0.75155	0.5888	0.68805	0.74535	0.155	0.13193	0.1558	0.23469	0.24366	0.24801	0.23793
892	0.11626	0.12236	0.13151	0.12164	0.11947	0.12001	0.12513	0.11073	0.11143	0.13178	0.1073	0.10943	0.10682	0.12904	0.1317	0.1642	0.14332	0.15071	0.12382	0.13272	0.13262	0.13354	0.13427	0.12454	0.12344	0.12322	0.39787	0.2052	0.30586	0.094567	0.13199	0.25601	0.23472	0.11799	0.21749	0.18032	0.19452	0.28292	0.80318	0.53246	0.75675	0.74776	0.1274	0.13472	0.12882	0.24603	0.25651	0.26159	0.24971
893	0.11866	0.12486	0.13417	0.12412	0.1219	0.12248	0.12769	0.11304	0.11372	0.13448	0.10958	0.11169	0.1091	0.13169	0.13443	0.1679	0.14632	0.1541	0.1264	0.13545	0.13542	0.13634	0.13711	0.12711	0.12601	0.12574	0.34038	0.21248	0.25578	0.085698	0.13474	0.27107	0.24709	0.12045	0.22583	0.18495	0.20023	0.30251	0.82205	0.4764	0.7995	0.73403	0.10738	0.13758	0.10895	0.25927	0.27166	0.27771	0.26362
894	0.12109	0.12742	0.13689	0.12664	0.12437	0.125	0.1303	0.11538	0.11604	0.13725	0.1119	0.11399	0.11141	0.1344	0.13722	0.17178	0.14941	0.15762	0.12902	0.13825	0.13829	0.13921	0.14003	0.12973	0.12862	0.12831	0.28568	0.22053	0.21067	0.07994	0.13757	0.28915	0.26169	0.12294	0.23523	0.18987	0.20643	0.32567	0.81122	0.42115	0.81038	0.70776	0.093529	0.14052	0.094991	0.27503	0.28985	0.29721	0.28035
895	0.12355	0.13002	0.13967	0.1292	0.12687	0.12757	0.13296	0.11775	0.11839	0.14008	0.11424	0.11631	0.11374	0.13718	0.14008	0.17583	0.15259	0.16129	0.1317	0.14112	0.14124	0.14216	0.14302	0.1324	0.13128	0.13093	0.23529	0.22953	0.17219	0.076423	0.14047	0.31129	0.27911	0.12549	0.24588	0.19514	0.21321	0.35289	0.77997	0.36724	0.79423	0.67246	0.084283	0.14355	0.085533	0.29418	0.31215	0.32131	0.30099
896	0.12606	0.13268	0.14252	0.13182	0.12943	0.13019	0.13568	0.12016	0.12078	0.14299	0.11661	0.11867	0.11611	0.14002	0.14302	0.18008	0.15589	0.16512	0.13444	0.14407	0.14427	0.14519	0.14611	0.13513	0.13401	0.1336	0.19104	0.23968	0.14143	0.074515	0.14344	0.33904	0.30006	0.12808	0.25804	0.2008	0.22068	0.38449	0.73666	0.31533	0.76006	0.63098	0.078347	0.14666	0.079364	0.31799	0.34008	0.35176	0.3271
897	0.12861	0.13539	0.14544	0.13448	0.13203	0.13286	0.13847	0.12261	0.1232	0.14598	0.11902	0.12107	0.1185	0.14293	0.14604	0.18457	0.1593	0.16913	0.13725	0.1471	0.1474	0.14832	0.1493	0.13793	0.1368	0.13633	0.15457	0.25129	0.11836	0.073763	0.14651	0.37458	0.32544	0.13072	0.27201	0.20692	0.22897	0.42054	0.68655	0.26639	0.71527	0.58539	0.07476	0.14988	0.075562	0.34835	0.37587	0.39106	0.36099
898	0.13121	0.13817	0.14845	0.13721	0.13468	0.13559	0.14132	0.1251	0.12566	0.14906	0.12146	0.1235	0.12094	0.14593	0.14915	0.18931	0.16284	0.17335	0.14013	0.15023	0.15063	0.15155	0.15259	0.1408	0.13966	0.13913	0.12655	0.26472	0.10197	0.073843	0.14967	0.42101	0.35636	0.13342	0.28815	0.21358	0.23824	0.46075	0.63274	0.22175	0.66448	0.53721	0.072835	0.15321	0.073455	0.38798	0.42261	0.44253	0.406
899	0.13387	0.14102	0.15154	0.14	0.13739	0.13838	0.14425	0.12763	0.12817	0.15223	0.12395	0.12597	0.12341	0.14901	0.15236	0.19436	0.16653	0.17779	0.14308	0.15346	0.15397	0.15489	0.156	0.14374	0.14259	0.14199	0.10633	0.28051	0.090774	0.074523	0.15294	0.48236	0.39411	0.13618	0.30691	0.22088	0.24871	0.50428	0.57698	0.1829	0.61031	0.48746	0.0721	0.15666	0.072572	0.44074	0.48434	0.51007	0.46649
900	0.13657	0.14393	0.15473	0.14286	0.14016	0.14125	0.14726	0.13021	0.13071	0.15551	0.12647	0.12848	0.12592	0.15219	0.15568	0.19974	0.17038	0.18249	0.14612	0.1568	0.15743	0.15835	0.15954	0.14677	0.14561	0.14493	0.092377	0.29937	0.0834	0.075634	0.15632	0.56258	0.44003	0.13901	0.32885	0.22895	0.26063	0.54952	0.52044	0.15104	0.55445	0.43698	0.072212	0.16025	0.072566	0.51128	0.56494	0.59617	0.54669
901	0.13934	0.14693	0.15802	0.14579	0.14299	0.14418	0.15037	0.13284	0.1333	0.15891	0.12905	0.13103	0.12848	0.15547	0.15912	0.20552	0.17442	0.18749	0.14925	0.16026	0.16103	0.16195	0.16323	0.14988	0.14872	0.14795	0.083095	0.3223	0.07878	0.077056	0.15983	0.66163	0.49504	0.14191	0.35463	0.23794	0.27436	0.59387	0.46383	0.12646	0.49794	0.38652	0.072929	0.16399	0.073192	0.60282	0.66419	0.69686	0.64658
902	0.14218	0.15002	0.16142	0.1488	0.1459	0.14721	0.15356	0.13552	0.13594	0.16243	0.13167	0.13363	0.13109	0.15887	0.16269	0.21176	0.17866	0.19282	0.15248	0.16386	0.16479	0.1657	0.16708	0.1531	0.15192	0.15106	0.07715	0.35071	0.076121	0.0787	0.16348	0.76777	0.55862	0.14489	0.38496	0.24808	0.29035	0.63389	0.40777	0.10853	0.44152	0.33689	0.074077	0.16789	0.074271	0.71075	0.77001	0.79527	0.75399
903	0.14509	0.1532	0.16496	0.1519	0.14888	0.15032	0.15687	0.13826	0.13864	0.1661	0.13434	0.13629	0.13375	0.16239	0.1664	0.21854	0.18313	0.19855	0.15583	0.16762	0.16871	0.16961	0.17111	0.15642	0.15524	0.15426	0.073564	0.38652	0.074857	0.080504	0.16728	0.85407	0.62723	0.14796	0.4205	0.25962	0.30915	0.66582	0.35293	0.095989	0.38588	0.28909	0.075532	0.17198	0.075676	0.81415	0.85537	0.86473	0.84161
904	0.14807	0.15649	0.16863	0.15509	0.15195	0.15353	0.16029	0.14106	0.14139	0.16993	0.13708	0.13899	0.13647	0.16606	0.17028	0.22598	0.18788	0.20473	0.15929	0.17155	0.17281	0.17371	0.17533	0.15987	0.15867	0.15757	0.071651	0.43234	0.07459	0.082423	0.17126	0.89499	0.69291	0.15111	0.46159	0.27292	0.33146	0.68655	0.30023	0.087528	0.3318	0.2444	0.077206	0.17628	0.077314	0.88141	0.89519	0.88853	0.88381
905	0.15114	0.1599	0.17246	0.15839	0.15511	0.15685	0.16385	0.14393	0.1442	0.17394	0.13987	0.14176	0.13924	0.16988	0.17434	0.23421	0.19293	0.21144	0.16289	0.17568	0.17713	0.17802	0.17978	0.16344	0.16223	0.161	0.070925	0.49131	0.075032	0.084427	0.17543	0.88955	0.74459	0.15438	0.5078	0.28842	0.35806	0.69448	0.25095	0.082048	0.28039	0.2043	0.079036	0.18081	0.079119	0.89725	0.889	0.87312	0.87941
906	0.15431	0.16343	0.17646	0.16181	0.15837	0.16029	0.16755	0.14688	0.14708	0.17815	0.14274	0.14459	0.14209	0.17387	0.1786	0.24338	0.19834	0.21877	0.16664	0.18002	0.18168	0.18256	0.18449	0.16716	0.16594	0.16455	0.071046	0.56616	0.075983	0.086494	0.17982	0.85505	0.77318	0.15775	0.5574	0.30668	0.38979	0.68977	0.20673	0.078716	0.23307	0.17015	0.080976	0.1856	0.081045	0.87359	0.85418	0.83479	0.84538
907	0.15757	0.1671	0.18066	0.16535	0.16174	0.16385	0.17141	0.1499	0.15003	0.18259	0.14567	0.14749	0.14501	0.17805	0.18308	0.25372	0.20417	0.22686	0.17055	0.18463	0.1865	0.18737	0.18948	0.17103	0.16981	0.16825	0.071772	0.65601	0.077295	0.088609	0.18445	0.80647	0.77637	0.16125	0.60683	0.32838	0.42729	0.67386	0.16918	0.076926	0.19152	0.14276	0.082997	0.19069	0.083058	0.82933	0.80549	0.78508	0.79674
908	0.16095	0.17094	0.18509	0.16903	0.16523	0.16757	0.17545	0.15301	0.15306	0.1873	0.14869	0.15046	0.148	0.18245	0.18783	0.26548	0.2105	0.23584	0.17464	0.18952	0.19162	0.19248	0.1948	0.17509	0.17385	0.1721	0.07293	0.75093	0.078864	0.090762	0.18936	0.75118	0.75834	0.16488	0.65092	0.35429	0.47074	0.64884	0.13929	0.076244	0.15713	0.12203	0.085076	0.19613	0.085136	0.77559	0.75018	0.72974	0.74101
909	0.16445	0.17495	0.18977	0.17288	0.16885	0.17145	0.1797	0.15621	0.15618	0.19231	0.1518	0.1535	0.15108	0.18709	0.19286	0.27899	0.21742	0.24592	0.17894	0.19476	0.19709	0.19793	0.20049	0.17934	0.17809	0.17612	0.074393	0.83053	0.080616	0.092948	0.19458	0.69298	0.72537	0.16867	0.68415	0.38524	0.51935	0.61684	0.11702	0.076353	0.13052	0.10715	0.087198	0.20196	0.087263	0.71758	0.692	0.67201	0.68207
910	0.16808	0.17915	0.19474	0.17689	0.17262	0.17551	0.18418	0.15951	0.15938	0.19767	0.15499	0.15664	0.15425	0.19201	0.19822	0.29465	0.22505	0.25736	0.18347	0.20039	0.20295	0.20378	0.20662	0.18382	0.18255	0.18034	0.076074	0.8729	0.0825	0.095162	0.20017	0.63362	0.68309	0.17261	0.70247	0.42193	0.57067	0.57977	0.10125	0.077037	0.11111	0.096892	0.089355	0.20824	0.08943	0.65751	0.63269	0.61337	0.62172
911	0.17186	0.18359	0.20004	0.18111	0.17656	0.17978	0.18892	0.16293	0.16268	0.20344	0.1583	0.15987	0.15752	0.19725	0.20397	0.31293	0.23353	0.27048	0.18826	0.20649	0.20927	0.21009	0.21325	0.18854	0.18726	0.18478	0.077911	0.87377	0.084479	0.097404	0.20617	0.57417	0.6351	0.17675	0.7049	0.46464	0.62033	0.53917	0.090514	0.078139	0.097574	0.090102	0.09154	0.21505	0.091629	0.59692	0.57331	0.55473	0.56108
912	0.17581	0.18828	0.20573	0.18555	0.18068	0.18427	0.19397	0.16646	0.16609	0.20969	0.16171	0.16319	0.1609	0.20284	0.21017	0.33436	0.24305	0.28574	0.19334	0.21315	0.21613	0.21694	0.22047	0.19355	0.19225	0.18946	0.079858	0.84539	0.086526	0.099673	0.21267	0.5152	0.58376	0.18109	0.69308	0.51271	0.66259	0.49622	0.083485	0.079541	0.0885	0.085853	0.093751	0.22248	0.093858	0.53658	0.51442	0.49656	0.5008
913	0.17995	0.19326	0.21188	0.19024	0.18501	0.18903	0.19937	0.17012	0.16961	0.21652	0.16525	0.16663	0.1644	0.20885	0.21688	0.35949	0.25381	0.30373	0.19875	0.22048	0.22361	0.22441	0.22839	0.19888	0.19757	0.19441	0.081884	0.80129	0.088626	0.10197	0.21973	0.45703	0.53061	0.18566	0.66997	0.56393	0.69201	0.45187	0.07911	0.081162	0.082659	0.083436	0.095985	0.23065	0.096114	0.47691	0.45632	0.43919	0.44129
914	0.1843	0.19858	0.21856	0.19522	0.18958	0.1941	0.20518	0.17393	0.17326	0.22402	0.16892	0.17018	0.16803	0.21535	0.2242	0.38881	0.26609	0.32526	0.20455	0.22861	0.23184	0.23264	0.23715	0.20459	0.20325	0.19968	0.083967	0.74928	0.090766	0.1043	0.22746	0.39994	0.47667	0.1905	0.63857	0.61412	0.70539	0.40692	0.076625	0.082944	0.079128	0.082333	0.098244	0.23969	0.098398	0.41824	0.39931	0.38295	0.38302
915	0.18888	0.20428	0.22587	0.20054	0.19441	0.19951	0.21147	0.1779	0.17705	0.23234	0.17274	0.17386	0.1718	0.22242	0.23225	0.42255	0.28021	0.35144	0.21079	0.23772	0.24096	0.24177	0.2469	0.21072	0.20936	0.20531	0.086093	0.69337	0.09294	0.10665	0.236	0.34443	0.42272	0.19562	0.60135	0.65748	0.70273	0.3621	0.075488	0.084843	0.077245	0.082172	0.10053	0.24979	0.10071	0.36105	0.34387	0.32841	0.32668
916	0.19373	0.21045	0.23393	0.20624	0.19955	0.20532	0.21833	0.18204	0.18099	0.24164	0.17673	0.17769	0.17574	0.23017	0.24118	0.4605	0.29651	0.38373	0.21755	0.24803	0.25116	0.25199	0.25787	0.21734	0.21595	0.21136	0.088252	0.63585	0.095142	0.10905	0.24552	0.29128	0.36949	0.20109	0.56019	0.68829	0.68632	0.3182	0.07531	0.086831	0.076533	0.082685	0.10284	0.26118	0.10305	0.30609	0.2908	0.27649	0.27336
917	0.19889	0.21714	0.24287	0.21239	0.20504	0.2116	0.22586	0.18637	0.18509	0.25212	0.18089	0.18167	0.17985	0.23874	0.25116	0.5017	0.31543	0.42404	0.22492	0.25981	0.26268	0.26355	0.27033	0.22455	0.22313	0.2179	0.090438	0.57793	0.097371	0.11148	0.25621	0.24178	0.31785	0.20694	0.51643	0.703	0.65933	0.27614	0.075817	0.088887	0.076656	0.08368	0.10517	0.27415	0.10543	0.2546	0.24138	0.22862	0.22463
918	0.20441	0.22447	0.25287	0.21907	0.21095	0.21844	0.2342	0.19092	0.18938	0.26404	0.18526	0.18581	0.18415	0.2483	0.26246	0.54418	0.3374	0.47462	0.23299	0.27342	0.27581	0.27676	0.28466	0.23245	0.23098	0.225	0.092649	0.52024	0.099626	0.11395	0.26837	0.19765	0.26896	0.21323	0.47106	0.70138	0.62471	0.237	0.076813	0.090996	0.077376	0.08502	0.10754	0.28908	0.10784	0.20823	0.19732	0.18655	0.18233
919	0.21034	0.23255	0.26413	0.22637	0.21733	0.22594	0.24352	0.1957	0.19387	0.2777	0.18985	0.19015	0.18867	0.25907	0.27538	0.58496	0.36287	0.53749	0.24193	0.28928	0.29096	0.29206	0.30132	0.24117	0.23964	0.23278	0.094882	0.46318	0.10191	0.11646	0.28235	0.16055	0.22427	0.22004	0.42485	0.68565	0.5848	0.20198	0.078158	0.093148	0.07852	0.086607	0.10994	0.30649	0.11029	0.16879	0.16031	0.15183	0.14793
920	0.21675	0.24152	0.27689	0.23441	0.22429	0.23423	0.25403	0.20076	0.19859	0.29349	0.1947	0.19469	0.19343	0.27137	0.29035	0.62034	0.39221	0.61272	0.25189	0.30795	0.30866	0.30999	0.32094	0.25089	0.24927	0.24137	0.097137	0.40706	0.10422	0.11903	0.29863	0.13145	0.18535	0.22745	0.37853	0.65914	0.54133	0.1721	0.079751	0.095337	0.079966	0.088374	0.11238	0.32702	0.11278	0.13745	0.13128	0.12507	0.12183
921	0.22373	0.25158	0.29146	0.24333	0.23193	0.24347	0.266	0.20611	0.20355	0.31188	0.19983	0.19946	0.19847	0.28557	0.30794	0.64677	0.42565	0.69525	0.2631	0.33013	0.32959	0.33129	0.34434	0.26181	0.26008	0.25094	0.099416	0.35233	0.10655	0.12165	0.31785	0.11005	0.15343	0.23557	0.3329	0.62494	0.4956	0.14792	0.081522	0.09756	0.081628	0.090271	0.11487	0.35155	0.11532	0.11417	0.10993	0.10567	0.10317
922	0.23138	0.26295	0.30816	0.25332	0.24038	0.25388	0.27979	0.2118	0.2088	0.33342	0.20528	0.20449	0.20381	0.30221	0.3289	0.66179	0.46305	0.77207	0.27586	0.35664	0.35466	0.35694	0.3726	0.27422	0.27235	0.2617	0.10172	0.2997	0.10892	0.12433	0.34085	0.095089	0.12888	0.24453	0.28889	0.58552	0.44861	0.12938	0.083419	0.099814	0.083443	0.092264	0.11739	0.38117	0.11791	0.097796	0.095018	0.092239	0.090404
923	0.23984	0.27592	0.32738	0.2646	0.24983	0.26572	0.29582	0.21787	0.21435	0.35877	0.2111	0.2098	0.2095	0.32203	0.35425	0.66476	0.50371	0.82519	0.29054	0.38845	0.38506	0.38822	0.40709	0.2885	0.28641	0.27396	0.10405	0.25031	0.11133	0.12707	0.36878	0.08501	0.11102	0.25451	0.24769	0.54266	0.40118	0.1158	0.085408	0.1021	0.085369	0.09433	0.11997	0.41729	0.12056	0.086705	0.084968	0.083267	0.081956
924	0.24928	0.29085	0.3495	0.27744	0.2605	0.27934	0.31467	0.22437	0.22027	0.38861	0.21733	0.21544	0.21559	0.34601	0.38536	0.65661	0.54606	0.84404	0.30763	0.42653	0.42225	0.4267	0.44943	0.30511	0.30273	0.28807	0.10641	0.20578	0.11377	0.12989	0.4031	0.078471	0.098605	0.26572	0.21057	0.49768	0.35417	0.10626	0.087465	0.10442	0.087375	0.096453	0.12261	0.46147	0.12327	0.079459	0.07845	0.077513	0.076599
925	0.25992	0.30819	0.37489	0.29221	0.27268	0.29519	0.33706	0.23137	0.22659	0.42359	0.22405	0.22144	0.22214	0.3755	0.42393	0.63917	0.58758	0.83202	0.32779	0.47162	0.46789	0.47416	0.50124	0.32472	0.32192	0.30456	0.1088	0.16777	0.11626	0.13279	0.44561	0.074454	0.090303	0.27844	0.1787	0.45159	0.3085	0.099851	0.089572	0.10677	0.08944	0.098623	0.1253	0.51513	0.12606	0.07495	0.074447	0.07405	0.07343
926	0.27202	0.32848	0.40384	0.30933	0.28676	0.31386	0.36383	0.23895	0.23336	0.46408	0.23132	0.22784	0.22922	0.41226	0.4719	0.61453	0.62489	0.7993	0.35189	0.52362	0.52342	0.53201	0.56331	0.34818	0.34479	0.32411	0.11123	0.13743	0.11879	0.13578	0.49817	0.072226	0.084999	0.29301	0.15278	0.4052	0.2653	0.095777	0.09172	0.10915	0.091553	0.10083	0.12806	0.57861	0.12891	0.072379	0.072229	0.072216	0.07181
927	0.28596	0.35238	0.4364	0.32933	0.30324	0.33608	0.39596	0.24719	0.24067	0.5098	0.23925	0.23472	0.23691	0.45843	0.53087	0.58459	0.65441	0.75457	0.38104	0.58072	0.58897	0.59997	0.63394	0.37659	0.37239	0.34762	0.1137	0.11474	0.12137	0.13886	0.56188	0.071272	0.081844	0.30991	0.13279	0.3593	0.22584	0.093421	0.093901	0.11158	0.093704	0.10308	0.1309	0.6493	0.13186	0.071183	0.071282	0.071541	0.071293
928	0.30219	0.38061	0.4723	0.35284	0.32275	0.36277	0.43439	0.2562	0.24858	0.55925	0.24794	0.24214	0.24532	0.51604	0.60056	0.55094	0.6733	0.70332	0.41665	0.63837	0.66126	0.67369	0.70645	0.41136	0.40608	0.37633	0.11621	0.098645	0.124	0.14206	0.63512	0.071227	0.080224	0.32973	0.11809	0.31473	0.19139	0.092317	0.096113	0.11405	0.095887	0.10536	0.13383	0.71951	0.13489	0.070966	0.071242	0.071695	0.071561
929	0.32132	0.41396	0.51071	0.38058	0.34612	0.39501	0.47973	0.26612	0.2572	0.60923	0.25754	0.25017	0.25459	0.58566	0.67612	0.51478	0.68021	0.64872	0.46033	0.68927	0.73142	0.74274	0.76861	0.45411	0.44746	0.41179	0.11878	0.087686	0.1267	0.14538	0.71066	0.071831	0.079696	0.35326	0.10773	0.27248	0.16284	0.092122	0.098352	0.11657	0.0981	0.10768	0.13685	0.77681	0.13804	0.071448	0.07185	0.07244	0.072388
930	0.34412	0.45307	0.55009	0.41332	0.37438	0.43392	0.53162	0.27711	0.26666	0.65473	0.26822	0.25892	0.26487	0.66343	0.74602	0.47706	0.67546	0.59258	0.51355	0.72544	0.78611	0.79309	0.80753	0.50627	0.49811	0.45584	0.12139	0.080498	0.12946	0.14884	0.77486	0.072899	0.079947	0.3815	0.10071	0.23369	0.14044	0.092586	0.10062	0.11913	0.10034	0.11004	0.13997	0.80974	0.1413	0.072429	0.07292	0.073608	0.073614
931	0.37155	0.49812	0.58813	0.4517	0.40871	0.48039	0.5878	0.28936	0.27708	0.69005	0.28021	0.2685	0.27636	0.73819	0.79532	0.43853	0.66049	0.53593	0.57661	0.74179	0.81437	0.81517	0.81766	0.56817	0.5588	0.51015	0.12406	0.076009	0.1323	0.15246	0.81358	0.074297	0.080755	0.41568	0.096189	0.19949	0.12374	0.093527	0.10291	0.12176	0.10261	0.11243	0.14322	0.81483	0.14469	0.073765	0.07432	0.075077	0.075124
932	0.40476	0.54833	0.62192	0.49596	0.45026	0.53434	0.64339	0.30311	0.28866	0.71072	0.29379	0.27907	0.28932	0.79345	0.81475	0.39979	0.63724	0.47938	0.64684	0.73817	0.81443	0.80948	0.80286	0.63721	0.62784	0.57508	0.1268	0.073442	0.13522	0.15625	0.82147	0.07593	0.081959	0.45721	0.093504	0.17077	0.11181	0.094815	0.10524	0.12444	0.10491	0.11487	0.14661	0.79685	0.14823	0.075353	0.075954	0.07676	0.076834
933	0.44492	0.6011	0.64847	0.5453	0.49969	0.59369	0.69113	0.31868	0.30161	0.71524	0.3093	0.29079	0.30408	0.8176	0.80618	0.36142	0.60759	0.42338	0.71619	0.71809	0.79241	0.78324	0.77085	0.70574	0.6986	0.64734	0.12961	0.072245	0.13823	0.16025	0.80375	0.077729	0.083446	0.50733	0.092159	0.14786	0.10364	0.096359	0.1076	0.1272	0.10724	0.11735	0.15015	0.76323	0.15193	0.077121	0.077754	0.078595	0.078686
934	0.49288	0.65163	0.66543	0.59728	0.55623	0.65319	0.72384	0.3364	0.31621	0.7049	0.3272	0.30388	0.32104	0.81133	0.7774	0.32399	0.57322	0.36844	0.77199	0.68603	0.75583	0.74387	0.72822	0.76163	0.7591	0.71765	0.1325	0.072025	0.14134	0.16449	0.76888	0.079647	0.085137	0.56637	0.091787	0.13047	0.09828	0.09809	0.10999	0.13003	0.10961	0.11988	0.15388	0.72001	0.15583	0.079015	0.079673	0.080538	0.080639
935	0.54836	0.69348	0.67165	0.64719	0.61639	0.70467	0.73747	0.35673	0.3328	0.68254	0.34807	0.3186	0.34071	0.78297	0.736	0.28814	0.53543	0.31526	0.80293	0.64586	0.71053	0.69678	0.67947	0.79384	0.79687	0.77204	0.13548	0.072502	0.14457	0.169	0.72378	0.08165	0.086975	0.63221	0.09212	0.11781	0.094998	0.099963	0.11242	0.13294	0.11201	0.12246	0.15781	0.67126	0.15994	0.080999	0.081676	0.082559	0.082664
936	0.6086	0.72073	0.66726	0.68871	0.67309	0.73975	0.73249	0.38015	0.35177	0.65123	0.3726	0.33527	0.36375	0.74095	0.68722	0.25457	0.49526	0.26492	0.8062	0.60044	0.66027	0.64532	0.62736	0.79908	0.80673	0.79956	0.13856	0.073478	0.14792	0.17385	0.67288	0.083713	0.088919	0.69833	0.092966	0.10896	0.09323	0.10194	0.11489	0.13595	0.11446	0.12509	0.16199	0.61947	0.1643	0.083047	0.08374	0.084636	0.08474
937	0.66738	0.73033	0.65333	0.71596	0.71738	0.75379	0.71214	0.40723	0.37362	0.61359	0.40166	0.35427	0.39094	0.69111	0.63434	0.22397	0.45353	0.21894	0.78655	0.55173	0.60733	0.59156	0.57354	0.78142	0.79193	0.79856	0.14175	0.074809	0.15142	0.17907	0.61889	0.085822	0.090943	0.75412	0.094186	0.103	0.092555	0.10401	0.11741	0.13907	0.11694	0.1278	0.16645	0.56615	0.16896	0.085143	0.08585	0.086755	0.086855
938	0.71585	0.72276	0.63134	0.72566	0.74193	0.74717	0.68052	0.43851	0.3989	0.57164	0.43618	0.37604	0.42318	0.63704	0.57935	0.19701	0.41092	0.179	0.75137	0.50112	0.55312	0.53675	0.51903	0.7478	0.75971	0.77487	0.14506	0.076392	0.15508	0.18477	0.56343	0.087965	0.093028	0.78892	0.095677	0.0992	0.092667	0.10615	0.11998	0.1423	0.11948	0.13057	0.17124	0.51223	0.17395	0.087273	0.087994	0.088907	0.089
939	0.7456	0.70108	0.60292	0.71821	0.74452	0.72411	0.64122	0.47439	0.42816	0.52682	0.47708	0.40107	0.46138	0.58073	0.52338	0.1741	0.3681	0.14647	0.70689	0.44958	0.49843	0.48162	0.46443	0.7044	0.71687	0.7366	0.1485	0.078154	0.15893	0.19105	0.50739	0.090136	0.09516	0.79775	0.097368	0.096972	0.093348	0.10834	0.1226	0.14566	0.12207	0.13342	0.17644	0.45828	0.17936	0.089432	0.090165	0.091086	0.091169
940	0.75285	0.66904	0.5695	0.69655	0.72798	0.68955	0.59685	0.51489	0.46192	0.48016	0.52482	0.42987	0.50621	0.5234	0.46718	0.15536	0.32578	0.1217	0.65703	0.39793	0.44384	0.42674	0.41026	0.65524	0.66785	0.68978	0.15211	0.080044	0.163	0.19807	0.45143	0.092332	0.097332	0.78327	0.099208	0.095889	0.09444	0.11059	0.12529	0.14917	0.12471	0.13636	0.18212	0.40477	0.18526	0.091614	0.092361	0.093289	0.09336
941	0.73953	0.62983	0.5323	0.66438	0.69742	0.64744	0.54921	0.55925	0.50036	0.4325	0.57876	0.46285	0.55753	0.46586	0.41137	0.14059	0.28482	0.10392	0.60417	0.34701	0.38983	0.37265	0.35705	0.60279	0.61533	0.63803	0.15589	0.082025	0.16732	0.20602	0.39608	0.094549	0.099538	0.7522	0.10116	0.095637	0.095828	0.11289	0.12804	0.15286	0.12742	0.13939	0.1884	0.35223	0.19176	0.093818	0.094579	0.095514	0.095571
942	0.71099	0.58577	0.49229	0.62488	0.6575	0.60045	0.49954	0.60534	0.543	0.38456	0.63596	0.50013	0.61339	0.40877	0.35661	0.12931	0.24628	0.091686	0.5497	0.29786	0.33703	0.3201	0.30557	0.54851	0.56089	0.58345	0.15989	0.084072	0.17194	0.21522	0.342	0.096788	0.10178	0.71082	0.1032	0.095993	0.097433	0.11523	0.13087	0.15674	0.1302	0.14253	0.19542	0.30143	0.19903	0.096042	0.096819	0.097762	0.097801
943	0.67205	0.53854	0.45032	0.5804	0.61146	0.55043	0.44878	0.64938	0.58811	0.33717	0.69031	0.54122	0.66898	0.35287	0.3038	0.12094	0.2113	0.083575	0.49458	0.25178	0.28635	0.27015	0.25697	0.49342	0.50558	0.52745	0.16412	0.086168	0.17693	0.22611	0.29014	0.099049	0.10405	0.66312	0.10531	0.096793	0.099198	0.11762	0.13379	0.16084	0.13306	0.14579	0.2034	0.25353	0.20726	0.098286	0.099081	0.10003	0.10005
944	0.62639	0.48934	0.40715	0.53267	0.56159	0.49863	0.39774	0.68636	0.63231	0.29132	0.73353	0.58455	0.71675	0.29916	0.25422	0.11491	0.18097	0.078437	0.43944	0.21032	0.23912	0.22426	0.21277	0.43822	0.45011	0.47095	0.16864	0.0883	0.18237	0.23935	0.24183	0.10133	0.10635	0.61179	0.10747	0.097919	0.10108	0.12005	0.1368	0.16521	0.13601	0.1492	0.21262	0.21003	0.21677	0.10055	0.10137	0.10233	0.10233
945	0.57651	0.43911	0.36356	0.48293	0.50942	0.44599	0.34728	0.71139	0.6707	0.24825	0.75841	0.62709	0.7488	0.24904	0.20951	0.11073	0.15598	0.075415	0.3849	0.17494	0.19699	0.18414	0.17465	0.38357	0.3951	0.41467	0.1735	0.090462	0.18837	0.25589	0.19877	0.10364	0.10868	0.55847	0.10968	0.099287	0.10305	0.12253	0.13991	0.1699	0.13906	0.15276	0.22348	0.1726	0.22798	0.10284	0.10368	0.10465	0.10462
946	0.52411	0.38866	0.32042	0.43218	0.4561	0.39331	0.29845	0.72159	0.69812	0.20939	0.76241	0.66446	0.76065	0.20427	0.17137	0.108	0.13643	0.073897	0.33166	0.14654	0.16153	0.15118	0.1438	0.33024	0.34126	0.35937	0.17878	0.09265	0.1951	0.27707	0.16257	0.10598	0.11104	0.50421	0.11194	0.10084	0.1051	0.12506	0.14315	0.17498	0.14222	0.15651	0.23655	0.14236	0.24149	0.10516	0.10602	0.107	0.10695
947	0.47038	0.33888	0.27874	0.3813	0.40254	0.34147	0.25258	0.71685	0.71102	0.17608	0.74781	0.69192	0.75288	0.16655	0.14091	0.10639	0.12186	0.073449	0.28077	0.12509	0.1336	0.12582	0.12041	0.27933	0.28958	0.306	0.18457	0.09486	0.20274	0.30475	0.13411	0.10835	0.11345	0.44972	0.11424	0.10253	0.1072	0.12765	0.14652	0.18051	0.1455	0.16049	0.25263	0.11947	0.25818	0.1075	0.10839	0.10938	0.1093
948	0.41624	0.29084	0.23974	0.33125	0.34973	0.29158	0.21122	0.69917	0.70863	0.14915	0.71917	0.70594	0.72937	0.13686	0.11813	0.10565	0.11145	0.073763	0.23365	0.10972	0.11294	0.10743	0.10363	0.23231	0.24146	0.25593	0.191	0.097092	0.21159	0.34143	0.11309	0.11075	0.11589	0.39561	0.11658	0.10434	0.10935	0.13029	0.15005	0.18662	0.14893	0.16472	0.27288	0.10306	0.27928	0.10987	0.11079	0.1118	0.11169
949	0.36263	0.2459	0.20472	0.28323	0.29882	0.24505	0.17587	0.67144	0.69264	0.12858	0.68093	0.70542	0.69471	0.11495	0.10197	0.10558	0.10433	0.074621	0.19203	0.099163	0.098399	0.094689	0.092097	0.19092	0.1986	0.21083	0.19824	0.099347	0.222	0.39021	0.098341	0.11319	0.11837	0.34257	0.11896	0.10624	0.11155	0.133	0.15377	0.19343	0.15253	0.16926	0.2989	0.091787	0.30658	0.11228	0.11323	0.11425	0.1141
950	0.31064	0.20563	0.17477	0.23868	0.25126	0.20352	0.14744	0.63639	0.66586	0.11365	0.63649	0.69158	0.65266	0.099603	0.090988	0.10604	0.099715	0.075866	0.15743	0.09222	0.088574	0.086195	0.084476	0.15665	0.16264	0.17245	0.20651	0.10162	0.23447	0.45448	0.088392	0.11567	0.1209	0.29156	0.12139	0.10822	0.11379	0.13577	0.15769	0.20112	0.15632	0.17417	0.33293	0.084343	0.34263	0.11473	0.11571	0.11675	0.11656
951	0.26167	0.17146	0.15053	0.19922	0.20873	0.1685	0.12591	0.59625	0.63113	0.10328	0.58819	0.66691	0.60593	0.089269	0.083801	0.10691	0.096949	0.077386	0.13053	0.087895	0.082197	0.080778	0.079677	0.1301	0.1344	0.14186	0.21613	0.10393	0.2497	0.53649	0.081944	0.11819	0.12349	0.24392	0.12386	0.11027	0.11608	0.13862	0.16187	0.20991	0.16033	0.17951	0.37787	0.079665	0.39097	0.11721	0.11823	0.11929	0.11906
952	0.21738	0.14419	0.13194	0.16618	0.17277	0.14077	0.11045	0.55267	0.59081	0.096377	0.53757	0.63408	0.55631	0.082582	0.079336	0.1081	0.095546	0.079101	0.11085	0.085448	0.078294	0.07756	0.076894	0.11073	0.11359	0.11902	0.22754	0.10626	0.26863	0.63369	0.077999	0.12076	0.12612	0.20128	0.12639	0.11239	0.11841	0.14155	0.16633	0.22007	0.1646	0.18537	0.4372	0.076964	0.45601	0.11974	0.12081	0.12189	0.12161
953	0.17944	0.1237	0.11838	0.14021	0.14424	0.12014	0.099815	0.50683	0.54671	0.092028	0.4857	0.59543	0.50504	0.078481	0.076799	0.10953	0.095134	0.080955	0.097139	0.084335	0.076147	0.075901	0.075542	0.097273	0.099011	0.10288	0.24135	0.10862	0.29258	0.73376	0.075827	0.12339	0.12882	0.16525	0.12896	0.11456	0.12078	0.14458	0.17113	0.23198	0.16918	0.19185	0.51391	0.075669	0.54156	0.12232	0.12343	0.12454	0.1242
954	0.14894	0.10909	0.10891	0.12097	0.12298	0.10555	0.092801	0.45962	0.50012	0.089529	0.43334	0.55275	0.45298	0.07621	0.075629	0.11117	0.095442	0.082908	0.087957	0.084171	0.07525	0.075352	0.07521	0.088282	0.0892	0.091944	0.25848	0.11101	0.32331	0.81412	0.074915	0.12607	0.13159	0.13675	0.1316	0.11679	0.1232	0.14771	0.17633	0.24613	0.17411	0.19906	0.60773	0.075377	0.64644	0.12495	0.12612	0.12725	0.12685
955	0.12595	0.099107	0.1026	0.10741	0.10794	0.095647	0.08842	0.41175	0.45203	0.088362	0.38119	0.50737	0.40083	0.075234	0.075431	0.11297	0.096274	0.084931	0.082058	0.084684	0.075244	0.075593	0.075606	0.082523	0.082855	0.084807	0.28021	0.11344	0.36301	0.85533	0.0749	0.12882	0.13443	0.11559	0.1343	0.11907	0.12567	0.15094	0.18201	0.26317	0.17945	0.20716	0.70979	0.0758	0.75655	0.12765	0.12887	0.13002	0.12956
956	0.10954	0.092577	0.098654	0.09824	0.097749	0.089212	0.085928	0.36392	0.40328	0.088149	0.33007	0.4603	0.34935	0.075176	0.075924	0.1149	0.097487	0.087007	0.078501	0.085677	0.075872	0.076397	0.07652	0.079069	0.078986	0.080386	0.30846	0.11591	0.41405	0.85604	0.075522	0.13163	0.13736	0.10067	0.13707	0.12141	0.1282	0.15431	0.18826	0.28402	0.18531	0.21635	0.79944	0.076733	0.84361	0.1304	0.13169	0.13287	0.13234
957	0.098345	0.088552	0.096431	0.092324	0.091125	0.08527	0.084783	0.31693	0.3547	0.088619	0.28104	0.41237	0.2995	0.07577	0.076907	0.11694	0.098979	0.089122	0.076607	0.087014	0.076953	0.077601	0.077802	0.07725	0.076872	0.077888	0.34589	0.11842	0.47825	0.829	0.076598	0.13453	0.14038	0.090571	0.13992	0.1238	0.13078	0.15781	0.19521	0.30991	0.19176	0.22688	0.85351	0.07803	0.88399	0.13323	0.13459	0.13581	0.13519
958	0.091006	0.086322	0.095459	0.088751	0.087067	0.083105	0.084599	0.27185	0.30727	0.089578	0.23552	0.36438	0.25256	0.076827	0.07824	0.11908	0.10068	0.091268	0.075895	0.088595	0.078354	0.07909	0.079347	0.076592	0.076005	0.076753	0.39622	0.12098	0.55533	0.78656	0.077997	0.13751	0.1435	0.084005	0.14285	0.12626	0.13342	0.16147	0.20301	0.3425	0.19896	0.23906	0.86463	0.079584	0.87959	0.13614	0.13757	0.13882	0.13812
959	0.086445	0.085369	0.095387	0.086851	0.084831	0.082202	0.085097	0.23001	0.26221	0.090889	0.19514	0.31722	0.2101	0.078212	0.079819	0.12131	0.10253	0.09344	0.076022	0.090353	0.079984	0.080781	0.081079	0.076758	0.076023	0.076583	0.46395	0.12359	0.64049	0.73599	0.079624	0.14058	0.14673	0.079973	0.14587	0.12877	0.13613	0.16531	0.21187	0.38391	0.20706	0.25327	0.84323	0.081323	0.84757	0.13913	0.14065	0.14194	0.14113
960	0.083856	0.085324	0.095962	0.086136	0.083885	0.082195	0.086081	0.1929	0.22099	0.092453	0.16137	0.27205	0.17373	0.079829	0.081573	0.12361	0.1045	0.095636	0.076746	0.092239	0.081776	0.082616	0.082943	0.07751	0.07667	0.077096	0.55301	0.12626	0.72243	0.68143	0.081413	0.14376	0.15009	0.077742	0.14899	0.13135	0.13892	0.16936	0.22207	0.43661	0.21629	0.26999	0.80283	0.083192	0.80155	0.14221	0.14383	0.14517	0.14424
961	0.082661	0.085924	0.097002	0.086264	0.083851	0.082823	0.087412	0.1618	0.18512	0.0942	0.1349	0.23026	0.14449	0.08161	0.083452	0.12599	0.10657	0.097853	0.077894	0.094219	0.083684	0.084553	0.084902	0.078677	0.077764	0.078095	0.66179	0.12899	0.78556	0.62516	0.083318	0.14705	0.1536	0.07679	0.15222	0.134	0.14178	0.17364	0.23394	0.50271	0.22692	0.28977	0.75233	0.085156	0.74878	0.1454	0.14713	0.14851	0.14746
962	0.082453	0.086983	0.098377	0.086988	0.084462	0.083901	0.088989	0.13728	0.1557	0.096082	0.11537	0.19335	0.12242	0.083507	0.08542	0.12844	0.1087	0.10009	0.079343	0.096271	0.085675	0.086564	0.086931	0.080138	0.079174	0.079437	0.77427	0.13179	0.81838	0.56839	0.085305	0.15047	0.15727	0.076745	0.15558	0.13671	0.14472	0.17818	0.24794	0.58219	0.23931	0.31325	0.69667	0.087188	0.69305	0.14871	0.15055	0.15199	0.1508
963	0.082941	0.088369	0.099995	0.088135	0.085529	0.085301	0.090744	0.11903	0.13302	0.098064	0.10166	0.16256	0.10664	0.085488	0.087452	0.13096	0.11091	0.10235	0.081005	0.098378	0.087727	0.08863	0.08901	0.081809	0.08081	0.081022	0.85902	0.13466	0.82033	0.51178	0.087352	0.15403	0.16113	0.077347	0.15908	0.13951	0.14776	0.18303	0.26468	0.66946	0.25392	0.34115	0.63856	0.089272	0.63629	0.15214	0.15412	0.15562	0.15426
964	0.083923	0.089988	0.10179	0.089585	0.08692	0.086929	0.092628	0.1061	0.11646	0.10012	0.092428	0.13841	0.095842	0.087529	0.089532	0.13355	0.11316	0.10464	0.08282	0.10053	0.089824	0.090737	0.091129	0.083628	0.082605	0.082779	0.89282	0.13762	0.79885	0.45573	0.089444	0.15775	0.1652	0.078407	0.16273	0.14238	0.1509	0.18824	0.28495	0.75046	0.27139	0.37418	0.57946	0.091394	0.57942	0.15572	0.15785	0.15941	0.15787
965	0.085254	0.091774	0.10372	0.091249	0.088541	0.08872	0.094607	0.097325	0.10494	0.10224	0.086479	0.12051	0.088755	0.089614	0.091648	0.13621	0.11547	0.10695	0.084742	0.10272	0.091957	0.092877	0.09328	0.085553	0.084513	0.084659	0.88089	0.14066	0.76219	0.40061	0.091571	0.16165	0.16951	0.079792	0.16655	0.14534	0.15415	0.19387	0.30981	0.80684	0.29253	0.41297	0.52018	0.093549	0.52294	0.15945	0.16175	0.16339	0.16165
966	0.086832	0.093683	0.10575	0.093068	0.090325	0.090629	0.096657	0.091648	0.097269	0.10442	0.082884	0.1079	0.084348	0.091733	0.093794	0.13894	0.11783	0.10929	0.086743	0.10495	0.09412	0.095044	0.095457	0.087554	0.086503	0.086627	0.84251	0.1438	0.71638	0.34689	0.093725	0.16574	0.17411	0.081409	0.17056	0.14839	0.15753	0.2	0.34065	0.82799	0.3184	0.45777	0.46127	0.09573	0.46709	0.16336	0.16586	0.16757	0.1656
967	0.088587	0.095682	0.10787	0.095	0.092228	0.092625	0.098763	0.088218	0.092414	0.10663	0.080963	0.099379	0.081849	0.09388	0.095964	0.14175	0.12023	0.11166	0.0888	0.10721	0.096308	0.097235	0.097659	0.089612	0.088553	0.088657	0.79134	0.14706	0.66523	0.29537	0.095905	0.17007	0.17904	0.083189	0.1748	0.15154	0.16103	0.20671	0.37922	0.81734	0.35042	0.50816	0.40323	0.097936	0.41209	0.16748	0.1702	0.172	0.16977
968	0.090468	0.09775	0.11004	0.097015	0.094217	0.094686	0.10091	0.086401	0.089591	0.10888	0.080232	0.093902	0.080708	0.096051	0.098158	0.14463	0.12268	0.11407	0.090901	0.1095	0.098519	0.099449	0.099883	0.091712	0.090647	0.090735	0.73391	0.15043	0.61108	0.24723	0.098106	0.17465	0.18436	0.085087	0.17929	0.15481	0.16469	0.21414	0.42751	0.78556	0.3903	0.56244	0.34668	0.10017	0.35829	0.17183	0.17479	0.17671	0.17417
969	0.092441	0.099871	0.11227	0.099095	0.096271	0.096797	0.1031	0.085737	0.088219	0.11118	0.080346	0.09063	0.080531	0.098243	0.10037	0.1476	0.12518	0.11651	0.093035	0.11182	0.10075	0.10169	0.10213	0.093845	0.092777	0.092849	0.67374	0.15394	0.55533	0.20404	0.10033	0.17953	0.19016	0.087069	0.18408	0.15819	0.16852	0.22245	0.4874	0.74142	0.43999	0.61719	0.29262	0.10242	0.30633	0.17644	0.17969	0.18172	0.17884
970	0.094482	0.10204	0.11456	0.10123	0.098375	0.098948	0.10533	0.085893	0.087876	0.1135	0.081058	0.088935	0.081036	0.10046	0.10261	0.15066	0.12773	0.11899	0.095198	0.11418	0.10301	0.10395	0.1044	0.096007	0.094935	0.094992	0.6126	0.1576	0.4989	0.16732	0.10258	0.18476	0.19652	0.089112	0.18921	0.16171	0.17254	0.23182	0.55922	0.69048	0.50099	0.66722	0.24246	0.1047	0.25729	0.18135	0.18493	0.18711	0.18382
971	0.096576	0.10424	0.11688	0.1034	0.10052	0.10113	0.10758	0.086632	0.088264	0.11587	0.082195	0.08836	0.082026	0.10269	0.10487	0.15382	0.13033	0.12151	0.097385	0.11657	0.1053	0.10623	0.1067	0.098193	0.097118	0.09716	0.55135	0.16142	0.44244	0.13802	0.10484	0.19038	0.20358	0.091201	0.19475	0.16538	0.17677	0.24253	0.63944	0.63609	0.57293	0.70664	0.19795	0.107	0.21267	0.18661	0.19057	0.19292	0.18916
972	0.09871	0.10648	0.11925	0.10561	0.1027	0.10335	0.10987	0.087787	0.089171	0.11827	0.083634	0.088585	0.083361	0.10495	0.10715	0.15708	0.13299	0.12409	0.099596	0.119	0.1076	0.10854	0.10903	0.1004	0.099324	0.099351	0.4905	0.16543	0.3866	0.11607	0.10714	0.19648	0.2115	0.093327	0.20077	0.16921	0.18126	0.2549	0.71832	0.58013	0.65126	0.73064	0.16079	0.10934	0.17415	0.19228	0.19669	0.19923	0.19494
973	0.10088	0.10875	0.12167	0.10785	0.10491	0.1056	0.11219	0.08924	0.090448	0.12072	0.085288	0.089377	0.084942	0.10723	0.10946	0.16046	0.13571	0.12671	0.10183	0.12147	0.10994	0.11088	0.11138	0.10263	0.10155	0.10156	0.43048	0.16966	0.3322	0.10041	0.10946	0.20313	0.2205	0.095482	0.20737	0.17324	0.18604	0.26931	0.7804	0.52374	0.72507	0.73743	0.13183	0.1117	0.14296	0.19843	0.20337	0.20614	0.20121
974	0.10308	0.11105	0.12413	0.11013	0.10714	0.10788	0.11454	0.090904	0.091986	0.1232	0.087094	0.09057	0.086695	0.10953	0.1118	0.16397	0.1385	0.12939	0.10409	0.12399	0.11231	0.11325	0.11377	0.10489	0.10381	0.1038	0.37185	0.17412	0.28038	0.089623	0.11181	0.21046	0.23084	0.097663	0.21466	0.17747	0.19115	0.28623	0.81242	0.4677	0.77907	0.72855	0.11062	0.1141	0.11928	0.20516	0.21073	0.21377	0.2081
975	0.10531	0.11339	0.12663	0.11243	0.10941	0.11018	0.11693	0.092721	0.093712	0.12574	0.08901	0.09205	0.088572	0.11186	0.11417	0.16761	0.14135	0.13214	0.10637	0.12655	0.11471	0.11565	0.11619	0.10717	0.10608	0.10605	0.3154	0.17886	0.23265	0.082472	0.11419	0.21859	0.24286	0.099867	0.22278	0.18194	0.19665	0.30611	0.81311	0.41254	0.80299	0.70692	0.095808	0.11653	0.10221	0.21259	0.2189	0.22229	0.21572
976	0.10756	0.11576	0.12919	0.11477	0.11171	0.11252	0.11935	0.094649	0.095573	0.12832	0.091005	0.093734	0.09054	0.11422	0.11657	0.17141	0.14429	0.13495	0.10867	0.12916	0.11715	0.11809	0.11865	0.10947	0.10838	0.10834	0.26237	0.18391	0.19075	0.077955	0.1166	0.22773	0.25698	0.10209	0.23188	0.18668	0.2026	0.32939	0.79026	0.35883	0.79791	0.67563	0.085846	0.119	0.090403	0.22086	0.22808	0.23189	0.22426
977	0.10985	0.11816	0.13179	0.11715	0.11403	0.11489	0.12182	0.09666	0.097534	0.13095	0.09306	0.095567	0.092574	0.11662	0.11901	0.17539	0.14731	0.13783	0.11101	0.13183	0.11963	0.12057	0.12116	0.11181	0.11071	0.11064	0.21447	0.18932	0.15613	0.075327	0.11906	0.23811	0.27371	0.10435	0.24214	0.19174	0.20909	0.3564	0.75231	0.30727	0.77167	0.63745	0.079396	0.12152	0.08252	0.23019	0.23851	0.24286	0.23393
978	0.11216	0.12061	0.13445	0.11956	0.11639	0.11729	0.12432	0.098734	0.09957	0.13365	0.09516	0.097507	0.094659	0.11905	0.12149	0.17955	0.15042	0.1408	0.11337	0.13456	0.12215	0.1231	0.12371	0.11417	0.11307	0.11298	0.17357	0.19516	0.12933	0.074059	0.12155	0.25007	0.29368	0.10662	0.25378	0.19716	0.2162	0.3873	0.70537	0.25892	0.73194	0.59453	0.075447	0.12408	0.077486	0.24086	0.25054	0.25558	0.24507
979	0.1145	0.12309	0.13717	0.122	0.11878	0.11973	0.12688	0.10086	0.10166	0.1364	0.097297	0.099529	0.096783	0.12151	0.124	0.18393	0.15364	0.14385	0.11577	0.13735	0.12472	0.12567	0.1263	0.11657	0.11546	0.11534	0.1409	0.20148	0.10976	0.07377	0.12409	0.26406	0.31769	0.10892	0.26705	0.203	0.22405	0.42203	0.65337	0.21515	0.68415	0.54847	0.073275	0.12669	0.074503	0.25322	0.26461	0.27056	0.25812
980	0.11688	0.12563	0.13996	0.12449	0.1212	0.12221	0.12948	0.10302	0.1038	0.13922	0.099464	0.10161	0.09894	0.12402	0.12657	0.18854	0.15696	0.147	0.1182	0.14022	0.12734	0.12829	0.12895	0.119	0.11789	0.11774	0.11654	0.20839	0.096122	0.074184	0.12667	0.28073	0.3467	0.11125	0.28227	0.20932	0.23279	0.46021	0.59871	0.17742	0.63183	0.50042	0.072362	0.12936	0.072988	0.26783	0.28138	0.28855	0.27371
981	0.11928	0.1282	0.14281	0.12703	0.12366	0.12474	0.13213	0.10522	0.10598	0.14212	0.10166	0.10375	0.10113	0.12658	0.12919	0.19344	0.16041	0.15026	0.12068	0.14317	0.13001	0.13097	0.13166	0.12147	0.12035	0.12017	0.099346	0.21601	0.086969	0.075104	0.12931	0.30098	0.38189	0.11361	0.29983	0.21622	0.24257	0.501	0.54277	0.14678	0.57708	0.45128	0.072347	0.13209	0.072527	0.28541	0.30176	0.31059	0.29275
982	0.12173	0.13084	0.14574	0.12961	0.12617	0.12731	0.13485	0.10746	0.1082	0.1451	0.10388	0.10592	0.10334	0.12918	0.13186	0.19864	0.16399	0.15364	0.12319	0.1462	0.13275	0.13371	0.13444	0.12398	0.12286	0.12264	0.087697	0.22446	0.08108	0.076388	0.13201	0.32612	0.42448	0.116	0.32021	0.2238	0.25365	0.54287	0.48642	0.12335	0.52117	0.40181	0.072974	0.13488	0.072828	0.30709	0.32708	0.33823	0.31663
983	0.12422	0.13352	0.14875	0.13224	0.12872	0.12993	0.13763	0.10972	0.11044	0.14817	0.10613	0.10813	0.10557	0.13184	0.13459	0.2042	0.16773	0.15714	0.12575	0.14933	0.13555	0.13651	0.13728	0.12654	0.12541	0.12515	0.080065	0.23395	0.077505	0.077932	0.13477	0.35803	0.47548	0.11843	0.344	0.2322	0.26631	0.58365	0.43034	0.10642	0.46501	0.35278	0.074056	0.13775	0.073671	0.33443	0.35921	0.37358	0.34731
984	0.12674	0.13627	0.15185	0.13493	0.13132	0.13261	0.14048	0.11202	0.11272	0.15133	0.1084	0.11038	0.10784	0.13455	0.13738	0.21018	0.17163	0.16079	0.12837	0.15256	0.13842	0.13938	0.1402	0.12915	0.12801	0.12771	0.075286	0.24472	0.075589	0.079663	0.13759	0.39943	0.53484	0.12089	0.37182	0.24159	0.28093	0.62042	0.37514	0.09465	0.40927	0.30512	0.075464	0.14069	0.074905	0.3698	0.4009	0.41968	0.38777
985	0.12932	0.13909	0.15505	0.13768	0.13397	0.13535	0.1434	0.11435	0.11503	0.1546	0.1107	0.11265	0.11013	0.13733	0.14025	0.21665	0.17573	0.1646	0.13103	0.15591	0.14138	0.14234	0.1432	0.13181	0.13066	0.13032	0.072525	0.25709	0.074856	0.08153	0.14049	0.45401	0.60023	0.1234	0.40429	0.25221	0.298	0.65007	0.32164	0.086751	0.35468	0.25997	0.077105	0.14372	0.076421	0.4166	0.45583	0.4803	0.44201
986	0.13195	0.14197	0.15836	0.1405	0.13667	0.13816	0.14641	0.11671	0.11737	0.15799	0.11302	0.11496	0.11245	0.14017	0.14319	0.2237	0.18004	0.16858	0.13376	0.15939	0.14442	0.14538	0.1463	0.13453	0.13338	0.13298	0.071197	0.27152	0.074967	0.083496	0.14347	0.52601	0.66556	0.12595	0.44184	0.26434	0.31809	0.66999	0.27096	0.081674	0.3022	0.21874	0.07891	0.14684	0.078139	0.47925	0.52823	0.55886	0.51454
987	0.13463	0.14494	0.16178	0.14338	0.13944	0.14104	0.14951	0.1191	0.11974	0.16151	0.11538	0.1173	0.11479	0.14309	0.14621	0.23143	0.1846	0.17277	0.13655	0.16301	0.14755	0.14851	0.14949	0.13732	0.13615	0.13569	0.070889	0.28859	0.07568	0.085534	0.14653	0.61782	0.72116	0.12855	0.48436	0.27836	0.34192	0.67872	0.22459	0.078629	0.25313	0.18283	0.080834	0.15007	0.080002	0.56204	0.62034	0.65478	0.60759
988	0.13737	0.148	0.16533	0.14635	0.14227	0.14399	0.1527	0.12153	0.12215	0.16518	0.11777	0.11968	0.11717	0.14609	0.14933	0.24	0.18945	0.17718	0.13941	0.1668	0.15078	0.15174	0.15279	0.14017	0.13899	0.13847	0.071307	0.30914	0.076823	0.087627	0.1497	0.72364	0.75735	0.1312	0.53081	0.29474	0.37023	0.67611	0.18423	0.077042	0.20905	0.15329	0.082842	0.1534	0.081969	0.66469	0.72611	0.757	0.71448
989	0.14018	0.15115	0.16904	0.1494	0.14518	0.14704	0.15601	0.12401	0.12459	0.16902	0.12019	0.12209	0.11959	0.14918	0.15255	0.24956	0.19463	0.18184	0.14234	0.17077	0.15413	0.15509	0.15621	0.14309	0.14191	0.14132	0.072245	0.33434	0.078271	0.089762	0.15296	0.82233	0.7693	0.13391	0.57866	0.31404	0.40374	0.66314	0.1512	0.076501	0.17157	0.1304	0.084912	0.15686	0.084012	0.77372	0.8241	0.84134	0.81294
990	0.14306	0.1544	0.1729	0.15255	0.14817	0.15017	0.15944	0.12652	0.12707	0.17304	0.12266	0.12453	0.12204	0.15236	0.15587	0.26034	0.2002	0.1868	0.14536	0.17494	0.1576	0.15856	0.15976	0.1461	0.14491	0.14424	0.073553	0.36582	0.079937	0.091932	0.15635	0.88449	0.75898	0.13668	0.62377	0.33696	0.4429	0.64143	0.1259	0.076714	0.14168	0.11358	0.087028	0.16046	0.086114	0.85957	0.88514	0.88444	0.87384
991	0.14601	0.15778	0.17695	0.1558	0.15124	0.15341	0.16301	0.12908	0.1296	0.17728	0.12516	0.12702	0.12453	0.15565	0.15932	0.27262	0.20623	0.19209	0.14847	0.17936	0.16121	0.16217	0.16345	0.1492	0.148	0.14724	0.075125	0.40579	0.08176	0.094133	0.15985	0.89719	0.73192	0.13953	0.66107	0.36425	0.4875	0.61278	0.10759	0.077471	0.1193	0.10177	0.089181	0.16421	0.088259	0.8971	0.89689	0.88314	0.88551
[truncated: 209 more rows]
[truncated: 92 more columns]
