# Supplementary material for: Causality Analysis and Cell Network Modeling of Spatial Calcium Signaling Patterns in Liver Lobules
Source: Front Physiol. 2018 Oct 4;9:1377. doi: 10.3389/fphys.2018.01377 (PMC6180170; doi:10.3389/fphys.2018.01377)
Supplement: Supplementary file 1 [file Data_Sheet_1.ZIP › Vadigepalli-Supplementary-Data-Code/Figure_plots.R]

## This R script generates the plots in Fig 5B, 6C, 6D, 7C, 7D, 8A and 8B. Use this after running simulations and writing appropriate data files. 
## The files originally used have been provided for reference.

## In the data, Original ID refers to the cell ID in the 1300 cell dataset. Aliases correspond to only the 141 cells in the selected TE cluster 
## The original IDs and aliases for the cluster can be found in cell_centroid_positions.txt

## Change path to the directory containing all files

setwd("<path>")

## Plotting requires the plotrix package. The following line attached the plotrix package. If not installed, install using install.packages("plotrix")
library("plotrix")

## Color palette for mapping [Ca2+]C values for each cell
cp <- colorRampPalette(c("gray85","red"))(10)

###################################################################################
## Figure 5B
# Requires:
#   1) Centroids of each cell
#   2) [Ca2+]C from experimental data

# Import centroids data from cell_centroid_positions.txt
cell.data <- data.frame(read.table("cell_centroid_positions.txt",sep="\t",header=T,stringsAsFactors=F))
centroids <- as.matrix(cell.data[,c(3,4)])

# Import experimental data
mat <- data.frame(read.table("Fig5_data.txt",sep="\t",skip = 1,header=T,stringsAsFactors = F)) # First line skipped. cell.data has relevant information
mat <- mat[,2:ncol(mat)] # Remove the first column

# Select time slices to plot
tslices <- which(mat[,1]%in%c(768,780,792,804))

x11(width = 11.5,height=3.5) # Open a graphics window
par(mfrow=c(1,4),oma=c(0,0,2,0)) # Divide the plot window, specify margins

for (i in 1:length(tslices)){ # For every time slice
  plot(NA,NA,xlim=range(centroids[,1]),ylim=range(centroids[,2]),xaxt="n",yaxt="n",xlab="",ylab="")  # Create an empty plot
  legend("topleft",paste("T =",mat[tslices[i],1],"sec"),bty="n",cex=1.5)  # Add time point information
  for (j in 1:nrow(centroids)){  #For all cells
    draw.circle(centroids[j,1],centroids[j,2],radius=5,border=rgb(0.85,0.85,0.85,0.85),col=cp[10*mat[tslices[i],(j+1)]]) # Draw a circle representing the cell with mapped intensity
  }
}

mtext("Figure 5B", outer = TRUE, cex = 1.5)

###################################################################################
## Figure 6C
# Requires:
#   1) Centroids of each cell
#   2) [Ca2+]C from simulated data

## !! Centroids imported in plot for Figure 5B

# Import simulated data
# Here first line isn't skipped because the original file only contains the cell alias, not the original ID. No need to skip the first column either.
mat <- as.matrix(read.table("Fig6C_data.txt",sep="\t",header=T))

# Select time slices to plot
tslices <- which(mat[,1]%in%c(746,754,762,770))
tslices <- tslices + 200 # 200 seconds needs to be added because in the simulations, there is no stimulus for the initial 200 seconds

x11(width = 11.5,height=3.5) # Open a graphics window
par(mfrow=c(1,4),oma=c(0,0,2,0)) # Divide the plot window, specify margins

for (i in 1:length(tslices)){ # For every time slice
  plot(NA,NA,xlim=range(centroids[,1]),ylim=range(centroids[,2]),xaxt="n",yaxt="n",xlab="",ylab="")  # Create an empty plot
  legend("topleft",paste("T =",mat[tslices[i],1]-200,"sec"),bty="n",cex=1.5)  # Add time point information
  for (j in 1:nrow(centroids)){  #For all cells
    draw.circle(centroids[j,1],centroids[j,2],radius=5,border=rgb(0.85,0.85,0.85,0.85),col=cp[10*mat[tslices[i],(j+1)]]) # Draw a circle representing the cell with mapped intensity
  }
}

mtext("Figure 6C", outer = TRUE, cex = 1.5)


###################################################################################
## Figure 6D
# Requires:
#   1) Centroids of each cell
#   2) [Ca2+]C from simulated data

## !! Centroids imported in plot for Figure 5B

# Import simulated data
# Here first line isn't skipped because the original file only contains the cell alias, not the original ID. No need to skip the first column either.
mat <- as.matrix(read.table("Fig6D_data.txt",sep="\t",header=T)) 

# Select time slices to plot
tslices <- which(mat[,1]%in%c(746,754,762,770))
tslices <- tslices + 200 # 200 seconds needs to be added because in the simulations, there is no stimulus for the initial 200 seconds

x11(width = 11.5,height=3.5) # Open a graphics window
par(mfrow=c(1,4),oma=c(0,0,2,0)) # Divide the plot window, specify margins

for (i in 1:length(tslices)){ # For every time slice
  plot(NA,NA,xlim=range(centroids[,1]),ylim=range(centroids[,2]),xaxt="n",yaxt="n",xlab="",ylab="")  # Create an empty plot
  legend("topleft",paste("T =",mat[tslices[i],1]-200,"sec"),bty="n",cex=1.5)  # Add time point information
  for (j in 1:nrow(centroids)){  #For all cells
    draw.circle(centroids[j,1],centroids[j,2],radius=5,border=rgb(0.85,0.85,0.85,0.85),col=cp[10*mat[tslices[i],(j+1)]]) # Draw a circle representing the cell with mapped intensity
  }
}

mtext("Figure 6D", outer = TRUE, cex = 1.5)


###################################################################################
## Figure 7C
# Requires:
#   1) Centroids of each cell
#   2) [Ca2+]C from simulated data

## !! Centroids imported in plot for Figure 5B

# Import simulated data
# Here first line isn't skipped because the original file only contains the cell alias, not the original ID. No need to skip the first column either.
mat <- as.matrix(read.table("Fig7C_data.txt",sep="\t",header=T)) 

# Select time slices to plot
tslices <- which(mat[,1]%in%c(755,765,775,785))
tslices <- tslices + 200 # 200 seconds needs to be added because in the simulations, there is no stimulus for the initial 200 seconds

x11(width = 11.5,height=3.5) # Open a graphics window
par(mfrow=c(1,4),oma=c(0,0,2,0)) # Divide the plot window, specify margins

for (i in 1:length(tslices)){ # For every time slice
  plot(NA,NA,xlim=range(centroids[,1]),ylim=range(centroids[,2]),xaxt="n",yaxt="n",xlab="",ylab="")  # Create an empty plot
  legend("topleft",paste("T =",mat[tslices[i],1]-200,"sec"),bty="n",cex=1.5)  # Add time point information
  for (j in 1:nrow(centroids)){  #For all cells
    draw.circle(centroids[j,1],centroids[j,2],radius=5,border=rgb(0.85,0.85,0.85,0.85),col=cp[10*mat[tslices[i],(j+1)]]) # Draw a circle representing the cell with mapped intensity
  }
}

mtext("Figure 7C", outer = TRUE, cex = 1.5)

###################################################################################
## Figure 7D
# Requires:
#   1) Centroids of each cell
#   2) [Ca2+]C from simulated data

## !! Centroids imported in plot for Figure 5B

# Import simulated data
# Here first line isn't skipped because the original file only contains the cell alias, not the original ID. No need to skip the first column either.
mat <- as.matrix(read.table("Fig7D_data.txt",sep="\t",header=T)) 

# Select time slices to plot
tslices <- which(mat[,1]%in%c(755,765,775,785))
tslices <- tslices + 200 # 200 seconds needs to be added because in the simulations, there is no stimulus for the initial 200 seconds

x11(width = 11.5,height=3.5) # Open a graphics window
par(mfrow=c(1,4),oma=c(0,0,2,0)) # Divide the plot window, specify margins

for (i in 1:length(tslices)){ # For every time slice
  plot(NA,NA,xlim=range(centroids[,1]),ylim=range(centroids[,2]),xaxt="n",yaxt="n",xlab="",ylab="")  # Create an empty plot
  legend("topleft",paste("T =",mat[tslices[i],1]-200,"sec"),bty="n",cex=1.5)  # Add time point information
  for (j in 1:nrow(centroids)){  #For all cells
    draw.circle(centroids[j,1],centroids[j,2],radius=5,border=rgb(0.85,0.85,0.85,0.85),col=cp[10*mat[tslices[i],(j+1)]]) # Draw a circle representing the cell with mapped intensity
  }
}

mtext("Figure 7D", outer = TRUE, cex = 1.5)


##################################################################################

## Figure 8A
# Requires:
#   1) Centroids of each cell
#   2) [Ca2+]C from simulated data
#   3) Adjacency matrix
#   4) Gij for Fig 8A

## !! Centroids imported in plot for Figure 5B

# Import adjacency matrix
adj.mat <- as.matrix(read.table("adjacency.txt",sep="\t",header=T,row.names=1))

# Import Gij for Fig 8A
gij <- as.matrix(read.table("Fig8A_Gij.txt",sep="\t",header=T,row.names=1))

histdata <- hist(gij[which(adj.mat==1)],breaks=11,plot=F) # Get histogram of Gij values which have the corresponding elements in the adjacency matrix = 1
h <- histdata$counts/sum(histdata$counts) # Normalize the binned counts

# Import simulated data
# Here first line isn't skipped because the original file only contains the cell alias, not the original ID. No need to skip the first column either.
mat <- as.matrix(read.table("Fig8A_data.txt",sep="\t",header=T,stringsAsFactors = F))

# Select time slices to plot
tslices <- which(mat[,1]%in%c(745,765,785,805))
tslices <- tslices+200 # 200 seconds needs to be added because in the simulations, there is no stimulus for the initial 200 seconds


x11(width = 14.5,height=3.5) # Open a graphics window
par(mfrow=c(1,5),oma=c(0,0,2,0)) # Divide the plot window, specify margins

## Plot normalized histogram using barplot

plot(0.1*(0:9),seq(0,max(h),length.out=10),type="n",xlab="",ylab="",xlim=c(-1,9),xaxt="n",yaxt="n")
axis(1,at=2*(0:4)-0.5,labels=2*(0:4)/10)
axis(2,at=c(0,0.1,0.2))
for (i in 1:length(h)){
  if (i==1){
    rect(xleft=(i-1)-0.85,ybottom=0,xright=(i-1)-0.1,ytop=h[i],border="black",col="gray70")
  } else{
    rect(xleft=(i-1)-0.35,ybottom=0,xright=(i-1)+0.35,ytop=h[i],border="black",col="gray70")  
  }
}

for (i in 1:length(tslices)){ # For every time slice
  plot(NA,NA,xlim=range(centroids[,1]),ylim=range(centroids[,2]),xaxt="n",yaxt="n",xlab="",ylab="")  # Create an empty plot
  legend("topleft",paste("T =",mat[tslices[i],1]-200,"sec"),bty="n",cex=1.5)  # Add time point information
  for (j in 1:nrow(centroids)){  #For all cells
    draw.circle(centroids[j,1],centroids[j,2],radius=5,border=rgb(0.85,0.85,0.85,0.85),col=cp[10*mat[tslices[i],(j+1)]]) # Draw a circle representing the cell with mapped intensity
  }
}

mtext("Figure 8A", outer = TRUE, cex = 1.5)

##################################################################################

## Figure 8B
# Requires:
#   1) Centroids of each cell
#   2) [Ca2+]C from simulated data
#   3) Adjacency matrix
#   4) Gij for Fig 8A

## !! Centroids imported in plot for Figure 5B

# Import adjacency matrix
adj.mat <- as.matrix(read.table("adjacency.txt",sep="\t",header=T,row.names=1))

# Import Gij for Fig 8A
gij <- as.matrix(read.table("Fig8B_Gij.txt",sep="\t",header=T,row.names=1))

histdata <- hist(gij[which(adj.mat==1)],breaks=11,plot=F) # Get histogram of Gij values which have the corresponding elements in the adjacency matrix = 1
h <- histdata$counts/sum(histdata$counts) # Normalize the binned counts

# Import simulated data
# Here first line isn't skipped because the original file only contains the cell alias, not the original ID. No need to skip the first column either.
mat <- as.matrix(read.table("Fig8B_data.txt",sep="\t",header=T,stringsAsFactors = F))

# Select time slices to plot
tslices <- which(mat[,1]%in%c(735,755,775,795))
tslices <- tslices+200 # 200 seconds needs to be added because in the simulations, there is no stimulus for the initial 200 seconds


x11(width = 14.5,height=3.5) # Open a graphics window
par(mfrow=c(1,5),oma=c(0,0,2,0)) # Divide the plot window, specify margins

## Plot normalized histogram using barplot

plot(0.1*(0:9),seq(0,max(h),length.out=10),type="n",xlab="",ylab="",xlim=c(-1,9),xaxt="n",yaxt="n")
axis(1,at=2*(0:4)-0.5,labels=2*(0:4)/10)
axis(2,at=c(0,0.25,0.5))
for (i in 1:length(h)){
  if (i==1){
    rect(xleft=(i-1)-0.85,ybottom=0,xright=(i-1)-0.1,ytop=h[i],border="black",col="gray70")
  } else{
    rect(xleft=(i-1)-0.35,ybottom=0,xright=(i-1)+0.35,ytop=h[i],border="black",col="gray70")  
  }
}

for (i in 1:length(tslices)){ # For every time slice
  plot(NA,NA,xlim=range(centroids[,1]),ylim=range(centroids[,2]),xaxt="n",yaxt="n",xlab="",ylab="")  # Create an empty plot
  legend("topleft",paste("T =",mat[tslices[i],1]-200,"sec"),bty="n",cex=1.5)  # Add time point information
  for (j in 1:nrow(centroids)){  #For all cells
    draw.circle(centroids[j,1],centroids[j,2],radius=5,border=rgb(0.85,0.85,0.85,0.85),col=cp[10*mat[tslices[i],(j+1)]]) # Draw a circle representing the cell with mapped intensity
  }
}

mtext("Figure 8B", outer = TRUE, cex = 1.5)
